# Supplementary material for: Ancient Gene Duplicates in Gossypium (Cotton) Exhibit Near-Complete Expression Divergence
Source: PubMed Central journal article supplement (PMC3971588; doi:10.1093/gbe/evu037), 2014-02-19
Supplement: supp_evu037_Supplementary_File_1.pdf [file supp_evu037_Supplementary_File_1.pdf]

|                    |                    |                    |        |   |   |   |   |
|--------------------|--------------------|--------------------|--------|---|---|---|---|
| .                  | .                  | .                  | .      | . | . | . | . |
| .                  | .                  | .                  | .      | . | . | . | . |
| Vv01g0016          | .                  | .                  | .      | . | . | . | . |
| .                  | .                  | .                  | .      | . | . | . | . |
| .                  | .                  | .                  | .      | . | . | . | . |
| Vv01g0017          | Tc02_g031690       | Gorai.013G096000.1 | .      | . | . | . | . |
| .                  | Vv03g0882          | Tc02_g010670       | .      | . | . | . | . |
| .                  | Gorai.008G017200.1 | Vv14g0936          | .      | . | . | . | . |
| .                  | .                  | .                  | .      | . | . | . | . |
| Vv01g0018          | Tc02_g031720       | Gorai.013G095700.1 | Gorai. | . | . | . | . |
| 005G146800.1       | .                  | .                  | .      | . | . | . | . |
| .                  | .                  | .                  | .      | . | . | . | . |
| .                  | .                  | .                  | .      | . | . | . | . |
| Vv01g0019          | Tc02_g031740       | Gorai.005G146700.1 | .      | . | . | . | . |
| .                  | .                  | .                  | .      | . | . | . | . |
| .                  | .                  | .                  | .      | . | . | . | . |
| Vv01g0020          | Tc02_g031750       | .                  | Gorai. | . | . | . | . |
| 008G175800.1       | Vv03g0857          | Tc02_g031750       | .      | . | . | . | . |
| .                  | .                  | .                  | .      | . | . | . | . |
| .                  | .                  | .                  | .      | . | . | . | . |
| Vv01g0021          | Tc02_g031760       | Gorai.013G095500.1 | .      | . | . | . | . |
| Gorai.008G200200.1 | .                  | .                  | .      | . | . | . | . |
| .                  | .                  | Vv14g0941          | .      | . | . | . | . |
| Gorai.001G208000.1 | Gorai.007G039800.1 | .                  | .      | . | . | . | . |
| Vv01g0022          | Tc02_g031770       | Gorai.013G095400.1 | .      | . | . | . | . |
| .                  | .                  | .                  | .      | . | . | . | . |
| .                  | .                  | .                  | .      | . | . | . | . |
| Vv01g0023          | .                  | .                  | .      | . | . | . | . |
| .                  | .                  | .                  | .      | . | . | . | . |
| .                  | .                  | .                  | .      | . | . | . | . |
| Vv01g0024          | .                  | .                  | .      | . | . | . | . |
| .                  | .                  | .                  | .      | . | . | . | . |
| .                  | .                  | .                  | .      | . | . | . | . |
| Vv01g0025          | .                  | .                  | .      | . | . | . | . |
| .                  | .                  | .                  | .      | . | . | . | . |
| .                  | .                  | .                  | .      | . | . | . | . |
| Vv01g0026          | Tc02_g031830       | Gorai.013G095300.1 | Gorai. | . | . | . | . |
| 005G146500.1       | .                  | .                  | .      | . | . | . | . |
| .                  | .                  | .                  | .      | . | . | . | . |
| .                  | .                  | .                  | .      | . | . | . | . |
| Vv01g0027          | Tc02_g031850       | .                  | Gorai. | . | . | . | . |
| 008G176100.1       | .                  | .                  | .      | . | . | . | . |
| .                  | .                  | .                  | .      | . | . | . | . |
| Vv01g0028          | Tc02_g031860       | .                  | Gorai. | . | . | . | . |
| 008G176200.1       | .                  | .                  | .      | . | . | . | . |
| .                  | .                  | .                  | .      | . | . | . | . |
| Vv01g0029          | Tc02_g031870       | Gorai.013G095200.1 | Gorai. | . | . | . | . |
| 005G146400.1       | .                  | .                  | .      | . | . | . | . |
| .                  | .                  | .                  | .      | . | . | . | . |
| .                  | .                  | .                  | .      | . | . | . | . |
| .                  | .                  | .                  | .      | . | . | . | . |

|                    |                    |                    |   |   |   |                    |   |
|--------------------|--------------------|--------------------|---|---|---|--------------------|---|
| Vv01g0030          | .                  | .                  | . | . | . | .                  | . |
| .                  | .                  | .                  | . | . | . | Vv14g0960          | . |
| .                  | .                  | Gorai.001G208900.1 | . | . | . | .                  | . |
| Vv01g0031          | Tc02_g031880       | Gorai.013G095100.1 | . | . | . | .                  | . |
| .                  | .                  | .                  | . | . | . | .                  | . |
| Vv01g0032          | Tc02_g031890       | Gorai.005G146200.1 | . | . | . | .                  | . |
| .                  | Gorai.008G176300.1 | .                  | . | . | . | .                  | . |
| .                  | .                  | .                  | . | . | . | .                  | . |
| Vv01g0033          | .                  | .                  | . | . | . | .                  | . |
| .                  | .                  | .                  | . | . | . | .                  | . |
| Vv01g0034          | Tc02_g031900       | Gorai.013G095000.1 | . | . | . | Gorai.             | . |
| 005G146000.1       | Gorai.008G176400.1 | .                  | . | . | . | .                  | . |
| .                  | .                  | .                  | . | . | . | .                  | . |
| Vv01g0035          | .                  | .                  | . | . | . | .                  | . |
| .                  | .                  | .                  | . | . | . | .                  | . |
| Vv01g0036          | Tc02_g031930       | .                  | . | . | . | .                  | . |
| .                  | .                  | .                  | . | . | . | .                  | . |
| Vv01g0037          | Tc02_g031960       | .                  | . | . | . | Gorai.             | . |
| 008G176600.1       | .                  | .                  | . | . | . | .                  | . |
| .                  | .                  | .                  | . | . | . | .                  | . |
| Vv01g0038          | Tc02_g031970       | Gorai.013G094700.1 | . | . | . | .                  | . |
| .                  | Gorai.008G199600.1 | .                  | . | . | . | .                  | . |
| .                  | .                  | .                  | . | . | . | .                  | . |
| Vv01g0039          | Tc02_g031980       | Gorai.013G094600.1 | . | . | . | .                  | . |
| .                  | Gorai.008G176700.1 | .                  | . | . | . | .                  | . |
| .                  | .                  | Vv14g0984          | . | . | . | .                  | . |
| .                  | Gorai.006G010000.1 | .                  | . | . | . | .                  | . |
| Vv01g0040          | Tc02_g032000       | Gorai.013G094500.1 | . | . | . | .                  | . |
| .                  | Gorai.008G176800.1 | .                  | . | . | . | .                  | . |
| .                  | .                  | .                  | . | . | . | .                  | . |
| Vv01g0041          | Tc02_g032010       | Gorai.013G094300.1 | . | . | . | .                  | . |
| Gorai.009G326900.1 | .                  | .                  | . | . | . | .                  | . |
| .                  | .                  | .                  | . | . | . | .                  | . |
| Vv01g0042          | Tc02_g032020       | .                  | . | . | . | Gorai.             | . |
| 008G177000.1       | Vv03g0826          | Tc02_g032020       | . | . | . | Gorai.             | . |
| 013G051100.1       | Gorai.002G010900.1 | .                  | . | . | . | .                  | . |
| .                  | .                  | .                  | . | . | . | .                  | . |
| Vv01g0043          | .                  | .                  | . | . | . | Gorai.008G199200.1 | . |
| .                  | .                  | .                  | . | . | . | .                  | . |
| .                  | .                  | .                  | . | . | . | .                  | . |
| Vv01g0044          | Tc02_g032040       | Gorai.013G094200.1 | . | . | . | .                  | . |

|              |                    |                    |                    |                    |        |   |
|--------------|--------------------|--------------------|--------------------|--------------------|--------|---|
|              | Gorai.008G177100.1 | .                  | .                  | .                  | .      | . |
| .            | .                  | .                  | .                  | .                  | .      | . |
| Vv01g0045    | Tc02_g032050       | .                  | .                  | .                  | .      | . |
| .            | .                  | .                  | .                  | .                  | .      | . |
| Vv01g0046    | Tc02_g032060       | Gorai.013G094000.1 | .                  | .                  | .      | . |
| .            | .                  | .                  | .                  | .                  | .      | . |
| Vv01g0047    | .                  | .                  | .                  | .                  | .      | . |
| .            | .                  | .                  | .                  | .                  | .      | . |
| Vv01g0048    | .                  | .                  | .                  | Gorai.008G177200.1 | .      | . |
| .            | .                  | .                  | .                  | .                  | .      | . |
| Vv01g0049    | Tc02_g032070       | .                  | .                  | .                  | .      | . |
| .            | .                  | .                  | .                  | .                  | .      | . |
| Vv01g0050    | .                  | .                  | .                  | .                  | .      | . |
| .            | .                  | .                  | .                  | .                  | .      | . |
| Vv01g0051    | .                  | .                  | .                  | .                  | .      | . |
| .            | .                  | .                  | .                  | .                  | .      | . |
| Vv01g0052    | Tc02_g032120       | Gorai.013G093800.1 | .                  | .                  | .      | . |
| .            | .                  | .                  | .                  | .                  | .      | . |
| Vv01g0053    | Tc02_g032150       | Gorai.013G093700.1 | .                  | .                  | .      | . |
|              | Gorai.008G177400.1 | .                  | .                  | .                  | .      | . |
| .            | .                  | .                  | .                  | .                  | .      | . |
| Vv01g0054    | Tc02_g032160       | .                  | .                  | .                  | Gorai. | . |
| 008G177500.1 | .                  | .                  | .                  | .                  | .      | . |
| .            | Vv14g0990          | .                  | .                  | .                  | .      | . |
| .            | .                  | .                  | .                  | .                  | .      | . |
| Vv01g0055    | .                  | .                  | .                  | .                  | .      | . |
| .            | .                  | .                  | .                  | .                  | .      | . |
| Vv01g0056    | Tc02_g032210       | .                  | Gorai.005G145100.1 | .                  | .      | . |
| .            | .                  | .                  | .                  | .                  | .      | . |
| Vv01g0057    | .                  | .                  | Gorai.009G326400.1 | .                  | .      | . |
| .            | .                  | .                  | .                  | .                  | .      | . |
| Vv01g0058    | Tc02_g032220       | .                  | .                  | .                  | .      | . |
| .            | .                  | .                  | .                  | .                  | .      | . |
| Vv01g0059    | Tc02_g032230       | Gorai.013G093500.1 | .                  | .                  | .      | . |
| .            | .                  | .                  | .                  | .                  | .      | . |
| .            | .                  | .                  | .                  | .                  | .      | . |

|                    |              |                    |   |                    |   |
|--------------------|--------------|--------------------|---|--------------------|---|
| Vv01g0060          | .            | Gorai.013G093400.1 | . | .                  | . |
| .                  | .            | .                  | . | .                  | . |
| Vv01g0061          | .            | .                  | . | .                  | . |
| .                  | .            | .                  | . | .                  | . |
| Vv01g0062          | Tc02_g007240 | .                  | . | .                  | . |
| .                  | .            | .                  | . | .                  | . |
| Vv01g0063          | Tc02_g000140 | .                  | . | .                  | . |
| .                  | .            | .                  | . | .                  | . |
| Vv01g0064          | .            | .                  | . | .                  | . |
| .                  | .            | .                  | . | .                  | . |
| Vv01g0065          | Tc02_g007550 | .                  | . | .                  | . |
| .                  | .            | .                  | . | .                  | . |
| Vv01g0066          | .            | .                  | . | .                  | . |
| .                  | .            | .                  | . | .                  | . |
| Vv01g0067          | .            | .                  | . | Gorai.008G196700.1 | . |
| .                  | .            | .                  | . | .                  | . |
| Vv01g0068          | Tc02_g032310 | .                  | . | .                  | . |
| .                  | .            | .                  | . | .                  | . |
| Vv01g0069          | Tc02_g032320 | Gorai.013G092600.1 | . | Gorai.             | . |
| 005G144700.1       | .            | Gorai.008G177900.1 | . | .                  | . |
| .                  | .            | .                  | . | .                  | . |
| Vv01g0070          | Tc02_g032330 | Gorai.013G092500.1 | . | Gorai.             | . |
| 005G144600.1       | .            | .                  | . | .                  | . |
| .                  | .            | .                  | . | .                  | . |
| Vv01g0071          | Tc02_g032340 | Gorai.013G092400.1 | . | .                  | . |
| Gorai.009G326300.1 | .            | Gorai.008G178000.1 | . | .                  | . |
| .                  | .            | .                  | . | .                  | . |
| Vv01g0072          | Tc02_g032350 | Gorai.013G092300.1 | . | Gorai.             | . |
| 005G144500.1       | .            | Gorai.008G178100.1 | . | .                  | . |
| .                  | .            | .                  | . | .                  | . |
| Vv01g0073          | Tc02_g032360 | Gorai.013G092200.1 | . | .                  | . |
| .                  | .            | .                  | . | .                  | . |
| Vv01g0074          | .            | .                  | . | .                  | . |
| .                  | .            | .                  | . | .                  | . |
| Vv01g0075          | .            | .                  | . | .                  | . |

|                    |              |                    |                    |   |        |   |   |
|--------------------|--------------|--------------------|--------------------|---|--------|---|---|
| .                  | .            | .                  | .                  | . | .      | . | . |
| .                  | .            | .                  | .                  | . | .      | . | . |
| Vv01g0076          | .            | .                  | .                  | . | .      | . | . |
| .                  | .            | .                  | .                  | . | .      | . | . |
| .                  | .            | .                  | .                  | . | .      | . | . |
| Vv01g0077          | .            | .                  | .                  | . | .      | . | . |
| .                  | .            | .                  | .                  | . | .      | . | . |
| .                  | .            | .                  | .                  | . | .      | . | . |
| Vv01g0078          | .            | .                  | Gorai.005G141600.1 | . | .      | . | . |
| .                  | .            | .                  | .                  | . | .      | . | . |
| .                  | .            | .                  | .                  | . | .      | . | . |
| Vv01g0079          | .            | .                  | .                  | . | .      | . | . |
| .                  | .            | .                  | .                  | . | .      | . | . |
| .                  | .            | .                  | .                  | . | .      | . | . |
| Vv01g0080          | .            | .                  | .                  | . | .      | . | . |
| .                  | .            | .                  | .                  | . | .      | . | . |
| .                  | .            | .                  | .                  | . | .      | . | . |
| Vv01g0081          | .            | .                  | .                  | . | .      | . | . |
| Vv03g0789          | Tc02_g010190 | .                  | .                  | . | .      | . | . |
| Gorai.012G147500.1 | .            | .                  | .                  | . | .      | . | . |
| .                  | .            | .                  | .                  | . | .      | . | . |
| Vv01g0082          | Tc02_g032420 | .                  | .                  | . | Gorai. | . | . |
| 008G196400.1       | .            | .                  | .                  | . | .      | . | . |
| .                  | .            | .                  | .                  | . | .      | . | . |
| Vv01g0083          | .            | .                  | .                  | . | .      | . | . |
| .                  | .            | .                  | .                  | . | .      | . | . |
| .                  | .            | .                  | .                  | . | .      | . | . |
| Vv01g0084          | .            | .                  | Gorai.009G326200.1 | . | .      | . | . |
| .                  | .            | .                  | .                  | . | .      | . | . |
| .                  | .            | .                  | .                  | . | .      | . | . |
| Vv01g0085          | Tc02_g032460 | .                  | .                  | . | .      | . | . |
| .                  | .            | .                  | .                  | . | .      | . | . |
| .                  | .            | .                  | .                  | . | .      | . | . |
| Vv01g0086          | Tc02_g032490 | .                  | Gorai.009G326100.1 | . | .      | . | . |
| .                  | .            | .                  | .                  | . | .      | . | . |
| .                  | .            | .                  | .                  | . | .      | . | . |
| Vv01g0087          | Tc02_g032500 | Gorai.013G091300.1 | .                  | . | .      | . | . |
| Gorai.009G326000.1 | .            | .                  | .                  | . | .      | . | . |
| .                  | .            | .                  | .                  | . | .      | . | . |
| .                  | .            | .                  | .                  | . | .      | . | . |
| Vv01g0088          | Tc02_g032510 | Gorai.013G091200.1 | .                  | . | .      | . | . |
| .                  | .            | .                  | .                  | . | .      | . | . |
| .                  | .            | .                  | .                  | . | .      | . | . |
| Vv01g0089          | Tc02_g032520 | .                  | .                  | . | .      | . | . |
| .                  | .            | .                  | .                  | . | .      | . | . |
| .                  | .            | .                  | .                  | . | .      | . | . |
| Vv01g0090          | Tc02_g032530 | .                  | .                  | . | .      | . | . |
| .                  | .            | .                  | .                  | . | .      | . | . |
| .                  | .            | .                  | .                  | . | .      | . | . |
| Vv01g0091          | Tc02_g032540 | Gorai.013G090900.1 | .                  | . | .      | . | . |

|                    |                    |                    |                    |   |
|--------------------|--------------------|--------------------|--------------------|---|
| Gorai.009G325900.1 | Gorai.008G193600.1 | .                  | .                  | . |
| .                  | .                  | .                  | .                  | . |
| Vv01g0092          | Tc02_g000190       | .                  | .                  | . |
| .                  | .                  | .                  | .                  | . |
| Vv01g0093          | .                  | .                  | .                  | . |
| .                  | .                  | .                  | .                  | . |
| Vv01g0094          | Tc02_g000200       | .                  | .                  | . |
| .                  | .                  | .                  | .                  | . |
| Vv01g0095          | .                  | .                  | .                  | . |
| .                  | .                  | .                  | .                  | . |
| Vv01g0096          | .                  | .                  | .                  | . |
| .                  | .                  | .                  | .                  | . |
| Vv01g0097          | .                  | .                  | .                  | . |
| .                  | .                  | .                  | .                  | . |
| Vv01g0098          | .                  | .                  | .                  | . |
| .                  | .                  | .                  | .                  | . |
| Vv01g0099          | .                  | .                  | .                  | . |
| .                  | .                  | .                  | .                  | . |
| Vv01g0100          | .                  | .                  | .                  | . |
| .                  | .                  | .                  | .                  | . |
| Vv01g0101          | Tc02_g005790       | .                  | .                  | . |
| .                  | .                  | .                  | .                  | . |
| Vv01g0102          | Tc02_g005760       | .                  | .                  | . |
| .                  | .                  | .                  | .                  | . |
| Vv01g0103          | .                  | .                  | .                  | . |
| .                  | .                  | .                  | .                  | . |
| Vv01g0104          | Tc02_g000220       | Gorai.013G088700.1 | .                  | . |
| .                  | Vv03g0788          | Tc02_g010170       | Gorai.             | . |
| 013G050300.1       | Gorai.005G231800.1 | Gorai.002G010300.1 | .                  | . |
| .                  | .                  | .                  | .                  | . |
| Vv01g0105          | Tc02_g007590       | .                  | .                  | . |
| .                  | .                  | .                  | .                  | . |
| Vv01g0106          | Tc02_g032850       | .                  | Gorai.009G323300.1 | . |
| .                  | .                  | .                  | .                  | . |
| Vv01g0107          | .                  | .                  | .                  | . |

|              |              |                    |              |   |   |        |   |
|--------------|--------------|--------------------|--------------|---|---|--------|---|
| .            | .            | .                  | .            | . | . | .      | . |
| .            | .            | .                  | .            | . | . | .      | . |
| Vv01g0108    | Tc02_g000240 | .                  | .            | . | . | .      | . |
| .            | .            | .                  | .            | . | . | .      | . |
| Vv01g0109    | .            | .                  | .            | . | . | .      | . |
| .            | .            | .                  | .            | . | . | .      | . |
| Vv01g0110    | .            | .                  | .            | . | . | .      | . |
| .            | .            | .                  | .            | . | . | .      | . |
| Vv01g0111    | Tc02_g000250 | .                  | .            | . | . | .      | . |
| .            | .            | .                  | .            | . | . | .      | . |
| Vv01g0112    | Tc02_g000260 | Gorai.002G162700.1 | .            | . | . | .      | . |
| .            | .            | Vv03g0773          | Tc02_g010020 | . | . | .      | . |
| .            | .            | Gorai.012G148400.1 | .            | . | . | .      | . |
| .            | .            | .                  | .            | . | . | .      | . |
| Vv01g0113    | Tc02_g000270 | .                  | .            | . | . | .      | . |
| .            | .            | .                  | .            | . | . | .      | . |
| Vv01g0114    | .            | .                  | .            | . | . | .      | . |
| .            | .            | .                  | .            | . | . | .      | . |
| Vv01g0115    | Tc02_g000310 | .                  | .            | . | . | .      | . |
| .            | .            | .                  | .            | . | . | .      | . |
| Vv01g0116    | Tc02_g032930 | .                  | .            | . | . | Gorai. | . |
| 008G179600.1 | .            | .                  | .            | . | . | .      | . |
| .            | .            | .                  | .            | . | . | .      | . |
| Vv01g0117    | Tc02_g032940 | .                  | .            | . | . | .      | . |
| .            | .            | .                  | .            | . | . | .      | . |
| Vv01g0118    | .            | .                  | .            | . | . | .      | . |
| .            | .            | .                  | .            | . | . | .      | . |
| Vv01g0119    | .            | .                  | .            | . | . | .      | . |
| .            | .            | .                  | .            | . | . | .      | . |
| Vv01g0120    | Tc02_g000340 | .                  | .            | . | . | .      | . |
| .            | .            | .                  | .            | . | . | .      | . |
| Vv01g0121    | Tc02_g000350 | .                  | .            | . | . | .      | . |
| .            | .            | .                  | .            | . | . | .      | . |
| Vv01g0122    | Tc02_g000360 | .                  | .            | . | . | .      | . |
| .            | .            | .                  | .            | . | . | .      | . |
| Vv01g0123    | .            | .                  | .            | . | . | .      | . |
| .            | .            | .                  | .            | . | . | .      | . |



|           |              |                    |   |   |   |   |
|-----------|--------------|--------------------|---|---|---|---|
| Vv01g0124 | .            | .                  | . | . | . | . |
| .         | .            | .                  | . | . | . | . |
| Vv01g0125 | Tc02_g000370 | Gorai.002G163400.1 | . | . | . | . |
| .         | .            | .                  | . | . | . | . |
| Vv01g0126 | Tc02_g000380 | .                  | . | . | . | . |
| .         | .            | .                  | . | . | . | . |
| Vv01g0127 | Tc02_g000400 | .                  | . | . | . | . |
| .         | .            | .                  | . | . | . | . |
| Vv01g0128 | Tc02_g000440 | .                  | . | . | . | . |
| .         | .            | .                  | . | . | . | . |
| Vv01g0129 | Tc02_g000450 | .                  | . | . | . | . |
| .         | .            | .                  | . | . | . | . |
| Vv01g0130 | .            | .                  | . | . | . | . |
| .         | .            | .                  | . | . | . | . |
| Vv01g0131 | .            | .                  | . | . | . | . |
| .         | .            | .                  | . | . | . | . |
| Vv01g0132 | Tc02_g000460 | Gorai.002G163800.1 | . | . | . | . |
| .         | .            | .                  | . | . | . | . |
| Vv01g0133 | .            | .                  | . | . | . | . |
| .         | .            | .                  | . | . | . | . |
| Vv01g0134 | Tc02_g000490 | .                  | . | . | . | . |
| .         | .            | .                  | . | . | . | . |
| Vv01g0135 | .            | .                  | . | . | . | . |
| .         | .            | .                  | . | . | . | . |
| Vv01g0136 | .            | .                  | . | . | . | . |
| .         | .            | .                  | . | . | . | . |
| Vv01g0137 | Tc02_g000510 | .                  | . | . | . | . |
| .         | .            | .                  | . | . | . | . |
| Vv01g0138 | .            | .                  | . | . | . | . |
| .         | .            | .                  | . | . | . | . |
| Vv01g0139 | Tc02_g000520 | .                  | . | . | . | . |
| .         | .            | .                  | . | . | . | . |
| Vv01g0140 | Tc02_g000530 | .                  | . | . | . | . |

|           |                    |                    |   |   |   |   |
|-----------|--------------------|--------------------|---|---|---|---|
| .         | .                  | .                  | . | . | . | . |
| Vv01g0141 | Tc02_g000540       | .                  | . | . | . | . |
| .         | .                  | .                  | . | . | . | . |
| Vv01g0142 | Tc02_g000550       | .                  | . | . | . | . |
| .         | .                  | .                  | . | . | . | . |
| Vv01g0143 | Gorai.002G163900.1 | .                  | . | . | . | . |
| .         | .                  | .                  | . | . | . | . |
| Vv01g0144 | Tc02_g000580       | .                  | . | . | . | . |
| .         | .                  | .                  | . | . | . | . |
| Vv01g0145 | Tc02_g0007620      | .                  | . | . | . | . |
| .         | .                  | .                  | . | . | . | . |
| Vv01g0146 | Tc02_g000590       | .                  | . | . | . | . |
| .         | .                  | .                  | . | . | . | . |
| Vv01g0147 | Tc02_g000600       | .                  | . | . | . | . |
| .         | .                  | .                  | . | . | . | . |
| Vv01g0148 | Tc02_g000630       | .                  | . | . | . | . |
| .         | .                  | .                  | . | . | . | . |
| Vv01g0149 | Tc02_g000680       | .                  | . | . | . | . |
| .         | .                  | .                  | . | . | . | . |
| Vv01g0150 | .                  | .                  | . | . | . | . |
| .         | .                  | .                  | . | . | . | . |
| Vv01g0151 | Tc02_g033130       | .                  | . | . | . | . |
| .         | .                  | .                  | . | . | . | . |
| Vv01g0152 | .                  | .                  | . | . | . | . |
| .         | .                  | .                  | . | . | . | . |
| Vv01g0153 | .                  | .                  | . | . | . | . |
| .         | .                  | .                  | . | . | . | . |
| Vv01g0154 | Tc02_g000690       | Gorai.002G164000.1 | . | . | . | . |
| .         | .                  | .                  | . | . | . | . |
| Vv01g0155 | Tc02_g000700       | .                  | . | . | . | . |
| .         | .                  | .                  | . | . | . | . |
| Vv01g0156 | Tc02_g000710       | .                  | . | . | . | . |
| .         | .                  | .                  | . | . | . | . |
| .         | .                  | .                  | . | . | . | . |

|           |              |                    |   |   |   |   |   |
|-----------|--------------|--------------------|---|---|---|---|---|
| Vv01g0157 | .            | .                  | . | . | . | . | . |
| .         | .            | .                  | . | . | . | . | . |
| Vv01g0158 | Tc02_g026550 | .                  | . | . | . | . | . |
| .         | .            | .                  | . | . | . | . | . |
| Vv01g0159 | Tc02_g000730 | .                  | . | . | . | . | . |
| .         | .            | .                  | . | . | . | . | . |
| Vv01g0160 | Tc02_g000740 | .                  | . | . | . | . | . |
| .         | .            | .                  | . | . | . | . | . |
| Vv01g0161 | Tc02_g000750 | .                  | . | . | . | . | . |
| .         | .            | .                  | . | . | . | . | . |
| Vv01g0162 | Tc02_g000760 | Gorai.002G164100.1 | . | . | . | . | . |
| .         | .            | .                  | . | . | . | . | . |
| Vv01g0163 | .            | .                  | . | . | . | . | . |
| .         | .            | .                  | . | . | . | . | . |
| Vv01g0164 | .            | .                  | . | . | . | . | . |
| .         | .            | .                  | . | . | . | . | . |
| Vv01g0165 | .            | .                  | . | . | . | . | . |
| .         | .            | .                  | . | . | . | . | . |
| Vv01g0166 | Tc02_g000770 | .                  | . | . | . | . | . |
| .         | .            | .                  | . | . | . | . | . |
| Vv01g0167 | .            | .                  | . | . | . | . | . |
| .         | .            | .                  | . | . | . | . | . |
| Vv01g0168 | .            | .                  | . | . | . | . | . |
| .         | .            | .                  | . | . | . | . | . |
| Vv01g0169 | .            | .                  | . | . | . | . | . |
| .         | .            | .                  | . | . | . | . | . |
| Vv01g0170 | .            | .                  | . | . | . | . | . |
| .         | .            | .                  | . | . | . | . | . |
| Vv01g0171 | .            | .                  | . | . | . | . | . |
| .         | .            | .                  | . | . | . | . | . |
| Vv01g0172 | .            | .                  | . | . | . | . | . |
| .         | .            | .                  | . | . | . | . | . |
| Vv01g0173 | .            | .                  | . | . | . | . | . |
| .         | .            | .                  | . | . | . | . | . |

|           |                    |   |   |   |   |   |   |
|-----------|--------------------|---|---|---|---|---|---|
| Vv01g0174 | .                  | . | . | . | . | . | . |
| .         | .                  | . | . | . | . | . | . |
| Vv01g0175 | .                  | . | . | . | . | . | . |
| .         | .                  | . | . | . | . | . | . |
| Vv01g0176 | .                  | . | . | . | . | . | . |
| .         | .                  | . | . | . | . | . | . |
| Vv01g0177 | .                  | . | . | . | . | . | . |
| .         | .                  | . | . | . | . | . | . |
| Vv01g0178 | .                  | . | . | . | . | . | . |
| .         | .                  | . | . | . | . | . | . |
| Vv01g0179 | .                  | . | . | . | . | . | . |
| .         | .                  | . | . | . | . | . | . |
| Vv01g0180 | Tc02_g007670       | . | . | . | . | . | . |
| .         | .                  | . | . | . | . | . | . |
| Vv01g0181 | .                  | . | . | . | . | . | . |
| .         | .                  | . | . | . | . | . | . |
| Vv01g0182 | .                  | . | . | . | . | . | . |
| .         | .                  | . | . | . | . | . | . |
| Vv01g0183 | Gorai.013G069000.1 | . | . | . | . | . | . |
| .         | .                  | . | . | . | . | . | . |
| Vv01g0184 | .                  | . | . | . | . | . | . |
| .         | .                  | . | . | . | . | . | . |
| Vv01g0185 | .                  | . | . | . | . | . | . |
| .         | .                  | . | . | . | . | . | . |
| Vv01g0186 | .                  | . | . | . | . | . | . |
| .         | .                  | . | . | . | . | . | . |
| Vv01g0187 | .                  | . | . | . | . | . | . |
| .         | .                  | . | . | . | . | . | . |
| Vv01g0188 | .                  | . | . | . | . | . | . |
| .         | .                  | . | . | . | . | . | . |
| Vv01g0189 | .                  | . | . | . | . | . | . |
| .         | .                  | . | . | . | . | . | . |
| Vv01g0190 | .                  | . | . | . | . | . | . |

|              |              |                    |   |   |   |        |   |
|--------------|--------------|--------------------|---|---|---|--------|---|
| .            | .            | .                  | . | . | . | .      | . |
| .            | .            | .                  | . | . | . | .      | . |
| Vv01g0191    | .            | .                  | . | . | . | .      | . |
| .            | .            | .                  | . | . | . | .      | . |
| .            | .            | .                  | . | . | . | .      | . |
| Vv01g0192    | Tc02_g028890 | .                  | . | . | . | Gorai. | . |
| 008G168700.1 | .            | .                  | . | . | . | .      | . |
| .            | .            | .                  | . | . | . | .      | . |
| Vv01g0193    | .            | .                  | . | . | . | .      | . |
| .            | .            | .                  | . | . | . | .      | . |
| .            | .            | .                  | . | . | . | .      | . |
| Vv01g0194    | .            | .                  | . | . | . | .      | . |
| .            | .            | .                  | . | . | . | .      | . |
| .            | .            | .                  | . | . | . | .      | . |
| Vv01g0195    | .            | .                  | . | . | . | .      | . |
| .            | .            | .                  | . | . | . | .      | . |
| .            | .            | .                  | . | . | . | .      | . |
| Vv01g0196    | Tc02_g026760 | .                  | . | . | . | .      | . |
| .            | .            | .                  | . | . | . | .      | . |
| .            | .            | .                  | . | . | . | .      | . |
| Vv01g0197    | .            | .                  | . | . | . | .      | . |
| .            | .            | .                  | . | . | . | .      | . |
| .            | .            | .                  | . | . | . | .      | . |
| Vv01g0198    | .            | .                  | . | . | . | .      | . |
| .            | .            | .                  | . | . | . | .      | . |
| .            | .            | .                  | . | . | . | .      | . |
| Vv01g0199    | .            | .                  | . | . | . | .      | . |
| .            | .            | .                  | . | . | . | .      | . |
| .            | .            | .                  | . | . | . | .      | . |
| Vv01g0200    | .            | .                  | . | . | . | .      | . |
| .            | .            | .                  | . | . | . | .      | . |
| .            | .            | .                  | . | . | . | .      | . |
| Vv01g0201    | .            | .                  | . | . | . | .      | . |
| .            | .            | .                  | . | . | . | .      | . |
| .            | .            | .                  | . | . | . | .      | . |
| Vv01g0202    | Tc02_g028420 | .                  | . | . | . | .      | . |
| .            | .            | .                  | . | . | . | .      | . |
| .            | .            | .                  | . | . | . | .      | . |
| Vv01g0203    | .            | .                  | . | . | . | .      | . |
| .            | .            | .                  | . | . | . | .      | . |
| .            | .            | .                  | . | . | . | .      | . |
| Vv01g0204    | .            | .                  | . | . | . | .      | . |
| .            | .            | .                  | . | . | . | .      | . |
| .            | .            | .                  | . | . | . | .      | . |
| Vv01g0205    | .            | .                  | . | . | . | .      | . |
| .            | .            | .                  | . | . | . | .      | . |
| .            | .            | .                  | . | . | . | .      | . |
| Vv01g0206    | .            | Gorai.013G070000.1 | . | . | . | .      | . |
| .            | .            | .                  | . | . | . | .      | . |
| .            | .            | .                  | . | . | . | .      | . |

|                    |              |                    |   |   |                    |   |   |
|--------------------|--------------|--------------------|---|---|--------------------|---|---|
| Vv01g0207          | .            | .                  | . | . | .                  | . | . |
| .                  | .            | .                  | . | . | .                  | . | . |
| Vv01g0208          | .            | .                  | . | . | .                  | . | . |
| .                  | .            | .                  | . | . | .                  | . | . |
| Vv01g0209          | .            | Gorai.013G070100.1 | . | . | .                  | . | . |
| Gorai.008G148400.1 | .            | .                  | . | . | .                  | . | . |
| .                  | .            | .                  | . | . | .                  | . | . |
| Vv01g0210          | .            | .                  | . | . | .                  | . | . |
| .                  | .            | .                  | . | . | .                  | . | . |
| Vv01g0211          | .            | .                  | . | . | .                  | . | . |
| .                  | .            | .                  | . | . | .                  | . | . |
| Vv01g0212          | .            | .                  | . | . | .                  | . | . |
| .                  | .            | .                  | . | . | .                  | . | . |
| Vv01g0213          | .            | Gorai.013G070300.1 | . | . | .                  | . | . |
| Gorai.008G148600.1 | .            | .                  | . | . | .                  | . | . |
| .                  | .            | .                  | . | . | .                  | . | . |
| Vv01g0214          | .            | .                  | . | . | .                  | . | . |
| .                  | .            | .                  | . | . | .                  | . | . |
| Vv01g0215          | .            | .                  | . | . | Gorai.008G149000.1 | . | . |
| .                  | .            | .                  | . | . | .                  | . | . |
| Vv01g0216          | Tc02_g028310 | .                  | . | . | .                  | . | . |
| .                  | .            | .                  | . | . | .                  | . | . |
| Vv01g0217          | .            | .                  | . | . | .                  | . | . |
| .                  | .            | .                  | . | . | .                  | . | . |
| Vv01g0218          | .            | .                  | . | . | Gorai.008G149200.1 | . | . |
| .                  | .            | .                  | . | . | .                  | . | . |
| Vv01g0219          | .            | Gorai.013G070600.1 | . | . | .                  | . | . |
| .                  | .            | .                  | . | . | .                  | . | . |
| Vv01g0220          | .            | .                  | . | . | .                  | . | . |
| .                  | .            | .                  | . | . | .                  | . | . |
| Vv01g0221          | .            | .                  | . | . | .                  | . | . |
| .                  | .            | .                  | . | . | .                  | . | . |
| Vv01g0222          | .            | .                  | . | . | Gorai.008G149600.1 | . | . |
| .                  | .            | .                  | . | . | .                  | . | . |
| .                  | .            | .                  | . | . | .                  | . | . |

|           |   |                    |   |                    |   |
|-----------|---|--------------------|---|--------------------|---|
| Vv01g0223 | . | Gorai.013G070800.1 | . | .                  | . |
| .         | . | .                  | . | .                  | . |
| Vv01g0224 | . | .                  | . | .                  | . |
| .         | . | .                  | . | .                  | . |
| Vv01g0225 | . | .                  | . | .                  | . |
| .         | . | .                  | . | .                  | . |
| Vv01g0226 | . | .                  | . | .                  | . |
| .         | . | .                  | . | .                  | . |
| Vv01g0227 | . | .                  | . | .                  | . |
| .         | . | .                  | . | .                  | . |
| Vv01g0228 | . | .                  | . | Gorai.008G149700.1 | . |
| .         | . | .                  | . | .                  | . |
| Vv01g0229 | . | .                  | . | .                  | . |
| .         | . | .                  | . | .                  | . |
| Vv01g0230 | . | .                  | . | .                  | . |
| .         | . | .                  | . | .                  | . |
| Vv01g0231 | . | .                  | . | .                  | . |
| .         | . | .                  | . | .                  | . |
| Vv01g0232 | . | .                  | . | .                  | . |
| .         | . | .                  | . | .                  | . |
| Vv01g0233 | . | .                  | . | .                  | . |
| .         | . | .                  | . | .                  | . |
| Vv01g0234 | . | .                  | . | .                  | . |
| .         | . | .                  | . | .                  | . |
| Vv01g0235 | . | .                  | . | .                  | . |
| .         | . | .                  | . | .                  | . |
| Vv01g0236 | . | .                  | . | .                  | . |
| .         | . | .                  | . | .                  | . |
| Vv01g0237 | . | .                  | . | .                  | . |
| .         | . | .                  | . | .                  | . |
| Vv01g0238 | . | .                  | . | .                  | . |
| .         | . | .                  | . | .                  | . |
| Vv01g0239 | . | .                  | . | .                  | . |
| .         | . | .                  | . | .                  | . |

|              |                    |              |   |   |                    |        |   |
|--------------|--------------------|--------------|---|---|--------------------|--------|---|
| Vv01g0240    | .                  | .            | . | . | .                  | .      | . |
| .            | .                  | .            | . | . | .                  | .      | . |
| Vv01g0241    | .                  | .            | . | . | .                  | .      | . |
| .            | .                  | .            | . | . | .                  | .      | . |
| Vv01g0242    | .                  | .            | . | . | .                  | .      | . |
| .            | .                  | .            | . | . | .                  | .      | . |
| Vv01g0243    | .                  | .            | . | . | .                  | .      | . |
| .            | .                  | .            | . | . | .                  | .      | . |
| Vv01g0244    | .                  | .            | . | . | .                  | .      | . |
| .            | .                  | .            | . | . | .                  | .      | . |
| Vv01g0245    | .                  | .            | . | . | .                  | .      | . |
| .            | .                  | .            | . | . | .                  | .      | . |
| Vv01g0246    | .                  | .            | . | . | .                  | .      | . |
| .            | .                  | .            | . | . | .                  | .      | . |
| Vv01g0247    | Tc02_g034940       | .            | . | . | .                  | .      | . |
| .            | .                  | .            | . | . | .                  | .      | . |
| Vv01g0248    | Gorai.013G078900.1 | .            | . | . | .                  | .      | . |
| .            | .                  | .            | . | . | .                  | .      | . |
| Vv01g0249    | Tc02_g034930       | .            | . | . | .                  | .      | . |
| .            | .                  | .            | . | . | .                  | .      | . |
| Vv01g0250    | Tc02_g034910       | .            | . | . | .                  | Gorai. | . |
| 008G188600.1 | .                  | .            | . | . | .                  | .      | . |
| .            | .                  | .            | . | . | .                  | .      | . |
| Vv01g0251    | Tc02_g034900       | .            | . | . | .                  | Gorai. | . |
| 008G188500.1 | Vv17g0468          | Tc03_g013460 | . | . | .                  | .      | . |
| .            | .                  | .            | . | . | .                  | .      | . |
| Vv01g0252    | Tc02_g034890       | .            | . | . | .                  | .      | . |
| .            | .                  | .            | . | . | .                  | .      | . |
| Vv01g0253    | .                  | .            | . | . | Gorai.008G188400.1 | .      | . |
| .            | .                  | .            | . | . | .                  | .      | . |
| Vv01g0254    | Tc02_g034870       | .            | . | . | .                  | Gorai. | . |
| 008G188300.1 | .                  | .            | . | . | .                  | .      | . |
| .            | .                  | .            | . | . | .                  | .      | . |
| Vv01g0255    | Tc02_g034860       | .            | . | . | .                  | Gorai. | . |
| 008G188200.1 | .                  | .            | . | . | .                  | .      | . |
| .            | .                  | .            | . | . | .                  | .      | . |



|              |              |                    |   |        |
|--------------|--------------|--------------------|---|--------|
| Vv01g0256    | Tc02_g034850 | Gorai.013G079100.1 | . | .      |
| .            | .            | .                  | . | .      |
| Vv01g0257    | .            | .                  | . | .      |
| .            | .            | .                  | . | .      |
| Vv01g0258    | .            | .                  | . | .      |
| .            | .            | .                  | . | .      |
| Vv01g0259    | .            | .                  | . | .      |
| .            | .            | .                  | . | .      |
| Vv01g0260    | .            | .                  | . | .      |
| .            | .            | .                  | . | .      |
| Vv01g0261    | .            | .                  | . | .      |
| .            | .            | .                  | . | .      |
| Vv01g0262    | .            | .                  | . | .      |
| .            | .            | .                  | . | .      |
| Vv01g0263    | .            | .                  | . | .      |
| .            | .            | .                  | . | .      |
| Vv01g0264    | .            | .                  | . | .      |
| .            | .            | .                  | . | .      |
| Vv01g0265    | .            | .                  | . | .      |
| .            | .            | .                  | . | .      |
| Vv01g0266    | .            | .                  | . | .      |
| .            | .            | .                  | . | .      |
| Vv01g0267    | .            | .                  | . | .      |
| .            | .            | .                  | . | .      |
| Vv01g0268    | .            | .                  | . | .      |
| .            | .            | .                  | . | .      |
| Vv01g0269    | Tc02_g034810 | .                  | . | Gorai. |
| 008G188000.1 | .            | .                  | . | .      |
| .            | .            | .                  | . | .      |
| Vv01g0270    | .            | .                  | . | .      |
| .            | .            | .                  | . | .      |
| Vv01g0271    | Tc02_g034800 | .                  | . | Gorai. |
| 008G187900.1 | .            | .                  | . | .      |
| .            | .            | .                  | . | .      |
| Vv01g0272    | Tc02_g034780 | Gorai.013G079300.1 | . | .      |
| .            | .            | .                  | . | .      |

|              |                    |                    |                    |   |   |   |           |
|--------------|--------------------|--------------------|--------------------|---|---|---|-----------|
| Vv01g0273    | .                  | .                  | .                  | . | . | . | .         |
|              | .                  | .                  | .                  | . | . | . | .         |
|              | Tc04_g015480       | .                  | .                  | . | . | . | Vv14g0852 |
| Vv01g0274    | Tc02_g034770       | .                  | .                  | . | . | . | Gorai.    |
| 008G187800.1 | .                  | Vv17g0457          | Tc03_g013490       | . | . | . | .         |
|              | Gorai.007G041200.1 | Gorai.008G187800.1 | .                  | . | . | . | .         |
| Vv01g0275    | .                  | .                  | .                  | . | . | . | .         |
|              | .                  | .                  | .                  | . | . | . | .         |
| Vv01g0276    | Tc02_g034750       | .                  | .                  | . | . | . | Gorai.    |
| 008G187600.1 | .                  | .                  | .                  | . | . | . | .         |
| Vv01g0277    | Tc02_g034740       | .                  | .                  | . | . | . | Gorai.    |
| 008G187500.1 | .                  | .                  | .                  | . | . | . | .         |
| Vv01g0278    | Tc02_g034730       | .                  | Gorai.005G137500.1 | . | . | . | .         |
|              | Gorai.008G187400.1 | .                  | .                  | . | . | . | .         |
|              | .                  | .                  | .                  | . | . | . | .         |
| Vv01g0279    | Tc02_g034720       | .                  | .                  | . | . | . | Gorai.    |
| 008G187300.1 | .                  | .                  | .                  | . | . | . | .         |
| Vv01g0280    | Tc02_g034710       | .                  | .                  | . | . | . | Gorai.    |
| 008G187200.1 | .                  | .                  | .                  | . | . | . | .         |
|              | Vv14g0848          | Tc04_g015320       | .                  | . | . | . | .         |
| Vv01g0281    | Tc02_g034700       | .                  | .                  | . | . | . | Gorai.    |
| 008G187100.1 | .                  | .                  | .                  | . | . | . | .         |
| Vv01g0282    | Tc02_g034690       | .                  | .                  | . | . | . | Gorai.    |
| 008G187000.1 | .                  | Vv17g0444          | .                  | . | . | . | .         |
|              | Gorai.008G187000.1 | .                  | .                  | . | . | . | .         |
| Vv01g0283    | Tc02_g034680       | .                  | Gorai.005G137600.1 | . | . | . | .         |
|              | .                  | .                  | .                  | . | . | . | .         |
| Vv01g0284    | Tc02_g000260       | .                  | .                  | . | . | . | .         |
|              | .                  | .                  | .                  | . | . | . | .         |
| Vv01g0285    | Tc02_g034670       | Gorai.013G079400.1 | .                  | . | . | . | .         |
|              | .                  | .                  | .                  | . | . | . | .         |
| Vv01g0286    | Tc02_g034660       | .                  | .                  | . | . | . | Gorai.    |
| 008G186900.1 | .                  | .                  | .                  | . | . | . | .         |
| Vv01g0287    | Tc02_g034650       | .                  | .                  | . | . | . | Gorai.    |
| 008G186800.1 | .                  | Vv17g0440          | .                  | . | . | . | .         |
|              | Gorai.008G186800.1 | .                  | Vv14g0842          | . | . | . | .         |

|                    |                    |                    |        |   |   |   |   |
|--------------------|--------------------|--------------------|--------|---|---|---|---|
| Tc04_g015290       | .                  | .                  | .      | . | . | . | . |
| Vv01g0288          | .                  | .                  | .      | . | . | . | . |
| .                  | .                  | .                  | .      | . | . | . | . |
| .                  | .                  | .                  | .      | . | . | . | . |
| Vv01g0289          | Tc02_g034640       | Gorai.013G079600.1 | .      | . | . | . | . |
| Gorai.008G186700.1 | .                  | .                  | .      | . | . | . | . |
| .                  | .                  | .                  | .      | . | . | . | . |
| .                  | .                  | .                  | .      | . | . | . | . |
| Vv01g0290          | Tc02_g034630       | Gorai.013G079900.1 | Gorai. | . | . | . | . |
| 005G137800.1       | .                  | Vv17g0437          | .      | . | . | . | . |
| Gorai.006G063200.1 | .                  | .                  | .      | . | . | . | . |
| .                  | .                  | .                  | .      | . | . | . | . |
| Vv01g0291          | Tc02_g034610       | .                  | Gorai. | . | . | . | . |
| 008G186500.1       | Vv17g0436          | .                  | .      | . | . | . | . |
| Gorai.008G186500.1 | .                  | .                  | .      | . | . | . | . |
| .                  | .                  | .                  | .      | . | . | . | . |
| Vv01g0292          | .                  | .                  | .      | . | . | . | . |
| .                  | .                  | .                  | .      | . | . | . | . |
| .                  | .                  | .                  | .      | . | . | . | . |
| Vv01g0293          | Tc02_g034600       | .                  | Gorai. | . | . | . | . |
| 008G186300.1       | .                  | .                  | .      | . | . | . | . |
| .                  | .                  | .                  | .      | . | . | . | . |
| Vv01g0294          | Tc02_g034590       | .                  | Gorai. | . | . | . | . |
| 008G186200.1       | .                  | .                  | .      | . | . | . | . |
| .                  | Vv14g0841          | Tc04_g015260       | .      | . | . | . | . |
| .                  | .                  | .                  | .      | . | . | . | . |
| Vv01g0295          | Tc02_g034580       | .                  | .      | . | . | . | . |
| .                  | .                  | .                  | .      | . | . | . | . |
| .                  | .                  | .                  | .      | . | . | . | . |
| Vv01g0296          | Tc02_g000600       | .                  | .      | . | . | . | . |
| .                  | .                  | .                  | .      | . | . | . | . |
| .                  | .                  | .                  | .      | . | . | . | . |
| Vv01g0297          | .                  | .                  | .      | . | . | . | . |
| .                  | .                  | .                  | .      | . | . | . | . |
| .                  | .                  | .                  | .      | . | . | . | . |
| Vv01g0298          | .                  | .                  | .      | . | . | . | . |
| .                  | .                  | .                  | .      | . | . | . | . |
| .                  | .                  | .                  | .      | . | . | . | . |
| Vv01g0299          | .                  | Gorai.005G187600.1 | .      | . | . | . | . |
| .                  | .                  | .                  | .      | . | . | . | . |
| .                  | .                  | .                  | .      | . | . | . | . |
| Vv01g0300          | Tc02_g034570       | Gorai.005G138000.1 | .      | . | . | . | . |
| .                  | .                  | .                  | .      | . | . | . | . |
| .                  | .                  | .                  | .      | . | . | . | . |
| Vv01g0301          | Tc02_g034560       | Gorai.013G080000.1 | Gorai. | . | . | . | . |
| 005G138100.1       | Gorai.008G185900.1 | .                  | .      | . | . | . | . |
| .                  | .                  | .                  | .      | . | . | . | . |
| .                  | .                  | .                  | .      | . | . | . | . |
| Vv01g0302          | Tc02_g034540       | .                  | Gorai. | . | . | . | . |
| 008G185700.1       | .                  | .                  | .      | . | . | . | . |

|                    |                    |                    |        |   |        |   |
|--------------------|--------------------|--------------------|--------|---|--------|---|
| Vv01g0303          | Tc02_g034530       | .                  | .      | . | Gorai. | . |
| 008G185600.1       | .                  | .                  | .      | . | .      | . |
| Vv01g0304          | Gorai.013G080100.1 | .                  | .      | . | .      | . |
| .                  | .                  | .                  | .      | . | .      | . |
| Vv01g0305          | Tc02_g034510       | Gorai.013G080200.1 | .      | . | .      | . |
| Gorai.008G185500.1 | .                  | .                  | .      | . | .      | . |
| .                  | .                  | .                  | .      | . | .      | . |
| Vv01g0306          | Tc02_g034500       | .                  | .      | . | Gorai. | . |
| 008G185400.1       | .                  | .                  | .      | . | .      | . |
| Vv01g0307          | Tc02_g034490       | .                  | .      | . | Gorai. | . |
| 008G185300.1       | .                  | .                  | .      | . | .      | . |
| Vv01g0308          | .                  | .                  | .      | . | .      | . |
| .                  | .                  | .                  | .      | . | .      | . |
| Vv01g0309          | Tc02_g034480       | Gorai.013G080300.1 | Gorai. | . | .      | . |
| 005G138200.1       | .                  | Vv17g0427          | .      | . | .      | . |
| .                  | .                  | .                  | .      | . | .      | . |
| Vv01g0310          | Tc02_g034470       | Gorai.013G080400.1 | .      | . | .      | . |
| .                  | .                  | .                  | .      | . | .      | . |
| Vv01g0311          | Tc02_g034460       | Gorai.013G080600.1 | .      | . | .      | . |
| .                  | .                  | .                  | .      | . | .      | . |
| Vv01g0312          | Tc02_g034450       | Gorai.013G080800.1 | .      | . | .      | . |
| .                  | .                  | .                  | .      | . | .      | . |
| Vv01g0313          | .                  | .                  | .      | . | .      | . |
| .                  | .                  | .                  | .      | . | .      | . |
| Vv01g0314          | Tc02_g034440       | .                  | .      | . | .      | . |
| Vv17g0421          | Tc03_g031200       | .                  | .      | . | .      | . |
| .                  | .                  | .                  | .      | . | .      | . |
| Vv01g0315          | Tc02_g034430       | Gorai.013G081000.1 | .      | . | .      | . |
| Gorai.008G185100.1 | .                  | .                  | .      | . | .      | . |
| .                  | .                  | .                  | .      | . | .      | . |
| Vv01g0316          | .                  | .                  | .      | . | .      | . |
| .                  | .                  | .                  | .      | . | .      | . |
| Vv01g0317          | Tc02_g034420       | Gorai.002G219800.1 | .      | . | .      | . |
| Gorai.008G185000.1 | .                  | .                  | .      | . | .      | . |
| .                  | .                  | .                  | .      | . | .      | . |
| .                  | .                  | .                  | .      | . | .      | . |

|              |                    |                    |                    |                    |        |
|--------------|--------------------|--------------------|--------------------|--------------------|--------|
| Vv01g0318    | Tc02_g034400       | .                  | .                  | .                  | Gorai. |
| 008G184800.1 | .                  | Vv17g0417          | .                  | .                  | Gorai. |
| 006G062300.1 | .                  | Gorai.008G184700.1 | .                  | Gorai.006G195300.1 | .      |
| .            | .                  | .                  | .                  | .                  | .      |
| Vv01g0319    | Tc02_g034390       | .                  | .                  | .                  | .      |
| .            | .                  | .                  | .                  | .                  | .      |
| Vv14g0817    | .                  | .                  | .                  | .                  | .      |
| Vv01g0320    | Tc02_g034380       | .                  | .                  | .                  | Gorai. |
| 008G184700.1 | .                  | .                  | .                  | .                  | .      |
| .            | .                  | .                  | .                  | .                  | .      |
| Vv01g0321    | Tc02_g034360       | .                  | .                  | .                  | Gorai. |
| 008G184600.1 | .                  | .                  | .                  | .                  | .      |
| .            | Vv14g0816          | Tc04_g015100       | .                  | .                  | .      |
| .            | .                  | .                  | .                  | .                  | .      |
| Vv01g0322    | Tc02_g034340       | Gorai.013G081300.1 | .                  | .                  | .      |
| .            | Gorai.008G184500.1 | Vv17g0406          | .                  | .                  | .      |
| .            | .                  | Gorai.008G184500.1 | .                  | .                  | .      |
| .            | .                  | .                  | .                  | .                  | .      |
| Vv01g0323    | Tc02_g034330       | .                  | .                  | .                  | Gorai. |
| 008G184400.1 | .                  | Vv17g0404          | Tc03_g023370       | .                  | .      |
| .            | Gorai.008G184400.1 | .                  | Gorai.006G195100.1 | .                  | .      |
| .            | .                  | .                  | .                  | .                  | .      |
| Vv01g0324    | Tc02_g034320       | .                  | .                  | .                  | Gorai. |
| 008G184300.1 | .                  | .                  | .                  | .                  | .      |
| .            | .                  | .                  | .                  | .                  | .      |
| Vv01g0325    | Tc02_g034310       | .                  | Gorai.005G138300.1 | .                  | .      |
| .            | .                  | .                  | .                  | .                  | .      |
| .            | Vv14g0810          | .                  | .                  | .                  | Gorai. |
| 007G180900.1 | .                  | .                  | .                  | .                  | .      |
| Vv01g0326    | Tc02_g034300       | Gorai.013G081400.1 | .                  | .                  | .      |
| .            | .                  | .                  | .                  | .                  | .      |
| .            | .                  | .                  | .                  | .                  | .      |
| Vv01g0327    | Tc02_g034290       | Gorai.013G081500.1 | .                  | .                  | .      |
| .            | .                  | .                  | .                  | .                  | .      |
| .            | .                  | .                  | .                  | .                  | .      |
| Vv01g0328    | Tc02_g034280       | Gorai.013G081600.1 | .                  | Gorai.             | .      |
| 005G138400.1 | .                  | .                  | .                  | .                  | .      |
| .            | .                  | Vv14g0808          | Tc04_g014920       | .                  | .      |
| .            | .                  | .                  | .                  | .                  | .      |
| Vv01g0329    | .                  | .                  | .                  | .                  | .      |
| .            | .                  | .                  | .                  | .                  | .      |
| .            | .                  | .                  | .                  | .                  | .      |
| Vv01g0330    | Tc02_g034270       | Gorai.013G081700.1 | .                  | .                  | .      |
| .            | .                  | .                  | .                  | .                  | .      |
| .            | .                  | .                  | .                  | .                  | .      |
| Vv01g0331    | Tc02_g034250       | Gorai.013G082000.1 | .                  | .                  | .      |
| .            | Gorai.008G184000.1 | .                  | .                  | .                  | .      |
| .            | .                  | .                  | .                  | .                  | .      |
| .            | .                  | .                  | .                  | .                  | .      |
| Vv01g0332    | .                  | .                  | .                  | .                  | .      |

|                    |                    |                    |                    |   |                    |   |   |
|--------------------|--------------------|--------------------|--------------------|---|--------------------|---|---|
| .                  | .                  | .                  | .                  | . | .                  | . | . |
| .                  | .                  | .                  | .                  | . | .                  | . | . |
| Vv01g0333          | Tc02_g034240       | Gorai.013G077100.1 | .                  | . | .                  | . | . |
| .                  | .                  | .                  | .                  | . | .                  | . | . |
| .                  | .                  | .                  | .                  | . | .                  | . | . |
| Vv01g0334          | Tc02_g034230       | Gorai.005G138500.1 | .                  | . | .                  | . | . |
|                    | Gorai.008G183900.1 | .                  | .                  | . | .                  | . | . |
| .                  | .                  | .                  | .                  | . | .                  | . | . |
| .                  | .                  | .                  | .                  | . | .                  | . | . |
| Vv01g0335          | .                  | .                  | .                  | . | .                  | . | . |
| .                  | .                  | .                  | .                  | . | .                  | . | . |
| .                  | .                  | .                  | .                  | . | .                  | . | . |
| Vv01g0336          | Tc02_g034220       | Gorai.005G138600.1 | .                  | . | .                  | . | . |
| .                  | .                  | .                  | .                  | . | .                  | . | . |
| .                  | .                  | .                  | .                  | . | .                  | . | . |
| Vv01g0337          | Tc02_g034190       | Gorai.013G076800.1 | .                  | . | .                  | . | . |
| .                  | .                  | .                  | .                  | . | .                  | . | . |
| .                  | Vv14g0806          | Tc04_g014900       | .                  | . | .                  | . | . |
| .                  | .                  | .                  | .                  | . | .                  | . | . |
| Vv01g0338          | .                  | .                  | .                  | . | .                  | . | . |
| .                  | .                  | .                  | .                  | . | .                  | . | . |
| .                  | .                  | .                  | .                  | . | .                  | . | . |
| Vv01g0339          | .                  | .                  | .                  | . | .                  | . | . |
| .                  | .                  | .                  | .                  | . | .                  | . | . |
| .                  | .                  | .                  | .                  | . | .                  | . | . |
| Vv01g0340          | Tc02_g034150       | Gorai.013G076300.1 | .                  | . | .                  | . | . |
|                    | Gorai.008G183500.1 | .                  | .                  | . | .                  | . | . |
| .                  | .                  | .                  | .                  | . | .                  | . | . |
| .                  | .                  | .                  | .                  | . | .                  | . | . |
| Vv01g0341          | .                  | Gorai.013G076100.1 | .                  | . | .                  | . | . |
| Gorai.008G183300.1 | .                  | .                  | .                  | . | .                  | . | . |
| .                  | .                  | .                  | .                  | . | .                  | . | . |
| .                  | .                  | .                  | .                  | . | .                  | . | . |
| Vv01g0342          | .                  | .                  | .                  | . | Gorai.008G180600.1 | . | . |
| .                  | .                  | .                  | .                  | . | .                  | . | . |
| .                  | .                  | .                  | .                  | . | .                  | . | . |
| Vv01g0343          | .                  | .                  | .                  | . | .                  | . | . |
| .                  | .                  | .                  | .                  | . | .                  | . | . |
| .                  | .                  | .                  | .                  | . | .                  | . | . |
| Vv01g0344          | .                  | Gorai.002G218500.1 | .                  | . | .                  | . | . |
| .                  | .                  | .                  | .                  | . | .                  | . | . |
|                    | Vv14g0801          | .                  | .                  | . | .                  | . | . |
| Vv01g0345          | .                  | .                  | Gorai.005G190200.1 | . | .                  | . | . |
| .                  | .                  | .                  | .                  | . | .                  | . | . |
| .                  | .                  | .                  | .                  | . | .                  | . | . |
| Vv01g0346          | .                  | .                  | .                  | . | .                  | . | . |
| .                  | .                  | .                  | .                  | . | .                  | . | . |
| .                  | .                  | .                  | .                  | . | .                  | . | . |
| Vv01g0347          | .                  | Gorai.002G218400.1 | .                  | . | .                  | . | . |
| .                  | Vv17g0394          | .                  | .                  | . | .                  | . | . |

|                    |                    |                    |                    |   |   |           |   |
|--------------------|--------------------|--------------------|--------------------|---|---|-----------|---|
| Vv01g0348          | .                  | .                  | .                  | . | . | .         | . |
| .                  | .                  | .                  | .                  | . | . | .         | . |
| Vv01g0349          | .                  | .                  | .                  | . | . | .         | . |
| .                  | .                  | .                  | .                  | . | . | .         | . |
| Vv01g0350          | .                  | .                  | .                  | . | . | .         | . |
| .                  | .                  | .                  | .                  | . | . | .         | . |
| Vv01g0351          | Tc02_g010100       | Gorai.002G217800.1 | Gorai.             | . | . | .         | . |
| 005G190300.1       | .                  | Vv17g0390          | .                  | . | . | .         | . |
|                    | Gorai.006G061200.1 | .                  | .                  | . | . | Vv14g0795 | . |
|                    | Tc04_g014830       | .                  | .                  | . | . | .         | . |
| Vv01g0352          | .                  | Gorai.002G216000.1 | Gorai.005G190500.1 | . | . | .         | . |
| .                  | .                  | .                  | .                  | . | . | .         | . |
| .                  | .                  | .                  | .                  | . | . | .         | . |
| Vv01g0353          | .                  | Gorai.005G190600.1 | .                  | . | . | .         | . |
| .                  | Vv17g0383          | .                  | .                  | . | . | .         | . |
| .                  | Vv14g0790          | Tc04_g014790       | .                  | . | . | .         | . |
| Gorai.007G181500.1 | .                  | .                  | .                  | . | . | .         | . |
| Vv01g0354          | .                  | Gorai.005G190700.1 | .                  | . | . | .         | . |
| .                  | .                  | .                  | .                  | . | . | .         | . |
| Vv01g0355          | .                  | Gorai.005G191500.1 | .                  | . | . | .         | . |
| .                  | .                  | .                  | .                  | . | . | .         | . |
| Vv01g0356          | .                  | Gorai.005G191700.1 | .                  | . | . | .         | . |
| .                  | .                  | .                  | .                  | . | . | .         | . |
| Vv01g0357          | .                  | Gorai.005G191800.1 | .                  | . | . | .         | . |
| .                  | .                  | .                  | .                  | . | . | .         | . |
|                    | Vv14g0788          | Tc04_g014770       | .                  | . | . | .         | . |
| .                  | .                  | .                  | .                  | . | . | .         | . |
| Vv01g0358          | Tc02_g009800       | .                  | .                  | . | . | .         | . |
| .                  | .                  | .                  | .                  | . | . | .         | . |
| Vv01g0359          | .                  | Gorai.009G347400.1 | .                  | . | . | .         | . |
| .                  | .                  | .                  | .                  | . | . | .         | . |
| Vv01g0360          | .                  | Gorai.005G192000.1 | .                  | . | . | .         | . |
|                    | Gorai.012G122000.1 | .                  | .                  | . | . | .         | . |
| .                  | .                  | .                  | .                  | . | . | .         | . |
| Vv01g0361          | .                  | .                  | .                  | . | . | .         | . |
| .                  | .                  | .                  | .                  | . | . | .         | . |
| Vv01g0362          | .                  | .                  | .                  | . | . | .         | . |
| .                  | .                  | .                  | .                  | . | . | .         | . |

|              |                    |                    |   |                    |                    |           |   |
|--------------|--------------------|--------------------|---|--------------------|--------------------|-----------|---|
| Vv01g0363    | .                  | .                  | . | .                  | .                  | .         | . |
| .            | .                  | .                  | . | .                  | .                  | .         | . |
| Vv01g0364    | .                  | .                  | . | .                  | .                  | Gorai.    | . |
| 012G122100.1 | .                  | .                  | . | .                  | .                  | .         | . |
| .            | .                  | .                  | . | .                  | .                  | .         | . |
| Vv01g0365    | .                  | .                  | . | .                  | .                  | Gorai.    | . |
| 012G122200.1 | .                  | .                  | . | .                  | .                  | .         | . |
| .            | .                  | .                  | . | .                  | .                  | .         | . |
| Vv01g0366    | .                  | .                  | . | .                  | .                  | .         | . |
| .            | .                  | .                  | . | .                  | .                  | .         | . |
| .            | .                  | .                  | . | .                  | .                  | .         | . |
| Vv01g0367    | .                  | .                  | . | .                  | .                  | Gorai.    | . |
| 012G122300.1 | .                  | .                  | . | .                  | .                  | .         | . |
| .            | .                  | .                  | . | .                  | .                  | .         | . |
| Vv01g0368    | .                  | .                  | . | .                  | .                  | .         | . |
| .            | .                  | .                  | . | .                  | .                  | .         | . |
| .            | .                  | .                  | . | .                  | .                  | .         | . |
| Vv01g0369    | .                  | .                  | . | .                  | .                  | .         | . |
| .            | .                  | .                  | . | .                  | .                  | .         | . |
| .            | .                  | .                  | . | .                  | .                  | .         | . |
| Vv01g0370    | .                  | .                  | . | .                  | Gorai.009G347600.1 | .         | . |
| .            | .                  | .                  | . | .                  | .                  | .         | . |
| .            | .                  | .                  | . | .                  | .                  | .         | . |
| Vv01g0371    | .                  | .                  | . | .                  | .                  | .         | . |
| .            | .                  | .                  | . | .                  | .                  | .         | . |
| .            | .                  | .                  | . | .                  | .                  | .         | . |
| Vv01g0372    | .                  | .                  | . | .                  | .                  | .         | . |
| .            | .                  | .                  | . | .                  | .                  | Vv14g0779 | . |
| Tc04_g014670 | .                  | .                  | . | .                  | Gorai.007G181800.1 | .         | . |
| .            | .                  | .                  | . | .                  | .                  | .         | . |
| Vv01g0373    | .                  | .                  | . | .                  | .                  | .         | . |
| .            | .                  | .                  | . | .                  | .                  | .         | . |
| .            | .                  | .                  | . | .                  | .                  | .         | . |
| Vv01g0374    | .                  | .                  | . | .                  | .                  | .         | . |
| Vv17g0355    | .                  | Gorai.001G081000.1 | . | .                  | .                  | .         | . |
| .            | Vv14g0771          | Tc04_g014610       | . | .                  | .                  | .         | . |
| .            | .                  | .                  | . | .                  | .                  | .         | . |
| Vv01g0375    | .                  | .                  | . | .                  | .                  | .         | . |
| .            | .                  | .                  | . | .                  | .                  | .         | . |
| .            | .                  | .                  | . | .                  | .                  | .         | . |
| Vv01g0376    | .                  | .                  | . | .                  | .                  | .         | . |
| .            | .                  | .                  | . | .                  | .                  | .         | . |
| .            | .                  | .                  | . | .                  | .                  | .         | . |
| Vv01g0377    | Tc02_g009740       | .                  | . | .                  | .                  | .         | . |
| .            | .                  | .                  | . | .                  | .                  | .         | . |
| Vv14g0767    | Tc04_g014560       | .                  | . | .                  | .                  | .         | . |
| Vv01g0378    | Tc02_g011150       | .                  | . | Gorai.009G347800.1 | .                  | .         | . |
| .            | Gorai.012G123200.1 | .                  | . | .                  | .                  | .         | . |



|              |                    |                    |                    |           |        |           |   |
|--------------|--------------------|--------------------|--------------------|-----------|--------|-----------|---|
| .            | .                  | .                  | .                  | .         | .      | .         | . |
| .            | .                  | .                  | .                  | .         | .      | .         | . |
| Vv01g0379    | .                  | .                  | .                  | .         | .      | .         | . |
| .            | .                  | .                  | .                  | .         | .      | .         | . |
| Vv01g0380    | .                  | .                  | .                  | .         | .      | .         | . |
| .            | .                  | .                  | .                  | .         | .      | .         | . |
| Vv01g0381    | .                  | .                  | .                  | .         | .      | .         | . |
| Vv17g0353    | .                  | .                  | .                  | .         | .      | .         | . |
| .            | .                  | .                  | .                  | .         | .      | .         | . |
| Vv01g0382    | .                  | .                  | .                  | .         | .      | .         | . |
| .            | .                  | .                  | .                  | .         | .      | .         | . |
| Vv01g0383    | .                  | .                  | .                  | .         | .      | .         | . |
| .            | .                  | .                  | .                  | .         | .      | .         | . |
| Vv01g0384    | .                  | .                  | Gorai.005G192100.1 | .         | Gorai. | .         | . |
| 009G347900.1 | .                  | Gorai.012G124300.1 | .                  | Vv17g0351 | .      | .         | . |
|              | Gorai.001G081300.1 | .                  | .                  | .         | .      | .         | . |
| Vv14g0764    | Tc04_g014420       | .                  | .                  | .         | Gorai. | .         | . |
| 011G228800.1 | .                  | .                  | .                  | .         | .      | .         | . |
| Vv01g0385    | .                  | .                  | .                  | .         | .      | .         | . |
| .            | .                  | .                  | .                  | .         | .      | .         | . |
| Vv01g0386    | .                  | .                  | .                  | .         | .      | .         | . |
| .            | .                  | .                  | .                  | .         | .      | .         | . |
| Vv01g0387    | .                  | .                  | .                  | .         | Gorai. | .         | . |
| 012G124200.1 | Vv17g0350          | .                  | Gorai.001G081500.1 | .         | .      | .         | . |
| .            | .                  | .                  | .                  | .         | .      | .         | . |
| Vv01g0388    | .                  | .                  | .                  | .         | .      | .         | . |
| .            | .                  | .                  | .                  | .         | .      | .         | . |
| Vv01g0389    | .                  | .                  | .                  | .         | .      | .         | . |
| .            | .                  | .                  | .                  | .         | .      | Vv14g0759 | . |
|              | Tc04_g014350       | .                  | .                  | .         | .      | .         | . |
| Vv01g0390    | .                  | .                  | .                  | .         | .      | .         | . |
| .            | .                  | .                  | .                  | .         | .      | .         | . |
| Vv01g0391    | .                  | .                  | .                  | .         | .      | .         | . |
| .            | .                  | .                  | .                  | .         | .      | .         | . |
| Vv01g0392    | .                  | .                  | .                  | .         | .      | .         | . |
| .            | .                  | .                  | .                  | .         | .      | .         | . |
| Vv01g0393    | Tc02_g010900       | .                  | .                  | .         | .      | .         | . |
| .            | .                  | .                  | .                  | .         | .      | .         | . |
| .            | .                  | .                  | .                  | .         | .      | .         | . |

|              |              |   |                    |        |           |
|--------------|--------------|---|--------------------|--------|-----------|
| Vv01g0394    | .            | . | Gorai.005G192600.1 | .      | .         |
| .            | .            | . | .                  | .      | .         |
| Vv01g0395    | .            | . | .                  | .      | .         |
| .            | .            | . | .                  | .      | .         |
| Vv01g0396    | .            | . | .                  | .      | .         |
| .            | .            | . | .                  | .      | .         |
| Vv01g0397    | .            | . | .                  | .      | .         |
| .            | .            | . | .                  | .      | .         |
| Vv01g0398    | .            | . | .                  | .      | .         |
| .            | .            | . | .                  | .      | .         |
| Vv01g0399    | Tc02_g024240 | . | .                  | .      | .         |
| .            | .            | . | .                  | .      | .         |
| Vv01g0400    | .            | . | .                  | .      | .         |
| .            | .            | . | .                  | .      | .         |
| Vv01g0401    | .            | . | .                  | .      | .         |
| .            | .            | . | .                  | .      | .         |
| Vv01g0402    | .            | . | .                  | .      | .         |
| .            | .            | . | .                  | .      | .         |
| Vv01g0403    | .            | . | .                  | .      | .         |
| .            | .            | . | .                  | .      | .         |
| Vv01g0404    | .            | . | .                  | .      | .         |
| .            | .            | . | .                  | .      | .         |
| Vv01g0405    | .            | . | Gorai.005G193200.1 | .      | .         |
| .            | .            | . | .                  | .      | .         |
| Vv01g0406    | .            | . | .                  | .      | .         |
| Vv17g0337    | .            | . | .                  | .      | .         |
| .            | .            | . | .                  | .      | .         |
| Vv01g0407    | .            | . | .                  | .      | .         |
| .            | .            | . | .                  | .      | .         |
| Tc04_g013970 | .            | . | .                  | .      | Vv14g0746 |
| Vv01g0408    | .            | . | Gorai.005G193300.1 | .      | .         |
| .            | .            | . | .                  | .      | .         |
| Vv01g0409    | Tc02_g009450 | . | .                  | .      | .         |
| Vv17g0333    | .            | . | Gorai.001G075400.1 | Gorai. | .         |
| 006G059000.1 | .            | . | .                  | .      | .         |
| .            | .            | . | .                  | .      | .         |
| Vv01g0410    | .            | . | Gorai.005G193400.1 | .      | .         |

|                    |           |                    |           |                    |   |           |   |
|--------------------|-----------|--------------------|-----------|--------------------|---|-----------|---|
| .                  | .         | .                  | .         | .                  | . | .         | . |
| .                  | .         | .                  | .         | .                  | . | .         | . |
| Vv01g0411          | .         | .                  | .         | .                  | . | .         | . |
| .                  | .         | .                  | .         | .                  | . | .         | . |
| Vv01g0412          | .         | .                  | .         | .                  | . | .         | . |
| .                  | .         | .                  | .         | .                  | . | .         | . |
| Vv01g0413          | .         | .                  | .         | Gorai.009G348100.1 | . | .         | . |
| .                  | .         | .                  | .         | .                  | . | .         | . |
| Vv01g0414          | .         | .                  | .         | .                  | . | .         | . |
| .                  | .         | .                  | .         | .                  | . | .         | . |
| Vv01g0415          | .         | .                  | .         | Gorai.009G348200.1 | . | .         | . |
| Gorai.012G124000.1 | .         | .                  | Vv17g0325 | .                  | . | .         | . |
| .                  | .         | .                  | .         | .                  | . | .         | . |
| .                  | .         | .                  | .         | .                  | . | .         | . |
| Vv01g0416          | .         | .                  | .         | .                  | . | .         | . |
| .                  | .         | .                  | .         | .                  | . | .         | . |
| Vv01g0417          | .         | .                  | .         | .                  | . | .         | . |
| .                  | .         | .                  | .         | .                  | . | .         | . |
| Vv01g0418          | .         | .                  | .         | Gorai.009G348900.1 | . | .         | . |
| .                  | Vv17g0323 | .                  | .         | Gorai.001G068000.1 | . | .         | . |
| .                  | .         | .                  | .         | .                  | . | .         | . |
| Vv01g0419          | .         | .                  | .         | .                  | . | .         | . |
| .                  | .         | .                  | .         | .                  | . | .         | . |
| Vv01g0420          | .         | .                  | .         | .                  | . | .         | . |
| .                  | .         | .                  | .         | .                  | . | .         | . |
| Vv01g0421          | .         | .                  | .         | .                  | . | .         | . |
| .                  | .         | .                  | .         | .                  | . | Vv14g0736 | . |
| Tc04_g013830       | .         | .                  | .         | .                  | . | .         | . |
| Vv01g0422          | .         | .                  | .         | .                  | . | .         | . |
| Vv17g0322          | .         | Gorai.001G084000.1 | .         | .                  | . | .         | . |
| .                  | .         | .                  | .         | .                  | . | .         | . |
| Vv01g0423          | .         | .                  | .         | .                  | . | .         | . |
| .                  | .         | .                  | .         | .                  | . | .         | . |
| Vv01g0424          | .         | .                  | .         | .                  | . | Gorai.    | . |
| 012G123900.1       | .         | .                  | .         | .                  | . | .         | . |
| .                  | .         | .                  | .         | .                  | . | .         | . |
| Vv01g0425          | .         | .                  | .         | .                  | . | .         | . |
| .                  | .         | .                  | .         | .                  | . | .         | . |
| .                  | .         | .                  | .         | .                  | . | .         | . |
| Vv01g0426          | .         | .                  | .         | .                  | . | .         | . |

|              |              |   |                    |                    |        |   |   |
|--------------|--------------|---|--------------------|--------------------|--------|---|---|
| .            | .            | . | .                  | .                  | .      | . | . |
| .            | .            | . | .                  | .                  | .      | . | . |
| Vv01g0427    | .            | . | Gorai.005G193700.1 | .                  | .      | . | . |
| .            | .            | . | .                  | .                  | .      | . | . |
| Vv14g0732    | .            | . | .                  | .                  | .      | . | . |
| Vv01g0428    | .            | . | .                  | .                  | .      | . | . |
| .            | .            | . | .                  | .                  | .      | . | . |
| Vv01g0429    | .            | . | .                  | .                  | .      | . | . |
| .            | .            | . | .                  | .                  | .      | . | . |
| Vv01g0430    | Tc02_g024250 | . | .                  | .                  | .      | . | . |
| .            | .            | . | .                  | .                  | .      | . | . |
| Vv01g0431    | .            | . | .                  | .                  | .      | . | . |
| .            | .            | . | .                  | .                  | .      | . | . |
| Vv01g0432    | Tc02_g024420 | . | .                  | Gorai.009G343100.1 | .      | . | . |
| .            | .            | . | .                  | .                  | .      | . | . |
| Vv01g0433    | .            | . | .                  | .                  | .      | . | . |
| Vv17g0318    | .            | . | .                  | .                  | Gorai. | . | . |
| 006G193600.1 | .            | . | .                  | .                  | .      | . | . |
| Vv01g0434    | .            | . | .                  | .                  | .      | . | . |
| Vv17g0317    | .            | . | .                  | .                  | .      | . | . |
| .            | .            | . | .                  | .                  | .      | . | . |
| Vv01g0435    | Tc02_g017750 | . | .                  | Gorai.009G342900.1 | .      | . | . |
| .            | .            | . | .                  | .                  | .      | . | . |
| Vv01g0436    | Tc02_g017610 | . | .                  | .                  | .      | . | . |
| Vv17g0308    | .            | . | .                  | .                  | .      | . | . |
| Vv08g0040    | .            | . | .                  | .                  | .      | . | . |
| Vv01g0437    | Tc02_g017590 | . | .                  | .                  | .      | . | . |
| Vv17g0307    | .            | . | .                  | .                  | .      | . | . |
| .            | .            | . | .                  | .                  | .      | . | . |
| Vv01g0438    | Tc02_g017580 | . | Gorai.005G194200.1 | .                  | .      | . | . |
| .            | .            | . | .                  | .                  | .      | . | . |
| Vv01g0439    | Tc02_g027740 | . | .                  | Gorai.             | .      | . | . |
| 008G168700.1 | .            | . | .                  | .                  | .      | . | . |
| .            | .            | . | .                  | .                  | .      | . | . |
| Vv01g0440    | .            | . | .                  | .                  | .      | . | . |
| .            | .            | . | .                  | .                  | .      | . | . |
| Vv01g0441    | .            | . | .                  | .                  | .      | . | . |
| .            | .            | . | .                  | .                  | .      | . | . |
| Vv01g0442    | .            | . | Gorai.009G342800.1 | .                  | .      | . | . |
| .            | .            | . | .                  | .                  | .      | . | . |
| .            | .            | . | .                  | .                  | .      | . | . |

|              |              |                    |                    |           |
|--------------|--------------|--------------------|--------------------|-----------|
| Vv01g0443    | Tc02_g024580 | .                  | Gorai.005G179100.1 | .         |
| .            | .            | Vv17g0305          | Tc03_g004720       | .         |
| .            | .            | Vv08g0076          | .                  | .         |
| .            | .            | .                  | .                  | .         |
| Vv01g0444    | .            | .                  | .                  | .         |
| .            | .            | .                  | .                  | .         |
| .            | .            | .                  | .                  | .         |
| Vv01g0445    | Tc02_g024630 | .                  | Gorai.005G178900.1 | .         |
| .            | .            | Vv17g0303          | Tc03_g004730       | .         |
| .            | .            | Vv08g0084          | Tc05_g023190       | .         |
| .            | .            | .                  | .                  | .         |
| Vv01g0446    | .            | .                  | .                  | .         |
| Vv17g0300    | Tc03_g004760 | .                  | .                  | .         |
| Vv08g0088    | Tc05_g023210 | .                  | .                  | .         |
| .            | .            | .                  | .                  | .         |
| Vv01g0447    | .            | .                  | .                  | .         |
| .            | .            | .                  | .                  | Vv08g0096 |
| .            | .            | .                  | .                  | .         |
| Vv01g0448    | .            | .                  | .                  | .         |
| .            | .            | .                  | .                  | .         |
| .            | .            | .                  | .                  | .         |
| Vv01g0449    | .            | .                  | .                  | Gorai.    |
| 012G123700.1 | Vv17g0292    | .                  | .                  | .         |
| .            | .            | .                  | .                  | .         |
| Vv01g0450    | .            | .                  | Gorai.009G341900.1 | .         |
| .            | .            | .                  | .                  | .         |
| Vv08g0110    | Tc05_g023460 | .                  | .                  | .         |
| .            | .            | .                  | .                  | .         |
| Vv01g0451    | .            | .                  | .                  | .         |
| .            | .            | .                  | .                  | .         |
| .            | .            | .                  | .                  | .         |
| Vv01g0452    | .            | .                  | .                  | .         |
| .            | .            | .                  | .                  | .         |
| .            | .            | .                  | .                  | .         |
| Vv01g0453    | .            | .                  | .                  | .         |
| .            | .            | .                  | .                  | .         |
| .            | .            | .                  | .                  | .         |
| Vv01g0454    | .            | .                  | .                  | Gorai.    |
| 012G123600.1 | .            | .                  | .                  | .         |
| .            | .            | .                  | .                  | .         |
| Vv01g0455    | Tc02_g025080 | .                  | Gorai.005G177000.1 | .         |
| .            | .            | .                  | .                  | .         |
| .            | .            | .                  | .                  | .         |
| Vv01g0456    | .            | .                  | Gorai.009G341800.1 | .         |
| .            | .            | .                  | .                  | .         |
| .            | .            | .                  | .                  | .         |
| Vv01g0457    | .            | .                  | .                  | .         |
| Vv014rg0081  | .            | .                  | .                  | .         |
| .            | .            | .                  | .                  | .         |
| Vv01g0458    | .            | Gorai.002G181200.1 | .                  | .         |

|                    |                    |                    |              |                    |   |   |
|--------------------|--------------------|--------------------|--------------|--------------------|---|---|
| .                  | Vv014rg0093        | .                  | .            | .                  | . | . |
| .                  | .                  | .                  | .            | .                  | . | . |
| Vv01g0459          | .                  | Gorai.005G163600.1 | .            | Gorai.             | . | . |
| 009G338800.1       | .                  | .                  | .            | .                  | . | . |
| .                  | .                  | .                  | .            | .                  | . | . |
| Vv01g0460          | .                  | .                  | .            | .                  | . | . |
| .                  | .                  | .                  | .            | .                  | . | . |
| Vv01g0461          | .                  | Gorai.005G163400.1 | .            | .                  | . | . |
| Gorai.008G166100.1 | .                  | .                  | .            | .                  | . | . |
| .                  | .                  | .                  | .            | .                  | . | . |
| Vv01g0462          | .                  | Gorai.002G181100.1 | .            | Gorai.005G163100.1 | . | . |
| .                  | Gorai.008G166200.1 | .                  | .            | Vv014rg0099        | . | . |
| .                  | .                  | .                  | .            | .                  | . | . |
| Vv01g0463          | .                  | Gorai.002G181000.1 | .            | Gorai.005G163000.1 | . | . |
| .                  | .                  | Gorai.012G120900.1 | .            | Vv014rg0104        | . | . |
| .                  | .                  | .                  | .            | .                  | . | . |
| Vv01g0464          | .                  | .                  | .            | .                  | . | . |
| .                  | .                  | .                  | .            | .                  | . | . |
| Vv01g0465          | .                  | Gorai.002G180500.1 | .            | Gorai.005G162900.1 | . | . |
| .                  | .                  | .                  | .            | .                  | . | . |
| .                  | .                  | Vv08g0143          | Tc05_g004750 | .                  | . | . |
| .                  | .                  | .                  | .            | .                  | . | . |
| Vv01g0466          | .                  | .                  | .            | .                  | . | . |
| .                  | .                  | .                  | .            | .                  | . | . |
| Vv01g0467          | Tc02_g027610       | .                  | .            | Gorai.             | . | . |
| 008G166300.1       | Vv014rg0119        | .                  | .            | .                  | . | . |
| .                  | .                  | .                  | .            | .                  | . | . |
| Vv01g0468          | .                  | .                  | .            | .                  | . | . |
| Vv014rg0121        | .                  | .                  | .            | .                  | . | . |
| .                  | .                  | .                  | .            | .                  | . | . |
| Vv01g0469          | .                  | .                  | .            | .                  | . | . |
| .                  | .                  | .                  | .            | .                  | . | . |
| Vv01g0470          | .                  | .                  | .            | .                  | . | . |
| .                  | .                  | .                  | .            | .                  | . | . |
| Vv01g0471          | .                  | .                  | .            | .                  | . | . |
| .                  | .                  | .                  | .            | .                  | . | . |
| Vv01g0472          | .                  | Gorai.005G162700.1 | .            | .                  | . | . |
| .                  | .                  | .                  | .            | .                  | . | . |
| .                  | .                  | .                  | .            | .                  | . | . |

|              |                    |                    |   |        |                    |   |
|--------------|--------------------|--------------------|---|--------|--------------------|---|
| Vv01g0473    | .                  | .                  | . | .      | Gorai.008G166400.1 | . |
| .            | .                  | .                  | . | .      | .                  | . |
| Vv01g0474    | Tc02_g027590       | .                  | . | .      | .                  | . |
| .            | .                  | .                  | . | .      | .                  | . |
| Vv01g0475    | Tc02_g027570       | .                  | . | .      | .                  | . |
| .            | .                  | .                  | . | .      | .                  | . |
| Vv01g0476    | .                  | .                  | . | .      | .                  | . |
| .            | .                  | .                  | . | .      | .                  | . |
| Vv01g0477    | .                  | .                  | . | .      | .                  | . |
| .            | .                  | .                  | . | .      | .                  | . |
| Vv01g0478    | Tc02_g027560       | Gorai.002G180300.1 | . | .      | .                  | . |
| .            | .                  | .                  | . | .      | .                  | . |
| Vv01g0479    | Tc02_g027540       | Gorai.002G180200.1 | . | .      | .                  | . |
| .            | .                  | .                  | . | .      | .                  | . |
| Vv01g0480    | Tc02_g027530       | Gorai.002G180100.1 | . | .      | .                  | . |
| 005G162500.1 | Gorai.008G166500.1 | .                  | . | Gorai. | Vv014rg0144        | . |
| .            | .                  | .                  | . | .      | .                  | . |
| Vv01g0481    | Tc02_g027520       | Gorai.002G180000.1 | . | .      | Gorai.             | . |
| 005G162400.1 | .                  | .                  | . | .      | .                  | . |
| .            | .                  | .                  | . | .      | .                  | . |
| Vv01g0482    | .                  | .                  | . | .      | .                  | . |
| .            | .                  | .                  | . | .      | .                  | . |
| Vv01g0483    | Tc02_g027510       | Gorai.002G179900.1 | . | .      | .                  | . |
| .            | .                  | .                  | . | .      | .                  | . |
| Vv01g0484    | .                  | .                  | . | .      | .                  | . |
| Vv014rg0147  | .                  | .                  | . | .      | .                  | . |
| .            | .                  | .                  | . | .      | .                  | . |
| Vv01g0485    | Tc02_g027390       | Gorai.002G179700.1 | . | .      | .                  | . |
| .            | .                  | .                  | . | .      | .                  | . |
| Vv01g0486    | .                  | .                  | . | .      | .                  | . |
| Vv014rg0183  | .                  | .                  | . | .      | .                  | . |
| Vv12g0901    | .                  | .                  | . | .      | .                  | . |
| Vv01g0487    | Tc02_g027380       | Gorai.005G162300.1 | . | .      | .                  | . |
| .            | .                  | .                  | . | .      | .                  | . |
| Vv01g0488    | Tc02_g027370       | Gorai.002G179300.1 | . | .      | .                  | . |
| .            | .                  | .                  | . | .      | .                  | . |
| .            | .                  | .                  | . | .      | .                  | . |

|                    |                    |                    |                    |   |
|--------------------|--------------------|--------------------|--------------------|---|
| Vv01g0489          | Tc02_g027350       | .                  | Gorai.005G162000.1 | . |
|                    | Gorai.008G166700.1 | .                  | .                  | . |
| .                  | .                  | .                  | .                  | . |
| Vv01g0490          | .                  | .                  | .                  | . |
| .                  | .                  | .                  | .                  | . |
| Vv01g0491          | Tc02_g027340       | Gorai.002G179000.1 | Gorai.             | . |
| 005G161800.1       | .                  | .                  | .                  | . |
| .                  | .                  | .                  | .                  | . |
| Vv01g0492          | Tc02_g027300       | Gorai.002G178800.1 | .                  | . |
| Gorai.009G331300.1 | .                  | .                  | .                  | . |
| .                  | .                  | .                  | .                  | . |
| Vv01g0493          | Tc02_g027290       | .                  | .                  | . |
| .                  | .                  | .                  | .                  | . |
| Vv01g0494          | .                  | Gorai.005G161600.1 | .                  | . |
| .                  | .                  | .                  | .                  | . |
| Vv01g0495          | .                  | .                  | .                  | . |
| .                  | .                  | .                  | .                  | . |
| Vv01g0496          | .                  | .                  | .                  | . |
| .                  | .                  | .                  | .                  | . |
| Vv01g0497          | .                  | .                  | .                  | . |
| .                  | .                  | .                  | .                  | . |
| Vv01g0498          | .                  | .                  | .                  | . |
| .                  | .                  | .                  | .                  | . |
| Vv01g0499          | .                  | .                  | .                  | . |
| .                  | .                  | .                  | .                  | . |
| Vv01g0500          | Tc02_g027270       | .                  | .                  | . |
| .                  | .                  | .                  | .                  | . |
| Vv01g0501          | .                  | Gorai.005G161500.1 | .                  | . |
| .                  | .                  | .                  | .                  | . |
| Vv01g0502          | .                  | .                  | .                  | . |
| .                  | .                  | .                  | .                  | . |
| Vv01g0503          | .                  | .                  | .                  | . |
| .                  | .                  | .                  | .                  | . |
| Vv01g0504          | Tc02_g027260       | Gorai.002G178700.1 | .                  | . |
| .                  | .                  | .                  | .                  | . |



|                    |              |                    |   |                    |   |        |           |   |
|--------------------|--------------|--------------------|---|--------------------|---|--------|-----------|---|
| Vv01g0505          | .            | .                  | . | .                  | . | .      | .         | . |
| .                  | .            | .                  | . | .                  | . | .      | .         | . |
| Vv01g0506          | .            | .                  | . | .                  | . | .      | .         | . |
| .                  | .            | .                  | . | .                  | . | .      | .         | . |
| Vv01g0507          | Tc02_g027240 | .                  | . | .                  | . | .      | .         | . |
| Gorai.012G181200.1 | .            | .                  | . | .                  | . | .      | .         | . |
| .                  | .            | .                  | . | .                  | . | .      | .         | . |
| Vv01g0508          | .            | .                  | . | .                  | . | .      | .         | . |
| .                  | .            | .                  | . | .                  | . | .      | .         | . |
| Vv01g0509          | .            | .                  | . | .                  | . | .      | .         | . |
| .                  | .            | .                  | . | .                  | . | .      | Vv12g0872 | . |
| .                  | .            | .                  | . | .                  | . | .      | .         | . |
| Vv01g0510          | Tc02_g027230 | .                  | . | Gorai.005G161200.1 | . | .      | .         | . |
| .                  | .            | .                  | . | .                  | . | .      | .         | . |
| .                  | .            | .                  | . | .                  | . | .      | .         | . |
| Vv01g0511          | Tc02_g027220 | .                  | . | .                  | . | .      | .         | . |
| .                  | .            | .                  | . | .                  | . | .      | .         | . |
| .                  | .            | .                  | . | .                  | . | .      | .         | . |
| Vv01g0512          | Tc02_g027200 | Gorai.002G178600.1 | . | .                  | . | .      | .         | . |
| Gorai.008G166800.1 | .            | .                  | . | .                  | . | .      | .         | . |
| .                  | .            | .                  | . | .                  | . | .      | .         | . |
| .                  | .            | .                  | . | .                  | . | .      | .         | . |
| Vv01g0513          | Tc02_g027190 | .                  | . | .                  | . | .      | .         | . |
| .                  | .            | .                  | . | .                  | . | .      | .         | . |
| .                  | .            | .                  | . | .                  | . | .      | .         | . |
| Vv01g0514          | Tc02_g027180 | .                  | . | .                  | . | .      | .         | . |
| .                  | .            | .                  | . | .                  | . | .      | .         | . |
| .                  | .            | .                  | . | .                  | . | .      | .         | . |
| Vv01g0515          | Tc02_g027170 | .                  | . | .                  | . | .      | .         | . |
| .                  | .            | .                  | . | .                  | . | .      | .         | . |
| .                  | .            | .                  | . | .                  | . | .      | .         | . |
| Vv01g0516          | Tc02_g027160 | .                  | . | .                  | . | Gorai. | .         | . |
| 008G289800.1       | Vv17g0246    | Tc03_g005580       | . | .                  | . | .      | .         | . |
| .                  | .            | .                  | . | .                  | . | .      | .         | . |
| .                  | .            | .                  | . | .                  | . | .      | .         | . |
| Vv01g0517          | Tc02_g027140 | Gorai.002G178500.1 | . | .                  | . | .      | .         | . |
| Gorai.009G330900.1 | .            | .                  | . | .                  | . | .      | .         | . |
| .                  | .            | .                  | . | .                  | . | .      | .         | . |
| .                  | .            | .                  | . | .                  | . | .      | .         | . |
| Vv01g0518          | .            | .                  | . | .                  | . | .      | .         | . |
| .                  | .            | .                  | . | .                  | . | .      | .         | . |
| .                  | .            | .                  | . | .                  | . | .      | .         | . |
| Vv01g0519          | .            | .                  | . | .                  | . | .      | .         | . |
| .                  | .            | .                  | . | .                  | . | .      | .         | . |
| .                  | .            | .                  | . | .                  | . | .      | .         | . |
| Vv01g0520          | .            | .                  | . | .                  | . | .      | .         | . |

|              |                    |                    |                    |                    |   |
|--------------|--------------------|--------------------|--------------------|--------------------|---|
| Vv17g0243    | .                  | .                  | .                  | Gorai.005G131900.1 | . |
| Vv01g0521    | Tc02_g027060       | .                  | .                  | .                  | . |
| Vv01g0522    | .                  | .                  | .                  | .                  | . |
| Vv01g0523    | .                  | .                  | .                  | .                  | . |
| Vv01g0524    | .                  | .                  | .                  | .                  | . |
| Vv05g0089    | Tc04_g028900       | .                  | Gorai.005G064700.1 | .                  | . |
|              | Gorai.011G197500.1 | .                  | .                  | .                  | . |
| Vv01g0525    | Tc02_g027000       | .                  | Gorai.005G160800.1 | .                  | . |
|              | Vv05g0087          | .                  | Gorai.             | .                  | . |
| 005G064500.1 | Gorai.011G197400.1 | .                  | .                  | .                  | . |
| Vv01g0526    | Tc02_g028660       | .                  | .                  | .                  | . |
|              | Vv05g0083          | .                  | .                  | .                  | . |
| Vv01g0527    | .                  | .                  | .                  | .                  | . |
| Vv05g0080    | Tc04_g028820       | .                  | .                  | .                  | . |
| Vv01g0528    | .                  | .                  | .                  | .                  | . |
| Vv01g0529    | Tc02_g028620       | .                  | .                  | .                  | . |
|              | Vv05g0078          | Tc04_g028790       | Gorai.005G063900.1 | .                  | . |
|              | Gorai.011G197300.1 | .                  | .                  | .                  | . |
| Vv01g0530    | .                  | .                  | .                  | .                  | . |
| Vv01g0531    | .                  | .                  | Gorai.005G160700.1 | .                  | . |
|              | Vv05g0076          | .                  | Gorai.005G063400.1 | .                  | . |
|              | Gorai.011G197200.1 | .                  | .                  | .                  | . |
| Vv01g0532    | .                  | .                  | .                  | .                  | . |
| Vv01g0533    | Tc02_g028610       | .                  | .                  | .                  | . |
|              | Vv05g0074          | .                  | Gorai.005G063300.1 | .                  | . |
|              | Gorai.011G197000.1 | .                  | .                  | .                  | . |
| Vv01g0534    | .                  | .                  | .                  | .                  | . |
| Vv01g0535    | .                  | Gorai.002G178000.1 | .                  | .                  | . |

|                    |                    |                    |                    |                    |
|--------------------|--------------------|--------------------|--------------------|--------------------|
| .                  | Vv05g0071          | .                  | .                  | Gorai.005G063200.1 |
| .                  | Gorai.011G196900.1 | .                  | .                  | .                  |
| Vv01g0536          | .                  | .                  | .                  | .                  |
| .                  | .                  | .                  | .                  | .                  |
| Vv01g0537          | .                  | .                  | .                  | .                  |
| .                  | .                  | .                  | .                  | .                  |
| Vv01g0538          | Tc02_g028590       | Gorai.002G177600.1 | .                  | .                  |
| .                  | Vv05g0069          | Tc04_g028750       | .                  | .                  |
| Gorai.005G062800.1 | .                  | Gorai.011G196800.1 | .                  | .                  |
| .                  | .                  | .                  | .                  | .                  |
| Vv01g0539          | .                  | .                  | .                  | .                  |
| .                  | .                  | .                  | .                  | .                  |
| Vv01g0540          | Tc02_g028580       | .                  | .                  | .                  |
| .                  | .                  | .                  | .                  | .                  |
| Vv01g0541          | Gorai.002G177300.1 | .                  | .                  | .                  |
| .                  | .                  | .                  | .                  | .                  |
| Vv01g0542          | .                  | .                  | Gorai.008G289900.1 | .                  |
| .                  | Vv17g0242          | Tc03_g003550       | .                  | .                  |
| Gorai.005G132000.1 | .                  | .                  | .                  | .                  |
| .                  | .                  | .                  | .                  | .                  |
| Vv01g0543          | .                  | .                  | .                  | .                  |
| .                  | .                  | .                  | .                  | .                  |
| Vv01g0544          | Tc02_g028560       | Gorai.005G160400.1 | .                  | .                  |
| .                  | Gorai.008G290100.1 | Gorai.012G181500.1 | .                  | .                  |
| .                  | .                  | .                  | .                  | .                  |
| Vv01g0545          | .                  | .                  | .                  | .                  |
| .                  | .                  | .                  | .                  | .                  |
| Vv01g0546          | Tc02_g028530       | Gorai.002G177100.1 | .                  | .                  |
| .                  | Gorai.008G167200.1 | .                  | .                  | .                  |
| .                  | .                  | .                  | .                  | .                  |
| Vv01g0547          | Tc02_g028520       | Gorai.002G177000.1 | .                  | .                  |
| .                  | .                  | .                  | .                  | .                  |
| .                  | Vv12g0842          | Tc01_g018470       | Gorai.007G167000.1 | .                  |
| .                  | .                  | .                  | .                  | .                  |
| Vv01g0548          | .                  | .                  | .                  | .                  |
| .                  | .                  | .                  | .                  | .                  |
| .                  | .                  | .                  | .                  | .                  |
| Vv01g0549          | Tc02_g028490       | Gorai.002G176900.1 | .                  | .                  |
| .                  | .                  | .                  | .                  | .                  |
| .                  | .                  | .                  | .                  | .                  |

|              |                    |                    |        |                    |   |   |   |
|--------------|--------------------|--------------------|--------|--------------------|---|---|---|
| Vv01g0550    | .                  | .                  | .      | .                  | . | . | . |
| .            | .                  | .                  | .      | .                  | . | . | . |
| Vv01g0551    | Tc02_g028440       | .                  | .      | .                  | . | . | . |
| .            | .                  | .                  | .      | .                  | . | . | . |
| Vv01g0552    | Gorai.002G176700.1 | .                  | .      | .                  | . | . | . |
| .            | .                  | .                  | .      | .                  | . | . | . |
| Vv01g0553    | .                  | .                  | .      | .                  | . | . | . |
| .            | .                  | .                  | .      | .                  | . | . | . |
| Vv01g0554    | Tc02_g028410       | .                  | .      | Gorai.009G330700.1 | . | . | . |
| .            | Gorai.012G181700.1 | .                  | .      | .                  | . | . | . |
| .            | .                  | .                  | .      | .                  | . | . | . |
| Vv01g0555    | Tc02_g028400       | Gorai.002G176500.1 | .      | .                  | . | . | . |
| .            | .                  | .                  | .      | .                  | . | . | . |
| Vv01g0556    | .                  | .                  | .      | .                  | . | . | . |
| .            | .                  | .                  | .      | .                  | . | . | . |
| Vv01g0557    | Tc02_g028380       | Gorai.002G176300.1 | .      | .                  | . | . | . |
| .            | .                  | .                  | .      | .                  | . | . | . |
| Vv01g0558    | Tc02_g028370       | .                  | .      | Gorai.             | . | . | . |
| 008G167300.1 | .                  | .                  | .      | .                  | . | . | . |
| Vv01g0559    | Tc02_g028360       | Gorai.002G176200.1 | .      | .                  | . | . | . |
| .            | Gorai.012G181800.1 | .                  | .      | .                  | . | . | . |
| .            | .                  | .                  | .      | .                  | . | . | . |
| Vv01g0560    | Tc02_g028350       | Gorai.002G176100.1 | .      | .                  | . | . | . |
| .            | .                  | .                  | .      | .                  | . | . | . |
| Vv01g0561    | .                  | .                  | .      | .                  | . | . | . |
| .            | .                  | .                  | .      | .                  | . | . | . |
| Vv01g0562    | .                  | .                  | .      | .                  | . | . | . |
| .            | .                  | .                  | .      | .                  | . | . | . |
| Vv01g0563    | Tc02_g028340       | Gorai.002G175900.1 | Gorai. | .                  | . | . | . |
| 005G160200.1 | Gorai.008G167500.1 | .                  | .      | .                  | . | . | . |
| .            | .                  | .                  | .      | .                  | . | . | . |
| Vv01g0564    | Tc02_g026800       | .                  | .      | .                  | . | . | . |
| .            | .                  | .                  | .      | .                  | . | . | . |
| Vv01g0565    | Tc02_g028250       | Gorai.002G175600.1 | .      | .                  | . | . | . |
| .            | .                  | .                  | .      | .                  | . | . | . |

|              |              |                    |        |   |
|--------------|--------------|--------------------|--------|---|
| Vv01g0566    | Tc02_g028240 | Gorai.002G175300.1 | .      | . |
| .            | .            | .                  | .      | . |
| Vv01g0567    | .            | .                  | .      | . |
| .            | .            | .                  | .      | . |
| Vv01g0568    | Tc02_g028210 | Gorai.002G175100.1 | .      | . |
| .            | .            | .                  | .      | . |
| Vv01g0569    | .            | .                  | .      | . |
| .            | .            | .                  | .      | . |
| Vv01g0570    | Tc02_g028170 | Gorai.002G174700.1 | .      | . |
| .            | .            | .                  | .      | . |
| Vv01g0571    | .            | .                  | .      | . |
| .            | .            | .                  | .      | . |
| Vv01g0572    | Tc02_g028160 | Gorai.002G174600.1 | .      | . |
| .            | .            | .                  | .      | . |
| Vv01g0573    | .            | .                  | .      | . |
| .            | .            | .                  | .      | . |
| Vv01g0574    | Tc02_g028130 | Gorai.002G174500.1 | Gorai. | . |
| 005G159200.1 | .            | .                  | .      | . |
| .            | .            | .                  | .      | . |
| Vv01g0575    | .            | .                  | .      | . |
| .            | .            | .                  | .      | . |
| Vv01g0576    | .            | .                  | .      | . |
| .            | .            | .                  | .      | . |
| Vv01g0577    | Tc02_g028100 | Gorai.002G174400.1 | .      | . |
| .            | .            | .                  | .      | . |
| Vv01g0578    | Tc02_g028080 | Gorai.002G174200.1 | .      | . |
| .            | .            | .                  | .      | . |
| Vv01g0579    | Tc02_g028070 | Gorai.002G174100.1 | Gorai. | . |
| 005G159100.1 | .            | Vv12g0829          | .      | . |
| .            | .            | .                  | .      | . |
| Vv01g0580    | Tc02_g028060 | Gorai.002G174000.1 | Gorai. | . |
| 005G158900.1 | .            | .                  | .      | . |
| .            | .            | .                  | .      | . |
| Vv01g0581    | Tc02_g028050 | Gorai.002G173700.1 | .      | . |

|                    |                    |                    |           |
|--------------------|--------------------|--------------------|-----------|
| Gorai.009G330500.1 | Gorai.008G291000.1 | .                  | Vv17g0213 |
| Tc03_g006820       | .                  | .                  | .         |
| Vv01g0582          | Tc02_g028040       | Gorai.005G158800.1 | .         |
| .                  | .                  | .                  | .         |
| Vv01g0583          | Tc02_g026770       | .                  | .         |
| .                  | .                  | .                  | .         |
| Vv01g0584          | Tc02_g028030       | Gorai.002G173500.1 | .         |
| .                  | .                  | .                  | .         |
| Vv01g0585          | Tc02_g028020       | Gorai.002G173300.1 | Gorai.    |
| 005G158500.1       | .                  | Gorai.012G181900.1 | .         |
| .                  | .                  | .                  | .         |
| Vv01g0586          | Tc02_g028000       | Gorai.002G173200.1 | .         |
| Gorai.008G167700.1 | .                  | Gorai.012G182000.1 | .         |
| .                  | .                  | .                  | .         |
| Vv01g0587          | .                  | .                  | .         |
| .                  | .                  | .                  | .         |
| Vv01g0588          | Tc02_g027940       | .                  | .         |
| .                  | .                  | .                  | .         |
| Vv01g0589          | Tc02_g027930       | Gorai.002G172700.1 | .         |
| .                  | .                  | .                  | .         |
| Vv01g0590          | Tc02_g027880       | Gorai.002G172600.1 | .         |
| Gorai.008G291200.1 | .                  | Vv17g0189          | .         |
| .                  | Gorai.005G133500.1 | .                  | .         |
| Vv01g0591          | Tc02_g027860       | .                  | .         |
| .                  | .                  | .                  | .         |
| Vv01g0592          | .                  | Gorai.008G168000.1 | .         |
| .                  | .                  | .                  | .         |
| Vv01g0593          | Tc02_g027810       | .                  | .         |
| Gorai.012G182300.1 | .                  | .                  | .         |
| .                  | .                  | .                  | .         |
| Vv01g0594          | Tc02_g027800       | .                  | .         |
| .                  | .                  | .                  | .         |
| Vv01g0595          | Gorai.002G172300.1 | Gorai.             | .         |
| 009G330200.1       | Gorai.008G168200.1 | Gorai.012G182400.1 | .         |
| .                  | .                  | .                  | .         |
| Vv01g0596          | Tc02_g027780       | Gorai.005G157100.1 | .         |

|                    |                    |                    |   |   |   |                    |   |
|--------------------|--------------------|--------------------|---|---|---|--------------------|---|
| .                  | .                  | .                  | . | . | . | .                  | . |
| .                  | .                  | .                  | . | . | . | .                  | . |
| Vv01g0597          | .                  | .                  | . | . | . | .                  | . |
| .                  | .                  | .                  | . | . | . | .                  | . |
| Vv01g0598          | .                  | .                  | . | . | . | .                  | . |
| .                  | .                  | .                  | . | . | . | .                  | . |
| Vv01g0599          | Tc02_g027770       | Gorai.002G172200.1 | . | . | . | Gorai.             | . |
| 005G157000.1       | Gorai.009G333000.1 | .                  | . | . | . | .                  | . |
| .                  | .                  | .                  | . | . | . | .                  | . |
| .                  | .                  | .                  | . | . | . | .                  | . |
| Vv01g0600          | Tc02_g027750       | .                  | . | . | . | .                  | . |
| Gorai.012G182600.1 | .                  | .                  | . | . | . | .                  | . |
| .                  | .                  | .                  | . | . | . | .                  | . |
| Vv01g0601          | Tc02_g027730       | Gorai.002G171800.1 | . | . | . | .                  | . |
| Gorai.009G329800.1 | Gorai.008G168300.1 | Gorai.012G182700.1 | . | . | . | .                  | . |
| .                  | .                  | .                  | . | . | . | .                  | . |
| .                  | .                  | .                  | . | . | . | .                  | . |
| Vv01g0602          | Tc02_g027720       | Gorai.002G171700.1 | . | . | . | .                  | . |
| Gorai.008G168400.1 | .                  | .                  | . | . | . | .                  | . |
| .                  | .                  | .                  | . | . | . | .                  | . |
| .                  | .                  | .                  | . | . | . | .                  | . |
| Vv01g0603          | Tc02_g027700       | Gorai.002G169100.1 | . | . | . | .                  | . |
| Gorai.008G168500.1 | .                  | .                  | . | . | . | .                  | . |
| .                  | .                  | .                  | . | . | . | .                  | . |
| .                  | .                  | .                  | . | . | . | .                  | . |
| Vv01g0604          | .                  | .                  | . | . | . | .                  | . |
| .                  | .                  | .                  | . | . | . | .                  | . |
| .                  | .                  | .                  | . | . | . | .                  | . |
| Vv01g0605          | Tc02_g027650       | .                  | . | . | . | .                  | . |
| Gorai.012G182800.1 | .                  | .                  | . | . | . | .                  | . |
| .                  | .                  | .                  | . | . | . | .                  | . |
| Vv01g0606          | Tc02_g033190       | Gorai.013G086300.1 | . | . | . | Gorai.             | . |
| 005G156900.1       | .                  | .                  | . | . | . | .                  | . |
| .                  | .                  | .                  | . | . | . | .                  | . |
| .                  | .                  | .                  | . | . | . | .                  | . |
| Vv01g0607          | .                  | .                  | . | . | . | .                  | . |
| Vv04g1184          | Tc01_g002610       | .                  | . | . | . | Gorai.007G200700.1 | . |
| Gorai.003G013000.1 | Gorai.011G100700.1 | .                  | . | . | . | .                  | . |
| .                  | .                  | .                  | . | . | . | .                  | . |
| Vv01g0608          | Gorai.013G028900.1 | .                  | . | . | . | .                  | . |
| .                  | .                  | .                  | . | . | . | .                  | . |
| .                  | .                  | .                  | . | . | . | .                  | . |
| Vv01g0609          | .                  | .                  | . | . | . | .                  | . |
| .                  | .                  | .                  | . | . | . | .                  | . |
| .                  | .                  | .                  | . | . | . | .                  | . |
| Vv01g0610          | .                  | .                  | . | . | . | .                  | . |
| .                  | .                  | .                  | . | . | . | .                  | . |
| .                  | .                  | .                  | . | . | . | .                  | . |

|                    |              |                    |                    |        |
|--------------------|--------------|--------------------|--------------------|--------|
| Vv01g0611          | .            | Gorai.013G029000.1 | .                  | .      |
| Gorai.008G296900.1 | .            | .                  | .                  | .      |
| .                  | .            | .                  | .                  | .      |
| .                  | .            | .                  | .                  | .      |
| Vv01g0612          | .            | .                  | .                  | .      |
| Vv04g1170          | .            | .                  | .                  | .      |
| .                  | .            | .                  | .                  | .      |
| Vv01g0613          | .            | Gorai.013G029200.1 | .                  | .      |
| .                  | Vv04g1169    | Tc01_g002740       | .                  | .      |
| .                  | .            | .                  | .                  | .      |
| .                  | .            | .                  | .                  | .      |
| Vv01g0614          | .            | .                  | .                  | .      |
| Vv04g1168          | .            | .                  | .                  | .      |
| .                  | .            | .                  | .                  | .      |
| Vv01g0615          | .            | .                  | .                  | .      |
| .                  | .            | .                  | .                  | .      |
| .                  | .            | .                  | .                  | .      |
| Vv01g0616          | .            | Gorai.013G029300.1 | .                  | .      |
| .                  | Vv04g1166    | Tc01_g002750       | .                  | .      |
| .                  | Vv12g0791    | Tc01_g001380       | .                  | .      |
| .                  | .            | .                  | .                  | .      |
| Vv01g0617          | .            | .                  | .                  | .      |
| Vv04g1164          | .            | .                  | .                  | .      |
| Vv12g0790          | Tc01_g001370 | .                  | .                  | .      |
| Vv01g0618          | .            | Gorai.013G029400.1 | .                  | .      |
| .                  | .            | .                  | .                  | .      |
| .                  | .            | .                  | .                  | .      |
| Vv01g0619          | .            | Gorai.005G183800.1 | .                  | .      |
| .                  | .            | .                  | .                  | .      |
| .                  | .            | .                  | .                  | .      |
| Vv01g0620          | .            | .                  | Gorai.008G225200.1 | .      |
| .                  | .            | .                  | .                  | .      |
| .                  | .            | .                  | .                  | .      |
| Vv01g0621          | .            | Gorai.013G029700.1 | .                  | .      |
| .                  | .            | .                  | .                  | .      |
| .                  | .            | .                  | .                  | .      |
| Vv01g0622          | .            | .                  | .                  | .      |
| .                  | .            | .                  | .                  | .      |
| .                  | .            | .                  | .                  | .      |
| Vv01g0623          | .            | Gorai.013G029800.1 | .                  | Gorai. |
| 009G328400.1       | .            | .                  | .                  | .      |
| .                  | .            | .                  | .                  | .      |
| .                  | .            | .                  | .                  | .      |
| Vv01g0624          | .            | .                  | .                  | .      |
| .                  | .            | .                  | .                  | .      |
| .                  | .            | .                  | .                  | .      |
| Vv01g0625          | .            | .                  | .                  | .      |
| .                  | .            | .                  | .                  | .      |
| .                  | .            | .                  | .                  | .      |
| Vv01g0626          | .            | .                  | .                  | .      |



|                    |                    |                    |              |                    |   |   |   |
|--------------------|--------------------|--------------------|--------------|--------------------|---|---|---|
| .                  | .                  | .                  | .            | .                  | . | . | . |
| .                  | .                  | .                  | .            | .                  | . | . | . |
| Vv01g0627          | .                  | .                  | .            | Gorai.009G325800.1 | . | . | . |
| .                  | .                  | .                  | .            | .                  | . | . | . |
| .                  | .                  | .                  | .            | .                  | . | . | . |
| Vv01g0628          | Tc02_g033580       | .                  | .            | Gorai.009G328600.1 | . | . | . |
| Gorai.008G224700.1 | .                  | .                  | .            | .                  | . | . | . |
| .                  | .                  | .                  | .            | .                  | . | . | . |
| .                  | .                  | .                  | .            | .                  | . | . | . |
| Vv01g0629          | .                  | Gorai.013G029900.1 | .            | .                  | . | . | . |
| .                  | .                  | .                  | .            | .                  | . | . | . |
| .                  | .                  | .                  | .            | .                  | . | . | . |
| Vv01g0630          | .                  | Gorai.013G030000.1 | .            | .                  | . | . | . |
| .                  | .                  | .                  | .            | .                  | . | . | . |
| .                  | .                  | .                  | .            | .                  | . | . | . |
| Vv01g0631          | .                  | .                  | .            | .                  | . | . | . |
| .                  | .                  | .                  | .            | .                  | . | . | . |
| .                  | .                  | .                  | .            | .                  | . | . | . |
| Vv01g0632          | .                  | .                  | .            | .                  | . | . | . |
| .                  | .                  | .                  | .            | .                  | . | . | . |
| .                  | .                  | .                  | .            | .                  | . | . | . |
| Vv01g0633          | .                  | .                  | .            | .                  | . | . | . |
| .                  | .                  | .                  | .            | .                  | . | . | . |
| .                  | .                  | .                  | .            | .                  | . | . | . |
| Vv01g0634          | .                  | .                  | .            | .                  | . | . | . |
| .                  | .                  | .                  | .            | .                  | . | . | . |
| .                  | .                  | .                  | .            | .                  | . | . | . |
| Vv01g0635          | .                  | .                  | .            | .                  | . | . | . |
| .                  | .                  | .                  | .            | .                  | . | . | . |
| .                  | .                  | .                  | .            | .                  | . | . | . |
| Vv01g0636          | .                  | .                  | .            | .                  | . | . | . |
| .                  | .                  | .                  | .            | .                  | . | . | . |
| .                  | .                  | .                  | .            | .                  | . | . | . |
| Vv01g0637          | .                  | Gorai.013G030100.1 | .            | .                  | . | . | . |
| Gorai.008G294400.1 | .                  | Vv04g1129          | Tc01_g003080 | .                  | . | . | . |
| .                  | Gorai.007G202100.1 | Gorai.003G014000.1 | .            | .                  | . | . | . |
| Gorai.011G101500.1 | .                  | .                  | .            | .                  | . | . | . |
| .                  | .                  | .                  | .            | .                  | . | . | . |
| Vv01g0638          | Tc02_g033810       | .                  | .            | .                  | . | . | . |
| .                  | .                  | .                  | .            | .                  | . | . | . |
| .                  | .                  | .                  | .            | .                  | . | . | . |
| Vv01g0639          | .                  | .                  | .            | .                  | . | . | . |
| .                  | .                  | .                  | .            | .                  | . | . | . |
| .                  | .                  | .                  | .            | .                  | . | . | . |
| Vv01g0640          | .                  | Gorai.013G031200.1 | .            | .                  | . | . | . |
| .                  | .                  | .                  | .            | .                  | . | . | . |
| .                  | .                  | .                  | .            | .                  | . | . | . |
| Vv01g0641          | .                  | Gorai.013G031500.1 | .            | .                  | . | . | . |
| .                  | .                  | .                  | .            | .                  | . | . | . |
| .                  | .                  | .                  | .            | .                  | . | . | . |

|                    |           |                    |                    |   |        |   |   |
|--------------------|-----------|--------------------|--------------------|---|--------|---|---|
| Vv01g0642          | .         | .                  | .                  | . | .      | . | . |
| .                  | .         | .                  | .                  | . | .      | . | . |
| Vv01g0643          | .         | Gorai.013G031700.1 | .                  | . | .      | . | . |
| .                  | .         | .                  | .                  | . | .      | . | . |
| Vv01g0644          | .         | .                  | .                  | . | .      | . | . |
| .                  | .         | .                  | .                  | . | .      | . | . |
| Vv01g0645          | .         | .                  | .                  | . | .      | . | . |
| .                  | .         | .                  | .                  | . | .      | . | . |
| Vv01g0646          | .         | Gorai.013G031900.1 | .                  | . | .      | . | . |
| .                  | .         | .                  | .                  | . | .      | . | . |
| Vv01g0647          | .         | Gorai.013G032000.1 | .                  | . | .      | . | . |
| Gorai.008G223600.1 | .         | .                  | .                  | . | .      | . | . |
| .                  | .         | .                  | .                  | . | .      | . | . |
| Vv01g0648          | .         | Gorai.013G032100.1 | .                  | . | .      | . | . |
| Gorai.008G169900.1 | .         | .                  | .                  | . | .      | . | . |
| .                  | .         | .                  | .                  | . | .      | . | . |
| Vv01g0649          | .         | .                  | .                  | . | .      | . | . |
| .                  | .         | .                  | .                  | . | .      | . | . |
| Vv01g0650          | .         | .                  | Gorai.009G328700.1 | . | .      | . | . |
| .                  | .         | .                  | .                  | . | .      | . | . |
| Vv01g0651          | .         | .                  | .                  | . | Gorai. | . | . |
| 012G183700.1       | .         | .                  | .                  | . | .      | . | . |
| .                  | .         | .                  | .                  | . | .      | . | . |
| Vv01g0652          | .         | .                  | .                  | . | .      | . | . |
| .                  | .         | .                  | .                  | . | .      | . | . |
| Vv01g0653          | .         | .                  | .                  | . | .      | . | . |
| .                  | .         | .                  | .                  | . | .      | . | . |
| Vv01g0654          | .         | .                  | Gorai.009G328800.1 | . | .      | . | . |
| Gorai.008G292200.1 | .         | .                  | .                  | . | .      | . | . |
| .                  | .         | .                  | .                  | . | .      | . | . |
| Vv01g0655          | .         | .                  | Gorai.009G329000.1 | . | .      | . | . |
| .                  | .         | .                  | .                  | . | .      | . | . |
| Vv01g0656          | .         | .                  | Gorai.005G153900.1 | . | .      | . | . |
| .                  | Vv12g0754 | .                  | Gorai.007G164400.1 | . | .      | . | . |
| Gorai.001G189600.1 | .         | .                  | .                  | . | .      | . | . |
| .                  | .         | .                  | .                  | . | .      | . | . |
| Vv01g0657          | .         | .                  | .                  | . | .      | . | . |

|                    |                    |                    |                    |   |        |   |   |
|--------------------|--------------------|--------------------|--------------------|---|--------|---|---|
| .                  | .                  | .                  | .                  | . | .      | . | . |
| .                  | .                  | .                  | .                  | . | .      | . | . |
| Vv01g0658          | .                  | .                  | .                  | . | .      | . | . |
| .                  | .                  | .                  | .                  | . | .      | . | . |
| .                  | .                  | .                  | .                  | . | .      | . | . |
| Vv01g0659          | .                  | .                  | .                  | . | .      | . | . |
| .                  | .                  | .                  | .                  | . | .      | . | . |
| .                  | .                  | .                  | .                  | . | .      | . | . |
| Vv01g0660          | .                  | Gorai.002G171300.1 | .                  | . | Gorai. | . | . |
| 009G329100.1       | .                  | .                  | .                  | . | .      | . | . |
| .                  | .                  | .                  | .                  | . | .      | . | . |
| .                  | .                  | .                  | .                  | . | .      | . | . |
| Vv01g0661          | .                  | Gorai.002G171200.1 | .                  | . | .      | . | . |
| Gorai.008G220500.1 | .                  | .                  | .                  | . | .      | . | . |
| .                  | .                  | .                  | .                  | . | .      | . | . |
| .                  | .                  | .                  | .                  | . | .      | . | . |
| Vv01g0662          | .                  | .                  | .                  | . | .      | . | . |
| .                  | .                  | .                  | .                  | . | .      | . | . |
| .                  | .                  | .                  | .                  | . | .      | . | . |
| Vv01g0663          | .                  | .                  | .                  | . | .      | . | . |
| .                  | .                  | .                  | .                  | . | .      | . | . |
| .                  | .                  | .                  | .                  | . | .      | . | . |
| Vv01g0664          | .                  | .                  | .                  | . | .      | . | . |
| Vv14g0658          | .                  | .                  | .                  | . | .      | . | . |
| .                  | .                  | .                  | .                  | . | .      | . | . |
| Vv01g0665          | .                  | .                  | .                  | . | .      | . | . |
| .                  | .                  | .                  | .                  | . | .      | . | . |
| .                  | .                  | .                  | .                  | . | .      | . | . |
| Vv01g0666          | .                  | Gorai.002G171100.1 | .                  | . | Gorai. | . | . |
| 009G329200.1       | Gorai.008G293000.1 | .                  | .                  | . | .      | . | . |
| .                  | .                  | .                  | .                  | . | .      | . | . |
| .                  | .                  | .                  | .                  | . | .      | . | . |
| Vv01g0667          | .                  | .                  | .                  | . | .      | . | . |
| .                  | .                  | .                  | .                  | . | .      | . | . |
| .                  | .                  | .                  | .                  | . | .      | . | . |
| Vv01g0668          | .                  | Gorai.005G186700.1 | .                  | . | .      | . | . |
| Gorai.008G171500.1 | .                  | .                  | .                  | . | .      | . | . |
| .                  | .                  | .                  | .                  | . | .      | . | . |
| .                  | .                  | .                  | .                  | . | .      | . | . |
| Vv01g0669          | .                  | .                  | .                  | . | .      | . | . |
| .                  | .                  | .                  | .                  | . | .      | . | . |
| .                  | .                  | .                  | .                  | . | .      | . | . |
| Vv01g0670          | .                  | Gorai.002G170900.1 | Gorai.005G186800.1 | . | .      | . | . |
| .                  | .                  | .                  | .                  | . | .      | . | . |
| .                  | .                  | .                  | .                  | . | .      | . | . |
| .                  | .                  | .                  | .                  | . | .      | . | . |
| Vv01g0671          | .                  | .                  | .                  | . | .      | . | . |
| .                  | .                  | .                  | .                  | . | .      | . | . |
| .                  | .                  | .                  | .                  | . | .      | . | . |
| Vv01g0672          | .                  | Gorai.005G186900.1 | .                  | . | .      | . | . |

|                    |                    |                    |
|--------------------|--------------------|--------------------|
| Gorai.007G282000.1 | Vv14g0622          | Gorai.013G121000.1 |
| Vv01g0673          |                    |                    |
| Vv01g0674          | Gorai.002G170700.1 | Gorai.005G187000.1 |
| Gorai.007G282100.1 | Vv14g0620          |                    |
| Vv01g0675          |                    |                    |
| Vv14g0617          | Tc04_g024410       | Gorai.007G282500.1 |
| Vv01g0676          | Gorai.002G170600.1 | Gorai.005G187000.1 |
| Gorai.007G282900.1 | Vv14g0614          | Tc04_g024400       |
| Vv01g0677          |                    | Gorai.005G186900.1 |
| Vv14g0612          |                    | Gorai.007G283000.1 |
| Vv01g0678          |                    | Gorai.005G186800.1 |
| 007G283200.1       | Vv14g0611          | Tc04_g024390       |
| Vv01g0679          |                    | Gorai.005G186700.1 |
| 007G283400.1       | Vv14g0609          | Tc04_g024380       |
| Vv01g0680          |                    |                    |
| Vv01g0681          | Tc02_g007920       | Gorai.002G170500.1 |
| Gorai.009G329300.1 |                    | Vv12g0740          |
| Gorai.007G163300.1 | Gorai.001G225600.1 |                    |
| Gorai.001G100100.1 |                    |                    |
| Vv01g0682          |                    |                    |
| Vv01g0683          | Gorai.002G170400.1 |                    |
| Gorai.008G291400.1 | Vv17g1166          |                    |
| Vv01g0684          |                    |                    |
| Vv01g0685          | Gorai.002G170200.1 |                    |

|                    |              |                    |   |   |                    |   |
|--------------------|--------------|--------------------|---|---|--------------------|---|
| Vv01g0686          | .            | .                  | . | . | Gorai.008G293200.1 | . |
| .                  | .            | .                  | . | . | .                  | . |
| Vv01g0687          | .            | .                  | . | . | .                  | . |
| .                  | .            | .                  | . | . | .                  | . |
| Vv01g0688          | .            | Gorai.002G169900.1 | . | . | .                  | . |
| .                  | .            | .                  | . | . | .                  | . |
| Vv01g0689          | .            | .                  | . | . | .                  | . |
| .                  | .            | .                  | . | . | .                  | . |
| Vv01g0690          | .            | .                  | . | . | .                  | . |
| .                  | .            | .                  | . | . | .                  | . |
| Vv01g0691          | Tc02_g007490 | .                  | . | . | .                  | . |
| .                  | .            | .                  | . | . | .                  | . |
| Vv01g0692          | .            | .                  | . | . | .                  | . |
| .                  | .            | .                  | . | . | .                  | . |
| Vv01g0693          | .            | .                  | . | . | .                  | . |
| .                  | .            | .                  | . | . | .                  | . |
| Vv01g0694          | .            | .                  | . | . | .                  | . |
| .                  | .            | .                  | . | . | .                  | . |
| Vv01g0695          | .            | .                  | . | . | .                  | . |
| .                  | .            | .                  | . | . | .                  | . |
| Vv01g0696          | .            | .                  | . | . | .                  | . |
| .                  | .            | .                  | . | . | .                  | . |
| Vv01g0697          | Tc02_g025980 | Gorai.002G169300.1 | . | . | .                  | . |
| Gorai.009G329400.1 | .            | Vv17g1136          | . | . | .                  | . |
| .                  | .            | .                  | . | . | .                  | . |
| Vv01g0698          | .            | .                  | . | . | .                  | . |
| .                  | .            | .                  | . | . | .                  | . |
| Vv01g0699          | .            | .                  | . | . | .                  | . |
| .                  | .            | .                  | . | . | .                  | . |
| Vv01g0700          | .            | Gorai.002G166300.1 | . | . | .                  | . |
| Gorai.008G294300.1 | .            | .                  | . | . | .                  | . |
| .                  | .            | .                  | . | . | .                  | . |
| Vv01g0701          | .            | .                  | . | . | .                  | . |
| .                  | .            | .                  | . | . | .                  | . |



|                    |                    |                    |   |        |   |
|--------------------|--------------------|--------------------|---|--------|---|
| Vv01g0717          | Tc02_g025690       | .                  | . | .      | . |
| Gorai.012G173800.1 | .                  | .                  | . | .      | . |
| Vv01g0718          | Tc02_g025610       | Gorai.002G189400.1 | . | Gorai. | . |
| 005G174800.1       | Gorai.008G162200.1 | .                  | . | .      | . |
| .                  | .                  | .                  | . | .      | . |
| Vv01g0719          | .                  | .                  | . | .      | . |
| .                  | .                  | .                  | . | .      | . |
| Vv01g0720          | Tc02_g025600       | .                  | . | .      | . |
| .                  | .                  | .                  | . | .      | . |
| Vv01g0721          | .                  | Gorai.005G174900.1 | . | .      | . |
| .                  | .                  | .                  | . | .      | . |
| Vv01g0722          | Tc02_g025590       | .                  | . | Gorai. | . |
| 008G288600.1       | .                  | .                  | . | .      | . |
| Vv01g0723          | Tc02_g025580       | .                  | . | Gorai. | . |
| 008G286100.1       | .                  | .                  | . | .      | . |
| Vv01g0724          | .                  | .                  | . | .      | . |
| .                  | .                  | .                  | . | .      | . |
| Vv01g0725          | Tc02_g025570       | Gorai.005G175000.1 | . | .      | . |
| Gorai.008G162000.1 | .                  | Vv14g1271          | . | .      | . |
| .                  | .                  | .                  | . | .      | . |
| Vv01g0726          | Tc02_g025520       | .                  | . | Gorai. | . |
| 008G161800.1       | Vv17g1093          | Tc03_g013960       | . | .      | . |
| .                  | Gorai.008G203800.1 | .                  | . | .      | . |
| Vv01g0727          | Tc02_g025510       | Gorai.002G189100.1 | . | .      | . |
| Gorai.008G161700.1 | .                  | .                  | . | .      | . |
| .                  | .                  | .                  | . | .      | . |
| Vv01g0728          | Tc02_g025500       | Gorai.002G188900.1 | . | .      | . |
| .                  | .                  | .                  | . | .      | . |
| Vv01g0729          | Tc02_g025470       | Gorai.002G188800.1 | . | Gorai. | . |
| 005G186600.1       | .                  | .                  | . | .      | . |
| .                  | .                  | .                  | . | .      | . |
| Vv01g0730          | Tc02_g025410       | Gorai.005G183600.1 | . | .      | . |
| .                  | .                  | .                  | . | .      | . |
| .                  | Vv14g1276          | Gorai.011G093700.1 | . | .      | . |
| .                  | .                  | .                  | . | .      | . |
| Vv01g0731          | Tc02_g025400       | Gorai.005G175200.1 | . | .      | . |

|                    |                    |                    |                    |   |
|--------------------|--------------------|--------------------|--------------------|---|
|                    | .                  | Vv17g1083          | Tc03_g013840       | . |
|                    | Gorai.007G041500.1 | .                  | Vv14g1279          | . |
| Vv01g0732          | .                  | .                  | Gorai.005G175300.1 | . |
|                    | Vv14g1281          | .                  | .                  | . |
| Gorai.012G066300.1 | .                  | .                  | .                  | . |
| Vv01g0733          | Tc02_g025380       | .                  | Gorai.005G175500.1 | . |
| Vv01g0734          | .                  | .                  | .                  | . |
| Vv01g0735          | Tc02_g025370       | Gorai.002G188600.1 | .                  | . |
|                    | Gorai.012G173600.1 | .                  | .                  | . |
| Vv01g0736          | Tc02_g025330       | .                  | .                  | . |
| Gorai.012G173500.1 | .                  | .                  | .                  | . |
| Vv01g0737          | Tc02_g025310       | .                  | Gorai.005G175700.1 | . |
| Gorai.009G335200.1 | .                  | .                  | Vv17g1077          | . |
| Tc03_g013760       | .                  | .                  | Gorai.008G202700.1 | . |
| Vv14g1306          | .                  | .                  | Gorai.             | . |
| 006G034900.1       | .                  | .                  | .                  | . |
| Vv01g0738          | .                  | .                  | .                  | . |
| Vv01g0739          | Tc02_g025290       | .                  | Gorai.005G175900.1 | . |
| Vv01g0740          | .                  | .                  | .                  | . |
| Vv01g0741          | Tc02_g025280       | .                  | .                  | . |
| Vv01g0742          | .                  | .                  | .                  | . |
| Vv01g0743          | .                  | .                  | .                  | . |
| Vv01g0744          | .                  | .                  | .                  | . |
| Vv01g0745          | .                  | .                  | .                  | . |
| Vv01g0746          | Tc02_g025270       | .                  | Gorai.005G176000.1 | . |



|              |                    |                    |                    |        |   |   |   |
|--------------|--------------------|--------------------|--------------------|--------|---|---|---|
| .            | .                  | .                  | .                  | .      | . | . | . |
| .            | .                  | .                  | .                  | .      | . | . | . |
| Vv01g0747    | .                  | .                  | .                  | .      | . | . | . |
| Vv17g1058    | Tc03_g013680       | Gorai.001G063800.1 | .                  | .      | . | . | . |
| .            | .                  | .                  | .                  | .      | . | . | . |
| .            | .                  | .                  | .                  | .      | . | . | . |
| Vv01g0748    | Tc02_g025260       | .                  | Gorai.005G176100.1 | .      | . | . | . |
|              | Gorai.008G161500.1 | .                  | .                  | .      | . | . | . |
| .            | .                  | .                  | .                  | .      | . | . | . |
| .            | .                  | .                  | .                  | .      | . | . | . |
| Vv01g0749    | .                  | .                  | .                  | .      | . | . | . |
| .            | .                  | .                  | .                  | .      | . | . | . |
| .            | .                  | .                  | .                  | .      | . | . | . |
| Vv01g0750    | .                  | .                  | .                  | .      | . | . | . |
| .            | .                  | .                  | .                  | .      | . | . | . |
| .            | .                  | .                  | .                  | .      | . | . | . |
| Vv01g0751    | Tc02_g025240       | .                  | .                  | .      | . | . | . |
| .            | .                  | .                  | .                  | .      | . | . | . |
| .            | .                  | .                  | .                  | .      | . | . | . |
| Vv01g0752    | Tc02_g025220       | .                  | Gorai.005G176400.1 | .      | . | . | . |
| .            | Gorai.012G173300.1 | .                  | .                  | .      | . | . | . |
| .            | .                  | .                  | .                  | .      | . | . | . |
| .            | .                  | .                  | .                  | .      | . | . | . |
| Vv01g0753    | Tc02_g025190       | Gorai.002G188400.1 | Gorai.             | .      | . | . | . |
| 005G176500.1 | .                  | .                  | .                  | .      | . | . | . |
| .            | .                  | Vv14g1398          | Tc04_g000990       | .      | . | . | . |
|              | Gorai.001G262500.1 | .                  | .                  | .      | . | . | . |
| Vv01g0754    | Tc02_g025170       | .                  | .                  | .      | . | . | . |
| .            | .                  | .                  | .                  | .      | . | . | . |
| .            | .                  | .                  | .                  | .      | . | . | . |
| Vv01g0755    | .                  | Gorai.002G188300.1 | .                  | .      | . | . | . |
| .            | .                  | .                  | .                  | .      | . | . | . |
| .            | .                  | .                  | .                  | .      | . | . | . |
| Vv01g0756    | .                  | .                  | .                  | .      | . | . | . |
| .            | .                  | .                  | .                  | .      | . | . | . |
| .            | .                  | .                  | .                  | .      | . | . | . |
| Vv01g0757    | Tc02_g025160       | .                  | .                  | Gorai. | . | . | . |
| 008G161400.1 | Gorai.012G173200.1 | .                  | .                  | .      | . | . | . |
| .            | .                  | .                  | .                  | .      | . | . | . |
| .            | .                  | .                  | .                  | .      | . | . | . |
| Vv01g0758    | Tc02_g025150       | .                  | Gorai.005G176600.1 | .      | . | . | . |
| .            | .                  | .                  | .                  | .      | . | . | . |
| .            | .                  | .                  | .                  | .      | . | . | . |
| Vv01g0759    | .                  | Gorai.002G216000.1 | .                  | .      | . | . | . |
| .            | .                  | .                  | .                  | .      | . | . | . |
| .            | .                  | .                  | .                  | .      | . | . | . |
| Vv01g0760    | .                  | .                  | .                  | .      | . | . | . |
| .            | .                  | .                  | .                  | .      | . | . | . |
| .            | .                  | .                  | .                  | .      | . | . | . |
| Vv01g0761    | .                  | .                  | .                  | .      | . | . | . |

|              |                    |                    |   |                    |        |   |   |
|--------------|--------------------|--------------------|---|--------------------|--------|---|---|
| .            | .                  | .                  | . | .                  | .      | . | . |
| .            | .                  | .                  | . | .                  | .      | . | . |
| Vv01g0762    | .                  | .                  | . | .                  | .      | . | . |
| .            | .                  | .                  | . | .                  | .      | . | . |
| .            | .                  | .                  | . | .                  | .      | . | . |
| Vv01g0763    | Tc02_g025140       | .                  | . | Gorai.009G335400.1 | .      | . | . |
| .            | Vv17g1055          | .                  | . | Tc03_g013600       | Gorai. | . | . |
| 001G064000.1 | .                  | .                  | . | .                  | .      | . | . |
| .            | .                  | .                  | . | .                  | .      | . | . |
| Vv01g0764    | Tc02_g025130       | Gorai.002G188100.1 | . | Gorai.             | .      | . | . |
| 005G176700.1 | .                  | .                  | . | .                  | .      | . | . |
| .            | .                  | .                  | . | .                  | .      | . | . |
| .            | .                  | .                  | . | .                  | .      | . | . |
| Vv01g0765    | Tc02_g025120       | .                  | . | .                  | .      | . | . |
| .            | .                  | .                  | . | .                  | .      | . | . |
| .            | .                  | .                  | . | .                  | .      | . | . |
| Vv01g0766    | Tc02_g025110       | .                  | . | Gorai.005G176800.1 | .      | . | . |
| .            | .                  | .                  | . | .                  | .      | . | . |
| .            | .                  | .                  | . | .                  | .      | . | . |
| Vv01g0767    | Tc02_g025100       | .                  | . | Gorai.005G176900.1 | .      | . | . |
| .            | .                  | .                  | . | .                  | .      | . | . |
| .            | .                  | .                  | . | .                  | .      | . | . |
| Vv01g0768    | .                  | .                  | . | .                  | .      | . | . |
| .            | .                  | .                  | . | .                  | .      | . | . |
| .            | .                  | .                  | . | .                  | .      | . | . |
| Vv01g0769    | Tc02_g025080       | .                  | . | Gorai.005G177000.1 | .      | . | . |
| .            | .                  | .                  | . | .                  | .      | . | . |
| .            | .                  | .                  | . | .                  | .      | . | . |
| Vv01g0770    | Tc02_g025050       | .                  | . | Gorai.005G177200.1 | .      | . | . |
| .            | Vv17g1048          | .                  | . | Tc03_g013560       | Gorai. | . | . |
| 001G064200.1 | .                  | Gorai.008G201900.1 | . | .                  | .      | . | . |
| .            | .                  | .                  | . | .                  | .      | . | . |
| Vv01g0771    | Tc02_g025040       | .                  | . | .                  | .      | . | . |
| .            | .                  | .                  | . | .                  | .      | . | . |
| .            | .                  | .                  | . | .                  | .      | . | . |
| Vv01g0772    | Tc02_g024990       | .                  | . | Gorai.005G177300.1 | .      | . | . |
| .            | .                  | .                  | . | .                  | .      | . | . |
| .            | .                  | .                  | . | .                  | .      | . | . |
| Vv01g0773    | .                  | .                  | . | .                  | .      | . | . |
| .            | .                  | .                  | . | .                  | .      | . | . |
| .            | .                  | .                  | . | .                  | .      | . | . |
| Vv01g0774    | Tc02_g024980       | .                  | . | Gorai.005G177400.1 | .      | . | . |
| .            | Gorai.008G161300.1 | .                  | . | Vv14g1308          | .      | . | . |
| Tc04_g001980 | Gorai.011G094500.1 | .                  | . | Gorai.001G266300.1 | .      | . | . |
| .            | Gorai.012G065300.1 | .                  | . | .                  | .      | . | . |
| .            | .                  | .                  | . | .                  | .      | . | . |
| Vv01g0775    | Tc02_g024970       | Gorai.002G187900.1 | . | .                  | .      | . | . |
| .            | .                  | .                  | . | .                  | .      | . | . |
| .            | .                  | .                  | . | .                  | .      | . | . |
| Vv01g0776    | .                  | .                  | . | .                  | .      | . | . |

|                    |                    |                    |                    |
|--------------------|--------------------|--------------------|--------------------|
| Vv01g0777          | Tc02_g024950       | Gorai.002G187800.1 | .                  |
| Gorai.009G335700.1 | Gorai.008G161200.1 | .                  | Vv14g1312          |
| Tc04_g001940       | .                  | .                  | Gorai.006G034700.1 |
| Gorai.012G065000.1 | .                  | .                  | .                  |
| Vv01g0778          | .                  | .                  | .                  |
| Vv01g0779          | Gorai.002G167200.1 | .                  | .                  |
| Gorai.008G161100.1 | .                  | .                  | .                  |
| Vv01g0780          | .                  | .                  | .                  |
| Vv01g0781          | Tc02_g023430       | Gorai.005G182800.1 | .                  |
| Vv01g0782          | .                  | .                  | .                  |
| Vv01g0783          | Tc02_g023420       | .                  | Gorai.             |
| 008G158700.1       | .                  | .                  | .                  |
| Vv01g0784          | .                  | .                  | .                  |
| Vv01g0785          | Tc02_g023410       | Gorai.005G182900.1 | .                  |
| .                  | Vv14g1418          | Tc04_g000830       | .                  |
| Vv01g0786          | Tc02_g023390       | .                  | .                  |
| Gorai.012G171400.1 | .                  | .                  | .                  |
| Vv01g0787          | .                  | .                  | .                  |
| Vv01g0788          | .                  | .                  | .                  |
| Vv01g0789          | .                  | .                  | .                  |
| Vv01g0790          | Tc02_g023370       | Gorai.005G183000.1 | .                  |
| Vv01g0791          | Tc02_g000580       | .                  | .                  |
| Vv14g1425          | Tc04_g000760       | .                  | .                  |

|                                 |                    |                    |                    |   |                    |   |
|---------------------------------|--------------------|--------------------|--------------------|---|--------------------|---|
| Gorai.006G029600.1              | .                  | .                  | .                  | . | .                  | . |
| Vv01g0792                       | .                  | .                  | .                  | . | Gorai.008G158600.1 | . |
| Vv01g0793                       | .                  | .                  | .                  | . | .                  | . |
| Vv01g0794                       | Tc02_g023320       | .                  | .                  | . | .                  | . |
| Vv01g0795                       | .                  | .                  | Gorai.005G183200.1 | . | .                  | . |
| Vv01g0796<br>009G337400.1       | .                  | Gorai.002G213300.1 | .                  | . | Gorai.             | . |
| Vv01g0797<br>Gorai.008G158500.1 | .                  | .                  | Gorai.005G183300.1 | . | .                  | . |
| Vv01g0798                       | .                  | .                  | .                  | . | .                  | . |
| Vv01g0799                       | .                  | .                  | .                  | . | .                  | . |
| Vv01g0800                       | .                  | .                  | .                  | . | Gorai.008G155700.1 | . |
|                                 | Vv17g0896          | Tc03_g000920       | .                  | . | .                  | . |
|                                 | Gorai.008G158500.1 | Vv14g1435          | .                  | . | .                  | . |
| Tc04_g000710                    | .                  | Gorai.001G261100.1 | .                  | . | .                  | . |
| Vv01g0801                       | .                  | Gorai.005G183400.1 | .                  | . | .                  | . |
| Vv01g0802                       | .                  | Gorai.005G183500.1 | .                  | . | .                  | . |
|                                 | Vv17g0893          | Tc03_g000880       | Gorai.001G068600.1 | . | .                  | . |
| Vv01g0803                       | .                  | .                  | .                  | . | .                  | . |
| Vv01g0804                       | .                  | Gorai.002G165700.1 | Gorai.005G183600.1 | . | .                  | . |
| Vv01g0805                       | Tc02_g000600       | Gorai.002G213100.1 | .                  | . | .                  | . |
|                                 | Gorai.012G171200.1 | .                  | .                  | . | .                  | . |
|                                 | .                  | Vv14g1439          | Tc04_g000670       | . | .                  | . |
|                                 | Gorai.006G029100.1 | Gorai.012G060500.1 | .                  | . | .                  | . |

|                    |              |                    |                    |        |
|--------------------|--------------|--------------------|--------------------|--------|
| Vv01g0806          | .            | Gorai.002G213000.1 | .                  | Gorai. |
| 009G343300.1       | .            | .                  | .                  | .      |
| .                  | .            | .                  | .                  | .      |
| .                  | .            | .                  | .                  | .      |
| Vv01g0807          | .            | .                  | Gorai.005G183800.1 | .      |
| .                  | Vv17g0891    | .                  | Tc03_g000820       | .      |
| .                  | .            | .                  | .                  | .      |
| .                  | .            | .                  | .                  | .      |
| Vv01g0808          | .            | .                  | .                  | .      |
| Vv17g0882          | Tc03_g000730 | .                  | .                  | .      |
| .                  | .            | .                  | .                  | .      |
| Vv01g0809          | .            | .                  | .                  | .      |
| .                  | .            | .                  | .                  | .      |
| .                  | .            | .                  | .                  | .      |
| Vv01g0810          | .            | .                  | .                  | .      |
| .                  | .            | .                  | .                  | .      |
| .                  | .            | .                  | .                  | .      |
| Vv01g0811          | .            | .                  | .                  | .      |
| .                  | .            | .                  | .                  | .      |
| .                  | .            | .                  | .                  | .      |
| Vv01g0812          | .            | Gorai.002G164400.1 | Gorai.005G183900.1 | .      |
| .                  | .            | .                  | .                  | .      |
| .                  | .            | .                  | .                  | .      |
| .                  | .            | .                  | .                  | .      |
| Vv01g0813          | .            | .                  | .                  | .      |
| .                  | .            | .                  | .                  | .      |
| .                  | .            | .                  | .                  | .      |
| Vv01g0814          | .            | .                  | Gorai.009G343600.1 | .      |
| Gorai.012G171100.1 | .            | .                  | .                  | .      |
| .                  | Vv14g1440    | .                  | Tc04_g000660       | .      |
| Gorai.001G260900.1 | .            | .                  | .                  | .      |
| Vv01g0815          | .            | .                  | .                  | .      |
| .                  | .            | .                  | .                  | .      |
| .                  | .            | .                  | .                  | .      |
| Vv01g0816          | .            | .                  | .                  | .      |
| .                  | .            | .                  | .                  | .      |
| .                  | .            | .                  | .                  | .      |
| Vv01g0817          | .            | .                  | .                  | .      |
| .                  | .            | .                  | .                  | .      |
| .                  | .            | .                  | .                  | .      |
| Vv01g0818          | .            | .                  | .                  | .      |
| .                  | .            | .                  | .                  | .      |
| .                  | .            | .                  | .                  | .      |
| Vv01g0819          | .            | .                  | .                  | .      |
| .                  | .            | .                  | .                  | .      |
| .                  | .            | .                  | .                  | .      |
| Vv01g0820          | .            | .                  | Gorai.005G184200.1 | .      |
| .                  | .            | .                  | .                  | .      |
| .                  | .            | .                  | .                  | .      |
| Vv01g0821          | Tc02_g023300 | .                  | Gorai.005G184300.1 | .      |

|                    |                    |                    |                    |              |   |
|--------------------|--------------------|--------------------|--------------------|--------------|---|
| .                  | .                  | Vv17g0877          | Tc03_g000690       | .            | . |
| .                  | .                  | .                  | Vv14g1446          | Tc04_g000550 | . |
| .                  | .                  | .                  | Gorai.012G060000.1 | .            | . |
| Vv01g0822          | .                  | .                  | .                  | .            | . |
| .                  | .                  | .                  | .                  | .            | . |
| Vv01g0823          | .                  | .                  | .                  | .            | . |
| .                  | .                  | .                  | .                  | .            | . |
| Vv01g0824          | .                  | .                  | .                  | .            | . |
| Vv17g0873          | Tc03_g000650       | .                  | .                  | .            | . |
| Gorai.006G187700.1 | .                  | .                  | .                  | .            | . |
| .                  | .                  | .                  | .                  | .            | . |
| Vv01g0825          | .                  | .                  | .                  | .            | . |
| .                  | .                  | .                  | .                  | .            | . |
| Vv01g0826          | .                  | .                  | .                  | .            | . |
| .                  | .                  | .                  | .                  | .            | . |
| Vv01g0827          | Tc02_g000860       | .                  | .                  | .            | . |
| .                  | .                  | .                  | .                  | .            | . |
| Vv01g0828          | .                  | .                  | .                  | .            | . |
| .                  | .                  | .                  | .                  | .            | . |
| Vv01g0829          | .                  | .                  | .                  | .            | . |
| .                  | .                  | .                  | .                  | .            | . |
| Vv01g0830          | .                  | .                  | .                  | .            | . |
| .                  | .                  | .                  | .                  | .            | . |
| Vv01g0831          | .                  | .                  | .                  | .            | . |
| .                  | .                  | .                  | .                  | .            | . |
| Vv01g0832          | Tc02_g023290       | .                  | Gorai.005G184400.1 | .            | . |
| .                  | .                  | Vv04g1448          | .                  | .            | . |
| .                  | .                  | Vv14g1447          | Tc04_g000520       | .            | . |
| .                  | .                  | Gorai.012G059900.1 | .                  | .            | . |
| Vv01g0833          | .                  | .                  | .                  | .            | . |
| Vv04g1446          | .                  | .                  | .                  | .            | . |
| .                  | .                  | .                  | .                  | .            | . |
| Vv01g0834          | .                  | .                  | .                  | .            | . |
| Vv04g1444          | .                  | .                  | .                  | .            | . |
| .                  | .                  | .                  | .                  | .            | . |
| Vv01g0835          | .                  | .                  | .                  | .            | . |
| Vv04g1443          | Tc01_g010770       | Gorai.007G063300.1 | .                  | .            | . |
| .                  | .                  | .                  | .                  | .            | . |
| .                  | .                  | .                  | .                  | .            | . |
| Vv01g0836          | .                  | Gorai.002G164300.1 | Gorai.005G184500.1 | .            | . |
| .                  | Gorai.009G344100.1 | .                  | Vv04g1441          | .            | . |

|                    |  |              |                    |                    |        |  |
|--------------------|--|--------------|--------------------|--------------------|--------|--|
| Vv01g0837          |  |              |                    |                    |        |  |
| Vv01g0838          |  |              | Gorai.005G184600.1 |                    |        |  |
| Vv01g0839          |  |              |                    |                    |        |  |
| Vv01g0840          |  |              | Gorai.005G184900.1 |                    | Gorai. |  |
| 009G344200.1       |  |              |                    |                    |        |  |
| Vv01g0841          |  |              |                    |                    |        |  |
| Vv01g0842          |  |              |                    |                    |        |  |
| Vv17g0862          |  |              |                    |                    | Gorai. |  |
| 006G187800.1       |  |              |                    |                    |        |  |
| Vv01g0843          |  |              |                    |                    |        |  |
| Vv01g0844          |  |              |                    |                    |        |  |
| Vv01g0845          |  |              | Gorai.002G164200.1 |                    |        |  |
| Vv01g0846          |  |              |                    |                    |        |  |
| Vv01g0847          |  |              |                    |                    |        |  |
| Vv01g0848          |  | Tc02_g023090 |                    |                    |        |  |
| Vv01g0849          |  |              |                    |                    |        |  |
| Vv01g0850          |  | Tc02_g023050 |                    | Gorai.005G185700.1 |        |  |
| Gorai.007G077300.1 |  | Vv14g1462    |                    | Tc04_g000390       |        |  |
| Vv01g0851          |  |              |                    |                    |        |  |
| Vv01g0852          |  |              |                    |                    |        |  |

|                    |                    |                    |   |                    |   |        |   |
|--------------------|--------------------|--------------------|---|--------------------|---|--------|---|
| .                  | .                  | .                  | . | .                  | . | .      | . |
| .                  | .                  | .                  | . | .                  | . | .      | . |
| Vv01g0853          | Tc02_g023030       | .                  | . | Gorai.005G185900.1 | . | .      | . |
| .                  | .                  | .                  | . | .                  | . | .      | . |
| Vv01g0854          | .                  | .                  | . | .                  | . | .      | . |
| .                  | .                  | .                  | . | .                  | . | .      | . |
| Vv01g0855          | .                  | .                  | . | .                  | . | Gorai. | . |
| 012G170700.1       | .                  | .                  | . | .                  | . | .      | . |
| .                  | .                  | .                  | . | .                  | . | .      | . |
| Vv01g0856          | .                  | Gorai.002G161300.1 | . | .                  | . | .      | . |
| .                  | .                  | .                  | . | .                  | . | .      | . |
| Vv01g0857          | .                  | .                  | . | .                  | . | .      | . |
| .                  | .                  | .                  | . | .                  | . | .      | . |
| Vv01g0858          | .                  | .                  | . | .                  | . | .      | . |
| .                  | .                  | .                  | . | .                  | . | .      | . |
| Vv01g0859          | .                  | .                  | . | .                  | . | .      | . |
| .                  | .                  | .                  | . | .                  | . | .      | . |
| Vv01g0860          | .                  | .                  | . | .                  | . | .      | . |
| .                  | .                  | .                  | . | .                  | . | .      | . |
| Vv01g0861          | .                  | .                  | . | Gorai.009G344300.1 | . | .      | . |
| Gorai.012G170400.1 | .                  | .                  | . | .                  | . | .      | . |
| .                  | .                  | .                  | . | .                  | . | .      | . |
| Vv01g0862          | .                  | .                  | . | .                  | . | .      | . |
| .                  | .                  | .                  | . | .                  | . | .      | . |
| Vv01g0863          | .                  | .                  | . | .                  | . | .      | . |
| .                  | .                  | .                  | . | .                  | . | .      | . |
| Vv01g0864          | Tc02_g022870       | .                  | . | .                  | . | .      | . |
| Gorai.012G123400.1 | .                  | .                  | . | .                  | . | .      | . |
| .                  | .                  | .                  | . | .                  | . | .      | . |
| Vv01g0865          | .                  | .                  | . | .                  | . | .      | . |
| .                  | .                  | .                  | . | .                  | . | .      | . |
| Vv01g0866          | Tc02_g022840       | .                  | . | Gorai.005G186300.1 | . | .      | . |
| .                  | Gorai.012G123200.1 | .                  | . | .                  | . | .      | . |
| .                  | .                  | .                  | . | .                  | . | .      | . |
| Vv01g0867          | .                  | .                  | . | .                  | . | .      | . |
| .                  | .                  | .                  | . | .                  | . | .      | . |
| .                  | .                  | .                  | . | .                  | . | .      | . |
| Vv01g0868          | .                  | .                  | . | .                  | . | Gorai. | . |



|                    |              |                    |                    |   |   |
|--------------------|--------------|--------------------|--------------------|---|---|
| 012G123100.1       | Vv17g0857    | .                  | .                  | . | . |
| Gorai.008G158300.1 | .            | Vv14g1477          | Tc04_g000310       | . | . |
| .                  | .            | Gorai.006G028100.1 | .                  | . | . |
| Vv01g0869          | .            | .                  | .                  | . | . |
| .                  | .            | .                  | .                  | . | . |
| Vv01g0870          | .            | Gorai.002G159700.1 | Gorai.005G186600.1 | . | . |
| .                  | .            | .                  | .                  | . | . |
| .                  | .            | .                  | .                  | . | . |
| Vv01g0871          | .            | .                  | Gorai.009G345000.1 | . | . |
| .                  | .            | .                  | .                  | . | . |
| Vv14g1481          | .            | .                  | .                  | . | . |
| Gorai.012G058700.1 | .            | .                  | .                  | . | . |
| Vv01g0872          | .            | .                  | .                  | . | . |
| Vv17g0851          | Tc03_g000370 | Gorai.001G071200.1 | .                  | . | . |
| .                  | .            | .                  | .                  | . | . |
| .                  | .            | .                  | .                  | . | . |
| Vv01g0873          | .            | .                  | Gorai.009G345200.1 | . | . |
| .                  | .            | .                  | .                  | . | . |
| .                  | .            | .                  | .                  | . | . |
| Vv01g0874          | .            | Gorai.005G187100.1 | .                  | . | . |
| .                  | .            | .                  | .                  | . | . |
| .                  | .            | .                  | .                  | . | . |
| Vv01g0875          | .            | .                  | .                  | . | . |
| Vv17g0843          | Tc03_g000310 | .                  | .                  | . | . |
| Gorai.006G187400.1 | .            | .                  | .                  | . | . |
| .                  | .            | .                  | .                  | . | . |
| Vv01g0876          | .            | Gorai.005G187300.1 | .                  | . | . |
| .                  | Vv17g0842    | Tc03_g000300       | .                  | . | . |
| .                  | .            | .                  | .                  | . | . |
| .                  | .            | .                  | .                  | . | . |
| Vv01g0877          | .            | Gorai.005G187400.1 | .                  | . | . |
| .                  | .            | .                  | .                  | . | . |
| .                  | .            | .                  | .                  | . | . |
| Vv01g0878          | .            | .                  | .                  | . | . |
| .                  | .            | .                  | .                  | . | . |
| .                  | .            | .                  | .                  | . | . |
| Vv01g0879          | .            | Gorai.005G187600.1 | Gorai.             | . | . |
| 009G345300.1       | .            | .                  | .                  | . | . |
| .                  | .            | .                  | .                  | . | . |
| .                  | .            | .                  | .                  | . | . |
| Vv01g0880          | .            | Gorai.005G187700.1 | Gorai.             | . | . |
| 009G345400.1       | .            | .                  | .                  | . | . |
| .                  | .            | .                  | .                  | . | . |
| .                  | .            | .                  | .                  | . | . |
| Vv01g0881          | .            | .                  | .                  | . | . |
| .                  | .            | .                  | .                  | . | . |
| .                  | .            | .                  | .                  | . | . |
| Vv01g0882          | .            | .                  | Gorai.009G345500.1 | . | . |

|                    |                    |   |                    |                    |   |   |
|--------------------|--------------------|---|--------------------|--------------------|---|---|
| .                  | .                  | . | .                  | .                  | . | . |
| .                  | .                  | . | .                  | .                  | . | . |
| Vv01g0883          | .                  | . | Gorai.005G187800.1 | .                  | . | . |
| .                  | Vv17g0839          | . | .                  | .                  | . | . |
| .                  | .                  | . | .                  | .                  | . | . |
| Vv01g0884          | .                  | . | .                  | .                  | . | . |
| .                  | .                  | . | .                  | .                  | . | . |
| .                  | .                  | . | .                  | .                  | . | . |
| Vv01g0885          | .                  | . | Gorai.005G188000.1 | Gorai.             | . | . |
| 009G345700.1       | .                  | . | Vv17g0832          | Tc03_g000240       | . | . |
| .                  | .                  | . | .                  | .                  | . | . |
| .                  | .                  | . | .                  | .                  | . | . |
| Vv01g0886          | .                  | . | .                  | Gorai.009G345800.1 | . | . |
| .                  | .                  | . | .                  | .                  | . | . |
| .                  | .                  | . | .                  | .                  | . | . |
| Vv01g0887          | .                  | . | .                  | Gorai.009G345900.1 | . | . |
| .                  | .                  | . | .                  | .                  | . | . |
| .                  | .                  | . | .                  | .                  | . | . |
| Vv01g0888          | .                  | . | .                  | .                  | . | . |
| .                  | .                  | . | .                  | .                  | . | . |
| .                  | .                  | . | .                  | .                  | . | . |
| Vv01g0889          | .                  | . | .                  | .                  | . | . |
| .                  | .                  | . | .                  | .                  | . | . |
| .                  | .                  | . | .                  | .                  | . | . |
| Vv01g0890          | .                  | . | .                  | .                  | . | . |
| .                  | .                  | . | .                  | .                  | . | . |
| .                  | .                  | . | .                  | .                  | . | . |
| Vv01g0891          | .                  | . | .                  | Gorai.009G346000.1 | . | . |
| .                  | .                  | . | .                  | .                  | . | . |
| .                  | .                  | . | .                  | .                  | . | . |
| Vv01g0892          | .                  | . | .                  | Gorai.009G346100.1 | . | . |
| Gorai.008G189700.1 | .                  | . | Vv17g0576          | .                  | . | . |
| .                  | Gorai.008G189700.1 | . | .                  | Vv14g1504          | . | . |
| .                  | .                  | . | .                  | .                  | . | . |
| Vv01g0893          | .                  | . | .                  | .                  | . | . |
| .                  | .                  | . | .                  | .                  | . | . |
| .                  | .                  | . | .                  | .                  | . | . |
| Vv01g0894          | .                  | . | .                  | .                  | . | . |
| .                  | .                  | . | .                  | .                  | . | . |
| .                  | .                  | . | .                  | .                  | . | . |
| Vv01g0895          | Tc02_g022680       | . | .                  | Gorai.005G188300.1 | . | . |
| .                  | .                  | . | .                  | .                  | . | . |
| .                  | .                  | . | .                  | .                  | . | . |
| Vv01g0896          | .                  | . | .                  | .                  | . | . |
| .                  | .                  | . | .                  | .                  | . | . |
| .                  | .                  | . | .                  | .                  | . | . |
| Vv01g0897          | .                  | . | .                  | .                  | . | . |
| .                  | .                  | . | .                  | .                  | . | . |
| .                  | .                  | . | .                  | .                  | . | . |
| Vv01g0898          | Tc02_g022640       | . | .                  | Gorai.005G188700.1 | . | . |

|           |                    |                    |   |                    |                    |   |   |
|-----------|--------------------|--------------------|---|--------------------|--------------------|---|---|
| .         | .                  | .                  | . | .                  | .                  | . | . |
| .         | .                  | .                  | . | .                  | .                  | . | . |
| Vv01g0899 | .                  | .                  | . | .                  | .                  | . | . |
| .         | .                  | .                  | . | .                  | .                  | . | . |
| Vv01g0900 | Tc02_g022600       | .                  | . | .                  | Gorai.009G346400.1 | . | . |
| .         | .                  | .                  | . | .                  | .                  | . | . |
| Vv01g0901 | Tc02_g022580       | .                  | . | .                  | Gorai.009G346600.1 | . | . |
| .         | .                  | .                  | . | .                  | .                  | . | . |
| Vv01g0902 | .                  | .                  | . | .                  | .                  | . | . |
| .         | .                  | .                  | . | .                  | .                  | . | . |
| Vv01g0903 | Tc02_g022570       | .                  | . | Gorai.005G188800.1 | .                  | . | . |
| .         | .                  | .                  | . | .                  | .                  | . | . |
| Vv01g0904 | .                  | .                  | . | .                  | .                  | . | . |
| .         | .                  | .                  | . | .                  | .                  | . | . |
| Vv01g0905 | .                  | .                  | . | .                  | .                  | . | . |
| .         | .                  | .                  | . | .                  | .                  | . | . |
| Vv01g0906 | Tc02_g022550       | .                  | . | Gorai.005G188900.1 | .                  | . | . |
| .         | .                  | .                  | . | .                  | .                  | . | . |
| Vv01g0907 | Tc02_g022530       | .                  | . | Gorai.005G189000.1 | .                  | . | . |
| .         | Vv17g0583          | .                  | . | .                  | .                  | . | . |
| .         | .                  | .                  | . | .                  | .                  | . | . |
| Vv01g0908 | Tc02_g022520       | .                  | . | Gorai.005G189100.1 | .                  | . | . |
| .         | .                  | .                  | . | .                  | .                  | . | . |
| Vv01g0909 | .                  | .                  | . | .                  | .                  | . | . |
| .         | .                  | .                  | . | .                  | .                  | . | . |
| Vv01g0910 | Tc02_g022460       | .                  | . | Gorai.005G189200.1 | .                  | . | . |
| .         | .                  | .                  | . | .                  | .                  | . | . |
| Vv01g0911 | .                  | .                  | . | .                  | .                  | . | . |
| .         | .                  | .                  | . | .                  | .                  | . | . |
| .         | Tc04_g007270       | .                  | . | .                  | Vv14g1529          | . | . |
| .         | .                  | .                  | . | .                  | Gorai.006G025900.1 | . | . |
| Vv01g0912 | .                  | .                  | . | .                  | .                  | . | . |
| Vv17g0589 | Tc03_g009010       | .                  | . | .                  | .                  | . | . |
| .         | .                  | .                  | . | .                  | .                  | . | . |
| Vv01g0913 | .                  | Gorai.002G166900.1 | . | .                  | .                  | . | . |
| .         | Gorai.012G121400.1 | .                  | . | .                  | .                  | . | . |
| .         | .                  | .                  | . | .                  | .                  | . | . |
| .         | .                  | .                  | . | .                  | .                  | . | . |

|                    |                    |                    |        |   |   |        |   |
|--------------------|--------------------|--------------------|--------|---|---|--------|---|
| Vv01g0914          | .                  | .                  | .      | . | . | Gorai. | . |
| 012G121100.1       | .                  | .                  | .      | . | . | .      | . |
| Vv01g0915          | Tc02_g022310       | .                  | .      | . | . | .      | . |
| Gorai.012G121000.1 | .                  | .                  | .      | . | . | .      | . |
| Vv01g0916          | .                  | .                  | .      | . | . | Gorai. | . |
| 012G120900.1       | .                  | .                  | .      | . | . | .      | . |
| Vv01g0917          | .                  | .                  | .      | . | . | .      | . |
| .                  | .                  | .                  | .      | . | . | .      | . |
| Vv01g0918          | Tc02_g022230       | Gorai.002G165100.1 | .      | . | . | .      | . |
| .                  | .                  | .                  | .      | . | . | .      | . |
| Vv01g0919          | .                  | .                  | .      | . | . | .      | . |
| .                  | .                  | .                  | .      | . | . | .      | . |
| Vv01g0920          | Tc02_g022220       | Gorai.005G189300.1 | .      | . | . | .      | . |
| .                  | .                  | .                  | .      | . | . | .      | . |
| Vv01g0921          | Tc02_g022210       | .                  | .      | . | . | .      | . |
| .                  | .                  | .                  | .      | . | . | .      | . |
| Vv14g1531          | Tc04_g007300       | .                  | .      | . | . | .      | . |
| Vv01g0922          | Tc02_g022200       | Gorai.002G164600.1 | Gorai. | . | . | .      | . |
| 005G189500.1       | .                  | .                  | .      | . | . | .      | . |
| .                  | .                  | Vv14g1532          | .      | . | . | .      | . |
| .                  | .                  | .                  | .      | . | . | .      | . |
| Vv01g0923          | .                  | .                  | .      | . | . | .      | . |
| .                  | .                  | .                  | .      | . | . | .      | . |
| Vv01g0924          | Tc02_g022190       | .                  | .      | . | . | .      | . |
| .                  | .                  | .                  | .      | . | . | .      | . |
| Vv01g0925          | Tc02_g022150       | Gorai.005G189600.1 | .      | . | . | .      | . |
| .                  | .                  | .                  | .      | . | . | .      | . |
| Vv01g0926          | Tc02_g022140       | Gorai.009G346700.1 | .      | . | . | .      | . |
| .                  | .                  | .                  | .      | . | . | .      | . |
| .                  | Vv14g1540          | Tc04_g016040       | .      | . | . | .      | . |
| Gorai.007G198800.1 | .                  | .                  | .      | . | . | .      | . |
| Vv01g0927          | .                  | Gorai.009G346800.1 | .      | . | . | .      | . |
| .                  | .                  | .                  | .      | . | . | .      | . |
| Vv01g0928          | Gorai.002G162600.1 | .                  | .      | . | . | .      | . |
| .                  | .                  | .                  | .      | . | . | .      | . |
| Vv01g0929          | .                  | .                  | .      | . | . | .      | . |
| .                  | .                  | .                  | .      | . | . | .      | . |
| .                  | .                  | .                  | .      | . | . | .      | . |

|                    |                    |                    |                    |        |   |   |   |
|--------------------|--------------------|--------------------|--------------------|--------|---|---|---|
| Vv01g0930          | .                  | .                  | .                  | .      | . | . | . |
| .                  | .                  | .                  | .                  | .      | . | . | . |
| Vv01g0931          | Tc02_g034200       | .                  | .                  | .      | . | . | . |
| Vv17g0603          | .                  | .                  | .                  | .      | . | . | . |
| .                  | .                  | .                  | .                  | .      | . | . | . |
| Vv01g0932          | .                  | .                  | .                  | .      | . | . | . |
| .                  | .                  | .                  | .                  | .      | . | . | . |
| .                  | .                  | .                  | .                  | .      | . | . | . |
| Vv01g0933          | Tc02_g021900       | .                  | Gorai.005G189700.1 | .      | . | . | . |
| .                  | .                  | .                  | .                  | .      | . | . | . |
| Vv01g0934          | Tc02_g021880       | Gorai.002G159700.1 | .                  | .      | . | . | . |
| .                  | .                  | .                  | .                  | .      | . | . | . |
| Vv01g0935          | .                  | .                  | .                  | .      | . | . | . |
| .                  | .                  | .                  | .                  | .      | . | . | . |
| .                  | .                  | .                  | .                  | .      | . | . | . |
| Vv01g0936          | Tc02_g021830       | .                  | Gorai.009G347000.1 | .      | . | . | . |
| .                  | .                  | .                  | .                  | .      | . | . | . |
| .                  | .                  | .                  | .                  | .      | . | . | . |
| Vv01g0937          | Tc02_g021810       | .                  | Gorai.005G189800.1 | .      | . | . | . |
| Gorai.008G190300.1 | .                  | .                  | Vv17g0615          | .      | . | . | . |
| Tc03_g009540       | Gorai.001G073600.1 | .                  | .                  | Gorai. | . | . | . |
| 008G190300.1       | .                  | .                  | .                  | .      | . | . | . |
| .                  | .                  | .                  | .                  | .      | . | . | . |
| Vv01g0938          | .                  | .                  | .                  | .      | . | . | . |
| .                  | .                  | .                  | .                  | .      | . | . | . |
| .                  | .                  | .                  | .                  | .      | . | . | . |
| Vv01g0939          | .                  | .                  | .                  | .      | . | . | . |
| .                  | .                  | .                  | .                  | .      | . | . | . |
| .                  | .                  | .                  | .                  | .      | . | . | . |
| Vv01g0940          | Tc02_g034120       | .                  | .                  | .      | . | . | . |
| Vv17g0616          | Tc03_g009550       | .                  | .                  | .      | . | . | . |
| .                  | Vv14g1543          | Tc04_g025970       | .                  | .      | . | . | . |
| .                  | .                  | .                  | .                  | .      | . | . | . |
| Vv01g0941          | Tc02_g034110       | .                  | .                  | Gorai. | . | . | . |
| 008G183000.1       | .                  | .                  | .                  | .      | . | . | . |
| .                  | .                  | .                  | .                  | .      | . | . | . |
| Vv01g0942          | Tc02_g034100       | .                  | .                  | .      | . | . | . |
| .                  | .                  | .                  | .                  | .      | . | . | . |
| .                  | .                  | .                  | .                  | .      | . | . | . |
| Vv01g0943          | .                  | .                  | .                  | .      | . | . | . |
| .                  | .                  | .                  | .                  | .      | . | . | . |
| .                  | .                  | .                  | .                  | .      | . | . | . |
| Vv01g0944          | Tc02_g034090       | Gorai.013G077900.1 | .                  | .      | . | . | . |
| Gorai.008G182900.1 | .                  | .                  | .                  | .      | . | . | . |
| .                  | .                  | .                  | .                  | .      | . | . | . |
| .                  | .                  | .                  | .                  | .      | . | . | . |
| Vv01g0945          | Tc02_g034070       | .                  | .                  | .      | . | . | . |

|              |                    |                    |   |   |                    |   |
|--------------|--------------------|--------------------|---|---|--------------------|---|
| .            | .                  | .                  | . | . | .                  | . |
| .            | .                  | .                  | . | . | .                  | . |
| Vv01g0946    | Tc02_g034060       | Gorai.013G077700.1 | . | . | .                  | . |
| .            | .                  | .                  | . | . | .                  | . |
| .            | .                  | .                  | . | . | .                  | . |
| Vv01g0947    | .                  | .                  | . | . | .                  | . |
| .            | .                  | .                  | . | . | .                  | . |
| .            | .                  | .                  | . | . | .                  | . |
| Vv01g0948    | .                  | .                  | . | . | .                  | . |
| .            | .                  | .                  | . | . | .                  | . |
| .            | .                  | .                  | . | . | .                  | . |
| Vv01g0949    | .                  | .                  | . | . | .                  | . |
| .            | .                  | .                  | . | . | .                  | . |
| .            | .                  | .                  | . | . | .                  | . |
| Vv01g0950    | Tc02_g034050       | .                  | . | . | Gorai.             | . |
| 008G182800.1 | Vv17g0620          | Tc03_g009570       | . | . | Gorai.             | . |
| 001G073500.1 | Gorai.008G182800.1 | .                  | . | . | .                  | . |
| .            | .                  | .                  | . | . | .                  | . |
| Vv01g0951    | Tc02_g034040       | .                  | . | . | Gorai.             | . |
| 008G190600.1 | Vv17g0621          | Tc03_g009580       | . | . | .                  | . |
| .            | Gorai.008G182700.1 | Vv14g1551          | . | . | .                  | . |
| .            | .                  | .                  | . | . | .                  | . |
| Vv01g0952    | Tc02_g034030       | .                  | . | . | Gorai.             | . |
| 008G182600.1 | .                  | .                  | . | . | .                  | . |
| .            | .                  | .                  | . | . | .                  | . |
| Vv01g0953    | Tc02_g034020       | .                  | . | . | .                  | . |
| Vv17g0625    | Tc03_g009670       | .                  | . | . | .                  | . |
| .            | Vv14g1554          | .                  | . | . | .                  | . |
| .            | .                  | .                  | . | . | .                  | . |
| Vv01g0954    | .                  | .                  | . | . | .                  | . |
| .            | .                  | .                  | . | . | .                  | . |
| .            | .                  | .                  | . | . | .                  | . |
| Vv01g0955    | Tc02_g034010       | .                  | . | . | Gorai.             | . |
| 008G182500.1 | .                  | .                  | . | . | .                  | . |
| .            | .                  | .                  | . | . | .                  | . |
| Vv01g0956    | .                  | .                  | . | . | Gorai.008G182400.1 | . |
| .            | .                  | .                  | . | . | .                  | . |
| .            | .                  | .                  | . | . | .                  | . |
| Vv01g0957    | .                  | .                  | . | . | .                  | . |
| .            | .                  | .                  | . | . | .                  | . |
| .            | .                  | .                  | . | . | .                  | . |
| Vv01g0958    | Gorai.013G077500.1 | .                  | . | . | .                  | . |
| .            | .                  | .                  | . | . | .                  | . |
| .            | .                  | .                  | . | . | .                  | . |
| Vv01g0959    | Tc02_g033990       | Gorai.013G077400.1 | . | . | .                  | . |
| .            | .                  | .                  | . | . | .                  | . |
| .            | .                  | .                  | . | . | .                  | . |
| Vv01g0960    | .                  | .                  | . | . | .                  | . |
| .            | .                  | .                  | . | . | .                  | . |
| .            | .                  | .                  | . | . | .                  | . |

|                    |                    |                    |                    |   |
|--------------------|--------------------|--------------------|--------------------|---|
| Vv01g0961          | Tc02_g033950       | Gorai.013G074800.1 | .                  | . |
|                    | Gorai.008G191200.1 | Gorai.012G117800.1 | Vv17g0634          |   |
|                    | Tc03_g009820       | .                  | Gorai.008G191200.1 |   |
|                    | Vv14g1562          | .                  | .                  | . |
| .                  | .                  | .                  | .                  | . |
| Vv01g0962          | Tc02_g033940       | Gorai.013G082400.1 | .                  | . |
| .                  | .                  | .                  | .                  | . |
| .                  | .                  | .                  | .                  | . |
| Vv01g0963          | Tc02_g033930       | Gorai.013G082500.1 | .                  | . |
| .                  | .                  | .                  | .                  | . |
| .                  | .                  | .                  | .                  | . |
| Vv01g0964          | Tc02_g033920       | .                  | Gorai.             | . |
| 008G191300.1       | Vv17g0636          | .                  | .                  | . |
|                    | Gorai.008G182300.1 | Vv14g1564          | .                  | . |
| Tc05_g023640       | .                  | .                  | .                  | . |
| Vv01g0965          | Tc02_g033910       | .                  | .                  | . |
| .                  | .                  | .                  | .                  | . |
| .                  | .                  | .                  | .                  | . |
| Vv01g0966          | Tc02_g033900       | Gorai.013G082700.1 | .                  | . |
| Gorai.009G323400.1 | .                  | Vv17g0638          | .                  | . |
| Tc03_g009840       | .                  | .                  | Vv14g1565          | . |
|                    | Tc04_g017560       | .                  | .                  | . |
| Vv01g0967          | .                  | .                  | .                  | . |
| .                  | .                  | .                  | .                  | . |
| .                  | .                  | .                  | .                  | . |
| Vv01g0968          | .                  | .                  | .                  | . |
| .                  | .                  | .                  | .                  | . |
| .                  | .                  | .                  | .                  | . |
| Vv01g0969          | .                  | .                  | .                  | . |
| .                  | .                  | .                  | .                  | . |
| .                  | .                  | .                  | .                  | . |
| Vv01g0970          | .                  | .                  | .                  | . |
| .                  | .                  | .                  | .                  | . |
| .                  | .                  | .                  | .                  | . |
| Vv01g0971          | .                  | .                  | .                  | . |
| .                  | .                  | .                  | .                  | . |
| .                  | .                  | .                  | .                  | . |
| Vv01g0972          | .                  | .                  | .                  | . |
| .                  | .                  | .                  | .                  | . |
| .                  | .                  | .                  | .                  | . |
| Vv01g0973          | .                  | .                  | .                  | . |
| .                  | .                  | .                  | .                  | . |
| .                  | .                  | .                  | .                  | . |
| Vv01g0974          | .                  | .                  | .                  | . |
| .                  | .                  | .                  | .                  | . |
| .                  | .                  | .                  | .                  | . |
| Vv01g0975          | .                  | .                  | .                  | . |
| .                  | .                  | .                  | .                  | . |
| .                  | .                  | .                  | .                  | . |
| Vv01g0976          | .                  | .                  | .                  | . |

|           |   |   |   |   |                    |   |   |
|-----------|---|---|---|---|--------------------|---|---|
| .         | . | . | . | . | .                  | . | . |
| Vv01g0977 | . | . | . | . | Gorai.008G179500.1 | . | . |
| .         | . | . | . | . | .                  | . | . |
| Vv01g0978 | . | . | . | . | .                  | . | . |
| .         | . | . | . | . | .                  | . | . |
| Vv01g0979 | . | . | . | . | .                  | . | . |
| .         | . | . | . | . | .                  | . | . |
| Vv01g0980 | . | . | . | . | .                  | . | . |
| .         | . | . | . | . | .                  | . | . |
| Vv01g0981 | . | . | . | . | .                  | . | . |
| .         | . | . | . | . | .                  | . | . |
| Vv01g0982 | . | . | . | . | .                  | . | . |
| .         | . | . | . | . | .                  | . | . |
| Vv01g0983 | . | . | . | . | .                  | . | . |
| .         | . | . | . | . | .                  | . | . |
| Vv01g0984 | . | . | . | . | .                  | . | . |
| .         | . | . | . | . | .                  | . | . |
| Vv01g0985 | . | . | . | . | .                  | . | . |
| .         | . | . | . | . | .                  | . | . |
| Vv01g0986 | . | . | . | . | .                  | . | . |
| .         | . | . | . | . | .                  | . | . |
| Vv01g0987 | . | . | . | . | .                  | . | . |
| .         | . | . | . | . | .                  | . | . |
| Vv01g0988 | . | . | . | . | .                  | . | . |
| .         | . | . | . | . | .                  | . | . |
| Vv01g0989 | . | . | . | . | .                  | . | . |
| .         | . | . | . | . | .                  | . | . |
| Vv01g0990 | . | . | . | . | .                  | . | . |
| .         | . | . | . | . | .                  | . | . |
| Vv01g0991 | . | . | . | . | .                  | . | . |
| .         | . | . | . | . | .                  | . | . |
| Vv01g0992 | . | . | . | . | .                  | . | . |
| .         | . | . | . | . | .                  | . | . |
| .         | . | . | . | . | .                  | . | . |



|           |   |   |   |   |   |   |   |
|-----------|---|---|---|---|---|---|---|
| Vv01g0993 | . | . | . | . | . | . | . |
| .         | . | . | . | . | . | . | . |
| Vv01g0994 | . | . | . | . | . | . | . |
| .         | . | . | . | . | . | . | . |
| Vv01g0995 | . | . | . | . | . | . | . |
| .         | . | . | . | . | . | . | . |
| Vv01g0996 | . | . | . | . | . | . | . |
| .         | . | . | . | . | . | . | . |
| Vv01g0997 | . | . | . | . | . | . | . |
| .         | . | . | . | . | . | . | . |
| Vv01g0998 | . | . | . | . | . | . | . |
| .         | . | . | . | . | . | . | . |
| Vv01g0999 | . | . | . | . | . | . | . |
| .         | . | . | . | . | . | . | . |
| Vv01g1000 | . | . | . | . | . | . | . |
| .         | . | . | . | . | . | . | . |
| Vv01g1001 | . | . | . | . | . | . | . |
| .         | . | . | . | . | . | . | . |
| Vv01g1002 | . | . | . | . | . | . | . |
| .         | . | . | . | . | . | . | . |
| Vv01g1003 | . | . | . | . | . | . | . |
| .         | . | . | . | . | . | . | . |
| Vv01g1004 | . | . | . | . | . | . | . |
| .         | . | . | . | . | . | . | . |
| Vv01g1005 | . | . | . | . | . | . | . |
| .         | . | . | . | . | . | . | . |
| Vv01g1006 | . | . | . | . | . | . | . |
| .         | . | . | . | . | . | . | . |
| Vv01g1007 | . | . | . | . | . | . | . |
| .         | . | . | . | . | . | . | . |
| Vv01g1008 | . | . | . | . | . | . | . |
| .         | . | . | . | . | . | . | . |
| Vv01g1009 | . | . | . | . | . | . | . |
| .         | . | . | . | . | . | . | . |

|           |              |   |                    |   |
|-----------|--------------|---|--------------------|---|
| Vv01g1010 | Tc02_g030270 | . | Gorai.005G151100.1 | . |
| .         | .            | . | .                  | . |
| Vv01g1011 | .            | . | .                  | . |
| .         | .            | . | .                  | . |
| Vv01g1012 | .            | . | .                  | . |
| .         | .            | . | .                  | . |
| Vv01g1013 | .            | . | .                  | . |
| .         | .            | . | .                  | . |
| Vv01g1014 | .            | . | .                  | . |
| .         | .            | . | .                  | . |
| Vv01g1015 | .            | . | .                  | . |
| .         | .            | . | .                  | . |
| Vv01g1016 | .            | . | .                  | . |
| .         | .            | . | .                  | . |
| Vv01g1017 | .            | . | .                  | . |
| .         | .            | . | .                  | . |
| Vv01g1018 | .            | . | .                  | . |
| .         | .            | . | .                  | . |
| Vv01g1019 | .            | . | .                  | . |
| .         | .            | . | .                  | . |
| Vv01g1020 | .            | . | .                  | . |
| .         | .            | . | .                  | . |
| Vv01g1021 | .            | . | .                  | . |
| .         | .            | . | .                  | . |
| Vv01g1022 | .            | . | .                  | . |
| .         | .            | . | .                  | . |
| Vv01g1023 | .            | . | .                  | . |
| .         | .            | . | .                  | . |
| Vv01g1024 | .            | . | .                  | . |
| .         | .            | . | .                  | . |
| Vv01g1025 | .            | . | .                  | . |
| .         | .            | . | .                  | . |
| Vv01g1026 | .            | . | .                  | . |

|                    |              |                    |  |                    |  |  |
|--------------------|--------------|--------------------|--|--------------------|--|--|
| Vv01g1027          |              |                    |  |                    |  |  |
| Vv01g1028          |              |                    |  |                    |  |  |
| Vv01g1029          |              |                    |  |                    |  |  |
| Vv01g1030          |              |                    |  |                    |  |  |
| Vv01g1031          |              |                    |  |                    |  |  |
| Vv01g1032          |              | Gorai.013G090800.1 |  |                    |  |  |
| Vv01g1033          |              |                    |  |                    |  |  |
| Vv01g1034          | Tc02_g032570 | Gorai.013G090700.1 |  |                    |  |  |
| Vv01g1035          |              |                    |  |                    |  |  |
| Vv01g1036          | Tc02_g032580 | Gorai.013G090600.1 |  |                    |  |  |
| Vv01g1037          | Tc02_g032590 | Gorai.013G090500.1 |  |                    |  |  |
| Vv01g1038          |              |                    |  |                    |  |  |
| Vv01g1039          | Tc02_g030050 |                    |  | Gorai.009G328300.1 |  |  |
| Vv01g1040          |              |                    |  |                    |  |  |
| Vv01g1041          | Tc02_g031320 | Gorai.013G088700.1 |  |                    |  |  |
| Gorai.009G327300.1 |              |                    |  |                    |  |  |
| Vv01g1042          |              |                    |  |                    |  |  |

|              |                    |                    |                    |   |                    |   |
|--------------|--------------------|--------------------|--------------------|---|--------------------|---|
| Vv01g1043    | .                  | .                  | .                  | . | Gorai.008G175200.1 | . |
| .            | .                  | .                  | .                  | . | .                  | . |
| Vv01g1044    | .                  | .                  | .                  | . | .                  | . |
| .            | .                  | .                  | .                  | . | .                  | . |
| Vv01g1045    | .                  | .                  | .                  | . | .                  | . |
| .            | .                  | .                  | .                  | . | .                  | . |
| Vv01g1046    | .                  | .                  | .                  | . | .                  | . |
| .            | .                  | .                  | .                  | . | .                  | . |
| Vv01g1047    | .                  | .                  | Gorai.005G147500.1 | . | .                  | . |
| .            | .                  | .                  | .                  | . | .                  | . |
| Vv01g1048    | .                  | .                  | .                  | . | .                  | . |
| .            | .                  | .                  | .                  | . | .                  | . |
| Vv01g1049    | .                  | .                  | .                  | . | .                  | . |
| .            | .                  | .                  | .                  | . | .                  | . |
| Vv01g1050    | .                  | .                  | .                  | . | .                  | . |
| .            | .                  | .                  | .                  | . | .                  | . |
| Vv01g1051    | .                  | .                  | .                  | . | .                  | . |
| .            | .                  | .                  | .                  | . | .                  | . |
| Vv01g1052    | .                  | .                  | .                  | . | .                  | . |
| .            | .                  | .                  | .                  | . | .                  | . |
| Vv01g1053    | Tc02_g031310       | Gorai.013G098100.1 | .                  | . | .                  | . |
|              | Gorai.008G175000.1 | .                  | .                  | . | .                  | . |
| .            | .                  | .                  | .                  | . | .                  | . |
| Vv01g1054    | Tc02_g031300       | .                  | .                  | . | Gorai.             | . |
| 008G174900.1 | .                  | .                  | .                  | . | .                  | . |
| .            | .                  | .                  | .                  | . | .                  | . |
| Vv01g1055    | .                  | .                  | .                  | . | .                  | . |
| .            | .                  | .                  | .                  | . | .                  | . |
| Vv01g1056    | Tc02_g012240       | .                  | .                  | . | .                  | . |
| .            | .                  | .                  | .                  | . | .                  | . |
| Vv01g1057    | .                  | .                  | .                  | . | .                  | . |
| .            | .                  | .                  | .                  | . | .                  | . |
| Vv01g1058    | Tc02_g031290       | Gorai.005G147900.1 | .                  | . | .                  | . |
| .            | .                  | .                  | .                  | . | .                  | . |
| .            | .                  | .                  | .                  | . | .                  | . |





|                    |              |   |                    |                    |   |   |
|--------------------|--------------|---|--------------------|--------------------|---|---|
| Vv01g1091          | .            | . | .                  | .                  | . | . |
| .                  | .            | . | .                  | .                  | . | . |
| .                  | .            | . | .                  | .                  | . | . |
| Vv01g1092          | Tc02_g030740 |   | Gorai.013G102300.1 | .                  |   | . |
| Gorai.009G327500.1 | .            | . | .                  | .                  | . | . |
| .                  | .            | . | .                  | .                  | . | . |
| .                  | .            | . | .                  | .                  | . | . |
| Vv01g1093          | .            | . | .                  | .                  | . | . |
| .                  | .            | . | .                  | .                  | . | . |
| .                  | .            | . | .                  | .                  | . | . |
| Vv01g1094          | Tc02_g030430 | . | .                  | .                  | . | . |
| .                  | .            | . | .                  | .                  | . | . |
| .                  | .            | . | .                  | .                  | . | . |
| Vv01g1095          | .            | . | .                  | .                  | . | . |
| .                  | .            | . | .                  | .                  | . | . |
| .                  | .            | . | .                  | .                  | . | . |
| Vv01g1096          | .            | . | .                  | .                  | . | . |
| .                  | .            | . | .                  | .                  | . | . |
| .                  | .            | . | .                  | .                  | . | . |
| Vv01g1097          | .            | . | .                  | .                  | . | . |
| .                  | .            | . | .                  | .                  | . | . |
| .                  | .            | . | .                  | .                  | . | . |
| Vv01g1098          | .            | . | Gorai.005G149100.1 | .                  | . | . |
| .                  | .            | . | .                  | .                  | . | . |
| .                  | .            | . | .                  | .                  | . | . |
| Vv01g1099          | Tc02_g007110 | . | .                  | Gorai.002G005900.1 | . | . |
| .                  | .            | . | .                  | .                  | . | . |
| .                  | .            | . | .                  | .                  | . | . |
| Vv01g1100          | .            | . | .                  | .                  | . | . |
| .                  | .            | . | .                  | .                  | . | . |
| .                  | .            | . | .                  | .                  | . | . |
| Vv01g1101          | .            | . | .                  | .                  | . | . |
| .                  | .            | . | .                  | .                  | . | . |
| .                  | .            | . | .                  | .                  | . | . |
| Vv01g1102          | .            | . | .                  | .                  | . | . |
| .                  | .            | . | .                  | .                  | . | . |
| .                  | .            | . | .                  | .                  | . | . |
| Vv01g1103          | .            | . | .                  | .                  | . | . |
| .                  | .            | . | .                  | .                  | . | . |
| .                  | .            | . | .                  | .                  | . | . |
| Vv01g1104          | .            | . | .                  | .                  | . | . |
| .                  | .            | . | .                  | .                  | . | . |
| .                  | .            | . | .                  | .                  | . | . |
| Vv01g1105          | Tc02_g027210 | . | .                  | .                  | . | . |
| .                  | .            | . | .                  | .                  | . | . |
| .                  | .            | . | .                  | .                  | . | . |
| Vv01g1106          | Tc02_g027230 | . | .                  | .                  | . | . |
| .                  | .            | . | .                  | .                  | . | . |
| .                  | .            | . | .                  | .                  | . | . |
| Vv01g1107          | .            | . | .                  | .                  | . | . |

|           |              |                    |
|-----------|--------------|--------------------|
| Vv01g1108 | Tc02_g030420 | Gorai.005G150600.1 |
| Vv01g1109 |              |                    |
| Vv01g1110 |              | Gorai.008G174300.1 |
| Vv01g1111 |              |                    |
| Vv01g1112 |              |                    |
| Vv01g1113 |              |                    |
| Vv01g1114 |              |                    |
| Vv01g1115 |              |                    |
| Vv01g1116 |              |                    |
| Vv01g1117 | Tc02_g030380 | Gorai.009G328100.1 |
| Vv01g1118 |              |                    |
| Vv01g1119 |              |                    |
| Vv01g1120 |              |                    |
| Vv01g1121 |              |                    |
| Vv01g1122 | Tc02_g030350 | Gorai.005G150900.1 |
| Vv01g1123 |              |                    |



|           |                    |                    |   |   |   |   |
|-----------|--------------------|--------------------|---|---|---|---|
| Vv01g1124 | Tc02_g028780       | .                  | . | . | . | . |
| .         | .                  | .                  | . | . | . | . |
| Vv01g1125 | Tc02_g028790       | Gorai.002G167400.1 | . | . | . | . |
| .         | .                  | .                  | . | . | . | . |
| Vv01g1126 | .                  | .                  | . | . | . | . |
| .         | .                  | .                  | . | . | . | . |
| Vv01g1127 | Gorai.002G167300.1 | .                  | . | . | . | . |
| .         | .                  | .                  | . | . | . | . |
| Vv01g1128 | .                  | .                  | . | . | . | . |
| .         | .                  | .                  | . | . | . | . |
| Vv01g1129 | .                  | .                  | . | . | . | . |
| .         | .                  | .                  | . | . | . | . |
| Vv01g1130 | .                  | .                  | . | . | . | . |
| .         | .                  | .                  | . | . | . | . |
| Vv01g1131 | Tc02_g003670       | .                  | . | . | . | . |
| .         | .                  | .                  | . | . | . | . |
| Vv01g1132 | .                  | .                  | . | . | . | . |
| .         | .                  | .                  | . | . | . | . |
| Vv01g1133 | .                  | .                  | . | . | . | . |
| .         | .                  | .                  | . | . | . | . |
| Vv01g1134 | .                  | .                  | . | . | . | . |
| .         | .                  | .                  | . | . | . | . |
| Vv01g1135 | .                  | .                  | . | . | . | . |
| .         | .                  | .                  | . | . | . | . |
| Vv01g1136 | Tc02_g006690       | .                  | . | . | . | . |
| .         | .                  | .                  | . | . | . | . |
| Vv01g1137 | .                  | .                  | . | . | . | . |
| .         | .                  | .                  | . | . | . | . |
| Vv01g1138 | .                  | .                  | . | . | . | . |
| .         | .                  | .                  | . | . | . | . |
| Vv01g1139 | .                  | .                  | . | . | . | . |
| .         | .                  | .                  | . | . | . | . |
| Vv01g1140 | .                  | .                  | . | . | . | . |
| .         | .                  | .                  | . | . | . | . |



|                    |              |                    |   |   |   |   |
|--------------------|--------------|--------------------|---|---|---|---|
| Vv01g1157          | .            | .                  | . | . | . | . |
| Vv17g0108          | Tc03_g012600 | .                  | . | . | . | . |
| .                  | .            | .                  | . | . | . | . |
| Vv01g1158          | .            | .                  | . | . | . | . |
| .                  | .            | .                  | . | . | . | . |
| Vv01g1159          | .            | .                  | . | . | . | . |
| .                  | .            | .                  | . | . | . | . |
| Vv01g1160          | .            | .                  | . | . | . | . |
| .                  | .            | .                  | . | . | . | . |
| Vv01g1161          | .            | .                  | . | . | . | . |
| .                  | .            | .                  | . | . | . | . |
| Vv01g1162          | .            | .                  | . | . | . | . |
| .                  | .            | .                  | . | . | . | . |
| Vv01g1163          | Tc02_g019490 | .                  | . | . | . | . |
| .                  | .            | .                  | . | . | . | . |
| Vv01g1164          | .            | .                  | . | . | . | . |
| .                  | .            | .                  | . | . | . | . |
| Vv01g1165          | Tc02_g030230 | Gorai.013G028500.1 | . | . | . | . |
| Gorai.008G168000.1 | .            | .                  | . | . | . | . |
| .                  | .            | .                  | . | . | . | . |
| Vv01g1166          | .            | .                  | . | . | . | . |
| .                  | .            | .                  | . | . | . | . |
| Vv01g1167          | .            | .                  | . | . | . | . |
| .                  | .            | .                  | . | . | . | . |
| Vv01g1168          | .            | .                  | . | . | . | . |
| .                  | .            | .                  | . | . | . | . |
| Vv01g1169          | Tc02_g019380 | .                  | . | . | . | . |
| .                  | .            | .                  | . | . | . | . |
| Vv01g1170          | .            | .                  | . | . | . | . |
| .                  | .            | .                  | . | . | . | . |
| Vv01g1171          | .            | Gorai.013G028400.1 | . | . | . | . |
| .                  | .            | .                  | . | . | . | . |
| Vv01g1172          | .            | .                  | . | . | . | . |
| .                  | .            | .                  | . | . | . | . |
| Vv01g1173          | .            | .                  | . | . | . | . |

|                    |              |                    |                    |   |        |   |   |
|--------------------|--------------|--------------------|--------------------|---|--------|---|---|
| .                  | .            | .                  | .                  | . | .      | . | . |
| .                  | .            | .                  | .                  | . | .      | . | . |
| Vv01g1174          | Tc02_g006310 | .                  | Gorai.005G154500.1 | . | .      | . | . |
| Gorai.002G003900.1 | .            | .                  | .                  | . | .      | . | . |
| .                  | .            | .                  | .                  | . | .      | . | . |
| .                  | .            | .                  | .                  | . | .      | . | . |
| Vv01g1175          | .            | Gorai.013G028100.1 | .                  | . | .      | . | . |
| .                  | .            | .                  | .                  | . | .      | . | . |
| .                  | .            | .                  | .                  | . | .      | . | . |
| Vv01g1176          | Tc02_g028860 | Gorai.013G027500.1 | .                  | . | .      | . | . |
| .                  | .            | .                  | .                  | . | .      | . | . |
| .                  | .            | .                  | .                  | . | .      | . | . |
| Vv01g1177          | .            | .                  | .                  | . | .      | . | . |
| .                  | .            | .                  | .                  | . | .      | . | . |
| .                  | .            | .                  | .                  | . | .      | . | . |
| Vv01g1178          | .            | .                  | .                  | . | .      | . | . |
| .                  | .            | .                  | .                  | . | .      | . | . |
| .                  | .            | .                  | .                  | . | .      | . | . |
| Vv01g1179          | Tc02_g028880 | Gorai.002G167900.1 | .                  | . | .      | . | . |
| .                  | .            | .                  | .                  | . | .      | . | . |
| .                  | .            | .                  | .                  | . | .      | . | . |
| Vv01g1180          | .            | .                  | .                  | . | .      | . | . |
| .                  | .            | .                  | .                  | . | .      | . | . |
| .                  | .            | .                  | .                  | . | .      | . | . |
| Vv01g1181          | Tc02_g028890 | .                  | .                  | . | Gorai. | . | . |
| 008G168700.1       | .            | .                  | .                  | . | .      | . | . |
| .                  | .            | .                  | .                  | . | .      | . | . |
| Vv01g1182          | .            | .                  | .                  | . | .      | . | . |
| .                  | .            | .                  | .                  | . | .      | . | . |
| .                  | .            | .                  | .                  | . | .      | . | . |
| Vv01g1183          | .            | .                  | .                  | . | .      | . | . |
| .                  | .            | .                  | .                  | . | .      | . | . |
| .                  | .            | .                  | .                  | . | .      | . | . |
| Vv01g1184          | .            | .                  | .                  | . | .      | . | . |
| .                  | .            | .                  | .                  | . | .      | . | . |
| .                  | .            | .                  | .                  | . | .      | . | . |
| Vv01g1185          | .            | .                  | .                  | . | .      | . | . |
| .                  | .            | .                  | .                  | . | .      | . | . |
| .                  | .            | .                  | .                  | . | .      | . | . |
| Vv01g1186          | .            | .                  | .                  | . | .      | . | . |
| .                  | .            | .                  | .                  | . | .      | . | . |
| .                  | .            | .                  | .                  | . | .      | . | . |
| Vv01g1187          | Tc02_g028900 | Gorai.002G168100.1 | .                  | . | .      | . | . |
| .                  | .            | .                  | .                  | . | .      | . | . |
| .                  | .            | .                  | .                  | . | .      | . | . |
| Vv01g1188          | Tc02_g028910 | Gorai.002G168200.1 | .                  | . | .      | . | . |
| .                  | .            | .                  | .                  | . | .      | . | . |
| .                  | .            | .                  | .                  | . | .      | . | . |
| Vv01g1189          | .            | .                  | .                  | . | .      | . | . |
| .                  | .            | .                  | .                  | . | .      | . | . |

|                    |                    |                    |   |           |
|--------------------|--------------------|--------------------|---|-----------|
| Vv01g1190          | Tc02_g028930       | Gorai.002G168300.1 | . | .         |
| .                  | .                  | .                  | . | .         |
| Vv01g1191          | .                  | .                  | . | .         |
| .                  | .                  | .                  | . | .         |
| Vv01g1192          | .                  | .                  | . | .         |
| .                  | .                  | .                  | . | .         |
| Vv01g1193          | .                  | .                  | . | .         |
| Vv17g0097          | Tc03_g015160       | Gorai.001G057100.1 | . | .         |
|                    | Gorai.008G207300.1 | Gorai.006G272200.1 | . | .         |
| .                  | .                  | .                  | . | .         |
| Vv01g1194          | .                  | .                  | . | .         |
| .                  | .                  | .                  | . | .         |
| Vv01g1195          | .                  | .                  | . | Gorai.    |
| 012G124400.1       | .                  | .                  | . | .         |
| .                  | .                  | .                  | . | .         |
| Vv01g1196          | .                  | .                  | . | .         |
| .                  | .                  | .                  | . | .         |
| Vv01g1197          | .                  | Gorai.005G194000.1 | . | .         |
| .                  | .                  | .                  | . | .         |
| Vv01g1198          | .                  | .                  | . | .         |
| .                  | .                  | .                  | . | .         |
| Vv01g1199          | .                  | .                  | . | .         |
| .                  | .                  | .                  | . | .         |
| Vv01g1200          | .                  | .                  | . | .         |
| Vv17g0088          | Tc03_g015290       | Gorai.001G056500.1 | . | .         |
| .                  | Vv14g1122          | .                  | . | .         |
| Gorai.007G068800.1 | Gorai.006G043900.1 | Gorai.012G084400.1 | . | .         |
| Vv01g1201          | .                  | .                  | . | .         |
| .                  | .                  | .                  | . | .         |
| Vv01g1202          | .                  | .                  | . | .         |
| .                  | .                  | .                  | . | .         |
| Vv01g1203          | .                  | Gorai.005G194100.1 | . | .         |
| .                  | .                  | .                  | . | .         |
| Vv01g1204          | .                  | .                  | . | .         |
| .                  | .                  | .                  | . | .         |
| Vv01g1205          | .                  | .                  | . | .         |
| .                  | .                  | .                  | . | Vv14g1119 |

|                    |                    |   |                    |              |
|--------------------|--------------------|---|--------------------|--------------|
| 006G044200.1       | .                  | . | Gorai.007G071700.1 | Gorai.       |
| Vv01g1206          | .                  | . | .                  | .            |
| .                  | .                  | . | .                  | .            |
| Vv01g1207          | .                  | . | Gorai.005G194700.1 | .            |
| .                  | .                  | . | .                  | .            |
| Vv01g1208          | Tc02_g018500       | . | .                  | Gorai.       |
| 008G205800.1       | .                  | . | .                  | .            |
| Vv01g1209          | .                  | . | .                  | .            |
| .                  | .                  | . | .                  | .            |
| Vv01g1210          | .                  | . | Gorai.005G194900.1 | .            |
| Gorai.008G157200.1 | .                  | . | .                  | .            |
| .                  | .                  | . | .                  | .            |
| Vv01g1211          | Tc02_g018390       | . | Gorai.005G195000.1 | .            |
| Gorai.008G156900.1 | .                  | . | Gorai.012G124500.1 | .            |
| .                  | .                  | . | Vv14g1110          | .            |
| Vv01g1212          | Tc02_g020470       | . | Gorai.012G084000.1 | .            |
| .                  | .                  | . | Gorai.002G016600.1 | .            |
| Vv01g1213          | .                  | . | .                  | .            |
| .                  | .                  | . | .                  | .            |
| Vv01g1214          | .                  | . | Gorai.005G195100.1 | .            |
| Gorai.008G209000.1 | Gorai.012G124700.1 | . | Vv17g0072          | .            |
| Tc03_g015460       | Gorai.001G055500.1 | . | Gorai.             | .            |
| 008G209100.1       | .                  | . | .                  | .            |
| Vv01g1215          | .                  | . | .                  | .            |
| .                  | .                  | . | .                  | .            |
| Vv01g1216          | .                  | . | .                  | .            |
| .                  | .                  | . | .                  | .            |
| Vv01g1217          | .                  | . | .                  | .            |
| .                  | .                  | . | .                  | .            |
| Vv01g1218          | .                  | . | .                  | .            |
| .                  | .                  | . | .                  | .            |
| Vv01g1219          | .                  | . | .                  | .            |
| .                  | .                  | . | .                  | .            |
| Vv01g1220          | .                  | . | Gorai.005G195600.1 | .            |
| Gorai.008G156700.1 | .                  | . | Vv17g0060          | Tc03_g015520 |

|                    |                    |                    |                    |   |   |
|--------------------|--------------------|--------------------|--------------------|---|---|
| .                  | .                  | Gorai.008G156700.1 | .                  | . | . |
| .                  | .                  | .                  | .                  | . | . |
| Vv01g1221          | .                  | .                  | .                  | . | . |
| .                  | .                  | .                  | .                  | . | . |
| .                  | .                  | .                  | .                  | . | . |
| Vv01g1222          | .                  | Gorai.005G195700.1 | .                  | . | . |
| Gorai.008G156600.1 | .                  | .                  | .                  | . | . |
| .                  | .                  | Vv14g1101          | Tc04_g004700       | . | . |
| .                  | .                  | Gorai.012G083500.1 | .                  | . | . |
| Vv01g1223          | .                  | .                  | .                  | . | . |
| .                  | .                  | .                  | .                  | . | . |
| .                  | .                  | .                  | .                  | . | . |
| Vv01g1224          | .                  | .                  | .                  | . | . |
| .                  | .                  | .                  | .                  | . | . |
| .                  | .                  | .                  | .                  | . | . |
| Vv01g1225          | .                  | Gorai.005G195800.1 | .                  | . | . |
| .                  | .                  | .                  | .                  | . | . |
| .                  | .                  | Vv14g1089          | Tc04_g004790       | . | . |
| .                  | .                  | Gorai.012G083100.1 | .                  | . | . |
| Vv01g1226          | .                  | .                  | .                  | . | . |
| Vv17g0050          | Tc03_g015570       | Gorai.001G055200.1 | .                  | . | . |
| .                  | Gorai.006G272800.1 | .                  | .                  | . | . |
| .                  | .                  | .                  | .                  | . | . |
| Vv01g1227          | .                  | Gorai.005G195900.1 | .                  | . | . |
| Gorai.008G156500.1 | .                  | .                  | .                  | . | . |
| .                  | .                  | .                  | .                  | . | . |
| .                  | .                  | .                  | .                  | . | . |
| Vv01g1228          | .                  | .                  | .                  | . | . |
| .                  | .                  | .                  | .                  | . | . |
| .                  | .                  | .                  | .                  | . | . |
| Vv01g1229          | .                  | .                  | .                  | . | . |
| .                  | .                  | .                  | .                  | . | . |
| .                  | .                  | .                  | .                  | . | . |
| Vv01g1230          | .                  | .                  | .                  | . | . |
| .                  | .                  | .                  | .                  | . | . |
| .                  | .                  | .                  | .                  | . | . |
| Vv01g1231          | .                  | .                  | .                  | . | . |
| .                  | .                  | .                  | .                  | . | . |
| .                  | .                  | .                  | .                  | . | . |
| Vv01g1232          | .                  | .                  | Gorai.008G156400.1 | . | . |
| .                  | .                  | .                  | .                  | . | . |
| .                  | .                  | .                  | .                  | . | . |
| Vv01g1233          | .                  | Gorai.005G196000.1 | .                  | . | . |
| .                  | .                  | .                  | .                  | . | . |
| .                  | .                  | Vv14g1087          | Tc04_g004840       | . | . |
| .                  | .                  | .                  | .                  | . | . |
| Vv01g1234          | .                  | .                  | .                  | . | . |
| .                  | .                  | .                  | .                  | . | . |
| .                  | .                  | .                  | .                  | . | . |
| Vv01g1235          | .                  | .                  | .                  | . | . |

|                    |                    |                    |   |                    |                    |           |   |
|--------------------|--------------------|--------------------|---|--------------------|--------------------|-----------|---|
| .                  | .                  | .                  | . | .                  | .                  | .         | . |
| .                  | .                  | .                  | . | .                  | .                  | .         | . |
| Vv01g1236          | .                  | .                  | . | .                  | .                  | .         | . |
| .                  | .                  | .                  | . | .                  | .                  | .         | . |
| .                  | .                  | .                  | . | .                  | .                  | .         | . |
| Vv01g1237          | .                  | .                  | . | .                  | .                  | .         | . |
| .                  | .                  | .                  | . | .                  | .                  | .         | . |
| .                  | .                  | .                  | . | .                  | .                  | Vv14g1084 | . |
| Tc04_g004860       | .                  | .                  | . | Gorai.007G072400.1 | .                  | .         | . |
| .                  | .                  | .                  | . | .                  | .                  | .         | . |
| Vv01g1238          | .                  | .                  | . | .                  | .                  | .         | . |
| .                  | .                  | .                  | . | .                  | .                  | .         | . |
| .                  | .                  | .                  | . | .                  | .                  | .         | . |
| Vv01g1239          | Tc02_g019970       | .                  | . | Gorai.005G196200.1 | .                  | .         | . |
| .                  | .                  | .                  | . | .                  | .                  | .         | . |
| .                  | .                  | .                  | . | .                  | .                  | .         | . |
| Vv01g1240          | Tc02_g019960       | .                  | . | .                  | .                  | .         | . |
| .                  | .                  | .                  | . | .                  | .                  | .         | . |
| .                  | .                  | .                  | . | .                  | .                  | .         | . |
| Vv01g1241          | Tc02_g019950       | .                  | . | Gorai.005G196300.1 | .                  | .         | . |
| Gorai.008G156200.1 | .                  | .                  | . | .                  | .                  | .         | . |
| .                  | .                  | .                  | . | .                  | .                  | .         | . |
| .                  | .                  | .                  | . | .                  | .                  | .         | . |
| Vv01g1242          | .                  | .                  | . | .                  | Gorai.008G209700.1 | .         | . |
| .                  | Vv17g0047          | Tc03_g015600       | . | Gorai.001G055000.1 | .                  | .         | . |
| .                  | Gorai.007G044300.1 | Gorai.008G209700.1 | . | .                  | .                  | .         | . |
| Gorai.006G272900.1 | .                  | .                  | . | .                  | .                  | .         | . |
| .                  | .                  | .                  | . | .                  | .                  | .         | . |
| Vv01g1243          | .                  | .                  | . | .                  | .                  | .         | . |
| .                  | .                  | .                  | . | .                  | .                  | .         | . |
| .                  | .                  | .                  | . | .                  | .                  | .         | . |
| Vv01g1244          | Tc02_g019910       | .                  | . | .                  | Gorai.             | .         | . |
| 008G209900.1       | .                  | .                  | . | .                  | .                  | .         | . |
| .                  | .                  | .                  | . | .                  | .                  | .         | . |
| Vv01g1245          | .                  | .                  | . | .                  | .                  | .         | . |
| .                  | .                  | .                  | . | .                  | .                  | .         | . |
| .                  | .                  | .                  | . | .                  | .                  | .         | . |
| Vv01g1246          | .                  | .                  | . | .                  | Gorai.008G210000.1 | .         | . |
| .                  | .                  | .                  | . | .                  | .                  | .         | . |
| .                  | .                  | .                  | . | .                  | .                  | .         | . |
| Vv01g1247          | .                  | .                  | . | .                  | .                  | .         | . |
| .                  | .                  | .                  | . | .                  | .                  | .         | . |
| .                  | .                  | .                  | . | .                  | .                  | .         | . |
| Vv01g1248          | Tc02_g019780       | .                  | . | .                  | .                  | .         | . |
| .                  | .                  | .                  | . | .                  | .                  | .         | . |
| .                  | .                  | .                  | . | .                  | .                  | .         | . |
| Vv01g1249          | Tc02_g019760       | .                  | . | .                  | Gorai.             | .         | . |
| 008G210100.1       | Vv17g0039          | Tc03_g015670       | . | .                  | .                  | .         | . |
| Gorai.007G044600.1 | Gorai.008G210100.1 | .                  | . | .                  | .                  | .         | . |
| .                  | .                  | .                  | . | .                  | .                  | .         | . |
| Vv01g1250          | Tc02_g023750       | .                  | . | Gorai.009G337800.1 | .                  | .         | . |



|                    |              |   |   |                    |   |        |   |
|--------------------|--------------|---|---|--------------------|---|--------|---|
| .                  | .            | . | . | .                  | . | .      | . |
| .                  | .            | . | . | .                  | . | .      | . |
| Vv01g1251          | Tc02_g019750 | . | . | Gorai.005G196500.1 | . | .      | . |
| .                  | Vv17g0038    | . | . | Tc03_g015680       | . | .      | . |
| Gorai.007G044700.1 | .            | . | . | .                  | . | .      | . |
| .                  | .            | . | . | .                  | . | .      | . |
| Vv01g1252          | Tc02_g019740 | . | . | Gorai.005G196600.1 | . | .      | . |
| .                  | .            | . | . | .                  | . | .      | . |
| .                  | .            | . | . | .                  | . | .      | . |
| Vv01g1253          | Tc02_g019710 | . | . | .                  | . | .      | . |
| .                  | .            | . | . | .                  | . | .      | . |
| .                  | .            | . | . | .                  | . | .      | . |
| Vv01g1254          | .            | . | . | .                  | . | .      | . |
| .                  | .            | . | . | .                  | . | .      | . |
| .                  | .            | . | . | .                  | . | .      | . |
| Vv01g1255          | Tc02_g019700 | . | . | .                  | . | .      | . |
| .                  | .            | . | . | .                  | . | .      | . |
| Vv14g1069          | Tc04_g005100 | . | . | Gorai.001G275700.1 | . | .      | . |
| Gorai.006G000400.1 | .            | . | . | .                  | . | .      | . |
| Vv01g1256          | Tc02_g019690 | . | . | .                  | . | Gorai. | . |
| 008G210200.1       | .            | . | . | .                  | . | .      | . |
| .                  | .            | . | . | .                  | . | .      | . |
| Vv01g1257          | .            | . | . | .                  | . | .      | . |
| Vv17g0033          | Tc03_g015720 | . | . | Gorai.001G054600.1 | . | .      | . |
| Gorai.007G044900.1 | .            | . | . | .                  | . | .      | . |
| .                  | .            | . | . | .                  | . | .      | . |
| Vv01g1258          | .            | . | . | .                  | . | .      | . |
| .                  | .            | . | . | .                  | . | .      | . |
| .                  | .            | . | . | .                  | . | .      | . |
| Vv01g1259          | .            | . | . | .                  | . | Gorai. | . |
| 012G125000.1       | .            | . | . | .                  | . | .      | . |
| Vv14g1066          | Tc04_g005150 | . | . | .                  | . | Gorai. | . |
| 007G072700.1       | .            | . | . | .                  | . | .      | . |
| Vv01g1260          | .            | . | . | .                  | . | .      | . |
| .                  | .            | . | . | .                  | . | .      | . |
| .                  | .            | . | . | .                  | . | .      | . |
| Vv01g1261          | Tc02_g024160 | . | . | Gorai.009G337000.1 | . | .      | . |
| .                  | .            | . | . | .                  | . | .      | . |
| .                  | .            | . | . | .                  | . | .      | . |
| Vv01g1262          | .            | . | . | Gorai.005G196700.1 | . | .      | . |
| .                  | .            | . | . | .                  | . | .      | . |
| .                  | .            | . | . | .                  | . | .      | . |
| Vv01g1263          | .            | . | . | Gorai.005G196800.1 | . | .      | . |
| .                  | .            | . | . | .                  | . | .      | . |
| .                  | .            | . | . | .                  | . | .      | . |
| Vv01g1264          | .            | . | . | .                  | . | .      | . |
| Vv17g0026          | Tc03_g015810 | . | . | .                  | . | .      | . |
| .                  | .            | . | . | .                  | . | .      | . |
| Vv01g1265          | Tc02_g024380 | . | . | .                  | . | Gorai. | . |
| 008G156100.1       | .            | . | . | .                  | . | .      | . |

|                    |              |                    |                    |   |
|--------------------|--------------|--------------------|--------------------|---|
| Vv01g1266          | Tc02_g002960 | .                  | Gorai.005G196900.1 | . |
| .                  | Vv14g1058    | Tc05_g025990       | .                  | . |
| Vv01g1267          | .            | .                  | .                  | . |
| .                  | .            | .                  | .                  | . |
| Vv01g1268          | .            | .                  | Gorai.008G210400.1 | . |
| .                  | .            | .                  | .                  | . |
| Vv01g1269          | .            | Gorai.005G197000.1 | .                  | . |
| .                  | .            | .                  | .                  | . |
| Vv01g1270          | .            | .                  | .                  | . |
| .                  | .            | .                  | .                  | . |
| Vv01g1271          | .            | .                  | .                  | . |
| .                  | .            | .                  | .                  | . |
| Vv01g1272          | .            | .                  | .                  | . |
| .                  | .            | .                  | .                  | . |
| Vv01g1273          | Tc02_g024890 | .                  | .                  | . |
| .                  | .            | .                  | .                  | . |
| Vv01g1274          | .            | .                  | .                  | . |
| .                  | .            | .                  | .                  | . |
| Vv01g1275          | .            | .                  | Gorai.008G210800.1 | . |
| .                  | .            | .                  | .                  | . |
| Vv01g1276          | .            | .                  | Gorai.             | . |
| 012G125800.1       | Vv17g0017    | Tc03_g015940       | .                  | . |
| .                  | .            | .                  | .                  | . |
| Vv01g1277          | .            | .                  | .                  | . |
| .                  | .            | .                  | Vv14g1054          | . |
| Tc04_g005260       | .            | Gorai.007G072800.1 | .                  | . |
| .                  | .            | .                  | .                  | . |
| Vv01g1278          | .            | .                  | .                  | . |
| Vv17g0012          | Tc03_g015970 | Gorai.001G053800.1 | .                  | . |
| .                  | .            | .                  | .                  | . |
| Vv01g1279          | .            | .                  | .                  | . |
| .                  | .            | .                  | .                  | . |
| Vv01g1280          | .            | .                  | Gorai.008G156000.1 | . |
| .                  | Vv17g0011    | Tc03_g015980       | .                  | . |
| Gorai.008G156000.1 | .            | .                  | .                  | . |

|                    |              |              |                    |                    |   |        |
|--------------------|--------------|--------------|--------------------|--------------------|---|--------|
| Vv01g1281          | .            | .            | .                  | .                  | . | Gorai. |
| 012G125900.1       | .            | .            | .                  | .                  | . | .      |
| Vv01g1282          | .            | .            | .                  | .                  | . | Gorai. |
| 012G126000.1       | .            | .            | .                  | .                  | . | .      |
| Vv01g1283          | Tc02_g025270 | .            | .                  | .                  | . | Gorai. |
| 008G155900.1       | .            | .            | .                  | .                  | . | .      |
| Vv01g1284          | Tc02_g018910 | .            | .                  | .                  | . | .      |
| .                  | .            | .            | .                  | .                  | . | .      |
| Vv01g1285          | .            | .            | .                  | .                  | . | .      |
| .                  | .            | .            | .                  | .                  | . | .      |
| Vv01g1286          | Tc02_g018890 | .            | .                  | .                  | . | .      |
| .                  | .            | .            | .                  | .                  | . | .      |
| Vv01g1287          | Tc02_g018880 | .            | .                  | .                  | . | .      |
| Gorai.012G126100.1 | .            | .            | .                  | .                  | . | .      |
| Vv01g1288          | .            | .            | .                  | .                  | . | .      |
| .                  | .            | .            | .                  | .                  | . | .      |
| Vv01g1289          | Tc02_g018870 | .            | .                  | Gorai.005G197200.1 | . | .      |
| Gorai.008G211200.1 | .            | .            | .                  | .                  | . | .      |
| .                  | .            | .            | .                  | .                  | . | .      |
| Vv01g1290          | .            | .            | .                  | .                  | . | .      |
| .                  | .            | .            | .                  | .                  | . | .      |
| Vv01g1291          | Tc02_g018860 | .            | .                  | Gorai.002G021000.1 | . | .      |
| .                  | .            | .            | .                  | .                  | . | .      |
| Vv01g1292          | .            | .            | Gorai.005G197700.1 | .                  | . | .      |
| Gorai.012G126200.1 | .            | .            | .                  | .                  | . | .      |
| .                  | .            | .            | .                  | .                  | . | .      |
| Vv01g1293          | .            | .            | .                  | .                  | . | .      |
| Vv14g1041          | Tc04_g005410 | .            | .                  | .                  | . | .      |
| .                  | .            | .            | .                  | .                  | . | .      |
| Vv01g1294          | .            | .            | .                  | Gorai.008G155700.1 | . | .      |
| .                  | Vv14g1040    | Tc04_g005460 | .                  | .                  | . | .      |
| .                  | .            | .            | .                  | .                  | . | .      |
| Vv01g1295          | .            | .            | Gorai.005G197900.1 | .                  | . | .      |
| .                  | .            | .            | .                  | .                  | . | .      |
| .                  | .            | .            | .                  | .                  | . | .      |
| Vv01g1296          | Tc02_g002710 | .            | .                  | .                  | . | Gorai. |

|              |                    |                    |                    |                    |   |
|--------------|--------------------|--------------------|--------------------|--------------------|---|
| 008G152800.1 | Gorai.012G126300.1 | .                  | .                  | .                  | . |
| .            | .                  | .                  | .                  | .                  | . |
| Vv01g1297    | .                  | .                  | .                  | .                  | . |
| .            | .                  | .                  | .                  | .                  | . |
| Vv01g1298    | .                  | .                  | .                  | .                  | . |
| Vv14g1024    | Tc04_g005560       | .                  | .                  | .                  | . |
| .            | .                  | .                  | .                  | .                  | . |
| Vv01g1299    | .                  | .                  | .                  | .                  | . |
| .            | .                  | .                  | .                  | .                  | . |
| Vv01g1300    | .                  | .                  | .                  | .                  | . |
| .            | .                  | .                  | .                  | .                  | . |
| Vv01g1301    | .                  | .                  | .                  | Gorai.008G211600.1 | . |
| .            | .                  | .                  | .                  | .                  | . |
| Vv01g1302    | .                  | .                  | .                  | .                  | . |
| .            | .                  | .                  | .                  | .                  | . |
| Vv01g1303    | .                  | .                  | .                  | .                  | . |
| .            | .                  | .                  | .                  | .                  | . |
| Vv01g1304    | .                  | .                  | .                  | .                  | . |
| .            | .                  | .                  | .                  | .                  | . |
| Vv01g1305    | .                  | .                  | .                  | Gorai.008G212100.1 | . |
| .            | .                  | .                  | .                  | .                  | . |
| Vv01g1306    | .                  | .                  | .                  | .                  | . |
| .            | .                  | .                  | .                  | .                  | . |
| Vv01g1307    | .                  | .                  | .                  | .                  | . |
| .            | .                  | .                  | .                  | .                  | . |
| Vv01g1308    | .                  | .                  | .                  | .                  | . |
| .            | .                  | .                  | .                  | .                  | . |
| Vv01g1309    | .                  | .                  | .                  | .                  | . |
| .            | .                  | .                  | .                  | .                  | . |
| Vv01g1310    | .                  | .                  | .                  | .                  | . |
| .            | .                  | .                  | .                  | .                  | . |
| Vv01g1311    | .                  | .                  | .                  | .                  | . |
| Vv14g1017    | Gorai.007G074000.1 | Gorai.011G088800.1 | Gorai.006G038900.1 | Gorai.001G276400.1 | . |
| .            | .                  | .                  | .                  | .                  | . |
| Vv01g1312    | .                  | .                  | .                  | .                  | . |

|           |   |   |   |   |   |   |   |
|-----------|---|---|---|---|---|---|---|
| .         | . | . | . | . | . | . | . |
| Vv01g1313 | . | . | . | . | . | . | . |
| .         | . | . | . | . | . | . | . |
| Vv01g1314 | . | . | . | . | . | . | . |
| .         | . | . | . | . | . | . | . |
| Vv01g1315 | . | . | . | . | . | . | . |
| .         | . | . | . | . | . | . | . |
| Vv01g1316 | . | . | . | . | . | . | . |
| .         | . | . | . | . | . | . | . |
| Vv01g1317 | . | . | . | . | . | . | . |
| .         | . | . | . | . | . | . | . |
| Vv01g1318 | . | . | . | . | . | . | . |
| .         | . | . | . | . | . | . | . |
| Vv01g1319 | . | . | . | . | . | . | . |
| .         | . | . | . | . | . | . | . |
| Vv01g1320 | . | . | . | . | . | . | . |
| .         | . | . | . | . | . | . | . |
| Vv01g1321 | . | . | . | . | . | . | . |
| .         | . | . | . | . | . | . | . |
| Vv01g1322 | . | . | . | . | . | . | . |
| .         | . | . | . | . | . | . | . |
| Vv01g1323 | . | . | . | . | . | . | . |
| .         | . | . | . | . | . | . | . |
| Vv01g1324 | . | . | . | . | . | . | . |
| .         | . | . | . | . | . | . | . |
| Vv01g1325 | . | . | . | . | . | . | . |
| .         | . | . | . | . | . | . | . |
| Vv01g1326 | . | . | . | . | . | . | . |
| .         | . | . | . | . | . | . | . |
| Vv01g1327 | . | . | . | . | . | . | . |
| .         | . | . | . | . | . | . | . |
| Vv02g0001 | . | . | . | . | . | . | . |
| .         | . | . | . | . | . | . | . |
| .         | . | . | . | . | . | . | . |

|                    |                    |                    |                    |                    |        |   |   |
|--------------------|--------------------|--------------------|--------------------|--------------------|--------|---|---|
| Vv02g0002          | .                  | .                  | .                  | .                  | .      | . | . |
| .                  | .                  | .                  | .                  | .                  | .      | . | . |
| Vv02g0003          | .                  | .                  | .                  | Gorai.007G101000.1 | .      | . | . |
| .                  | .                  | .                  | .                  | .                  | .      | . | . |
| Vv02g0004          | .                  | .                  | .                  | .                  | .      | . | . |
| .                  | .                  | .                  | .                  | .                  | .      | . | . |
| Vv02g0005          | .                  | .                  | Gorai.003G157300.1 | .                  | Gorai. | . | . |
| 007G023700.1       | Gorai.008G248000.1 | .                  | .                  | Vv015rg0193        | .      | . | . |
| .                  | .                  | .                  | .                  | .                  | .      | . | . |
| Vv02g0006          | Tc03_g027670       | .                  | Gorai.003G157100.1 | .                  | .      | . | . |
| Gorai.008G248200.1 | .                  | Gorai.006G209100.1 | .                  | .                  | .      | . | . |
| .                  | .                  | .                  | .                  | .                  | .      | . | . |
| Vv02g0007          | Tc03_g027680       | .                  | .                  | .                  | Gorai. | . | . |
| 008G248300.1       | .                  | .                  | .                  | .                  | .      | . | . |
| .                  | .                  | .                  | .                  | .                  | .      | . | . |
| Vv02g0008          | Tc03_g027730       | .                  | Gorai.003G157000.1 | .                  | .      | . | . |
| .                  | .                  | .                  | .                  | .                  | .      | . | . |
| Vv02g0009          | Tc03_g027740       | .                  | Gorai.003G156900.1 | .                  | .      | . | . |
| Gorai.007G023800.1 | .                  | .                  | .                  | .                  | .      | . | . |
| .                  | .                  | .                  | .                  | .                  | .      | . | . |
| Vv02g0010          | Tc03_g027750       | .                  | .                  | Gorai.007G023900.1 | .      | . | . |
| Gorai.008G248400.1 | .                  | Gorai.006G209000.1 | .                  | .                  | .      | . | . |
| .                  | .                  | .                  | .                  | .                  | .      | . | . |
| Vv02g0011          | Tc03_g027760       | Gorai.004G139700.1 | .                  | Gorai.             | .      | . | . |
| 003G156800.1       | Gorai.008G248500.1 | .                  | .                  | .                  | .      | . | . |
| .                  | .                  | .                  | .                  | .                  | .      | . | . |
| Vv02g0012          | .                  | .                  | .                  | .                  | .      | . | . |
| .                  | .                  | .                  | .                  | .                  | .      | . | . |
| Vv02g0013          | .                  | .                  | .                  | .                  | .      | . | . |
| .                  | .                  | .                  | .                  | .                  | .      | . | . |
| Vv02g0014          | .                  | .                  | .                  | .                  | .      | . | . |
| .                  | .                  | .                  | .                  | .                  | .      | . | . |
| Vv02g0015          | Tc03_g027810       | Gorai.004G139400.1 | .                  | Gorai.             | .      | . | . |
| 003G156100.1       | Gorai.008G248700.1 | Gorai.006G208800.1 | .                  | .                  | .      | . | . |
| .                  | .                  | .                  | .                  | .                  | .      | . | . |
| Vv02g0016          | .                  | .                  | .                  | .                  | .      | . | . |
| .                  | .                  | .                  | .                  | .                  | .      | . | . |

|                                        |                    |                    |   |           |        |   |
|----------------------------------------|--------------------|--------------------|---|-----------|--------|---|
| Vv02g0017<br>008G248800.1              | Tc03_g027820       | .                  | . | .         | Gorai. | . |
| Vv02g0018<br>003G156000.1              | Tc03_g027830       | Gorai.004G139300.1 | . | .         | Gorai. | . |
| Tc05_g003660<br>012G108300.1           | Gorai.008G248900.1 | .                  | . | Vv08g1047 | .      | . |
| Vv02g0019<br>003G155900.1              | Gorai.002G255800.1 | .                  | . | Gorai.    | .      | . |
| Vv08g1008<br>Vv02g0020<br>008G249400.1 | Tc03_g027840       | Gorai.004G139200.1 | . | .         | Gorai. | . |
| Vv02g0021                              | Tc05_g004020       | .                  | . | .         | .      | . |
| Vv02g0022<br>008G274800.1              | Tc03_g027850       | .                  | . | .         | Gorai. | . |
| Vv02g0023                              | Tc03_g027870       | .                  | . | .         | Gorai. | . |
| Vv02g0024<br>003G155800.1              | Tc03_g027890       | Gorai.004G139000.1 | . | .         | .      | . |
| Vv02g0025                              | Tc03_g027900       | Gorai.004G138900.1 | . | .         | Gorai. | . |
| Vv02g0026                              | Gorai.007G012900.1 | Gorai.008G274700.1 | . | .         | .      | . |
| Vv02g0027                              | Tc03_g027910       | Gorai.003G155700.1 | . | .         | .      | . |
| Vv02g0028<br>003G155600.1              | Tc03_g027920       | Gorai.004G138600.1 | . | .         | Gorai. | . |
| Vv02g0029                              | Gorai.008G274600.1 | .                  | . | .         | .      | . |
| Vv02g0030                              | Tc03_g027930       | Gorai.004G138500.1 | . | .         | .      | . |
| Vv02g0031<br>003G155500.1              | Tc03_g027940       | Gorai.004G138400.1 | . | .         | Gorai. | . |
|                                        | Gorai.006G208700.1 | .                  | . | .         | .      | . |

|                    |                    |                    |                    |   |        |   |   |
|--------------------|--------------------|--------------------|--------------------|---|--------|---|---|
| .                  | .                  | .                  | .                  | . | .      | . | . |
| .                  | .                  | .                  | .                  | . | .      | . | . |
| Vv02g0032          | .                  | .                  | .                  | . | .      | . | . |
| .                  | .                  | .                  | .                  | . | .      | . | . |
| .                  | .                  | .                  | .                  | . | .      | . | . |
| Vv02g0033          | Tc03_g027950       | .                  | Gorai.003G155300.1 | . | .      | . | . |
|                    | Gorai.008G249900.1 | .                  | .                  | . | .      | . | . |
| .                  | .                  | .                  | .                  | . | .      | . | . |
| .                  | .                  | .                  | .                  | . | .      | . | . |
| Vv02g0034          | Tc03_g027960       | .                  | .                  | . | Gorai. | . | . |
| 008G250000.1       | .                  | .                  | .                  | . | .      | . | . |
| .                  | .                  | .                  | .                  | . | .      | . | . |
| Vv02g0035          | Tc03_g027970       | Gorai.004G138000.1 | Gorai.             | . | .      | . | . |
| 003G154200.1       | .                  | Gorai.006G208600.1 | Vv015rg0199        | . | .      | . | . |
| .                  | .                  | .                  | .                  | . | .      | . | . |
| .                  | .                  | .                  | .                  | . | .      | . | . |
| Vv02g0036          | .                  | .                  | .                  | . | .      | . | . |
| .                  | .                  | .                  | .                  | . | .      | . | . |
| .                  | .                  | .                  | .                  | . | .      | . | . |
| Vv02g0037          | Tc03_g027980       | Gorai.004G137900.1 | Gorai.             | . | .      | . | . |
| 003G085900.1       | Gorai.007G024400.1 | Gorai.008G250100.1 | .                  | . | .      | . | . |
|                    | Vv015rg0200        | .                  | .                  | . | .      | . | . |
| .                  | .                  | .                  | .                  | . | .      | . | . |
| Vv02g0038          | Tc03_g027990       | Gorai.004G137800.1 | Gorai.             | . | .      | . | . |
| 003G085800.1       | .                  | .                  | .                  | . | .      | . | . |
| .                  | .                  | .                  | .                  | . | .      | . | . |
| .                  | .                  | .                  | .                  | . | .      | . | . |
| Vv02g0039          | Tc03_g028000       | Gorai.004G137700.1 | Gorai.             | . | .      | . | . |
| 003G085700.1       | .                  | .                  | .                  | . | .      | . | . |
| .                  | .                  | .                  | .                  | . | .      | . | . |
| .                  | .                  | .                  | .                  | . | .      | . | . |
| Vv02g0040          | Tc03_g028010       | .                  | Gorai.003G085600.1 | . | .      | . | . |
|                    | Gorai.008G250200.1 | .                  | .                  | . | .      | . | . |
| .                  | .                  | .                  | .                  | . | .      | . | . |
| .                  | .                  | .                  | .                  | . | .      | . | . |
| Vv02g0041          | Tc03_g028020       | Gorai.004G137600.1 | .                  | . | .      | . | . |
| .                  | .                  | .                  | .                  | . | .      | . | . |
| .                  | .                  | .                  | .                  | . | .      | . | . |
| Vv02g0042          | .                  | .                  | .                  | . | .      | . | . |
| .                  | .                  | .                  | .                  | . | .      | . | . |
| .                  | .                  | .                  | .                  | . | .      | . | . |
| Vv02g0043          | Tc03_g028030       | .                  | Gorai.003G085500.1 | . | .      | . | . |
| Gorai.007G013300.1 | Gorai.008G273700.1 | .                  | Vv015rg0207        | . | .      | . | . |
|                    | .                  | .                  | Vv08g0980          | . | .      | . | . |
|                    | Tc05_g004380       | Gorai.006G171700.1 | .                  | . | .      | . | . |
| Gorai.012G104800.1 | .                  | .                  | .                  | . | .      | . | . |
| Vv02g0044          | Tc03_g028040       | .                  | Gorai.             | . | .      | . | . |
| 008G250400.1       | .                  | .                  | .                  | . | .      | . | . |
| .                  | .                  | .                  | .                  | . | .      | . | . |
| .                  | .                  | .                  | .                  | . | .      | . | . |
| Vv02g0045          | Tc03_g028050       | .                  | Gorai.003G085400.1 | . | .      | . | . |



|                    |                    |                    |                    |                    |                    |   |   |
|--------------------|--------------------|--------------------|--------------------|--------------------|--------------------|---|---|
| .                  | .                  | .                  | .                  | .                  | .                  | . | . |
| Vv02g0046          | .                  | .                  | .                  | .                  | Gorai.008G273400.1 | . | . |
| .                  | .                  | .                  | .                  | .                  | .                  | . | . |
| Vv02g0047          | .                  | .                  | .                  | .                  | .                  | . | . |
| .                  | .                  | .                  | .                  | .                  | .                  | . | . |
| Vv02g0048          | .                  | Gorai.004G137500.1 | .                  | .                  | .                  | . | . |
| .                  | Vv015rg0210        | .                  | .                  | .                  | .                  | . | . |
| Vv02g0049          | Tc03_g028070       | .                  | Gorai.003G085300.1 | .                  | .                  | . | . |
| .                  | .                  | .                  | .                  | .                  | .                  | . | . |
| Vv02g0050          | Tc03_g028080       | .                  | .                  | Gorai.007G024600.1 | .                  | . | . |
| .                  | .                  | .                  | .                  | .                  | .                  | . | . |
| Vv02g0051          | Tc03_g028090       | Gorai.004G137400.1 | .                  | Gorai.             | .                  | . | . |
| 003G085200.1       | Gorai.007G024700.1 | .                  | .                  | .                  | .                  | . | . |
| .                  | .                  | .                  | .                  | .                  | .                  | . | . |
| Vv02g0052          | .                  | .                  | .                  | .                  | .                  | . | . |
| .                  | .                  | .                  | .                  | .                  | .                  | . | . |
| Vv02g0053          | Tc03_g028110       | Gorai.004G137300.1 | .                  | Gorai.             | .                  | . | . |
| 003G085100.1       | Gorai.008G250500.1 | .                  | .                  | Vv015rg0231        | .                  | . | . |
| .                  | .                  | .                  | .                  | .                  | .                  | . | . |
| Vv02g0054          | Tc03_g028180       | .                  | Gorai.003G084800.1 | .                  | .                  | . | . |
| Gorai.008G273000.1 | .                  | .                  | .                  | .                  | .                  | . | . |
| .                  | .                  | .                  | .                  | .                  | .                  | . | . |
| Vv02g0055          | .                  | .                  | .                  | .                  | .                  | . | . |
| .                  | .                  | .                  | .                  | .                  | .                  | . | . |
| Vv02g0056          | .                  | .                  | .                  | .                  | .                  | . | . |
| .                  | .                  | .                  | .                  | .                  | .                  | . | . |
| Vv02g0057          | .                  | .                  | .                  | .                  | .                  | . | . |
| .                  | .                  | .                  | .                  | .                  | .                  | . | . |
| Vv02g0058          | .                  | .                  | .                  | .                  | .                  | . | . |
| .                  | .                  | .                  | .                  | .                  | .                  | . | . |
| Vv02g0059          | .                  | .                  | .                  | .                  | .                  | . | . |
| .                  | .                  | .                  | .                  | .                  | .                  | . | . |
| Vv02g0060          | .                  | .                  | .                  | .                  | .                  | . | . |
| .                  | .                  | .                  | .                  | .                  | .                  | . | . |
| .                  | .                  | .                  | .                  | .                  | .                  | . | . |

|                    |                    |                    |              |   |   |   |   |
|--------------------|--------------------|--------------------|--------------|---|---|---|---|
| Vv02g0061          | .                  | .                  | .            | . | . | . | . |
| .                  | .                  | .                  | .            | . | . | . | . |
| Vv02g0062          | .                  | .                  | .            | . | . | . | . |
| .                  | .                  | .                  | .            | . | . | . | . |
| Vv02g0063          | Tc03_g028190       | Gorai.004G137000.1 | Gorai.       | . | . | . | . |
| 003G084400.1       | Gorai.007G013600.1 | Gorai.008G272900.1 | .            | . | . | . | . |
| Gorai.006G208500.1 | Vv015rg0246        | .                  | .            | . | . | . | . |
| .                  | .                  | .                  | .            | . | . | . | . |
| Vv02g0064          | Tc03_g028200       | Gorai.003G084300.1 | .            | . | . | . | . |
| .                  | Gorai.006G208400.1 | .                  | .            | . | . | . | . |
| .                  | .                  | .                  | .            | . | . | . | . |
| Vv02g0065          | Tc03_g028210       | Gorai.004G136900.1 | Gorai.       | . | . | . | . |
| 003G084200.1       | Gorai.007G024900.1 | .                  | .            | . | . | . | . |
| .                  | .                  | .                  | .            | . | . | . | . |
| Vv02g0066          | Tc03_g028220       | Gorai.003G084100.1 | .            | . | . | . | . |
| .                  | .                  | .                  | .            | . | . | . | . |
| Vv02g0067          | Tc03_g028230       | Gorai.003G084000.1 | .            | . | . | . | . |
| Gorai.007G025000.1 | .                  | .                  | .            | . | . | . | . |
| .                  | .                  | .                  | .            | . | . | . | . |
| Vv02g0068          | Tc03_g028240       | Gorai.004G136700.1 | Gorai.       | . | . | . | . |
| 003G083800.1       | .                  | Vv08g0941          | Tc05_g004820 | . | . | . | . |
| Gorai.002G258600.1 | .                  | .                  | .            | . | . | . | . |
| Vv02g0069          | Tc03_g028250       | Gorai.003G083700.1 | .            | . | . | . | . |
| .                  | Gorai.006G208300.1 | .                  | .            | . | . | . | . |
| .                  | .                  | .                  | .            | . | . | . | . |
| Vv02g0070          | .                  | Gorai.008G251200.1 | .            | . | . | . | . |
| .                  | .                  | .                  | .            | . | . | . | . |
| Vv02g0071          | Tc03_g028260       | .                  | .            | . | . | . | . |
| .                  | .                  | .                  | .            | . | . | . | . |
| Vv02g0072          | Tc03_g028270       | Gorai.004G136600.1 | Gorai.       | . | . | . | . |
| 003G083600.1       | .                  | .                  | .            | . | . | . | . |
| .                  | .                  | .                  | .            | . | . | . | . |
| Vv02g0073          | Tc03_g028280       | .                  | .            | . | . | . | . |
| .                  | .                  | .                  | .            | . | . | . | . |
| Vv02g0074          | Tc03_g028290       | Gorai.003G083500.1 | .            | . | . | . | . |
| .                  | .                  | .                  | .            | . | . | . | . |
| .                  | .                  | .                  | .            | . | . | . | . |

|                    |                    |                    |                    |                    |   |             |   |
|--------------------|--------------------|--------------------|--------------------|--------------------|---|-------------|---|
| Vv02g0075          | .                  | .                  | .                  | .                  | . | .           | . |
| .                  | .                  | .                  | .                  | .                  | . | Vv08g0933   | . |
| .                  | Tc05_g004900       | .                  | .                  | .                  | . | .           | . |
| Vv02g0076          | Tc03_g028310       | .                  | .                  | Gorai.003G083300.1 | . | .           | . |
| .                  | .                  | .                  | .                  | .                  | . | .           | . |
| .                  | Vv08g0932          | .                  | Tc05_g004910       | .                  | . | Gorai.      | . |
| 002G255100.1       | .                  | Gorai.012G102300.1 | .                  | .                  | . | .           | . |
| Vv02g0077          | .                  | .                  | .                  | .                  | . | .           | . |
| .                  | .                  | .                  | .                  | .                  | . | Vv08g0930   | . |
| .                  | Tc05_g004920       | .                  | .                  | .                  | . | .           | . |
| Vv02g0078          | Tc03_g028320       | .                  | .                  | Gorai.003G083100.1 | . | .           | . |
| .                  | .                  | .                  | .                  | .                  | . | .           | . |
| Vv02g0079          | .                  | .                  | .                  | Gorai.003G082900.1 | . | .           | . |
| .                  | .                  | .                  | .                  | .                  | . | .           | . |
| Vv02g0080          | .                  | .                  | .                  | Gorai.007G104600.1 | . | .           | . |
| .                  | Vv015rg0268        | .                  | .                  | .                  | . | .           | . |
| .                  | .                  | .                  | .                  | .                  | . | .           | . |
| Vv02g0081          | Tc03_g028330       | .                  | Gorai.004G136500.1 | .                  | . | .           | . |
| Gorai.007G104700.1 | .                  | Gorai.008G251400.1 | .                  | .                  | . | Vv015rg0269 | . |
| .                  | .                  | .                  | .                  | .                  | . | .           | . |
| Vv02g0082          | Tc03_g028340       | .                  | .                  | .                  | . | Gorai.      | . |
| 008G251500.1       | .                  | .                  | .                  | .                  | . | .           | . |
| .                  | .                  | .                  | .                  | .                  | . | .           | . |
| Vv02g0083          | Tc03_g028350       | .                  | .                  | .                  | . | Gorai.      | . |
| 008G251600.1       | .                  | .                  | .                  | .                  | . | .           | . |
| .                  | .                  | .                  | .                  | .                  | . | .           | . |
| Vv02g0084          | .                  | .                  | .                  | .                  | . | .           | . |
| .                  | .                  | .                  | .                  | .                  | . | .           | . |
| .                  | .                  | .                  | .                  | .                  | . | .           | . |
| Vv02g0085          | Tc03_g028360       | .                  | .                  | Gorai.007G025100.1 | . | .           | . |
| .                  | Gorai.008G251700.1 | .                  | .                  | Vv015rg0271        | . | .           | . |
| .                  | .                  | .                  | .                  | .                  | . | .           | . |
| Vv02g0086          | .                  | .                  | .                  | .                  | . | .           | . |
| .                  | .                  | .                  | .                  | .                  | . | .           | . |
| .                  | .                  | .                  | .                  | .                  | . | .           | . |
| Vv02g0087          | Tc03_g028380       | .                  | .                  | .                  | . | Gorai.      | . |
| 008G251800.1       | .                  | .                  | .                  | .                  | . | .           | . |
| .                  | .                  | .                  | .                  | .                  | . | .           | . |
| Vv02g0088          | .                  | .                  | .                  | .                  | . | .           | . |
| .                  | .                  | .                  | .                  | .                  | . | .           | . |
| .                  | .                  | .                  | .                  | .                  | . | .           | . |
| Vv02g0089          | .                  | .                  | .                  | .                  | . | .           | . |
| .                  | .                  | .                  | .                  | .                  | . | .           | . |
| .                  | .                  | .                  | .                  | .                  | . | .           | . |
| Vv02g0090          | Tc03_g028390       | .                  | .                  | Gorai.003G082700.1 | . | .           | . |
| .                  | .                  | .                  | .                  | .                  | . | .           | . |

|           |              |  |                    |                    |  |  |
|-----------|--------------|--|--------------------|--------------------|--|--|
| Vv02g0091 |              |  |                    |                    |  |  |
| Vv02g0092 |              |  |                    |                    |  |  |
| Vv02g0093 | Tc03_g028400 |  |                    |                    |  |  |
| Vv02g0094 |              |  |                    |                    |  |  |
| Vv02g0095 |              |  |                    |                    |  |  |
| Vv02g0096 |              |  |                    |                    |  |  |
| Vv02g0097 |              |  |                    |                    |  |  |
| Vv02g0098 |              |  |                    |                    |  |  |
| Vv02g0099 |              |  |                    |                    |  |  |
| Vv02g0100 |              |  |                    |                    |  |  |
| Vv02g0101 |              |  |                    |                    |  |  |
| Vv02g0102 |              |  |                    |                    |  |  |
| Vv02g0103 |              |  |                    |                    |  |  |
| Vv02g0104 |              |  |                    |                    |  |  |
| Vv02g0105 |              |  |                    | Gorai.007G014300.1 |  |  |
| Vv02g0106 |              |  |                    |                    |  |  |
| Vv02g0107 | Tc03_g028410 |  | Gorai.004G136000.1 |                    |  |  |

|                    |                    |                    |                    |
|--------------------|--------------------|--------------------|--------------------|
| Gorai.007G105200.1 | Gorai.008G252000.1 | .                  | Vv015rg0277        |
| .                  | .                  | .                  | .                  |
| Vv02g0108          | Tc03_g028420       | Gorai.003G082600.1 | .                  |
| .                  | .                  | .                  | .                  |
| Vv02g0109          | Tc03_g028430       | Gorai.004G135900.1 | Gorai.             |
| 003G082500.1       | Gorai.008G252200.1 | .                  | Vv015rg0280        |
| .                  | .                  | .                  | .                  |
| Vv02g0110          | Tc03_g028450       | Gorai.004G135700.1 | Gorai.             |
| 003G082200.1       | Gorai.007G105700.1 | Gorai.008G271200.1 | .                  |
| Gorai.006G208200.1 | .                  | .                  | .                  |
| .                  | .                  | .                  | .                  |
| Vv02g0111          | Tc03_g028460       | .                  | .                  |
| .                  | .                  | .                  | .                  |
| .                  | .                  | .                  | .                  |
| Vv02g0112          | .                  | .                  | .                  |
| .                  | .                  | .                  | .                  |
| .                  | .                  | .                  | .                  |
| Vv02g0113          | Tc03_g028480       | .                  | Gorai.             |
| 008G252500.1       | Vv015rg0285        | .                  | .                  |
| .                  | .                  | .                  | .                  |
| .                  | .                  | .                  | .                  |
| Vv02g0114          | Tc03_g028500       | Gorai.004G135500.1 | .                  |
| Gorai.007G106200.1 | .                  | Gorai.006G208100.1 | .                  |
| .                  | .                  | .                  | .                  |
| .                  | .                  | .                  | .                  |
| Vv02g0115          | Tc03_g028510       | .                  | Gorai.007G106300.1 |
| Gorai.008G252600.1 | .                  | .                  | .                  |
| .                  | .                  | .                  | .                  |
| .                  | .                  | .                  | .                  |
| Vv02g0116          | Tc03_g028520       | Gorai.003G082000.1 | .                  |
| .                  | .                  | .                  | .                  |
| .                  | .                  | .                  | .                  |
| Vv02g0117          | Tc03_g028530       | .                  | Gorai.007G025400.1 |
| .                  | .                  | .                  | .                  |
| .                  | .                  | .                  | .                  |
| Vv02g0118          | .                  | .                  | .                  |
| .                  | .                  | .                  | .                  |
| .                  | .                  | .                  | .                  |
| Vv02g0119          | .                  | .                  | .                  |
| .                  | .                  | .                  | .                  |
| .                  | .                  | .                  | .                  |
| Vv02g0120          | Tc03_g028550       | Gorai.004G135400.1 | Gorai.             |
| 003G081700.1       | .                  | Gorai.006G207900.1 | .                  |
| .                  | .                  | .                  | .                  |
| .                  | .                  | .                  | .                  |
| Vv02g0121          | Tc03_g028560       | Gorai.004G135200.1 | .                  |
| Gorai.007G106400.1 | Gorai.008G252700.1 | .                  | .                  |

|                    |                    |                    |                    |   |   |   |
|--------------------|--------------------|--------------------|--------------------|---|---|---|
| .                  | .                  | .                  | .                  | . | . | . |
| Vv02g0122          | Tc03_g028580       | .                  | Gorai.003G081600.1 | . | . | . |
| Gorai.007G106800.1 | .                  | .                  | Vv015rg0292        | . | . | . |
| .                  | .                  | .                  | .                  | . | . | . |
| Vv02g0123          | Tc03_g028590       | Gorai.004G135000.1 | Gorai.             | . | . | . |
| 003G081500.1       | .                  | .                  | Vv015rg0294        | . | . | . |
| .                  | .                  | .                  | .                  | . | . | . |
| Vv02g0124          | .                  | .                  | .                  | . | . | . |
| .                  | .                  | .                  | .                  | . | . | . |
| Vv02g0125          | Tc03_g028600       | .                  | Gorai.007G025500.1 | . | . | . |
| .                  | .                  | .                  | .                  | . | . | . |
| Vv02g0126          | Tc03_g028620       | .                  | Gorai.003G081400.1 | . | . | . |
| Gorai.008G252900.1 | .                  | .                  | .                  | . | . | . |
| .                  | .                  | .                  | .                  | . | . | . |
| Vv02g0127          | Tc03_g028630       | Gorai.004G134900.1 | Gorai.             | . | . | . |
| 003G081300.1       | Gorai.008G253000.1 | .                  | .                  | . | . | . |
| .                  | .                  | .                  | .                  | . | . | . |
| Vv02g0128          | Tc03_g028650       | .                  | .                  | . | . | . |
| .                  | .                  | .                  | .                  | . | . | . |
| Vv02g0129          | Tc03_g028670       | .                  | Gorai.             | . | . | . |
| 008G253100.1       | .                  | .                  | .                  | . | . | . |
| .                  | .                  | .                  | .                  | . | . | . |
| Vv02g0130          | Tc03_g028680       | Gorai.004G134800.1 | .                  | . | . | . |
| Gorai.007G107200.1 | Gorai.008G253200.1 | .                  | .                  | . | . | . |
| .                  | .                  | .                  | .                  | . | . | . |
| Vv02g0131          | Tc03_g028690       | Gorai.004G134700.1 | .                  | . | . | . |
| .                  | .                  | .                  | .                  | . | . | . |
| Vv02g0132          | Tc03_g028700       | Gorai.004G134600.1 | .                  | . | . | . |
| Gorai.007G014600.1 | Gorai.008G270600.1 | .                  | Vv015rg0302        | . | . | . |
| .                  | .                  | .                  | .                  | . | . | . |
| Vv02g0133          | Tc03_g028780       | .                  | Gorai.007G025600.1 | . | . | . |
| .                  | .                  | .                  | .                  | . | . | . |
| Vv02g0134          | Tc03_g028790       | .                  | Gorai.007G025800.1 | . | . | . |
| Gorai.008G253500.1 | .                  | .                  | .                  | . | . | . |
| .                  | .                  | .                  | .                  | . | . | . |
| Vv02g0135          | Tc03_g028800       | Gorai.004G134300.1 | .                  | . | . | . |
| .                  | .                  | .                  | .                  | . | . | . |

|                    |                    |                    |        |   |   |             |   |
|--------------------|--------------------|--------------------|--------|---|---|-------------|---|
| Vv02g0136          | .                  | .                  | .      | . | . | .           | . |
| .                  | .                  | .                  | .      | . | . | .           | . |
| Vv02g0137          | Tc03_g028820       | Gorai.004G134000.1 | .      | . | . | .           | . |
| Gorai.007G026000.1 | .                  | .                  | .      | . | . | .           | . |
| .                  | .                  | .                  | .      | . | . | .           | . |
| Vv02g0138          | Tc03_g028830       | Gorai.004G133900.1 | .      | . | . | .           | . |
| Gorai.007G026100.1 | Gorai.008G270200.1 | .                  | .      | . | . | Vv015rg0310 | . |
| .                  | .                  | .                  | .      | . | . | .           | . |
| Vv02g0139          | Tc03_g028840       | .                  | .      | . | . | Gorai.      | . |
| 008G253800.1       | .                  | .                  | .      | . | . | .           | . |
| .                  | .                  | .                  | .      | . | . | .           | . |
| Vv02g0140          | Tc03_g028850       | Gorai.004G133800.1 | .      | . | . | .           | . |
| Gorai.007G026200.1 | Gorai.008G253900.1 | Gorai.006G207800.1 | .      | . | . | .           | . |
| .                  | .                  | .                  | .      | . | . | .           | . |
| Vv02g0141          | Tc03_g028860       | Gorai.003G080900.1 | .      | . | . | .           | . |
| .                  | Gorai.006G207700.1 | .                  | .      | . | . | .           | . |
| .                  | .                  | .                  | .      | . | . | .           | . |
| Vv02g0142          | .                  | .                  | .      | . | . | .           | . |
| .                  | .                  | .                  | .      | . | . | .           | . |
| Vv02g0143          | Tc03_g028870       | Gorai.004G133700.1 | Gorai. | . | . | .           | . |
| 003G080800.1       | Gorai.008G254000.1 | .                  | .      | . | . | .           | . |
| .                  | .                  | .                  | .      | . | . | .           | . |
| Vv02g0144          | Tc03_g028880       | Gorai.003G080700.1 | .      | . | . | .           | . |
| Gorai.008G270000.1 | .                  | .                  | .      | . | . | .           | . |
| .                  | .                  | .                  | .      | . | . | .           | . |
| Vv02g0145          | Tc03_g028890       | Gorai.003G080600.1 | .      | . | . | .           | . |
| .                  | .                  | .                  | .      | . | . | .           | . |
| Vv02g0146          | Tc03_g028900       | Gorai.003G080500.1 | .      | . | . | .           | . |
| Gorai.007G026300.1 | Gorai.008G254100.1 | .                  | .      | . | . | .           | . |
| .                  | .                  | .                  | .      | . | . | .           | . |
| Vv02g0147          | Tc03_g028910       | Gorai.003G080300.1 | .      | . | . | .           | . |
| Gorai.007G026600.1 | Gorai.008G254200.1 | .                  | .      | . | . | .           | . |
| .                  | .                  | .                  | .      | . | . | .           | . |
| Vv02g0148          | Tc03_g028930       | Gorai.004G133400.1 | Gorai. | . | . | .           | . |
| 003G080000.1       | Gorai.007G014700.1 | Gorai.008G254300.1 | .      | . | . | .           | . |
| .                  | .                  | .                  | .      | . | . | .           | . |
| Vv02g0149          | Tc03_g028960       | .                  | .      | . | . | Gorai.      | . |

|              |                    |                    |   |   |   |             |   |
|--------------|--------------------|--------------------|---|---|---|-------------|---|
| 008G254400.1 | .                  | .                  | . | . | . | .           | . |
| Vv02g0150    | .                  | .                  | . | . | . | .           | . |
| Vv02g0151    | Tc03_g028990       | .                  | . | . | . | Gorai.      | . |
| 008G254600.1 | .                  | .                  | . | . | . | .           | . |
| Vv02g0152    | Tc03_g029000       | .                  | . | . | . | .           | . |
| Vv02g0153    | .                  | .                  | . | . | . | .           | . |
| Vv02g0154    | Tc03_g029010       | Gorai.004G132800.1 | . | . | . | .           | . |
|              | Gorai.008G254700.1 | .                  | . | . | . | .           | . |
| Vv02g0155    | .                  | .                  | . | . | . | .           | . |
| Vv02g0156    | Tc03_g029020       | .                  | . | . | . | Gorai.      | . |
| 008G254800.1 | Gorai.006G207600.1 | .                  | . | . | . | .           | . |
| Vv02g0157    | .                  | .                  | . | . | . | .           | . |
| Vv02g0158    | .                  | .                  | . | . | . | .           | . |
| Vv02g0159    | Tc03_g029040       | .                  | . | . | . | Gorai.      | . |
| 008G255000.1 | .                  | .                  | . | . | . | .           | . |
| Vv02g0160    | .                  | .                  | . | . | . | .           | . |
| Vv02g0161    | .                  | .                  | . | . | . | .           | . |
| Vv02g0162    | Tc03_g029050       | Gorai.004G132700.1 | . | . | . | .           | . |
|              | Gorai.006G207400.1 | .                  | . | . | . | .           | . |
| Vv02g0163    | Tc03_g029060       | Gorai.004G132600.1 | . | . | . | .           | . |
|              | Gorai.008G255100.1 | Gorai.006G207300.1 | . | . | . | Vv0Unrg2991 | . |
| Vv02g0164    | .                  | Gorai.003G078800.1 | . | . | . | .           | . |



|                    |                    |                    |                    |   |
|--------------------|--------------------|--------------------|--------------------|---|
| Vv02g0165          | Tc03_g029100       | Gorai.004G132500.1 | .                  | . |
|                    | Gorai.008G269100.1 | .                  | .                  | . |
| .                  | .                  | .                  | .                  | . |
| Vv02g0166          | Tc03_g029120       | Gorai.003G078700.1 | .                  | . |
|                    | Gorai.008G266400.1 | .                  | .                  | . |
| .                  | .                  | .                  | .                  | . |
| Vv02g0167          | Tc03_g029130       | Gorai.004G132400.1 | Gorai.             | . |
| 003G078600.1       | Gorai.007G108300.1 | Gorai.008G255600.1 | .                  | . |
|                    | Vv0Unrg2994        | .                  | .                  | . |
|                    | Vv16g0644          | .                  | Gorai.007G108300.1 | . |
|                    | Gorai.008G255200.1 | .                  | .                  | . |
| Vv02g0168          | Tc03_g029140       | .                  | .                  | . |
| Gorai.006G207200.1 | .                  | .                  | .                  | . |
| .                  | .                  | .                  | .                  | . |
| Vv02g0169          | Tc03_g029150       | Gorai.007G015400.1 | .                  | . |
|                    | Gorai.008G255800.1 | Gorai.006G207100.1 | .                  | . |
| .                  | .                  | .                  | .                  | . |
| Vv02g0170          | Tc03_g029160       | .                  | Gorai.             | . |
| 008G255900.1       | .                  | .                  | .                  | . |
| .                  | .                  | .                  | .                  | . |
| Vv02g0171          | Tc03_g012780       | Gorai.004G132300.1 | .                  | . |
| .                  | .                  | .                  | .                  | . |
| .                  | .                  | .                  | .                  | . |
| Vv02g0172          | Tc03_g029170       | .                  | .                  | . |
| .                  | .                  | .                  | .                  | . |
| .                  | .                  | .                  | .                  | . |
| Vv02g0173          | .                  | Gorai.007G108500.1 | .                  | . |
| .                  | Vv0Unrg2997        | .                  | .                  | . |
| .                  | Vv16g0639          | Tc03_g020910       | .                  | . |
| Gorai.007G108500.1 | .                  | .                  | .                  | . |
| Vv02g0174          | Tc03_g029190       | Gorai.003G078500.1 | .                  | . |
| .                  | .                  | .                  | .                  | . |
| .                  | .                  | .                  | .                  | . |
| Vv02g0175          | Tc03_g029200       | Gorai.003G078400.1 | .                  | . |
|                    | Gorai.008G256000.1 | Gorai.006G207000.1 | .                  | . |
| .                  | .                  | .                  | .                  | . |
| .                  | .                  | .                  | .                  | . |
| Vv02g0176          | Tc03_g029210       | .                  | Gorai.             | . |
| 008G256100.1       | .                  | .                  | .                  | . |
| .                  | .                  | .                  | .                  | . |
| Vv02g0177          | Tc03_g029220       | Gorai.003G078300.1 | .                  | . |
| Gorai.007G109200.1 | .                  | .                  | .                  | . |
| .                  | .                  | .                  | .                  | . |
| .                  | .                  | .                  | .                  | . |
| Vv02g0178          | .                  | .                  | .                  | . |
| .                  | .                  | .                  | .                  | . |

|           |                    |                    |   |   |
|-----------|--------------------|--------------------|---|---|
| Vv02g0179 | Tc03_g029260       | Gorai.004G131900.1 | . | . |
|           | Gorai.008G256200.1 | .                  | . | . |
| Vv02g0180 | .                  | .                  | . | . |
| Vv02g0181 | Gorai.004G131800.1 | .                  | . | . |
| Vv02g0182 | Tc03_g029270       | .                  | . | . |
| Vv02g0183 | Tc03_g029280       | Gorai.003G078000.1 | . | . |
|           | Gorai.007G026900.1 | Vv0Unrg3009        | . | . |
| Vv02g0184 | .                  | .                  | . | . |
| Vv02g0185 | Tc03_g029290       | Gorai.007G027000.1 | . | . |
|           | Gorai.008G256300.1 | .                  | . | . |
| Vv02g0186 | .                  | .                  | . | . |
| Vv02g0187 | .                  | .                  | . | . |
| Vv02g0188 | Tc03_g029300       | .                  | . | . |
|           | Gorai.006G206800.1 | .                  | . | . |
| Vv02g0189 | Tc03_g029310       | .                  | . | . |
| Vv02g0190 | .                  | .                  | . | . |
| Vv02g0191 | .                  | .                  | . | . |
| Vv02g0192 | Tc03_g029320       | .                  | . | . |
|           | Gorai.006G206700.1 | .                  | . | . |
| Vv02g0193 | .                  | .                  | . | . |
| Vv02g0194 | Tc03_g029330       | .                  | . | . |

|                    |              |   |   |                    |   |        |   |
|--------------------|--------------|---|---|--------------------|---|--------|---|
| .                  | .            | . | . | .                  | . | .      | . |
| .                  | .            | . | . | .                  | . | .      | . |
| Vv02g0195          | .            | . | . | .                  | . | .      | . |
| .                  | .            | . | . | .                  | . | .      | . |
| .                  | .            | . | . | .                  | . | .      | . |
| Vv02g0196          | Tc03_g029340 | . | . | .                  | . | .      | . |
| Gorai.006G206600.1 | .            | . | . | .                  | . | .      | . |
| .                  | .            | . | . | .                  | . | .      | . |
| Vv02g0197          | .            | . | . | .                  | . | .      | . |
| .                  | .            | . | . | .                  | . | .      | . |
| .                  | .            | . | . | .                  | . | .      | . |
| Vv02g0198          | Tc03_g012860 | . | . | Gorai.003G104000.1 | . | .      | . |
| .                  | .            | . | . | .                  | . | .      | . |
| .                  | .            | . | . | .                  | . | .      | . |
| Vv02g0199          | .            | . | . | .                  | . | .      | . |
| .                  | .            | . | . | .                  | . | .      | . |
| .                  | .            | . | . | .                  | . | .      | . |
| Vv02g0200          | .            | . | . | .                  | . | .      | . |
| .                  | .            | . | . | .                  | . | .      | . |
| .                  | .            | . | . | .                  | . | .      | . |
| Vv02g0201          | .            | . | . | .                  | . | .      | . |
| .                  | .            | . | . | .                  | . | .      | . |
| .                  | .            | . | . | .                  | . | .      | . |
| Vv02g0202          | .            | . | . | .                  | . | .      | . |
| .                  | .            | . | . | .                  | . | .      | . |
| .                  | .            | . | . | .                  | . | .      | . |
| Vv02g0203          | .            | . | . | .                  | . | .      | . |
| .                  | .            | . | . | .                  | . | .      | . |
| .                  | .            | . | . | .                  | . | .      | . |
| Vv02g0204          | .            | . | . | .                  | . | .      | . |
| .                  | .            | . | . | .                  | . | .      | . |
| .                  | .            | . | . | .                  | . | .      | . |
| Vv02g0205          | .            | . | . | .                  | . | .      | . |
| .                  | .            | . | . | .                  | . | .      | . |
| .                  | .            | . | . | .                  | . | .      | . |
| Vv02g0206          | .            | . | . | .                  | . | .      | . |
| .                  | .            | . | . | .                  | . | .      | . |
| .                  | .            | . | . | .                  | . | .      | . |
| Vv02g0207          | Tc03_g029350 | . | . | .                  | . | Gorai. | . |
| 008G256400.1       | .            | . | . | .                  | . | .      | . |
| .                  | .            | . | . | .                  | . | .      | . |
| Vv02g0208          | .            | . | . | .                  | . | .      | . |
| .                  | .            | . | . | .                  | . | .      | . |
| .                  | .            | . | . | .                  | . | .      | . |
| Vv02g0209          | .            | . | . | .                  | . | .      | . |
| .                  | .            | . | . | .                  | . | .      | . |
| .                  | .            | . | . | .                  | . | .      | . |
| Vv02g0210          | .            | . | . | .                  | . | .      | . |
| .                  | .            | . | . | .                  | . | .      | . |
| .                  | .            | . | . | .                  | . | .      | . |

|                    |                    |                    |                    |   |   |           |   |
|--------------------|--------------------|--------------------|--------------------|---|---|-----------|---|
| Vv02g0211          | .                  | .                  | .                  | . | . | .         | . |
| .                  | .                  | .                  | .                  | . | . | .         | . |
| Vv02g0212          | Tc03_g029370       | Gorai.004G131700.1 | .                  | . | . | .         | . |
| .                  | Gorai.006G206500.1 | .                  | .                  | . | . | .         | . |
| .                  | .                  | .                  | .                  | . | . | .         | . |
| Vv02g0213          | .                  | .                  | .                  | . | . | Vv16g0627 | . |
| .                  | Tc03_g021060       | Gorai.003G121600.1 | .                  | . | . | .         | . |
| .                  | .                  | .                  | .                  | . | . | .         | . |
| Vv02g0214          | Tc03_g029390       | Gorai.004G131600.1 | Gorai.             | . | . | .         | . |
| 003G119400.1       | Gorai.008G256600.1 | .                  | .                  | . | . | .         | . |
| .                  | .                  | .                  | .                  | . | . | .         | . |
| Vv02g0215          | Tc03_g029400       | .                  | Gorai.007G110100.1 | . | . | .         | . |
| .                  | Gorai.006G206300.1 | Vv0Unrg3017        | .                  | . | . | .         | . |
| .                  | .                  | Vv16g0621          | .                  | . | . | .         | . |
| Tc03_g021120       | .                  | .                  | .                  | . | . | .         | . |
| Vv02g0216          | Tc03_g029420       | .                  | .                  | . | . | .         | . |
| .                  | .                  | .                  | .                  | . | . | .         | . |
| Vv02g0217          | Tc03_g029430       | Gorai.004G131400.1 | .                  | . | . | .         | . |
| Gorai.007G020600.1 | .                  | Vv16g0613          | Tc03_g021180       | . | . | .         | . |
| .                  | .                  | .                  | .                  | . | . | .         | . |
| Vv02g0218          | Tc03_g029440       | Gorai.004G131300.1 | .                  | . | . | .         | . |
| .                  | .                  | .                  | .                  | . | . | .         | . |
| Vv02g0219          | .                  | .                  | .                  | . | . | .         | . |
| .                  | .                  | .                  | .                  | . | . | .         | . |
| Vv02g0220          | Tc03_g029500       | Gorai.004G131200.1 | .                  | . | . | .         | . |
| .                  | .                  | .                  | .                  | . | . | .         | . |
| Vv02g0221          | .                  | .                  | .                  | . | . | .         | . |
| .                  | .                  | .                  | .                  | . | . | .         | . |
| Vv02g0222          | Tc03_g029590       | .                  | Gorai.007G020500.1 | . | . | .         | . |
| .                  | .                  | .                  | .                  | . | . | .         | . |
| Vv02g0223          | Tc03_g029600       | Gorai.004G131000.1 | .                  | . | . | .         | . |
| Gorai.007G020400.1 | .                  | .                  | .                  | . | . | .         | . |
| .                  | .                  | .                  | .                  | . | . | .         | . |
| Vv02g0224          | .                  | .                  | Gorai.008G256700.1 | . | . | .         | . |
| .                  | .                  | .                  | .                  | . | . | .         | . |
| Vv02g0225          | Tc03_g029670       | Gorai.004G130900.1 | .                  | . | . | .         | . |
| .                  | .                  | .                  | .                  | . | . | .         | . |

|                    |              |                    |             |                    |                    |                    |   |
|--------------------|--------------|--------------------|-------------|--------------------|--------------------|--------------------|---|
| Vv02g0226          | .            | .                  | .           | .                  | .                  | .                  | . |
| .                  | .            | .                  | .           | .                  | .                  | .                  | . |
| Vv02g0227          | .            | .                  | .           | Gorai.003G122000.1 | .                  | Gorai.             | . |
| 007G020200.1       | .            | .                  | .           | .                  | .                  | .                  | . |
| .                  | .            | .                  | .           | .                  | .                  | .                  | . |
| Vv02g0228          | .            | .                  | .           | .                  | .                  | .                  | . |
| .                  | .            | .                  | .           | .                  | .                  | .                  | . |
| Vv02g0229          | Tc03_g012980 | .                  | .           | Gorai.003G076400.1 | .                  | .                  | . |
| Gorai.008G256800.1 | .            | .                  | .           | Gorai.006G206100.1 | .                  | Vv0Unrg3026        | . |
| .                  | .            | .                  | .           | .                  | .                  | Vv16g0603          | . |
| Tc03_g021260       | .            | .                  | .           | .                  | .                  | Gorai.008G267000.1 | . |
| .                  | .            | .                  | .           | .                  | .                  | .                  | . |
| Vv02g0230          | .            | Gorai.004G130600.1 | .           | .                  | .                  | .                  | . |
| Gorai.008G256900.1 | .            | .                  | Vv0Unrg3027 | .                  | .                  | .                  | . |
| .                  | .            | .                  | .           | .                  | .                  | .                  | . |
| Vv02g0231          | .            | .                  | .           | .                  | Gorai.008G257000.1 | .                  | . |
| .                  | .            | .                  | .           | .                  | .                  | .                  | . |
| Vv02g0232          | .            | .                  | .           | .                  | .                  | .                  | . |
| .                  | .            | .                  | .           | .                  | .                  | .                  | . |
| Vv02g0233          | .            | Gorai.004G130500.1 | .           | .                  | Gorai.003G076000.1 | .                  | . |
| .                  | .            | .                  | .           | .                  | .                  | .                  | . |
| .                  | .            | .                  | .           | .                  | .                  | .                  | . |
| Vv02g0234          | .            | Gorai.004G130400.1 | .           | .                  | Gorai.003G075900.1 | .                  | . |
| .                  | .            | .                  | Vv0Unrg3028 | .                  | .                  | .                  | . |
| .                  | .            | .                  | .           | .                  | .                  | .                  | . |
| Vv02g0235          | .            | .                  | .           | .                  | Gorai.008G257100.1 | .                  | . |
| .                  | .            | .                  | .           | .                  | .                  | .                  | . |
| Vv02g0236          | .            | .                  | .           | .                  | .                  | .                  | . |
| .                  | .            | .                  | .           | .                  | .                  | .                  | . |
| Vv02g0237          | .            | .                  | .           | .                  | .                  | .                  | . |
| .                  | .            | .                  | .           | .                  | .                  | .                  | . |
| Vv02g0238          | .            | .                  | .           | Gorai.003G075800.1 | .                  | .                  | . |
| Gorai.008G257200.1 | .            | .                  | .           | .                  | .                  | .                  | . |
| .                  | .            | .                  | .           | .                  | .                  | .                  | . |
| Vv02g0239          | .            | .                  | .           | .                  | .                  | .                  | . |
| .                  | .            | .                  | .           | .                  | .                  | .                  | . |
| .                  | .            | .                  | .           | .                  | .                  | .                  | . |

|                    |                    |                    |                    |                    |   |                    |   |   |
|--------------------|--------------------|--------------------|--------------------|--------------------|---|--------------------|---|---|
| Vv02g0240          | .                  | .                  | .                  | .                  | . | .                  | . | . |
| .                  | .                  | .                  | .                  | .                  | . | .                  | . | . |
| Vv02g0241          | .                  | Gorai.004G130300.1 | .                  | Gorai.003G122200.1 | . | Gorai.003G122200.1 | . | . |
| .                  | Gorai.008G257400.1 | .                  | .                  | Vv0Unrg3035        | . | Vv16g0599          | . | . |
| .                  | .                  | .                  | .                  | Gorai.007G016100.1 | . | .                  | . | . |
| Tc03_g021300       | .                  | Gorai.003G122200.1 | .                  | .                  | . | .                  | . | . |
| .                  | Gorai.008G257400.1 | .                  | .                  | .                  | . | .                  | . | . |
| Vv02g0242          | .                  | Gorai.004G130200.1 | .                  | .                  | . | .                  | . | . |
| .                  | .                  | .                  | .                  | .                  | . | .                  | . | . |
| Vv16g0597          | .                  | .                  | .                  | Gorai.007G016300.1 | . | .                  | . | . |
| .                  | .                  | .                  | .                  | .                  | . | .                  | . | . |
| Vv02g0243          | .                  | .                  | .                  | Gorai.008G257500.1 | . | .                  | . | . |
| .                  | .                  | .                  | .                  | .                  | . | .                  | . | . |
| Vv02g0244          | .                  | .                  | Gorai.003G075500.1 | .                  | . | .                  | . | . |
| .                  | Vv0Unrg3068        | .                  | .                  | .                  | . | .                  | . | . |
| .                  | .                  | .                  | .                  | .                  | . | .                  | . | . |
| Vv02g0245          | .                  | Gorai.004G130100.1 | .                  | .                  | . | .                  | . | . |
| Gorai.008G266400.1 | .                  | Vv16g0591          | .                  | Tc03_g021390       | . | .                  | . | . |
| .                  | Gorai.007G016500.1 | Gorai.008G266400.1 | .                  | .                  | . | .                  | . | . |
| .                  | .                  | .                  | .                  | .                  | . | .                  | . | . |
| Vv02g0246          | .                  | .                  | Gorai.003G075400.1 | .                  | . | .                  | . | . |
| .                  | .                  | .                  | .                  | .                  | . | .                  | . | . |
| Vv02g0247          | .                  | .                  | .                  | Gorai.008G257700.1 | . | .                  | . | . |
| .                  | Gorai.006G206000.1 | .                  | .                  | .                  | . | .                  | . | . |
| .                  | .                  | .                  | .                  | .                  | . | .                  | . | . |
| Vv02g0248          | .                  | .                  | .                  | Gorai.008G257800.1 | . | .                  | . | . |
| .                  | .                  | .                  | .                  | .                  | . | .                  | . | . |
| Vv02g0249          | Tc03_g025990       | .                  | Gorai.003G072400.1 | .                  | . | .                  | . | . |
| .                  | .                  | .                  | .                  | .                  | . | .                  | . | . |
| Vv02g0250          | .                  | .                  | .                  | .                  | . | .                  | . | . |
| .                  | .                  | .                  | .                  | .                  | . | .                  | . | . |
| Vv02g0251          | Tc03_g029770       | .                  | .                  | .                  | . | .                  | . | . |
| .                  | .                  | .                  | .                  | .                  | . | .                  | . | . |
| Vv02g0252          | .                  | .                  | .                  | .                  | . | .                  | . | . |
| .                  | .                  | .                  | .                  | .                  | . | .                  | . | . |
| Vv02g0253          | .                  | Gorai.004G129900.1 | .                  | .                  | . | .                  | . | . |
| Gorai.008G258200.1 | .                  | .                  | .                  | .                  | . | .                  | . | . |
| .                  | .                  | .                  | .                  | .                  | . | .                  | . | . |
| .                  | .                  | .                  | .                  | .                  | . | .                  | . | . |
| Vv02g0254          | .                  | Gorai.003G122700.1 | .                  | Gorai.             | . | .                  | . | . |
| .                  | Vv16g0585          | Tc03_g021450       | .                  | .                  | . | .                  | . | . |

|                    |                    |                    |                    |                    |                    |   |   |
|--------------------|--------------------|--------------------|--------------------|--------------------|--------------------|---|---|
| 003G122700.1       | .                  | .                  | .                  | .                  | .                  | . | . |
| .                  | .                  | .                  | .                  | .                  | .                  | . | . |
| Vv02g0255          | .                  | .                  | .                  | .                  | .                  | . | . |
| .                  | .                  | .                  | .                  | .                  | .                  | . | . |
| Vv02g0256          | .                  | .                  | .                  | .                  | .                  | . | . |
| .                  | .                  | .                  | .                  | .                  | .                  | . | . |
| Vv02g0257          | .                  | Gorai.004G129800.1 | .                  | .                  | .                  | . | . |
| Gorai.006G205900.1 | .                  | .                  | .                  | .                  | .                  | . | . |
| .                  | .                  | .                  | .                  | .                  | .                  | . | . |
| Vv02g0258          | .                  | .                  | .                  | Gorai.007G020000.1 | .                  | . | . |
| Gorai.008G258300.1 | .                  | .                  | Vv16g0582          | Tc03_g021470       | .                  | . | . |
| .                  | Gorai.007G016600.1 | .                  | Gorai.008G258300.1 | .                  | .                  | . | . |
| Vv02g0259          | .                  | .                  | .                  | Gorai.007G019900.1 | .                  | . | . |
| .                  | .                  | .                  | .                  | .                  | .                  | . | . |
| Vv02g0260          | .                  | .                  | .                  | Gorai.007G019800.1 | .                  | . | . |
| .                  | .                  | .                  | .                  | .                  | .                  | . | . |
| Vv02g0261          | .                  | .                  | .                  | .                  | Gorai.008G258500.1 | . | . |
| Gorai.006G205700.1 | .                  | .                  | .                  | .                  | .                  | . | . |
| .                  | .                  | .                  | .                  | .                  | .                  | . | . |
| Vv02g0262          | Tc03_g026270       | .                  | .                  | .                  | .                  | . | . |
| .                  | .                  | .                  | .                  | .                  | .                  | . | . |
| Vv02g0263          | .                  | .                  | .                  | .                  | Gorai.008G258800.1 | . | . |
| .                  | .                  | .                  | .                  | .                  | .                  | . | . |
| Vv02g0264          | Tc03_g029890       | .                  | .                  | Gorai.007G111400.1 | .                  | . | . |
| Gorai.008G258900.1 | .                  | .                  | Vv15g0552          | .                  | .                  | . | . |
| Tc01_g033980       | .                  | .                  | .                  | .                  | Vv16g0578          | . | . |
| Tc03_g021520       | .                  | .                  | Gorai.007G111400.1 | .                  | .                  | . | . |
| Gorai.008G258900.1 | .                  | .                  | .                  | .                  | .                  | . | . |
| Vv02g0265          | .                  | .                  | .                  | .                  | Gorai.             | . | . |
| 006G205600.1       | .                  | .                  | .                  | .                  | .                  | . | . |
| Vv02g0266          | .                  | .                  | .                  | .                  | .                  | . | . |
| .                  | .                  | .                  | .                  | .                  | .                  | . | . |
| Vv02g0267          | Tc03_g015710       | Gorai.004G129600.1 | .                  | .                  | .                  | . | . |
| Gorai.007G111800.1 | Gorai.008G259000.1 | .                  | .                  | .                  | .                  | . | . |
| .                  | .                  | .                  | .                  | .                  | .                  | . | . |
| Vv02g0268          | .                  | .                  | Gorai.007G019700.1 | .                  | .                  | . | . |
| Gorai.008G259100.1 | Gorai.006G205500.1 | .                  | .                  | .                  | .                  | . | . |
| .                  | .                  | .                  | .                  | .                  | .                  | . | . |

|                    |              |                    |   |           |                    |                    |   |
|--------------------|--------------|--------------------|---|-----------|--------------------|--------------------|---|
| Vv02g0269          | .            | .                  | . | .         | .                  | .                  | . |
| .                  | .            | .                  | . | .         | .                  | .                  | . |
| Vv02g0270          | .            | .                  | . | .         | .                  | .                  | . |
| .                  | .            | .                  | . | .         | .                  | .                  | . |
| Vv02g0271          | .            | .                  | . | .         | .                  | .                  | . |
| .                  | .            | .                  | . | .         | .                  | .                  | . |
| Vv02g0272          | .            | .                  | . | .         | Gorai.007G019200.1 | .                  | . |
| Gorai.008G259300.1 | .            | .                  | . | .         | .                  | .                  | . |
| .                  | .            | .                  | . | .         | .                  | .                  | . |
| Vv02g0273          | .            | .                  | . | .         | .                  | Gorai.008G259400.1 | . |
| Gorai.006G205400.1 | .            | .                  | . | .         | .                  | .                  | . |
| .                  | .            | .                  | . | .         | .                  | .                  | . |
| Vv02g0274          | .            | .                  | . | .         | .                  | .                  | . |
| .                  | .            | .                  | . | .         | .                  | .                  | . |
| Vv02g0275          | .            | .                  | . | .         | .                  | Gorai.007G019100.1 | . |
| Gorai.008G259600.1 | .            | .                  | . | Vv15g0531 | Tc01_g033790       | .                  | . |
| .                  | .            | .                  | . | Vv16g0567 | .                  | .                  | . |
| Tc03_g021610       | .            | .                  | . | .         | .                  | .                  | . |
| Vv02g0276          | .            | Gorai.004G129300.1 | . | .         | .                  | .                  | . |
| .                  | .            | .                  | . | .         | .                  | .                  | . |
| Vv02g0277          | Tc03_g015490 | .                  | . | .         | .                  | Gorai.007G043900.1 | . |
| .                  | .            | .                  | . | .         | .                  | .                  | . |
| Vv02g0278          | .            | Gorai.004G129100.1 | . | .         | .                  | Gorai.             | . |
| 007G112600.1       | .            | Gorai.006G205200.1 | . | .         | Vv15g0527          | .                  | . |
| Tc01_g033750       | .            | .                  | . | .         | .                  | .                  | . |
| .                  | .            | .                  | . | .         | .                  | .                  | . |
| Vv02g0279          | .            | .                  | . | .         | .                  | .                  | . |
| .                  | .            | .                  | . | .         | .                  | .                  | . |
| Vv02g0280          | .            | Gorai.004G129000.1 | . | .         | .                  | .                  | . |
| .                  | .            | .                  | . | .         | .                  | .                  | . |
| Vv02g0281          | .            | Gorai.004G128900.1 | . | .         | .                  | Gorai.             | . |
| 007G016900.1       | .            | .                  | . | .         | .                  | .                  | . |
| .                  | .            | .                  | . | .         | .                  | .                  | . |
| Vv02g0282          | .            | .                  | . | .         | .                  | .                  | . |
| .                  | .            | .                  | . | .         | .                  | .                  | . |
| Vv02g0283          | .            | .                  | . | .         | .                  | Gorai.008G259800.1 | . |
| .                  | .            | .                  | . | .         | .                  | .                  | . |



|                    |                    |   |   |                    |   |                    |           |
|--------------------|--------------------|---|---|--------------------|---|--------------------|-----------|
| Vv02g0284          | .                  | . | . | .                  | . | .                  | Gorai.    |
| 006G205100.1       | .                  | . | . | .                  | . | .                  | .         |
| Vv02g0285          | .                  | . | . | .                  | . | Gorai.008G259900.1 | .         |
| .                  | .                  | . | . | .                  | . | .                  | .         |
| Vv02g0286          | .                  | . | . | .                  | . | .                  | .         |
| .                  | .                  | . | . | .                  | . | .                  | .         |
| Vv02g0287          | .                  | . | . | .                  | . | .                  | Vv16g0559 |
| Tc03_g021690       | .                  | . | . | .                  | . | .                  | .         |
| Vv02g0288          | .                  | . | . | .                  | . | .                  | Gorai.    |
| 006G205000.1       | .                  | . | . | .                  | . | .                  | .         |
| Vv02g0289          | .                  | . | . | .                  | . | Gorai.004G128700.1 | .         |
| Gorai.008G260100.1 | .                  | . | . | .                  | . | .                  | .         |
| .                  | .                  | . | . | .                  | . | .                  | .         |
| Vv02g0290          | .                  | . | . | .                  | . | .                  | .         |
| .                  | .                  | . | . | .                  | . | .                  | .         |
| Vv02g0291          | .                  | . | . | .                  | . | .                  | .         |
| .                  | .                  | . | . | .                  | . | .                  | .         |
| Vv02g0292          | .                  | . | . | .                  | . | Gorai.008G265200.1 | .         |
| Gorai.006G204800.1 | .                  | . | . | .                  | . | .                  | .         |
| .                  | .                  | . | . | .                  | . | .                  | .         |
| Vv02g0293          | Tc03_g017700       | . | . | Gorai.003G156200.1 | . | .                  | .         |
| Gorai.007G014300.1 | Gorai.008G260300.1 | . | . | Gorai.006G204700.1 | . | .                  | .         |
| .                  | .                  | . | . | .                  | . | .                  | .         |
| Vv02g0294          | .                  | . | . | .                  | . | .                  | .         |
| .                  | .                  | . | . | .                  | . | .                  | .         |
| Vv02g0295          | Tc03_g026320       | . | . | .                  | . | .                  | .         |
| .                  | .                  | . | . | .                  | . | .                  | .         |
| Vv02g0296          | Tc03_g026330       | . | . | .                  | . | .                  | .         |
| .                  | .                  | . | . | .                  | . | .                  | .         |
| Vv02g0297          | Tc03_g026340       | . | . | .                  | . | .                  | .         |
| .                  | .                  | . | . | .                  | . | .                  | .         |
| Vv02g0298          | .                  | . | . | .                  | . | .                  | .         |
| .                  | .                  | . | . | .                  | . | .                  | .         |
| Vv02g0299          | .                  | . | . | .                  | . | .                  | .         |

|              |                    |                    |   |   |                    |   |   |
|--------------|--------------------|--------------------|---|---|--------------------|---|---|
| .            | .                  | .                  | . | . | .                  | . | . |
| .            | .                  | .                  | . | . | .                  | . | . |
| Vv02g0300    | .                  | Gorai.004G128400.1 | . | . | .                  | . | . |
| .            | Vv15g0513          | .                  | . | . | .                  | . | . |
| .            | .                  | .                  | . | . | .                  | . | . |
| Vv02g0301    | .                  | .                  | . | . | .                  | . | . |
| .            | .                  | .                  | . | . | .                  | . | . |
| .            | .                  | .                  | . | . | .                  | . | . |
| Vv02g0302    | .                  | .                  | . | . | Gorai.008G264900.1 | . | . |
| .            | Vv15g0510          | Tc01_g033590       | . | . | .                  | . | . |
| .            | Vv16g0545          | .                  | . | . | .                  | . | . |
| .            | Gorai.008G260600.1 | .                  | . | . | .                  | . | . |
| Vv02g0303    | .                  | .                  | . | . | Gorai.008G260800.1 | . | . |
| .            | Vv15g0506          | Tc01_g033580       | . | . | .                  | . | . |
| .            | Vv16g0544          | Tc03_g021850       | . | . | .                  | . | . |
| .            | Gorai.008G260800.1 | .                  | . | . | .                  | . | . |
| Vv02g0304    | Tc03_g026420       | .                  | . | . | .                  | . | . |
| .            | .                  | .                  | . | . | .                  | . | . |
| .            | .                  | .                  | . | . | .                  | . | . |
| Vv02g0305    | .                  | .                  | . | . | .                  | . | . |
| .            | .                  | .                  | . | . | .                  | . | . |
| .            | .                  | .                  | . | . | .                  | . | . |
| Vv02g0306    | .                  | .                  | . | . | .                  | . | . |
| Vv15g0499    | Tc01_g033530       | .                  | . | . | .                  | . | . |
| .            | .                  | .                  | . | . | .                  | . | . |
| Vv02g0307    | .                  | .                  | . | . | .                  | . | . |
| .            | .                  | .                  | . | . | .                  | . | . |
| .            | .                  | .                  | . | . | .                  | . | . |
| Vv02g0308    | .                  | Gorai.004G128200.1 | . | . | Gorai.             | . | . |
| 007G114200.1 | Gorai.008G261100.1 | .                  | . | . | .                  | . | . |
| .            | .                  | .                  | . | . | .                  | . | . |
| .            | .                  | .                  | . | . | .                  | . | . |
| Vv02g0309    | Tc03_g015160       | Gorai.004G128100.1 | . | . | .                  | . | . |
| .            | Gorai.008G261300.1 | Gorai.006G204300.1 | . | . | Vv16g0538          | . | . |
| .            | Tc03_g021910       | .                  | . | . | Gorai.008G264000.1 | . | . |
| .            | .                  | .                  | . | . | .                  | . | . |
| Vv02g0310    | .                  | .                  | . | . | .                  | . | . |
| .            | .                  | .                  | . | . | .                  | . | . |
| .            | .                  | .                  | . | . | .                  | . | . |
| Vv02g0311    | Tc03_g010850       | .                  | . | . | .                  | . | . |
| .            | .                  | .                  | . | . | .                  | . | . |
| .            | .                  | .                  | . | . | .                  | . | . |
| Vv02g0312    | .                  | .                  | . | . | Gorai.008G261500.1 | . | . |
| .            | .                  | .                  | . | . | .                  | . | . |
| .            | .                  | .                  | . | . | .                  | . | . |
| Vv02g0313    | .                  | .                  | . | . | .                  | . | . |
| .            | .                  | .                  | . | . | .                  | . | . |
| .            | .                  | .                  | . | . | .                  | . | . |
| Vv02g0314    | .                  | .                  | . | . | .                  | . | . |
| .            | .                  | .                  | . | . | .                  | . | . |

|                    |              |                    |   |                    |   |
|--------------------|--------------|--------------------|---|--------------------|---|
| Vv02g0315          | Tc03_g017330 | .                  | . | .                  | . |
| Gorai.006G204000.1 | .            | .                  | . | .                  | . |
| Vv02g0316          | .            | .                  | . | .                  | . |
| .                  | .            | .                  | . | .                  | . |
| Vv02g0317          | .            | .                  | . | Gorai.008G262200.1 | . |
| .                  | .            | .                  | . | .                  | . |
| Vv02g0318          | .            | .                  | . | Gorai.008G262100.1 | . |
| .                  | Vv04g1420    | Tc01_g010700       | . | .                  | . |
| .                  | .            | .                  | . | .                  | . |
| Vv02g0319          | .            | .                  | . | .                  | . |
| .                  | .            | .                  | . | .                  | . |
| Vv02g0320          | .            | .                  | . | .                  | . |
| .                  | .            | .                  | . | .                  | . |
| Vv02g0321          | .            | .                  | . | .                  | . |
| Vv04g1446          | .            | .                  | . | .                  | . |
| .                  | .            | .                  | . | .                  | . |
| Vv02g0322          | .            | .                  | . | .                  | . |
| Vv04g1448          | .            | .                  | . | .                  | . |
| .                  | .            | .                  | . | .                  | . |
| Vv02g0323          | .            | .                  | . | .                  | . |
| .                  | .            | .                  | . | .                  | . |
| Vv02g0324          | .            | Gorai.004G127800.1 | . | .                  | . |
| Gorai.008G261900.1 | .            | .                  | . | .                  | . |
| .                  | .            | .                  | . | .                  | . |
| Vv02g0325          | .            | .                  | . | .                  | . |
| .                  | .            | .                  | . | .                  | . |
| Vv02g0326          | Tc03_g026700 | .                  | . | Gorai.             | . |
| 008G261800.1       | .            | .                  | . | .                  | . |
| .                  | .            | .                  | . | .                  | . |
| Vv02g0327          | .            | .                  | . | .                  | . |
| Vv04g1449          | .            | .                  | . | .                  | . |
| .                  | .            | .                  | . | .                  | . |
| Vv02g0328          | .            | .                  | . | Gorai.008G261600.1 | . |
| .                  | .            | .                  | . | .                  | . |
| Vv02g0329          | .            | Gorai.004G156600.1 | . | .                  | . |
| .                  | .            | .                  | . | .                  | . |
| .                  | .            | .                  | . | .                  | . |
| Vv02g0330          | .            | .                  | . | Gorai.008G262300.1 | . |
| .                  | .            | .                  | . | .                  | . |

|              |                    |   |                    |                    |                    |                    |
|--------------|--------------------|---|--------------------|--------------------|--------------------|--------------------|
| Vv02g0331    | .                  | . | .                  | .                  | .                  | Gorai.008G262400.1 |
| .            | .                  | . | .                  | .                  | .                  | .                  |
| .            | Vv08g1307          | . | Tc05_g008470       | .                  | .                  | Gorai.             |
| 002G242000.1 | Gorai.002G159600.1 | . | .                  | .                  | .                  | Vv04g1456          |
| .            | Tc01_g010810       | . | .                  | .                  | .                  | .                  |
| Vv02g0332    | Tc03_g027840       | . | .                  | .                  | .                  | Gorai.007G102100.1 |
| .            | Gorai.008G249300.1 | . | Gorai.006G201000.1 | .                  | .                  | .                  |
| .            | .                  | . | .                  | .                  | .                  | .                  |
| .            | .                  | . | .                  | .                  | .                  | .                  |
| Vv02g0333    | Tc03_g010630       | . | .                  | .                  | .                  | .                  |
| .            | .                  | . | .                  | .                  | .                  | .                  |
| .            | .                  | . | .                  | .                  | .                  | .                  |
| Vv02g0334    | .                  | . | .                  | .                  | .                  | .                  |
| .            | .                  | . | .                  | .                  | .                  | .                  |
| .            | .                  | . | .                  | .                  | .                  | .                  |
| Vv02g0335    | Tc03_g017180       | . | Gorai.004G126900.1 | .                  | .                  | .                  |
| .            | .                  | . | .                  | .                  | .                  | .                  |
| .            | .                  | . | .                  | .                  | .                  | .                  |
| Vv02g0336    | .                  | . | .                  | .                  | .                  | .                  |
| .            | .                  | . | .                  | .                  | .                  | .                  |
| .            | .                  | . | .                  | .                  | .                  | .                  |
| Vv02g0337    | Tc03_g027640       | . | Gorai.004G213400.1 | .                  | .                  | Gorai.             |
| 003G157400.1 | .                  | . | .                  | .                  | .                  | .                  |
| .            | .                  | . | .                  | .                  | .                  | .                  |
| .            | .                  | . | .                  | .                  | .                  | .                  |
| Vv02g0338    | Tc03_g027630       | . | .                  | Gorai.003G157500.1 | .                  | .                  |
| .            | Gorai.008G275500.1 | . | .                  | .                  | .                  | .                  |
| .            | .                  | . | .                  | .                  | .                  | .                  |
| .            | .                  | . | .                  | .                  | .                  | .                  |
| Vv02g0339    | Tc03_g027620       | . | .                  | Gorai.003G157600.1 | .                  | .                  |
| .            | Gorai.008G247800.1 | . | .                  | .                  | .                  | .                  |
| .            | .                  | . | .                  | .                  | .                  | .                  |
| .            | .                  | . | .                  | .                  | .                  | .                  |
| Vv02g0340    | .                  | . | .                  | Gorai.007G011700.1 | .                  | .                  |
| .            | .                  | . | .                  | .                  | .                  | .                  |
| .            | .                  | . | .                  | .                  | .                  | .                  |
| Vv02g0341    | Tc03_g027610       | . | Gorai.004G213300.1 | .                  | .                  | .                  |
| .            | .                  | . | .                  | .                  | .                  | .                  |
| .            | .                  | . | .                  | .                  | .                  | .                  |
| Vv02g0342    | .                  | . | .                  | .                  | .                  | .                  |
| .            | .                  | . | .                  | .                  | .                  | .                  |
| .            | .                  | . | .                  | .                  | .                  | .                  |
| Vv02g0343    | .                  | . | .                  | .                  | .                  | .                  |
| .            | .                  | . | .                  | .                  | .                  | .                  |
| .            | .                  | . | .                  | .                  | .                  | .                  |
| Vv02g0344    | .                  | . | .                  | .                  | Gorai.008G261500.1 | .                  |
| .            | .                  | . | .                  | .                  | .                  | .                  |
| .            | .                  | . | .                  | .                  | .                  | .                  |
| Vv02g0345    | .                  | . | .                  | .                  | Gorai.008G258500.1 | .                  |
| .            | .                  | . | .                  | .                  | .                  | .                  |

|                    |                    |                    |              |   |
|--------------------|--------------------|--------------------|--------------|---|
| Vv02g0346          | Tc03_g027590       | Gorai.004G213200.1 | .            | . |
| .                  | .                  | .                  | .            | . |
| Vv02g0347          | Tc03_g027580       | Gorai.004G213100.1 | Gorai.       | . |
| 003G158000.1       | .                  | .                  | .            | . |
| .                  | .                  | .                  | .            | . |
| Vv02g0348          | Tc03_g027570       | Gorai.004G212800.1 | Gorai.       | . |
| 003G158100.1       | Gorai.007G100000.1 | .                  | .            | . |
| .                  | .                  | .                  | .            | . |
| Vv02g0349          | Tc03_g027560       | Gorai.004G158800.1 | Gorai.       | . |
| 003G158200.1       | Gorai.007G011300.1 | Gorai.008G276400.1 | .            | . |
| .                  | .                  | .                  | .            | . |
| Vv02g0350          | Tc03_g027540       | Gorai.003G158300.1 | .            | . |
| Gorai.008G247200.1 | .                  | .                  | .            | . |
| .                  | .                  | .                  | .            | . |
| Vv02g0351          | Tc03_g027530       | .                  | Gorai.       | . |
| 008G247100.1       | .                  | .                  | .            | . |
| .                  | .                  | .                  | .            | . |
| Vv02g0352          | Tc03_g027520       | Gorai.004G212300.1 | Gorai.       | . |
| 003G158400.1       | .                  | Vv04g1461          | Tc01_g010880 | . |
| .                  | .                  | .                  | .            | . |
| Gorai.007G063500.1 | .                  | .                  | .            | . |
| Vv02g0353          | Tc03_g027510       | .                  | .            | . |
| .                  | .                  | .                  | .            | . |
| .                  | .                  | .                  | .            | . |
| Vv02g0354          | Tc03_g027500       | Gorai.004G212200.1 | .            | . |
| Gorai.007G023500.1 | .                  | .                  | .            | . |
| .                  | .                  | .                  | .            | . |
| Vv02g0355          | Tc03_g027490       | Gorai.003G158500.1 | .            | . |
| .                  | .                  | .                  | .            | . |
| .                  | .                  | .                  | .            | . |
| Vv02g0356          | .                  | .                  | .            | . |
| .                  | .                  | .                  | .            | . |
| .                  | .                  | .                  | .            | . |
| Vv02g0357          | Tc03_g027470       | Gorai.003G158800.1 | .            | . |
| Gorai.008G247000.1 | .                  | .                  | .            | . |
| .                  | .                  | .                  | .            | . |
| .                  | .                  | .                  | .            | . |
| Vv02g0358          | Tc03_g027450       | .                  | .            | . |
| Gorai.006G209300.1 | .                  | .                  | .            | . |
| .                  | .                  | .                  | .            | . |
| Vv02g0359          | Tc03_g027440       | Gorai.004G212100.1 | Gorai.       | . |
| 003G158900.1       | .                  | .                  | .            | . |
| .                  | .                  | .                  | .            | . |

|                    |                    |                    |           |
|--------------------|--------------------|--------------------|-----------|
| Vv02g0360          | Tc03_g027430       | Gorai.004G212000.1 | .         |
| Gorai.007G023400.1 | .                  | .                  | .         |
| .                  | .                  | .                  | .         |
| Vv02g0361          | Tc03_g027400       | Gorai.003G159000.1 | .         |
| .                  | .                  | .                  | .         |
| Vv02g0362          | .                  | .                  | .         |
| .                  | .                  | .                  | .         |
| Vv02g0363          | Tc03_g027390       | .                  | .         |
| Gorai.006G209400.1 | .                  | .                  | .         |
| .                  | .                  | .                  | .         |
| Vv02g0364          | Tc03_g027380       | Gorai.004G211800.1 | Gorai.    |
| 003G159100.1       | .                  | .                  | .         |
| .                  | .                  | .                  | .         |
| Vv02g0365          | Tc03_g027370       | .                  | Gorai.    |
| 008G246800.1       | Gorai.006G209500.1 | .                  | .         |
| .                  | .                  | .                  | .         |
| Vv02g0366          | .                  | .                  | .         |
| .                  | .                  | .                  | .         |
| Vv02g0367          | Tc03_g027360       | Gorai.004G211700.1 | .         |
| .                  | .                  | .                  | .         |
| Vv02g0368          | .                  | .                  | .         |
| .                  | .                  | .                  | .         |
| Vv02g0369          | Tc03_g027350       | Gorai.004G211600.1 | .         |
| .                  | .                  | .                  | .         |
| .                  | .                  | .                  | .         |
| Vv02g0370          | Tc03_g027340       | Gorai.004G161300.1 | .         |
| Gorai.007G098600.1 | Gorai.008G246700.1 | .                  | Vv08g1334 |
| Tc05_g008170       | Gorai.006G158700.1 | .                  | Gorai.    |
| 002G160000.1       | Gorai.009G408800.1 | .                  | .         |
| .                  | .                  | .                  | .         |
| Vv02g0371          | Tc03_g027330       | .                  | Gorai.    |
| 008G246600.1       | .                  | .                  | .         |
| .                  | .                  | .                  | .         |
| Vv02g0372          | Tc03_g027320       | Gorai.004G211400.1 | .         |
| Gorai.008G246400.1 | .                  | .                  | .         |
| .                  | .                  | .                  | .         |
| Vv02g0373          | Tc03_g027310       | Gorai.004G211300.1 | .         |
| Gorai.007G007000.1 | .                  | Vv08g1362          | .         |
| Tc05_g007810       | Gorai.006G159600.1 | Gorai.002G244600.1 | .         |
| .                  | .                  | .                  | .         |

|                    |                    |                    |        |        |
|--------------------|--------------------|--------------------|--------|--------|
| Vv02g0374          | .                  | Gorai.004G157900.1 | .      | Gorai. |
| 007G098200.1       | .                  | .                  | .      | .      |
| .                  | .                  | .                  | .      | .      |
| Vv02g0375          | Tc03_g027300       | Gorai.004G211100.1 | .      | .      |
| Gorai.007G023300.1 | Gorai.008G246300.1 | .                  | .      | .      |
| .                  | .                  | .                  | .      | .      |
| Vv02g0376          | .                  | .                  | .      | .      |
| .                  | .                  | .                  | .      | .      |
| Vv02g0377          | .                  | .                  | .      | .      |
| .                  | .                  | .                  | .      | .      |
| Vv02g0378          | .                  | .                  | .      | .      |
| .                  | .                  | .                  | .      | .      |
| Vv02g0379          | .                  | .                  | .      | .      |
| .                  | .                  | .                  | .      | .      |
| Vv02g0380          | .                  | .                  | .      | .      |
| .                  | .                  | .                  | .      | .      |
| Vv02g0381          | .                  | .                  | .      | .      |
| .                  | .                  | .                  | .      | .      |
| Vv02g0382          | .                  | .                  | .      | .      |
| .                  | .                  | .                  | .      | .      |
| Vv02g0383          | Tc03_g027280       | .                  | .      | .      |
| .                  | .                  | .                  | .      | .      |
| Vv02g0384          | Gorai.004G210800.1 | .                  | .      | .      |
| .                  | .                  | .                  | .      | .      |
| Vv02g0385          | Tc03_g027270       | Gorai.004G210700.1 | .      | .      |
| .                  | .                  | .                  | .      | .      |
| Vv02g0386          | Tc03_g027260       | .                  | .      | Gorai. |
| 008G246100.1       | Vv08g1368          | .                  | .      | .      |
| Gorai.009G410300.1 | .                  | .                  | .      | .      |
| .                  | .                  | .                  | .      | .      |
| Vv02g0387          | Tc03_g027250       | Gorai.004G210600.1 | Gorai. | .      |
| 003G159400.1       | .                  | .                  | .      | .      |
| .                  | .                  | .                  | .      | .      |
| Vv02g0388          | Tc03_g027230       | .                  | .      | .      |
| Gorai.006G209700.1 | .                  | .                  | .      | .      |
| .                  | .                  | .                  | .      | .      |

|                    |                    |                    |                    |
|--------------------|--------------------|--------------------|--------------------|
| Vv02g0389          | Tc03_g027220       | Gorai.004G210200.1 | Gorai.             |
| 003G159600.1       | .                  | Gorai.006G209800.1 | .                  |
| .                  | .                  | .                  | .                  |
| .                  | .                  | .                  | .                  |
| Vv02g0390          | Tc03_g027210       | Gorai.004G157700.1 | .                  |
| Gorai.007G097900.1 | Gorai.008G277100.1 | .                  | .                  |
| .                  | .                  | .                  | .                  |
| .                  | .                  | .                  | .                  |
| Vv02g0391          | .                  | Gorai.004G210100.1 | .                  |
| .                  | .                  | .                  | .                  |
| .                  | .                  | .                  | .                  |
| Vv02g0392          | Tc03_g027190       | .                  | Gorai.             |
| 008G245600.1       | .                  | .                  | .                  |
| .                  | .                  | .                  | .                  |
| Vv02g0393          | Tc03_g027180       | .                  | .                  |
| .                  | .                  | .                  | .                  |
| .                  | .                  | .                  | .                  |
| Vv02g0394          | Tc03_g027170       | Gorai.004G210000.1 | .                  |
| Gorai.008G277700.1 | .                  | .                  | .                  |
| .                  | .                  | .                  | .                  |
| .                  | .                  | .                  | .                  |
| Vv02g0395          | .                  | Gorai.003G160000.1 | .                  |
| .                  | .                  | .                  | .                  |
| .                  | .                  | .                  | .                  |
| Vv02g0396          | Tc03_g027140       | Gorai.004G209900.1 | .                  |
| .                  | .                  | .                  | .                  |
| .                  | .                  | .                  | .                  |
| Vv02g0397          | .                  | .                  | .                  |
| .                  | .                  | .                  | .                  |
| .                  | .                  | .                  | .                  |
| Vv02g0398          | Tc03_g027120       | .                  | Gorai.007G097700.1 |
| Gorai.008G245400.1 | .                  | .                  | .                  |
| .                  | .                  | .                  | .                  |
| .                  | .                  | .                  | .                  |
| Vv02g0399          | Tc03_g027080       | .                  | .                  |
| Vv08g1377          | .                  | .                  | .                  |
| .                  | .                  | .                  | .                  |
| Vv02g0400          | .                  | .                  | .                  |
| .                  | .                  | .                  | .                  |
| .                  | .                  | .                  | .                  |
| Vv02g0401          | .                  | .                  | .                  |
| .                  | .                  | .                  | .                  |
| .                  | .                  | .                  | .                  |
| Vv02g0402          | .                  | .                  | .                  |
| .                  | .                  | .                  | .                  |
| .                  | .                  | .                  | .                  |
| Vv02g0403          | Tc03_g013540       | .                  | .                  |
| .                  | .                  | .                  | .                  |
| .                  | .                  | .                  | .                  |
| Vv02g0404          | .                  | .                  | .                  |



|              |                    |  |                    |  |                    |  |
|--------------|--------------------|--|--------------------|--|--------------------|--|
| Vv02g0405    |                    |  |                    |  |                    |  |
| Vv02g0406    |                    |  |                    |  |                    |  |
| Vv02g0407    | Tc03_g027060       |  | Gorai.004G209400.1 |  |                    |  |
| Vv02g0408    |                    |  |                    |  |                    |  |
| Vv02g0409    |                    |  |                    |  |                    |  |
| Vv08g1378    | Tc05_g030100       |  |                    |  | Gorai.             |  |
| 009G410800.1 |                    |  |                    |  |                    |  |
| Vv02g0410    |                    |  |                    |  |                    |  |
| Vv02g0411    |                    |  | Gorai.004G164100.1 |  |                    |  |
| Vv02g0412    |                    |  |                    |  |                    |  |
| Vv02g0413    |                    |  | Gorai.004G157300.1 |  | Gorai.003G160200.1 |  |
|              | Gorai.007G023100.1 |  | Gorai.008G245300.1 |  |                    |  |
| Vv02g0414    |                    |  |                    |  |                    |  |
| Vv02g0415    |                    |  |                    |  |                    |  |
| Vv02g0416    | Tc03_g013620       |  |                    |  | Gorai.007G041400.1 |  |
| Vv02g0417    |                    |  |                    |  |                    |  |
| Vv02g0418    | Tc03_g013660       |  |                    |  |                    |  |
| Vv02g0419    |                    |  |                    |  |                    |  |
| Vv02g0420    | Tc03_g027050       |  |                    |  |                    |  |

|              |   |                    |                    |                    |                    |        |   |
|--------------|---|--------------------|--------------------|--------------------|--------------------|--------|---|
| .            | . | .                  | .                  | .                  | .                  | .      | . |
| .            | . | .                  | .                  | .                  | .                  | .      | . |
| Vv02g0421    | . | .                  | .                  | .                  | .                  | Gorai. | . |
| 006G210000.1 | . | .                  | .                  | .                  | .                  | .      | . |
| .            | . | .                  | .                  | .                  | .                  | .      | . |
| Vv02g0422    | . | .                  | .                  | .                  | .                  | .      | . |
| .            | . | .                  | .                  | .                  | .                  | .      | . |
| .            | . | .                  | .                  | .                  | .                  | .      | . |
| Vv02g0423    | . | .                  | .                  | .                  | .                  | .      | . |
| .            | . | .                  | .                  | .                  | .                  | .      | . |
| .            | . | .                  | .                  | .                  | .                  | .      | . |
| Vv02g0424    | . | .                  | .                  | .                  | .                  | .      | . |
| .            | . | .                  | .                  | .                  | .                  | .      | . |
| .            | . | .                  | .                  | .                  | .                  | .      | . |
| Vv02g0425    | . | .                  | .                  | .                  | .                  | .      | . |
| .            | . | .                  | .                  | .                  | .                  | .      | . |
| .            | . | .                  | .                  | .                  | .                  | .      | . |
| Vv02g0426    | . | Gorai.004G154600.1 | .                  | .                  | .                  | .      | . |
| .            | . | .                  | .                  | .                  | .                  | .      | . |
| .            | . | .                  | .                  | .                  | .                  | .      | . |
| Vv02g0427    | . | .                  | .                  | .                  | .                  | .      | . |
| .            | . | .                  | .                  | .                  | .                  | .      | . |
| .            | . | .                  | .                  | .                  | .                  | .      | . |
| Vv02g0428    | . | .                  | .                  | .                  | .                  | .      | . |
| .            | . | .                  | .                  | .                  | .                  | .      | . |
| .            | . | .                  | .                  | .                  | .                  | .      | . |
| Vv02g0429    | . | .                  | .                  | .                  | .                  | .      | . |
| .            | . | .                  | .                  | .                  | .                  | .      | . |
| .            | . | .                  | .                  | .                  | .                  | .      | . |
| Vv02g0430    | . | .                  | .                  | .                  | Gorai.008G279300.1 | .      | . |
| .            | . | .                  | .                  | .                  | .                  | .      | . |
| .            | . | .                  | .                  | .                  | .                  | .      | . |
| Vv02g0431    | . | .                  | .                  | .                  | .                  | .      | . |
| .            | . | .                  | .                  | .                  | .                  | .      | . |
| .            | . | .                  | .                  | .                  | .                  | .      | . |
| Vv02g0432    | . | .                  | .                  | .                  | .                  | .      | . |
| .            | . | .                  | .                  | .                  | .                  | .      | . |
| .            | . | .                  | .                  | .                  | .                  | .      | . |
| Vv02g0433    | . | .                  | .                  | Gorai.007G096300.1 | .                  | .      | . |
| .            | . | .                  | .                  | .                  | .                  | .      | . |
| .            | . | .                  | .                  | .                  | .                  | .      | . |
| Vv02g0434    | . | .                  | Gorai.003G160900.1 | .                  | .                  | .      | . |
| .            | . | .                  | .                  | .                  | .                  | .      | . |
| .            | . | .                  | .                  | .                  | .                  | .      | . |
| Vv02g0435    | . | Gorai.004G208800.1 | .                  | .                  | Gorai.             | .      | . |
| 007G010900.1 | . | .                  | .                  | .                  | .                  | .      | . |
| .            | . | .                  | .                  | .                  | .                  | .      | . |
| .            | . | .                  | .                  | .                  | .                  | .      | . |
| Vv02g0436    | . | .                  | .                  | .                  | .                  | .      | . |
| .            | . | .                  | .                  | .                  | .                  | .      | . |

|              |              |   |   |                    |                    |   |
|--------------|--------------|---|---|--------------------|--------------------|---|
| Vv02g0437    | .            | . | . | .                  | .                  | . |
| Vv08g1380    | Tc05_g007620 | . | . | .                  | .                  | . |
| Vv02g0438    | .            | . | . | .                  | Gorai.008G244600.1 | . |
| .            | .            | . | . | .                  | .                  | . |
| Vv02g0439    | .            | . | . | .                  | .                  | . |
| .            | .            | . | . | .                  | .                  | . |
| Vv02g0440    | Tc03_g027030 | . | . | .                  | .                  | . |
| .            | .            | . | . | .                  | .                  | . |
| Vv02g0441    | .            | . | . | .                  | .                  | . |
| .            | .            | . | . | .                  | .                  | . |
| Vv02g0442    | .            | . | . | .                  | .                  | . |
| .            | .            | . | . | .                  | .                  | . |
| Vv02g0443    | .            | . | . | .                  | .                  | . |
| .            | .            | . | . | .                  | .                  | . |
| Vv02g0444    | Tc03_g027020 | . | . | .                  | Gorai.             | . |
| 008G245000.1 | .            | . | . | .                  | .                  | . |
| Vv02g0445    | Tc03_g027010 | . | . | .                  | .                  | . |
| .            | .            | . | . | .                  | .                  | . |
| Vv02g0446    | Tc03_g027000 | . | . | .                  | Gorai.             | . |
| 008G244900.1 | .            | . | . | .                  | .                  | . |
| Vv02g0447    | .            | . | . | .                  | .                  | . |
| .            | .            | . | . | .                  | .                  | . |
| Vv02g0448    | .            | . | . | .                  | .                  | . |
| .            | .            | . | . | .                  | .                  | . |
| Vv02g0449    | Tc03_g026990 | . | . | .                  | .                  | . |
| .            | .            | . | . | .                  | .                  | . |
| Vv02g0450    | Tc03_g026980 | . | . | .                  | Gorai.             | . |
| 008G244800.1 | .            | . | . | .                  | .                  | . |
| Vv02g0451    | Tc03_g026960 | . | . | .                  | Gorai.             | . |
| 008G244700.1 | .            | . | . | .                  | .                  | . |
| Vv02g0452    | .            | . | . | .                  | .                  | . |
| Vv08g1409    | .            | . | . | .                  | .                  | . |
| Vv02g0453    | .            | . | . | Gorai.007G022600.1 | .                  | . |

|                    |                    |                    |                    |                    |        |   |   |
|--------------------|--------------------|--------------------|--------------------|--------------------|--------|---|---|
| .                  | .                  | .                  | .                  | .                  | .      | . | . |
| .                  | .                  | .                  | .                  | .                  | .      | . | . |
| Vv02g0454          | Tc03_g013700       | .                  | .                  | .                  | .      | . | . |
| .                  | .                  | .                  | .                  | .                  | .      | . | . |
| .                  | .                  | .                  | .                  | .                  | .      | . | . |
| Vv02g0455          | Tc03_g013710       | .                  | .                  | .                  | .      | . | . |
| .                  | .                  | .                  | .                  | .                  | .      | . | . |
| .                  | .                  | .                  | .                  | .                  | .      | . | . |
| Vv02g0456          | Tc03_g026760       | Gorai.004G208300.1 | .                  | .                  | .      | . | . |
| Gorai.007G095600.1 | Gorai.008G279800.1 | Gorai.006G210100.1 | .                  | .                  | .      | . | . |
| .                  | .                  | .                  | .                  | .                  | .      | . | . |
| .                  | .                  | .                  | .                  | .                  | .      | . | . |
| Vv02g0457          | Tc03_g026750       | .                  | .                  | Gorai.007G010500.1 | .      | . | . |
| Gorai.008G280000.1 | .                  | .                  | .                  | .                  | .      | . | . |
| .                  | .                  | .                  | .                  | .                  | .      | . | . |
| .                  | .                  | .                  | .                  | .                  | .      | . | . |
| Vv02g0458          | Tc03_g026740       | .                  | .                  | Gorai.007G022300.1 | .      | . | . |
| .                  | .                  | .                  | .                  | .                  | .      | . | . |
| .                  | .                  | .                  | .                  | .                  | .      | . | . |
| Vv02g0459          | .                  | .                  | .                  | .                  | .      | . | . |
| .                  | .                  | .                  | .                  | .                  | .      | . | . |
| .                  | .                  | .                  | .                  | .                  | .      | . | . |
| Vv02g0460          | Tc03_g026720       | .                  | .                  | .                  | Gorai. | . | . |
| 008G243800.1       | .                  | .                  | .                  | .                  | .      | . | . |
| .                  | .                  | .                  | .                  | .                  | .      | . | . |
| Vv02g0461          | Tc03_g026700       | Gorai.004G208000.1 | Gorai.             | .                  | .      | . | . |
| 003G162600.1       | Gorai.007G010200.1 | Gorai.008G243700.1 | .                  | .                  | .      | . | . |
| Gorai.006G197200.1 | .                  | .                  | .                  | .                  | .      | . | . |
| .                  | .                  | .                  | .                  | .                  | .      | . | . |
| Vv02g0462          | Tc03_g026690       | .                  | Gorai.003G162700.1 | .                  | .      | . | . |
| Gorai.007G010100.1 | Gorai.008G280600.1 | .                  | .                  | .                  | .      | . | . |
| .                  | .                  | .                  | .                  | .                  | .      | . | . |
| .                  | .                  | .                  | .                  | .                  | .      | . | . |
| Vv02g0463          | .                  | .                  | .                  | .                  | .      | . | . |
| .                  | .                  | .                  | .                  | .                  | .      | . | . |
| .                  | .                  | .                  | .                  | .                  | .      | . | . |
| Vv02g0464          | .                  | .                  | .                  | .                  | .      | . | . |
| .                  | .                  | .                  | .                  | .                  | .      | . | . |
| .                  | .                  | .                  | .                  | .                  | .      | . | . |
| Vv02g0465          | Tc03_g026680       | Gorai.004G207700.1 | .                  | .                  | .      | . | . |
| Gorai.008G243500.1 | .                  | Vv15g0351          | .                  | .                  | .      | . | . |
| .                  | .                  | .                  | .                  | .                  | .      | . | . |
| .                  | .                  | .                  | .                  | .                  | .      | . | . |
| Vv02g0466          | .                  | .                  | .                  | .                  | .      | . | . |
| .                  | .                  | .                  | .                  | .                  | .      | . | . |
| .                  | .                  | .                  | .                  | .                  | .      | . | . |
| Vv02g0467          | Tc03_g026670       | .                  | .                  | .                  | .      | . | . |
| Gorai.006G210200.1 | Vv15g0352          | .                  | .                  | .                  | Gorai. | . | . |
| 008G116300.1       | .                  | Gorai.004G156100.1 | .                  | .                  | .      | . | . |
| .                  | .                  | .                  | .                  | .                  | .      | . | . |

|                    |                    |                    |                    |
|--------------------|--------------------|--------------------|--------------------|
| Vv02g0468          | Tc03_g026660       | Gorai.004G207600.1 | Gorai.             |
| 003G162800.1       | .                  | .                  | .                  |
| .                  | .                  | .                  | .                  |
| Vv02g0469          | .                  | .                  | .                  |
| .                  | .                  | .                  | .                  |
| Vv02g0470          | Tc03_g026650       | .                  | .                  |
| .                  | .                  | .                  | .                  |
| Vv02g0471          | Tc03_g030620       | .                  | .                  |
| .                  | .                  | .                  | .                  |
| Vv02g0472          | Tc03_g026630       | Gorai.004G207300.1 | .                  |
| Gorai.007G022200.1 | .                  | .                  | .                  |
| .                  | .                  | .                  | .                  |
| Vv02g0473          | Tc03_g026620       | .                  | Gorai.003G162900.1 |
| Gorai.008G243400.1 | .                  | Gorai.008G243400.1 | Vv15g0355          |
| Gorai.008G115900.1 | .                  | .                  | .                  |
| .                  | .                  | .                  | .                  |
| Vv02g0474          | Tc03_g026610       | Gorai.004G207200.1 | .                  |
| Gorai.007G009900.1 | Gorai.008G281500.1 | .                  | .                  |
| .                  | .                  | .                  | .                  |
| Vv02g0475          | .                  | .                  | .                  |
| .                  | .                  | .                  | .                  |
| Vv02g0476          | Tc03_g026600       | .                  | Gorai.003G163000.1 |
| Gorai.008G243200.1 | .                  | .                  | .                  |
| .                  | .                  | .                  | .                  |
| Vv02g0477          | Tc03_g026590       | Gorai.004G207000.1 | Gorai.             |
| 003G163200.1       | Gorai.008G243100.1 | .                  | .                  |
| .                  | .                  | .                  | .                  |
| Vv02g0478          | Tc03_g026580       | Gorai.004G206900.1 | .                  |
| Gorai.007G094200.1 | Gorai.008G243000.1 | Gorai.006G197000.1 | .                  |
| Vv15g0363          | .                  | .                  | .                  |
| .                  | .                  | .                  | .                  |
| Vv02g0479          | Tc03_g026560       | Gorai.004G206800.1 | .                  |
| .                  | .                  | .                  | .                  |
| Vv02g0480          | Tc03_g026530       | .                  | Gorai.003G163300.1 |
| .                  | .                  | .                  | .                  |
| Vv02g0481          | Tc03_g026510       | Gorai.004G206700.1 | .                  |
| Gorai.007G094100.1 | .                  | Vv15g0364          | .                  |
| Gorai.008G115700.1 | .                  | .                  | .                  |
| .                  | .                  | .                  | .                  |

|                    |                    |                    |             |
|--------------------|--------------------|--------------------|-------------|
| Vv02g0482          | Tc03_g026500       | Gorai.004G206600.1 | Gorai.      |
| 003G163800.1       | .                  | Gorai.008G242800.1 | .           |
| .                  | .                  | .                  | .           |
| .                  | .                  | .                  | .           |
| Vv02g0483          | Tc03_g026490       | Gorai.004G206500.1 | .           |
| Gorai.007G022100.1 | .                  | Gorai.006G210500.1 | .           |
| .                  | .                  | .                  | .           |
| .                  | .                  | .                  | .           |
| Vv02g0484          | Tc03_g026480       | Gorai.003G163900.1 | .           |
| Gorai.007G009800.1 | Gorai.008G242500.1 | .                  | Vv15g0375   |
| .                  | .                  | .                  | Vv016rg0176 |
| .                  | .                  | .                  | .           |
| Vv02g0485          | Tc03_g026470       | Gorai.004G206400.1 | .           |
| .                  | .                  | .                  | .           |
| .                  | .                  | .                  | .           |
| Vv02g0486          | .                  | Gorai.003G164000.1 | .           |
| .                  | .                  | .                  | .           |
| .                  | .                  | .                  | .           |
| Vv02g0487          | Tc03_g026460       | Gorai.004G206300.1 | .           |
| Gorai.007G007000.1 | Gorai.008G242400.1 | Gorai.006G210600.1 | .           |
| .                  | .                  | .                  | .           |
| .                  | .                  | .                  | .           |
| Vv02g0488          | Tc03_g026450       | Gorai.004G206200.1 | .           |
| Gorai.008G242300.1 | .                  | Gorai.006G210700.1 | .           |
| .                  | .                  | .                  | .           |
| .                  | .                  | .                  | .           |
| Vv02g0489          | Tc03_g026440       | Gorai.004G206100.1 | .           |
| Gorai.007G022000.1 | .                  | Gorai.006G210800.1 | .           |
| .                  | .                  | .                  | .           |
| .                  | .                  | .                  | .           |
| Vv02g0490          | Tc03_g026430       | Gorai.004G206000.1 | .           |
| Gorai.008G242200.1 | .                  | .                  | .           |
| .                  | .                  | .                  | .           |
| .                  | .                  | .                  | .           |
| Vv02g0491          | Tc03_g026420       | Gorai.004G205900.1 | .           |
| Gorai.008G242100.1 | .                  | .                  | .           |
| .                  | .                  | .                  | .           |
| .                  | .                  | .                  | .           |
| Vv02g0492          | Tc03_g026410       | Gorai.003G164300.1 | .           |
| .                  | Vv15g0383          | .                  | .           |
| .                  | .                  | .                  | .           |
| .                  | .                  | .                  | .           |
| Vv02g0493          | .                  | .                  | .           |
| .                  | .                  | .                  | .           |
| .                  | .                  | .                  | .           |
| Vv02g0494          | .                  | .                  | .           |
| .                  | .                  | .                  | .           |
| .                  | .                  | .                  | .           |
| Vv02g0495          | Tc03_g026400       | Gorai.003G164400.1 | .           |
| Gorai.008G242000.1 | .                  | .                  | .           |
| .                  | .                  | .                  | .           |

|                    |              |                    |        |   |
|--------------------|--------------|--------------------|--------|---|
| Vv02g0496          | Tc03_g026360 | Gorai.004G205800.1 | .      | . |
| .                  | .            | .                  | .      | . |
| Vv02g0497          | Tc03_g026350 | .                  | Gorai. | . |
| 008G241900.1       | .            | .                  | .      | . |
| Vv02g0498          | Tc03_g026340 | Gorai.004G205700.1 | .      | . |
| .                  | .            | .                  | .      | . |
| Vv02g0499          | Tc03_g026330 | Gorai.004G205600.1 | .      | . |
| .                  | .            | .                  | .      | . |
| Vv02g0500          | .            | .                  | .      | . |
| .                  | .            | .                  | .      | . |
| Vv02g0501          | Tc03_g026320 | .                  | .      | . |
| .                  | .            | .                  | .      | . |
| Vv02g0502          | .            | .                  | .      | . |
| .                  | .            | .                  | .      | . |
| Vv02g0503          | .            | .                  | .      | . |
| .                  | .            | .                  | .      | . |
| Vv02g0504          | Tc03_g026310 | Gorai.004G205500.1 | .      | . |
| .                  | .            | .                  | .      | . |
| Vv02g0505          | Tc03_g026300 | .                  | .      | . |
| Gorai.006G210900.1 | .            | .                  | .      | . |
| Vv02g0506          | Tc03_g026290 | Gorai.004G205400.1 | .      | . |
| .                  | .            | .                  | .      | . |
| Vv02g0507          | .            | .                  | .      | . |
| .                  | .            | .                  | .      | . |
| Vv02g0508          | Tc03_g026280 | Gorai.004G205000.1 | .      | . |
| .                  | .            | .                  | .      | . |
| Vv02g0509          | .            | .                  | .      | . |
| .                  | .            | .                  | .      | . |
| Vv02g0510          | Tc03_g026270 | Gorai.004G204800.1 | .      | . |
| .                  | .            | .                  | .      | . |
| Vv02g0511          | Tc03_g030330 | .                  | .      | . |
| .                  | .            | .                  | .      | . |
| .                  | .            | .                  | .      | . |

|                    |                    |                    |   |   |                    |   |
|--------------------|--------------------|--------------------|---|---|--------------------|---|
| Vv02g0512          | .                  | .                  | . | . | .                  | . |
| Vv15g0413          | .                  | .                  | . | . | .                  | . |
| .                  | .                  | .                  | . | . | .                  | . |
| Vv02g0513          | .                  | .                  | . | . | .                  | . |
| .                  | .                  | .                  | . | . | .                  | . |
| Vv02g0514          | Tc03_g026260       | Gorai.004G204600.1 | . | . | .                  | . |
| Gorai.007G092400.1 | Gorai.008G241800.1 | .                  | . | . | Vv15g0429          | . |
| .                  | .                  | .                  | . | . | .                  | . |
| .                  | .                  | .                  | . | . | .                  | . |
| Vv02g0515          | Tc03_g026250       | Gorai.004G204500.1 | . | . | Gorai.             | . |
| 003G164600.1       | Gorai.008G241700.1 | .                  | . | . | .                  | . |
| .                  | .                  | .                  | . | . | .                  | . |
| .                  | .                  | .                  | . | . | .                  | . |
| Vv02g0516          | Tc03_g026240       | Gorai.004G204400.1 | . | . | .                  | . |
| Gorai.008G241600.1 | .                  | .                  | . | . | .                  | . |
| .                  | .                  | .                  | . | . | .                  | . |
| .                  | .                  | .                  | . | . | .                  | . |
| Vv02g0517          | Tc03_g026230       | Gorai.004G204300.1 | . | . | .                  | . |
| .                  | .                  | .                  | . | . | .                  | . |
| .                  | .                  | .                  | . | . | .                  | . |
| Vv02g0518          | .                  | .                  | . | . | .                  | . |
| .                  | .                  | .                  | . | . | .                  | . |
| .                  | .                  | .                  | . | . | .                  | . |
| Vv02g0519          | Tc03_g026220       | Gorai.003G164700.1 | . | . | .                  | . |
| Gorai.008G241500.1 | Gorai.006G196100.1 | .                  | . | . | .                  | . |
| .                  | .                  | Vv016rg0140        | . | . | .                  | . |
| .                  | .                  | .                  | . | . | .                  | . |
| Vv02g0520          | .                  | .                  | . | . | .                  | . |
| .                  | .                  | .                  | . | . | .                  | . |
| .                  | .                  | .                  | . | . | .                  | . |
| Vv02g0521          | .                  | .                  | . | . | .                  | . |
| .                  | .                  | .                  | . | . | .                  | . |
| .                  | .                  | .                  | . | . | .                  | . |
| Vv02g0522          | Tc03_g026210       | Gorai.004G204200.1 | . | . | .                  | . |
| .                  | .                  | .                  | . | . | .                  | . |
| .                  | Vv016rg0138        | .                  | . | . | .                  | . |
| .                  | .                  | .                  | . | . | .                  | . |
| Vv02g0523          | .                  | .                  | . | . | Gorai.008G283200.1 | . |
| .                  | .                  | .                  | . | . | .                  | . |
| .                  | .                  | .                  | . | . | .                  | . |
| Vv02g0524          | Tc03_g026200       | Gorai.004G204100.1 | . | . | .                  | . |
| Gorai.008G241300.1 | .                  | .                  | . | . | .                  | . |
| .                  | .                  | .                  | . | . | .                  | . |
| .                  | .                  | .                  | . | . | .                  | . |
| Vv02g0525          | Tc03_g026190       | Gorai.004G204000.1 | . | . | Gorai.             | . |
| 003G164800.1       | .                  | .                  | . | . | .                  | . |
| .                  | .                  | .                  | . | . | .                  | . |
| .                  | .                  | .                  | . | . | .                  | . |
| Vv02g0526          | Tc03_g026170       | .                  | . | . | Gorai.             | . |



|                    |                    |                    |                    |                    |                    |   |   |
|--------------------|--------------------|--------------------|--------------------|--------------------|--------------------|---|---|
| 008G241200.1       | .                  | .                  | .                  | .                  | .                  | . | . |
| .                  | .                  | .                  | .                  | .                  | .                  | . | . |
| Vv02g0527          | .                  | .                  | .                  | .                  | .                  | . | . |
| .                  | .                  | .                  | .                  | .                  | .                  | . | . |
| Vv02g0528          | Tc03_g026150       | .                  | .                  | .                  | Gorai.007G092100.1 | . | . |
| Gorai.008G241000.1 | .                  | .                  | .                  | Vv15g0451          | .                  | . | . |
| Tc01_g036690       | .                  | .                  | Gorai.001G171000.1 | .                  | .                  | . | . |
| .                  | .                  | .                  | .                  | .                  | .                  | . | . |
| Vv02g0529          | Tc03_g026140       | .                  | .                  | .                  | Gorai.             | . | . |
| 008G240900.1       | Gorai.006G211300.1 | .                  | Vv016rg0136        | .                  | .                  | . | . |
| .                  | .                  | .                  | .                  | .                  | .                  | . | . |
| .                  | .                  | .                  | .                  | .                  | .                  | . | . |
| Vv02g0530          | Tc03_g026130       | .                  | .                  | .                  | Gorai.007G091900.1 | . | . |
| Gorai.008G240800.1 | .                  | Gorai.006G211400.1 | .                  | .                  | .                  | . | . |
| .                  | .                  | .                  | .                  | .                  | .                  | . | . |
| .                  | .                  | .                  | .                  | .                  | .                  | . | . |
| Vv02g0531          | Tc03_g026120       | Gorai.004G160700.1 | .                  | .                  | .                  | . | . |
| Gorai.007G091800.1 | Gorai.008G240700.1 | Gorai.006G211500.1 | .                  | .                  | .                  | . | . |
| Vv15g0335          | Tc01_g037430       | .                  | .                  | .                  | .                  | . | . |
| Gorai.004G158000.1 | .                  | .                  | .                  | .                  | .                  | . | . |
| .                  | .                  | .                  | .                  | .                  | .                  | . | . |
| Vv02g0532          | Tc03_g026100       | .                  | .                  | .                  | .                  | . | . |
| .                  | .                  | .                  | .                  | .                  | .                  | . | . |
| .                  | .                  | .                  | .                  | .                  | .                  | . | . |
| Vv02g0533          | Tc03_g026080       | Gorai.004G203900.1 | .                  | .                  | .                  | . | . |
| Gorai.007G021800.1 | .                  | Gorai.006G211600.1 | .                  | .                  | .                  | . | . |
| .                  | .                  | .                  | .                  | .                  | .                  | . | . |
| .                  | .                  | .                  | .                  | .                  | .                  | . | . |
| Vv02g0534          | Tc03_g026070       | Gorai.004G161300.1 | .                  | .                  | .                  | . | . |
| Gorai.007G021700.1 | Gorai.008G283600.1 | .                  | Vv15g0324          | .                  | .                  | . | . |
| Tc01_g037530       | .                  | .                  | .                  | .                  | .                  | . | . |
| Vv016rg0120        | .                  | .                  | .                  | .                  | .                  | . | . |
| Vv02g0535          | Tc03_g025930       | .                  | .                  | Gorai.007G021600.1 | .                  | . | . |
| .                  | .                  | .                  | .                  | .                  | .                  | . | . |
| .                  | .                  | .                  | .                  | .                  | .                  | . | . |
| Vv02g0536          | Tc03_g025920       | .                  | Gorai.003G166600.1 | .                  | .                  | . | . |
| .                  | .                  | .                  | .                  | .                  | .                  | . | . |
| .                  | .                  | .                  | .                  | .                  | .                  | . | . |
| Vv02g0537          | Tc03_g025910       | Gorai.004G162000.1 | .                  | .                  | .                  | . | . |
| Gorai.008G239700.1 | .                  | Vv15g0317          | .                  | .                  | .                  | . | . |
| Tc01_g037740       | Gorai.008G113900.1 | .                  | .                  | .                  | .                  | . | . |
| Gorai.004G162000.1 | Vv016rg0099        | .                  | .                  | .                  | .                  | . | . |
| .                  | .                  | .                  | .                  | .                  | .                  | . | . |
| Vv02g0538          | Tc03_g025900       | .                  | .                  | .                  | Gorai.             | . | . |
| 008G239600.1       | .                  | .                  | .                  | .                  | .                  | . | . |
| .                  | .                  | .                  | .                  | .                  | .                  | . | . |
| Vv02g0539          | Tc03_g025890       | .                  | .                  | .                  | Gorai.             | . | . |
| 008G239500.1       | .                  | .                  | .                  | .                  | .                  | . | . |
| .                  | .                  | .                  | .                  | .                  | .                  | . | . |

|                    |                    |                    |   |   |   |                    |   |
|--------------------|--------------------|--------------------|---|---|---|--------------------|---|
| Vv02g0540          | .                  | .                  | . | . | . | .                  | . |
| .                  | .                  | .                  | . | . | . | .                  | . |
| Vv02g0541          | Tc03_g025880       | .                  | . | . | . | Gorai.             | . |
| 008G239400.1       | Gorai.006G211900.1 | .                  | . | . | . | .                  | . |
| .                  | .                  | .                  | . | . | . | .                  | . |
| Vv02g0542          | Tc03_g025870       | Gorai.004G162400.1 | . | . | . | .                  | . |
| Gorai.007G090600.1 | Gorai.008G284100.1 | Gorai.006G195900.1 | . | . | . | .                  | . |
| Vv15g0314          | Tc01_g037770       | .                  | . | . | . | Gorai.             | . |
| 001G174200.1       | Gorai.004G040700.1 | Gorai.004G162400.1 | . | . | . | .                  | . |
| Vv016rg0094        | .                  | .                  | . | . | . | .                  | . |
| Vv02g0543          | Tc03_g025860       | .                  | . | . | . | Gorai.007G021400.1 | . |
| Gorai.008G239300.1 | .                  | .                  | . | . | . | .                  | . |
| .                  | .                  | .                  | . | . | . | .                  | . |
| Vv02g0544          | .                  | .                  | . | . | . | .                  | . |
| .                  | .                  | .                  | . | . | . | .                  | . |
| Vv02g0545          | Tc03_g025850       | .                  | . | . | . | .                  | . |
| .                  | .                  | .                  | . | . | . | .                  | . |
| Vv02g0546          | Tc03_g025840       | Gorai.004G162700.1 | . | . | . | .                  | . |
| Gorai.007G090500.1 | .                  | Vv016rg0079        | . | . | . | .                  | . |
| .                  | .                  | .                  | . | . | . | .                  | . |
| Vv02g0547          | .                  | .                  | . | . | . | .                  | . |
| .                  | .                  | .                  | . | . | . | .                  | . |
| Vv02g0548          | .                  | .                  | . | . | . | .                  | . |
| .                  | .                  | .                  | . | . | . | .                  | . |
| Vv02g0549          | Tc03_g025830       | Gorai.004G202100.1 | . | . | . | Gorai.             | . |
| 003G116000.1       | .                  | Gorai.006G195100.1 | . | . | . | .                  | . |
| .                  | .                  | .                  | . | . | . | .                  | . |
| Vv02g0550          | Tc03_g025810       | Gorai.003G165000.1 | . | . | . | .                  | . |
| .                  | .                  | .                  | . | . | . | .                  | . |
| Vv02g0551          | Tc03_g025790       | Gorai.003G165100.1 | . | . | . | .                  | . |
| .                  | .                  | .                  | . | . | . | .                  | . |
| Vv02g0552          | .                  | .                  | . | . | . | .                  | . |
| .                  | .                  | .                  | . | . | . | .                  | . |
| Vv02g0553          | Tc03_g025780       | Gorai.003G165300.1 | . | . | . | .                  | . |
| .                  | .                  | .                  | . | . | . | .                  | . |
| Vv02g0554          | .                  | .                  | . | . | . | .                  | . |
| .                  | .                  | .                  | . | . | . | .                  | . |

|                    |                    |                    |                    |   |
|--------------------|--------------------|--------------------|--------------------|---|
| Vv02g0555          | Tc03_g025770       | .                  | Gorai.003G165400.1 | . |
| .                  | .                  | .                  | .                  | . |
| Vv02g0556          | Tc03_g025760       | .                  | Gorai.003G165500.1 | . |
| .                  | .                  | .                  | .                  | . |
| Vv02g0557          | Tc03_g025740       | Gorai.004G202000.1 | Gorai.             | . |
| 003G165600.1       | Gorai.008G239200.1 | .                  | .                  | . |
| .                  | .                  | .                  | .                  | . |
| Vv02g0558          | .                  | .                  | .                  | . |
| .                  | .                  | .                  | .                  | . |
| Vv02g0559          | Tc03_g025720       | .                  | Gorai.003G168000.1 | . |
| Gorai.008G238900.1 | .                  | .                  | .                  | . |
| .                  | .                  | .                  | .                  | . |
| Vv02g0560          | Tc03_g025710       | Gorai.004G201900.1 | .                  | . |
| Gorai.008G238800.1 | .                  | .                  | .                  | . |
| .                  | .                  | .                  | .                  | . |
| Vv02g0561          | Tc03_g025700       | Gorai.004G201800.1 | .                  | . |
| Gorai.007G021300.1 | .                  | .                  | .                  | . |
| .                  | .                  | .                  | .                  | . |
| Vv02g0562          | Tc03_g025690       | Gorai.004G201700.1 | .                  | . |
| Gorai.007G021100.1 | Gorai.008G238700.1 | .                  | .                  | . |
| .                  | .                  | .                  | .                  | . |
| Vv02g0563          | Tc03_g025680       | .                  | Gorai.007G021000.1 | . |
| .                  | .                  | .                  | .                  | . |
| Vv02g0564          | Tc03_g025620       | Gorai.004G201500.1 | Gorai.             | . |
| 003G114800.1       | Gorai.007G090200.1 | Gorai.008G238600.1 | .                  | . |
| Gorai.006G212000.1 | Vv15g0299          | Tc01_g037920       | .                  | . |
| Gorai.008G113200.1 | .                  | .                  | .                  | . |
| .                  | .                  | .                  | .                  | . |
| Vv02g0565          | .                  | .                  | .                  | . |
| .                  | .                  | .                  | .                  | . |
| Vv02g0566          | Tc03_g025600       | Gorai.004G201400.1 | Gorai.             | . |
| 003G114700.1       | Gorai.008G238500.1 | Gorai.006G212100.1 | .                  | . |
| Vv15g0297          | Tc01_g037930       | .                  | .                  | . |
| .                  | .                  | .                  | .                  | . |
| Vv02g0567          | Tc03_g025580       | .                  | Gorai.007G020900.1 | . |
| .                  | .                  | .                  | .                  | . |
| .                  | .                  | .                  | .                  | . |
| Vv02g0568          | Tc03_g025570       | .                  | Gorai.007G020800.1 | . |
| .                  | Gorai.006G212300.1 | .                  | .                  | . |

|                    |                    |                    |                    |                    |   |   |   |
|--------------------|--------------------|--------------------|--------------------|--------------------|---|---|---|
| .                  | .                  | .                  | .                  | .                  | . | . | . |
| Vv02g0569          | Tc03_g025550       | Gorai.004G201300.1 | .                  | .                  | . | . | . |
| Gorai.007G018000.1 | .                  | .                  | .                  | .                  | . | . | . |
| .                  | .                  | .                  | .                  | .                  | . | . | . |
| Vv02g0570          | Tc03_g025540       | Gorai.004G163300.1 | Gorai.             | .                  | . | . | . |
| 003G168900.1       | Gorai.007G089900.1 | .                  | Gorai.006G212400.1 | .                  | . | . | . |
| .                  | .                  | .                  | .                  | .                  | . | . | . |
| Vv02g0571          | .                  | .                  | .                  | .                  | . | . | . |
| .                  | .                  | .                  | .                  | .                  | . | . | . |
| Vv02g0572          | Tc03_g025530       | .                  | Gorai.003G169000.1 | .                  | . | . | . |
| .                  | .                  | .                  | .                  | .                  | . | . | . |
| Vv02g0573          | Tc03_g025520       | .                  | .                  | .                  | . | . | . |
| .                  | .                  | .                  | .                  | .                  | . | . | . |
| Vv02g0574          | .                  | Gorai.004G200900.1 | .                  | .                  | . | . | . |
| .                  | .                  | .                  | .                  | .                  | . | . | . |
| Vv02g0575          | Tc03_g025510       | .                  | .                  | Gorai.007G089700.1 | . | . | . |
| .                  | .                  | .                  | .                  | .                  | . | . | . |
| Vv02g0576          | Tc03_g025500       | .                  | .                  | .                  | . | . | . |
| Gorai.006G212500.1 | .                  | .                  | .                  | .                  | . | . | . |
| .                  | .                  | .                  | .                  | .                  | . | . | . |
| Vv02g0577          | .                  | .                  | .                  | Gorai.             | . | . | . |
| 006G212700.1       | .                  | .                  | .                  | .                  | . | . | . |
| .                  | .                  | .                  | .                  | .                  | . | . | . |
| Vv02g0578          | Tc03_g025480       | .                  | .                  | .                  | . | . | . |
| .                  | .                  | .                  | .                  | .                  | . | . | . |
| Vv02g0579          | .                  | Gorai.003G169200.1 | .                  | .                  | . | . | . |
| .                  | .                  | .                  | .                  | .                  | . | . | . |
| Vv02g0580          | Tc03_g025470       | .                  | Gorai.003G111200.1 | .                  | . | . | . |
| .                  | .                  | .                  | .                  | .                  | . | . | . |
| Vv02g0581          | Tc03_g025460       | .                  | Gorai.003G169400.1 | .                  | . | . | . |
| .                  | .                  | .                  | .                  | .                  | . | . | . |
| Vv02g0582          | Tc03_g025450       | .                  | Gorai.003G169500.1 | .                  | . | . | . |
| .                  | .                  | .                  | .                  | .                  | . | . | . |
| Vv02g0583          | Tc03_g025440       | .                  | Gorai.003G169600.1 | .                  | . | . | . |
| .                  | Gorai.006G212800.1 | .                  | .                  | .                  | . | . | . |
| .                  | .                  | .                  | .                  | .                  | . | . | . |
| .                  | .                  | .                  | .                  | .                  | . | . | . |

|                    |                    |                    |                    |   |   |   |   |
|--------------------|--------------------|--------------------|--------------------|---|---|---|---|
| Vv02g0584          | .                  | .                  | .                  | . | . | . | . |
| .                  | .                  | .                  | .                  | . | . | . | . |
| Vv02g0585          | .                  | .                  | .                  | . | . | . | . |
| .                  | .                  | .                  | .                  | . | . | . | . |
| Vv02g0586          | Tc03_g025430       | Gorai.004G163500.1 | Gorai.             | . | . | . | . |
| 003G169800.1       | Gorai.007G089600.1 | .                  | .                  | . | . | . | . |
| .                  | .                  | .                  | .                  | . | . | . | . |
| Vv02g0587          | Tc03_g025420       | .                  | .                  | . | . | . | . |
| .                  | .                  | .                  | .                  | . | . | . | . |
| Vv02g0588          | .                  | .                  | .                  | . | . | . | . |
| .                  | .                  | .                  | .                  | . | . | . | . |
| Vv02g0589          | Tc03_g025410       | .                  | Gorai.003G170000.1 | . | . | . | . |
| Gorai.007G089500.1 | .                  | .                  | .                  | . | . | . | . |
| .                  | .                  | .                  | .                  | . | . | . | . |
| Vv02g0590          | .                  | .                  | Gorai.007G089300.1 | . | . | . | . |
| .                  | .                  | .                  | .                  | . | . | . | . |
| Vv02g0591          | Tc03_g025400       | .                  | .                  | . | . | . | . |
| .                  | .                  | .                  | .                  | . | . | . | . |
| Vv02g0592          | .                  | .                  | .                  | . | . | . | . |
| .                  | .                  | .                  | .                  | . | . | . | . |
| Vv02g0593          | Tc03_g025390       | .                  | .                  | . | . | . | . |
| .                  | .                  | .                  | .                  | . | . | . | . |
| Vv02g0594          | Tc03_g025380       | .                  | .                  | . | . | . | . |
| .                  | .                  | .                  | .                  | . | . | . | . |
| Vv02g0595          | Tc03_g025370       | .                  | Gorai.003G170100.1 | . | . | . | . |
| .                  | .                  | .                  | .                  | . | . | . | . |
| .                  | Vv18g0366          | Tc08_g010160       | .                  | . | . | . | . |
| Gorai.009G243200.1 | .                  | Gorai.010G048000.1 | .                  | . | . | . | . |
| Vv02g0596          | Tc03_g025350       | .                  | .                  | . | . | . | . |
| .                  | .                  | .                  | .                  | . | . | . | . |
| Vv02g0597          | .                  | .                  | .                  | . | . | . | . |
| .                  | .                  | .                  | .                  | . | . | . | . |
| Vv02g0598          | Tc03_g025340       | .                  | .                  | . | . | . | . |
| Gorai.006G212900.1 | .                  | .                  | .                  | . | . | . | . |
| .                  | .                  | .                  | .                  | . | . | . | . |
| Vv02g0599          | Tc03_g025330       | .                  | Gorai.003G170200.1 | . | . | . | . |
| .                  | .                  | .                  | .                  | . | . | . | . |

|                    |                    |                    |   |                    |
|--------------------|--------------------|--------------------|---|--------------------|
| .                  | Vv18g0372          | Tc08_g010030       | . | Gorai.             |
| 005G091400.1       | Gorai.009G242900.1 | Gorai.009G283100.1 | . | .                  |
| Gorai.010G047800.1 | .                  | .                  | . | .                  |
| Vv02g0600          | .                  | .                  | . | .                  |
| .                  | .                  | .                  | . | .                  |
| Vv02g0601          | Tc03_g025320       | Gorai.003G170400.1 | . | .                  |
| .                  | Vv15g0287          | .                  | . | .                  |
| .                  | .                  | .                  | . | .                  |
| Vv02g0602          | .                  | .                  | . | .                  |
| .                  | .                  | .                  | . | .                  |
| Vv02g0603          | Tc03_g025310       | Gorai.004G200000.1 | . | .                  |
| Gorai.007G027400.1 | .                  | .                  | . | .                  |
| .                  | .                  | .                  | . | .                  |
| Vv02g0604          | Tc03_g025300       | Gorai.004G199900.1 | . | .                  |
| Gorai.007G027500.1 | .                  | .                  | . | .                  |
| .                  | .                  | .                  | . | .                  |
| Vv02g0605          | .                  | .                  | . | .                  |
| .                  | .                  | .                  | . | .                  |
| Vv02g0606          | .                  | .                  | . | .                  |
| .                  | .                  | .                  | . | .                  |
| Vv02g0607          | Tc03_g025290       | .                  | . | Gorai.             |
| 008G237700.1       | Gorai.006G213000.1 | .                  | . | .                  |
| .                  | .                  | .                  | . | .                  |
| Vv02g0608          | Tc03_g025280       | .                  | . | Gorai.007G027700.1 |
| Gorai.008G237600.1 | .                  | .                  | . | .                  |
| .                  | .                  | .                  | . | .                  |
| Vv02g0609          | Tc03_g025270       | .                  | . | .                  |
| .                  | .                  | .                  | . | .                  |
| Vv02g0610          | .                  | .                  | . | .                  |
| .                  | .                  | .                  | . | .                  |
| Vv02g0611          | Tc03_g025210       | Gorai.003G170500.1 | . | .                  |
| .                  | .                  | .                  | . | .                  |
| Vv02g0612          | Tc03_g025200       | .                  | . | .                  |
| .                  | .                  | .                  | . | .                  |
| Vv02g0613          | .                  | .                  | . | .                  |
| .                  | .                  | .                  | . | .                  |
| .                  | .                  | .                  | . | .                  |

|                    |                    |                    |                    |
|--------------------|--------------------|--------------------|--------------------|
| Vv02g0614          | Tc03_g025180       | Gorai.004G163700.1 | Gorai.             |
| 003G170600.1       | .                  | Gorai.006G213100.1 | .                  |
| .                  | .                  | .                  | .                  |
| .                  | .                  | .                  | .                  |
| Vv02g0615          | .                  | .                  | .                  |
| .                  | .                  | .                  | .                  |
| .                  | .                  | .                  | .                  |
| Vv02g0616          | Tc03_g025170       | .                  | Gorai.003G170700.1 |
| .                  | Vv15g0269          | .                  | Tc01_g038130       |
| Gorai.008G106100.1 | .                  | .                  | .                  |
| .                  | .                  | .                  | .                  |
| Vv02g0617          | Tc03_g025150       | .                  | .                  |
| .                  | .                  | .                  | .                  |
| .                  | .                  | .                  | .                  |
| Vv02g0618          | .                  | .                  | Gorai.008G236000.1 |
| .                  | .                  | .                  | .                  |
| .                  | .                  | .                  | .                  |
| Vv02g0619          | .                  | .                  | Gorai.             |
| 006G213300.1       | .                  | .                  | .                  |
| .                  | .                  | .                  | .                  |
| Vv02g0620          | .                  | .                  | .                  |
| .                  | .                  | .                  | .                  |
| .                  | .                  | .                  | .                  |
| Vv02g0621          | Tc03_g025120       | .                  | Gorai.             |
| 008G216100.1       | .                  | .                  | .                  |
| .                  | .                  | .                  | .                  |
| Vv02g0622          | Tc03_g025110       | Gorai.004G199300.1 | .                  |
| .                  | .                  | .                  | .                  |
| .                  | .                  | .                  | .                  |
| Vv02g0623          | Tc03_g025100       | Gorai.004G163800.1 | Gorai.             |
| 003G170900.1       | Gorai.007G028100.1 | Gorai.008G235700.1 | .                  |
| Gorai.006G213500.1 | Vv15g0266          | Tc01_g038160       | .                  |
| Gorai.008G113000.1 | .                  | Gorai.004G040100.1 | Gorai.             |
| 004G163800.1       | .                  | .                  | .                  |
| Vv02g0624          | Tc03_g025090       | .                  | Gorai.             |
| 008G235600.1       | .                  | .                  | .                  |
| .                  | .                  | .                  | .                  |
| Vv02g0625          | Tc03_g025080       | Gorai.004G199100.1 | Gorai.             |
| 003G171000.1       | Gorai.008G217800.1 | .                  | .                  |
| .                  | .                  | .                  | .                  |
| .                  | .                  | .                  | .                  |
| Vv02g0626          | Tc03_g025070       | Gorai.004G199000.1 | .                  |
| .                  | .                  | .                  | .                  |
| .                  | .                  | .                  | .                  |
| Vv02g0627          | Tc03_g025060       | .                  | Gorai.003G171100.1 |
| .                  | .                  | .                  | .                  |
| .                  | .                  | .                  | .                  |
| Vv02g0628          | Tc03_g025050       | .                  | Gorai.003G171200.1 |
| .                  | Vv18g0401          | .                  | Tc08_g009750       |
| .                  | .                  | .                  | .                  |
| .                  | .                  | .                  | .                  |

|                    |                    |                    |        |                    |   |   |   |
|--------------------|--------------------|--------------------|--------|--------------------|---|---|---|
| Vv02g0629          | .                  | .                  | .      | .                  | . | . | . |
| .                  | .                  | .                  | .      | .                  | . | . | . |
| Vv02g0630          | Tc03_g025030       | Gorai.004G198800.1 | .      | .                  | . | . | . |
| Gorai.008G235400.1 | .                  | .                  | .      | .                  | . | . | . |
| .                  | .                  | .                  | .      | .                  | . | . | . |
| Vv02g0631          | Tc03_g025020       | Gorai.003G171400.1 | .      | .                  | . | . | . |
| Gorai.008G235300.1 | .                  | .                  | .      | .                  | . | . | . |
| .                  | .                  | .                  | .      | .                  | . | . | . |
| Vv02g0632          | Tc03_g025010       | Gorai.004G198700.1 | Gorai. | .                  | . | . | . |
| 003G171500.1       | Gorai.008G235200.1 | .                  | .      | .                  | . | . | . |
| .                  | .                  | .                  | .      | .                  | . | . | . |
| Vv02g0633          | Tc03_g025000       | .                  | .      | .                  | . | . | . |
| .                  | .                  | .                  | .      | .                  | . | . | . |
| Vv02g0634          | Tc03_g024980       | .                  | .      | .                  | . | . | . |
| Gorai.006G213600.1 | .                  | .                  | .      | .                  | . | . | . |
| .                  | .                  | .                  | .      | .                  | . | . | . |
| Vv02g0635          | Tc03_g024940       | Gorai.004G198200.1 | .      | .                  | . | . | . |
| Gorai.008G235000.1 | Gorai.006G213800.1 | .                  | .      | .                  | . | . | . |
| .                  | .                  | .                  | .      | .                  | . | . | . |
| Vv02g0636          | Tc03_g024930       | .                  | .      | Gorai.007G028200.1 | . | . | . |
| .                  | .                  | .                  | .      | .                  | . | . | . |
| Vv02g0637          | .                  | .                  | .      | .                  | . | . | . |
| .                  | .                  | .                  | .      | .                  | . | . | . |
| Vv02g0638          | Tc03_g024900       | .                  | .      | Gorai.007G028300.1 | . | . | . |
| Gorai.008G234800.1 | .                  | .                  | .      | .                  | . | . | . |
| .                  | .                  | .                  | .      | .                  | . | . | . |
| Vv02g0639          | Gorai.004G197800.1 | .                  | Gorai. | .                  | . | . | . |
| 007G028500.1       | Gorai.008G232800.1 | .                  | .      | .                  | . | . | . |
| .                  | .                  | .                  | .      | .                  | . | . | . |
| Vv02g0640          | Gorai.004G191200.1 | .                  | .      | .                  | . | . | . |
| .                  | .                  | .                  | .      | .                  | . | . | . |
| Vv02g0641          | Gorai.004G191100.1 | .                  | .      | .                  | . | . | . |
| .                  | .                  | .                  | .      | .                  | . | . | . |
| Vv02g0642          | .                  | .                  | .      | .                  | . | . | . |
| Vv15g0079          | Tc01_g039820       | Gorai.008G110700.1 | .      | .                  | . | . | . |
| Gorai.004G038500.1 | Gorai.004G167300.1 | .                  | .      | .                  | . | . | . |
| .                  | .                  | .                  | .      | .                  | . | . | . |



|                    |   |                    |   |                    |   |   |   |
|--------------------|---|--------------------|---|--------------------|---|---|---|
| Vv02g0643          | . | .                  | . | .                  | . | . | . |
| .                  | . | .                  | . | .                  | . | . | . |
| Vv02g0644          | . | Gorai.004G191000.1 | . | Gorai.             | . | . | . |
| 007G030400.1       | . | .                  | . | .                  | . | . | . |
| .                  | . | .                  | . | .                  | . | . | . |
| Vv02g0645          | . | .                  | . | .                  | . | . | . |
| .                  | . | .                  | . | .                  | . | . | . |
| Vv02g0646          | . | Gorai.004G190900.1 | . | .                  | . | . | . |
| Gorai.006G214800.1 | . | Vv15g0078          | . | Tc01_g039830       | . | . | . |
| Gorai.008G110800.1 | . | .                  | . | Gorai.004G167400.1 | . | . | . |
| .                  | . | .                  | . | .                  | . | . | . |
| Vv02g0647          | . | Gorai.004G190800.1 | . | .                  | . | . | . |
| Gorai.006G214900.1 | . | Vv15g0077          | . | Tc01_g039840       | . | . | . |
| .                  | . | Gorai.004G167500.1 | . | .                  | . | . | . |
| .                  | . | .                  | . | .                  | . | . | . |
| Vv02g0648          | . | .                  | . | .                  | . | . | . |
| .                  | . | .                  | . | .                  | . | . | . |
| Vv02g0649          | . | .                  | . | .                  | . | . | . |
| .                  | . | .                  | . | .                  | . | . | . |
| Vv02g0650          | . | Gorai.004G190700.1 | . | .                  | . | . | . |
| .                  | . | .                  | . | .                  | . | . | . |
| Vv02g0651          | . | .                  | . | .                  | . | . | . |
| .                  | . | .                  | . | .                  | . | . | . |
| Vv02g0652          | . | .                  | . | .                  | . | . | . |
| .                  | . | .                  | . | .                  | . | . | . |
| Vv02g0653          | . | .                  | . | .                  | . | . | . |
| .                  | . | .                  | . | .                  | . | . | . |
| Vv02g0654          | . | .                  | . | Gorai.007G030600.1 | . | . | . |
| Gorai.008G218300.1 | . | Gorai.006G215100.1 | . | .                  | . | . | . |
| .                  | . | .                  | . | .                  | . | . | . |
| Vv02g0655          | . | .                  | . | .                  | . | . | . |
| .                  | . | .                  | . | .                  | . | . | . |
| Vv02g0656          | . | .                  | . | .                  | . | . | . |
| .                  | . | .                  | . | .                  | . | . | . |
| Vv02g0657          | . | Gorai.004G190500.1 | . | .                  | . | . | . |
| .                  | . | .                  | . | .                  | . | . | . |
| .                  | . | .                  | . | .                  | . | . | . |
| Vv02g0658          | . | .                  | . | .                  | . | . | . |

|                    |              |                    |   |                    |           |   |   |
|--------------------|--------------|--------------------|---|--------------------|-----------|---|---|
| .                  | .            | .                  | . | .                  | .         | . | . |
| .                  | .            | .                  | . | .                  | .         | . | . |
| Vv02g0659          | .            | .                  | . | .                  | .         | . | . |
| .                  | .            | .                  | . | .                  | .         | . | . |
| .                  | .            | .                  | . | .                  | .         | . | . |
| Vv02g0660          | .            | Gorai.004G190400.1 | . | Gorai.003G179300.1 | .         | . | . |
| .                  | .            | Gorai.006G215200.1 | . | Vv15g0066          | .         | . | . |
| Tc01_g039890       | .            | .                  | . | .                  | Vv18g0430 | . | . |
| Tc08_g009430       | .            | .                  | . | Gorai.009G239700.1 | .         | . | . |
| Gorai.010G044000.1 | .            | .                  | . | .                  | .         | . | . |
| Vv02g0661          | .            | Gorai.004G190300.1 | . | Gorai.003G179400.1 | .         | . | . |
| Gorai.007G030800.1 | .            | .                  | . | .                  | .         | . | . |
| .                  | .            | .                  | . | .                  | .         | . | . |
| .                  | .            | .                  | . | .                  | .         | . | . |
| Vv02g0662          | .            | .                  | . | .                  | .         | . | . |
| .                  | .            | .                  | . | .                  | .         | . | . |
| .                  | .            | .                  | . | .                  | .         | . | . |
| Vv02g0663          | .            | .                  | . | .                  | .         | . | . |
| .                  | .            | .                  | . | .                  | .         | . | . |
| .                  | .            | .                  | . | .                  | .         | . | . |
| Vv02g0664          | .            | Gorai.004G190200.1 | . | Gorai.             | .         | . | . |
| 007G030900.1       | .            | .                  | . | .                  | .         | . | . |
| .                  | .            | .                  | . | .                  | .         | . | . |
| .                  | .            | .                  | . | .                  | .         | . | . |
| Vv02g0665          | .            | .                  | . | .                  | .         | . | . |
| .                  | .            | .                  | . | .                  | .         | . | . |
| .                  | .            | .                  | . | .                  | .         | . | . |
| Vv02g0666          | .            | .                  | . | .                  | .         | . | . |
| .                  | .            | .                  | . | .                  | .         | . | . |
| .                  | .            | .                  | . | .                  | .         | . | . |
| Vv02g0667          | .            | .                  | . | .                  | .         | . | . |
| .                  | .            | .                  | . | .                  | .         | . | . |
| .                  | .            | .                  | . | .                  | .         | . | . |
| Vv02g0668          | .            | .                  | . | .                  | .         | . | . |
| .                  | .            | .                  | . | .                  | .         | . | . |
| .                  | .            | .                  | . | .                  | .         | . | . |
| Vv02g0669          | .            | .                  | . | .                  | .         | . | . |
| .                  | .            | .                  | . | .                  | .         | . | . |
| .                  | .            | .                  | . | .                  | .         | . | . |
| Vv02g0670          | .            | .                  | . | .                  | .         | . | . |
| .                  | .            | .                  | . | .                  | .         | . | . |
| .                  | .            | .                  | . | .                  | .         | . | . |
| Vv02g0671          | .            | .                  | . | .                  | .         | . | . |
| .                  | .            | .                  | . | .                  | .         | . | . |
| .                  | .            | .                  | . | .                  | .         | . | . |
| Vv02g0672          | Tc03_g026420 | .                  | . | .                  | .         | . | . |
| .                  | .            | .                  | . | .                  | .         | . | . |
| .                  | .            | .                  | . | .                  | .         | . | . |
| Vv02g0673          | .            | .                  | . | .                  | .         | . | . |
| .                  | .            | .                  | . | .                  | .         | . | . |

|                    |              |                    |                    |   |   |   |   |
|--------------------|--------------|--------------------|--------------------|---|---|---|---|
| Vv02g0674          | .            | .                  | .                  | . | . | . | . |
| .                  | .            | .                  | .                  | . | . | . | . |
| Vv02g0675          | .            | .                  | .                  | . | . | . | . |
| .                  | .            | .                  | .                  | . | . | . | . |
| Vv02g0676          | .            | .                  | .                  | . | . | . | . |
| .                  | .            | .                  | .                  | . | . | . | . |
| Vv02g0677          | .            | .                  | .                  | . | . | . | . |
| .                  | .            | .                  | .                  | . | . | . | . |
| Vv02g0678          | .            | .                  | .                  | . | . | . | . |
| .                  | .            | .                  | .                  | . | . | . | . |
| Vv02g0679          | .            | Gorai.004G190100.1 | .                  | . | . | . | . |
| .                  | .            | .                  | .                  | . | . | . | . |
| Vv02g0680          | .            | .                  | .                  | . | . | . | . |
| .                  | .            | .                  | .                  | . | . | . | . |
| Vv02g0681          | .            | Gorai.004G189700.1 | Gorai.003G179500.1 | . | . | . | . |
| .                  | .            | Gorai.006G215300.1 | .                  | . | . | . | . |
| .                  | .            | .                  | Vv18g0438          | . | . | . | . |
| Tc08_g009380       | .            | Gorai.009G239200.1 | Gorai.             | . | . | . | . |
| 009G282100.1       | .            | .                  | .                  | . | . | . | . |
| Vv02g0682          | .            | .                  | .                  | . | . | . | . |
| .                  | .            | .                  | .                  | . | . | . | . |
| Vv02g0683          | .            | Gorai.003G179700.1 | .                  | . | . | . | . |
| Gorai.006G215400.1 | .            | Vv15g0037          | .                  | . | . | . | . |
| .                  | .            | Gorai.004G168200.1 | .                  | . | . | . | . |
| .                  | .            | .                  | .                  | . | . | . | . |
| Vv02g0684          | .            | .                  | .                  | . | . | . | . |
| .                  | .            | .                  | .                  | . | . | . | . |
| Vv02g0685          | .            | .                  | .                  | . | . | . | . |
| .                  | .            | .                  | .                  | . | . | . | . |
| Vv02g0686          | .            | .                  | .                  | . | . | . | . |
| .                  | .            | .                  | .                  | . | . | . | . |
| Vv02g0687          | .            | .                  | .                  | . | . | . | . |
| .                  | .            | .                  | .                  | . | . | . | . |
| Vv02g0688          | Tc03_g021880 | .                  | .                  | . | . | . | . |
| .                  | .            | .                  | .                  | . | . | . | . |
| Vv02g0689          | .            | .                  | .                  | . | . | . | . |

|              |                    |                    |                    |   |   |                    |   |
|--------------|--------------------|--------------------|--------------------|---|---|--------------------|---|
| .            | .                  | .                  | .                  | . | . | .                  | . |
| .            | .                  | .                  | .                  | . | . | .                  | . |
| Vv02g0690    | .                  | .                  | .                  | . | . | Gorai.             | . |
| 006G215600.1 | .                  | .                  | .                  | . | . | .                  | . |
| .            | .                  | .                  | .                  | . | . | .                  | . |
| Vv02g0691    | .                  | .                  | .                  | . | . | .                  | . |
| .            | .                  | .                  | .                  | . | . | .                  | . |
| .            | .                  | .                  | .                  | . | . | .                  | . |
| Vv02g0692    | .                  | .                  | .                  | . | . | .                  | . |
| .            | .                  | .                  | .                  | . | . | .                  | . |
| .            | .                  | .                  | .                  | . | . | .                  | . |
| Vv02g0693    | Tc03_g022270       | .                  | .                  | . | . | Gorai.             | . |
| 008G220500.1 | .                  | .                  | .                  | . | . | .                  | . |
| .            | Vv18g0452          | Tc08_g009210       | .                  | . | . | .                  | . |
| .            | Gorai.009G281700.1 | .                  | .                  | . | . | .                  | . |
| Vv02g0694    | .                  | .                  | .                  | . | . | .                  | . |
| .            | .                  | .                  | .                  | . | . | .                  | . |
| .            | .                  | .                  | .                  | . | . | .                  | . |
| Vv02g0695    | .                  | .                  | .                  | . | . | .                  | . |
| .            | .                  | .                  | .                  | . | . | .                  | . |
| .            | .                  | .                  | .                  | . | . | .                  | . |
| Vv02g0696    | .                  | .                  | .                  | . | . | .                  | . |
| .            | .                  | .                  | .                  | . | . | .                  | . |
| .            | .                  | .                  | .                  | . | . | .                  | . |
| Vv02g0697    | .                  | .                  | .                  | . | . | .                  | . |
| .            | .                  | .                  | .                  | . | . | .                  | . |
| .            | .                  | .                  | .                  | . | . | .                  | . |
| Vv02g0698    | .                  | .                  | Gorai.003G179800.1 | . | . | .                  | . |
| .            | .                  | .                  | .                  | . | . | .                  | . |
| .            | .                  | .                  | .                  | . | . | .                  | . |
| Vv02g0699    | .                  | .                  | .                  | . | . | .                  | . |
| .            | .                  | .                  | .                  | . | . | .                  | . |
| .            | .                  | .                  | .                  | . | . | .                  | . |
| Vv02g0700    | .                  | .                  | .                  | . | . | .                  | . |
| .            | .                  | .                  | .                  | . | . | .                  | . |
| .            | .                  | .                  | .                  | . | . | .                  | . |
| Vv02g0701    | .                  | .                  | .                  | . | . | .                  | . |
| .            | .                  | .                  | .                  | . | . | .                  | . |
| .            | .                  | .                  | .                  | . | . | .                  | . |
| Vv02g0702    | .                  | .                  | .                  | . | . | .                  | . |
| .            | .                  | .                  | .                  | . | . | .                  | . |
| .            | .                  | .                  | .                  | . | . | .                  | . |
| Vv02g0703    | .                  | .                  | .                  | . | . | Gorai.008G229500.1 | . |
| .            | Vv15g0027          | .                  | .                  | . | . | .                  | . |
| .            | .                  | .                  | .                  | . | . | .                  | . |
| Vv02g0704    | .                  | Gorai.004G189000.1 | .                  | . | . | .                  | . |
| .            | Vv15g0026          | Tc01_g008680       | .                  | . | . | .                  | . |
| .            | .                  | .                  | .                  | . | . | .                  | . |
| .            | .                  | .                  | .                  | . | . | .                  | . |
| Vv02g0705    | .                  | .                  | .                  | . | . | Gorai.008G229400.1 | . |

|                    |                    |                    |                    |   |   |   |   |
|--------------------|--------------------|--------------------|--------------------|---|---|---|---|
| .                  | .                  | .                  | .                  | . | . | . | . |
| .                  | .                  | .                  | .                  | . | . | . | . |
| Vv02g0706          | .                  | .                  | .                  | . | . | . | . |
| .                  | .                  | .                  | .                  | . | . | . | . |
| .                  | .                  | .                  | .                  | . | . | . | . |
| Vv02g0707          | .                  | Gorai.004G188800.1 | .                  | . | . | . | . |
| Gorai.008G229300.1 | .                  | .                  | .                  | . | . | . | . |
| .                  | .                  | .                  | .                  | . | . | . | . |
| .                  | .                  | .                  | .                  | . | . | . | . |
| Vv02g0708          | .                  | .                  | .                  | . | . | . | . |
| .                  | .                  | .                  | .                  | . | . | . | . |
| .                  | .                  | .                  | .                  | . | . | . | . |
| Vv02g0709          | .                  | .                  | .                  | . | . | . | . |
| .                  | .                  | .                  | .                  | . | . | . | . |
| .                  | .                  | .                  | .                  | . | . | . | . |
| Vv02g0710          | .                  | .                  | .                  | . | . | . | . |
| .                  | .                  | .                  | .                  | . | . | . | . |
| .                  | .                  | .                  | .                  | . | . | . | . |
| Vv02g0711          | Tc03_g026120       | Gorai.004G160700.1 | .                  | . | . | . | . |
| .                  | Gorai.006G216300.1 | .                  | .                  | . | . | . | . |
| .                  | .                  | .                  | .                  | . | . | . | . |
| .                  | .                  | .                  | .                  | . | . | . | . |
| Vv02g0712          | .                  | .                  | .                  | . | . | . | . |
| .                  | .                  | .                  | .                  | . | . | . | . |
| .                  | .                  | .                  | .                  | . | . | . | . |
| Vv02g0713          | .                  | Gorai.004G161300.1 | .                  | . | . | . | . |
| .                  | .                  | .                  | .                  | . | . | . | . |
| .                  | .                  | .                  | .                  | . | . | . | . |
| Vv02g0714          | .                  | .                  | Gorai.007G031400.1 | . | . | . | . |
| .                  | .                  | .                  | .                  | . | . | . | . |
| .                  | .                  | .                  | .                  | . | . | . | . |
| Vv02g0715          | .                  | .                  | .                  | . | . | . | . |
| .                  | .                  | .                  | .                  | . | . | . | . |
| .                  | .                  | .                  | .                  | . | . | . | . |
| Vv02g0716          | .                  | .                  | .                  | . | . | . | . |
| .                  | .                  | .                  | .                  | . | . | . | . |
| .                  | .                  | .                  | .                  | . | . | . | . |
| Vv02g0717          | .                  | .                  | .                  | . | . | . | . |
| .                  | .                  | .                  | .                  | . | . | . | . |
| .                  | .                  | .                  | .                  | . | . | . | . |
| Vv02g0718          | .                  | .                  | .                  | . | . | . | . |
| .                  | .                  | .                  | .                  | . | . | . | . |
| .                  | .                  | .                  | .                  | . | . | . | . |
| Vv02g0719          | .                  | .                  | .                  | . | . | . | . |
| .                  | .                  | .                  | .                  | . | . | . | . |
| .                  | .                  | .                  | .                  | . | . | . | . |
| Vv02g0720          | .                  | .                  | .                  | . | . | . | . |
| .                  | .                  | .                  | .                  | . | . | . | . |
| .                  | .                  | .                  | .                  | . | . | . | . |
| Vv02g0721          | .                  | .                  | .                  | . | . | . | . |

|           |                    |                    |                    |   |   |           |   |
|-----------|--------------------|--------------------|--------------------|---|---|-----------|---|
| .         | .                  | .                  | .                  | . | . | .         | . |
| .         | .                  | .                  | .                  | . | . | .         | . |
| Vv02g0722 | .                  | .                  | .                  | . | . | .         | . |
| .         | .                  | .                  | .                  | . | . | .         | . |
| Vv02g0723 | .                  | .                  | .                  | . | . | .         | . |
| .         | .                  | .                  | .                  | . | . | .         | . |
| Vv02g0724 | .                  | .                  | .                  | . | . | .         | . |
| .         | .                  | .                  | .                  | . | . | .         | . |
| Vv02g0725 | Tc03_g002180       | .                  | .                  | . | . | .         | . |
| .         | .                  | .                  | .                  | . | . | .         | . |
| Vv02g0726 | Tc03_g002440       | .                  | Gorai.003G180700.1 | . | . | .         | . |
| .         | Gorai.008G227600.1 | .                  | .                  | . | . | .         | . |
| .         | .                  | .                  | .                  | . | . | .         | . |
| Vv02g0727 | .                  | Gorai.004G186500.1 | .                  | . | . | .         | . |
| .         | .                  | .                  | .                  | . | . | .         | . |
| Vv02g0728 | .                  | .                  | .                  | . | . | .         | . |
| .         | .                  | .                  | .                  | . | . | .         | . |
| Vv02g0729 | Tc03_g022430       | .                  | .                  | . | . | .         | . |
| .         | .                  | .                  | .                  | . | . | .         | . |
| Vv02g0730 | .                  | .                  | .                  | . | . | .         | . |
| .         | .                  | .                  | .                  | . | . | .         | . |
| Vv02g0731 | .                  | .                  | .                  | . | . | .         | . |
| .         | .                  | .                  | .                  | . | . | .         | . |
| Vv02g0732 | .                  | .                  | .                  | . | . | .         | . |
| .         | .                  | .                  | .                  | . | . | .         | . |
| Vv02g0733 | .                  | .                  | .                  | . | . | .         | . |
| .         | .                  | .                  | .                  | . | . | .         | . |
| .         | Tc08_g008980       | .                  | .                  | . | . | Vv18g0466 | . |
| .         | Gorai.010G040100.1 | .                  | Gorai.009G236500.1 | . | . | .         | . |
| Vv02g0734 | .                  | .                  | .                  | . | . | .         | . |
| .         | .                  | .                  | .                  | . | . | .         | . |
| Vv02g0735 | .                  | .                  | .                  | . | . | .         | . |
| .         | .                  | .                  | .                  | . | . | .         | . |
| Vv02g0736 | .                  | .                  | .                  | . | . | .         | . |
| .         | .                  | .                  | .                  | . | . | .         | . |
| Vv02g0737 | .                  | .                  | .                  | . | . | .         | . |

|              |                    |                    |                    |                    |        |   |   |
|--------------|--------------------|--------------------|--------------------|--------------------|--------|---|---|
| .            | .                  | .                  | .                  | .                  | .      | . | . |
| .            | .                  | .                  | .                  | .                  | .      | . | . |
| Vv02g0738    | Tc03_g031180       | .                  | .                  | .                  | .      | . | . |
| .            | .                  | .                  | .                  | .                  | .      | . | . |
| .            | .                  | .                  | .                  | .                  | .      | . | . |
| Vv02g0739    | .                  | .                  | .                  | .                  | .      | . | . |
| .            | .                  | .                  | .                  | .                  | .      | . | . |
| .            | .                  | .                  | .                  | .                  | .      | . | . |
| Vv02g0740    | .                  | .                  | .                  | .                  | .      | . | . |
| Vv15g0015    | .                  | .                  | .                  | .                  | .      | . | . |
| .            | .                  | .                  | .                  | .                  | .      | . | . |
| Vv02g0741    | .                  | .                  | .                  | .                  | .      | . | . |
| .            | .                  | .                  | .                  | .                  | .      | . | . |
| .            | .                  | .                  | .                  | .                  | .      | . | . |
| Vv02g0742    | .                  | .                  | .                  | .                  | .      | . | . |
| .            | .                  | .                  | .                  | .                  | .      | . | . |
| .            | .                  | .                  | .                  | .                  | .      | . | . |
| Vv02g0743    | .                  | .                  | .                  | .                  | .      | . | . |
| .            | .                  | .                  | .                  | .                  | .      | . | . |
| .            | .                  | .                  | .                  | .                  | .      | . | . |
| Vv02g0744    | .                  | Gorai.004G185800.1 | .                  | Gorai.003G181300.1 | .      | . | . |
| .            | Gorai.008G226800.1 | .                  | Gorai.006G216400.1 | .                  | .      | . | . |
| .            | .                  | .                  | .                  | .                  | .      | . | . |
| .            | .                  | .                  | .                  | .                  | .      | . | . |
| Vv02g0745    | .                  | .                  | Gorai.003G181400.1 | .                  | .      | . | . |
| .            | .                  | .                  | .                  | .                  | .      | . | . |
| .            | .                  | .                  | .                  | .                  | .      | . | . |
| Vv02g0746    | .                  | Gorai.004G185700.1 | .                  | .                  | .      | . | . |
| .            | .                  | .                  | .                  | .                  | .      | . | . |
| .            | .                  | .                  | .                  | .                  | .      | . | . |
| Vv02g0747    | Tc03_g012040       | .                  | .                  | .                  | .      | . | . |
| Vv16g0119    | .                  | .                  | .                  | .                  | Gorai. | . | . |
| 008G226700.1 | .                  | .                  | .                  | .                  | .      | . | . |
| .            | .                  | .                  | .                  | .                  | .      | . | . |
| Vv02g0748    | .                  | .                  | .                  | Gorai.008G226700.1 | .      | . | . |
| .            | .                  | .                  | .                  | .                  | .      | . | . |
| .            | .                  | .                  | .                  | .                  | .      | . | . |
| Vv02g0749    | .                  | .                  | .                  | .                  | .      | . | . |
| .            | .                  | .                  | .                  | .                  | .      | . | . |
| .            | .                  | .                  | .                  | .                  | .      | . | . |
| Vv02g0750    | .                  | .                  | Gorai.003G181600.1 | Gorai.             | .      | . | . |
| 007G031800.1 | Gorai.008G226500.1 | .                  | .                  | .                  | .      | . | . |
| .            | .                  | .                  | .                  | .                  | .      | . | . |
| .            | .                  | .                  | .                  | .                  | .      | . | . |
| Vv02g0751    | .                  | Gorai.004G185400.1 | .                  | Gorai.003G181800.1 | .      | . | . |
| .            | .                  | Gorai.006G216500.1 | .                  | .                  | .      | . | . |
| .            | .                  | .                  | .                  | .                  | .      | . | . |
| .            | .                  | .                  | .                  | .                  | .      | . | . |
| Vv02g0752    | .                  | .                  | .                  | .                  | .      | . | . |
| .            | .                  | .                  | .                  | .                  | .      | . | . |

|                    |                    |                    |                    |
|--------------------|--------------------|--------------------|--------------------|
| Vv02g0753          | Tc03_g022840       | Gorai.004G184800.1 | Gorai.             |
| 003G182100.1       | Gorai.008G226300.1 | Gorai.006G216700.1 |                    |
| Vv02g0754          |                    |                    |                    |
| Vv02g0755          | Tc03_g023090       | Gorai.003G182200.1 |                    |
| Gorai.007G031900.1 | Gorai.008G226200.1 | Gorai.006G216800.1 |                    |
| Vv02g0756          |                    | Gorai.003G182400.1 | Gorai.             |
| 007G032000.1       |                    |                    |                    |
| Vv02g0757          |                    |                    |                    |
| Vv02g0758          |                    |                    |                    |
| Vv02g0759          |                    | Gorai.004G184600.1 | Gorai.             |
| 007G032300.1       |                    | Gorai.006G216900.1 |                    |
| Vv02g0760          |                    |                    |                    |
| Vv02g0761          |                    | Gorai.004G163500.1 | Gorai.003G183000.1 |
| Gorai.006G217100.1 | Gorai.007G032400.1 | Gorai.008G226100.1 | Gorai.             |
| 007G032400.1       | Vv16g0127          |                    | Gorai.             |
|                    | Gorai.008G226100.1 |                    |                    |
| Vv02g0762          |                    | Gorai.004G164100.1 | Gorai.003G183100.1 |
| Vv02g0763          |                    |                    |                    |
| Vv02g0764          | Tc03_g012150       | Gorai.003G183300.1 |                    |
| Gorai.007G032500.1 |                    |                    |                    |
| Vv02g0765          |                    |                    |                    |
| Vv02g0766          |                    | Gorai.007G032600.1 |                    |
| Gorai.008G225900.1 |                    |                    |                    |



|                    |                    |                    |                    |        |                    |   |   |
|--------------------|--------------------|--------------------|--------------------|--------|--------------------|---|---|
| .                  | .                  | .                  | .                  | .      | .                  | . | . |
| .                  | .                  | .                  | .                  | .      | .                  | . | . |
| Vv02g0767          | .                  | .                  | .                  | .      | Gorai.008G225800.1 | . | . |
|                    | Gorai.006G217200.1 | .                  | .                  | .      | .                  | . | . |
| .                  | .                  | .                  | .                  | .      | .                  | . | . |
| .                  | .                  | .                  | .                  | .      | .                  | . | . |
| Vv02g0768          | .                  | .                  | Gorai.003G183400.1 | .      | .                  | . | . |
| .                  | .                  | .                  | .                  | .      | .                  | . | . |
| .                  | .                  | .                  | .                  | .      | .                  | . | . |
| Vv02g0769          | .                  | .                  | .                  | .      | .                  | . | . |
| .                  | .                  | .                  | .                  | .      | .                  | . | . |
| .                  | .                  | .                  | .                  | .      | .                  | . | . |
| Vv02g0770          | .                  | .                  | .                  | .      | .                  | . | . |
| .                  | .                  | .                  | .                  | .      | .                  | . | . |
| .                  | .                  | .                  | .                  | .      | .                  | . | . |
| Vv02g0771          | .                  | .                  | .                  | .      | .                  | . | . |
| .                  | .                  | .                  | .                  | .      | .                  | . | . |
| .                  | .                  | .                  | .                  | .      | .                  | . | . |
| Vv02g0772          | .                  | .                  | .                  | .      | .                  | . | . |
| .                  | .                  | .                  | .                  | .      | .                  | . | . |
| .                  | .                  | .                  | .                  | .      | .                  | . | . |
| Vv02g0773          | Tc03_g031070       | Gorai.004G184200.1 | .                  | .      | .                  | . | . |
| Gorai.007G032700.1 | Gorai.008G225700.1 | Gorai.006G217300.1 | .                  | .      | .                  | . | . |
| .                  | .                  | .                  | .                  | .      | .                  | . | . |
| .                  | .                  | .                  | .                  | .      | .                  | . | . |
| Vv02g0774          | .                  | Gorai.007G032800.1 | .                  | .      | .                  | . | . |
| Gorai.008G225600.1 | .                  | Vv16g0130          | .                  | .      | .                  | . | . |
|                    | Gorai.007G032800.1 | Gorai.008G225600.1 | .                  | .      | .                  | . | . |
| .                  | .                  | .                  | .                  | .      | .                  | . | . |
| Vv02g0775          | .                  | .                  | .                  | .      | .                  | . | . |
| .                  | .                  | .                  | .                  | .      | .                  | . | . |
| .                  | .                  | .                  | .                  | .      | .                  | . | . |
| Vv02g0776          | .                  | .                  | .                  | .      | .                  | . | . |
| .                  | .                  | .                  | .                  | .      | .                  | . | . |
| .                  | .                  | .                  | .                  | .      | .                  | . | . |
| Vv02g0777          | .                  | .                  | .                  | .      | .                  | . | . |
| .                  | .                  | .                  | .                  | .      | .                  | . | . |
| .                  | .                  | .                  | .                  | .      | .                  | . | . |
| Vv02g0778          | .                  | Gorai.004G184100.1 | .                  | .      | .                  | . | . |
| .                  | Vv16g0141          | .                  | .                  | .      | .                  | . | . |
| .                  | .                  | .                  | .                  | .      | .                  | . | . |
| Vv02g0779          | .                  | Gorai.004G184000.1 | .                  | .      | .                  | . | . |
| .                  | .                  | .                  | .                  | .      | .                  | . | . |
| .                  | .                  | .                  | .                  | .      | .                  | . | . |
| Vv02g0780          | .                  | Gorai.004G183900.1 | .                  | Gorai. | .                  | . | . |
| 007G033000.1       | .                  | .                  | .                  | .      | .                  | . | . |
| .                  | .                  | .                  | .                  | .      | .                  | . | . |
| .                  | .                  | .                  | .                  | .      | .                  | . | . |
| Vv02g0781          | .                  | .                  | .                  | .      | .                  | . | . |
| .                  | .                  | .                  | .                  | .      | .                  | . | . |

|                    |                    |                    |   |                    |   |        |   |
|--------------------|--------------------|--------------------|---|--------------------|---|--------|---|
| Vv02g0782          | .                  | .                  | . | .                  | . | .      | . |
| .                  | .                  | .                  | . | .                  | . | .      | . |
| Vv02g0783          | Tc03_g029640       | .                  | . | .                  | . | Gorai. | . |
| 008G225500.1       | .                  | .                  | . | .                  | . | .      | . |
| Vv02g0784          | Tc03_g029650       | Gorai.004G183800.1 | . | .                  | . | Gorai. | . |
| 003G183600.1       | .                  | Gorai.006G217400.1 | . | .                  | . | .      | . |
| .                  | .                  | .                  | . | .                  | . | .      | . |
| Vv02g0785          | Tc03_g029660       | .                  | . | Gorai.007G033100.1 | . | .      | . |
| .                  | Gorai.006G217500.1 | Vv16g0145          | . | .                  | . | .      | . |
| .                  | Gorai.007G033100.1 | .                  | . | .                  | . | .      | . |
| Vv02g0786          | .                  | .                  | . | .                  | . | .      | . |
| .                  | .                  | .                  | . | .                  | . | .      | . |
| Vv02g0787          | Tc03_g029670       | .                  | . | Gorai.003G183700.1 | . | .      | . |
| .                  | .                  | .                  | . | .                  | . | .      | . |
| Vv02g0788          | .                  | .                  | . | .                  | . | .      | . |
| .                  | .                  | .                  | . | .                  | . | .      | . |
| Vv02g0789          | Tc03_g012420       | .                  | . | .                  | . | .      | . |
| .                  | .                  | .                  | . | .                  | . | .      | . |
| Vv02g0790          | Tc03_g030790       | .                  | . | .                  | . | .      | . |
| .                  | .                  | .                  | . | .                  | . | .      | . |
| Vv02g0791          | Tc03_g029700       | .                  | . | Gorai.003G183800.1 | . | .      | . |
| Gorai.008G225400.1 | .                  | .                  | . | .                  | . | .      | . |
| .                  | .                  | .                  | . | .                  | . | .      | . |
| Vv02g0792          | .                  | .                  | . | .                  | . | .      | . |
| .                  | .                  | .                  | . | .                  | . | .      | . |
| Vv02g0793          | .                  | .                  | . | .                  | . | .      | . |
| .                  | .                  | .                  | . | .                  | . | .      | . |
| Vv02g0794          | Tc03_g029710       | Gorai.004G183400.1 | . | .                  | . | .      | . |
| Gorai.007G033200.1 | .                  | .                  | . | .                  | . | .      | . |
| .                  | .                  | .                  | . | .                  | . | .      | . |
| Vv02g0795          | .                  | .                  | . | .                  | . | .      | . |
| .                  | .                  | .                  | . | .                  | . | .      | . |
| Vv02g0796          | .                  | .                  | . | .                  | . | .      | . |
| .                  | .                  | .                  | . | .                  | . | .      | . |
| .                  | .                  | .                  | . | .                  | . | .      | . |

|                    |                    |                    |   |                    |           |        |   |
|--------------------|--------------------|--------------------|---|--------------------|-----------|--------|---|
| Vv02g0797          | .                  | .                  | . | .                  | .         | .      | . |
| .                  | .                  | .                  | . | .                  | .         | .      | . |
| Vv02g0798          | .                  | .                  | . | .                  | .         | .      | . |
| .                  | .                  | .                  | . | .                  | .         | .      | . |
| Vv02g0799          | .                  | .                  | . | .                  | .         | .      | . |
| .                  | .                  | .                  | . | .                  | .         | .      | . |
| Vv02g0800          | Tc03_g029720       | .                  | . | .                  | .         | Gorai. | . |
| 008G225300.1       | .                  | .                  | . | .                  | .         | .      | . |
| .                  | .                  | .                  | . | .                  | .         | .      | . |
| Vv02g0801          | Tc03_g029740       | .                  | . | .                  | .         | .      | . |
| .                  | .                  | .                  | . | .                  | .         | .      | . |
| Vv02g0802          | Tc03_g029750       | Gorai.004G183200.1 | . | .                  | .         | .      | . |
| .                  | .                  | .                  | . | .                  | .         | .      | . |
| Vv02g0803          | .                  | .                  | . | .                  | .         | .      | . |
| .                  | .                  | .                  | . | .                  | .         | .      | . |
| Vv02g0804          | .                  | .                  | . | .                  | .         | .      | . |
| .                  | .                  | .                  | . | .                  | .         | .      | . |
| Vv02g0805          | .                  | .                  | . | .                  | .         | .      | . |
| .                  | .                  | .                  | . | .                  | .         | .      | . |
| Vv02g0806          | Tc03_g029760       | .                  | . | Gorai.003G183900.1 | .         | .      | . |
| Gorai.007G033300.1 | Gorai.008G225200.1 | .                  | . | .                  | Vv16g0162 | .      | . |
| .                  | .                  | Gorai.007G033300.1 | . | .                  | .         | .      | . |
| Vv02g0807          | .                  | .                  | . | .                  | .         | .      | . |
| .                  | .                  | .                  | . | .                  | .         | .      | . |
| Vv02g0808          | .                  | .                  | . | .                  | .         | .      | . |
| .                  | .                  | .                  | . | .                  | .         | .      | . |
| Vv02g0809          | Tc03_g029790       | .                  | . | .                  | .         | Gorai. | . |
| 008G224900.1       | .                  | .                  | . | .                  | .         | .      | . |
| .                  | .                  | .                  | . | .                  | .         | .      | . |
| Vv02g0810          | Tc03_g029800       | Gorai.004G183100.1 | . | .                  | .         | Gorai. | . |
| 003G184100.1       | .                  | Gorai.008G224800.1 | . | Gorai.006G217600.1 | .         | .      | . |
| Vv16g0163          | Tc03_g029800       | .                  | . | .                  | .         | .      | . |
| Gorai.008G224800.1 | .                  | .                  | . | .                  | .         | .      | . |
| .                  | .                  | .                  | . | .                  | .         | .      | . |
| Vv02g0811          | .                  | .                  | . | .                  | .         | .      | . |
| .                  | .                  | .                  | . | .                  | .         | .      | . |
| Vv02g0812          | Tc03_g029810       | .                  | . | Gorai.003G184200.1 | .         | .      | . |
| Gorai.008G224700.1 | .                  | .                  | . | Vv16g0164          | .         | .      | . |

|                    |              |                    |   |                    |   |
|--------------------|--------------|--------------------|---|--------------------|---|
| Tc03_g029810       | .            | .                  | . | Gorai.008G224700.1 | . |
| .                  | .            | .                  | . | .                  | . |
| Vv02g0813          | .            | .                  | . | .                  | . |
| .                  | .            | .                  | . | .                  | . |
| Vv02g0814          | .            | .                  | . | .                  | . |
| .                  | .            | .                  | . | .                  | . |
| Vv02g0815          | .            | .                  | . | .                  | . |
| .                  | .            | .                  | . | .                  | . |
| Vv02g0816          | .            | .                  | . | .                  | . |
| .                  | .            | .                  | . | .                  | . |
| Vv02g0817          | .            | .                  | . | .                  | . |
| .                  | .            | .                  | . | .                  | . |
| Vv02g0818          | .            | .                  | . | .                  | . |
| .                  | .            | .                  | . | .                  | . |
| Vv02g0819          | .            | .                  | . | .                  | . |
| .                  | .            | .                  | . | .                  | . |
| Vv02g0820          | .            | .                  | . | .                  | . |
| .                  | .            | .                  | . | .                  | . |
| Vv02g0821          | .            | .                  | . | .                  | . |
| .                  | .            | .                  | . | .                  | . |
| Vv02g0822          | .            | .                  | . | .                  | . |
| .                  | .            | .                  | . | .                  | . |
| Vv02g0823          | .            | .                  | . | .                  | . |
| .                  | .            | .                  | . | .                  | . |
| Vv02g0824          | Tc03_g030440 | .                  | . | Gorai.             | . |
| 008G224400.1       | Vv16g0168    | .                  | . | .                  | . |
| Gorai.008G224400.1 | .            | .                  | . | .                  | . |
| .                  | .            | .                  | . | .                  | . |
| Vv02g0825          | .            | .                  | . | .                  | . |
| .                  | .            | .                  | . | .                  | . |
| Vv02g0826          | Tc03_g029910 | Gorai.004G182600.1 | . | .                  | . |
| .                  | .            | .                  | . | .                  | . |
| Vv02g0827          | .            | .                  | . | .                  | . |
| .                  | .            | .                  | . | .                  | . |
| Vv02g0828          | .            | .                  | . | .                  | . |
| .                  | .            | .                  | . | .                  | . |

|                    |                    |                    |                    |        |   |        |   |
|--------------------|--------------------|--------------------|--------------------|--------|---|--------|---|
| Vv02g0829          | .                  | .                  | .                  | .      | . | .      | . |
| .                  | .                  | .                  | .                  | .      | . | .      | . |
| Vv02g0830          | .                  | .                  | .                  | .      | . | .      | . |
| .                  | .                  | .                  | .                  | .      | . | .      | . |
| Vv02g0831          | .                  | .                  | .                  | .      | . | .      | . |
| .                  | .                  | .                  | .                  | .      | . | .      | . |
| Vv02g0832          | .                  | .                  | .                  | .      | . | .      | . |
| .                  | .                  | .                  | .                  | .      | . | .      | . |
| Vv02g0833          | .                  | .                  | Gorai.003G184900.1 | .      | . | .      | . |
| .                  | .                  | .                  | .                  | .      | . | .      | . |
| Vv02g0834          | .                  | .                  | .                  | .      | . | Gorai. | . |
| 006G217700.1       | .                  | .                  | .                  | .      | . | .      | . |
| Vv02g0835          | .                  | .                  | .                  | .      | . | .      | . |
| .                  | .                  | .                  | .                  | .      | . | .      | . |
| Vv02g0836          | .                  | .                  | .                  | .      | . | .      | . |
| .                  | .                  | .                  | .                  | .      | . | .      | . |
| Vv02g0837          | .                  | .                  | .                  | .      | . | .      | . |
| .                  | .                  | .                  | .                  | .      | . | .      | . |
| Vv02g0838          | .                  | .                  | .                  | .      | . | .      | . |
| .                  | .                  | .                  | .                  | .      | . | .      | . |
| Vv02g0839          | .                  | .                  | .                  | .      | . | .      | . |
| .                  | .                  | .                  | .                  | .      | . | .      | . |
| Vv02g0840          | Tc03_g029980       | .                  | Gorai.003G185400.1 | .      | . | .      | . |
| Gorai.008G224000.1 | .                  | .                  | .                  | .      | . | .      | . |
| .                  | .                  | .                  | .                  | .      | . | .      | . |
| Vv02g0841          | .                  | .                  | .                  | .      | . | .      | . |
| .                  | .                  | .                  | .                  | .      | . | .      | . |
| Vv02g0842          | .                  | .                  | .                  | .      | . | .      | . |
| .                  | .                  | .                  | .                  | .      | . | .      | . |
| Vv02g0843          | Tc03_g029990       | Gorai.004G182200.1 | .                  | Gorai. | . | .      | . |
| 003G185500.1       | Gorai.007G033500.1 | .                  | .                  | .      | . | .      | . |
| .                  | .                  | .                  | .                  | .      | . | .      | . |
| Vv02g0844          | Tc03_g030000       | .                  | .                  | Gorai. | . | .      | . |
| 008G223800.1       | .                  | .                  | .                  | .      | . | .      | . |

|                                 |              |                    |        |   |        |   |
|---------------------------------|--------------|--------------------|--------|---|--------|---|
| Vv02g0845<br>008G223700.1       | Tc03_g030010 | .                  | .      | . | Gorai. | . |
| Vv02g0846<br>Gorai.008G223600.1 | Tc03_g030020 | Gorai.004G182100.1 | .      | . | .      | . |
| Vv02g0847                       | .            | .                  | .      | . | .      | . |
| Vv02g0848                       | .            | .                  | .      | . | .      | . |
| Vv02g0849                       | Tc03_g030030 | Gorai.003G185600.1 | .      | . | .      | . |
| Vv02g0850<br>003G185700.1       | Tc03_g030050 | Gorai.004G181900.1 | Gorai. | . | .      | . |
| Vv02g0851                       | .            | .                  | .      | . | .      | . |
| Vv02g0852                       | .            | .                  | .      | . | .      | . |
| Vv02g0853                       | Tc03_g030060 | Gorai.004G181800.1 | .      | . | .      | . |
| Vv02g0854                       | .            | .                  | .      | . | .      | . |
| Vv02g0855                       | .            | .                  | .      | . | .      | . |
| Vv02g0856                       | Tc03_g030330 | .                  | .      | . | .      | . |
| Vv02g0857                       | Tc03_g030320 | .                  | .      | . | .      | . |
| Vv02g0858                       | .            | .                  | .      | . | .      | . |
| Vv02g0859                       | .            | .                  | .      | . | .      | . |
| Vv02g0860                       | .            | .                  | .      | . | .      | . |

|              |              |                    |   |                    |        |   |   |
|--------------|--------------|--------------------|---|--------------------|--------|---|---|
| Vv02g0861    | .            | .                  | . | .                  | .      | . | . |
| .            | .            | .                  | . | .                  | .      | . | . |
| Vv02g0862    | .            | .                  | . | .                  | .      | . | . |
| .            | .            | .                  | . | .                  | .      | . | . |
| Vv02g0863    | .            | .                  | . | .                  | .      | . | . |
| .            | .            | .                  | . | .                  | .      | . | . |
| Vv02g0864    | .            | .                  | . | .                  | .      | . | . |
| .            | .            | .                  | . | .                  | .      | . | . |
| Vv02g0865    | .            | .                  | . | .                  | .      | . | . |
| .            | .            | .                  | . | .                  | .      | . | . |
| Vv02g0866    | .            | .                  | . | .                  | .      | . | . |
| .            | .            | .                  | . | .                  | .      | . | . |
| Vv02g0867    | .            | .                  | . | .                  | .      | . | . |
| .            | .            | .                  | . | .                  | .      | . | . |
| Vv02g0868    | .            | .                  | . | .                  | .      | . | . |
| .            | .            | .                  | . | .                  | .      | . | . |
| Vv02g0869    | .            | .                  | . | .                  | .      | . | . |
| .            | .            | .                  | . | .                  | .      | . | . |
| Vv02g0870    | .            | .                  | . | .                  | .      | . | . |
| .            | .            | .                  | . | .                  | .      | . | . |
| Vv02g0871    | .            | .                  | . | .                  | .      | . | . |
| .            | .            | .                  | . | .                  | .      | . | . |
| Vv02g0872    | .            | .                  | . | .                  | .      | . | . |
| .            | .            | .                  | . | .                  | .      | . | . |
| Vv02g0873    | Tc03_g030090 | .                  | . | Gorai.003G186000.1 | .      | . | . |
| .            | .            | .                  | . | .                  | .      | . | . |
| Vv02g0874    | .            | .                  | . | .                  | .      | . | . |
| .            | .            | .                  | . | .                  | .      | . | . |
| Vv02g0875    | Tc03_g030110 | .                  | . | .                  | Gorai. | . | . |
| 008G223300.1 | .            | .                  | . | .                  | .      | . | . |
| Vv02g0876    | Tc03_g030120 | Gorai.004G181600.1 | . | .                  | .      | . | . |
| .            | .            | .                  | . | .                  | .      | . | . |
| Vv02g0877    | .            | .                  | . | .                  | .      | . | . |

|           |                                    |                                          |                    |   |
|-----------|------------------------------------|------------------------------------------|--------------------|---|
| Vv02g0878 | Tc03_g030130<br>Gorai.008G223200.1 | Gorai.004G181500.1                       | .                  | . |
| Vv02g0879 | .                                  | .                                        | .                  | . |
| Vv02g0880 | .                                  | .                                        | Gorai.008G220300.1 | . |
| Vv02g0881 | .                                  | .                                        | .                  | . |
| Vv02g0882 | Tc03_g030140<br>003G186200.1       | Gorai.004G180900.1<br>Gorai.007G033600.1 | Gorai.             | . |
| Vv02g0883 | .                                  | .                                        | .                  | . |
| Vv02g0884 | .                                  | .                                        | .                  | . |
| Vv02g0885 | .                                  | .                                        | .                  | . |
| Vv02g0886 | Tc03_g030160                       | .                                        | Gorai.007G033700.1 | . |
| Vv02g0887 | .                                  | .                                        | .                  | . |
| Vv02g0888 | Tc03_g030250                       | .                                        | .                  | . |
| Vv02g0889 | .                                  | .                                        | .                  | . |
| Vv02g0890 | .                                  | .                                        | .                  | . |
| Vv02g0891 | .                                  | .                                        | .                  | . |
| Vv02g0892 | .                                  | .                                        | .                  | . |
| Vv02g0893 | .                                  | .                                        | .                  | . |



|           |              |   |                    |   |   |   |   |
|-----------|--------------|---|--------------------|---|---|---|---|
| .         | .            | . | .                  | . | . | . | . |
| Vv02g0894 | .            | . | .                  | . | . | . | . |
| .         | .            | . | .                  | . | . | . | . |
| Vv02g0895 | .            | . | .                  | . | . | . | . |
| .         | .            | . | .                  | . | . | . | . |
| Vv02g0896 | .            | . | .                  | . | . | . | . |
| .         | .            | . | .                  | . | . | . | . |
| Vv02g0897 | .            | . | Gorai.003G186500.1 | . | . | . | . |
| .         | .            | . | .                  | . | . | . | . |
| Vv02g0898 | .            | . | .                  | . | . | . | . |
| .         | .            | . | .                  | . | . | . | . |
| Vv02g0899 | .            | . | .                  | . | . | . | . |
| .         | .            | . | .                  | . | . | . | . |
| Vv02g0900 | Tc03_g030320 | . | .                  | . | . | . | . |
| .         | .            | . | .                  | . | . | . | . |
| Vv02g0901 | .            | . | .                  | . | . | . | . |
| .         | .            | . | .                  | . | . | . | . |
| Vv02g0902 | .            | . | .                  | . | . | . | . |
| .         | .            | . | .                  | . | . | . | . |
| Vv02g0903 | Tc03_g030330 | . | .                  | . | . | . | . |
| .         | .            | . | .                  | . | . | . | . |
| Vv02g0904 | .            | . | .                  | . | . | . | . |
| .         | .            | . | .                  | . | . | . | . |
| Vv02g0905 | .            | . | .                  | . | . | . | . |
| .         | .            | . | .                  | . | . | . | . |
| Vv02g0906 | .            | . | .                  | . | . | . | . |
| .         | .            | . | .                  | . | . | . | . |
| Vv02g0907 | .            | . | .                  | . | . | . | . |
| .         | .            | . | .                  | . | . | . | . |
| Vv02g0908 | .            | . | .                  | . | . | . | . |
| .         | .            | . | .                  | . | . | . | . |
| Vv02g0909 | .            | . | .                  | . | . | . | . |
| .         | .            | . | .                  | . | . | . | . |
| .         | .            | . | .                  | . | . | . | . |

|           |   |   |   |   |   |   |   |
|-----------|---|---|---|---|---|---|---|
| Vv02g0910 | . | . | . | . | . | . | . |
| .         | . | . | . | . | . | . | . |
| Vv02g0911 | . | . | . | . | . | . | . |
| .         | . | . | . | . | . | . | . |
| Vv02g0912 | . | . | . | . | . | . | . |
| .         | . | . | . | . | . | . | . |
| Vv02g0913 | . | . | . | . | . | . | . |
| .         | . | . | . | . | . | . | . |
| Vv02g0914 | . | . | . | . | . | . | . |
| .         | . | . | . | . | . | . | . |
| Vv02g0915 | . | . | . | . | . | . | . |
| .         | . | . | . | . | . | . | . |
| Vv02g0916 | . | . | . | . | . | . | . |
| .         | . | . | . | . | . | . | . |
| Vv02g0917 | . | . | . | . | . | . | . |
| .         | . | . | . | . | . | . | . |
| Vv02g0918 | . | . | . | . | . | . | . |
| .         | . | . | . | . | . | . | . |
| Vv02g0919 | . | . | . | . | . | . | . |
| .         | . | . | . | . | . | . | . |
| Vv02g0920 | . | . | . | . | . | . | . |
| .         | . | . | . | . | . | . | . |
| Vv02g0921 | . | . | . | . | . | . | . |
| .         | . | . | . | . | . | . | . |
| Vv02g0922 | . | . | . | . | . | . | . |
| .         | . | . | . | . | . | . | . |
| Vv02g0923 | . | . | . | . | . | . | . |
| .         | . | . | . | . | . | . | . |
| Vv02g0924 | . | . | . | . | . | . | . |
| .         | . | . | . | . | . | . | . |
| Vv02g0925 | . | . | . | . | . | . | . |
| .         | . | . | . | . | . | . | . |
| Vv02g0926 | . | . | . | . | . | . | . |
| .         | . | . | . | . | . | . | . |

|           |   |   |   |   |   |   |   |
|-----------|---|---|---|---|---|---|---|
| Vv02g0927 | . | . | . | . | . | . | . |
| .         | . | . | . | . | . | . | . |
| Vv02g0928 | . | . | . | . | . | . | . |
| .         | . | . | . | . | . | . | . |
| Vv02g0929 | . | . | . | . | . | . | . |
| .         | . | . | . | . | . | . | . |
| Vv02g0930 | . | . | . | . | . | . | . |
| .         | . | . | . | . | . | . | . |
| Vv02g0931 | . | . | . | . | . | . | . |
| .         | . | . | . | . | . | . | . |
| Vv02g0932 | . | . | . | . | . | . | . |
| .         | . | . | . | . | . | . | . |
| Vv02g0933 | . | . | . | . | . | . | . |
| .         | . | . | . | . | . | . | . |
| Vv02g0934 | . | . | . | . | . | . | . |
| .         | . | . | . | . | . | . | . |
| Vv02g0935 | . | . | . | . | . | . | . |
| .         | . | . | . | . | . | . | . |
| Vv02g0936 | . | . | . | . | . | . | . |
| .         | . | . | . | . | . | . | . |
| Vv02g0937 | . | . | . | . | . | . | . |
| .         | . | . | . | . | . | . | . |
| Vv02g0938 | . | . | . | . | . | . | . |
| .         | . | . | . | . | . | . | . |
| Vv02g0939 | . | . | . | . | . | . | . |
| .         | . | . | . | . | . | . | . |
| Vv02g0940 | . | . | . | . | . | . | . |
| .         | . | . | . | . | . | . | . |
| Vv02g0941 | . | . | . | . | . | . | . |
| .         | . | . | . | . | . | . | . |
| Vv02g0942 | . | . | . | . | . | . | . |
| .         | . | . | . | . | . | . | . |
| Vv02g0943 | . | . | . | . | . | . | . |

|           |              |                    |   |   |
|-----------|--------------|--------------------|---|---|
| Vv02g0944 | Tc03_g030510 | Gorai.004G179300.1 | . | . |
| Vv02g0945 | .            | .                  | . | . |
| Vv02g0946 | .            | .                  | . | . |
| Vv02g0947 | .            | .                  | . | . |
| Vv02g0948 | .            | .                  | . | . |
| Vv02g0949 | .            | .                  | . | . |
| Vv02g0950 | .            | .                  | . | . |
| Vv02g0951 | .            | .                  | . | . |
| Vv02g0952 | .            | Gorai.004G179600.1 | . | . |
| Vv02g0953 | .            | .                  | . | . |
| Vv02g0954 | .            | .                  | . | . |
| Vv02g0955 | .            | .                  | . | . |
| Vv02g0956 | .            | .                  | . | . |
| Vv02g0957 | .            | .                  | . | . |
| Vv02g0958 | .            | .                  | . | . |
| Vv02g0959 | .            | .                  | . | . |

|           |                    |                    |   |   |   |   |   |
|-----------|--------------------|--------------------|---|---|---|---|---|
| Vv02g0960 | .                  | .                  | . | . | . | . | . |
| .         | .                  | .                  | . | . | . | . | . |
| Vv02g0961 | Tc03_g030490       | .                  | . | . | . | . | . |
| .         | .                  | .                  | . | . | . | . | . |
| Vv02g0962 | .                  | .                  | . | . | . | . | . |
| .         | .                  | .                  | . | . | . | . | . |
| Vv02g0963 | .                  | .                  | . | . | . | . | . |
| .         | .                  | .                  | . | . | . | . | . |
| Vv02g0964 | .                  | .                  | . | . | . | . | . |
| .         | .                  | .                  | . | . | . | . | . |
| Vv02g0965 | Tc03_g030480       | .                  | . | . | . | . | . |
| .         | .                  | .                  | . | . | . | . | . |
| Vv02g0966 | .                  | .                  | . | . | . | . | . |
| .         | .                  | .                  | . | . | . | . | . |
| Vv02g0967 | .                  | .                  | . | . | . | . | . |
| .         | .                  | .                  | . | . | . | . | . |
| Vv02g0968 | .                  | .                  | . | . | . | . | . |
| .         | .                  | .                  | . | . | . | . | . |
| Vv02g0969 | .                  | .                  | . | . | . | . | . |
| .         | .                  | .                  | . | . | . | . | . |
| Vv02g0970 | .                  | .                  | . | . | . | . | . |
| .         | .                  | .                  | . | . | . | . | . |
| Vv02g0971 | .                  | .                  | . | . | . | . | . |
| .         | .                  | .                  | . | . | . | . | . |
| Vv02g0972 | .                  | .                  | . | . | . | . | . |
| .         | .                  | .                  | . | . | . | . | . |
| Vv02g0973 | Tc03_g030470       | Gorai.004G179700.1 | . | . | . | . | . |
| .         | .                  | .                  | . | . | . | . | . |
| Vv02g0974 | Tc03_g018020       | .                  | . | . | . | . | . |
| .         | .                  | .                  | . | . | . | . | . |
| Vv02g0975 | Tc03_g018220       | Gorai.006G060900.1 | . | . | . | . | . |
| .         | Gorai.006G189600.1 | .                  | . | . | . | . | . |
| .         | .                  | .                  | . | . | . | . | . |
| Vv02g0976 | Tc03_g030460       | .                  | . | . | . | . | . |

|           |                    |  |                    |  |  |  |
|-----------|--------------------|--|--------------------|--|--|--|
| Vv02g0977 |                    |  |                    |  |  |  |
| Vv02g0978 | Tc03_g030450       |  | Gorai.004G179800.1 |  |  |  |
| Vv02g0979 |                    |  |                    |  |  |  |
| Vv02g0980 |                    |  | Gorai.004G179900.1 |  |  |  |
| Vv02g0981 | Tc03_g030440       |  | Gorai.004G180000.1 |  |  |  |
| Vv02g0982 | Tc03_g030430       |  | Gorai.004G180100.1 |  |  |  |
| Vv02g0983 |                    |  |                    |  |  |  |
| Vv02g0984 |                    |  |                    |  |  |  |
| Vv02g0985 | Tc03_g018360       |  | Gorai.006G064000.1 |  |  |  |
|           | Gorai.006G192400.1 |  |                    |  |  |  |
| Vv02g0986 |                    |  |                    |  |  |  |
| Vv02g0987 |                    |  |                    |  |  |  |
| Vv02g0988 |                    |  |                    |  |  |  |
| Vv02g0989 |                    |  |                    |  |  |  |
| Vv02g0990 |                    |  |                    |  |  |  |
| Vv02g0991 |                    |  |                    |  |  |  |
| Vv02g0992 |                    |  |                    |  |  |  |

|           |   |   |   |   |   |   |   |
|-----------|---|---|---|---|---|---|---|
| Vv02g0993 | . | . | . | . | . | . | . |
| .         | . | . | . | . | . | . | . |
| Vv02g0994 | . | . | . | . | . | . | . |
| .         | . | . | . | . | . | . | . |
| Vv02g0995 | . | . | . | . | . | . | . |
| .         | . | . | . | . | . | . | . |
| Vv02g0996 | . | . | . | . | . | . | . |
| .         | . | . | . | . | . | . | . |
| Vv02g0997 | . | . | . | . | . | . | . |
| .         | . | . | . | . | . | . | . |
| Vv02g0998 | . | . | . | . | . | . | . |
| .         | . | . | . | . | . | . | . |
| Vv02g0999 | . | . | . | . | . | . | . |
| .         | . | . | . | . | . | . | . |
| Vv02g1000 | . | . | . | . | . | . | . |
| .         | . | . | . | . | . | . | . |
| Vv02g1001 | . | . | . | . | . | . | . |
| .         | . | . | . | . | . | . | . |
| Vv02g1002 | . | . | . | . | . | . | . |
| .         | . | . | . | . | . | . | . |
| Vv02g1003 | . | . | . | . | . | . | . |
| .         | . | . | . | . | . | . | . |
| Vv02g1004 | . | . | . | . | . | . | . |
| .         | . | . | . | . | . | . | . |
| Vv02g1005 | . | . | . | . | . | . | . |
| .         | . | . | . | . | . | . | . |
| Vv02g1006 | . | . | . | . | . | . | . |
| .         | . | . | . | . | . | . | . |
| Vv02g1007 | . | . | . | . | . | . | . |
| .         | . | . | . | . | . | . | . |
| Vv02g1008 | . | . | . | . | . | . | . |
| .         | . | . | . | . | . | . | . |
| Vv02g1009 | . | . | . | . | . | . | . |

|           |   |                    |   |   |   |   |   |
|-----------|---|--------------------|---|---|---|---|---|
| .         | . | .                  | . | . | . | . | . |
| Vv02g1010 | . | .                  | . | . | . | . | . |
| .         | . | .                  | . | . | . | . | . |
| Vv02g1011 | . | .                  | . | . | . | . | . |
| .         | . | .                  | . | . | . | . | . |
| Vv02g1012 | . | .                  | . | . | . | . | . |
| .         | . | .                  | . | . | . | . | . |
| Vv02g1013 | . | .                  | . | . | . | . | . |
| .         | . | .                  | . | . | . | . | . |
| Vv02g1014 | . | Gorai.004G180200.1 | . | . | . | . | . |
| .         | . | .                  | . | . | . | . | . |
| Vv02g1015 | . | .                  | . | . | . | . | . |
| .         | . | .                  | . | . | . | . | . |
| Vv02g1016 | . | .                  | . | . | . | . | . |
| .         | . | .                  | . | . | . | . | . |
| Vv02g1017 | . | .                  | . | . | . | . | . |
| .         | . | .                  | . | . | . | . | . |
| Vv02g1018 | . | .                  | . | . | . | . | . |
| .         | . | .                  | . | . | . | . | . |
| Vv02g1019 | . | .                  | . | . | . | . | . |
| .         | . | .                  | . | . | . | . | . |
| Vv02g1020 | . | .                  | . | . | . | . | . |
| .         | . | .                  | . | . | . | . | . |
| Vv02g1021 | . | .                  | . | . | . | . | . |
| .         | . | .                  | . | . | . | . | . |
| Vv02g1022 | . | .                  | . | . | . | . | . |
| .         | . | .                  | . | . | . | . | . |
| Vv02g1023 | . | .                  | . | . | . | . | . |
| .         | . | .                  | . | . | . | . | . |
| Vv02g1024 | . | .                  | . | . | . | . | . |
| .         | . | .                  | . | . | . | . | . |
| Vv02g1025 | . | .                  | . | . | . | . | . |
| .         | . | .                  | . | . | . | . | . |
| .         | . | .                  | . | . | . | . | . |



|           |   |   |   |   |   |   |   |
|-----------|---|---|---|---|---|---|---|
| Vv02g1026 | . | . | . | . | . | . | . |
| .         | . | . | . | . | . | . | . |
| Vv02g1027 | . | . | . | . | . | . | . |
| .         | . | . | . | . | . | . | . |
| Vv02g1028 | . | . | . | . | . | . | . |
| .         | . | . | . | . | . | . | . |
| Vv02g1029 | . | . | . | . | . | . | . |
| .         | . | . | . | . | . | . | . |
| Vv02g1030 | . | . | . | . | . | . | . |
| .         | . | . | . | . | . | . | . |
| Vv02g1031 | . | . | . | . | . | . | . |
| .         | . | . | . | . | . | . | . |
| Vv02g1032 | . | . | . | . | . | . | . |
| .         | . | . | . | . | . | . | . |
| Vv02g1033 | . | . | . | . | . | . | . |
| .         | . | . | . | . | . | . | . |
| Vv02g1034 | . | . | . | . | . | . | . |
| .         | . | . | . | . | . | . | . |
| Vv02g1035 | . | . | . | . | . | . | . |
| .         | . | . | . | . | . | . | . |
| Vv02g1036 | . | . | . | . | . | . | . |
| .         | . | . | . | . | . | . | . |
| Vv02g1037 | . | . | . | . | . | . | . |
| .         | . | . | . | . | . | . | . |
| Vv02g1038 | . | . | . | . | . | . | . |
| .         | . | . | . | . | . | . | . |
| Vv02g1039 | . | . | . | . | . | . | . |
| .         | . | . | . | . | . | . | . |
| Vv02g1040 | . | . | . | . | . | . | . |
| .         | . | . | . | . | . | . | . |
| Vv02g1041 | . | . | . | . | . | . | . |
| .         | . | . | . | . | . | . | . |
| Vv02g1042 | . | . | . | . | . | . | . |
| .         | . | . | . | . | . | . | . |

|           |   |   |   |   |   |   |   |
|-----------|---|---|---|---|---|---|---|
| Vv02g1043 | . | . | . | . | . | . | . |
| .         | . | . | . | . | . | . | . |
| Vv02g1044 | . | . | . | . | . | . | . |
| .         | . | . | . | . | . | . | . |
| Vv02g1045 | . | . | . | . | . | . | . |
| .         | . | . | . | . | . | . | . |
| Vv02g1046 | . | . | . | . | . | . | . |
| .         | . | . | . | . | . | . | . |
| Vv02g1047 | . | . | . | . | . | . | . |
| .         | . | . | . | . | . | . | . |
| Vv02g1048 | . | . | . | . | . | . | . |
| .         | . | . | . | . | . | . | . |
| Vv02g1049 | . | . | . | . | . | . | . |
| .         | . | . | . | . | . | . | . |
| Vv02g1050 | . | . | . | . | . | . | . |
| .         | . | . | . | . | . | . | . |
| Vv02g1051 | . | . | . | . | . | . | . |
| .         | . | . | . | . | . | . | . |
| Vv02g1052 | . | . | . | . | . | . | . |
| .         | . | . | . | . | . | . | . |
| Vv02g1053 | . | . | . | . | . | . | . |
| .         | . | . | . | . | . | . | . |
| Vv02g1054 | . | . | . | . | . | . | . |
| .         | . | . | . | . | . | . | . |
| Vv02g1055 | . | . | . | . | . | . | . |
| .         | . | . | . | . | . | . | . |
| Vv02g1056 | . | . | . | . | . | . | . |
| .         | . | . | . | . | . | . | . |
| Vv02g1057 | . | . | . | . | . | . | . |
| .         | . | . | . | . | . | . | . |
| Vv02g1058 | . | . | . | . | . | . | . |
| .         | . | . | . | . | . | . | . |
| Vv02g1059 | . | . | . | . | . | . | . |

|           |   |   |   |   |   |   |   |
|-----------|---|---|---|---|---|---|---|
| .         | . | . | . | . | . | . | . |
| Vv02g1060 | . | . | . | . | . | . | . |
| .         | . | . | . | . | . | . | . |
| Vv02g1061 | . | . | . | . | . | . | . |
| .         | . | . | . | . | . | . | . |
| Vv02g1062 | . | . | . | . | . | . | . |
| .         | . | . | . | . | . | . | . |
| Vv02g1063 | . | . | . | . | . | . | . |
| .         | . | . | . | . | . | . | . |
| Vv02g1064 | . | . | . | . | . | . | . |
| .         | . | . | . | . | . | . | . |
| Vv02g1065 | . | . | . | . | . | . | . |
| .         | . | . | . | . | . | . | . |
| Vv02g1066 | . | . | . | . | . | . | . |
| .         | . | . | . | . | . | . | . |
| Vv02g1067 | . | . | . | . | . | . | . |
| .         | . | . | . | . | . | . | . |
| Vv02g1068 | . | . | . | . | . | . | . |
| .         | . | . | . | . | . | . | . |
| Vv02g1069 | . | . | . | . | . | . | . |
| .         | . | . | . | . | . | . | . |
| Vv02g1070 | . | . | . | . | . | . | . |
| .         | . | . | . | . | . | . | . |
| Vv02g1071 | . | . | . | . | . | . | . |
| .         | . | . | . | . | . | . | . |
| Vv02g1072 | . | . | . | . | . | . | . |
| .         | . | . | . | . | . | . | . |
| Vv02g1073 | . | . | . | . | . | . | . |
| .         | . | . | . | . | . | . | . |
| Vv02g1074 | . | . | . | . | . | . | . |
| .         | . | . | . | . | . | . | . |
| Vv02g1075 | . | . | . | . | . | . | . |
| .         | . | . | . | . | . | . | . |
| .         | . | . | . | . | . | . | . |

|             |              |   |   |   |   |   |   |
|-------------|--------------|---|---|---|---|---|---|
| Vv02g1076   | .            | . | . | . | . | . | . |
| .           | .            | . | . | . | . | . | . |
| .           | .            | . | . | . | . | . | . |
| Vv02g1077   | .            | . | . | . | . | . | . |
| Vv0Unrg2494 | .            | . | . | . | . | . | . |
| .           | .            | . | . | . | . | . | . |
| Vv02g1078   | .            | . | . | . | . | . | . |
| .           | .            | . | . | . | . | . | . |
| .           | .            | . | . | . | . | . | . |
| Vv02g1079   | .            | . | . | . | . | . | . |
| .           | .            | . | . | . | . | . | . |
| .           | .            | . | . | . | . | . | . |
| Vv02g1080   | .            | . | . | . | . | . | . |
| .           | .            | . | . | . | . | . | . |
| .           | .            | . | . | . | . | . | . |
| Vv02g1081   | .            | . | . | . | . | . | . |
| .           | .            | . | . | . | . | . | . |
| .           | .            | . | . | . | . | . | . |
| Vv02g1082   | .            | . | . | . | . | . | . |
| .           | .            | . | . | . | . | . | . |
| .           | .            | . | . | . | . | . | . |
| Vv02g1083   | .            | . | . | . | . | . | . |
| .           | .            | . | . | . | . | . | . |
| .           | .            | . | . | . | . | . | . |
| Vv02g1084   | .            | . | . | . | . | . | . |
| .           | .            | . | . | . | . | . | . |
| .           | .            | . | . | . | . | . | . |
| Vv02g1085   | Tc03_g014330 | . | . | . | . | . | . |
| Vv0Unrg2482 | .            | . | . | . | . | . | . |
| .           | .            | . | . | . | . | . | . |
| Vv02g1086   | .            | . | . | . | . | . | . |
| .           | .            | . | . | . | . | . | . |
| .           | .            | . | . | . | . | . | . |
| Vv02g1087   | .            | . | . | . | . | . | . |
| .           | .            | . | . | . | . | . | . |
| .           | .            | . | . | . | . | . | . |
| Vv02g1088   | Tc03_g014340 | . | . | . | . | . | . |
| Vv0Unrg2481 | .            | . | . | . | . | . | . |
| .           | .            | . | . | . | . | . | . |
| Vv02g1089   | .            | . | . | . | . | . | . |
| .           | .            | . | . | . | . | . | . |
| .           | .            | . | . | . | . | . | . |
| Vv02g1090   | Tc03_g014350 | . | . | . | . | . | . |
| Vv0Unrg2478 | .            | . | . | . | . | . | . |
| .           | .            | . | . | . | . | . | . |
| Vv02g1091   | .            | . | . | . | . | . | . |
| .           | .            | . | . | . | . | . | . |
| .           | .            | . | . | . | . | . | . |
| Vv02g1092   | .            | . | . | . | . | . | . |
| Vv0Unrg2474 | .            | . | . | . | . | . | . |

|             |              |   |   |   |   |   |
|-------------|--------------|---|---|---|---|---|
| Vv02g1093   | Tc03_g014360 | . | . | . | . | . |
| Vv0Unrg2473 | .            | . | . | . | . | . |
| Vv02g1094   | .            | . | . | . | . | . |
| Vv0Unrg2471 | .            | . | . | . | . | . |
| Vv02g1095   | .            | . | . | . | . | . |
| Vv02g1096   | .            | . | . | . | . | . |
| Vv02g1097   | .            | . | . | . | . | . |
| Vv02g1098   | .            | . | . | . | . | . |
| Vv02g1099   | .            | . | . | . | . | . |
| Vv02g1100   | .            | . | . | . | . | . |
| Vv02g1101   | Tc03_g014470 | . | . | . | . | . |
| Vv02g1102   | .            | . | . | . | . | . |
| Vv02g1103   | .            | . | . | . | . | . |
| Vv02g1104   | .            | . | . | . | . | . |
| Vv02g1105   | .            | . | . | . | . | . |
| Vv02g1106   | .            | . | . | . | . | . |
| Vv02g1107   | .            | . | . | . | . | . |
| Vv02g1108   | .            | . | . | . | . | . |
| Vv0Unrg2469 | .            | . | . | . | . | . |
| Vv02g1109   | .            | . | . | . | . | . |

|           |              |   |   |   |   |   |   |
|-----------|--------------|---|---|---|---|---|---|
| .         | .            | . | . | . | . | . | . |
| Vv02g1110 | .            | . | . | . | . | . | . |
| .         | .            | . | . | . | . | . | . |
| Vv02g1111 | .            | . | . | . | . | . | . |
| .         | .            | . | . | . | . | . | . |
| Vv02g1112 | .            | . | . | . | . | . | . |
| .         | .            | . | . | . | . | . | . |
| Vv02g1113 | Tc03_g010380 | . | . | . | . | . | . |
| .         | .            | . | . | . | . | . | . |
| Vv02g1114 | .            | . | . | . | . | . | . |
| .         | .            | . | . | . | . | . | . |
| Vv02g1115 | .            | . | . | . | . | . | . |
| .         | .            | . | . | . | . | . | . |
| Vv02g1116 | .            | . | . | . | . | . | . |
| .         | .            | . | . | . | . | . | . |
| Vv02g1117 | .            | . | . | . | . | . | . |
| .         | .            | . | . | . | . | . | . |
| Vv02g1118 | .            | . | . | . | . | . | . |
| .         | .            | . | . | . | . | . | . |
| Vv02g1119 | .            | . | . | . | . | . | . |
| .         | .            | . | . | . | . | . | . |
| Vv02g1120 | .            | . | . | . | . | . | . |
| .         | .            | . | . | . | . | . | . |
| Vv02g1121 | .            | . | . | . | . | . | . |
| .         | .            | . | . | . | . | . | . |
| Vv02g1122 | .            | . | . | . | . | . | . |
| .         | .            | . | . | . | . | . | . |
| Vv02g1123 | .            | . | . | . | . | . | . |
| .         | .            | . | . | . | . | . | . |
| Vv02g1124 | Tc03_g031320 | . | . | . | . | . | . |
| .         | .            | . | . | . | . | . | . |
| Vv02g1125 | .            | . | . | . | . | . | . |
| .         | .            | . | . | . | . | . | . |
| .         | .            | . | . | . | . | . | . |

|              |              |   |   |   |        |
|--------------|--------------|---|---|---|--------|
| Vv02g1126    | Tc03_g031310 | . | . | . | Gorai. |
| 008G217700.1 | .            | . | . | . | .      |
| .            | .            | . | . | . | .      |
| Vv02g1127    | .            | . | . | . | .      |
| .            | .            | . | . | . | .      |
| Vv02g1128    | .            | . | . | . | .      |
| .            | .            | . | . | . | .      |
| .            | .            | . | . | . | .      |
| Vv02g1129    | Tc03_g010600 | . | . | . | .      |
| .            | .            | . | . | . | .      |
| .            | .            | . | . | . | .      |
| Vv02g1130    | Tc03_g031290 | . | . | . | .      |
| .            | .            | . | . | . | .      |
| .            | .            | . | . | . | .      |
| Vv02g1131    | Tc03_g010710 | . | . | . | .      |
| .            | .            | . | . | . | .      |
| .            | .            | . | . | . | .      |
| Vv02g1132    | .            | . | . | . | .      |
| .            | .            | . | . | . | .      |
| .            | .            | . | . | . | .      |
| Vv02g1133    | .            | . | . | . | .      |
| .            | .            | . | . | . | .      |
| .            | .            | . | . | . | .      |
| Vv02g1134    | .            | . | . | . | .      |
| .            | .            | . | . | . | .      |
| .            | .            | . | . | . | .      |
| Vv02g1135    | .            | . | . | . | .      |
| .            | .            | . | . | . | .      |
| .            | .            | . | . | . | .      |
| Vv02g1136    | .            | . | . | . | .      |
| .            | .            | . | . | . | .      |
| .            | .            | . | . | . | .      |
| Vv02g1137    | .            | . | . | . | .      |
| .            | .            | . | . | . | .      |
| .            | .            | . | . | . | .      |
| Vv02g1138    | .            | . | . | . | .      |
| .            | .            | . | . | . | .      |
| .            | .            | . | . | . | .      |
| Vv02g1139    | .            | . | . | . | .      |
| .            | .            | . | . | . | .      |
| .            | .            | . | . | . | .      |
| Vv02g1140    | .            | . | . | . | .      |
| .            | .            | . | . | . | .      |
| .            | .            | . | . | . | .      |
| Vv02g1141    | .            | . | . | . | .      |
| .            | .            | . | . | . | .      |
| .            | .            | . | . | . | .      |
| Vv02g1142    | .            | . | . | . | .      |
| .            | .            | . | . | . | .      |

|           |                    |                    |   |   |   |   |   |
|-----------|--------------------|--------------------|---|---|---|---|---|
| Vv02g1143 | .                  | .                  | . | . | . | . | . |
| .         | .                  | .                  | . | . | . | . | . |
| Vv02g1144 | .                  | .                  | . | . | . | . | . |
| .         | .                  | .                  | . | . | . | . | . |
| Vv02g1145 | .                  | .                  | . | . | . | . | . |
| .         | .                  | .                  | . | . | . | . | . |
| Vv02g1146 | Tc03_g011010       | .                  | . | . | . | . | . |
| .         | .                  | .                  | . | . | . | . | . |
| Vv02g1147 | Tc03_g031250       | .                  | . | . | . | . | . |
| .         | .                  | .                  | . | . | . | . | . |
| Vv02g1148 | .                  | .                  | . | . | . | . | . |
| .         | .                  | .                  | . | . | . | . | . |
| Vv02g1149 | .                  | .                  | . | . | . | . | . |
| .         | .                  | .                  | . | . | . | . | . |
| Vv02g1150 | .                  | .                  | . | . | . | . | . |
| .         | .                  | .                  | . | . | . | . | . |
| Vv02g1151 | .                  | .                  | . | . | . | . | . |
| .         | .                  | .                  | . | . | . | . | . |
| Vv02g1152 | .                  | .                  | . | . | . | . | . |
| .         | .                  | .                  | . | . | . | . | . |
| Vv02g1153 | Gorai.004G174900.1 | .                  | . | . | . | . | . |
| .         | .                  | .                  | . | . | . | . | . |
| Vv02g1154 | .                  | .                  | . | . | . | . | . |
| .         | .                  | .                  | . | . | . | . | . |
| Vv02g1155 | Tc03_g031240       | Gorai.004G175200.1 | . | . | . | . | . |
| .         | .                  | .                  | . | . | . | . | . |
| Vv02g1156 | Tc03_g031220       | Gorai.004G175500.1 | . | . | . | . | . |
| .         | .                  | .                  | . | . | . | . | . |
| Vv02g1157 | Gorai.004G175600.1 | .                  | . | . | . | . | . |
| .         | .                  | .                  | . | . | . | . | . |
| Vv02g1158 | Tc03_g031210       | .                  | . | . | . | . | . |
| .         | .                  | .                  | . | . | . | . | . |
| Vv02g1159 | .                  | .                  | . | . | . | . | . |



|                    |              |                    |   |   |   |        |   |
|--------------------|--------------|--------------------|---|---|---|--------|---|
| .                  | .            | .                  | . | . | . | .      | . |
| .                  | .            | .                  | . | . | . | .      | . |
| Vv02g1160          | .            | .                  | . | . | . | .      | . |
| .                  | .            | .                  | . | . | . | .      | . |
| .                  | .            | .                  | . | . | . | .      | . |
| Vv02g1161          | .            | Gorai.004G254300.1 | . | . | . | .      | . |
| Gorai.008G217800.1 | .            | .                  | . | . | . | .      | . |
| .                  | .            | .                  | . | . | . | .      | . |
| .                  | .            | .                  | . | . | . | .      | . |
| Vv02g1162          | .            | Gorai.004G254200.1 | . | . | . | .      | . |
| .                  | .            | .                  | . | . | . | .      | . |
| .                  | .            | .                  | . | . | . | .      | . |
| Vv02g1163          | Tc03_g031200 | .                  | . | . | . | .      | . |
| .                  | .            | .                  | . | . | . | .      | . |
| .                  | .            | .                  | . | . | . | .      | . |
| Vv02g1164          | .            | .                  | . | . | . | .      | . |
| .                  | .            | .                  | . | . | . | .      | . |
| .                  | .            | .                  | . | . | . | .      | . |
| Vv02g1165          | Tc03_g031190 | .                  | . | . | . | .      | . |
| .                  | .            | .                  | . | . | . | .      | . |
| .                  | .            | .                  | . | . | . | .      | . |
| Vv02g1166          | .            | .                  | . | . | . | .      | . |
| .                  | .            | .                  | . | . | . | .      | . |
| .                  | .            | .                  | . | . | . | .      | . |
| Vv02g1167          | Tc03_g031180 | .                  | . | . | . | .      | . |
| .                  | .            | .                  | . | . | . | .      | . |
| .                  | .            | .                  | . | . | . | .      | . |
| Vv02g1168          | Tc03_g031170 | .                  | . | . | . | Gorai. | . |
| 008G217900.1       | .            | .                  | . | . | . | .      | . |
| .                  | .            | .                  | . | . | . | .      | . |
| Vv02g1169          | .            | .                  | . | . | . | .      | . |
| .                  | .            | .                  | . | . | . | .      | . |
| .                  | .            | .                  | . | . | . | .      | . |
| Vv02g1170          | .            | .                  | . | . | . | .      | . |
| .                  | .            | .                  | . | . | . | .      | . |
| .                  | .            | .                  | . | . | . | .      | . |
| Vv02g1171          | .            | .                  | . | . | . | .      | . |
| .                  | .            | .                  | . | . | . | .      | . |
| .                  | .            | .                  | . | . | . | .      | . |
| Vv02g1172          | Tc03_g031140 | Gorai.004G254000.1 | . | . | . | .      | . |
| .                  | .            | .                  | . | . | . | .      | . |
| .                  | .            | .                  | . | . | . | .      | . |
| Vv02g1173          | Tc03_g031130 | .                  | . | . | . | .      | . |
| .                  | .            | .                  | . | . | . | .      | . |
| .                  | .            | .                  | . | . | . | .      | . |
| Vv02g1174          | Tc03_g031120 | .                  | . | . | . | Gorai. | . |
| 008G218100.1       | .            | .                  | . | . | . | .      | . |
| .                  | .            | .                  | . | . | . | .      | . |
| Vv02g1175          | Tc03_g031110 | .                  | . | . | . | Gorai. | . |
| 008G218200.1       | .            | .                  | . | . | . | .      | . |

|              |              |                    |   |   |   |        |   |
|--------------|--------------|--------------------|---|---|---|--------|---|
| Vv02g1176    | .            | .                  | . | . | . | .      | . |
| .            | .            | .                  | . | . | . | .      | . |
| Vv02g1177    | Tc03_g031100 | Gorai.004G176200.1 | . | . | . | .      | . |
| .            | .            | .                  | . | . | . | .      | . |
| Vv02g1178    | Tc03_g031080 | Gorai.004G176300.1 | . | . | . | .      | . |
| .            | .            | .                  | . | . | . | .      | . |
| Vv02g1179    | Tc03_g031070 | Gorai.004G176400.1 | . | . | . | .      | . |
| .            | .            | .                  | . | . | . | .      | . |
| Vv02g1180    | Tc03_g031060 | .                  | . | . | . | Gorai. | . |
| 008G218300.1 | .            | .                  | . | . | . | .      | . |
| .            | .            | .                  | . | . | . | .      | . |
| Vv02g1181    | .            | .                  | . | . | . | .      | . |
| .            | .            | .                  | . | . | . | .      | . |
| Vv02g1182    | Tc03_g031030 | .                  | . | . | . | Gorai. | . |
| 008G218400.1 | .            | .                  | . | . | . | .      | . |
| .            | .            | .                  | . | . | . | .      | . |
| Vv02g1183    | .            | Gorai.004G176500.1 | . | . | . | .      | . |
| .            | .            | .                  | . | . | . | .      | . |
| Vv02g1184    | Tc03_g031020 | .                  | . | . | . | .      | . |
| .            | .            | .                  | . | . | . | .      | . |
| Vv02g1185    | .            | .                  | . | . | . | .      | . |
| .            | .            | .                  | . | . | . | .      | . |
| Vv02g1186    | .            | .                  | . | . | . | .      | . |
| .            | .            | .                  | . | . | . | .      | . |
| Vv02g1187    | .            | .                  | . | . | . | .      | . |
| .            | .            | .                  | . | . | . | .      | . |
| Vv02g1188    | .            | .                  | . | . | . | .      | . |
| .            | .            | .                  | . | . | . | .      | . |
| Vv02g1189    | .            | .                  | . | . | . | .      | . |
| .            | .            | .                  | . | . | . | .      | . |
| Vv02g1190    | .            | .                  | . | . | . | .      | . |
| .            | .            | .                  | . | . | . | .      | . |
| Vv02g1191    | Tc03_g031000 | Gorai.004G176600.1 | . | . | . | .      | . |
| .            | .            | .                  | . | . | . | .      | . |
| Vv02g1192    | .            | .                  | . | . | . | .      | . |

|           |                    |                    |   |   |   |   |   |
|-----------|--------------------|--------------------|---|---|---|---|---|
| .         | .                  | .                  | . | . | . | . | . |
| .         | .                  | .                  | . | . | . | . | . |
| Vv02g1193 | .                  | .                  | . | . | . | . | . |
| .         | .                  | .                  | . | . | . | . | . |
| Vv02g1194 | .                  | .                  | . | . | . | . | . |
| .         | .                  | .                  | . | . | . | . | . |
| Vv02g1195 | .                  | .                  | . | . | . | . | . |
| .         | .                  | .                  | . | . | . | . | . |
| Vv02g1196 | Tc03_g030980       | .                  | . | . | . | . | . |
| .         | .                  | .                  | . | . | . | . | . |
| Vv02g1197 | .                  | .                  | . | . | . | . | . |
| .         | .                  | .                  | . | . | . | . | . |
| Vv02g1198 | .                  | .                  | . | . | . | . | . |
| .         | .                  | .                  | . | . | . | . | . |
| Vv02g1199 | Tc03_g030970       | .                  | . | . | . | . | . |
| .         | .                  | .                  | . | . | . | . | . |
| Vv02g1200 | Tc03_g030960       | .                  | . | . | . | . | . |
| .         | .                  | .                  | . | . | . | . | . |
| Vv02g1201 | .                  | .                  | . | . | . | . | . |
| .         | .                  | .                  | . | . | . | . | . |
| Vv02g1202 | Tc03_g030940       | .                  | . | . | . | . | . |
| .         | .                  | .                  | . | . | . | . | . |
| Vv02g1203 | .                  | .                  | . | . | . | . | . |
| .         | .                  | .                  | . | . | . | . | . |
| Vv02g1204 | Tc03_g030930       | Gorai.004G177000.1 | . | . | . | . | . |
|           | Gorai.008G218700.1 | .                  | . | . | . | . | . |
| .         | .                  | .                  | . | . | . | . | . |
| Vv02g1205 | Tc03_g030920       | Gorai.004G177100.1 | . | . | . | . | . |
|           | Gorai.008G218800.1 | .                  | . | . | . | . | . |
| .         | .                  | .                  | . | . | . | . | . |
| Vv02g1206 | Tc03_g030910       | Gorai.004G177200.1 | . | . | . | . | . |
|           | Gorai.008G218900.1 | .                  | . | . | . | . | . |
| .         | .                  | .                  | . | . | . | . | . |
| Vv02g1207 | Tc03_g030890       | .                  | . | . | . | . | . |
| .         | .                  | .                  | . | . | . | . | . |
| .         | .                  | .                  | . | . | . | . | . |



|                    |              |                    |   |   |   |        |   |
|--------------------|--------------|--------------------|---|---|---|--------|---|
| Vv02g1224          | .            | .                  | . | . | . | .      | . |
| .                  | .            | .                  | . | . | . | .      | . |
| Vv02g1225          | .            | .                  | . | . | . | .      | . |
| .                  | .            | .                  | . | . | . | .      | . |
| Vv02g1226          | Tc03_g030770 | Gorai.004G178300.1 | . | . | . | .      | . |
| Gorai.008G219600.1 | .            | .                  | . | . | . | .      | . |
| .                  | .            | .                  | . | . | . | .      | . |
| Vv02g1227          | Tc03_g030750 | .                  | . | . | . | Gorai. | . |
| 008G219800.1       | .            | .                  | . | . | . | .      | . |
| .                  | .            | .                  | . | . | . | .      | . |
| Vv02g1228          | .            | .                  | . | . | . | .      | . |
| .                  | .            | .                  | . | . | . | .      | . |
| Vv02g1229          | .            | .                  | . | . | . | .      | . |
| .                  | .            | .                  | . | . | . | .      | . |
| Vv02g1230          | .            | .                  | . | . | . | .      | . |
| .                  | .            | .                  | . | . | . | .      | . |
| Vv02g1231          | .            | .                  | . | . | . | .      | . |
| .                  | .            | .                  | . | . | . | .      | . |
| Vv02g1232          | .            | .                  | . | . | . | .      | . |
| .                  | .            | .                  | . | . | . | .      | . |
| Vv02g1233          | .            | .                  | . | . | . | .      | . |
| .                  | .            | .                  | . | . | . | .      | . |
| Vv02g1234          | .            | .                  | . | . | . | .      | . |
| .                  | .            | .                  | . | . | . | .      | . |
| Vv02g1235          | .            | .                  | . | . | . | .      | . |
| .                  | .            | .                  | . | . | . | .      | . |
| Vv02g1236          | .            | .                  | . | . | . | .      | . |
| .                  | .            | .                  | . | . | . | .      | . |
| Vv02g1237          | .            | .                  | . | . | . | .      | . |
| .                  | .            | .                  | . | . | . | .      | . |
| Vv03g0001          | .            | .                  | . | . | . | .      | . |
| .                  | .            | .                  | . | . | . | .      | . |
| Vv03g0002          | Tc02_g007890 | .                  | . | . | . | .      | . |
| .                  | .            | .                  | . | . | . | .      | . |
| Vv03g0003          | .            | .                  | . | . | . | .      | . |

|              |                    |                    |                    |                    |   |           |   |
|--------------|--------------------|--------------------|--------------------|--------------------|---|-----------|---|
| .            | .                  | .                  | .                  | .                  | . | .         | . |
| .            | .                  | .                  | .                  | .                  | . | .         | . |
| Vv03g0004    | .                  | .                  | .                  | .                  | . | .         | . |
| .            | .                  | .                  | .                  | .                  | . | .         | . |
| Vv03g0005    | Tc02_g007620       | Gorai.013G034700.1 | .                  | .                  | . | .         | . |
|              | Gorai.008G031000.1 | .                  | .                  | .                  | . | .         | . |
| .            | .                  | .                  | .                  | .                  | . | .         | . |
| .            | .                  | .                  | .                  | .                  | . | .         | . |
| Vv03g0006    | Tc02_g007610       | Gorai.013G034600.1 | Gorai.             | .                  | . | .         | . |
| 005G246400.1 | .                  | Gorai.008G031100.1 | .                  | .                  | . | Vv18g1150 | . |
|              | Tc08_g002700       | .                  | .                  | .                  | . | Gorai.    | . |
| 010G007800.1 | .                  | .                  | .                  | .                  | . | .         | . |
| Vv03g0007    | .                  | .                  | .                  | .                  | . | .         | . |
| .            | .                  | .                  | .                  | .                  | . | .         | . |
| .            | .                  | .                  | .                  | .                  | . | .         | . |
| Vv03g0008    | Tc02_g007600       | .                  | .                  | .                  | . | .         | . |
| .            | .                  | .                  | .                  | .                  | . | .         | . |
| Vv04g1216    | Tc01_g002450       | .                  | .                  | Gorai.007G199400.1 | . | .         | . |
| .            | .                  | .                  | .                  | .                  | . | .         | . |
| Vv03g0009    | Tc02_g007590       | Gorai.013G034200.1 | Gorai.             | .                  | . | .         | . |
| 005G246500.1 | .                  | .                  | .                  | .                  | . | .         | . |
| .            | .                  | .                  | .                  | .                  | . | .         | . |
| .            | .                  | .                  | .                  | .                  | . | .         | . |
| Vv03g0010    | .                  | .                  | .                  | .                  | . | .         | . |
| .            | .                  | .                  | .                  | .                  | . | .         | . |
| .            | .                  | .                  | .                  | .                  | . | .         | . |
| Vv03g0011    | Tc02_g007580       | Gorai.005G246600.1 | .                  | .                  | . | .         | . |
| .            | .                  | Vv18g1164          | .                  | .                  | . | .         | . |
| .            | .                  | Vv04g1226          | Tc01_g002380       | .                  | . | .         | . |
|              | Gorai.007G198900.1 | Gorai.003G011900.1 | .                  | .                  | . | .         | . |
| Vv03g0012    | .                  | .                  | .                  | .                  | . | .         | . |
| .            | .                  | .                  | .                  | .                  | . | .         | . |
| .            | .                  | .                  | .                  | .                  | . | .         | . |
| Vv03g0013    | Tc02_g007560       | .                  | .                  | Gorai.002G004900.1 | . | .         | . |
| .            | Gorai.012G154700.1 | .                  | .                  | .                  | . | .         | . |
| .            | .                  | .                  | .                  | .                  | . | .         | . |
| .            | .                  | .                  | .                  | .                  | . | .         | . |
| Vv03g0014    | .                  | .                  | .                  | .                  | . | .         | . |
| .            | .                  | .                  | .                  | .                  | . | .         | . |
| .            | .                  | .                  | .                  | .                  | . | .         | . |
| Vv03g0015    | .                  | Gorai.013G034000.1 | Gorai.005G246800.1 | .                  | . | .         | . |
| .            | .                  | Vv18g1174          | Tc08_g002840       | .                  | . | .         | . |
| .            | Gorai.009G197700.1 | .                  | .                  | .                  | . | .         | . |
| .            | .                  | .                  | .                  | .                  | . | .         | . |
| Vv03g0016    | Tc02_g007550       | .                  | .                  | .                  | . | .         | . |
|              | Vv18g1175          | Tc08_g002850       | Gorai.             | .                  | . | .         | . |
| 009G197600.1 | .                  | Gorai.010G007100.1 | .                  | .                  | . | .         | . |
| .            | .                  | .                  | .                  | .                  | . | .         | . |
| .            | .                  | .                  | .                  | .                  | . | .         | . |
| Vv03g0017    | .                  | .                  | .                  | .                  | . | .         | . |

|                    |                    |                    |                    |   |   |   |   |
|--------------------|--------------------|--------------------|--------------------|---|---|---|---|
| .                  | .                  | .                  | .                  | . | . | . | . |
| .                  | .                  | .                  | .                  | . | . | . | . |
| Vv03g0018          | .                  | .                  | Gorai.005G246900.1 | . | . | . | . |
| .                  | .                  | .                  | .                  | . | . | . | . |
| .                  | .                  | .                  | .                  | . | . | . | . |
| Vv03g0019          | .                  | .                  | .                  | . | . | . | . |
| .                  | .                  | .                  | .                  | . | . | . | . |
| .                  | .                  | .                  | .                  | . | . | . | . |
| Vv03g0020          | Tc02_g007540       | Gorai.013G033800.1 | Gorai.             | . | . | . | . |
| 005G247000.1       | .                  | Vv18g1185          | .                  | . | . | . | . |
| .                  | .                  | .                  | .                  | . | . | . | . |
| .                  | .                  | .                  | .                  | . | . | . | . |
| Vv03g0021          | Tc02_g007530       | Gorai.013G033700.1 | .                  | . | . | . | . |
| Gorai.002G004800.1 | .                  | Vv18g1186          | .                  | . | . | . | . |
| Tc08_g002900       | Gorai.002G125700.1 | .                  | .                  | . | . | . | . |
| .                  | .                  | .                  | .                  | . | . | . | . |
| Vv03g0022          | Tc02_g007520       | Gorai.013G033600.1 | .                  | . | . | . | . |
| .                  | .                  | .                  | .                  | . | . | . | . |
| .                  | .                  | .                  | .                  | . | . | . | . |
| Vv03g0023          | Tc02_g007510       | Gorai.013G033500.1 | Gorai.             | . | . | . | . |
| 005G247100.1       | .                  | Vv18g1188          | .                  | . | . | . | . |
| Tc08_g002910       | Gorai.002G125600.1 | Gorai.005G110600.1 | .                  | . | . | . | . |
| Gorai.009G197300.1 | .                  | Gorai.010G006800.1 | Vv04g1235          | . | . | . | . |
| Tc01_g002320       | .                  | Gorai.007G198100.1 | .                  | . | . | . | . |
| Gorai.003G011800.1 | .                  | .                  | .                  | . | . | . | . |
| Vv03g0024          | .                  | .                  | .                  | . | . | . | . |
| .                  | .                  | .                  | .                  | . | . | . | . |
| .                  | .                  | .                  | .                  | . | . | . | . |
| Vv03g0025          | Tc02_g007440       | Gorai.013G033400.1 | .                  | . | . | . | . |
| Gorai.002G004700.1 | .                  | Gorai.012G154400.1 | Vv18g1195          | . | . | . | . |
| Tc08_g002980       | .                  | Gorai.005G110700.1 | Gorai.             | . | . | . | . |
| 009G197000.1       | Gorai.010G006600.1 | .                  | .                  | . | . | . | . |
| .                  | .                  | .                  | .                  | . | . | . | . |
| Vv03g0026          | .                  | .                  | .                  | . | . | . | . |
| .                  | .                  | .                  | .                  | . | . | . | . |
| .                  | .                  | .                  | .                  | . | . | . | . |
| Vv03g0027          | Tc02_g007430       | Gorai.013G033200.1 | .                  | . | . | . | . |
| Gorai.002G004600.1 | .                  | Gorai.012G154300.1 | .                  | . | . | . | . |
| .                  | .                  | .                  | .                  | . | . | . | . |
| .                  | .                  | .                  | .                  | . | . | . | . |
| Vv03g0028          | Tc02_g007420       | Gorai.013G033100.1 | .                  | . | . | . | . |
| .                  | .                  | .                  | .                  | . | . | . | . |
| .                  | .                  | .                  | .                  | . | . | . | . |
| Vv03g0029          | Tc02_g007410       | .                  | Gorai.002G004500.1 | . | . | . | . |
| Gorai.008G031600.1 | .                  | .                  | .                  | . | . | . | . |
| .                  | .                  | .                  | .                  | . | . | . | . |
| .                  | .                  | .                  | .                  | . | . | . | . |
| Vv03g0030          | Tc02_g007400       | .                  | Gorai.             | . | . | . | . |
| 008G031700.1       | .                  | .                  | .                  | . | . | . | . |
| .                  | .                  | .                  | .                  | . | . | . | . |
| .                  | .                  | .                  | .                  | . | . | . | . |

|                    |                    |                    |                    |           |
|--------------------|--------------------|--------------------|--------------------|-----------|
| Vv03g0031          | Tc02_g007390       | .                  | Gorai.005G247500.1 | .         |
| .                  | .                  | .                  | .                  | .         |
| Vv03g0032          | Tc02_g007350       | .                  | Gorai.005G247600.1 | .         |
| .                  | .                  | .                  | .                  | .         |
| Vv03g0033          | Tc02_g007330       | .                  | Gorai.005G247700.1 | .         |
| Gorai.002G004400.1 | .                  | .                  | .                  | .         |
| .                  | .                  | .                  | .                  | .         |
| Vv03g0034          | Tc02_g007310       | .                  | Gorai.005G247800.1 | .         |
| Gorai.002G004300.1 | .                  | .                  | Vv18g1196          | .         |
| .                  | .                  | .                  | .                  | .         |
| Vv03g0035          | Tc02_g007300       | Gorai.013G033000.1 | .                  | .         |
| .                  | .                  | .                  | .                  | .         |
| Vv03g0036          | .                  | Gorai.013G032900.1 | Gorai.005G247900.1 | .         |
| .                  | .                  | .                  | .                  | .         |
| .                  | .                  | Vv04g1244          | Tc01_g002210       | .         |
| Gorai.007G197900.1 | .                  | .                  | .                  | .         |
| Vv03g0037          | .                  | .                  | .                  | .         |
| .                  | .                  | .                  | .                  | .         |
| Vv03g0038          | .                  | .                  | .                  | .         |
| .                  | .                  | .                  | .                  | Vv04g1247 |
| Tc01_g002180       | .                  | .                  | .                  | .         |
| Vv03g0039          | .                  | .                  | .                  | .         |
| .                  | .                  | .                  | .                  | .         |
| Vv03g0040          | Tc02_g006470       | Gorai.013G032800.1 | .                  | .         |
| .                  | .                  | .                  | .                  | .         |
| Vv03g0041          | Tc02_g006450       | Gorai.013G032700.1 | Gorai.             | .         |
| 005G248000.1       | .                  | .                  | .                  | .         |
| .                  | .                  | Vv04g1249          | .                  | .         |
| Gorai.008G064500.1 | Gorai.007G197600.1 | .                  | .                  | .         |
| Vv03g0042          | .                  | .                  | .                  | .         |
| .                  | .                  | .                  | .                  | .         |
| Vv03g0043          | Tc02_g006440       | .                  | Gorai.005G248100.1 | .         |
| .                  | .                  | .                  | .                  | .         |
| Vv03g0044          | Tc02_g006430       | .                  | Gorai.005G248200.1 | .         |
| .                  | .                  | .                  | .                  | .         |
| .                  | Vv04g1251          | Tc01_g002130       | .                  | .         |
| Gorai.003G011400.1 | .                  | Gorai.011G099700.1 | .                  | .         |
| Vv03g0045          | .                  | Gorai.005G248300.1 | .                  | .         |
| .                  | .                  | .                  | .                  | .         |
| .                  | .                  | .                  | .                  | .         |



|                    |                    |                    |                    |        |
|--------------------|--------------------|--------------------|--------------------|--------|
| Vv03g0046          | Tc02_g006420       | Gorai.013G032600.1 | .                  | .      |
|                    | Gorai.008G031800.1 | .                  | .                  | .      |
| .                  | .                  | .                  | .                  | .      |
| .                  | .                  | .                  | .                  | .      |
| Vv03g0047          | Tc02_g006410       | .                  | .                  | Gorai. |
| 008G031900.1       | .                  | .                  | .                  | .      |
| .                  | .                  | .                  | .                  | .      |
| Vv03g0048          | .                  | .                  | .                  | .      |
| .                  | .                  | .                  | .                  | .      |
| .                  | .                  | .                  | .                  | .      |
| Vv03g0049          | .                  | .                  | .                  | .      |
| .                  | .                  | .                  | .                  | .      |
| .                  | .                  | .                  | .                  | .      |
| Vv03g0050          | Tc02_g006400       | Gorai.013G032400.1 | .                  | .      |
| .                  | .                  | .                  | .                  | .      |
| .                  | Vv04g1260          | Tc01_g002090       | .                  | Gorai. |
| 008G064200.1       | .                  | .                  | .                  | .      |
| Vv03g0051          | Tc02_g006390       | Gorai.013G032300.1 | .                  | .      |
| Gorai.002G004700.1 | .                  | .                  | .                  | .      |
| .                  | .                  | Vv04g1263          | Tc01_g002070       | .      |
|                    | Gorai.008G064100.1 | Gorai.007G196900.1 | Gorai.             | .      |
| 003G011200.1       | Gorai.011G099600.1 | .                  | .                  | .      |
| Vv03g0052          | Tc02_g006380       | Gorai.005G248400.1 | .                  | .      |
| Gorai.002G004600.1 | .                  | Gorai.012G154300.1 | Vv18g1202          | .      |
|                    | Tc08_g003030       | .                  | Gorai.009G196700.1 | .      |
|                    | Gorai.010G006400.1 | Vv04g1265          | Tc01_g002040       | .      |
|                    | Gorai.008G063800.1 | Gorai.007G196800.1 | .                  | .      |
| Vv03g0053          | .                  | .                  | .                  | .      |
| .                  | .                  | .                  | .                  | .      |
| .                  | .                  | .                  | .                  | .      |
| Vv03g0054          | .                  | .                  | .                  | .      |
| .                  | .                  | .                  | .                  | .      |
| .                  | .                  | .                  | .                  | .      |
| Vv03g0055          | Tc02_g006360       | .                  | .                  | .      |
| .                  | .                  | .                  | .                  | .      |
| .                  | .                  | .                  | .                  | .      |
| Vv03g0056          | Tc02_g006350       | .                  | Gorai.005G248600.1 | .      |
| .                  | .                  | .                  | .                  | .      |
| .                  | .                  | .                  | .                  | .      |
| Vv03g0057          | Tc02_g006340       | .                  | .                  | Gorai. |
| 008G032200.1       | Gorai.012G154200.1 | .                  | .                  | .      |
| .                  | .                  | .                  | .                  | .      |
| .                  | .                  | .                  | .                  | .      |
| Vv03g0058          | .                  | .                  | .                  | .      |
| .                  | .                  | .                  | .                  | .      |
| .                  | .                  | .                  | .                  | .      |
| Vv03g0059          | Tc02_g006330       | .                  | Gorai.005G248700.1 | .      |
| .                  | Gorai.012G154100.1 | .                  | .                  | .      |
| .                  | .                  | .                  | .                  | .      |
| .                  | .                  | .                  | .                  | .      |

|                    |                    |                    |                    |   |
|--------------------|--------------------|--------------------|--------------------|---|
| Vv03g0060          | Tc02_g006320       | .                  | Gorai.005G248800.1 | . |
| Gorai.002G004000.1 | .                  | Gorai.012G154000.1 | Vv18g1206          | . |
| Tc08_g003070       | .                  | .                  | Gorai.             | . |
| 010G006100.1       | .                  | .                  | .                  | . |
| Vv03g0061          | Tc02_g006310       | Gorai.013G029300.1 | .                  | . |
| Gorai.002G003900.1 | .                  | Gorai.012G153900.1 | .                  | . |
| .                  | .                  | .                  | .                  | . |
| .                  | .                  | .                  | .                  | . |
| Vv03g0062          | Tc02_g006300       | .                  | .                  | . |
| .                  | .                  | .                  | .                  | . |
| Vv04g1271          | Tc01_g002000       | .                  | Gorai.             | . |
| 003G010800.1       | .                  | .                  | .                  | . |
| Vv03g0063          | .                  | .                  | .                  | . |
| .                  | .                  | .                  | .                  | . |
| .                  | .                  | .                  | .                  | . |
| Vv03g0064          | Tc02_g006270       | Gorai.005G248900.1 | .                  | . |
| .                  | Vv18g1217          | Tc08_g003160       | .                  | . |
| .                  | .                  | .                  | .                  | . |
| .                  | .                  | .                  | .                  | . |
| Vv03g0065          | Tc02_g006260       | .                  | .                  | . |
| .                  | .                  | .                  | .                  | . |
| .                  | .                  | .                  | .                  | . |
| Vv03g0066          | Tc02_g006250       | Gorai.005G249000.1 | .                  | . |
| Gorai.008G032300.1 | .                  | .                  | .                  | . |
| .                  | .                  | .                  | .                  | . |
| .                  | .                  | .                  | .                  | . |
| Vv03g0067          | Tc02_g006240       | .                  | .                  | . |
| .                  | .                  | .                  | .                  | . |
| .                  | .                  | .                  | .                  | . |
| Vv03g0068          | Tc02_g006230       | .                  | .                  | . |
| .                  | .                  | .                  | .                  | . |
| .                  | .                  | .                  | .                  | . |
| Vv03g0069          | .                  | .                  | .                  | . |
| .                  | .                  | .                  | .                  | . |
| .                  | .                  | .                  | .                  | . |
| Vv03g0070          | Tc02_g006210       | .                  | Gorai.             | . |
| 008G032500.1       | .                  | .                  | .                  | . |
| .                  | .                  | .                  | .                  | . |
| Vv03g0071          | Tc02_g006200       | Gorai.005G249200.1 | .                  | . |
| .                  | .                  | .                  | .                  | . |
| .                  | .                  | .                  | .                  | . |
| Vv03g0072          | .                  | Gorai.005G249300.1 | .                  | . |
| Gorai.008G032600.1 | Gorai.012G153800.1 | .                  | .                  | . |
| .                  | .                  | .                  | .                  | . |
| .                  | .                  | .                  | .                  | . |
| Vv03g0073          | Tc02_g006190       | .                  | Gorai.             | . |
| 008G032700.1       | .                  | .                  | .                  | . |
| .                  | Vv04g1287          | Tc01_g001860       | Gorai.007G048500.1 | . |
| .                  | .                  | .                  | .                  | . |
| Vv03g0074          | .                  | .                  | .                  | . |

|                    |              |   |   |                    |   |   |   |
|--------------------|--------------|---|---|--------------------|---|---|---|
| Vv18g1248          | .            | . | . | .                  | . | . | . |
| .                  | .            | . | . | .                  | . | . | . |
| Vv03g0075          | .            | . | . | .                  | . | . | . |
| .                  | .            | . | . | .                  | . | . | . |
| Vv03g0076          | .            | . | . | .                  | . | . | . |
| .                  | .            | . | . | .                  | . | . | . |
| Vv03g0077          | Tc02_g006180 | . | . | .                  | . | . | . |
| .                  | .            | . | . | .                  | . | . | . |
| Vv03g0078          | Tc02_g006170 | . | . | Gorai.005G249400.1 | . | . | . |
| .                  | .            | . | . | .                  | . | . | . |
| Vv03g0079          | Tc02_g006160 | . | . | .                  | . | . | . |
| .                  | .            | . | . | .                  | . | . | . |
| Vv03g0080          | Tc02_g006150 | . | . | .                  | . | . | . |
| .                  | .            | . | . | .                  | . | . | . |
| Vv03g0081          | Tc02_g006140 | . | . | Gorai.005G249700.1 | . | . | . |
| .                  | .            | . | . | .                  | . | . | . |
| Vv03g0082          | Tc02_g006130 | . | . | .                  | . | . | . |
| Gorai.012G153700.1 | .            | . | . | .                  | . | . | . |
| .                  | .            | . | . | .                  | . | . | . |
| Vv03g0083          | Tc02_g006120 | . | . | Gorai.005G249900.1 | . | . | . |
| .                  | .            | . | . | .                  | . | . | . |
| Vv03g0084          | Tc02_g006110 | . | . | .                  | . | . | . |
| Gorai.012G150800.1 | .            | . | . | .                  | . | . | . |
| .                  | .            | . | . | .                  | . | . | . |
| Vv03g0085          | .            | . | . | .                  | . | . | . |
| .                  | .            | . | . | .                  | . | . | . |
| Vv03g0086          | Tc02_g006100 | . | . | .                  | . | . | . |
| .                  | .            | . | . | .                  | . | . | . |
| Vv03g0087          | Tc02_g006090 | . | . | .                  | . | . | . |
| .                  | .            | . | . | .                  | . | . | . |
| Vv03g0088          | Tc02_g006080 | . | . | .                  | . | . | . |
| .                  | .            | . | . | .                  | . | . | . |
| Vv03g0089          | .            | . | . | .                  | . | . | . |
| .                  | .            | . | . | .                  | . | . | . |
| Vv03g0090          | Tc02_g006070 | . | . | Gorai.005G250200.1 | . | . | . |
| .                  | .            | . | . | .                  | . | . | . |
| .                  | .            | . | . | .                  | . | . | . |

|           |              |   |                    |   |   |
|-----------|--------------|---|--------------------|---|---|
| Vv03g0091 | Tc02_g006060 | . | .                  | . | . |
| .         | .            | . | .                  | . | . |
| Vv03g0092 | Tc02_g006050 | . | .                  | . | . |
| .         | .            | . | .                  | . | . |
| Vv03g0093 | Tc02_g006030 | . | Gorai.005G250700.1 | . | . |
| .         | .            | . | .                  | . | . |
| Vv03g0094 | Tc02_g006010 | . | .                  | . | . |
| .         | .            | . | .                  | . | . |
| Vv03g0095 | Tc02_g005990 | . | Gorai.005G250900.1 | . | . |
| .         | .            | . | .                  | . | . |
| Vv03g0096 | Tc02_g005970 | . | Gorai.005G251000.1 | . | . |
| .         | .            | . | .                  | . | . |
| Vv03g0097 | Tc02_g005950 | . | Gorai.005G251100.1 | . | . |
| .         | .            | . | .                  | . | . |
| Vv03g0098 | Tc02_g005930 | . | .                  | . | . |
| .         | .            | . | .                  | . | . |
| Vv03g0099 | Tc02_g005910 | . | Gorai.005G251300.1 | . | . |
| .         | .            | . | .                  | . | . |
| Vv03g0100 | Tc02_g005880 | . | Gorai.005G251400.1 | . | . |
| .         | .            | . | .                  | . | . |
| Vv03g0101 | Tc02_g005860 | . | Gorai.005G251500.1 | . | . |
| .         | .            | . | .                  | . | . |
| Vv03g0102 | Tc02_g005840 | . | Gorai.005G251600.1 | . | . |
| .         | .            | . | .                  | . | . |
| Vv03g0103 | .            | . | .                  | . | . |
| .         | .            | . | .                  | . | . |
| Vv03g0104 | Tc02_g005820 | . | Gorai.005G251700.1 | . | . |
| .         | .            | . | .                  | . | . |
| Vv03g0105 | Tc02_g005800 | . | .                  | . | . |
| .         | .            | . | .                  | . | . |
| Vv03g0106 | .            | . | .                  | . | . |
| Vv18g1256 | Tc08_g003470 | . | .                  | . | . |
| .         | .            | . | .                  | . | . |
| Vv03g0107 | .            | . | .                  | . | . |
| Vv18g1260 | .            | . | Gorai.009G195300.1 | . | . |

|                    |                    |                    |                    |                    |   |   |
|--------------------|--------------------|--------------------|--------------------|--------------------|---|---|
|                    | Gorai.010G005100.1 | .                  | .                  | .                  | . | . |
| Vv03g0108          | .                  | .                  | Gorai.005G251800.1 | .                  | . | . |
| Gorai.008G032900.1 | .                  | .                  | .                  | .                  | . | . |
| .                  | .                  | .                  | .                  | .                  | . | . |
| Vv03g0109          | Tc02_g005740       | .                  | .                  | .                  | . | . |
| .                  | .                  | .                  | .                  | .                  | . | . |
| Vv03g0110          | Tc02_g005730       | .                  | .                  | .                  | . | . |
| .                  | .                  | .                  | .                  | .                  | . | . |
| Vv03g0111          | .                  | .                  | .                  | .                  | . | . |
| .                  | .                  | .                  | .                  | .                  | . | . |
| Vv03g0112          | Tc02_g005660       | .                  | .                  | Gorai.002G006300.1 | . | . |
| Gorai.008G033200.1 | .                  | .                  | .                  | .                  | . | . |
| .                  | .                  | .                  | .                  | .                  | . | . |
| Vv03g0113          | Tc02_g005650       | .                  | Gorai.005G251900.1 | .                  | . | . |
| .                  | .                  | .                  | .                  | .                  | . | . |
| Vv03g0114          | Tc02_g005640       | .                  | .                  | Gorai.002G005700.1 | . | . |
| Gorai.008G033300.1 | .                  | .                  | .                  | .                  | . | . |
| .                  | .                  | .                  | .                  | .                  | . | . |
| Vv03g0115          | Tc02_g005630       | Gorai.002G192600.1 | Gorai.             | .                  | . | . |
| 005G252000.1       | .                  | Gorai.008G033400.1 | Vv18g1275          | .                  | . | . |
| Tc08_g003580       | .                  | .                  | Gorai.             | .                  | . | . |
| 010G004300.1       | .                  | .                  | .                  | .                  | . | . |
| Vv03g0116          | Tc02_g005620       | Gorai.005G252100.1 | .                  | .                  | . | . |
| .                  | Vv18g1276          | Tc08_g003590       | Gorai.             | .                  | . | . |
| 002G123500.1       | .                  | .                  | .                  | .                  | . | . |
| .                  | .                  | .                  | .                  | .                  | . | . |
| Vv03g0117          | Tc02_g005610       | Gorai.002G192700.1 | .                  | .                  | . | . |
| .                  | .                  | .                  | .                  | .                  | . | . |
| Vv03g0118          | .                  | .                  | .                  | .                  | . | . |
| .                  | .                  | .                  | .                  | .                  | . | . |
| Vv03g0119          | .                  | .                  | .                  | .                  | . | . |
| .                  | .                  | .                  | .                  | .                  | . | . |
| Vv03g0120          | .                  | .                  | .                  | .                  | . | . |
| .                  | .                  | .                  | .                  | .                  | . | . |
| Vv03g0121          | .                  | .                  | .                  | .                  | . | . |
| .                  | .                  | .                  | .                  | .                  | . | . |
| Vv03g0122          | .                  | .                  | .                  | .                  | . | . |

|           |   |   |   |   |   |   |   |
|-----------|---|---|---|---|---|---|---|
| .         | . | . | . | . | . | . | . |
| Vv03g0123 | . | . | . | . | . | . | . |
| .         | . | . | . | . | . | . | . |
| Vv03g0124 | . | . | . | . | . | . | . |
| .         | . | . | . | . | . | . | . |
| Vv03g0125 | . | . | . | . | . | . | . |
| .         | . | . | . | . | . | . | . |
| Vv03g0126 | . | . | . | . | . | . | . |
| .         | . | . | . | . | . | . | . |
| Vv03g0127 | . | . | . | . | . | . | . |
| .         | . | . | . | . | . | . | . |
| Vv03g0128 | . | . | . | . | . | . | . |
| .         | . | . | . | . | . | . | . |
| Vv03g0129 | . | . | . | . | . | . | . |
| .         | . | . | . | . | . | . | . |
| Vv03g0130 | . | . | . | . | . | . | . |
| .         | . | . | . | . | . | . | . |
| Vv03g0131 | . | . | . | . | . | . | . |
| .         | . | . | . | . | . | . | . |
| Vv03g0132 | . | . | . | . | . | . | . |
| .         | . | . | . | . | . | . | . |
| Vv03g0133 | . | . | . | . | . | . | . |
| .         | . | . | . | . | . | . | . |
| Vv03g0134 | . | . | . | . | . | . | . |
| .         | . | . | . | . | . | . | . |
| Vv03g0135 | . | . | . | . | . | . | . |
| .         | . | . | . | . | . | . | . |
| Vv03g0136 | . | . | . | . | . | . | . |
| .         | . | . | . | . | . | . | . |
| Vv03g0137 | . | . | . | . | . | . | . |
| .         | . | . | . | . | . | . | . |
| Vv03g0138 | . | . | . | . | . | . | . |
| .         | . | . | . | . | . | . | . |
| .         | . | . | . | . | . | . | . |

|                    |                    |                    |                    |   |        |   |   |
|--------------------|--------------------|--------------------|--------------------|---|--------|---|---|
| Vv03g0139          | .                  | .                  | .                  | . | .      | . | . |
| .                  | .                  | .                  | .                  | . | .      | . | . |
| Vv03g0140          | .                  | .                  | .                  | . | .      | . | . |
| .                  | .                  | .                  | .                  | . | .      | . | . |
| Vv03g0141          | .                  | .                  | .                  | . | .      | . | . |
| .                  | .                  | .                  | .                  | . | .      | . | . |
| Vv03g0142          | Tc02_g005560       |                    | Gorai.002G192900.1 | . | .      | . | . |
| .                  | .                  | .                  | .                  | . | .      | . | . |
| Vv03g0143          | Tc02_g005550       | .                  | Gorai.005G252200.1 | . | .      | . | . |
| .                  | .                  | .                  | .                  | . | .      | . | . |
| Gorai.007G194400.1 | Vv04g1307          |                    | Tc01_g001660       | . | .      | . | . |
| Vv03g0144          | Gorai.003G009400.1 | .                  | .                  | . | .      | . | . |
| .                  | .                  | .                  | .                  | . | .      | . | . |
| Vv03g0145          | Tc02_g005540       | .                  | Gorai.005G252300.1 | . | .      | . | . |
| .                  | .                  | .                  | .                  | . | .      | . | . |
| Vv03g0146          | Tc02_g005530       |                    | Gorai.002G193400.1 |   | Gorai. | . | . |
| 005G252400.1       | Gorai.008G033900.1 | .                  | .                  | . | .      | . | . |
| .                  | .                  | .                  | .                  | . | .      | . | . |
| Vv03g0147          | .                  | .                  | .                  | . | .      | . | . |
| .                  | .                  | .                  | .                  | . | .      | . | . |
| Vv03g0148          | .                  | .                  | .                  | . | .      | . | . |
| .                  | .                  | .                  | .                  | . | .      | . | . |
| Vv03g0149          | .                  | Gorai.002G193500.1 | .                  | . | .      | . | . |
| .                  | .                  | .                  | .                  | . | .      | . | . |
| Vv03g0150          | .                  | .                  | .                  | . | .      | . | . |
| .                  | .                  | .                  | .                  | . | .      | . | . |
| Vv03g0151          | .                  | .                  | .                  | . | .      | . | . |
| .                  | .                  | .                  | .                  | . | .      | . | . |
| Vv03g0152          | Tc02_g005520       | .                  | .                  | . | .      | . | . |
| .                  | .                  | .                  | .                  | . | .      | . | . |
| Vv03g0153          | .                  | .                  | .                  | . | .      | . | . |
| .                  | .                  | .                  | .                  | . | .      | . | . |
| Vv03g0154          | .                  | .                  | .                  | . | .      | . | . |
| .                  | .                  | .                  | .                  | . | .      | . | . |
| .                  | .                  | .                  | .                  | . | .      | . | . |

|                    |                    |                    |                    |   |           |
|--------------------|--------------------|--------------------|--------------------|---|-----------|
| Vv03g0155          | Tc02_g005500       | .                  | .                  | . | Gorai.    |
| 008G034000.1       | .                  | .                  | .                  | . | .         |
| .                  | .                  | .                  | .                  | . | .         |
| Vv03g0156          | Tc02_g005490       | Gorai.002G193600.1 | .                  | . | .         |
| Gorai.002G003800.1 | Gorai.008G034100.1 | .                  | .                  | . | Vv18g1285 |
| .                  | .                  | .                  | .                  | . | .         |
| .                  | .                  | .                  | .                  | . | .         |
| Vv03g0157          | Tc02_g005480       | .                  | Gorai.005G252500.1 | . | .         |
| Gorai.008G034300.1 | .                  | .                  | .                  | . | .         |
| .                  | .                  | .                  | .                  | . | .         |
| .                  | .                  | .                  | .                  | . | .         |
| Vv03g0158          | .                  | .                  | .                  | . | .         |
| .                  | .                  | .                  | .                  | . | .         |
| .                  | .                  | .                  | .                  | . | .         |
| Vv03g0159          | Tc02_g005470       | .                  | Gorai.005G252600.1 | . | .         |
| Gorai.008G034500.1 | Gorai.012G153000.1 | .                  | .                  | . | .         |
| .                  | .                  | .                  | .                  | . | .         |
| .                  | .                  | .                  | .                  | . | .         |
| Vv03g0160          | Tc02_g005460       | Gorai.002G193700.1 | .                  | . | .         |
| .                  | .                  | .                  | .                  | . | .         |
| .                  | .                  | .                  | .                  | . | .         |
| Vv03g0161          | Tc02_g005450       | .                  | .                  | . | .         |
| .                  | .                  | .                  | .                  | . | .         |
| .                  | .                  | .                  | .                  | . | .         |
| Vv03g0162          | Tc02_g005440       | Gorai.002G193800.1 | .                  | . | .         |
| .                  | .                  | .                  | .                  | . | .         |
| .                  | .                  | .                  | .                  | . | .         |
| Vv03g0163          | Tc02_g005430       | .                  | .                  | . | .         |
| .                  | .                  | .                  | .                  | . | .         |
| .                  | .                  | .                  | .                  | . | .         |
| Vv03g0164          | Tc02_g005420       | Gorai.002G193900.1 | .                  | . | .         |
| .                  | .                  | .                  | .                  | . | .         |
| .                  | .                  | .                  | .                  | . | .         |
| Vv03g0165          | .                  | .                  | .                  | . | .         |
| .                  | .                  | .                  | .                  | . | .         |
| .                  | .                  | .                  | .                  | . | .         |
| Vv03g0166          | .                  | .                  | .                  | . | .         |
| .                  | .                  | .                  | .                  | . | .         |
| .                  | .                  | .                  | .                  | . | .         |
| Vv03g0167          | .                  | Gorai.002G194000.1 | .                  | . | .         |
| .                  | .                  | .                  | .                  | . | .         |
| .                  | .                  | .                  | .                  | . | .         |
| Vv03g0168          | .                  | Gorai.002G193900.1 | .                  | . | .         |
| .                  | .                  | .                  | .                  | . | .         |
| .                  | .                  | .                  | .                  | . | .         |
| Vv03g0169          | .                  | Gorai.002G193800.1 | .                  | . | .         |
| .                  | .                  | .                  | .                  | . | .         |
| .                  | .                  | .                  | .                  | . | .         |
| Vv03g0170          | Tc02_g005320       | Gorai.002G194900.1 | .                  | . | .         |
| .                  | .                  | .                  | .                  | . | .         |



|                    |                    |                    |   |                    |   |                    |   |
|--------------------|--------------------|--------------------|---|--------------------|---|--------------------|---|
| Vv03g0171          | .                  | .                  | . | .                  | . | .                  | . |
| .                  | .                  | .                  | . | .                  | . | .                  | . |
| Vv03g0172          | Tc02_g005290       | .                  | . | .                  | . | Gorai.             | . |
| 008G034600.1       | .                  | .                  | . | .                  | . | .                  | . |
| Vv03g0173          | Tc02_g005280       | .                  | . | Gorai.005G252900.1 | . | .                  | . |
| .                  | .                  | .                  | . | .                  | . | .                  | . |
| Vv03g0174          | Tc02_g005270       | .                  | . | Gorai.005G253000.1 | . | .                  | . |
| Gorai.008G034800.1 | .                  | .                  | . | .                  | . | .                  | . |
| .                  | .                  | .                  | . | .                  | . | .                  | . |
| Vv03g0175          | Tc02_g005260       | .                  | . | .                  | . | Gorai.             | . |
| 008G034900.1       | .                  | .                  | . | .                  | . | .                  | . |
| Vv03g0176          | .                  | .                  | . | .                  | . | .                  | . |
| .                  | .                  | .                  | . | .                  | . | .                  | . |
| Vv03g0177          | Tc02_g005250       | .                  | . | Gorai.005G253100.1 | . | .                  | . |
| .                  | .                  | .                  | . | .                  | . | .                  | . |
| Vv03g0178          | Tc02_g005240       | .                  | . | .                  | . | Gorai.002G003600.1 | . |
| Gorai.008G035100.1 | .                  | .                  | . | Vv04g1310          | . | .                  | . |
| Tc01_g001620       | Gorai.007G048700.1 | .                  | . | Gorai.008G062700.1 | . | .                  | . |
| Gorai.007G193900.1 | .                  | .                  | . | .                  | . | .                  | . |
| Vv03g0179          | .                  | Gorai.002G195100.1 | . | Gorai.005G253200.1 | . | .                  | . |
| Gorai.002G003500.1 | .                  | .                  | . | Vv04g1313          | . | .                  | . |
| .                  | Gorai.008G062500.1 | .                  | . | Gorai.007G193700.1 | . | .                  | . |
| .                  | .                  | .                  | . | .                  | . | .                  | . |
| Vv03g0180          | Tc02_g005220       | Gorai.002G195200.1 | . | Gorai.             | . | .                  | . |
| 005G253300.1       | .                  | .                  | . | .                  | . | .                  | . |
| .                  | .                  | .                  | . | .                  | . | .                  | . |
| Vv03g0181          | Tc02_g005210       | Gorai.002G195300.1 | . | .                  | . | .                  | . |
| .                  | Vv18g1256          | Tc08_g003470       | . | .                  | . | .                  | . |
| .                  | .                  | .                  | . | .                  | . | .                  | . |
| Vv03g0182          | .                  | .                  | . | .                  | . | .                  | . |
| .                  | .                  | .                  | . | .                  | . | .                  | . |
| Vv03g0183          | .                  | .                  | . | .                  | . | .                  | . |
| .                  | .                  | .                  | . | .                  | . | .                  | . |
| Vv03g0184          | .                  | .                  | . | .                  | . | .                  | . |
| .                  | .                  | .                  | . | .                  | . | .                  | . |
| Vv03g0185          | .                  | .                  | . | .                  | . | .                  | . |

|                    |                    |                    |                    |        |   |   |
|--------------------|--------------------|--------------------|--------------------|--------|---|---|
| .                  | .                  | .                  | .                  | .      | . | . |
| .                  | .                  | .                  | .                  | .      | . | . |
| Vv03g0186          | Tc02_g005180       | Gorai.002G195600.1 | .                  | .      | . | . |
| .                  | .                  | .                  | .                  | .      | . | . |
| .                  | .                  | .                  | .                  | .      | . | . |
| Vv03g0187          | Tc02_g005170       | Gorai.002G195700.1 | Gorai.             | .      | . | . |
| 005G253600.1       | .                  | .                  | .                  | .      | . | . |
| .                  | .                  | .                  | .                  | .      | . | . |
| .                  | .                  | .                  | .                  | .      | . | . |
| Vv03g0188          | .                  | Gorai.002G193600.1 | .                  | Gorai. | . | . |
| 002G003400.1       | .                  | Gorai.012G153200.1 | Vv18g1285          | .      | . | . |
| .                  | .                  | .                  | .                  | .      | . | . |
| .                  | .                  | .                  | .                  | .      | . | . |
| Vv03g0189          | .                  | Gorai.002G195800.1 | .                  | .      | . | . |
| .                  | .                  | .                  | .                  | .      | . | . |
| .                  | .                  | .                  | .                  | .      | . | . |
| Vv03g0190          | Tc02_g005140       | Gorai.002G195900.1 | Gorai.             | .      | . | . |
| 005G253800.1       | .                  | Gorai.008G035300.1 | .                  | .      | . | . |
| .                  | .                  | .                  | .                  | .      | . | . |
| .                  | .                  | .                  | .                  | .      | . | . |
| Vv03g0191          | Tc02_g005130       | .                  | .                  | .      | . | . |
| .                  | .                  | .                  | .                  | .      | . | . |
| .                  | .                  | .                  | .                  | .      | . | . |
| Vv03g0192          | .                  | .                  | .                  | .      | . | . |
| .                  | .                  | .                  | .                  | .      | . | . |
| .                  | .                  | .                  | .                  | .      | . | . |
| Vv03g0193          | Tc02_g005120       | .                  | .                  | .      | . | . |
| .                  | .                  | .                  | .                  | .      | . | . |
| .                  | .                  | .                  | .                  | .      | . | . |
| Vv03g0194          | Tc02_g005110       | .                  | .                  | Gorai. | . | . |
| 008G035600.1       | .                  | .                  | .                  | .      | . | . |
| .                  | Vv04g1329          | Tc01_g001480       | .                  | .      | . | . |
| .                  | Gorai.003G008500.1 | .                  | .                  | .      | . | . |
| Vv03g0195          | Tc02_g005100       | Gorai.002G196200.1 | .                  | .      | . | . |
| .                  | .                  | .                  | .                  | .      | . | . |
| .                  | .                  | .                  | .                  | .      | . | . |
| Vv03g0196          | Tc02_g005090       | .                  | Gorai.005G253900.1 | .      | . | . |
| .                  | .                  | .                  | .                  | .      | . | . |
| .                  | Vv04g1331          | Tc01_g001460       | .                  | .      | . | . |
| Gorai.007G193100.1 | Gorai.003G008300.1 | .                  | .                  | .      | . | . |
| Vv03g0197          | Tc02_g005080       | Gorai.002G196700.1 | Gorai.             | .      | . | . |
| 005G254000.1       | .                  | Gorai.008G035700.1 | .                  | .      | . | . |
| .                  | .                  | .                  | .                  | .      | . | . |
| .                  | .                  | .                  | .                  | .      | . | . |
| Vv03g0198          | Tc02_g005070       | Gorai.002G196800.1 | Gorai.             | .      | . | . |
| 005G254100.1       | .                  | .                  | .                  | .      | . | . |
| .                  | .                  | .                  | .                  | .      | . | . |
| .                  | .                  | .                  | .                  | .      | . | . |
| Vv03g0199          | Tc02_g005060       | Gorai.002G191600.1 | .                  | .      | . | . |
| Gorai.002G003300.1 | .                  | .                  | .                  | .      | . | . |

|                    |                                                 |                                          |                              |   |
|--------------------|-------------------------------------------------|------------------------------------------|------------------------------|---|
| Vv03g0200          | Tc02_g005050<br>Gorai.008G035900.1              | Gorai.002G188800.1<br>Vv04g1348          | .                            | . |
| Vv03g0201          | .                                               | Gorai.002G003200.1                       | .                            | . |
| Vv03g0202          | Tc02_g005040<br>Gorai.008G036000.1              | Gorai.002G197200.1<br>Vv04g1351          | .                            | . |
| Vv03g0203          | Tc02_g005030                                    | Gorai.002G197400.1                       | .                            | . |
| Vv03g0204          | Tc02_g005020<br>Gorai.008G036100.1              | Gorai.002G197500.1<br>Vv18g1312          | .                            | . |
| Tc08_g003890       | Gorai.005G112500.1                              | Gorai.009G193300.1                       | .                            | . |
| Gorai.003G008000.1 | Gorai.009G269600.1<br>Tc01_g001350              | Gorai.010G002600.1<br>Gorai.007G192300.1 | Vv04g1352                    | . |
| Vv03g0205          | Tc02_g005010<br>Gorai.008G036200.1              | Gorai.002G197600.1                       | .                            | . |
| Vv03g0206          | Tc02_g005000<br>Gorai.008G036300.1              | Gorai.002G197700.1                       | .                            | . |
| Vv03g0207          | Tc02_g004980<br>005G254200.1 Gorai.002G003000.1 | Gorai.002G197800.1                       | Gorai.                       | . |
| Vv03g0208          | Tc02_g004970                                    | Gorai.002G002900.1                       | .                            | . |
| Vv03g0209          | Tc02_g004960<br>Vv04g1356<br>Gorai.003G007800.1 | Gorai.002G198000.1<br>Tc01_g001320       | .                            | . |
| Vv03g0210          | Tc02_g004940<br>005G254300.1 Gorai.002G002800.1 | Gorai.002G198200.1                       | Gorai.                       | . |
| Vv03g0211          | Tc08_g003950<br>Gorai.009G192800.1              | Gorai.002G122300.1<br>Gorai.009G269400.1 | Gorai.005G112600.1<br>Gorai. | . |
| Vv03g0212          | Tc02_g004930                                    | Gorai.002G198300.1                       | .                            | . |
|                    | Gorai.002G198400.1                              |                                          | .                            | . |

|                    |                    |                    |                    |        |   |
|--------------------|--------------------|--------------------|--------------------|--------|---|
| .                  | Vv18g1332          | .                  | .                  | .      | . |
| .                  | .                  | .                  | .                  | .      | . |
| Vv03g0213          | .                  | .                  | Gorai.002G002700.1 | .      | . |
| Gorai.008G036400.1 | .                  | .                  | .                  | .      | . |
| .                  | .                  | .                  | .                  | .      | . |
| .                  | .                  | .                  | .                  | .      | . |
| Vv03g0214          | .                  | .                  | .                  | .      | . |
| Vv18g1335          | Tc08_g003990       | .                  | .                  | .      | . |
| Gorai.010G002100.1 | .                  | .                  | .                  | .      | . |
| .                  | .                  | .                  | .                  | .      | . |
| Vv03g0215          | .                  | .                  | .                  | .      | . |
| .                  | .                  | .                  | .                  | .      | . |
| .                  | .                  | .                  | .                  | .      | . |
| Vv03g0216          | .                  | .                  | .                  | .      | . |
| .                  | .                  | .                  | .                  | .      | . |
| .                  | .                  | .                  | .                  | .      | . |
| Vv03g0217          | Tc02_g004900       | .                  | .                  | Gorai. | . |
| 008G036500.1       | .                  | .                  | .                  | .      | . |
| .                  | .                  | .                  | .                  | .      | . |
| Vv03g0218          | .                  | .                  | Gorai.002G002600.1 | .      | . |
| Gorai.008G036700.1 | .                  | .                  | .                  | .      | . |
| .                  | .                  | .                  | .                  | .      | . |
| .                  | .                  | .                  | .                  | .      | . |
| Vv03g0219          | Tc02_g004890       | Gorai.002G198600.1 | .                  | .      | . |
| .                  | .                  | .                  | .                  | .      | . |
| .                  | .                  | .                  | .                  | .      | . |
| Vv03g0220          | Tc02_g004830       | Gorai.002G198900.1 | Gorai.             | .      | . |
| 005G254400.1       | Gorai.002G002500.1 | .                  | .                  | .      | . |
| .                  | .                  | .                  | .                  | .      | . |
| .                  | .                  | .                  | .                  | .      | . |
| Vv03g0221          | Tc02_g004810       | Gorai.002G199000.1 | .                  | .      | . |
| .                  | Gorai.012G156000.1 | .                  | .                  | .      | . |
| .                  | .                  | .                  | .                  | .      | . |
| .                  | .                  | .                  | .                  | .      | . |
| Vv03g0222          | Tc02_g004790       | .                  | .                  | Gorai. | . |
| 008G036900.1       | .                  | .                  | .                  | .      | . |
| .                  | .                  | .                  | .                  | .      | . |
| .                  | .                  | .                  | .                  | .      | . |
| Vv03g0223          | Tc02_g004780       | Gorai.002G199100.1 | .                  | .      | . |
| .                  | .                  | .                  | .                  | .      | . |
| .                  | .                  | .                  | .                  | .      | . |
| .                  | .                  | .                  | .                  | .      | . |
| Vv03g0224          | Tc02_g004770       | .                  | Gorai.005G254600.1 | .      | . |
| Gorai.002G002400.1 | .                  | .                  | .                  | .      | . |
| .                  | .                  | .                  | .                  | .      | . |
| .                  | .                  | .                  | .                  | .      | . |
| Vv03g0225          | .                  | .                  | .                  | .      | . |
| .                  | .                  | .                  | .                  | .      | . |
| .                  | .                  | .                  | .                  | .      | . |
| .                  | .                  | .                  | .                  | .      | . |
| Vv03g0226          | Tc02_g004760       | .                  | .                  | .      | . |
| Gorai.012G156100.1 | .                  | .                  | .                  | .      | . |
| .                  | .                  | .                  | .                  | .      | . |
| .                  | .                  | .                  | .                  | .      | . |

|                    |                    |                    |                    |        |
|--------------------|--------------------|--------------------|--------------------|--------|
| Vv03g0227          | Tc02_g004750       | .                  | Gorai.005G254700.1 | .      |
| .                  | .                  | .                  | .                  | .      |
| Vv03g0228          | Tc02_g004740       | Gorai.002G199200.1 | .                  | .      |
|                    | Gorai.008G037000.1 | .                  | Vv18g0209          | .      |
| Tc08_g004080       | .                  | .                  | .                  | .      |
| .                  | .                  | .                  | .                  | .      |
| Vv03g0229          | .                  | Gorai.002G199300.1 | .                  | .      |
| .                  | Vv18g0208          | .                  | .                  | .      |
| .                  | .                  | .                  | .                  | .      |
| Vv03g0230          | Tc02_g004730       | Gorai.002G199400.1 | .                  | .      |
| .                  | Gorai.012G156400.1 | .                  | .                  | .      |
| .                  | .                  | .                  | .                  | .      |
| .                  | .                  | .                  | .                  | .      |
| Vv03g0231          | .                  | Gorai.002G199500.1 | .                  | .      |
|                    | Gorai.012G156500.1 | .                  | .                  | .      |
| .                  | .                  | .                  | .                  | .      |
| .                  | .                  | .                  | .                  | .      |
| Vv03g0232          | Tc02_g004720       | .                  | Gorai.005G254800.1 | .      |
| Gorai.002G002300.1 | .                  | .                  | .                  | .      |
| .                  | .                  | .                  | .                  | .      |
| .                  | .                  | .                  | .                  | .      |
| Vv03g0233          | Tc02_g004670       | .                  | Gorai.005G254900.1 | .      |
| .                  | .                  | .                  | .                  | .      |
| .                  | .                  | .                  | .                  | .      |
| Vv03g0234          | Tc02_g004640       | Gorai.002G199700.1 | Gorai.             | .      |
| 005G255000.1       | .                  | Gorai.008G037200.1 | Gorai.012G156600.1 | .      |
| .                  | .                  | .                  | .                  | .      |
| .                  | .                  | .                  | .                  | .      |
| Vv03g0235          | Tc02_g004630       | Gorai.002G199800.1 | .                  | .      |
| .                  | .                  | .                  | .                  | .      |
| .                  | .                  | .                  | .                  | .      |
| Vv03g0236          | Tc02_g004620       | Gorai.002G199900.1 | .                  | .      |
|                    | Gorai.008G037300.1 | .                  | .                  | .      |
| .                  | .                  | .                  | .                  | .      |
| .                  | .                  | .                  | .                  | .      |
| Vv03g0237          | Tc02_g004610       | .                  | .                  | Gorai. |
| 008G037400.1       | .                  | .                  | .                  | .      |
| .                  | .                  | .                  | .                  | .      |
| Vv03g0238          | .                  | .                  | .                  | .      |
| .                  | .                  | .                  | .                  | .      |
| .                  | .                  | .                  | .                  | .      |
| Vv03g0239          | .                  | .                  | .                  | .      |
| .                  | .                  | .                  | .                  | .      |
| .                  | .                  | .                  | .                  | .      |
| Vv03g0240          | .                  | .                  | .                  | .      |
| .                  | .                  | .                  | .                  | .      |
| .                  | .                  | .                  | .                  | .      |
| Vv03g0241          | .                  | .                  | .                  | .      |
| .                  | .                  | .                  | .                  | .      |

|                    |                    |                    |           |   |   |   |   |
|--------------------|--------------------|--------------------|-----------|---|---|---|---|
| Vv03g0242          | .                  | .                  | .         | . | . | . | . |
| .                  | .                  | .                  | .         | . | . | . | . |
| Vv03g0243          | .                  | .                  | .         | . | . | . | . |
| .                  | .                  | .                  | .         | . | . | . | . |
| Vv03g0244          | .                  | .                  | .         | . | . | . | . |
| .                  | .                  | .                  | .         | . | . | . | . |
| Vv03g0245          | .                  | .                  | .         | . | . | . | . |
| Vv18g0199          | Tc08_g004150       | Gorai.002G121100.1 | .         | . | . | . | . |
|                    | Gorai.009G269100.1 | .                  | .         | . | . | . | . |
| .                  | .                  | .                  | .         | . | . | . | . |
| Vv03g0246          | .                  | .                  | .         | . | . | . | . |
| .                  | .                  | .                  | .         | . | . | . | . |
| Vv03g0247          | .                  | .                  | .         | . | . | . | . |
| .                  | .                  | .                  | .         | . | . | . | . |
| Vv03g0248          | .                  | .                  | .         | . | . | . | . |
| .                  | .                  | .                  | .         | . | . | . | . |
| Vv03g0249          | .                  | .                  | .         | . | . | . | . |
| .                  | .                  | .                  | .         | . | . | . | . |
| Vv03g0250          | .                  | .                  | .         | . | . | . | . |
| .                  | .                  | .                  | .         | . | . | . | . |
| Vv03g0251          | Tc02_g004600       | Gorai.002G200000.1 | .         | . | . | . | . |
|                    | Gorai.008G037500.1 | .                  | .         | . | . | . | . |
| .                  | .                  | .                  | .         | . | . | . | . |
| Vv03g0252          | Tc02_g004550       | Gorai.002G200500.1 | Gorai.    | . | . | . | . |
| 005G255100.1       | Gorai.002G002200.1 | .                  | Vv18g0194 | . | . | . | . |
|                    | Tc08_g004200       | .                  | .         | . | . | . | . |
| .                  | .                  | .                  | .         | . | . | . | . |
| Vv03g0253          | Tc02_g004540       | Gorai.005G255200.1 | .         | . | . | . | . |
| .                  | .                  | .                  | .         | . | . | . | . |
| Vv03g0254          | .                  | .                  | .         | . | . | . | . |
| .                  | .                  | .                  | .         | . | . | . | . |
| Vv03g0255          | Tc02_g004530       | .                  | .         | . | . | . | . |
| Gorai.012G156700.1 | .                  | .                  | .         | . | . | . | . |
| .                  | .                  | .                  | .         | . | . | . | . |
| Vv03g0256          | Tc02_g004510       | .                  | .         | . | . | . | . |
| .                  | .                  | .                  | .         | . | . | . | . |
| .                  | .                  | .                  | .         | . | . | . | . |
| Vv03g0257          | .                  | .                  | .         | . | . | . | . |

|              |                    |                    |   |   |                    |   |   |
|--------------|--------------------|--------------------|---|---|--------------------|---|---|
| .            | .                  | .                  | . | . | .                  | . | . |
| .            | .                  | .                  | . | . | .                  | . | . |
| Vv03g0258    | .                  | .                  | . | . | .                  | . | . |
| .            | .                  | .                  | . | . | .                  | . | . |
| .            | .                  | .                  | . | . | .                  | . | . |
| Vv03g0259    | .                  | .                  | . | . | .                  | . | . |
| Vv18g0184    | Tc08_g004260       | .                  | . | . | Gorai.009G191000.1 | . | . |
|              | Gorai.009G268600.1 | .                  | . | . | .                  | . | . |
| .            | .                  | .                  | . | . | .                  | . | . |
| Vv03g0260    | Tc02_g004390       | Gorai.002G200900.1 | . | . | Gorai.             | . | . |
| 005G255500.1 | .                  | Gorai.008G037600.1 | . | . | Vv18g0183          | . | . |
|              | Tc08_g004270       | Gorai.002G120900.1 | . | . | Gorai.             | . | . |
| 009G190900.1 | .                  | .                  | . | . | .                  | . | . |
| .            | .                  | .                  | . | . | .                  | . | . |
| Vv03g0261    | .                  | .                  | . | . | Gorai.             | . | . |
| 012G156900.1 | .                  | .                  | . | . | .                  | . | . |
| .            | .                  | .                  | . | . | .                  | . | . |
| Vv03g0262    | .                  | .                  | . | . | .                  | . | . |
| .            | .                  | .                  | . | . | .                  | . | . |
| .            | .                  | .                  | . | . | .                  | . | . |
| Vv03g0263    | .                  | .                  | . | . | .                  | . | . |
| .            | .                  | .                  | . | . | .                  | . | . |
| .            | .                  | .                  | . | . | .                  | . | . |
| Vv03g0264    | Tc02_g004370       | .                  | . | . | Gorai.             | . | . |
| 008G037700.1 | .                  | .                  | . | . | .                  | . | . |
| .            | .                  | .                  | . | . | .                  | . | . |
| Vv03g0265    | Tc02_g004360       | .                  | . | . | Gorai.             | . | . |
| 008G037800.1 | .                  | .                  | . | . | .                  | . | . |
| .            | .                  | .                  | . | . | .                  | . | . |
| Vv03g0266    | Tc02_g004350       | .                  | . | . | .                  | . | . |
| .            | .                  | .                  | . | . | .                  | . | . |
| .            | .                  | .                  | . | . | .                  | . | . |
| Vv03g0267    | .                  | Gorai.005G255600.1 | . | . | .                  | . | . |
| .            | .                  | .                  | . | . | .                  | . | . |
| .            | .                  | .                  | . | . | .                  | . | . |
| Vv03g0268    | Tc02_g004340       | .                  | . | . | Gorai.             | . | . |
| 008G037900.1 | .                  | .                  | . | . | .                  | . | . |
| .            | .                  | .                  | . | . | .                  | . | . |
| Vv03g0269    | .                  | Gorai.002G201100.1 | . | . | .                  | . | . |
| .            | .                  | .                  | . | . | .                  | . | . |
| .            | .                  | .                  | . | . | .                  | . | . |
| Vv03g0270    | .                  | .                  | . | . | .                  | . | . |
| .            | .                  | .                  | . | . | .                  | . | . |
| .            | .                  | .                  | . | . | .                  | . | . |
| Vv03g0271    | .                  | .                  | . | . | .                  | . | . |
| .            | .                  | .                  | . | . | .                  | . | . |
| .            | .                  | .                  | . | . | .                  | . | . |
| Vv03g0272    | Tc02_g004330       | .                  | . | . | .                  | . | . |
|              | Vv18g0174          | Tc08_g004330       | . | . | Gorai.             | . | . |
| 009G190500.1 | .                  | .                  | . | . | .                  | . | . |

|                    |                    |                    |                    |   |
|--------------------|--------------------|--------------------|--------------------|---|
| Vv03g0273          | Tc02_g004320       | Gorai.002G201200.1 | .                  | . |
| Gorai.002G002100.1 | .                  | Gorai.012G157000.1 | .                  | . |
| .                  | .                  | .                  | .                  | . |
| .                  | .                  | .                  | .                  | . |
| Vv03g0274          | Tc02_g004300       | .                  | Gorai.             | . |
| 008G038000.1       | .                  | .                  | .                  | . |
| .                  | .                  | .                  | .                  | . |
| Vv03g0275          | Tc02_g004290       | Gorai.002G201300.1 | .                  | . |
| .                  | .                  | .                  | .                  | . |
| .                  | .                  | .                  | .                  | . |
| Vv03g0276          | .                  | .                  | .                  | . |
| .                  | .                  | .                  | .                  | . |
| .                  | .                  | .                  | .                  | . |
| Vv03g0277          | Tc02_g004280       | .                  | Gorai.             | . |
| 008G038100.1       | Gorai.012G157100.1 | .                  | .                  | . |
| .                  | .                  | .                  | .                  | . |
| .                  | .                  | .                  | .                  | . |
| Vv03g0278          | .                  | .                  | Gorai.008G038200.1 | . |
| Gorai.012G157300.1 | .                  | .                  | .                  | . |
| .                  | .                  | .                  | .                  | . |
| .                  | .                  | .                  | .                  | . |
| Vv03g0279          | Tc02_g004270       | Gorai.002G201600.1 | .                  | . |
| .                  | .                  | .                  | .                  | . |
| .                  | .                  | .                  | .                  | . |
| Vv03g0280          | .                  | .                  | .                  | . |
| .                  | .                  | .                  | .                  | . |
| .                  | .                  | .                  | .                  | . |
| Vv03g0281          | .                  | .                  | .                  | . |
| .                  | .                  | .                  | .                  | . |
| .                  | .                  | .                  | .                  | . |
| Vv03g0282          | .                  | .                  | .                  | . |
| .                  | .                  | .                  | .                  | . |
| .                  | .                  | .                  | .                  | . |
| Vv03g0283          | .                  | .                  | .                  | . |
| .                  | .                  | .                  | .                  | . |
| .                  | .                  | .                  | .                  | . |
| Vv03g0284          | .                  | .                  | .                  | . |
| .                  | .                  | .                  | .                  | . |
| .                  | .                  | .                  | .                  | . |
| Vv03g0285          | .                  | .                  | .                  | . |
| .                  | .                  | .                  | .                  | . |
| .                  | .                  | .                  | .                  | . |
| Vv03g0286          | .                  | .                  | .                  | . |
| .                  | .                  | .                  | .                  | . |
| .                  | .                  | .                  | .                  | . |
| Vv03g0287          | .                  | .                  | .                  | . |
| .                  | .                  | .                  | .                  | . |
| .                  | .                  | .                  | .                  | . |
| Vv03g0288          | .                  | .                  | .                  | . |



|                    |                    |                    |   |   |   |        |   |   |
|--------------------|--------------------|--------------------|---|---|---|--------|---|---|
| Vv03g0289          | .                  | .                  | . | . | . | .      | . | . |
| Vv03g0290          | .                  | .                  | . | . | . | .      | . | . |
| Vv03g0291          | .                  | .                  | . | . | . | .      | . | . |
| Vv03g0292          | .                  | .                  | . | . | . | .      | . | . |
| Vv03g0293          | .                  | .                  | . | . | . | .      | . | . |
| Vv03g0294          | .                  | .                  | . | . | . | .      | . | . |
| Vv03g0295          | .                  | .                  | . | . | . | .      | . | . |
| Vv03g0296          | .                  | .                  | . | . | . | .      | . | . |
| Vv03g0297          | .                  | .                  | . | . | . | .      | . | . |
| Vv03g0298          | .                  | .                  | . | . | . | .      | . | . |
| Vv03g0299          | .                  | .                  | . | . | . | .      | . | . |
| Vv03g0300          | .                  | .                  | . | . | . | .      | . | . |
| Vv03g0301          | Tc02_g012340       | .                  | . | . | . | .      | . | . |
| Vv03g0302          | .                  | Gorai.002G203900.1 | . | . | . | Gorai. | . | . |
| 002G001800.1       | Gorai.008G039200.1 | .                  | . | . | . | .      | . | . |
| Vv03g0303          | .                  | Gorai.002G204000.1 | . | . | . | .      | . | . |
| Gorai.008G039300.1 | .                  | .                  | . | . | . | .      | . | . |
| Vv03g0304          | .                  | Gorai.002G204100.1 | . | . | . | .      | . | . |

|                    |              |                    |   |   |   |   |
|--------------------|--------------|--------------------|---|---|---|---|
| Gorai.008G039400.1 | .            | .                  | . | . | . | . |
| .                  | .            | .                  | . | . | . | . |
| .                  | .            | .                  | . | . | . | . |
| Vv03g0305          | .            | Gorai.002G204200.1 | . | . | . | . |
| Gorai.008G039500.1 | .            | .                  | . | . | . | . |
| .                  | .            | .                  | . | . | . | . |
| .                  | .            | .                  | . | . | . | . |
| Vv03g0306          | .            | Gorai.002G204400.1 | . | . | . | . |
| Gorai.008G039600.1 | .            | .                  | . | . | . | . |
| .                  | .            | .                  | . | . | . | . |
| .                  | .            | .                  | . | . | . | . |
| Vv03g0307          | .            | Gorai.002G204500.1 | . | . | . | . |
| Gorai.008G039700.1 | .            | Gorai.012G157900.1 | . | . | . | . |
| .                  | .            | .                  | . | . | . | . |
| .                  | .            | .                  | . | . | . | . |
| Vv03g0308          | .            | Gorai.002G204700.1 | . | . | . | . |
| Gorai.008G039800.1 | .            | Gorai.012G158100.1 | . | . | . | . |
| .                  | .            | .                  | . | . | . | . |
| .                  | .            | .                  | . | . | . | . |
| Vv03g0309          | .            | .                  | . | . | . | . |
| .                  | .            | .                  | . | . | . | . |
| .                  | .            | .                  | . | . | . | . |
| Vv03g0310          | Tc02_g012230 | .                  | . | . | . | . |
| .                  | .            | .                  | . | . | . | . |
| .                  | .            | .                  | . | . | . | . |
| Vv03g0311          | .            | .                  | . | . | . | . |
| Vv18g0139          | Tc08_g004660 | Gorai.002G119100.1 | . | . | . | . |
| Gorai.009G188900.1 | .            | .                  | . | . | . | . |
| .                  | .            | .                  | . | . | . | . |
| Vv03g0312          | .            | .                  | . | . | . | . |
| .                  | .            | .                  | . | . | . | . |
| .                  | .            | .                  | . | . | . | . |
| Vv03g0313          | .            | .                  | . | . | . | . |
| .                  | .            | .                  | . | . | . | . |
| .                  | .            | .                  | . | . | . | . |
| Vv03g0314          | Tc02_g004110 | .                  | . | . | . | . |
| .                  | .            | .                  | . | . | . | . |
| .                  | .            | .                  | . | . | . | . |
| Vv03g0315          | Tc02_g004100 | Gorai.005G256400.1 | . | . | . | . |
| .                  | .            | .                  | . | . | . | . |
| .                  | .            | .                  | . | . | . | . |
| Vv03g0316          | Tc02_g004090 | Gorai.005G256500.1 | . | . | . | . |
| .                  | .            | .                  | . | . | . | . |
| .                  | .            | .                  | . | . | . | . |
| Vv03g0317          | Tc02_g004080 | Gorai.005G256600.1 | . | . | . | . |
| .                  | .            | .                  | . | . | . | . |
| .                  | .            | .                  | . | . | . | . |
| Vv03g0318          | Tc02_g004070 | Gorai.005G256700.1 | . | . | . | . |
| .                  | .            | .                  | . | . | . | . |
| .                  | .            | .                  | . | . | . | . |

|           |              |   |                    |   |
|-----------|--------------|---|--------------------|---|
| Vv03g0319 | Tc02_g004060 | . | Gorai.005G256800.1 | . |
| .         | .            | . | .                  | . |
| Vv03g0320 | Tc02_g004050 | . | Gorai.005G256900.1 | . |
| .         | .            | . | .                  | . |
| Vv03g0321 | Tc02_g004040 | . | Gorai.005G257000.1 | . |
| .         | .            | . | .                  | . |
| Vv03g0322 | Tc02_g004030 | . | .                  | . |
| .         | .            | . | .                  | . |
| Vv03g0323 | Tc02_g004020 | . | Gorai.005G257100.1 | . |
| .         | .            | . | .                  | . |
| Vv03g0324 | Tc02_g004010 | . | Gorai.005G257200.1 | . |
| .         | .            | . | .                  | . |
| Vv03g0325 | Tc02_g004000 | . | .                  | . |
| .         | .            | . | .                  | . |
| Vv03g0326 | .            | . | .                  | . |
| .         | .            | . | .                  | . |
| Vv03g0327 | .            | . | .                  | . |
| .         | .            | . | .                  | . |
| Vv03g0328 | .            | . | .                  | . |
| .         | .            | . | .                  | . |
| Vv03g0329 | .            | . | .                  | . |
| .         | .            | . | .                  | . |
| Vv03g0330 | .            | . | .                  | . |
| .         | .            | . | .                  | . |
| Vv03g0331 | .            | . | .                  | . |
| .         | .            | . | .                  | . |
| Vv03g0332 | .            | . | .                  | . |
| .         | .            | . | .                  | . |
| Vv03g0333 | Tc02_g012160 | . | .                  | . |
| .         | .            | . | .                  | . |
| Vv03g0334 | Tc02_g011820 | . | .                  | . |
| .         | .            | . | .                  | . |
| Vv03g0335 | Tc02_g011820 | . | .                  | . |
| .         | .            | . | .                  | . |

|                    |                    |                    |   |                    |        |
|--------------------|--------------------|--------------------|---|--------------------|--------|
| Vv03g0336          | Tc02_g012140       | .                  | . | .                  | .      |
| .                  | .                  | .                  | . | .                  | .      |
| Vv03g0337          | .                  | .                  | . | .                  | .      |
| .                  | .                  | .                  | . | .                  | .      |
| Vv03g0338          | .                  | .                  | . | .                  | .      |
| .                  | .                  | .                  | . | .                  | .      |
| Vv03g0339          | .                  | .                  | . | .                  | .      |
| .                  | .                  | .                  | . | .                  | .      |
| Vv03g0340          | Tc02_g003620       | .                  | . | .                  | Gorai. |
| 008G040700.1       | .                  | .                  | . | .                  | .      |
| .                  | .                  | .                  | . | .                  | .      |
| Vv03g0341          | .                  | .                  | . | .                  | .      |
| Vv18g0108          | Tc08_g004950       | Gorai.002G116800.1 | . | .                  | Gorai. |
| 005G113900.1       | Gorai.009G187800.1 | .                  | . | .                  | .      |
| .                  | .                  | .                  | . | .                  | .      |
| Vv03g0342          | .                  | .                  | . | .                  | .      |
| .                  | .                  | .                  | . | .                  | .      |
| Vv03g0343          | .                  | .                  | . | .                  | .      |
| .                  | .                  | .                  | . | .                  | .      |
| Vv03g0344          | Tc02_g003540       | .                  | . | .                  | .      |
| .                  | .                  | .                  | . | .                  | .      |
| .                  | .                  | .                  | . | .                  | .      |
| Vv03g0345          | .                  | Gorai.002G205800.1 | . | Gorai.005G258600.1 | .      |
| Gorai.002G000800.1 | .                  | .                  | . | .                  | .      |
| .                  | .                  | .                  | . | .                  | .      |
| .                  | .                  | .                  | . | .                  | .      |
| Vv03g0346          | Tc02_g003530       | .                  | . | .                  | .      |
| Gorai.012G158800.1 | .                  | .                  | . | .                  | .      |
| .                  | .                  | .                  | . | .                  | .      |
| Vv03g0347          | .                  | Gorai.002G206400.1 | . | Gorai.005G258800.1 | .      |
| .                  | Gorai.008G041000.1 | .                  | . | .                  | .      |
| .                  | .                  | .                  | . | .                  | .      |
| Vv03g0348          | .                  | .                  | . | .                  | .      |
| .                  | .                  | .                  | . | .                  | .      |
| .                  | .                  | .                  | . | .                  | .      |
| Vv03g0349          | Tc02_g003520       | Gorai.002G206500.1 | . | Gorai.             | .      |
| 005G258900.1       | .                  | .                  | . | .                  | .      |
| .                  | .                  | .                  | . | .                  | .      |
| .                  | .                  | .                  | . | .                  | .      |
| Vv03g0350          | Tc02_g003510       | Gorai.002G206600.1 | . | Gorai.             | .      |
| 005G259000.1       | .                  | .                  | . | .                  | .      |
| .                  | .                  | .                  | . | .                  | .      |

|                    |                    |                    |                    |
|--------------------|--------------------|--------------------|--------------------|
| Vv03g0351          | Tc02_g003500       | Gorai.002G206700.1 | Gorai.             |
| 005G259100.1       | Gorai.008G041100.1 | .                  | Vv18g0104          |
| Tc08_g005000       | .                  | .                  | .                  |
| Vv03g0352          | Tc02_g003490       | .                  | .                  |
| .                  | .                  | .                  | .                  |
| Vv03g0353          | Gorai.002G206800.1 | .                  | .                  |
| .                  | Vv18g0103          | Tc08_g005020       | Gorai.002G115700.1 |
| .                  | .                  | .                  | .                  |
| Vv03g0354          | Tc02_g012280       | .                  | Gorai.             |
| 008G014300.1       | .                  | .                  | .                  |
| Vv03g0355          | Tc02_g012290       | Gorai.013G063700.1 | .                  |
| Gorai.002G013600.1 | .                  | .                  | .                  |
| .                  | .                  | .                  | .                  |
| Vv03g0356          | .                  | .                  | .                  |
| .                  | .                  | .                  | .                  |
| Vv03g0357          | .                  | .                  | .                  |
| .                  | .                  | .                  | .                  |
| Vv03g0358          | .                  | .                  | .                  |
| .                  | .                  | .                  | .                  |
| Vv03g0359          | Tc02_g012340       | Gorai.013G063800.1 | Gorai.             |
| 005G217300.1       | .                  | .                  | .                  |
| .                  | .                  | .                  | .                  |
| Vv03g0360          | .                  | .                  | .                  |
| .                  | .                  | .                  | .                  |
| Vv03g0361          | .                  | .                  | Gorai.008G014100.1 |
| .                  | Vv18g0097          | Tc08_g005080       | Gorai.             |
| 005G114300.1       | Gorai.009G187000.1 | .                  | .                  |
| .                  | .                  | .                  | .                  |
| Vv03g0362          | Tc02_g012360       | .                  | .                  |
| Gorai.012G139400.1 | Vv18g0096          | Tc08_g005090       | Gorai.             |
| 002G115300.1       | .                  | .                  | .                  |
| .                  | .                  | .                  | .                  |
| Vv03g0363          | .                  | .                  | .                  |
| .                  | .                  | .                  | .                  |
| Vv03g0364          | Tc02_g012390       | Gorai.005G217200.1 | .                  |
| .                  | Gorai.012G139200.1 | .                  | .                  |
| .                  | .                  | .                  | .                  |
| .                  | .                  | .                  | .                  |

|                    |                    |                    |                    |   |   |   |
|--------------------|--------------------|--------------------|--------------------|---|---|---|
| Vv03g0365          | .                  | .                  | .                  | . | . | . |
| Vv18g0087          | Tc08_g005170       | Gorai.002G114800.1 | .                  | . | . | . |
| .                  | .                  | .                  | .                  | . | . | . |
| .                  | .                  | .                  | .                  | . | . | . |
| Vv03g0366          | .                  | .                  | .                  | . | . | . |
| .                  | .                  | .                  | .                  | . | . | . |
| .                  | .                  | .                  | .                  | . | . | . |
| Vv03g0367          | Tc02_g012400       | Gorai.013G063900.1 | Gorai.             | . | . | . |
| 005G217100.1       | .                  | .                  | .                  | . | . | . |
| .                  | .                  | .                  | .                  | . | . | . |
| .                  | .                  | .                  | .                  | . | . | . |
| Vv03g0368          | Tc02_g012430       | Gorai.005G216800.1 | .                  | . | . | . |
| .                  | Gorai.012G139100.1 | .                  | .                  | . | . | . |
| .                  | .                  | .                  | .                  | . | . | . |
| .                  | .                  | .                  | .                  | . | . | . |
| Vv03g0369          | Tc02_g012440       | Gorai.013G064100.1 | .                  | . | . | . |
| Gorai.008G013900.1 | .                  | Vv18g0080          | .                  | . | . | . |
| Tc08_g005230       | .                  | Gorai.009G186500.1 | .                  | . | . | . |
| .                  | .                  | .                  | .                  | . | . | . |
| .                  | .                  | .                  | .                  | . | . | . |
| Vv03g0370          | Tc02_g012460       | Gorai.013G064200.1 | Gorai.             | . | . | . |
| 005G216600.1       | Gorai.002G014400.1 | .                  | Gorai.012G139000.1 | . | . | . |
| .                  | .                  | .                  | .                  | . | . | . |
| .                  | .                  | .                  | .                  | . | . | . |
| Vv03g0371          | Tc02_g012470       | .                  | Gorai.             | . | . | . |
| 008G013800.1       | .                  | .                  | .                  | . | . | . |
| .                  | .                  | .                  | .                  | . | . | . |
| .                  | .                  | .                  | .                  | . | . | . |
| Vv03g0372          | Tc02_g012480       | Gorai.013G064500.1 | Gorai.             | . | . | . |
| 005G216500.1       | Gorai.008G013700.1 | Gorai.012G138900.1 | .                  | . | . | . |
| .                  | .                  | .                  | .                  | . | . | . |
| .                  | .                  | .                  | .                  | . | . | . |
| Vv03g0373          | Tc02_g012490       | .                  | Gorai.002G014500.1 | . | . | . |
| .                  | .                  | .                  | .                  | . | . | . |
| .                  | .                  | .                  | .                  | . | . | . |
| .                  | .                  | .                  | .                  | . | . | . |
| Vv03g0374          | .                  | .                  | .                  | . | . | . |
| .                  | .                  | .                  | .                  | . | . | . |
| .                  | .                  | .                  | .                  | . | . | . |
| .                  | .                  | .                  | .                  | . | . | . |
| Vv03g0375          | Tc02_g012520       | Gorai.013G064700.1 | .                  | . | . | . |
| .                  | Gorai.012G138800.1 | .                  | .                  | . | . | . |
| .                  | .                  | .                  | .                  | . | . | . |
| .                  | .                  | .                  | .                  | . | . | . |
| .                  | .                  | .                  | .                  | . | . | . |
| Vv03g0376          | Tc02_g012530       | .                  | Gorai.             | . | . | . |
| 008G013500.1       | Gorai.012G138700.1 | Vv18g0060          | .                  | . | . | . |
| .                  | .                  | .                  | .                  | . | . | . |
| .                  | .                  | .                  | .                  | . | . | . |
| Vv03g0377          | Tc02_g012540       | Gorai.013G064800.1 | .                  | . | . | . |
| .                  | .                  | .                  | .                  | . | . | . |
| .                  | .                  | .                  | .                  | . | . | . |
| .                  | .                  | .                  | .                  | . | . | . |
| Vv03g0378          | Tc02_g012550       | .                  | Gorai.             | . | . | . |
| 008G013400.1       | .                  | .                  | .                  | . | . | . |
| .                  | .                  | .                  | .                  | . | . | . |
| .                  | .                  | .                  | .                  | . | . | . |

|                    |                    |                    |                    |                    |   |
|--------------------|--------------------|--------------------|--------------------|--------------------|---|
| Vv03g0379          | Tc02_g012570       | .                  | .                  | .                  | . |
| Gorai.012G138600.1 | .                  | .                  | .                  | .                  | . |
| .                  | .                  | .                  | .                  | .                  | . |
| Vv03g0380          | .                  | .                  | .                  | .                  | . |
| .                  | .                  | .                  | .                  | .                  | . |
| .                  | .                  | .                  | .                  | .                  | . |
| Vv03g0381          | Tc02_g012580       | Gorai.013G064900.1 | Gorai.             | .                  | . |
| 005G216200.1       | .                  | Gorai.012G138500.1 | .                  | .                  | . |
| .                  | .                  | .                  | .                  | .                  | . |
| .                  | .                  | .                  | .                  | .                  | . |
| Vv03g0382          | Tc02_g012590       | Gorai.013G065000.1 | Gorai.             | .                  | . |
| 005G216100.1       | .                  | Gorai.012G138300.1 | .                  | .                  | . |
| .                  | .                  | .                  | .                  | .                  | . |
| .                  | .                  | .                  | .                  | .                  | . |
| Vv03g0383          | Tc02_g012600       | .                  | .                  | Gorai.             | . |
| 008G013200.1       | .                  | .                  | .                  | .                  | . |
| .                  | .                  | .                  | .                  | .                  | . |
| Vv03g0384          | Tc02_g012610       | .                  | Gorai.005G216000.1 | .                  | . |
| .                  | .                  | .                  | .                  | .                  | . |
| .                  | .                  | .                  | .                  | .                  | . |
| Vv03g0385          | Tc02_g012620       | .                  | .                  | Gorai.002G014600.1 | . |
| .                  | .                  | .                  | .                  | .                  | . |
| .                  | .                  | .                  | .                  | .                  | . |
| Vv03g0386          | Tc02_g012630       | Gorai.013G065100.1 | Gorai.             | .                  | . |
| 005G215900.1       | .                  | Gorai.008G013100.1 | Gorai.012G138200.1 | .                  | . |
| .                  | .                  | .                  | .                  | .                  | . |
| .                  | .                  | .                  | .                  | .                  | . |
| Vv03g0387          | .                  | .                  | .                  | .                  | . |
| .                  | .                  | .                  | .                  | .                  | . |
| .                  | .                  | .                  | .                  | .                  | . |
| Vv03g0388          | Tc02_g012640       | Gorai.013G065200.1 | Gorai.             | .                  | . |
| 005G215700.1       | Gorai.002G014700.1 | Gorai.008G013000.1 | .                  | .                  | . |
| Gorai.012G138100.1 | Vv18g0044          | .                  | .                  | .                  | . |
| .                  | .                  | .                  | .                  | .                  | . |
| .                  | .                  | .                  | .                  | .                  | . |
| Vv03g0389          | Tc02_g012650       | .                  | Gorai.005G215400.1 | .                  | . |
| .                  | Gorai.012G138000.1 | Vv18g0042          | .                  | .                  | . |
| .                  | .                  | .                  | .                  | .                  | . |
| .                  | .                  | .                  | .                  | .                  | . |
| Vv03g0390          | Tc02_g012660       | .                  | .                  | .                  | . |
| Gorai.012G137800.1 | .                  | .                  | .                  | .                  | . |
| .                  | .                  | .                  | .                  | .                  | . |
| Vv03g0391          | .                  | .                  | .                  | .                  | . |
| .                  | .                  | .                  | .                  | .                  | . |
| .                  | .                  | .                  | .                  | .                  | . |
| Vv03g0392          | Tc02_g014050       | .                  | .                  | .                  | . |
| .                  | .                  | .                  | .                  | .                  | . |
| .                  | .                  | .                  | .                  | .                  | . |
| Vv03g0393          | Tc02_g027460       | Gorai.013G065300.1 | .                  | .                  | . |
| .                  | Gorai.012G137600.1 | Vv18g0039          | .                  | .                  | . |

|                    |                    |                    |   |                    |   |        |   |
|--------------------|--------------------|--------------------|---|--------------------|---|--------|---|
| .                  | .                  | .                  | . | .                  | . | .      | . |
| .                  | .                  | .                  | . | .                  | . | .      | . |
| Vv03g0394          | Tc02_g027450       | .                  | . | .                  | . | .      | . |
| .                  | .                  | .                  | . | .                  | . | .      | . |
| .                  | .                  | .                  | . | .                  | . | .      | . |
| Vv03g0395          | Tc02_g012710       | .                  | . | .                  | . | Gorai. | . |
| 008G012900.1       | Vv18g0025          | .                  | . | .                  | . | .      | . |
| .                  | .                  | .                  | . | .                  | . | .      | . |
| .                  | .                  | .                  | . | .                  | . | .      | . |
| Vv03g0396          | Tc02_g012720       | .                  | . | .                  | . | Gorai. | . |
| 008G012800.1       | .                  | .                  | . | .                  | . | .      | . |
| .                  | .                  | .                  | . | .                  | . | .      | . |
| Vv03g0397          | Tc02_g012730       | Gorai.013G065400.1 | . | .                  | . | .      | . |
| .                  | .                  | .                  | . | .                  | . | .      | . |
| .                  | .                  | .                  | . | .                  | . | .      | . |
| Vv03g0398          | Tc02_g012740       | Gorai.013G065500.1 | . | .                  | . | .      | . |
| .                  | .                  | .                  | . | .                  | . | .      | . |
| .                  | .                  | .                  | . | .                  | . | .      | . |
| Vv03g0399          | Tc02_g012770       | Gorai.013G065600.1 | . | .                  | . | .      | . |
| Gorai.008G012600.1 | .                  | .                  | . | .                  | . | .      | . |
| .                  | .                  | .                  | . | .                  | . | .      | . |
| .                  | .                  | .                  | . | .                  | . | .      | . |
| Vv03g0400          | .                  | .                  | . | Gorai.008G012500.1 | . | .      | . |
| .                  | .                  | .                  | . | .                  | . | .      | . |
| .                  | .                  | .                  | . | .                  | . | .      | . |
| Vv03g0401          | .                  | .                  | . | .                  | . | .      | . |
| .                  | .                  | .                  | . | .                  | . | .      | . |
| .                  | .                  | .                  | . | .                  | . | .      | . |
| Vv03g0402          | Tc02_g012780       | .                  | . | .                  | . | Gorai. | . |
| 008G012400.1       | .                  | .                  | . | .                  | . | .      | . |
| .                  | .                  | .                  | . | .                  | . | .      | . |
| Vv03g0403          | .                  | Gorai.005G215000.1 | . | .                  | . | Gorai. | . |
| 002G014800.1       | .                  | .                  | . | .                  | . | .      | . |
| .                  | .                  | .                  | . | .                  | . | .      | . |
| .                  | .                  | .                  | . | .                  | . | .      | . |
| Vv03g0404          | Tc02_g012810       | .                  | . | .                  | . | .      | . |
| .                  | .                  | .                  | . | .                  | . | .      | . |
| .                  | .                  | .                  | . | .                  | . | .      | . |
| Vv03g0405          | .                  | .                  | . | .                  | . | .      | . |
| .                  | .                  | .                  | . | .                  | . | .      | . |
| .                  | .                  | .                  | . | .                  | . | .      | . |
| Vv03g0406          | .                  | .                  | . | .                  | . | .      | . |
| .                  | .                  | .                  | . | .                  | . | .      | . |
| .                  | .                  | .                  | . | .                  | . | .      | . |
| Vv03g0407          | Tc02_g012820       | .                  | . | .                  | . | Gorai. | . |
| 008G012300.1       | .                  | .                  | . | .                  | . | .      | . |
| .                  | .                  | .                  | . | .                  | . | .      | . |
| Vv03g0408          | Tc02_g012840       | Gorai.013G065700.1 | . | .                  | . | Gorai. | . |
| 005G214800.1       | Gorai.008G009400.1 | Gorai.012G135700.1 | . | .                  | . | .      | . |
| .                  | .                  | .                  | . | .                  | . | .      | . |



|                    |              |                    |   |   |   |           |   |
|--------------------|--------------|--------------------|---|---|---|-----------|---|
| Vv03g0409          | .            | .                  | . | . | . | .         | . |
| .                  | .            | .                  | . | . | . | .         | . |
| Vv03g0410          | .            | .                  | . | . | . | .         | . |
| .                  | .            | .                  | . | . | . | .         | . |
| Vv03g0411          | .            | .                  | . | . | . | .         | . |
| .                  | .            | .                  | . | . | . | .         | . |
| Vv03g0412          | .            | .                  | . | . | . | .         | . |
| .                  | .            | .                  | . | . | . | .         | . |
| Vv03g0413          | .            | Gorai.013G034700.1 | . | . | . | .         | . |
| Gorai.008G031000.1 | .            | .                  | . | . | . | .         | . |
| .                  | .            | .                  | . | . | . | .         | . |
| Vv03g0414          | .            | Gorai.005G212300.1 | . | . | . | .         | . |
| Gorai.008G030900.1 | .            | .                  | . | . | . | .         | . |
| .                  | .            | .                  | . | . | . | .         | . |
| Vv03g0415          | .            | .                  | . | . | . | .         | . |
| .                  | .            | .                  | . | . | . | .         | . |
| Vv03g0416          | .            | .                  | . | . | . | .         | . |
| .                  | .            | .                  | . | . | . | .         | . |
| Vv03g0417          | Tc02_g014030 | .                  | . | . | . | .         | . |
| .                  | .            | .                  | . | . | . | .         | . |
| Vv03g0418          | .            | .                  | . | . | . | .         | . |
| .                  | .            | .                  | . | . | . | .         | . |
| Vv03g0419          | .            | Gorai.005G246000.1 | . | . | . | .         | . |
| .                  | .            | .                  | . | . | . | .         | . |
| Vv03g0420          | .            | .                  | . | . | . | .         | . |
| .                  | .            | .                  | . | . | . | .         | . |
| Vv03g0421          | .            | Gorai.013G034900.1 | . | . | . | .         | . |
| Gorai.008G030700.1 | .            | .                  | . | . | . | .         | . |
| .                  | .            | .                  | . | . | . | .         | . |
| Vv03g0422          | .            | .                  | . | . | . | .         | . |
| .                  | .            | .                  | . | . | . | .         | . |
| Vv03g0423          | Tc02_g006510 | Gorai.013G035100.1 | . | . | . | .         | . |
| Gorai.008G030600.1 | .            | Gorai.012G154900.1 | . | . | . | Vv18g0004 | . |
| .                  | .            | .                  | . | . | . | .         | . |
| .                  | .            | .                  | . | . | . | .         | . |

|                    |                    |                    |                    |   |   |   |   |
|--------------------|--------------------|--------------------|--------------------|---|---|---|---|
| Vv03g0424          | .                  | .                  | .                  | . | . | . | . |
| .                  | .                  | .                  | .                  | . | . | . | . |
| Vv03g0425          | Tc02_g006520       | Gorai.013G035200.1 | Gorai.             | . | . | . | . |
| 005G245700.1       | .                  | Gorai.012G155000.1 | Vv18g1139          | . | . | . | . |
|                    | Tc08_g002600       | Gorai.002G126500.1 | Gorai.005G109600.1 | . | . | . | . |
|                    | Gorai.009G199300.1 | .                  | Gorai.010G008000.1 | . | . | . | . |
| Vv03g0426          | .                  | .                  | .                  | . | . | . | . |
| .                  | .                  | .                  | .                  | . | . | . | . |
| Vv03g0427          | Tc02_g006530       | Gorai.013G035300.1 | Gorai.             | . | . | . | . |
| 005G245600.1       | .                  | Gorai.008G030400.1 | .                  | . | . | . | . |
| .                  | .                  | .                  | .                  | . | . | . | . |
| Vv03g0428          | Tc02_g006540       | Gorai.013G035400.1 | Gorai.             | . | . | . | . |
| 005G245500.1       | .                  | Gorai.008G030300.1 | Gorai.012G155100.1 | . | . | . | . |
|                    | Vv18g1131          | Tc08_g002530       | Gorai.005G109200.1 | . | . | . | . |
|                    | Gorai.009G199800.1 | .                  | .                  | . | . | . | . |
| Vv03g0429          | Tc02_g006550       | Gorai.013G035500.1 | .                  | . | . | . | . |
|                    | Gorai.008G030100.1 | .                  | .                  | . | . | . | . |
| .                  | .                  | .                  | .                  | . | . | . | . |
| Vv03g0430          | .                  | .                  | .                  | . | . | . | . |
| Vv18g1130          | .                  | .                  | .                  | . | . | . | . |
| Vv03g0431          | Tc02_g006560       | Gorai.005G245400.1 | .                  | . | . | . | . |
|                    | .                  | Vv18g1129          | .                  | . | . | . | . |
| .                  | .                  | .                  | .                  | . | . | . | . |
| Vv03g0432          | Tc02_g006600       | Gorai.005G245300.1 | .                  | . | . | . | . |
|                    | Gorai.008G030000.1 | .                  | .                  | . | . | . | . |
| .                  | .                  | .                  | .                  | . | . | . | . |
| Vv03g0433          | Tc02_g006610       | Gorai.005G245200.1 | .                  | . | . | . | . |
|                    | .                  | Vv18g1124          | Tc08_g002470       | . | . | . | . |
|                    | Gorai.009G200100.1 | .                  | Gorai.010G008500.1 | . | . | . | . |
| Vv03g0434          | .                  | .                  | .                  | . | . | . | . |
| .                  | .                  | .                  | .                  | . | . | . | . |
| Vv03g0435          | Tc02_g006680       | Gorai.013G035700.1 | Gorai.             | . | . | . | . |
| 005G245000.1       | .                  | Gorai.008G029900.1 | Gorai.012G155200.1 | . | . | . | . |
| .                  | .                  | .                  | .                  | . | . | . | . |
| Vv03g0436          | Tc02_g006690       | Gorai.013G035800.1 | Gorai.             | . | . | . | . |
| 005G244900.1       | .                  | .                  | Vv18g1118          | . | . | . | . |
| Tc08_g002410       | .                  | Gorai.009G200400.1 | .                  | . | . | . | . |
| Gorai.010G008700.1 | .                  | .                  | .                  | . | . | . | . |

|              |              |                    |                    |   |
|--------------|--------------|--------------------|--------------------|---|
| Vv03g0437    | Tc02_g006700 | .                  | Gorai.005G244800.1 | . |
| .            | .            | .                  | .                  | . |
| Vv03g0438    | .            | .                  | Gorai.008G029800.1 | . |
| .            | .            | .                  | .                  | . |
| Vv03g0439    | Tc02_g006710 | .                  | .                  | . |
| .            | .            | .                  | .                  | . |
| Vv03g0440    | .            | .                  | .                  | . |
| .            | .            | .                  | .                  | . |
| Vv03g0441    | Tc02_g006720 | Gorai.013G035900.1 | Gorai.             | . |
| 005G244700.1 | .            | Gorai.008G029700.1 | Vv18g1104          | . |
| Tc08_g002320 | .            | .                  | Gorai.             | . |
| 010G009200.1 | .            | .                  | .                  | . |
| Vv03g0442    | Tc02_g006730 | .                  | Gorai.005G244600.1 | . |
| .            | .            | .                  | .                  | . |
| Vv03g0443    | .            | Gorai.005G244500.1 | .                  | . |
| .            | .            | .                  | .                  | . |
| Vv03g0444    | Tc02_g006740 | .                  | .                  | . |
| .            | .            | .                  | .                  | . |
| Vv03g0445    | Tc02_g006750 | .                  | .                  | . |
| .            | .            | .                  | .                  | . |
| Vv03g0446    | .            | .                  | .                  | . |
| .            | .            | .                  | .                  | . |
| Vv03g0447    | .            | .                  | .                  | . |
| .            | .            | .                  | .                  | . |
| Vv03g0448    | .            | .                  | .                  | . |
| .            | .            | .                  | .                  | . |
| Vv03g0449    | .            | .                  | .                  | . |
| .            | .            | .                  | .                  | . |
| Vv03g0450    | .            | .                  | .                  | . |
| Vv18g1103    | Tc08_g002300 | Gorai.002G127000.1 | .                  | . |
| .            | .            | .                  | .                  | . |
| Vv03g0451    | .            | .                  | .                  | . |
| .            | .            | .                  | .                  | . |
| Vv03g0452    | Tc02_g006770 | .                  | .                  | . |
| .            | .            | .                  | .                  | . |

|                    |                    |                    |                    |        |
|--------------------|--------------------|--------------------|--------------------|--------|
| Vv03g0453          | Tc02_g006800       | .                  | Gorai.005G244400.1 | .      |
|                    | Gorai.008G029600.1 | .                  | .                  | .      |
| .                  | .                  | .                  | .                  | .      |
| Vv03g0454          | Tc02_g006830       | .                  | Gorai.005G244300.1 | .      |
|                    | Vv18g1101          | .                  | Tc08_g002280       | .      |
|                    | Gorai.009G201000.1 | Gorai.009G272700.1 | .                  | .      |
| .                  | .                  | .                  | .                  | .      |
| Vv03g0455          | Tc02_g006850       | .                  | .                  | Gorai. |
| 008G029500.1       | Gorai.012G155300.1 | .                  | .                  | .      |
| .                  | .                  | .                  | .                  | .      |
| Vv03g0456          | Tc02_g006860       | Gorai.013G036400.1 | Gorai.             | .      |
| 005G244200.1       | Gorai.008G029300.1 | .                  | .                  | .      |
| .                  | .                  | .                  | .                  | .      |
| Vv03g0457          | .                  | .                  | .                  | .      |
| .                  | .                  | .                  | .                  | .      |
| Vv03g0458          | .                  | .                  | .                  | .      |
| .                  | .                  | .                  | .                  | .      |
| Vv03g0459          | .                  | .                  | .                  | .      |
| .                  | .                  | .                  | .                  | .      |
| Vv03g0460          | .                  | .                  | .                  | .      |
| .                  | .                  | .                  | .                  | .      |
| Vv03g0461          | Tc02_g006880       | Gorai.013G036700.1 | .                  | .      |
| .                  | Gorai.012G155400.1 | Vv18g1095          | .                  | .      |
| Tc08_g002220       | Gorai.002G127300.1 | .                  | Gorai.009G201200.1 | .      |
|                    | Gorai.009G273000.1 | .                  | .                  | .      |
| .                  | .                  | .                  | .                  | .      |
| Vv03g0462          | .                  | .                  | .                  | .      |
| .                  | .                  | .                  | .                  | .      |
| Vv03g0463          | Tc02_g006920       | .                  | .                  | Gorai. |
| 008G015800.1       | .                  | .                  | .                  | .      |
| .                  | .                  | .                  | .                  | .      |
| Vv03g0464          | Tc02_g006950       | .                  | Gorai.005G244100.1 | .      |
| .                  | Vv18g1090          | .                  | Tc08_g002160       | .      |
| Gorai.005G108000.1 | Gorai.009G201600.1 | .                  | .                  | .      |
| .                  | .                  | .                  | .                  | .      |
| Vv03g0465          | .                  | .                  | .                  | .      |
| .                  | .                  | .                  | .                  | .      |
| Vv03g0466          | .                  | .                  | .                  | .      |
| .                  | .                  | .                  | .                  | .      |
| .                  | .                  | .                  | .                  | .      |

|                    |                    |                    |                    |   |
|--------------------|--------------------|--------------------|--------------------|---|
| Vv03g0467          | Tc02_g006960       | .                  | Gorai.005G244000.1 | . |
| .                  | .                  | .                  | .                  | . |
| Vv03g0468          | Tc02_g006970       | Gorai.013G036800.1 | Gorai.             | . |
| 005G243900.1       | .                  | .                  | .                  | . |
| .                  | .                  | .                  | .                  | . |
| Vv03g0469          | Tc02_g006980       | Gorai.013G036900.1 | Gorai.             | . |
| 005G243800.1       | .                  | .                  | .                  | . |
| .                  | .                  | .                  | .                  | . |
| Vv03g0470          | Tc02_g006990       | Gorai.013G037000.1 | .                  | . |
| .                  | .                  | .                  | .                  | . |
| Vv03g0471          | .                  | .                  | .                  | . |
| .                  | .                  | .                  | .                  | . |
| Vv03g0472          | Tc02_g007000       | .                  | .                  | . |
| Gorai.012G155500.1 | .                  | .                  | .                  | . |
| .                  | .                  | .                  | .                  | . |
| Vv03g0473          | Tc02_g007010       | Gorai.013G037100.1 | Gorai.             | . |
| 005G243700.1       | Gorai.008G028900.1 | .                  | .                  | . |
| .                  | .                  | .                  | .                  | . |
| Vv03g0474          | Tc02_g007020       | Gorai.005G243600.1 | .                  | . |
| Gorai.008G028800.1 | .                  | .                  | .                  | . |
| .                  | .                  | .                  | .                  | . |
| Vv03g0475          | Tc02_g007030       | Gorai.013G037200.1 | .                  | . |
| .                  | Vv18g1079          | Tc08_g002030       | .                  | . |
| Gorai.009G202400.1 | .                  | .                  | .                  | . |
| .                  | .                  | .                  | .                  | . |
| Vv03g0476          | Tc02_g007050       | Gorai.013G037300.1 | .                  | . |
| Gorai.008G028700.1 | .                  | .                  | .                  | . |
| .                  | .                  | .                  | .                  | . |
| Vv03g0477          | .                  | .                  | .                  | . |
| .                  | .                  | .                  | .                  | . |
| Vv03g0478          | Tc02_g007060       | Gorai.005G243300.1 | .                  | . |
| Gorai.008G028600.1 | .                  | .                  | .                  | . |
| .                  | .                  | .                  | .                  | . |
| Vv03g0479          | Tc02_g007070       | Gorai.013G037400.1 | Gorai.             | . |
| 005G243200.1       | .                  | .                  | .                  | . |
| .                  | .                  | .                  | .                  | . |
| Vv03g0480          | Tc02_g007080       | Gorai.005G243100.1 | .                  | . |
| .                  | Vv18g1075          | Tc08_g001980       | .                  | . |
| Gorai.009G202900.1 | .                  | .                  | .                  | . |

|                    |              |                    |                    |   |                    |   |   |
|--------------------|--------------|--------------------|--------------------|---|--------------------|---|---|
| Vv03g0481          | .            | .                  | .                  | . | .                  | . | . |
| .                  | .            | .                  | .                  | . | .                  | . | . |
| Vv03g0482          | Tc02_g007090 | .                  | Gorai.013G037500.1 | . | Gorai.             | . | . |
| 005G243000.1       | .            | .                  | .                  | . | .                  | . | . |
| .                  | .            | .                  | .                  | . | .                  | . | . |
| Vv03g0483          | .            | .                  | .                  | . | .                  | . | . |
| .                  | .            | .                  | .                  | . | .                  | . | . |
| Vv03g0484          | .            | .                  | .                  | . | .                  | . | . |
| .                  | .            | .                  | .                  | . | .                  | . | . |
| Vv03g0485          | Tc02_g007100 | .                  | Gorai.013G037600.1 | . | Gorai.             | . | . |
| 005G240000.1       | .            | Gorai.008G028500.1 | .                  | . | .                  | . | . |
| .                  | .            | .                  | .                  | . | .                  | . | . |
| Vv03g0486          | Tc02_g007110 | .                  | Gorai.013G037700.1 | . | .                  | . | . |
| .                  | .            | .                  | .                  | . | .                  | . | . |
| Vv03g0487          | .            | .                  | .                  | . | .                  | . | . |
| .                  | .            | .                  | .                  | . | .                  | . | . |
| Vv03g0488          | Tc02_g007120 | .                  | Gorai.013G037800.1 | . | Gorai.             | . | . |
| 005G242800.1       | .            | Gorai.008G028300.1 | .                  | . | .                  | . | . |
| .                  | .            | .                  | .                  | . | .                  | . | . |
| Vv03g0489          | .            | .                  | .                  | . | Gorai.008G025600.1 | . | . |
| Gorai.012G152400.1 | .            | .                  | .                  | . | .                  | . | . |
| .                  | .            | .                  | .                  | . | .                  | . | . |
| Vv03g0490          | Tc02_g007130 | .                  | Gorai.005G242600.1 | . | .                  | . | . |
| .                  | .            | .                  | .                  | . | .                  | . | . |
| Vv03g0491          | .            | .                  | .                  | . | .                  | . | . |
| .                  | .            | .                  | .                  | . | .                  | . | . |
| Vv03g0492          | .            | .                  | .                  | . | .                  | . | . |
| .                  | .            | .                  | .                  | . | .                  | . | . |
| Vv03g0493          | .            | .                  | .                  | . | .                  | . | . |
| .                  | .            | .                  | .                  | . | .                  | . | . |
| Vv03g0494          | .            | .                  | .                  | . | .                  | . | . |
| .                  | .            | .                  | .                  | . | .                  | . | . |
| Vv03g0495          | .            | .                  | .                  | . | .                  | . | . |
| .                  | .            | .                  | .                  | . | .                  | . | . |
| .                  | .            | .                  | .                  | . | .                  | . | . |

|                    |                    |                    |                    |        |   |
|--------------------|--------------------|--------------------|--------------------|--------|---|
| Vv03g0496          | Tc02_g007140       | .                  | .                  | .      | . |
| Gorai.012G152300.1 | .                  | .                  | .                  | .      | . |
| .                  | .                  | .                  | .                  | .      | . |
| Vv03g0497          | .                  | .                  | .                  | .      | . |
| .                  | .                  | .                  | .                  | .      | . |
| .                  | .                  | .                  | .                  | .      | . |
| Vv03g0498          | Tc02_g007160       | .                  | Gorai.005G261700.1 | .      | . |
| .                  | Gorai.012G152100.1 | .                  | .                  | .      | . |
| .                  | .                  | .                  | .                  | .      | . |
| .                  | .                  | .                  | .                  | .      | . |
| Vv03g0499          | .                  | Gorai.013G053000.1 | Gorai.005G261800.1 | .      | . |
| .                  | .                  | Gorai.012G149100.1 | .                  | .      | . |
| .                  | .                  | .                  | .                  | .      | . |
| .                  | .                  | .                  | .                  | .      | . |
| Vv03g0500          | .                  | .                  | .                  | .      | . |
| .                  | .                  | .                  | .                  | .      | . |
| .                  | .                  | .                  | .                  | .      | . |
| Vv03g0501          | .                  | .                  | .                  | .      | . |
| .                  | .                  | .                  | .                  | .      | . |
| .                  | .                  | .                  | .                  | .      | . |
| Vv03g0502          | .                  | Gorai.013G052900.1 | .                  | .      | . |
| Gorai.008G018600.1 | .                  | .                  | .                  | .      | . |
| .                  | .                  | .                  | .                  | .      | . |
| .                  | .                  | .                  | .                  | .      | . |
| Vv03g0503          | .                  | .                  | .                  | .      | . |
| .                  | .                  | .                  | .                  | .      | . |
| .                  | .                  | .                  | .                  | .      | . |
| Vv03g0504          | .                  | Gorai.005G228300.1 | .                  | .      | . |
| Gorai.012G146000.1 | .                  | .                  | .                  | .      | . |
| .                  | .                  | .                  | .                  | .      | . |
| .                  | .                  | .                  | .                  | .      | . |
| Vv03g0505          | .                  | Gorai.005G228400.1 | .                  | .      | . |
| Gorai.012G146100.1 | .                  | .                  | .                  | .      | . |
| .                  | .                  | .                  | .                  | .      | . |
| .                  | .                  | .                  | .                  | .      | . |
| Vv03g0506          | .                  | .                  | .                  | .      | . |
| .                  | .                  | .                  | .                  | .      | . |
| .                  | .                  | .                  | .                  | .      | . |
| Vv03g0507          | .                  | .                  | .                  | .      | . |
| .                  | .                  | .                  | .                  | .      | . |
| .                  | .                  | .                  | .                  | .      | . |
| Vv03g0508          | Tc02_g007240       | .                  | .                  | .      | . |
| .                  | .                  | .                  | .                  | .      | . |
| .                  | .                  | .                  | .                  | .      | . |
| Vv03g0509          | .                  | Gorai.005G228600.1 | .                  | .      | . |
| Gorai.012G146300.1 | .                  | .                  | .                  | .      | . |
| .                  | .                  | .                  | .                  | .      | . |
| .                  | .                  | .                  | .                  | .      | . |
| Vv03g0510          | .                  | .                  | .                  | Gorai. | . |
| 012G146400.1       | Vv18g1041          | Tc08_g001790       | .                  | .      | . |

|                    |                    |                    |   |   |   |
|--------------------|--------------------|--------------------|---|---|---|
| .                  | Gorai.010G011500.1 | .                  | . | . | . |
| .                  | .                  | .                  | . | . | . |
| Vv03g0511          | Gorai.013G052800.1 | .                  | . | . | . |
| Gorai.008G018900.1 | Vv18g1036          | Tc08_g001770       | . | . | . |
| Gorai.002G129500.1 | Gorai.009G204300.1 | .                  | . | . | . |
| Gorai.010G011700.1 | .                  | .                  | . | . | . |
| .                  | .                  | .                  | . | . | . |
| Vv03g0512          | Gorai.005G228800.1 | .                  | . | . | . |
| .                  | .                  | .                  | . | . | . |
| .                  | .                  | .                  | . | . | . |
| Vv03g0513          | .                  | .                  | . | . | . |
| .                  | .                  | .                  | . | . | . |
| .                  | .                  | .                  | . | . | . |
| Vv03g0514          | .                  | .                  | . | . | . |
| .                  | .                  | .                  | . | . | . |
| .                  | .                  | .                  | . | . | . |
| Vv03g0515          | .                  | .                  | . | . | . |
| .                  | .                  | .                  | . | . | . |
| .                  | .                  | .                  | . | . | . |
| Vv03g0516          | .                  | .                  | . | . | . |
| .                  | .                  | .                  | . | . | . |
| .                  | .                  | .                  | . | . | . |
| Vv03g0517          | Gorai.013G052700.1 | .                  | . | . | . |
| Gorai.012G146500.1 | .                  | .                  | . | . | . |
| .                  | .                  | .                  | . | . | . |
| .                  | .                  | .                  | . | . | . |
| Vv03g0518          | Gorai.013G052500.1 | Gorai.005G228900.1 | . | . | . |
| .                  | .                  | .                  | . | . | . |
| .                  | .                  | .                  | . | . | . |
| .                  | .                  | .                  | . | . | . |
| Vv03g0519          | Gorai.013G052400.1 | .                  | . | . | . |
| .                  | Vv18g1015          | Tc08_g001660       | . | . | . |
| .                  | Gorai.010G012300.1 | .                  | . | . | . |
| .                  | .                  | .                  | . | . | . |
| Vv03g0520          | Tc02_g007480       | .                  | . | . | . |
| Gorai.012G146700.1 | .                  | .                  | . | . | . |
| .                  | .                  | .                  | . | . | . |
| .                  | .                  | .                  | . | . | . |
| Vv03g0521          | .                  | .                  | . | . | . |
| .                  | .                  | .                  | . | . | . |
| .                  | .                  | .                  | . | . | . |
| Vv03g0522          | Gorai.005G229000.1 | .                  | . | . | . |
| .                  | .                  | .                  | . | . | . |
| .                  | .                  | .                  | . | . | . |
| Vv03g0523          | Gorai.013G052300.1 | Gorai.005G229100.1 | . | . | . |
| .                  | Gorai.008G019000.1 | .                  | . | . | . |
| .                  | .                  | .                  | . | . | . |
| .                  | .                  | .                  | . | . | . |
| Vv03g0524          | Gorai.005G229200.1 | .                  | . | . | . |
| .                  | .                  | .                  | . | . | . |
| .                  | .                  | .                  | . | . | . |



|                    |   |                    |                    |                    |                    |        |
|--------------------|---|--------------------|--------------------|--------------------|--------------------|--------|
| Vv03g0525          | . | .                  | .                  | .                  | .                  | Gorai. |
| 012G146900.1       | . | .                  | .                  | .                  | .                  | .      |
| .                  | . | .                  | .                  | .                  | .                  | .      |
| Vv03g0526          | . | Gorai.013G049300.1 | .                  | Gorai.005G263200.1 | .                  | .      |
| .                  | . | Gorai.012G163300.1 | .                  | Vv18g0998          | .                  | .      |
| Tc08_g001540       | . | .                  | .                  | .                  | .                  | .      |
| .                  | . | .                  | .                  | .                  | .                  | .      |
| Vv03g0527          | . | Gorai.002G213700.1 | .                  | .                  | .                  | .      |
| Gorai.012G163400.1 | . | .                  | .                  | .                  | .                  | .      |
| .                  | . | .                  | .                  | .                  | .                  | .      |
| .                  | . | .                  | .                  | .                  | .                  | .      |
| Vv03g0528          | . | Gorai.002G213800.1 | .                  | .                  | .                  | .      |
| .                  | . | .                  | .                  | .                  | .                  | .      |
| .                  | . | .                  | .                  | .                  | .                  | .      |
| Vv03g0529          | . | .                  | .                  | .                  | Gorai.             | .      |
| 012G163500.1       | . | .                  | .                  | .                  | .                  | .      |
| .                  | . | .                  | .                  | .                  | .                  | .      |
| Vv03g0530          | . | .                  | .                  | .                  | Gorai.             | .      |
| 012G163700.1       | . | .                  | .                  | .                  | .                  | .      |
| .                  | . | .                  | .                  | .                  | .                  | .      |
| Vv03g0531          | . | .                  | .                  | .                  | Gorai.008G043600.1 | .      |
| .                  | . | .                  | .                  | .                  | .                  | .      |
| .                  | . | .                  | .                  | .                  | .                  | .      |
| Vv03g0532          | . | .                  | Gorai.005G263400.1 | .                  | .                  | .      |
| Gorai.008G043700.1 | . | .                  | .                  | .                  | .                  | .      |
| .                  | . | .                  | .                  | .                  | .                  | .      |
| .                  | . | .                  | .                  | .                  | .                  | .      |
| Vv03g0533          | . | .                  | .                  | .                  | .                  | .      |
| .                  | . | .                  | .                  | .                  | .                  | .      |
| .                  | . | .                  | .                  | .                  | .                  | .      |
| Vv03g0534          | . | Gorai.002G214000.1 | .                  | .                  | .                  | .      |
| .                  | . | .                  | .                  | .                  | .                  | .      |
| .                  | . | .                  | .                  | .                  | .                  | .      |
| Vv03g0535          | . | .                  | .                  | .                  | .                  | .      |
| .                  | . | .                  | .                  | .                  | .                  | .      |
| .                  | . | .                  | .                  | .                  | .                  | .      |
| Vv03g0536          | . | .                  | .                  | .                  | .                  | .      |
| .                  | . | .                  | .                  | .                  | .                  | .      |
| .                  | . | .                  | .                  | .                  | .                  | .      |
| Vv03g0537          | . | .                  | .                  | .                  | .                  | .      |
| .                  | . | .                  | .                  | .                  | .                  | .      |
| .                  | . | .                  | .                  | .                  | .                  | .      |
| Vv03g0538          | . | .                  | .                  | .                  | .                  | .      |
| .                  | . | .                  | .                  | .                  | .                  | .      |
| .                  | . | .                  | .                  | .                  | .                  | .      |
| Vv03g0539          | . | Gorai.002G214200.1 | .                  | .                  | .                  | .      |
| .                  | . | .                  | .                  | .                  | .                  | .      |
| .                  | . | .                  | .                  | .                  | .                  | .      |
| Vv03g0540          | . | .                  | .                  | .                  | Gorai.008G043800.1 | .      |
| Gorai.012G164000.1 | . | .                  | .                  | .                  | .                  | .      |

|                    |                    |                    |                    |   |                    |   |   |
|--------------------|--------------------|--------------------|--------------------|---|--------------------|---|---|
| .                  | .                  | .                  | .                  | . | .                  | . | . |
| .                  | .                  | .                  | .                  | . | .                  | . | . |
| Vv03g0541          | .                  | .                  | .                  | . | .                  | . | . |
| .                  | .                  | .                  | .                  | . | .                  | . | . |
| Vv03g0542          | .                  | .                  | .                  | . | Gorai.008G043900.1 | . | . |
| .                  | .                  | .                  | .                  | . | .                  | . | . |
| Vv03g0543          | .                  | .                  | .                  | . | .                  | . | . |
| .                  | .                  | .                  | .                  | . | .                  | . | . |
| Vv03g0544          | .                  | .                  | .                  | . | Gorai.008G044100.1 | . | . |
| .                  | .                  | .                  | .                  | . | .                  | . | . |
| Vv03g0545          | .                  | .                  | .                  | . | .                  | . | . |
| .                  | .                  | .                  | .                  | . | .                  | . | . |
| Vv03g0546          | Tc02_g007490       | .                  | Gorai.005G263800.1 | . | .                  | . | . |
|                    | Gorai.008G031300.1 | Gorai.012G164100.1 | .                  | . | .                  | . | . |
| .                  | .                  | .                  | .                  | . | .                  | . | . |
| Vv03g0547          | .                  | Gorai.002G214300.1 | .                  | . | .                  | . | . |
|                    | Gorai.012G164200.1 | .                  | .                  | . | .                  | . | . |
| .                  | .                  | .                  | .                  | . | .                  | . | . |
| Vv03g0548          | .                  | Gorai.002G214500.1 | .                  | . | .                  | . | . |
| Gorai.008G019100.1 | .                  | .                  | .                  | . | .                  | . | . |
| .                  | .                  | .                  | .                  | . | .                  | . | . |
| Vv03g0549          | .                  | .                  | .                  | . | Gorai.008G044200.1 | . | . |
| .                  | .                  | .                  | .                  | . | .                  | . | . |
| Vv03g0550          | .                  | .                  | .                  | . | .                  | . | . |
| .                  | .                  | .                  | .                  | . | .                  | . | . |
| Vv03g0551          | .                  | .                  | Gorai.005G264000.1 | . | .                  | . | . |
| .                  | .                  | .                  | .                  | . | .                  | . | . |
| Vv03g0552          | .                  | .                  | .                  | . | .                  | . | . |
| .                  | .                  | .                  | .                  | . | .                  | . | . |
| Vv03g0553          | .                  | .                  | .                  | . | .                  | . | . |
| .                  | .                  | .                  | .                  | . | .                  | . | . |
| Vv03g0554          | .                  | .                  | .                  | . | .                  | . | . |
| .                  | .                  | .                  | .                  | . | .                  | . | . |
| Vv03g0555          | .                  | .                  | .                  | . | .                  | . | . |
| .                  | .                  | .                  | .                  | . | .                  | . | . |
| .                  | .                  | .                  | .                  | . | .                  | . | . |

|           |   |   |   |   |   |   |   |
|-----------|---|---|---|---|---|---|---|
| Vv03g0556 | . | . | . | . | . | . | . |
| .         | . | . | . | . | . | . | . |
| Vv03g0557 | . | . | . | . | . | . | . |
| .         | . | . | . | . | . | . | . |
| Vv03g0558 | . | . | . | . | . | . | . |
| .         | . | . | . | . | . | . | . |
| Vv03g0559 | . | . | . | . | . | . | . |
| .         | . | . | . | . | . | . | . |
| Vv03g0560 | . | . | . | . | . | . | . |
| .         | . | . | . | . | . | . | . |
| Vv03g0561 | . | . | . | . | . | . | . |
| .         | . | . | . | . | . | . | . |
| Vv03g0562 | . | . | . | . | . | . | . |
| .         | . | . | . | . | . | . | . |
| Vv03g0563 | . | . | . | . | . | . | . |
| .         | . | . | . | . | . | . | . |
| Vv03g0564 | . | . | . | . | . | . | . |
| .         | . | . | . | . | . | . | . |
| Vv03g0565 | . | . | . | . | . | . | . |
| .         | . | . | . | . | . | . | . |
| Vv03g0566 | . | . | . | . | . | . | . |
| .         | . | . | . | . | . | . | . |
| Vv03g0567 | . | . | . | . | . | . | . |
| .         | . | . | . | . | . | . | . |
| Vv03g0568 | . | . | . | . | . | . | . |
| .         | . | . | . | . | . | . | . |
| Vv03g0569 | . | . | . | . | . | . | . |
| .         | . | . | . | . | . | . | . |
| Vv03g0570 | . | . | . | . | . | . | . |
| .         | . | . | . | . | . | . | . |
| Vv03g0571 | . | . | . | . | . | . | . |
| .         | . | . | . | . | . | . | . |
| Vv03g0572 | . | . | . | . | . | . | . |
| .         | . | . | . | . | . | . | . |

|                    |              |                    |                    |                    |        |   |   |
|--------------------|--------------|--------------------|--------------------|--------------------|--------|---|---|
| Vv03g0573          | .            | .                  | .                  | .                  | .      | . | . |
| .                  | .            | .                  | .                  | .                  | .      | . | . |
| Vv03g0574          | .            | Gorai.002G214600.1 | .                  | Gorai.005G264100.1 | .      | . | . |
| .                  | .            | .                  | Vv18g0962          | Tc08_g001260       | .      | . | . |
| .                  | .            | .                  | Gorai.010G015700.1 | .                  | .      | . | . |
| Vv03g0575          | .            | .                  | Gorai.005G240900.1 | .                  | .      | . | . |
| .                  | .            | .                  | .                  | .                  | .      | . | . |
| Vv03g0576          | Tc02_g008160 | .                  | Gorai.013G040000.1 | .                  | .      | . | . |
| Gorai.002G006500.1 | .            | .                  | Gorai.012G150900.1 | .                  | .      | . | . |
| .                  | .            | .                  | .                  | .                  | .      | . | . |
| Vv03g0577          | .            | .                  | .                  | .                  | .      | . | . |
| .                  | .            | .                  | .                  | .                  | .      | . | . |
| Vv03g0578          | Tc02_g008170 | .                  | .                  | .                  | .      | . | . |
| Vv18g0961          | Tc08_g001250 | .                  | .                  | Gorai.005G105400.1 | .      | . | . |
| Gorai.009G207400.1 | .            | .                  | .                  | .                  | .      | . | . |
| Vv03g0579          | .            | .                  | .                  | .                  | .      | . | . |
| .                  | .            | .                  | .                  | .                  | .      | . | . |
| Vv03g0580          | Tc02_g008190 | .                  | Gorai.013G040100.1 | .                  | .      | . | . |
| .                  | .            | .                  | .                  | .                  | .      | . | . |
| Vv03g0581          | .            | .                  | .                  | .                  | .      | . | . |
| .                  | .            | .                  | .                  | .                  | .      | . | . |
| Vv03g0582          | .            | .                  | .                  | .                  | .      | . | . |
| .                  | .            | .                  | .                  | .                  | .      | . | . |
| Vv03g0583          | .            | .                  | .                  | .                  | .      | . | . |
| .                  | .            | .                  | .                  | .                  | .      | . | . |
| Vv03g0584          | Tc02_g008200 | .                  | Gorai.013G040200.1 | .                  | .      | . | . |
| Gorai.008G026900.1 | .            | .                  | Gorai.012G150800.1 | .                  | .      | . | . |
| .                  | .            | .                  | .                  | .                  | .      | . | . |
| Vv03g0585          | Tc02_g008210 | .                  | .                  | .                  | Gorai. | . | . |
| 008G026800.1       | .            | .                  | .                  | .                  | .      | . | . |
| .                  | .            | .                  | .                  | .                  | .      | . | . |
| Vv03g0586          | Tc02_g008220 | .                  | Gorai.013G040300.1 | .                  | .      | . | . |
| Gorai.008G026700.1 | .            | .                  | Gorai.012G150700.1 | .                  | .      | . | . |
| .                  | .            | .                  | .                  | .                  | .      | . | . |
| .                  | .            | .                  | .                  | .                  | .      | . | . |
| Vv03g0587          | .            | .                  | .                  | .                  | .      | . | . |
| Vv18g0956          | Tc08_g001210 | .                  | Gorai.005G105200.1 | .                  | .      | . | . |

|                    |   |   |   |   |   |                    |   |
|--------------------|---|---|---|---|---|--------------------|---|
| Gorai.009G207800.1 | . | . | . | . | . | .                  | . |
| Vv03g0588          | . | . | . | . | . | .                  | . |
| Vv03g0589          | . | . | . | . | . | .                  | . |
| Vv03g0590          | . | . | . | . | . | .                  | . |
| Vv03g0591          | . | . | . | . | . | Gorai.008G026500.1 | . |
| Vv03g0592          | . | . | . | . | . | .                  | . |
| Vv03g0593          | . | . | . | . | . | .                  | . |
| Vv03g0594          | . | . | . | . | . | .                  | . |
| Vv03g0595          | . | . | . | . | . | .                  | . |
| Vv03g0596          | . | . | . | . | . | .                  | . |
| Vv03g0597          | . | . | . | . | . | .                  | . |
| Vv03g0598          | . | . | . | . | . | .                  | . |
| Vv03g0599          | . | . | . | . | . | .                  | . |
| Vv03g0600          | . | . | . | . | . | .                  | . |
| Vv03g0601          | . | . | . | . | . | .                  | . |
| Vv03g0602          | . | . | . | . | . | .                  | . |
| Vv03g0603          | . | . | . | . | . | .                  | . |

|                    |              |                    |   |                    |   |   |   |
|--------------------|--------------|--------------------|---|--------------------|---|---|---|
| Vv03g0604          | .            | .                  | . | .                  | . | . | . |
| .                  | .            | .                  | . | .                  | . | . | . |
| Vv03g0605          | .            | .                  | . | .                  | . | . | . |
| .                  | .            | .                  | . | .                  | . | . | . |
| Vv03g0606          | .            | .                  | . | .                  | . | . | . |
| .                  | .            | .                  | . | .                  | . | . | . |
| Vv03g0607          | Tc02_g008250 | .                  | . | .                  | . | . | . |
| .                  | .            | .                  | . | .                  | . | . | . |
| Vv03g0608          | .            | .                  | . | .                  | . | . | . |
| .                  | .            | .                  | . | .                  | . | . | . |
| Vv03g0609          | Tc02_g008260 | .                  | . | Gorai.002G006700.1 | . | . | . |
| .                  | .            | .                  | . | .                  | . | . | . |
| Vv03g0610          | Tc02_g008270 | .                  | . | Gorai.002G006800.1 | . | . | . |
| .                  | .            | .                  | . | .                  | . | . | . |
| Vv03g0611          | Tc02_g008280 | .                  | . | .                  | . | . | . |
| .                  | .            | .                  | . | .                  | . | . | . |
| Vv03g0612          | .            | .                  | . | .                  | . | . | . |
| .                  | .            | .                  | . | .                  | . | . | . |
| Vv03g0613          | Tc02_g008310 | Gorai.013G040500.1 | . | .                  | . | . | . |
| .                  | .            | .                  | . | .                  | . | . | . |
| Vv03g0614          | Tc02_g008320 | .                  | . | Gorai.             | . | . | . |
| 008G026400.1       | .            | .                  | . | .                  | . | . | . |
| .                  | .            | .                  | . | .                  | . | . | . |
| Vv03g0615          | .            | .                  | . | .                  | . | . | . |
| .                  | .            | .                  | . | .                  | . | . | . |
| Vv03g0616          | Tc02_g008330 | .                  | . | Gorai.002G006900.1 | . | . | . |
| .                  | .            | .                  | . | .                  | . | . | . |
| Vv03g0617          | Tc02_g008350 | .                  | . | .                  | . | . | . |
| .                  | .            | .                  | . | .                  | . | . | . |
| Vv03g0618          | Tc02_g008360 | Gorai.013G040600.1 | . | .                  | . | . | . |
| Gorai.008G026300.1 | .            | Gorai.012G150500.1 | . | .                  | . | . | . |
| .                  | .            | .                  | . | .                  | . | . | . |
| Vv03g0619          | Tc02_g008370 | Gorai.013G040700.1 | . | .                  | . | . | . |
| Gorai.008G026200.1 | .            | .                  | . | .                  | . | . | . |
| .                  | .            | .                  | . | .                  | . | . | . |
| .                  | .            | .                  | . | .                  | . | . | . |

|                    |              |                    |              |                    |   |
|--------------------|--------------|--------------------|--------------|--------------------|---|
| Vv03g0620          | Tc02_g008380 | .                  | .            | .                  | . |
| Gorai.012G150400.1 | .            | .                  | .            | .                  | . |
| .                  | .            | .                  | .            | .                  | . |
| Vv03g0621          | Tc02_g008400 | Gorai.013G041000.1 | Gorai.       | .                  | . |
| 005G240200.1       | .            | .                  | .            | .                  | . |
| .                  | .            | .                  | .            | .                  | . |
| .                  | .            | .                  | .            | .                  | . |
| Vv03g0622          | Tc02_g008410 | .                  | .            | Gorai.002G007100.1 | . |
| .                  | .            | .                  | .            | .                  | . |
| .                  | .            | .                  | .            | .                  | . |
| Vv03g0623          | .            | .                  | .            | Gorai.008G025800.1 | . |
| .                  | .            | .                  | .            | .                  | . |
| .                  | .            | .                  | .            | .                  | . |
| Vv03g0624          | Tc02_g008450 | Gorai.013G041200.1 | .            | .                  | . |
| .                  | .            | .                  | .            | .                  | . |
| .                  | .            | .                  | .            | .                  | . |
| Vv03g0625          | .            | .                  | .            | .                  | . |
| .                  | .            | .                  | .            | .                  | . |
| .                  | .            | .                  | .            | .                  | . |
| Vv03g0626          | .            | .                  | .            | Gorai.008G025700.1 | . |
| .                  | .            | .                  | .            | .                  | . |
| .                  | .            | .                  | .            | .                  | . |
| Vv03g0627          | Tc02_g008460 | Gorai.013G041800.1 | .            | .                  | . |
| .                  | .            | Vv18g0944          | Tc08_g001050 | .                  | . |
| .                  | .            | Gorai.010G016700.1 | .            | .                  | . |
| .                  | .            | .                  | .            | .                  | . |
| Vv03g0628          | .            | Gorai.013G042000.1 | .            | .                  | . |
| .                  | .            | .                  | .            | .                  | . |
| .                  | .            | .                  | .            | .                  | . |
| Vv03g0629          | Tc02_g008480 | .                  | .            | .                  | . |
| .                  | .            | .                  | .            | .                  | . |
| .                  | .            | .                  | .            | .                  | . |
| Vv03g0630          | .            | .                  | .            | .                  | . |
| .                  | .            | .                  | .            | .                  | . |
| .                  | .            | .                  | .            | .                  | . |
| Vv03g0631          | Tc02_g008490 | Gorai.013G042100.1 | .            | .                  | . |
| .                  | .            | .                  | .            | .                  | . |
| .                  | .            | .                  | .            | .                  | . |
| Vv03g0632          | .            | .                  | .            | .                  | . |
| .                  | .            | .                  | .            | .                  | . |
| .                  | .            | .                  | .            | .                  | . |
| Vv03g0633          | .            | .                  | .            | .                  | . |
| .                  | .            | .                  | .            | .                  | . |
| .                  | .            | .                  | .            | .                  | . |
| Vv03g0634          | Tc02_g008500 | .                  | .            | .                  | . |
| .                  | .            | .                  | .            | .                  | . |
| .                  | .            | .                  | .            | .                  | . |
| Vv03g0635          | .            | .                  | .            | .                  | . |
| .                  | .            | .                  | .            | .                  | . |
| .                  | .            | .                  | .            | .                  | . |

|                    |                    |                    |                    |
|--------------------|--------------------|--------------------|--------------------|
| Vv03g0636          | Tc02_g008530       | Gorai.013G042200.1 | .                  |
| Gorai.002G007300.1 | Gorai.008G025600.1 | .                  | Vv18g0939          |
| Tc08_g001010       | .                  | Gorai.005G104600.1 | Gorai.             |
| 009G209200.1       | .                  | .                  | .                  |
| .                  | .                  | .                  | .                  |
| Vv03g0637          | Tc02_g008550       | .                  | .                  |
| .                  | .                  | .                  | .                  |
| .                  | .                  | .                  | .                  |
| Vv03g0638          | Tc02_g008560       | .                  | .                  |
| .                  | .                  | .                  | .                  |
| .                  | .                  | .                  | .                  |
| Vv03g0639          | Tc02_g008580       | Gorai.013G042300.1 | .                  |
| Gorai.008G025400.1 | .                  | .                  | .                  |
| .                  | .                  | .                  | .                  |
| .                  | .                  | .                  | .                  |
| Vv03g0640          | Tc02_g008590       | Gorai.013G042400.1 | .                  |
| Gorai.008G025300.1 | .                  | Vv18g0932          | .                  |
| Tc08_g000920       | .                  | .                  | .                  |
| .                  | .                  | .                  | .                  |
| Vv03g0641          | .                  | .                  | .                  |
| .                  | .                  | .                  | .                  |
| .                  | .                  | .                  | .                  |
| Vv03g0642          | .                  | .                  | .                  |
| .                  | .                  | .                  | Vv04g0564          |
| .                  | .                  | .                  | .                  |
| Vv03g0643          | Tc02_g008600       | Gorai.013G042500.1 | .                  |
| Gorai.008G025200.1 | .                  | .                  | .                  |
| .                  | .                  | Vv04g0563          | .                  |
| .                  | .                  | .                  | .                  |
| Vv03g0644          | .                  | .                  | .                  |
| .                  | .                  | .                  | Vv04g0562          |
| .                  | .                  | .                  | .                  |
| Vv03g0645          | Tc02_g008610       | .                  | .                  |
| .                  | .                  | .                  | .                  |
| Vv04g0561          | .                  | .                  | .                  |
| Vv03g0646          | .                  | .                  | .                  |
| .                  | .                  | .                  | Vv04g0560          |
| .                  | .                  | .                  | .                  |
| Vv03g0647          | Tc02_g008620       | .                  | Gorai.005G239400.1 |
| .                  | .                  | .                  | .                  |
| .                  | .                  | .                  | .                  |
| Vv03g0648          | .                  | Gorai.005G239200.1 | .                  |
| .                  | .                  | .                  | .                  |
| .                  | .                  | .                  | .                  |
| Vv04g0558          | .                  | .                  | .                  |
| Gorai.010G114500.1 | .                  | .                  | .                  |
| Vv03g0649          | Tc02_g008630       | Gorai.005G239100.1 | .                  |
| .                  | Vv18g0905          | Tc08_g000810       | .                  |
| Gorai.005G103700.1 | Gorai.009G210700.1 | .                  | .                  |
| .                  | .                  | .                  | .                  |
| Vv03g0650          | .                  | .                  | .                  |



|                    |                    |                    |                    |                    |        |   |
|--------------------|--------------------|--------------------|--------------------|--------------------|--------|---|
| .                  | .                  | .                  | .                  | .                  | .      | . |
| .                  | .                  | .                  | .                  | .                  | .      | . |
| Vv03g0651          | .                  | .                  | Gorai.005G239000.1 | .                  | .      | . |
| .                  | .                  | .                  | .                  | .                  | .      | . |
| Vv04g0556          | .                  | .                  | .                  | .                  | .      | . |
| Vv03g0652          | .                  | .                  | .                  | .                  | .      | . |
| .                  | .                  | .                  | .                  | .                  | .      | . |
| .                  | .                  | .                  | .                  | .                  | .      | . |
| Vv03g0653          | .                  | .                  | .                  | .                  | Gorai. | . |
| 012G150300.1       | .                  | .                  | .                  | .                  | .      | . |
| .                  | .                  | .                  | .                  | .                  | .      | . |
| Vv03g0654          | .                  | .                  | .                  | .                  | .      | . |
| .                  | .                  | .                  | .                  | .                  | .      | . |
| .                  | .                  | .                  | .                  | .                  | .      | . |
| Vv03g0655          | .                  | .                  | .                  | .                  | .      | . |
| .                  | .                  | .                  | .                  | .                  | .      | . |
| .                  | .                  | .                  | .                  | .                  | .      | . |
| Vv03g0656          | .                  | .                  | Gorai.005G238800.1 | Gorai.             | .      | . |
| 002G007500.1       | .                  | .                  | Vv18g0900          | Tc08_g000740       | .      | . |
| .                  | Gorai.009G210900.1 | .                  | .                  | .                  | .      | . |
| .                  | .                  | .                  | .                  | .                  | .      | . |
| Vv03g0657          | .                  | Gorai.013G042700.1 | .                  | Gorai.005G238700.1 | .      | . |
| .                  | .                  | .                  | .                  | .                  | .      | . |
| .                  | .                  | .                  | .                  | .                  | .      | . |
| .                  | .                  | .                  | .                  | .                  | .      | . |
| Vv03g0658          | .                  | .                  | Gorai.005G238600.1 | Gorai.             | .      | . |
| 002G007600.1       | .                  | .                  | Vv18g0898          | Tc08_g000720       | .      | . |
| Gorai.002G128700.1 | .                  | .                  | .                  | .                  | .      | . |
| .                  | .                  | .                  | .                  | .                  | .      | . |
| Vv03g0659          | .                  | .                  | .                  | .                  | .      | . |
| .                  | .                  | .                  | .                  | .                  | .      | . |
| .                  | .                  | .                  | .                  | .                  | .      | . |
| Vv03g0660          | .                  | Gorai.013G042800.1 | .                  | Gorai.             | .      | . |
| 002G007700.1       | .                  | .                  | .                  | .                  | .      | . |
| .                  | .                  | .                  | .                  | .                  | .      | . |
| .                  | .                  | .                  | .                  | .                  | .      | . |
| Vv03g0661          | .                  | .                  | Gorai.005G238500.1 | .                  | .      | . |
| .                  | .                  | .                  | .                  | .                  | .      | . |
| .                  | .                  | .                  | .                  | .                  | .      | . |
| Vv03g0662          | .                  | .                  | .                  | .                  | .      | . |
| .                  | .                  | .                  | .                  | .                  | .      | . |
| .                  | .                  | .                  | .                  | .                  | .      | . |
| Vv03g0663          | .                  | .                  | .                  | .                  | .      | . |
| .                  | .                  | .                  | .                  | .                  | .      | . |
| .                  | .                  | .                  | .                  | .                  | .      | . |
| Vv03g0664          | .                  | Gorai.013G043100.1 | .                  | .                  | .      | . |
| .                  | .                  | .                  | .                  | .                  | .      | . |
| .                  | .                  | .                  | .                  | .                  | .      | . |
| Vv03g0665          | .                  | .                  | .                  | .                  | .      | . |
| .                  | .                  | .                  | .                  | .                  | .      | . |

|                    |                    |                    |        |   |
|--------------------|--------------------|--------------------|--------|---|
| Vv03g0666          | Tc02_g008660       | Gorai.002G174700.1 | .      | . |
| .                  | .                  | .                  | .      | . |
| Vv03g0667          | .                  | .                  | .      | . |
| .                  | .                  | .                  | .      | . |
| Vv03g0668          | Gorai.002G174600.1 | .                  | .      | . |
| Gorai.012G150200.1 | .                  | .                  | .      | . |
| .                  | .                  | .                  | .      | . |
| Vv03g0669          | Gorai.002G174500.1 | .                  | .      | . |
| .                  | .                  | .                  | .      | . |
| Vv03g0670          | Tc02_g008700       | .                  | .      | . |
| .                  | .                  | .                  | .      | . |
| Vv03g0671          | Tc02_g008710       | Gorai.002G172400.1 | .      | . |
| .                  | .                  | .                  | .      | . |
| Vv03g0672          | Tc02_g008720       | Gorai.013G043500.1 | .      | . |
| .                  | .                  | .                  | .      | . |
| Vv03g0673          | Tc02_g008730       | Gorai.002G170600.1 | Gorai. | . |
| 005G238300.1       | Gorai.002G007900.1 | .                  | .      | . |
| .                  | .                  | .                  | .      | . |
| Vv03g0674          | Tc02_g008740       | Gorai.005G238200.1 | .      | . |
| Gorai.002G008000.1 | .                  | .                  | .      | . |
| .                  | .                  | .                  | .      | . |
| Vv03g0675          | Tc02_g008750       | Gorai.005G238100.1 | .      | . |
| Gorai.002G008100.1 | .                  | Vv18g0883          | .      | . |
| Tc08_g000520       | .                  | Gorai.010G019700.1 | .      | . |
| .                  | .                  | .                  | .      | . |
| Vv03g0676          | Gorai.013G043700.1 | Gorai.005G238000.1 | .      | . |
| .                  | Gorai.008G025100.1 | .                  | .      | . |
| .                  | .                  | .                  | .      | . |
| Vv03g0677          | .                  | .                  | .      | . |
| .                  | .                  | .                  | .      | . |
| Vv03g0678          | .                  | .                  | .      | . |
| .                  | .                  | .                  | .      | . |
| Vv03g0679          | .                  | .                  | .      | . |
| .                  | .                  | .                  | .      | . |
| Vv03g0680          | .                  | .                  | .      | . |
| .                  | .                  | .                  | .      | . |

|                    |                    |                    |           |   |   |   |   |
|--------------------|--------------------|--------------------|-----------|---|---|---|---|
| Vv03g0681          | .                  | .                  | .         | . | . | . | . |
| .                  | .                  | .                  | .         | . | . | . | . |
| Vv03g0682          | .                  | .                  | .         | . | . | . | . |
| .                  | .                  | .                  | .         | . | . | . | . |
| Vv03g0683          | .                  | .                  | .         | . | . | . | . |
| .                  | .                  | .                  | .         | . | . | . | . |
| Vv03g0684          | .                  | .                  | .         | . | . | . | . |
| .                  | .                  | .                  | .         | . | . | . | . |
| Vv03g0685          | Tc02_g008760       | Gorai.013G043800.1 | .         | . | . | . | . |
|                    | Gorai.008G025000.1 | .                  | .         | . | . | . | . |
| .                  | .                  | .                  | .         | . | . | . | . |
| Vv03g0686          | Tc02_g008770       | Gorai.013G044100.1 | Gorai.    | . | . | . | . |
| 005G237800.1       | .                  | .                  | .         | . | . | . | . |
| .                  | .                  | .                  | .         | . | . | . | . |
| Vv03g0687          | Tc02_g008790       | Gorai.013G044200.1 | .         | . | . | . | . |
| .                  | .                  | .                  | .         | . | . | . | . |
| Vv03g0688          | Tc02_g008800       | Gorai.013G044300.1 | .         | . | . | . | . |
| Gorai.002G008200.1 | Gorai.008G024900.1 | .                  | .         | . | . | . | . |
| .                  | .                  | .                  | .         | . | . | . | . |
| Vv03g0689          | .                  | .                  | .         | . | . | . | . |
| .                  | .                  | .                  | .         | . | . | . | . |
| Vv03g0690          | Tc02_g008830       | Gorai.005G237500.1 | .         | . | . | . | . |
| .                  | .                  | .                  | .         | . | . | . | . |
| Vv03g0691          | Tc02_g008840       | Gorai.013G044500.1 | Gorai.    | . | . | . | . |
| 005G237400.1       | Gorai.008G024700.1 | .                  | Vv18g0869 | . | . | . | . |
|                    | Tc08_g000390       | Gorai.005G102300.1 | Gorai.    | . | . | . | . |
| 009G212600.1       | .                  | Vv04g0536          | .         | . | . | . | . |
|                    | Gorai.004G274100.1 | .                  | .         | . | . | . | . |
| Vv03g0692          | Tc02_g008860       | Gorai.013G044600.1 | .         | . | . | . | . |
| .                  | .                  | .                  | .         | . | . | . | . |
| Vv03g0693          | Tc02_g008870       | .                  | Gorai.    | . | . | . | . |
| 008G024600.1       | .                  | .                  | .         | . | . | . | . |
| .                  | .                  | .                  | .         | . | . | . | . |
| Vv03g0694          | Tc02_g008880       | Gorai.005G237300.1 | .         | . | . | . | . |
|                    | Gorai.008G024500.1 | .                  | .         | . | . | . | . |
| .                  | .                  | .                  | .         | . | . | . | . |
| Vv03g0695          | .                  | .                  | .         | . | . | . | . |

|                    |                    |                    |   |   |   |        |   |
|--------------------|--------------------|--------------------|---|---|---|--------|---|
| .                  | .                  | .                  | . | . | . | .      | . |
| .                  | .                  | .                  | . | . | . | .      | . |
| Vv03g0696          | Tc02_g008890       | Gorai.013G044700.1 | . | . | . | .      | . |
| .                  | Gorai.012G150000.1 | .                  | . | . | . | .      | . |
| .                  | .                  | .                  | . | . | . | .      | . |
| .                  | .                  | .                  | . | . | . | .      | . |
| Vv03g0697          | .                  | .                  | . | . | . | .      | . |
| .                  | .                  | .                  | . | . | . | .      | . |
| .                  | .                  | .                  | . | . | . | .      | . |
| Vv03g0698          | Tc02_g008900       | .                  | . | . | . | Gorai. | . |
| 008G024400.1       | .                  | .                  | . | . | . | .      | . |
| .                  | .                  | .                  | . | . | . | .      | . |
| Vv03g0699          | Tc02_g008910       | .                  | . | . | . | .      | . |
| .                  | .                  | .                  | . | . | . | .      | . |
| .                  | .                  | .                  | . | . | . | .      | . |
| Vv03g0700          | Tc02_g008920       | Gorai.013G044800.1 | . | . | . | .      | . |
| Gorai.008G024300.1 | .                  | .                  | . | . | . | .      | . |
| .                  | .                  | .                  | . | . | . | .      | . |
| .                  | .                  | .                  | . | . | . | .      | . |
| Vv03g0701          | Tc02_g008940       | Gorai.013G044900.1 | . | . | . | .      | . |
| Gorai.008G024200.1 | .                  | Vv07g1118          | . | . | . | .      | . |
| Tc01_g005230       | .                  | Gorai.007G214400.1 | . | . | . | .      | . |
| .                  | .                  | .                  | . | . | . | .      | . |
| Vv03g0702          | Tc02_g008950       | Gorai.013G045000.1 | . | . | . | Gorai. | . |
| 005G237200.1       | .                  | .                  | . | . | . | .      | . |
| .                  | .                  | .                  | . | . | . | .      | . |
| .                  | .                  | .                  | . | . | . | .      | . |
| Vv03g0703          | Tc02_g008960       | Gorai.013G045100.1 | . | . | . | .      | . |
| .                  | .                  | .                  | . | . | . | .      | . |
| .                  | .                  | .                  | . | . | . | .      | . |
| Vv03g0704          | Tc02_g008970       | Gorai.013G045200.1 | . | . | . | .      | . |
| Gorai.008G024100.1 | .                  | Gorai.012G149900.1 | . | . | . | .      | . |
| .                  | .                  | .                  | . | . | . | .      | . |
| .                  | .                  | .                  | . | . | . | .      | . |
| Vv03g0705          | .                  | .                  | . | . | . | .      | . |
| .                  | .                  | .                  | . | . | . | .      | . |
| .                  | .                  | .                  | . | . | . | .      | . |
| Vv03g0706          | Tc02_g008990       | Gorai.013G045300.1 | . | . | . | Gorai. | . |
| 005G237100.1       | Gorai.008G024000.1 | Gorai.012G149800.1 | . | . | . | .      | . |
| Vv07g1105          | Tc01_g005290       | .                  | . | . | . | .      | . |
| .                  | .                  | .                  | . | . | . | .      | . |
| Vv03g0707          | .                  | .                  | . | . | . | .      | . |
| .                  | .                  | .                  | . | . | . | .      | . |
| .                  | .                  | .                  | . | . | . | .      | . |
| Vv03g0708          | Tc02_g009030       | Gorai.013G045400.1 | . | . | . | Gorai. | . |
| 005G236900.1       | Gorai.002G008400.1 | Gorai.012G149700.1 | . | . | . | .      | . |
| .                  | .                  | .                  | . | . | . | .      | . |
| .                  | .                  | .                  | . | . | . | .      | . |
| Vv03g0709          | .                  | .                  | . | . | . | .      | . |
| .                  | .                  | .                  | . | . | . | .      | . |

|                           |                    |                    |        |
|---------------------------|--------------------|--------------------|--------|
| Vv03g0710<br>005G236800.1 | Tc02_g009040       | Gorai.013G045500.1 | Gorai. |
| .                         | .                  | .                  | .      |
| .                         | .                  | .                  | .      |
| Vv03g0711                 | Tc02_g009050       | Gorai.013G045700.1 | .      |
| .                         | Vv07g1095          | Tc01_g005390       | .      |
| Gorai.007G215700.1        | .                  | .                  | .      |
| .                         | .                  | .                  | .      |
| Vv03g0712<br>005G236700.1 | Tc02_g009060       | Gorai.013G045800.1 | Gorai. |
| .                         | .                  | Vv07g1094          | .      |
| .                         | Gorai.007G215800.1 | .                  | .      |
| .                         | .                  | .                  | .      |
| Vv03g0713<br>005G236600.1 | Tc02_g009070       | Gorai.013G045900.1 | Gorai. |
| .                         | .                  | Vv07g1088          | .      |
| .                         | .                  | .                  | .      |
| .                         | .                  | .                  | .      |
| Vv03g0714<br>005G236500.1 | Tc02_g009080       | Gorai.013G046000.1 | Gorai. |
| .                         | .                  | .                  | .      |
| .                         | .                  | .                  | .      |
| Vv03g0715                 | .                  | .                  | .      |
| .                         | .                  | .                  | .      |
| .                         | .                  | .                  | .      |
| Vv03g0716                 | .                  | .                  | .      |
| .                         | .                  | .                  | .      |
| .                         | .                  | .                  | .      |
| Vv03g0717                 | Tc02_g009130       | Gorai.013G046100.1 | .      |
| Gorai.008G023800.1        | .                  | .                  | .      |
| .                         | .                  | .                  | .      |
| .                         | .                  | .                  | .      |
| Vv03g0718                 | Tc02_g009160       | Gorai.013G046200.1 | .      |
| .                         | .                  | .                  | .      |
| .                         | .                  | .                  | .      |
| Vv03g0719                 | Tc02_g009190       | Gorai.005G236300.1 | .      |
| .                         | Vv07g1079          | Tc01_g005530       | Gorai. |
| 007G055100.1              | Gorai.007G216600.1 | .                  | .      |
| .                         | .                  | .                  | .      |
| Vv03g0720                 | Tc02_g009220       | Gorai.005G236100.1 | .      |
| .                         | .                  | .                  | .      |
| .                         | .                  | .                  | .      |
| Vv03g0721                 | .                  | .                  | .      |
| Vv07g1073                 | .                  | Gorai.007G216900.1 | .      |
| .                         | .                  | .                  | .      |
| Vv03g0722                 | Tc02_g009260       | Gorai.005G235900.1 | .      |
| .                         | Vv18g0822          | Tc08_g000020       | Gorai. |
| 002G133800.1              | Gorai.009G214900.1 | .                  | Gorai. |
| 010G022700.1              | Vv07g1072          | Tc01_g005600       | .      |
| .                         | .                  | .                  | .      |
| Vv03g0723                 | Tc02_g009270       | Gorai.005G235800.1 | .      |

|                    |                    |                    |           |   |
|--------------------|--------------------|--------------------|-----------|---|
| Gorai.002G008700.1 | Gorai.008G023600.1 | .                  | .         | . |
| .                  | .                  | .                  | Vv07g1069 | . |
| Tc01_g005630       | Gorai.007G055500.1 | .                  | .         | . |
| Vv03g0724          | Tc02_g009280       | Gorai.013G046300.1 | Gorai.    | . |
| 005G235700.1       | Gorai.002G008800.1 | .                  | Vv18g0820 | . |
| .                  | .                  | Gorai.009G215200.1 | .         | . |
| Gorai.010G022800.1 | .                  | .                  | .         | . |
| .                  | .                  | .                  | .         | . |
| Vv03g0725          | Tc02_g009300       | Gorai.013G046400.1 | Gorai.    | . |
| 005G235600.1       | .                  | Gorai.012G149300.1 | Vv18g0788 | . |
| .                  | .                  | Gorai.009G216800.1 | .         | . |
| Gorai.010G024100.1 | Vv07g1065          | Tc01_g005650       | .         | . |
| .                  | Gorai.003G027100.1 | Gorai.011G106700.1 | .         | . |
| Vv03g0726          | Tc02_g009310       | .                  | Gorai.    | . |
| 008G023500.1       | Gorai.012G149200.1 | .                  | .         | . |
| .                  | .                  | .                  | .         | . |
| .                  | .                  | .                  | .         | . |
| Vv03g0727          | Tc02_g009320       | .                  | .         | . |
| .                  | .                  | .                  | .         | . |
| .                  | .                  | .                  | .         | . |
| Vv03g0728          | Tc02_g009330       | Gorai.013G046500.1 | .         | . |
| Gorai.002G008900.1 | .                  | .                  | .         | . |
| .                  | .                  | .                  | .         | . |
| .                  | .                  | .                  | .         | . |
| Vv03g0729          | Tc02_g009340       | .                  | .         | . |
| .                  | .                  | .                  | .         | . |
| .                  | .                  | .                  | .         | . |
| Vv03g0730          | .                  | .                  | .         | . |
| .                  | .                  | .                  | .         | . |
| .                  | .                  | .                  | .         | . |
| Vv03g0731          | Tc02_g009350       | Gorai.013G046600.1 | .         | . |
| Gorai.002G009000.1 | Gorai.008G023400.1 | .                  | .         | . |
| .                  | .                  | .                  | .         | . |
| .                  | .                  | .                  | .         | . |
| Vv03g0732          | Tc02_g009360       | Gorai.013G046700.1 | .         | . |
| Gorai.002G009100.1 | .                  | .                  | .         | . |
| .                  | .                  | .                  | .         | . |
| .                  | .                  | .                  | .         | . |
| Vv03g0733          | Tc02_g009370       | Gorai.005G235500.1 | .         | . |
| .                  | .                  | .                  | .         | . |
| .                  | .                  | .                  | .         | . |
| Vv03g0734          | Tc02_g009390       | Gorai.005G235400.1 | .         | . |
| .                  | .                  | .                  | .         | . |
| .                  | .                  | .                  | .         | . |
| Vv03g0735          | Tc02_g009400       | Gorai.005G235300.1 | .         | . |
| .                  | .                  | .                  | .         | . |
| .                  | .                  | .                  | .         | . |
| Vv03g0736          | Tc02_g009410       | Gorai.013G046900.1 | .         | . |
| Gorai.008G023300.1 | .                  | Gorai.012G149100.1 | .         | . |
| .                  | .                  | .                  | .         | . |
| .                  | .                  | .                  | .         | . |

|                    |              |                    |                    |                    |   |
|--------------------|--------------|--------------------|--------------------|--------------------|---|
| Vv03g0737          | Tc02_g009420 | .                  | .                  | Gorai.002G009200.1 | . |
| .                  | .            | .                  | .                  | .                  | . |
| Vv03g0738          | .            | .                  | .                  | .                  | . |
| .                  | .            | .                  | .                  | .                  | . |
| Vv03g0739          | Tc02_g009430 | Gorai.013G047000.1 | .                  | .                  | . |
| Gorai.008G023200.1 | .            | .                  | .                  | .                  | . |
| .                  | .            | .                  | .                  | .                  | . |
| Vv03g0740          | Tc02_g009440 | Gorai.013G047100.1 | Gorai.             | .                  | . |
| 005G235200.1       | .            | .                  | .                  | .                  | . |
| .                  | .            | .                  | .                  | .                  | . |
| Vv03g0741          | .            | .                  | .                  | .                  | . |
| .                  | .            | .                  | .                  | .                  | . |
| Vv03g0742          | Tc02_g009460 | .                  | Gorai.005G235000.1 | .                  | . |
| .                  | .            | .                  | .                  | .                  | . |
| Vv03g0743          | .            | .                  | .                  | .                  | . |
| .                  | .            | .                  | .                  | .                  | . |
| Vv03g0744          | Tc02_g009470 | .                  | Gorai.005G234900.1 | .                  | . |
| Gorai.002G009300.1 | .            | Gorai.012G149000.1 | .                  | .                  | . |
| .                  | .            | .                  | .                  | .                  | . |
| Vv03g0745          | .            | .                  | .                  | .                  | . |
| .                  | .            | .                  | .                  | .                  | . |
| Vv03g0746          | .            | .                  | Gorai.008G022900.1 | .                  | . |
| .                  | .            | .                  | .                  | .                  | . |
| Vv03g0747          | Tc02_g009480 | .                  | Gorai.002G009400.1 | .                  | . |
| .                  | .            | .                  | .                  | .                  | . |
| Vv03g0748          | Tc02_g009490 | .                  | .                  | .                  | . |
| Vv07g1057          | Tc01_g005730 | .                  | .                  | Gorai.             | . |
| 007G218300.1       | .            | .                  | .                  | .                  | . |
| .                  | .            | .                  | .                  | .                  | . |
| Vv03g0749          | .            | .                  | .                  | .                  | . |
| .                  | .            | .                  | .                  | .                  | . |
| Vv03g0750          | .            | .                  | .                  | .                  | . |
| .                  | .            | .                  | .                  | .                  | . |
| Vv03g0751          | Tc02_g009500 | .                  | Gorai.005G234800.1 | .                  | . |
| Gorai.008G022800.1 | .            | .                  | .                  | .                  | . |
| .                  | .            | .                  | .                  | .                  | . |

|                    |              |                    |           |                    |   |
|--------------------|--------------|--------------------|-----------|--------------------|---|
| Vv03g0752          | Tc02_g009510 | .                  | .         | Gorai.002G009500.1 | . |
| .                  | .            | .                  | .         | .                  | . |
| Vv03g0753          | .            | .                  | .         | .                  | . |
| .                  | .            | .                  | .         | .                  | . |
| Vv03g0754          | .            | .                  | .         | .                  | . |
| .                  | .            | .                  | .         | .                  | . |
| Vv03g0755          | Tc02_g009530 | .                  | .         | Gorai.005G234700.1 | . |
| .                  | .            | .                  | .         | .                  | . |
| Vv03g0756          | .            | .                  | .         | .                  | . |
| .                  | .            | .                  | .         | .                  | . |
| Vv03g0757          | Tc02_g009540 | .                  | .         | Gorai.005G234600.1 | . |
| .                  | .            | .                  | .         | .                  | . |
| Vv03g0758          | .            | .                  | .         | .                  | . |
| .                  | .            | .                  | .         | .                  | . |
| Vv03g0759          | Tc02_g009910 | Gorai.013G049000.1 | .         | Gorai.             | . |
| 005G233000.1       | .            | .                  | Vv18g0765 | .                  | . |
| .                  | .            | .                  | Vv07g1000 | .                  | . |
| Tc01_g006140       | .            | Gorai.007G190900.1 | .         | .                  | . |
| Vv03g0760          | Tc02_g009920 | Gorai.013G049100.1 | .         | .                  | . |
| Gorai.008G021100.1 | .            | .                  | .         | .                  | . |
| .                  | .            | .                  | .         | .                  | . |
| Vv03g0761          | .            | Gorai.013G049200.1 | .         | .                  | . |
| .                  | .            | .                  | .         | .                  | . |
| Vv03g0762          | Tc02_g009930 | .                  | .         | Gorai.002G009800.1 | . |
| .                  | .            | .                  | .         | .                  | . |
| Vv03g0763          | .            | .                  | .         | Gorai.002G009900.1 | . |
| .                  | .            | .                  | .         | .                  | . |
| Vv07g0994          | Tc01_g006200 | .                  | .         | Gorai.             | . |
| 007G190600.1       | .            | .                  | .         | .                  | . |
| Vv03g0764          | .            | .                  | .         | .                  | . |
| .                  | .            | .                  | .         | .                  | . |
| Vv03g0765          | .            | .                  | .         | .                  | . |
| .                  | .            | .                  | .         | .                  | . |
| Vv03g0766          | .            | .                  | .         | .                  | . |
| .                  | .            | .                  | .         | .                  | . |
| Vv03g0767          | Tc02_g009960 | Gorai.013G049300.1 | .         | .                  | . |



|                    |                    |                    |                    |                    |   |        |   |
|--------------------|--------------------|--------------------|--------------------|--------------------|---|--------|---|
| .                  | .                  | .                  | .                  | .                  | . | .      | . |
| .                  | .                  | .                  | .                  | .                  | . | .      | . |
| Vv03g0768          | Tc02_g009970       | .                  | .                  | .                  | . | Gorai. | . |
| 008G021000.1       | .                  | .                  | .                  | .                  | . | .      | . |
| .                  | .                  | .                  | .                  | .                  | . | .      | . |
| Vv03g0769          | Tc02_g009990       | .                  | .                  | .                  | . | Gorai. | . |
| 008G020900.1       | .                  | .                  | .                  | .                  | . | .      | . |
| .                  | .                  | .                  | .                  | .                  | . | .      | . |
| Vv03g0770          | .                  | .                  | .                  | .                  | . | .      | . |
| .                  | .                  | .                  | .                  | .                  | . | .      | . |
| Vv03g0771          | Tc02_g010000       | Gorai.013G049500.1 | .                  | .                  | . | .      | . |
| .                  | Vv18g0755          | .                  | .                  | .                  | . | .      | . |
| Gorai.009G218300.1 | .                  | .                  | .                  | .                  | . | .      | . |
| .                  | .                  | .                  | .                  | .                  | . | .      | . |
| Vv03g0772          | Tc02_g010010       | .                  | .                  | Gorai.002G010000.1 | . | .      | . |
| .                  | .                  | .                  | .                  | .                  | . | .      | . |
| .                  | Vv07g0985          | .                  | .                  | Gorai.008G080900.1 | . | .      | . |
| Gorai.007G221800.1 | Gorai.003G029100.1 | .                  | .                  | .                  | . | .      | . |
| Vv03g0773          | Tc02_g010020       | .                  | .                  | .                  | . | .      | . |
| Gorai.012G148400.1 | .                  | .                  | .                  | .                  | . | .      | . |
| .                  | .                  | .                  | .                  | .                  | . | .      | . |
| Vv03g0774          | Tc02_g010050       | Gorai.013G049600.1 | .                  | .                  | . | .      | . |
| .                  | Gorai.012G148200.1 | .                  | .                  | .                  | . | .      | . |
| .                  | .                  | .                  | .                  | .                  | . | .      | . |
| Vv03g0775          | Tc02_g010060       | .                  | Gorai.005G232800.1 | .                  | . | .      | . |
| .                  | .                  | .                  | .                  | .                  | . | .      | . |
| .                  | .                  | .                  | .                  | .                  | . | .      | . |
| Vv03g0776          | .                  | .                  | .                  | .                  | . | .      | . |
| .                  | .                  | .                  | .                  | .                  | . | .      | . |
| Vv03g0777          | Tc02_g010090       | Gorai.013G049900.1 | Gorai.             | .                  | . | .      | . |
| 005G232600.1       | .                  | Vv18g0752          | .                  | .                  | . | .      | . |
| Gorai.005G099700.1 | Gorai.009G218600.1 | .                  | .                  | .                  | . | .      | . |
| Gorai.010G025000.1 | .                  | .                  | .                  | .                  | . | .      | . |
| .                  | .                  | .                  | .                  | .                  | . | .      | . |
| Vv03g0778          | Tc02_g010100       | .                  | Gorai.005G232500.1 | .                  | . | .      | . |
| .                  | Vv18g0751          | .                  | .                  | .                  | . | .      | . |
| Gorai.009G218800.1 | .                  | Gorai.010G025100.1 | Vv07g0982          | .                  | . | .      | . |
| Tc01_g006300       | Gorai.007G056300.1 | Gorai.008G081100.1 | .                  | .                  | . | .      | . |
| Gorai.007G222000.1 | .                  | .                  | .                  | .                  | . | .      | . |
| Vv03g0779          | Tc02_g010110       | Gorai.013G050000.1 | Gorai.             | .                  | . | .      | . |
| 005G232400.1       | .                  | .                  | .                  | .                  | . | .      | . |
| .                  | .                  | Vv07g0973          | Tc01_g006380       | .                  | . | .      | . |
| .                  | Gorai.007G222400.1 | Gorai.003G039100.1 | .                  | .                  | . | .      | . |
| Vv03g0780          | Tc02_g010120       | Gorai.013G050100.1 | Gorai.             | .                  | . | .      | . |
| 005G232300.1       | Gorai.008G020700.1 | .                  | .                  | .                  | . | .      | . |
| .                  | .                  | .                  | .                  | .                  | . | .      | . |
| .                  | .                  | .                  | .                  | .                  | . | .      | . |

|                    |                    |                    |                    |   |   |           |   |
|--------------------|--------------------|--------------------|--------------------|---|---|-----------|---|
| Vv03g0781          | .                  | .                  | .                  | . | . | .         | . |
| .                  | .                  | .                  | .                  | . | . | .         | . |
| Vv03g0782          | Tc02_g010130       | .                  | .                  | . | . | .         | . |
| Gorai.012G147700.1 | .                  | .                  | .                  | . | . | .         | . |
| Vv03g0783          | .                  | .                  | .                  | . | . | .         | . |
| .                  | .                  | .                  | .                  | . | . | .         | . |
| Vv03g0784          | Tc02_g010140       | Gorai.013G050200.1 | Gorai.             | . | . | .         | . |
| 005G232100.1       | .                  | .                  | .                  | . | . | .         | . |
| .                  | .                  | .                  | .                  | . | . | .         | . |
| Vv03g0785          | .                  | .                  | .                  | . | . | .         | . |
| .                  | .                  | .                  | .                  | . | . | .         | . |
| Vv03g0786          | Tc02_g010150       | .                  | Gorai.005G232000.1 | . | . | .         | . |
| Gorai.002G010200.1 | Gorai.008G020600.1 | .                  | .                  | . | . | .         | . |
| .                  | .                  | .                  | .                  | . | . | .         | . |
| Vv03g0787          | Tc02_g010160       | .                  | Gorai.005G231900.1 | . | . | .         | . |
| .                  | .                  | .                  | .                  | . | . | .         | . |
| Vv03g0788          | Tc02_g010170       | Gorai.013G050300.1 | Gorai.             | . | . | .         | . |
| 005G231800.1       | Gorai.002G010300.1 | .                  | .                  | . | . | .         | . |
| .                  | .                  | .                  | .                  | . | . | .         | . |
| Vv03g0789          | Tc02_g010190       | .                  | .                  | . | . | .         | . |
| Gorai.012G147500.1 | .                  | .                  | .                  | . | . | .         | . |
| .                  | .                  | .                  | .                  | . | . | .         | . |
| Vv03g0790          | Tc02_g010210       | Gorai.013G050400.1 | .                  | . | . | .         | . |
| .                  | Vv18g0745          | .                  | Gorai.             | . | . | .         | . |
| 005G099600.1       | Gorai.009G219300.1 | Gorai.009G277100.1 | .                  | . | . | .         | . |
| .                  | .                  | .                  | .                  | . | . | .         | . |
| Vv03g0791          | Tc02_g010220       | Gorai.013G050500.1 | .                  | . | . | .         | . |
| Gorai.008G020500.1 | .                  | .                  | .                  | . | . | .         | . |
| .                  | .                  | .                  | .                  | . | . | .         | . |
| Vv03g0792          | .                  | .                  | .                  | . | . | .         | . |
| .                  | .                  | .                  | .                  | . | . | .         | . |
| Vv03g0793          | Tc02_g010230       | .                  | Gorai.005G231500.1 | . | . | .         | . |
| .                  | .                  | .                  | .                  | . | . | .         | . |
| Vv03g0794          | Tc02_g010240       | .                  | .                  | . | . | Gorai.    | . |
| 008G020400.1       | .                  | .                  | .                  | . | . | .         | . |
| .                  | .                  | .                  | .                  | . | . | .         | . |
| Vv03g0795          | .                  | .                  | .                  | . | . | .         | . |
| .                  | .                  | .                  | .                  | . | . | Vv07g0965 | . |
| Tc01_g006480       | .                  | Gorai.008G082900.1 | Gorai.             | . | . | Gorai.    | . |

|                    |                    |   |   |                    |        |   |
|--------------------|--------------------|---|---|--------------------|--------|---|
| 007G223000.1       | .                  | . | . | .                  | .      | . |
| Vv03g0796          | Tc02_g010260       | . | . | .                  | Gorai. | . |
| 008G020300.1       | .                  | . | . | .                  | .      | . |
| Vv03g0797          | Tc02_g010270       | . | . | Gorai.005G231400.1 | .      | . |
| .                  | .                  | . | . | .                  | .      | . |
| Vv03g0798          | .                  | . | . | .                  | .      | . |
| .                  | .                  | . | . | .                  | .      | . |
| Vv03g0799          | Tc02_g010280       | . | . | .                  | .      | . |
| .                  | .                  | . | . | .                  | .      | . |
| Vv03g0800          | Tc02_g010290       | . | . | Gorai.005G231200.1 | .      | . |
| Gorai.008G020100.1 | .                  | . | . | .                  | .      | . |
| .                  | .                  | . | . | .                  | .      | . |
| Vv03g0801          | .                  | . | . | .                  | .      | . |
| .                  | .                  | . | . | .                  | .      | . |
| Vv03g0802          | .                  | . | . | .                  | .      | . |
| .                  | .                  | . | . | .                  | .      | . |
| Vv03g0803          | .                  | . | . | .                  | .      | . |
| .                  | .                  | . | . | .                  | .      | . |
| Vv03g0804          | .                  | . | . | .                  | .      | . |
| .                  | .                  | . | . | .                  | .      | . |
| Vv03g0805          | .                  | . | . | .                  | .      | . |
| .                  | .                  | . | . | .                  | .      | . |
| Vv03g0806          | Tc02_g010300       | . | . | Gorai.005G231100.1 | .      | . |
| .                  | .                  | . | . | .                  | .      | . |
| Vv03g0807          | .                  | . | . | .                  | .      | . |
| .                  | .                  | . | . | .                  | .      | . |
| Vv03g0808          | .                  | . | . | .                  | .      | . |
| .                  | .                  | . | . | .                  | .      | . |
| Vv03g0809          | .                  | . | . | .                  | .      | . |
| .                  | .                  | . | . | .                  | .      | . |
| Vv03g0810          | Tc02_g010330       | . | . | Gorai.005G230900.1 | .      | . |
| .                  | Gorai.012G147400.1 | . | . | Vv18g0733          | .      | . |
| .                  | .                  | . | . | Gorai.010G026100.1 | .      | . |
| .                  | .                  | . | . | .                  | .      | . |
| Vv03g0811          | Tc02_g010340       | . | . | .                  | .      | . |
| Gorai.012G147300.1 | .                  | . | . | .                  | .      | . |

|                    |              |                    |                    |   |
|--------------------|--------------|--------------------|--------------------|---|
| Vv03g0812          | Tc02_g010350 | .                  | Gorai.005G230800.1 | . |
| .                  | .            | .                  | .                  | . |
| Vv03g0813          | .            | .                  | .                  | . |
| .                  | .            | .                  | .                  | . |
| Vv03g0814          | .            | .                  | Gorai.005G230600.1 | . |
| Gorai.008G019900.1 | .            | .                  | Vv18g0727          | . |
| .                  | .            | .                  | .                  | . |
| Vv03g0815          | .            | Gorai.013G050900.1 | Gorai.005G230300.1 | . |
| .                  | .            | .                  | .                  | . |
| .                  | .            | Vv07g0946          | .                  | . |
| .                  | .            | .                  | .                  | . |
| Vv03g0816          | .            | .                  | .                  | . |
| .                  | .            | .                  | .                  | . |
| Vv03g0817          | .            | .                  | .                  | . |
| .                  | .            | .                  | .                  | . |
| Vv03g0818          | .            | .                  | .                  | . |
| .                  | .            | .                  | .                  | . |
| Vv03g0819          | .            | .                  | Gorai.005G227300.1 | . |
| .                  | .            | .                  | .                  | . |
| Vv03g0820          | .            | .                  | .                  | . |
| .                  | .            | .                  | .                  | . |
| Vv03g0821          | .            | .                  | .                  | . |
| .                  | .            | .                  | .                  | . |
| Vv03g0822          | .            | .                  | .                  | . |
| .                  | .            | .                  | .                  | . |
| Vv03g0823          | .            | .                  | .                  | . |
| .                  | .            | .                  | .                  | . |
| Vv03g0824          | .            | .                  | .                  | . |
| .                  | .            | .                  | .                  | . |
| Vv03g0825          | .            | .                  | .                  | . |
| .                  | .            | .                  | .                  | . |
| Vv03g0826          | Tc02_g032020 | Gorai.013G051100.1 | .                  | . |
| Gorai.002G010900.1 | .            | .                  | .                  | . |
| .                  | .            | .                  | .                  | . |
| Vv03g0827          | .            | .                  | .                  | . |

|                    |              |   |   |   |   |   |   |
|--------------------|--------------|---|---|---|---|---|---|
| Vv18g0721          | .            | . | . | . | . | . | . |
| Vv08g0700          | .            | . | . | . | . | . | . |
| Vv03g0828          | .            | . | . | . | . | . | . |
| .                  | .            | . | . | . | . | . | . |
| .                  | .            | . | . | . | . | . | . |
| Vv03g0829          | .            | . | . | . | . | . | . |
| .                  | .            | . | . | . | . | . | . |
| .                  | .            | . | . | . | . | . | . |
| Vv03g0830          | .            | . | . | . | . | . | . |
| .                  | .            | . | . | . | . | . | . |
| .                  | .            | . | . | . | . | . | . |
| Vv03g0831          | .            | . | . | . | . | . | . |
| .                  | .            | . | . | . | . | . | . |
| .                  | .            | . | . | . | . | . | . |
| Vv03g0832          | .            | . | . | . | . | . | . |
| .                  | .            | . | . | . | . | . | . |
| .                  | .            | . | . | . | . | . | . |
| Vv03g0833          | .            | . | . | . | . | . | . |
| .                  | .            | . | . | . | . | . | . |
| .                  | .            | . | . | . | . | . | . |
| Vv03g0834          | .            | . | . | . | . | . | . |
| .                  | .            | . | . | . | . | . | . |
| .                  | .            | . | . | . | . | . | . |
| Vv03g0835          | .            | . | . | . | . | . | . |
| .                  | .            | . | . | . | . | . | . |
| .                  | .            | . | . | . | . | . | . |
| Vv03g0836          | Tc02_g010380 | . | . | . | . | . | . |
| Gorai.012G144300.1 | .            | . | . | . | . | . | . |
| .                  | .            | . | . | . | . | . | . |
| Vv03g0837          | .            | . | . | . | . | . | . |
| .                  | .            | . | . | . | . | . | . |
| .                  | .            | . | . | . | . | . | . |
| Vv03g0838          | .            | . | . | . | . | . | . |
| .                  | .            | . | . | . | . | . | . |
| .                  | .            | . | . | . | . | . | . |
| Vv03g0839          | Tc02_g010400 | . | . | . | . | . | . |
| .                  | .            | . | . | . | . | . | . |
| .                  | .            | . | . | . | . | . | . |
| Vv03g0840          | Tc02_g013860 | . | . | . | . | . | . |
| .                  | .            | . | . | . | . | . | . |
| Vv08g0706          | .            | . | . | . | . | . | . |
| Vv03g0841          | .            | . | . | . | . | . | . |
| .                  | .            | . | . | . | . | . | . |
| .                  | .            | . | . | . | . | . | . |
| Vv03g0842          | .            | . | . | . | . | . | . |
| 012G142700.1       | .            | . | . | . | . | . | . |
| .                  | .            | . | . | . | . | . | . |
| Vv03g0843          | .            | . | . | . | . | . | . |
| .                  | .            | . | . | . | . | . | . |
| .                  | .            | . | . | . | . | . | . |

|                    |              |   |   |   |   |   |           |
|--------------------|--------------|---|---|---|---|---|-----------|
| Vv03g0844          | .            | . | . | . | . | . | Vv08g0708 |
| .                  | .            | . | . | . | . | . | .         |
| Vv03g0845          | .            | . | . | . | . | . | .         |
| .                  | .            | . | . | . | . | . | .         |
| Vv03g0846          | .            | . | . | . | . | . | .         |
| .                  | .            | . | . | . | . | . | .         |
| Vv03g0847          | .            | . | . | . | . | . | .         |
| .                  | .            | . | . | . | . | . | .         |
| Vv03g0848          | Tc02_g010410 | . | . | . | . | . | .         |
| Gorai.012G145000.1 | .            | . | . | . | . | . | .         |
| .                  | .            | . | . | . | . | . | .         |
| Vv03g0849          | Tc02_g013840 | . | . | . | . | . | .         |
| .                  | .            | . | . | . | . | . | .         |
| Vv03g0850          | .            | . | . | . | . | . | .         |
| .                  | .            | . | . | . | . | . | .         |
| Vv03g0851          | .            | . | . | . | . | . | .         |
| .                  | .            | . | . | . | . | . | .         |
| Vv03g0852          | Tc02_g013830 | . | . | . | . | . | .         |
| .                  | .            | . | . | . | . | . | .         |
| Vv03g0853          | .            | . | . | . | . | . | .         |
| .                  | .            | . | . | . | . | . | .         |
| Vv03g0854          | .            | . | . | . | . | . | .         |
| .                  | .            | . | . | . | . | . | .         |
| Vv03g0855          | .            | . | . | . | . | . | .         |
| .                  | .            | . | . | . | . | . | .         |
| Vv03g0856          | .            | . | . | . | . | . | .         |
| .                  | .            | . | . | . | . | . | .         |
| Vv03g0857          | Tc02_g031750 | . | . | . | . | . | .         |
| .                  | .            | . | . | . | . | . | .         |
| Vv03g0858          | .            | . | . | . | . | . | .         |
| .                  | .            | . | . | . | . | . | .         |
| Vv03g0859          | Tc02_g013810 | . | . | . | . | . | .         |
| .                  | .            | . | . | . | . | . | .         |
| Vv03g0860          | .            | . | . | . | . | . | .         |
| .                  | .            | . | . | . | . | . | .         |

|                    |           |                    |                    |                    |                    |   |
|--------------------|-----------|--------------------|--------------------|--------------------|--------------------|---|
| Vv03g0861          | .         | .                  | .                  | .                  | Gorai.008G019500.1 | . |
| .                  | .         | .                  | .                  | .                  | .                  | . |
| Vv03g0862          | .         | .                  | Gorai.013G051500.1 | .                  | .                  | . |
| .                  | .         | .                  | .                  | .                  | .                  | . |
| Vv03g0863          | .         | .                  | .                  | .                  | .                  | . |
| Vv18g0712          | .         | .                  | .                  | .                  | .                  | . |
| Vv03g0864          | .         | .                  | .                  | Gorai.002G011000.1 | .                  | . |
| .                  | .         | .                  | .                  | .                  | .                  | . |
| Vv03g0865          | .         | .                  | .                  | .                  | .                  | . |
| .                  | .         | .                  | .                  | .                  | .                  | . |
| Vv03g0866          | .         | .                  | Gorai.013G052000.1 | .                  | .                  | . |
| .                  | .         | .                  | .                  | .                  | .                  | . |
| Vv03g0867          | .         | .                  | .                  | .                  | .                  | . |
| .                  | .         | .                  | .                  | .                  | .                  | . |
| Vv03g0868          | .         | .                  | .                  | .                  | .                  | . |
| .                  | .         | .                  | .                  | .                  | .                  | . |
| Vv03g0869          | .         | .                  | .                  | .                  | .                  | . |
| .                  | .         | .                  | .                  | .                  | .                  | . |
| Vv03g0870          | .         | .                  | .                  | .                  | .                  | . |
| .                  | .         | .                  | .                  | .                  | .                  | . |
| Tc01_g007180       | .         | .                  | Gorai.008G087400.1 | .                  | Vv07g0912          | . |
| .                  | .         | .                  | .                  | .                  | .                  | . |
| Vv03g0871          | .         | .                  | .                  | .                  | .                  | . |
| Vv18g0694          | .         | .                  | .                  | Gorai.009G222500.1 | .                  | . |
| Gorai.010G028600.1 | .         | .                  | .                  | .                  | .                  | . |
| Vv03g0872          | .         | .                  | .                  | .                  | .                  | . |
| .                  | .         | .                  | .                  | .                  | .                  | . |
| Vv03g0873          | .         | .                  | .                  | .                  | Gorai.008G019300.1 | . |
| .                  | Vv18g0672 | .                  | .                  | .                  | .                  | . |
| Vv03g0874          | .         | .                  | .                  | .                  | Gorai.008G019200.1 | . |
| .                  | .         | .                  | .                  | .                  | .                  | . |
| Vv03g0875          | .         | .                  | Gorai.002G214500.1 | .                  | Gorai.             | . |
| 002G011200.1       | .         | Gorai.008G019100.1 | .                  | .                  | .                  | . |
| .                  | .         | .                  | .                  | .                  | .                  | . |
| Vv03g0876          | .         | .                  | .                  | .                  | .                  | . |

|                    |                    |                    |   |   |        |   |   |
|--------------------|--------------------|--------------------|---|---|--------|---|---|
| .                  | .                  | .                  | . | . | .      | . | . |
| .                  | .                  | .                  | . | . | .      | . | . |
| Vv03g0877          | .                  | .                  | . | . | .      | . | . |
| .                  | .                  | .                  | . | . | .      | . | . |
| Vv03g0878          | .                  | Gorai.013G052200.1 | . | . | .      | . | . |
| .                  | .                  | .                  | . | . | .      | . | . |
| Vv03g0879          | .                  | .                  | . | . | .      | . | . |
| .                  | .                  | .                  | . | . | .      | . | . |
| Vv03g0880          | Tc02_g002290       | Gorai.002G213600.1 | . | . | .      | . | . |
| .                  | .                  | .                  | . | . | .      | . | . |
| Vv03g0881          | .                  | .                  | . | . | .      | . | . |
| .                  | .                  | .                  | . | . | .      | . | . |
| Vv03g0882          | Tc02_g010670       | .                  | . | . | Gorai. | . | . |
| 008G017200.1       | .                  | .                  | . | . | .      | . | . |
| .                  | Vv07g0913          | Tc01_g007160       | . | . | .      | . | . |
| Gorai.007G228500.1 | Gorai.003G034100.1 | .                  | . | . | .      | . | . |
| Vv03g0883          | .                  | .                  | . | . | .      | . | . |
| .                  | .                  | .                  | . | . | .      | . | . |
| Vv03g0884          | .                  | .                  | . | . | .      | . | . |
| .                  | .                  | .                  | . | . | .      | . | . |
| Vv03g0885          | Tc02_g002300       | Gorai.002G213500.1 | . | . | .      | . | . |
| .                  | .                  | .                  | . | . | .      | . | . |
| Vv03g0886          | .                  | .                  | . | . | .      | . | . |
| .                  | .                  | .                  | . | . | .      | . | . |
| Vv03g0887          | .                  | .                  | . | . | .      | . | . |
| .                  | .                  | .                  | . | . | .      | . | . |
| Vv03g0888          | .                  | .                  | . | . | .      | . | . |
| .                  | .                  | .                  | . | . | .      | . | . |
| Vv03g0889          | .                  | .                  | . | . | .      | . | . |
| .                  | .                  | .                  | . | . | .      | . | . |
| Vv03g0890          | Tc02_g002310       | .                  | . | . | .      | . | . |
| .                  | .                  | .                  | . | . | .      | . | . |
| Vv03g0891          | .                  | .                  | . | . | .      | . | . |
| .                  | .                  | .                  | . | . | .      | . | . |
| Vv03g0892          | Tc02_g002320       | Gorai.005G263100.1 | . | . | .      | . | . |
| .                  | Gorai.012G163200.1 | Vv18g0632          | . | . | .      | . | . |



|                    |                    |                    |        |   |   |   |   |
|--------------------|--------------------|--------------------|--------|---|---|---|---|
| Tc08_g002950       | .                  | .                  | .      | . | . | . | . |
| .                  | .                  | .                  | .      | . | . | . | . |
| Vv03g0893          | Tc02_g002330       | Gorai.002G213400.1 | Gorai. | . | . | . | . |
| 005G263000.1       | .                  | .                  | .      | . | . | . | . |
| .                  | .                  | .                  | .      | . | . | . | . |
| Vv03g0894          | Tc02_g002350       | Gorai.005G262800.1 | .      | . | . | . | . |
| Gorai.008G016500.1 | .                  | Vv07g0915          | .      | . | . | . | . |
| Tc01_g007140       | Gorai.008G087300.1 | Gorai.             | .      | . | . | . | . |
| 003G033900.1       | .                  | .                  | .      | . | . | . | . |
| .                  | .                  | .                  | .      | . | . | . | . |
| Vv03g0895          | .                  | .                  | .      | . | . | . | . |
| .                  | .                  | .                  | .      | . | . | . | . |
| .                  | .                  | .                  | .      | . | . | . | . |
| Vv03g0896          | Tc02_g002360       | Gorai.002G213300.1 | .      | . | . | . | . |
| .                  | .                  | .                  | .      | . | . | . | . |
| .                  | .                  | .                  | .      | . | . | . | . |
| Vv03g0897          | .                  | .                  | .      | . | . | . | . |
| .                  | .                  | .                  | .      | . | . | . | . |
| .                  | .                  | .                  | .      | . | . | . | . |
| Vv03g0898          | .                  | .                  | .      | . | . | . | . |
| .                  | .                  | .                  | .      | . | . | . | . |
| .                  | .                  | .                  | .      | . | . | . | . |
| Vv03g0899          | Tc02_g002370       | Gorai.002G213200.1 | .      | . | . | . | . |
| .                  | .                  | .                  | .      | . | . | . | . |
| .                  | .                  | .                  | .      | . | . | . | . |
| Vv03g0900          | .                  | .                  | .      | . | . | . | . |
| .                  | .                  | .                  | .      | . | . | . | . |
| .                  | .                  | .                  | .      | . | . | . | . |
| Vv03g0901          | Gorai.013G054100.1 | .                  | .      | . | . | . | . |
| .                  | Vv07g0919          | .                  | .      | . | . | . | . |
| .                  | .                  | .                  | .      | . | . | . | . |
| Vv03g0902          | .                  | .                  | .      | . | . | . | . |
| .                  | .                  | .                  | .      | . | . | . | . |
| .                  | .                  | .                  | .      | . | . | . | . |
| Vv03g0903          | Tc02_g002380       | Gorai.002G212900.1 | .      | . | . | . | . |
| .                  | .                  | .                  | .      | . | . | . | . |
| .                  | .                  | .                  | .      | . | . | . | . |
| Vv03g0904          | .                  | .                  | .      | . | . | . | . |
| .                  | .                  | .                  | .      | . | . | . | . |
| .                  | .                  | .                  | .      | . | . | . | . |
| Vv03g0905          | Tc02_g002390       | .                  | .      | . | . | . | . |
| .                  | .                  | .                  | .      | . | . | . | . |
| .                  | .                  | .                  | .      | . | . | . | . |
| Vv03g0906          | .                  | .                  | .      | . | . | . | . |
| .                  | .                  | .                  | .      | . | . | . | . |
| .                  | .                  | .                  | .      | . | . | . | . |
| Vv03g0907          | Gorai.002G212800.1 | .                  | .      | . | . | . | . |
| Gorai.008G044000.1 | .                  | .                  | .      | . | . | . | . |
| .                  | .                  | .                  | .      | . | . | . | . |



|              |                    |                    |                    |           |
|--------------|--------------------|--------------------|--------------------|-----------|
| Vv03g0924    | Tc02_g002470       | Gorai.002G212400.1 | .                  | .         |
| .            | .                  | Vv07g0926          | Tc01_g007010       | .         |
| .            | Gorai.007G227300.1 | Gorai.003G032800.1 | .                  | .         |
| .            | .                  | .                  | .                  | .         |
| Vv03g0925    | .                  | .                  | .                  | .         |
| .            | .                  | .                  | .                  | .         |
| .            | .                  | .                  | .                  | .         |
| Vv03g0926    | Tc02_g002480       | Gorai.002G212300.1 | Gorai.             | .         |
| 005G262700.1 | .                  | Gorai.008G043300.1 | .                  | Vv07g0930 |
| Tc01_g006990 | .                  | .                  | Gorai.003G032700.1 | .         |
| .            | .                  | .                  | .                  | .         |
| Vv03g0927    | Tc02_g002490       | Gorai.002G212100.1 | Gorai.             | .         |
| 005G262600.1 | .                  | .                  | .                  | .         |
| .            | .                  | .                  | .                  | .         |
| .            | .                  | .                  | .                  | .         |
| Vv03g0928    | .                  | .                  | .                  | .         |
| .            | .                  | .                  | .                  | .         |
| .            | .                  | .                  | .                  | .         |
| Vv03g0929    | .                  | .                  | .                  | .         |
| .            | .                  | .                  | .                  | .         |
| .            | .                  | .                  | .                  | .         |
| Vv03g0930    | Tc02_g002500       | .                  | Gorai.005G262500.1 | .         |
| .            | .                  | .                  | .                  | .         |
| .            | .                  | .                  | .                  | .         |
| Vv03g0931    | .                  | .                  | .                  | .         |
| .            | .                  | .                  | .                  | .         |
| .            | .                  | .                  | .                  | .         |
| Vv03g0932    | .                  | .                  | .                  | .         |
| .            | .                  | .                  | .                  | .         |
| .            | .                  | .                  | .                  | .         |
| Vv03g0933    | .                  | .                  | .                  | .         |
| .            | .                  | .                  | .                  | .         |
| .            | .                  | .                  | .                  | .         |
| Vv03g0934    | .                  | .                  | .                  | .         |
| .            | .                  | .                  | .                  | .         |
| .            | .                  | .                  | .                  | .         |
| Vv03g0935    | .                  | .                  | .                  | .         |
| .            | .                  | .                  | .                  | .         |
| .            | .                  | .                  | .                  | .         |
| Vv03g0936    | .                  | .                  | .                  | .         |
| .            | .                  | .                  | .                  | .         |
| .            | .                  | .                  | .                  | .         |
| Vv03g0937    | .                  | .                  | .                  | .         |
| .            | .                  | .                  | .                  | .         |
| .            | .                  | .                  | .                  | .         |
| Vv03g0938    | Tc02_g002530       | .                  | Gorai.005G262400.1 | .         |
| .            | Gorai.012G162200.1 | .                  | Vv07g0933          | .         |
| Tc01_g006960 | .                  | Gorai.007G226900.1 | Gorai.             | .         |
| 003G032500.1 | .                  | .                  | .                  | .         |
| .            | .                  | .                  | .                  | .         |

|                    |                    |                    |                    |   |        |   |   |
|--------------------|--------------------|--------------------|--------------------|---|--------|---|---|
| Vv03g0939          | .                  | .                  | .                  | . | .      | . | . |
| .                  | .                  | .                  | .                  | . | .      | . | . |
| Vv03g0940          | Tc02_g002540       | .                  | .                  | . | .      | . | . |
| Gorai.012G162100.1 | .                  | .                  | .                  | . | .      | . | . |
| .                  | .                  | .                  | .                  | . | .      | . | . |
| Vv03g0941          | .                  | .                  | .                  | . | .      | . | . |
| .                  | .                  | .                  | .                  | . | .      | . | . |
| .                  | .                  | .                  | .                  | . | .      | . | . |
| Vv03g0942          | Tc02_g002550       | .                  | Gorai.005G262300.1 | . | .      | . | . |
| .                  | .                  | .                  | .                  | . | .      | . | . |
| .                  | .                  | .                  | .                  | . | .      | . | . |
| Vv03g0943          | Tc02_g002560       | .                  | .                  | . | Gorai. | . | . |
| 008G043200.1       | .                  | .                  | .                  | . | .      | . | . |
| .                  | .                  | .                  | .                  | . | .      | . | . |
| Vv03g0944          | .                  | .                  | .                  | . | .      | . | . |
| .                  | .                  | .                  | .                  | . | .      | . | . |
| .                  | .                  | .                  | .                  | . | .      | . | . |
| Vv03g0945          | Tc02_g002570       | Gorai.002G211900.1 | .                  | . | .      | . | . |
| .                  | Gorai.012G162000.1 | .                  | .                  | . | .      | . | . |
| .                  | .                  | .                  | .                  | . | .      | . | . |
| .                  | .                  | .                  | .                  | . | .      | . | . |
| Vv03g0946          | .                  | .                  | .                  | . | .      | . | . |
| .                  | .                  | .                  | .                  | . | .      | . | . |
| .                  | .                  | .                  | .                  | . | .      | . | . |
| Vv03g0947          | .                  | Gorai.002G211700.1 | .                  | . | .      | . | . |
| .                  | .                  | .                  | .                  | . | .      | . | . |
| .                  | .                  | .                  | .                  | . | .      | . | . |
| Vv03g0948          | Tc02_g002590       | .                  | .                  | . | .      | . | . |
| .                  | .                  | .                  | .                  | . | .      | . | . |
| .                  | .                  | .                  | .                  | . | .      | . | . |
| Vv03g0949          | Tc02_g002600       | Gorai.002G211600.1 | .                  | . | .      | . | . |
| Gorai.008G043000.1 | .                  | .                  | .                  | . | .      | . | . |
| .                  | .                  | .                  | .                  | . | .      | . | . |
| .                  | .                  | .                  | .                  | . | .      | . | . |
| Vv03g0950          | Tc02_g002610       | Gorai.002G211500.1 | .                  | . | .      | . | . |
| .                  | Gorai.012G161700.1 | .                  | .                  | . | .      | . | . |
| .                  | .                  | .                  | .                  | . | .      | . | . |
| .                  | .                  | .                  | .                  | . | .      | . | . |
| Vv03g0951          | .                  | .                  | .                  | . | .      | . | . |
| .                  | .                  | .                  | .                  | . | .      | . | . |
| .                  | .                  | .                  | .                  | . | .      | . | . |
| Vv03g0952          | Tc02_g002620       | .                  | .                  | . | Gorai. | . | . |
| 008G042900.1       | .                  | .                  | .                  | . | .      | . | . |
| .                  | .                  | .                  | .                  | . | .      | . | . |
| .                  | .                  | .                  | .                  | . | .      | . | . |
| Vv03g0953          | .                  | .                  | .                  | . | .      | . | . |
| .                  | .                  | .                  | .                  | . | .      | . | . |
| .                  | .                  | .                  | .                  | . | .      | . | . |
| Vv03g0954          | .                  | .                  | .                  | . | .      | . | . |
| .                  | .                  | .                  | .                  | . | .      | . | . |

|                    |              |                    |   |        |
|--------------------|--------------|--------------------|---|--------|
| Vv03g0955          | Tc02_g002730 | Gorai.002G211400.1 | . | .      |
| .                  | .            | .                  | . | .      |
| Vv03g0956          | .            | .                  | . | .      |
| .                  | .            | .                  | . | .      |
| Vv03g0957          | Tc02_g002770 | Gorai.002G211200.1 | . | .      |
| .                  | .            | .                  | . | .      |
| Vv03g0958          | .            | .                  | . | .      |
| .                  | .            | .                  | . | .      |
| Vv03g0959          | .            | .                  | . | .      |
| .                  | .            | .                  | . | .      |
| Vv03g0960          | .            | .                  | . | .      |
| .                  | .            | .                  | . | .      |
| Vv03g0961          | Tc02_g002780 | Gorai.005G262000.1 | . | .      |
| .                  | .            | .                  | . | .      |
| Vv03g0962          | Tc02_g002790 | Gorai.005G261900.1 | . | .      |
| Gorai.008G042700.1 | .            | .                  | . | .      |
| .                  | .            | .                  | . | .      |
| Vv03g0963          | .            | .                  | . | .      |
| .                  | .            | .                  | . | .      |
| Vv03g0964          | .            | .                  | . | .      |
| .                  | .            | .                  | . | .      |
| Vv03g0965          | .            | .                  | . | Gorai. |
| 012G158700.1       | .            | .                  | . | .      |
| .                  | .            | .                  | . | .      |
| Vv03g0966          | .            | .                  | . | .      |
| .                  | .            | .                  | . | .      |
| Vv03g0967          | .            | .                  | . | .      |
| .                  | .            | .                  | . | .      |
| Vv03g0968          | .            | .                  | . | .      |
| .                  | .            | .                  | . | .      |
| Vv03g0969          | Tc02_g002800 | .                  | . | Gorai. |
| 008G042600.1       | .            | .                  | . | .      |
| .                  | .            | .                  | . | .      |
| Vv03g0970          | .            | .                  | . | .      |
| .                  | .            | .                  | . | .      |
| .                  | .            | .                  | . | .      |

|                    |   |   |   |                    |   |   |   |
|--------------------|---|---|---|--------------------|---|---|---|
| Vv03g0971          | . | . | . | .                  | . | . | . |
| .                  | . | . | . | .                  | . | . | . |
| Vv03g0972          | . | . | . | .                  | . | . | . |
| .                  | . | . | . | .                  | . | . | . |
| Vv03g0973          | . | . | . | Gorai.005G258900.1 | . | . | . |
| Gorai.008G039600.1 | . | . | . | .                  | . | . | . |
| .                  | . | . | . | .                  | . | . | . |
| Vv03g0974          | . | . | . | .                  | . | . | . |
| .                  | . | . | . | .                  | . | . | . |
| Vv03g0975          | . | . | . | Gorai.005G227800.1 | . | . | . |
| .                  | . | . | . | .                  | . | . | . |
| Vv03g0976          | . | . | . | .                  | . | . | . |
| .                  | . | . | . | .                  | . | . | . |
| Vv03g0977          | . | . | . | .                  | . | . | . |
| .                  | . | . | . | .                  | . | . | . |
| Vv03g0978          | . | . | . | .                  | . | . | . |
| .                  | . | . | . | .                  | . | . | . |
| Vv03g0979          | . | . | . | .                  | . | . | . |
| .                  | . | . | . | .                  | . | . | . |
| Vv03g0980          | . | . | . | Gorai.005G227500.1 | . | . | . |
| .                  | . | . | . | .                  | . | . | . |
| Vv03g0981          | . | . | . | .                  | . | . | . |
| .                  | . | . | . | .                  | . | . | . |
| Vv03g0982          | . | . | . | .                  | . | . | . |
| .                  | . | . | . | .                  | . | . | . |
| Vv03g0983          | . | . | . | .                  | . | . | . |
| .                  | . | . | . | .                  | . | . | . |
| Vv03g0984          | . | . | . | .                  | . | . | . |
| .                  | . | . | . | .                  | . | . | . |
| Vv03g0985          | . | . | . | Gorai.005G227400.1 | . | . | . |
| .                  | . | . | . | .                  | . | . | . |
| Vv03g0986          | . | . | . | .                  | . | . | . |
| .                  | . | . | . | .                  | . | . | . |
| Vv03g0987          | . | . | . | Gorai.005G227300.1 | . | . | . |

|           |   |   |                    |   |   |   |   |
|-----------|---|---|--------------------|---|---|---|---|
| .         | . | . | .                  | . | . | . | . |
| Vv03g0988 | . | . | .                  | . | . | . | . |
| Vv03g0989 | . | . | .                  | . | . | . | . |
| Vv03g0990 | . | . | .                  | . | . | . | . |
| Vv03g0991 | . | . | .                  | . | . | . | . |
| Vv03g0992 | . | . | Gorai.005G226700.1 | . | . | . | . |
| Vv03g0993 | . | . | .                  | . | . | . | . |
| Vv03g0994 | . | . | Gorai.005G224200.1 | . | . | . | . |
| Vv03g0995 | . | . | .                  | . | . | . | . |
| Vv03g0996 | . | . | .                  | . | . | . | . |
| Vv03g0997 | . | . | .                  | . | . | . | . |
| Vv03g0998 | . | . | .                  | . | . | . | . |
| Vv03g0999 | . | . | .                  | . | . | . | . |
| Vv03g1000 | . | . | .                  | . | . | . | . |
| Vv04g0001 | . | . | .                  | . | . | . | . |
| Vv04g0002 | . | . | .                  | . | . | . | . |
| Vv04g0003 | . | . | .                  | . | . | . | . |
| .         | . | . | .                  | . | . | . | . |

|                    |                    |                    |                    |        |
|--------------------|--------------------|--------------------|--------------------|--------|
| Vv04g0004          | .                  | .                  | Gorai.001G008700.1 | .      |
| Gorai.003G062600.1 | .                  | Gorai.011G072200.1 | Vv11g0333          | .      |
| Tc09_g009070       | .                  | Gorai.001G008700.1 | .                  | .      |
| .                  | .                  | .                  | .                  | .      |
| Vv04g0005          | Tc09_g009300       | Gorai.013G219500.1 | Gorai.             | .      |
| 001G026300.1       | Gorai.004G279600.1 | .                  | Gorai.011G072100.1 | .      |
| .                  | .                  | .                  | .                  | .      |
| .                  | .                  | .                  | .                  | .      |
| Vv04g0006          | .                  | Gorai.013G219600.1 | .                  | .      |
| Gorai.011G072000.1 | .                  | .                  | .                  | .      |
| .                  | .                  | .                  | .                  | .      |
| .                  | .                  | .                  | .                  | .      |
| Vv04g0007          | .                  | .                  | .                  | .      |
| .                  | .                  | .                  | .                  | .      |
| .                  | .                  | .                  | .                  | .      |
| Vv04g0008          | .                  | Gorai.001G008900.1 | .                  | .      |
| Gorai.003G061800.1 | Gorai.011G071400.1 | Vv11g0329          | .                  | .      |
| Tc09_g009030       | Gorai.001G026200.1 | .                  | Gorai.             | .      |
| 009G048600.1       | .                  | .                  | .                  | .      |
| .                  | .                  | .                  | .                  | .      |
| Vv04g0009          | .                  | Gorai.001G026100.1 | .                  | .      |
| .                  | .                  | .                  | .                  | .      |
| .                  | .                  | .                  | .                  | .      |
| Vv04g0010          | .                  | .                  | .                  | .      |
| .                  | .                  | .                  | .                  | .      |
| .                  | .                  | .                  | .                  | .      |
| Vv04g0011          | .                  | .                  | .                  | .      |
| .                  | .                  | .                  | .                  | .      |
| .                  | .                  | .                  | .                  | .      |
| Vv04g0012          | .                  | .                  | .                  | Gorai. |
| 011G068900.1       | Vv11g0326          | Tc09_g008970       | .                  | .      |
| Gorai.009G048500.1 | .                  | .                  | .                  | .      |
| .                  | .                  | .                  | .                  | .      |
| Vv04g0013          | Tc09_g009400       | Gorai.013G219700.1 | .                  | .      |
| .                  | .                  | .                  | .                  | .      |
| .                  | .                  | .                  | .                  | .      |
| Vv04g0014          | .                  | .                  | .                  | .      |
| .                  | .                  | .                  | .                  | .      |
| .                  | .                  | .                  | .                  | .      |
| Vv04g0015          | .                  | .                  | .                  | .      |
| .                  | .                  | .                  | .                  | .      |
| .                  | .                  | .                  | .                  | .      |
| Vv04g0016          | .                  | .                  | .                  | .      |
| .                  | .                  | .                  | .                  | .      |
| .                  | .                  | .                  | .                  | .      |
| Vv04g0017          | .                  | .                  | .                  | .      |
| .                  | .                  | .                  | .                  | .      |
| .                  | .                  | .                  | .                  | .      |
| Vv04g0018          | .                  | .                  | .                  | .      |
| .                  | .                  | .                  | .                  | .      |



|           |              |   |   |   |                    |   |   |
|-----------|--------------|---|---|---|--------------------|---|---|
| Vv04g0019 | .            | . | . | . | .                  | . | . |
| .         | .            | . | . | . | .                  | . | . |
| Vv04g0020 | .            | . | . | . | .                  | . | . |
| .         | .            | . | . | . | .                  | . | . |
| Vv04g0021 | .            | . | . | . | .                  | . | . |
| .         | .            | . | . | . | .                  | . | . |
| Vv04g0022 | .            | . | . | . | .                  | . | . |
| .         | .            | . | . | . | .                  | . | . |
| Vv04g0023 | .            | . | . | . | .                  | . | . |
| .         | .            | . | . | . | .                  | . | . |
| Vv04g0024 | Tc09_g009720 | . | . | . | Gorai.004G280200.1 | . | . |
| .         | .            | . | . | . | .                  | . | . |
| Vv04g0025 | .            | . | . | . | .                  | . | . |
| .         | .            | . | . | . | .                  | . | . |
| Vv04g0026 | .            | . | . | . | .                  | . | . |
| .         | .            | . | . | . | .                  | . | . |
| Vv04g0027 | .            | . | . | . | .                  | . | . |
| .         | .            | . | . | . | .                  | . | . |
| Vv04g0028 | Tc01_g025700 | . | . | . | .                  | . | . |
| .         | .            | . | . | . | .                  | . | . |
| Vv04g0029 | .            | . | . | . | .                  | . | . |
| .         | .            | . | . | . | .                  | . | . |
| Vv04g0030 | .            | . | . | . | .                  | . | . |
| .         | .            | . | . | . | .                  | . | . |
| Vv04g0031 | Tc01_g025760 | . | . | . | .                  | . | . |
| .         | .            | . | . | . | .                  | . | . |
| Vv04g0032 | Tc01_g007670 | . | . | . | .                  | . | . |
| .         | .            | . | . | . | .                  | . | . |
| Vv04g0033 | Tc01_g026140 | . | . | . | .                  | . | . |
| .         | .            | . | . | . | .                  | . | . |
| Vv04g0034 | Tc01_g007620 | . | . | . | .                  | . | . |
| .         | .            | . | . | . | .                  | . | . |
| Vv04g0035 | .            | . | . | . | .                  | . | . |

|                    |                    |                    |                    |                    |        |   |   |
|--------------------|--------------------|--------------------|--------------------|--------------------|--------|---|---|
| .                  | .                  | .                  | .                  | .                  | .      | . | . |
| .                  | .                  | .                  | .                  | .                  | .      | . | . |
| Vv04g0036          | Tc01_g007590       | .                  | .                  | .                  | .      | . | . |
| .                  | .                  | .                  | .                  | .                  | .      | . | . |
| .                  | .                  | .                  | .                  | .                  | .      | . | . |
| Vv04g0037          | .                  | .                  | .                  | .                  | .      | . | . |
| .                  | .                  | .                  | .                  | .                  | .      | . | . |
| .                  | .                  | .                  | .                  | .                  | .      | . | . |
| Vv04g0038          | .                  | .                  | .                  | .                  | .      | . | . |
| .                  | .                  | .                  | .                  | .                  | .      | . | . |
| .                  | .                  | .                  | .                  | .                  | .      | . | . |
| Vv04g0039          | Tc01_g007500       | .                  | .                  | .                  | .      | . | . |
| .                  | .                  | .                  | .                  | .                  | .      | . | . |
| .                  | .                  | .                  | .                  | .                  | .      | . | . |
| Vv04g0040          | .                  | .                  | .                  | .                  | .      | . | . |
| .                  | .                  | .                  | .                  | .                  | .      | . | . |
| .                  | .                  | .                  | .                  | .                  | .      | . | . |
| Vv04g0041          | Tc01_g007220       | .                  | .                  | .                  | .      | . | . |
| .                  | .                  | .                  | .                  | .                  | .      | . | . |
| .                  | .                  | .                  | .                  | .                  | .      | . | . |
| Vv04g0042          | .                  | .                  | .                  | .                  | .      | . | . |
| .                  | .                  | .                  | .                  | .                  | .      | . | . |
| .                  | .                  | .                  | .                  | .                  | .      | . | . |
| Vv04g0043          | .                  | .                  | Gorai.001G009600.1 | .                  | .      | . | . |
| Gorai.003G061300.1 | .                  | .                  | .                  | .                  | .      | . | . |
| .                  | .                  | .                  | .                  | .                  | .      | . | . |
| .                  | .                  | .                  | .                  | .                  | .      | . | . |
| Vv04g0044          | .                  | .                  | .                  | .                  | .      | . | . |
| .                  | .                  | .                  | .                  | .                  | .      | . | . |
| .                  | .                  | .                  | .                  | .                  | .      | . | . |
| Vv04g0045          | Tc01_g026460       | .                  | .                  | .                  | .      | . | . |
| .                  | .                  | .                  | .                  | .                  | .      | . | . |
| .                  | .                  | .                  | .                  | .                  | .      | . | . |
| Vv04g0046          | .                  | Gorai.013G229500.1 | .                  | Gorai.001G025300.1 | .      | . | . |
| .                  | Gorai.004G282500.1 | .                  | Gorai.003G061200.1 | .                  | .      | . | . |
| Vv11g0300          | Tc09_g008680       | .                  | Gorai.013G229500.1 | .                  | Gorai. | . | . |
| 001G025300.1       | .                  | Gorai.009G028500.1 | .                  | Gorai.010G078500.1 | .      | . | . |
| .                  | .                  | .                  | .                  | .                  | .      | . | . |
| .                  | .                  | .                  | .                  | .                  | .      | . | . |
| Vv04g0047          | .                  | .                  | .                  | .                  | .      | . | . |
| .                  | .                  | .                  | .                  | .                  | .      | . | . |
| .                  | .                  | .                  | .                  | .                  | .      | . | . |
| Vv04g0048          | .                  | .                  | Gorai.004G282600.1 | .                  | .      | . | . |
| .                  | .                  | .                  | .                  | .                  | .      | . | . |
| .                  | .                  | .                  | .                  | .                  | .      | . | . |
| Vv04g0049          | .                  | Gorai.013G229200.1 | .                  | Gorai.001G025000.1 | .      | . | . |
| .                  | Gorai.003G061100.1 | .                  | .                  | Vv11g0291          | .      | . | . |
| Tc09_g008570       | Gorai.013G229200.1 | .                  | Gorai.001G025000.1 | .                  | .      | . | . |
| .                  | Gorai.009G029100.1 | .                  | Gorai.010G079100.1 | .                  | .      | . | . |
| .                  | .                  | .                  | .                  | .                  | .      | . | . |
| Vv04g0050          | Tc01_g026890       | .                  | .                  | .                  | .      | . | . |

|                    |                    |                    |                    |                    |   |   |   |
|--------------------|--------------------|--------------------|--------------------|--------------------|---|---|---|
| .                  | .                  | .                  | .                  | .                  | . | . | . |
| Vv04g0051          | .                  | .                  | Gorai.001G024800.1 | .                  | . | . | . |
| .                  | .                  | .                  | .                  | .                  | . | . | . |
| Vv04g0052          | .                  | .                  | Gorai.001G024700.1 | .                  | . | . | . |
| .                  | .                  | .                  | .                  | .                  | . | . | . |
| Vv04g0053          | .                  | .                  | Gorai.001G024600.1 | .                  | . | . | . |
| .                  | .                  | .                  | .                  | .                  | . | . | . |
| Vv04g0054          | .                  | .                  | Gorai.001G024500.1 | .                  | . | . | . |
| .                  | .                  | .                  | .                  | .                  | . | . | . |
| Vv04g0055          | .                  | Gorai.013G219900.1 | .                  | .                  | . | . | . |
| .                  | Vv11g0285          | .                  | .                  | .                  | . | . | . |
| .                  | Gorai.010G079600.1 | .                  | .                  | .                  | . | . | . |
| .                  | .                  | .                  | .                  | .                  | . | . | . |
| Vv04g0056          | .                  | .                  | .                  | .                  | . | . | . |
| .                  | .                  | .                  | .                  | .                  | . | . | . |
| Vv04g0057          | .                  | Gorai.013G229000.1 | .                  | Gorai.001G009900.1 | . | . | . |
| .                  | Gorai.004G283000.1 | .                  | .                  | Vv11g0281          | . | . | . |
| Tc09_g008500       | Gorai.013G229000.1 | .                  | Gorai.001G024400.1 | .                  | . | . | . |
| Gorai.004G283000.1 | Gorai.009G047600.1 | .                  | .                  | .                  | . | . | . |
| .                  | .                  | .                  | .                  | .                  | . | . | . |
| Vv04g0058          | Tc01_g007040       | .                  | .                  | .                  | . | . | . |
| .                  | .                  | .                  | .                  | .                  | . | . | . |
| Vv04g0059          | .                  | .                  | .                  | .                  | . | . | . |
| .                  | .                  | .                  | .                  | .                  | . | . | . |
| Vv04g0060          | .                  | .                  | .                  | .                  | . | . | . |
| .                  | .                  | .                  | .                  | .                  | . | . | . |
| Vv04g0061          | .                  | .                  | .                  | .                  | . | . | . |
| Vv09g0256          | .                  | .                  | .                  | .                  | . | . | . |
| Vv11g0276          | Tc09_g008450       | Gorai.013G228900.1 | .                  | Gorai.             | . | . | . |
| 001G010300.1       | Gorai.004G283100.1 | Gorai.009G029400.1 | .                  | .                  | . | . | . |
| Gorai.010G080200.1 | .                  | .                  | .                  | .                  | . | . | . |
| Vv04g0062          | .                  | .                  | .                  | .                  | . | . | . |
| .                  | .                  | .                  | .                  | .                  | . | . | . |
| Vv04g0063          | .                  | .                  | Gorai.004G288200.1 | .                  | . | . | . |
| .                  | .                  | .                  | .                  | .                  | . | . | . |
| Vv04g0064          | .                  | .                  | .                  | Gorai.003G060400.1 | . | . | . |
| .                  | Vv09g0250          | .                  | .                  | .                  | . | . | . |
| .                  | .                  | .                  | .                  | .                  | . | . | . |
| Vv04g0065          | .                  | Gorai.001G024100.1 | .                  | .                  | . | . | . |

|              |                    |           |                    |   |   |
|--------------|--------------------|-----------|--------------------|---|---|
| .            | Vv09g0247          | .         | .                  | . | . |
| Vv04g0066    | .                  | .         | Gorai.004G288100.1 | . | . |
| Vv04g0067    | .                  | .         | Gorai.004G288000.1 | . | . |
| Vv04g0068    | .                  | .         | .                  | . | . |
| Vv04g0069    | .                  | .         | Gorai.003G060300.1 | . | . |
|              | Gorai.011G068900.1 | Vv09g0245 | .                  | . | . |
|              | Gorai.011G068900.1 | .         | .                  | . | . |
| Vv04g0070    | .                  | .         | .                  | . | . |
| Vv04g0071    | .                  | .         | Gorai.001G023700.1 | . | . |
| Vv04g0072    | .                  | .         | Gorai.001G023600.1 | . | . |
| Vv04g0073    | .                  | .         | .                  | . | . |
| Vv04g0074    | .                  | .         | .                  | . | . |
| Vv04g0075    | .                  | .         | .                  | . | . |
| Vv04g0076    | .                  | .         | .                  | . | . |
| Vv04g0077    | .                  | .         | .                  | . | . |
| Vv04g0078    | .                  | .         | .                  | . | . |
| 011G067900.1 | Vv09g0234          | .         | Gorai.010G231600.1 | . | . |
|              | Gorai.011G067900.1 | .         | .                  | . | . |
| Vv04g0079    | .                  | .         | Gorai.004G287500.1 | . | . |
| Vv04g0080    | .                  | .         | .                  | . | . |
| Vv04g0081    | .                  | .         | .                  | . | . |

|                    |                    |                    |                    |           |           |   |   |
|--------------------|--------------------|--------------------|--------------------|-----------|-----------|---|---|
| .                  | .                  | .                  | .                  | .         | .         | . | . |
| Vv04g0082          | .                  | .                  | Gorai.001G023500.1 | .         | .         | . | . |
| .                  | .                  | .                  | .                  | .         | .         | . | . |
| Vv04g0083          | .                  | .                  | Gorai.001G023300.1 | .         | .         | . | . |
| Gorai.003G060000.1 | .                  | Gorai.011G067400.1 | .                  | Vv09g0225 | .         | . | . |
| .                  | .                  | .                  | Gorai.011G067400.1 | .         | .         | . | . |
| Vv11g0258          | .                  | .                  | Gorai.001G023300.1 | .         | .         | . | . |
| Gorai.009G046000.1 | .                  | .                  | .                  | .         | .         | . | . |
| Vv04g0084          | .                  | .                  | .                  | .         | .         | . | . |
| .                  | .                  | .                  | .                  | .         | .         | . | . |
| Vv04g0085          | .                  | .                  | Gorai.001G011000.1 | .         | .         | . | . |
| .                  | .                  | .                  | .                  | .         | .         | . | . |
| Vv11g0251          | Tc09_g008200       | .                  | Gorai.001G023200.1 | .         | .         | . | . |
| .                  | Gorai.009G045800.1 | Gorai.010G081500.1 | .                  | .         | .         | . | . |
| Vv04g0086          | .                  | .                  | .                  | .         | .         | . | . |
| .                  | .                  | .                  | .                  | .         | .         | . | . |
| Vv04g0087          | .                  | .                  | .                  | .         | Gorai.    | . | . |
| 011G067300.1       | Vv09g0223          | .                  | .                  | .         | .         | . | . |
| Gorai.011G067300.1 | .                  | Vv11g0250          | Tc09_g008190       | .         | .         | . | . |
| .                  | Gorai.009G030700.1 | .                  | .                  | .         | .         | . | . |
| Vv04g0088          | Tc09_g001780       | Gorai.001G023100.1 | .                  | .         | .         | . | . |
| .                  | .                  | .                  | .                  | .         | .         | . | . |
| Vv04g0089          | .                  | Gorai.001G023000.1 | Gorai.             | .         | .         | . | . |
| 004G287300.1       | .                  | .                  | .                  | .         | .         | . | . |
| .                  | .                  | .                  | .                  | .         | .         | . | . |
| Vv04g0090          | .                  | .                  | .                  | .         | .         | . | . |
| .                  | .                  | .                  | .                  | .         | Vv11g0243 | . | . |
| .                  | .                  | .                  | Gorai.009G030900.1 | .         | .         | . | . |
| Gorai.010G081800.1 | .                  | .                  | .                  | .         | .         | . | . |
| Vv04g0091          | Gorai.013G220000.1 | .                  | .                  | .         | .         | . | . |
| .                  | .                  | .                  | .                  | .         | .         | . | . |
| Vv04g0092          | Tc01_g022970       | .                  | .                  | .         | .         | . | . |
| .                  | .                  | .                  | .                  | .         | .         | . | . |
| Vv04g0093          | Tc01_g034390       | .                  | .                  | .         | .         | . | . |
| .                  | .                  | .                  | .                  | .         | .         | . | . |
| Vv04g0094          | .                  | .                  | .                  | .         | .         | . | . |
| .                  | .                  | .                  | .                  | .         | .         | . | . |
| Vv04g0095          | Tc01_g006940       | .                  | .                  | .         | .         | . | . |
| .                  | .                  | .                  | .                  | .         | .         | . | . |
| .                  | .                  | .                  | .                  | .         | .         | . | . |

|                    |              |                    |                    |   |   |   |
|--------------------|--------------|--------------------|--------------------|---|---|---|
| Vv04g0096          | Tc01_g034580 | .                  | .                  | . | . | . |
| .                  | .            | .                  | .                  | . | . | . |
| Vv04g0097          | .            | .                  | .                  | . | . | . |
| .                  | .            | .                  | .                  | . | . | . |
| Vv04g0098          | .            | .                  | .                  | . | . | . |
| .                  | .            | .                  | .                  | . | . | . |
| Vv04g0099          | .            | .                  | Gorai.001G022500.1 | . | . | . |
| .                  | .            | .                  | .                  | . | . | . |
| Vv04g0100          | .            | .                  | .                  | . | . | . |
| .                  | .            | .                  | .                  | . | . | . |
| Vv04g0101          | .            | .                  | .                  | . | . | . |
| .                  | .            | .                  | .                  | . | . | . |
| Vv04g0102          | .            | .                  | .                  | . | . | . |
| .                  | .            | .                  | .                  | . | . | . |
| Vv04g0103          | Tc01_g034790 | Gorai.013G228500.1 | .                  | . | . | . |
| .                  | .            | .                  | .                  | . | . | . |
| Vv04g0104          | .            | Gorai.013G227200.1 | Gorai.001G022400.1 | . | . | . |
| .                  | .            | .                  | .                  | . | . | . |
| .                  | .            | .                  | .                  | . | . | . |
| Vv04g0105          | .            | .                  | Gorai.001G022300.1 | . | . | . |
| .                  | .            | .                  | .                  | . | . | . |
| Vv04g0106          | .            | .                  | .                  | . | . | . |
| .                  | .            | .                  | .                  | . | . | . |
| Vv04g0107          | Tc01_g021630 | .                  | .                  | . | . | . |
| .                  | .            | .                  | .                  | . | . | . |
| Vv04g0108          | .            | .                  | .                  | . | . | . |
| .                  | .            | .                  | .                  | . | . | . |
| Vv04g0109          | Tc01_g029760 | .                  | .                  | . | . | . |
| .                  | .            | .                  | .                  | . | . | . |
| Vv04g0110          | Tc01_g034860 | .                  | .                  | . | . | . |
| .                  | .            | .                  | .                  | . | . | . |
| Vv04g0111          | .            | .                  | Gorai.003G057000.1 | . | . | . |
| .                  | Vv09g0209    | .                  | .                  | . | . | . |
| Gorai.011G064900.1 | .            | .                  | .                  | . | . | . |
| .                  | .            | .                  | .                  | . | . | . |

|                    |                    |                    |                    |   |                    |        |   |
|--------------------|--------------------|--------------------|--------------------|---|--------------------|--------|---|
| Vv04g0112          | .                  | .                  | .                  | . | .                  | Gorai. | . |
| 011G064900.1       | .                  | .                  | .                  | . | .                  | .      | . |
| Vv04g0113          | Tc01_g029920       | .                  | .                  | . | .                  | .      | . |
| Gorai.011G064700.1 | Vv09g0207          | Tc06_g008840       | .                  | . | .                  | .      | . |
| .                  | Gorai.011G064700.1 | .                  | .                  | . | .                  | .      | . |
| Vv04g0114          | .                  | Gorai.013G220100.1 | .                  | . | Gorai.001G022200.1 | .      | . |
| .                  | .                  | .                  | .                  | . | .                  | .      | . |
| .                  | .                  | .                  | .                  | . | .                  | .      | . |
| Vv04g0115          | Tc01_g030320       | .                  | .                  | . | .                  | .      | . |
| .                  | .                  | .                  | .                  | . | .                  | .      | . |
| .                  | .                  | .                  | .                  | . | .                  | .      | . |
| Vv04g0116          | .                  | .                  | .                  | . | .                  | Gorai. | . |
| 011G061800.1       | .                  | .                  | .                  | . | .                  | .      | . |
| .                  | Vv11g0206          | Tc09_g007750       | .                  | . | .                  | .      | . |
| Gorai.009G044400.1 | Gorai.010G083600.1 | .                  | .                  | . | .                  | .      | . |
| Vv04g0117          | .                  | .                  | .                  | . | .                  | .      | . |
| .                  | .                  | .                  | .                  | . | .                  | .      | . |
| .                  | .                  | .                  | .                  | . | .                  | .      | . |
| Vv04g0118          | .                  | .                  | Gorai.001G012200.1 | . | .                  | .      | . |
| .                  | .                  | .                  | .                  | . | .                  | .      | . |
| .                  | .                  | .                  | .                  | . | .                  | .      | . |
| Vv04g0119          | Tc01_g035120       | .                  | .                  | . | Gorai.004G286900.1 | .      | . |
| .                  | .                  | .                  | .                  | . | .                  | .      | . |
| .                  | .                  | .                  | .                  | . | .                  | .      | . |
| Vv04g0120          | Tc01_g022920       | .                  | .                  | . | .                  | .      | . |
| .                  | .                  | .                  | .                  | . | .                  | .      | . |
| .                  | .                  | .                  | .                  | . | .                  | .      | . |
| Vv04g0121          | .                  | .                  | .                  | . | .                  | .      | . |
| .                  | .                  | .                  | .                  | . | .                  | .      | . |
| .                  | .                  | .                  | .                  | . | .                  | .      | . |
| Vv04g0122          | .                  | .                  | .                  | . | .                  | .      | . |
| .                  | .                  | .                  | .                  | . | .                  | .      | . |
| .                  | .                  | .                  | .                  | . | .                  | .      | . |
| Vv04g0123          | .                  | .                  | .                  | . | .                  | .      | . |
| .                  | .                  | .                  | .                  | . | .                  | .      | . |
| .                  | .                  | .                  | .                  | . | .                  | .      | . |
| Vv04g0124          | .                  | .                  | .                  | . | .                  | .      | . |
| .                  | .                  | .                  | .                  | . | .                  | .      | . |
| .                  | .                  | .                  | .                  | . | .                  | .      | . |
| Vv04g0125          | Tc09_g001960       | .                  | .                  | . | .                  | .      | . |
| .                  | .                  | .                  | .                  | . | .                  | .      | . |
| .                  | .                  | .                  | .                  | . | .                  | .      | . |
| Vv04g0126          | .                  | .                  | .                  | . | .                  | .      | . |
| .                  | .                  | .                  | .                  | . | .                  | .      | . |
| .                  | .                  | .                  | .                  | . | .                  | .      | . |
| Vv04g0127          | .                  | .                  | .                  | . | .                  | .      | . |
| .                  | .                  | .                  | .                  | . | .                  | .      | . |

|                    |                    |                    |                    |   |   |
|--------------------|--------------------|--------------------|--------------------|---|---|
| Vv04g0128          | Tc01_g022480       | .                  | .                  | . | . |
| Gorai.001G107000.1 | .                  | .                  | .                  | . | . |
| Vv04g0129          | .                  | .                  | .                  | . | . |
| .                  | .                  | .                  | .                  | . | . |
| Vv04g0130          | .                  | .                  | .                  | . | . |
| .                  | .                  | .                  | .                  | . | . |
| Vv04g0131          | .                  | .                  | .                  | . | . |
| .                  | .                  | .                  | .                  | . | . |
| Vv04g0132          | .                  | .                  | .                  | . | . |
| .                  | .                  | .                  | .                  | . | . |
| Vv04g0133          | .                  | .                  | Gorai.004G286500.1 | . | . |
| .                  | .                  | .                  | .                  | . | . |
| Vv04g0134          | Tc01_g022260       | .                  | .                  | . | . |
| .                  | .                  | .                  | .                  | . | . |
| Vv04g0135          | Tc01_g006540       | .                  | .                  | . | . |
| .                  | .                  | .                  | .                  | . | . |
| Vv04g0136          | Gorai.013G226800.1 | .                  | .                  | . | . |
| Vv11g0176          | Gorai.013G226800.1 | .                  | .                  | . | . |
| Vv04g0137          | Tc01_g030700       | .                  | Gorai.004G286400.1 | . | . |
| .                  | .                  | .                  | .                  | . | . |
| Vv04g0138          | .                  | .                  | .                  | . | . |
| .                  | .                  | .                  | .                  | . | . |
| Vv04g0139          | .                  | Gorai.004G284200.1 | .                  | . | . |
| .                  | .                  | .                  | .                  | . | . |
| Vv04g0140          | .                  | .                  | .                  | . | . |
| Tc09_g007450       | Gorai.001G013500.1 | .                  | Vv11g0173          | . | . |
| Vv04g0141          | Gorai.013G220700.1 | Gorai.001G021800.1 | .                  | . | . |
| .                  | Vv09g0170          | .                  | .                  | . | . |
| .                  | .                  | .                  | .                  | . | . |
| Vv04g0142          | .                  | .                  | .                  | . | . |
| .                  | .                  | .                  | .                  | . | . |
| Vv04g0143          | .                  | .                  | .                  | . | . |



|           |              |                    |   |                    |   |   |   |
|-----------|--------------|--------------------|---|--------------------|---|---|---|
| .         | .            | .                  | . | .                  | . | . | . |
| .         | .            | .                  | . | .                  | . | . | . |
| Vv04g0144 | .            | .                  | . | .                  | . | . | . |
| .         | .            | .                  | . | .                  | . | . | . |
| .         | .            | .                  | . | .                  | . | . | . |
| Vv04g0145 | .            | Gorai.013G226500.1 | . | Gorai.001G021600.1 | . | . | . |
| .         | .            | .                  | . | .                  | . | . | . |
| .         | .            | Vv11g0159          | . | .                  | . | . | . |
| .         | .            | .                  | . | .                  | . | . | . |
| Vv04g0146 | Tc01_g035290 | .                  | . | .                  | . | . | . |
| .         | .            | .                  | . | .                  | . | . | . |
| .         | .            | .                  | . | .                  | . | . | . |
| Vv04g0147 | Tc01_g016710 | .                  | . | .                  | . | . | . |
| .         | .            | .                  | . | .                  | . | . | . |
| .         | .            | .                  | . | .                  | . | . | . |
| Vv04g0148 | .            | .                  | . | .                  | . | . | . |
| Vv13g0555 | .            | .                  | . | .                  | . | . | . |
| .         | .            | .                  | . | .                  | . | . | . |
| Vv04g0149 | .            | Gorai.001G021400.1 | . | .                  | . | . | . |
| .         | Vv13g0535    | .                  | . | Gorai.011G275900.1 | . | . | . |
| .         | .            | .                  | . | .                  | . | . | . |
| .         | .            | .                  | . | .                  | . | . | . |
| Vv04g0150 | .            | .                  | . | .                  | . | . | . |
| Vv13g0532 | .            | .                  | . | .                  | . | . | . |
| .         | .            | .                  | . | .                  | . | . | . |
| Vv04g0151 | .            | .                  | . | .                  | . | . | . |
| Vv13g0514 | .            | .                  | . | .                  | . | . | . |
| .         | .            | .                  | . | .                  | . | . | . |
| Vv04g0152 | .            | .                  | . | .                  | . | . | . |
| .         | .            | .                  | . | .                  | . | . | . |
| .         | .            | .                  | . | .                  | . | . | . |
| Vv04g0153 | .            | .                  | . | .                  | . | . | . |
| .         | .            | .                  | . | .                  | . | . | . |
| .         | .            | .                  | . | .                  | . | . | . |
| Vv04g0154 | .            | .                  | . | .                  | . | . | . |
| .         | .            | .                  | . | .                  | . | . | . |
| .         | .            | .                  | . | .                  | . | . | . |
| Vv04g0155 | .            | .                  | . | .                  | . | . | . |
| Vv13g0508 | .            | .                  | . | .                  | . | . | . |
| .         | .            | .                  | . | .                  | . | . | . |
| Vv04g0156 | .            | .                  | . | .                  | . | . | . |
| Vv13g0506 | .            | .                  | . | .                  | . | . | . |
| .         | .            | .                  | . | .                  | . | . | . |
| Vv04g0157 | .            | .                  | . | .                  | . | . | . |
| Vv13g0501 | .            | .                  | . | .                  | . | . | . |
| .         | .            | .                  | . | .                  | . | . | . |
| Vv04g0158 | .            | .                  | . | .                  | . | . | . |
| Vv13g0500 | .            | .                  | . | .                  | . | . | . |
| .         | .            | .                  | . | .                  | . | . | . |
| Vv04g0159 | .            | .                  | . | .                  | . | . | . |

|                    |                    |                    |                    |              |   |   |   |
|--------------------|--------------------|--------------------|--------------------|--------------|---|---|---|
| Vv13g0499          | .                  | .                  | .                  | .            | . | . | . |
| .                  | .                  | .                  | .                  | .            | . | . | . |
| Vv04g0160          | .                  | .                  | .                  | .            | . | . | . |
| Vv13g0498          | .                  | .                  | .                  | .            | . | . | . |
| .                  | .                  | .                  | .                  | .            | . | . | . |
| Vv04g0161          | .                  | .                  | .                  | .            | . | . | . |
| .                  | .                  | .                  | .                  | .            | . | . | . |
| .                  | .                  | .                  | .                  | .            | . | . | . |
| Vv04g0162          | .                  | .                  | .                  | .            | . | . | . |
| .                  | .                  | .                  | .                  | .            | . | . | . |
| .                  | .                  | .                  | .                  | .            | . | . | . |
| Vv04g0163          | .                  | .                  | .                  | .            | . | . | . |
| .                  | .                  | .                  | .                  | .            | . | . | . |
| .                  | .                  | .                  | .                  | .            | . | . | . |
| Vv04g0164          | Tc09_g002350       | .                  | .                  | .            | . | . | . |
| .                  | .                  | .                  | .                  | .            | . | . | . |
| .                  | .                  | .                  | .                  | .            | . | . | . |
| Vv04g0165          | Tc01_g031130       | Gorai.013G220800.1 | .                  | .            | . | . | . |
| .                  | .                  | .                  | .                  | .            | . | . | . |
| .                  | .                  | .                  | .                  | .            | . | . | . |
| Vv04g0166          | .                  | Gorai.013G226400.1 | Gorai.001G021300.1 | .            | . | . | . |
| .                  | .                  | .                  | Vv09g0140          | .            | . | . | . |
| .                  | .                  | .                  | Vv11g0146          | Tc09_g007320 | . | . | . |
| Gorai.013G226400.1 | .                  | .                  | Gorai.009G041700.1 | .            | . | . | . |
| Gorai.010G086100.1 | .                  | .                  | .                  | .            | . | . | . |
| Vv04g0167          | Tc01_g035320       | .                  | .                  | .            | . | . | . |
| .                  | .                  | .                  | .                  | .            | . | . | . |
| .                  | .                  | .                  | .                  | .            | . | . | . |
| Vv04g0168          | .                  | .                  | Gorai.001G021100.1 | .            | . | . | . |
| .                  | .                  | .                  | .                  | .            | . | . | . |
| .                  | .                  | .                  | .                  | .            | . | . | . |
| Vv04g0169          | .                  | .                  | Gorai.001G021000.1 | .            | . | . | . |
| .                  | Vv09g0132          | .                  | .                  | .            | . | . | . |
| .                  | Vv11g0141          | Tc09_g007270       | .                  | .            | . | . | . |
| Gorai.009G041500.1 | .                  | Gorai.010G086600.1 | .                  | .            | . | . | . |
| Vv04g0170          | Tc01_g035500       | .                  | .                  | .            | . | . | . |
| .                  | .                  | .                  | .                  | .            | . | . | . |
| .                  | .                  | .                  | .                  | .            | . | . | . |
| Vv04g0171          | .                  | .                  | Gorai.001G020900.1 | .            | . | . | . |
| .                  | .                  | .                  | .                  | .            | . | . | . |
| .                  | .                  | .                  | .                  | .            | . | . | . |
| Vv11g0138          | Tc09_g007230       | .                  | .                  | .            | . | . | . |
| Gorai.009G041300.1 | Gorai.010G086800.1 | .                  | .                  | .            | . | . | . |
| Vv04g0172          | .                  | .                  | .                  | .            | . | . | . |
| .                  | .                  | .                  | .                  | .            | . | . | . |
| .                  | .                  | .                  | .                  | .            | . | . | . |
| Tc09_g007220       | Gorai.013G225800.1 | Gorai.001G014500.1 | .                  | .            | . | . | . |
| .                  | .                  | .                  | .                  | .            | . | . | . |
| Vv04g0173          | .                  | .                  | .                  | .            | . | . | . |
| .                  | .                  | .                  | .                  | .            | . | . | . |
| .                  | .                  | .                  | .                  | .            | . | . | . |
| Vv04g0174          | .                  | .                  | Gorai.001G020800.1 | .            | . | . | . |

|              |              |                    |                    |        |   |
|--------------|--------------|--------------------|--------------------|--------|---|
| .            | Vv09g0128    | .                  | .                  | .      | . |
| .            | Vv11g0134    | Tc09_g007200       | .                  | Gorai. | . |
| 001G014700.1 | .            | Gorai.009G041200.1 | .                  | .      | . |
| Vv04g0175    | .            | .                  | .                  | .      | . |
| .            | .            | .                  | .                  | .      | . |
| Vv04g0176    | .            | .                  | .                  | .      | . |
| .            | .            | .                  | .                  | .      | . |
| Vv04g0177    | Tc01_g035730 | .                  | Gorai.001G020700.1 | .      | . |
| .            | .            | .                  | .                  | .      | . |
| Vv04g0178    | .            | .                  | .                  | .      | . |
| .            | .            | .                  | .                  | .      | . |
| Vv04g0179    | .            | .                  | .                  | .      | . |
| .            | .            | .                  | .                  | .      | . |
| Vv04g0180    | .            | .                  | .                  | .      | . |
| .            | .            | .                  | .                  | .      | . |
| Vv04g0181    | .            | .                  | .                  | .      | . |
| .            | .            | .                  | .                  | .      | . |
| Vv04g0182    | .            | .                  | .                  | .      | . |
| .            | .            | .                  | .                  | .      | . |
| Vv04g0183    | .            | .                  | .                  | .      | . |
| .            | .            | .                  | .                  | .      | . |
| Vv04g0184    | .            | .                  | .                  | .      | . |
| .            | .            | .                  | .                  | .      | . |
| Vv04g0185    | .            | .                  | .                  | .      | . |
| .            | .            | .                  | .                  | .      | . |
| Vv04g0186    | .            | Gorai.001G020300.1 | .                  | .      | . |
| .            | .            | .                  | .                  | .      | . |
| Vv04g0187    | Tc01_g017140 | .                  | .                  | .      | . |
| .            | .            | .                  | .                  | .      | . |
| Vv04g0188    | Tc01_g031460 | .                  | .                  | .      | . |
| .            | .            | .                  | .                  | .      | . |
| Vv04g0189    | .            | Gorai.013G221000.1 | .                  | .      | . |
| .            | .            | .                  | .                  | .      | . |
| Vv04g0190    | Tc09_g002550 | .                  | Gorai.001G020200.1 | .      | . |
| .            | .            | .                  | .                  | .      | . |

|           |                    |   |                    |   |   |
|-----------|--------------------|---|--------------------|---|---|
| Vv04g0191 | .                  | . | Gorai.001G020100.1 | . | . |
| .         | .                  | . | .                  | . | . |
| Vv04g0192 | .                  | . | .                  | . | . |
| .         | .                  | . | .                  | . | . |
| Vv04g0193 | .                  | . | Gorai.001G020000.1 | . | . |
| .         | .                  | . | .                  | . | . |
| Vv04g0194 | .                  | . | .                  | . | . |
| .         | .                  | . | .                  | . | . |
| Vv04g0195 | .                  | . | Gorai.001G019900.1 | . | . |
| .         | .                  | . | .                  | . | . |
| Vv04g0196 | Tc01_g028510       | . | .                  | . | . |
| .         | .                  | . | .                  | . | . |
| Vv04g0197 | .                  | . | .                  | . | . |
| .         | .                  | . | .                  | . | . |
| Vv04g0198 | Tc09_g002700       | . | .                  | . | . |
| .         | .                  | . | .                  | . | . |
| Vv04g0199 | .                  | . | .                  | . | . |
| .         | .                  | . | .                  | . | . |
| Vv04g0200 | .                  | . | .                  | . | . |
| .         | .                  | . | .                  | . | . |
| Vv04g0201 | .                  | . | .                  | . | . |
| .         | .                  | . | .                  | . | . |
| Vv04g0202 | .                  | . | Gorai.001G019700.1 | . | . |
| .         | .                  | . | .                  | . | . |
| Vv11g0105 | Tc09_g006940       | . | Gorai.001G015500.1 | . | . |
| .         | Gorai.009G040300.1 | . | .                  | . | . |
| Vv04g0203 | Tc01_g016370       | . | .                  | . | . |
| .         | .                  | . | .                  | . | . |
| Vv04g0204 | .                  | . | .                  | . | . |
| .         | .                  | . | .                  | . | . |
| Vv04g0205 | .                  | . | Gorai.001G019600.1 | . | . |
| .         | .                  | . | .                  | . | . |
| Vv04g0206 | .                  | . | .                  | . | . |
| .         | .                  | . | .                  | . | . |
| .         | .                  | . | .                  | . | . |

|           |                    |                    |                    |                    |   |   |
|-----------|--------------------|--------------------|--------------------|--------------------|---|---|
| Vv04g0207 | .                  | .                  | .                  | .                  | . | . |
| Vv09g0102 | .                  | .                  | Gorai.010G235200.1 | .                  | . | . |
| .         | .                  | .                  | .                  | .                  | . | . |
| Vv04g0208 | .                  | .                  | .                  | .                  | . | . |
| .         | .                  | .                  | .                  | .                  | . | . |
| Vv04g0209 | Tc01_g031820       | .                  | .                  | .                  | . | . |
| .         | .                  | .                  | .                  | .                  | . | . |
| Vv04g0210 | .                  | .                  | .                  | .                  | . | . |
| .         | .                  | .                  | .                  | .                  | . | . |
| Vv04g0211 | .                  | Gorai.013G223700.1 | .                  | Gorai.001G019400.1 | . | . |
| .         | .                  | .                  | .                  | .                  | . | . |
| .         | .                  | .                  | .                  | .                  | . | . |
| Vv04g0212 | .                  | Gorai.013G221200.1 | .                  | Gorai.001G019300.1 | . | . |
| .         | .                  | .                  | .                  | .                  | . | . |
| .         | .                  | Vv11g0081          | Tc09_g006770       | .                  | . | . |
| .         | Gorai.009G036300.1 | .                  | Gorai.010G089300.1 | .                  | . | . |
| Vv04g0213 | .                  | Gorai.013G221300.1 | .                  | .                  | . | . |
| .         | .                  | .                  | .                  | .                  | . | . |
| .         | .                  | .                  | .                  | .                  | . | . |
| Vv04g0214 | Tc01_g028480       | .                  | .                  | .                  | . | . |
| .         | .                  | .                  | .                  | .                  | . | . |
| Vv04g0215 | .                  | .                  | .                  | .                  | . | . |
| .         | .                  | .                  | .                  | .                  | . | . |
| Vv04g0216 | .                  | .                  | .                  | .                  | . | . |
| .         | .                  | .                  | .                  | .                  | . | . |
| .         | .                  | .                  | .                  | .                  | . | . |
| Vv04g0217 | .                  | .                  | .                  | .                  | . | . |
| .         | .                  | .                  | .                  | .                  | . | . |
| .         | .                  | .                  | .                  | .                  | . | . |
| Vv04g0218 | Tc01_g016100       | Gorai.013G221400.1 | .                  | .                  | . | . |
| .         | .                  | .                  | .                  | .                  | . | . |
| .         | Vv11g0053          | .                  | .                  | .                  | . | . |
| .         | .                  | .                  | .                  | .                  | . | . |
| Vv04g0219 | .                  | Gorai.001G019200.1 | .                  | .                  | . | . |
| .         | .                  | .                  | .                  | .                  | . | . |
| .         | .                  | .                  | .                  | .                  | . | . |
| Vv04g0220 | .                  | .                  | .                  | .                  | . | . |
| .         | .                  | .                  | .                  | .                  | . | . |
| .         | .                  | .                  | .                  | .                  | . | . |
| Vv04g0221 | .                  | .                  | .                  | .                  | . | . |
| .         | .                  | .                  | .                  | .                  | . | . |
| .         | .                  | .                  | .                  | .                  | . | . |
| Vv04g0222 | .                  | .                  | .                  | .                  | . | . |
| .         | .                  | .                  | .                  | .                  | . | . |



|                    |                    |                    |   |                    |   |   |
|--------------------|--------------------|--------------------|---|--------------------|---|---|
| Vv04g0238          | Tc01_g031900       | .                  | . | .                  | . | . |
| .                  | .                  | .                  | . | .                  | . | . |
| Vv04g0239          | .                  | Gorai.013G218600.1 | . | .                  | . | . |
| Gorai.009G067500.1 | .                  | .                  | . | .                  | . | . |
| .                  | .                  | .                  | . | .                  | . | . |
| Vv04g0240          | .                  | .                  | . | .                  | . | . |
| .                  | .                  | .                  | . | .                  | . | . |
| Vv04g0241          | .                  | Gorai.013G212300.1 | . | Gorai.001G002000.1 | . | . |
| .                  | Gorai.009G067800.1 | .                  | . | .                  | . | . |
| .                  | .                  | .                  | . | .                  | . | . |
| Vv04g0242          | .                  | Gorai.001G001900.1 | . | .                  | . | . |
| Gorai.009G067900.1 | .                  | .                  | . | .                  | . | . |
| .                  | .                  | .                  | . | .                  | . | . |
| Vv04g0243          | .                  | .                  | . | Gorai.009G068000.1 | . | . |
| .                  | .                  | .                  | . | .                  | . | . |
| Vv04g0244          | .                  | .                  | . | .                  | . | . |
| .                  | .                  | .                  | . | .                  | . | . |
| Vv04g0245          | .                  | .                  | . | .                  | . | . |
| .                  | .                  | .                  | . | .                  | . | . |
| Vv04g0246          | Tc01_g006470       | Gorai.013G212200.1 | . | .                  | . | . |
| Gorai.009G068100.1 | .                  | .                  | . | .                  | . | . |
| .                  | .                  | .                  | . | .                  | . | . |
| Vv04g0247          | .                  | .                  | . | .                  | . | . |
| .                  | .                  | .                  | . | .                  | . | . |
| Vv04g0248          | .                  | Gorai.001G001600.1 | . | .                  | . | . |
| Gorai.009G068300.1 | .                  | Vv09g0068          | . | .                  | . | . |
| .                  | .                  | .                  | . | .                  | . | . |
| Vv04g0249          | .                  | .                  | . | .                  | . | . |
| .                  | .                  | .                  | . | .                  | . | . |
| Vv04g0250          | .                  | .                  | . | .                  | . | . |
| .                  | .                  | .                  | . | .                  | . | . |
| Vv04g0251          | Tc01_g015660       | .                  | . | .                  | . | . |
| .                  | .                  | .                  | . | .                  | . | . |
| Vv04g0252          | Tc01_g015650       | .                  | . | .                  | . | . |
| .                  | .                  | .                  | . | .                  | . | . |
| .                  | .                  | .                  | . | .                  | . | . |

|                    |   |                    |                    |   |                    |   |
|--------------------|---|--------------------|--------------------|---|--------------------|---|
| Vv04g0253          | . | .                  | Gorai.001G001500.1 | . | .                  | . |
| Gorai.009G068400.1 | . | .                  | .                  | . | .                  | . |
| .                  | . | .                  | .                  | . | .                  | . |
| .                  | . | .                  | .                  | . | .                  | . |
| Vv04g0254          | . | .                  | Gorai.001G001400.1 | . | .                  | . |
| .                  | . | .                  | .                  | . | .                  | . |
| .                  | . | .                  | .                  | . | .                  | . |
| Vv04g0255          | . | .                  | .                  | . | Gorai.009G068700.1 | . |
| Gorai.010G120400.1 | . | .                  | .                  | . | .                  | . |
| .                  | . | .                  | .                  | . | .                  | . |
| .                  | . | .                  | .                  | . | .                  | . |
| Vv04g0256          | . | Gorai.013G212100.1 | .                  | . | .                  | . |
| Gorai.009G068800.1 | . | .                  | .                  | . | .                  | . |
| .                  | . | .                  | .                  | . | .                  | . |
| .                  | . | .                  | .                  | . | .                  | . |
| Vv04g0257          | . | .                  | .                  | . | Gorai.             | . |
| 010G117400.1       | . | .                  | .                  | . | .                  | . |
| .                  | . | .                  | .                  | . | .                  | . |
| Vv04g0258          | . | .                  | .                  | . | .                  | . |
| .                  | . | .                  | .                  | . | .                  | . |
| .                  | . | .                  | .                  | . | .                  | . |
| Vv04g0259          | . | .                  | .                  | . | .                  | . |
| .                  | . | .                  | .                  | . | .                  | . |
| .                  | . | .                  | .                  | . | .                  | . |
| Vv04g0260          | . | .                  | .                  | . | Gorai.009G068900.1 | . |
| .                  | . | .                  | .                  | . | .                  | . |
| .                  | . | .                  | .                  | . | .                  | . |
| Vv04g0261          | . | .                  | .                  | . | .                  | . |
| .                  | . | .                  | .                  | . | .                  | . |
| .                  | . | .                  | .                  | . | .                  | . |
| Vv04g0262          | . | Gorai.013G212000.1 | .                  | . | .                  | . |
| Gorai.009G069100.1 | . | .                  | .                  | . | .                  | . |
| .                  | . | .                  | .                  | . | .                  | . |
| .                  | . | .                  | .                  | . | .                  | . |
| Vv04g0263          | . | .                  | .                  | . | .                  | . |
| .                  | . | .                  | .                  | . | .                  | . |
| .                  | . | .                  | .                  | . | .                  | . |
| Vv04g0264          | . | .                  | .                  | . | .                  | . |
| .                  | . | .                  | .                  | . | .                  | . |
| .                  | . | .                  | .                  | . | .                  | . |
| Vv04g0265          | . | .                  | .                  | . | .                  | . |
| .                  | . | .                  | .                  | . | .                  | . |
| .                  | . | .                  | .                  | . | .                  | . |
| Vv04g0266          | . | .                  | .                  | . | .                  | . |
| .                  | . | .                  | .                  | . | .                  | . |
| .                  | . | .                  | .                  | . | .                  | . |
| Vv04g0267          | . | .                  | .                  | . | .                  | . |
| .                  | . | .                  | .                  | . | .                  | . |
| .                  | . | .                  | .                  | . | .                  | . |
| Vv04g0268          | . | .                  | .                  | . | .                  | . |



|                    |              |                    |   |   |                    |   |   |
|--------------------|--------------|--------------------|---|---|--------------------|---|---|
| .                  | .            | .                  | . | . | .                  | . | . |
| .                  | .            | .                  | . | . | .                  | . | . |
| Vv04g0269          | .            | .                  | . | . | .                  | . | . |
| .                  | .            | .                  | . | . | .                  | . | . |
| Vv04g0270          | .            | .                  | . | . | .                  | . | . |
| .                  | .            | .                  | . | . | .                  | . | . |
| Vv04g0271          | Tc01_g015160 | .                  | . | . | .                  | . | . |
| .                  | .            | .                  | . | . | .                  | . | . |
| Vv04g0272          | .            | .                  | . | . | Gorai.009G069200.1 | . | . |
| .                  | .            | .                  | . | . | .                  | . | . |
| Vv04g0273          | .            | .                  | . | . | Gorai.009G069300.1 | . | . |
| .                  | .            | .                  | . | . | .                  | . | . |
| Vv04g0274          | Tc01_g006840 | .                  | . | . | .                  | . | . |
| .                  | .            | .                  | . | . | .                  | . | . |
| Vv04g0275          | .            | Gorai.013G211900.1 | . | . | .                  | . | . |
| .                  | .            | .                  | . | . | .                  | . | . |
| Vv04g0276          | .            | .                  | . | . | .                  | . | . |
| .                  | .            | .                  | . | . | .                  | . | . |
| Vv04g0277          | .            | .                  | . | . | .                  | . | . |
| .                  | .            | .                  | . | . | .                  | . | . |
| Vv04g0278          | Tc01_g036480 | .                  | . | . | .                  | . | . |
| .                  | .            | .                  | . | . | .                  | . | . |
| Vv04g0279          | .            | .                  | . | . | .                  | . | . |
| .                  | .            | .                  | . | . | .                  | . | . |
| Vv04g0280          | .            | .                  | . | . | .                  | . | . |
| .                  | .            | .                  | . | . | .                  | . | . |
| Vv04g0281          | .            | .                  | . | . | .                  | . | . |
| .                  | .            | .                  | . | . | .                  | . | . |
| Vv04g0282          | .            | .                  | . | . | Gorai.009G069500.1 | . | . |
| .                  | .            | .                  | . | . | .                  | . | . |
| Vv04g0283          | .            | Gorai.013G211700.1 | . | . | .                  | . | . |
| Gorai.009G069600.1 | .            | .                  | . | . | .                  | . | . |
| .                  | .            | .                  | . | . | .                  | . | . |
| Vv04g0284          | .            | .                  | . | . | .                  | . | . |
| .                  | .            | .                  | . | . | .                  | . | . |

|           |              |                    |   |   |   |   |   |
|-----------|--------------|--------------------|---|---|---|---|---|
| Vv04g0285 | .            | .                  | . | . | . | . | . |
| .         | .            | .                  | . | . | . | . | . |
| Vv04g0286 | .            | .                  | . | . | . | . | . |
| .         | .            | .                  | . | . | . | . | . |
| Vv04g0287 | .            | Gorai.013G211600.1 | . | . | . | . | . |
| .         | .            | .                  | . | . | . | . | . |
| Vv04g0288 | .            | .                  | . | . | . | . | . |
| .         | .            | .                  | . | . | . | . | . |
| Vv04g0289 | .            | .                  | . | . | . | . | . |
| .         | .            | .                  | . | . | . | . | . |
| Vv04g0290 | .            | .                  | . | . | . | . | . |
| .         | .            | .                  | . | . | . | . | . |
| Vv04g0291 | .            | .                  | . | . | . | . | . |
| .         | .            | .                  | . | . | . | . | . |
| Vv04g0292 | .            | .                  | . | . | . | . | . |
| .         | .            | .                  | . | . | . | . | . |
| Vv04g0293 | Tc01_g006900 | .                  | . | . | . | . | . |
| .         | .            | .                  | . | . | . | . | . |
| Vv04g0294 | .            | .                  | . | . | . | . | . |
| .         | .            | .                  | . | . | . | . | . |
| Vv04g0295 | .            | .                  | . | . | . | . | . |
| .         | .            | .                  | . | . | . | . | . |
| Vv04g0296 | .            | .                  | . | . | . | . | . |
| .         | .            | .                  | . | . | . | . | . |
| Vv04g0297 | .            | .                  | . | . | . | . | . |
| .         | .            | .                  | . | . | . | . | . |
| Vv04g0298 | Tc01_g036730 | .                  | . | . | . | . | . |
| .         | .            | .                  | . | . | . | . | . |
| Vv04g0299 | Tc01_g014890 | .                  | . | . | . | . | . |
| .         | .            | .                  | . | . | . | . | . |
| Vv04g0300 | .            | .                  | . | . | . | . | . |
| .         | .            | .                  | . | . | . | . | . |
| Vv04g0301 | .            | .                  | . | . | . | . | . |

|           |              |   |                    |                    |   |   |
|-----------|--------------|---|--------------------|--------------------|---|---|
| .         | .            | . | .                  | .                  | . | . |
| .         | .            | . | .                  | .                  | . | . |
| Vv04g0302 | .            | . | Gorai.001G001300.1 | .                  | . | . |
| .         | .            | . | .                  | .                  | . | . |
| .         | .            | . | .                  | .                  | . | . |
| Vv04g0303 | Tc01_g036080 | . | .                  | .                  | . | . |
| .         | .            | . | .                  | .                  | . | . |
| .         | .            | . | .                  | .                  | . | . |
| Vv04g0304 | .            | . | .                  | .                  | . | . |
| .         | .            | . | .                  | .                  | . | . |
| .         | .            | . | .                  | .                  | . | . |
| Vv04g0305 | .            | . | .                  | .                  | . | . |
| .         | .            | . | .                  | .                  | . | . |
| .         | .            | . | .                  | .                  | . | . |
| Vv04g0306 | .            | . | .                  | .                  | . | . |
| .         | .            | . | .                  | .                  | . | . |
| .         | .            | . | .                  | .                  | . | . |
| Vv04g0307 | .            | . | .                  | Gorai.009G069800.1 | . | . |
| .         | .            | . | .                  | .                  | . | . |
| .         | .            | . | .                  | .                  | . | . |
| Vv04g0308 | .            | . | .                  | .                  | . | . |
| .         | .            | . | .                  | .                  | . | . |
| .         | .            | . | .                  | .                  | . | . |
| Vv04g0309 | .            | . | .                  | .                  | . | . |
| .         | .            | . | .                  | .                  | . | . |
| .         | .            | . | .                  | .                  | . | . |
| Vv04g0310 | .            | . | .                  | .                  | . | . |
| .         | .            | . | .                  | .                  | . | . |
| .         | .            | . | .                  | .                  | . | . |
| Vv04g0311 | .            | . | .                  | .                  | . | . |
| .         | .            | . | .                  | .                  | . | . |
| .         | .            | . | .                  | .                  | . | . |
| Vv04g0312 | .            | . | Gorai.001G001100.1 | .                  | . | . |
| .         | .            | . | .                  | .                  | . | . |
| .         | .            | . | .                  | .                  | . | . |
| Vv04g0313 | .            | . | .                  | .                  | . | . |
| .         | .            | . | .                  | .                  | . | . |
| .         | .            | . | .                  | .                  | . | . |
| Vv04g0314 | .            | . | .                  | .                  | . | . |
| .         | .            | . | .                  | .                  | . | . |
| .         | .            | . | .                  | .                  | . | . |
| Vv04g0315 | .            | . | Gorai.001G001000.1 | .                  | . | . |
| .         | .            | . | .                  | .                  | . | . |
| .         | .            | . | .                  | .                  | . | . |
| Vv04g0316 | .            | . | .                  | .                  | . | . |
| .         | .            | . | .                  | .                  | . | . |
| .         | .            | . | .                  | .                  | . | . |
| Vv04g0317 | .            | . | .                  | .                  | . | . |
| .         | .            | . | .                  | .                  | . | . |
| .         | .            | . | .                  | .                  | . | . |

|                    |                    |                    |                    |
|--------------------|--------------------|--------------------|--------------------|
| Vv04g0318          | Tc09_g027780       | Gorai.013G211400.1 | Gorai.             |
| 001G000400.1       | .                  | .                  | .                  |
| .                  | .                  | .                  | .                  |
| Vv04g0319          | .                  | .                  | .                  |
| .                  | .                  | .                  | .                  |
| Vv04g0320          | Tc01_g035020       | Gorai.013G208600.1 | .                  |
| .                  | .                  | .                  | .                  |
| Vv04g0321          | .                  | Gorai.013G219400.1 | .                  |
| .                  | .                  | .                  | .                  |
| Vv04g0322          | .                  | Gorai.013G219300.1 | Gorai.001G008600.1 |
| .                  | .                  | Vv11g0334          | Tc09_g009090       |
| Gorai.013G219400.1 | .                  | Gorai.001G008600.1 | .                  |
| .                  | .                  | .                  | .                  |
| Vv04g0323          | .                  | Gorai.001G026500.1 | .                  |
| Gorai.009G048900.1 | .                  | Gorai.010G105600.1 | .                  |
| .                  | .                  | .                  | .                  |
| Vv04g0324          | .                  | .                  | Gorai.003G062800.1 |
| Gorai.011G072300.1 | .                  | Vv09g0350          | .                  |
| .                  | Gorai.011G072300.1 | .                  | .                  |
| .                  | .                  | .                  | .                  |
| Vv04g0325          | Tc01_g007200       | .                  | .                  |
| .                  | .                  | .                  | .                  |
| Vv04g0326          | .                  | .                  | .                  |
| .                  | .                  | .                  | .                  |
| Vv04g0327          | .                  | .                  | Gorai.009G049100.1 |
| .                  | .                  | .                  | .                  |
| Vv04g0328          | Tc01_g036690       | .                  | Gorai.001G026800.1 |
| .                  | Gorai.010G105900.1 | .                  | Vv09g0352          |
| Tc06_g007710       | .                  | .                  | .                  |
| .                  | .                  | .                  | .                  |
| Vv04g0329          | .                  | .                  | Gorai.009G049200.1 |
| .                  | .                  | .                  | .                  |
| Vv04g0330          | Tc01_g015300       | .                  | Gorai.004G288400.1 |
| Gorai.009G049300.1 | .                  | Gorai.011G072500.1 | Vv09g0353          |
| Tc06_g007740       | .                  | Gorai.010G230500.1 | .                  |
| Gorai.011G072500.1 | .                  | .                  | .                  |
| .                  | .                  | .                  | .                  |
| Vv04g0331          | .                  | .                  | .                  |
| .                  | .                  | .                  | .                  |
| Vv04g0332          | .                  | .                  | Gorai.009G049500.1 |

|                    |                    |                    |                    |                    |   |           |   |
|--------------------|--------------------|--------------------|--------------------|--------------------|---|-----------|---|
| .                  | .                  | .                  | .                  | .                  | . | .         | . |
| .                  | .                  | .                  | .                  | .                  | . | .         | . |
| Vv04g0333          | .                  | .                  | .                  | .                  | . | Gorai.    | . |
| 010G106200.1       | .                  | .                  | .                  | .                  | . | .         | . |
| .                  | .                  | .                  | .                  | .                  | . | .         | . |
| Vv04g0334          | .                  | .                  | .                  | .                  | . | .         | . |
| .                  | .                  | .                  | .                  | .                  | . | .         | . |
| .                  | .                  | .                  | .                  | .                  | . | .         | . |
| Vv04g0335          | .                  | .                  | Gorai.001G026900.1 | .                  | . | .         | . |
| .                  | .                  | .                  | .                  | .                  | . | .         | . |
| .                  | .                  | .                  | .                  | .                  | . | .         | . |
| Vv04g0336          | .                  | .                  | .                  | .                  | . | Gorai.    | . |
| 010G106300.1       | .                  | .                  | .                  | .                  | . | .         | . |
| .                  | .                  | .                  | .                  | .                  | . | .         | . |
| Vv04g0337          | .                  | Gorai.013G219200.1 | .                  | Gorai.001G008200.1 | . | .         | . |
| Gorai.004G288600.1 | .                  | Gorai.009G049700.1 | .                  | .                  | . | .         | . |
| .                  | .                  | .                  | .                  | .                  | . | Vv11g0340 | . |
| Tc09_g009150       | .                  | Gorai.013G219200.1 | .                  | Gorai.001G008200.1 | . | .         | . |
| .                  | Gorai.009G027200.1 | .                  | Gorai.010G075600.1 | .                  | . | .         | . |
| Vv04g0338          | .                  | .                  | .                  | Gorai.009G049900.1 | . | .         | . |
| .                  | .                  | .                  | .                  | .                  | . | .         | . |
| .                  | .                  | .                  | .                  | .                  | . | .         | . |
| Vv04g0339          | Tc01_g038590       | .                  | Gorai.001G027000.1 | .                  | . | .         | . |
| .                  | Gorai.010G106400.1 | .                  | .                  | .                  | . | .         | . |
| .                  | .                  | .                  | .                  | .                  | . | .         | . |
| .                  | .                  | .                  | .                  | .                  | . | .         | . |
| Vv04g0340          | Tc01_g038640       | .                  | Gorai.001G008100.1 | .                  | . | .         | . |
| Gorai.004G281600.1 | Gorai.009G050200.1 | .                  | Gorai.010G106600.1 | .                  | . | .         | . |
| .                  | .                  | .                  | .                  | .                  | . | .         | . |
| .                  | .                  | .                  | .                  | .                  | . | .         | . |
| Vv04g0341          | .                  | .                  | Gorai.004G289900.1 | .                  | . | .         | . |
| Gorai.010G107100.1 | .                  | .                  | .                  | .                  | . | .         | . |
| .                  | .                  | .                  | .                  | .                  | . | .         | . |
| .                  | .                  | .                  | .                  | .                  | . | .         | . |
| Vv04g0342          | .                  | .                  | .                  | .                  | . | .         | . |
| .                  | .                  | .                  | .                  | .                  | . | Vv11g0344 | . |
| Tc09_g009190       | Gorai.013G219000.1 | .                  | .                  | .                  | . | .         | . |
| Gorai.009G059200.1 | .                  | .                  | .                  | .                  | . | .         | . |
| Vv04g0343          | Gorai.013G219000.1 | .                  | Gorai.001G007900.1 | .                  | . | .         | . |
| .                  | Gorai.010G107300.1 | .                  | .                  | .                  | . | .         | . |
| .                  | .                  | .                  | .                  | .                  | . | .         | . |
| .                  | .                  | .                  | .                  | .                  | . | .         | . |
| Tc09_g009200       | Gorai.013G216000.1 | .                  | Vv11g0345          | .                  | . | .         | . |
| Gorai.009G059300.1 | .                  | Gorai.001G007900.1 | .                  | .                  | . | .         | . |
| Vv04g0344          | .                  | .                  | .                  | .                  | . | .         | . |
| .                  | .                  | .                  | .                  | .                  | . | .         | . |
| .                  | .                  | .                  | .                  | .                  | . | .         | . |
| Vv04g0345          | Tc01_g034910       | Gorai.013G218900.1 | .                  | .                  | . | .         | . |
| .                  | Gorai.010G107600.1 | .                  | .                  | .                  | . | .         | . |
| .                  | .                  | .                  | .                  | .                  | . | .         | . |
| .                  | .                  | .                  | .                  | .                  | . | .         | . |
| .                  | .                  | .                  | .                  | .                  | . | .         | . |

|                    |                    |                    |   |                    |                    |   |   |
|--------------------|--------------------|--------------------|---|--------------------|--------------------|---|---|
| Vv04g0346          | .                  | .                  | . | .                  | .                  | . | . |
| .                  | .                  | .                  | . | .                  | .                  | . | . |
| Vv04g0347          | .                  | .                  | . | .                  | .                  | . | . |
| .                  | .                  | .                  | . | .                  | .                  | . | . |
| Vv04g0348          | .                  | .                  | . | .                  | Gorai.009G050300.1 | . | . |
| .                  | .                  | .                  | . | .                  | .                  | . | . |
| Vv04g0349          | Tc01_g001470       | .                  | . | .                  | .                  | . | . |
| .                  | .                  | .                  | . | .                  | .                  | . | . |
| Vv04g0350          | Tc09_g027340       | .                  | . | .                  | .                  | . | . |
| Gorai.010G107700.1 | .                  | .                  | . | .                  | .                  | . | . |
| .                  | .                  | .                  | . | .                  | .                  | . | . |
| Vv04g0351          | Tc01_g039570       | .                  | . | .                  | .                  | . | . |
| .                  | .                  | .                  | . | .                  | .                  | . | . |
| Vv04g0352          | .                  | .                  | . | .                  | .                  | . | . |
| .                  | .                  | .                  | . | .                  | .                  | . | . |
| Vv04g0353          | .                  | .                  | . | .                  | .                  | . | . |
| .                  | .                  | .                  | . | .                  | .                  | . | . |
| Vv04g0354          | Tc01_g039590       | .                  | . | Gorai.004G281500.1 | .                  | . | . |
| .                  | .                  | .                  | . | .                  | .                  | . | . |
| Vv04g0355          | Tc01_g007270       | Gorai.013G218800.1 | . | .                  | .                  | . | . |
| .                  | Gorai.010G107800.1 | .                  | . | .                  | .                  | . | . |
| .                  | .                  | .                  | . | .                  | .                  | . | . |
| Vv04g0356          | .                  | .                  | . | .                  | .                  | . | . |
| .                  | .                  | .                  | . | .                  | .                  | . | . |
| Vv04g0357          | Tc01_g001220       | .                  | . | Gorai.             | .                  | . | . |
| 003G064000.1       | Gorai.010G107900.1 | Vv09g0374          | . | .                  | .                  | . | . |
| Tc06_g007990       | .                  | .                  | . | .                  | .                  | . | . |
| .                  | .                  | .                  | . | .                  | .                  | . | . |
| Vv04g0358          | .                  | .                  | . | .                  | .                  | . | . |
| .                  | .                  | .                  | . | .                  | .                  | . | . |
| Vv04g0359          | .                  | .                  | . | Gorai.004G281400.1 | .                  | . | . |
| Gorai.010G108000.1 | .                  | .                  | . | .                  | .                  | . | . |
| .                  | Vv11g0352          | Tc09_g009270       | . | .                  | .                  | . | . |
| Gorai.004G281400.1 | Gorai.009G026900.1 | Gorai.             | . | .                  | .                  | . | . |
| 010G074500.1       | .                  | .                  | . | .                  | .                  | . | . |
| Vv04g0360          | .                  | .                  | . | Gorai.009G050400.1 | .                  | . | . |
| .                  | .                  | .                  | . | .                  | .                  | . | . |
| Vv04g0361          | .                  | .                  | . | Gorai.004G281000.1 | .                  | . | . |

|                    |                    |                    |                    |        |
|--------------------|--------------------|--------------------|--------------------|--------|
| Vv11g0358          | Tc09_g009350       | .                  | .                  | Gorai. |
| 004G281000.1       | .                  | .                  | .                  | .      |
| Vv04g0362          | Tc01_g015360       | .                  | .                  | .      |
| .                  | .                  | .                  | .                  | .      |
| Vv11g0369          | .                  | .                  | .                  | .      |
| Vv04g0363          | .                  | .                  | .                  | .      |
| Vv09g0385          | Tc06_g008150       | .                  | .                  | .      |
| Vv11g0370          | .                  | .                  | .                  | .      |
| Vv04g0364          | .                  | Gorai.001G006700.1 | .                  | .      |
| .                  | .                  | .                  | .                  | .      |
| Vv04g0365          | .                  | Gorai.001G027200.1 | .                  | .      |
| Gorai.009G050600.1 | .                  | .                  | .                  | .      |
| .                  | .                  | .                  | .                  | .      |
| Vv04g0366          | Tc01_g005590       | .                  | Gorai.004G278000.1 | .      |
| .                  | .                  | .                  | .                  | .      |
| Vv04g0367          | .                  | Gorai.013G218700.1 | Gorai.             | .      |
| 004G290400.1       | .                  | Gorai.010G108200.1 | .                  | .      |
| .                  | .                  | .                  | .                  | .      |
| Vv04g0368          | .                  | .                  | .                  | .      |
| .                  | .                  | .                  | .                  | .      |
| Vv04g0369          | .                  | Gorai.001G027500.1 | .                  | .      |
| .                  | .                  | .                  | .                  | .      |
| Vv04g0370          | .                  | Gorai.001G027600.1 | .                  | .      |
| .                  | Vv09g0391          | .                  | .                  | .      |
| Vv04g0371          | .                  | Gorai.001G006500.1 | .                  | .      |
| Gorai.011G074200.1 | .                  | .                  | .                  | .      |
| .                  | Vv11g0376          | Tc09_g009530       | .                  | .      |
| Gorai.001G006500.1 | .                  | Gorai.009G025900.1 | Gorai.             | .      |
| 010G073200.1       | .                  | .                  | .                  | .      |
| Vv04g0372          | .                  | .                  | Gorai.             | .      |
| 010G108500.1       | .                  | .                  | .                  | .      |
| .                  | .                  | .                  | .                  | .      |
| Vv04g0373          | .                  | Gorai.001G003700.1 | .                  | .      |
| Gorai.010G108600.1 | .                  | .                  | .                  | .      |
| .                  | .                  | .                  | .                  | .      |
| Vv04g0374          | .                  | .                  | .                  | .      |
| .                  | .                  | .                  | .                  | .      |
| Vv04g0375          | .                  | Gorai.001G027900.1 | Gorai.             | .      |
| 004G290500.1       | Gorai.010G108800.1 | .                  | .                  | .      |
| .                  | .                  | .                  | .                  | .      |

|                    |                    |   |   |   |   |                    |
|--------------------|--------------------|---|---|---|---|--------------------|
| Vv04g0376          | .                  | . | . | . | . | Gorai.             |
| 010G108900.1       | .                  | . | . | . | . | .                  |
| Vv04g0377          | .                  | . | . | . | . | Gorai.009G051200.1 |
| .                  | .                  | . | . | . | . | .                  |
| Vv04g0378          | .                  | . | . | . | . | .                  |
| .                  | .                  | . | . | . | . | .                  |
| Vv04g0379          | .                  | . | . | . | . | Gorai.001G028100.1 |
| .                  | .                  | . | . | . | . | .                  |
| Vv11g0381          | Tc09_g009580       | . | . | . | . | Gorai.001G028000.1 |
| .                  | Gorai.009G060500.1 | . | . | . | . | Gorai.010G072900.1 |
| Vv04g0380          | .                  | . | . | . | . | Gorai.001G028200.1 |
| .                  | .                  | . | . | . | . | .                  |
| Vv04g0381          | Tc01_g005710       | . | . | . | . | .                  |
| .                  | .                  | . | . | . | . | .                  |
| Vv04g0382          | .                  | . | . | . | . | .                  |
| .                  | .                  | . | . | . | . | Vv11g0383          |
| Vv04g0383          | .                  | . | . | . | . | Gorai.001G028200.1 |
| .                  | .                  | . | . | . | . | .                  |
| Vv04g0384          | .                  | . | . | . | . | Gorai.001G028400.1 |
| .                  | .                  | . | . | . | . | .                  |
| Vv04g0385          | .                  | . | . | . | . | Gorai.001G028600.1 |
| 004G290600.1       | .                  | . | . | . | . | Gorai.             |
| .                  | .                  | . | . | . | . | .                  |
| Vv04g0386          | .                  | . | . | . | . | Gorai.001G028700.1 |
| Gorai.009G051700.1 | .                  | . | . | . | . | Vv09g0398          |
| .                  | Gorai.011G018500.1 | . | . | . | . | .                  |
| .                  | .                  | . | . | . | . | .                  |
| Vv04g0387          | .                  | . | . | . | . | Gorai.009G051800.1 |
| .                  | .                  | . | . | . | . | .                  |
| Vv04g0388          | Tc01_g039720       | . | . | . | . | .                  |
| .                  | .                  | . | . | . | . | .                  |
| Vv04g0389          | Tc01_g039880       | . | . | . | . | .                  |
| .                  | .                  | . | . | . | . | .                  |
| Vv04g0390          | .                  | . | . | . | . | Gorai.004G290800.1 |
| .                  | .                  | . | . | . | . | .                  |
| Vv11g0393          | Tc09_g009680       | . | . | . | . | .                  |
| Gorai.009G025400.1 | Gorai.010G072100.1 | . | . | . | . | .                  |



|                    |                    |                    |                    |                    |                    |   |   |
|--------------------|--------------------|--------------------|--------------------|--------------------|--------------------|---|---|
| Vv04g0391          | .                  | .                  | .                  | .                  | .                  | . | . |
| .                  | .                  | .                  | .                  | .                  | .                  | . | . |
| Vv04g0392          | .                  | .                  | .                  | Gorai.004G290900.1 | .                  | . | . |
| .                  | .                  | .                  | .                  | .                  | .                  | . | . |
| Vv04g0393          | .                  | .                  | .                  | .                  | .                  | . | . |
| .                  | .                  | .                  | .                  | .                  | .                  | . | . |
| Vv04g0394          | .                  | .                  | .                  | Gorai.001G028800.1 | .                  | . | . |
| Gorai.009G051900.1 | .                  | Gorai.011G074900.1 | .                  | Vv09g0416          | .                  | . | . |
| .                  | .                  | .                  | Gorai.011G074900.1 | .                  | .                  | . | . |
| .                  | .                  | .                  | .                  | .                  | .                  | . | . |
| Vv04g0395          | .                  | .                  | .                  | .                  | .                  | . | . |
| .                  | .                  | .                  | .                  | .                  | .                  | . | . |
| .                  | .                  | .                  | .                  | .                  | .                  | . | . |
| Vv04g0396          | .                  | .                  | .                  | Gorai.001G028900.1 | .                  | . | . |
| Gorai.009G052000.1 | .                  | Gorai.010G109400.1 | .                  | .                  | .                  | . | . |
| .                  | .                  | .                  | .                  | Vv11g0403          | .                  | . | . |
| Tc09_g009820       | .                  | Gorai.001G028900.1 | .                  | .                  | Gorai.             | . | . |
| 009G024800.1       | Gorai.010G071100.1 | .                  | .                  | .                  | .                  | . | . |
| Vv04g0397          | .                  | .                  | .                  | .                  | .                  | . | . |
| .                  | .                  | .                  | .                  | .                  | .                  | . | . |
| .                  | .                  | .                  | .                  | .                  | .                  | . | . |
| Vv04g0398          | .                  | .                  | .                  | .                  | .                  | . | . |
| .                  | .                  | .                  | .                  | .                  | .                  | . | . |
| .                  | .                  | .                  | .                  | .                  | .                  | . | . |
| Vv04g0399          | .                  | .                  | .                  | .                  | .                  | . | . |
| .                  | .                  | .                  | .                  | .                  | .                  | . | . |
| .                  | .                  | .                  | .                  | .                  | .                  | . | . |
| Vv04g0400          | .                  | .                  | .                  | .                  | .                  | . | . |
| .                  | .                  | .                  | .                  | .                  | .                  | . | . |
| .                  | .                  | .                  | .                  | .                  | .                  | . | . |
| Vv04g0401          | .                  | .                  | .                  | .                  | Gorai.009G052100.1 | . | . |
| .                  | .                  | .                  | .                  | .                  | .                  | . | . |
| .                  | .                  | .                  | .                  | .                  | .                  | . | . |
| Vv04g0402          | .                  | .                  | .                  | .                  | .                  | . | . |
| .                  | .                  | .                  | .                  | .                  | .                  | . | . |
| .                  | .                  | .                  | .                  | .                  | .                  | . | . |
| Vv04g0403          | .                  | Gorai.013G218600.1 | .                  | .                  | .                  | . | . |
| .                  | .                  | .                  | .                  | .                  | .                  | . | . |
| .                  | .                  | .                  | .                  | .                  | .                  | . | . |
| Vv04g0404          | .                  | .                  | .                  | .                  | .                  | . | . |
| .                  | .                  | .                  | .                  | .                  | .                  | . | . |
| .                  | .                  | .                  | .                  | .                  | .                  | . | . |
| Vv04g0405          | .                  | .                  | .                  | .                  | .                  | . | . |
| .                  | .                  | .                  | .                  | .                  | .                  | . | . |
| .                  | .                  | .                  | .                  | .                  | .                  | . | . |
| Vv04g0406          | .                  | .                  | .                  | .                  | .                  | . | . |
| .                  | .                  | .                  | .                  | .                  | .                  | . | . |

|           |   |   |   |   |                    |   |   |   |
|-----------|---|---|---|---|--------------------|---|---|---|
| Vv04g0407 | . | . | . | . | Gorai.009G052200.1 | . | . | . |
| .         | . | . | . | . | .                  | . | . | . |
| Vv04g0408 | . | . | . | . | .                  | . | . | . |
| .         | . | . | . | . | .                  | . | . | . |
| Vv04g0409 | . | . | . | . | .                  | . | . | . |
| .         | . | . | . | . | .                  | . | . | . |
| Vv04g0410 | . | . | . | . | .                  | . | . | . |
| .         | . | . | . | . | .                  | . | . | . |
| Vv04g0411 | . | . | . | . | .                  | . | . | . |
| .         | . | . | . | . | .                  | . | . | . |
| Vv04g0412 | . | . | . | . | .                  | . | . | . |
| .         | . | . | . | . | .                  | . | . | . |
| Vv04g0413 | . | . | . | . | .                  | . | . | . |
| .         | . | . | . | . | .                  | . | . | . |
| Vv04g0414 | . | . | . | . | .                  | . | . | . |
| .         | . | . | . | . | .                  | . | . | . |
| Vv04g0415 | . | . | . | . | .                  | . | . | . |
| .         | . | . | . | . | .                  | . | . | . |
| Vv04g0416 | . | . | . | . | .                  | . | . | . |
| .         | . | . | . | . | .                  | . | . | . |
| Vv04g0417 | . | . | . | . | .                  | . | . | . |
| .         | . | . | . | . | .                  | . | . | . |
| Vv04g0418 | . | . | . | . | .                  | . | . | . |
| .         | . | . | . | . | .                  | . | . | . |
| Vv04g0419 | . | . | . | . | .                  | . | . | . |
| .         | . | . | . | . | .                  | . | . | . |
| Vv04g0420 | . | . | . | . | .                  | . | . | . |
| .         | . | . | . | . | .                  | . | . | . |
| Vv04g0421 | . | . | . | . | .                  | . | . | . |
| .         | . | . | . | . | .                  | . | . | . |
| Vv04g0422 | . | . | . | . | .                  | . | . | . |
| .         | . | . | . | . | .                  | . | . | . |
| Vv04g0423 | . | . | . | . | .                  | . | . | . |

|                    |              |   |                    |   |   |                    |   |
|--------------------|--------------|---|--------------------|---|---|--------------------|---|
| .                  | .            | . | .                  | . | . | .                  | . |
| .                  | .            | . | .                  | . | . | .                  | . |
| Vv04g0424          | .            | . | .                  | . | . | .                  | . |
| .                  | .            | . | .                  | . | . | .                  | . |
| Vv04g0425          | .            | . | .                  | . | . | .                  | . |
| .                  | .            | . | .                  | . | . | .                  | . |
| Vv04g0426          | .            | . | .                  | . | . | .                  | . |
| .                  | .            | . | .                  | . | . | .                  | . |
| Vv04g0427          | .            | . | .                  | . | . | .                  | . |
| .                  | .            | . | .                  | . | . | Vv11g0405          | . |
| Vv04g0428          | .            | . | .                  | . | . | .                  | . |
| .                  | .            | . | .                  | . | . | .                  | . |
| Vv04g0429          | .            | . | .                  | . | . | .                  | . |
| .                  | .            | . | .                  | . | . | .                  | . |
| Vv04g0430          | .            | . | .                  | . | . | .                  | . |
| .                  | .            | . | .                  | . | . | .                  | . |
| Vv04g0431          | .            | . | .                  | . | . | .                  | . |
| Gorai.009G052400.1 | .            | . | Gorai.001G029000.1 | . | . | .                  | . |
| .                  | .            | . | .                  | . | . | .                  | . |
| .                  | .            | . | .                  | . | . | .                  | . |
| Vv04g0432          | .            | . | .                  | . | . | Gorai.009G052500.1 | . |
| .                  | Vv09g0437    | . | Tc06_g008660       | . | . | .                  | . |
| .                  | .            | . | .                  | . | . | .                  | . |
| Vv04g0433          | .            | . | .                  | . | . | .                  | . |
| .                  | .            | . | .                  | . | . | .                  | . |
| Vv04g0434          | .            | . | Gorai.013G218300.1 | . | . | .                  | . |
| Gorai.009G052700.1 | .            | . | .                  | . | . | .                  | . |
| .                  | .            | . | .                  | . | . | .                  | . |
| Vv04g0435          | .            | . | .                  | . | . | .                  | . |
| .                  | .            | . | .                  | . | . | .                  | . |
| Vv04g0436          | .            | . | .                  | . | . | .                  | . |
| 009G052800.1       | Tc01_g035520 | . | .                  | . | . | Gorai.             | . |
| .                  | .            | . | .                  | . | . | .                  | . |
| Vv04g0437          | .            | . | .                  | . | . | .                  | . |
| .                  | .            | . | .                  | . | . | .                  | . |
| Vv04g0438          | .            | . | .                  | . | . | .                  | . |
| .                  | .            | . | .                  | . | . | .                  | . |
| .                  | .            | . | .                  | . | . | .                  | . |



|                    |              |                    |                    |                    |                    |   |
|--------------------|--------------|--------------------|--------------------|--------------------|--------------------|---|
|                    | Tc09_g010160 | .                  | .                  | .                  | Gorai.009G023200.1 | . |
| Vv04g0456          | .            | .                  | .                  | .                  | .                  | . |
| Vv04g0457          | .            | .                  | .                  | .                  | .                  | . |
| Vv04g0458          | .            | .                  | .                  | .                  | .                  | . |
| Vv09g0445          | .            | .                  | .                  | .                  | .                  | . |
| Vv04g0459          | .            | .                  | .                  | Gorai.004G279500.1 | .                  | . |
| Gorai.009G115200.1 | Vv09g0461    | Tc06_g000240       | .                  | .                  | .                  | . |
| Vv04g0460          | .            | .                  | .                  | .                  | .                  | . |
| Vv04g0461          | .            | .                  | .                  | .                  | .                  | . |
| Vv09g0552          | .            | .                  | .                  | Gorai.011G079400.1 | .                  | . |
| Vv04g0462          | .            | .                  | .                  | .                  | .                  | . |
| Vv04g0463          | .            | .                  | .                  | .                  | .                  | . |
| Vv04g0464          | .            | .                  | .                  | .                  | .                  | . |
| Vv04g0465          | .            | .                  | .                  | .                  | .                  | . |
| Vv04g0466          | .            | Gorai.013G218200.1 | .                  | .                  | .                  | . |
| Vv04g0467          | .            | .                  | .                  | .                  | .                  | . |
| Vv04g0468          | .            | .                  | .                  | Gorai.009G052900.1 | .                  | . |
| Vv04g0469          | .            | .                  | Gorai.001G029300.1 | .                  | .                  | . |
| Vv04g0470          | Tc01_g026460 | .                  | .                  | .                  | .                  | . |
| Vv04g0471          | Tc01_g013210 | .                  | .                  | .                  | .                  | . |

|           |              |                    |   |                    |   |   |   |
|-----------|--------------|--------------------|---|--------------------|---|---|---|
| Vv04g0472 | .            | .                  | . | .                  | . | . | . |
| .         | .            | .                  | . | .                  | . | . | . |
| Vv04g0473 | .            | .                  | . | .                  | . | . | . |
| .         | .            | .                  | . | .                  | . | . | . |
| Vv04g0474 | .            | .                  | . | .                  | . | . | . |
| .         | .            | .                  | . | .                  | . | . | . |
| Vv04g0475 | .            | .                  | . | .                  | . | . | . |
| .         | .            | .                  | . | .                  | . | . | . |
| Vv04g0476 | Tc01_g034110 | .                  | . | .                  | . | . | . |
| .         | .            | .                  | . | .                  | . | . | . |
| Vv04g0477 | .            | .                  | . | .                  | . | . | . |
| .         | .            | .                  | . | .                  | . | . | . |
| Vv04g0478 | .            | .                  | . | .                  | . | . | . |
| .         | .            | .                  | . | .                  | . | . | . |
| Vv04g0479 | Tc01_g034060 | .                  | . | .                  | . | . | . |
| .         | .            | .                  | . | .                  | . | . | . |
| Vv04g0480 | Tc01_g029250 | Gorai.013G232500.1 | . | .                  | . | . | . |
| .         | .            | .                  | . | .                  | . | . | . |
| Vv04g0481 | Tc01_g033850 | .                  | . | Gorai.004G278700.1 | . | . | . |
| .         | .            | .                  | . | .                  | . | . | . |
| Vv04g0482 | .            | .                  | . | .                  | . | . | . |
| .         | .            | .                  | . | .                  | . | . | . |
| Vv04g0483 | .            | .                  | . | .                  | . | . | . |
| .         | .            | .                  | . | .                  | . | . | . |
| Vv04g0484 | .            | .                  | . | .                  | . | . | . |
| .         | .            | .                  | . | .                  | . | . | . |
| Vv04g0485 | .            | .                  | . | .                  | . | . | . |
| .         | .            | .                  | . | .                  | . | . | . |
| Vv04g0486 | .            | .                  | . | .                  | . | . | . |
| .         | .            | .                  | . | .                  | . | . | . |
| Vv04g0487 | .            | .                  | . | .                  | . | . | . |
| Vv09g0559 | .            | .                  | . | .                  | . | . | . |
| .         | .            | .                  | . | .                  | . | . | . |
| Vv04g0488 | .            | .                  | . | .                  | . | . | . |

|              |              |   |   |   |   |           |   |
|--------------|--------------|---|---|---|---|-----------|---|
| .            | .            | . | . | . | . | .         | . |
| .            | .            | . | . | . | . | .         | . |
| Vv04g0489    | .            | . | . | . | . | .         | . |
| .            | .            | . | . | . | . | .         | . |
| Vv04g0490    | Tc01_g028380 | . | . | . | . | .         | . |
| .            | .            | . | . | . | . | .         | . |
| Vv04g0491    | Tc01_g013540 | . | . | . | . | .         | . |
| .            | .            | . | . | . | . | .         | . |
| Vv04g0492    | .            | . | . | . | . | .         | . |
| .            | .            | . | . | . | . | .         | . |
| .            | Tc09_g010300 | . | . | . | . | Vv11g0457 | . |
| 010G068700.1 | .            | . | . | . | . | Gorai.    | . |
| Vv04g0493    | .            | . | . | . | . | .         | . |
| .            | .            | . | . | . | . | .         | . |
| .            | .            | . | . | . | . | .         | . |
| Vv04g0494    | .            | . | . | . | . | .         | . |
| .            | .            | . | . | . | . | .         | . |
| Vv04g0495    | .            | . | . | . | . | .         | . |
| .            | .            | . | . | . | . | .         | . |
| Vv04g0496    | .            | . | . | . | . | .         | . |
| .            | .            | . | . | . | . | .         | . |
| Vv04g0497    | .            | . | . | . | . | .         | . |
| .            | .            | . | . | . | . | .         | . |
| Vv04g0498    | .            | . | . | . | . | .         | . |
| .            | .            | . | . | . | . | .         | . |
| Vv04g0499    | .            | . | . | . | . | .         | . |
| .            | .            | . | . | . | . | .         | . |
| Vv04g0500    | Tc01_g026220 | . | . | . | . | .         | . |
| .            | .            | . | . | . | . | .         | . |
| Vv04g0501    | .            | . | . | . | . | .         | . |
| .            | .            | . | . | . | . | .         | . |
| Vv04g0502    | .            | . | . | . | . | .         | . |
| .            | .            | . | . | . | . | .         | . |
| Vv04g0503    | .            | . | . | . | . | .         | . |
| .            | .            | . | . | . | . | .         | . |
| Vv04g0504    | Tc01_g029300 | . | . | . | . | .         | . |
| .            | .            | . | . | . | . | .         | . |

|                    |                    |                    |                    |   |                    |   |
|--------------------|--------------------|--------------------|--------------------|---|--------------------|---|
| Vv04g0505          | Tc09_g018160       | .                  | .                  | . | .                  | . |
| .                  | .                  | .                  | .                  | . | .                  | . |
| Vv04g0506          | Tc01_g033570       | .                  | .                  | . | .                  | . |
| .                  | .                  | .                  | .                  | . | .                  | . |
| Vv04g0507          | .                  | .                  | .                  | . | .                  | . |
| .                  | .                  | .                  | .                  | . | .                  | . |
| Vv04g0508          | .                  | .                  | .                  | . | .                  | . |
| .                  | .                  | .                  | .                  | . | .                  | . |
| Vv04g0509          | .                  | .                  | .                  | . | .                  | . |
| .                  | .                  | .                  | .                  | . | .                  | . |
| Vv04g0510          | Tc01_g007860       | .                  | .                  | . | .                  | . |
| .                  | .                  | .                  | .                  | . | .                  | . |
| Vv04g0511          | Tc01_g007840       | .                  | .                  | . | .                  | . |
| .                  | .                  | .                  | .                  | . | .                  | . |
| Vv04g0512          | .                  | .                  | .                  | . | .                  | . |
| .                  | .                  | .                  | .                  | . | .                  | . |
| 010G227500.1       | Vv09g0567          | Tc06_g006590       | Gorai.004G274500.1 | . | Gorai.             | . |
| Tc09_g010730       | .                  | .                  | Vv11g0493          | . | .                  | . |
| Vv04g0513          | Tc09_g003920       | Gorai.013G232800.1 | Gorai.009G010600.1 | . | .                  | . |
| 001G029400.1       | Gorai.004G278500.1 | .                  | .                  | . | .                  | . |
| .                  | .                  | .                  | .                  | . | .                  | . |
| Vv04g0514          | .                  | .                  | .                  | . | .                  | . |
| .                  | .                  | .                  | .                  | . | .                  | . |
| Vv04g0515          | Tc09_g017500       | .                  | .                  | . | .                  | . |
| Gorai.011G080200.1 | Vv09g0574          | .                  | .                  | . | Gorai.             | . |
| 010G227400.1       | Gorai.011G080100.1 | .                  | .                  | . | .                  | . |
| .                  | .                  | .                  | .                  | . | .                  | . |
| Vv04g0516          | Tc01_g039340       | .                  | .                  | . | Gorai.004G278300.1 | . |
| .                  | .                  | .                  | .                  | . | .                  | . |
| Vv04g0517          | .                  | .                  | .                  | . | Gorai.004G276800.1 | . |
| .                  | .                  | .                  | .                  | . | .                  | . |
| Vv04g0518          | .                  | .                  | .                  | . | Gorai.             | . |
| 011G080400.1       | .                  | .                  | .                  | . | .                  | . |
| .                  | Vv11g0500          | Tc09_g010790       | .                  | . | .                  | . |
| .                  | Gorai.010G065700.1 | .                  | .                  | . | .                  | . |
| Vv04g0519          | Tc01_g033410       | .                  | .                  | . | .                  | . |
| .                  | .                  | .                  | .                  | . | .                  | . |
| .                  | .                  | .                  | .                  | . | .                  | . |



|                    |                    |                    |                    |                    |   |
|--------------------|--------------------|--------------------|--------------------|--------------------|---|
| Vv04g0520          | .                  | .                  | .                  | Gorai.004G274400.1 | . |
| .                  | .                  | .                  | .                  | .                  | . |
| Vv04g0521          | Tc01_g028480       | .                  | .                  | .                  | . |
| .                  | .                  | .                  | .                  | .                  | . |
| Vv04g0522          | .                  | Gorai.013G201000.1 | .                  | .                  | . |
| .                  | .                  | .                  | .                  | .                  | . |
| Vv04g0523          | Tc01_g033120       | .                  | .                  | .                  | . |
| .                  | .                  | .                  | .                  | .                  | . |
| Vv04g0524          | .                  | .                  | .                  | Gorai.             | . |
| 011G080500.1       | Vv09g0580          | .                  | .                  | Gorai.010G227300.1 | . |
| Gorai.009G129600.1 | Gorai.011G080500.1 | .                  | .                  | .                  | . |
| .                  | .                  | .                  | .                  | .                  | . |
| Vv04g0525          | .                  | .                  | .                  | .                  | . |
| .                  | .                  | .                  | .                  | .                  | . |
| Vv04g0526          | .                  | Gorai.013G233000.1 | .                  | .                  | . |
| Gorai.011G080600.1 | Vv09g0581          | .                  | .                  | .                  | . |
| Gorai.010G227200.1 | Gorai.009G129700.1 | Gorai.011G080600.1 | .                  | .                  | . |
| .                  | Vv11g0506          | Tc09_g010830       | Gorai.013G233000.1 | .                  | . |
| .                  | Gorai.009G020100.1 | Gorai.010G065500.1 | .                  | .                  | . |
| Vv04g0527          | Tc09_g003770       | .                  | .                  | .                  | . |
| Vv09g0582          | .                  | .                  | .                  | .                  | . |
| .                  | .                  | .                  | .                  | .                  | . |
| Vv04g0528          | .                  | .                  | .                  | .                  | . |
| .                  | .                  | .                  | .                  | .                  | . |
| Vv04g0529          | .                  | .                  | .                  | .                  | . |
| .                  | .                  | .                  | .                  | .                  | . |
| Vv04g0530          | .                  | Gorai.013G233200.1 | .                  | .                  | . |
| .                  | Vv09g0593          | .                  | .                  | Gorai.010G227000.1 | . |
| Gorai.009G130100.1 | .                  | .                  | .                  | .                  | . |
| .                  | .                  | .                  | .                  | .                  | . |
| Vv04g0531          | Tc01_g039010       | Gorai.013G182100.1 | .                  | .                  | . |
| .                  | .                  | .                  | .                  | .                  | . |
| Vv04g0532          | Tc01_g039000       | Gorai.013G182300.1 | .                  | .                  | . |
| .                  | Vv09g0595          | .                  | .                  | .                  | . |
| .                  | .                  | .                  | .                  | .                  | . |
| Vv04g0533          | Tc01_g038970       | Gorai.013G182900.1 | .                  | .                  | . |
| .                  | .                  | .                  | .                  | .                  | . |
| Vv04g0534          | .                  | .                  | Gorai.004G274300.1 | .                  | . |
| Gorai.011G081400.1 | Vv09g0610          | .                  | .                  | .                  | . |
| Gorai.011G081400.1 | .                  | .                  | .                  | .                  | . |

|                    |                    |                    |                    |                    |   |
|--------------------|--------------------|--------------------|--------------------|--------------------|---|
| Vv04g0535          | .                  | .                  | .                  | Gorai.004G274200.1 | . |
| .                  | .                  | .                  | .                  | .                  | . |
| Vv04g0536          | .                  | .                  | .                  | Gorai.004G274100.1 | . |
| .                  | .                  | .                  | .                  | .                  | . |
| Vv04g0537          | .                  | .                  | .                  | .                  | . |
| .                  | .                  | .                  | .                  | .                  | . |
| Vv04g0538          | .                  | Gorai.013G195900.1 | .                  | .                  | . |
| .                  | .                  | .                  | .                  | .                  | . |
| Vv04g0539          | .                  | .                  | .                  | .                  | . |
| .                  | .                  | .                  | .                  | .                  | . |
| Vv04g0540          | .                  | .                  | .                  | .                  | . |
| .                  | .                  | .                  | .                  | .                  | . |
| Vv04g0541          | .                  | .                  | .                  | .                  | . |
| .                  | .                  | .                  | .                  | .                  | . |
| Vv04g0542          | .                  | Gorai.013G233800.1 | .                  | Gorai.             | . |
| 004G274000.1       | .                  | .                  | Vv09g0626          | .                  | . |
| .                  | .                  | .                  | Vv11g0531          | Tc09_g011130       | . |
| Gorai.013G233800.1 | .                  | .                  | Gorai.009G010100.1 | .                  | . |
| Gorai.010G064500.1 | .                  | .                  | .                  | .                  | . |
| Vv04g0543          | .                  | .                  | .                  | .                  | . |
| .                  | .                  | .                  | .                  | .                  | . |
| Vv04g0544          | Tc01_g029390       | .                  | Gorai.001G041500.1 | .                  | . |
| Gorai.004G271400.1 | .                  | .                  | .                  | .                  | . |
| .                  | .                  | .                  | .                  | .                  | . |
| Vv04g0545          | .                  | Gorai.013G215500.1 | .                  | .                  | . |
| .                  | Gorai.011G082000.1 | Vv09g0631          | .                  | .                  | . |
| .                  | Gorai.011G082000.1 | .                  | .                  | .                  | . |
| Vv04g0546          | .                  | Gorai.001G033000.1 | .                  | .                  | . |
| .                  | .                  | .                  | .                  | .                  | . |
| Vv04g0547          | .                  | .                  | .                  | .                  | . |
| .                  | .                  | .                  | .                  | .                  | . |
| Vv04g0548          | .                  | Gorai.013G215400.1 | .                  | .                  | . |
| .                  | .                  | .                  | .                  | .                  | . |
| .                  | Vv11g0540          | Tc09_g011240       | .                  | .                  | . |
| .                  | Gorai.010G064200.1 | .                  | .                  | .                  | . |
| Vv04g0549          | .                  | Gorai.013G215300.1 | .                  | .                  | . |
| Gorai.009G057400.1 | .                  | Gorai.010G114100.1 | .                  | .                  | . |

|                    |                    |                    |           |                    |
|--------------------|--------------------|--------------------|-----------|--------------------|
|                    |                    |                    | Vv11g0541 |                    |
| Tc09_g011250       | Gorai.013G215300.1 | .                  | .         | Gorai.             |
| 009G057400.1       | .                  | .                  | .         | .                  |
| Vv04g0550          | Tc09_g003530       | .                  | .         | .                  |
| .                  | .                  | .                  | .         | .                  |
| Vv04g0551          | Tc01_g007690       | .                  | .         | .                  |
| .                  | .                  | .                  | .         | .                  |
| Vv04g0552          | .                  | .                  | .         | .                  |
| .                  | .                  | .                  | .         | .                  |
| Vv04g0553          | .                  | .                  | .         | .                  |
| .                  | .                  | .                  | .         | .                  |
| Vv04g0554          | Gorai.013G215200.1 | .                  | .         | .                  |
| Gorai.009G057600.1 | Gorai.010G114300.1 | .                  | .         | .                  |
| .                  | .                  | .                  | .         | .                  |
| Vv04g0555          | Gorai.013G234000.1 | .                  | .         | .                  |
| Gorai.010G114400.1 | .                  | .                  | .         | .                  |
| .                  | Vv11g0554          | .                  | .         | .                  |
| .                  | Gorai.010G063900.1 | .                  | .         | .                  |
| Vv04g0556          | .                  | .                  | .         | .                  |
| Vv03g0651          | Gorai.005G239000.1 | .                  | .         | .                  |
| .                  | .                  | .                  | .         | .                  |
| Vv04g0557          | .                  | .                  | .         | .                  |
| .                  | .                  | .                  | .         | .                  |
| Vv04g0558          | .                  | .                  | .         | Gorai.             |
| 010G114500.1       | Vv03g0648          | .                  | .         | Gorai.005G239200.1 |
| .                  | .                  | .                  | .         | .                  |
| Vv04g0559          | .                  | .                  | .         | .                  |
| .                  | .                  | .                  | .         | .                  |
| Vv04g0560          | .                  | .                  | .         | .                  |
| Vv03g0646          | .                  | .                  | .         | .                  |
| .                  | .                  | .                  | .         | .                  |
| Vv04g0561          | .                  | .                  | .         | .                  |
| Vv03g0645          | Tc02_g008610       | .                  | .         | .                  |
| .                  | .                  | .                  | .         | .                  |
| Vv04g0562          | .                  | .                  | .         | .                  |
| Vv03g0644          | .                  | .                  | .         | .                  |
| .                  | .                  | .                  | .         | .                  |
| Vv04g0563          | .                  | .                  | .         | .                  |
| Vv03g0643          | Tc02_g008600       | Gorai.013G042500.1 | .         | .                  |
| Gorai.008G025200.1 | .                  | .                  | .         | .                  |
| .                  | .                  | .                  | .         | .                  |
| Vv04g0564          | .                  | .                  | .         | .                  |

|                    |                    |                    |                    |                    |                    |   |   |
|--------------------|--------------------|--------------------|--------------------|--------------------|--------------------|---|---|
| Vv03g0642          | .                  | .                  | .                  | .                  | .                  | . | . |
| .                  | .                  | .                  | .                  | .                  | .                  | . | . |
| Vv04g0565          | .                  | .                  | Gorai.001G042100.1 | .                  | .                  | . | . |
|                    | Gorai.011G082600.1 | .                  | Vv09g0648          | Tc06_g001600       | .                  | . | . |
| .                  | Gorai.009G130800.1 | .                  | Gorai.011G082600.1 | .                  | .                  | . | . |
| .                  | Vv11g0558          | Tc09_g011370       | .                  | Gorai.001G042100.1 | .                  | . | . |
| .                  | Gorai.009G017600.1 | .                  | .                  | .                  | .                  | . | . |
| Vv04g0566          | .                  | .                  | .                  | .                  | .                  | . | . |
| .                  | .                  | .                  | .                  | .                  | .                  | . | . |
| .                  | .                  | .                  | .                  | .                  | .                  | . | . |
| Vv04g0567          | .                  | .                  | .                  | .                  | Gorai.009G057700.1 | . | . |
| .                  | .                  | .                  | .                  | .                  | .                  | . | . |
| .                  | .                  | .                  | .                  | .                  | .                  | . | . |
| Vv04g0568          | Tc01_g038640       | .                  | .                  | .                  | .                  | . | . |
| .                  | .                  | .                  | .                  | .                  | .                  | . | . |
| .                  | .                  | .                  | .                  | .                  | .                  | . | . |
| Vv04g0569          | .                  | .                  | Gorai.001G042400.1 | .                  | .                  | . | . |
| Gorai.009G057800.1 | .                  | Gorai.011G083000.1 | Vv09g0652          | .                  | .                  | . | . |
| Tc06_g001640       | .                  | Gorai.010G225600.1 | .                  | Gorai.             | .                  | . | . |
| 011G083000.1       | .                  | Vv11g0567          | Tc09_g011400       | .                  | .                  | . | . |
| Gorai.001G033300.1 | .                  | Gorai.009G057800.1 | .                  | .                  | .                  | . | . |
| Vv04g0570          | .                  | .                  | .                  | .                  | .                  | . | . |
| .                  | .                  | .                  | .                  | .                  | .                  | . | . |
| .                  | .                  | .                  | .                  | .                  | .                  | . | . |
| Vv04g0571          | .                  | .                  | .                  | .                  | Gorai.009G057900.1 | . | . |
|                    | Gorai.011G083400.1 | .                  | .                  | .                  | .                  | . | . |
| .                  | .                  | .                  | .                  | .                  | .                  | . | . |
| .                  | .                  | .                  | .                  | .                  | .                  | . | . |
| Vv04g0572          | Tc01_g038380       | Gorai.013G215000.1 | Gorai.             | .                  | .                  | . | . |
| 001G042600.1       | .                  | Gorai.009G058000.1 | Gorai.010G114900.1 | .                  | .                  | . | . |
| .                  | .                  | .                  | .                  | .                  | .                  | . | . |
| .                  | .                  | .                  | .                  | .                  | .                  | . | . |
| Vv04g0573          | .                  | Gorai.013G185900.1 | Gorai.001G033600.1 | .                  | .                  | . | . |
| .                  | Gorai.009G058200.1 | Gorai.010G115100.1 | .                  | .                  | .                  | . | . |
| .                  | .                  | .                  | Vv11g0576          | .                  | .                  | . | . |
| .                  | Gorai.013G214800.1 | Gorai.001G033600.1 | .                  | .                  | .                  | . | . |
| Gorai.009G058200.1 | .                  | .                  | .                  | .                  | .                  | . | . |
| Vv04g0574          | .                  | .                  | .                  | .                  | .                  | . | . |
| .                  | .                  | .                  | .                  | .                  | .                  | . | . |
| .                  | .                  | .                  | .                  | .                  | .                  | . | . |
| Vv04g0575          | Tc01_g007680       | .                  | .                  | .                  | .                  | . | . |
| .                  | .                  | .                  | .                  | .                  | .                  | . | . |
| .                  | .                  | .                  | .                  | .                  | .                  | . | . |
| Vv04g0576          | .                  | Gorai.001G033700.1 | .                  | .                  | .                  | . | . |
| .                  | .                  | .                  | .                  | .                  | .                  | . | . |
| .                  | .                  | .                  | .                  | .                  | .                  | . | . |
| Vv04g0577          | .                  | Gorai.013G234700.1 | Gorai.001G033800.1 | .                  | .                  | . | . |
| .                  | Gorai.009G058400.1 | Gorai.010G115300.1 | .                  | .                  | .                  | . | . |
| .                  | .                  | .                  | .                  | .                  | .                  | . | . |
| .                  | .                  | Gorai.001G033800.1 | .                  | Vv11g0583          | .                  | . | . |
| .                  | .                  | .                  | .                  | Gorai.             | .                  | . | . |

|              |                    |                    |                    |        |   |
|--------------|--------------------|--------------------|--------------------|--------|---|
| 009G058400.1 | .                  | .                  | .                  | .      | . |
| Vv04g0578    | Tc09_g027450       | Gorai.013G214700.1 | .                  | .      | . |
| .            | Gorai.010G115500.1 | .                  | .                  | .      | . |
| .            | .                  | .                  | .                  | .      | . |
| .            | .                  | .                  | .                  | .      | . |
| Vv04g0579    | Tc01_g017660       | .                  | Gorai.001G043600.1 | .      | . |
| .            | Gorai.009G058500.1 | .                  | .                  | .      | . |
| .            | .                  | .                  | .                  | .      | . |
| .            | .                  | .                  | .                  | .      | . |
| Vv04g0580    | Tc09_g003290       | .                  | .                  | .      | . |
| .            | .                  | .                  | .                  | .      | . |
| .            | .                  | .                  | .                  | .      | . |
| Vv04g0581    | .                  | .                  | .                  | .      | . |
| .            | .                  | .                  | .                  | .      | . |
| .            | .                  | .                  | .                  | .      | . |
| Vv04g0582    | Tc01_g007380       | .                  | Gorai.001G043900.1 | .      | . |
| .            | Gorai.009G058600.1 | .                  | .                  | .      | . |
| .            | .                  | .                  | .                  | .      | . |
| .            | .                  | .                  | .                  | .      | . |
| Vv04g0583    | .                  | Gorai.001G034200.1 | .                  | .      | . |
| .            | .                  | .                  | .                  | .      | . |
| .            | .                  | .                  | .                  | .      | . |
| .            | .                  | .                  | .                  | .      | . |
| Vv11g0608    | Tc09_g011820       | .                  | Gorai.001G034200.1 | .      | . |
| .            | Gorai.009G016000.1 | .                  | .                  | .      | . |
| .            | .                  | .                  | .                  | .      | . |
| Vv04g0584    | .                  | Gorai.001G034300.1 | .                  | .      | . |
| .            | Gorai.010G115600.1 | Vv09g0691          | .                  | .      | . |
| .            | Gorai.009G127600.1 | .                  | .                  | .      | . |
| .            | .                  | .                  | .                  | .      | . |
| Vv04g0585    | .                  | .                  | .                  | .      | . |
| .            | .                  | .                  | .                  | .      | . |
| .            | .                  | .                  | .                  | .      | . |
| Vv04g0586    | Tc01_g004580       | .                  | .                  | Gorai. | . |
| .            | .                  | .                  | .                  | .      | . |
| 009G058700.1 | .                  | .                  | .                  | .      | . |
| .            | .                  | .                  | .                  | .      | . |
| .            | .                  | .                  | .                  | .      | . |
| Vv04g0587    | .                  | Gorai.001G034500.1 | .                  | .      | . |
| .            | .                  | .                  | .                  | .      | . |
| .            | .                  | .                  | .                  | .      | . |
| .            | .                  | .                  | .                  | .      | . |
| Vv04g0588    | .                  | .                  | Gorai.009G058800.1 | .      | . |
| .            | Gorai.010G115800.1 | .                  | .                  | .      | . |
| .            | .                  | .                  | .                  | .      | . |
| .            | .                  | .                  | .                  | .      | . |
| Vv04g0589    | .                  | Gorai.001G034600.1 | .                  | .      | . |
| .            | Gorai.011G084800.1 | Vv09g0704          | Tc06_g003130       | .      | . |
| .            | .                  | Gorai.011G084800.1 | .                  | .      | . |
| .            | .                  | .                  | .                  | .      | . |
| .            | .                  | .                  | .                  | .      | . |
| Vv04g0590    | Tc01_g038070       | Gorai.013G214600.1 | Gorai.             | .      | . |
| .            | .                  | .                  | .                  | .      | . |
| 001G034700.1 | .                  | .                  | .                  | .      | . |
| .            | .                  | Vv11g0620          | Tc09_g011940       | .      | . |
| .            | .                  | Gorai.004G107700.1 | Gorai.004G275600.1 | Gorai. | . |
| .            | .                  | .                  | .                  | .      | . |
| 009G015500.1 | .                  | .                  | .                  | .      | . |
| Vv04g0591    | .                  | .                  | .                  | .      | . |

|                    |                    |                    |        |   |                    |   |   |
|--------------------|--------------------|--------------------|--------|---|--------------------|---|---|
| .                  | .                  | .                  | .      | . | .                  | . | . |
| .                  | .                  | .                  | .      | . | .                  | . | . |
| Vv04g0592          | Tc09_g003010       | Gorai.013G214400.1 | Gorai. |   |                    |   |   |
| 001G034800.1       | Gorai.009G058900.1 |                    |        |   |                    |   |   |
| .                  | .                  | .                  | .      | . | .                  | . | . |
| Tc09_g011950       | Gorai.001G034800.1 | Vv11g0621          | Gorai. |   |                    |   |   |
| 009G058900.1       | Gorai.010G061200.1 |                    |        |   |                    |   |   |
| Vv04g0593          | .                  | .                  | .      | . | .                  | . | . |
| 011G085000.1       | Vv09g0708          | Gorai.006G101600.1 | Gorai. |   |                    |   |   |
| Gorai.009G127000.1 | .                  | .                  | .      | . | .                  | . | . |
| .                  | .                  | .                  | .      | . | .                  | . | . |
| Vv04g0594          | .                  | .                  | .      | . | .                  | . | . |
| .                  | .                  | .                  | .      | . | .                  | . | . |
| .                  | .                  | .                  | .      | . | .                  | . | . |
| Vv04g0595          | .                  | .                  | .      | . | Gorai.009G059000.1 |   |   |
| .                  | .                  | .                  | .      | . | .                  | . | . |
| Vv11g0623          | Tc09_g012000       | .                  | .      | . | .                  | . | . |
| Gorai.009G059000.1 | Gorai.010G061000.1 | .                  | .      | . | .                  | . | . |
| Vv04g0596          | .                  | Gorai.001G034900.1 | .      | . | .                  | . | . |
| .                  | .                  | .                  | .      | . | .                  | . | . |
| .                  | .                  | .                  | .      | . | .                  | . | . |
| Vv04g0597          | .                  | .                  | .      | . | Gorai.009G059200.1 |   |   |
| .                  | Vv011rg0052        | .                  | .      | . | .                  | . | . |
| .                  | .                  | .                  | .      | . | .                  | . | . |
| Vv04g0598          | .                  | Gorai.013G235500.1 | .      | . | .                  | . | . |
| Gorai.009G059300.1 | .                  | Vv011rg0048        | .      | . | .                  | . | . |
| .                  | .                  | .                  | .      | . | .                  | . | . |
| .                  | .                  | .                  | .      | . | .                  | . | . |
| Vv04g0599          | .                  | .                  | .      | . | .                  | . | . |
| Vv011rg0040        | .                  | .                  | .      | . | .                  | . | . |
| .                  | .                  | .                  | .      | . | .                  | . | . |
| Vv04g0600          | .                  | Gorai.013G235900.1 | .      | . | .                  | . | . |
| Gorai.010G116100.1 | Vv011rg0038        | .                  | .      | . | .                  | . | . |
| .                  | .                  | .                  | .      | . | .                  | . | . |
| .                  | .                  | .                  | .      | . | .                  | . | . |
| Vv04g0601          | .                  | .                  | .      | . | .                  | . | . |
| Vv011rg0037        | .                  | .                  | .      | . | .                  | . | . |
| .                  | .                  | .                  | .      | . | .                  | . | . |
| Vv04g0602          | .                  | Gorai.013G214300.1 | .      | . | .                  | . | . |
| Gorai.009G059400.1 | .                  | .                  | .      | . | .                  | . | . |
| .                  | .                  | .                  | .      | . | .                  | . | . |
| .                  | .                  | .                  | .      | . | .                  | . | . |
| Vv04g0603          | Tc01_g017430       | Gorai.001G037800.1 | .      | . | .                  | . | . |
| Gorai.009G062400.1 | .                  | .                  | .      | . | .                  | . | . |
| .                  | .                  | .                  | .      | . | .                  | . | . |
| .                  | .                  | .                  | .      | . | .                  | . | . |
| Vv04g0604          | .                  | .                  | .      | . | .                  | . | . |
| .                  | .                  | .                  | .      | . | .                  | . | . |
| .                  | .                  | .                  | .      | . | .                  | . | . |
| Vv04g0605          | .                  | Gorai.001G037700.1 | .      | . | .                  | . | . |

|                    |                    |                    |                    |   |
|--------------------|--------------------|--------------------|--------------------|---|
| Gorai.009G062300.1 | Gorai.010G118300.1 | .                  | .                  | . |
| .                  | .                  | .                  | .                  | . |
| Vv04g0606          | Tc01_g004660       | .                  | .                  | . |
| .                  | .                  | .                  | .                  | . |
| Vv04g0607          | Tc01_g007270       | .                  | Gorai.001G037500.1 | . |
| .                  | .                  | .                  | .                  | . |
| Vv04g0608          | .                  | .                  | .                  | . |
| .                  | .                  | .                  | .                  | . |
| Vv04g0609          | .                  | Gorai.001G037200.1 | .                  | . |
| Gorai.009G061900.1 | .                  | .                  | .                  | . |
| .                  | Vv11g0635          | .                  | .                  | . |
| .                  | .                  | .                  | .                  | . |
| Vv04g0610          | .                  | .                  | .                  | . |
| .                  | .                  | .                  | .                  | . |
| Vv04g0611          | Tc01_g002260       | .                  | Gorai.001G031700.1 | . |
| Gorai.009G061700.1 | .                  | .                  | .                  | . |
| .                  | .                  | Vv11g0637          | .                  | . |
| .                  | .                  | .                  | .                  | . |
| Vv04g0612          | .                  | Gorai.001G037100.1 | .                  | . |
| Gorai.009G061600.1 | .                  | .                  | .                  | . |
| .                  | .                  | .                  | .                  | . |
| Vv04g0613          | .                  | .                  | Gorai.009G061400.1 | . |
| .                  | .                  | .                  | .                  | . |
| Vv04g0614          | .                  | .                  | .                  | . |
| .                  | .                  | .                  | .                  | . |
| Vv04g0615          | Tc01_g019550       | .                  | .                  | . |
| .                  | .                  | .                  | .                  | . |
| .                  | .                  | .                  | .                  | . |
| Vv04g0616          | .                  | .                  | .                  | . |
| .                  | .                  | .                  | .                  | . |
| Vv04g0617          | Tc09_g027670       | .                  | Gorai.001G031500.1 | . |
| Gorai.009G061200.1 | .                  | .                  | .                  | . |
| .                  | .                  | Vv11g0642          | .                  | . |
| Gorai.001G031500.1 | .                  | Gorai.009G061200.1 | .                  | . |
| Vv04g0618          | .                  | .                  | Gorai.             | . |
| 010G118200.1       | .                  | .                  | .                  | . |
| .                  | .                  | .                  | .                  | . |
| Vv04g0619          | Tc09_g029010       | .                  | Gorai.001G036900.1 | . |
| .                  | .                  | .                  | .                  | . |
| .                  | .                  | .                  | .                  | . |
| Vv04g0620          | .                  | .                  | .                  | . |

|                    |                    |   |   |                    |                    |        |   |
|--------------------|--------------------|---|---|--------------------|--------------------|--------|---|
| .                  | .                  | . | . | .                  | .                  | .      | . |
| .                  | .                  | . | . | .                  | .                  | .      | . |
| Vv04g0621          | Tc09_g013420       | . | . | .                  | .                  | Gorai. | . |
| 009G061100.1       | Gorai.011G088000.1 | . | . | .                  | .                  | .      | . |
| .                  | .                  | . | . | .                  | .                  | .      | . |
| .                  | .                  | . | . | .                  | .                  | .      | . |
| Vv04g0622          | Tc01_g019720       | . | . | Gorai.001G030600.1 | .                  | .      | . |
| Gorai.009G061000.1 | .                  | . | . | .                  | .                  | .      | . |
| .                  | .                  | . | . | .                  | .                  | .      | . |
| .                  | .                  | . | . | .                  | .                  | .      | . |
| Vv04g0623          | Tc01_g037970       | . | . | .                  | .                  | .      | . |
| .                  | .                  | . | . | .                  | .                  | .      | . |
| .                  | .                  | . | . | .                  | .                  | .      | . |
| Vv04g0624          | .                  | . | . | .                  | .                  | .      | . |
| .                  | .                  | . | . | .                  | .                  | .      | . |
| .                  | .                  | . | . | .                  | .                  | .      | . |
| Vv04g0625          | .                  | . | . | .                  | .                  | .      | . |
| .                  | .                  | . | . | .                  | .                  | .      | . |
| .                  | .                  | . | . | .                  | .                  | .      | . |
| Vv04g0626          | .                  | . | . | .                  | Gorai.009G060800.1 | .      | . |
| .                  | .                  | . | . | .                  | .                  | .      | . |
| .                  | .                  | . | . | .                  | .                  | .      | . |
| Vv04g0627          | .                  | . | . | .                  | .                  | .      | . |
| .                  | .                  | . | . | .                  | .                  | .      | . |
| .                  | .                  | . | . | .                  | .                  | .      | . |
| Vv04g0628          | Tc09_g013830       | . | . | .                  | .                  | .      | . |
| Gorai.010G117900.1 | .                  | . | . | .                  | .                  | .      | . |
| .                  | .                  | . | . | .                  | .                  | .      | . |
| Vv04g0629          | Tc09_g028790       | . | . | Gorai.001G036600.1 | .                  | .      | . |
| Gorai.009G060700.1 | Gorai.010G117700.1 | . | . | .                  | .                  | .      | . |
| .                  | .                  | . | . | .                  | .                  | .      | . |
| .                  | .                  | . | . | .                  | .                  | .      | . |
| Vv04g0630          | .                  | . | . | .                  | .                  | .      | . |
| Vv011rg0028        | .                  | . | . | .                  | .                  | .      | . |
| .                  | .                  | . | . | .                  | .                  | .      | . |
| Vv04g0631          | .                  | . | . | .                  | .                  | .      | . |
| .                  | .                  | . | . | .                  | .                  | .      | . |
| .                  | .                  | . | . | .                  | .                  | .      | . |
| Vv04g0632          | .                  | . | . | .                  | .                  | .      | . |
| .                  | .                  | . | . | .                  | .                  | .      | . |
| .                  | .                  | . | . | .                  | .                  | .      | . |
| Vv04g0633          | Tc01_g004930       | . | . | Gorai.001G036500.1 | .                  | .      | . |
| Gorai.009G060600.1 | Gorai.010G117500.1 | . | . | .                  | .                  | .      | . |
| .                  | .                  | . | . | .                  | .                  | .      | . |
| .                  | .                  | . | . | .                  | .                  | .      | . |
| Vv04g0634          | .                  | . | . | .                  | .                  | .      | . |
| .                  | .                  | . | . | .                  | .                  | .      | . |
| .                  | .                  | . | . | .                  | .                  | .      | . |
| Vv04g0635          | .                  | . | . | .                  | .                  | .      | . |
| .                  | .                  | . | . | .                  | .                  | .      | . |



|                    |                    |                    |                    |                    |        |   |   |
|--------------------|--------------------|--------------------|--------------------|--------------------|--------|---|---|
| Vv04g0636          | .                  | .                  | .                  | .                  | .      | . | . |
| .                  | .                  | .                  | .                  | .                  | .      | . | . |
| Vv04g0637          | .                  | .                  | .                  | .                  | .      | . | . |
| .                  | .                  | .                  | .                  | .                  | .      | . | . |
| Vv04g0638          | .                  | .                  | .                  | .                  | .      | . | . |
| .                  | .                  | .                  | .                  | .                  | .      | . | . |
| Vv04g0639          | .                  | .                  | .                  | Gorai.001G028000.1 | .      | . | . |
| Gorai.009G060500.1 | .                  | Gorai.010G117400.1 | .                  | .                  | .      | . | . |
| .                  | .                  | .                  | .                  | .                  | .      | . | . |
| Vv04g0640          | Tc01_g005240       | .                  | .                  | .                  | .      | . | . |
| .                  | .                  | .                  | .                  | .                  | .      | . | . |
| Vv04g0641          | .                  | .                  | Gorai.001G025000.1 | .                  | .      | . | . |
| .                  | .                  | .                  | .                  | .                  | .      | . | . |
| Vv04g0642          | .                  | .                  | Gorai.001G036000.1 | .                  | .      | . | . |
| .                  | .                  | .                  | .                  | .                  | .      | . | . |
| Vv04g0643          | .                  | .                  | Gorai.001G035900.1 | .                  | .      | . | . |
| Gorai.010G117200.1 | .                  | .                  | .                  | .                  | .      | . | . |
| .                  | .                  | .                  | .                  | .                  | .      | . | . |
| Vv04g0644          | Tc01_g002530       | .                  | .                  | .                  | .      | . | . |
| .                  | .                  | .                  | .                  | .                  | .      | . | . |
| Vv04g0645          | .                  | Gorai.013G213900.1 | Gorai.001G035700.1 | .                  | .      | . | . |
| .                  | Gorai.009G060200.1 | Gorai.010G117100.1 | .                  | .                  | .      | . | . |
| .                  | .                  | .                  | .                  | .                  | .      | . | . |
| Vv04g0646          | .                  | .                  | .                  | .                  | Gorai. | . | . |
| 010G116900.1       | .                  | .                  | .                  | .                  | .      | . | . |
| Vv04g0647          | .                  | .                  | Gorai.001G035500.1 | .                  | .      | . | . |
| .                  | .                  | .                  | .                  | .                  | .      | . | . |
| Vv04g0648          | Tc01_g005320       | .                  | Gorai.001G035300.1 | .                  | .      | . | . |
| .                  | .                  | .                  | .                  | .                  | .      | . | . |
| Vv04g0649          | .                  | .                  | .                  | .                  | .      | . | . |
| .                  | .                  | .                  | .                  | .                  | .      | . | . |
| Vv04g0650          | .                  | .                  | .                  | .                  | .      | . | . |
| .                  | .                  | .                  | .                  | .                  | .      | . | . |
| Vv04g0651          | .                  | .                  | .                  | .                  | .      | . | . |

|                    |              |                    |   |   |                    |        |   |
|--------------------|--------------|--------------------|---|---|--------------------|--------|---|
| .                  | .            | .                  | . | . | .                  | .      | . |
| .                  | .            | .                  | . | . | .                  | .      | . |
| Vv04g0652          | .            | Gorai.013G237400.1 | . | . | .                  | .      | . |
| .                  | .            | .                  | . | . | .                  | .      | . |
| .                  | .            | .                  | . | . | .                  | .      | . |
| Vv04g0653          | .            | Gorai.013G237300.1 | . | . | .                  | .      | . |
| .                  | .            | .                  | . | . | .                  | .      | . |
| .                  | .            | .                  | . | . | .                  | .      | . |
| Vv04g0654          | .            | .                  | . | . | Gorai.009G060000.1 | .      | . |
| .                  | .            | .                  | . | . | .                  | .      | . |
| .                  | .            | .                  | . | . | .                  | .      | . |
| Vv04g0655          | .            | .                  | . | . | .                  | .      | . |
| .                  | .            | .                  | . | . | .                  | .      | . |
| .                  | .            | .                  | . | . | .                  | .      | . |
| Vv04g0656          | .            | .                  | . | . | .                  | .      | . |
| .                  | .            | .                  | . | . | .                  | .      | . |
| .                  | .            | .                  | . | . | .                  | .      | . |
| Vv04g0657          | .            | .                  | . | . | .                  | .      | . |
| .                  | .            | .                  | . | . | .                  | .      | . |
| .                  | .            | .                  | . | . | .                  | .      | . |
| Vv04g0658          | .            | .                  | . | . | .                  | .      | . |
| .                  | .            | .                  | . | . | .                  | .      | . |
| .                  | .            | .                  | . | . | .                  | .      | . |
| Vv04g0659          | .            | .                  | . | . | .                  | Gorai. | . |
| 010G116800.1       | .            | .                  | . | . | .                  | .      | . |
| .                  | .            | .                  | . | . | .                  | .      | . |
| Vv04g0660          | .            | .                  | . | . | .                  | .      | . |
| .                  | .            | .                  | . | . | .                  | .      | . |
| .                  | .            | .                  | . | . | .                  | .      | . |
| Vv04g0661          | Tc01_g010390 | .                  | . | . | .                  | .      | . |
| .                  | .            | .                  | . | . | .                  | .      | . |
| .                  | .            | .                  | . | . | .                  | .      | . |
| Vv04g0662          | .            | .                  | . | . | .                  | .      | . |
| .                  | .            | .                  | . | . | .                  | .      | . |
| .                  | .            | .                  | . | . | .                  | .      | . |
| Vv04g0663          | .            | .                  | . | . | .                  | .      | . |
| .                  | .            | .                  | . | . | .                  | .      | . |
| .                  | .            | .                  | . | . | .                  | .      | . |
| Vv04g0664          | .            | .                  | . | . | .                  | .      | . |
| .                  | .            | .                  | . | . | .                  | .      | . |
| .                  | .            | .                  | . | . | .                  | .      | . |
| Vv04g0665          | .            | Gorai.013G236600.1 | . | . | .                  | .      | . |
| Gorai.009G059900.1 | .            | Vv011rg0002        | . | . | .                  | .      | . |
| .                  | .            | .                  | . | . | .                  | .      | . |
| .                  | .            | .                  | . | . | .                  | .      | . |
| Vv04g0666          | .            | .                  | . | . | .                  | .      | . |
| .                  | .            | .                  | . | . | .                  | .      | . |
| .                  | .            | .                  | . | . | .                  | .      | . |
| Vv04g0667          | .            | .                  | . | . | Gorai.009G059800.1 | .      | . |
| Gorai.010G116600.1 | .            | .                  | . | . | .                  | .      | . |

|                    |   |   |   |                    |   |                    |   |
|--------------------|---|---|---|--------------------|---|--------------------|---|
| .                  | . | . | . | .                  | . | .                  | . |
| .                  | . | . | . | .                  | . | .                  | . |
| Vv04g0668          | . | . | . | .                  | . | .                  | . |
| .                  | . | . | . | .                  | . | .                  | . |
| Vv04g0669          | . | . | . | .                  | . | Gorai.009G059700.1 | . |
| Gorai.010G116500.1 | . | . | . | .                  | . | .                  | . |
| .                  | . | . | . | .                  | . | .                  | . |
| .                  | . | . | . | .                  | . | .                  | . |
| Vv04g0670          | . | . | . | .                  | . | .                  | . |
| .                  | . | . | . | .                  | . | .                  | . |
| Vv04g0671          | . | . | . | .                  | . | .                  | . |
| .                  | . | . | . | .                  | . | .                  | . |
| Vv04g0672          | . | . | . | .                  | . | .                  | . |
| .                  | . | . | . | .                  | . | .                  | . |
| Vv04g0673          | . | . | . | .                  | . | .                  | . |
| .                  | . | . | . | .                  | . | .                  | . |
| Vv04g0674          | . | . | . | .                  | . | .                  | . |
| .                  | . | . | . | .                  | . | .                  | . |
| Vv04g0675          | . | . | . | .                  | . | .                  | . |
| .                  | . | . | . | .                  | . | .                  | . |
| Vv04g0676          | . | . | . | .                  | . | .                  | . |
| Vv09g0702          | . | . | . | .                  | . | .                  | . |
| .                  | . | . | . | .                  | . | .                  | . |
| Vv04g0677          | . | . | . | .                  | . | .                  | . |
| .                  | . | . | . | .                  | . | .                  | . |
| Vv04g0678          | . | . | . | .                  | . | .                  | . |
| .                  | . | . | . | .                  | . | .                  | . |
| Vv04g0679          | . | . | . | .                  | . | .                  | . |
| .                  | . | . | . | .                  | . | .                  | . |
| Vv04g0680          | . | . | . | .                  | . | Gorai.             | . |
| 010G116400.1       | . | . | . | .                  | . | .                  | . |
| .                  | . | . | . | .                  | . | .                  | . |
| Vv04g0681          | . | . | . | Gorai.001G035100.1 | . | .                  | . |
| Gorai.010G116300.1 | . | . | . | .                  | . | .                  | . |
| .                  | . | . | . | .                  | . | .                  | . |
| .                  | . | . | . | .                  | . | .                  | . |
| Vv04g0682          | . | . | . | Gorai.001G035000.1 | . | .                  | . |
| .                  | . | . | . | .                  | . | .                  | . |
| .                  | . | . | . | .                  | . | .                  | . |
| Vv04g0683          | . | . | . | .                  | . | Gorai.009G059500.1 | . |

|                    |                    |                    |                    |   |   |                    |   |
|--------------------|--------------------|--------------------|--------------------|---|---|--------------------|---|
| .                  | .                  | .                  | .                  | . | . | .                  | . |
| .                  | .                  | .                  | .                  | . | . | .                  | . |
| Vv04g0684          | Tc01_g022640       | Gorai.013G236000.1 | .                  | . | . | .                  | . |
| .                  | Gorai.010G116200.1 | .                  | .                  | . | . | .                  | . |
| .                  | .                  | .                  | .                  | . | . | .                  | . |
| .                  | .                  | .                  | .                  | . | . | .                  | . |
| Vv04g0685          | .                  | Gorai.013G233000.1 | .                  | . | . | .                  | . |
| .                  | .                  | .                  | .                  | . | . | .                  | . |
| .                  | .                  | .                  | .                  | . | . | .                  | . |
| Vv04g0686          | Tc01_g005630       | .                  | .                  | . | . | Gorai.             | . |
| 009G062500.1       | .                  | .                  | .                  | . | . | .                  | . |
| .                  | .                  | .                  | .                  | . | . | .                  | . |
| Vv04g0687          | .                  | .                  | .                  | . | . | .                  | . |
| .                  | .                  | .                  | .                  | . | . | .                  | . |
| .                  | .                  | .                  | .                  | . | . | .                  | . |
| Vv04g0688          | .                  | .                  | .                  | . | . | .                  | . |
| .                  | .                  | .                  | .                  | . | . | .                  | . |
| .                  | .                  | .                  | .                  | . | . | .                  | . |
| Vv04g0689          | .                  | .                  | .                  | . | . | .                  | . |
| .                  | .                  | .                  | .                  | . | . | .                  | . |
| .                  | .                  | .                  | .                  | . | . | .                  | . |
| Vv04g0690          | .                  | .                  | .                  | . | . | Gorai.009G062700.1 | . |
| Gorai.010G118700.1 | .                  | .                  | .                  | . | . | .                  | . |
| .                  | .                  | .                  | .                  | . | . | .                  | . |
| .                  | .                  | .                  | .                  | . | . | .                  | . |
| Vv04g0691          | .                  | .                  | Gorai.001G037900.1 | . | . | .                  | . |
| .                  | .                  | .                  | .                  | . | . | .                  | . |
| .                  | .                  | .                  | .                  | . | . | .                  | . |
| Vv04g0692          | .                  | .                  | .                  | . | . | .                  | . |
| .                  | .                  | .                  | .                  | . | . | .                  | . |
| .                  | .                  | .                  | .                  | . | . | .                  | . |
| Vv04g0693          | Tc01_g010220       | .                  | Gorai.001G032200.1 | . | . | .                  | . |
| .                  | .                  | .                  | .                  | . | . | .                  | . |
| .                  | .                  | .                  | .                  | . | . | .                  | . |
| Vv04g0694          | .                  | .                  | Gorai.001G029300.1 | . | . | .                  | . |
| Gorai.009G062800.1 | .                  | .                  | Vv09g0699          | . | . | .                  | . |
| .                  | .                  | .                  | .                  | . | . | .                  | . |
| .                  | .                  | .                  | .                  | . | . | .                  | . |
| Vv04g0695          | .                  | .                  | Gorai.001G038100.1 | . | . | .                  | . |
| Gorai.010G118800.1 | .                  | .                  | .                  | . | . | .                  | . |
| .                  | .                  | .                  | .                  | . | . | .                  | . |
| .                  | .                  | .                  | .                  | . | . | .                  | . |
| Vv04g0696          | Tc01_g022390       | .                  | Gorai.001G038200.1 | . | . | .                  | . |
| Gorai.009G062900.1 | .                  | Gorai.010G118900.1 | .                  | . | . | .                  | . |
| .                  | .                  | .                  | .                  | . | . | .                  | . |
| .                  | .                  | .                  | .                  | . | . | .                  | . |
| Vv04g0697          | .                  | .                  | .                  | . | . | Gorai.009G056900.1 | . |
| Gorai.010G113300.1 | .                  | .                  | .                  | . | . | .                  | . |
| .                  | .                  | .                  | .                  | . | . | .                  | . |
| .                  | .                  | .                  | .                  | . | . | .                  | . |
| .                  | .                  | .                  | .                  | . | . | .                  | . |

|                    |              |   |   |                    |                    |
|--------------------|--------------|---|---|--------------------|--------------------|
| Vv04g0698          | .            | . | . | .                  | Gorai.009G063100.1 |
| .                  | .            | . | . | .                  | .                  |
| .                  | .            | . | . | .                  | .                  |
| Vv04g0699          | .            | . | . | Gorai.001G038300.1 | .                  |
| Gorai.009G056400.1 | .            | . | . | Vv09g0670          | Tc06_g001740       |
| .                  | .            | . | . | .                  | .                  |
| .                  | .            | . | . | .                  | .                  |
| Vv04g0700          | .            | . | . | .                  | .                  |
| .                  | .            | . | . | .                  | .                  |
| .                  | .            | . | . | .                  | .                  |
| Vv04g0701          | .            | . | . | .                  | Gorai.009G063300.1 |
| .                  | .            | . | . | .                  | .                  |
| .                  | .            | . | . | .                  | .                  |
| Vv04g0702          | .            | . | . | .                  | .                  |
| .                  | .            | . | . | .                  | .                  |
| .                  | .            | . | . | .                  | .                  |
| Vv04g0703          | .            | . | . | .                  | .                  |
| .                  | .            | . | . | .                  | .                  |
| .                  | .            | . | . | .                  | .                  |
| Vv04g0704          | .            | . | . | .                  | .                  |
| .                  | .            | . | . | .                  | .                  |
| .                  | .            | . | . | .                  | .                  |
| Vv04g0705          | Tc01_g005950 | . | . | .                  | .                  |
| .                  | .            | . | . | .                  | .                  |
| .                  | .            | . | . | .                  | .                  |
| Vv04g0706          | .            | . | . | .                  | .                  |
| .                  | .            | . | . | .                  | .                  |
| .                  | .            | . | . | .                  | .                  |
| Vv04g0707          | .            | . | . | Gorai.001G038600.1 | .                  |
| .                  | .            | . | . | .                  | .                  |
| .                  | .            | . | . | .                  | .                  |
| Vv04g0708          | .            | . | . | .                  | Gorai.009G063700.1 |
| .                  | .            | . | . | .                  | .                  |
| .                  | .            | . | . | .                  | .                  |
| Vv04g0709          | .            | . | . | .                  | .                  |
| .                  | .            | . | . | .                  | .                  |
| .                  | .            | . | . | .                  | .                  |
| Vv04g0710          | .            | . | . | .                  | Gorai.             |
| 010G110300.1       | .            | . | . | .                  | .                  |
| .                  | .            | . | . | .                  | .                  |
| Vv04g0711          | Tc01_g001400 | . | . | .                  | .                  |
| .                  | .            | . | . | .                  | .                  |
| .                  | .            | . | . | .                  | .                  |
| Vv04g0712          | .            | . | . | .                  | Gorai.009G063800.1 |
| .                  | .            | . | . | .                  | .                  |
| .                  | .            | . | . | .                  | .                  |
| Vv04g0713          | .            | . | . | .                  | Gorai.009G063900.1 |
| .                  | .            | . | . | .                  | .                  |
| .                  | .            | . | . | .                  | .                  |
| Vv04g0714          | .            | . | . | Gorai.001G038700.1 | .                  |

|                    |              |   |                    |   |                    |        |   |
|--------------------|--------------|---|--------------------|---|--------------------|--------|---|
| Gorai.009G055700.1 | .            | . | .                  | . | .                  | .      | . |
| .                  | .            | . | .                  | . | .                  | .      | . |
| .                  | .            | . | .                  | . | .                  | .      | . |
| Vv04g0715          | .            | . | .                  | . | .                  | .      | . |
| .                  | .            | . | .                  | . | .                  | .      | . |
| .                  | .            | . | .                  | . | .                  | .      | . |
| Vv04g0716          | .            | . | .                  | . | .                  | .      | . |
| .                  | .            | . | .                  | . | .                  | .      | . |
| .                  | .            | . | .                  | . | .                  | .      | . |
| Vv04g0717          | .            | . | .                  | . | .                  | .      | . |
| .                  | .            | . | .                  | . | .                  | .      | . |
| .                  | .            | . | .                  | . | .                  | .      | . |
| Vv04g0718          | Tc01_g022330 | . | .                  | . | .                  | .      | . |
| .                  | .            | . | .                  | . | .                  | .      | . |
| .                  | .            | . | .                  | . | .                  | .      | . |
| Vv04g0719          | .            | . | .                  | . | .                  | .      | . |
| .                  | .            | . | .                  | . | .                  | .      | . |
| .                  | .            | . | .                  | . | .                  | .      | . |
| Vv04g0720          | .            | . | .                  | . | .                  | .      | . |
| .                  | .            | . | .                  | . | .                  | .      | . |
| .                  | .            | . | .                  | . | .                  | .      | . |
| Vv04g0721          | .            | . | .                  | . | .                  | Gorai. | . |
| 010G119600.1       | .            | . | .                  | . | .                  | .      | . |
| .                  | .            | . | .                  | . | .                  | .      | . |
| Vv04g0722          | .            | . | .                  | . | Gorai.009G064300.1 | .      | . |
| .                  | .            | . | .                  | . | .                  | .      | . |
| .                  | .            | . | .                  | . | .                  | .      | . |
| Vv04g0723          | .            | . | Gorai.001G038900.1 | . | .                  | .      | . |
| .                  | .            | . | .                  | . | .                  | .      | . |
| .                  | .            | . | .                  | . | .                  | .      | . |
| Vv04g0724          | .            | . | .                  | . | .                  | .      | . |
| .                  | .            | . | .                  | . | .                  | .      | . |
| .                  | .            | . | .                  | . | .                  | .      | . |
| Vv04g0725          | .            | . | .                  | . | .                  | .      | . |
| .                  | .            | . | .                  | . | .                  | .      | . |
| .                  | .            | . | .                  | . | .                  | .      | . |
| Vv04g0726          | .            | . | .                  | . | .                  | .      | . |
| .                  | .            | . | .                  | . | .                  | .      | . |
| .                  | .            | . | .                  | . | .                  | .      | . |
| Vv04g0727          | .            | . | .                  | . | .                  | .      | . |
| .                  | .            | . | .                  | . | .                  | .      | . |
| .                  | .            | . | .                  | . | .                  | .      | . |
| Vv04g0728          | .            | . | .                  | . | .                  | .      | . |
| .                  | .            | . | .                  | . | .                  | .      | . |
| .                  | .            | . | .                  | . | .                  | .      | . |
| Vv04g0729          | .            | . | .                  | . | .                  | .      | . |
| .                  | .            | . | .                  | . | .                  | .      | . |
| .                  | .            | . | .                  | . | .                  | .      | . |
| Vv04g0730          | Tc01_g001190 | . | .                  | . | .                  | .      | . |
| .                  | .            | . | .                  | . | .                  | .      | . |

|                    |              |   |   |                    |                    |   |
|--------------------|--------------|---|---|--------------------|--------------------|---|
| Vv04g0731          | Tc01_g010100 | . | . | .                  | .                  | . |
| .                  | .            | . | . | .                  | .                  | . |
| Vv04g0732          | .            | . | . | .                  | .                  | . |
| .                  | .            | . | . | .                  | .                  | . |
| Vv04g0733          | .            | . | . | .                  | .                  | . |
| .                  | .            | . | . | .                  | .                  | . |
| Vv04g0734          | .            | . | . | .                  | .                  | . |
| .                  | .            | . | . | .                  | .                  | . |
| Vv04g0735          | Tc01_g001170 | . | . | .                  | Gorai.             | . |
| 009G065000.1       | .            | . | . | .                  | .                  | . |
| .                  | .            | . | . | .                  | .                  | . |
| Vv04g0736          | .            | . | . | .                  | .                  | . |
| .                  | .            | . | . | .                  | .                  | . |
| Vv04g0737          | .            | . | . | .                  | .                  | . |
| .                  | .            | . | . | .                  | .                  | . |
| Vv04g0738          | .            | . | . | .                  | .                  | . |
| .                  | .            | . | . | .                  | .                  | . |
| Vv04g0739          | .            | . | . | .                  | .                  | . |
| .                  | .            | . | . | .                  | .                  | . |
| Vv04g0740          | Tc01_g001160 | . | . | .                  | .                  | . |
| .                  | .            | . | . | .                  | .                  | . |
| Vv04g0741          | Tc01_g006030 | . | . | .                  | .                  | . |
| .                  | .            | . | . | .                  | .                  | . |
| Vv04g0742          | .            | . | . | .                  | .                  | . |
| .                  | .            | . | . | .                  | .                  | . |
| Vv04g0743          | .            | . | . | .                  | Gorai.009G065100.1 | . |
| Gorai.010G120300.1 | .            | . | . | .                  | .                  | . |
| .                  | .            | . | . | .                  | .                  | . |
| Vv04g0744          | .            | . | . | .                  | .                  | . |
| .                  | .            | . | . | .                  | .                  | . |
| Vv04g0745          | .            | . | . | Gorai.001G039400.1 | .                  | . |
| Gorai.009G053100.1 | .            | . | . | .                  | .                  | . |
| .                  | .            | . | . | .                  | .                  | . |
| Vv04g0746          | .            | . | . | .                  | .                  | . |
| .                  | .            | . | . | .                  | .                  | . |

|                    |              |   |   |                    |   |                    |   |
|--------------------|--------------|---|---|--------------------|---|--------------------|---|
| Vv04g0747          | .            | . | . | .                  | . | .                  | . |
| .                  | .            | . | . | .                  | . | .                  | . |
| Vv04g0748          | .            | . | . | .                  | . | .                  | . |
| .                  | .            | . | . | .                  | . | .                  | . |
| Vv04g0749          | .            | . | . | .                  | . | .                  | . |
| .                  | .            | . | . | .                  | . | .                  | . |
| Vv04g0750          | .            | . | . | .                  | . | Gorai.009G050200.1 | . |
| Gorai.010G120400.1 | .            | . | . | .                  | . | .                  | . |
| .                  | .            | . | . | .                  | . | .                  | . |
| Vv04g0751          | Tc01_g006140 | . | . | .                  | . | .                  | . |
| .                  | .            | . | . | .                  | . | .                  | . |
| Vv04g0752          | .            | . | . | .                  | . | .                  | . |
| .                  | .            | . | . | .                  | . | .                  | . |
| Vv04g0753          | .            | . | . | Gorai.001G039500.1 | . | .                  | . |
| Gorai.009G065600.1 | .            | . | . | .                  | . | .                  | . |
| .                  | .            | . | . | .                  | . | .                  | . |
| Vv04g0754          | .            | . | . | .                  | . | .                  | . |
| .                  | .            | . | . | .                  | . | .                  | . |
| Vv04g0755          | .            | . | . | .                  | . | Gorai.009G065700.1 | . |
| .                  | .            | . | . | .                  | . | .                  | . |
| Vv04g0756          | .            | . | . | .                  | . | .                  | . |
| .                  | .            | . | . | .                  | . | .                  | . |
| Vv04g0757          | .            | . | . | .                  | . | .                  | . |
| .                  | .            | . | . | .                  | . | .                  | . |
| Vv04g0758          | .            | . | . | .                  | . | .                  | . |
| .                  | .            | . | . | .                  | . | .                  | . |
| Vv04g0759          | .            | . | . | .                  | . | Gorai.009G066100.1 | . |
| .                  | .            | . | . | .                  | . | .                  | . |
| Vv04g0760          | .            | . | . | .                  | . | .                  | . |
| .                  | .            | . | . | .                  | . | .                  | . |
| Vv04g0761          | .            | . | . | .                  | . | .                  | . |
| .                  | .            | . | . | .                  | . | .                  | . |
| Vv04g0762          | .            | . | . | .                  | . | .                  | . |
| .                  | .            | . | . | .                  | . | .                  | . |



|           |   |   |   |   |   |   |   |
|-----------|---|---|---|---|---|---|---|
| Vv04g0763 | . | . | . | . | . | . | . |
| .         | . | . | . | . | . | . | . |
| Vv04g0764 | . | . | . | . | . | . | . |
| .         | . | . | . | . | . | . | . |
| Vv04g0765 | . | . | . | . | . | . | . |
| .         | . | . | . | . | . | . | . |
| Vv04g0766 | . | . | . | . | . | . | . |
| .         | . | . | . | . | . | . | . |
| Vv04g0767 | . | . | . | . | . | . | . |
| .         | . | . | . | . | . | . | . |
| Vv04g0768 | . | . | . | . | . | . | . |
| .         | . | . | . | . | . | . | . |
| Vv04g0769 | . | . | . | . | . | . | . |
| .         | . | . | . | . | . | . | . |
| Vv04g0770 | . | . | . | . | . | . | . |
| .         | . | . | . | . | . | . | . |
| Vv04g0771 | . | . | . | . | . | . | . |
| .         | . | . | . | . | . | . | . |
| Vv04g0772 | . | . | . | . | . | . | . |
| .         | . | . | . | . | . | . | . |
| Vv04g0773 | . | . | . | . | . | . | . |
| .         | . | . | . | . | . | . | . |
| Vv04g0774 | . | . | . | . | . | . | . |
| .         | . | . | . | . | . | . | . |
| Vv04g0775 | . | . | . | . | . | . | . |
| .         | . | . | . | . | . | . | . |
| Vv04g0776 | . | . | . | . | . | . | . |
| .         | . | . | . | . | . | . | . |
| Vv04g0777 | . | . | . | . | . | . | . |
| .         | . | . | . | . | . | . | . |
| Vv04g0778 | . | . | . | . | . | . | . |
| .         | . | . | . | . | . | . | . |
| Vv04g0779 | . | . | . | . | . | . | . |

|           |              |   |   |   |   |   |   |
|-----------|--------------|---|---|---|---|---|---|
| .         | .            | . | . | . | . | . | . |
| Vv04g0780 | .            | . | . | . | . | . | . |
| .         | .            | . | . | . | . | . | . |
| Vv04g0781 | .            | . | . | . | . | . | . |
| .         | .            | . | . | . | . | . | . |
| Vv04g0782 | .            | . | . | . | . | . | . |
| .         | .            | . | . | . | . | . | . |
| Vv04g0783 | .            | . | . | . | . | . | . |
| .         | .            | . | . | . | . | . | . |
| Vv04g0784 | .            | . | . | . | . | . | . |
| .         | .            | . | . | . | . | . | . |
| Vv04g0785 | .            | . | . | . | . | . | . |
| .         | .            | . | . | . | . | . | . |
| Vv04g0786 | .            | . | . | . | . | . | . |
| .         | .            | . | . | . | . | . | . |
| Vv04g0787 | .            | . | . | . | . | . | . |
| .         | .            | . | . | . | . | . | . |
| Vv04g0788 | .            | . | . | . | . | . | . |
| .         | .            | . | . | . | . | . | . |
| Vv04g0789 | .            | . | . | . | . | . | . |
| .         | .            | . | . | . | . | . | . |
| Vv04g0790 | .            | . | . | . | . | . | . |
| .         | .            | . | . | . | . | . | . |
| Vv04g0791 | .            | . | . | . | . | . | . |
| .         | .            | . | . | . | . | . | . |
| Vv04g0792 | .            | . | . | . | . | . | . |
| .         | .            | . | . | . | . | . | . |
| Vv04g0793 | .            | . | . | . | . | . | . |
| .         | .            | . | . | . | . | . | . |
| Vv04g0794 | .            | . | . | . | . | . | . |
| .         | .            | . | . | . | . | . | . |
| Vv04g0795 | Tc01_g031820 | . | . | . | . | . | . |
| .         | .            | . | . | . | . | . | . |
| .         | .            | . | . | . | . | . | . |

|           |              |   |   |   |   |   |   |
|-----------|--------------|---|---|---|---|---|---|
| Vv04g0796 | .            | . | . | . | . | . | . |
| .         | .            | . | . | . | . | . | . |
| Vv04g0797 | .            | . | . | . | . | . | . |
| .         | .            | . | . | . | . | . | . |
| Vv04g0798 | .            | . | . | . | . | . | . |
| .         | .            | . | . | . | . | . | . |
| Vv04g0799 | .            | . | . | . | . | . | . |
| .         | .            | . | . | . | . | . | . |
| Vv04g0800 | Tc01_g014950 | . | . | . | . | . | . |
| .         | .            | . | . | . | . | . | . |
| Vv04g0801 | .            | . | . | . | . | . | . |
| .         | .            | . | . | . | . | . | . |
| Vv04g0802 | .            | . | . | . | . | . | . |
| .         | .            | . | . | . | . | . | . |
| Vv04g0803 | .            | . | . | . | . | . | . |
| .         | .            | . | . | . | . | . | . |
| Vv04g0804 | .            | . | . | . | . | . | . |
| .         | .            | . | . | . | . | . | . |
| Vv04g0805 | .            | . | . | . | . | . | . |
| .         | .            | . | . | . | . | . | . |
| Vv04g0806 | .            | . | . | . | . | . | . |
| .         | .            | . | . | . | . | . | . |
| Vv04g0807 | .            | . | . | . | . | . | . |
| .         | .            | . | . | . | . | . | . |
| Vv04g0808 | .            | . | . | . | . | . | . |
| .         | .            | . | . | . | . | . | . |
| Vv04g0809 | .            | . | . | . | . | . | . |
| .         | .            | . | . | . | . | . | . |
| Vv04g0810 | .            | . | . | . | . | . | . |
| .         | .            | . | . | . | . | . | . |
| Vv04g0811 | .            | . | . | . | . | . | . |
| .         | .            | . | . | . | . | . | . |
| Vv04g0812 | .            | . | . | . | . | . | . |
| .         | .            | . | . | . | . | . | . |

|           |                    |   |   |   |   |   |   |
|-----------|--------------------|---|---|---|---|---|---|
| Vv04g0813 | .                  | . | . | . | . | . | . |
| .         | .                  | . | . | . | . | . | . |
| Vv04g0814 | .                  | . | . | . | . | . | . |
| .         | .                  | . | . | . | . | . | . |
| Vv04g0815 | .                  | . | . | . | . | . | . |
| .         | .                  | . | . | . | . | . | . |
| Vv04g0816 | .                  | . | . | . | . | . | . |
| .         | .                  | . | . | . | . | . | . |
| Vv04g0817 | .                  | . | . | . | . | . | . |
| .         | .                  | . | . | . | . | . | . |
| Vv04g0818 | .                  | . | . | . | . | . | . |
| .         | .                  | . | . | . | . | . | . |
| Vv04g0819 | Tc01_g015070       | . | . | . | . | . | . |
| .         | .                  | . | . | . | . | . | . |
| Vv04g0820 | .                  | . | . | . | . | . | . |
| .         | .                  | . | . | . | . | . | . |
| Vv04g0821 | Tc01_g032090       | . | . | . | . | . | . |
| .         | .                  | . | . | . | . | . | . |
| Vv04g0822 | .                  | . | . | . | . | . | . |
| .         | .                  | . | . | . | . | . | . |
| Vv04g0823 | .                  | . | . | . | . | . | . |
| .         | .                  | . | . | . | . | . | . |
| Vv04g0824 | .                  | . | . | . | . | . | . |
| .         | .                  | . | . | . | . | . | . |
| Vv04g0825 | .                  | . | . | . | . | . | . |
| .         | .                  | . | . | . | . | . | . |
| Vv04g0826 | .                  | . | . | . | . | . | . |
| .         | .                  | . | . | . | . | . | . |
| Vv04g0827 | .                  | . | . | . | . | . | . |
| .         | .                  | . | . | . | . | . | . |
| Vv04g0828 | .                  | . | . | . | . | . | . |
| .         | .                  | . | . | . | . | . | . |
| Vv04g0829 | Gorai.013G188500.1 | . | . | . | . | . | . |

|              |              |                    |                    |        |
|--------------|--------------|--------------------|--------------------|--------|
| Vv04g0830    |              | Gorai.013G188600.1 |                    |        |
| Vv04g0831    |              |                    |                    |        |
| Vv04g0832    |              |                    |                    |        |
| Vv04g0833    |              |                    |                    |        |
| Vv04g0834    |              |                    |                    |        |
| Vv04g0835    |              |                    |                    |        |
| Vv04g0836    |              |                    |                    |        |
| Vv04g0837    |              | Gorai.013G188800.1 |                    | Gorai. |
| 004G288100.1 |              |                    |                    |        |
| Vv04g0838    |              |                    |                    |        |
| Vv04g0839    |              |                    |                    |        |
| Vv04g0840    |              |                    |                    |        |
| Vv04g0841    | Tc01_g004930 |                    |                    | Gorai. |
| 003G023200.1 |              |                    |                    |        |
| Vv04g0842    | Tc01_g021650 |                    |                    |        |
| Vv04g0843    |              |                    |                    |        |
| Vv04g0844    |              |                    |                    |        |
| Vv04g0845    |              |                    | Gorai.004G288000.1 |        |

|           |              |   |   |   |                    |   |   |
|-----------|--------------|---|---|---|--------------------|---|---|
| Vv04g0846 | .            | . | . | . | .                  | . | . |
| .         | .            | . | . | . | .                  | . | . |
| Vv04g0847 | .            | . | . | . | Gorai.004G287900.1 | . | . |
| .         | .            | . | . | . | .                  | . | . |
| Vv04g0848 | Tc01_g010970 | . | . | . | Gorai.004G287700.1 | . | . |
| .         | .            | . | . | . | .                  | . | . |
| Vv04g0849 | .            | . | . | . | .                  | . | . |
| .         | .            | . | . | . | .                  | . | . |
| Vv04g0850 | .            | . | . | . | .                  | . | . |
| .         | .            | . | . | . | .                  | . | . |
| Vv04g0851 | Tc01_g032420 | . | . | . | .                  | . | . |
| .         | .            | . | . | . | .                  | . | . |
| Vv04g0852 | Tc01_g032430 | . | . | . | .                  | . | . |
| .         | .            | . | . | . | .                  | . | . |
| Vv04g0853 | .            | . | . | . | .                  | . | . |
| .         | .            | . | . | . | .                  | . | . |
| Vv04g0854 | .            | . | . | . | .                  | . | . |
| .         | .            | . | . | . | .                  | . | . |
| Vv04g0855 | .            | . | . | . | .                  | . | . |
| .         | .            | . | . | . | .                  | . | . |
| Vv04g0856 | .            | . | . | . | .                  | . | . |
| .         | .            | . | . | . | .                  | . | . |
| Vv04g0857 | .            | . | . | . | .                  | . | . |
| .         | .            | . | . | . | .                  | . | . |
| Vv04g0858 | .            | . | . | . | .                  | . | . |
| .         | .            | . | . | . | .                  | . | . |
| Vv04g0859 | .            | . | . | . | .                  | . | . |
| .         | .            | . | . | . | .                  | . | . |
| Vv04g0860 | .            | . | . | . | .                  | . | . |
| .         | .            | . | . | . | .                  | . | . |
| Vv04g0861 | .            | . | . | . | Gorai.004G285200.1 | . | . |
| .         | .            | . | . | . | .                  | . | . |
| Vv04g0862 | Tc01_g021130 | . | . | . | .                  | . | . |

|           |   |                    |   |   |   |   |   |
|-----------|---|--------------------|---|---|---|---|---|
| .         | . | .                  | . | . | . | . | . |
| Vv04g0863 | . | .                  | . | . | . | . | . |
| .         | . | .                  | . | . | . | . | . |
| Vv04g0864 | . | .                  | . | . | . | . | . |
| .         | . | .                  | . | . | . | . | . |
| Vv04g0865 | . | .                  | . | . | . | . | . |
| .         | . | .                  | . | . | . | . | . |
| Vv04g0866 | . | .                  | . | . | . | . | . |
| .         | . | .                  | . | . | . | . | . |
| Vv04g0867 | . | .                  | . | . | . | . | . |
| .         | . | .                  | . | . | . | . | . |
| Vv04g0868 | . | .                  | . | . | . | . | . |
| .         | . | .                  | . | . | . | . | . |
| Vv04g0869 | . | .                  | . | . | . | . | . |
| .         | . | .                  | . | . | . | . | . |
| Vv04g0870 | . | .                  | . | . | . | . | . |
| .         | . | .                  | . | . | . | . | . |
| Vv04g0871 | . | Gorai.013G189100.1 | . | . | . | . | . |
| .         | . | .                  | . | . | . | . | . |
| Vv04g0872 | . | .                  | . | . | . | . | . |
| .         | . | .                  | . | . | . | . | . |
| Vv04g0873 | . | .                  | . | . | . | . | . |
| .         | . | .                  | . | . | . | . | . |
| Vv04g0874 | . | .                  | . | . | . | . | . |
| .         | . | .                  | . | . | . | . | . |
| Vv04g0875 | . | .                  | . | . | . | . | . |
| .         | . | .                  | . | . | . | . | . |
| Vv04g0876 | . | .                  | . | . | . | . | . |
| .         | . | .                  | . | . | . | . | . |
| Vv04g0877 | . | Tc01_g004990       | . | . | . | . | . |
| .         | . | .                  | . | . | . | . | . |
| Vv04g0878 | . | .                  | . | . | . | . | . |
| .         | . | .                  | . | . | . | . | . |
| .         | . | .                  | . | . | . | . | . |

|           |                    |   |   |   |   |   |   |
|-----------|--------------------|---|---|---|---|---|---|
| Vv04g0879 | .                  | . | . | . | . | . | . |
| .         | .                  | . | . | . | . | . | . |
| Vv04g0880 | .                  | . | . | . | . | . | . |
| .         | .                  | . | . | . | . | . | . |
| Vv04g0881 | Tc01_g005560       | . | . | . | . | . | . |
| .         | .                  | . | . | . | . | . | . |
| Vv04g0882 | Gorai.013G191400.1 | . | . | . | . | . | . |
| .         | .                  | . | . | . | . | . | . |
| Vv04g0883 | .                  | . | . | . | . | . | . |
| .         | .                  | . | . | . | . | . | . |
| Vv04g0884 | .                  | . | . | . | . | . | . |
| .         | .                  | . | . | . | . | . | . |
| Vv04g0885 | .                  | . | . | . | . | . | . |
| .         | .                  | . | . | . | . | . | . |
| Vv04g0886 | .                  | . | . | . | . | . | . |
| .         | .                  | . | . | . | . | . | . |
| Vv04g0887 | Tc01_g011170       | . | . | . | . | . | . |
| .         | .                  | . | . | . | . | . | . |
| Vv04g0888 | .                  | . | . | . | . | . | . |
| .         | .                  | . | . | . | . | . | . |
| Vv04g0889 | .                  | . | . | . | . | . | . |
| .         | .                  | . | . | . | . | . | . |
| Vv04g0890 | .                  | . | . | . | . | . | . |
| .         | .                  | . | . | . | . | . | . |
| Vv04g0891 | .                  | . | . | . | . | . | . |
| .         | .                  | . | . | . | . | . | . |
| Vv04g0892 | .                  | . | . | . | . | . | . |
| .         | .                  | . | . | . | . | . | . |
| Vv04g0893 | .                  | . | . | . | . | . | . |
| .         | .                  | . | . | . | . | . | . |
| Vv04g0894 | .                  | . | . | . | . | . | . |
| .         | .                  | . | . | . | . | . | . |
| Vv04g0895 | .                  | . | . | . | . | . | . |
| .         | .                  | . | . | . | . | . | . |



|              |              |   |   |   |   |        |   |
|--------------|--------------|---|---|---|---|--------|---|
| Vv04g0896    | .            | . | . | . | . | .      | . |
| .            | .            | . | . | . | . | .      | . |
| Vv04g0897    | .            | . | . | . | . | .      | . |
| .            | .            | . | . | . | . | .      | . |
| Vv04g0898    | .            | . | . | . | . | .      | . |
| .            | .            | . | . | . | . | .      | . |
| Vv04g0899    | .            | . | . | . | . | .      | . |
| .            | .            | . | . | . | . | .      | . |
| Vv04g0900    | .            | . | . | . | . | .      | . |
| .            | .            | . | . | . | . | .      | . |
| Vv04g0901    | .            | . | . | . | . | .      | . |
| .            | .            | . | . | . | . | .      | . |
| Vv04g0902    | Tc01_g022870 | . | . | . | . | Gorai. | . |
| 004G058300.1 | .            | . | . | . | . | .      | . |
| Vv04g0903    | .            | . | . | . | . | .      | . |
| .            | .            | . | . | . | . | .      | . |
| Vv04g0904    | .            | . | . | . | . | .      | . |
| .            | .            | . | . | . | . | .      | . |
| Vv04g0905    | .            | . | . | . | . | .      | . |
| .            | .            | . | . | . | . | .      | . |
| Vv04g0906    | Tc01_g005910 | . | . | . | . | .      | . |
| .            | .            | . | . | . | . | .      | . |
| Vv04g0907    | .            | . | . | . | . | .      | . |
| .            | .            | . | . | . | . | .      | . |
| Vv04g0908    | Tc01_g005930 | . | . | . | . | .      | . |
| .            | .            | . | . | . | . | .      | . |
| Vv04g0909    | Tc01_g011280 | . | . | . | . | .      | . |
| .            | .            | . | . | . | . | .      | . |
| Vv04g0910    | Tc01_g011310 | . | . | . | . | .      | . |
| .            | .            | . | . | . | . | .      | . |
| Vv04g0911    | .            | . | . | . | . | .      | . |
| .            | .            | . | . | . | . | .      | . |
| Vv04g0912    | .            | . | . | . | . | .      | . |

|           |   |                    |   |                    |   |   |   |
|-----------|---|--------------------|---|--------------------|---|---|---|
| .         | . | .                  | . | .                  | . | . | . |
| .         | . | .                  | . | .                  | . | . | . |
| Vv04g0913 | . | .                  | . | .                  | . | . | . |
| .         | . | .                  | . | .                  | . | . | . |
| Vv04g0914 | . | .                  | . | .                  | . | . | . |
| .         | . | .                  | . | .                  | . | . | . |
| Vv04g0915 | . | Gorai.013G180500.1 | . | .                  | . | . | . |
| .         | . | .                  | . | .                  | . | . | . |
| Vv04g0916 | . | .                  | . | .                  | . | . | . |
| .         | . | .                  | . | .                  | . | . | . |
| Vv04g0917 | . | .                  | . | .                  | . | . | . |
| .         | . | .                  | . | .                  | . | . | . |
| Vv04g0918 | . | .                  | . | .                  | . | . | . |
| .         | . | .                  | . | .                  | . | . | . |
| Vv04g0919 | . | .                  | . | .                  | . | . | . |
| .         | . | .                  | . | .                  | . | . | . |
| Vv04g0920 | . | .                  | . | .                  | . | . | . |
| .         | . | .                  | . | .                  | . | . | . |
| Vv04g0921 | . | .                  | . | .                  | . | . | . |
| .         | . | .                  | . | .                  | . | . | . |
| Vv04g0922 | . | .                  | . | .                  | . | . | . |
| .         | . | .                  | . | .                  | . | . | . |
| Vv04g0923 | . | .                  | . | Gorai.004G260400.1 | . | . | . |
| .         | . | .                  | . | .                  | . | . | . |
| Vv04g0924 | . | .                  | . | .                  | . | . | . |
| .         | . | .                  | . | .                  | . | . | . |
| Vv04g0925 | . | .                  | . | .                  | . | . | . |
| .         | . | .                  | . | .                  | . | . | . |
| Vv04g0926 | . | .                  | . | .                  | . | . | . |
| .         | . | .                  | . | .                  | . | . | . |
| Vv04g0927 | . | .                  | . | .                  | . | . | . |
| .         | . | .                  | . | .                  | . | . | . |
| Vv04g0928 | . | .                  | . | .                  | . | . | . |
| .         | . | .                  | . | .                  | . | . | . |
| .         | . | .                  | . | .                  | . | . | . |

|                    |              |                    |   |                    |   |   |   |
|--------------------|--------------|--------------------|---|--------------------|---|---|---|
| Vv04g0929          | .            | .                  | . | .                  | . | . | . |
| .                  | .            | .                  | . | .                  | . | . | . |
| Vv04g0930          | .            | .                  | . | .                  | . | . | . |
| .                  | .            | .                  | . | .                  | . | . | . |
| Vv04g0931          | .            | .                  | . | Gorai.004G260500.1 | . | . | . |
| .                  | .            | .                  | . | .                  | . | . | . |
| Vv04g0932          | Tc01_g010150 | .                  | . | Gorai.004G261400.1 | . | . | . |
| .                  | .            | .                  | . | .                  | . | . | . |
| Vv04g0933          | Tc01_g022970 | .                  | . | .                  | . | . | . |
| .                  | .            | .                  | . | .                  | . | . | . |
| Vv04g0934          | .            | Gorai.013G180000.1 | . | .                  | . | . | . |
| .                  | .            | .                  | . | .                  | . | . | . |
| Vv04g0935          | .            | .                  | . | .                  | . | . | . |
| .                  | .            | .                  | . | .                  | . | . | . |
| Vv04g0936          | .            | .                  | . | .                  | . | . | . |
| .                  | .            | .                  | . | .                  | . | . | . |
| Vv04g0937          | .            | .                  | . | .                  | . | . | . |
| .                  | .            | .                  | . | .                  | . | . | . |
| Vv04g0938          | .            | .                  | . | .                  | . | . | . |
| .                  | .            | .                  | . | .                  | . | . | . |
| Vv04g0939          | .            | .                  | . | .                  | . | . | . |
| .                  | .            | .                  | . | .                  | . | . | . |
| Vv04g0940          | .            | Gorai.013G179900.1 | . | .                  | . | . | . |
| .                  | .            | .                  | . | .                  | . | . | . |
| Vv04g0941          | .            | .                  | . | .                  | . | . | . |
| .                  | .            | .                  | . | .                  | . | . | . |
| Vv04g0942          | Tc01_g017770 | Gorai.013G179800.1 | . | .                  | . | . | . |
| Gorai.004G261700.1 | .            | .                  | . | .                  | . | . | . |
| .                  | .            | .                  | . | .                  | . | . | . |
| Vv04g0943          | .            | .                  | . | .                  | . | . | . |
| .                  | .            | .                  | . | .                  | . | . | . |
| Vv04g0944          | Tc01_g005950 | .                  | . | .                  | . | . | . |
| .                  | .            | .                  | . | .                  | . | . | . |
| Vv04g0945          | .            | .                  | . | .                  | . | . | . |

|           |              |  |                    |  |  |  |
|-----------|--------------|--|--------------------|--|--|--|
| Vv04g0946 |              |  |                    |  |  |  |
| Vv04g0947 |              |  |                    |  |  |  |
| Vv04g0948 | Tc01_g017720 |  | Gorai.013G179700.1 |  |  |  |
| Vv04g0949 |              |  |                    |  |  |  |
| Vv04g0950 |              |  |                    |  |  |  |
| Vv04g0951 | Tc01_g010220 |  | Gorai.013G179400.1 |  |  |  |
| Vv04g0952 |              |  |                    |  |  |  |
| Vv04g0953 |              |  |                    |  |  |  |
| Vv04g0954 |              |  |                    |  |  |  |
| Vv04g0955 |              |  |                    |  |  |  |
| Vv04g0956 |              |  |                    |  |  |  |
| Vv04g0957 |              |  |                    |  |  |  |
| Vv04g0958 |              |  |                    |  |  |  |
| Vv04g0959 |              |  |                    |  |  |  |
| Vv04g0960 |              |  |                    |  |  |  |
| Vv04g0961 |              |  |                    |  |  |  |

|           |              |   |   |                    |   |   |   |
|-----------|--------------|---|---|--------------------|---|---|---|
| Vv04g0962 | .            | . | . | .                  | . | . | . |
| .         | .            | . | . | .                  | . | . | . |
| Vv04g0963 | .            | . | . | .                  | . | . | . |
| .         | .            | . | . | .                  | . | . | . |
| Vv04g0964 | .            | . | . | .                  | . | . | . |
| .         | .            | . | . | .                  | . | . | . |
| Vv04g0965 | .            | . | . | .                  | . | . | . |
| .         | .            | . | . | .                  | . | . | . |
| Vv04g0966 | .            | . | . | .                  | . | . | . |
| .         | .            | . | . | .                  | . | . | . |
| Vv04g0967 | .            | . | . | .                  | . | . | . |
| .         | .            | . | . | .                  | . | . | . |
| Vv04g0968 | .            | . | . | .                  | . | . | . |
| .         | .            | . | . | .                  | . | . | . |
| Vv04g0969 | .            | . | . | .                  | . | . | . |
| .         | .            | . | . | .                  | . | . | . |
| Vv04g0970 | .            | . | . | .                  | . | . | . |
| .         | .            | . | . | .                  | . | . | . |
| Vv04g0971 | .            | . | . | .                  | . | . | . |
| .         | .            | . | . | .                  | . | . | . |
| Vv04g0972 | .            | . | . | Gorai.004G262800.1 | . | . | . |
| .         | .            | . | . | .                  | . | . | . |
| Vv04g0973 | .            | . | . | .                  | . | . | . |
| .         | .            | . | . | .                  | . | . | . |
| Vv04g0974 | Tc01_g010440 | . | . | .                  | . | . | . |
| .         | .            | . | . | .                  | . | . | . |
| Vv04g0975 | .            | . | . | .                  | . | . | . |
| .         | .            | . | . | .                  | . | . | . |
| Vv04g0976 | .            | . | . | .                  | . | . | . |
| .         | .            | . | . | .                  | . | . | . |
| Vv04g0977 | .            | . | . | .                  | . | . | . |
| .         | .            | . | . | .                  | . | . | . |
| Vv04g0978 | .            | . | . | Gorai.004G262900.1 | . | . | . |
| .         | .            | . | . | .                  | . | . | . |

|                    |              |   |   |                    |   |
|--------------------|--------------|---|---|--------------------|---|
| Vv04g0979          | .            | . | . | Gorai.004G263000.1 | . |
| .                  | .            | . | . | .                  | . |
| Vv04g0980          | Tc09_g034120 | . | . | Gorai.013G177100.1 | . |
| Gorai.004G263300.1 | .            | . | . | .                  | . |
| .                  | .            | . | . | .                  | . |
| Vv04g0981          | .            | . | . | .                  | . |
| .                  | .            | . | . | .                  | . |
| Vv04g0982          | Tc01_g040140 | . | . | .                  | . |
| .                  | .            | . | . | .                  | . |
| Vv04g0983          | .            | . | . | .                  | . |
| .                  | .            | . | . | .                  | . |
| Vv04g0984          | .            | . | . | .                  | . |
| .                  | .            | . | . | .                  | . |
| Vv04g0985          | .            | . | . | .                  | . |
| .                  | .            | . | . | .                  | . |
| Vv04g0986          | Tc09_g034000 | . | . | .                  | . |
| .                  | .            | . | . | .                  | . |
| Vv04g0987          | .            | . | . | .                  | . |
| .                  | .            | . | . | .                  | . |
| Vv04g0988          | .            | . | . | .                  | . |
| .                  | .            | . | . | .                  | . |
| Vv04g0989          | .            | . | . | .                  | . |
| .                  | .            | . | . | .                  | . |
| Vv04g0990          | .            | . | . | .                  | . |
| .                  | .            | . | . | .                  | . |
| Vv04g0991          | .            | . | . | Gorai.004G263500.1 | . |
| .                  | .            | . | . | .                  | . |
| Vv04g0992          | .            | . | . | Gorai.004G263600.1 | . |
| .                  | .            | . | . | .                  | . |
| Vv04g0993          | .            | . | . | .                  | . |
| .                  | .            | . | . | .                  | . |
| Vv04g0994          | .            | . | . | Gorai.004G263700.1 | . |
| .                  | .            | . | . | .                  | . |
| .                  | .            | . | . | .                  | . |

|           |              |   |   |   |   |   |   |
|-----------|--------------|---|---|---|---|---|---|
| Vv04g0995 | .            | . | . | . | . | . | . |
| .         | .            | . | . | . | . | . | . |
| Vv04g0996 | .            | . | . | . | . | . | . |
| .         | .            | . | . | . | . | . | . |
| Vv04g0997 | .            | . | . | . | . | . | . |
| .         | .            | . | . | . | . | . | . |
| Vv04g0998 | .            | . | . | . | . | . | . |
| .         | .            | . | . | . | . | . | . |
| Vv04g0999 | .            | . | . | . | . | . | . |
| .         | .            | . | . | . | . | . | . |
| Vv04g1000 | .            | . | . | . | . | . | . |
| .         | .            | . | . | . | . | . | . |
| Vv04g1001 | .            | . | . | . | . | . | . |
| .         | .            | . | . | . | . | . | . |
| Vv04g1002 | .            | . | . | . | . | . | . |
| .         | .            | . | . | . | . | . | . |
| Vv04g1003 | .            | . | . | . | . | . | . |
| .         | .            | . | . | . | . | . | . |
| Vv04g1004 | .            | . | . | . | . | . | . |
| .         | .            | . | . | . | . | . | . |
| Vv04g1005 | Tc01_g039970 | . | . | . | . | . | . |
| .         | .            | . | . | . | . | . | . |
| Vv04g1006 | .            | . | . | . | . | . | . |
| .         | .            | . | . | . | . | . | . |
| Vv04g1007 | .            | . | . | . | . | . | . |
| .         | .            | . | . | . | . | . | . |
| Vv04g1008 | .            | . | . | . | . | . | . |
| .         | .            | . | . | . | . | . | . |
| Vv04g1009 | .            | . | . | . | . | . | . |
| .         | .            | . | . | . | . | . | . |
| Vv04g1010 | .            | . | . | . | . | . | . |
| .         | .            | . | . | . | . | . | . |
| Vv04g1011 | .            | . | . | . | . | . | . |
| .         | .            | . | . | . | . | . | . |

|                    |                    |                    |                    |                    |   |           |   |
|--------------------|--------------------|--------------------|--------------------|--------------------|---|-----------|---|
| Vv04g1012          | .                  | .                  | .                  | .                  | . | .         | . |
| .                  | .                  | .                  | .                  | .                  | . | .         | . |
| Vv04g1013          | .                  | .                  | .                  | .                  | . | .         | . |
| .                  | .                  | .                  | .                  | .                  | . | .         | . |
| Vv04g1014          | .                  | .                  | .                  | Gorai.004G263900.1 | . | .         | . |
| .                  | .                  | .                  | .                  | .                  | . | .         | . |
| Vv04g1015          | .                  | .                  | .                  | .                  | . | .         | . |
| .                  | .                  | .                  | .                  | .                  | . | .         | . |
| Vv04g1016          | .                  | .                  | .                  | .                  | . | .         | . |
| .                  | .                  | .                  | .                  | .                  | . | .         | . |
| Vv04g1017          | .                  | .                  | .                  | .                  | . | .         | . |
| .                  | .                  | .                  | .                  | .                  | . | .         | . |
| Vv04g1018          | Tc01_g003910       | .                  | .                  | .                  | . | Gorai.    | . |
| 003G018400.1       | .                  | .                  | .                  | .                  | . | .         | . |
| Vv04g1019          | Tc01_g003900       | .                  | .                  | .                  | . | Gorai.    | . |
| 003G018300.1       | .                  | .                  | .                  | .                  | . | .         | . |
| Vv04g1020          | Tc01_g003890       | .                  | .                  | .                  | . | Gorai.    | . |
| 003G018200.1       | .                  | .                  | .                  | .                  | . | .         | . |
| Vv04g1021          | Tc01_g003880       | .                  | Gorai.008G070800.1 | .                  | . | .         | . |
| Gorai.007G207200.1 | Gorai.003G018100.1 | .                  | .                  | .                  | . | Vv18g1003 | . |
| .                  | .                  | .                  | .                  | .                  | . | .         | . |
| Vv04g1022          | Tc01_g003870       | .                  | .                  | .                  | . | .         | . |
| .                  | .                  | .                  | .                  | .                  | . | .         | . |
| Vv04g1023          | .                  | .                  | Gorai.008G070600.1 | .                  | . | .         | . |
| .                  | Vv18g1005          | Tc08_g001590       | Gorai.002G129900.1 | .                  | . | .         | . |
| .                  | Gorai.009G205600.1 | .                  | .                  | .                  | . | .         | . |
| Vv04g1024          | Tc01_g003860       | Gorai.007G051800.1 | Gorai.             | .                  | . | .         | . |
| 008G070500.1       | .                  | .                  | .                  | .                  | . | .         | . |
| .                  | .                  | .                  | .                  | .                  | . | .         | . |
| Vv04g1025          | .                  | .                  | .                  | .                  | . | .         | . |
| .                  | .                  | .                  | .                  | .                  | . | .         | . |
| Vv04g1026          | Tc01_g003850       | Gorai.007G051700.1 | Gorai.             | .                  | . | .         | . |
| 008G070400.1       | .                  | .                  | .                  | .                  | . | .         | . |
| .                  | .                  | .                  | .                  | .                  | . | .         | . |
| .                  | .                  | .                  | .                  | .                  | . | .         | . |



|                    |                    |                    |                    |   |   |   |   |
|--------------------|--------------------|--------------------|--------------------|---|---|---|---|
| Vv04g1027          | .                  | .                  | .                  | . | . | . | . |
| .                  | .                  | .                  | .                  | . | . | . | . |
| Vv04g1028          | Tc01_g003840       | .                  | Gorai.007G051600.1 | . | . | . | . |
| .                  | .                  | .                  | .                  | . | . | . | . |
| Vv04g1029          | .                  | .                  | .                  | . | . | . | . |
| .                  | .                  | .                  | .                  | . | . | . | . |
| Vv04g1030          | .                  | .                  | .                  | . | . | . | . |
| .                  | .                  | .                  | .                  | . | . | . | . |
| Vv04g1031          | .                  | .                  | .                  | . | . | . | . |
| .                  | .                  | .                  | .                  | . | . | . | . |
| Vv04g1032          | Tc01_g003830       | .                  | Gorai.008G070200.1 | . | . | . | . |
| Gorai.007G207100.1 | .                  | .                  | .                  | . | . | . | . |
| .                  | .                  | .                  | .                  | . | . | . | . |
| Vv04g1033          | .                  | .                  | .                  | . | . | . | . |
| .                  | .                  | .                  | .                  | . | . | . | . |
| Vv04g1034          | Tc01_g003820       | .                  | Gorai.008G070100.1 | . | . | . | . |
| Gorai.003G018000.1 | .                  | .                  | .                  | . | . | . | . |
| .                  | .                  | .                  | .                  | . | . | . | . |
| Vv04g1035          | Tc01_g003810       | .                  | Gorai.008G070000.1 | . | . | . | . |
| Gorai.007G207000.1 | Gorai.003G017900.1 | .                  | Vv18g1008          | . | . | . | . |
| Tc08_g001630       | Gorai.002G129800.1 | .                  | Gorai.005G106100.1 | . | . | . | . |
| Gorai.009G205300.1 | Gorai.009G274300.1 | .                  | Gorai.             | . | . | . | . |
| 010G012700.1       | .                  | .                  | .                  | . | . | . | . |
| Vv04g1036          | Tc01_g003800       | .                  | Gorai.008G069900.1 | . | . | . | . |
| Gorai.003G017800.1 | .                  | .                  | .                  | . | . | . | . |
| .                  | .                  | .                  | .                  | . | . | . | . |
| Vv04g1037          | Tc01_g003790       | .                  | Gorai.007G206900.1 | . | . | . | . |
| Gorai.003G017700.1 | .                  | Vv18g1014          | .                  | . | . | . | . |
| Tc08_g001650       | Gorai.005G106300.1 | .                  | .                  | . | . | . | . |
| Gorai.010G012400.1 | .                  | .                  | .                  | . | . | . | . |
| .                  | .                  | .                  | .                  | . | . | . | . |
| Vv04g1038          | Tc01_g003770       | .                  | Gorai.007G206800.1 | . | . | . | . |
| Gorai.003G017600.1 | .                  | Gorai.011G103100.1 | Vv18g1019          | . | . | . | . |
| Tc08_g001690       | .                  | Gorai.009G205000.1 | .                  | . | . | . | . |
| .                  | .                  | .                  | .                  | . | . | . | . |
| Vv04g1039          | Tc01_g003760       | .                  | Gorai.007G051500.1 | . | . | . | . |
| .                  | .                  | .                  | .                  | . | . | . | . |
| .                  | .                  | .                  | .                  | . | . | . | . |
| Vv04g1040          | .                  | .                  | .                  | . | . | . | . |
| Vv18g1020          | Tc08_g001700       | .                  | Gorai.005G106500.1 | . | . | . | . |
| Gorai.009G204900.1 | .                  | Gorai.010G012100.1 | .                  | . | . | . | . |

|                    |                    |                    |                    |   |
|--------------------|--------------------|--------------------|--------------------|---|
| Vv04g1041          | Tc01_g003750       | .                  | Gorai.008G069800.1 | . |
|                    | Gorai.003G016900.1 | .                  | .                  | . |
| .                  | .                  | .                  | .                  | . |
| Vv04g1042          | .                  | .                  | .                  | . |
| .                  | .                  | .                  | .                  | . |
| Vv04g1043          | Tc01_g003740       | Gorai.007G051300.1 | .                  | . |
| Gorai.007G206700.1 | .                  | Gorai.011G102800.1 | Vv18g1023          | . |
| .                  | .                  | .                  | .                  | . |
| Vv04g1044          | Tc01_g003730       | .                  | .                  | . |
| .                  | .                  | .                  | .                  | . |
| Vv04g1045          | .                  | .                  | .                  | . |
| .                  | .                  | .                  | .                  | . |
| Vv04g1046          | .                  | .                  | .                  | . |
| .                  | .                  | .                  | .                  | . |
| Vv04g1047          | .                  | .                  | .                  | . |
| Vv18g1025          | Tc08_g001730       | Gorai.005G107000.1 | .                  | . |
| Gorai.009G204600.1 | Gorai.009G274000.1 | .                  | .                  | . |
| .                  | .                  | .                  | .                  | . |
| Vv04g1048          | Tc01_g003710       | .                  | .                  | . |
| .                  | .                  | .                  | .                  | . |
| Vv04g1049          | .                  | Gorai.007G051200.1 | Gorai.008G069700.1 | . |
|                    | Gorai.007G206300.1 | .                  | .                  | . |
| .                  | .                  | .                  | .                  | . |
| Vv04g1050          | Tc01_g003640       | Gorai.008G069400.1 | .                  | . |
|                    | Gorai.003G016800.1 | .                  | .                  | . |
| .                  | .                  | .                  | .                  | . |
| Vv04g1051          | Tc01_g003620       | Gorai.008G069200.1 | .                  | . |
| .                  | Gorai.011G102600.1 | .                  | .                  | . |
| .                  | .                  | .                  | .                  | . |
| Vv04g1052          | .                  | .                  | .                  | . |
| .                  | .                  | .                  | .                  | . |
| Vv04g1053          | .                  | .                  | .                  | . |
| .                  | .                  | .                  | .                  | . |
| Vv04g1054          | .                  | .                  | .                  | . |
| .                  | .                  | .                  | .                  | . |
| Vv04g1055          | .                  | .                  | .                  | . |

|                    |                    |                    |              |                    |   |        |   |
|--------------------|--------------------|--------------------|--------------|--------------------|---|--------|---|
| .                  | .                  | .                  | .            | .                  | . | .      | . |
| .                  | .                  | .                  | .            | .                  | . | .      | . |
| Vv04g1056          | Tc01_g003610       | .                  | .            | Gorai.008G069000.1 | . | .      | . |
| Gorai.007G206100.1 | Gorai.003G016700.1 | .                  | .            | .                  | . | .      | . |
| .                  | .                  | .                  | .            | .                  | . | .      | . |
| .                  | .                  | .                  | .            | .                  | . | .      | . |
| Vv04g1057          | Tc01_g003600       | Gorai.007G051100.1 | .            | .                  | . | .      | . |
| Gorai.007G206000.1 | Gorai.003G016600.1 | .                  | .            | .                  | . | .      | . |
| .                  | .                  | .                  | .            | .                  | . | .      | . |
| .                  | .                  | .                  | .            | .                  | . | .      | . |
| Vv04g1058          | Tc01_g003590       | .                  | .            | Gorai.007G205800.1 | . | .      | . |
| .                  | .                  | .                  | .            | .                  | . | .      | . |
| .                  | .                  | .                  | .            | .                  | . | .      | . |
| Vv04g1059          | Tc01_g003580       | .                  | .            | Gorai.008G068900.1 | . | .      | . |
| Gorai.007G205700.1 | .                  | .                  | .            | Vv18g1040          | . | .      | . |
| .                  | .                  | .                  | .            | .                  | . | .      | . |
| .                  | .                  | .                  | .            | .                  | . | .      | . |
| Vv04g1060          | Tc01_g003570       | .                  | .            | .                  | . | .      | . |
| Gorai.011G102500.1 | .                  | .                  | .            | .                  | . | .      | . |
| .                  | .                  | .                  | .            | .                  | . | .      | . |
| Vv04g1061          | Tc01_g003560       | .                  | .            | .                  | . | Gorai. | . |
| 003G016500.1       | Gorai.011G102400.1 | .                  | .            | .                  | . | .      | . |
| .                  | .                  | .                  | .            | .                  | . | .      | . |
| .                  | .                  | .                  | .            | .                  | . | .      | . |
| Vv04g1062          | Tc01_g003550       | .                  | .            | Gorai.007G205600.1 | . | .      | . |
| .                  | .                  | .                  | .            | .                  | . | .      | . |
| .                  | .                  | .                  | .            | .                  | . | .      | . |
| Vv04g1063          | Tc01_g003540       | .                  | .            | .                  | . | Gorai. | . |
| 003G016400.1       | .                  | Vv18g1042          | Tc08_g001800 | Gorai.             | . | .      | . |
| 002G129300.1       | .                  | Gorai.009G204100.1 | .            | .                  | . | .      | . |
| .                  | .                  | .                  | .            | .                  | . | .      | . |
| Vv04g1064          | .                  | .                  | .            | .                  | . | .      | . |
| .                  | .                  | .                  | .            | .                  | . | .      | . |
| .                  | .                  | .                  | .            | .                  | . | .      | . |
| Vv04g1065          | .                  | .                  | .            | Gorai.007G205500.1 | . | .      | . |
| .                  | .                  | .                  | .            | .                  | . | .      | . |
| .                  | .                  | .                  | .            | .                  | . | .      | . |
| Vv04g1066          | .                  | .                  | .            | .                  | . | .      | . |
| .                  | .                  | .                  | .            | .                  | . | .      | . |
| .                  | .                  | .                  | .            | .                  | . | .      | . |
| Vv04g1067          | Tc01_g003520       | .                  | .            | Gorai.007G205300.1 | . | .      | . |
| Gorai.003G016200.1 | .                  | .                  | .            | Vv18g1053          | . | .      | . |
| .                  | Gorai.009G203800.1 | .                  | .            | Gorai.010G011200.1 | . | .      | . |
| .                  | .                  | .                  | .            | .                  | . | .      | . |
| Vv04g1068          | .                  | .                  | .            | .                  | . | .      | . |
| .                  | .                  | .                  | .            | .                  | . | .      | . |
| .                  | .                  | .                  | .            | .                  | . | .      | . |
| Vv04g1069          | .                  | .                  | .            | .                  | . | .      | . |
| .                  | .                  | .                  | .            | .                  | . | .      | . |
| .                  | .                  | .                  | .            | .                  | . | .      | . |

|                    |                    |   |                    |                    |        |   |   |
|--------------------|--------------------|---|--------------------|--------------------|--------|---|---|
| Vv04g1070          | .                  | . | .                  | .                  | .      | . | . |
| .                  | .                  | . | .                  | .                  | .      | . | . |
| Vv04g1071          | .                  | . | .                  | .                  | .      | . | . |
| .                  | .                  | . | .                  | .                  | .      | . | . |
| Vv04g1072          | Tc01_g003510       | . | .                  | Gorai.007G205200.1 | .      | . | . |
| .                  | .                  | . | .                  | .                  | .      | . | . |
| Vv04g1073          | Tc01_g003500       | . | .                  | Gorai.008G068800.1 | .      | . | . |
| .                  | .                  | . | .                  | .                  | .      | . | . |
| Vv04g1074          | Tc01_g003490       | . | .                  | Gorai.008G068700.1 | .      | . | . |
| .                  | .                  | . | .                  | .                  | .      | . | . |
| Vv04g1075          | Tc01_g003480       | . | .                  | .                  | .      | . | . |
| Gorai.011G102300.1 | .                  | . | .                  | .                  | .      | . | . |
| .                  | .                  | . | .                  | .                  | .      | . | . |
| Vv04g1076          | .                  | . | .                  | .                  | .      | . | . |
| .                  | .                  | . | .                  | .                  | .      | . | . |
| Vv04g1077          | Tc01_g003470       | . | .                  | Gorai.007G205100.1 | .      | . | . |
| Gorai.003G016100.1 | .                  | . | .                  | Vv18g1063          | .      | . | . |
| Tc08_g001910       | .                  | . | Gorai.009G203400.1 | Gorai.             | .      | . | . |
| 009G273600.1       | .                  | . | .                  | .                  | .      | . | . |
| .                  | .                  | . | .                  | .                  | .      | . | . |
| Vv04g1078          | .                  | . | .                  | .                  | .      | . | . |
| .                  | .                  | . | .                  | .                  | .      | . | . |
| Vv04g1079          | Tc01_g003460       | . | .                  | .                  | .      | . | . |
| .                  | .                  | . | .                  | .                  | .      | . | . |
| Vv04g1080          | Tc01_g003450       | . | .                  | Gorai.008G068600.1 | .      | . | . |
| .                  | Vv18g1064          | . | .                  | Tc08_g001920       | Gorai. | . | . |
| 002G128700.1       | Gorai.009G203300.1 | . | .                  | .                  | .      | . | . |
| .                  | .                  | . | .                  | .                  | .      | . | . |
| Vv04g1081          | Tc01_g003430       | . | .                  | Gorai.007G204600.1 | .      | . | . |
| Gorai.003G015900.1 | .                  | . | .                  | Vv18g1066          | .      | . | . |
| Tc08_g001930       | .                  | . | Gorai.009G203200.1 | .                  | .      | . | . |
| Gorai.010G010700.1 | .                  | . | .                  | .                  | .      | . | . |
| .                  | .                  | . | .                  | .                  | .      | . | . |
| Vv04g1082          | Tc01_g003420       | . | .                  | Gorai.007G204500.1 | .      | . | . |
| .                  | .                  | . | .                  | .                  | .      | . | . |
| Vv04g1083          | Tc01_g003410       | . | .                  | Gorai.007G204400.1 | .      | . | . |
| Gorai.003G015800.1 | .                  | . | .                  | .                  | .      | . | . |
| .                  | .                  | . | .                  | .                  | .      | . | . |
| Vv04g1084          | .                  | . | .                  | .                  | .      | . | . |
| .                  | .                  | . | .                  | .                  | .      | . | . |

|                    |              |                    |                    |   |
|--------------------|--------------|--------------------|--------------------|---|
| Vv04g1085          | Tc01_g003390 | .                  | Gorai.008G068500.1 | . |
| Gorai.007G204100.1 | .            | .                  | .                  | . |
| .                  | .            | .                  | .                  | . |
| Vv04g1086          | Tc01_g003370 | .                  | Gorai.007G204000.1 | . |
| Gorai.003G015600.1 | .            | .                  | .                  | . |
| .                  | .            | .                  | .                  | . |
| Vv04g1087          | Tc01_g003360 | .                  | .                  | . |
| Gorai.011G101900.1 | .            | .                  | .                  | . |
| .                  | .            | .                  | .                  | . |
| Vv04g1088          | Tc01_g003350 | Gorai.007G050900.1 | .                  | . |
| Gorai.007G203800.1 | .            | .                  | .                  | . |
| .                  | .            | .                  | .                  | . |
| Vv04g1089          | Tc01_g003340 | .                  | Gorai.008G068400.1 | . |
| .                  | .            | .                  | .                  | . |
| .                  | .            | .                  | .                  | . |
| Vv04g1090          | .            | .                  | .                  | . |
| .                  | .            | .                  | .                  | . |
| .                  | .            | .                  | .                  | . |
| Vv04g1091          | Tc01_g003310 | .                  | Gorai.007G203700.1 | . |
| .                  | .            | .                  | .                  | . |
| .                  | .            | .                  | .                  | . |
| Vv04g1092          | .            | .                  | .                  | . |
| .                  | .            | .                  | .                  | . |
| .                  | .            | .                  | .                  | . |
| Vv04g1093          | .            | .                  | .                  | . |
| .                  | .            | .                  | .                  | . |
| .                  | .            | .                  | .                  | . |
| Vv04g1094          | .            | .                  | .                  | . |
| .                  | .            | .                  | .                  | . |
| .                  | .            | .                  | .                  | . |
| Vv04g1095          | .            | .                  | .                  | . |
| .                  | .            | .                  | .                  | . |
| .                  | .            | .                  | .                  | . |
| Vv04g1096          | .            | .                  | .                  | . |
| .                  | .            | .                  | .                  | . |
| .                  | .            | .                  | .                  | . |
| Vv04g1097          | Tc01_g003300 | .                  | Gorai.008G068200.1 | . |
| Gorai.003G015500.1 | .            | .                  | .                  | . |
| .                  | .            | .                  | .                  | . |
| .                  | .            | .                  | .                  | . |
| Vv04g1098          | Tc01_g003290 | .                  | Gorai.008G068100.1 | . |
| Gorai.003G015400.1 | .            | .                  | .                  | . |
| .                  | .            | .                  | .                  | . |
| .                  | .            | .                  | .                  | . |
| Vv04g1099          | Tc01_g003280 | .                  | .                  | . |
| .                  | .            | .                  | .                  | . |

|              |              |                    |                    |   |                    |   |   |
|--------------|--------------|--------------------|--------------------|---|--------------------|---|---|
| Vv04g1100    | .            | .                  | .                  | . | .                  | . | . |
| .            | .            | .                  | .                  | . | .                  | . | . |
| Vv04g1101    | .            | .                  | .                  | . | .                  | . | . |
| .            | .            | .                  | .                  | . | .                  | . | . |
| Vv04g1102    | .            | .                  | .                  | . | .                  | . | . |
| .            | .            | .                  | .                  | . | .                  | . | . |
| Vv04g1103    | .            | .                  | .                  | . | .                  | . | . |
| .            | .            | .                  | .                  | . | .                  | . | . |
| Vv04g1104    | .            | .                  | .                  | . | .                  | . | . |
| .            | .            | .                  | .                  | . | .                  | . | . |
| Vv04g1105    | .            | .                  | .                  | . | .                  | . | . |
| .            | .            | .                  | .                  | . | .                  | . | . |
| Vv04g1106    | .            | .                  | .                  | . | .                  | . | . |
| .            | .            | .                  | .                  | . | .                  | . | . |
| Vv04g1107    | .            | .                  | .                  | . | .                  | . | . |
| .            | .            | .                  | .                  | . | .                  | . | . |
| Vv04g1108    | Tc01_g003270 | Gorai.003G015300.1 | Gorai.007G050700.1 | . | .                  | . | . |
| .            | .            | .                  | .                  | . | .                  | . | . |
| Vv04g1109    | Tc01_g003260 | .                  | .                  | . | Gorai.             | . | . |
| 003G015200.1 | .            | .                  | .                  | . | .                  | . | . |
| .            | .            | .                  | .                  | . | .                  | . | . |
| Vv04g1110    | .            | .                  | .                  | . | .                  | . | . |
| .            | .            | .                  | .                  | . | .                  | . | . |
| Vv04g1111    | .            | .                  | .                  | . | .                  | . | . |
| .            | .            | .                  | .                  | . | .                  | . | . |
| Vv04g1112    | Tc01_g003250 | Gorai.003G015100.1 | .                  | . | Gorai.007G203400.1 | . | . |
| .            | .            | .                  | .                  | . | .                  | . | . |
| Vv04g1113    | .            | .                  | .                  | . | .                  | . | . |
| .            | .            | .                  | .                  | . | .                  | . | . |
| Vv04g1114    | Tc01_g003230 | Gorai.003G014900.1 | Gorai.008G068000.1 | . | .                  | . | . |
| .            | .            | .                  | .                  | . | .                  | . | . |
| Vv04g1115    | Tc01_g003220 | .                  | .                  | . | Gorai.             | . | . |

|                    |                    |                    |   |   |   |                    |   |
|--------------------|--------------------|--------------------|---|---|---|--------------------|---|
| 003G014800.1       | .                  | .                  | . | . | . | .                  | . |
| .                  | .                  | .                  | . | . | . | .                  | . |
| Vv04g1116          | Tc01_g003210       | .                  | . | . | . | Gorai.             | . |
| 003G014700.1       | .                  | .                  | . | . | . | .                  | . |
| .                  | .                  | .                  | . | . | . | .                  | . |
| Vv04g1117          | Tc01_g003180       | .                  | . | . | . | Gorai.             | . |
| 003G014500.1       | Vv18g1089          | Tc08_g002150       | . | . | . | .                  | . |
| Gorai.005G107900.1 | .                  | Gorai.009G273200.1 | . | . | . | .                  | . |
| .                  | .                  | .                  | . | . | . | .                  | . |
| Vv04g1118          | .                  | .                  | . | . | . | .                  | . |
| .                  | .                  | .                  | . | . | . | .                  | . |
| .                  | .                  | .                  | . | . | . | .                  | . |
| Vv04g1119          | Tc01_g003170       | .                  | . | . | . | Gorai.007G203200.1 | . |
| Gorai.003G014400.1 | .                  | .                  | . | . | . | .                  | . |
| .                  | .                  | .                  | . | . | . | .                  | . |
| .                  | .                  | .                  | . | . | . | .                  | . |
| Vv04g1120          | Tc01_g003160       | .                  | . | . | . | Gorai.007G203100.1 | . |
| .                  | .                  | .                  | . | . | . | .                  | . |
| .                  | .                  | .                  | . | . | . | .                  | . |
| Vv04g1121          | Tc01_g003150       | .                  | . | . | . | Gorai.008G067800.1 | . |
| Gorai.007G202900.1 | Gorai.003G014300.1 | .                  | . | . | . | .                  | . |
| .                  | .                  | .                  | . | . | . | .                  | . |
| .                  | .                  | .                  | . | . | . | .                  | . |
| Vv04g1122          | Tc01_g003140       | .                  | . | . | . | Gorai.007G202800.1 | . |
| .                  | .                  | .                  | . | . | . | .                  | . |
| .                  | .                  | .                  | . | . | . | .                  | . |
| Vv04g1123          | Tc01_g003130       | Gorai.007G050600.1 | . | . | . | .                  | . |
| Gorai.007G202700.1 | .                  | Vv18g1092          | . | . | . | .                  | . |
| Tc08_g002170       | Gorai.005G108100.1 | .                  | . | . | . | .                  | . |
| Gorai.010G009900.1 | .                  | .                  | . | . | . | .                  | . |
| .                  | .                  | .                  | . | . | . | .                  | . |
| Vv04g1124          | .                  | .                  | . | . | . | .                  | . |
| .                  | .                  | .                  | . | . | . | .                  | . |
| .                  | .                  | .                  | . | . | . | .                  | . |
| Vv04g1125          | Tc01_g003110       | Gorai.007G050500.1 | . | . | . | .                  | . |
| Gorai.007G202500.1 | Gorai.003G014100.1 | .                  | . | . | . | Vv18g1094          | . |
| Tc08_g002200       | Gorai.002G127500.1 | .                  | . | . | . | Gorai.             | . |
| 009G201300.1       | .                  | .                  | . | . | . | .                  | . |
| .                  | .                  | .                  | . | . | . | .                  | . |
| Vv04g1126          | Tc01_g003100       | .                  | . | . | . | Gorai.008G067600.1 | . |
| .                  | .                  | .                  | . | . | . | .                  | . |
| .                  | .                  | .                  | . | . | . | .                  | . |
| Vv04g1127          | Tc01_g003090       | .                  | . | . | . | Gorai.007G202400.1 | . |
| .                  | .                  | .                  | . | . | . | .                  | . |
| .                  | .                  | .                  | . | . | . | .                  | . |
| Vv04g1128          | .                  | .                  | . | . | . | .                  | . |
| .                  | .                  | .                  | . | . | . | .                  | . |
| .                  | .                  | .                  | . | . | . | .                  | . |
| Vv04g1129          | Tc01_g003080       | .                  | . | . | . | Gorai.007G202100.1 | . |
| Gorai.003G014000.1 | Gorai.011G101500.1 | .                  | . | . | . | Vv18g1096          | . |

|                    |                    |                    |                    |   |        |
|--------------------|--------------------|--------------------|--------------------|---|--------|
|                    | Tc08_g002230       | Gorai.002G127200.1 | .                  | . | .      |
| .                  | Vv01g0637          | .                  | Gorai.013G030100.1 | . | .      |
| .                  | Gorai.008G294400.1 | .                  | .                  | . | .      |
| Vv04g1130          | Tc01_g003070       | .                  | Gorai.008G067500.1 | . | .      |
| .                  | .                  | .                  | .                  | . | .      |
| .                  | .                  | .                  | .                  | . | .      |
| Vv04g1131          | Tc01_g003060       | .                  | .                  | . | Gorai. |
| 003G013900.1       | .                  | .                  | .                  | . | .      |
| .                  | .                  | .                  | .                  | . | .      |
| Vv04g1132          | Tc01_g003050       | Gorai.007G050300.1 | Gorai.             | . | .      |
| 008G067400.1       | .                  | Gorai.011G101400.1 | Vv18g1100          | . | .      |
|                    | Tc08_g002270       | .                  | Gorai.009G201100.1 | . | .      |
| Gorai.009G272900.1 | Gorai.010G009400.1 | .                  | .                  | . | .      |
| .                  | .                  | .                  | .                  | . | .      |
| Vv04g1133          | Tc01_g003040       | .                  | .                  | . | .      |
| Gorai.011G101300.1 | .                  | .                  | .                  | . | .      |
| .                  | .                  | .                  | .                  | . | .      |
| Vv04g1134          | Tc01_g003030       | .                  | Gorai.007G202000.1 | . | .      |
| .                  | .                  | .                  | .                  | . | .      |
| .                  | .                  | .                  | .                  | . | .      |
| Vv04g1135          | Tc01_g003020       | Gorai.007G050200.1 | Gorai.             | . | .      |
| 008G067300.1       | .                  | .                  | .                  | . | .      |
| .                  | .                  | .                  | .                  | . | .      |
| .                  | .                  | .                  | .                  | . | .      |
| Vv04g1136          | .                  | .                  | .                  | . | .      |
| .                  | .                  | .                  | .                  | . | .      |
| .                  | .                  | .                  | .                  | . | .      |
| Vv04g1137          | Tc01_g003000       | Gorai.007G050100.1 | .                  | . | .      |
| .                  | Gorai.011G101200.1 | .                  | .                  | . | .      |
| .                  | .                  | .                  | .                  | . | .      |
| .                  | .                  | .                  | .                  | . | .      |
| Vv04g1138          | Tc01_g002990       | .                  | .                  | . | Gorai. |
| 003G013800.1       | .                  | .                  | .                  | . | .      |
| .                  | .                  | .                  | .                  | . | .      |
| .                  | .                  | .                  | .                  | . | .      |
| Vv04g1139          | Tc01_g002970       | Gorai.007G047100.1 | Gorai.             | . | .      |
| 008G067000.1       | Gorai.003G013700.1 | .                  | .                  | . | .      |
| .                  | .                  | .                  | .                  | . | .      |
| .                  | .                  | .                  | .                  | . | .      |
| Vv04g1140          | Tc01_g002960       | .                  | .                  | . | Gorai. |
| 003G013600.1       | Vv18g1104          | Tc08_g002320       | .                  | . | .      |
| .                  | Gorai.010G009200.1 | .                  | .                  | . | .      |
| .                  | .                  | .                  | .                  | . | .      |
| Vv04g1141          | Tc01_g002950       | Gorai.008G066900.1 | .                  | . | .      |
| .                  | .                  | .                  | .                  | . | .      |
| .                  | .                  | .                  | .                  | . | .      |
| Vv04g1142          | Tc01_g002940       | Gorai.007G201900.1 | .                  | . | .      |
| Gorai.003G013500.1 | .                  | Vv18g1106          | .                  | . | .      |
| Tc08_g002330       | .                  | .                  | .                  | . | .      |
| .                  | .                  | .                  | .                  | . | .      |
| Vv04g1143          | Tc01_g002930       | .                  | .                  | . | .      |



|                    |                    |                    |                    |                    |   |   |   |
|--------------------|--------------------|--------------------|--------------------|--------------------|---|---|---|
| .                  | .                  | .                  | .                  | .                  | . | . | . |
| .                  | .                  | .                  | .                  | .                  | . | . | . |
| Vv04g1144          | .                  | .                  | .                  | Gorai.007G201800.1 | . | . | . |
| Gorai.003G013400.1 | .                  | .                  | Vv18g1109          | Tc08_g002360       | . | . | . |
| .                  | .                  | .                  | Gorai.010G009000.1 | .                  | . | . | . |
| .                  | .                  | .                  | .                  | .                  | . | . | . |
| Vv04g1145          | .                  | .                  | .                  | .                  | . | . | . |
| Vv18g1111          | .                  | .                  | .                  | .                  | . | . | . |
| .                  | .                  | .                  | .                  | .                  | . | . | . |
| Vv04g1146          | .                  | .                  | .                  | .                  | . | . | . |
| .                  | .                  | .                  | .                  | .                  | . | . | . |
| Vv04g1147          | Tc01_g002900       | .                  | .                  | Gorai.008G066700.1 | . | . | . |
| Gorai.003G013300.1 | .                  | Gorai.011G101100.1 | .                  | .                  | . | . | . |
| .                  | .                  | .                  | .                  | .                  | . | . | . |
| .                  | .                  | .                  | .                  | .                  | . | . | . |
| Vv04g1148          | Tc01_g002890       | .                  | .                  | .                  | . | . | . |
| Gorai.011G101000.1 | .                  | .                  | .                  | .                  | . | . | . |
| .                  | .                  | .                  | .                  | .                  | . | . | . |
| Vv04g1149          | Tc01_g002880       | .                  | .                  | Gorai.007G201600.1 | . | . | . |
| .                  | Vv18g1117          | Tc08_g002400       | .                  | .                  | . | . | . |
| Gorai.009G200500.1 | .                  | .                  | .                  | .                  | . | . | . |
| .                  | .                  | .                  | .                  | .                  | . | . | . |
| Vv04g1150          | .                  | .                  | .                  | .                  | . | . | . |
| .                  | .                  | .                  | .                  | .                  | . | . | . |
| Vv04g1151          | Tc01_g002870       | .                  | .                  | Gorai.008G066600.1 | . | . | . |
| .                  | .                  | .                  | .                  | .                  | . | . | . |
| .                  | .                  | .                  | .                  | .                  | . | . | . |
| Vv04g1152          | Tc01_g002860       | .                  | .                  | Gorai.008G066400.1 | . | . | . |
| Gorai.007G201500.1 | .                  | Gorai.011G100900.1 | Vv18g1121          | .                  | . | . | . |
| Tc08_g002450       | Gorai.002G126600.1 | Gorai.005G109100.1 | .                  | .                  | . | . | . |
| Gorai.009G200200.1 | Gorai.009G271900.1 | .                  | .                  | .                  | . | . | . |
| .                  | .                  | .                  | .                  | .                  | . | . | . |
| Vv04g1153          | Tc01_g002850       | .                  | .                  | .                  | . | . | . |
| Gorai.011G100800.1 | .                  | .                  | .                  | .                  | . | . | . |
| .                  | .                  | .                  | .                  | .                  | . | . | . |
| Vv04g1154          | Tc01_g002800       | .                  | .                  | Gorai.008G066300.1 | . | . | . |
| .                  | Vv18g1123          | .                  | .                  | .                  | . | . | . |
| .                  | .                  | .                  | .                  | .                  | . | . | . |
| .                  | .                  | .                  | .                  | .                  | . | . | . |
| Vv04g1155          | .                  | .                  | .                  | .                  | . | . | . |
| .                  | .                  | .                  | .                  | .                  | . | . | . |
| Vv04g1156          | .                  | .                  | .                  | .                  | . | . | . |
| .                  | .                  | .                  | .                  | .                  | . | . | . |
| Vv04g1157          | .                  | .                  | .                  | .                  | . | . | . |
| .                  | .                  | .                  | .                  | .                  | . | . | . |
| .                  | .                  | .                  | .                  | .                  | . | . | . |

|                    |              |                    |                    |                    |   |           |   |
|--------------------|--------------|--------------------|--------------------|--------------------|---|-----------|---|
| Vv04g1158          | .            | .                  | .                  | .                  | . | .         | . |
| .                  | .            | .                  | .                  | .                  | . | .         | . |
| Vv04g1159          | .            | .                  | .                  | Gorai.008G066100.1 | . | .         | . |
| .                  | Vv18g1124    | .                  | Tc08_g002470       | .                  | . | .         | . |
| Gorai.009G200100.1 | .            | .                  | Gorai.010G008500.1 | .                  | . | .         | . |
| .                  | .            | .                  | .                  | .                  | . | .         | . |
| Vv04g1160          | .            | .                  | .                  | .                  | . | .         | . |
| .                  | .            | .                  | .                  | .                  | . | .         | . |
| .                  | .            | .                  | .                  | .                  | . | .         | . |
| Vv04g1161          | .            | .                  | .                  | .                  | . | .         | . |
| Vv18g1125          | .            | .                  | .                  | .                  | . | .         | . |
| .                  | .            | .                  | .                  | .                  | . | .         | . |
| Vv04g1162          | .            | .                  | .                  | Gorai.008G065900.1 | . | .         | . |
| .                  | .            | .                  | .                  | .                  | . | .         | . |
| .                  | .            | .                  | .                  | .                  | . | .         | . |
| Vv04g1163          | Tc01_g002770 | .                  | .                  | .                  | . | .         | . |
| .                  | Vv18g1126    | Tc08_g002490       | .                  | .                  | . | .         | . |
| .                  | .            | .                  | .                  | .                  | . | .         | . |
| Vv04g1164          | .            | .                  | .                  | .                  | . | .         | . |
| .                  | .            | .                  | .                  | .                  | . | Vv01g0617 | . |
| .                  | .            | .                  | .                  | .                  | . | .         | . |
| Vv04g1165          | .            | .                  | .                  | .                  | . | .         | . |
| .                  | .            | .                  | .                  | .                  | . | .         | . |
| .                  | .            | .                  | .                  | .                  | . | .         | . |
| Vv04g1166          | Tc01_g002750 | .                  | .                  | .                  | . | .         | . |
| .                  | .            | .                  | .                  | .                  | . | .         | . |
| Vv01g0616          | .            | Gorai.013G029300.1 | .                  | .                  | . | .         | . |
| .                  | .            | .                  | .                  | .                  | . | .         | . |
| Vv04g1167          | .            | .                  | .                  | .                  | . | .         | . |
| .                  | .            | .                  | .                  | .                  | . | .         | . |
| .                  | .            | .                  | .                  | .                  | . | .         | . |
| Vv04g1168          | .            | .                  | .                  | .                  | . | .         | . |
| .                  | .            | .                  | .                  | .                  | . | Vv01g0614 | . |
| .                  | .            | .                  | .                  | .                  | . | .         | . |
| Vv04g1169          | Tc01_g002740 | .                  | .                  | .                  | . | .         | . |
| .                  | .            | .                  | .                  | .                  | . | .         | . |
| Vv01g0613          | .            | Gorai.013G029200.1 | .                  | .                  | . | .         | . |
| .                  | .            | .                  | .                  | .                  | . | .         | . |
| Vv04g1170          | .            | .                  | .                  | .                  | . | .         | . |
| .                  | .            | .                  | .                  | .                  | . | Vv01g0612 | . |
| .                  | .            | .                  | .                  | .                  | . | .         | . |
| Vv04g1171          | .            | .                  | .                  | .                  | . | .         | . |
| .                  | .            | .                  | .                  | .                  | . | .         | . |
| .                  | .            | .                  | .                  | .                  | . | .         | . |
| Vv04g1172          | .            | .                  | .                  | Gorai.007G201400.1 | . | .         | . |
| .                  | .            | .                  | .                  | .                  | . | .         | . |
| .                  | .            | .                  | .                  | .                  | . | .         | . |
| Vv04g1173          | .            | .                  | .                  | .                  | . | .         | . |
| .                  | .            | .                  | .                  | .                  | . | .         | . |

|                    |                    |                    |                    |                    |        |   |   |
|--------------------|--------------------|--------------------|--------------------|--------------------|--------|---|---|
| Vv04g1174          | .                  | .                  | .                  | .                  | .      | . | . |
| .                  | .                  | .                  | .                  | .                  | .      | . | . |
| Vv04g1175          | Tc01_g002730       | .                  | .                  | .                  | .      | . | . |
| .                  | .                  | .                  | .                  | .                  | .      | . | . |
| Vv04g1176          | Tc01_g002710       | .                  | .                  | Gorai.007G201200.1 | .      | . | . |
| .                  | .                  | .                  | .                  | .                  | .      | . | . |
| Vv04g1177          | Tc01_g002700       | .                  | Gorai.008G065700.1 | .                  | .      | . | . |
| .                  | .                  | .                  | .                  | .                  | .      | . | . |
| Vv04g1178          | Tc01_g002690       | .                  | .                  | .                  | Gorai. | . | . |
| 003G013200.1       | .                  | .                  | .                  | .                  | .      | . | . |
| .                  | .                  | .                  | .                  | .                  | .      | . | . |
| Vv04g1179          | .                  | .                  | .                  | .                  | .      | . | . |
| .                  | .                  | .                  | .                  | .                  | .      | . | . |
| Vv04g1180          | .                  | .                  | .                  | .                  | .      | . | . |
| .                  | .                  | .                  | .                  | .                  | .      | . | . |
| Vv04g1181          | Tc01_g002680       | .                  | .                  | Gorai.007G201000.1 | .      | . | . |
| Gorai.003G013100.1 | .                  | .                  | .                  | .                  | .      | . | . |
| .                  | .                  | .                  | .                  | .                  | .      | . | . |
| Vv04g1182          | .                  | .                  | .                  | .                  | .      | . | . |
| .                  | .                  | .                  | .                  | .                  | .      | . | . |
| Vv04g1183          | Tc01_g002620       | .                  | Gorai.008G065600.1 | .                  | .      | . | . |
| Gorai.007G200900.1 | .                  | .                  | .                  | .                  | .      | . | . |
| .                  | .                  | .                  | .                  | .                  | .      | . | . |
| Vv04g1184          | Tc01_g002610       | .                  | .                  | Gorai.007G200700.1 | .      | . | . |
| Gorai.003G013000.1 | .                  | Gorai.011G100700.1 | Vv18g1131          | .                  | .      | . | . |
| Tc08_g002530       | .                  | Gorai.005G109200.1 | Gorai.             | .                  | .      | . | . |
| 009G199800.1       | .                  | Vv01g0607          | .                  | .                  | .      | . | . |
| .                  | .                  | .                  | .                  | .                  | .      | . | . |
| Vv04g1185          | Tc01_g002600       | .                  | Gorai.008G065500.1 | .                  | .      | . | . |
| Gorai.003G012900.1 | .                  | .                  | .                  | .                  | .      | . | . |
| .                  | .                  | .                  | .                  | .                  | .      | . | . |
| Vv04g1186          | Tc01_g002590       | .                  | Gorai.008G065400.1 | .                  | .      | . | . |
| Gorai.003G012800.1 | .                  | Gorai.011G100600.1 | .                  | .                  | .      | . | . |
| .                  | .                  | .                  | .                  | .                  | .      | . | . |
| Vv04g1187          | Tc01_g002580       | .                  | Gorai.008G065300.1 | .                  | .      | . | . |
| Gorai.007G200600.1 | .                  | Vv18g1139          | .                  | .                  | .      | . | . |
| Tc08_g002600       | Gorai.002G126500.1 | Gorai.005G109600.1 | .                  | .                  | .      | . | . |
| Gorai.009G199300.1 | .                  | Gorai.010G008000.1 | .                  | .                  | .      | . | . |

|                    |              |   |                    |                    |
|--------------------|--------------|---|--------------------|--------------------|
| Vv04g1188          | Tc01_g002570 | . | .                  | Gorai.007G200500.1 |
| .                  | .            | . | .                  | .                  |
| Vv04g1189          | .            | . | .                  | .                  |
| .                  | .            | . | .                  | .                  |
| Vv04g1190          | .            | . | .                  | .                  |
| .                  | .            | . | .                  | .                  |
| Vv04g1191          | .            | . | .                  | .                  |
| .                  | .            | . | .                  | .                  |
| Vv04g1192          | .            | . | .                  | .                  |
| .                  | .            | . | .                  | .                  |
| Vv04g1193          | .            | . | .                  | .                  |
| .                  | .            | . | .                  | .                  |
| Vv04g1194          | .            | . | .                  | .                  |
| .                  | .            | . | .                  | .                  |
| Vv04g1195          | Tc01_g002530 | . | .                  | Gorai.             |
| 003G012700.1       | .            | . | .                  | .                  |
| .                  | .            | . | .                  | .                  |
| Vv04g1196          | .            | . | .                  | .                  |
| .                  | .            | . | .                  | .                  |
| Vv04g1197          | Tc01_g002520 | . | .                  | Gorai.007G199800.1 |
| Gorai.003G012600.1 | .            | . | .                  | Vv18g1146          |
| Tc08_g002670       | .            | . | Gorai.009G198800.1 | .                  |
| .                  | .            | . | .                  | .                  |
| Vv04g1198          | .            | . | .                  | .                  |
| .                  | .            | . | .                  | .                  |
| Vv04g1199          | .            | . | .                  | .                  |
| .                  | .            | . | .                  | .                  |
| Vv04g1200          | .            | . | .                  | .                  |
| .                  | .            | . | .                  | .                  |
| Vv04g1201          | .            | . | .                  | .                  |
| .                  | .            | . | .                  | .                  |
| Vv04g1202          | .            | . | .                  | .                  |
| .                  | .            | . | .                  | .                  |
| Vv04g1203          | .            | . | .                  | .                  |
| .                  | .            | . | .                  | .                  |
| .                  | .            | . | .                  | .                  |

|                    |              |              |   |   |   |                    |   |
|--------------------|--------------|--------------|---|---|---|--------------------|---|
| Vv04g1204          | .            | .            | . | . | . | .                  | . |
| .                  | .            | .            | . | . | . | .                  | . |
| Vv04g1205          | .            | .            | . | . | . | .                  | . |
| .                  | .            | .            | . | . | . | .                  | . |
| Vv04g1206          | .            | .            | . | . | . | .                  | . |
| .                  | .            | .            | . | . | . | .                  | . |
| Vv04g1207          | .            | .            | . | . | . | .                  | . |
| .                  | .            | .            | . | . | . | .                  | . |
| Vv04g1208          | .            | .            | . | . | . | .                  | . |
| .                  | .            | .            | . | . | . | .                  | . |
| Vv04g1209          | .            | .            | . | . | . | .                  | . |
| .                  | .            | .            | . | . | . | .                  | . |
| Vv04g1210          | .            | .            | . | . | . | .                  | . |
| .                  | .            | .            | . | . | . | .                  | . |
| Vv04g1211          | Tc01_g002500 | .            | . | . | . | Gorai.             | . |
| 003G012500.1       | .            | .            | . | . | . | .                  | . |
| .                  | .            | .            | . | . | . | .                  | . |
| Vv04g1212          | Tc01_g002490 | .            | . | . | . | Gorai.007G199700.1 | . |
| .                  | .            | .            | . | . | . | .                  | . |
| .                  | .            | .            | . | . | . | .                  | . |
| Vv04g1213          | Tc01_g002480 | .            | . | . | . | Gorai.007G199600.1 | . |
| .                  | .            | .            | . | . | . | .                  | . |
| .                  | .            | .            | . | . | . | .                  | . |
| Vv04g1214          | .            | .            | . | . | . | .                  | . |
| .                  | .            | .            | . | . | . | .                  | . |
| .                  | .            | .            | . | . | . | .                  | . |
| Vv04g1215          | Tc01_g002470 | .            | . | . | . | .                  | . |
| Gorai.011G100500.1 | .            | .            | . | . | . | .                  | . |
| .                  | .            | .            | . | . | . | .                  | . |
| Vv04g1216          | Tc01_g002450 | .            | . | . | . | Gorai.007G199400.1 | . |
| .                  | .            | .            | . | . | . | .                  | . |
| .                  | Vv03g0008    | Tc02_g007600 | . | . | . | .                  | . |
| .                  | .            | .            | . | . | . | .                  | . |
| Vv04g1217          | .            | .            | . | . | . | Gorai.003G012200.1 | . |
| .                  | Vv18g1154    | .            | . | . | . | Gorai.002G126400.1 | . |
| Gorai.009G198400.1 | .            | .            | . | . | . | .                  | . |
| .                  | .            | .            | . | . | . | .                  | . |
| Vv04g1218          | .            | .            | . | . | . | .                  | . |
| .                  | .            | .            | . | . | . | .                  | . |
| .                  | .            | .            | . | . | . | .                  | . |
| Vv04g1219          | Tc01_g002430 | .            | . | . | . | .                  | . |
| Gorai.011G100400.1 | .            | .            | . | . | . | .                  | . |
| .                  | .            | .            | . | . | . | .                  | . |

|                    |                    |   |   |                    |
|--------------------|--------------------|---|---|--------------------|
| Vv04g1220          | Tc01_g002420       | . | . | Gorai.007G199300.1 |
| .                  | Gorai.011G100300.1 | . | . | .                  |
| .                  | .                  | . | . | .                  |
| .                  | .                  | . | . | .                  |
| Vv04g1221          | Tc01_g002410       | . | . | Gorai.007G199100.1 |
| .                  | Gorai.003G012100.1 | . | . | .                  |
| .                  | .                  | . | . | .                  |
| .                  | .                  | . | . | .                  |
| Vv04g1222          | Tc01_g002400       | . | . | Gorai.007G199000.1 |
| .                  | .                  | . | . | .                  |
| .                  | .                  | . | . | .                  |
| Vv04g1223          | .                  | . | . | .                  |
| .                  | .                  | . | . | .                  |
| .                  | .                  | . | . | .                  |
| Vv04g1224          | .                  | . | . | .                  |
| .                  | .                  | . | . | .                  |
| .                  | .                  | . | . | .                  |
| Vv04g1225          | Tc01_g002390       | . | . | Gorai.             |
| 003G012000.1       | .                  | . | . | .                  |
| .                  | .                  | . | . | .                  |
| Vv04g1226          | Tc01_g002380       | . | . | Gorai.007G198900.1 |
| .                  | Gorai.003G011900.1 | . | . | .                  |
| .                  | .                  | . | . | .                  |
| Tc02_g007580       | Gorai.005G246600.1 | . | . | .                  |
| Vv04g1227          | Tc01_g002370       | . | . | Gorai.007G198800.1 |
| .                  | Gorai.011G100200.1 | . | . | Vv18g1165          |
| Tc08_g002780       | Gorai.002G126200.1 | . | . | Gorai.005G110000.1 |
| .                  | .                  | . | . | .                  |
| .                  | .                  | . | . | .                  |
| Vv04g1228          | .                  | . | . | .                  |
| .                  | .                  | . | . | .                  |
| .                  | .                  | . | . | .                  |
| Vv04g1229          | .                  | . | . | .                  |
| .                  | .                  | . | . | .                  |
| .                  | .                  | . | . | .                  |
| Vv04g1230          | Tc01_g002360       | . | . | Gorai.007G198700.1 |
| .                  | Gorai.011G100100.1 | . | . | Vv18g1179          |
| Tc08_g002870       | Gorai.002G125900.1 | . | . | Gorai.009G197500.1 |
| .                  | Gorai.010G006900.1 | . | . | .                  |
| .                  | .                  | . | . | .                  |
| Vv04g1231          | Tc01_g002350       | . | . | Gorai.007G198400.1 |
| .                  | .                  | . | . | .                  |
| .                  | .                  | . | . | .                  |
| Vv04g1232          | .                  | . | . | .                  |
| .                  | .                  | . | . | .                  |
| .                  | .                  | . | . | .                  |
| Vv04g1233          | Tc01_g002340       | . | . | Gorai.008G065200.1 |
| Gorai.007G198300.1 | .                  | . | . | .                  |
| .                  | .                  | . | . | .                  |
| .                  | .                  | . | . | .                  |

|                    |                    |                    |   |                    |   |   |           |
|--------------------|--------------------|--------------------|---|--------------------|---|---|-----------|
| Vv04g1234          | .                  | .                  | . | .                  | . | . | .         |
| .                  | .                  | .                  | . | .                  | . | . | .         |
| Vv04g1235          | Tc01_g002320       | .                  | . | Gorai.007G198100.1 | . | . | .         |
|                    | Gorai.003G011800.1 | .                  | . | Vv18g1188          | . | . | .         |
| Tc08_g002910       | Gorai.002G125600.1 | .                  | . | Gorai.005G110600.1 | . | . | .         |
| Gorai.009G197300.1 | .                  | .                  | . | Gorai.010G006800.1 | . | . | Vv03g0023 |
|                    | Tc02_g007510       | Gorai.013G033500.1 | . | Gorai.005G247100.1 | . | . | .         |
| .                  | .                  | .                  | . | .                  | . | . | .         |
| Vv04g1236          | Tc01_g002310       | .                  | . | .                  | . | . | .         |
| .                  | .                  | .                  | . | .                  | . | . | .         |
| .                  | .                  | .                  | . | .                  | . | . | .         |
| Vv04g1237          | Tc01_g002280       | .                  | . | .                  | . | . | .         |
| Gorai.011G099900.1 | .                  | .                  | . | .                  | . | . | .         |
| .                  | .                  | .                  | . | .                  | . | . | .         |
| Vv04g1238          | .                  | .                  | . | .                  | . | . | .         |
| .                  | .                  | .                  | . | .                  | . | . | .         |
| .                  | .                  | .                  | . | .                  | . | . | .         |
| Vv04g1239          | Tc01_g002260       | Gorai.007G047400.1 | . | .                  | . | . | .         |
|                    | Gorai.003G011600.1 | .                  | . | .                  | . | . | .         |
| .                  | .                  | .                  | . | .                  | . | . | .         |
| .                  | .                  | .                  | . | .                  | . | . | .         |
| Vv04g1240          | Tc01_g002250       | .                  | . | Gorai.008G064900.1 | . | . | .         |
|                    | Gorai.003G011500.1 | .                  | . | Vv18g1191          | . | . | .         |
| Tc08_g002950       | .                  | .                  | . | Gorai.009G271100.1 | . | . | .         |
| .                  | .                  | .                  | . | .                  | . | . | .         |
| Vv04g1241          | Tc01_g002240       | .                  | . | Gorai.007G198000.1 | . | . | .         |
|                    | Vv18g1192          | .                  | . | Gorai.002G125300.1 | . | . | .         |
| .                  | .                  | .                  | . | .                  | . | . | .         |
| .                  | .                  | .                  | . | .                  | . | . | .         |
| Vv04g1242          | Tc01_g002230       | .                  | . | Gorai.008G064800.1 | . | . | .         |
| .                  | .                  | .                  | . | .                  | . | . | .         |
| .                  | .                  | .                  | . | .                  | . | . | .         |
| Vv04g1243          | Tc01_g002220       | .                  | . | Gorai.008G064700.1 | . | . | .         |
| .                  | .                  | .                  | . | .                  | . | . | .         |
| .                  | .                  | .                  | . | .                  | . | . | .         |
| Vv04g1244          | Tc01_g002210       | .                  | . | Gorai.007G197900.1 | . | . | .         |
| .                  | .                  | .                  | . | .                  | . | . | .         |
| .                  | Vv03g0036          | .                  | . | Gorai.013G032900.1 | . | . | .         |
| Gorai.005G247900.1 | .                  | .                  | . | .                  | . | . | .         |
| Vv04g1245          | .                  | .                  | . | .                  | . | . | .         |
| .                  | .                  | .                  | . | .                  | . | . | .         |
| .                  | .                  | .                  | . | .                  | . | . | .         |
| Vv04g1246          | Tc01_g002190       | .                  | . | Gorai.007G197700.1 | . | . | .         |
|                    | Gorai.011G099800.1 | .                  | . | .                  | . | . | .         |
| .                  | .                  | .                  | . | .                  | . | . | .         |
| .                  | .                  | .                  | . | .                  | . | . | .         |
| Vv04g1247          | Tc01_g002180       | .                  | . | .                  | . | . | .         |
| .                  | .                  | .                  | . | .                  | . | . | .         |
| Vv03g0038          | .                  | .                  | . | .                  | . | . | .         |

|                    |                    |              |                    |                    |                    |        |   |
|--------------------|--------------------|--------------|--------------------|--------------------|--------------------|--------|---|
| Vv04g1248          | .                  | .            | .                  | .                  | .                  | .      | . |
| .                  | .                  | .            | .                  | .                  | .                  | .      | . |
| Vv04g1249          | .                  | .            | Gorai.008G064500.1 | .                  | .                  | Gorai. | . |
| 007G197600.1       | .                  | .            | .                  | .                  | .                  | .      | . |
| .                  | .                  | Vv03g0041    | .                  | Tc02_g006450       | .                  | Gorai. | . |
| 013G032700.1       | Gorai.005G248000.1 | .            | .                  | .                  | .                  | .      | . |
| Vv04g1250          | Tc01_g002140       | .            | .                  | .                  | Gorai.007G197400.1 | .      | . |
| .                  | .                  | .            | .                  | .                  | .                  | .      | . |
| Vv04g1251          | Tc01_g002130       | .            | .                  | .                  | .                  | Gorai. | . |
| 003G011400.1       | Gorai.011G099700.1 | .            | .                  | .                  | .                  | .      | . |
| .                  | .                  | Vv03g0044    | .                  | Tc02_g006430       | .                  | .      | . |
| Gorai.005G248200.1 | .                  | .            | .                  | .                  | .                  | .      | . |
| Vv04g1252          | .                  | .            | .                  | Gorai.007G197200.1 | .                  | .      | . |
| .                  | .                  | .            | .                  | .                  | .                  | .      | . |
| Vv04g1253          | .                  | .            | .                  | .                  | .                  | .      | . |
| .                  | .                  | .            | .                  | .                  | .                  | .      | . |
| Vv04g1254          | .                  | .            | .                  | .                  | .                  | .      | . |
| .                  | .                  | .            | .                  | .                  | .                  | .      | . |
| Vv04g1255          | .                  | .            | .                  | .                  | .                  | .      | . |
| .                  | .                  | .            | .                  | .                  | .                  | .      | . |
| Vv04g1256          | Tc01_g002120       | .            | .                  | .                  | .                  | Gorai. | . |
| 003G011300.1       | .                  | .            | .                  | .                  | .                  | .      | . |
| .                  | .                  | .            | .                  | .                  | .                  | .      | . |
| Vv04g1257          | Tc01_g002110       | .            | .                  | Gorai.008G064400.1 | .                  | .      | . |
| .                  | .                  | .            | .                  | .                  | .                  | .      | . |
| Vv04g1258          | .                  | .            | .                  | .                  | .                  | .      | . |
| .                  | .                  | .            | .                  | .                  | .                  | .      | . |
| Vv04g1259          | .                  | .            | .                  | .                  | .                  | .      | . |
| .                  | .                  | .            | .                  | .                  | .                  | .      | . |
| Vv04g1260          | Tc01_g002090       | .            | .                  | Gorai.008G064200.1 | .                  | .      | . |
| .                  | .                  | .            | .                  | .                  | .                  | .      | . |
| .                  | Vv03g0050          | Tc02_g006400 | .                  | Gorai.013G032400.1 | .                  | .      | . |
| Vv04g1261          | Tc01_g002080       | .            | .                  | .                  | Gorai.007G197100.1 | .      | . |
| .                  | .                  | .            | .                  | .                  | .                  | .      | . |
| Vv04g1262          | .                  | .            | .                  | Gorai.007G197000.1 | .                  | .      | . |
| .                  | .                  | .            | .                  | .                  | .                  | .      | . |
| Vv04g1263          | Tc01_g002070       | .            | .                  | Gorai.008G064100.1 | .                  | .      | . |
| Gorai.007G196900.1 | Gorai.003G011200.1 | .            | .                  | Gorai.011G099600.1 | .                  | .      | . |



|                    |                    |                    |                    |
|--------------------|--------------------|--------------------|--------------------|
| Vv18g1195          | Tc08_g002980       | .                  | Gorai.005G110700.1 |
| Gorai.009G197000.1 | .                  | Gorai.010G006600.1 | .                  |
| Vv03g0051          | Tc02_g006390       | Gorai.013G032300.1 | .                  |
| Gorai.002G004700.1 | .                  | .                  | .                  |
| Vv04g1264          | Tc01_g002060       | Gorai.008G064000.1 | .                  |
| Gorai.003G011100.1 | Gorai.011G099500.1 | .                  | .                  |
| .                  | .                  | .                  | .                  |
| .                  | .                  | .                  | .                  |
| Vv04g1265          | Tc01_g002040       | Gorai.008G063800.1 | .                  |
| Gorai.007G196800.1 | .                  | Vv18g1201          | .                  |
| .                  | .                  | Vv03g0052          | .                  |
| Tc02_g006380       | Gorai.005G248400.1 | Gorai.002G004600.1 | .                  |
| .                  | Gorai.012G154300.1 | .                  | .                  |
| Vv04g1266          | Tc01_g002030       | Gorai.007G196700.1 | .                  |
| Gorai.003G011000.1 | .                  | .                  | .                  |
| .                  | .                  | .                  | .                  |
| .                  | .                  | .                  | .                  |
| Vv04g1267          | .                  | .                  | .                  |
| .                  | .                  | .                  | .                  |
| .                  | .                  | .                  | .                  |
| Vv04g1268          | .                  | .                  | .                  |
| .                  | .                  | .                  | .                  |
| .                  | .                  | .                  | .                  |
| Vv04g1269          | .                  | .                  | .                  |
| .                  | .                  | .                  | .                  |
| .                  | .                  | .                  | .                  |
| Vv04g1270          | .                  | .                  | .                  |
| .                  | .                  | .                  | .                  |
| .                  | .                  | .                  | .                  |
| Vv04g1271          | Tc01_g002000       | .                  | Gorai.             |
| 003G010800.1       | .                  | .                  | .                  |
| .                  | Vv03g0062          | Tc02_g006300       | .                  |
| .                  | .                  | .                  | .                  |
| Vv04g1272          | Tc01_g001980       | Gorai.007G048000.1 | Gorai.             |
| 008G063600.1       | Gorai.007G196400.1 | Gorai.003G010700.1 | .                  |
| .                  | .                  | .                  | .                  |
| .                  | .                  | .                  | .                  |
| Vv04g1273          | Tc01_g001970       | .                  | .                  |
| Vv18g1212          | .                  | Gorai.005G111200.1 | .                  |
| .                  | .                  | .                  | .                  |
| .                  | .                  | .                  | .                  |
| Vv04g1274          | .                  | .                  | .                  |
| .                  | .                  | .                  | .                  |
| .                  | .                  | .                  | .                  |
| Vv04g1275          | Tc01_g001960       | .                  | Gorai.007G196300.1 |
| .                  | .                  | .                  | .                  |
| .                  | .                  | .                  | .                  |
| Vv04g1276          | .                  | .                  | .                  |
| .                  | .                  | .                  | .                  |
| .                  | .                  | .                  | .                  |

|                    |                    |                    |                    |                    |   |
|--------------------|--------------------|--------------------|--------------------|--------------------|---|
| Vv04g1277          | Tc01_g001950       | .                  | .                  | Gorai.007G196200.1 | . |
| .                  | .                  | .                  | .                  | .                  | . |
| .                  | .                  | .                  | .                  | .                  | . |
| Vv04g1278          | Tc01_g001940       | .                  | Gorai.008G063500.1 | .                  | . |
| Gorai.003G010600.1 | .                  | .                  | .                  | .                  | . |
| .                  | .                  | .                  | .                  | .                  | . |
| .                  | .                  | .                  | .                  | .                  | . |
| Vv04g1279          | Tc01_g001930       | .                  | .                  | Gorai.007G196100.1 | . |
| .                  | .                  | .                  | .                  | .                  | . |
| .                  | .                  | .                  | .                  | .                  | . |
| Vv04g1280          | .                  | .                  | .                  | .                  | . |
| .                  | .                  | .                  | .                  | .                  | . |
| .                  | .                  | .                  | .                  | .                  | . |
| Vv04g1281          | Tc01_g001920       | .                  | .                  | Gorai.007G196000.1 | . |
| .                  | Vv18g1233          | Tc08_g003320       | Gorai.             | .                  | . |
| 002G124700.1       | Gorai.005G111400.1 | .                  | Gorai.             | .                  | . |
| 010G005700.1       | .                  | .                  | .                  | .                  | . |
| Vv04g1282          | Tc01_g001910       | Gorai.007G048100.1 | .                  | .                  | . |
| .                  | Gorai.011G099300.1 | .                  | .                  | .                  | . |
| .                  | .                  | .                  | .                  | .                  | . |
| .                  | .                  | .                  | .                  | .                  | . |
| Vv04g1283          | Tc01_g001900       | .                  | Gorai.008G063300.1 | .                  | . |
| .                  | .                  | .                  | .                  | .                  | . |
| .                  | .                  | .                  | .                  | .                  | . |
| Vv04g1284          | Tc01_g001890       | Gorai.007G048200.1 | .                  | .                  | . |
| Gorai.003G010500.1 | Gorai.011G099200.1 | .                  | .                  | .                  | . |
| .                  | .                  | .                  | .                  | .                  | . |
| .                  | .                  | .                  | .                  | .                  | . |
| Vv04g1285          | Tc01_g001880       | Gorai.007G048300.1 | .                  | .                  | . |
| .                  | Vv18g1242          | Tc08_g003390       | Gorai.             | .                  | . |
| 002G124100.1       | Gorai.009G195900.1 | .                  | Gorai.             | .                  | . |
| 010G005400.1       | .                  | .                  | .                  | .                  | . |
| Vv04g1286          | Tc01_g001870       | .                  | Gorai.007G195900.1 | .                  | . |
| .                  | Gorai.011G099000.1 | .                  | .                  | .                  | . |
| .                  | .                  | .                  | .                  | .                  | . |
| .                  | .                  | .                  | .                  | .                  | . |
| Vv04g1287          | Tc01_g001860       | Gorai.007G048500.1 | .                  | .                  | . |
| .                  | .                  | .                  | .                  | .                  | . |
| .                  | Vv03g0073          | Tc02_g006190       | .                  | .                  | . |
| Gorai.008G032700.1 | .                  | .                  | .                  | .                  | . |
| Vv04g1288          | Tc01_g001850       | .                  | Gorai.007G195800.1 | .                  | . |
| Gorai.003G010300.1 | .                  | .                  | .                  | .                  | . |
| .                  | .                  | .                  | .                  | .                  | . |
| .                  | .                  | .                  | .                  | .                  | . |
| Vv04g1289          | .                  | .                  | .                  | .                  | . |
| .                  | .                  | .                  | .                  | .                  | . |
| .                  | .                  | .                  | .                  | .                  | . |
| Vv04g1290          | .                  | Gorai.007G195700.1 | .                  | .                  | . |
| .                  | Vv18g1252          | Tc08_g003440       | Gorai.002G123700.1 | .                  | . |
| .                  | Gorai.009G195400.1 | .                  | Gorai.010G005200.1 | .                  | . |

|                    |                    |   |   |   |                    |   |   |
|--------------------|--------------------|---|---|---|--------------------|---|---|
| Vv04g1291          | .                  | . | . | . | .                  | . | . |
| .                  | .                  | . | . | . | .                  | . | . |
| Vv04g1292          | Tc01_g001810       | . | . | . | Gorai.007G195500.1 | . | . |
| .                  | Gorai.011G098800.1 | . | . | . | .                  | . | . |
| .                  | .                  | . | . | . | .                  | . | . |
| Vv04g1293          | Tc01_g001800       | . | . | . | Gorai.             | . | . |
| 003G010100.1       | .                  | . | . | . | .                  | . | . |
| .                  | .                  | . | . | . | .                  | . | . |
| Vv04g1294          | Tc01_g001790       | . | . | . | Gorai.007G195400.1 | . | . |
| .                  | .                  | . | . | . | .                  | . | . |
| .                  | .                  | . | . | . | .                  | . | . |
| Vv04g1295          | Tc01_g001780       | . | . | . | Gorai.008G063200.1 | . | . |
| .                  | Gorai.011G098600.1 | . | . | . | .                  | . | . |
| .                  | .                  | . | . | . | .                  | . | . |
| .                  | .                  | . | . | . | .                  | . | . |
| Vv04g1296          | Tc01_g001770       | . | . | . | Gorai.             | . | . |
| 003G010000.1       | .                  | . | . | . | .                  | . | . |
| .                  | .                  | . | . | . | .                  | . | . |
| Vv04g1297          | Tc01_g001760       | . | . | . | Gorai.007G195300.1 | . | . |
| Gorai.003G009900.1 | Gorai.011G098500.1 | . | . | . | .                  | . | . |
| .                  | .                  | . | . | . | .                  | . | . |
| .                  | .                  | . | . | . | .                  | . | . |
| Vv04g1298          | Tc01_g001750       | . | . | . | Gorai.007G195200.1 | . | . |
| Gorai.003G009800.1 | .                  | . | . | . | Vv18g1269          | . | . |
| Tc08_g003520       | .                  | . | . | . | Gorai.009G270100.1 | . | . |
| Gorai.010G004800.1 | .                  | . | . | . | .                  | . | . |
| .                  | .                  | . | . | . | .                  | . | . |
| Vv04g1299          | .                  | . | . | . | .                  | . | . |
| Vv18g1272          | Tc08_g003540       | . | . | . | .                  | . | . |
| Gorai.010G004600.1 | .                  | . | . | . | .                  | . | . |
| .                  | .                  | . | . | . | .                  | . | . |
| Vv04g1300          | Tc01_g001740       | . | . | . | Gorai.007G195100.1 | . | . |
| Gorai.003G009700.1 | .                  | . | . | . | .                  | . | . |
| .                  | .                  | . | . | . | .                  | . | . |
| .                  | .                  | . | . | . | .                  | . | . |
| Vv04g1301          | Tc01_g001730       | . | . | . | Gorai.008G063100.1 | . | . |
| Gorai.007G194900.1 | Gorai.003G009600.1 | . | . | . | .                  | . | . |
| .                  | .                  | . | . | . | .                  | . | . |
| .                  | .                  | . | . | . | .                  | . | . |
| Vv04g1302          | Tc01_g001700       | . | . | . | .                  | . | . |
| .                  | .                  | . | . | . | .                  | . | . |
| .                  | .                  | . | . | . | .                  | . | . |
| Vv04g1303          | .                  | . | . | . | .                  | . | . |
| .                  | .                  | . | . | . | .                  | . | . |
| .                  | .                  | . | . | . | .                  | . | . |
| Vv04g1304          | Tc01_g001680       | . | . | . | Gorai.008G062900.1 | . | . |
| Gorai.007G194700.1 | .                  | . | . | . | .                  | . | . |

|                    |                    |                    |                    |                    |   |   |   |
|--------------------|--------------------|--------------------|--------------------|--------------------|---|---|---|
| .                  | .                  | .                  | .                  | .                  | . | . | . |
| .                  | .                  | .                  | .                  | .                  | . | . | . |
| Vv04g1305          | .                  | .                  | .                  | .                  | . | . | . |
| .                  | .                  | .                  | .                  | .                  | . | . | . |
| .                  | .                  | .                  | .                  | .                  | . | . | . |
| Vv04g1306          | Tc01_g001670       | .                  | .                  | Gorai.007G194500.1 | . | . | . |
|                    | Gorai.003G009500.1 | Gorai.011G098300.1 | .                  | .                  | . | . | . |
| .                  | .                  | .                  | .                  | .                  | . | . | . |
| .                  | .                  | .                  | .                  | .                  | . | . | . |
| Vv04g1307          | Tc01_g001660       | .                  | .                  | Gorai.007G194400.1 | . | . | . |
|                    | Gorai.003G009400.1 | .                  | .                  | .                  | . | . | . |
| .                  | .                  | .                  | .                  | .                  | . | . | . |
| .                  | .                  | .                  | .                  | .                  | . | . | . |
| Vv04g1308          | Tc01_g001650       | Vv03g0143          | Tc02_g005550       | .                  | . | . | . |
|                    | Gorai.005G252200.1 | .                  | .                  | Gorai.007G194300.1 | . | . | . |
| .                  | .                  | .                  | .                  | .                  | . | . | . |
| .                  | .                  | .                  | .                  | .                  | . | . | . |
| Vv04g1309          | .                  | .                  | .                  | .                  | . | . | . |
| .                  | .                  | .                  | .                  | .                  | . | . | . |
| .                  | .                  | .                  | .                  | .                  | . | . | . |
| Vv04g1310          | Tc01_g001620       | Gorai.007G048700.1 | Gorai.             | .                  | . | . | . |
| 008G062700.1       | Gorai.007G193900.1 | .                  | .                  | .                  | . | . | . |
| .                  | .                  | .                  | .                  | .                  | . | . | . |
| .                  | .                  | .                  | .                  | .                  | . | . | . |
| Tc02_g005240       | .                  | .                  | .                  | Vv03g0178          | . | . | . |
| 008G035100.1       | .                  | Gorai.002G003600.1 | Gorai.             | .                  | . | . | . |
| Vv04g1311          | .                  | .                  | .                  | .                  | . | . | . |
| .                  | .                  | .                  | .                  | .                  | . | . | . |
| .                  | .                  | .                  | .                  | .                  | . | . | . |
| Vv04g1312          | Tc01_g001610       | Gorai.008G062600.1 | .                  | .                  | . | . | . |
| Gorai.007G193800.1 | .                  | Vv18g1291          | .                  | .                  | . | . | . |
| .                  | Gorai.009G194200.1 | .                  | .                  | .                  | . | . | . |
| .                  | .                  | .                  | .                  | .                  | . | . | . |
| Vv04g1313          | .                  | Gorai.008G062500.1 | Gorai.             | .                  | . | . | . |
| 007G193700.1       | .                  | .                  | .                  | .                  | . | . | . |
| .                  | .                  | .                  | .                  | .                  | . | . | . |
| .                  | .                  | .                  | .                  | .                  | . | . | . |
| .                  | .                  | .                  | .                  | .                  | . | . | . |
| Vv04g1314          | Tc01_g001590       | Gorai.007G048900.1 | Gorai.             | .                  | . | . | . |
| 008G062300.1       | Gorai.007G193600.1 | Gorai.003G009200.1 | .                  | .                  | . | . | . |
| .                  | Vv18g1294          | Tc08_g003730       | Gorai.002G122900.1 | .                  | . | . | . |
| Gorai.005G112000.1 | Gorai.009G194100.1 | .                  | Gorai.             | .                  | . | . | . |
| 010G003100.1       | .                  | .                  | .                  | .                  | . | . | . |
| Vv04g1315          | Tc01_g001580       | .                  | Gorai.007G193400.1 | .                  | . | . | . |
| .                  | .                  | Vv18g1295          | Tc08_g003740       | .                  | . | . | . |
| .                  | Gorai.009G194000.1 | .                  | .                  | .                  | . | . | . |
| .                  | .                  | .                  | .                  | .                  | . | . | . |
| .                  | .                  | .                  | .                  | .                  | . | . | . |
| Vv04g1316          | Tc01_g001570       | .                  | Gorai.             | .                  | . | . | . |
| 003G009100.1       | .                  | .                  | .                  | .                  | . | . | . |
| .                  | .                  | .                  | .                  | .                  | . | . | . |
| .                  | .                  | .                  | .                  | .                  | . | . | . |
| Vv04g1317          | Tc01_g001550       | .                  | .                  | .                  | . | . | . |
| .                  | .                  | .                  | .                  | .                  | . | . | . |
| .                  | .                  | .                  | .                  | .                  | . | . | . |

|                    |                    |                    |              |                    |        |
|--------------------|--------------------|--------------------|--------------|--------------------|--------|
| Vv04g1318          | Tc01_g001540       | .                  | .            | .                  | Gorai. |
| 003G008900.1       | .                  | .                  | .            | .                  | .      |
| Vv04g1319          | Tc01_g001530       | .                  | .            | Gorai.007G193300.1 | .      |
| Gorai.003G008800.1 | .                  | .                  | .            | .                  | .      |
| .                  | .                  | .                  | .            | .                  | .      |
| Vv04g1320          | .                  | .                  | .            | .                  | .      |
| .                  | .                  | .                  | .            | .                  | .      |
| Vv04g1321          | .                  | .                  | .            | .                  | .      |
| .                  | .                  | .                  | .            | .                  | .      |
| Vv04g1322          | Tc01_g001520       | Gorai.007G049000.1 | .            | .                  | .      |
| .                  | .                  | .                  | .            | .                  | .      |
| Vv04g1323          | Tc01_g001510       | .                  | .            | Gorai.007G193200.1 | .      |
| .                  | .                  | .                  | .            | .                  | .      |
| Vv04g1324          | Tc01_g001500       | .                  | .            | .                  | Gorai. |
| 003G008700.1       | .                  | .                  | .            | .                  | .      |
| Vv04g1325          | .                  | .                  | .            | .                  | .      |
| .                  | .                  | .                  | .            | .                  | .      |
| Vv04g1326          | .                  | .                  | .            | .                  | .      |
| .                  | .                  | .                  | .            | .                  | .      |
| Vv04g1327          | Tc01_g001490       | .                  | .            | .                  | .      |
| .                  | .                  | .                  | .            | .                  | .      |
| Vv04g1328          | .                  | .                  | .            | Gorai.003G008600.1 | .      |
| .                  | .                  | .                  | .            | .                  | .      |
| Vv04g1329          | Tc01_g001480       | .                  | .            | .                  | Gorai. |
| 003G008500.1       | .                  | .                  | .            | .                  | .      |
| .                  | Vv03g0194          | Tc02_g005110       | .            | .                  | .      |
| Gorai.008G035600.1 | .                  | .                  | .            | .                  | .      |
| Vv04g1330          | Tc01_g001470       | Gorai.007G049200.1 | .            | .                  | .      |
| Gorai.003G008400.1 | .                  | .                  | .            | .                  | .      |
| .                  | .                  | .                  | .            | .                  | .      |
| Vv04g1331          | Tc01_g001460       | .                  | .            | Gorai.007G193100.1 | .      |
| Gorai.003G008300.1 | .                  | .                  | .            | .                  | .      |
| .                  | Gorai.005G253900.1 | Vv03g0196          | Tc02_g005090 | .                  | .      |
| Vv04g1332          | Tc01_g001450       | .                  | .            | Gorai.007G193000.1 | .      |
| .                  | .                  | .                  | .            | .                  | .      |
| Vv04g1333          | Tc01_g001440       | .                  | .            | Gorai.007G192900.1 | .      |

|                    |              |                    |  |                    |                    |           |  |
|--------------------|--------------|--------------------|--|--------------------|--------------------|-----------|--|
| Vv04g1334          |              |                    |  |                    |                    |           |  |
| Vv04g1335          |              |                    |  | Gorai.007G192700.1 |                    |           |  |
| Vv04g1336          |              |                    |  |                    |                    |           |  |
| Vv04g1337          |              |                    |  |                    |                    |           |  |
| Vv04g1338          | Tc01_g001430 |                    |  |                    | Gorai.007G192600.1 |           |  |
| Vv04g1339          | Tc01_g001420 |                    |  |                    | Gorai.             |           |  |
| 003G008200.1       |              |                    |  |                    |                    |           |  |
| Vv04g1340          | Tc01_g001410 |                    |  | Gorai.007G049300.1 |                    |           |  |
| Gorai.003G008100.1 |              |                    |  |                    |                    |           |  |
| Vv04g1341          | Tc01_g001400 |                    |  |                    | Gorai.007G192500.1 |           |  |
| Vv04g1342          | Tc01_g001390 |                    |  |                    |                    |           |  |
| Gorai.011G098200.1 |              |                    |  |                    |                    |           |  |
| Vv04g1343          | Tc01_g001380 |                    |  |                    |                    |           |  |
| Gorai.011G096500.1 |              |                    |  |                    |                    |           |  |
| Vv04g1344          |              |                    |  |                    |                    |           |  |
| Vv04g1345          | Tc01_g001370 |                    |  |                    |                    |           |  |
| Vv04g1346          |              |                    |  | Gorai.008G062200.1 |                    |           |  |
| Vv04g1347          | Tc01_g001360 |                    |  |                    | Gorai.007G192400.1 |           |  |
| Vv04g1348          |              |                    |  |                    |                    |           |  |
| Tc02_g005050       |              | Gorai.002G188800.1 |  |                    |                    | Vv03g0200 |  |
| Gorai.008G035900.1 |              |                    |  |                    |                    |           |  |
| Vv04g1349          |              |                    |  |                    |                    |           |  |

|                    |                    |                    |                    |                    |           |
|--------------------|--------------------|--------------------|--------------------|--------------------|-----------|
| .                  | .                  | .                  | .                  | .                  | Vv03g0201 |
| Vv04g1350          | .                  | .                  | Gorai.002G003200.1 | .                  | .         |
| .                  | .                  | .                  | .                  | .                  | .         |
| Vv04g1351          | .                  | .                  | .                  | .                  | .         |
| .                  | .                  | .                  | .                  | .                  | Vv03g0202 |
| Tc02_g005040       | Gorai.002G197200.1 | .                  | .                  | .                  | .         |
| Gorai.008G036000.1 | .                  | .                  | .                  | .                  | .         |
| Vv04g1352          | Tc01_g001350       | .                  | .                  | Gorai.007G192300.1 | .         |
| Gorai.003G008000.1 | .                  | Vv18g1312          | .                  | .                  | .         |
| Tc08_g003890       | Gorai.005G112500.1 | Gorai.009G193300.1 | .                  | .                  | .         |
| Gorai.009G269600.1 | Gorai.010G002600.1 | Vv03g0204          | .                  | .                  | .         |
| Tc02_g005020       | Gorai.002G197500.1 | .                  | .                  | .                  | .         |
| Gorai.008G036100.1 | .                  | .                  | .                  | .                  | .         |
| Vv04g1353          | Tc01_g001330       | Gorai.007G049400.1 | .                  | .                  | .         |
| .                  | Vv18g1313          | Tc08_g003910       | Gorai.             | .                  | .         |
| 002G122600.1       | Gorai.009G193200.1 | .                  | .                  | .                  | .         |
| .                  | .                  | .                  | .                  | .                  | .         |
| Vv04g1354          | .                  | .                  | .                  | .                  | .         |
| .                  | .                  | .                  | .                  | .                  | .         |
| Vv04g1355          | .                  | .                  | .                  | .                  | .         |
| .                  | .                  | .                  | .                  | .                  | .         |
| Vv04g1356          | Tc01_g001320       | .                  | .                  | Gorai.             | .         |
| 003G007800.1       | .                  | .                  | .                  | .                  | .         |
| .                  | Vv03g0209          | Tc02_g004960       | Gorai.002G198000.1 | .                  | .         |
| .                  | .                  | .                  | .                  | .                  | .         |
| Vv04g1357          | Tc01_g001300       | .                  | Gorai.007G192100.1 | .                  | .         |
| Gorai.003G007500.1 | .                  | .                  | .                  | .                  | .         |
| .                  | .                  | .                  | .                  | .                  | .         |
| Vv04g1358          | .                  | .                  | .                  | .                  | .         |
| .                  | .                  | .                  | .                  | .                  | .         |
| Vv04g1359          | Tc01_g001240       | .                  | Gorai.007G191800.1 | .                  | .         |
| Gorai.003G007000.1 | .                  | Vv18g1339          | .                  | .                  | .         |
| Tc08_g004010       | Gorai.002G122200.1 | .                  | Gorai.009G192500.1 | .                  | .         |
| .                  | .                  | .                  | .                  | .                  | .         |
| Vv04g1360          | Tc01_g001230       | .                  | Gorai.007G191700.1 | .                  | .         |
| Gorai.003G006800.1 | .                  | Vv18g1340          | .                  | .                  | .         |
| Tc08_g004020       | Gorai.002G121900.1 | .                  | .                  | .                  | .         |
| .                  | .                  | .                  | .                  | .                  | .         |
| Vv04g1361          | .                  | .                  | .                  | .                  | .         |
| .                  | .                  | .                  | .                  | .                  | .         |
| Vv04g1362          | .                  | .                  | Gorai.007G191500.1 | .                  | .         |
| Gorai.003G006700.1 | .                  | .                  | .                  | .                  | .         |

|                    |                    |                    |                    |                    |   |   |   |
|--------------------|--------------------|--------------------|--------------------|--------------------|---|---|---|
| .                  | .                  | .                  | .                  | .                  | . | . | . |
| .                  | .                  | .                  | .                  | .                  | . | . | . |
| Vv04g1363          | Tc01_g001200       | .                  | .                  | .                  | . | . | . |
| .                  | .                  | .                  | .                  | .                  | . | . | . |
| .                  | .                  | .                  | .                  | .                  | . | . | . |
| Vv04g1364          | Tc01_g001190       | Gorai.007G049900.1 | .                  | .                  | . | . | . |
|                    | Gorai.003G006600.1 | .                  | .                  | .                  | . | . | . |
| .                  | .                  | .                  | .                  | .                  | . | . | . |
| .                  | .                  | .                  | .                  | .                  | . | . | . |
| Vv04g1365          | .                  | .                  | .                  | .                  | . | . | . |
| .                  | .                  | .                  | .                  | .                  | . | . | . |
| .                  | .                  | .                  | .                  | .                  | . | . | . |
| Vv04g1366          | Tc01_g001170       | .                  | .                  | Gorai.007G191200.1 | . | . | . |
|                    | Gorai.003G006400.1 | .                  | .                  | .                  | . | . | . |
| .                  | .                  | .                  | .                  | .                  | . | . | . |
| .                  | .                  | .                  | .                  | .                  | . | . | . |
| Vv04g1367          | Tc01_g001150       | .                  | .                  | Gorai.007G191000.1 | . | . | . |
| .                  | .                  | .                  | .                  | .                  | . | . | . |
| .                  | .                  | .                  | .                  | .                  | . | . | . |
| Vv04g1368          | .                  | .                  | .                  | .                  | . | . | . |
| .                  | .                  | .                  | .                  | .                  | . | . | . |
| .                  | .                  | .                  | .                  | .                  | . | . | . |
| Vv04g1369          | Tc01_g001100       | .                  | .                  | Gorai.008G061900.1 | . | . | . |
|                    | Gorai.003G006000.1 | .                  | .                  | .                  | . | . | . |
| .                  | .                  | .                  | .                  | .                  | . | . | . |
| .                  | .                  | .                  | .                  | .                  | . | . | . |
| Vv04g1370          | .                  | .                  | .                  | .                  | . | . | . |
| .                  | .                  | .                  | .                  | .                  | . | . | . |
| .                  | .                  | .                  | .                  | .                  | . | . | . |
| Vv04g1371          | Tc01_g001090       | .                  | .                  | Gorai.008G061800.1 | . | . | . |
| Gorai.007G190600.1 | .                  | .                  | .                  | Vv18g0195          | . | . | . |
| Tc08_g004190       | Gorai.005G112700.1 | Gorai.009G191400.1 | .                  | .                  | . | . | . |
|                    | Gorai.009G269000.1 | .                  | .                  | .                  | . | . | . |
| .                  | .                  | .                  | .                  | .                  | . | . | . |
| .                  | .                  | .                  | .                  | .                  | . | . | . |
| Vv04g1372          | Tc01_g001070       | .                  | .                  | Gorai.             | . | . | . |
| 003G005800.1       | .                  | .                  | .                  | .                  | . | . | . |
| .                  | .                  | .                  | .                  | .                  | . | . | . |
| .                  | .                  | .                  | .                  | .                  | . | . | . |
| Vv04g1373          | .                  | .                  | .                  | .                  | . | . | . |
| Vv18g0191          | .                  | .                  | .                  | .                  | . | . | . |
| .                  | .                  | .                  | .                  | .                  | . | . | . |
| .                  | .                  | .                  | .                  | .                  | . | . | . |
| Vv04g1374          | .                  | .                  | .                  | Gorai.007G190500.1 | . | . | . |
| Gorai.003G005700.1 | .                  | Vv18g0190          | .                  | .                  | . | . | . |
| .                  | .                  | .                  | .                  | .                  | . | . | . |
| .                  | .                  | .                  | .                  | .                  | . | . | . |
| Vv04g1375          | Tc01_g001060       | .                  | .                  | .                  | . | . | . |
| .                  | .                  | .                  | .                  | .                  | . | . | . |
| .                  | .                  | .                  | .                  | .                  | . | . | . |
| Vv04g1376          | .                  | .                  | .                  | Gorai.003G005500.1 | . | . | . |
| .                  | Vv18g0181          | Tc08_g004280       | Gorai.002G120800.1 | .                  | . | . | . |
| .                  | .                  | .                  | .                  | .                  | . | . | . |



|                    |              |   |   |                    |   |                    |   |
|--------------------|--------------|---|---|--------------------|---|--------------------|---|
| Vv04g1377          | .            | . | . | .                  | . | .                  | . |
| .                  | .            | . | . | .                  | . | .                  | . |
| Vv04g1378          | Tc01_g001040 | . | . | Gorai.008G061600.1 | . | .                  | . |
| .                  | Vv18g0180    | . | . | .                  | . | .                  | . |
| Gorai.009G268500.1 | .            | . | . | .                  | . | .                  | . |
| .                  | .            | . | . | .                  | . | .                  | . |
| Vv04g1379          | .            | . | . | .                  | . | .                  | . |
| .                  | .            | . | . | .                  | . | .                  | . |
| Vv04g1380          | .            | . | . | .                  | . | .                  | . |
| .                  | .            | . | . | .                  | . | .                  | . |
| Vv04g1381          | Tc01_g001030 | . | . | .                  | . | Gorai.             | . |
| 003G005400.1       | .            | . | . | .                  | . | .                  | . |
| .                  | .            | . | . | .                  | . | .                  | . |
| Vv04g1382          | Tc01_g001020 | . | . | .                  | . | Gorai.             | . |
| 003G005300.1       | .            | . | . | .                  | . | .                  | . |
| .                  | .            | . | . | .                  | . | .                  | . |
| Vv04g1383          | .            | . | . | .                  | . | .                  | . |
| .                  | .            | . | . | .                  | . | .                  | . |
| Vv04g1384          | Tc01_g001010 | . | . | .                  | . | Gorai.007G190300.1 | . |
| Gorai.003G005200.1 | .            | . | . | .                  | . | .                  | . |
| .                  | .            | . | . | .                  | . | .                  | . |
| Vv04g1385          | Tc01_g001000 | . | . | Gorai.008G061500.1 | . | .                  | . |
| .                  | .            | . | . | .                  | . | .                  | . |
| Vv04g1386          | Tc01_g000990 | . | . | .                  | . | Gorai.007G190200.1 | . |
| Gorai.003G005100.1 | .            | . | . | .                  | . | .                  | . |
| .                  | .            | . | . | .                  | . | .                  | . |
| Vv04g1387          | Tc01_g000980 | . | . | .                  | . | Gorai.             | . |
| 003G005000.1       | .            | . | . | .                  | . | .                  | . |
| .                  | .            | . | . | .                  | . | .                  | . |
| Vv04g1388          | Tc01_g000970 | . | . | Gorai.008G061400.1 | . | .                  | . |
| .                  | .            | . | . | .                  | . | .                  | . |
| Vv04g1389          | Tc01_g000960 | . | . | .                  | . | Gorai.             | . |
| 003G004900.1       | .            | . | . | .                  | . | .                  | . |
| .                  | .            | . | . | .                  | . | .                  | . |
| Vv04g1390          | .            | . | . | .                  | . | .                  | . |
| .                  | .            | . | . | .                  | . | .                  | . |
| Vv04g1391          | .            | . | . | .                  | . | .                  | . |
| .                  | .            | . | . | .                  | . | .                  | . |
| Vv04g1392          | .            | . | . | .                  | . | .                  | . |

|              |                    |   |   |                    |                    |   |   |
|--------------|--------------------|---|---|--------------------|--------------------|---|---|
| .            | .                  | . | . | .                  | .                  | . | . |
| .            | .                  | . | . | .                  | .                  | . | . |
| Vv04g1393    | Tc01_g000950       | . | . | Gorai.008G059900.1 | .                  | . | . |
|              | Gorai.003G004800.1 | . | . | .                  | .                  | . | . |
| .            | .                  | . | . | .                  | .                  | . | . |
| .            | .                  | . | . | .                  | .                  | . | . |
| Vv04g1394    | .                  | . | . | .                  | .                  | . | . |
| .            | .                  | . | . | .                  | .                  | . | . |
| .            | .                  | . | . | .                  | .                  | . | . |
| Vv04g1395    | Tc01_g000930       | . | . | .                  | Gorai.             | . | . |
| 003G004700.1 | .                  | . | . | .                  | .                  | . | . |
| .            | .                  | . | . | .                  | .                  | . | . |
| Vv04g1396    | .                  | . | . | .                  | Gorai.003G004600.1 | . | . |
| .            | .                  | . | . | .                  | .                  | . | . |
| .            | .                  | . | . | .                  | .                  | . | . |
| Vv04g1397    | .                  | . | . | .                  | .                  | . | . |
| .            | .                  | . | . | .                  | .                  | . | . |
| .            | .                  | . | . | .                  | .                  | . | . |
| Vv04g1398    | Tc01_g000550       | . | . | .                  | Gorai.             | . | . |
| 003G002700.1 | .                  | . | . | .                  | .                  | . | . |
| .            | .                  | . | . | .                  | .                  | . | . |
| Vv04g1399    | .                  | . | . | .                  | .                  | . | . |
| .            | .                  | . | . | .                  | .                  | . | . |
| .            | .                  | . | . | .                  | .                  | . | . |
| Vv04g1400    | Tc01_g000540       | . | . | .                  | Gorai.             | . | . |
| 003G002600.1 | .                  | . | . | .                  | .                  | . | . |
| .            | .                  | . | . | .                  | .                  | . | . |
| Vv04g1401    | .                  | . | . | .                  | .                  | . | . |
| .            | .                  | . | . | .                  | .                  | . | . |
| .            | .                  | . | . | .                  | .                  | . | . |
| Vv04g1402    | Tc01_g000530       | . | . | .                  | Gorai.             | . | . |
| 003G002500.1 | .                  | . | . | .                  | .                  | . | . |
| .            | .                  | . | . | .                  | .                  | . | . |
| Vv04g1403    | .                  | . | . | .                  | .                  | . | . |
| .            | .                  | . | . | .                  | .                  | . | . |
| .            | .                  | . | . | .                  | .                  | . | . |
| Vv04g1404    | Tc01_g000520       | . | . | .                  | .                  | . | . |
| .            | .                  | . | . | .                  | .                  | . | . |
| .            | .                  | . | . | .                  | .                  | . | . |
| Vv04g1405    | .                  | . | . | .                  | .                  | . | . |
| .            | .                  | . | . | .                  | .                  | . | . |
| .            | .                  | . | . | .                  | .                  | . | . |
| Vv04g1406    | .                  | . | . | .                  | .                  | . | . |
| .            | .                  | . | . | .                  | .                  | . | . |
| .            | .                  | . | . | .                  | .                  | . | . |
| Vv04g1407    | Tc01_g000510       | . | . | .                  | .                  | . | . |
| .            | .                  | . | . | .                  | .                  | . | . |
| .            | .                  | . | . | .                  | .                  | . | . |
| Vv04g1408    | .                  | . | . | .                  | .                  | . | . |
| .            | .                  | . | . | .                  | .                  | . | . |

|                    |                    |                    |   |                    |   |
|--------------------|--------------------|--------------------|---|--------------------|---|
| Vv04g1409          | Tc01_g000500       | .                  | . | .                  | . |
| Vv18g0171          | Tc08_g004370       | .                  | . | Gorai.             | . |
| 009G190400.1       | .                  | .                  | . | .                  | . |
| Vv04g1410          | Tc01_g000490       | .                  | . | .                  | . |
| .                  | .                  | .                  | . | .                  | . |
| Vv04g1411          | Tc01_g000480       | .                  | . | Gorai.             | . |
| 003G002400.1       | .                  | .                  | . | .                  | . |
| Vv04g1412          | Tc01_g000470       | .                  | . | Gorai.             | . |
| 003G002300.1       | .                  | .                  | . | .                  | . |
| Vv04g1413          | Tc01_g000460       | .                  | . | .                  | . |
| Vv02g0264          | Tc03_g029890       | .                  | . | Gorai.007G111400.1 | . |
| Gorai.008G258900.1 | .                  | .                  | . | .                  | . |
| Vv04g1414          | .                  | .                  | . | .                  | . |
| .                  | .                  | .                  | . | .                  | . |
| Vv04g1415          | .                  | .                  | . | Gorai.003G002200.1 | . |
| .                  | .                  | .                  | . | .                  | . |
| Vv04g1416          | .                  | .                  | . | Gorai.003G002000.1 | . |
| .                  | .                  | .                  | . | .                  | . |
| Vv04g1417          | .                  | .                  | . | Gorai.003G000600.1 | . |
| .                  | .                  | .                  | . | .                  | . |
| Vv04g1418          | .                  | .                  | . | .                  | . |
| .                  | .                  | .                  | . | .                  | . |
| Vv04g1419          | .                  | .                  | . | .                  | . |
| Vv18g0154          | .                  | .                  | . | .                  | . |
| Vv02g0280          | Gorai.004G129000.1 | .                  | . | .                  | . |
| Vv04g1420          | Tc01_g010700       | .                  | . | .                  | . |
| Vv18g0153          | Tc08_g004530       | Gorai.002G119700.1 | . | .                  | . |
| .                  | Vv02g0318          | .                  | . | .                  | . |
| .                  | Gorai.008G262100.1 | .                  | . | .                  | . |
| Vv04g1421          | .                  | Gorai.007G185500.1 | . | .                  | . |
| .                  | .                  | .                  | . | .                  | . |
| Vv04g1422          | .                  | .                  | . | .                  | . |
| .                  | .                  | .                  | . | .                  | . |
| Vv04g1423          | .                  | .                  | . | .                  | . |
| .                  | .                  | .                  | . | .                  | . |
| .                  | .                  | .                  | . | .                  | . |

|           |              |   |   |   |   |   |   |
|-----------|--------------|---|---|---|---|---|---|
| Vv04g1424 | .            | . | . | . | . | . | . |
| .         | .            | . | . | . | . | . | . |
| Vv04g1425 | .            | . | . | . | . | . | . |
| .         | .            | . | . | . | . | . | . |
| Vv04g1426 | .            | . | . | . | . | . | . |
| .         | .            | . | . | . | . | . | . |
| Vv04g1427 | .            | . | . | . | . | . | . |
| .         | .            | . | . | . | . | . | . |
| Vv04g1428 | .            | . | . | . | . | . | . |
| .         | .            | . | . | . | . | . | . |
| Vv04g1429 | .            | . | . | . | . | . | . |
| .         | .            | . | . | . | . | . | . |
| Vv04g1430 | .            | . | . | . | . | . | . |
| .         | .            | . | . | . | . | . | . |
| Vv04g1431 | .            | . | . | . | . | . | . |
| .         | .            | . | . | . | . | . | . |
| Vv04g1432 | .            | . | . | . | . | . | . |
| .         | .            | . | . | . | . | . | . |
| Vv04g1433 | .            | . | . | . | . | . | . |
| .         | .            | . | . | . | . | . | . |
| Vv04g1434 | Tc01_g010740 | . | . | . | . | . | . |
| .         | .            | . | . | . | . | . | . |
| Vv04g1435 | .            | . | . | . | . | . | . |
| .         | .            | . | . | . | . | . | . |
| Vv04g1436 | Tc01_g010750 | . | . | . | . | . | . |
| .         | .            | . | . | . | . | . | . |
| Vv04g1437 | .            | . | . | . | . | . | . |
| .         | .            | . | . | . | . | . | . |
| Vv04g1438 | .            | . | . | . | . | . | . |
| .         | .            | . | . | . | . | . | . |
| Vv04g1439 | .            | . | . | . | . | . | . |
| .         | .            | . | . | . | . | . | . |
| Vv04g1440 | .            | . | . | . | . | . | . |
| .         | .            | . | . | . | . | . | . |

|                    |                    |                    |   |                    |           |   |
|--------------------|--------------------|--------------------|---|--------------------|-----------|---|
| Vv04g1441          | .                  | .                  | . | .                  | .         | . |
| Vv01g0836          | .                  | Gorai.002G164300.1 | . | Gorai.005G184500.1 | .         | . |
|                    | Gorai.009G344100.1 | .                  | . | .                  | .         | . |
| Vv04g1442          | .                  | .                  | . | .                  | .         | . |
| Vv04g1443          | Tc01_g010770       | Gorai.007G063300.1 | . | .                  | .         | . |
|                    | Vv01g0835          | .                  | . | .                  | .         | . |
| Vv04g1444          | .                  | .                  | . | .                  | .         | . |
| Vv01g0834          | .                  | .                  | . | .                  | .         | . |
| Vv04g1445          | .                  | .                  | . | .                  | .         | . |
| Vv04g1446          | .                  | .                  | . | .                  | .         | . |
| Vv01g0833          | .                  | .                  | . | .                  | .         | . |
| Vv02g0321          | .                  | .                  | . | .                  | .         | . |
| Vv04g1447          | .                  | .                  | . | .                  | .         | . |
| Vv04g1448          | .                  | .                  | . | .                  | .         | . |
| Vv01g0832          | Tc02_g023290       | Gorai.005G184400.1 | . | .                  | .         | . |
|                    | Vv02g0322          | .                  | . | .                  | .         | . |
| Vv04g1449          | .                  | .                  | . | .                  | Vv02g0327 | . |
| Vv04g1450          | .                  | .                  | . | .                  | .         | . |
| Vv01g0821          | Tc02_g023300       | Gorai.005G184300.1 | . | .                  | .         | . |
| Vv04g1451          | .                  | .                  | . | .                  | .         | . |
| Vv04g1452          | .                  | .                  | . | .                  | .         | . |
| Vv04g1453          | Tc01_g010790       | .                  | . | .                  | .         | . |
| Vv04g1454          | .                  | .                  | . | .                  | .         | . |
| Vv04g1455          | Tc01_g010800       | .                  | . | .                  | .         | . |
| Gorai.011G115200.1 | .                  | .                  | . | .                  | .         | . |

|                    |              |                    |                    |                    |   |   |
|--------------------|--------------|--------------------|--------------------|--------------------|---|---|
| Vv04g1456          | Tc01_g010810 | .                  | .                  | .                  | . | . |
| Vv02g0331          | .            | .                  | .                  | Gorai.008G262400.1 | . | . |
| Vv04g1457          | .            | .                  | .                  | .                  | . | . |
| Vv04g1458          | Tc01_g010820 | .                  | .                  | .                  | . | . |
| Vv04g1459          | Tc01_g010830 | .                  | .                  | .                  | . | . |
| Vv04g1460          | .            | .                  | .                  | .                  | . | . |
| Vv04g1461          | Tc01_g010880 | Gorai.007G063500.1 | .                  | .                  | . | . |
|                    | Vv02g0352    | Tc03_g027520       | Gorai.004G212300.1 | .                  | . | . |
| Gorai.003G158400.1 |              |                    |                    | .                  | . | . |
| Vv04g1462          | .            | .                  | .                  | .                  | . | . |
| Vv04g1463          | .            | .                  | .                  | .                  | . | . |
| Vv04g1464          | Tc01_g010900 | Gorai.007G063600.1 | .                  | .                  | . | . |
| Vv04g1465          | Tc01_g010920 | .                  | .                  | .                  | . | . |
| Gorai.011G115300.1 | .            | .                  | .                  | .                  | . | . |
| Vv04g1466          | Tc01_g010940 | .                  | .                  | .                  | . | . |
| Vv04g1467          | Tc01_g010950 | .                  | .                  | .                  | . | . |
| Vv01g0816          | .            | .                  | .                  | .                  | . | . |
| Vv04g1468          | .            | .                  | .                  | .                  | . | . |
| Vv04g1469          | .            | .                  | .                  | .                  | . | . |
| Vv04g1470          | Tc01_g011020 | Gorai.007G063800.1 | .                  | .                  | . | . |
| Vv04g1471          | Tc09_g009880 | .                  | .                  | .                  | . | . |
| .                  | .            | .                  | .                  | .                  | . | . |
| .                  | .            | .                  | .                  | .                  | . | . |

|           |              |   |   |   |   |   |
|-----------|--------------|---|---|---|---|---|
| Vv04g1472 | Tc01_g011030 | . | . | . | . | . |
| .         | .            | . | . | . | . | . |
| Vv04g1473 | .            | . | . | . | . | . |
| .         | .            | . | . | . | . | . |
| Vv04g1474 | .            | . | . | . | . | . |
| .         | .            | . | . | . | . | . |
| Vv04g1475 | Tc01_g011040 | . | . | . | . | . |
| .         | .            | . | . | . | . | . |
| Vv04g1476 | .            | . | . | . | . | . |
| .         | .            | . | . | . | . | . |
| Vv04g1477 | .            | . | . | . | . | . |
| .         | .            | . | . | . | . | . |
| Vv04g1478 | .            | . | . | . | . | . |
| .         | .            | . | . | . | . | . |
| Vv04g1479 | .            | . | . | . | . | . |
| .         | .            | . | . | . | . | . |
| Vv04g1480 | .            | . | . | . | . | . |
| .         | .            | . | . | . | . | . |
| Vv04g1481 | .            | . | . | . | . | . |
| .         | .            | . | . | . | . | . |
| Vv04g1482 | .            | . | . | . | . | . |
| .         | .            | . | . | . | . | . |
| Vv04g1483 | .            | . | . | . | . | . |
| .         | .            | . | . | . | . | . |
| Vv04g1484 | .            | . | . | . | . | . |
| .         | .            | . | . | . | . | . |
| Vv04g1485 | .            | . | . | . | . | . |
| .         | .            | . | . | . | . | . |
| Vv04g1486 | Tc01_g011050 | . | . | . | . | . |
| .         | .            | . | . | . | . | . |
| Vv04g1487 | Tc01_g011060 | . | . | . | . | . |
| .         | .            | . | . | . | . | . |
| Vv04g1488 | .            | . | . | . | . | . |
| .         | .            | . | . | . | . | . |

|                    |                    |                    |   |   |   |   |   |
|--------------------|--------------------|--------------------|---|---|---|---|---|
| Vv04g1489          | .                  | .                  | . | . | . | . | . |
| .                  | .                  | .                  | . | . | . | . | . |
| Vv04g1490          | .                  | .                  | . | . | . | . | . |
| .                  | .                  | .                  | . | . | . | . | . |
| Vv04g1491          | .                  | .                  | . | . | . | . | . |
| .                  | .                  | .                  | . | . | . | . | . |
| Vv04g1492          | Tc01_g011070       | .                  | . | . | . | . | . |
| .                  | .                  | .                  | . | . | . | . | . |
| Vv04g1493          | .                  | .                  | . | . | . | . | . |
| .                  | .                  | .                  | . | . | . | . | . |
| Vv04g1494          | Tc01_g011090       | .                  | . | . | . | . | . |
| .                  | .                  | .                  | . | . | . | . | . |
| Vv04g1495          | .                  | .                  | . | . | . | . | . |
| .                  | .                  | .                  | . | . | . | . | . |
| Vv04g1496          | Tc01_g011140       | .                  | . | . | . | . | . |
| .                  | .                  | .                  | . | . | . | . | . |
| Vv04g1497          | Tc01_g011150       | .                  | . | . | . | . | . |
| .                  | .                  | .                  | . | . | . | . | . |
| Vv04g1498          | Tc01_g011160       | Gorai.007G064600.1 | . | . | . | . | . |
| .                  | Gorai.011G115500.1 | .                  | . | . | . | . | . |
| .                  | .                  | .                  | . | . | . | . | . |
| Vv04g1499          | Tc01_g011170       | Gorai.007G064700.1 | . | . | . | . | . |
| .                  | Gorai.011G115700.1 | .                  | . | . | . | . | . |
| .                  | .                  | .                  | . | . | . | . | . |
| Vv04g1500          | .                  | .                  | . | . | . | . | . |
| .                  | .                  | .                  | . | . | . | . | . |
| Vv04g1501          | Tc01_g011180       | .                  | . | . | . | . | . |
| Gorai.011G115900.1 | .                  | .                  | . | . | . | . | . |
| .                  | .                  | .                  | . | . | . | . | . |
| Vv04g1502          | .                  | .                  | . | . | . | . | . |
| .                  | .                  | .                  | . | . | . | . | . |
| Vv04g1503          | .                  | .                  | . | . | . | . | . |
| .                  | .                  | .                  | . | . | . | . | . |
| Vv04g1504          | Tc01_g011220       | .                  | . | . | . | . | . |
| .                  | .                  | .                  | . | . | . | . | . |



|                    |                    |                    |   |   |   |   |
|--------------------|--------------------|--------------------|---|---|---|---|
| Vv04g1505          | Tc01_g011230       | .                  | . | . | . | . |
| Gorai.011G116000.1 | .                  | .                  | . | . | . | . |
| Vv04g1506          | Tc01_g011280       | .                  | . | . | . | . |
| .                  | .                  | .                  | . | . | . | . |
| Vv04g1507          | Tc01_g011320       | .                  | . | . | . | . |
| .                  | .                  | .                  | . | . | . | . |
| Vv04g1508          | Tc01_g021630       | .                  | . | . | . | . |
| .                  | .                  | .                  | . | . | . | . |
| Vv04g1509          | Tc09_g009460       | .                  | . | . | . | . |
| .                  | .                  | .                  | . | . | . | . |
| Vv04g1510          | Tc01_g011380       | .                  | . | . | . | . |
| .                  | .                  | .                  | . | . | . | . |
| Vv04g1511          | Tc01_g011390       | .                  | . | . | . | . |
| Vv18g1411          | .                  | .                  | . | . | . | . |
| Vv04g1512          | Tc01_g011410       | .                  | . | . | . | . |
| .                  | .                  | .                  | . | . | . | . |
| Vv04g1513          | Tc01_g011420       | Gorai.007G064800.1 | . | . | . | . |
| .                  | Gorai.011G116600.1 | Vv18g1409          | . | . | . | . |
| .                  | .                  | .                  | . | . | . | . |
| Vv04g1514          | Tc01_g011430       | Gorai.007G064900.1 | . | . | . | . |
| .                  | .                  | .                  | . | . | . | . |
| Vv04g1515          | .                  | .                  | . | . | . | . |
| .                  | .                  | .                  | . | . | . | . |
| Vv04g1516          | Tc01_g037920       | .                  | . | . | . | . |
| .                  | .                  | .                  | . | . | . | . |
| Vv04g1517          | .                  | .                  | . | . | . | . |
| .                  | .                  | .                  | . | . | . | . |
| Vv04g1518          | Tc01_g037930       | .                  | . | . | . | . |
| .                  | .                  | .                  | . | . | . | . |
| Vv04g1519          | .                  | .                  | . | . | . | . |
| .                  | .                  | .                  | . | . | . | . |
| Vv04g1520          | Tc01_g011470       | .                  | . | . | . | . |
| Vv18g1402          | .                  | .                  | . | . | . | . |
| .                  | .                  | .                  | . | . | . | . |

|                    |              |                    |                    |   |   |   |   |
|--------------------|--------------|--------------------|--------------------|---|---|---|---|
| Vv04g1521          | .            | .                  | .                  | . | . | . | . |
| .                  | .            | .                  | .                  | . | . | . | . |
| Vv04g1522          | Tc01_g011480 | .                  | .                  | . | . | . | . |
| .                  | .            | .                  | .                  | . | . | . | . |
| Vv04g1523          | .            | .                  | .                  | . | . | . | . |
| Vv18g1397          | .            | .                  | Gorai.005G082400.1 | . | . | . | . |
| Vv04g1524          | .            | Gorai.007G065000.1 | .                  | . | . | . | . |
| Gorai.011G122400.1 | .            | .                  | .                  | . | . | . | . |
| .                  | .            | .                  | .                  | . | . | . | . |
| Vv04g1525          | Tc01_g011540 | .                  | .                  | . | . | . | . |
| Vv18g1394          | Tc08_g004030 | .                  | .                  | . | . | . | . |
| .                  | .            | .                  | .                  | . | . | . | . |
| Vv04g1526          | .            | .                  | .                  | . | . | . | . |
| .                  | .            | .                  | .                  | . | . | . | . |
| Vv04g1527          | Tc01_g011550 | Gorai.007G065100.1 | .                  | . | . | . | . |
| .                  | .            | .                  | .                  | . | . | . | . |
| Vv04g1528          | .            | .                  | .                  | . | . | . | . |
| .                  | .            | .                  | .                  | . | . | . | . |
| Vv04g1529          | .            | .                  | .                  | . | . | . | . |
| .                  | .            | .                  | .                  | . | . | . | . |
| Vv04g1530          | .            | .                  | .                  | . | . | . | . |
| .                  | .            | .                  | .                  | . | . | . | . |
| Vv04g1531          | .            | Gorai.007G065500.1 | .                  | . | . | . | . |
| .                  | .            | .                  | .                  | . | . | . | . |
| Vv04g1532          | .            | .                  | .                  | . | . | . | . |
| .                  | .            | .                  | .                  | . | . | . | . |
| Vv04g1533          | Tc01_g011600 | .                  | .                  | . | . | . | . |
| .                  | .            | .                  | .                  | . | . | . | . |
| Vv04g1534          | Tc01_g011610 | Gorai.007G065600.1 | .                  | . | . | . | . |
| .                  | .            | .                  | .                  | . | . | . | . |
| Vv04g1535          | .            | .                  | .                  | . | . | . | . |
| .                  | .            | .                  | .                  | . | . | . | . |
| Vv04g1536          | Tc01_g011620 | .                  | .                  | . | . | . | . |
| .                  | .            | .                  | .                  | . | . | . | . |
| Vv04g1537          | Tc01_g011650 | .                  | .                  | . | . | . | . |

|                    |              |                    |   |   |        |   |
|--------------------|--------------|--------------------|---|---|--------|---|
| Gorai.011G120000.1 | .            | .                  | . | . | .      | . |
| Vv04g1538          | Tc01_g011710 | .                  | . | . | .      | . |
| Vv04g1539          | .            | .                  | . | . | .      | . |
| Vv04g1540          | Tc01_g022000 | .                  | . | . | .      | . |
| Vv04g1541          | .            | .                  | . | . | .      | . |
| Vv04g1542          | .            | .                  | . | . | .      | . |
| Vv04g1543          | Tc01_g011740 | .                  | . | . | .      | . |
| Vv04g1544          | .            | .                  | . | . | .      | . |
| Vv04g1545          | Tc01_g011750 | Gorai.007G065800.1 | . | . | .      | . |
| 005G083200.1       | Vv18g1386    | .                  | . | . | Gorai. | . |
| Vv04g1546          | .            | .                  | . | . | .      | . |
| Vv04g1547          | Tc01_g011760 | .                  | . | . | .      | . |
| Gorai.011G119900.1 | .            | .                  | . | . | .      | . |
| Vv04g1548          | .            | .                  | . | . | .      | . |
| Vv04g1549          | Tc01_g011790 | .                  | . | . | .      | . |
| Vv04g1550          | Tc01_g011800 | .                  | . | . | .      | . |
| Vv04g1551          | Tc01_g011810 | .                  | . | . | .      | . |
| Gorai.011G119800.1 | .            | .                  | . | . | .      | . |
| Vv04g1552          | Tc01_g011820 | .                  | . | . | .      | . |
| Vv04g1553          | Tc01_g011830 | .                  | . | . | .      | . |

|                    |              |   |   |                    |   |   |   |
|--------------------|--------------|---|---|--------------------|---|---|---|
| Vv04g1554          | .            | . | . | .                  | . | . | . |
| .                  | .            | . | . | .                  | . | . | . |
| Vv04g1555          | .            | . | . | .                  | . | . | . |
| .                  | .            | . | . | .                  | . | . | . |
| Vv04g1556          | Tc01_g038130 | . | . | .                  | . | . | . |
| Vv18g1382          | .            | . | . | .                  | . | . | . |
| .                  | .            | . | . | .                  | . | . | . |
| Vv04g1557          | Tc01_g011910 | . | . | .                  | . | . | . |
| .                  | .            | . | . | .                  | . | . | . |
| Vv04g1558          | .            | . | . | .                  | . | . | . |
| .                  | .            | . | . | .                  | . | . | . |
| Vv04g1559          | .            | . | . | .                  | . | . | . |
| .                  | .            | . | . | .                  | . | . | . |
| Vv04g1560          | Tc01_g011930 | . | . | .                  | . | . | . |
| .                  | .            | . | . | .                  | . | . | . |
| Vv04g1561          | Tc01_g011940 | . | . | .                  | . | . | . |
| .                  | .            | . | . | .                  | . | . | . |
| Vv04g1562          | .            | . | . | .                  | . | . | . |
| .                  | .            | . | . | .                  | . | . | . |
| Vv04g1563          | .            | . | . | .                  | . | . | . |
| .                  | .            | . | . | .                  | . | . | . |
| Vv04g1564          | Tc01_g011950 | . | . | .                  | . | . | . |
| Vv18g1376          | .            | . | . | Gorai.005G084100.1 | . | . | . |
| .                  | .            | . | . | .                  | . | . | . |
| Vv04g1565          | .            | . | . | .                  | . | . | . |
| .                  | .            | . | . | .                  | . | . | . |
| Vv04g1566          | Tc01_g011990 | . | . | .                  | . | . | . |
| .                  | .            | . | . | .                  | . | . | . |
| Vv04g1567          | Tc01_g012000 | . | . | .                  | . | . | . |
| Gorai.011G119300.1 | .            | . | . | .                  | . | . | . |
| .                  | .            | . | . | .                  | . | . | . |
| Vv04g1568          | .            | . | . | .                  | . | . | . |
| .                  | .            | . | . | .                  | . | . | . |
| Vv04g1569          | Tc01_g012040 | . | . | .                  | . | . | . |
| Gorai.011G119100.1 | .            | . | . | .                  | . | . | . |
| .                  | .            | . | . | .                  | . | . | . |

|                    |                    |   |   |                    |   |
|--------------------|--------------------|---|---|--------------------|---|
| Vv04g1570          | Tc01_g012050       | . | . | .                  | . |
| Vv18g1348          | .                  | . | . | Gorai.005G085000.1 | . |
| Gorai.009G251000.1 | Gorai.009G251000.1 | . | . | .                  | . |
| Vv04g1571          | .                  | . | . | .                  | . |
| Vv04g1572          | Tc01_g012060       | . | . | .                  | . |
| Vv04g1573          | Tc01_g012070       | . | . | .                  | . |
| Vv04g1574          | .                  | . | . | .                  | . |
| Vv04g1575          | Tc01_g012090       | . | . | .                  | . |
| Vv04g1576          | .                  | . | . | .                  | . |
| Vv04g1577          | Tc01_g012220       | . | . | .                  | . |
| Vv04g1578          | .                  | . | . | .                  | . |
| Vv04g1579          | .                  | . | . | .                  | . |
| Vv04g1580          | .                  | . | . | .                  | . |
| Vv04g1581          | Tc01_g018550       | . | . | .                  | . |
| Vv04g1582          | .                  | . | . | .                  | . |
| Vv04g1583          | .                  | . | . | .                  | . |
| Vv04g1584          | .                  | . | . | .                  | . |
| Vv04g1585          | Tc01_g018680       | . | . | .                  | . |
| Vv04g1586          | Tc01_g012260       | . | . | .                  | . |

|           |                    |                    |  |  |  |  |  |
|-----------|--------------------|--------------------|--|--|--|--|--|
| Vv04g1587 |                    |                    |  |  |  |  |  |
| Vv04g1588 |                    |                    |  |  |  |  |  |
| Vv04g1589 |                    |                    |  |  |  |  |  |
| Vv04g1590 |                    |                    |  |  |  |  |  |
| Vv04g1591 |                    |                    |  |  |  |  |  |
| Vv04g1592 |                    |                    |  |  |  |  |  |
| Vv04g1593 |                    |                    |  |  |  |  |  |
| Vv04g1594 |                    |                    |  |  |  |  |  |
| Vv04g1595 | Tc01_g025360       | Gorai.007G066000.1 |  |  |  |  |  |
|           | Gorai.011G118900.1 |                    |  |  |  |  |  |
| Vv04g1596 | Tc01_g025400       |                    |  |  |  |  |  |
|           | Gorai.011G115900.1 |                    |  |  |  |  |  |
| Vv04g1597 | Tc01_g012290       |                    |  |  |  |  |  |
| Vv04g1598 |                    |                    |  |  |  |  |  |
| Vv04g1599 | Tc01_g000230       |                    |  |  |  |  |  |
| Vv04g1600 |                    |                    |  |  |  |  |  |
| Vv04g1601 | Tc01_g000220       |                    |  |  |  |  |  |
| Vv04g1602 | Tc01_g000210       |                    |  |  |  |  |  |

|           |              |   |   |   |   |   |
|-----------|--------------|---|---|---|---|---|
| Vv04g1603 | Tc01_g000190 | . | . | . | . | . |
| .         | .            | . | . | . | . | . |
| Vv04g1604 | .            | . | . | . | . | . |
| .         | .            | . | . | . | . | . |
| Vv04g1605 | Tc01_g000170 | . | . | . | . | . |
| .         | .            | . | . | . | . | . |
| Vv04g1606 | .            | . | . | . | . | . |
| .         | .            | . | . | . | . | . |
| Vv04g1607 | .            | . | . | . | . | . |
| .         | .            | . | . | . | . | . |
| Vv04g1608 | .            | . | . | . | . | . |
| .         | .            | . | . | . | . | . |
| Vv04g1609 | .            | . | . | . | . | . |
| .         | .            | . | . | . | . | . |
| Vv04g1610 | Tc01_g000160 | . | . | . | . | . |
| .         | .            | . | . | . | . | . |
| Vv04g1611 | .            | . | . | . | . | . |
| .         | .            | . | . | . | . | . |
| Vv04g1612 | .            | . | . | . | . | . |
| .         | .            | . | . | . | . | . |
| Vv04g1613 | .            | . | . | . | . | . |
| .         | .            | . | . | . | . | . |
| Vv04g1614 | .            | . | . | . | . | . |
| .         | .            | . | . | . | . | . |
| Vv04g1615 | .            | . | . | . | . | . |
| .         | .            | . | . | . | . | . |
| Vv04g1616 | .            | . | . | . | . | . |
| .         | .            | . | . | . | . | . |
| Vv04g1617 | .            | . | . | . | . | . |
| .         | .            | . | . | . | . | . |
| Vv04g1618 | .            | . | . | . | . | . |
| .         | .            | . | . | . | . | . |
| Vv04g1619 | .            | . | . | . | . | . |

|           |              |   |   |   |   |   |   |
|-----------|--------------|---|---|---|---|---|---|
| .         | .            | . | . | . | . | . | . |
| .         | .            | . | . | . | . | . | . |
| Vv04g1620 | Tc01_g000150 | . | . | . | . | . | . |
| .         | .            | . | . | . | . | . | . |
| Vv04g1621 | .            | . | . | . | . | . | . |
| .         | .            | . | . | . | . | . | . |
| Vv04g1622 | .            | . | . | . | . | . | . |
| .         | .            | . | . | . | . | . | . |
| Vv04g1623 | .            | . | . | . | . | . | . |
| .         | .            | . | . | . | . | . | . |
| Vv04g1624 | Tc01_g000140 | . | . | . | . | . | . |
| .         | .            | . | . | . | . | . | . |
| Vv04g1625 | .            | . | . | . | . | . | . |
| .         | .            | . | . | . | . | . | . |
| Vv04g1626 | Tc01_g000130 | . | . | . | . | . | . |
| .         | .            | . | . | . | . | . | . |
| Vv04g1627 | Tc01_g000090 | . | . | . | . | . | . |
| .         | .            | . | . | . | . | . | . |
| Vv04g1628 | .            | . | . | . | . | . | . |
| .         | .            | . | . | . | . | . | . |
| Vv04g1629 | .            | . | . | . | . | . | . |
| .         | .            | . | . | . | . | . | . |
| Vv04g1630 | .            | . | . | . | . | . | . |
| .         | .            | . | . | . | . | . | . |
| Vv04g1631 | .            | . | . | . | . | . | . |
| .         | .            | . | . | . | . | . | . |
| Vv04g1632 | .            | . | . | . | . | . | . |
| .         | .            | . | . | . | . | . | . |
| Vv04g1633 | Tc01_g001700 | . | . | . | . | . | . |
| .         | .            | . | . | . | . | . | . |
| Vv04g1634 | .            | . | . | . | . | . | . |
| .         | .            | . | . | . | . | . | . |
| Vv04g1635 | Tc01_g002040 | . | . | . | . | . | . |
| .         | .            | . | . | . | . | . | . |
| .         | .            | . | . | . | . | . | . |



|                    |                    |                    |                    |                    |        |   |   |
|--------------------|--------------------|--------------------|--------------------|--------------------|--------|---|---|
| Vv04g1636          | .                  | .                  | .                  | .                  | .      | . | . |
| .                  | .                  | .                  | .                  | .                  | .      | . | . |
| Vv04g1637          | .                  | .                  | .                  | .                  | .      | . | . |
| .                  | .                  | .                  | .                  | .                  | .      | . | . |
| Vv04g1638          | .                  | .                  | .                  | .                  | .      | . | . |
| .                  | .                  | .                  | .                  | .                  | .      | . | . |
| Vv05g0001          | .                  | .                  | Gorai.005G060800.1 | .                  | .      | . | . |
| .                  | .                  | .                  | .                  | .                  | .      | . | . |
| Vv05g0002          | .                  | .                  | .                  | .                  | .      | . | . |
| .                  | .                  | .                  | .                  | .                  | .      | . | . |
| Vv05g0003          | .                  | .                  | .                  | .                  | .      | . | . |
| .                  | .                  | .                  | .                  | .                  | .      | . | . |
| Vv05g0004          | .                  | .                  | .                  | .                  | .      | . | . |
| .                  | .                  | .                  | .                  | .                  | .      | . | . |
| Vv05g0005          | Tc04_g028280       | .                  | Gorai.006G261800.1 | .                  | .      | . | . |
| .                  | .                  | .                  | .                  | .                  | .      | . | . |
| Vv05g0006          | .                  | .                  | .                  | .                  | .      | . | . |
| Vv14g0248          | .                  | .                  | .                  | .                  | .      | . | . |
| .                  | .                  | .                  | .                  | .                  | .      | . | . |
| Vv05g0007          | .                  | .                  | .                  | .                  | .      | . | . |
| .                  | .                  | .                  | .                  | .                  | .      | . | . |
| Vv05g0008          | Tc04_g028290       | .                  | Gorai.006G261700.1 | .                  | Gorai. | . | . |
| 005G060900.1       | .                  | .                  | .                  | .                  | .      | . | . |
| .                  | .                  | .                  | .                  | .                  | .      | . | . |
| Vv05g0009          | Tc04_g028300       | .                  | Gorai.005G061000.1 | .                  | .      | . | . |
| .                  | .                  | Vv07g0406          | Tc01_g030580       | .                  | Gorai. | . | . |
| 007G128200.1       | Gorai.008G145200.1 | .                  | .                  | Gorai.004G090000.1 | .      | . | . |
| .                  | .                  | .                  | .                  | .                  | .      | . | . |
| Vv05g0010          | Tc04_g028320       | .                  | .                  | .                  | .      | . | . |
| .                  | .                  | .                  | .                  | .                  | .      | . | . |
| Vv07g0413          | Tc01_g030610       | .                  | Gorai.007G128000.1 | .                  | .      | . | . |
| .                  | Gorai.004G090300.1 | .                  | .                  | Vv14g0219          | .      | . | . |
| Tc04_g028320       | .                  | Gorai.007G300700.1 | .                  | Gorai.007G128000.1 | .      | . | . |
| .                  | .                  | .                  | .                  | .                  | .      | . | . |
| Vv05g0011          | Tc04_g028330       | .                  | .                  | .                  | Gorai. | . | . |
| 011G191400.1       | .                  | .                  | .                  | .                  | .      | . | . |
| .                  | .                  | .                  | .                  | .                  | .      | . | . |
| Vv05g0012          | .                  | Gorai.006G261600.1 | .                  | .                  | .      | . | . |
| Gorai.011G191600.1 | .                  | .                  | .                  | .                  | .      | . | . |
| .                  | .                  | .                  | .                  | .                  | .      | . | . |
| .                  | .                  | .                  | .                  | .                  | .      | . | . |

|              |                    |                    |                    |   |
|--------------|--------------------|--------------------|--------------------|---|
| Vv05g0013    | Tc04_g028350       | .                  | Gorai.005G061100.1 | . |
|              | Gorai.011G191700.1 | .                  | .                  | . |
| .            | .                  | .                  | .                  | . |
| Vv05g0014    | .                  | .                  | .                  | . |
| .            | .                  | .                  | .                  | . |
| Vv05g0015    | .                  | .                  | .                  | . |
| .            | .                  | .                  | .                  | . |
| Vv05g0016    | .                  | .                  | .                  | . |
| .            | .                  | .                  | .                  | . |
| Vv05g0017    | .                  | .                  | .                  | . |
| .            | .                  | .                  | .                  | . |
| Vv05g0018    | .                  | .                  | .                  | . |
| .            | .                  | .                  | .                  | . |
| Vv05g0019    | .                  | .                  | .                  | . |
| .            | .                  | .                  | .                  | . |
| Vv05g0020    | .                  | .                  | .                  | . |
| .            | .                  | .                  | .                  | . |
| Vv05g0021    | .                  | .                  | .                  | . |
| .            | .                  | .                  | .                  | . |
| Vv05g0022    | Tc04_g028360       | .                  | Gorai.006G076600.1 | . |
|              | Gorai.011G191800.1 | .                  | .                  | . |
| .            | .                  | .                  | .                  | . |
| Vv05g0023    | Tc04_g028370       | .                  | Gorai.006G076700.1 | . |
| .            | .                  | .                  | .                  | . |
| Vv05g0024    | .                  | .                  | .                  | . |
| .            | .                  | .                  | .                  | . |
| Vv05g0025    | Tc04_g028390       | Gorai.006G261400.1 | Gorai.             | . |
| 005G061300.1 | Gorai.011G192100.1 | .                  | .                  | . |
| .            | .                  | .                  | .                  | . |
| Vv05g0026    | Tc04_g028400       | Gorai.005G061400.1 | .                  | . |
|              | Gorai.011G192200.1 | .                  | .                  | . |
| .            | .                  | .                  | .                  | . |
| Vv05g0027    | Tc04_g028410       | Gorai.006G261300.1 | .                  | . |
| .            | .                  | .                  | .                  | . |
| Vv05g0028    | .                  | .                  | .                  | . |

|                    |                    |                    |                    |   |
|--------------------|--------------------|--------------------|--------------------|---|
| Vv07g0428          | Tc01_g030790       | Gorai.007G127300.1 | .                  | . |
|                    | Gorai.004G052100.1 | Gorai.004G239000.1 | .                  | . |
| Vv05g0029          | Tc04_g028420       | .                  | Gorai.005G061500.1 | . |
| .                  | .                  | .                  | .                  | . |
| Vv05g0030          | Tc04_g028430       | .                  | .                  | . |
| Gorai.002G028600.1 | .                  | .                  | .                  | . |
| Vv05g0031          | .                  | .                  | Gorai.011G192300.1 | . |
|                    | .                  | .                  | .                  | . |
| Vv14g0209          | .                  | .                  | .                  | . |
| Vv05g0032          | Tc04_g028440       | .                  | .                  | . |
|                    | Vv07g0429          | Tc01_g030800       | .                  | . |
| Gorai.004G091300.1 | .                  | .                  | .                  | . |
| Vv05g0033          | .                  | .                  | .                  | . |
| .                  | .                  | .                  | .                  | . |
| Vv05g0034          | Tc04_g028450       | .                  | .                  | . |
| .                  | .                  | .                  | .                  | . |
| Vv05g0035          | Tc04_g028460       | Gorai.006G261200.1 | Gorai.             | . |
| 005G061600.1       | .                  | .                  | .                  | . |
| .                  | .                  | .                  | .                  | . |
| Vv05g0036          | Tc04_g028470       | Gorai.006G261100.1 | .                  | . |
| .                  | Gorai.002G028700.1 | .                  | .                  | . |
| .                  | .                  | .                  | .                  | . |
| Vv05g0037          | Tc04_g028480       | .                  | Gorai.005G061700.1 | . |
| .                  | .                  | .                  | .                  | . |
| Vv05g0038          | Tc04_g028490       | Gorai.006G260900.1 | .                  | . |
| .                  | Vv07g0432          | Tc01_g030870       | .                  | . |
| .                  | .                  | .                  | .                  | . |
| Vv05g0039          | .                  | .                  | .                  | . |
| .                  | .                  | .                  | .                  | . |
| Vv05g0040          | Tc04_g028510       | .                  | Gorai.005G061800.1 | . |
| .                  | .                  | .                  | .                  | . |
| Vv05g0041          | Tc04_g028520       | .                  | .                  | . |
|                    | Vv07g0434          | Tc01_g030890       | .                  | . |
|                    | Gorai.004G142700.1 | .                  | .                  | . |
| Vv05g0042          | .                  | .                  | .                  | . |
| .                  | .                  | .                  | .                  | . |
| .                  | .                  | .                  | .                  | . |

|                    |                    |                    |           |                    |   |   |   |
|--------------------|--------------------|--------------------|-----------|--------------------|---|---|---|
| Vv05g0043          | .                  | .                  | .         | .                  | . | . | . |
| .                  | .                  | .                  | .         | .                  | . | . | . |
| Vv05g0044          | Tc04_g028570       | .                  | .         | Gorai.006G076800.1 | . | . | . |
| .                  | .                  | .                  | .         | .                  | . | . | . |
| Vv05g0045          | Tc04_g028580       | Gorai.006G260500.1 | Gorai.    | .                  | . | . | . |
| 005G061900.1       | Gorai.011G193300.1 | .                  | Vv07g0435 | .                  | . | . | . |
| Tc01_g030910       | .                  | .                  | .         | .                  | . | . | . |
| Vv05g0046          | Tc04_g028590       | Gorai.006G260400.1 | .         | .                  | . | . | . |
| .                  | .                  | .                  | .         | .                  | . | . | . |
| Vv05g0047          | Tc04_g028600       | .                  | Gorai.    | .                  | . | . | . |
| 011G193400.1       | .                  | .                  | .         | .                  | . | . | . |
| Vv05g0048          | .                  | .                  | .         | .                  | . | . | . |
| .                  | .                  | .                  | .         | .                  | . | . | . |
| Vv05g0049          | Tc04_g028610       | Gorai.006G260300.1 | .         | .                  | . | . | . |
| Gorai.011G193600.1 | .                  | .                  | .         | .                  | . | . | . |
| .                  | .                  | .                  | .         | .                  | . | . | . |
| Vv05g0050          | .                  | .                  | .         | .                  | . | . | . |
| .                  | .                  | .                  | .         | .                  | . | . | . |
| Vv05g0051          | .                  | .                  | .         | .                  | . | . | . |
| .                  | .                  | .                  | .         | .                  | . | . | . |
| Vv05g0052          | Tc04_g028630       | Gorai.006G260200.1 | Gorai.    | .                  | . | . | . |
| 005G062000.1       | Gorai.011G193800.1 | .                  | Vv07g0441 | .                  | . | . | . |
| Tc01_g031050       | Gorai.007G126400.1 | .                  | .         | .                  | . | . | . |
| .                  | .                  | .                  | .         | .                  | . | . | . |
| Vv05g0053          | Tc04_g028640       | Gorai.005G062100.1 | .         | .                  | . | . | . |
| Gorai.011G193900.1 | Gorai.002G028800.1 | .                  | .         | .                  | . | . | . |
| .                  | .                  | .                  | .         | .                  | . | . | . |
| Vv05g0054          | Tc04_g028650       | Gorai.005G062200.1 | .         | .                  | . | . | . |
| Gorai.011G194000.1 | .                  | .                  | .         | .                  | . | . | . |
| .                  | .                  | Vv14g0183          | .         | .                  | . | . | . |
| Gorai.007G303500.1 | .                  | .                  | .         | .                  | . | . | . |
| Vv05g0055          | .                  | .                  | .         | .                  | . | . | . |
| .                  | .                  | .                  | .         | .                  | . | . | . |
| Vv05g0056          | Tc04_g028660       | .                  | .         | .                  | . | . | . |
| Gorai.002G028900.1 | .                  | .                  | .         | .                  | . | . | . |
| .                  | .                  | .                  | .         | .                  | . | . | . |
| Vv05g0057          | Tc04_g028670       | Gorai.006G077000.1 | .         | .                  | . | . | . |
| .                  | Gorai.002G029000.1 | .                  | .         | .                  | . | . | . |
| .                  | .                  | .                  | .         | .                  | . | . | . |

|                    |                    |                    |   |                    |   |        |
|--------------------|--------------------|--------------------|---|--------------------|---|--------|
| Vv05g0058          | Tc04_g028690       | .                  | . | Gorai.006G077200.1 | . | .      |
| .                  | .                  | .                  | . | .                  | . | .      |
| Vv05g0059          | Tc04_g028710       | Gorai.006G260100.1 | . | .                  | . | .      |
| Gorai.006G077400.1 | Gorai.011G194200.1 | .                  | . | Vv07g0448          | . | .      |
| .                  | .                  | .                  | . | .                  | . | .      |
| Vv05g0060          | .                  | .                  | . | .                  | . | .      |
| .                  | .                  | .                  | . | .                  | . | .      |
| Vv05g0061          | .                  | .                  | . | .                  | . | .      |
| .                  | .                  | .                  | . | .                  | . | .      |
| Vv05g0062          | .                  | .                  | . | .                  | . | .      |
| .                  | .                  | .                  | . | .                  | . | .      |
| Vv05g0063          | Tc04_g028720       | .                  | . | Gorai.006G077500.1 | . | .      |
| .                  | .                  | .                  | . | .                  | . | .      |
| Vv05g0064          | Tc04_g028730       | .                  | . | Gorai.005G062300.1 | . | .      |
| Gorai.011G194300.1 | .                  | .                  | . | .                  | . | .      |
| .                  | .                  | .                  | . | .                  | . | .      |
| Vv05g0065          | .                  | .                  | . | Gorai.005G062500.1 | . | .      |
| Gorai.011G194900.1 | .                  | .                  | . | .                  | . | .      |
| .                  | .                  | .                  | . | .                  | . | .      |
| Vv05g0066          | Tc04_g028740       | .                  | . | Gorai.005G062600.1 | . | .      |
| Gorai.011G196500.1 | .                  | .                  | . | .                  | . | .      |
| .                  | .                  | .                  | . | .                  | . | .      |
| Vv05g0067          | .                  | .                  | . | .                  | . | .      |
| .                  | .                  | .                  | . | .                  | . | .      |
| Vv05g0068          | .                  | .                  | . | Gorai.005G062700.1 | . | .      |
| Gorai.011G196600.1 | .                  | .                  | . | .                  | . | .      |
| .                  | .                  | .                  | . | .                  | . | .      |
| Vv05g0069          | Tc04_g028750       | .                  | . | Gorai.005G062800.1 | . | .      |
| Gorai.011G196800.1 | .                  | .                  | . | Vv01g0538          | . | .      |
| Tc02_g028590       | Gorai.002G177600.1 | .                  | . | .                  | . | .      |
| .                  | .                  | .                  | . | .                  | . | .      |
| Vv05g0070          | .                  | .                  | . | .                  | . | .      |
| .                  | .                  | .                  | . | .                  | . | .      |
| Vv05g0071          | .                  | .                  | . | Gorai.005G063200.1 | . | .      |
| Gorai.011G196900.1 | .                  | .                  | . | Vv01g0535          | . | Gorai. |
| 002G178000.1       | .                  | .                  | . | .                  | . | .      |
| .                  | .                  | .                  | . | .                  | . | .      |

|                    |              |   |                    |              |   |   |
|--------------------|--------------|---|--------------------|--------------|---|---|
| Vv05g0072          | Tc04_g028760 | . | .                  | .            | . | . |
| .                  | .            | . | .                  | .            | . | . |
| Vv05g0073          | .            | . | .                  | .            | . | . |
| .                  | .            | . | .                  | .            | . | . |
| Vv05g0074          | .            | . | Gorai.005G063300.1 | .            | . | . |
| Gorai.011G197000.1 | .            | . | Vv01g0533          | Tc02_g028610 | . | . |
| .                  | .            | . | .                  | .            | . | . |
| Vv05g0075          | Tc04_g028780 | . | .                  | .            | . | . |
| .                  | .            | . | .                  | .            | . | . |
| Vv05g0076          | .            | . | Gorai.005G063400.1 | .            | . | . |
| Gorai.011G197200.1 | .            | . | Vv01g0531          | .            | . | . |
| Gorai.005G160700.1 | .            | . | .                  | .            | . | . |
| .                  | .            | . | .                  | .            | . | . |
| Vv05g0077          | .            | . | .                  | .            | . | . |
| .                  | .            | . | .                  | .            | . | . |
| Vv05g0078          | Tc04_g028790 | . | Gorai.005G063900.1 | .            | . | . |
| Gorai.011G197300.1 | .            | . | Vv01g0529          | .            | . | . |
| Tc02_g028620       | .            | . | .                  | .            | . | . |
| .                  | .            | . | .                  | .            | . | . |
| Vv05g0079          | .            | . | .                  | .            | . | . |
| .                  | .            | . | .                  | .            | . | . |
| Vv05g0080          | Tc04_g028820 | . | .                  | .            | . | . |
| Vv01g0527          | .            | . | .                  | .            | . | . |
| .                  | .            | . | .                  | .            | . | . |
| Vv05g0081          | .            | . | .                  | .            | . | . |
| .                  | .            | . | .                  | .            | . | . |
| Vv05g0082          | .            | . | .                  | .            | . | . |
| .                  | .            | . | .                  | .            | . | . |
| Vv05g0083          | .            | . | .                  | .            | . | . |
| Vv01g0526          | Tc02_g028660 | . | .                  | .            | . | . |
| .                  | .            | . | .                  | .            | . | . |
| Vv05g0084          | Tc04_g028860 | . | Gorai.005G064100.1 | .            | . | . |
| .                  | .            | . | .                  | .            | . | . |
| Vv05g0085          | Tc04_g028880 | . | Gorai.005G064300.1 | .            | . | . |
| .                  | .            | . | .                  | .            | . | . |
| Vv05g0086          | .            | . | .                  | .            | . | . |
| .                  | .            | . | .                  | .            | . | . |
| Vv05g0087          | .            | . | Gorai.005G064500.1 | .            | . | . |
| Gorai.011G197400.1 | .            | . | Vv01g0525          | Tc02_g027000 | . | . |

|                    |                    |                    |                    |   |           |   |
|--------------------|--------------------|--------------------|--------------------|---|-----------|---|
|                    | Gorai.005G160800.1 | .                  | .                  | . | .         | . |
| Vv05g0088          | .                  | .                  | .                  | . | .         | . |
| Vv05g0089          | Tc04_g028900       | .                  | Gorai.005G064700.1 | . | .         | . |
|                    | Gorai.011G197500.1 | .                  | Vv01g0524          | . | .         | . |
| Vv05g0090          | Tc04_g028940       | .                  | Gorai.005G064800.1 | . | .         | . |
|                    | Gorai.011G197600.1 | .                  | .                  | . | .         | . |
| Vv05g0091          | Tc04_g028960       | Gorai.006G259900.1 | .                  | . | .         | . |
| Gorai.006G077900.1 | .                  | .                  | Vv07g0454          | . | .         | . |
| Tc01_g031140       | Gorai.007G126100.1 | Gorai.008G053400.1 | .                  | . | .         | . |
|                    | Gorai.004G143000.1 | .                  | .                  | . | .         | . |
| Vv05g0092          | Tc04_g028970       | Gorai.006G259800.1 | Gorai.             | . | .         | . |
| 005G065100.1       | .                  | .                  | Vv07g0456          | . | .         | . |
| Tc01_g031160       | Gorai.007G126000.1 | .                  | .                  | . | .         | . |
| Gorai.004G237800.1 | Vv14g0179          | Tc04_g028970       | .                  | . | .         | . |
| Vv05g0093          | Tc04_g028990       | Gorai.006G259700.1 | .                  | . | .         | . |
|                    | Gorai.002G029200.1 | .                  | .                  | . | .         | . |
| Vv05g0094          | Tc04_g029000       | Gorai.005G065200.1 | .                  | . | .         | . |
|                    | Vv07g0459          | Tc01_g031190       | Gorai.             | . | .         | . |
| 007G125700.1       | .                  | Gorai.004G063600.1 | .                  | . | .         | . |
| Vv05g0095          | .                  | .                  | .                  | . | .         | . |
| Vv05g0096          | Tc04_g029020       | Gorai.005G065300.1 | .                  | . | .         | . |
|                    | Gorai.002G029400.1 | Vv07g0465          | .                  | . | .         | . |
| Tc01_g031290       | .                  | .                  | .                  | . | Vv14g0172 | . |
|                    | Tc04_g029020       | .                  | .                  | . | .         | . |
| Vv05g0097          | Tc04_g029030       | Gorai.005G065400.1 | .                  | . | .         | . |
|                    | Gorai.002G029800.1 | .                  | .                  | . | .         | . |
| Gorai.013G128000.1 | .                  | Vv14g0171          | Tc04_g029030       | . | .         | . |
| Vv05g0098          | Tc04_g029040       | Gorai.007G124900.1 | .                  | . | .         | . |
| Vv05g0099          | .                  | .                  | .                  | . | .         | . |
| Vv07g0471          | .                  | .                  | .                  | . | .         | . |
| Vv05g0100          | Tc04_g029070       | Gorai.006G078000.1 | .                  | . | .         | . |

|                    |                    |                    |        |        |   |
|--------------------|--------------------|--------------------|--------|--------|---|
| Vv05g0101          | Tc04_g029090       | .                  | .      | .      | . |
| Vv14g0159          | Tc04_g029090       | Gorai.013G128700.1 | .      | .      | . |
| Vv05g0102          | .                  | Gorai.006G078400.1 | .      | .      | . |
| Vv05g0103          | Tc04_g029110       | .                  | .      | .      | . |
| Vv05g0104          | Tc04_g029120       | Gorai.006G078500.1 | .      | .      | . |
| Vv05g0105          | Tc04_g029130       | .                  | .      | .      | . |
| Vv05g0106          | Tc04_g029140       | Gorai.006G078600.1 | .      | .      | . |
| Vv05g0107          | .                  | Gorai.006G078700.1 | .      | .      | . |
| Vv05g0108          | Tc04_g029150       | .                  | .      | Gorai. | . |
| 011G198100.1       | .                  | .                  | .      | .      | . |
| Vv05g0109          | Tc04_g029160       | Gorai.006G259500.1 | .      | .      | . |
| Gorai.011G198200.1 | .                  | Vv07g0492          | .      | .      | . |
| Tc01_g031530       | Gorai.008G140600.1 | .                  | .      | .      | . |
| Vv05g0110          | .                  | Gorai.005G065500.1 | Gorai. | .      | . |
| 006G078800.1       | .                  | .                  | .      | .      | . |
| Vv05g0111          | .                  | .                  | .      | .      | . |
| Vv05g0112          | Tc04_g029170       | Gorai.005G065600.1 | .      | .      | . |
| Gorai.011G198400.1 | .                  | .                  | .      | .      | . |
| Vv05g0113          | Tc04_g029180       | Gorai.006G078900.1 | .      | .      | . |
| Gorai.011G198500.1 | .                  | .                  | .      | .      | . |
| Vv05g0114          | .                  | .                  | .      | .      | . |
| Vv05g0115          | Tc04_g029190       | Gorai.005G065700.1 | .      | .      | . |
| Gorai.006G079000.1 | Gorai.011G198600.1 | .                  | .      | .      | . |



|                    |                    |                    |                    |                    |   |   |   |
|--------------------|--------------------|--------------------|--------------------|--------------------|---|---|---|
| .                  | .                  | .                  | .                  | .                  | . | . | . |
| Vv05g0116          | Tc04_g029210       | .                  | Gorai.005G065800.1 | .                  | . | . | . |
|                    | Gorai.011G198700.1 | .                  | .                  | .                  | . | . | . |
| .                  | .                  | .                  | Vv14g0148          | Tc04_g029200       | . | . | . |
| Gorai.013G129100.1 | .                  | .                  | .                  | .                  | . | . | . |
| Vv05g0117          | Tc04_g029220       | Gorai.006G259400.1 | Gorai.             | .                  | . | . | . |
| 005G066000.1       | .                  | Gorai.011G198800.1 | .                  | Vv07g0496          | . | . | . |
|                    | Tc01_g031570       | .                  | .                  | .                  | . | . | . |
| .                  | .                  | .                  | .                  | .                  | . | . | . |
| Vv05g0118          | .                  | .                  | .                  | .                  | . | . | . |
| .                  | .                  | .                  | .                  | .                  | . | . | . |
| .                  | .                  | .                  | .                  | .                  | . | . | . |
| Vv05g0119          | Tc04_g029230       | Gorai.006G259300.1 | .                  | .                  | . | . | . |
| Gorai.006G079100.1 | .                  | .                  | .                  | .                  | . | . | . |
| .                  | .                  | Vv14g0147          | Tc04_g029230       | .                  | . | . | . |
| .                  | .                  | .                  | .                  | .                  | . | . | . |
| Vv05g0120          | Tc04_g029240       | Gorai.006G259200.1 | Gorai.             | .                  | . | . | . |
| 005G066100.1       | .                  | Gorai.011G199200.1 | .                  | .                  | . | . | . |
| .                  | .                  | .                  | .                  | .                  | . | . | . |
| .                  | .                  | .                  | .                  | .                  | . | . | . |
| Vv05g0121          | Tc04_g029250       | Gorai.006G259100.1 | .                  | .                  | . | . | . |
|                    | Gorai.011G199300.1 | .                  | .                  | .                  | . | . | . |
| .                  | .                  | .                  | .                  | .                  | . | . | . |
| .                  | .                  | .                  | .                  | .                  | . | . | . |
| Vv05g0122          | .                  | .                  | Gorai.006G079200.1 | .                  | . | . | . |
| Gorai.011G199400.1 | .                  | .                  | .                  | .                  | . | . | . |
| .                  | .                  | .                  | .                  | .                  | . | . | . |
| .                  | .                  | .                  | .                  | .                  | . | . | . |
| Vv05g0123          | Tc04_g029280       | .                  | .                  | .                  | . | . | . |
| Gorai.002G030000.1 | .                  | .                  | .                  | .                  | . | . | . |
| .                  | .                  | .                  | .                  | .                  | . | . | . |
| Vv05g0124          | Tc04_g029290       | .                  | .                  | Gorai.006G079300.1 | . | . | . |
| .                  | .                  | .                  | .                  | .                  | . | . | . |
| .                  | .                  | .                  | .                  | .                  | . | . | . |
| Vv05g0125          | Tc04_g029300       | .                  | .                  | Gorai.006G079400.1 | . | . | . |
| .                  | .                  | .                  | .                  | .                  | . | . | . |
| .                  | .                  | .                  | .                  | .                  | . | . | . |
| Vv05g0126          | Tc04_g029350       | .                  | .                  | Gorai.006G079800.1 | . | . | . |
| .                  | Vv07g0509          | Tc01_g031670       | Gorai.             | .                  | . | . | . |
| 007G122800.1       | Gorai.008G139700.1 | .                  | Gorai.004G050400.1 | .                  | . | . | . |
| .                  | Vv14g0131          | Tc04_g029350       | .                  | .                  | . | . | . |
| Gorai.007G122800.1 | .                  | .                  | .                  | .                  | . | . | . |
| Vv05g0127          | Tc04_g029360       | Gorai.006G258900.1 | .                  | .                  | . | . | . |
| .                  | .                  | .                  | .                  | .                  | . | . | . |
| .                  | .                  | .                  | .                  | .                  | . | . | . |
| Vv05g0128          | Tc04_g029390       | Gorai.006G258800.1 | Gorai.             | .                  | . | . | . |
| 005G066300.1       | .                  | Vv07g0514          | .                  | .                  | . | . | . |
| Tc01_g031760       | .                  | Gorai.008G139000.1 | .                  | .                  | . | . | . |
| .                  | .                  | .                  | .                  | .                  | . | . | . |

|                    |                    |                    |                    |        |
|--------------------|--------------------|--------------------|--------------------|--------|
| Vv05g0129          | Tc04_g029400       | Gorai.006G258700.1 | .                  | .      |
|                    | Gorai.011G199600.1 | .                  | Vv07g0515          | .      |
| .                  | .                  | .                  | .                  | .      |
| .                  | .                  | .                  | .                  | .      |
| Vv05g0130          | .                  | .                  | .                  | .      |
| .                  | .                  | .                  | .                  | .      |
| .                  | .                  | .                  | .                  | .      |
| Vv05g0131          | Tc04_g029410       | .                  | Gorai.005G066400.1 | .      |
| .                  | .                  | Vv07g0522          | Tc01_g031800       | .      |
| .                  | .                  | Vv14g0122          | Tc04_g029410       | .      |
|                    | Gorai.007G306800.1 | .                  | .                  | .      |
| Vv05g0132          | Tc04_g029430       | .                  | Gorai.005G066600.1 | .      |
| Gorai.006G079900.1 | .                  | .                  | .                  | .      |
| .                  | .                  | .                  | .                  | .      |
| .                  | .                  | .                  | .                  | .      |
| Vv05g0133          | .                  | .                  | .                  | .      |
| .                  | .                  | .                  | .                  | .      |
| .                  | .                  | .                  | .                  | .      |
| Vv05g0134          | Tc04_g029450       | .                  | Gorai.005G066700.1 | .      |
| .                  | .                  | .                  | .                  | .      |
| .                  | .                  | .                  | .                  | .      |
| Vv05g0135          | Tc04_g029460       | Gorai.006G258500.1 | .                  | .      |
| .                  | .                  | .                  | .                  | .      |
| .                  | .                  | .                  | .                  | .      |
| Vv05g0136          | Tc04_g029470       | .                  | Gorai.005G066800.1 | .      |
| .                  | .                  | .                  | .                  | .      |
| .                  | .                  | .                  | .                  | .      |
| Vv05g0137          | .                  | .                  | .                  | .      |
| .                  | .                  | .                  | .                  | .      |
| .                  | .                  | .                  | .                  | .      |
| Vv05g0138          | Tc04_g029490       | .                  | Gorai.005G066900.1 | .      |
|                    | Gorai.011G199700.1 | .                  | .                  | .      |
| .                  | .                  | .                  | .                  | .      |
| .                  | .                  | .                  | .                  | .      |
| Vv05g0139          | Tc04_g029500       | .                  | .                  | Gorai. |
| 011G199800.1       | .                  | .                  | .                  | .      |
| .                  | .                  | .                  | .                  | .      |
| Vv05g0140          | .                  | .                  | .                  | .      |
| .                  | .                  | .                  | .                  | .      |
| .                  | .                  | .                  | .                  | .      |
| Vv05g0141          | Tc04_g029540       | .                  | Gorai.005G067100.1 | .      |
| .                  | .                  | .                  | .                  | .      |
| .                  | .                  | .                  | .                  | .      |
| Vv05g0142          | Tc04_g029550       | .                  | .                  | .      |
| Gorai.002G030100.1 | .                  | .                  | .                  | .      |
| .                  | .                  | .                  | .                  | .      |
| Vv05g0143          | Tc04_g029570       | .                  | .                  | Gorai. |
| 011G200100.1       | Gorai.002G030200.1 | .                  | .                  | .      |
| .                  | .                  | .                  | .                  | .      |
| .                  | .                  | .                  | .                  | .      |

|                                 |                                    |                    |                    |                    |        |
|---------------------------------|------------------------------------|--------------------|--------------------|--------------------|--------|
| Vv05g0144<br>011G200200.1       | Tc04_g029580                       | .                  | .                  | .                  | Gorai. |
| .                               | .                                  | .                  | .                  | .                  | .      |
| Vv05g0145                       | .                                  | .                  | .                  | .                  | .      |
| .                               | .                                  | .                  | .                  | .                  | .      |
| Vv05g0146<br>005G067400.1       | Tc04_g029590<br>Gorai.006G080100.1 | Gorai.006G258400.1 | .                  | Gorai.011G200300.1 | Gorai. |
| .                               | .                                  | .                  | .                  | .                  | .      |
| Vv05g0147                       | Tc04_g029600<br>Gorai.002G030300.1 | .                  | Gorai.005G067500.1 | .                  | .      |
| .                               | .                                  | .                  | .                  | .                  | .      |
| Vv05g0148<br>Gorai.002G030400.1 | Tc04_g029610                       | .                  | .                  | .                  | .      |
| .                               | Vv14g0115<br>Gorai.002G030400.1    | Tc04_g029610       | .                  | .                  | .      |
| Vv05g0149                       | .                                  | .                  | .                  | .                  | .      |
| .                               | .                                  | .                  | .                  | .                  | .      |
| Vv05g0150<br>011G200600.1       | Tc04_g029620                       | .                  | .                  | .                  | Gorai. |
| .                               | .                                  | .                  | .                  | .                  | .      |
| Vv05g0151<br>Gorai.011G200700.1 | Tc04_g029640                       | Gorai.006G258100.1 | .                  | .                  | .      |
| .                               | .                                  | .                  | .                  | .                  | .      |
| Vv05g0152<br>Gorai.002G030500.1 | Tc04_g029650                       | .                  | .                  | .                  | .      |
| .                               | .                                  | .                  | .                  | .                  | .      |
| Vv05g0153                       | Tc04_g029660                       | Gorai.006G258000.1 | .                  | .                  | .      |
| .                               | .                                  | .                  | .                  | .                  | .      |
| Vv05g0154<br>Vv07g0533          | Tc01_g031940                       | .                  | Gorai.008G138000.1 | .                  | .      |
| .                               | .                                  | .                  | .                  | .                  | .      |
| Vv05g0155<br>005G067600.1       | Tc04_g029680<br>Gorai.011G200800.1 | Gorai.006G263300.1 | .                  | Gorai.             | .      |
| .                               | .                                  | .                  | .                  | .                  | .      |
| Vv05g0156<br>011G200900.1       | Tc04_g029690                       | .                  | .                  | .                  | Gorai. |
| .                               | .                                  | .                  | .                  | .                  | .      |
| Vv05g0157                       | .                                  | .                  | .                  | .                  | .      |
| .                               | .                                  | .                  | .                  | .                  | .      |
| Vv05g0158<br>Gorai.011G201000.1 | Tc04_g029700                       | Gorai.006G257800.1 | .                  | .                  | .      |
| .                               | .                                  | .                  | .                  | .                  | .      |

|                    |                    |                    |   |   |   |                    |   |
|--------------------|--------------------|--------------------|---|---|---|--------------------|---|
| .                  | .                  | .                  | . | . | . | .                  | . |
| .                  | .                  | .                  | . | . | . | .                  | . |
| Vv05g0159          | Tc04_g029710       | .                  | . | . | . | Gorai.             | . |
| 011G201500.1       | .                  | .                  | . | . | . | .                  | . |
| .                  | .                  | .                  | . | . | . | .                  | . |
| Vv05g0160          | .                  | .                  | . | . | . | .                  | . |
| .                  | .                  | .                  | . | . | . | .                  | . |
| Vv05g0161          | .                  | .                  | . | . | . | .                  | . |
| .                  | .                  | .                  | . | . | . | .                  | . |
| Vv05g0162          | .                  | .                  | . | . | . | .                  | . |
| .                  | .                  | .                  | . | . | . | .                  | . |
| Vv05g0163          | Tc04_g029780       | Gorai.006G265000.1 | . | . | . | Gorai.             | . |
| 005G067900.1       | .                  | Gorai.011G201700.1 | . | . | . | Gorai.002G030700.1 | . |
| .                  | .                  | .                  | . | . | . | .                  | . |
| Vv14g0112          | Tc04_g029780       | .                  | . | . | . | .                  | . |
| Vv05g0164          | Tc04_g029790       | .                  | . | . | . | .                  | . |
| Gorai.002G030800.1 | .                  | .                  | . | . | . | .                  | . |
| .                  | .                  | .                  | . | . | . | .                  | . |
| Vv05g0165          | Tc04_g029800       | Gorai.006G265200.1 | . | . | . | Gorai.             | . |
| 005G068100.1       | .                  | Gorai.011G201800.1 | . | . | . | Vv07g0536          | . |
| .                  | Tc01_g031960       | Gorai.007G121200.1 | . | . | . | Gorai.008G137900.1 | . |
| .                  | Gorai.004G069500.1 | .                  | . | . | . | Gorai.004G144900.1 | . |
| .                  | .                  | .                  | . | . | . | .                  | . |
| Vv05g0166          | Tc04_g029820       | .                  | . | . | . | Gorai.005G068200.1 | . |
| .                  | .                  | .                  | . | . | . | .                  | . |
| .                  | .                  | .                  | . | . | . | .                  | . |
| Vv05g0167          | .                  | .                  | . | . | . | .                  | . |
| .                  | .                  | .                  | . | . | . | .                  | . |
| .                  | .                  | .                  | . | . | . | .                  | . |
| Vv05g0168          | Tc04_g029830       | .                  | . | . | . | Gorai.             | . |
| 011G201900.1       | .                  | .                  | . | . | . | .                  | . |
| .                  | .                  | .                  | . | . | . | .                  | . |
| Vv05g0169          | .                  | .                  | . | . | . | .                  | . |
| .                  | .                  | .                  | . | . | . | .                  | . |
| .                  | .                  | .                  | . | . | . | .                  | . |
| Vv05g0170          | Tc04_g029850       | Gorai.006G265300.1 | . | . | . | .                  | . |
| .                  | Gorai.002G030900.1 | .                  | . | . | . | .                  | . |
| .                  | .                  | .                  | . | . | . | .                  | . |
| .                  | .                  | .                  | . | . | . | .                  | . |
| Vv05g0171          | Tc04_g029860       | Gorai.006G265400.1 | . | . | . | .                  | . |
| Gorai.006G080200.1 | .                  | Gorai.011G202000.1 | . | . | . | Gorai.002G031000.1 | . |
| .                  | Vv07g0540          | Tc01_g032010       | . | . | . | .                  | . |
| .                  | Vv14g0111          | Tc04_g029860       | . | . | . | .                  | . |
| Gorai.011G202000.1 | .                  | .                  | . | . | . | .                  | . |
| Vv05g0172          | Tc04_g029890       | .                  | . | . | . | Gorai.             | . |
| 011G202200.1       | Gorai.002G031100.1 | .                  | . | . | . | .                  | . |
| .                  | .                  | .                  | . | . | . | .                  | . |

|                    |                    |                    |   |                    |   |   |   |
|--------------------|--------------------|--------------------|---|--------------------|---|---|---|
| Vv05g0173          | .                  | .                  | . | .                  | . | . | . |
| .                  | .                  | .                  | . | .                  | . | . | . |
| Vv05g0174          | Tc04_g029910       | .                  | . | Gorai.005G068400.1 | . | . | . |
| .                  | .                  | .                  | . | .                  | . | . | . |
| Vv05g0175          | Tc04_g029920       | .                  | . | Gorai.006G080300.1 | . | . | . |
| .                  | .                  | .                  | . | .                  | . | . | . |
| Vv05g0176          | .                  | .                  | . | .                  | . | . | . |
| .                  | .                  | .                  | . | .                  | . | . | . |
| Vv05g0177          | Tc04_g029950       | .                  | . | Gorai.006G080500.1 | . | . | . |
| Gorai.011G202400.1 | .                  | .                  | . | .                  | . | . | . |
| .                  | .                  | .                  | . | .                  | . | . | . |
| Vv05g0178          | .                  | .                  | . | .                  | . | . | . |
| .                  | .                  | .                  | . | .                  | . | . | . |
| Vv05g0179          | Tc04_g029980       | Gorai.006G265500.1 | . | .                  | . | . | . |
| .                  | .                  | .                  | . | .                  | . | . | . |
| Vv05g0180          | .                  | .                  | . | .                  | . | . | . |
| .                  | .                  | .                  | . | .                  | . | . | . |
| Vv05g0181          | Tc04_g029990       | .                  | . | Gorai.             | . | . | . |
| 011G202600.1       | .                  | .                  | . | .                  | . | . | . |
| .                  | .                  | .                  | . | .                  | . | . | . |
| Vv05g0182          | .                  | .                  | . | Gorai.011G202700.1 | . | . | . |
| .                  | .                  | .                  | . | .                  | . | . | . |
| Vv05g0183          | Tc04_g030000       | .                  | . | Gorai.             | . | . | . |
| 011G202800.1       | Gorai.002G031500.1 | .                  | . | .                  | . | . | . |
| .                  | .                  | .                  | . | .                  | . | . | . |
| Vv05g0184          | Tc04_g030030       | .                  | . | Gorai.006G080600.1 | . | . | . |
| .                  | .                  | .                  | . | .                  | . | . | . |
| Vv05g0185          | Tc04_g030040       | .                  | . | Gorai.006G080700.1 | . | . | . |
| .                  | .                  | .                  | . | .                  | . | . | . |
| Vv05g0186          | .                  | .                  | . | .                  | . | . | . |
| .                  | .                  | .                  | . | .                  | . | . | . |
| Vv05g0187          | Tc04_g030060       | .                  | . | .                  | . | . | . |
| .                  | .                  | .                  | . | .                  | . | . | . |
| Vv05g0188          | Tc04_g030070       | .                  | . | Gorai.             | . | . | . |
| 011G203600.1       | .                  | .                  | . | .                  | . | . | . |

|                    |                    |                    |                    |
|--------------------|--------------------|--------------------|--------------------|
| .                  | Vv14g0099          | Tc04_g030070       | Gorai.013G130600.1 |
| Gorai.007G308100.1 | .                  | Gorai.013G208200.1 | .                  |
| Vv05g0189          | Tc04_g030080       | Gorai.005G068900.1 | .                  |
| Gorai.011G203900.1 | .                  | .                  | .                  |
| .                  | .                  | .                  | .                  |
| Vv05g0190          | Tc04_g030090       | .                  | Gorai.             |
| 011G204200.1       | .                  | .                  | .                  |
| .                  | .                  | .                  | .                  |
| Vv05g0191          | .                  | Gorai.005G069100.1 | .                  |
| .                  | .                  | .                  | .                  |
| .                  | .                  | .                  | .                  |
| Vv05g0192          | Tc04_g030110       | Gorai.005G069200.1 | .                  |
| .                  | .                  | .                  | .                  |
| .                  | .                  | .                  | .                  |
| Vv05g0193          | Tc04_g030120       | Gorai.006G265600.1 | .                  |
| .                  | Vv07g0563          | Gorai.007G120900.1 | .                  |
| .                  | .                  | Vv14g0094          | .                  |
| .                  | .                  | .                  | .                  |
| Vv05g0194          | .                  | .                  | .                  |
| .                  | .                  | .                  | .                  |
| .                  | .                  | .                  | .                  |
| Vv05g0195          | Tc04_g030130       | .                  | .                  |
| .                  | .                  | .                  | .                  |
| .                  | .                  | .                  | .                  |
| Vv05g0196          | .                  | .                  | .                  |
| .                  | .                  | .                  | .                  |
| .                  | .                  | .                  | .                  |
| Vv05g0197          | .                  | .                  | .                  |
| .                  | .                  | .                  | .                  |
| .                  | .                  | .                  | .                  |
| Vv05g0198          | .                  | .                  | .                  |
| .                  | .                  | .                  | .                  |
| .                  | .                  | .                  | .                  |
| Vv05g0199          | .                  | .                  | .                  |
| .                  | .                  | .                  | .                  |
| .                  | .                  | .                  | .                  |
| Vv05g0200          | .                  | .                  | .                  |
| .                  | .                  | .                  | .                  |
| .                  | .                  | .                  | .                  |
| Vv05g0201          | .                  | .                  | .                  |
| .                  | .                  | .                  | .                  |
| .                  | .                  | .                  | .                  |
| Vv05g0202          | .                  | .                  | .                  |
| .                  | .                  | .                  | .                  |
| .                  | .                  | .                  | .                  |
| Vv05g0203          | Gorai.006G257900.1 | .                  | .                  |
| .                  | .                  | .                  | .                  |
| .                  | .                  | .                  | .                  |
| Vv05g0204          | .                  | .                  | .                  |

|           |   |   |   |   |   |   |   |
|-----------|---|---|---|---|---|---|---|
| .         | . | . | . | . | . | . | . |
| Vv05g0205 | . | . | . | . | . | . | . |
| .         | . | . | . | . | . | . | . |
| Vv05g0206 | . | . | . | . | . | . | . |
| .         | . | . | . | . | . | . | . |
| Vv05g0207 | . | . | . | . | . | . | . |
| .         | . | . | . | . | . | . | . |
| Vv05g0208 | . | . | . | . | . | . | . |
| .         | . | . | . | . | . | . | . |
| Vv05g0209 | . | . | . | . | . | . | . |
| .         | . | . | . | . | . | . | . |
| Vv05g0210 | . | . | . | . | . | . | . |
| .         | . | . | . | . | . | . | . |
| Vv05g0211 | . | . | . | . | . | . | . |
| .         | . | . | . | . | . | . | . |
| Vv05g0212 | . | . | . | . | . | . | . |
| .         | . | . | . | . | . | . | . |
| Vv05g0213 | . | . | . | . | . | . | . |
| .         | . | . | . | . | . | . | . |
| Vv05g0214 | . | . | . | . | . | . | . |
| .         | . | . | . | . | . | . | . |
| Vv05g0215 | . | . | . | . | . | . | . |
| .         | . | . | . | . | . | . | . |
| Vv05g0216 | . | . | . | . | . | . | . |
| .         | . | . | . | . | . | . | . |
| Vv05g0217 | . | . | . | . | . | . | . |
| .         | . | . | . | . | . | . | . |
| Vv05g0218 | . | . | . | . | . | . | . |
| .         | . | . | . | . | . | . | . |
| Vv05g0219 | . | . | . | . | . | . | . |
| .         | . | . | . | . | . | . | . |
| Vv05g0220 | . | . | . | . | . | . | . |
| .         | . | . | . | . | . | . | . |
| .         | . | . | . | . | . | . | . |

|              |                    |                    |                    |   |   |   |   |
|--------------|--------------------|--------------------|--------------------|---|---|---|---|
| Vv05g0221    | .                  | .                  | .                  | . | . | . | . |
| .            | .                  | .                  | .                  | . | . | . | . |
| Vv05g0222    | .                  | .                  | .                  | . | . | . | . |
| .            | .                  | .                  | .                  | . | . | . | . |
| Vv05g0223    | .                  | .                  | .                  | . | . | . | . |
| .            | .                  | .                  | .                  | . | . | . | . |
| Vv05g0224    | .                  | .                  | .                  | . | . | . | . |
| .            | .                  | .                  | .                  | . | . | . | . |
| Vv05g0225    | .                  | .                  | .                  | . | . | . | . |
| .            | .                  | .                  | .                  | . | . | . | . |
| Vv05g0226    | .                  | .                  | .                  | . | . | . | . |
| .            | .                  | .                  | .                  | . | . | . | . |
| Vv05g0227    | .                  | Gorai.006G265700.1 | .                  | . | . | . | . |
| .            | .                  | .                  | .                  | . | . | . | . |
| Vv05g0228    | .                  | .                  | .                  | . | . | . | . |
| Vv07g0565    | Tc01_g032360       | .                  | .                  | . | . | . | . |
|              | Vv14g0082          | Tc04_g030130       | Gorai.013G130900.1 | . | . | . | . |
|              | Gorai.007G120900.1 | .                  | .                  | . | . | . | . |
| Vv05g0229    | .                  | .                  | .                  | . | . | . | . |
| .            | .                  | .                  | .                  | . | . | . | . |
| Vv05g0230    | Tc04_g030140       | .                  | Gorai.005G069300.1 | . | . | . | . |
| .            | .                  | .                  | .                  | . | . | . | . |
| Vv05g0231    | Tc04_g030150       | Gorai.006G259300.1 | Gorai.             | . | . | . | . |
| 005G069400.1 | .                  | .                  | .                  | . | . | . | . |
| .            | .                  | .                  | .                  | . | . | . | . |
| Vv05g0232    | .                  | .                  | .                  | . | . | . | . |
| .            | .                  | .                  | .                  | . | . | . | . |
| Vv05g0233    | Tc04_g030170       | .                  | Gorai.005G069600.1 | . | . | . | . |
| .            | .                  | .                  | .                  | . | . | . | . |
| Vv05g0234    | Tc04_g030190       | .                  | Gorai.005G069700.1 | . | . | . | . |
|              | Gorai.011G204400.1 | .                  | .                  | . | . | . | . |
| .            | .                  | .                  | .                  | . | . | . | . |
| Vv05g0235    | .                  | .                  | .                  | . | . | . | . |
| .            | .                  | .                  | .                  | . | . | . | . |
| Vv05g0236    | .                  | .                  | .                  | . | . | . | . |
| .            | .                  | .                  | .                  | . | . | . | . |



|              |                    |                    |           |
|--------------|--------------------|--------------------|-----------|
| Vv05g0237    | Tc04_g030230       | Gorai.006G266100.1 | Gorai.    |
| 005G069900.1 | .                  | Vv07g0520          | .         |
| .            | Gorai.004G066400.1 | .                  | Vv14g0072 |
| Tc04_g030230 | .                  | .                  | .         |
| Vv05g0238    | Tc04_g030240       | Gorai.005G070100.1 | .         |
| .            | .                  | .                  | .         |
| Vv05g0239    | Tc04_g030250       | Gorai.006G266200.1 | Gorai.    |
| 005G070200.1 | .                  | .                  | .         |
| .            | .                  | .                  | .         |
| Vv05g0240    | Tc04_g030260       | Gorai.005G070400.1 | .         |
| .            | .                  | .                  | .         |
| Vv05g0241    | .                  | .                  | .         |
| .            | .                  | .                  | .         |
| Vv05g0242    | Tc04_g030270       | Gorai.005G070500.1 | .         |
| .            | .                  | .                  | .         |
| Vv05g0243    | Tc04_g030280       | Gorai.005G070600.1 | .         |
| .            | .                  | .                  | .         |
| Vv05g0244    | .                  | .                  | .         |
| .            | .                  | .                  | .         |
| Vv05g0245    | .                  | .                  | .         |
| .            | .                  | .                  | .         |
| Vv05g0246    | .                  | .                  | .         |
| .            | .                  | .                  | .         |
| Vv05g0247    | Gorai.006G259500.1 | .                  | .         |
| .            | .                  | .                  | .         |
| Vv05g0248    | .                  | .                  | .         |
| .            | .                  | .                  | .         |
| Vv05g0249    | .                  | .                  | .         |
| .            | .                  | .                  | .         |
| Vv05g0250    | .                  | .                  | .         |
| .            | .                  | .                  | .         |
| Vv05g0251    | .                  | .                  | .         |
| Vv07g0492    | Tc01_g031530       | Gorai.008G140600.1 | .         |
| .            | .                  | .                  | .         |
| Vv05g0252    | Gorai.006G266400.1 | .                  | .         |

|                    |              |  |  |                    |        |  |
|--------------------|--------------|--|--|--------------------|--------|--|
| Vv05g0253          |              |  |  |                    |        |  |
| Vv05g0254          |              |  |  |                    |        |  |
| Vv05g0255          |              |  |  |                    |        |  |
| Vv05g0256          |              |  |  |                    |        |  |
| Vv05g0257          | Tc04_g030330 |  |  | Gorai.005G070900.1 |        |  |
| Vv05g0258          |              |  |  | Gorai.011G204600.1 |        |  |
| Vv05g0259          | Tc04_g030340 |  |  |                    |        |  |
| Vv05g0260          | Tc04_g030350 |  |  | Gorai.006G266300.1 |        |  |
| Vv05g0261          | Tc04_g030360 |  |  |                    |        |  |
| Vv07g0452          | Tc01_g031120 |  |  |                    |        |  |
| Vv05g0262          | Tc04_g030370 |  |  |                    | Gorai. |  |
| 011G204700.1       |              |  |  |                    |        |  |
| Vv05g0263          | Tc04_g030380 |  |  | Gorai.005G071000.1 |        |  |
| Vv05g0264          |              |  |  |                    |        |  |
| Vv05g0265          |              |  |  |                    |        |  |
| Vv05g0266          | Tc04_g030460 |  |  | Gorai.005G071300.1 |        |  |
| Gorai.007G119200.1 | Vv14g0055    |  |  | Tc04_g030460       |        |  |
| Vv05g0267          | Tc04_g030470 |  |  |                    | Gorai. |  |
| 011G204900.1       |              |  |  |                    |        |  |
| Vv05g0268          | Tc04_g030480 |  |  |                    | Gorai. |  |
| 011G205000.1       |              |  |  |                    |        |  |

|                           |                    |              |   |                    |        |
|---------------------------|--------------------|--------------|---|--------------------|--------|
| Vv05g0269<br>011G205100.1 | Tc04_g030490       | .            | . | .                  | Gorai. |
| Vv05g0270                 | Tc04_g030500       | .            | . | Gorai.005G071400.1 | .      |
| Vv05g0271                 | Tc04_g030510       | .            | . | Gorai.005G071500.1 | .      |
| Vv05g0272                 | Tc04_g030520       | .            | . | Gorai.005G071600.1 | .      |
| Vv05g0273                 | Tc04_g030540       | .            | . | .                  | .      |
| Vv05g0274                 | Tc04_g030550       | .            | . | Gorai.005G071800.1 | .      |
| Vv05g0275<br>011G205200.1 | Tc04_g030560       | .            | . | Gorai.             | .      |
| .                         | Vv14g0047          | Tc04_g030560 | . | .                  | .      |
| .                         | Gorai.002G032100.1 | .            | . | .                  | .      |
| Vv05g0276                 | Tc04_g030570       | .            | . | Gorai.005G071900.1 | .      |
| Vv05g0277                 | Tc04_g030580       | .            | . | .                  | .      |
| Vv05g0278                 | Tc04_g030600       | .            | . | .                  | .      |
| Vv14g0044                 | Tc04_g030600       | .            | . | .                  | .      |
| Vv05g0279                 | Tc04_g030620       | .            | . | Gorai.005G072600.1 | .      |
| Vv05g0280<br>011G205600.1 | Tc04_g030630       | .            | . | Gorai.             | .      |
| .                         | Vv07g0437          | Tc01_g030930 | . | .                  | .      |
| .                         | Gorai.004G051900.1 | .            | . | .                  | .      |
| Vv05g0281                 | Tc04_g030640       | .            | . | .                  | .      |
| Vv05g0282                 | .                  | .            | . | .                  | .      |
| Vv05g0283                 | Tc04_g030660       | .            | . | Gorai.005G073000.1 | .      |
| Vv05g0284                 | Tc04_g030670       | .            | . | .                  | .      |

|           |                    |                    |                    |           |
|-----------|--------------------|--------------------|--------------------|-----------|
| Vv05g0285 | Tc04_g030700       | .                  | Gorai.005G073300.1 | .         |
| .         | .                  | .                  | .                  | .         |
| Vv05g0286 | .                  | .                  | .                  | .         |
| .         | .                  | .                  | .                  | .         |
| Vv05g0287 | .                  | .                  | .                  | .         |
| .         | .                  | .                  | .                  | .         |
| Vv05g0288 | .                  | .                  | .                  | .         |
| .         | .                  | .                  | .                  | .         |
| Vv05g0289 | Tc04_g030720       | .                  | Gorai.005G073400.1 | .         |
| .         | .                  | .                  | .                  | .         |
| Vv05g0290 | .                  | .                  | .                  | .         |
| .         | .                  | .                  | .                  | .         |
| Vv05g0291 | Gorai.006G264900.1 | .                  | .                  | .         |
| .         | .                  | .                  | .                  | .         |
| Vv05g0292 | Tc04_g030740       | .                  | Gorai.005G073900.1 | .         |
| .         | Vv14g0040          | .                  | .                  | .         |
| .         | .                  | .                  | .                  | .         |
| Vv05g0293 | .                  | .                  | .                  | .         |
| .         | .                  | .                  | .                  | .         |
| Vv05g0294 | Tc04_g030750       | .                  | Gorai.005G074000.1 | .         |
| .         | .                  | .                  | .                  | .         |
| Vv05g0295 | .                  | .                  | .                  | .         |
| .         | .                  | .                  | .                  | .         |
| Vv05g0296 | Tc04_g030770       | .                  | .                  | .         |
| .         | .                  | .                  | .                  | .         |
| Vv05g0297 | .                  | .                  | .                  | Vv14g0034 |
| .         | .                  | Gorai.013G210200.1 | .                  | .         |
| Vv05g0298 | .                  | .                  | .                  | .         |
| .         | .                  | .                  | .                  | .         |
| Vv05g0299 | .                  | .                  | .                  | .         |
| .         | .                  | .                  | .                  | .         |
| Vv05g0300 | Tc04_g024600       | .                  | .                  | .         |
| .         | .                  | .                  | .                  | .         |
| .         | .                  | .                  | .                  | .         |

|                    |              |                    |                    |   |   |                    |   |
|--------------------|--------------|--------------------|--------------------|---|---|--------------------|---|
| Vv05g0301          | .            | .                  | .                  | . | . | .                  | . |
| .                  | .            | .                  | .                  | . | . | .                  | . |
| Vv05g0302          | .            | .                  | .                  | . | . | .                  | . |
| .                  | .            | .                  | .                  | . | . | .                  | . |
| Vv05g0303          | Tc04_g029100 | .                  | .                  | . | . | .                  | . |
| .                  | .            | .                  | .                  | . | . | .                  | . |
| Vv05g0304          | .            | .                  | .                  | . | . | .                  | . |
| .                  | .            | .                  | .                  | . | . | .                  | . |
| .                  | Tc05_g004610 | Gorai.013G131600.1 | .                  | . | . | Vv14g0027          | . |
| 013G211000.1       | .            | .                  | .                  | . | . | Gorai.             | . |
| Vv05g0305          | .            | .                  | .                  | . | . | .                  | . |
| .                  | .            | .                  | .                  | . | . | .                  | . |
| Vv05g0306          | .            | .                  | .                  | . | . | .                  | . |
| .                  | .            | .                  | .                  | . | . | .                  | . |
| Vv05g0307          | .            | .                  | .                  | . | . | .                  | . |
| .                  | .            | .                  | .                  | . | . | .                  | . |
| Vv05g0308          | .            | .                  | .                  | . | . | .                  | . |
| .                  | .            | .                  | .                  | . | . | .                  | . |
| Vv05g0309          | .            | .                  | .                  | . | . | .                  | . |
| .                  | .            | .                  | .                  | . | . | .                  | . |
| Vv05g0310          | .            | .                  | .                  | . | . | Gorai.011G191000.1 | . |
| .                  | Vv07g0400    | .                  | .                  | . | . | .                  | . |
| Gorai.004G142300.1 | .            | .                  | .                  | . | . | .                  | . |
| .                  | .            | .                  | .                  | . | . | .                  | . |
| Vv05g0311          | .            | .                  | Gorai.005G060700.1 | . | . | .                  | . |
| .                  | .            | .                  | .                  | . | . | .                  | . |
| Vv05g0312          | .            | .                  | .                  | . | . | .                  | . |
| .                  | .            | .                  | .                  | . | . | .                  | . |
| Vv05g0313          | Tc04_g001060 | .                  | .                  | . | . | .                  | . |
| .                  | Vv07g0386    | Tc01_g030440       | .                  | . | . | .                  | . |
| Gorai.004G089400.1 | .            | .                  | .                  | . | . | .                  | . |
| .                  | .            | .                  | .                  | . | . | .                  | . |
| Vv05g0314          | .            | .                  | .                  | . | . | .                  | . |
| .                  | .            | .                  | .                  | . | . | .                  | . |
| Vv05g0315          | .            | .                  | .                  | . | . | .                  | . |
| .                  | .            | .                  | .                  | . | . | .                  | . |
| Vv05g0316          | .            | .                  | .                  | . | . | Gorai.011G190600.1 | . |
| Gorai.002G028400.1 | .            | .                  | .                  | . | . | .                  | . |

|              |                    |                    |                    |                    |        |  |
|--------------|--------------------|--------------------|--------------------|--------------------|--------|--|
| Vv05g0317    |                    |                    |                    |                    |        |  |
| Vv05g0318    |                    |                    | Gorai.005G060600.1 |                    |        |  |
| Vv05g0319    | Tc04_g024850       |                    |                    |                    |        |  |
| Vv05g0320    |                    |                    |                    | Gorai.011G190500.1 |        |  |
| Vv05g0321    | Tc04_g025170       |                    |                    |                    |        |  |
| Vv05g0322    |                    |                    |                    |                    | Gorai. |  |
| 002G027800.1 |                    |                    |                    |                    |        |  |
| Vv05g0323    |                    | Gorai.006G263900.1 |                    |                    |        |  |
| Vv05g0324    |                    |                    |                    |                    |        |  |
| Vv05g0325    |                    |                    |                    |                    |        |  |
| Vv05g0326    | Tc04_g005400       |                    |                    |                    |        |  |
| Vv05g0327    | Tc04_g001070       |                    |                    |                    |        |  |
| Vv05g0328    |                    | Gorai.006G263800.1 |                    |                    |        |  |
| Vv05g0329    |                    |                    |                    |                    | Gorai. |  |
| 002G028000.1 |                    |                    |                    |                    |        |  |
| Vv05g0330    |                    | Gorai.006G263600.1 |                    | Gorai.005G059800.1 |        |  |
|              |                    | Gorai.002G028100.1 |                    |                    |        |  |
| Vv05g0331    |                    | Gorai.006G263500.1 |                    |                    |        |  |
|              | Gorai.002G028200.1 |                    |                    |                    |        |  |
|              |                    | Vv14g0008          |                    |                    |        |  |
| Vv05g0332    |                    | Gorai.006G263400.1 |                    |                    |        |  |

|                    |              |                    |                    |        |        |   |
|--------------------|--------------|--------------------|--------------------|--------|--------|---|
| Gorai.011G189600.1 | .            | .                  | .                  | .      | .      | . |
| .                  | .            | .                  | .                  | .      | .      | . |
| .                  | .            | .                  | .                  | .      | .      | . |
| Vv05g0333          | .            | .                  | .                  | .      | .      | . |
| .                  | .            | .                  | .                  | .      | .      | . |
| .                  | .            | .                  | .                  | .      | .      | . |
| Vv05g0334          | Tc04_g028650 | Gorai.006G263300.1 | .                  | .      | .      | . |
| .                  | .            | .                  | .                  | .      | .      | . |
| .                  | .            | .                  | .                  | .      | .      | . |
| Vv05g0335          | .            | Gorai.006G263200.1 | .                  | .      | .      | . |
| .                  | .            | .                  | .                  | .      | .      | . |
| .                  | .            | .                  | .                  | .      | .      | . |
| Vv05g0336          | .            | .                  | .                  | .      | .      | . |
| .                  | .            | .                  | .                  | .      | .      | . |
| .                  | .            | .                  | .                  | .      | .      | . |
| Vv05g0337          | .            | .                  | .                  | .      | Gorai. | . |
| 002G028300.1       | Vv07g0364    | Tc01_g030240       | Gorai.007G129000.1 | .      | .      | . |
| .                  | .            | Gorai.004G052800.1 | Gorai.004G142100.1 | .      | .      | . |
| .                  | .            | .                  | .                  | .      | .      | . |
| Vv05g0338          | .            | .                  | .                  | .      | .      | . |
| .                  | .            | .                  | .                  | .      | .      | . |
| .                  | .            | .                  | .                  | .      | .      | . |
| Vv05g0339          | .            | .                  | .                  | .      | .      | . |
| .                  | .            | .                  | .                  | .      | .      | . |
| .                  | .            | .                  | .                  | .      | .      | . |
| Vv05g0340          | .            | .                  | .                  | .      | .      | . |
| .                  | .            | .                  | .                  | .      | .      | . |
| .                  | .            | .                  | .                  | .      | .      | . |
| Vv05g0341          | .            | .                  | .                  | .      | .      | . |
| .                  | .            | .                  | .                  | .      | .      | . |
| .                  | .            | .                  | .                  | .      | .      | . |
| Vv05g0342          | .            | Gorai.006G262700.1 | .                  | Gorai. | .      | . |
| 006G076000.1       | .            | .                  | .                  | .      | .      | . |
| .                  | .            | .                  | .                  | .      | .      | . |
| .                  | .            | .                  | .                  | .      | .      | . |
| Vv05g0343          | .            | Gorai.006G259700.1 | .                  | .      | .      | . |
| .                  | .            | .                  | .                  | .      | .      | . |
| .                  | .            | .                  | .                  | .      | .      | . |
| Vv05g0344          | .            | .                  | .                  | .      | .      | . |
| .                  | .            | .                  | .                  | .      | .      | . |
| .                  | .            | .                  | .                  | .      | .      | . |
| Vv05g0345          | Tc04_g005020 | .                  | .                  | .      | .      | . |
| .                  | .            | .                  | .                  | .      | .      | . |
| .                  | .            | .                  | .                  | .      | .      | . |
| Vv05g0346          | .            | .                  | .                  | .      | .      | . |
| .                  | .            | .                  | .                  | .      | .      | . |
| .                  | .            | .                  | .                  | .      | .      | . |
| Vv05g0347          | .            | Gorai.005G059300.1 | .                  | .      | .      | . |
| Gorai.011G188700.1 | .            | .                  | .                  | .      | .      | . |
| .                  | .            | .                  | .                  | .      | .      | . |
| .                  | .            | .                  | .                  | .      | .      | . |

|                    |                    |                    |                    |                    |   |   |   |
|--------------------|--------------------|--------------------|--------------------|--------------------|---|---|---|
| Vv05g0348          | .                  | .                  | .                  | .                  | . | . | . |
| .                  | .                  | .                  | .                  | .                  | . | . | . |
| Vv05g0349          | .                  | .                  | Gorai.005G059200.1 | .                  | . | . | . |
| Gorai.011G188600.1 | .                  | .                  | .                  | .                  | . | . | . |
| .                  | .                  | .                  | .                  | .                  | . | . | . |
| Vv05g0350          | .                  | .                  | .                  | .                  | . | . | . |
| Vv07g0337          | .                  | .                  | .                  | .                  | . | . | . |
| Vv05g0351          | .                  | .                  | Gorai.005G059100.1 | .                  | . | . | . |
| .                  | .                  | .                  | .                  | .                  | . | . | . |
| Vv05g0352          | .                  | .                  | .                  | .                  | . | . | . |
| .                  | .                  | .                  | .                  | .                  | . | . | . |
| Vv05g0353          | .                  | .                  | Gorai.005G058900.1 | .                  | . | . | . |
| .                  | .                  | .                  | .                  | .                  | . | . | . |
| Vv05g0354          | Tc04_g019190       | .                  | .                  | .                  | . | . | . |
| .                  | .                  | .                  | .                  | .                  | . | . | . |
| Vv05g0355          | .                  | .                  | Gorai.005G058800.1 | .                  | . | . | . |
| Gorai.011G188400.1 | Gorai.002G027000.1 | Vv07g0312          | .                  | .                  | . | . | . |
| Tc01_g029810       | Gorai.007G130500.1 | Gorai.             | .                  | .                  | . | . | . |
| 004G053200.1       | .                  | .                  | .                  | .                  | . | . | . |
| Vv05g0356          | Tc04_g025400       | Gorai.005G058700.1 | .                  | .                  | . | . | . |
| Gorai.011G188200.1 | .                  | .                  | .                  | .                  | . | . | . |
| .                  | .                  | .                  | .                  | .                  | . | . | . |
| Vv05g0357          | .                  | .                  | .                  | .                  | . | . | . |
| .                  | .                  | .                  | .                  | .                  | . | . | . |
| Vv05g0358          | .                  | .                  | .                  | Gorai.011G188100.1 | . | . | . |
| .                  | .                  | .                  | .                  | .                  | . | . | . |
| Vv05g0359          | .                  | .                  | .                  | .                  | . | . | . |
| .                  | .                  | .                  | .                  | .                  | . | . | . |
| Vv05g0360          | Tc04_g019130       | .                  | .                  | .                  | . | . | . |
| .                  | .                  | .                  | .                  | .                  | . | . | . |
| Vv05g0361          | Tc04_g025660       | .                  | .                  | Gorai.             | . | . | . |
| 011G187900.1       | .                  | .                  | .                  | .                  | . | . | . |
| .                  | .                  | .                  | .                  | .                  | . | . | . |
| Vv05g0362          | .                  | .                  | .                  | Gorai.011G187800.1 | . | . | . |
| .                  | .                  | .                  | .                  | .                  | . | . | . |
| .                  | .                  | .                  | .                  | .                  | . | . | . |



|                    |                    |   |                    |                    |                    |   |
|--------------------|--------------------|---|--------------------|--------------------|--------------------|---|
| Vv05g0363          | .                  | . | .                  | .                  | Gorai.011G187600.1 | . |
| .                  | .                  | . | .                  | .                  | .                  | . |
| Vv05g0364          | .                  | . | .                  | .                  | Gorai.011G187500.1 | . |
| .                  | .                  | . | .                  | .                  | .                  | . |
| Vv14g0265          | .                  | . | Gorai.013G125100.1 | .                  | Gorai.             | . |
| 007G298800.1       | Gorai.013G205300.1 | . | .                  | .                  | .                  | . |
| Vv05g0365          | .                  | . | Gorai.005G058600.1 | .                  | .                  | . |
| Gorai.011G187300.1 | .                  | . | Vv07g0307          | Tc01_g029730       | .                  | . |
| Gorai.007G130800.1 | .                  | . | Gorai.004G086400.1 | .                  | .                  | . |
| Gorai.004G140900.1 | .                  | . | .                  | .                  | .                  | . |
| .                  | .                  | . | .                  | .                  | .                  | . |
| Vv05g0366          | Tc04_g001350       | . | Gorai.005G058500.1 | .                  | .                  | . |
| Gorai.011G187200.1 | .                  | . | Vv07g0306          | .                  | .                  | . |
| Tc01_g029720       | Gorai.007G130900.1 | . | .                  | .                  | .                  | . |
| Gorai.004G140800.1 | .                  | . | .                  | .                  | .                  | . |
| .                  | .                  | . | .                  | .                  | .                  | . |
| Vv05g0367          | Tc04_g004590       | . | .                  | .                  | .                  | . |
| .                  | .                  | . | .                  | .                  | .                  | . |
| .                  | .                  | . | .                  | .                  | .                  | . |
| Vv05g0368          | .                  | . | Gorai.005G058400.1 | .                  | .                  | . |
| Gorai.011G187000.1 | .                  | . | .                  | .                  | .                  | . |
| .                  | Vv14g0285          | . | .                  | .                  | .                  | . |
| .                  | .                  | . | .                  | .                  | .                  | . |
| Vv05g0369          | Tc04_g018910       | . | Gorai.005G057700.1 | .                  | .                  | . |
| Gorai.006G075600.1 | .                  | . | .                  | .                  | .                  | . |
| .                  | .                  | . | .                  | .                  | .                  | . |
| .                  | .                  | . | .                  | .                  | .                  | . |
| Vv05g0370          | .                  | . | Gorai.005G057600.1 | .                  | .                  | . |
| Gorai.011G186700.1 | .                  | . | Vv07g0303          | Tc01_g029700       | .                  | . |
| .                  | .                  | . | Gorai.004G086200.1 | .                  | .                  | . |
| .                  | .                  | . | .                  | .                  | .                  | . |
| Vv05g0371          | .                  | . | Gorai.006G257600.1 | .                  | .                  | . |
| .                  | .                  | . | .                  | .                  | .                  | . |
| .                  | .                  | . | .                  | .                  | .                  | . |
| Vv05g0372          | .                  | . | Gorai.005G057500.1 | .                  | .                  | . |
| Gorai.011G186300.1 | .                  | . | .                  | .                  | .                  | . |
| .                  | .                  | . | .                  | .                  | .                  | . |
| .                  | .                  | . | .                  | .                  | .                  | . |
| Vv05g0373          | .                  | . | Gorai.006G257500.1 | Gorai.005G057400.1 | .                  | . |
| .                  | .                  | . | Vv07g0301          | Tc01_g029680       | .                  | . |
| Gorai.007G131100.1 | .                  | . | .                  | .                  | .                  | . |
| .                  | .                  | . | .                  | .                  | .                  | . |
| Vv05g0374          | .                  | . | .                  | Gorai.011G186200.1 | .                  | . |
| .                  | .                  | . | .                  | .                  | .                  | . |
| .                  | .                  | . | .                  | .                  | .                  | . |
| Vv05g0375          | .                  | . | .                  | .                  | .                  | . |
| .                  | .                  | . | .                  | .                  | .                  | . |
| .                  | .                  | . | .                  | .                  | .                  | . |
| Vv05g0376          | .                  | . | Gorai.006G257400.1 | .                  | .                  | . |

|                    |                    |                    |                    |                    |                    |   |   |
|--------------------|--------------------|--------------------|--------------------|--------------------|--------------------|---|---|
| Gorai.011G186100.1 | .                  | .                  | .                  | .                  | .                  | . | . |
| .                  | .                  | .                  | .                  | .                  | .                  | . | . |
| Vv05g0377          | .                  | .                  | .                  | .                  | .                  | . | . |
| .                  | .                  | .                  | .                  | .                  | .                  | . | . |
| Vv05g0378          | .                  | .                  | .                  | .                  | .                  | . | . |
| .                  | .                  | .                  | .                  | .                  | .                  | . | . |
| Vv05g0379          | .                  | .                  | .                  | .                  | .                  | . | . |
| .                  | .                  | .                  | .                  | .                  | .                  | . | . |
| Vv05g0380          | .                  | .                  | .                  | .                  | .                  | . | . |
| .                  | .                  | .                  | .                  | .                  | .                  | . | . |
| Vv05g0381          | .                  | .                  | .                  | .                  | Gorai.011G185900.1 | . | . |
| .                  | .                  | .                  | .                  | .                  | .                  | . | . |
| Vv05g0382          | .                  | .                  | .                  | .                  | .                  | . | . |
| .                  | .                  | .                  | .                  | .                  | .                  | . | . |
| Vv05g0383          | .                  | .                  | .                  | .                  | .                  | . | . |
| .                  | .                  | .                  | .                  | .                  | .                  | . | . |
| Vv05g0384          | .                  | .                  | Gorai.005G057300.1 | .                  | .                  | . | . |
| Gorai.011G185700.1 | .                  | .                  | .                  | .                  | .                  | . | . |
| .                  | .                  | .                  | .                  | .                  | .                  | . | . |
| Vv05g0385          | .                  | .                  | Gorai.005G057200.1 | Gorai.             | .                  | . | . |
| 006G075400.1       | Gorai.011G185600.1 | .                  | .                  | Vv07g0295          | .                  | . | . |
| Tc01_g029580       | Gorai.007G131500.1 | .                  | .                  | Gorai.             | .                  | . | . |
| 004G085800.1       | .                  | .                  | .                  | .                  | .                  | . | . |
| .                  | .                  | .                  | .                  | .                  | .                  | . | . |
| Vv05g0386          | .                  | .                  | .                  | .                  | .                  | . | . |
| .                  | .                  | .                  | .                  | .                  | .                  | . | . |
| Vv05g0387          | .                  | .                  | .                  | Gorai.006G075300.1 | .                  | . | . |
| .                  | .                  | .                  | .                  | .                  | .                  | . | . |
| Vv05g0388          | .                  | .                  | .                  | .                  | .                  | . | . |
| .                  | .                  | .                  | .                  | .                  | .                  | . | . |
| Vv05g0389          | .                  | Gorai.006G257200.1 | Gorai.005G057100.1 | .                  | .                  | . | . |
| Gorai.006G075200.1 | .                  | .                  | Vv07g0294          | .                  | .                  | . | . |
| Tc01_g029560       | .                  | .                  | .                  | .                  | .                  | . | . |
| .                  | .                  | .                  | .                  | .                  | .                  | . | . |
| Vv05g0390          | .                  | .                  | .                  | Gorai.011G185500.1 | .                  | . | . |
| .                  | .                  | .                  | .                  | .                  | .                  | . | . |
| Vv05g0391          | .                  | .                  | .                  | .                  | .                  | . | . |

|                    |                    |                    |   |   |   |   |
|--------------------|--------------------|--------------------|---|---|---|---|
| .                  | .                  | .                  | . | . | . | . |
| .                  | .                  | .                  | . | . | . | . |
| Vv05g0392          | Tc04_g024980       | .                  | . | . | . | . |
| .                  | .                  | .                  | . | . | . | . |
| .                  | .                  | .                  | . | . | . | . |
| Vv05g0393          | Tc04_g025070       | Gorai.006G257000.1 | . | . | . | . |
|                    | Gorai.011G166100.1 | .                  | . | . | . | . |
| .                  | .                  | .                  | . | . | . | . |
| .                  | .                  | .                  | . | . | . | . |
| Vv05g0394          | .                  | Gorai.006G075100.1 | . | . | . | . |
| .                  | .                  | .                  | . | . | . | . |
| .                  | .                  | .                  | . | . | . | . |
| Vv05g0395          | Tc04_g001430       | .                  | . | . | . | . |
| .                  | .                  | .                  | . | . | . | . |
| .                  | .                  | .                  | . | . | . | . |
| Vv05g0396          | .                  | .                  | . | . | . | . |
| .                  | .                  | .                  | . | . | . | . |
| .                  | .                  | .                  | . | . | . | . |
| Vv05g0397          | .                  | Gorai.005G056900.1 | . | . | . | . |
| Gorai.011G184900.1 | .                  | .                  | . | . | . | . |
| .                  | .                  | .                  | . | . | . | . |
| .                  | .                  | .                  | . | . | . | . |
| Vv05g0398          | .                  | Gorai.005G056800.1 | . | . | . | . |
| Gorai.011G184800.1 | .                  | .                  | . | . | . | . |
| .                  | .                  | .                  | . | . | . | . |
| .                  | .                  | .                  | . | . | . | . |
| Vv05g0399          | .                  | Gorai.011G184700.1 | . | . | . | . |
|                    | Gorai.002G026800.1 | .                  | . | . | . | . |
| .                  | .                  | .                  | . | . | . | . |
| .                  | .                  | .                  | . | . | . | . |
| Vv05g0400          | .                  | .                  | . | . | . | . |
| .                  | .                  | .                  | . | . | . | . |
| .                  | .                  | .                  | . | . | . | . |
| Vv05g0401          | Tc04_g004360       | .                  | . | . | . | . |
| .                  | .                  | .                  | . | . | . | . |
| .                  | .                  | .                  | . | . | . | . |
| Vv05g0402          | Tc04_g004350       | .                  | . | . | . | . |
| .                  | .                  | .                  | . | . | . | . |
| .                  | .                  | .                  | . | . | . | . |
| Vv05g0403          | .                  | .                  | . | . | . | . |
| .                  | .                  | .                  | . | . | . | . |
| .                  | .                  | .                  | . | . | . | . |
| Vv05g0404          | .                  | Gorai.011G184200.1 | . | . | . | . |
| .                  | .                  | .                  | . | . | . | . |
| .                  | .                  | .                  | . | . | . | . |
| Vv05g0405          | .                  | .                  | . | . | . | . |
| .                  | .                  | .                  | . | . | . | . |
| .                  | .                  | .                  | . | . | . | . |
| Vv05g0406          | .                  | .                  | . | . | . | . |
| .                  | .                  | .                  | . | . | . | . |

|                    |                    |                    |                    |                    |   |   |   |
|--------------------|--------------------|--------------------|--------------------|--------------------|---|---|---|
| Vv05g0407          | .                  | .                  | .                  | .                  | . | . | . |
| .                  | .                  | .                  | .                  | .                  | . | . | . |
| Vv05g0408          | .                  | .                  | .                  | .                  | . | . | . |
| .                  | .                  | .                  | .                  | .                  | . | . | . |
| Vv05g0409          | .                  | .                  | .                  | .                  | . | . | . |
| .                  | .                  | .                  | .                  | .                  | . | . | . |
| Vv05g0410          | .                  | .                  | .                  | Gorai.005G056500.1 | . | . | . |
| Gorai.011G183800.1 | .                  | .                  | Gorai.002G023800.1 | .                  | . | . | . |
| .                  | .                  | .                  | .                  | .                  | . | . | . |
| Vv05g0411          | .                  | .                  | .                  | .                  | . | . | . |
| .                  | .                  | .                  | .                  | .                  | . | . | . |
| Vv05g0412          | .                  | .                  | .                  | Gorai.006G074800.1 | . | . | . |
| Gorai.011G183300.1 | .                  | .                  | .                  | .                  | . | . | . |
| .                  | .                  | .                  | .                  | .                  | . | . | . |
| Vv05g0413          | .                  | Gorai.006G256700.1 | .                  | Gorai.005G056300.1 | . | . | . |
| .                  | Gorai.011G183100.1 | .                  | .                  | .                  | . | . | . |
| .                  | .                  | .                  | .                  | .                  | . | . | . |
| Vv05g0414          | .                  | Gorai.006G256600.1 | .                  | .                  | . | . | . |
| Gorai.011G182900.1 | .                  | Vv07g0259          | .                  | Tc01_g029180       | . | . | . |
| Gorai.007G132900.1 | .                  | .                  | .                  | .                  | . | . | . |
| .                  | .                  | .                  | .                  | .                  | . | . | . |
| Vv05g0415          | .                  | Gorai.006G256500.1 | .                  | .                  | . | . | . |
| Gorai.011G182800.1 | .                  | .                  | .                  | .                  | . | . | . |
| .                  | .                  | .                  | .                  | .                  | . | . | . |
| Vv05g0416          | .                  | .                  | .                  | .                  | . | . | . |
| .                  | .                  | .                  | .                  | .                  | . | . | . |
| Vv05g0417          | .                  | .                  | Gorai.005G056200.1 | .                  | . | . | . |
| Gorai.011G182600.1 | .                  | .                  | .                  | .                  | . | . | . |
| .                  | .                  | .                  | .                  | .                  | . | . | . |
| Vv05g0418          | Tc04_g025470       | .                  | .                  | .                  | . | . | . |
| .                  | .                  | .                  | .                  | .                  | . | . | . |
| Vv05g0419          | .                  | .                  | .                  | .                  | . | . | . |
| .                  | .                  | .                  | .                  | .                  | . | . | . |
| Vv05g0420          | .                  | .                  | Gorai.006G074600.1 | .                  | . | . | . |
| Gorai.011G182400.1 | .                  | .                  | .                  | .                  | . | . | . |
| .                  | .                  | .                  | .                  | .                  | . | . | . |
| .                  | .                  | .                  | .                  | .                  | . | . | . |

|                    |                    |                    |   |                    |
|--------------------|--------------------|--------------------|---|--------------------|
| Vv05g0421          | .                  | Gorai.006G256300.1 | . | .                  |
| Gorai.011G182100.1 | .                  | .                  | . | .                  |
| .                  | .                  | .                  | . | .                  |
| .                  | .                  | .                  | . | .                  |
| Vv05g0422          | .                  | .                  | . | Gorai.011G182000.1 |
| .                  | Vv07g0250          | Tc01_g029110       | . | Gorai.007G133200.1 |
| .                  | .                  | Gorai.004G215000.1 | . | .                  |
| .                  | .                  | .                  | . | .                  |
| Vv05g0423          | .                  | .                  | . | Gorai.011G181900.1 |
| .                  | .                  | .                  | . | .                  |
| .                  | .                  | .                  | . | .                  |
| Vv05g0424          | .                  | .                  | . | Gorai.011G181800.1 |
| .                  | .                  | .                  | . | .                  |
| .                  | .                  | .                  | . | .                  |
| Vv05g0425          | .                  | Gorai.006G256200.1 | . | Gorai.005G056100.1 |
| .                  | .                  | .                  | . | .                  |
| .                  | .                  | .                  | . | .                  |
| .                  | .                  | .                  | . | .                  |
| Vv05g0426          | .                  | .                  | . | .                  |
| .                  | .                  | .                  | . | .                  |
| .                  | .                  | .                  | . | .                  |
| Vv05g0427          | .                  | Gorai.006G256100.1 | . | .                  |
| .                  | .                  | .                  | . | .                  |
| .                  | .                  | .                  | . | .                  |
| Vv05g0428          | .                  | Gorai.006G256000.1 | . | .                  |
| .                  | .                  | .                  | . | .                  |
| .                  | .                  | .                  | . | .                  |
| Vv05g0429          | .                  | Gorai.006G255900.1 | . | Gorai.005G055900.1 |
| .                  | Gorai.011G181400.1 | .                  | . | .                  |
| .                  | .                  | .                  | . | .                  |
| .                  | .                  | .                  | . | .                  |
| Vv05g0430          | .                  | Gorai.006G255800.1 | . | Gorai.005G055800.1 |
| .                  | Gorai.011G181300.1 | .                  | . | .                  |
| .                  | .                  | .                  | . | .                  |
| .                  | .                  | .                  | . | .                  |
| Vv05g0431          | .                  | .                  | . | Gorai.011G181200.1 |
| .                  | Vv07g0239          | Tc01_g029000       | . | Gorai.007G133400.1 |
| .                  | .                  | .                  | . | .                  |
| .                  | .                  | .                  | . | .                  |
| Vv05g0432          | .                  | Gorai.006G255700.1 | . | .                  |
| .                  | .                  | .                  | . | .                  |
| .                  | .                  | .                  | . | .                  |
| Vv05g0433          | Tc04_g001660       | Gorai.006G255600.1 | . | .                  |
| .                  | .                  | .                  | . | .                  |
| .                  | .                  | .                  | . | .                  |
| Vv05g0434          | .                  | .                  | . | Gorai.006G074300.1 |
| .                  | .                  | .                  | . | .                  |
| .                  | .                  | .                  | . | .                  |
| .                  | .                  | .                  | . | .                  |
| Vv05g0435          | .                  | .                  | . | .                  |
| Vv07g0238          | Tc01_g028950       | .                  | . | Gorai.             |

|                    |                    |                    |                    |   |        |   |   |
|--------------------|--------------------|--------------------|--------------------|---|--------|---|---|
| 004G083900.1       | .                  | .                  | .                  | . | .      | . | . |
| Vv05g0436          | .                  | .                  | Gorai.005G055600.1 | . | .      | . | . |
| Gorai.011G181100.1 | .                  | .                  | .                  | . | .      | . | . |
| .                  | .                  | .                  | .                  | . | .      | . | . |
| Vv05g0437          | .                  | Gorai.006G255400.1 | Gorai.005G052600.1 | . | .      | . | . |
| Gorai.006G072000.1 | .                  | Gorai.011G178100.1 | .                  | . | .      | . | . |
| .                  | .                  | .                  | .                  | . | .      | . | . |
| Vv05g0438          | .                  | Gorai.006G218300.1 | .                  | . | .      | . | . |
| .                  | .                  | .                  | .                  | . | .      | . | . |
| Vv05g0439          | Tc04_g022620       | Gorai.006G218200.1 | .                  | . | .      | . | . |
| .                  | .                  | .                  | .                  | . | .      | . | . |
| Vv05g0440          | Tc04_g022630       | Gorai.006G218100.1 | .                  | . | .      | . | . |
| .                  | Vv07g0234          | .                  | .                  | . | .      | . | . |
| .                  | .                  | .                  | .                  | . | .      | . | . |
| Vv05g0441          | Tc04_g022640       | .                  | .                  | . | Gorai. | . | . |
| 011G168000.1       | .                  | .                  | .                  | . | .      | . | . |
| Vv05g0442          | Tc04_g022650       | .                  | .                  | . | Gorai. | . | . |
| 011G168100.1       | .                  | .                  | .                  | . | .      | . | . |
| Vv05g0443          | Tc04_g022660       | Gorai.006G218000.1 | .                  | . | .      | . | . |
| Gorai.011G168200.1 | .                  | .                  | .                  | . | .      | . | . |
| .                  | .                  | .                  | .                  | . | .      | . | . |
| Vv05g0444          | Tc04_g022670       | .                  | .                  | . | .      | . | . |
| Vv07g0227          | Tc01_g028870       | Gorai.007G134100.1 | .                  | . | .      | . | . |
| .                  | Gorai.004G055100.1 | Gorai.004G215300.1 | .                  | . | .      | . | . |
| .                  | .                  | .                  | .                  | . | .      | . | . |
| Vv05g0445          | Tc04_g022680       | .                  | .                  | . | .      | . | . |
| .                  | .                  | .                  | .                  | . | .      | . | . |
| Vv05g0446          | .                  | .                  | .                  | . | .      | . | . |
| .                  | .                  | .                  | .                  | . | .      | . | . |
| Vv05g0447          | Tc04_g022720       | Gorai.005G040100.1 | .                  | . | .      | . | . |
| .                  | Vv07g0216          | .                  | .                  | . | .      | . | . |
| .                  | .                  | .                  | .                  | . | .      | . | . |
| Vv05g0448          | Tc04_g022730       | Gorai.005G040200.1 | .                  | . | .      | . | . |
| .                  | Vv07g0215          | .                  | .                  | . | .      | . | . |
| .                  | .                  | .                  | .                  | . | .      | . | . |
| Vv05g0449          | Tc04_g022740       | Gorai.005G040300.1 | .                  | . | .      | . | . |
| .                  | .                  | .                  | .                  | . | .      | . | . |

|                    |              |                     |
|--------------------|--------------|---------------------|
| Vv05g0450          | Tc04_g022760 | Gorai.005G040400.1  |
| 007G134500.1       | Vv07g0210    | Tc01_g028830 Gorai. |
|                    |              | Gorai.004G055200.1  |
| Vv05g0451          | Tc04_g022770 |                     |
|                    |              |                     |
| Vv05g0452          | Tc04_g022780 | Gorai.              |
| 011G170000.1       |              |                     |
| Vv05g0453          | Tc04_g022790 | Gorai.005G040500.1  |
|                    |              |                     |
| Vv05g0454          | Tc04_g022810 | Gorai.005G040600.1  |
| Gorai.011G170300.1 |              | Vv07g0199           |
| Tc01_g028730       |              | Gorai.004G055400.1  |
|                    |              |                     |
| Vv05g0455          |              |                     |
|                    |              |                     |
| Vv05g0456          |              |                     |
| Vv07g0197          | Tc01_g028710 | Gorai.007G135400.1  |
| Gorai.004G082600.1 |              |                     |
|                    |              |                     |
| Vv05g0457          |              |                     |
|                    |              |                     |
| Vv05g0458          | Tc04_g022850 |                     |
|                    |              |                     |
| Vv05g0459          | Tc04_g022860 | Gorai.006G053500.1  |
|                    |              |                     |
| Vv05g0460          |              |                     |
|                    |              |                     |
| Vv05g0461          | Tc04_g022870 | Gorai.006G217400.1  |
| Gorai.006G053600.1 |              | Vv07g0196           |
| Gorai.007G135500.1 |              |                     |
|                    |              |                     |
| Vv05g0462          | Tc04_g022880 |                     |
|                    |              |                     |
| Vv05g0463          | Tc04_g022910 | Gorai.006G053800.1  |
|                    |              |                     |
|                    | Vv14g0389    | Tc04_g025620        |
| Gorai.006G053800.1 |              |                     |
| Vv05g0464          | Tc04_g022920 | Gorai.006G054000.1  |
|                    |              |                     |

|                    |                    |                    |   |           |
|--------------------|--------------------|--------------------|---|-----------|
| .                  | Vv14g0388          | Tc04_g022920       | . | Gorai.    |
| 007G295300.1       | .                  | .                  | . | .         |
| Vv05g0465          | Tc04_g022930       | Gorai.006G217200.1 | . | .         |
| Gorai.006G054300.1 | .                  | .                  | . | .         |
| .                  | .                  | .                  | . | .         |
| .                  | .                  | .                  | . | .         |
| Vv05g0466          | Tc04_g022950       | Gorai.006G214300.1 | . | .         |
| .                  | .                  | .                  | . | .         |
| .                  | .                  | .                  | . | .         |
| Vv05g0467          | Tc04_g022970       | .                  | . | .         |
| Vv07g0187          | .                  | .                  | . | Gorai.    |
| 004G081800.1       | Gorai.004G242400.1 | Vv14g0387          | . | .         |
| Tc04_g022960       | Gorai.007G295400.1 | .                  | . | .         |
| Gorai.004G215700.1 | .                  | .                  | . | .         |
| Vv05g0468          | Tc04_g022990       | .                  | . | .         |
| Vv07g0186          | .                  | .                  | . | .         |
| Gorai.004G242500.1 | Vv14g0386          | Tc04_g022980       | . | .         |
| .                  | .                  | .                  | . | .         |
| Vv05g0469          | Tc04_g023030       | Gorai.006G236300.1 | . | .         |
| .                  | .                  | .                  | . | .         |
| .                  | .                  | .                  | . | .         |
| Vv05g0470          | .                  | .                  | . | Vv14g0385 |
| .                  | .                  | .                  | . | .         |
| .                  | .                  | .                  | . | .         |
| Vv05g0471          | .                  | .                  | . | .         |
| .                  | .                  | .                  | . | .         |
| .                  | .                  | .                  | . | .         |
| Vv05g0472          | .                  | .                  | . | .         |
| .                  | .                  | .                  | . | .         |
| .                  | .                  | .                  | . | .         |
| Vv05g0473          | .                  | .                  | . | .         |
| .                  | .                  | .                  | . | .         |
| .                  | .                  | .                  | . | .         |
| Vv05g0474          | .                  | .                  | . | .         |
| .                  | .                  | .                  | . | .         |
| .                  | .                  | .                  | . | .         |
| Vv05g0475          | Tc04_g023050       | Gorai.005G040900.1 | . | .         |
| .                  | .                  | .                  | . | .         |
| .                  | .                  | .                  | . | .         |
| Vv05g0476          | Tc04_g023060       | Gorai.005G041000.1 | . | .         |
| .                  | .                  | .                  | . | .         |
| .                  | .                  | .                  | . | .         |
| Vv05g0477          | .                  | .                  | . | .         |
| .                  | .                  | .                  | . | .         |
| .                  | .                  | .                  | . | .         |
| Vv05g0478          | Tc04_g023070       | Gorai.005G041100.1 | . | .         |
| .                  | Vv07g0183          | .                  | . | .         |
| .                  | .                  | .                  | . | .         |
| .                  | .                  | .                  | . | .         |
| Vv05g0479          | Tc04_g023080       | Gorai.006G236400.1 | . | .         |



|                    |              |                    |                    |        |        |   |
|--------------------|--------------|--------------------|--------------------|--------|--------|---|
| .                  | .            | .                  | .                  | .      | .      | . |
| .                  | .            | .                  | .                  | .      | .      | . |
| Vv05g0480          | Tc04_g023090 | .                  | .                  | .      | .      | . |
| .                  | .            | .                  | .                  | .      | .      | . |
| .                  | .            | .                  | .                  | .      | .      | . |
| Vv05g0481          | Tc04_g023110 | .                  | .                  | .      | .      | . |
| .                  | .            | .                  | .                  | .      | .      | . |
| .                  | .            | .                  | .                  | .      | .      | . |
| Vv05g0482          | Tc04_g023140 | .                  | .                  | .      | .      | . |
| .                  | .            | .                  | .                  | .      | .      | . |
| .                  | .            | .                  | .                  | .      | .      | . |
| Vv05g0483          | Tc04_g023180 | Gorai.006G236500.1 | .                  | .      | .      | . |
| .                  | .            | .                  | .                  | .      | .      | . |
| .                  | .            | .                  | .                  | .      | .      | . |
| Vv05g0484          | Tc04_g023190 | .                  | .                  | .      | Gorai. | . |
| 011G165900.1       | .            | .                  | .                  | .      | .      | . |
| .                  | .            | .                  | .                  | .      | .      | . |
| Vv05g0485          | Tc04_g023200 | Gorai.006G236600.1 | .                  | .      | .      | . |
| .                  | .            | .                  | .                  | .      | .      | . |
| .                  | .            | .                  | .                  | .      | .      | . |
| Vv05g0486          | .            | .                  | .                  | .      | .      | . |
| .                  | .            | .                  | .                  | .      | .      | . |
| .                  | .            | .                  | .                  | .      | .      | . |
| Vv05g0487          | .            | .                  | .                  | .      | .      | . |
| .                  | .            | .                  | .                  | .      | .      | . |
| .                  | .            | .                  | .                  | .      | .      | . |
| Vv05g0488          | .            | .                  | .                  | .      | .      | . |
| .                  | .            | .                  | .                  | .      | .      | . |
| .                  | .            | .                  | .                  | .      | .      | . |
| Vv05g0489          | Tc04_g023210 | .                  | Gorai.005G041200.1 | .      | .      | . |
| .                  | .            | .                  | .                  | .      | .      | . |
| .                  | Vv14g0370    | Tc04_g023210       | Gorai.013G123800.1 | .      | .      | . |
| .                  | .            | Gorai.006G052800.1 | .                  | .      | .      | . |
| Vv05g0490          | Tc04_g023230 | .                  | Gorai.005G041300.1 | .      | .      | . |
| .                  | .            | .                  | .                  | .      | .      | . |
| .                  | Vv14g0365    | Tc04_g023230       | .                  | Gorai. | .      | . |
| 007G296500.1       | .            | .                  | .                  | .      | .      | . |
| Vv05g0491          | Tc04_g023240 | .                  | .                  | .      | .      | . |
| .                  | .            | .                  | .                  | .      | .      | . |
| .                  | .            | .                  | .                  | .      | .      | . |
| Vv05g0492          | .            | .                  | .                  | .      | .      | . |
| .                  | .            | .                  | .                  | .      | .      | . |
| .                  | .            | .                  | .                  | .      | .      | . |
| Vv05g0493          | .            | .                  | .                  | .      | .      | . |
| .                  | .            | .                  | .                  | .      | .      | . |
| .                  | .            | .                  | .                  | .      | .      | . |
| Vv05g0494          | Tc04_g023260 | .                  | Gorai.005G041400.1 | .      | .      | . |
| Gorai.006G053000.1 | .            | .                  | .                  | .      | .      | . |
| .                  | .            | .                  | .                  | .      | .      | . |
| .                  | .            | .                  | .                  | .      | .      | . |
| .                  | .            | .                  | .                  | .      | .      | . |

|              |                    |                    |                    |                    |        |   |
|--------------|--------------------|--------------------|--------------------|--------------------|--------|---|
| Vv05g0495    | Tc04_g023270       | .                  | .                  | .                  | .      | . |
| .            | .                  | .                  | .                  | .                  | .      | . |
| Vv05g0496    | Tc04_g023290       | .                  | .                  | .                  | .      | . |
| .            | .                  | .                  | .                  | .                  | .      | . |
| Vv05g0497    | Tc04_g023300       | .                  | .                  | .                  | Gorai. | . |
| 011G166200.1 | .                  | .                  | .                  | .                  | .      | . |
| .            | .                  | .                  | .                  | .                  | .      | . |
| Vv05g0498    | .                  | .                  | .                  | .                  | .      | . |
| .            | .                  | .                  | .                  | .                  | .      | . |
| Vv05g0499    | Tc04_g023310       | .                  | .                  | .                  | .      | . |
| .            | .                  | .                  | .                  | .                  | .      | . |
| Vv05g0500    | Tc04_g023320       | Gorai.006G237000.1 | .                  | .                  | .      | . |
| .            | .                  | .                  | .                  | .                  | .      | . |
| Vv05g0501    | Tc04_g023330       | .                  | .                  | .                  | .      | . |
| .            | .                  | .                  | .                  | .                  | .      | . |
| Vv05g0502    | .                  | Gorai.006G237100.1 | Gorai.005G041500.1 | .                  | .      | . |
| .            | .                  | .                  | .                  | .                  | .      | . |
| .            | .                  | .                  | .                  | .                  | .      | . |
| Vv05g0503    | Tc04_g023340       | .                  | .                  | .                  | .      | . |
| .            | .                  | .                  | .                  | .                  | .      | . |
| Vv05g0504    | Tc04_g023350       | Gorai.006G237200.1 | .                  | .                  | .      | . |
| .            | .                  | .                  | .                  | .                  | .      | . |
| Vv05g0505    | .                  | .                  | .                  | .                  | .      | . |
| .            | .                  | .                  | .                  | .                  | .      | . |
| Vv05g0506    | .                  | .                  | .                  | .                  | .      | . |
| .            | .                  | .                  | .                  | .                  | .      | . |
| Vv05g0507    | Tc04_g023390       | .                  | .                  | .                  | .      | . |
| .            | .                  | .                  | .                  | .                  | .      | . |
| Vv05g0508    | Tc04_g023400       | .                  | .                  | Gorai.006G052200.1 | .      | . |
| .            | Gorai.002G023900.1 | .                  | .                  | .                  | .      | . |
| .            | .                  | Vv14g0331          | Tc04_g023400       | .                  | .      | . |
| .            | Gorai.007G342400.1 | .                  | Gorai.002G023900.1 | .                  | .      | . |
| Vv05g0509    | Tc04_g023410       | .                  | .                  | Gorai.             | .      | . |
| 011G168600.1 | Gorai.002G024000.1 | .                  | .                  | .                  | .      | . |
| .            | .                  | .                  | .                  | .                  | .      | . |
| Vv05g0510    | .                  | .                  | .                  | .                  | .      | . |
| .            | .                  | .                  | .                  | .                  | .      | . |

|              |                    |                    |        |                    |   |   |   |
|--------------|--------------------|--------------------|--------|--------------------|---|---|---|
| Vv05g0511    | .                  | .                  | .      | .                  | . | . | . |
| .            | .                  | .                  | .      | .                  | . | . | . |
| Vv05g0512    | Tc04_g023430       | .                  | .      | Gorai.006G051900.1 | . | . | . |
| .            | .                  | .                  | .      | .                  | . | . | . |
| Vv05g0513    | .                  | .                  | .      | .                  | . | . | . |
| .            | .                  | .                  | .      | .                  | . | . | . |
| Vv05g0514    | Tc04_g023440       | Gorai.006G237500.1 | .      | .                  | . | . | . |
|              | Gorai.011G169100.1 | Vv07g0172          | .      | .                  | . | . | . |
| Tc01_g027640 | Gorai.007G137200.1 | .                  | .      | Gorai.             | . | . | . |
| 004G079700.1 | .                  | .                  | .      | .                  | . | . | . |
| .            | .                  | .                  | .      | .                  | . | . | . |
| Vv05g0515    | Tc04_g023450       | .                  | .      | Gorai.006G051800.1 | . | . | . |
| .            | .                  | .                  | .      | .                  | . | . | . |
| Vv05g0516    | Tc04_g023460       | Gorai.006G237700.1 | .      | .                  | . | . | . |
| .            | Vv07g0170          | Tc01_g027740       | .      | .                  | . | . | . |
| .            | .                  | .                  | .      | .                  | . | . | . |
| Vv05g0517    | .                  | .                  | .      | .                  | . | . | . |
| .            | .                  | .                  | .      | .                  | . | . | . |
| Vv05g0518    | Tc04_g023470       | Gorai.006G238000.1 | Gorai. | .                  | . | . | . |
| 005G041600.1 | Gorai.011G169300.1 | .                  | .      | .                  | . | . | . |
| .            | .                  | .                  | .      | .                  | . | . | . |
| Vv05g0519    | Tc04_g023490       | Gorai.006G238200.1 | Gorai. | .                  | . | . | . |
| 005G041900.1 | .                  | .                  | .      | .                  | . | . | . |
| .            | .                  | Vv14g0323          | .      | .                  | . | . | . |
| .            | .                  | .                  | .      | .                  | . | . | . |
| Vv05g0520    | Tc04_g023500       | Gorai.005G042000.1 | .      | .                  | . | . | . |
| .            | Vv07g0163          | Tc01_g027810       | .      | .                  | . | . | . |
| .            | Gorai.004G079200.1 | .                  | .      | .                  | . | . | . |
| .            | .                  | .                  | .      | .                  | . | . | . |
| Vv05g0521    | .                  | .                  | .      | .                  | . | . | . |
| .            | .                  | .                  | .      | .                  | . | . | . |
| Vv05g0522    | Tc04_g023510       | .                  | .      | .                  | . | . | . |
| .            | .                  | .                  | .      | .                  | . | . | . |
| Vv05g0523    | .                  | .                  | .      | .                  | . | . | . |
| .            | .                  | .                  | .      | .                  | . | . | . |
| Vv05g0524    | Tc04_g023520       | .                  | .      | .                  | . | . | . |
| .            | .                  | .                  | .      | .                  | . | . | . |
| Vv05g0525    | .                  | .                  | .      | .                  | . | . | . |

|                    |              |   |                    |        |   |
|--------------------|--------------|---|--------------------|--------|---|
| .                  | .            | . | .                  | .      | . |
| .                  | .            | . | .                  | .      | . |
| Vv05g0526          | Tc04_g023580 | . | .                  | .      | . |
| .                  | .            | . | .                  | .      | . |
| .                  | .            | . | .                  | .      | . |
| Vv05g0527          | .            | . | .                  | .      | . |
| .                  | .            | . | .                  | .      | . |
| .                  | .            | . | .                  | .      | . |
| Vv05g0528          | .            | . | .                  | .      | . |
| .                  | .            | . | .                  | .      | . |
| .                  | .            | . | .                  | .      | . |
| Vv05g0529          | .            | . | Gorai.005G042100.1 | Gorai. | . |
| 006G051500.1       | .            | . | .                  | .      | . |
| .                  | .            | . | .                  | .      | . |
| .                  | .            | . | .                  | .      | . |
| Vv05g0530          | Tc04_g023590 | . | .                  | .      | . |
| .                  | .            | . | .                  | .      | . |
| .                  | .            | . | .                  | .      | . |
| Vv05g0531          | .            | . | .                  | .      | . |
| .                  | .            | . | .                  | .      | . |
| .                  | .            | . | .                  | .      | . |
| Vv05g0532          | Tc04_g023600 | . | Gorai.006G238300.1 | .      | . |
| Gorai.006G048800.1 | .            | . | .                  | .      | . |
| .                  | .            | . | .                  | .      | . |
| .                  | .            | . | .                  | .      | . |
| Vv05g0533          | .            | . | .                  | .      | . |
| .                  | .            | . | .                  | .      | . |
| .                  | .            | . | .                  | .      | . |
| Vv05g0534          | .            | . | .                  | .      | . |
| .                  | .            | . | .                  | .      | . |
| .                  | .            | . | .                  | .      | . |
| Vv05g0535          | Tc04_g023610 | . | .                  | .      | . |
| .                  | .            | . | .                  | .      | . |
| .                  | .            | . | .                  | .      | . |
| Vv05g0536          | .            | . | .                  | .      | . |
| .                  | .            | . | .                  | .      | . |
| .                  | .            | . | .                  | .      | . |
| Vv05g0537          | Tc04_g023620 | . | Gorai.006G238500.1 | .      | . |
| .                  | .            | . | .                  | .      | . |
| .                  | .            | . | .                  | .      | . |
| Vv05g0538          | .            | . | .                  | .      | . |
| Vv07g0159          | Tc01_g027870 | . | Gorai.007G137800.1 | .      | . |
| Gorai.004G079100.1 | .            | . | .                  | .      | . |
| .                  | .            | . | .                  | .      | . |
| Vv05g0539          | Tc04_g023630 | . | Gorai.005G042200.1 | .      | . |
| .                  | .            | . | .                  | .      | . |
| .                  | .            | . | .                  | .      | . |
| Vv05g0540          | Tc04_g023640 | . | Gorai.006G238700.1 | Gorai. | . |
| 005G042300.1       | .            | . | Vv07g0156          | .      | . |
| .                  | .            | . | .                  | .      | . |
| .                  | .            | . | .                  | .      | . |

|                    |              |                    |                    |   |   |   |
|--------------------|--------------|--------------------|--------------------|---|---|---|
| Vv05g0541          | Tc04_g023660 | .                  | .                  | . | . | . |
| .                  | .            | .                  | .                  | . | . | . |
| Vv05g0542          | .            | .                  | .                  | . | . | . |
| .                  | .            | .                  | .                  | . | . | . |
| Vv05g0543          | Tc04_g023670 | .                  | Gorai.005G042400.1 | . | . | . |
| Gorai.006G049500.1 | .            | .                  | .                  | . | . | . |
| .                  | .            | .                  | .                  | . | . | . |
| Vv05g0544          | .            | .                  | .                  | . | . | . |
| .                  | .            | .                  | .                  | . | . | . |
| Vv05g0545          | .            | .                  | .                  | . | . | . |
| .                  | .            | .                  | .                  | . | . | . |
| Vv05g0546          | Tc04_g023730 | Gorai.006G239000.1 | Gorai.             | . | . | . |
| 005G042800.1       | .            | .                  | Vv07g0154          | . | . | . |
| Tc01_g027910       | .            | .                  | Gorai.004G078800.1 | . | . | . |
| .                  | .            | .                  | .                  | . | . | . |
| Vv05g0547          | Tc04_g023740 | Gorai.006G239100.1 | .                  | . | . | . |
| .                  | .            | .                  | .                  | . | . | . |
| Vv05g0548          | Tc04_g023750 | .                  | .                  | . | . | . |
| .                  | .            | .                  | .                  | . | . | . |
| Vv05g0549          | .            | .                  | .                  | . | . | . |
| Vv07g0152          | .            | .                  | .                  | . | . | . |
| .                  | .            | .                  | .                  | . | . | . |
| Vv05g0550          | Tc04_g023760 | .                  | .                  | . | . | . |
| .                  | .            | .                  | .                  | . | . | . |
| Vv05g0551          | .            | Gorai.006G239300.1 | Gorai.005G042900.1 | . | . | . |
| .                  | .            | .                  | .                  | . | . | . |
| .                  | .            | .                  | .                  | . | . | . |
| Vv05g0552          | Tc04_g023770 | .                  | .                  | . | . | . |
| .                  | .            | .                  | .                  | . | . | . |
| Vv05g0553          | Tc04_g023780 | Gorai.006G239400.1 | .                  | . | . | . |
| .                  | .            | .                  | .                  | . | . | . |
| Vv05g0554          | .            | .                  | .                  | . | . | . |
| .                  | .            | .                  | .                  | . | . | . |
| Vv05g0555          | .            | .                  | .                  | . | . | . |
| .                  | .            | .                  | .                  | . | . | . |
| Vv05g0556          | Tc04_g023800 | Gorai.006G239600.1 | .                  | . | . | . |

|                    |                    |                    |        |   |   |   |   |
|--------------------|--------------------|--------------------|--------|---|---|---|---|
| .                  | .                  | .                  | .      | . | . | . | . |
| .                  | .                  | .                  | .      | . | . | . | . |
| Vv05g0557          | .                  | .                  | .      | . | . | . | . |
| .                  | .                  | .                  | .      | . | . | . | . |
| .                  | .                  | .                  | .      | . | . | . | . |
| Vv05g0558          | Tc04_g023820       | Gorai.006G239700.1 | .      | . | . | . | . |
| .                  | .                  | .                  | .      | . | . | . | . |
| .                  | .                  | .                  | .      | . | . | . | . |
| Vv05g0559          | Tc04_g023830       | Gorai.005G043200.1 | .      | . | . | . | . |
| .                  | Vv07g0150          | Tc01_g027970       | Gorai. | . | . | . | . |
| 007G138200.1       | .                  | Gorai.004G078600.1 | .      | . | . | . | . |
| .                  | .                  | .                  | .      | . | . | . | . |
| Vv05g0560          | Tc04_g023840       | .                  | .      | . | . | . | . |
| Gorai.002G024200.1 | .                  | .                  | .      | . | . | . | . |
| .                  | .                  | .                  | .      | . | . | . | . |
| Vv05g0561          | .                  | .                  | .      | . | . | . | . |
| .                  | .                  | .                  | .      | . | . | . | . |
| .                  | .                  | .                  | .      | . | . | . | . |
| Vv05g0562          | Tc04_g023850       | .                  | .      | . | . | . | . |
| .                  | .                  | .                  | .      | . | . | . | . |
| .                  | .                  | .                  | .      | . | . | . | . |
| Vv05g0563          | Tc04_g023880       | .                  | .      | . | . | . | . |
| .                  | .                  | .                  | .      | . | . | . | . |
| .                  | .                  | .                  | .      | . | . | . | . |
| Vv05g0564          | Tc04_g023890       | Gorai.006G239800.1 | Gorai. | . | . | . | . |
| 005G043500.1       | .                  | .                  | .      | . | . | . | . |
| .                  | .                  | .                  | .      | . | . | . | . |
| .                  | .                  | .                  | .      | . | . | . | . |
| Vv05g0565          | .                  | .                  | .      | . | . | . | . |
| .                  | .                  | .                  | .      | . | . | . | . |
| .                  | .                  | .                  | .      | . | . | . | . |
| Vv05g0566          | Tc04_g023910       | .                  | .      | . | . | . | . |
| .                  | .                  | .                  | .      | . | . | . | . |
| .                  | .                  | .                  | .      | . | . | . | . |
| Vv05g0567          | Tc04_g023920       | Gorai.006G239900.1 | .      | . | . | . | . |
| .                  | Gorai.002G024300.1 | Vv07g0149          | .      | . | . | . | . |
| .                  | .                  | .                  | .      | . | . | . | . |
| .                  | .                  | .                  | .      | . | . | . | . |
| Vv05g0568          | Tc04_g023930       | .                  | .      | . | . | . | . |
| .                  | .                  | .                  | .      | . | . | . | . |
| .                  | .                  | .                  | .      | . | . | . | . |
| Vv05g0569          | Tc04_g023940       | .                  | .      | . | . | . | . |
| .                  | .                  | .                  | .      | . | . | . | . |
| .                  | .                  | .                  | .      | . | . | . | . |
| Vv05g0570          | .                  | .                  | .      | . | . | . | . |
| .                  | .                  | .                  | .      | . | . | . | . |
| .                  | .                  | .                  | .      | . | . | . | . |
| Vv05g0571          | Tc04_g023950       | Gorai.006G240000.1 | .      | . | . | . | . |
| .                  | .                  | .                  | .      | . | . | . | . |
| .                  | .                  | .                  | .      | . | . | . | . |

|                    |                    |                    |                    |        |   |   |   |
|--------------------|--------------------|--------------------|--------------------|--------|---|---|---|
| Vv05g0572          | .                  | .                  | .                  | .      | . | . | . |
| .                  | .                  | .                  | .                  | .      | . | . | . |
| Vv05g0573          | Tc04_g023960       | Gorai.006G240100.1 | .                  | .      | . | . | . |
| .                  | .                  | .                  | .                  | .      | . | . | . |
| Vv05g0574          | Tc04_g023970       | Gorai.006G240200.1 | .                  | .      | . | . | . |
| .                  | .                  | .                  | .                  | .      | . | . | . |
| Vv05g0575          | Tc04_g023980       | .                  | .                  | .      | . | . | . |
| .                  | .                  | .                  | .                  | .      | . | . | . |
| Vv05g0576          | Tc04_g023990       | .                  | Gorai.005G044300.1 | .      | . | . | . |
| .                  | .                  | .                  | .                  | .      | . | . | . |
| Vv05g0577          | Tc04_g024000       | .                  | Gorai.005G044500.1 | .      | . | . | . |
| .                  | .                  | .                  | .                  | .      | . | . | . |
| Vv05g0578          | .                  | .                  | .                  | .      | . | . | . |
| .                  | .                  | .                  | .                  | .      | . | . | . |
| Vv05g0579          | .                  | .                  | .                  | .      | . | . | . |
| .                  | .                  | .                  | .                  | .      | . | . | . |
| Vv05g0580          | Tc04_g024010       | .                  | .                  | .      | . | . | . |
| .                  | .                  | .                  | .                  | .      | . | . | . |
| Vv05g0581          | Tc04_g024020       | Gorai.006G240400.1 | .                  | .      | . | . | . |
| .                  | Vv07g0144          | Tc01_g028030       | Gorai.             | .      | . | . | . |
| 007G138600.1       | .                  | Gorai.004G216700.1 | .                  | .      | . | . | . |
| .                  | .                  | .                  | .                  | .      | . | . | . |
| Vv05g0582          | Tc04_g024030       | Gorai.006G240500.1 | .                  | .      | . | . | . |
| .                  | Vv07g0142          | Tc01_g028070       | .                  | .      | . | . | . |
| .                  | .                  | .                  | .                  | .      | . | . | . |
| Vv05g0583          | Tc04_g024040       | Gorai.006G240600.1 | .                  | .      | . | . | . |
| .                  | Vv07g0138          | Tc01_g028080       | .                  | .      | . | . | . |
| .                  | .                  | .                  | .                  | .      | . | . | . |
| Vv05g0584          | Tc04_g024060       | Gorai.006G240800.1 | .                  | .      | . | . | . |
| .                  | .                  | .                  | .                  | .      | . | . | . |
| Vv05g0585          | Tc04_g024100       | Gorai.006G241200.1 | .                  | .      | . | . | . |
| Gorai.011G165500.1 | .                  | Vv07g0130          | .                  | .      | . | . | . |
| Tc01_g028180       | Gorai.007G139100.1 | .                  | .                  | Gorai. | . | . | . |
| 004G078100.1       | Gorai.004G217200.1 | .                  | .                  | .      | . | . | . |
| .                  | .                  | .                  | .                  | .      | . | . | . |
| Vv05g0586          | .                  | .                  | .                  | .      | . | . | . |
| .                  | .                  | .                  | .                  | .      | . | . | . |
| .                  | .                  | .                  | .                  | .      | . | . | . |

|                    |              |                    |                    |        |
|--------------------|--------------|--------------------|--------------------|--------|
| Vv05g0587          | Tc04_g024110 | Gorai.006G241400.1 | .                  | .      |
| .                  | .            | .                  | .                  | .      |
| Vv05g0588          | Tc04_g024120 | .                  | .                  | .      |
| .                  | .            | .                  | .                  | .      |
| Vv05g0589          | .            | .                  | .                  | .      |
| .                  | .            | .                  | .                  | .      |
| Vv05g0590          | .            | .                  | .                  | .      |
| .                  | .            | .                  | .                  | .      |
| Vv05g0591          | Tc04_g024130 | .                  | .                  | Gorai. |
| 011G165600.1       | .            | .                  | .                  | .      |
| .                  | .            | .                  | .                  | .      |
| Vv05g0592          | Tc04_g024140 | .                  | .                  | Gorai. |
| 011G165700.1       | .            | .                  | .                  | .      |
| .                  | .            | .                  | .                  | .      |
| Vv05g0593          | Tc04_g024150 | .                  | Gorai.005G044600.1 | .      |
| Gorai.006G067900.1 | .            | .                  | Vv07g0126          | .      |
| Tc01_g028210       | .            | .                  | Gorai.004G078000.1 | .      |
| .                  | .            | .                  | .                  | .      |
| Vv05g0594          | Tc04_g024160 | Gorai.006G241500.1 | .                  | Gorai. |
| 005G044700.1       | .            | Gorai.011G167400.1 | .                  | .      |
| .                  | .            | .                  | .                  | .      |
| Vv05g0595          | Tc04_g024170 | .                  | Gorai.005G044800.1 | .      |
| .                  | .            | .                  | .                  | .      |
| .                  | Vv14g0592    | Tc04_g024170       | Gorai.013G121300.1 | .      |
| Gorai.007G284200.1 | .            | .                  | .                  | .      |
| Vv05g0596          | Tc04_g024180 | Gorai.006G241600.1 | .                  | .      |
| .                  | Vv07g0122    | Tc01_g028240       | Gorai.             | .      |
| 007G139300.1       | .            | Gorai.004G077700.1 | Gorai.             | .      |
| 004G217300.1       | .            | .                  | .                  | .      |
| Vv05g0597          | Tc04_g024200 | .                  | .                  | .      |
| .                  | .            | .                  | .                  | .      |
| .                  | .            | .                  | .                  | .      |
| Vv05g0598          | Tc04_g024210 | .                  | .                  | .      |
| Gorai.002G024400.1 | .            | .                  | .                  | .      |
| .                  | .            | .                  | .                  | .      |
| Vv05g0599          | .            | .                  | .                  | .      |
| Vv07g0121          | Tc01_g028250 | Gorai.007G139400.1 | .                  | .      |
| .                  | .            | .                  | .                  | .      |
| .                  | .            | .                  | .                  | .      |
| Vv05g0600          | .            | .                  | .                  | .      |
| .                  | .            | .                  | .                  | .      |
| .                  | .            | .                  | .                  | .      |
| Vv05g0601          | .            | .                  | .                  | .      |
| .                  | .            | .                  | .                  | .      |
| .                  | .            | .                  | .                  | .      |



|                    |                    |                    |              |   |        |
|--------------------|--------------------|--------------------|--------------|---|--------|
| Vv05g0602          | Tc04_g024220       | .                  | .            | . | Gorai. |
| 011G167600.1       | Vv07g0118          | .                  | .            | . | .      |
| .                  | .                  | .                  | .            | . | .      |
| .                  | .                  | .                  | .            | . | .      |
| Vv05g0603          | Tc04_g024240       | Gorai.006G241800.1 | .            | . | .      |
| Gorai.011G167700.1 | .                  | .                  | .            | . | .      |
| .                  | .                  | Vv14g0601          | Tc04_g024240 | . | .      |
| .                  | Gorai.013G201400.1 | Gorai.011G167700.1 | .            | . | .      |
| Vv05g0604          | .                  | .                  | .            | . | .      |
| .                  | .                  | .                  | .            | . | .      |
| .                  | .                  | .                  | .            | . | .      |
| Vv05g0605          | Tc04_g024250       | Gorai.006G241900.1 | Gorai.       | . | .      |
| 005G045100.1       | .                  | .                  | .            | . | .      |
| .                  | .                  | .                  | .            | . | .      |
| .                  | .                  | .                  | .            | . | .      |
| Vv05g0606          | Tc04_g024260       | Gorai.006G242000.1 | Gorai.       | . | .      |
| 005G045200.1       | .                  | Vv07g0115          | .            | . | .      |
| Tc01_g028280       | .                  | Gorai.004G077500.1 | .            | . | .      |
| .                  | .                  | .                  | .            | . | .      |
| Vv05g0607          | .                  | .                  | .            | . | .      |
| Vv07g0114          | Tc01_g028290       | .                  | .            | . | Gorai. |
| 004G056000.1       | Gorai.004G217400.1 | .                  | .            | . | .      |
| .                  | .                  | .                  | .            | . | .      |
| Vv05g0608          | Tc04_g024280       | .                  | .            | . | Gorai. |
| 011G170100.1       | Vv07g0113          | .                  | .            | . | .      |
| .                  | .                  | .                  | .            | . | .      |
| .                  | .                  | .                  | .            | . | .      |
| Vv05g0609          | Tc04_g024300       | Gorai.006G242100.1 | .            | . | .      |
| Gorai.011G168700.1 | .                  | .                  | .            | . | .      |
| .                  | .                  | .                  | .            | . | .      |
| .                  | .                  | .                  | .            | . | .      |
| Vv05g0610          | Tc04_g024310       | .                  | .            | . | .      |
| Vv07g0094          | Tc01_g028330       | .                  | .            | . | .      |
| Gorai.004G077100.1 | .                  | .                  | .            | . | .      |
| .                  | .                  | .                  | .            | . | .      |
| Vv05g0611          | .                  | .                  | .            | . | .      |
| .                  | .                  | .                  | .            | . | .      |
| .                  | .                  | .                  | .            | . | .      |
| Vv05g0612          | .                  | .                  | .            | . | .      |
| .                  | .                  | .                  | .            | . | .      |
| .                  | .                  | .                  | .            | . | .      |
| Vv05g0613          | .                  | .                  | .            | . | .      |
| .                  | .                  | .                  | .            | . | .      |
| .                  | .                  | .                  | .            | . | .      |
| Vv05g0614          | Tc04_g024340       | Gorai.006G242400.1 | .            | . | .      |
| Gorai.011G168400.1 | .                  | Vv07g0088          | .            | . | .      |
| Tc01_g028390       | Gorai.007G139600.1 | .                  | .            | . | Gorai. |
| 004G076900.1       | .                  | .                  | .            | . | .      |
| .                  | .                  | .                  | .            | . | .      |
| Vv05g0615          | Tc04_g024350       | Gorai.006G242500.1 | .            | . | .      |

|                    |                    |                    |                    |   |   |   |
|--------------------|--------------------|--------------------|--------------------|---|---|---|
| .                  | .                  | .                  | .                  | . | . | . |
| .                  | .                  | .                  | .                  | . | . | . |
| Vv05g0616          | Tc04_g024370       | Gorai.006G242700.1 | .                  | . | . | . |
| .                  | .                  | .                  | .                  | . | . | . |
| .                  | .                  | .                  | .                  | . | . | . |
| Vv05g0617          | .                  | .                  | .                  | . | . | . |
| .                  | .                  | .                  | .                  | . | . | . |
| .                  | .                  | .                  | .                  | . | . | . |
| Vv05g0618          | .                  | .                  | .                  | . | . | . |
| .                  | .                  | .                  | .                  | . | . | . |
| .                  | .                  | .                  | .                  | . | . | . |
| Vv05g0619          | Tc04_g024410       | Gorai.006G242800.1 | Gorai.             | . | . | . |
| 005G045500.1       | .                  | .                  | .                  | . | . | . |
| .                  | .                  | Vv14g0622          | Gorai.             | . | . | . |
| 013G121000.1       | Gorai.007G282000.1 | .                  | .                  | . | . | . |
| Vv05g0620          | .                  | .                  | .                  | . | . | . |
| .                  | .                  | .                  | .                  | . | . | . |
| .                  | .                  | .                  | .                  | . | . | . |
| Vv05g0621          | Tc04_g024420       | Gorai.006G242900.1 | .                  | . | . | . |
| Gorai.011G168300.1 | .                  | Gorai.002G024500.1 | Vv07g0085          | . | . | . |
| Tc01_g028460       | .                  | .                  | .                  | . | . | . |
| .                  | .                  | .                  | .                  | . | . | . |
| Vv05g0622          | Tc04_g024430       | .                  | Gorai.006G069700.1 | . | . | . |
| Gorai.011G166300.1 | .                  | Gorai.002G024600.1 | .                  | . | . | . |
| .                  | .                  | .                  | .                  | . | . | . |
| .                  | .                  | .                  | .                  | . | . | . |
| Vv05g0623          | .                  | .                  | .                  | . | . | . |
| .                  | .                  | .                  | .                  | . | . | . |
| .                  | .                  | .                  | .                  | . | . | . |
| Vv05g0624          | Tc04_g024440       | Gorai.006G243000.1 | Gorai.             | . | . | . |
| 005G045700.1       | .                  | .                  | .                  | . | . | . |
| .                  | .                  | .                  | .                  | . | . | . |
| .                  | .                  | .                  | .                  | . | . | . |
| Vv05g0625          | Tc04_g024450       | .                  | Gorai.             | . | . | . |
| 011G166400.1       | .                  | .                  | .                  | . | . | . |
| .                  | .                  | .                  | .                  | . | . | . |
| Vv05g0626          | Tc04_g003600       | Gorai.006G243200.1 | .                  | . | . | . |
| Gorai.011G166600.1 | .                  | .                  | .                  | . | . | . |
| .                  | .                  | .                  | .                  | . | . | . |
| .                  | .                  | .                  | .                  | . | . | . |
| Vv05g0627          | .                  | .                  | .                  | . | . | . |
| .                  | .                  | .                  | .                  | . | . | . |
| .                  | .                  | .                  | .                  | . | . | . |
| Vv05g0628          | .                  | .                  | .                  | . | . | . |
| .                  | .                  | .                  | .                  | . | . | . |
| .                  | .                  | .                  | .                  | . | . | . |
| Vv05g0629          | Gorai.006G243400.1 | Gorai.005G045800.1 | .                  | . | . | . |
| .                  | .                  | .                  | .                  | . | . | . |
| .                  | .                  | .                  | .                  | . | . | . |
| .                  | .                  | .                  | .                  | . | . | . |

|           |              |                    |                    |   |   |           |   |
|-----------|--------------|--------------------|--------------------|---|---|-----------|---|
| Vv05g0630 | .            | .                  | .                  | . | . | .         | . |
| .         | .            | .                  | .                  | . | . | .         | . |
| Vv05g0631 | .            | .                  | .                  | . | . | .         | . |
| .         | .            | .                  | .                  | . | . | .         | . |
| Vv05g0632 | .            | .                  | .                  | . | . | .         | . |
|           | Tc05_g017380 | .                  | Gorai.007G279900.1 | . | . | Vv14g0626 | . |
| .         | .            | .                  | .                  | . | . | .         | . |
| Vv05g0633 | .            | .                  | .                  | . | . | .         | . |
| .         | .            | .                  | .                  | . | . | .         | . |
| Vv05g0634 | .            | .                  | .                  | . | . | .         | . |
| .         | .            | .                  | .                  | . | . | .         | . |
| Vv05g0635 | .            | .                  | .                  | . | . | .         | . |
| .         | .            | .                  | .                  | . | . | .         | . |
| Vv05g0636 | .            | .                  | .                  | . | . | .         | . |
| .         | .            | .                  | .                  | . | . | .         | . |
| Vv05g0637 | .            | .                  | .                  | . | . | .         | . |
| .         | .            | .                  | .                  | . | . | .         | . |
| Vv05g0638 | .            | .                  | .                  | . | . | .         | . |
| .         | .            | .                  | .                  | . | . | .         | . |
| Vv05g0639 | .            | .                  | .                  | . | . | .         | . |
| .         | .            | .                  | .                  | . | . | .         | . |
| Vv05g0640 | .            | .                  | .                  | . | . | .         | . |
| .         | .            | .                  | .                  | . | . | .         | . |
| Vv05g0641 | .            | Gorai.006G243500.1 | .                  | . | . | .         | . |
| .         | .            | .                  | .                  | . | . | .         | . |
|           | Vv14g0627    | .                  | .                  | . | . | .         | . |
| Vv05g0642 | .            | .                  | .                  | . | . | .         | . |
| .         | .            | .                  | .                  | . | . | Vv14g0628 | . |
| .         | .            | .                  | .                  | . | . | .         | . |
| Vv05g0643 | .            | .                  | .                  | . | . | .         | . |
| .         | .            | .                  | .                  | . | . | .         | . |
| Vv05g0644 | .            | .                  | .                  | . | . | .         | . |
| .         | .            | .                  | .                  | . | . | .         | . |
| Vv05g0645 | .            | .                  | .                  | . | . | .         | . |
| .         | .            | .                  | .                  | . | . | .         | . |
| Vv05g0646 | .            | .                  | .                  | . | . | .         | . |

|                    |              |                    |        |   |   |   |   |
|--------------------|--------------|--------------------|--------|---|---|---|---|
| Vv05g0647          | .            | .                  | .      | . | . | . | . |
| Vv05g0648          | .            | .                  | .      | . | . | . | . |
| Vv05g0649          | .            | .                  | .      | . | . | . | . |
| Vv05g0650          | .            | .                  | .      | . | . | . | . |
| Vv05g0651          | .            | .                  | .      | . | . | . | . |
| Vv05g0652          | .            | .                  | .      | . | . | . | . |
| Vv05g0653          | Tc04_g003530 | Gorai.006G243600.1 | Gorai. | . | . | . | . |
| 005G046000.1       | .            | Gorai.011G166700.1 | .      | . | . | . | . |
| Vv05g0654          | .            | Gorai.005G046100.1 | .      | . | . | . | . |
| Gorai.011G166800.1 | .            | Vv07g0076          | Gorai. | . | . | . | . |
| 007G140400.1       | .            | Gorai.004G076300.1 | .      | . | . | . | . |
| Vv05g0655          | .            | .                  | .      | . | . | . | . |
| Vv05g0656          | .            | Gorai.006G243700.1 | .      | . | . | . | . |
| Vv05g0657          | .            | .                  | .      | . | . | . | . |
| Vv05g0658          | .            | Gorai.006G244200.1 | .      | . | . | . | . |
| Vv05g0659          | Tc04_g001110 | Gorai.006G244300.1 | .      | . | . | . | . |
| Gorai.011G167100.1 | .            | .                  | .      | . | . | . | . |
| Vv05g0660          | .            | .                  | .      | . | . | . | . |
| Vv05g0661          | .            | Gorai.006G244400.1 | .      | . | . | . | . |
| Gorai.011G167200.1 | .            | Vv07g0071          | .      | . | . | . | . |
| .                  | .            | Gorai.004G218100.1 | .      | . | . | . | . |

|                    |                    |                    |                    |                    |                    |   |
|--------------------|--------------------|--------------------|--------------------|--------------------|--------------------|---|
| Vv05g0662          | .                  | .                  | Gorai.006G244800.1 | .                  | .                  | . |
| .                  | .                  | Vv07g0070          | .                  | .                  | Gorai.001G242200.1 | . |
| .                  | .                  | Gorai.004G075500.1 | .                  | Gorai.004G218200.1 | .                  | . |
| Vv05g0663          | .                  | .                  | .                  | .                  | .                  | . |
| .                  | .                  | .                  | .                  | .                  | .                  | . |
| .                  | .                  | .                  | .                  | .                  | Vv14g0636          | . |
| .                  | Tc04_g020510       | .                  | Gorai.013G120800.1 | .                  | .                  | . |
| Vv05g0664          | .                  | .                  | .                  | .                  | Gorai.011G167300.1 | . |
| .                  | .                  | .                  | .                  | .                  | .                  | . |
| .                  | .                  | .                  | .                  | .                  | .                  | . |
| Vv05g0665          | Tc04_g024460       | .                  | Gorai.006G245000.1 | .                  | .                  | . |
| Gorai.006G069800.1 | .                  | Gorai.011G165200.1 | .                  | .                  | Vv07g0068          | . |
| .                  | .                  | .                  | .                  | .                  | .                  | . |
| .                  | .                  | .                  | .                  | .                  | .                  | . |
| Vv05g0666          | .                  | .                  | .                  | .                  | .                  | . |
| .                  | .                  | .                  | .                  | .                  | .                  | . |
| .                  | .                  | .                  | .                  | .                  | .                  | . |
| Vv05g0667          | Tc04_g024480       | .                  | .                  | .                  | .                  | . |
| .                  | .                  | .                  | .                  | .                  | .                  | . |
| .                  | .                  | .                  | .                  | .                  | .                  | . |
| Vv05g0668          | .                  | .                  | Gorai.006G245100.1 | .                  | .                  | . |
| .                  | .                  | .                  | .                  | .                  | .                  | . |
| .                  | .                  | .                  | .                  | .                  | .                  | . |
| Vv05g0669          | Tc04_g024510       | .                  | Gorai.006G245200.1 | .                  | Gorai.             | . |
| 005G046300.1       | .                  | .                  | .                  | .                  | .                  | . |
| .                  | .                  | .                  | .                  | .                  | .                  | . |
| .                  | .                  | .                  | .                  | .                  | .                  | . |
| Vv05g0670          | Tc04_g024520       | .                  | Gorai.006G245300.1 | .                  | .                  | . |
| .                  | .                  | .                  | .                  | .                  | .                  | . |
| .                  | .                  | .                  | .                  | .                  | .                  | . |
| Vv05g0671          | Tc04_g024530       | .                  | Gorai.006G245500.1 | .                  | .                  | . |
| .                  | .                  | .                  | .                  | .                  | .                  | . |
| .                  | .                  | .                  | .                  | .                  | .                  | . |
| Vv05g0672          | Tc04_g024540       | .                  | .                  | .                  | Gorai.             | . |
| 011G164700.1       | .                  | .                  | .                  | .                  | .                  | . |
| .                  | .                  | .                  | .                  | .                  | .                  | . |
| Vv05g0673          | Tc04_g024550       | .                  | Gorai.006G245600.1 | .                  | .                  | . |
| .                  | .                  | .                  | .                  | .                  | .                  | . |
| .                  | .                  | .                  | .                  | .                  | .                  | . |
| Vv05g0674          | .                  | .                  | .                  | .                  | .                  | . |
| .                  | .                  | .                  | .                  | .                  | .                  | . |
| .                  | .                  | .                  | .                  | .                  | .                  | . |
| Vv05g0675          | Tc04_g024560       | .                  | Gorai.006G245700.1 | .                  | .                  | . |
| Gorai.006G070000.1 | .                  | Gorai.011G161700.1 | .                  | .                  | .                  | . |
| .                  | .                  | .                  | .                  | .                  | .                  | . |
| .                  | .                  | .                  | .                  | .                  | .                  | . |
| Vv05g0676          | Tc04_g024570       | .                  | .                  | .                  | Gorai.006G070100.1 | . |
| .                  | Gorai.011G170500.1 | .                  | .                  | .                  | .                  | . |

|                    |                    |                    |                    |                    |   |   |   |
|--------------------|--------------------|--------------------|--------------------|--------------------|---|---|---|
| .                  | .                  | .                  | .                  | .                  | . | . | . |
| .                  | .                  | .                  | .                  | .                  | . | . | . |
| Vv05g0677          | .                  | Gorai.006G245800.1 | .                  | .                  | . | . | . |
| .                  | .                  | .                  | .                  | .                  | . | . | . |
| .                  | .                  | .                  | .                  | .                  | . | . | . |
| Vv05g0678          | Tc04_g024580       | .                  | .                  | Gorai.006G070200.1 | . | . | . |
| .                  | .                  | .                  | .                  | .                  | . | . | . |
| .                  | .                  | .                  | .                  | .                  | . | . | . |
| Vv05g0679          | Tc04_g024590       | Gorai.006G245900.1 | .                  | Gorai.             | . | . | . |
| 005G046400.1       | .                  | .                  | Vv07g0049          | .                  | . | . | . |
| Gorai.007G141900.1 | .                  | Gorai.001G242800.1 | .                  | Gorai.             | . | . | . |
| 004G075000.1       | .                  | Vv14g0651          | Tc04_g024590       | .                  | . | . | . |
| .                  | Gorai.007G141900.1 | .                  | .                  | .                  | . | . | . |
| Vv05g0680          | Tc04_g024600       | Gorai.006G246000.1 | .                  | Gorai.             | . | . | . |
| 005G046500.1       | .                  | Gorai.011G170700.1 | .                  | Vv07g0048          | . | . | . |
| .                  | .                  | Gorai.001G242900.1 | .                  | .                  | . | . | . |
| .                  | .                  | .                  | .                  | .                  | . | . | . |
| Vv05g0681          | Tc04_g024620       | .                  | Gorai.005G046600.1 | .                  | . | . | . |
| .                  | .                  | .                  | .                  | .                  | . | . | . |
| .                  | .                  | .                  | .                  | .                  | . | . | . |
| Vv05g0682          | Tc04_g024640       | Gorai.006G246100.1 | .                  | .                  | . | . | . |
| .                  | .                  | .                  | .                  | .                  | . | . | . |
| .                  | .                  | .                  | .                  | .                  | . | . | . |
| Vv05g0683          | .                  | .                  | .                  | .                  | . | . | . |
| .                  | .                  | .                  | .                  | .                  | . | . | . |
| .                  | .                  | .                  | .                  | .                  | . | . | . |
| Vv05g0684          | Tc04_g024650       | .                  | .                  | Gorai.             | . | . | . |
| 011G170800.1       | .                  | Vv07g0030          | .                  | .                  | . | . | . |
| .                  | Gorai.004G074400.1 | .                  | .                  | .                  | . | . | . |
| .                  | .                  | .                  | .                  | .                  | . | . | . |
| Vv05g0685          | Tc04_g024660       | .                  | .                  | .                  | . | . | . |
| .                  | .                  | .                  | .                  | .                  | . | . | . |
| .                  | .                  | .                  | .                  | .                  | . | . | . |
| Vv05g0686          | .                  | .                  | .                  | .                  | . | . | . |
| Vv07g0028          | .                  | Gorai.007G142500.1 | .                  | .                  | . | . | . |
| Gorai.004G074300.1 | .                  | .                  | .                  | .                  | . | . | . |
| .                  | .                  | .                  | .                  | .                  | . | . | . |
| Vv05g0687          | Tc04_g024720       | Gorai.006G246300.1 | .                  | .                  | . | . | . |
| .                  | .                  | .                  | .                  | .                  | . | . | . |
| .                  | .                  | .                  | .                  | .                  | . | . | . |
| Vv05g0688          | Tc04_g024730       | .                  | .                  | Gorai.             | . | . | . |
| 011G170900.1       | .                  | .                  | .                  | .                  | . | . | . |
| .                  | .                  | .                  | .                  | .                  | . | . | . |
| .                  | .                  | .                  | .                  | .                  | . | . | . |
| Vv05g0689          | .                  | .                  | .                  | .                  | . | . | . |
| .                  | .                  | .                  | .                  | .                  | . | . | . |
| .                  | .                  | .                  | .                  | .                  | . | . | . |
| Vv05g0690          | Tc04_g024740       | Gorai.006G246400.1 | .                  | Gorai.             | . | . | . |
| 005G046700.1       | .                  | .                  | .                  | .                  | . | . | . |
| .                  | .                  | .                  | .                  | .                  | . | . | . |
| .                  | .                  | .                  | .                  | .                  | . | . | . |

|              |                    |                    |   |   |   |                    |   |
|--------------|--------------------|--------------------|---|---|---|--------------------|---|
| Vv05g0691    | .                  | .                  | . | . | . | .                  | . |
| .            | .                  | .                  | . | . | . | .                  | . |
| Vv05g0692    | Tc04_g024750       | Gorai.006G246500.1 | . | . | . | Gorai.             | . |
| 005G046800.1 | .                  | Gorai.011G171000.1 | . | . | . | Vv07g0022          | . |
| .            | .                  | .                  | . | . | . | .                  | . |
| Vv05g0693    | .                  | .                  | . | . | . | .                  | . |
| Vv07g0019    | .                  | .                  | . | . | . | .                  | . |
| .            | .                  | .                  | . | . | . | .                  | . |
| Vv05g0694    | Tc04_g000930       | .                  | . | . | . | .                  | . |
| .            | .                  | .                  | . | . | . | .                  | . |
| Vv05g0695    | .                  | .                  | . | . | . | .                  | . |
| .            | .                  | .                  | . | . | . | .                  | . |
| Vv05g0696    | Tc04_g024760       | .                  | . | . | . | Gorai.             | . |
| 011G171100.1 | .                  | Vv07g0018          | . | . | . | .                  | . |
| .            | Gorai.004G074100.1 | .                  | . | . | . | .                  | . |
| Vv05g0697    | .                  | Gorai.006G246600.1 | . | . | . | .                  | . |
| .            | .                  | .                  | . | . | . | .                  | . |
| Vv05g0698    | .                  | .                  | . | . | . | .                  | . |
| .            | .                  | .                  | . | . | . | .                  | . |
| Vv05g0699    | .                  | Gorai.006G246800.1 | . | . | . | .                  | . |
| .            | .                  | .                  | . | . | . | .                  | . |
| Vv05g0700    | Tc04_g024790       | .                  | . | . | . | Gorai.006G070300.1 | . |
| .            | Gorai.002G024700.1 | .                  | . | . | . | .                  | . |
| .            | .                  | .                  | . | . | . | .                  | . |
| Vv05g0701    | .                  | .                  | . | . | . | .                  | . |
| .            | .                  | .                  | . | . | . | .                  | . |
| Vv05g0702    | .                  | .                  | . | . | . | .                  | . |
| .            | .                  | .                  | . | . | . | .                  | . |
| Vv05g0703    | Tc04_g024810       | .                  | . | . | . | Gorai.005G046900.1 | . |
| .            | .                  | .                  | . | . | . | .                  | . |
| Vv05g0704    | Tc04_g024820       | .                  | . | . | . | Gorai.006G070400.1 | . |
| .            | .                  | .                  | . | . | . | .                  | . |
| Vv05g0705    | .                  | .                  | . | . | . | .                  | . |
| .            | .                  | .                  | . | . | . | .                  | . |
| Vv05g0706    | Tc04_g024830       | .                  | . | . | . | Gorai.             | . |
| 011G171700.1 | .                  | .                  | . | . | . | .                  | . |

|           |                    |                    |                    |                    |   |   |
|-----------|--------------------|--------------------|--------------------|--------------------|---|---|
| Vv05g0707 | Tc04_g024840       | .                  | .                  | .                  | . | . |
| .         | .                  | .                  | .                  | .                  | . | . |
| Vv05g0708 | .                  | .                  | .                  | .                  | . | . |
| .         | .                  | .                  | .                  | .                  | . | . |
| Vv05g0709 | .                  | .                  | .                  | .                  | . | . |
| .         | .                  | .                  | .                  | .                  | . | . |
| Vv05g0710 | .                  | .                  | .                  | .                  | . | . |
| .         | .                  | .                  | .                  | .                  | . | . |
| Vv05g0711 | Tc04_g024860       | .                  | .                  | .                  | . | . |
| .         | .                  | .                  | .                  | .                  | . | . |
| Vv05g0712 | .                  | .                  | .                  | .                  | . | . |
| .         | .                  | .                  | .                  | .                  | . | . |
| Vv05g0713 | .                  | .                  | .                  | .                  | . | . |
| .         | .                  | .                  | .                  | .                  | . | . |
| Vv05g0714 | .                  | .                  | Gorai.005G047200.1 | .                  | . | . |
| .         | .                  | .                  | .                  | .                  | . | . |
| Vv05g0715 | Tc04_g024910       | .                  | .                  | .                  | . | . |
| .         | .                  | .                  | .                  | .                  | . | . |
| Vv05g0716 | .                  | .                  | .                  | .                  | . | . |
| .         | .                  | .                  | .                  | .                  | . | . |
| Vv05g0717 | .                  | Gorai.006G247200.1 | .                  | Gorai.005G047400.1 | . | . |
| .         | Gorai.011G171900.1 | .                  | .                  | .                  | . | . |
| .         | .                  | .                  | .                  | .                  | . | . |
| Vv05g0718 | .                  | .                  | .                  | .                  | . | . |
| .         | .                  | .                  | .                  | .                  | . | . |
| Vv05g0719 | .                  | .                  | .                  | .                  | . | . |
| .         | .                  | .                  | .                  | .                  | . | . |
| Vv05g0720 | .                  | .                  | .                  | .                  | . | . |
| .         | .                  | .                  | .                  | .                  | . | . |
| Vv05g0721 | .                  | .                  | .                  | .                  | . | . |
| .         | .                  | .                  | .                  | .                  | . | . |
| Vv05g0722 | .                  | .                  | .                  | .                  | . | . |
| .         | .                  | .                  | .                  | .                  | . | . |
| .         | .                  | .                  | .                  | .                  | . | . |



|                    |                    |                    |        |   |   |   |
|--------------------|--------------------|--------------------|--------|---|---|---|
| Vv05g0723          | Tc04_g024920       | .                  | .      | . | . | . |
| .                  | .                  | .                  | .      | . | . | . |
| Vv05g0724          | Tc04_g024930       | Gorai.006G247300.1 | .      | . | . | . |
| .                  | .                  | .                  | .      | . | . | . |
| Vv05g0725          | Tc04_g024950       | Gorai.006G247400.1 | .      | . | . | . |
| .                  | .                  | .                  | .      | . | . | . |
| Vv05g0726          | .                  | .                  | .      | . | . | . |
| .                  | .                  | .                  | .      | . | . | . |
| Vv05g0727          | Tc04_g024960       | .                  | .      | . | . | . |
| .                  | .                  | .                  | .      | . | . | . |
| Vv05g0728          | Tc04_g024970       | Gorai.006G247500.1 | Gorai. | . | . | . |
| 005G047700.1       | .                  | .                  | .      | . | . | . |
| .                  | .                  | .                  | .      | . | . | . |
| Vv05g0729          | Tc04_g024980       | Gorai.006G247600.1 | .      | . | . | . |
| .                  | .                  | .                  | .      | . | . | . |
| Vv05g0730          | Tc04_g024990       | Gorai.005G047800.1 | .      | . | . | . |
| Gorai.011G172000.1 | .                  | .                  | .      | . | . | . |
| .                  | .                  | .                  | .      | . | . | . |
| Vv05g0731          | Tc04_g025000       | Gorai.006G247700.1 | .      | . | . | . |
| .                  | .                  | .                  | .      | . | . | . |
| Vv05g0732          | .                  | .                  | .      | . | . | . |
| .                  | .                  | .                  | .      | . | . | . |
| Vv05g0733          | Tc04_g025010       | Gorai.006G247800.1 | Gorai. | . | . | . |
| 005G047900.1       | .                  | .                  | .      | . | . | . |
| .                  | .                  | .                  | .      | . | . | . |
| Vv05g0734          | Tc04_g025020       | Gorai.006G247900.1 | Gorai. | . | . | . |
| 005G048000.1       | .                  | .                  | .      | . | . | . |
| .                  | .                  | .                  | .      | . | . | . |
| Vv05g0735          | Tc04_g025040       | Gorai.006G248400.1 | Gorai. | . | . | . |
| 005G048100.1       | .                  | .                  | .      | . | . | . |
| .                  | .                  | .                  | .      | . | . | . |
| Vv05g0736          | Tc04_g025060       | Gorai.006G248700.1 | Gorai. | . | . | . |
| 005G048200.1       | Gorai.006G070500.1 | .                  | .      | . | . | . |
| .                  | .                  | .                  | .      | . | . | . |
| Vv05g0737          | Tc04_g025070       | Gorai.006G248800.1 | .      | . | . | . |
| .                  | .                  | .                  | .      | . | . | . |

|              |                    |                    |        |                    |        |   |   |
|--------------|--------------------|--------------------|--------|--------------------|--------|---|---|
| Vv05g0738    | .                  | .                  | .      | .                  | .      | . | . |
| .            | .                  | .                  | .      | .                  | .      | . | . |
| Vv05g0739    | .                  | .                  | .      | .                  | .      | . | . |
| .            | .                  | .                  | .      | .                  | .      | . | . |
| Vv05g0740    | Tc04_g025140       | Gorai.006G249000.1 | .      | .                  | .      | . | . |
| .            | .                  | .                  | .      | .                  | .      | . | . |
| Vv05g0741    | Tc04_g025150       | .                  | .      | Gorai.006G070600.1 | .      | . | . |
| .            | Gorai.011G172100.1 | .                  | .      | .                  | .      | . | . |
| .            | .                  | .                  | .      | .                  | .      | . | . |
| Vv05g0742    | Tc04_g025160       | .                  | .      | .                  | Gorai. | . | . |
| 011G172200.1 | .                  | .                  | .      | .                  | .      | . | . |
| .            | .                  | .                  | .      | .                  | .      | . | . |
| Vv05g0743    | .                  | .                  | .      | .                  | .      | . | . |
| .            | .                  | .                  | .      | .                  | .      | . | . |
| .            | .                  | .                  | .      | .                  | .      | . | . |
| Vv05g0744    | Tc04_g025170       | Gorai.006G249100.1 | Gorai. | .                  | .      | . | . |
| 005G048600.1 | Gorai.006G070900.1 | .                  | .      | .                  | .      | . | . |
| .            | .                  | .                  | .      | .                  | .      | . | . |
| .            | .                  | .                  | .      | .                  | .      | . | . |
| Vv05g0745    | .                  | .                  | .      | .                  | .      | . | . |
| .            | .                  | .                  | .      | .                  | .      | . | . |
| .            | .                  | .                  | .      | .                  | .      | . | . |
| Vv05g0746    | .                  | .                  | .      | .                  | .      | . | . |
| .            | .                  | .                  | .      | .                  | .      | . | . |
| .            | .                  | .                  | .      | .                  | .      | . | . |
| Vv05g0747    | Tc04_g025180       | .                  | .      | .                  | .      | . | . |
| .            | .                  | .                  | .      | .                  | .      | . | . |
| .            | .                  | .                  | .      | .                  | .      | . | . |
| Vv05g0748    | .                  | .                  | .      | .                  | .      | . | . |
| .            | .                  | .                  | .      | .                  | .      | . | . |
| .            | .                  | .                  | .      | .                  | .      | . | . |
| Vv05g0749    | Tc04_g025190       | Gorai.006G249200.1 | .      | .                  | .      | . | . |
| .            | .                  | .                  | .      | .                  | .      | . | . |
| .            | .                  | .                  | .      | .                  | .      | . | . |
| Vv05g0750    | .                  | .                  | .      | .                  | .      | . | . |
| .            | .                  | .                  | .      | .                  | .      | . | . |
| .            | .                  | .                  | .      | .                  | .      | . | . |
| Vv05g0751    | .                  | .                  | .      | .                  | .      | . | . |
| .            | .                  | .                  | .      | .                  | .      | . | . |
| .            | .                  | .                  | .      | .                  | .      | . | . |
| Vv05g0752    | .                  | .                  | .      | .                  | .      | . | . |
| .            | .                  | .                  | .      | .                  | .      | . | . |
| .            | .                  | .                  | .      | .                  | .      | . | . |
| Vv05g0753    | Tc04_g025200       | .                  | .      | .                  | .      | . | . |
| .            | .                  | .                  | .      | .                  | .      | . | . |

|                    |              |                    |   |   |   |   |
|--------------------|--------------|--------------------|---|---|---|---|
| Vv05g0754          | .            | .                  | . | . | . | . |
| .                  | .            | .                  | . | . | . | . |
| Vv05g0755          | Tc04_g025210 | Gorai.006G249300.1 | . | . | . | . |
| Gorai.006G071000.1 | .            | .                  | . | . | . | . |
| .                  | .            | .                  | . | . | . | . |
| Vv05g0756          | Tc04_g025220 | .                  | . | . | . | . |
| .                  | .            | .                  | . | . | . | . |
| Vv05g0757          | .            | .                  | . | . | . | . |
| .                  | .            | .                  | . | . | . | . |
| Vv05g0758          | Tc04_g025230 | Gorai.006G249400.1 | . | . | . | . |
| Gorai.006G071200.1 | .            | .                  | . | . | . | . |
| .                  | .            | .                  | . | . | . | . |
| Vv05g0759          | Tc04_g025240 | .                  | . | . | . | . |
| .                  | .            | .                  | . | . | . | . |
| Vv05g0760          | .            | .                  | . | . | . | . |
| .                  | .            | .                  | . | . | . | . |
| Vv05g0761          | Tc04_g025250 | Gorai.006G249500.1 | . | . | . | . |
| .                  | .            | .                  | . | . | . | . |
| Vv05g0762          | Tc04_g025260 | .                  | . | . | . | . |
| .                  | .            | .                  | . | . | . | . |
| Vv05g0763          | .            | .                  | . | . | . | . |
| .                  | .            | .                  | . | . | . | . |
| Vv05g0764          | Tc04_g025270 | Gorai.006G249600.1 | . | . | . | . |
| Gorai.006G071300.1 | .            | .                  | . | . | . | . |
| .                  | .            | .                  | . | . | . | . |
| Vv05g0765          | .            | .                  | . | . | . | . |
| .                  | .            | .                  | . | . | . | . |
| Vv05g0766          | Tc04_g025290 | Gorai.006G071500.1 | . | . | . | . |
| .                  | .            | .                  | . | . | . | . |
| Vv05g0767          | Tc04_g025300 | Gorai.006G071600.1 | . | . | . | . |
| .                  | .            | .                  | . | . | . | . |
| Vv05g0768          | Tc04_g025310 | Gorai.006G071700.1 | . | . | . | . |
| .                  | .            | .                  | . | . | . | . |
| Vv05g0769          | Tc04_g025320 | Gorai.005G048800.1 | . | . | . | . |

|                    |                    |                    |                    |   |   |   |
|--------------------|--------------------|--------------------|--------------------|---|---|---|
| Gorai.006G071900.1 | .                  | .                  | .                  | . | . | . |
| .                  | .                  | .                  | .                  | . | . | . |
| Vv05g0770          | .                  | .                  | .                  | . | . | . |
| .                  | .                  | .                  | .                  | . | . | . |
| Vv05g0771          | Tc04_g025330       | .                  | Gorai.005G048900.1 | . | . | . |
| .                  | .                  | .                  | .                  | . | . | . |
| Vv05g0772          | .                  | .                  | .                  | . | . | . |
| .                  | .                  | .                  | .                  | . | . | . |
| Vv05g0773          | Tc04_g025340       | .                  | Gorai.005G049000.1 | . | . | . |
| .                  | Vv07g0695          | .                  | Tc01_g033420       | . | . | . |
| Gorai.008G132500.1 | .                  | .                  | .                  | . | . | . |
| .                  | .                  | .                  | .                  | . | . | . |
| Vv05g0774          | .                  | .                  | .                  | . | . | . |
| .                  | .                  | .                  | .                  | . | . | . |
| Vv05g0775          | Tc04_g025360       | .                  | Gorai.006G072000.1 | . | . | . |
| .                  | .                  | .                  | .                  | . | . | . |
| Vv05g0776          | Tc04_g025370       | Gorai.006G249700.1 | Gorai.             | . | . | . |
| 005G049100.1       | .                  | .                  | .                  | . | . | . |
| .                  | .                  | .                  | .                  | . | . | . |
| Vv05g0777          | Tc04_g025390       | Gorai.006G249900.1 | .                  | . | . | . |
| .                  | .                  | .                  | .                  | . | . | . |
| Vv05g0778          | Tc04_g025400       | Gorai.006G250000.1 | Gorai.             | . | . | . |
| 005G049200.1       | Gorai.011G172800.1 | .                  | .                  | . | . | . |
| .                  | .                  | .                  | .                  | . | . | . |
| Vv05g0779          | .                  | .                  | .                  | . | . | . |
| .                  | .                  | .                  | .                  | . | . | . |
| Vv05g0780          | Tc04_g025410       | Gorai.006G250100.1 | Gorai.             | . | . | . |
| 005G049300.1       | Gorai.011G173000.1 | .                  | .                  | . | . | . |
| .                  | .                  | .                  | .                  | . | . | . |
| Vv05g0781          | .                  | .                  | .                  | . | . | . |
| .                  | .                  | .                  | .                  | . | . | . |
| Vv05g0782          | .                  | .                  | .                  | . | . | . |
| .                  | .                  | .                  | .                  | . | . | . |
| Vv05g0783          | .                  | .                  | .                  | . | . | . |
| .                  | .                  | .                  | .                  | . | . | . |
| Vv05g0784          | .                  | .                  | .                  | . | . | . |

|           |              |   |   |   |   |   |   |
|-----------|--------------|---|---|---|---|---|---|
| .         | .            | . | . | . | . | . | . |
| .         | .            | . | . | . | . | . | . |
| Vv05g0785 | Tc04_g025420 | . | . | . | . | . | . |
| .         | .            | . | . | . | . | . | . |
| Vv05g0786 | .            | . | . | . | . | . | . |
| .         | .            | . | . | . | . | . | . |
| Vv05g0787 | .            | . | . | . | . | . | . |
| .         | .            | . | . | . | . | . | . |
| Vv05g0788 | .            | . | . | . | . | . | . |
| .         | .            | . | . | . | . | . | . |
| Vv05g0789 | .            | . | . | . | . | . | . |
| .         | .            | . | . | . | . | . | . |
| Vv05g0790 | .            | . | . | . | . | . | . |
| .         | .            | . | . | . | . | . | . |
| Vv05g0791 | .            | . | . | . | . | . | . |
| .         | .            | . | . | . | . | . | . |
| Vv05g0792 | .            | . | . | . | . | . | . |
| .         | .            | . | . | . | . | . | . |
| Vv05g0793 | .            | . | . | . | . | . | . |
| .         | .            | . | . | . | . | . | . |
| Vv05g0794 | .            | . | . | . | . | . | . |
| .         | .            | . | . | . | . | . | . |
| Vv05g0795 | .            | . | . | . | . | . | . |
| .         | .            | . | . | . | . | . | . |
| Vv05g0796 | .            | . | . | . | . | . | . |
| .         | .            | . | . | . | . | . | . |
| Vv05g0797 | .            | . | . | . | . | . | . |
| .         | .            | . | . | . | . | . | . |
| Vv05g0798 | .            | . | . | . | . | . | . |
| .         | .            | . | . | . | . | . | . |
| Vv05g0799 | .            | . | . | . | . | . | . |
| .         | .            | . | . | . | . | . | . |
| Vv05g0800 | .            | . | . | . | . | . | . |
| .         | .            | . | . | . | . | . | . |
| .         | .            | . | . | . | . | . | . |

|              |              |   |                    |                    |        |   |   |
|--------------|--------------|---|--------------------|--------------------|--------|---|---|
| Vv05g0801    | .            | . | .                  | .                  | .      | . | . |
| .            | .            | . | .                  | .                  | .      | . | . |
| Vv05g0802    | .            | . | .                  | .                  | .      | . | . |
| .            | .            | . | .                  | .                  | .      | . | . |
| Vv05g0803    | .            | . | .                  | .                  | .      | . | . |
| .            | .            | . | .                  | .                  | .      | . | . |
| Vv05g0804    | .            | . | .                  | .                  | .      | . | . |
| .            | .            | . | .                  | .                  | .      | . | . |
| Vv05g0805    | .            | . | .                  | .                  | .      | . | . |
| .            | .            | . | .                  | .                  | .      | . | . |
| Vv05g0806    | .            | . | .                  | .                  | .      | . | . |
| .            | .            | . | .                  | .                  | .      | . | . |
| Vv05g0807    | .            | . | .                  | .                  | .      | . | . |
| .            | .            | . | .                  | .                  | .      | . | . |
| Vv05g0808    | .            | . | .                  | .                  | .      | . | . |
| .            | .            | . | .                  | .                  | .      | . | . |
| Vv05g0809    | .            | . | .                  | .                  | .      | . | . |
| .            | .            | . | .                  | .                  | .      | . | . |
| Vv05g0810    | .            | . | .                  | .                  | .      | . | . |
| .            | .            | . | .                  | .                  | .      | . | . |
| Vv05g0811    | Tc04_g025460 | . | Gorai.006G250300.1 | .                  | Gorai. | . | . |
| 005G049800.1 | .            | . | .                  | .                  | .      | . | . |
| .            | .            | . | .                  | .                  | .      | . | . |
| Vv05g0812    | Tc04_g001190 | . | .                  | .                  | .      | . | . |
| .            | .            | . | .                  | .                  | .      | . | . |
| Vv05g0813    | Tc04_g025470 | . | .                  | Gorai.006G072100.1 | .      | . | . |
| 007G146000.1 | Vv07g0717    | . | Tc01_g003460       | Gorai.             | .      | . | . |
| .            | .            | . | .                  | .                  | .      | . | . |
| Vv05g0814    | .            | . | Gorai.005G049900.1 | .                  | .      | . | . |
| .            | .            | . | .                  | .                  | .      | . | . |
| Vv05g0815    | .            | . | .                  | .                  | .      | . | . |
| .            | .            | . | .                  | .                  | .      | . | . |
| Vv05g0816    | Tc04_g025480 | . | .                  | .                  | .      | . | . |
| Vv07g0719    | .            | . | .                  | .                  | .      | . | . |
| .            | .            | . | .                  | .                  | .      | . | . |

|                    |              |                    |   |   |   |        |   |
|--------------------|--------------|--------------------|---|---|---|--------|---|
| Vv05g0817          | .            | .                  | . | . | . | .      | . |
| .                  | .            | .                  | . | . | . | .      | . |
| .                  | .            | .                  | . | . | . | .      | . |
| Vv05g0818          | Tc04_g025500 | .                  | . | . | . | Gorai. | . |
| 011G173700.1       | .            | .                  | . | . | . | .      | . |
| .                  | .            | .                  | . | . | . | .      | . |
| Vv05g0819          | Tc04_g025510 | Gorai.006G253700.1 | . | . | . | Gorai. | . |
| 005G050000.1       | .            | .                  | . | . | . | .      | . |
| .                  | .            | .                  | . | . | . | .      | . |
| .                  | .            | .                  | . | . | . | .      | . |
| Vv05g0820          | .            | .                  | . | . | . | .      | . |
| .                  | .            | .                  | . | . | . | .      | . |
| .                  | .            | .                  | . | . | . | .      | . |
| Vv05g0821          | .            | .                  | . | . | . | .      | . |
| .                  | .            | .                  | . | . | . | .      | . |
| .                  | .            | .                  | . | . | . | .      | . |
| Vv05g0822          | .            | .                  | . | . | . | .      | . |
| .                  | .            | .                  | . | . | . | .      | . |
| .                  | .            | .                  | . | . | . | .      | . |
| Vv05g0823          | .            | Gorai.005G050100.1 | . | . | . | .      | . |
| .                  | Vv07g0721    | .                  | . | . | . | .      | . |
| Gorai.004G220900.1 | .            | .                  | . | . | . | .      | . |
| .                  | .            | .                  | . | . | . | .      | . |
| Vv05g0824          | Tc04_g001100 | .                  | . | . | . | .      | . |
| .                  | .            | .                  | . | . | . | .      | . |
| .                  | .            | .                  | . | . | . | .      | . |
| Vv05g0825          | .            | .                  | . | . | . | .      | . |
| .                  | .            | .                  | . | . | . | .      | . |
| .                  | .            | .                  | . | . | . | .      | . |
| Vv05g0826          | .            | .                  | . | . | . | .      | . |
| .                  | .            | .                  | . | . | . | .      | . |
| .                  | .            | .                  | . | . | . | .      | . |
| Vv05g0827          | .            | Gorai.005G050300.1 | . | . | . | .      | . |
| Gorai.011G174300.1 | .            | .                  | . | . | . | .      | . |
| .                  | .            | .                  | . | . | . | .      | . |
| .                  | .            | .                  | . | . | . | .      | . |
| Vv05g0828          | .            | .                  | . | . | . | .      | . |
| .                  | .            | .                  | . | . | . | .      | . |
| .                  | .            | .                  | . | . | . | .      | . |
| Vv05g0829          | Tc04_g025560 | Gorai.005G037900.1 | . | . | . | .      | . |
| .                  | .            | .                  | . | . | . | .      | . |
| .                  | .            | .                  | . | . | . | .      | . |
| Vv05g0830          | .            | .                  | . | . | . | .      | . |
| .                  | .            | .                  | . | . | . | .      | . |
| .                  | .            | .                  | . | . | . | .      | . |
| Vv05g0831          | .            | Gorai.005G037800.1 | . | . | . | .      | . |
| .                  | .            | .                  | . | . | . | .      | . |
| .                  | .            | .                  | . | . | . | .      | . |
| Vv05g0832          | Tc04_g025570 | Gorai.005G037700.1 | . | . | . | .      | . |
| .                  | .            | .                  | . | . | . | .      | . |

|                    |                    |                    |                    |                    |        |   |
|--------------------|--------------------|--------------------|--------------------|--------------------|--------|---|
| Vv05g0833          | Tc04_g025600       | .                  | .                  | .                  | .      | . |
| Gorai.002G025400.1 | .                  | .                  | .                  | .                  | .      | . |
| Vv05g0834          | .                  | .                  | Gorai.005G036300.1 | .                  | .      | . |
| .                  | .                  | .                  | .                  | .                  | .      | . |
| Vv05g0835          | .                  | .                  | .                  | .                  | Gorai. | . |
| 002G025500.1       | .                  | .                  | .                  | .                  | .      | . |
| Vv05g0836          | Tc04_g025610       | Gorai.006G253400.1 | .                  | Gorai.             | .      | . |
| 005G033800.1       | .                  | Gorai.002G025600.1 | .                  | .                  | .      | . |
| .                  | .                  | .                  | .                  | .                  | .      | . |
| Vv05g0837          | .                  | .                  | .                  | .                  | .      | . |
| .                  | .                  | .                  | .                  | .                  | .      | . |
| Vv05g0838          | Tc04_g025620       | .                  | .                  | Gorai.             | .      | . |
| 011G174600.1       | .                  | .                  | .                  | .                  | .      | . |
| Vv05g0839          | Tc04_g025630       | Gorai.006G253300.1 | .                  | Gorai.             | .      | . |
| 005G050400.1       | .                  | Gorai.011G174900.1 | .                  | Vv07g0744          | .      | . |
| .                  | Gorai.007G147000.1 | .                  | .                  | .                  | .      | . |
| Gorai.004G221200.1 | .                  | .                  | .                  | .                  | .      | . |
| Vv05g0840          | .                  | .                  | .                  | .                  | .      | . |
| .                  | .                  | .                  | .                  | .                  | .      | . |
| Vv05g0841          | Tc04_g025640       | .                  | Gorai.005G050500.1 | .                  | .      | . |
| Gorai.011G175000.1 | .                  | Gorai.005G050500.1 | .                  | Vv07g0751          | .      | . |
| Tc01_g025360       | .                  | .                  | .                  | .                  | .      | . |
| .                  | .                  | .                  | .                  | .                  | .      | . |
| Vv05g0842          | .                  | .                  | .                  | .                  | .      | . |
| .                  | .                  | .                  | .                  | .                  | .      | . |
| Vv05g0843          | .                  | .                  | .                  | .                  | .      | . |
| .                  | .                  | .                  | .                  | .                  | .      | . |
| Vv05g0844          | Tc04_g025650       | Gorai.006G253200.1 | .                  | Gorai.             | .      | . |
| 005G050600.1       | .                  | Gorai.011G175100.1 | .                  | .                  | .      | . |
| .                  | .                  | .                  | .                  | .                  | .      | . |
| Vv05g0845          | Tc04_g025680       | .                  | .                  | .                  | .      | . |
| .                  | .                  | .                  | .                  | .                  | .      | . |
| Vv05g0846          | .                  | .                  | .                  | .                  | .      | . |
| .                  | .                  | .                  | .                  | .                  | .      | . |
| Vv05g0847          | .                  | Gorai.006G253000.1 | .                  | Gorai.005G050700.1 | .      | . |
| .                  | Gorai.011G175500.1 | .                  | .                  | .                  | .      | . |



|              |                    |                    |   |                    |        |   |   |
|--------------|--------------------|--------------------|---|--------------------|--------|---|---|
| .            | .                  | .                  | . | .                  | .      | . | . |
| .            | .                  | .                  | . | .                  | .      | . | . |
| Vv05g0848    | .                  | .                  | . | .                  | .      | . | . |
| .            | .                  | .                  | . | .                  | .      | . | . |
| Vv05g0849    | .                  | .                  | . | .                  | .      | . | . |
| .            | .                  | .                  | . | .                  | .      | . | . |
| Vv05g0850    | .                  | .                  | . | .                  | .      | . | . |
| .            | .                  | .                  | . | .                  | .      | . | . |
| Vv05g0851    | .                  | .                  | . | .                  | .      | . | . |
| .            | .                  | .                  | . | .                  | .      | . | . |
| Vv05g0852    | Tc04_g025740       | Gorai.006G252900.1 |   | Gorai.             |        |   |   |
| 005G050900.1 | .                  | .                  | . | .                  | .      | . | . |
| .            | .                  | .                  | . | .                  | .      | . | . |
| Vv05g0853    | Tc04_g025750       | Gorai.006G252800.1 |   | .                  |        | . | . |
| .            | .                  | .                  | . | .                  | .      | . | . |
| .            | Vv11g0327          | Tc09_g009000       | . | .                  | .      | . | . |
| .            | Gorai.010G076700.1 |                    |   | .                  | .      | . | . |
| Vv05g0854    | Tc04_g025770       | Gorai.006G252700.1 |   | Gorai.             |        |   |   |
| 005G051000.1 | Gorai.006G072600.1 | .                  |   | Gorai.002G025700.1 |        |   |   |
| .            | .                  | .                  | . | .                  | .      | . | . |
| Vv05g0855    | Tc04_g025790       | .                  | . | .                  | Gorai. |   |   |
| 011G176000.1 | .                  | .                  | . | .                  | .      | . | . |
| .            | .                  | .                  | . | .                  | .      | . | . |
| Vv05g0856    | .                  | .                  | . | .                  | .      | . | . |
| .            | .                  | .                  | . | .                  | .      | . | . |
| Vv05g0857    | Tc04_g025800       | .                  |   | Gorai.005G051100.1 |        | . |   |
|              | Gorai.011G176400.1 | .                  | . | .                  | .      | . | . |
| .            | .                  | .                  | . | .                  | .      | . | . |
| Vv05g0858    | Tc04_g025810       | .                  | . | .                  | Gorai. |   |   |
| 011G176800.1 | .                  | Vv07g0762          |   | Tc01_g025530       | Gorai. |   |   |
| 007G148100.1 | .                  | .                  | . | .                  | .      | . | . |
| .            | .                  | .                  | . | .                  | .      | . | . |
| Vv05g0859    | Tc04_g025820       | .                  |   | Gorai.005G051200.1 |        | . |   |
|              | Gorai.011G176900.1 | .                  | . | .                  | .      | . | . |
| .            | .                  | .                  | . | .                  | .      | . | . |
| Vv05g0860    | Tc04_g025830       | Gorai.006G252600.1 |   | .                  |        | . |   |
| .            | .                  | .                  | . | .                  | .      | . | . |
| Vv05g0861    | .                  | .                  | . | .                  | .      | . | . |
| .            | .                  | .                  | . | .                  | .      | . | . |
| .            | .                  | .                  | . | .                  | .      | . | . |

|                    |                    |                    |                    |   |   |   |   |
|--------------------|--------------------|--------------------|--------------------|---|---|---|---|
| Vv05g0862          | .                  | .                  | .                  | . | . | . | . |
| .                  | .                  | .                  | .                  | . | . | . | . |
| Vv05g0863          | Tc04_g025840       | .                  | Gorai.005G051300.1 | . | . | . | . |
| .                  | .                  | .                  | .                  | . | . | . | . |
| Vv05g0864          | Tc04_g025850       | Gorai.006G252500.1 | .                  | . | . | . | . |
| Gorai.011G177100.1 | .                  | Vv07g0766          | .                  | . | . | . | . |
| Tc01_g025580       | .                  | .                  | .                  | . | . | . | . |
| .                  | .                  | .                  | .                  | . | . | . | . |
| Vv05g0865          | Tc04_g025860       | Gorai.005G051400.1 | .                  | . | . | . | . |
| Gorai.011G177200.1 | .                  | .                  | .                  | . | . | . | . |
| .                  | .                  | .                  | .                  | . | . | . | . |
| Vv05g0866          | .                  | .                  | .                  | . | . | . | . |
| .                  | .                  | .                  | .                  | . | . | . | . |
| Vv05g0867          | Tc04_g025890       | Gorai.006G252300.1 | .                  | . | . | . | . |
| .                  | .                  | .                  | .                  | . | . | . | . |
| Vv05g0868          | Tc04_g025900       | Gorai.006G252200.1 | Gorai.             | . | . | . | . |
| 005G051600.1       | .                  | Vv07g0770          | .                  | . | . | . | . |
| Tc01_g025610       | Gorai.007G148300.1 | .                  | .                  | . | . | . | . |
| Gorai.004G221900.1 | .                  | .                  | .                  | . | . | . | . |
| .                  | .                  | .                  | .                  | . | . | . | . |
| Vv05g0869          | .                  | .                  | .                  | . | . | . | . |
| .                  | .                  | .                  | .                  | . | . | . | . |
| Vv05g0870          | Tc04_g025920       | Gorai.005G051900.1 | .                  | . | . | . | . |
| .                  | Vv07g0772          | Tc01_g025620       | Gorai.             | . | . | . | . |
| 007G148500.1       | .                  | Gorai.004G222000.1 | .                  | . | . | . | . |
| Vv11g0335          | Tc09_g009100       | .                  | Gorai.             | . | . | . | . |
| 009G027300.1       | .                  | .                  | .                  | . | . | . | . |
| Vv05g0871          | .                  | .                  | .                  | . | . | . | . |
| .                  | .                  | .                  | .                  | . | . | . | . |
| Vv05g0872          | .                  | .                  | .                  | . | . | . | . |
| .                  | .                  | .                  | .                  | . | . | . | . |
| Vv05g0873          | Tc04_g025930       | Gorai.005G052000.1 | .                  | . | . | . | . |
| Gorai.011G177300.1 | .                  | .                  | .                  | . | . | . | . |
| .                  | .                  | .                  | .                  | . | . | . | . |
| Vv05g0874          | Tc04_g025940       | .                  | Gorai.             | . | . | . | . |
| 011G177400.1       | .                  | .                  | .                  | . | . | . | . |
| .                  | .                  | .                  | .                  | . | . | . | . |
| Vv05g0875          | .                  | .                  | .                  | . | . | . | . |
| .                  | .                  | .                  | .                  | . | . | . | . |
| Vv05g0876          | Tc04_g025950       | Gorai.005G052100.1 | .                  | . | . | . | . |

|                    |                    |                    |                    |   |   |   |
|--------------------|--------------------|--------------------|--------------------|---|---|---|
| .                  | .                  | Vv07g0779          | .                  | . | . | . |
| .                  | .                  | .                  | .                  | . | . | . |
| Vv05g0877          | Tc04_g025960       | Gorai.006G252000.1 | .                  | . | . | . |
| .                  | .                  | .                  | .                  | . | . | . |
| Vv05g0878          | Tc04_g025970       | .                  | Gorai.005G052500.1 | . | . | . |
| .                  | Vv07g0783          | .                  | Tc01_g025680       | . | . | . |
| Gorai.001G238300.1 | .                  | .                  | .                  | . | . | . |
| .                  | .                  | .                  | .                  | . | . | . |
| Vv05g0879          | Tc04_g025980       | Gorai.006G251900.1 | Gorai.             | . | . | . |
| 005G052600.1       | .                  | .                  | .                  | . | . | . |
| .                  | .                  | Vv11g0340          | Tc09_g009150       | . | . | . |
| Gorai.013G219200.1 | Gorai.001G008200.1 | .                  | Gorai.             | . | . | . |
| 009G027200.1       | Gorai.010G075600.1 | .                  | .                  | . | . | . |
| Vv05g0880          | .                  | .                  | .                  | . | . | . |
| .                  | .                  | .                  | .                  | . | . | . |
| .                  | .                  | .                  | .                  | . | . | . |
| Vv05g0881          | .                  | .                  | .                  | . | . | . |
| .                  | .                  | .                  | .                  | . | . | . |
| .                  | .                  | .                  | .                  | . | . | . |
| Vv05g0882          | Tc04_g026000       | .                  | .                  | . | . | . |
| Gorai.002G025800.1 | .                  | .                  | .                  | . | . | . |
| .                  | .                  | .                  | .                  | . | . | . |
| Vv05g0883          | Tc04_g026020       | Gorai.006G251800.1 | .                  | . | . | . |
| .                  | .                  | .                  | .                  | . | . | . |
| .                  | .                  | .                  | .                  | . | . | . |
| Vv05g0884          | Tc04_g026050       | .                  | Gorai.005G052800.1 | . | . | . |
| .                  | .                  | .                  | .                  | . | . | . |
| .                  | .                  | .                  | .                  | . | . | . |
| Vv05g0885          | .                  | .                  | .                  | . | . | . |
| .                  | .                  | .                  | .                  | . | . | . |
| .                  | .                  | .                  | .                  | . | . | . |
| Vv05g0886          | Tc04_g026070       | .                  | Gorai.005G052900.1 | . | . | . |
| .                  | Gorai.002G026100.1 | .                  | .                  | . | . | . |
| .                  | .                  | .                  | .                  | . | . | . |
| .                  | .                  | .                  | .                  | . | . | . |
| Vv05g0887          | Tc04_g026090       | .                  | Gorai.005G053000.1 | . | . | . |
| .                  | .                  | .                  | .                  | . | . | . |
| .                  | .                  | .                  | .                  | . | . | . |
| Vv05g0888          | .                  | .                  | .                  | . | . | . |
| .                  | .                  | .                  | .                  | . | . | . |
| .                  | .                  | .                  | .                  | . | . | . |
| Vv05g0889          | .                  | .                  | .                  | . | . | . |
| .                  | .                  | .                  | .                  | . | . | . |
| .                  | .                  | .                  | .                  | . | . | . |
| Vv05g0890          | Tc04_g026110       | Gorai.006G251700.1 | .                  | . | . | . |
| .                  | .                  | .                  | .                  | . | . | . |
| .                  | .                  | .                  | .                  | . | . | . |
| Vv05g0891          | Tc04_g026130       | Gorai.006G251600.1 | .                  | . | . | . |

|                    |                    |                    |                    |                    |   |
|--------------------|--------------------|--------------------|--------------------|--------------------|---|
| .                  | Gorai.002G026400.1 | .                  | .                  | .                  | . |
| .                  | .                  | .                  | .                  | .                  | . |
| .                  | .                  | .                  | .                  | .                  | . |
| Vv05g0892          | Tc04_g026140       | .                  | Gorai.005G053200.1 | .                  | . |
| .                  | .                  | .                  | .                  | .                  | . |
| .                  | .                  | .                  | .                  | .                  | . |
| Vv05g0893          | Tc04_g026170       | .                  | .                  | Gorai.006G072700.1 | . |
| .                  | Gorai.011G178600.1 | .                  | .                  | .                  | . |
| .                  | .                  | .                  | .                  | .                  | . |
| .                  | .                  | .                  | .                  | .                  | . |
| Vv05g0894          | Tc04_g026210       | Gorai.006G251500.1 | .                  | Gorai.             | . |
| 005G053300.1       | .                  | .                  | Vv07g0801          | .                  | . |
| Tc01_g025870       | Gorai.007G149400.1 | .                  | .                  | .                  | . |
| .                  | .                  | .                  | .                  | .                  | . |
| Vv05g0895          | .                  | .                  | .                  | .                  | . |
| Vv07g0804          | Tc01_g025890       | Gorai.007G149600.1 | .                  | .                  | . |
| .                  | Gorai.004G222200.1 | .                  | .                  | .                  | . |
| .                  | .                  | .                  | .                  | .                  | . |
| Vv05g0896          | .                  | .                  | .                  | .                  | . |
| .                  | .                  | .                  | .                  | .                  | . |
| .                  | .                  | .                  | .                  | .                  | . |
| Vv05g0897          | Tc04_g026220       | Gorai.006G251400.1 | .                  | Gorai.             | . |
| 005G053400.1       | .                  | .                  | .                  | .                  | . |
| .                  | .                  | .                  | .                  | .                  | . |
| .                  | .                  | .                  | .                  | .                  | . |
| Vv05g0898          | Tc04_g026230       | .                  | Gorai.005G053500.1 | .                  | . |
| Gorai.006G073000.1 | .                  | .                  | .                  | .                  | . |
| .                  | .                  | .                  | .                  | .                  | . |
| .                  | .                  | .                  | .                  | .                  | . |
| Vv05g0899          | .                  | .                  | .                  | .                  | . |
| .                  | .                  | .                  | .                  | .                  | . |
| .                  | .                  | .                  | .                  | .                  | . |
| Vv05g0900          | .                  | .                  | .                  | .                  | . |
| .                  | .                  | .                  | .                  | .                  | . |
| .                  | .                  | .                  | .                  | .                  | . |
| Vv05g0901          | Tc04_g026240       | Gorai.006G251300.1 | .                  | Gorai.             | . |
| 005G053600.1       | .                  | Gorai.002G026500.1 | .                  | .                  | . |
| .                  | .                  | .                  | .                  | .                  | . |
| .                  | .                  | .                  | .                  | .                  | . |
| Vv05g0902          | Tc04_g026250       | Gorai.006G251200.1 | .                  | Gorai.             | . |
| 005G053700.1       | Gorai.006G073200.1 | .                  | .                  | .                  | . |
| .                  | .                  | .                  | .                  | .                  | . |
| .                  | .                  | .                  | .                  | .                  | . |
| Vv05g0903          | Tc04_g026260       | Gorai.006G251100.1 | .                  | .                  | . |
| .                  | .                  | .                  | .                  | .                  | . |
| .                  | .                  | .                  | .                  | .                  | . |
| Vv05g0904          | Tc04_g026280       | .                  | .                  | .                  | . |
| .                  | Vv07g0806          | Tc01_g025950       | .                  | .                  | . |
| .                  | Gorai.004G222400.1 | .                  | .                  | .                  | . |
| .                  | .                  | .                  | .                  | .                  | . |
| .                  | .                  | .                  | .                  | .                  | . |

|                    |                    |                    |                    |        |   |
|--------------------|--------------------|--------------------|--------------------|--------|---|
| Vv05g0905          | Tc04_g026290       | .                  | .                  | .      | . |
| .                  | .                  | .                  | .                  | .      | . |
| Vv05g0906          | Tc04_g026300       | .                  | Gorai.005G053900.1 | .      | . |
| .                  | .                  | .                  | .                  | .      | . |
| Vv05g0907          | Tc04_g026310       | .                  | .                  | .      | . |
| .                  | .                  | .                  | .                  | .      | . |
| Vv05g0908          | Tc04_g026390       | .                  | Gorai.005G054000.1 | .      | . |
| .                  | .                  | .                  | .                  | .      | . |
| Vv05g0909          | Tc04_g026400       | .                  | Gorai.005G054100.1 | .      | . |
|                    | Gorai.011G179700.1 | .                  | Vv07g0810          | .      | . |
| Tc01_g026020       | Gorai.007G149800.1 | .                  | .                  | Gorai. | . |
| 004G059100.1       | .                  | .                  | .                  | .      | . |
| .                  | .                  | .                  | .                  | .      | . |
| Vv05g0910          | Tc04_g026410       | .                  | .                  | Gorai. | . |
| 011G179800.1       | .                  | .                  | .                  | .      | . |
| .                  | .                  | .                  | .                  | .      | . |
| Vv05g0911          | Tc04_g026420       | Gorai.006G251000.1 | Gorai.             | .      | . |
| 005G054200.1       | Gorai.011G179900.1 | .                  | .                  | .      | . |
| .                  | .                  | .                  | .                  | .      | . |
| .                  | .                  | .                  | .                  | .      | . |
| Vv05g0912          | .                  | .                  | .                  | .      | . |
| .                  | .                  | .                  | .                  | .      | . |
| .                  | .                  | .                  | .                  | .      | . |
| Vv05g0913          | Tc04_g026430       | Gorai.006G250900.1 | .                  | .      | . |
|                    | Gorai.011G180100.1 | Vv07g0816          | .                  | .      | . |
| Tc01_g026130       | Gorai.007G150000.1 | .                  | .                  | .      | . |
| Gorai.004G222500.1 | Vv11g0364          | Tc09_g009400       | .                  | .      | . |
| .                  | Gorai.009G026700.1 | .                  | .                  | .      | . |
| Vv05g0914          | Tc04_g026440       | .                  | .                  | .      | . |
| .                  | .                  | .                  | .                  | .      | . |
| .                  | .                  | .                  | .                  | .      | . |
| Vv05g0915          | .                  | .                  | .                  | .      | . |
| .                  | .                  | .                  | .                  | .      | . |
| .                  | .                  | .                  | .                  | .      | . |
| Vv05g0916          | Tc04_g026450       | Gorai.006G250800.1 | .                  | .      | . |
| Gorai.006G073300.1 | .                  | .                  | .                  | .      | . |
| .                  | .                  | .                  | .                  | .      | . |
| .                  | .                  | .                  | .                  | .      | . |
| Vv05g0917          | .                  | .                  | .                  | .      | . |
| .                  | .                  | .                  | .                  | .      | . |
| .                  | .                  | .                  | .                  | .      | . |
| Vv05g0918          | .                  | .                  | .                  | .      | . |
| .                  | .                  | .                  | .                  | .      | . |
| .                  | .                  | .                  | .                  | .      | . |
| Vv05g0919          | .                  | .                  | .                  | .      | . |
| .                  | .                  | .                  | .                  | .      | . |

|              |              |                    |                    |   |        |   |   |
|--------------|--------------|--------------------|--------------------|---|--------|---|---|
| Vv05g0920    | .            | .                  | .                  | . | .      | . | . |
| .            | .            | .                  | .                  | . | .      | . | . |
| Vv05g0921    | .            | .                  | .                  | . | .      | . | . |
| .            | .            | .                  | .                  | . | .      | . | . |
| Vv05g0922    | .            | .                  | .                  | . | .      | . | . |
| .            | .            | .                  | .                  | . | .      | . | . |
| Vv05g0923    | .            | .                  | .                  | . | .      | . | . |
| .            | .            | .                  | .                  | . | .      | . | . |
| Vv05g0924    | .            | Gorai.006G247800.1 | .                  | . | .      | . | . |
| .            | .            | .                  | .                  | . | .      | . | . |
| Vv05g0925    | .            | .                  | .                  | . | .      | . | . |
| .            | .            | .                  | .                  | . | .      | . | . |
| Vv05g0926    | Tc04_g026520 | .                  | .                  | . | .      | . | . |
| .            | .            | .                  | .                  | . | .      | . | . |
| Vv05g0927    | .            | Gorai.005G054300.1 | .                  | . | .      | . | . |
| .            | .            | .                  | .                  | . | .      | . | . |
| Vv05g0928    | .            | .                  | .                  | . | .      | . | . |
| Vv11g0388    | .            | .                  | .                  | . | .      | . | . |
| .            | .            | .                  | .                  | . | .      | . | . |
| Vv05g0929    | .            | .                  | .                  | . | .      | . | . |
| .            | .            | .                  | .                  | . | .      | . | . |
| Vv05g0930    | .            | .                  | .                  | . | .      | . | . |
| .            | .            | .                  | .                  | . | .      | . | . |
| Vv05g0931    | Tc04_g026580 | .                  | .                  | . | .      | . | . |
| .            | .            | .                  | .                  | . | .      | . | . |
| Vv05g0932    | Tc04_g026590 | .                  | .                  | . | .      | . | . |
| .            | .            | .                  | .                  | . | .      | . | . |
| Vv05g0933    | Tc04_g026600 | .                  | .                  | . | Gorai. | . | . |
| 011G180300.1 | .            | .                  | .                  | . | .      | . | . |
| .            | .            | .                  | .                  | . | .      | . | . |
| Vv05g0934    | Tc04_g026610 | .                  | .                  | . | .      | . | . |
| .            | .            | .                  | .                  | . | .      | . | . |
| Vv05g0935    | .            | .                  | .                  | . | .      | . | . |
| .            | .            | .                  | .                  | . | .      | . | . |
| Vv05g0936    | Tc04_g026620 | .                  | Gorai.005G054900.1 | . | .      | . | . |

|                    |              |   |   |                    |        |   |
|--------------------|--------------|---|---|--------------------|--------|---|
| Gorai.006G073500.1 | .            | . | . | .                  | .      | . |
| .                  | .            | . | . | .                  | .      | . |
| Vv05g0937          | .            | . | . | .                  | .      | . |
| .                  | .            | . | . | .                  | .      | . |
| Vv05g0938          | Tc04_g026630 | . | . | Gorai.005G055000.1 | .      | . |
| .                  | .            | . | . | .                  | .      | . |
| Vv05g0939          | Tc04_g026640 | . | . | Gorai.005G055100.1 | .      | . |
| Gorai.011G165800.1 | .            | . | . | .                  | .      | . |
| .                  | .            | . | . | .                  | .      | . |
| Vv05g0940          | Tc04_g026660 | . | . | .                  | Gorai. | . |
| 011G180400.1       | .            | . | . | .                  | .      | . |
| .                  | .            | . | . | .                  | .      | . |
| Vv05g0941          | .            | . | . | .                  | .      | . |
| .                  | .            | . | . | .                  | .      | . |
| Vv05g0942          | Tc04_g026670 | . | . | .                  | .      | . |
| .                  | .            | . | . | .                  | .      | . |
| Vv05g0943          | .            | . | . | .                  | .      | . |
| .                  | .            | . | . | .                  | .      | . |
| Vv05g0944          | .            | . | . | .                  | .      | . |
| .                  | .            | . | . | .                  | .      | . |
| Vv05g0945          | .            | . | . | .                  | .      | . |
| .                  | .            | . | . | .                  | .      | . |
| Vv05g0946          | Tc04_g026690 | . | . | Gorai.005G055200.1 | .      | . |
| Gorai.011G180800.1 | .            | . | . | .                  | .      | . |
| .                  | .            | . | . | .                  | .      | . |
| Vv05g0947          | .            | . | . | .                  | .      | . |
| .                  | .            | . | . | .                  | .      | . |
| Vv05g0948          | Tc04_g026700 | . | . | .                  | .      | . |
| .                  | .            | . | . | .                  | .      | . |
| Vv05g0949          | Tc04_g026720 | . | . | .                  | .      | . |
| .                  | .            | . | . | .                  | .      | . |
| Vv05g0950          | Tc04_g026730 | . | . | .                  | .      | . |
| .                  | .            | . | . | .                  | .      | . |
| Vv05g0951          | Tc04_g026770 | . | . | .                  | .      | . |
| .                  | .            | . | . | .                  | .      | . |
| .                  | .            | . | . | .                  | .      | . |

|                    |                    |                    |        |                    |   |   |   |
|--------------------|--------------------|--------------------|--------|--------------------|---|---|---|
| Vv05g0952          | .                  | .                  | .      | .                  | . | . | . |
| .                  | .                  | .                  | .      | .                  | . | . | . |
| Vv05g0953          | Tc04_g026780       | .                  | .      | Gorai.005G057300.1 | . | . | . |
| Gorai.006G073600.1 | Gorai.011G180900.1 | .                  | .      | .                  | . | . | . |
| .                  | .                  | .                  | .      | .                  | . | . | . |
| Vv05g0954          | .                  | .                  | .      | .                  | . | . | . |
| .                  | .                  | .                  | .      | .                  | . | . | . |
| Vv05g0955          | .                  | .                  | .      | .                  | . | . | . |
| .                  | .                  | .                  | .      | .                  | . | . | . |
| Vv05g0956          | Tc04_g022600       | .                  | .      | Gorai.005G036200.1 | . | . | . |
| .                  | .                  | .                  | .      | .                  | . | . | . |
| Vv05g0957          | Tc04_g022590       | Gorai.006G218600.1 | .      | .                  | . | . | . |
| .                  | .                  | .                  | .      | .                  | . | . | . |
| Vv05g0958          | .                  | .                  | .      | Gorai.011G181000.1 | . | . | . |
| .                  | .                  | .                  | .      | .                  | . | . | . |
| Vv05g0959          | Tc04_g022580       | Gorai.006G218700.1 | .      | .                  | . | . | . |
| Gorai.006G053100.1 | Gorai.011G164300.1 | .                  | .      | .                  | . | . | . |
| .                  | .                  | .                  | .      | .                  | . | . | . |
| Vv05g0960          | Tc04_g022570       | .                  | .      | Gorai.             | . | . | . |
| 011G164200.1       | Vv11g0403          | Tc09_g009820       | .      | .                  | . | . | . |
| Gorai.001G028900.1 | .                  | Gorai.009G024800.1 | Gorai. | .                  | . | . | . |
| 010G071100.1       | .                  | .                  | .      | .                  | . | . | . |
| Vv05g0961          | Tc04_g022560       | .                  | .      | Gorai.             | . | . | . |
| 011G164100.1       | .                  | .                  | .      | .                  | . | . | . |
| .                  | .                  | .                  | .      | .                  | . | . | . |
| Vv05g0962          | .                  | .                  | .      | .                  | . | . | . |
| .                  | .                  | .                  | .      | .                  | . | . | . |
| Vv05g0963          | .                  | .                  | .      | .                  | . | . | . |
| .                  | .                  | .                  | .      | .                  | . | . | . |
| Vv05g0964          | .                  | .                  | .      | .                  | . | . | . |
| .                  | .                  | .                  | .      | .                  | . | . | . |
| Vv05g0965          | .                  | .                  | .      | .                  | . | . | . |
| .                  | .                  | .                  | .      | .                  | . | . | . |
| Vv05g0966          | Tc04_g022320       | Gorai.006G218800.1 | .      | .                  | . | . | . |
| Gorai.011G164000.1 | .                  | .                  | .      | .                  | . | . | . |
| .                  | .                  | .                  | .      | .                  | . | . | . |
| Vv05g0967          | Tc04_g022310       | .                  | .      | Gorai.005G038200.1 | . | . | . |



|           |                    |  |  |                    |  |  |  |
|-----------|--------------------|--|--|--------------------|--|--|--|
| Vv05g0968 |                    |  |  |                    |  |  |  |
| Vv05g0969 | Tc04_g022290       |  |  | Gorai.005G038400.1 |  |  |  |
|           | Gorai.011G163600.1 |  |  |                    |  |  |  |
| Vv05g0970 |                    |  |  |                    |  |  |  |
| Vv05g0971 |                    |  |  |                    |  |  |  |
| Vv05g0972 |                    |  |  |                    |  |  |  |
| Vv05g0973 |                    |  |  |                    |  |  |  |
| Vv05g0974 | Tc04_g016890       |  |  |                    |  |  |  |
| Vv05g0975 |                    |  |  |                    |  |  |  |
| Vv05g0976 |                    |  |  |                    |  |  |  |
| Vv05g0977 |                    |  |  |                    |  |  |  |
| Vv05g0978 | Tc04_g022240       |  |  | Gorai.005G038500.1 |  |  |  |
| Vv05g0979 |                    |  |  |                    |  |  |  |
| Vv05g0980 | Tc04_g016870       |  |  |                    |  |  |  |
| Vv05g0981 |                    |  |  |                    |  |  |  |
| Vv05g0982 |                    |  |  |                    |  |  |  |
| Vv05g0983 |                    |  |  |                    |  |  |  |

|                    |                    |                    |        |   |   |   |   |
|--------------------|--------------------|--------------------|--------|---|---|---|---|
| Vv05g0984          | .                  | .                  | .      | . | . | . | . |
| .                  | .                  | .                  | .      | . | . | . | . |
| Vv05g0985          | .                  | .                  | .      | . | . | . | . |
| .                  | .                  | .                  | .      | . | . | . | . |
| Vv05g0986          | Tc04_g016850       | .                  | .      | . | . | . | . |
| .                  | .                  | .                  | .      | . | . | . | . |
| Vv05g0987          | .                  | .                  | .      | . | . | . | . |
| .                  | .                  | .                  | .      | . | . | . | . |
| Vv05g0988          | .                  | .                  | .      | . | . | . | . |
| .                  | .                  | .                  | .      | . | . | . | . |
| Vv05g0989          | .                  | .                  | .      | . | . | . | . |
| .                  | .                  | .                  | .      | . | . | . | . |
| Vv05g0990          | Tc04_g022230       | .                  | .      | . | . | . | . |
| .                  | .                  | .                  | .      | . | . | . | . |
| Vv05g0991          | Tc04_g022200       | .                  | .      | . | . | . | . |
| .                  | .                  | .                  | .      | . | . | . | . |
| Vv05g0992          | .                  | .                  | .      | . | . | . | . |
| .                  | .                  | .                  | .      | . | . | . | . |
| Vv05g0993          | Gorai.006G219100.1 | .                  | .      | . | . | . | . |
| .                  | .                  | .                  | .      | . | . | . | . |
| Vv05g0994          | Tc04_g022140       | Gorai.006G219200.1 | .      | . | . | . | . |
| .                  | .                  | .                  | .      | . | . | . | . |
| Vv05g0995          | .                  | .                  | .      | . | . | . | . |
| .                  | .                  | .                  | .      | . | . | . | . |
| Vv05g0996          | Tc04_g022120       | Gorai.005G039000.1 | .      | . | . | . | . |
| Gorai.006G054900.1 | .                  | .                  | .      | . | . | . | . |
| .                  | .                  | .                  | .      | . | . | . | . |
| Vv05g0997          | .                  | .                  | .      | . | . | . | . |
| .                  | .                  | .                  | .      | . | . | . | . |
| Vv05g0998          | Tc04_g022110       | Gorai.006G219300.1 | .      | . | . | . | . |
| Gorai.011G163200.1 | .                  | Vv11g0431          | .      | . | . | . | . |
| Tc09_g010110       | Gorai.001G003900.1 | .                  | Gorai. | . | . | . | . |
| 009G023600.1       | .                  | .                  | .      | . | . | . | . |
| .                  | .                  | .                  | .      | . | . | . | . |
| Vv05g0999          | Tc04_g022100       | .                  | .      | . | . | . | . |

|                    |              |   |   |   |   |                    |   |
|--------------------|--------------|---|---|---|---|--------------------|---|
| .                  | .            | . | . | . | . | .                  | . |
| .                  | .            | . | . | . | . | .                  | . |
| Vv05g1000          | Tc04_g022090 | . | . | . | . | Gorai.             | . |
| 011G163100.1       | .            | . | . | . | . | .                  | . |
| .                  | .            | . | . | . | . | .                  | . |
| Vv05g1001          | .            | . | . | . | . | .                  | . |
| .                  | .            | . | . | . | . | .                  | . |
| .                  | .            | . | . | . | . | .                  | . |
| Vv05g1002          | Tc04_g022080 | . | . | . | . | Gorai.             | . |
| 011G163000.1       | .            | . | . | . | . | .                  | . |
| .                  | .            | . | . | . | . | .                  | . |
| Vv05g1003          | .            | . | . | . | . | .                  | . |
| .                  | .            | . | . | . | . | .                  | . |
| .                  | .            | . | . | . | . | .                  | . |
| Vv05g1004          | Tc04_g022070 | . | . | . | . | Gorai.005G039100.1 | . |
| Gorai.011G162900.1 | .            | . | . | . | . | .                  | . |
| .                  | .            | . | . | . | . | .                  | . |
| .                  | .            | . | . | . | . | .                  | . |
| Vv05g1005          | .            | . | . | . | . | .                  | . |
| .                  | .            | . | . | . | . | .                  | . |
| .                  | .            | . | . | . | . | .                  | . |
| Vv05g1006          | Tc04_g022050 | . | . | . | . | Gorai.005G039200.1 | . |
| .                  | .            | . | . | . | . | .                  | . |
| .                  | .            | . | . | . | . | .                  | . |
| Vv05g1007          | .            | . | . | . | . | .                  | . |
| .                  | .            | . | . | . | . | .                  | . |
| .                  | .            | . | . | . | . | .                  | . |
| Vv05g1008          | .            | . | . | . | . | .                  | . |
| .                  | .            | . | . | . | . | .                  | . |
| .                  | .            | . | . | . | . | .                  | . |
| Vv05g1009          | Tc04_g021930 | . | . | . | . | .                  | . |
| .                  | .            | . | . | . | . | .                  | . |
| .                  | .            | . | . | . | . | .                  | . |
| Vv05g1010          | .            | . | . | . | . | .                  | . |
| .                  | .            | . | . | . | . | .                  | . |
| .                  | .            | . | . | . | . | .                  | . |
| Vv05g1011          | .            | . | . | . | . | .                  | . |
| .                  | .            | . | . | . | . | .                  | . |
| .                  | .            | . | . | . | . | .                  | . |
| Vv05g1012          | Tc04_g021890 | . | . | . | . | Gorai.006G055400.1 | . |
| Gorai.011G162600.1 | .            | . | . | . | . | .                  | . |
| .                  | .            | . | . | . | . | .                  | . |
| .                  | .            | . | . | . | . | .                  | . |
| Vv05g1013          | Tc04_g021850 | . | . | . | . | Gorai.006G055600.1 | . |
| .                  | .            | . | . | . | . | .                  | . |
| .                  | .            | . | . | . | . | .                  | . |
| Vv05g1014          | .            | . | . | . | . | .                  | . |
| .                  | .            | . | . | . | . | .                  | . |
| .                  | .            | . | . | . | . | .                  | . |
| Vv05g1015          | Tc04_g021800 | . | . | . | . | Gorai.             | . |

|                    |              |                    |   |   |                    |   |
|--------------------|--------------|--------------------|---|---|--------------------|---|
| 011G162100.1       | .            | .                  | . | . | .                  | . |
| Vv05g1016          | Tc04_g021790 | Gorai.006G219600.1 | . | . | .                  | . |
| Vv05g1017          | .            | .                  | . | . | .                  | . |
| Vv05g1018          | Tc04_g021780 | Gorai.006G219800.1 | . | . | .                  | . |
| Gorai.011G161900.1 | .            | .                  | . | . | .                  | . |
| Vv05g1019          | .            | .                  | . | . | .                  | . |
| Vv05g1020          | .            | .                  | . | . | .                  | . |
| Vv05g1021          | .            | .                  | . | . | .                  | . |
| Vv05g1022          | Tc04_g021760 | .                  | . | . | Gorai.             | . |
| 011G161800.1       | .            | .                  | . | . | .                  | . |
| Vv05g1023          | Tc04_g021750 | .                  | . | . | Gorai.006G055700.1 | . |
| Vv05g1024          | Tc04_g021720 | .                  | . | . | Gorai.005G035500.1 | . |
| Vv05g1025          | .            | .                  | . | . | .                  | . |
| Vv05g1026          | Tc04_g021670 | Gorai.006G219900.1 | . | . | .                  | . |
| Vv05g1027          | .            | .                  | . | . | .                  | . |
| Vv05g1028          | .            | .                  | . | . | .                  | . |
| Vv05g1029          | .            | .                  | . | . | .                  | . |
| Vv05g1030          | .            | .                  | . | . | .                  | . |
| Vv05g1031          | Tc04_g021660 | .                  | . | . | Gorai.             | . |
| 011G161700.1       | .            | .                  | . | . | .                  | . |

|              |              |   |                    |   |   |        |   |
|--------------|--------------|---|--------------------|---|---|--------|---|
| Vv05g1032    | .            | . | .                  | . | . | .      | . |
| .            | .            | . | .                  | . | . | .      | . |
| Vv05g1033    | .            | . | .                  | . | . | .      | . |
| .            | .            | . | .                  | . | . | .      | . |
| Vv05g1034    | .            | . | .                  | . | . | .      | . |
| .            | .            | . | .                  | . | . | .      | . |
| Vv05g1035    | .            | . | .                  | . | . | .      | . |
| .            | .            | . | .                  | . | . | .      | . |
| Vv05g1036    | .            | . | .                  | . | . | .      | . |
| .            | .            | . | .                  | . | . | .      | . |
| Vv05g1037    | .            | . | .                  | . | . | .      | . |
| .            | .            | . | .                  | . | . | .      | . |
| Vv05g1038    | .            | . | .                  | . | . | .      | . |
| .            | .            | . | .                  | . | . | .      | . |
| Vv05g1039    | .            | . | .                  | . | . | .      | . |
| .            | .            | . | .                  | . | . | .      | . |
| Vv05g1040    | .            | . | .                  | . | . | .      | . |
| .            | .            | . | .                  | . | . | .      | . |
| Vv05g1041    | .            | . | .                  | . | . | .      | . |
| .            | .            | . | .                  | . | . | .      | . |
| Vv05g1042    | .            | . | .                  | . | . | .      | . |
| .            | .            | . | .                  | . | . | .      | . |
| Vv05g1043    | .            | . | .                  | . | . | .      | . |
| .            | .            | . | .                  | . | . | .      | . |
| Vv05g1044    | .            | . | .                  | . | . | .      | . |
| .            | .            | . | .                  | . | . | .      | . |
| Vv05g1045    | Tc04_g021640 | . | .                  | . | . | Gorai. | . |
| 011G161400.1 | .            | . | .                  | . | . | .      | . |
| Vv05g1046    | .            | . | Gorai.005G035200.1 | . | . | .      | . |
| .            | .            | . | .                  | . | . | .      | . |
| Vv05g1047    | .            | . | .                  | . | . | .      | . |
| .            | .            | . | .                  | . | . | .      | . |
| Vv05g1048    | .            | . | .                  | . | . | .      | . |

|           |  |              |                    |  |                    |  |  |
|-----------|--|--------------|--------------------|--|--------------------|--|--|
| Vv05g1049 |  |              |                    |  |                    |  |  |
| Vv05g1050 |  |              |                    |  | Gorai.011G160200.1 |  |  |
| Vv05g1051 |  |              |                    |  |                    |  |  |
| Vv05g1052 |  |              |                    |  |                    |  |  |
| Vv05g1053 |  |              | Gorai.006G221200.1 |  |                    |  |  |
| Vv05g1054 |  |              |                    |  |                    |  |  |
| Vv05g1055 |  | Tc04_g021390 |                    |  |                    |  |  |
| Vv05g1056 |  |              |                    |  |                    |  |  |
| Vv05g1057 |  |              |                    |  |                    |  |  |
| Vv05g1058 |  |              |                    |  |                    |  |  |
| Vv05g1059 |  |              |                    |  | Gorai.006G056100.1 |  |  |
| Vv05g1060 |  |              |                    |  |                    |  |  |
| Vv05g1061 |  |              |                    |  |                    |  |  |
| Vv05g1062 |  |              |                    |  |                    |  |  |
| Vv05g1063 |  |              |                    |  |                    |  |  |
| Vv05g1064 |  |              |                    |  |                    |  |  |

|           |   |   |   |   |   |   |   |
|-----------|---|---|---|---|---|---|---|
| Vv05g1065 | . | . | . | . | . | . | . |
| .         | . | . | . | . | . | . | . |
| Vv05g1066 | . | . | . | . | . | . | . |
| .         | . | . | . | . | . | . | . |
| Vv05g1067 | . | . | . | . | . | . | . |
| .         | . | . | . | . | . | . | . |
| Vv05g1068 | . | . | . | . | . | . | . |
| .         | . | . | . | . | . | . | . |
| Vv05g1069 | . | . | . | . | . | . | . |
| .         | . | . | . | . | . | . | . |
| Vv05g1070 | . | . | . | . | . | . | . |
| .         | . | . | . | . | . | . | . |
| Vv05g1071 | . | . | . | . | . | . | . |
| .         | . | . | . | . | . | . | . |
| Vv05g1072 | . | . | . | . | . | . | . |
| .         | . | . | . | . | . | . | . |
| Vv05g1073 | . | . | . | . | . | . | . |
| .         | . | . | . | . | . | . | . |
| Vv05g1074 | . | . | . | . | . | . | . |
| .         | . | . | . | . | . | . | . |
| Vv05g1075 | . | . | . | . | . | . | . |
| .         | . | . | . | . | . | . | . |
| Vv05g1076 | . | . | . | . | . | . | . |
| .         | . | . | . | . | . | . | . |
| Vv05g1077 | . | . | . | . | . | . | . |
| .         | . | . | . | . | . | . | . |
| Vv05g1078 | . | . | . | . | . | . | . |
| .         | . | . | . | . | . | . | . |
| Vv05g1079 | . | . | . | . | . | . | . |
| .         | . | . | . | . | . | . | . |
| Vv05g1080 | . | . | . | . | . | . | . |
| .         | . | . | . | . | . | . | . |
| Vv05g1081 | . | . | . | . | . | . | . |
| .         | . | . | . | . | . | . | . |





|              |                    |                    |        |                    |   |
|--------------|--------------------|--------------------|--------|--------------------|---|
| Vv05g1098    | .                  | Gorai.006G221900.1 | .      | .                  | . |
| .            | .                  | .                  | .      | .                  | . |
| Vv05g1099    | .                  | .                  | .      | .                  | . |
| .            | .                  | .                  | .      | .                  | . |
| Vv05g1100    | .                  | .                  | .      | Gorai.011G159100.1 | . |
| .            | .                  | .                  | .      | .                  | . |
| Vv05g1101    | .                  | .                  | .      | .                  | . |
| .            | .                  | .                  | .      | .                  | . |
| Vv05g1102    | .                  | Gorai.006G222400.1 | .      | Gorai.005G033900.1 | . |
| .            | Gorai.011G158500.1 | .                  | .      | .                  | . |
| .            | .                  | .                  | .      | .                  | . |
| Vv05g1103    | .                  | .                  | .      | Gorai.011G158400.1 | . |
| .            | .                  | .                  | .      | .                  | . |
| Vv05g1104    | .                  | .                  | .      | .                  | . |
| .            | .                  | .                  | .      | .                  | . |
| Vv05g1105    | .                  | .                  | .      | .                  | . |
| .            | .                  | .                  | .      | .                  | . |
| Vv05g1106    | .                  | .                  | .      | .                  | . |
| .            | .                  | .                  | .      | .                  | . |
| Vv05g1107    | .                  | .                  | .      | .                  | . |
| .            | .                  | .                  | .      | .                  | . |
| Vv05g1108    | .                  | .                  | .      | .                  | . |
| .            | .                  | .                  | .      | .                  | . |
| Vv05g1109    | .                  | .                  | .      | .                  | . |
| .            | .                  | .                  | .      | .                  | . |
| Vv05g1110    | Tc04_g021250       | Gorai.006G222500.1 | Gorai. | .                  | . |
| 005G033800.1 | .                  | .                  | .      | .                  | . |
| .            | .                  | .                  | .      | .                  | . |
| Vv05g1111    | .                  | .                  | .      | .                  | . |
| .            | .                  | .                  | .      | .                  | . |
| Vv05g1112    | .                  | .                  | .      | .                  | . |
| .            | .                  | .                  | .      | .                  | . |
| Vv05g1113    | Tc04_g021210       | .                  | Gorai. | .                  | . |
| 011G157600.1 | .                  | .                  | .      | .                  | . |
| .            | .                  | .                  | .      | .                  | . |

|              |                    |                    |                    |   |
|--------------|--------------------|--------------------|--------------------|---|
| Vv05g1114    | Tc04_g021200       | Gorai.006G222600.1 | .                  | . |
|              | Gorai.011G157500.1 | .                  | .                  | . |
| .            | .                  | .                  | .                  | . |
| Vv05g1115    | .                  | .                  | .                  | . |
| .            | .                  | .                  | .                  | . |
| Vv05g1116    | .                  | .                  | Gorai.011G156700.1 | . |
| .            | .                  | .                  | .                  | . |
| Vv05g1117    | .                  | .                  | .                  | . |
| .            | .                  | .                  | .                  | . |
| Vv05g1118    | .                  | .                  | .                  | . |
| .            | .                  | .                  | .                  | . |
| Vv05g1119    | .                  | .                  | .                  | . |
| .            | .                  | .                  | .                  | . |
| Vv05g1120    | .                  | .                  | .                  | . |
| .            | .                  | .                  | .                  | . |
| Vv05g1121    | .                  | .                  | .                  | . |
| .            | .                  | .                  | .                  | . |
| Vv05g1122    | .                  | .                  | .                  | . |
| .            | .                  | .                  | .                  | . |
| Vv05g1123    | .                  | .                  | .                  | . |
| .            | .                  | .                  | .                  | . |
| Vv05g1124    | .                  | .                  | .                  | . |
| .            | .                  | .                  | .                  | . |
| Vv05g1125    | .                  | .                  | .                  | . |
| .            | .                  | .                  | .                  | . |
| Vv05g1126    | Tc04_g021150       | Gorai.005G032500.1 | .                  | . |
| .            | .                  | .                  | .                  | . |
| Vv05g1127    | Tc04_g021140       | Gorai.006G222700.1 | Gorai.             | . |
| 005G032400.1 | .                  | .                  | .                  | . |
| .            | .                  | .                  | .                  | . |
| Vv05g1128    | .                  | Gorai.005G029800.1 | .                  | . |
| .            | .                  | .                  | .                  | . |
| Vv05g1129    | .                  | .                  | .                  | . |
| .            | .                  | .                  | .                  | . |
| .            | .                  | .                  | .                  | . |

|                    |   |                    |                    |   |   |   |   |
|--------------------|---|--------------------|--------------------|---|---|---|---|
| Vv05g1130          | . | .                  | .                  | . | . | . | . |
| .                  | . | .                  | .                  | . | . | . | . |
| Vv05g1131          | . | .                  | .                  | . | . | . | . |
| .                  | . | .                  | .                  | . | . | . | . |
| Vv05g1132          | . | .                  | Gorai.005G027000.1 | . | . | . | . |
| .                  | . | .                  | .                  | . | . | . | . |
| Vv05g1133          | . | .                  | .                  | . | . | . | . |
| .                  | . | .                  | .                  | . | . | . | . |
| Vv05g1134          | . | .                  | .                  | . | . | . | . |
| .                  | . | .                  | .                  | . | . | . | . |
| Vv05g1135          | . | .                  | .                  | . | . | . | . |
| .                  | . | .                  | .                  | . | . | . | . |
| Vv05g1136          | . | .                  | .                  | . | . | . | . |
| .                  | . | .                  | .                  | . | . | . | . |
| Vv05g1137          | . | Gorai.006G223800.1 | .                  | . | . | . | . |
| .                  | . | .                  | .                  | . | . | . | . |
| Vv05g1138          | . | .                  | .                  | . | . | . | . |
| .                  | . | .                  | .                  | . | . | . | . |
| Vv05g1139          | . | .                  | .                  | . | . | . | . |
| .                  | . | .                  | .                  | . | . | . | . |
| Vv05g1140          | . | .                  | .                  | . | . | . | . |
| .                  | . | .                  | .                  | . | . | . | . |
| Vv05g1141          | . | .                  | .                  | . | . | . | . |
| .                  | . | .                  | .                  | . | . | . | . |
| Vv05g1142          | . | .                  | .                  | . | . | . | . |
| .                  | . | .                  | .                  | . | . | . | . |
| Vv05g1143          | . | Gorai.006G223900.1 | .                  | . | . | . | . |
| Gorai.011G154000.1 | . | .                  | .                  | . | . | . | . |
| .                  | . | .                  | .                  | . | . | . | . |
| Vv05g1144          | . | .                  | .                  | . | . | . | . |
| .                  | . | .                  | .                  | . | . | . | . |
| Vv05g1145          | . | .                  | .                  | . | . | . | . |
| .                  | . | .                  | .                  | . | . | . | . |
| Vv05g1146          | . | .                  | .                  | . | . | . | . |

|                    |                    |                    |                    |                    |                    |   |   |
|--------------------|--------------------|--------------------|--------------------|--------------------|--------------------|---|---|
| .                  | .                  | .                  | .                  | .                  | .                  | . | . |
| .                  | .                  | .                  | .                  | .                  | .                  | . | . |
| Vv05g1147          | .                  | .                  | .                  | .                  | .                  | . | . |
| .                  | .                  | .                  | .                  | .                  | .                  | . | . |
| Vv05g1148          | .                  | Gorai.006G224000.1 | .                  | .                  | Gorai.005G027500.1 | . | . |
| .                  | .                  | .                  | .                  | .                  | .                  | . | . |
| .                  | .                  | .                  | .                  | .                  | .                  | . | . |
| Vv05g1149          | Tc04_g028080       | .                  | .                  | Gorai.005G027600.1 | .                  | . | . |
| .                  | .                  | .                  | .                  | .                  | .                  | . | . |
| Vv05g1150          | .                  | .                  | .                  | .                  | .                  | . | . |
| .                  | .                  | .                  | .                  | .                  | .                  | . | . |
| Vv05g1151          | .                  | .                  | .                  | .                  | .                  | . | . |
| .                  | .                  | .                  | .                  | .                  | .                  | . | . |
| Vv05g1152          | .                  | .                  | .                  | .                  | .                  | . | . |
| .                  | .                  | .                  | .                  | .                  | .                  | . | . |
| Vv05g1153          | .                  | Gorai.006G225700.1 | .                  | .                  | .                  | . | . |
| .                  | .                  | .                  | .                  | .                  | .                  | . | . |
| Vv05g1154          | Tc04_g028190       | .                  | .                  | Gorai.006G076100.1 | .                  | . | . |
| .                  | .                  | .                  | .                  | .                  | .                  | . | . |
| Vv05g1155          | .                  | .                  | .                  | .                  | .                  | . | . |
| .                  | .                  | .                  | .                  | .                  | .                  | . | . |
| Vv05g1156          | .                  | .                  | .                  | .                  | .                  | . | . |
| .                  | .                  | .                  | .                  | .                  | .                  | . | . |
| Vv05g1157          | Tc04_g028300       | .                  | .                  | Gorai.005G028000.1 | .                  | . | . |
| .                  | Gorai.011G153500.1 | .                  | .                  | .                  | .                  | . | . |
| .                  | .                  | .                  | .                  | .                  | .                  | . | . |
| Vv05g1158          | .                  | .                  | .                  | .                  | .                  | . | . |
| .                  | .                  | .                  | .                  | .                  | .                  | . | . |
| Vv05g1159          | Tc04_g020940       | .                  | .                  | .                  | .                  | . | . |
| .                  | .                  | .                  | .                  | .                  | .                  | . | . |
| Vv05g1160          | .                  | .                  | .                  | .                  | .                  | . | . |
| .                  | .                  | .                  | .                  | .                  | .                  | . | . |
| Vv05g1161          | .                  | .                  | Gorai.005G028200.1 | .                  | .                  | . | . |
| Gorai.011G153200.1 | .                  | .                  | .                  | .                  | .                  | . | . |
| .                  | .                  | .                  | .                  | .                  | .                  | . | . |
| .                  | .                  | .                  | .                  | .                  | .                  | . | . |

|           |   |   |                    |                    |   |   |   |
|-----------|---|---|--------------------|--------------------|---|---|---|
| Vv05g1162 | . | . | .                  | .                  | . | . | . |
| .         | . | . | .                  | .                  | . | . | . |
| Vv05g1163 | . | . | .                  | .                  | . | . | . |
| .         | . | . | .                  | .                  | . | . | . |
| Vv05g1164 | . | . | Gorai.005G028300.1 | .                  | . | . | . |
| .         | . | . | .                  | .                  | . | . | . |
| Vv05g1165 | . | . | .                  | .                  | . | . | . |
| .         | . | . | .                  | .                  | . | . | . |
| Vv05g1166 | . | . | .                  | Gorai.011G152900.1 | . | . | . |
| .         | . | . | .                  | .                  | . | . | . |
| Vv05g1167 | . | . | .                  | .                  | . | . | . |
| .         | . | . | .                  | .                  | . | . | . |
| Vv05g1168 | . | . | .                  | .                  | . | . | . |
| .         | . | . | .                  | .                  | . | . | . |
| Vv05g1169 | . | . | .                  | .                  | . | . | . |
| .         | . | . | .                  | .                  | . | . | . |
| Vv05g1170 | . | . | .                  | .                  | . | . | . |
| .         | . | . | .                  | .                  | . | . | . |
| Vv05g1171 | . | . | .                  | .                  | . | . | . |
| .         | . | . | .                  | .                  | . | . | . |
| Vv05g1172 | . | . | .                  | .                  | . | . | . |
| .         | . | . | .                  | .                  | . | . | . |
| Vv05g1173 | . | . | .                  | .                  | . | . | . |
| .         | . | . | .                  | .                  | . | . | . |
| Vv05g1174 | . | . | .                  | .                  | . | . | . |
| .         | . | . | .                  | .                  | . | . | . |
| Vv05g1175 | . | . | .                  | .                  | . | . | . |
| .         | . | . | .                  | .                  | . | . | . |
| Vv05g1176 | . | . | Gorai.005G028500.1 | .                  | . | . | . |
| .         | . | . | .                  | .                  | . | . | . |
| Vv05g1177 | . | . | .                  | .                  | . | . | . |
| .         | . | . | .                  | .                  | . | . | . |
| Vv05g1178 | . | . | .                  | .                  | . | . | . |
| .         | . | . | .                  | .                  | . | . | . |

|           |              |   |   |                    |                    |   |
|-----------|--------------|---|---|--------------------|--------------------|---|
| Vv05g1179 | .            | . | . | .                  | Gorai.011G150100.1 | . |
| .         | .            | . | . | .                  | .                  | . |
| Vv05g1180 | .            | . | . | .                  | .                  | . |
| .         | .            | . | . | .                  | .                  | . |
| Vv05g1181 | .            | . | . | .                  | .                  | . |
| .         | .            | . | . | .                  | .                  | . |
| Vv05g1182 | .            | . | . | .                  | .                  | . |
| .         | .            | . | . | .                  | .                  | . |
| Vv05g1183 | Tc04_g020750 | . | . | Gorai.005G030200.1 | .                  | . |
| .         | .            | . | . | .                  | .                  | . |
| Vv05g1184 | .            | . | . | .                  | .                  | . |
| .         | .            | . | . | .                  | .                  | . |
| Vv05g1185 | .            | . | . | .                  | .                  | . |
| .         | .            | . | . | .                  | .                  | . |
| Vv05g1186 | .            | . | . | .                  | .                  | . |
| .         | .            | . | . | .                  | .                  | . |
| Vv05g1187 | Tc04_g012170 | . | . | .                  | .                  | . |
| .         | .            | . | . | .                  | .                  | . |
| Vv05g1188 | Tc04_g012120 | . | . | .                  | .                  | . |
| .         | .            | . | . | .                  | .                  | . |
| Vv05g1189 | Tc04_g012080 | . | . | .                  | .                  | . |
| .         | .            | . | . | .                  | .                  | . |
| Vv05g1190 | .            | . | . | .                  | .                  | . |
| .         | .            | . | . | .                  | .                  | . |
| Vv05g1191 | .            | . | . | .                  | .                  | . |
| .         | .            | . | . | .                  | .                  | . |
| Vv05g1192 | Tc04_g017220 | . | . | .                  | .                  | . |
| .         | .            | . | . | .                  | .                  | . |
| Vv05g1193 | .            | . | . | .                  | .                  | . |
| .         | .            | . | . | .                  | .                  | . |
| Vv05g1194 | Tc04_g017230 | . | . | .                  | .                  | . |
| .         | .            | . | . | .                  | .                  | . |
| Vv05g1195 | .            | . | . | .                  | .                  | . |

|           |              |   |   |   |   |   |   |
|-----------|--------------|---|---|---|---|---|---|
| .         | .            | . | . | . | . | . | . |
| .         | .            | . | . | . | . | . | . |
| Vv05g1196 | .            | . | . | . | . | . | . |
| .         | .            | . | . | . | . | . | . |
| Vv05g1197 | Tc04_g020430 | . | . | . | . | . | . |
| .         | .            | . | . | . | . | . | . |
| Vv05g1198 | .            | . | . | . | . | . | . |
| .         | .            | . | . | . | . | . | . |
| Vv05g1199 | .            | . | . | . | . | . | . |
| .         | .            | . | . | . | . | . | . |
| Vv05g1200 | .            | . | . | . | . | . | . |
| .         | .            | . | . | . | . | . | . |
| Vv05g1201 | .            | . | . | . | . | . | . |
| .         | .            | . | . | . | . | . | . |
| Vv05g1202 | .            | . | . | . | . | . | . |
| .         | .            | . | . | . | . | . | . |
| Vv05g1203 | .            | . | . | . | . | . | . |
| .         | .            | . | . | . | . | . | . |
| Vv05g1204 | .            | . | . | . | . | . | . |
| .         | .            | . | . | . | . | . | . |
| Vv05g1205 | .            | . | . | . | . | . | . |
| .         | .            | . | . | . | . | . | . |
| Vv05g1206 | .            | . | . | . | . | . | . |
| .         | .            | . | . | . | . | . | . |
| Vv05g1207 | .            | . | . | . | . | . | . |
| .         | .            | . | . | . | . | . | . |
| Vv05g1208 | .            | . | . | . | . | . | . |
| .         | .            | . | . | . | . | . | . |
| Vv05g1209 | .            | . | . | . | . | . | . |
| .         | .            | . | . | . | . | . | . |
| Vv05g1210 | .            | . | . | . | . | . | . |
| .         | .            | . | . | . | . | . | . |
| Vv05g1211 | .            | . | . | . | . | . | . |
| .         | .            | . | . | . | . | . | . |
| .         | .            | . | . | . | . | . | . |

|           |   |   |   |   |   |   |   |
|-----------|---|---|---|---|---|---|---|
| Vv05g1212 | . | . | . | . | . | . | . |
| .         | . | . | . | . | . | . | . |
| Vv05g1213 | . | . | . | . | . | . | . |
| .         | . | . | . | . | . | . | . |
| Vv05g1214 | . | . | . | . | . | . | . |
| .         | . | . | . | . | . | . | . |
| Vv05g1215 | . | . | . | . | . | . | . |
| .         | . | . | . | . | . | . | . |
| Vv05g1216 | . | . | . | . | . | . | . |
| .         | . | . | . | . | . | . | . |
| Vv05g1217 | . | . | . | . | . | . | . |
| .         | . | . | . | . | . | . | . |
| Vv05g1218 | . | . | . | . | . | . | . |
| .         | . | . | . | . | . | . | . |
| Vv05g1219 | . | . | . | . | . | . | . |
| .         | . | . | . | . | . | . | . |
| Vv05g1220 | . | . | . | . | . | . | . |
| .         | . | . | . | . | . | . | . |
| Vv05g1221 | . | . | . | . | . | . | . |
| .         | . | . | . | . | . | . | . |
| Vv05g1222 | . | . | . | . | . | . | . |
| .         | . | . | . | . | . | . | . |
| Vv05g1223 | . | . | . | . | . | . | . |
| .         | . | . | . | . | . | . | . |
| Vv05g1224 | . | . | . | . | . | . | . |
| .         | . | . | . | . | . | . | . |
| Vv05g1225 | . | . | . | . | . | . | . |
| .         | . | . | . | . | . | . | . |
| Vv05g1226 | . | . | . | . | . | . | . |
| .         | . | . | . | . | . | . | . |
| Vv05g1227 | . | . | . | . | . | . | . |
| .         | . | . | . | . | . | . | . |
| Vv05g1228 | . | . | . | . | . | . | . |
| .         | . | . | . | . | . | . | . |



|           |              |  |                    |  |  |  |
|-----------|--------------|--|--------------------|--|--|--|
| Vv05g1229 |              |  |                    |  |  |  |
| Vv05g1230 |              |  |                    |  |  |  |
| Vv05g1231 | Tc04_g017430 |  |                    |  |  |  |
| Vv05g1232 | Tc04_g020330 |  | Gorai.005G026900.1 |  |  |  |
| Vv05g1233 |              |  |                    |  |  |  |
| Vv05g1234 |              |  |                    |  |  |  |
| Vv05g1235 |              |  |                    |  |  |  |
| Vv05g1236 |              |  |                    |  |  |  |
| Vv05g1237 |              |  |                    |  |  |  |
| Vv05g1238 |              |  |                    |  |  |  |
| Vv05g1239 |              |  |                    |  |  |  |
| Vv05g1240 |              |  |                    |  |  |  |
| Vv05g1241 |              |  |                    |  |  |  |
| Vv05g1242 |              |  |                    |  |  |  |
| Vv05g1243 |              |  |                    |  |  |  |
| Vv05g1244 |              |  |                    |  |  |  |
| Vv05g1245 |              |  |                    |  |  |  |

|           |              |   |   |   |   |   |   |
|-----------|--------------|---|---|---|---|---|---|
| .         | .            | . | . | . | . | . | . |
| .         | .            | . | . | . | . | . | . |
| Vv05g1246 | .            | . | . | . | . | . | . |
| .         | .            | . | . | . | . | . | . |
| Vv05g1247 | .            | . | . | . | . | . | . |
| .         | .            | . | . | . | . | . | . |
| Vv05g1248 | .            | . | . | . | . | . | . |
| .         | .            | . | . | . | . | . | . |
| Vv05g1249 | .            | . | . | . | . | . | . |
| .         | .            | . | . | . | . | . | . |
| Vv05g1250 | Tc04_g015630 | . | . | . | . | . | . |
| .         | .            | . | . | . | . | . | . |
| Vv05g1251 | .            | . | . | . | . | . | . |
| .         | .            | . | . | . | . | . | . |
| Vv05g1252 | .            | . | . | . | . | . | . |
| .         | .            | . | . | . | . | . | . |
| Vv05g1253 | .            | . | . | . | . | . | . |
| .         | .            | . | . | . | . | . | . |
| Vv05g1254 | .            | . | . | . | . | . | . |
| .         | .            | . | . | . | . | . | . |
| Vv05g1255 | .            | . | . | . | . | . | . |
| .         | .            | . | . | . | . | . | . |
| Vv05g1256 | .            | . | . | . | . | . | . |
| .         | .            | . | . | . | . | . | . |
| Vv05g1257 | .            | . | . | . | . | . | . |
| .         | .            | . | . | . | . | . | . |
| Vv05g1258 | .            | . | . | . | . | . | . |
| .         | .            | . | . | . | . | . | . |
| Vv05g1259 | .            | . | . | . | . | . | . |
| .         | .            | . | . | . | . | . | . |
| Vv05g1260 | .            | . | . | . | . | . | . |
| .         | .            | . | . | . | . | . | . |
| Vv05g1261 | Tc04_g020280 | . | . | . | . | . | . |
| .         | .            | . | . | . | . | . | . |
| .         | .            | . | . | . | . | . | . |

|           |              |   |                    |   |   |   |   |
|-----------|--------------|---|--------------------|---|---|---|---|
| Vv05g1262 | .            | . | .                  | . | . | . | . |
| .         | .            | . | .                  | . | . | . | . |
| Vv05g1263 | Tc04_g020270 | . | .                  | . | . | . | . |
| .         | .            | . | .                  | . | . | . | . |
| Vv05g1264 | .            | . | .                  | . | . | . | . |
| .         | .            | . | .                  | . | . | . | . |
| Vv05g1265 | Tc04_g020200 | . | Gorai.005G025000.1 | . | . | . | . |
| .         | .            | . | .                  | . | . | . | . |
| Vv05g1266 | .            | . | .                  | . | . | . | . |
| .         | .            | . | .                  | . | . | . | . |
| Vv05g1267 | .            | . | .                  | . | . | . | . |
| .         | .            | . | .                  | . | . | . | . |
| Vv05g1268 | .            | . | .                  | . | . | . | . |
| .         | .            | . | .                  | . | . | . | . |
| Vv05g1269 | .            | . | .                  | . | . | . | . |
| .         | .            | . | .                  | . | . | . | . |
| Vv05g1270 | .            | . | .                  | . | . | . | . |
| .         | .            | . | .                  | . | . | . | . |
| Vv05g1271 | .            | . | .                  | . | . | . | . |
| .         | .            | . | .                  | . | . | . | . |
| Vv05g1272 | .            | . | .                  | . | . | . | . |
| .         | .            | . | .                  | . | . | . | . |
| Vv05g1273 | .            | . | .                  | . | . | . | . |
| .         | .            | . | .                  | . | . | . | . |
| Vv05g1274 | .            | . | .                  | . | . | . | . |
| .         | .            | . | .                  | . | . | . | . |
| Vv05g1275 | .            | . | .                  | . | . | . | . |
| .         | .            | . | .                  | . | . | . | . |
| Vv05g1276 | .            | . | .                  | . | . | . | . |
| .         | .            | . | .                  | . | . | . | . |
| Vv05g1277 | .            | . | .                  | . | . | . | . |
| .         | .            | . | .                  | . | . | . | . |
| Vv05g1278 | .            | . | .                  | . | . | . | . |
| .         | .            | . | .                  | . | . | . | . |

|              |              |                    |                    |                    |   |   |   |
|--------------|--------------|--------------------|--------------------|--------------------|---|---|---|
| Vv05g1279    | .            | .                  | .                  | .                  | . | . | . |
| .            | .            | .                  | .                  | .                  | . | . | . |
| Vv05g1280    | .            | .                  | .                  | .                  | . | . | . |
| .            | .            | .                  | .                  | .                  | . | . | . |
| Vv05g1281    | .            | .                  | .                  | .                  | . | . | . |
| .            | .            | .                  | .                  | .                  | . | . | . |
| Vv05g1282    | .            | .                  | .                  | .                  | . | . | . |
| .            | .            | .                  | .                  | .                  | . | . | . |
| Vv05g1283    | Tc04_g016050 | .                  | .                  | .                  | . | . | . |
| .            | .            | .                  | .                  | .                  | . | . | . |
| Vv05g1284    | .            | .                  | .                  | .                  | . | . | . |
| .            | .            | .                  | .                  | .                  | . | . | . |
| Vv05g1285    | .            | Gorai.006G226200.1 | .                  | Gorai.005G021000.1 | . | . | . |
| .            | .            | .                  | .                  | .                  | . | . | . |
| .            | .            | .                  | .                  | .                  | . | . | . |
| Vv05g1286    | Tc04_g016470 | Gorai.006G226100.1 | .                  | Gorai.             | . | . | . |
| 005G021100.1 | .            | .                  | .                  | .                  | . | . | . |
| .            | .            | .                  | .                  | .                  | . | . | . |
| Vv05g1287    | .            | .                  | .                  | .                  | . | . | . |
| .            | .            | .                  | .                  | .                  | . | . | . |
| Vv05g1288    | .            | .                  | .                  | .                  | . | . | . |
| .            | .            | .                  | .                  | .                  | . | . | . |
| Vv05g1289    | .            | .                  | .                  | .                  | . | . | . |
| .            | .            | .                  | .                  | .                  | . | . | . |
| Vv05g1290    | Tc04_g018240 | Gorai.006G225900.1 | .                  | .                  | . | . | . |
| .            | .            | .                  | .                  | .                  | . | . | . |
| Vv05g1291    | .            | .                  | .                  | .                  | . | . | . |
| .            | .            | .                  | .                  | .                  | . | . | . |
| Vv05g1292    | .            | .                  | .                  | .                  | . | . | . |
| .            | .            | .                  | .                  | .                  | . | . | . |
| Vv05g1293    | .            | .                  | Gorai.005G021300.1 | .                  | . | . | . |
| .            | .            | .                  | .                  | .                  | . | . | . |
| Vv05g1294    | .            | .                  | .                  | .                  | . | . | . |
| .            | .            | .                  | .                  | .                  | . | . | . |

|              |              |                    |                    |   |        |   |   |
|--------------|--------------|--------------------|--------------------|---|--------|---|---|
| Vv05g1295    | .            | .                  | .                  | . | .      | . | . |
| .            | .            | .                  | .                  | . | .      | . | . |
| Vv05g1296    | .            | .                  | Gorai.005G022200.1 | . | .      | . | . |
| .            | .            | .                  | .                  | . | .      | . | . |
| Vv05g1297    | .            | .                  | .                  | . | .      | . | . |
| .            | .            | .                  | .                  | . | .      | . | . |
| Vv05g1298    | .            | .                  | .                  | . | .      | . | . |
| .            | .            | .                  | .                  | . | .      | . | . |
| Vv05g1299    | .            | .                  | .                  | . | .      | . | . |
| .            | .            | .                  | .                  | . | .      | . | . |
| Vv05g1300    | .            | .                  | .                  | . | .      | . | . |
| .            | .            | .                  | .                  | . | .      | . | . |
| Vv05g1301    | .            | .                  | .                  | . | .      | . | . |
| .            | .            | .                  | .                  | . | .      | . | . |
| Vv05g1302    | .            | .                  | .                  | . | .      | . | . |
| .            | .            | .                  | .                  | . | .      | . | . |
| Vv05g1303    | .            | .                  | .                  | . | .      | . | . |
| .            | .            | .                  | .                  | . | .      | . | . |
| Vv05g1304    | Tc04_g018280 | .                  | .                  | . | Gorai. | . | . |
| 011G147600.1 | .            | .                  | .                  | . | .      | . | . |
| .            | .            | .                  | .                  | . | .      | . | . |
| Vv05g1305    | .            | .                  | .                  | . | .      | . | . |
| .            | .            | .                  | .                  | . | .      | . | . |
| Vv05g1306    | .            | .                  | .                  | . | .      | . | . |
| .            | .            | .                  | .                  | . | .      | . | . |
| Vv05g1307    | .            | .                  | .                  | . | .      | . | . |
| .            | .            | .                  | .                  | . | .      | . | . |
| Vv05g1308    | Tc04_g018290 | .                  | .                  | . | Gorai. | . | . |
| 011G147400.1 | .            | .                  | .                  | . | .      | . | . |
| .            | .            | .                  | .                  | . | .      | . | . |
| Vv05g1309    | Tc04_g018330 | .                  | .                  | . | .      | . | . |
| .            | .            | .                  | .                  | . | .      | . | . |
| Vv05g1310    | .            | Gorai.006G224200.1 | .                  | . | .      | . | . |
| .            | .            | .                  | .                  | . | .      | . | . |
| Vv05g1311    | .            | .                  | .                  | . | .      | . | . |

|                                 |              |  |                    |  |                    |  |
|---------------------------------|--------------|--|--------------------|--|--------------------|--|
| Vv05g1312                       |              |  |                    |  |                    |  |
| Vv05g1313                       |              |  |                    |  |                    |  |
| Vv05g1314                       |              |  |                    |  |                    |  |
| Vv05g1315                       | Tc04_g018340 |  | Gorai.006G221200.1 |  |                    |  |
| Vv05g1316                       |              |  |                    |  |                    |  |
| Vv05g1317                       |              |  |                    |  |                    |  |
| Vv05g1318                       | Tc04_g018370 |  |                    |  |                    |  |
| Vv05g1319                       | Tc04_g018390 |  |                    |  |                    |  |
| Vv05g1320<br>011G147300.1       | Tc04_g018400 |  |                    |  | Gorai.             |  |
| Vv05g1321<br>Gorai.005G127200.1 | Tc04_g018430 |  | Gorai.005G020900.1 |  |                    |  |
| Vv05g1322                       | Tc04_g018440 |  |                    |  |                    |  |
| Vv05g1323<br>Gorai.011G147000.1 | Tc04_g018450 |  |                    |  | Gorai.005G127800.1 |  |
| Vv05g1324                       | Tc04_g018460 |  |                    |  |                    |  |
| Vv05g1325                       | Tc04_g018470 |  |                    |  |                    |  |
| Vv05g1326                       |              |  |                    |  |                    |  |
| Vv05g1327                       |              |  |                    |  |                    |  |

|                    |              |  |  |  |                    |  |  |
|--------------------|--------------|--|--|--|--------------------|--|--|
| Vv05g1328          |              |  |  |  |                    |  |  |
| Vv05g1329          |              |  |  |  |                    |  |  |
| Vv05g1330          |              |  |  |  |                    |  |  |
| Vv05g1331          |              |  |  |  |                    |  |  |
| Vv05g1332          |              |  |  |  |                    |  |  |
| Vv05g1333          |              |  |  |  |                    |  |  |
| Vv05g1334          |              |  |  |  |                    |  |  |
| Vv05g1335          |              |  |  |  |                    |  |  |
| Vv05g1336          |              |  |  |  |                    |  |  |
| Vv05g1337          |              |  |  |  |                    |  |  |
| Vv05g1338          |              |  |  |  | Gorai.011G143900.1 |  |  |
| Vv05g1339          |              |  |  |  | Gorai.011G144400.1 |  |  |
| Vv05g1340          |              |  |  |  | Gorai.011G144300.1 |  |  |
| Vv05g1341          | Tc04_g018700 |  |  |  |                    |  |  |
| Vv05g1342          |              |  |  |  | Gorai.005G128400.1 |  |  |
| Gorai.011G144200.1 |              |  |  |  |                    |  |  |
| Vv05g1343          |              |  |  |  | Gorai.005G128500.1 |  |  |
| Gorai.011G141500.1 |              |  |  |  |                    |  |  |

|           |              |  |  |  |  |  |  |
|-----------|--------------|--|--|--|--|--|--|
| Vv05g1344 |              |  |  |  |  |  |  |
| Vv05g1345 |              |  |  |  |  |  |  |
| Vv05g1346 |              |  |  |  |  |  |  |
| Vv05g1347 | Tc04_g020280 |  |  |  |  |  |  |
| Vv05g1348 |              |  |  |  |  |  |  |
| Vv05g1349 | Tc04_g020650 |  |  |  |  |  |  |
| Vv05g1350 |              |  |  |  |  |  |  |
| Vv05g1351 |              |  |  |  |  |  |  |
| Vv05g1352 |              |  |  |  |  |  |  |
| Vv05g1353 |              |  |  |  |  |  |  |
| Vv05g1354 |              |  |  |  |  |  |  |
| Vv05g1355 |              |  |  |  |  |  |  |
| Vv05g1356 |              |  |  |  |  |  |  |
| Vv05g1357 |              |  |  |  |  |  |  |
| Vv05g1358 |              |  |  |  |  |  |  |
| Vv05g1359 | Tc04_g018740 |  |  |  |  |  |  |



|           |              |   |   |   |   |   |
|-----------|--------------|---|---|---|---|---|
| Vv05g1360 | Tc04_g020680 | . | . | . | . | . |
| .         | .            | . | . | . | . | . |
| Vv05g1361 | .            | . | . | . | . | . |
| .         | .            | . | . | . | . | . |
| Vv05g1362 | .            | . | . | . | . | . |
| .         | .            | . | . | . | . | . |
| Vv05g1363 | .            | . | . | . | . | . |
| .         | .            | . | . | . | . | . |
| Vv05g1364 | Tc04_g018820 | . | . | . | . | . |
| .         | .            | . | . | . | . | . |
| Vv05g1365 | .            | . | . | . | . | . |
| .         | .            | . | . | . | . | . |
| Vv05g1366 | Tc04_g018830 | . | . | . | . | . |
| .         | .            | . | . | . | . | . |
| Vv05g1367 | Tc04_g018840 | . | . | . | . | . |
| .         | .            | . | . | . | . | . |
| Vv05g1368 | Tc04_g020940 | . | . | . | . | . |
| .         | .            | . | . | . | . | . |
| Vv05g1369 | .            | . | . | . | . | . |
| .         | .            | . | . | . | . | . |
| Vv05g1370 | .            | . | . | . | . | . |
| .         | .            | . | . | . | . | . |
| Vv05g1371 | Tc04_g018880 | . | . | . | . | . |
| .         | .            | . | . | . | . | . |
| Vv05g1372 | Tc04_g018890 | . | . | . | . | . |
| .         | .            | . | . | . | . | . |
| Vv05g1373 | .            | . | . | . | . | . |
| .         | .            | . | . | . | . | . |
| Vv05g1374 | .            | . | . | . | . | . |
| .         | .            | . | . | . | . | . |
| Vv05g1375 | .            | . | . | . | . | . |
| .         | .            | . | . | . | . | . |
| Vv05g1376 | Tc04_g018900 | . | . | . | . | . |
| .         | .            | . | . | . | . | . |

|              |              |   |   |   |                    |
|--------------|--------------|---|---|---|--------------------|
| Vv05g1377    | Tc04_g018910 | . | . | . | .                  |
| .            | .            | . | . | . | .                  |
| Vv05g1378    | .            | . | . | . | .                  |
| .            | .            | . | . | . | .                  |
| Vv05g1379    | .            | . | . | . | .                  |
| .            | .            | . | . | . | .                  |
| Vv05g1380    | Tc04_g018930 | . | . | . | Gorai.             |
| 011G144600.1 | .            | . | . | . | .                  |
| Vv05g1381    | Tc04_g019000 | . | . | . | .                  |
| .            | .            | . | . | . | .                  |
| Vv05g1382    | Tc04_g014440 | . | . | . | .                  |
| .            | .            | . | . | . | .                  |
| Vv05g1383    | Tc04_g014570 | . | . | . | .                  |
| .            | .            | . | . | . | .                  |
| Vv05g1384    | .            | . | . | . | .                  |
| .            | .            | . | . | . | .                  |
| Vv05g1385    | .            | . | . | . | .                  |
| .            | .            | . | . | . | .                  |
| Vv05g1386    | .            | . | . | . | .                  |
| .            | .            | . | . | . | .                  |
| Vv05g1387    | .            | . | . | . | Gorai.011G145300.1 |
| .            | .            | . | . | . | .                  |
| Vv05g1388    | .            | . | . | . | .                  |
| .            | .            | . | . | . | .                  |
| Vv05g1389    | .            | . | . | . | .                  |
| .            | .            | . | . | . | .                  |
| Vv05g1390    | .            | . | . | . | .                  |
| .            | .            | . | . | . | .                  |
| Vv05g1391    | .            | . | . | . | .                  |
| .            | .            | . | . | . | .                  |
| Vv05g1392    | .            | . | . | . | .                  |
| .            | .            | . | . | . | .                  |
| Vv05g1393    | .            | . | . | . | .                  |

|           |              |   |   |   |                    |   |   |
|-----------|--------------|---|---|---|--------------------|---|---|
| .         | .            | . | . | . | .                  | . | . |
| Vv05g1394 | .            | . | . | . | .                  | . | . |
| Vv05g1395 | .            | . | . | . | .                  | . | . |
| Vv05g1396 | .            | . | . | . | Gorai.011G145500.1 | . | . |
| Vv05g1397 | .            | . | . | . | .                  | . | . |
| Vv05g1398 | .            | . | . | . | .                  | . | . |
| Vv05g1399 | .            | . | . | . | .                  | . | . |
| Vv05g1400 | .            | . | . | . | .                  | . | . |
| Vv05g1401 | Tc04_g024840 | . | . | . | .                  | . | . |
| Vv05g1402 | .            | . | . | . | .                  | . | . |
| Vv05g1403 | .            | . | . | . | .                  | . | . |
| Vv05g1404 | .            | . | . | . | .                  | . | . |
| Vv05g1405 | .            | . | . | . | .                  | . | . |
| Vv05g1406 | .            | . | . | . | .                  | . | . |
| Vv05g1407 | .            | . | . | . | .                  | . | . |
| Vv05g1408 | .            | . | . | . | .                  | . | . |
| Vv05g1409 | .            | . | . | . | .                  | . | . |
| .         | .            | . | . | . | .                  | . | . |
| .         | .            | . | . | . | .                  | . | . |

|           |              |                    |   |   |   |   |   |
|-----------|--------------|--------------------|---|---|---|---|---|
| Vv05g1410 | .            | .                  | . | . | . | . | . |
| .         | .            | .                  | . | . | . | . | . |
| Vv05g1411 | .            | .                  | . | . | . | . | . |
| .         | .            | .                  | . | . | . | . | . |
| Vv05g1412 | .            | .                  | . | . | . | . | . |
| .         | .            | .                  | . | . | . | . | . |
| Vv05g1413 | .            | .                  | . | . | . | . | . |
| .         | .            | .                  | . | . | . | . | . |
| Vv05g1414 | .            | Gorai.006G186500.1 | . | . | . | . | . |
| .         | .            | .                  | . | . | . | . | . |
| Vv05g1415 | .            | .                  | . | . | . | . | . |
| .         | .            | .                  | . | . | . | . | . |
| Vv05g1416 | .            | .                  | . | . | . | . | . |
| .         | .            | .                  | . | . | . | . | . |
| Vv05g1417 | .            | .                  | . | . | . | . | . |
| .         | .            | .                  | . | . | . | . | . |
| Vv05g1418 | .            | .                  | . | . | . | . | . |
| .         | .            | .                  | . | . | . | . | . |
| Vv05g1419 | Tc04_g014820 | .                  | . | . | . | . | . |
| .         | .            | .                  | . | . | . | . | . |
| Vv05g1420 | Tc04_g014820 | .                  | . | . | . | . | . |
| .         | .            | .                  | . | . | . | . | . |
| Vv05g1421 | .            | .                  | . | . | . | . | . |
| .         | .            | .                  | . | . | . | . | . |
| Vv05g1422 | .            | .                  | . | . | . | . | . |
| .         | .            | .                  | . | . | . | . | . |
| Vv05g1423 | .            | .                  | . | . | . | . | . |
| .         | .            | .                  | . | . | . | . | . |
| Vv05g1424 | .            | .                  | . | . | . | . | . |
| .         | .            | .                  | . | . | . | . | . |
| Vv05g1425 | .            | .                  | . | . | . | . | . |
| .         | .            | .                  | . | . | . | . | . |
| Vv05g1426 | .            | .                  | . | . | . | . | . |
| .         | .            | .                  | . | . | . | . | . |

|           |                    |                    |   |   |   |   |   |
|-----------|--------------------|--------------------|---|---|---|---|---|
| Vv05g1427 | .                  | .                  | . | . | . | . | . |
| .         | .                  | .                  | . | . | . | . | . |
| Vv05g1428 | .                  | .                  | . | . | . | . | . |
| .         | .                  | .                  | . | . | . | . | . |
| Vv05g1429 | .                  | .                  | . | . | . | . | . |
| .         | .                  | .                  | . | . | . | . | . |
| Vv05g1430 | .                  | .                  | . | . | . | . | . |
| .         | .                  | .                  | . | . | . | . | . |
| Vv05g1431 | Tc04_g024710       | .                  | . | . | . | . | . |
| .         | .                  | .                  | . | . | . | . | . |
| Vv05g1432 | Tc04_g024690       | .                  | . | . | . | . | . |
| .         | .                  | .                  | . | . | . | . | . |
| Vv05g1433 | .                  | .                  | . | . | . | . | . |
| .         | .                  | .                  | . | . | . | . | . |
| Vv05g1434 | .                  | .                  | . | . | . | . | . |
| .         | .                  | .                  | . | . | . | . | . |
| Vv05g1435 | .                  | .                  | . | . | . | . | . |
| .         | .                  | .                  | . | . | . | . | . |
| Vv05g1436 | .                  | .                  | . | . | . | . | . |
| .         | .                  | .                  | . | . | . | . | . |
| Vv05g1437 | .                  | .                  | . | . | . | . | . |
| .         | .                  | .                  | . | . | . | . | . |
| Vv05g1438 | .                  | .                  | . | . | . | . | . |
| .         | .                  | .                  | . | . | . | . | . |
| Vv05g1439 | .                  | .                  | . | . | . | . | . |
| .         | .                  | .                  | . | . | . | . | . |
| Vv05g1440 | Gorai.006G186400.1 | .                  | . | . | . | . | . |
| .         | .                  | .                  | . | . | . | . | . |
| Vv05g1441 | Gorai.006G186300.1 | .                  | . | . | . | . | . |
| .         | .                  | .                  | . | . | . | . | . |
| Vv05g1442 | .                  | .                  | . | . | . | . | . |
| .         | .                  | .                  | . | . | . | . | . |
| Vv05g1443 | Tc04_g014980       | Gorai.006G186200.1 | . | . | . | . | . |

|           |              |                    |   |                    |   |   |   |
|-----------|--------------|--------------------|---|--------------------|---|---|---|
| .         | .            | .                  | . | .                  | . | . | . |
| Vv05g1444 | .            | .                  | . | .                  | . | . | . |
| .         | .            | .                  | . | .                  | . | . | . |
| Vv05g1445 | .            | Gorai.006G185900.1 | . | .                  | . | . | . |
| .         | .            | .                  | . | .                  | . | . | . |
| Vv05g1446 | .            | .                  | . | .                  | . | . | . |
| .         | .            | .                  | . | .                  | . | . | . |
| Vv05g1447 | .            | .                  | . | .                  | . | . | . |
| .         | .            | .                  | . | .                  | . | . | . |
| Vv05g1448 | Tc04_g014440 | .                  | . | .                  | . | . | . |
| .         | .            | .                  | . | .                  | . | . | . |
| Vv05g1449 | .            | Gorai.006G227400.1 | . | Gorai.005G019700.1 | . | . | . |
| .         | .            | .                  | . | .                  | . | . | . |
| .         | .            | .                  | . | .                  | . | . | . |
| Vv05g1450 | .            | .                  | . | .                  | . | . | . |
| .         | .            | .                  | . | .                  | . | . | . |
| Vv05g1451 | .            | .                  | . | .                  | . | . | . |
| .         | .            | .                  | . | .                  | . | . | . |
| Vv05g1452 | .            | .                  | . | .                  | . | . | . |
| .         | .            | .                  | . | .                  | . | . | . |
| Vv05g1453 | .            | .                  | . | .                  | . | . | . |
| .         | .            | .                  | . | .                  | . | . | . |
| Vv05g1454 | .            | .                  | . | .                  | . | . | . |
| .         | .            | .                  | . | .                  | . | . | . |
| Vv05g1455 | .            | .                  | . | .                  | . | . | . |
| .         | .            | .                  | . | .                  | . | . | . |
| Vv05g1456 | .            | .                  | . | .                  | . | . | . |
| .         | .            | .                  | . | .                  | . | . | . |
| Vv05g1457 | .            | .                  | . | .                  | . | . | . |
| .         | .            | .                  | . | .                  | . | . | . |
| Vv05g1458 | .            | .                  | . | .                  | . | . | . |
| .         | .            | .                  | . | .                  | . | . | . |
| Vv05g1459 | .            | .                  | . | .                  | . | . | . |
| .         | .            | .                  | . | .                  | . | . | . |

|                    |              |   |                    |   |                    |   |
|--------------------|--------------|---|--------------------|---|--------------------|---|
| Vv05g1460          | .            | . | Gorai.006G228200.1 | . | .                  | . |
| Gorai.011G143200.1 | .            | . | .                  | . | .                  | . |
| .                  | .            | . | .                  | . | .                  | . |
| Vv05g1461          | .            | . | .                  | . | Gorai.011G143100.1 | . |
| .                  | .            | . | .                  | . | .                  | . |
| Vv05g1462          | .            | . | .                  | . | Gorai.011G143000.1 | . |
| .                  | .            | . | .                  | . | .                  | . |
| Vv05g1463          | .            | . | Gorai.006G228300.1 | . | .                  | . |
| Gorai.011G142800.1 | .            | . | .                  | . | .                  | . |
| .                  | .            | . | .                  | . | .                  | . |
| Vv05g1464          | .            | . | .                  | . | Gorai.011G142600.1 | . |
| .                  | .            | . | .                  | . | .                  | . |
| Vv05g1465          | Tc04_g012740 | . | .                  | . | .                  | . |
| .                  | .            | . | .                  | . | .                  | . |
| Vv05g1466          | .            | . | .                  | . | .                  | . |
| .                  | .            | . | .                  | . | .                  | . |
| Vv05g1467          | .            | . | .                  | . | .                  | . |
| .                  | .            | . | .                  | . | .                  | . |
| Vv05g1468          | .            | . | .                  | . | .                  | . |
| .                  | .            | . | .                  | . | .                  | . |
| Vv05g1469          | .            | . | .                  | . | .                  | . |
| .                  | .            | . | .                  | . | .                  | . |
| Vv05g1470          | .            | . | .                  | . | .                  | . |
| .                  | .            | . | .                  | . | .                  | . |
| Vv05g1471          | Tc04_g014180 | . | Gorai.005G016900.1 | . | .                  | . |
| Gorai.011G142200.1 | .            | . | .                  | . | .                  | . |
| .                  | .            | . | .                  | . | .                  | . |
| Vv05g1472          | .            | . | .                  | . | .                  | . |
| .                  | .            | . | .                  | . | .                  | . |
| Vv05g1473          | .            | . | .                  | . | .                  | . |
| .                  | .            | . | .                  | . | .                  | . |
| Vv05g1474          | Tc04_g001390 | . | .                  | . | .                  | . |
| .                  | .            | . | .                  | . | .                  | . |
| Vv05g1475          | .            | . | .                  | . | .                  | . |

|           |              |  |                    |  |  |  |  |
|-----------|--------------|--|--------------------|--|--|--|--|
| Vv05g1476 |              |  |                    |  |  |  |  |
| Vv05g1477 |              |  |                    |  |  |  |  |
| Vv05g1478 |              |  |                    |  |  |  |  |
| Vv05g1479 |              |  |                    |  |  |  |  |
| Vv05g1480 |              |  |                    |  |  |  |  |
| Vv05g1481 |              |  |                    |  |  |  |  |
| Vv05g1482 |              |  |                    |  |  |  |  |
| Vv05g1483 |              |  | Gorai.005G016800.1 |  |  |  |  |
| Vv05g1484 |              |  |                    |  |  |  |  |
| Vv05g1485 |              |  |                    |  |  |  |  |
| Vv05g1486 |              |  |                    |  |  |  |  |
| Vv05g1487 | Tc04_g001590 |  |                    |  |  |  |  |
| Vv05g1488 |              |  |                    |  |  |  |  |
| Vv05g1489 |              |  |                    |  |  |  |  |
| Vv05g1490 |              |  |                    |  |  |  |  |
| Vv05g1491 |              |  |                    |  |  |  |  |



|                    |              |                    |                    |                    |   |
|--------------------|--------------|--------------------|--------------------|--------------------|---|
| Vv05g1492          | .            | .                  | Gorai.005G016700.1 | .                  | . |
| Gorai.011G141900.1 | .            | .                  | .                  | .                  | . |
| .                  | .            | .                  | .                  | .                  | . |
| Vv05g1493          | .            | .                  | .                  | .                  | . |
| .                  | .            | .                  | .                  | .                  | . |
| Vv05g1494          | Tc04_g001930 | .                  | Gorai.006G229000.1 | .                  | . |
| .                  | .            | .                  | .                  | .                  | . |
| Vv05g1495          | .            | Gorai.006G229100.1 | .                  | .                  | . |
| Gorai.011G141600.1 | .            | .                  | .                  | .                  | . |
| .                  | .            | .                  | .                  | .                  | . |
| Vv05g1496          | .            | .                  | .                  | Gorai.011G141500.1 | . |
| .                  | .            | .                  | .                  | .                  | . |
| Vv05g1497          | .            | .                  | Gorai.005G016400.1 | .                  | . |
| .                  | .            | .                  | .                  | .                  | . |
| Vv05g1498          | Tc04_g012450 | .                  | Gorai.006G229300.1 | .                  | . |
| .                  | .            | .                  | .                  | .                  | . |
| Vv05g1499          | .            | .                  | Gorai.005G016100.1 | .                  | . |
| .                  | .            | .                  | .                  | .                  | . |
| Vv05g1500          | .            | .                  | .                  | Gorai.011G140800.1 | . |
| .                  | .            | .                  | .                  | .                  | . |
| Vv05g1501          | .            | .                  | .                  | .                  | . |
| .                  | .            | .                  | .                  | .                  | . |
| Vv05g1502          | .            | .                  | .                  | .                  | . |
| .                  | .            | .                  | .                  | .                  | . |
| Vv05g1503          | .            | .                  | Gorai.005G040000.1 | .                  | . |
| .                  | Vv09g0113    | .                  | .                  | .                  | . |
| Vv05g1504          | .            | .                  | .                  | .                  | . |
| .                  | .            | .                  | .                  | .                  | . |
| Vv05g1505          | .            | .                  | Gorai.005G039900.1 | .                  | . |
| .                  | Vv09g0112    | .                  | .                  | .                  | . |
| Vv05g1506          | .            | .                  | .                  | .                  | . |
| .                  | .            | .                  | .                  | .                  | . |
| Vv05g1507          | .            | .                  | .                  | .                  | . |
| .                  | .            | .                  | .                  | .                  | . |
| .                  | .            | .                  | .                  | .                  | . |

|           |           |                    |   |   |   |
|-----------|-----------|--------------------|---|---|---|
| Vv05g1508 | .         | Gorai.006G229400.1 | . | . | . |
| .         | .         | .                  | . | . | . |
| Vv05g1509 | .         | .                  | . | . | . |
| .         | .         | .                  | . | . | . |
| Vv05g1510 | .         | Gorai.005G039800.1 | . | . | . |
| .         | Vv09g0110 | .                  | . | . | . |
| Vv05g1511 | .         | .                  | . | . | . |
| .         | .         | .                  | . | . | . |
| Vv05g1512 | .         | .                  | . | . | . |
| .         | .         | .                  | . | . | . |
| Vv05g1513 | .         | Gorai.005G039700.1 | . | . | . |
| .         | Vv09g0108 | .                  | . | . | . |
| Vv05g1514 | .         | .                  | . | . | . |
| .         | .         | .                  | . | . | . |
| Vv05g1515 | .         | .                  | . | . | . |
| .         | .         | .                  | . | . | . |
| Vv05g1516 | .         | Gorai.005G036700.1 | . | . | . |
| .         | .         | .                  | . | . | . |
| Vv05g1517 | .         | .                  | . | . | . |
| .         | .         | .                  | . | . | . |
| Vv05g1518 | .         | .                  | . | . | . |
| Vv09g0107 | .         | .                  | . | . | . |
| .         | .         | .                  | . | . | . |
| Vv05g1519 | .         | .                  | . | . | . |
| Vv09g0106 | .         | .                  | . | . | . |
| .         | .         | .                  | . | . | . |
| Vv05g1520 | .         | .                  | . | . | . |
| .         | .         | .                  | . | . | . |
| Vv05g1521 | .         | .                  | . | . | . |
| .         | .         | .                  | . | . | . |
| Vv05g1522 | .         | .                  | . | . | . |
| .         | .         | .                  | . | . | . |
| Vv05g1523 | .         | .                  | . | . | . |
| .         | .         | .                  | . | . | . |
| Vv05g1524 | .         | .                  | . | . | . |
| .         | .         | .                  | . | . | . |

|           |                    |   |                    |   |                    |   |   |
|-----------|--------------------|---|--------------------|---|--------------------|---|---|
| Vv05g1525 | .                  | . | .                  | . | .                  | . | . |
| .         | .                  | . | .                  | . | .                  | . | . |
| Vv05g1526 | .                  | . | .                  | . | .                  | . | . |
| .         | .                  | . | .                  | . | .                  | . | . |
| Vv05g1527 | .                  | . | .                  | . | .                  | . | . |
| .         | .                  | . | .                  | . | .                  | . | . |
| Vv05g1528 | .                  | . | .                  | . | .                  | . | . |
| .         | .                  | . | .                  | . | .                  | . | . |
| Vv05g1529 | Tc04_g002120       | . | .                  | . | .                  | . | . |
| .         | .                  | . | .                  | . | .                  | . | . |
| Vv05g1530 | .                  | . | .                  | . | Gorai.011G140700.1 | . | . |
| .         | .                  | . | .                  | . | .                  | . | . |
| Vv05g1531 | Gorai.006G229500.1 | . | .                  | . | Gorai.005G015900.1 | . | . |
| .         | Gorai.011G140400.1 | . | .                  | . | .                  | . | . |
| .         | .                  | . | .                  | . | .                  | . | . |
| Vv05g1532 | .                  | . | .                  | . | .                  | . | . |
| .         | .                  | . | .                  | . | .                  | . | . |
| Vv05g1533 | .                  | . | .                  | . | .                  | . | . |
| Vv09g0105 | Tc06_g010130       | . | .                  | . | .                  | . | . |
| .         | .                  | . | .                  | . | .                  | . | . |
| Vv05g1534 | .                  | . | .                  | . | .                  | . | . |
| .         | .                  | . | .                  | . | .                  | . | . |
| Vv05g1535 | .                  | . | Gorai.005G015800.1 | . | .                  | . | . |
| .         | .                  | . | .                  | . | .                  | . | . |
| Vv05g1536 | .                  | . | .                  | . | .                  | . | . |
| .         | .                  | . | .                  | . | .                  | . | . |
| Vv05g1537 | .                  | . | .                  | . | .                  | . | . |
| .         | .                  | . | .                  | . | .                  | . | . |
| Vv05g1538 | .                  | . | .                  | . | .                  | . | . |
| .         | .                  | . | .                  | . | .                  | . | . |
| Vv05g1539 | .                  | . | .                  | . | .                  | . | . |
| .         | .                  | . | .                  | . | .                  | . | . |
| Vv05g1540 | .                  | . | .                  | . | .                  | . | . |
| .         | .                  | . | .                  | . | .                  | . | . |
| .         | .                  | . | .                  | . | .                  | . | . |

|           |   |   |                    |                    |   |
|-----------|---|---|--------------------|--------------------|---|
| Vv05g1541 | . | . | Gorai.005G015700.1 | .                  | . |
| .         | . | . | .                  | .                  | . |
| Vv05g1542 | . | . | Gorai.005G015600.1 | .                  | . |
| .         | . | . | .                  | .                  | . |
| Vv05g1543 | . | . | Gorai.006G229600.1 | Gorai.005G015500.1 | . |
| .         | . | . | .                  | .                  | . |
| .         | . | . | .                  | .                  | . |
| Vv05g1544 | . | . | Gorai.005G015400.1 | .                  | . |
| .         | . | . | .                  | .                  | . |
| Vv05g1545 | . | . | Gorai.005G015300.1 | .                  | . |
| .         | . | . | .                  | .                  | . |
| Vv05g1546 | . | . | .                  | Gorai.011G139800.1 | . |
| .         | . | . | .                  | .                  | . |
| Vv05g1547 | . | . | .                  | .                  | . |
| .         | . | . | .                  | .                  | . |
| Vv05g1548 | . | . | .                  | .                  | . |
| .         | . | . | .                  | .                  | . |
| Vv05g1549 | . | . | Gorai.006G229800.1 | Gorai.005G014500.1 | . |
| .         | . | . | .                  | .                  | . |
| .         | . | . | .                  | .                  | . |
| Vv05g1550 | . | . | .                  | .                  | . |
| .         | . | . | .                  | .                  | . |
| Vv05g1551 | . | . | .                  | .                  | . |
| .         | . | . | .                  | .                  | . |
| Vv05g1552 | . | . | .                  | .                  | . |
| .         | . | . | .                  | .                  | . |
| Vv05g1553 | . | . | Gorai.006G229900.1 | .                  | . |
| .         | . | . | .                  | .                  | . |
| Vv05g1554 | . | . | .                  | .                  | . |
| .         | . | . | .                  | .                  | . |
| Vv05g1555 | . | . | .                  | .                  | . |
| .         | . | . | .                  | .                  | . |
| Vv05g1556 | . | . | .                  | .                  | . |
| .         | . | . | .                  | .                  | . |
| .         | . | . | .                  | .                  | . |

|                    |              |                    |                    |   |                    |   |
|--------------------|--------------|--------------------|--------------------|---|--------------------|---|
| Vv05g1557          | Tc04_g017880 | .                  | .                  | . | .                  | . |
| .                  | .            | .                  | .                  | . | .                  | . |
| .                  | .            | .                  | .                  | . | .                  | . |
| Vv05g1558          | .            | .                  | .                  | . | .                  | . |
| .                  | .            | .                  | .                  | . | .                  | . |
| .                  | .            | .                  | .                  | . | .                  | . |
| Vv05g1559          | .            | .                  | .                  | . | Gorai.011G139000.1 | . |
| .                  | .            | .                  | .                  | . | .                  | . |
| .                  | .            | .                  | .                  | . | .                  | . |
| Vv05g1560          | .            | .                  | .                  | . | Gorai.011G138900.1 | . |
| .                  | .            | .                  | .                  | . | .                  | . |
| .                  | .            | .                  | .                  | . | .                  | . |
| Vv05g1561          | Tc04_g017870 | .                  | .                  | . | Gorai.             | . |
| 011G138800.1       | .            | .                  | .                  | . | .                  | . |
| .                  | .            | .                  | .                  | . | .                  | . |
| Vv05g1562          | .            | .                  | .                  | . | .                  | . |
| .                  | .            | .                  | .                  | . | .                  | . |
| .                  | .            | .                  | .                  | . | .                  | . |
| Vv05g1563          | .            | .                  | Gorai.005G013500.1 | . | .                  | . |
| Gorai.011G138700.1 | .            | .                  | .                  | . | .                  | . |
| .                  | .            | .                  | .                  | . | .                  | . |
| .                  | .            | .                  | .                  | . | .                  | . |
| Vv05g1564          | .            | .                  | Gorai.005G013400.1 | . | .                  | . |
| .                  | .            | .                  | .                  | . | .                  | . |
| .                  | .            | .                  | .                  | . | .                  | . |
| Vv05g1565          | Tc04_g017830 | Gorai.006G230000.1 | .                  | . | .                  | . |
| .                  | .            | .                  | .                  | . | .                  | . |
| .                  | .            | .                  | .                  | . | .                  | . |
| Vv05g1566          | .            | .                  | .                  | . | .                  | . |
| .                  | .            | .                  | .                  | . | .                  | . |
| .                  | .            | .                  | .                  | . | .                  | . |
| Vv05g1567          | .            | .                  | .                  | . | .                  | . |
| .                  | .            | .                  | .                  | . | .                  | . |
| .                  | .            | .                  | .                  | . | .                  | . |
| Vv05g1568          | .            | .                  | .                  | . | Gorai.011G138600.1 | . |
| .                  | .            | .                  | .                  | . | .                  | . |
| .                  | .            | .                  | .                  | . | .                  | . |
| Vv05g1569          | Tc04_g002370 | .                  | .                  | . | .                  | . |
| .                  | .            | .                  | .                  | . | .                  | . |
| .                  | .            | .                  | .                  | . | .                  | . |
| Vv05g1570          | .            | .                  | .                  | . | .                  | . |
| .                  | .            | .                  | .                  | . | .                  | . |
| .                  | .            | .                  | .                  | . | .                  | . |
| Vv05g1571          | .            | .                  | .                  | . | .                  | . |
| .                  | .            | .                  | .                  | . | .                  | . |
| .                  | .            | .                  | .                  | . | .                  | . |
| Vv05g1572          | .            | .                  | .                  | . | .                  | . |
| .                  | .            | .                  | .                  | . | .                  | . |
| .                  | .            | .                  | .                  | . | .                  | . |
| Vv05g1573          | .            | .                  | .                  | . | .                  | . |

|                    |              |                    |   |   |   |                    |   |
|--------------------|--------------|--------------------|---|---|---|--------------------|---|
| .                  | .            | .                  | . | . | . | .                  | . |
| .                  | .            | .                  | . | . | . | .                  | . |
| Vv05g1574          | .            | .                  | . | . | . | .                  | . |
| .                  | .            | .                  | . | . | . | .                  | . |
| Vv05g1575          | .            | .                  | . | . | . | Gorai.011G137800.1 | . |
| .                  | .            | .                  | . | . | . | .                  | . |
| Vv05g1576          | .            | .                  | . | . | . | .                  | . |
| .                  | .            | .                  | . | . | . | .                  | . |
| Vv05g1577          | .            | .                  | . | . | . | .                  | . |
| .                  | .            | .                  | . | . | . | .                  | . |
| Vv05g1578          | .            | .                  | . | . | . | .                  | . |
| .                  | .            | .                  | . | . | . | .                  | . |
| Vv05g1579          | Tc04_g017710 | .                  | . | . | . | .                  | . |
| .                  | .            | .                  | . | . | . | .                  | . |
| Vv05g1580          | .            | Gorai.006G230300.1 | . | . | . | .                  | . |
| Gorai.011G137500.1 | .            | .                  | . | . | . | .                  | . |
| .                  | .            | .                  | . | . | . | .                  | . |
| Vv05g1581          | .            | .                  | . | . | . | .                  | . |
| .                  | .            | .                  | . | . | . | .                  | . |
| Vv05g1582          | .            | .                  | . | . | . | .                  | . |
| .                  | .            | .                  | . | . | . | .                  | . |
| Vv05g1583          | .            | Gorai.006G230400.1 | . | . | . | .                  | . |
| Gorai.011G137300.1 | .            | .                  | . | . | . | .                  | . |
| .                  | .            | .                  | . | . | . | .                  | . |
| Vv05g1584          | .            | .                  | . | . | . | .                  | . |
| .                  | .            | .                  | . | . | . | .                  | . |
| Vv05g1585          | .            | .                  | . | . | . | .                  | . |
| .                  | .            | .                  | . | . | . | .                  | . |
| Vv05g1586          | .            | Gorai.006G230600.1 | . | . | . | .                  | . |
| Gorai.011G137200.1 | .            | .                  | . | . | . | .                  | . |
| .                  | .            | .                  | . | . | . | .                  | . |
| Vv05g1587          | .            | .                  | . | . | . | .                  | . |
| .                  | .            | .                  | . | . | . | .                  | . |
| Vv05g1588          | .            | .                  | . | . | . | .                  | . |
| .                  | .            | .                  | . | . | . | .                  | . |
| .                  | .            | .                  | . | . | . | .                  | . |

|           |   |                    |   |   |   |   |   |
|-----------|---|--------------------|---|---|---|---|---|
| Vv05g1589 | . | .                  | . | . | . | . | . |
| .         | . | .                  | . | . | . | . | . |
| Vv05g1590 | . | Gorai.006G230700.1 | . | . | . | . | . |
| .         | . | .                  | . | . | . | . | . |
| Vv05g1591 | . | .                  | . | . | . | . | . |
| .         | . | .                  | . | . | . | . | . |
| Vv05g1592 | . | .                  | . | . | . | . | . |
| .         | . | .                  | . | . | . | . | . |
| Vv05g1593 | . | .                  | . | . | . | . | . |
| .         | . | .                  | . | . | . | . | . |
| Vv05g1594 | . | .                  | . | . | . | . | . |
| .         | . | .                  | . | . | . | . | . |
| Vv05g1595 | . | .                  | . | . | . | . | . |
| .         | . | .                  | . | . | . | . | . |
| Vv05g1596 | . | .                  | . | . | . | . | . |
| .         | . | .                  | . | . | . | . | . |
| Vv05g1597 | . | .                  | . | . | . | . | . |
| .         | . | .                  | . | . | . | . | . |
| Vv05g1598 | . | .                  | . | . | . | . | . |
| .         | . | .                  | . | . | . | . | . |
| Vv05g1599 | . | .                  | . | . | . | . | . |
| .         | . | .                  | . | . | . | . | . |
| Vv05g1600 | . | .                  | . | . | . | . | . |
| .         | . | .                  | . | . | . | . | . |
| Vv05g1601 | . | .                  | . | . | . | . | . |
| .         | . | .                  | . | . | . | . | . |
| Vv05g1602 | . | .                  | . | . | . | . | . |
| .         | . | .                  | . | . | . | . | . |
| Vv05g1603 | . | .                  | . | . | . | . | . |
| .         | . | .                  | . | . | . | . | . |
| Vv05g1604 | . | .                  | . | . | . | . | . |
| .         | . | .                  | . | . | . | . | . |
| Vv05g1605 | . | .                  | . | . | . | . | . |
| .         | . | .                  | . | . | . | . | . |

|                    |                    |                    |                    |   |   |        |   |
|--------------------|--------------------|--------------------|--------------------|---|---|--------|---|
| Vv05g1606          | .                  | .                  | .                  | . | . | .      | . |
| .                  | .                  | .                  | .                  | . | . | .      | . |
| Vv05g1607          | .                  | .                  | .                  | . | . | .      | . |
| .                  | .                  | .                  | .                  | . | . | .      | . |
| Vv05g1608          | .                  | .                  | .                  | . | . | .      | . |
| .                  | .                  | .                  | .                  | . | . | .      | . |
| Vv05g1609          | Tc04_g017690       | .                  | .                  | . | . | .      | . |
| .                  | .                  | .                  | .                  | . | . | .      | . |
| Vv05g1610          | .                  | .                  | .                  | . | . | .      | . |
| .                  | .                  | .                  | .                  | . | . | .      | . |
| Vv05g1611          | Tc04_g017640       | .                  | .                  | . | . | Gorai. | . |
| 011G136700.1       | .                  | .                  | .                  | . | . | .      | . |
| Vv05g1612          | .                  | .                  | Gorai.005G012500.1 | . | . | .      | . |
| .                  | .                  | .                  | .                  | . | . | .      | . |
| Vv05g1613          | Tc04_g017620       | .                  | .                  | . | . | Gorai. | . |
| 011G136400.1       | .                  | .                  | .                  | . | . | .      | . |
| Vv05g1614          | Tc04_g017610       | .                  | Gorai.005G012400.1 | . | . | .      | . |
| Gorai.011G135700.1 | .                  | .                  | .                  | . | . | .      | . |
| .                  | .                  | .                  | .                  | . | . | .      | . |
| Vv05g1615          | Tc04_g017600       | .                  | .                  | . | . | .      | . |
| .                  | .                  | .                  | .                  | . | . | .      | . |
| Vv05g1616          | Tc04_g017590       | .                  | .                  | . | . | .      | . |
| .                  | .                  | .                  | .                  | . | . | .      | . |
| Vv05g1617          | .                  | .                  | Gorai.005G012300.1 | . | . | .      | . |
| Gorai.011G135600.1 | .                  | .                  | .                  | . | . | .      | . |
| .                  | .                  | .                  | .                  | . | . | .      | . |
| Vv05g1618          | Tc04_g017580       | .                  | .                  | . | . | Gorai. | . |
| 011G135500.1       | .                  | .                  | .                  | . | . | .      | . |
| Vv05g1619          | Tc04_g017570       | .                  | .                  | . | . | Gorai. | . |
| 011G135400.1       | .                  | .                  | .                  | . | . | .      | . |
| Vv05g1620          | Tc04_g017560       | Gorai.006G231900.1 | .                  | . | . | Gorai. | . |
| 005G012200.1       | Gorai.011G135300.1 | .                  | .                  | . | . | .      | . |
| .                  | .                  | .                  | .                  | . | . | .      | . |
| Vv05g1621          | Tc04_g017540       | .                  | .                  | . | . | .      | . |



|              |              |   |   |   |                    |   |
|--------------|--------------|---|---|---|--------------------|---|
| .            | .            | . | . | . | .                  | . |
| .            | .            | . | . | . | .                  | . |
| Vv05g1622    | Tc04_g017520 | . | . | . | Gorai.             | . |
| 011G135200.1 | .            | . | . | . | .                  | . |
| .            | .            | . | . | . | .                  | . |
| Vv05g1623    | .            | . | . | . | .                  | . |
| .            | .            | . | . | . | .                  | . |
| .            | .            | . | . | . | .                  | . |
| Vv05g1624    | Tc04_g017510 | . | . | . | Gorai.             | . |
| 011G135100.1 | .            | . | . | . | .                  | . |
| .            | .            | . | . | . | .                  | . |
| Vv05g1625    | .            | . | . | . | .                  | . |
| .            | .            | . | . | . | .                  | . |
| .            | .            | . | . | . | .                  | . |
| Vv05g1626    | .            | . | . | . | .                  | . |
| .            | .            | . | . | . | .                  | . |
| .            | .            | . | . | . | .                  | . |
| Vv05g1627    | .            | . | . | . | .                  | . |
| .            | .            | . | . | . | .                  | . |
| .            | .            | . | . | . | .                  | . |
| Vv05g1628    | .            | . | . | . | .                  | . |
| .            | .            | . | . | . | .                  | . |
| .            | .            | . | . | . | .                  | . |
| Vv05g1629    | .            | . | . | . | .                  | . |
| .            | .            | . | . | . | .                  | . |
| .            | .            | . | . | . | .                  | . |
| Vv05g1630    | .            | . | . | . | Gorai.011G134800.1 | . |
| .            | .            | . | . | . | .                  | . |
| .            | .            | . | . | . | .                  | . |
| Vv05g1631    | .            | . | . | . | .                  | . |
| .            | .            | . | . | . | .                  | . |
| .            | .            | . | . | . | .                  | . |
| Vv05g1632    | .            | . | . | . | .                  | . |
| .            | .            | . | . | . | .                  | . |
| .            | .            | . | . | . | .                  | . |
| Vv05g1633    | .            | . | . | . | .                  | . |
| .            | .            | . | . | . | .                  | . |
| .            | .            | . | . | . | .                  | . |
| Vv05g1634    | .            | . | . | . | .                  | . |
| .            | .            | . | . | . | .                  | . |
| .            | .            | . | . | . | .                  | . |
| Vv05g1635    | .            | . | . | . | .                  | . |
| .            | .            | . | . | . | .                  | . |
| .            | .            | . | . | . | .                  | . |
| Vv05g1636    | .            | . | . | . | .                  | . |
| .            | .            | . | . | . | .                  | . |
| .            | .            | . | . | . | .                  | . |
| Vv05g1637    | .            | . | . | . | .                  | . |
| .            | .            | . | . | . | .                  | . |
| .            | .            | . | . | . | .                  | . |

|                    |              |                    |        |   |   |        |   |
|--------------------|--------------|--------------------|--------|---|---|--------|---|
| Vv05g1638          | .            | .                  | .      | . | . | .      | . |
| .                  | .            | .                  | .      | . | . | .      | . |
| Vv05g1639          | .            | .                  | .      | . | . | .      | . |
| .                  | .            | .                  | .      | . | . | .      | . |
| Vv05g1640          | .            | .                  | .      | . | . | .      | . |
| .                  | .            | .                  | .      | . | . | .      | . |
| Vv05g1641          | .            | .                  | .      | . | . | .      | . |
| .                  | .            | .                  | .      | . | . | .      | . |
| Vv05g1642          | Tc04_g017480 | .                  | .      | . | . | Gorai. | . |
| 011G134700.1       | .            | .                  | .      | . | . | .      | . |
| .                  | .            | .                  | .      | . | . | .      | . |
| Vv05g1643          | .            | .                  | .      | . | . | .      | . |
| .                  | .            | .                  | .      | . | . | .      | . |
| Vv05g1644          | Tc04_g017470 | .                  | .      | . | . | Gorai. | . |
| 011G134500.1       | .            | .                  | .      | . | . | .      | . |
| .                  | .            | .                  | .      | . | . | .      | . |
| Vv05g1645          | Tc04_g017460 | Gorai.006G232200.1 | .      | . | . | .      | . |
| .                  | .            | .                  | .      | . | . | .      | . |
| Vv05g1646          | .            | .                  | .      | . | . | .      | . |
| .                  | .            | .                  | .      | . | . | .      | . |
| Vv05g1647          | .            | .                  | .      | . | . | .      | . |
| .                  | .            | .                  | .      | . | . | .      | . |
| Vv05g1648          | Tc04_g017430 | .                  | .      | . | . | Gorai. | . |
| 011G134300.1       | .            | .                  | .      | . | . | .      | . |
| .                  | .            | .                  | .      | . | . | .      | . |
| Vv05g1649          | Tc04_g017410 | .                  | .      | . | . | .      | . |
| .                  | .            | .                  | .      | . | . | .      | . |
| Vv05g1650          | Tc04_g017380 | Gorai.006G232500.1 | .      | . | . | .      | . |
| Gorai.011G133900.1 | .            | .                  | .      | . | . | .      | . |
| .                  | .            | .                  | .      | . | . | .      | . |
| Vv05g1651          | Tc04_g017360 | Gorai.006G232600.1 | Gorai. | . | . | .      | . |
| 005G010100.1       | .            | .                  | .      | . | . | .      | . |
| .                  | .            | .                  | .      | . | . | .      | . |
| Vv05g1652          | .            | .                  | .      | . | . | .      | . |
| .                  | .            | .                  | .      | . | . | .      | . |
| Vv05g1653          | Tc04_g017350 | .                  | .      | . | . | Gorai. | . |
| 011G133700.1       | .            | .                  | .      | . | . | .      | . |
| .                  | .            | .                  | .      | . | . | .      | . |

|                                 |              |   |                    |   |        |
|---------------------------------|--------------|---|--------------------|---|--------|
| Vv05g1654<br>011G133600.1       | Tc04_g017340 | . | .                  | . | Gorai. |
| .                               | .            | . | .                  | . | .      |
| Vv05g1655<br>011G132900.1       | Tc04_g017290 | . | .                  | . | Gorai. |
| .                               | .            | . | .                  | . | .      |
| Vv05g1656<br>011G132800.1       | Tc04_g017280 | . | .                  | . | Gorai. |
| .                               | .            | . | .                  | . | .      |
| Vv05g1657<br>011G132700.1       | Tc04_g017270 | . | .                  | . | Gorai. |
| .                               | .            | . | .                  | . | .      |
| Vv05g1658<br>Gorai.011G132600.1 | Tc04_g017260 | . | Gorai.005G008700.1 | . | .      |
| .                               | .            | . | .                  | . | .      |
| .                               | .            | . | .                  | . | .      |
| Vv05g1659<br>011G132500.1       | Tc04_g017250 | . | .                  | . | Gorai. |
| .                               | .            | . | .                  | . | .      |
| Vv05g1660                       | .            | . | .                  | . | .      |
| .                               | .            | . | .                  | . | .      |
| Vv05g1661                       | Tc04_g017120 | . | Gorai.005G008300.1 | . | .      |
| .                               | .            | . | .                  | . | .      |
| Vv05g1662                       | .            | . | .                  | . | .      |
| .                               | .            | . | .                  | . | .      |
| Vv05g1663                       | Tc04_g017090 | . | Gorai.005G008100.1 | . | .      |
| .                               | .            | . | .                  | . | .      |
| Vv05g1664                       | Tc04_g018940 | . | .                  | . | .      |
| .                               | .            | . | .                  | . | .      |
| Vv05g1665                       | .            | . | .                  | . | .      |
| .                               | .            | . | .                  | . | .      |
| Vv05g1666                       | .            | . | .                  | . | .      |
| .                               | .            | . | .                  | . | .      |
| Vv05g1667                       | Tc04_g017080 | . | Gorai.005G008000.1 | . | .      |
| .                               | .            | . | .                  | . | .      |
| Vv05g1668                       | Tc04_g017060 | . | Gorai.005G007900.1 | . | .      |
| .                               | .            | . | .                  | . | .      |
| Vv05g1669                       | .            | . | .                  | . | .      |
| .                               | .            | . | .                  | . | .      |
| Vv05g1670                       | Tc04_g017050 | . | .                  | . | .      |



|           |              |                    |                    |   |
|-----------|--------------|--------------------|--------------------|---|
| Vv05g1686 | Tc04_g016970 | .                  | Gorai.005G007400.1 | . |
| .         | .            | .                  | .                  | . |
| .         | .            | .                  | .                  | . |
| Vv05g1687 | Tc04_g016960 | .                  | Gorai.005G007100.1 | . |
| .         | .            | .                  | .                  | . |
| .         | .            | .                  | .                  | . |
| Vv05g1688 | Tc04_g016950 | .                  | Gorai.005G006800.1 | . |
| .         | .            | .                  | .                  | . |
| .         | .            | .                  | .                  | . |
| Vv05g1689 | Tc04_g016930 | .                  | Gorai.005G004800.1 | . |
| .         | .            | .                  | .                  | . |
| .         | .            | .                  | .                  | . |
| Vv05g1690 | Tc04_g016920 | .                  | .                  | . |
| .         | .            | .                  | .                  | . |
| .         | .            | .                  | .                  | . |
| Vv05g1691 | .            | .                  | .                  | . |
| .         | .            | .                  | .                  | . |
| .         | .            | .                  | .                  | . |
| Vv05g1692 | Tc04_g019170 | Gorai.006G228400.1 | .                  | . |
| .         | .            | .                  | .                  | . |
| .         | .            | .                  | .                  | . |
| Vv05g1693 | .            | .                  | .                  | . |
| .         | .            | .                  | .                  | . |
| .         | .            | .                  | .                  | . |
| Vv05g1694 | .            | .                  | .                  | . |
| .         | .            | .                  | .                  | . |
| .         | .            | .                  | .                  | . |
| Vv05g1695 | .            | .                  | .                  | . |
| .         | .            | .                  | .                  | . |
| .         | .            | .                  | .                  | . |
| Vv05g1696 | .            | .                  | .                  | . |
| .         | .            | .                  | .                  | . |
| .         | .            | .                  | .                  | . |
| Vv05g1697 | .            | .                  | .                  | . |
| .         | .            | .                  | .                  | . |
| .         | .            | .                  | .                  | . |
| Vv05g1698 | .            | .                  | .                  | . |
| .         | .            | .                  | .                  | . |
| .         | .            | .                  | .                  | . |
| Vv05g1699 | .            | .                  | .                  | . |
| .         | .            | .                  | .                  | . |
| .         | .            | .                  | .                  | . |
| Vv05g1700 | .            | .                  | .                  | . |
| .         | .            | .                  | .                  | . |
| .         | .            | .                  | .                  | . |
| Vv05g1701 | .            | .                  | .                  | . |
| .         | .            | .                  | .                  | . |
| .         | .            | .                  | .                  | . |
| Vv05g1702 | .            | .                  | .                  | . |
| .         | .            | .                  | .                  | . |

|           |              |   |   |   |   |   |   |
|-----------|--------------|---|---|---|---|---|---|
| Vv05g1703 | .            | . | . | . | . | . | . |
| .         | .            | . | . | . | . | . | . |
| Vv05g1704 | .            | . | . | . | . | . | . |
| .         | .            | . | . | . | . | . | . |
| Vv05g1705 | .            | . | . | . | . | . | . |
| .         | .            | . | . | . | . | . | . |
| Vv05g1706 | Tc04_g019180 | . | . | . | . | . | . |
| .         | .            | . | . | . | . | . | . |
| Vv05g1707 | .            | . | . | . | . | . | . |
| .         | .            | . | . | . | . | . | . |
| Vv05g1708 | .            | . | . | . | . | . | . |
| .         | .            | . | . | . | . | . | . |
| Vv05g1709 | .            | . | . | . | . | . | . |
| .         | .            | . | . | . | . | . | . |
| Vv05g1710 | .            | . | . | . | . | . | . |
| .         | .            | . | . | . | . | . | . |
| Vv05g1711 | .            | . | . | . | . | . | . |
| .         | .            | . | . | . | . | . | . |
| Vv05g1712 | .            | . | . | . | . | . | . |
| .         | .            | . | . | . | . | . | . |
| Vv05g1713 | .            | . | . | . | . | . | . |
| .         | .            | . | . | . | . | . | . |
| Vv05g1714 | .            | . | . | . | . | . | . |
| .         | .            | . | . | . | . | . | . |
| Vv05g1715 | .            | . | . | . | . | . | . |
| .         | .            | . | . | . | . | . | . |
| Vv05g1716 | .            | . | . | . | . | . | . |
| .         | .            | . | . | . | . | . | . |
| Vv05g1717 | .            | . | . | . | . | . | . |
| .         | .            | . | . | . | . | . | . |
| Vv05g1718 | .            | . | . | . | . | . | . |
| .         | .            | . | . | . | . | . | . |
| Vv05g1719 | .            | . | . | . | . | . | . |

|           |   |   |   |   |   |   |   |
|-----------|---|---|---|---|---|---|---|
| .         | . | . | . | . | . | . | . |
| Vv05g1720 | . | . | . | . | . | . | . |
| .         | . | . | . | . | . | . | . |
| Vv05g1721 | . | . | . | . | . | . | . |
| .         | . | . | . | . | . | . | . |
| Vv05g1722 | . | . | . | . | . | . | . |
| .         | . | . | . | . | . | . | . |
| Vv05g1723 | . | . | . | . | . | . | . |
| .         | . | . | . | . | . | . | . |
| Vv05g1724 | . | . | . | . | . | . | . |
| .         | . | . | . | . | . | . | . |
| Vv05g1725 | . | . | . | . | . | . | . |
| .         | . | . | . | . | . | . | . |
| Vv05g1726 | . | . | . | . | . | . | . |
| .         | . | . | . | . | . | . | . |
| Vv05g1727 | . | . | . | . | . | . | . |
| .         | . | . | . | . | . | . | . |
| Vv05g1728 | . | . | . | . | . | . | . |
| .         | . | . | . | . | . | . | . |
| Vv05g1729 | . | . | . | . | . | . | . |
| .         | . | . | . | . | . | . | . |
| Vv05g1730 | . | . | . | . | . | . | . |
| .         | . | . | . | . | . | . | . |
| Vv05g1731 | . | . | . | . | . | . | . |
| .         | . | . | . | . | . | . | . |
| Vv05g1732 | . | . | . | . | . | . | . |
| .         | . | . | . | . | . | . | . |
| Vv05g1733 | . | . | . | . | . | . | . |
| .         | . | . | . | . | . | . | . |
| Vv05g1734 | . | . | . | . | . | . | . |
| .         | . | . | . | . | . | . | . |
| Vv05g1735 | . | . | . | . | . | . | . |
| .         | . | . | . | . | . | . | . |
| .         | . | . | . | . | . | . | . |





|              |                    |   |   |                    |   |        |   |
|--------------|--------------------|---|---|--------------------|---|--------|---|
| Vv06g0005    | .                  | . | . | .                  | . | .      | . |
| .            | .                  | . | . | .                  | . | .      | . |
| Vv06g0006    | Tc09_g032790       | . | . | .                  | . | .      | . |
| .            | .                  | . | . | .                  | . | .      | . |
| Vv06g0007    | .                  | . | . | .                  | . | .      | . |
| .            | .                  | . | . | .                  | . | .      | . |
| Vv06g0008    | .                  | . | . | .                  | . | .      | . |
| .            | .                  | . | . | .                  | . | .      | . |
| Vv06g0009    | .                  | . | . | .                  | . | .      | . |
| .            | .                  | . | . | .                  | . | .      | . |
| Vv06g0010    | Gorai.013G248500.1 | . | . | .                  | . | .      | . |
| .            | .                  | . | . | .                  | . | .      | . |
| Vv06g0011    | .                  | . | . | .                  | . | Gorai. | . |
| 003G154600.1 | .                  | . | . | .                  | . | .      | . |
| Vv06g0012    | Tc09_g018800       | . | . | .                  | . | Gorai. | . |
| 009G003200.1 | .                  | . | . | .                  | . | .      | . |
| Vv06g0013    | Tc09_g032740       | . | . | .                  | . | .      | . |
| .            | .                  | . | . | .                  | . | .      | . |
| Vv06g0014    | .                  | . | . | Gorai.004G019900.1 | . | .      | . |
| .            | .                  | . | . | .                  | . | .      | . |
| Vv06g0015    | .                  | . | . | .                  | . | .      | . |
| .            | .                  | . | . | .                  | . | .      | . |
| Vv06g0016    | .                  | . | . | .                  | . | .      | . |
| .            | .                  | . | . | .                  | . | .      | . |
| Vv06g0017    | .                  | . | . | .                  | . | .      | . |
| .            | .                  | . | . | .                  | . | .      | . |
| Vv06g0018    | .                  | . | . | .                  | . | .      | . |
| .            | .                  | . | . | .                  | . | .      | . |
| Vv06g0019    | .                  | . | . | .                  | . | .      | . |
| .            | .                  | . | . | .                  | . | .      | . |
| Vv06g0020    | .                  | . | . | .                  | . | .      | . |
| .            | .                  | . | . | .                  | . | .      | . |
| Vv06g0021    | .                  | . | . | Gorai.004G020100.1 | . | .      | . |

|                    |                    |                    |        |                    |        |   |
|--------------------|--------------------|--------------------|--------|--------------------|--------|---|
|                    | Gorai.003G154400.1 | .                  | .      | .                  | .      | . |
| .                  | .                  | .                  | .      | .                  | .      | . |
| Vv06g0022          | Tc09_g018480       | .                  | .      | .                  | .      | . |
| Gorai.003G129300.1 | .                  | .                  | .      | .                  | .      | . |
| .                  | .                  | .                  | .      | .                  | .      | . |
| Vv06g0023          | Tc09_g018470       | .                  | .      | .                  | .      | . |
| Gorai.003G154200.1 | Vv08g1698          | Tc05_g024670       | Gorai. | .                  | .      | . |
| 013G117600.1       | .                  | .                  | .      | .                  | .      | . |
| .                  | .                  | .                  | .      | .                  | .      | . |
| Vv06g0024          | Tc09_g018460       | Gorai.013G245500.1 | .      | .                  | .      | . |
| Gorai.004G020200.1 | .                  | .                  | .      | .                  | .      | . |
| .                  | .                  | .                  | .      | .                  | .      | . |
| .                  | .                  | .                  | .      | .                  | .      | . |
| Vv06g0025          | .                  | .                  | .      | .                  | .      | . |
| .                  | .                  | .                  | .      | .                  | .      | . |
| .                  | .                  | .                  | .      | .                  | .      | . |
| Vv06g0026          | .                  | .                  | .      | .                  | .      | . |
| .                  | .                  | .                  | .      | .                  | .      | . |
| .                  | .                  | .                  | .      | .                  | .      | . |
| Vv06g0027          | Tc09_g018450       | .                  | .      | Gorai.004G020300.1 | .      | . |
| .                  | .                  | .                  | .      | .                  | .      | . |
| .                  | .                  | .                  | .      | .                  | .      | . |
| Vv06g0028          | .                  | .                  | .      | .                  | .      | . |
| .                  | .                  | .                  | .      | .                  | .      | . |
| .                  | .                  | .                  | .      | .                  | .      | . |
| Vv06g0029          | Tc09_g018430       | .                  | .      | .                  | .      | . |
| .                  | .                  | .                  | .      | .                  | .      | . |
| .                  | .                  | .                  | .      | .                  | .      | . |
| Vv06g0030          | Tc09_g020730       | .                  | .      | Gorai.004G020600.1 | .      | . |
| .                  | .                  | .                  | .      | .                  | .      | . |
| .                  | .                  | .                  | .      | .                  | .      | . |
| Vv06g0031          | .                  | .                  | .      | .                  | .      | . |
| .                  | .                  | .                  | .      | .                  | .      | . |
| .                  | .                  | .                  | .      | .                  | .      | . |
| Vv06g0032          | .                  | .                  | .      | .                  | .      | . |
| .                  | .                  | .                  | .      | .                  | .      | . |
| .                  | .                  | .                  | .      | .                  | .      | . |
| Vv06g0033          | .                  | .                  | .      | .                  | .      | . |
| .                  | .                  | .                  | .      | .                  | .      | . |
| .                  | .                  | .                  | .      | .                  | .      | . |
| Vv06g0034          | .                  | .                  | .      | .                  | .      | . |
| .                  | .                  | .                  | .      | .                  | .      | . |
| .                  | .                  | .                  | .      | .                  | .      | . |
| Vv06g0035          | Tc09_g034740       | .                  | .      | .                  | .      | . |
| Gorai.003G150700.1 | .                  | .                  | .      | .                  | .      | . |
| .                  | .                  | .                  | .      | .                  | .      | . |
| Vv06g0036          | .                  | .                  | .      | .                  | .      | . |
| Vv08g1683          | .                  | .                  | .      | .                  | Gorai. | . |
| 007G343600.1       | .                  | .                  | .      | .                  | .      | . |

|              |                    |   |   |                    |   |        |   |
|--------------|--------------------|---|---|--------------------|---|--------|---|
| Vv06g0037    | .                  | . | . | .                  | . | Gorai. | . |
| 003G129200.1 | Vv08g1681          | . | . | .                  | . | .      | . |
| .            | .                  | . | . | .                  | . | .      | . |
| Vv06g0038    | .                  | . | . | .                  | . | .      | . |
| .            | .                  | . | . | .                  | . | .      | . |
| Vv06g0039    | Tc09_g020720       | . | . | .                  | . | .      | . |
| .            | .                  | . | . | .                  | . | .      | . |
| Vv06g0040    | .                  | . | . | .                  | . | .      | . |
| .            | .                  | . | . | .                  | . | .      | . |
| Vv06g0041    | .                  | . | . | .                  | . | .      | . |
| .            | .                  | . | . | .                  | . | .      | . |
| Vv06g0042    | Tc09_g004160       | . | . | Gorai.001G026700.1 | . | .      | . |
|              | Gorai.009G049000.1 | . | . | .                  | . | .      | . |
| .            | .                  | . | . | .                  | . | .      | . |
| Vv06g0043    | Tc09_g004330       | . | . | Gorai.001G026000.1 | . | .      | . |
|              | Gorai.009G048200.1 | . | . | .                  | . | .      | . |
| .            | .                  | . | . | .                  | . | .      | . |
| Vv06g0044    | .                  | . | . | .                  | . | .      | . |
| .            | .                  | . | . | .                  | . | .      | . |
| Vv06g0045    | .                  | . | . | .                  | . | .      | . |
| .            | .                  | . | . | .                  | . | .      | . |
| Vv06g0046    | .                  | . | . | .                  | . | .      | . |
| .            | .                  | . | . | .                  | . | .      | . |
| Vv06g0047    | .                  | . | . | .                  | . | .      | . |
| .            | .                  | . | . | .                  | . | .      | . |
| Vv06g0048    | .                  | . | . | .                  | . | .      | . |
| .            | .                  | . | . | .                  | . | .      | . |
| Vv06g0049    | .                  | . | . | .                  | . | .      | . |
| .            | .                  | . | . | .                  | . | .      | . |
| Vv06g0050    | .                  | . | . | .                  | . | .      | . |
| .            | .                  | . | . | .                  | . | .      | . |
| Vv06g0051    | .                  | . | . | .                  | . | .      | . |
| .            | .                  | . | . | .                  | . | .      | . |
| Vv06g0052    | .                  | . | . | Gorai.004G020700.1 | . | .      | . |
| .            | .                  | . | . | .                  | . | .      | . |
| .            | .                  | . | . | .                  | . | .      | . |

|              |                    |                    |                    |   |   |        |   |
|--------------|--------------------|--------------------|--------------------|---|---|--------|---|
| Vv06g0053    | .                  | .                  | .                  | . | . | .      | . |
| .            | .                  | .                  | .                  | . | . | .      | . |
| Vv06g0054    | Tc09_g004530       | .                  | .                  | . | . | .      | . |
| .            | .                  | .                  | .                  | . | . | .      | . |
| Vv06g0055    | .                  | .                  | .                  | . | . | Gorai. | . |
| 003G153800.1 | .                  | .                  | .                  | . | . | .      | . |
| Vv06g0056    | Tc09_g004560       | .                  | Gorai.001G023800.1 | . | . | .      | . |
|              | Gorai.009G047000.1 | Gorai.003G150800.1 | Vv08g1672          | . | . | .      | . |
|              | Tc05_g024270       | Gorai.013G115700.1 | .                  | . | . | .      | . |
| Vv06g0057    | .                  | .                  | .                  | . | . | .      | . |
| .            | .                  | .                  | .                  | . | . | .      | . |
| Vv06g0058    | .                  | .                  | .                  | . | . | .      | . |
| .            | .                  | .                  | .                  | . | . | .      | . |
| Vv06g0059    | .                  | .                  | .                  | . | . | .      | . |
| .            | .                  | .                  | .                  | . | . | .      | . |
| Vv06g0060    | .                  | .                  | .                  | . | . | .      | . |
| .            | .                  | .                  | .                  | . | . | .      | . |
| Vv06g0061    | .                  | .                  | .                  | . | . | .      | . |
| .            | .                  | .                  | .                  | . | . | .      | . |
| Vv06g0062    | .                  | .                  | .                  | . | . | .      | . |
| .            | .                  | .                  | .                  | . | . | .      | . |
| Vv06g0063    | .                  | .                  | .                  | . | . | .      | . |
| .            | .                  | .                  | .                  | . | . | .      | . |
| Vv06g0064    | .                  | .                  | .                  | . | . | .      | . |
| .            | .                  | .                  | .                  | . | . | .      | . |
| Vv06g0065    | .                  | .                  | .                  | . | . | .      | . |
| .            | .                  | .                  | .                  | . | . | .      | . |
| Vv06g0066    | .                  | .                  | .                  | . | . | .      | . |
| .            | .                  | .                  | .                  | . | . | .      | . |
| Vv06g0067    | Tc09_g034570       | .                  | Gorai.004G015800.1 | . | . | .      | . |
| .            | .                  | .                  | .                  | . | . | .      | . |
| Vv06g0068    | Tc09_g020300       | Gorai.013G244600.1 | .                  | . | . | .      | . |
| .            | Gorai.003G126300.1 | Vv08g1665          | .                  | . | . | .      | . |
| .            | Gorai.002G151800.1 | .                  | .                  | . | . | .      | . |
| .            | .                  | .                  | .                  | . | . | .      | . |

|                    |              |                    |   |   |
|--------------------|--------------|--------------------|---|---|
| Vv06g0069          | Tc09_g020290 | Gorai.013G244500.1 | . | . |
| .                  | .            | .                  | . | . |
| Vv06g0070          | Tc09_g020260 | Gorai.013G244400.1 | . | . |
| .                  | Vv08g1663    | Tc05_g024150       | . | . |
| .                  | .            | .                  | . | . |
| Vv06g0071          | .            | .                  | . | . |
| .                  | .            | .                  | . | . |
| Vv06g0072          | Tc09_g026250 | .                  | . | . |
| Gorai.003G123500.1 | .            | .                  | . | . |
| .                  | .            | .                  | . | . |
| Vv06g0073          | .            | .                  | . | . |
| .                  | .            | .                  | . | . |
| Vv06g0074          | Tc09_g026190 | .                  | . | . |
| Gorai.003G120900.1 | .            | .                  | . | . |
| .                  | .            | .                  | . | . |
| Vv06g0075          | .            | .                  | . | . |
| .                  | .            | .                  | . | . |
| Vv06g0076          | .            | .                  | . | . |
| .                  | .            | .                  | . | . |
| Vv06g0077          | .            | .                  | . | . |
| .                  | .            | .                  | . | . |
| Vv06g0078          | Tc09_g021690 | Gorai.013G244100.1 | . | . |
| .                  | Vv08g1650    | Tc05_g020300       | . | . |
| .                  | .            | .                  | . | . |
| Vv06g0079          | .            | .                  | . | . |
| .                  | .            | .                  | . | . |
| Vv06g0080          | .            | Gorai.004G016100.1 | . | . |
| .                  | .            | .                  | . | . |
| Vv06g0081          | .            | Gorai.004G016200.1 | . | . |
| .                  | .            | .                  | . | . |
| Vv06g0082          | .            | .                  | . | . |
| .                  | .            | .                  | . | . |
| Vv06g0083          | .            | Gorai.004G016300.1 | . | . |
| .                  | .            | .                  | . | . |
| Vv06g0084          | .            | .                  | . | . |
| .                  | .            | .                  | . | . |
| .                  | .            | .                  | . | . |

|                    |                    |                    |                    |                    |   |   |   |
|--------------------|--------------------|--------------------|--------------------|--------------------|---|---|---|
| Vv06g0085          | .                  | .                  | .                  | .                  | . | . | . |
| .                  | .                  | .                  | .                  | .                  | . | . | . |
| Vv06g0086          | .                  | .                  | .                  | .                  | . | . | . |
| .                  | .                  | .                  | .                  | .                  | . | . | . |
| Vv06g0087          | .                  | .                  | .                  | Gorai.004G016400.1 | . | . | . |
| .                  | .                  | .                  | .                  | .                  | . | . | . |
| Vv06g0088          | Tc09_g021650       | .                  | .                  | .                  | . | . | . |
| .                  | .                  | .                  | .                  | .                  | . | . | . |
| Vv06g0089          | .                  | .                  | .                  | .                  | . | . | . |
| .                  | .                  | .                  | .                  | .                  | . | . | . |
| Vv06g0090          | .                  | .                  | .                  | .                  | . | . | . |
| .                  | .                  | .                  | .                  | .                  | . | . | . |
| Vv06g0091          | Tc09_g021640       | .                  | .                  | .                  | . | . | . |
| .                  | .                  | .                  | .                  | .                  | . | . | . |
| Vv06g0092          | .                  | .                  | .                  | .                  | . | . | . |
| .                  | .                  | .                  | .                  | .                  | . | . | . |
| Vv06g0093          | Tc09_g021630       | Gorai.013G241700.1 | Gorai.             | .                  | . | . | . |
| 004G091700.1       | Gorai.004G016600.1 | .                  | Gorai.010G126100.1 | .                  | . | . | . |
| .                  | .                  | .                  | .                  | .                  | . | . | . |
| Vv06g0094          | Tc09_g021620       | .                  | Gorai.004G017100.1 | .                  | . | . | . |
| .                  | .                  | .                  | .                  | .                  | . | . | . |
| Vv06g0095          | .                  | .                  | .                  | .                  | . | . | . |
| .                  | .                  | .                  | .                  | .                  | . | . | . |
| Vv06g0096          | Tc09_g021610       | .                  | .                  | .                  | . | . | . |
| Gorai.010G126300.1 | .                  | .                  | .                  | .                  | . | . | . |
| .                  | Vv013rg0055        | .                  | .                  | .                  | . | . | . |
| .                  | .                  | .                  | .                  | .                  | . | . | . |
| Vv06g0097          | Tc09_g021600       | .                  | .                  | .                  | . | . | . |
| Gorai.010G126400.1 | .                  | .                  | .                  | .                  | . | . | . |
| .                  | .                  | .                  | .                  | .                  | . | . | . |
| Vv06g0098          | Tc09_g021590       | .                  | .                  | .                  | . | . | . |
| Gorai.010G126700.1 | .                  | .                  | .                  | .                  | . | . | . |
| .                  | .                  | .                  | .                  | .                  | . | . | . |
| Vv06g0099          | Tc09_g021560       | Gorai.013G247300.1 | .                  | .                  | . | . | . |
| .                  | .                  | .                  | .                  | .                  | . | . | . |
| Vv06g0100          | Tc09_g021520       | .                  | .                  | .                  | . | . | . |
| .                  | .                  | .                  | .                  | .                  | . | . | . |
| .                  | .                  | .                  | .                  | .                  | . | . | . |



|              |                    |                    |                    |              |        |   |   |
|--------------|--------------------|--------------------|--------------------|--------------|--------|---|---|
| Vv06g0117    | .                  | .                  | .                  | .            | .      | . | . |
| Vv08g1636    | .                  | .                  | .                  | .            | .      | . | . |
| .            | .                  | .                  | .                  | .            | .      | . | . |
| Vv06g0118    | .                  | .                  | .                  | .            | .      | . | . |
| .            | .                  | .                  | .                  | .            | .      | . | . |
| Vv06g0119    | .                  | .                  | .                  | .            | .      | . | . |
| .            | .                  | .                  | .                  | .            | .      | . | . |
| Vv06g0120    | Tc09_g021000       | .                  | Gorai.004G094000.1 | .            | .      | . | . |
| .            | Gorai.010G127100.1 | .                  | .                  | .            | .      | . | . |
| .            | .                  | Vv013rg0060        | .                  | .            | .      | . | . |
| .            | .                  | .                  | .                  | .            | .      | . | . |
| Vv06g0121    | .                  | .                  | .                  | .            | .      | . | . |
| .            | .                  | .                  | .                  | .            | .      | . | . |
| Vv06g0122    | .                  | .                  | Gorai.004G017500.1 | .            | .      | . | . |
| .            | .                  | .                  | .                  | .            | .      | . | . |
| Vv06g0123    | .                  | Gorai.013G248000.1 | .                  | .            | .      | . | . |
| .            | .                  | .                  | .                  | .            | .      | . | . |
| Vv06g0124    | .                  | .                  | Gorai.004G017600.1 | .            | .      | . | . |
| .            | .                  | .                  | .                  | .            | .      | . | . |
| Vv06g0125    | .                  | .                  | .                  | .            | .      | . | . |
| Vv08g1632    | .                  | .                  | .                  | .            | .      | . | . |
| .            | .                  | .                  | .                  | .            | .      | . | . |
| Vv06g0126    | .                  | Gorai.013G248100.1 | .                  | Gorai.       | .      | . | . |
| 004G017700.1 | .                  | Vv08g1631          | .                  | Tc05_g020650 | .      | . | . |
| .            | .                  | .                  | .                  | .            | .      | . | . |
| Vv06g0127    | .                  | .                  | .                  | .            | .      | . | . |
| Vv08g1629    | .                  | .                  | .                  | .            | .      | . | . |
| .            | .                  | .                  | .                  | .            | .      | . | . |
| Vv06g0128    | .                  | .                  | .                  | .            | .      | . | . |
| Vv08g1627    | .                  | .                  | .                  | .            | .      | . | . |
| .            | .                  | .                  | .                  | .            | .      | . | . |
| Vv06g0129    | .                  | .                  | .                  | .            | .      | . | . |
| Vv08g1625    | .                  | .                  | .                  | .            | Gorai. | . | . |
| 007G362600.1 | .                  | .                  | .                  | .            | .      | . | . |
| Vv06g0130    | .                  | .                  | .                  | .            | .      | . | . |
| .            | .                  | .                  | .                  | .            | .      | . | . |
| Vv06g0131    | .                  | .                  | .                  | .            | .      | . | . |
| .            | .                  | .                  | .                  | .            | .      | . | . |
| Vv06g0132    | .                  | .                  | .                  | .            | .      | . | . |
| Vv08g1624    | Tc05_g020670       | .                  | .                  | .            | .      | . | . |
| .            | .                  | .                  | .                  | .            | .      | . | . |



|                    |                    |   |   |                    |             |   |
|--------------------|--------------------|---|---|--------------------|-------------|---|
| Vv06g0133          | .                  | . | . | .                  | .           | . |
| Vv08g1623          | Tc05_g020680       | . | . | .                  | .           | . |
| Gorai.007G362500.1 | .                  | . | . | .                  | .           | . |
| .                  | .                  | . | . | .                  | .           | . |
| Vv06g0134          | .                  | . | . | .                  | .           | . |
| .                  | .                  | . | . | .                  | .           | . |
| .                  | .                  | . | . | .                  | .           | . |
| Vv06g0135          | .                  | . | . | .                  | .           | . |
| .                  | .                  | . | . | .                  | .           | . |
| .                  | .                  | . | . | .                  | .           | . |
| Vv06g0136          | .                  | . | . | .                  | .           | . |
| .                  | .                  | . | . | .                  | Vv013rg0061 | . |
| .                  | .                  | . | . | .                  | .           | . |
| Vv06g0137          | .                  | . | . | .                  | .           | . |
| .                  | .                  | . | . | .                  | .           | . |
| .                  | .                  | . | . | .                  | .           | . |
| Vv06g0138          | Tc09_g031010       | . | . | .                  | .           | . |
| Gorai.003G128500.1 | .                  | . | . | .                  | .           | . |
| .                  | .                  | . | . | .                  | .           | . |
| Vv06g0139          | .                  | . | . | .                  | .           | . |
| Vv08g1615          | .                  | . | . | .                  | .           | . |
| .                  | .                  | . | . | .                  | .           | . |
| Vv06g0140          | Tc09_g009300       | . | . | Gorai.001G007400.1 | .           | . |
| Gorai.004G018000.1 | .                  | . | . | .                  | .           | . |
| .                  | .                  | . | . | .                  | .           | . |
| .                  | .                  | . | . | .                  | .           | . |
| Vv06g0141          | .                  | . | . | .                  | .           | . |
| .                  | .                  | . | . | .                  | .           | . |
| .                  | .                  | . | . | .                  | .           | . |
| Vv06g0142          | Gorai.013G248400.1 | . | . | .                  | .           | . |
| .                  | Vv08g1610          | . | . | .                  | .           | . |
| .                  | .                  | . | . | .                  | .           | . |
| Vv06g0143          | .                  | . | . | .                  | .           | . |
| .                  | .                  | . | . | .                  | .           | . |
| .                  | .                  | . | . | .                  | .           | . |
| Vv06g0144          | .                  | . | . | .                  | .           | . |
| Vv08g1608          | .                  | . | . | Gorai.002G155600.1 | .           | . |
| .                  | .                  | . | . | .                  | .           | . |
| Vv06g0145          | .                  | . | . | .                  | .           | . |
| .                  | .                  | . | . | .                  | .           | . |
| .                  | .                  | . | . | .                  | .           | . |
| Vv06g0146          | Tc09_g024980       | . | . | .                  | .           | . |
| Gorai.006G124800.1 | .                  | . | . | .                  | .           | . |
| .                  | .                  | . | . | .                  | .           | . |
| Vv06g0147          | .                  | . | . | .                  | .           | . |
| .                  | .                  | . | . | .                  | .           | . |
| .                  | .                  | . | . | .                  | .           | . |
| Vv06g0148          | .                  | . | . | .                  | .           | . |
| .                  | .                  | . | . | .                  | .           | . |
| .                  | .                  | . | . | .                  | .           | . |

|                    |                    |                    |   |                    |                    |             |   |
|--------------------|--------------------|--------------------|---|--------------------|--------------------|-------------|---|
| Vv06g0149          | .                  | .                  | . | .                  | .                  | .           | . |
| .                  | .                  | .                  | . | .                  | .                  | .           | . |
| Vv06g0150          | .                  | .                  | . | .                  | .                  | .           | . |
| .                  | .                  | .                  | . | .                  | .                  | .           | . |
| Vv06g0151          | .                  | .                  | . | .                  | .                  | .           | . |
| .                  | .                  | .                  | . | .                  | .                  | .           | . |
| Vv06g0152          | Tc09_g020460       | .                  | . | .                  | .                  | .           | . |
| .                  | .                  | .                  | . | .                  | .                  | .           | . |
| Vv013rg0072        | .                  | .                  | . | .                  | .                  | .           | . |
| Vv06g0153          | .                  | .                  | . | .                  | .                  | .           | . |
| .                  | .                  | .                  | . | .                  | .                  | .           | . |
| Vv06g0154          | .                  | .                  | . | .                  | .                  | .           | . |
| Vv08g1585          | Tc05_g018780       | .                  | . | .                  | .                  | .           | . |
| .                  | .                  | .                  | . | .                  | .                  | .           | . |
| Vv06g0155          | .                  | .                  | . | .                  | .                  | .           | . |
| .                  | .                  | .                  | . | .                  | .                  | Vv013rg0074 | . |
| Vv06g0156          | .                  | .                  | . | .                  | .                  | .           | . |
| .                  | .                  | .                  | . | .                  | .                  | .           | . |
| Vv06g0157          | .                  | Gorai.013G248700.1 | . | .                  | .                  | .           | . |
| .                  | Vv08g1582          | Tc05_g018800       | . | .                  | .                  | .           | . |
| Gorai.002G156600.1 | Gorai.007G362300.1 | Gorai.007G362300.1 | . | .                  | Gorai.007G362300.1 | .           | . |
| .                  | .                  | .                  | . | .                  | .                  | .           | . |
| Vv06g0158          | Tc09_g009440       | .                  | . | .                  | .                  | .           | . |
| .                  | .                  | .                  | . | .                  | .                  | .           | . |
| Vv06g0159          | Tc09_g020380       | .                  | . | .                  | .                  | .           | . |
| .                  | .                  | .                  | . | .                  | .                  | .           | . |
| Vv06g0160          | .                  | .                  | . | Gorai.004G018200.1 | .                  | .           | . |
| .                  | .                  | .                  | . | .                  | .                  | .           | . |
| Vv06g0161          | .                  | .                  | . | .                  | .                  | .           | . |
| .                  | .                  | .                  | . | .                  | .                  | .           | . |
| Vv06g0162          | .                  | .                  | . | .                  | Gorai.009G070300.1 | .           | . |
| .                  | Vv08g1577          | Tc05_g018850       | . | .                  | .                  | .           | . |
| .                  | Vv013rg0079        | .                  | . | .                  | .                  | .           | . |
| .                  | .                  | .                  | . | .                  | .                  | .           | . |
| Vv06g0163          | Tc09_g025270       | .                  | . | .                  | .                  | .           | . |
| .                  | .                  | .                  | . | .                  | .                  | .           | . |
| Vv06g0164          | Tc09_g031150       | Gorai.013G249200.1 | . | .                  | .                  | .           | . |
| Gorai.004G018400.1 | .                  | .                  | . | Vv08g1576          | .                  | .           | . |
| Tc05_g018860       | .                  | .                  | . | .                  | .                  | .           | . |

|                    |                    |                    |                    |                    |                    |
|--------------------|--------------------|--------------------|--------------------|--------------------|--------------------|
| Vv06g0165          | .                  | .                  | .                  | .                  | Gorai.009G070400.1 |
| .                  | Vv08g1575          | Tc05_g018870       | .                  | .                  | .                  |
| .                  | .                  | .                  | .                  | .                  | .                  |
| Vv06g0166          | Tc09_g031280       | .                  | .                  | .                  | .                  |
| .                  | .                  | .                  | .                  | .                  | .                  |
| Vv06g0167          | .                  | Gorai.013G249300.1 | .                  | .                  | .                  |
| Gorai.009G070500.1 | .                  | .                  | .                  | .                  | .                  |
| .                  | .                  | .                  | .                  | .                  | .                  |
| Vv06g0168          | .                  | Gorai.013G249400.1 | .                  | Gorai.             | .                  |
| 004G018500.1       | Gorai.009G070600.1 | .                  | .                  | Vv08g1570          | .                  |
| Tc05_g018910       | .                  | .                  | .                  | Vv013rg0082        | .                  |
| .                  | .                  | .                  | .                  | .                  | .                  |
| Vv06g0169          | .                  | .                  | Gorai.004G018600.1 | .                  | .                  |
| .                  | .                  | .                  | .                  | .                  | .                  |
| Vv06g0170          | .                  | .                  | .                  | Gorai.009G070700.1 | .                  |
| .                  | .                  | .                  | .                  | .                  | .                  |
| Vv06g0171          | .                  | Gorai.013G249500.1 | .                  | .                  | .                  |
| .                  | .                  | .                  | .                  | .                  | .                  |
| Vv06g0172          | Tc09_g009720       | .                  | Gorai.001G005700.1 | .                  | .                  |
| .                  | .                  | .                  | .                  | .                  | .                  |
| Vv06g0173          | .                  | .                  | .                  | .                  | .                  |
| .                  | .                  | .                  | .                  | .                  | .                  |
| Vv06g0174          | .                  | .                  | .                  | .                  | .                  |
| .                  | .                  | .                  | .                  | .                  | .                  |
| Vv06g0175          | Tc09_g031220       | .                  | .                  | .                  | .                  |
| .                  | .                  | .                  | .                  | .                  | .                  |
| Vv06g0176          | Tc09_g031220       | .                  | .                  | .                  | .                  |
| .                  | .                  | .                  | .                  | .                  | .                  |
| Vv06g0177          | .                  | .                  | .                  | .                  | .                  |
| .                  | .                  | .                  | .                  | .                  | .                  |
| Vv06g0178          | .                  | .                  | .                  | .                  | .                  |
| .                  | .                  | .                  | .                  | .                  | .                  |
| Vv06g0179          | .                  | .                  | .                  | .                  | .                  |
| .                  | .                  | .                  | .                  | .                  | .                  |
| Vv06g0180          | Tc09_g031290       | .                  | .                  | .                  | .                  |

|             |              |   |   |   |                    |   |   |
|-------------|--------------|---|---|---|--------------------|---|---|
| .           | .            | . | . | . | .                  | . | . |
| .           | .            | . | . | . | .                  | . | . |
| Vv06g0181   | .            | . | . | . | .                  | . | . |
| .           | .            | . | . | . | .                  | . | . |
| .           | .            | . | . | . | .                  | . | . |
| Vv06g0182   | .            | . | . | . | .                  | . | . |
| Vv013rg0121 | .            | . | . | . | .                  | . | . |
| .           | .            | . | . | . | .                  | . | . |
| Vv06g0183   | .            | . | . | . | .                  | . | . |
| .           | .            | . | . | . | .                  | . | . |
| .           | .            | . | . | . | .                  | . | . |
| Vv06g0184   | .            | . | . | . | .                  | . | . |
| .           | .            | . | . | . | .                  | . | . |
| .           | .            | . | . | . | .                  | . | . |
| Vv06g0185   | .            | . | . | . | .                  | . | . |
| Vv013rg0122 | .            | . | . | . | .                  | . | . |
| .           | .            | . | . | . | .                  | . | . |
| Vv06g0186   | .            | . | . | . | .                  | . | . |
| .           | .            | . | . | . | .                  | . | . |
| .           | .            | . | . | . | .                  | . | . |
| Vv06g0187   | .            | . | . | . | .                  | . | . |
| Vv013rg0123 | .            | . | . | . | .                  | . | . |
| .           | .            | . | . | . | .                  | . | . |
| Vv06g0188   | .            | . | . | . | .                  | . | . |
| .           | .            | . | . | . | .                  | . | . |
| .           | .            | . | . | . | .                  | . | . |
| Vv06g0189   | .            | . | . | . | .                  | . | . |
| .           | .            | . | . | . | .                  | . | . |
| .           | .            | . | . | . | .                  | . | . |
| Vv06g0190   | Tc09_g025570 | . | . | . | .                  | . | . |
| Vv013rg0124 | .            | . | . | . | .                  | . | . |
| .           | .            | . | . | . | .                  | . | . |
| Vv06g0191   | .            | . | . | . | Gorai.009G071200.1 | . | . |
| .           | Vv13g1325    | . | . | . | .                  | . | . |
| .           | .            | . | . | . | .                  | . | . |
| Vv06g0192   | .            | . | . | . | .                  | . | . |
| Vv13g1324   | .            | . | . | . | .                  | . | . |
| .           | .            | . | . | . | .                  | . | . |
| Vv06g0193   | .            | . | . | . | .                  | . | . |
| .           | .            | . | . | . | .                  | . | . |
| .           | .            | . | . | . | .                  | . | . |
| Vv06g0194   | .            | . | . | . | .                  | . | . |
| Vv13g1323   | Tc10_g006390 | . | . | . | .                  | . | . |
| .           | .            | . | . | . | .                  | . | . |
| Vv06g0195   | .            | . | . | . | .                  | . | . |
| .           | .            | . | . | . | .                  | . | . |
| .           | .            | . | . | . | .                  | . | . |
| Vv06g0196   | .            | . | . | . | .                  | . | . |
| .           | .            | . | . | . | .                  | . | . |
| .           | .            | . | . | . | .                  | . | . |

|                    |                    |   |   |   |                    |   |   |
|--------------------|--------------------|---|---|---|--------------------|---|---|
| Vv06g0197          | .                  | . | . | . | .                  | . | . |
| .                  | .                  | . | . | . | .                  | . | . |
| Vv06g0198          | .                  | . | . | . | .                  | . | . |
| .                  | .                  | . | . | . | .                  | . | . |
| Vv06g0199          | .                  | . | . | . | .                  | . | . |
| .                  | .                  | . | . | . | .                  | . | . |
| Vv06g0200          | .                  | . | . | . | .                  | . | . |
| .                  | .                  | . | . | . | .                  | . | . |
| Vv06g0201          | .                  | . | . | . | .                  | . | . |
| .                  | .                  | . | . | . | .                  | . | . |
| Vv06g0202          | .                  | . | . | . | .                  | . | . |
| .                  | .                  | . | . | . | .                  | . | . |
| Vv06g0203          | Tc09_g031010       | . | . | . | .                  | . | . |
| Gorai.003G128500.1 | .                  | . | . | . | .                  | . | . |
| .                  | .                  | . | . | . | .                  | . | . |
| Vv06g0204          | Gorai.013G250000.1 | . | . | . | .                  | . | . |
| .                  | .                  | . | . | . | .                  | . | . |
| Vv06g0205          | .                  | . | . | . | .                  | . | . |
| .                  | .                  | . | . | . | .                  | . | . |
| Vv06g0206          | Gorai.013G250100.1 | . | . | . | .                  | . | . |
| Gorai.006G141200.1 | .                  | . | . | . | .                  | . | . |
| .                  | .                  | . | . | . | .                  | . | . |
| Vv06g0207          | .                  | . | . | . | Gorai.009G071300.1 | . | . |
| .                  | .                  | . | . | . | .                  | . | . |
| Vv06g0208          | .                  | . | . | . | .                  | . | . |
| .                  | .                  | . | . | . | .                  | . | . |
| Vv06g0209          | .                  | . | . | . | .                  | . | . |
| .                  | .                  | . | . | . | .                  | . | . |
| Vv06g0210          | .                  | . | . | . | .                  | . | . |
| .                  | .                  | . | . | . | .                  | . | . |
| Vv06g0211          | Gorai.013G250300.1 | . | . | . | .                  | . | . |
| Gorai.009G071400.1 | .                  | . | . | . | .                  | . | . |
| .                  | .                  | . | . | . | .                  | . | . |
| Vv06g0212          | .                  | . | . | . | .                  | . | . |
| .                  | .                  | . | . | . | .                  | . | . |
| .                  | .                  | . | . | . | .                  | . | . |

|                    |              |                    |                    |        |
|--------------------|--------------|--------------------|--------------------|--------|
| Vv06g0213          | Tc09_g030790 | .                  | Gorai.001G113800.1 | .      |
| .                  | .            | .                  | .                  | .      |
| Vv06g0214          | .            | .                  | .                  | .      |
| .                  | .            | .                  | .                  | .      |
| Vv06g0215          | .            | .                  | .                  | .      |
| .                  | .            | .                  | .                  | .      |
| Vv06g0216          | .            | .                  | .                  | .      |
| .                  | .            | .                  | .                  | .      |
| Vv06g0217          | .            | .                  | .                  | .      |
| .                  | .            | .                  | .                  | .      |
| Vv06g0218          | Tc09_g030470 | .                  | .                  | Gorai. |
| 009G071800.1       | .            | .                  | .                  | .      |
| .                  | .            | .                  | .                  | .      |
| Vv06g0219          | .            | .                  | .                  | .      |
| Vv13g1306          | .            | .                  | .                  | .      |
| .                  | .            | .                  | .                  | .      |
| Vv06g0220          | .            | .                  | .                  | Gorai. |
| 006G129600.1       | .            | .                  | .                  | .      |
| .                  | .            | .                  | .                  | .      |
| Vv06g0221          | .            | Gorai.013G250500.1 | .                  | .      |
| .                  | .            | .                  | .                  | .      |
| .                  | .            | .                  | .                  | .      |
| Vv06g0222          | .            | .                  | Gorai.001G140400.1 | .      |
| Gorai.006G129500.1 | .            | .                  | .                  | .      |
| .                  | .            | .                  | .                  | .      |
| .                  | .            | .                  | .                  | .      |
| Vv06g0223          | .            | Gorai.013G250600.1 | .                  | .      |
| .                  | .            | .                  | .                  | .      |
| .                  | .            | .                  | .                  | .      |
| Vv06g0224          | .            | .                  | Gorai.004G035800.1 | .      |
| Gorai.009G071900.1 | .            | Gorai.006G140200.1 | .                  | .      |
| .                  | .            | .                  | .                  | .      |
| .                  | .            | .                  | .                  | .      |
| Vv06g0225          | Tc09_g030110 | .                  | .                  | .      |
| .                  | .            | .                  | .                  | .      |
| .                  | .            | .                  | .                  | .      |
| Vv06g0226          | .            | .                  | .                  | .      |
| .                  | .            | .                  | .                  | .      |
| .                  | .            | .                  | .                  | .      |
| Vv06g0227          | .            | .                  | Gorai.001G140300.1 | .      |
| .                  | .            | .                  | .                  | .      |
| .                  | .            | .                  | .                  | .      |
| Vv06g0228          | Tc09_g025900 | .                  | .                  | .      |
| .                  | .            | .                  | .                  | .      |
| .                  | .            | .                  | .                  | .      |

|                    |                    |                    |   |                    |   |
|--------------------|--------------------|--------------------|---|--------------------|---|
| Vv06g0229          | .                  | .                  | . | Gorai.004G036200.1 | . |
| .                  | Vv13g1290          | .                  | . | .                  | . |
| .                  | .                  | .                  | . | .                  | . |
| Vv06g0230          | .                  | .                  | . | Gorai.001G140000.1 | . |
| Gorai.006G139300.1 | .                  | .                  | . | .                  | . |
| .                  | .                  | .                  | . | .                  | . |
| .                  | .                  | .                  | . | .                  | . |
| Vv06g0231          | .                  | .                  | . | Gorai.009G072300.1 | . |
| .                  | .                  | .                  | . | .                  | . |
| .                  | .                  | .                  | . | .                  | . |
| Vv06g0232          | .                  | .                  | . | .                  | . |
| .                  | .                  | .                  | . | .                  | . |
| .                  | .                  | .                  | . | .                  | . |
| Vv06g0233          | .                  | .                  | . | .                  | . |
| .                  | .                  | .                  | . | .                  | . |
| .                  | .                  | .                  | . | .                  | . |
| Vv06g0234          | .                  | .                  | . | .                  | . |
| .                  | .                  | .                  | . | .                  | . |
| .                  | .                  | .                  | . | .                  | . |
| Vv06g0235          | .                  | .                  | . | Gorai.004G018900.1 | . |
| .                  | .                  | .                  | . | .                  | . |
| .                  | .                  | .                  | . | .                  | . |
| Vv06g0236          | .                  | Gorai.013G250800.1 | . | Gorai.             | . |
| 004G037000.1       | .                  | Gorai.006G138700.1 | . | Vv13g1280          | . |
| .                  | .                  | .                  | . | .                  | . |
| .                  | .                  | .                  | . | .                  | . |
| Vv06g0237          | .                  | .                  | . | Gorai.004G019000.1 | . |
| Gorai.009G072400.1 | .                  | .                  | . | .                  | . |
| .                  | .                  | .                  | . | .                  | . |
| .                  | .                  | .                  | . | .                  | . |
| Vv06g0238          | .                  | .                  | . | .                  | . |
| .                  | .                  | .                  | . | .                  | . |
| .                  | .                  | .                  | . | .                  | . |
| Vv06g0239          | .                  | .                  | . | .                  | . |
| .                  | .                  | .                  | . | .                  | . |
| .                  | .                  | .                  | . | .                  | . |
| Vv06g0240          | Tc09_g003230       | .                  | . | Gorai.             | . |
| 009G072500.1       | .                  | .                  | . | .                  | . |
| .                  | .                  | .                  | . | .                  | . |
| Vv06g0241          | .                  | .                  | . | Gorai.001G139700.1 | . |
| .                  | .                  | .                  | . | .                  | . |
| .                  | .                  | .                  | . | .                  | . |
| Vv06g0242          | .                  | .                  | . | .                  | . |
| .                  | .                  | .                  | . | .                  | . |
| .                  | .                  | .                  | . | .                  | . |
| Vv06g0243          | Tc09_g034570       | .                  | . | Gorai.001G139600.1 | . |
| Gorai.004G037100.1 | Gorai.009G072600.1 | .                  | . | .                  | . |
| .                  | .                  | .                  | . | .                  | . |
| .                  | .                  | .                  | . | .                  | . |
| Vv06g0244          | Tc09_g030080       | .                  | . | .                  | . |

|           |                    |   |   |                    |
|-----------|--------------------|---|---|--------------------|
| Vv06g0245 | Tc09_g034210       | . | . | Gorai.004G019200.1 |
|           | Gorai.009G072700.1 | . | . | .                  |
| Vv06g0246 | .                  | . | . | .                  |
| Vv06g0247 | .                  | . | . | .                  |
| Vv06g0248 | .                  | . | . | .                  |
| Vv06g0249 | .                  | . | . | .                  |
| Vv06g0250 | .                  | . | . | .                  |
| Vv06g0251 | .                  | . | . | Gorai.             |
|           | 006G129200.1       | . | . | .                  |
| Vv06g0252 | .                  | . | . | .                  |
| Vv06g0253 | Tc09_g026260       | . | . | Gorai.001G139100.1 |
|           | Gorai.004G019500.1 | . | . | .                  |
| Vv06g0254 | .                  | . | . | Gorai.004G019600.1 |
| Vv06g0255 | .                  | . | . | .                  |
| Vv06g0256 | Tc09_g002910       | . | . | Gorai.             |
|           | 009G072900.1       | . | . | .                  |
| Vv06g0257 | .                  | . | . | Gorai.004G019700.1 |
| Vv06g0258 | .                  | . | . | .                  |
| Vv06g0259 | .                  | . | . | Gorai.009G073000.1 |
| Vv06g0260 | Tc09_g029840       | . | . | .                  |



|                    |              |                    |                    |                    |                    |        |   |
|--------------------|--------------|--------------------|--------------------|--------------------|--------------------|--------|---|
| .                  | .            | .                  | .                  | .                  | .                  | .      | . |
| .                  | .            | .                  | .                  | .                  | .                  | .      | . |
| Vv06g0261          | .            | .                  | .                  | .                  | .                  | .      | . |
| .                  | .            | .                  | .                  | .                  | .                  | .      | . |
| Vv06g0262          | Tc09_g033950 | .                  | .                  | .                  | .                  | .      | . |
| .                  | .            | .                  | .                  | .                  | .                  | .      | . |
| Vv06g0263          | .            | .                  | .                  | .                  | .                  | Gorai. | . |
| 006G129000.1       | .            | .                  | .                  | .                  | .                  | .      | . |
| .                  | .            | .                  | .                  | .                  | .                  | .      | . |
| Vv06g0264          | .            | .                  | .                  | Gorai.004G037400.1 | .                  | .      | . |
| Gorai.006G128800.1 | .            | Vv13g1265          | .                  | .                  | .                  | .      | . |
| .                  | .            | .                  | .                  | .                  | .                  | .      | . |
| Vv06g0265          | .            | .                  | .                  | .                  | .                  | .      | . |
| .                  | .            | .                  | .                  | .                  | .                  | .      | . |
| Vv06g0266          | .            | .                  | Gorai.001G138300.1 | .                  | Gorai.             | .      | . |
| 004G037500.1       | .            | Gorai.006G138100.1 | .                  | Vv13g1262          | .                  | .      | . |
| .                  | .            | .                  | .                  | .                  | .                  | .      | . |
| Vv06g0267          | .            | .                  | .                  | .                  | .                  | .      | . |
| .                  | .            | .                  | .                  | .                  | .                  | .      | . |
| Vv06g0268          | .            | .                  | .                  | .                  | .                  | Gorai. | . |
| 006G128700.1       | .            | .                  | .                  | .                  | .                  | .      | . |
| .                  | .            | .                  | .                  | .                  | .                  | .      | . |
| Vv06g0269          | .            | .                  | .                  | .                  | Gorai.009G073300.1 | .      | . |
| Gorai.006G128600.1 | .            | Vv13g1261          | .                  | .                  | .                  | .      | . |
| .                  | .            | .                  | .                  | .                  | .                  | .      | . |
| Vv06g0270          | .            | .                  | .                  | .                  | .                  | Gorai. | . |
| 006G128500.1       | .            | .                  | .                  | .                  | .                  | .      | . |
| .                  | .            | .                  | .                  | .                  | .                  | .      | . |
| Vv06g0271          | .            | .                  | .                  | .                  | .                  | .      | . |
| .                  | .            | .                  | .                  | .                  | .                  | .      | . |
| Vv06g0272          | .            | Gorai.013G251200.1 | .                  | .                  | .                  | .      | . |
| .                  | Vv13g1257    | .                  | .                  | .                  | .                  | .      | . |
| .                  | .            | .                  | .                  | .                  | .                  | .      | . |
| Vv06g0273          | .            | .                  | .                  | Gorai.004G019800.1 | .                  | .      | . |
| .                  | .            | .                  | .                  | .                  | .                  | .      | . |
| Vv06g0274          | .            | .                  | .                  | .                  | .                  | .      | . |
| .                  | .            | .                  | .                  | .                  | .                  | .      | . |
| Vv06g0275          | .            | .                  | .                  | .                  | .                  | .      | . |
| .                  | .            | .                  | .                  | .                  | .                  | .      | . |
| .                  | .            | .                  | .                  | .                  | .                  | .      | . |

|                    |   |                    |                    |                    |                    |   |   |
|--------------------|---|--------------------|--------------------|--------------------|--------------------|---|---|
| Vv06g0276          | . | .                  | .                  | .                  | .                  | . | . |
| .                  | . | .                  | .                  | .                  | .                  | . | . |
| Vv06g0277          | . | Gorai.013G251300.1 | .                  | Gorai.001G137900.1 | .                  | . | . |
| .                  | . | .                  | .                  | .                  | .                  | . | . |
| .                  | . | .                  | .                  | .                  | .                  | . | . |
| Vv06g0278          | . | .                  | .                  | .                  | .                  | . | . |
| .                  | . | .                  | .                  | .                  | .                  | . | . |
| Vv06g0279          | . | .                  | .                  | .                  | .                  | . | . |
| .                  | . | .                  | .                  | .                  | .                  | . | . |
| Vv06g0280          | . | .                  | .                  | .                  | .                  | . | . |
| .                  | . | .                  | .                  | .                  | .                  | . | . |
| Vv06g0281          | . | .                  | .                  | .                  | .                  | . | . |
| .                  | . | .                  | .                  | .                  | .                  | . | . |
| Vv06g0282          | . | .                  | .                  | .                  | .                  | . | . |
| .                  | . | .                  | .                  | .                  | .                  | . | . |
| Vv06g0283          | . | Gorai.013G251400.1 | .                  | .                  | .                  | . | . |
| Gorai.006G127900.1 | . | .                  | .                  | .                  | .                  | . | . |
| .                  | . | .                  | .                  | .                  | .                  | . | . |
| .                  | . | .                  | .                  | .                  | .                  | . | . |
| Vv06g0284          | . | .                  | .                  | .                  | .                  | . | . |
| .                  | . | .                  | .                  | .                  | .                  | . | . |
| Vv06g0285          | . | .                  | Gorai.001G137800.1 | .                  | .                  | . | . |
| Gorai.009G073600.1 | . | .                  | .                  | .                  | .                  | . | . |
| .                  | . | .                  | .                  | .                  | .                  | . | . |
| Vv06g0286          | . | .                  | Gorai.001G137700.1 | .                  | .                  | . | . |
| .                  | . | .                  | .                  | .                  | .                  | . | . |
| .                  | . | .                  | .                  | .                  | .                  | . | . |
| Vv06g0287          | . | .                  | .                  | Gorai.004G022400.1 | .                  | . | . |
| Gorai.006G127600.1 | . | .                  | .                  | .                  | .                  | . | . |
| .                  | . | .                  | .                  | .                  | .                  | . | . |
| .                  | . | .                  | .                  | .                  | .                  | . | . |
| Vv06g0288          | . | Gorai.013G251600.1 | .                  | Gorai.001G137600.1 | .                  | . | . |
| .                  | . | Gorai.006G127400.1 | .                  | .                  | .                  | . | . |
| .                  | . | .                  | .                  | .                  | .                  | . | . |
| .                  | . | .                  | .                  | .                  | .                  | . | . |
| Vv06g0289          | . | .                  | .                  | .                  | Gorai.009G073700.1 | . | . |
| Gorai.006G127100.1 | . | .                  | .                  | .                  | .                  | . | . |
| .                  | . | .                  | .                  | .                  | .                  | . | . |
| .                  | . | .                  | .                  | .                  | .                  | . | . |
| Vv06g0290          | . | .                  | .                  | .                  | Gorai.             | . | . |
| 006G127000.1       | . | .                  | .                  | .                  | .                  | . | . |

|                    |                    |                    |                    |   |   |
|--------------------|--------------------|--------------------|--------------------|---|---|
| Vv06g0291          | Tc09_g033710       | .                  | .                  | . | . |
| Gorai.003G143800.1 | .                  | .                  | .                  | . | . |
| Vv06g0292          | Tc09_g033700       | .                  | .                  | . | . |
| Vv08g0753          | .                  | Gorai.006G165300.1 | .                  | . | . |
| .                  | .                  | .                  | .                  | . | . |
| Vv06g0293          | Tc09_g033690       | Gorai.013G268100.1 | Gorai.             | . | . |
| 001G134600.1       | .                  | Gorai.006G165400.1 | .                  | . | . |
| .                  | .                  | .                  | Vv13g0704          | . | . |
| Vv06g0294          | Tc09_g033680       | .                  | .                  | . | . |
| .                  | .                  | .                  | .                  | . | . |
| Vv06g0295          | .                  | .                  | Gorai.009G109800.1 | . | . |
| .                  | .                  | .                  | .                  | . | . |
| Vv13g0701          | .                  | Gorai.011G238300.1 | .                  | . | . |
| Gorai.009G312500.1 | .                  | .                  | .                  | . | . |
| Vv06g0296          | Gorai.013G267700.1 | .                  | .                  | . | . |
| Gorai.009G109700.1 | .                  | .                  | .                  | . | . |
| .                  | .                  | .                  | .                  | . | . |
| Vv06g0297          | .                  | .                  | .                  | . | . |
| Vv08g0758          | Tc05_g006620       | Gorai.002G247800.1 | .                  | . | . |
| .                  | Gorai.007G373500.1 | .                  | .                  | . | . |
| .                  | .                  | .                  | .                  | . | . |
| Vv06g0298          | .                  | .                  | .                  | . | . |
| .                  | .                  | .                  | .                  | . | . |
| Vv06g0299          | .                  | .                  | Gorai.009G109500.1 | . | . |
| .                  | .                  | .                  | .                  | . | . |
| Vv06g0300          | .                  | .                  | .                  | . | . |
| .                  | .                  | .                  | .                  | . | . |
| Vv06g0301          | .                  | .                  | .                  | . | . |
| .                  | .                  | .                  | .                  | . | . |
| Vv06g0302          | .                  | .                  | .                  | . | . |
| .                  | .                  | .                  | .                  | . | . |
| Vv06g0303          | .                  | .                  | .                  | . | . |
| .                  | .                  | .                  | .                  | . | . |
| Vv06g0304          | .                  | .                  | Gorai.009G109400.1 | . | . |
| .                  | .                  | .                  | .                  | . | . |
| Vv06g0305          | .                  | .                  | .                  | . | . |
| .                  | .                  | .                  | .                  | . | . |

|                    |                    |                    |                    |   |   |                    |
|--------------------|--------------------|--------------------|--------------------|---|---|--------------------|
| Vv06g0306          | .                  | .                  | .                  | . | . | Gorai.009G109300.1 |
|                    | Gorai.006G115600.1 | .                  | .                  | . | . | .                  |
| Vv06g0307          | .                  | .                  | .                  | . | . | .                  |
| Vv06g0308          | .                  | Gorai.013G267400.1 | .                  | . | . | .                  |
| Gorai.009G109100.1 | Gorai.006G135100.1 | .                  | .                  | . | . | .                  |
| Vv06g0309          | .                  | .                  | .                  | . | . | .                  |
| Vv06g0310          | .                  | Gorai.013G252300.1 | .                  | . | . | .                  |
|                    | Gorai.006G132200.1 | .                  | .                  | . | . | .                  |
| Vv06g0311          | .                  | .                  | .                  | . | . | Gorai.009G108800.1 |
| Vv06g0312          | .                  | .                  | .                  | . | . | Gorai.             |
| 006G166000.1       | Vv08g0763          | Tc05_g006550       | Gorai.006G166000.1 | . | . | .                  |
|                    | Gorai.002G248000.1 | .                  | Gorai.009G416300.1 | . | . | .                  |
| Gorai.007G373600.1 | Vv13g0688          | Tc10_g005730       | .                  | . | . | .                  |
| Gorai.011G238400.1 | .                  | .                  | .                  | . | . | .                  |
| Vv06g0313          | Tc09_g033630       | .                  | .                  | . | . | .                  |
| Vv06g0314          | Tc09_g033620       | .                  | .                  | . | . | Gorai.             |
| 009G108700.1       | Gorai.003G143400.1 | .                  | .                  | . | . | .                  |
| Vv06g0315          | Tc09_g033610       | .                  | .                  | . | . | Gorai.             |
| 009G108600.1       | .                  | .                  | .                  | . | . | .                  |
| Vv06g0316          | Tc09_g033600       | .                  | .                  | . | . | Gorai.             |
| 009G108500.1       | Gorai.003G143300.1 | Vv08g0771          | .                  | . | . | .                  |
| Tc05_g006510       | Gorai.002G248200.1 | .                  | .                  | . | . | .                  |
| Vv06g0317          | Tc09_g033590       | .                  | .                  | . | . | Gorai.             |
| 009G108400.1       | Gorai.003G143200.1 | Vv08g0773          | .                  | . | . | .                  |
| Tc05_g006490       | Gorai.002G248300.1 | .                  | .                  | . | . | Gorai.             |
| 009G417300.1       | .                  | .                  | .                  | . | . | .                  |
| Vv06g0318          | .                  | .                  | .                  | . | . | .                  |
| Vv06g0319          | Tc09_g033580       | .                  | .                  | . | . | Gorai.             |

|                    |                    |                    |              |        |   |
|--------------------|--------------------|--------------------|--------------|--------|---|
| 009G108300.1       | Gorai.003G143100.1 | .                  | .            | .      | . |
| .                  | .                  | .                  | .            | .      | . |
| .                  | .                  | .                  | .            | .      | . |
| Vv06g0320          | Tc09_g033560       | Gorai.013G267300.1 | .            | .      | . |
|                    | Gorai.009G108200.1 | Gorai.003G143000.1 | .            | .      | . |
| .                  | .                  | .                  | .            | .      | . |
| .                  | .                  | .                  | .            | .      | . |
| Vv06g0321          | Tc09_g033550       | .                  | .            | Gorai. | . |
| 009G108100.1       | Gorai.003G142900.1 | .                  | .            | .      | . |
| .                  | .                  | .                  | .            | .      | . |
| .                  | .                  | .                  | .            | .      | . |
| Vv06g0322          | .                  | .                  | .            | .      | . |
| .                  | .                  | .                  | .            | .      | . |
| .                  | .                  | .                  | .            | .      | . |
| Vv06g0323          | Tc09_g033540       | .                  | .            | Gorai. | . |
| 009G108000.1       | Gorai.003G142800.1 | .                  | .            | .      | . |
| .                  | .                  | Vv13g0682          | Tc10_g005630 | .      | . |
| .                  | Gorai.009G313600.1 | Gorai.010G205600.1 | .            | .      | . |
| Vv06g0324          | Tc09_g033530       | .                  | .            | .      | . |
| Gorai.003G142700.1 | .                  | .                  | .            | .      | . |
| .                  | .                  | .                  | .            | .      | . |
| Vv06g0325          | Tc09_g033520       | Gorai.013G267200.1 | .            | .      | . |
|                    | Gorai.009G107900.1 | Gorai.003G142600.1 | .            | .      | . |
| .                  | .                  | .                  | Vv13g0681    | .      | . |
| Tc10_g005620       | Gorai.011G238800.1 | Gorai.009G313700.1 | .            | .      | . |
| .                  | .                  | .                  | .            | .      | . |
| Vv06g0326          | Tc09_g033510       | Gorai.013G267100.1 | .            | .      | . |
|                    | Gorai.009G107800.1 | Gorai.006G120400.1 | Vv08g0776    | .      | . |
|                    | Tc05_g006450       | Gorai.006G166400.1 | .            | .      | . |
| .                  | Vv13g0680          | Tc10_g005610       | Gorai.       | .      | . |
| 011G238900.1       | .                  | Gorai.012G004800.1 | .            | .      | . |
| Vv06g0327          | .                  | .                  | .            | .      | . |
| .                  | .                  | .                  | .            | .      | . |
| .                  | .                  | .                  | .            | .      | . |
| Vv06g0328          | Tc09_g033490       | Gorai.013G267000.1 | .            | .      | . |
|                    | Gorai.009G107700.1 | Gorai.003G142400.1 | .            | .      | . |
| .                  | .                  | .                  | .            | .      | . |
| .                  | .                  | .                  | .            | .      | . |
| Vv06g0329          | .                  | .                  | .            | .      | . |
| .                  | .                  | .                  | .            | .      | . |
| .                  | .                  | .                  | .            | .      | . |
| Vv06g0330          | Tc09_g033480       | .                  | .            | Gorai. | . |
| 009G107600.1       | Gorai.003G142300.1 | Vv08g0777          | .            | .      | . |
| Tc05_g006440       | .                  | Gorai.009G417500.1 | .            | .      | . |
|                    | Vv13g0676          | Gorai.013G027400.1 | .            | .      | . |
| .                  | .                  | .                  | .            | .      | . |
| Vv06g0331          | Tc09_g033470       | Gorai.013G266900.1 | .            | .      | . |
|                    | Gorai.009G107500.1 | Gorai.003G142200.1 | .            | .      | . |
| .                  | .                  | .                  | Vv13g0675    | .      | . |
| .                  | .                  | .                  | .            | .      | . |

|                    |                    |                    |              |                    |
|--------------------|--------------------|--------------------|--------------|--------------------|
| Vv06g0332          | Tc09_g033450       | Gorai.013G263900.1 | .            | .                  |
| .                  | Gorai.003G142000.1 | .                  | .            | .                  |
| .                  | .                  | .                  | .            | .                  |
| .                  | .                  | .                  | .            | .                  |
| Vv06g0333          | Tc09_g033440       | .                  | .            | Gorai.             |
| 009G107400.1       | Gorai.003G141900.1 | .                  | .            | .                  |
| .                  | .                  | .                  | .            | .                  |
| .                  | .                  | .                  | .            | .                  |
| Vv06g0334          | .                  | .                  | .            | .                  |
| .                  | .                  | .                  | .            | .                  |
| .                  | .                  | .                  | .            | .                  |
| Vv06g0335          | Tc09_g033430       | .                  | .            | .                  |
| Gorai.006G166600.1 | Vv08g0780          | Tc05_g006420       | Gorai.       | .                  |
| 006G166600.1       | .                  | Gorai.009G417700.1 | .            | .                  |
| .                  | .                  | .                  | .            | .                  |
| Vv06g0336          | .                  | .                  | .            | .                  |
| .                  | .                  | .                  | .            | .                  |
| .                  | .                  | .                  | .            | .                  |
| Vv06g0337          | Tc09_g033410       | .                  | .            | Gorai.             |
| 009G107200.1       | Gorai.006G166800.1 | Vv08g0782          | .            | .                  |
| Tc05_g006380       | Gorai.006G166800.1 | Gorai.002G248400.1 | .            | .                  |
| Gorai.009G418100.1 | .                  | .                  | .            | .                  |
| .                  | .                  | .                  | .            | .                  |
| Vv06g0338          | .                  | .                  | .            | .                  |
| .                  | .                  | .                  | .            | .                  |
| .                  | .                  | .                  | .            | .                  |
| Vv06g0339          | Tc09_g033380       | .                  | .            | Gorai.             |
| 009G106900.1       | .                  | .                  | .            | .                  |
| .                  | .                  | .                  | .            | .                  |
| Vv06g0340          | Tc09_g033360       | .                  | .            | Gorai.             |
| 009G106600.1       | Gorai.003G141300.1 | .                  | .            | .                  |
| .                  | .                  | Vv13g0668          | Tc10_g005420 | .                  |
| .                  | .                  | .                  | .            | .                  |
| Vv06g0341          | .                  | .                  | .            | .                  |
| .                  | .                  | .                  | .            | .                  |
| .                  | .                  | .                  | .            | .                  |
| Vv06g0342          | Tc09_g033330       | .                  | .            | .                  |
| .                  | .                  | .                  | .            | .                  |
| .                  | .                  | .                  | .            | .                  |
| Vv06g0343          | .                  | .                  | .            | Gorai.             |
| 006G113600.1       | .                  | .                  | .            | .                  |
| .                  | .                  | .                  | .            | .                  |
| Vv06g0344          | Tc09_g033320       | .                  | .            | .                  |
| .                  | .                  | .                  | .            | .                  |
| .                  | .                  | .                  | .            | .                  |
| Vv06g0345          | .                  | .                  | .            | Gorai.009G106300.1 |
| Gorai.003G141100.1 | .                  | .                  | .            | .                  |
| .                  | .                  | .                  | .            | .                  |
| .                  | .                  | .                  | .            | .                  |
| Vv06g0346          | .                  | .                  | .            | .                  |

|                    |                    |              |   |   |   |                    |   |
|--------------------|--------------------|--------------|---|---|---|--------------------|---|
| .                  | .                  | .            | . | . | . | .                  | . |
| .                  | .                  | .            | . | . | . | .                  | . |
| Vv06g0347          | .                  | .            | . | . | . | Gorai.             | . |
| 003G141000.1       | .                  | .            | . | . | . | .                  | . |
| .                  | .                  | .            | . | . | . | .                  | . |
| Vv06g0348          | .                  | .            | . | . | . | .                  | . |
| .                  | .                  | .            | . | . | . | .                  | . |
| .                  | .                  | .            | . | . | . | .                  | . |
| Vv06g0349          | .                  | .            | . | . | . | .                  | . |
| .                  | .                  | .            | . | . | . | .                  | . |
| .                  | .                  | .            | . | . | . | .                  | . |
| Vv06g0350          | .                  | .            | . | . | . | Gorai.009G103400.1 | . |
| .                  | .                  | .            | . | . | . | .                  | . |
| Vv13g0664          | Tc10_g005370       | .            | . | . | . | Gorai.011G240100.1 | . |
| Gorai.009G314200.1 | .                  | .            | . | . | . | .                  | . |
| Vv06g0351          | .                  | .            | . | . | . | Gorai.             | . |
| 006G167300.1       | Vv08g0787          | Tc05_g006250 | . | . | . | Gorai.006G167300.1 | . |
| .                  | Gorai.009G418300.1 | .            | . | . | . | Gorai.007G374000.1 | . |
| .                  | .                  | .            | . | . | . | .                  | . |
| Vv06g0352          | .                  | .            | . | . | . | .                  | . |
| .                  | .                  | .            | . | . | . | .                  | . |
| .                  | .                  | .            | . | . | . | .                  | . |
| Vv06g0353          | .                  | .            | . | . | . | Gorai.             | . |
| 003G138000.1       | .                  | .            | . | . | . | .                  | . |
| .                  | .                  | .            | . | . | . | .                  | . |
| Vv06g0354          | Tc09_g025520       | .            | . | . | . | Gorai.001G132200.1 | . |
| .                  | Gorai.006G121600.1 | .            | . | . | . | .                  | . |
| .                  | .                  | .            | . | . | . | .                  | . |
| .                  | .                  | .            | . | . | . | .                  | . |
| Vv06g0355          | .                  | .            | . | . | . | .                  | . |
| .                  | .                  | .            | . | . | . | .                  | . |
| .                  | .                  | .            | . | . | . | .                  | . |
| Vv06g0356          | Tc09_g025610       | .            | . | . | . | Gorai.             | . |
| 009G078300.1       | .                  | .            | . | . | . | .                  | . |
| .                  | .                  | .            | . | . | . | .                  | . |
| Vv06g0357          | Tc09_g025630       | .            | . | . | . | Gorai.001G131700.1 | . |
| .                  | Gorai.006G119700.1 | .            | . | . | . | .                  | . |
| .                  | .                  | .            | . | . | . | .                  | . |
| .                  | .                  | .            | . | . | . | .                  | . |
| Vv06g0358          | Tc09_g025640       | .            | . | . | . | Gorai.             | . |
| 009G078400.1       | .                  | .            | . | . | . | .                  | . |
| .                  | .                  | .            | . | . | . | .                  | . |
| Vv06g0359          | Tc09_g025660       | .            | . | . | . | Gorai.001G131300.1 | . |
| .                  | .                  | .            | . | . | . | .                  | . |
| .                  | .                  | .            | . | . | . | .                  | . |
| Vv06g0360          | .                  | .            | . | . | . | Gorai.             | . |
| 006G167400.1       | .                  | .            | . | . | . | .                  | . |
| .                  | .                  | .            | . | . | . | .                  | . |
| Vv06g0361          | .                  | .            | . | . | . | .                  | . |
| .                  | .                  | .            | . | . | . | .                  | . |

|                    |                    |                    |                    |           |
|--------------------|--------------------|--------------------|--------------------|-----------|
| Vv06g0362          | Tc09_g025680       | .                  | Gorai.001G131000.1 | .         |
| .                  | Gorai.006G167600.1 | .                  | Vv08g0796          | .         |
| Tc05_g006190       | Gorai.006G167600.1 | .                  | .                  | Gorai.    |
| 009G418600.1       | .                  | .                  | .                  | .         |
| Vv06g0363          | Tc09_g025700       | .                  | .                  | .         |
| Gorai.006G127700.1 | .                  | .                  | .                  | .         |
| Vv06g0364          | Tc09_g025710       | .                  | .                  | .         |
| Gorai.006G120200.1 | Vv08g0799          | .                  | Tc05_g006170       | .         |
| Gorai.002G248800.1 | .                  | Gorai.009G418800.1 | .                  | .         |
| Vv06g0365          | .                  | .                  | .                  | .         |
| .                  | .                  | .                  | .                  | Vv13g0647 |
| Vv06g0366          | Tc09_g025760       | .                  | .                  | Gorai.    |
| 009G078600.1       | Vv08g0804          | .                  | Tc05_g006150       | .         |
| .                  | .                  | Vv13g0646          | Tc10_g005220       | .         |
| Gorai.011G240700.1 | .                  | Gorai.010G205100.1 | .                  | .         |
| Gorai.012G004100.1 | .                  | .                  | .                  | .         |
| Vv06g0367          | .                  | Gorai.001G130800.1 | .                  | .         |
| Gorai.009G078700.1 | .                  | Vv08g0805          | Tc05_g006140       | .         |
| .                  | .                  | Vv13g0644          | .                  | .         |
| .                  | Gorai.010G205000.1 | .                  | .                  | .         |
| Vv06g0368          | Tc09_g033510       | .                  | .                  | .         |
| .                  | .                  | .                  | .                  | .         |
| Vv06g0369          | .                  | .                  | .                  | Gorai.    |
| 006G120500.1       | .                  | .                  | .                  | .         |
| Vv06g0370          | .                  | .                  | .                  | .         |
| .                  | .                  | .                  | .                  | .         |
| Vv06g0371          | .                  | .                  | .                  | .         |
| Vv08g0809          | .                  | .                  | .                  | .         |
| Vv06g0372          | .                  | .                  | .                  | Gorai.    |
| 006G120700.1       | .                  | .                  | .                  | .         |
| Vv06g0373          | .                  | .                  | .                  | .         |
| .                  | .                  | .                  | .                  | .         |
| Vv06g0374          | .                  | .                  | .                  | .         |
| .                  | .                  | .                  | .                  | .         |
| Vv06g0375          | .                  | .                  | .                  | .         |
| .                  | .                  | .                  | .                  | .         |
| Vv06g0376          | .                  | .                  | .                  | .         |



|                    |              |   |                    |                    |   |
|--------------------|--------------|---|--------------------|--------------------|---|
| .                  | .            | . | .                  | .                  | . |
| Vv06g0377          | .            | . | Gorai.001G130700.1 | .                  | . |
| 002G249600.1       | Vv08g0824    | . | Tc05_g006010       | Gorai.             | . |
| .                  | .            | . | .                  | .                  | . |
| Vv06g0378          | .            | . | .                  | .                  | . |
| .                  | .            | . | .                  | .                  | . |
| Vv06g0379          | .            | . | .                  | .                  | . |
| .                  | .            | . | .                  | .                  | . |
| Vv06g0380          | .            | . | Gorai.001G103500.1 | Gorai.             | . |
| 004G012900.1       | .            | . | .                  | .                  | . |
| .                  | .            | . | .                  | .                  | . |
| Vv06g0381          | .            | . | .                  | .                  | . |
| .                  | .            | . | .                  | .                  | . |
| Vv06g0382          | .            | . | .                  | .                  | . |
| .                  | .            | . | .                  | Vv13g0630          | . |
| Tc10_g005090       | .            | . | Gorai.011G241200.1 | .                  | . |
| Gorai.010G204400.1 | .            | . | .                  | .                  | . |
| Vv06g0383          | Tc09_g033360 | . | Gorai.001G130300.1 | .                  | . |
| .                  | .            | . | .                  | .                  | . |
| Vv06g0384          | .            | . | .                  | .                  | . |
| .                  | .            | . | .                  | .                  | . |
| Vv06g0385          | .            | . | Gorai.001G130200.1 | .                  | . |
| .                  | .            | . | .                  | .                  | . |
| Vv06g0386          | .            | . | .                  | .                  | . |
| .                  | .            | . | .                  | .                  | . |
| Vv06g0387          | .            | . | .                  | .                  | . |
| .                  | .            | . | .                  | .                  | . |
| Vv06g0388          | .            | . | .                  | .                  | . |
| .                  | .            | . | .                  | .                  | . |
| Vv06g0389          | .            | . | .                  | .                  | . |
| .                  | .            | . | .                  | .                  | . |
| Vv06g0390          | .            | . | .                  | Gorai.009G078900.1 | . |
| .                  | .            | . | .                  | .                  | . |
| Vv06g0391          | .            | . | Gorai.001G130100.1 | .                  | . |
| Gorai.006G111500.1 | .            | . | Vv08g0830          | Tc05_g005970       | . |
| .                  | .            | . | .                  | .                  | . |

|              |                    |                    |   |                    |                    |   |
|--------------|--------------------|--------------------|---|--------------------|--------------------|---|
| Vv06g0392    | .                  | .                  | . | Gorai.001G129800.1 | .                  | . |
|              | Gorai.006G120800.1 | .                  | . | .                  | .                  | . |
| Vv06g0393    | .                  | .                  | . | .                  | .                  | . |
|              | .                  | .                  | . | .                  | Vv13g0618          | . |
| Vv06g0394    | .                  | .                  | . | .                  | .                  | . |
| Vv06g0395    | .                  | .                  | . | Gorai.001G129700.1 | Gorai.             | . |
| 004G012800.1 | .                  | Gorai.006G120900.1 | . | .                  | .                  | . |
|              | .                  | .                  | . | Vv13g0616          | .                  | . |
| Vv06g0396    | .                  | .                  | . | .                  | .                  | . |
| Vv06g0397    | .                  | .                  | . | .                  | .                  | . |
| Vv06g0398    | .                  | .                  | . | .                  | Gorai.009G079100.1 | . |
|              | Gorai.006G121000.1 | .                  | . | .                  | .                  | . |
| Vv06g0399    | .                  | .                  | . | .                  | .                  | . |
| Vv06g0400    | .                  | .                  | . | .                  | Gorai.009G079200.1 | . |
|              | Gorai.006G121100.1 | .                  | . | .                  | .                  | . |
| Vv06g0401    | .                  | .                  | . | .                  | Gorai.009G079300.1 | . |
|              | Gorai.006G168600.1 | .                  | . | .                  | .                  | . |
| Vv06g0402    | .                  | .                  | . | .                  | .                  | . |
| Vv06g0403    | .                  | .                  | . | .                  | .                  | . |
| Vv06g0404    | .                  | .                  | . | Gorai.001G129400.1 | .                  | . |
|              | Gorai.006G119500.1 | .                  | . | .                  | .                  | . |
| Vv06g0405    | .                  | .                  | . | .                  | Gorai.009G079500.1 | . |
| Vv06g0406    | .                  | .                  | . | Gorai.004G012600.1 | .                  | . |

|              |                    |                    |                    |                    |   |   |
|--------------|--------------------|--------------------|--------------------|--------------------|---|---|
|              | Gorai.006G119300.1 | .                  | .                  | .                  | . | . |
|              | .                  | .                  | .                  | .                  | . | . |
| Vv06g0407    | .                  | .                  | Gorai.004G012500.1 | .                  | . | . |
|              | .                  | .                  | .                  | .                  | . | . |
| Vv06g0408    | .                  | .                  | Gorai.001G129300.1 | .                  | . | . |
|              | Vv08g0836          | .                  | Tc05_g005910       | Gorai.006G168800.1 | . | . |
|              | Gorai.002G250300.1 | .                  | .                  | Gorai.007G374500.1 | . | . |
|              | .                  | .                  | .                  | .                  | . | . |
| Vv06g0409    | .                  | .                  | .                  | .                  | . | . |
|              | .                  | .                  | .                  | .                  | . | . |
|              | .                  | .                  | .                  | .                  | . | . |
| Vv06g0410    | .                  | .                  | Gorai.001G126500.1 | Gorai.             | . | . |
| 004G011500.1 | .                  | Gorai.006G116300.1 | .                  | .                  | . | . |
|              | .                  | .                  | Vv13g0590          | .                  | . | . |
| Tc10_g004870 | .                  | Gorai.011G241600.1 | Gorai.009G315600.1 | .                  | . | . |
|              | .                  | .                  | .                  | .                  | . | . |
| Vv06g0411    | .                  | .                  | .                  | .                  | . | . |
|              | .                  | .                  | .                  | .                  | . | . |
|              | .                  | .                  | .                  | .                  | . | . |
| Vv06g0412    | Tc09_g033050       | .                  | .                  | .                  | . | . |
|              | .                  | .                  | .                  | .                  | . | . |
|              | .                  | .                  | .                  | .                  | . | . |
| Vv06g0413    | Tc09_g033040       | .                  | .                  | .                  | . | . |
|              | .                  | .                  | .                  | .                  | . | . |
|              | .                  | .                  | .                  | .                  | . | . |
| Vv06g0414    | .                  | .                  | .                  | .                  | . | . |
|              | .                  | .                  | .                  | .                  | . | . |
|              | .                  | .                  | .                  | .                  | . | . |
| Vv06g0415    | Tc09_g033030       | .                  | .                  | .                  | . | . |
|              | .                  | .                  | .                  | .                  | . | . |
|              | .                  | .                  | .                  | .                  | . | . |
| Vv06g0416    | Tc09_g033020       | .                  | .                  | .                  | . | . |
|              | .                  | .                  | .                  | .                  | . | . |
|              | .                  | .                  | .                  | .                  | . | . |
| Vv06g0417    | .                  | .                  | .                  | .                  | . | . |
|              | .                  | .                  | .                  | .                  | . | . |
|              | .                  | .                  | .                  | .                  | . | . |
| Vv06g0418    | Tc09_g033010       | Gorai.013G266100.1 | .                  | .                  | . | . |
|              | Gorai.009G104500.1 | .                  | .                  | .                  | . | . |
|              | .                  | .                  | .                  | .                  | . | . |
|              | .                  | .                  | .                  | .                  | . | . |
| Vv06g0419    | Tc09_g033000       | Gorai.013G266000.1 | Gorai.             | .                  | . | . |
| 001G105300.1 | Gorai.004G002000.1 | Gorai.009G104400.1 | .                  | .                  | . | . |
|              | Vv08g0903          | .                  | .                  | .                  | . | . |
|              | .                  | .                  | .                  | .                  | . | . |
| Vv06g0420    | Tc09_g032990       | .                  | .                  | .                  | . | . |
|              | .                  | .                  | .                  | .                  | . | . |
|              | .                  | .                  | .                  | .                  | . | . |

|                    |                    |                    |                    |                    |   |
|--------------------|--------------------|--------------------|--------------------|--------------------|---|
| Vv06g0421          | .                  | .                  | .                  | Gorai.004G002100.1 | . |
| Gorai.009G104200.1 | .                  | Gorai.003G139800.1 | .                  | .                  | . |
| .                  | .                  | .                  | .                  | .                  | . |
| Vv06g0422          | Tc09_g032980       | .                  | Gorai.001G105400.1 | .                  | . |
| .                  | .                  | .                  | .                  | .                  | . |
| Vv06g0423          | .                  | .                  | .                  | .                  | . |
| .                  | .                  | .                  | .                  | .                  | . |
| Vv06g0424          | .                  | .                  | .                  | .                  | . |
| .                  | .                  | .                  | .                  | .                  | . |
| Vv06g0425          | .                  | .                  | .                  | .                  | . |
| .                  | .                  | .                  | .                  | .                  | . |
| Vv06g0426          | Tc09_g032960       | .                  | .                  | Gorai.             | . |
| 009G103800.1       | .                  | .                  | .                  | .                  | . |
| .                  | .                  | .                  | .                  | .                  | . |
| Vv06g0427          | Tc09_g032950       | .                  | .                  | Gorai.004G002200.1 | . |
| .                  | .                  | .                  | .                  | .                  | . |
| .                  | Vv13g0583          | .                  | .                  | Gorai.             | . |
| 009G315700.1       | .                  | .                  | .                  | .                  | . |
| Vv06g0428          | Tc09_g032940       | .                  | .                  | .                  | . |
| Gorai.003G139600.1 | .                  | .                  | .                  | .                  | . |
| .                  | .                  | .                  | .                  | .                  | . |
| Vv06g0429          | Tc09_g032930       | .                  | .                  | Gorai.             | . |
| 009G103700.1       | .                  | Vv08g0899          | Tc05_g026640       | .                  | . |
| .                  | .                  | .                  | Vv13g0252          | Tc10_g004650       | . |
| .                  | .                  | .                  | .                  | .                  | . |
| Vv06g0430          | Tc09_g032920       | Gorai.013G265900.1 | .                  | .                  | . |
| Gorai.004G002300.1 | .                  | .                  | .                  | .                  | . |
| .                  | .                  | .                  | .                  | .                  | . |
| Vv06g0431          | Tc09_g032900       | .                  | Gorai.001G105800.1 | .                  | . |
| .                  | Gorai.003G139400.1 | .                  | .                  | .                  | . |
| .                  | .                  | .                  | .                  | .                  | . |
| Vv06g0432          | .                  | .                  | .                  | .                  | . |
| Vv08g0891          | .                  | Gorai.006G177600.1 | Gorai.002G252300.1 | .                  | . |
| .                  | .                  | Vv13g0258          | Tc10_g004580       | .                  | . |
| Gorai.013G024200.1 | .                  | .                  | .                  | .                  | . |
| Vv06g0433          | .                  | .                  | .                  | .                  | . |
| .                  | .                  | .                  | .                  | .                  | . |
| Vv06g0434          | Tc09_g032890       | .                  | .                  | .                  | . |
| Gorai.003G139300.1 | .                  | .                  | .                  | .                  | . |
| .                  | .                  | .                  | .                  | .                  | . |
| Vv06g0435          | Tc09_g032880       | .                  | Gorai.001G105900.1 | .                  | . |
| .                  | Gorai.003G139200.1 | .                  | .                  | .                  | . |

|                    |                    |                    |                    |                    |        |   |   |
|--------------------|--------------------|--------------------|--------------------|--------------------|--------|---|---|
| .                  | .                  | .                  | .                  | .                  | .      | . | . |
| .                  | .                  | .                  | .                  | .                  | .      | . | . |
| Vv06g0436          | .                  | .                  | .                  | .                  | .      | . | . |
| .                  | .                  | .                  | .                  | .                  | .      | . | . |
| .                  | .                  | .                  | .                  | .                  | .      | . | . |
| Vv06g0437          | Tc09_g032870       | .                  | .                  | .                  | .      | . | . |
| Gorai.003G139100.1 | .                  | .                  | .                  | .                  | .      | . | . |
| .                  | .                  | .                  | .                  | .                  | .      | . | . |
| Vv06g0438          | .                  | .                  | Gorai.001G106000.1 | .                  | .      | . | . |
| .                  | .                  | .                  | .                  | .                  | .      | . | . |
| .                  | .                  | .                  | .                  | .                  | .      | . | . |
| Vv06g0439          | Tc09_g032790       | .                  | .                  | .                  | Gorai. | . | . |
| 009G103600.1       | .                  | .                  | .                  | .                  | .      | . | . |
| .                  | .                  | .                  | .                  | .                  | .      | . | . |
| Vv06g0440          | Tc09_g032780       | .                  | Gorai.001G106200.1 | .                  | .      | . | . |
| .                  | .                  | .                  | .                  | .                  | .      | . | . |
| .                  | .                  | .                  | .                  | .                  | .      | . | . |
| Vv06g0441          | Tc09_g032770       | .                  | .                  | .                  | Gorai. | . | . |
| 009G103500.1       | Gorai.003G138900.1 | .                  | .                  | .                  | .      | . | . |
| .                  | .                  | .                  | .                  | .                  | .      | . | . |
| .                  | .                  | .                  | .                  | .                  | .      | . | . |
| Vv06g0442          | Tc09_g032760       | .                  | Gorai.001G106500.1 | .                  | .      | . | . |
| .                  | .                  | .                  | .                  | .                  | .      | . | . |
| .                  | .                  | .                  | .                  | .                  | .      | . | . |
| Vv06g0443          | Tc09_g032750       | .                  | .                  | Gorai.004G002400.1 | .      | . | . |
| Gorai.009G103400.1 | Gorai.003G138700.1 | .                  | .                  | .                  | .      | . | . |
| .                  | .                  | .                  | .                  | .                  | .      | . | . |
| .                  | .                  | .                  | .                  | .                  | .      | . | . |
| Vv06g0444          | Tc09_g032740       | .                  | .                  | Gorai.             | .      | . | . |
| 009G103300.1       | Gorai.003G138600.1 | Vv08g0851          | .                  | .                  | .      | . | . |
| .                  | .                  | .                  | .                  | .                  | .      | . | . |
| .                  | .                  | .                  | .                  | .                  | .      | . | . |
| Vv06g0445          | .                  | .                  | .                  | .                  | .      | . | . |
| .                  | .                  | .                  | .                  | .                  | .      | . | . |
| .                  | .                  | .                  | .                  | .                  | .      | . | . |
| Vv06g0446          | .                  | .                  | .                  | .                  | .      | . | . |
| .                  | .                  | .                  | .                  | .                  | .      | . | . |
| .                  | .                  | .                  | .                  | .                  | .      | . | . |
| Vv06g0447          | .                  | .                  | .                  | .                  | .      | . | . |
| .                  | .                  | .                  | .                  | .                  | .      | . | . |
| .                  | .                  | .                  | .                  | .                  | .      | . | . |
| Vv06g0448          | Tc09_g032590       | .                  | Gorai.001G106600.1 | .                  | .      | . | . |
| Gorai.009G103100.1 | Gorai.003G138200.1 | .                  | .                  | .                  | .      | . | . |
| .                  | .                  | .                  | .                  | .                  | .      | . | . |
| .                  | .                  | .                  | .                  | .                  | .      | . | . |
| Vv06g0449          | .                  | .                  | .                  | Gorai.009G103000.1 | .      | . | . |
| .                  | .                  | .                  | .                  | .                  | .      | . | . |
| .                  | .                  | .                  | .                  | .                  | .      | . | . |
| Vv06g0450          | Tc09_g032560       | Gorai.013G265800.1 | .                  | .                  | .      | . | . |
| Gorai.004G002700.1 | Gorai.009G102900.1 | Gorai.003G138000.1 | .                  | .                  | .      | . | . |

|                    |                    |                    |                    |   |        |   |   |
|--------------------|--------------------|--------------------|--------------------|---|--------|---|---|
| .                  | .                  | .                  | .                  | . | .      | . | . |
| .                  | .                  | .                  | .                  | . | .      | . | . |
| Vv06g0451          | Tc09_g032550       | .                  | Gorai.001G106800.1 | . | .      | . | . |
| .                  | Gorai.003G137900.1 | .                  | .                  | . | .      | . | . |
| .                  | .                  | .                  | .                  | . | .      | . | . |
| .                  | .                  | .                  | .                  | . | .      | . | . |
| Vv06g0452          | Tc09_g032540       | .                  | Gorai.001G106900.1 | . | .      | . | . |
| Gorai.004G003100.1 | .                  | Gorai.003G137800.1 | Vv08g0874          | . | .      | . | . |
| .                  | .                  | .                  | .                  | . | .      | . | . |
| .                  | .                  | .                  | .                  | . | .      | . | . |
| Vv06g0453          | Tc09_g032530       | .                  | Gorai.001G107000.1 | . | .      | . | . |
| Gorai.004G003200.1 | .                  | Gorai.003G137700.1 | .                  | . | .      | . | . |
| .                  | .                  | .                  | .                  | . | .      | . | . |
| .                  | .                  | .                  | .                  | . | .      | . | . |
| Vv06g0454          | .                  | .                  | .                  | . | .      | . | . |
| .                  | .                  | .                  | .                  | . | .      | . | . |
| .                  | .                  | .                  | .                  | . | .      | . | . |
| Vv06g0455          | .                  | .                  | .                  | . | .      | . | . |
| .                  | .                  | .                  | .                  | . | .      | . | . |
| .                  | .                  | .                  | .                  | . | .      | . | . |
| Vv06g0456          | Tc09_g032510       | .                  | .                  | . | Gorai. | . | . |
| 009G102800.1       | .                  | .                  | .                  | . | .      | . | . |
| .                  | Vv13g0278          | .                  | .                  | . | .      | . | . |
| .                  | .                  | .                  | .                  | . | .      | . | . |
| Vv06g0457          | Tc09_g032500       | Gorai.013G265700.1 | .                  | . | .      | . | . |
| Gorai.004G003300.1 | Gorai.009G102700.1 | .                  | .                  | . | .      | . | . |
| .                  | .                  | .                  | .                  | . | .      | . | . |
| .                  | .                  | .                  | .                  | . | .      | . | . |
| Vv06g0458          | Tc09_g032490       | .                  | Gorai.004G003400.1 | . | .      | . | . |
| .                  | .                  | .                  | .                  | . | .      | . | . |
| .                  | .                  | .                  | .                  | . | .      | . | . |
| Vv06g0459          | Tc09_g032460       | .                  | Gorai.             | . | .      | . | . |
| 009G102500.1       | .                  | .                  | .                  | . | .      | . | . |
| .                  | .                  | .                  | .                  | . | .      | . | . |
| .                  | .                  | .                  | .                  | . | .      | . | . |
| Vv06g0460          | Tc09_g032440       | .                  | Gorai.001G107200.1 | . | .      | . | . |
| Gorai.004G003600.1 | .                  | Gorai.003G137600.1 | .                  | . | .      | . | . |
| .                  | .                  | .                  | .                  | . | .      | . | . |
| .                  | .                  | .                  | .                  | . | .      | . | . |
| Vv06g0461          | Tc09_g032430       | .                  | .                  | . | Gorai. | . | . |
| 009G102400.1       | .                  | .                  | .                  | . | .      | . | . |
| .                  | .                  | .                  | .                  | . | .      | . | . |
| .                  | .                  | .                  | .                  | . | .      | . | . |
| Vv06g0462          | .                  | .                  | .                  | . | .      | . | . |
| .                  | .                  | .                  | .                  | . | .      | . | . |
| .                  | .                  | .                  | .                  | . | .      | . | . |
| Vv06g0463          | Tc09_g032420       | .                  | Gorai.001G107300.1 | . | .      | . | . |
| Gorai.009G102300.1 | .                  | .                  | .                  | . | .      | . | . |
| .                  | .                  | Vv13g0285          | .                  | . | .      | . | . |
| .                  | Gorai.010G202800.1 | .                  | .                  | . | .      | . | . |
| Vv06g0464          | .                  | .                  | .                  | . | .      | . | . |
| .                  | .                  | .                  | .                  | . | .      | . | . |

|                    |                    |                    |           |
|--------------------|--------------------|--------------------|-----------|
| Vv06g0465          | Tc09_g032410       | Gorai.001G107400.1 | .         |
|                    | Gorai.009G102200.1 | Gorai.003G137500.1 | Vv08g0865 |
| .                  | .                  | .                  | Vv13g0287 |
| Vv06g0466          | .                  | Gorai.009G316600.1 | .         |
| .                  | .                  | .                  | .         |
| Vv06g0467          | Tc09_g032390       | Gorai.001G107500.1 | .         |
|                    | Gorai.009G102100.1 | Gorai.003G137300.1 | Vv08g0861 |
| .                  | .                  | .                  | .         |
| Vv06g0468          | Tc09_g032380       | .                  | .         |
| Gorai.003G137200.1 | .                  | .                  | .         |
| .                  | Vv13g0292          | Tc10_g000500       | Gorai.    |
| 011G246000.1       | .                  | .                  | .         |
| Vv06g0469          | Tc09_g032370       | .                  | .         |
| .                  | .                  | .                  | .         |
| Vv06g0470          | Tc09_g032350       | .                  | Gorai.    |
| 009G102000.1       | .                  | .                  | .         |
| .                  | .                  | .                  | .         |
| Vv06g0471          | .                  | .                  | .         |
| .                  | .                  | .                  | .         |
| Vv06g0472          | Tc09_g032340       | .                  | .         |
| Gorai.003G137100.1 | .                  | .                  | .         |
| .                  | .                  | .                  | .         |
| Vv06g0473          | Tc09_g032330       | .                  | Gorai.    |
| 009G101900.1       | Gorai.003G137000.1 | .                  | .         |
| .                  | .                  | .                  | .         |
| Vv06g0474          | Tc09_g032320       | .                  | .         |
| Gorai.003G136900.1 | .                  | .                  | .         |
| .                  | .                  | .                  | .         |
| Vv06g0475          | .                  | .                  | .         |
| .                  | .                  | .                  | .         |
| Vv06g0476          | .                  | .                  | .         |
| .                  | .                  | .                  | .         |
| Vv06g0477          | .                  | .                  | .         |
| .                  | .                  | .                  | .         |
| Vv06g0478          | Tc09_g032290       | Gorai.013G265500.1 | Gorai.    |
| 001G107800.1       | .                  | Gorai.003G136700.1 | .         |
| .                  | .                  | .                  | .         |
| Vv06g0479          | Tc09_g032280       | Gorai.013G265400.1 | .         |
| Gorai.009G101700.1 | .                  | Gorai.003G136600.1 | .         |

|                    |                    |                    |                    |           |
|--------------------|--------------------|--------------------|--------------------|-----------|
|                    |                    |                    |                    | Vv13g0315 |
| Tc10_g004200       | .                  | Gorai.011G253100.1 | .                  | .         |
| Vv06g0480          | Tc09_g032270       | .                  | .                  | .         |
| Gorai.003G136500.1 | .                  | .                  | .                  | .         |
| Vv06g0481          | Tc09_g032260       | Gorai.013G265300.1 | Gorai.             | .         |
| 001G107900.1       | .                  | Gorai.003G136400.1 | .                  | .         |
| .                  | .                  | .                  | .                  | .         |
| Vv06g0482          | .                  | .                  | .                  | .         |
| .                  | .                  | .                  | .                  | .         |
| Vv06g0483          | Tc09_g032240       | .                  | Gorai.001G108000.1 | .         |
| Gorai.009G101600.1 | .                  | Gorai.003G136300.1 | .                  | .         |
| .                  | .                  | .                  | Vv13g0323          | .         |
| Tc10_g003860       | .                  | Gorai.011G254000.1 | .                  | .         |
| Vv06g0484          | .                  | .                  | .                  | Vv13g0324 |
| .                  | .                  | .                  | .                  | .         |
| Vv06g0485          | .                  | .                  | .                  | .         |
| .                  | .                  | .                  | .                  | .         |
| Vv06g0486          | Tc09_g032220       | Gorai.013G265200.1 | .                  | .         |
| .                  | Gorai.006G104800.1 | .                  | .                  | .         |
| .                  | .                  | .                  | .                  | .         |
| Vv06g0487          | .                  | .                  | .                  | .         |
| .                  | .                  | .                  | .                  | .         |
| Vv06g0488          | Tc09_g032210       | .                  | .                  | Gorai.    |
| 009G101500.1       | .                  | Vv08g0923          | Tc05_g005000       | Gorai.    |
| 006G175000.1       | Gorai.002G254400.1 | .                  | .                  | .         |
| Vv13g0327          | Tc10_g003840       | Gorai.013G023200.1 | .                  | .         |
| Gorai.009G318200.1 | .                  | .                  | .                  | .         |
| Vv06g0489          | Tc09_g032200       | Gorai.013G265100.1 | .                  | .         |
| Gorai.009G101400.1 | .                  | .                  | .                  | .         |
| .                  | .                  | .                  | .                  | .         |
| Vv06g0490          | .                  | Gorai.001G108300.1 | Gorai.             | .         |
| 004G003900.1       | .                  | Gorai.006G104600.1 | .                  | .         |
| .                  | .                  | .                  | .                  | .         |
| Vv06g0491          | Tc09_g032170       | .                  | .                  | .         |
| Gorai.006G104500.1 | .                  | .                  | .                  | .         |
| .                  | .                  | .                  | .                  | .         |
| Vv06g0492          | .                  | Gorai.013G264900.1 | .                  | .         |
| Gorai.006G104400.1 | .                  | .                  | .                  | .         |
| .                  | .                  | .                  | .                  | .         |
| Vv06g0493          | Tc09_g032160       | .                  | .                  | .         |



|                    |                    |                    |                    |                    |        |   |
|--------------------|--------------------|--------------------|--------------------|--------------------|--------|---|
| .                  | .                  | .                  | .                  | .                  | .      | . |
| .                  | .                  | .                  | .                  | .                  | .      | . |
| Vv06g0494          | Tc09_g032140       | .                  | .                  | Gorai.004G004000.1 | .      | . |
| .                  | .                  | .                  | .                  | .                  | .      | . |
| .                  | .                  | .                  | .                  | .                  | .      | . |
| Vv06g0495          | .                  | .                  | .                  | .                  | .      | . |
| .                  | .                  | .                  | .                  | .                  | .      | . |
| .                  | .                  | .                  | .                  | .                  | .      | . |
| Vv06g0496          | Tc09_g032130       | Gorai.013G264800.1 | .                  | .                  | .      | . |
| .                  | Gorai.003G135600.1 | Vv08g0925          | .                  | .                  | .      | . |
| Tc05_g004990       | .                  | Gorai.002G254800.1 | .                  | .                  | .      | . |
| Vv13g0333          | Tc10_g003700       | Gorai.013G022900.1 | .                  | .                  | .      | . |
| .                  | .                  | Gorai.012G069600.1 | .                  | .                  | .      | . |
| Vv06g0497          | Tc09_g032120       | .                  | .                  | .                  | .      | . |
| Gorai.003G135500.1 | .                  | .                  | .                  | .                  | .      | . |
| .                  | .                  | .                  | .                  | .                  | .      | . |
| .                  | .                  | .                  | .                  | .                  | .      | . |
| Vv06g0498          | Tc09_g032110       | Gorai.013G264700.1 | .                  | .                  | .      | . |
| .                  | Gorai.006G103900.1 | .                  | .                  | .                  | .      | . |
| .                  | .                  | .                  | .                  | .                  | .      | . |
| .                  | .                  | .                  | .                  | .                  | .      | . |
| Vv06g0499          | .                  | .                  | .                  | .                  | .      | . |
| .                  | .                  | .                  | .                  | .                  | .      | . |
| .                  | .                  | .                  | .                  | .                  | .      | . |
| Vv06g0500          | .                  | .                  | .                  | .                  | Gorai. | . |
| 006G101600.1       | .                  | .                  | .                  | .                  | .      | . |
| .                  | .                  | .                  | .                  | .                  | .      | . |
| Vv06g0501          | .                  | .                  | .                  | .                  | .      | . |
| .                  | .                  | .                  | .                  | .                  | .      | . |
| .                  | .                  | .                  | .                  | .                  | .      | . |
| Vv06g0502          | .                  | .                  | .                  | .                  | .      | . |
| .                  | .                  | .                  | .                  | .                  | .      | . |
| .                  | .                  | .                  | .                  | .                  | .      | . |
| Vv06g0503          | .                  | .                  | .                  | .                  | .      | . |
| .                  | .                  | .                  | .                  | .                  | .      | . |
| .                  | .                  | .                  | .                  | .                  | .      | . |
| Vv06g0504          | Tc09_g032080       | Gorai.013G264600.1 | Gorai.             | .                  | .      | . |
| 001G108500.1       | Gorai.004G004300.1 | .                  | Gorai.003G135200.1 | .                  | .      | . |
| .                  | .                  | .                  | .                  | .                  | .      | . |
| .                  | .                  | .                  | .                  | .                  | .      | . |
| Vv06g0505          | Tc09_g032070       | .                  | Gorai.004G004400.1 | .                  | .      | . |
| .                  | Gorai.003G135100.1 | .                  | .                  | .                  | .      | . |
| .                  | .                  | .                  | .                  | .                  | .      | . |
| .                  | .                  | .                  | .                  | .                  | .      | . |
| Vv06g0506          | Tc09_g032060       | Gorai.013G264500.1 | .                  | .                  | .      | . |
| .                  | Gorai.003G135000.1 | .                  | .                  | .                  | .      | . |
| .                  | .                  | Vv13g0344          | Tc10_g003640       | .                  | .      | . |
| Gorai.013G022700.1 | .                  | .                  | .                  | .                  | .      | . |
| Vv06g0507          | Tc09_g032050       | Gorai.013G264400.1 | .                  | .                  | .      | . |
| Gorai.004G004600.1 | .                  | Gorai.003G134900.1 | Vv08g0934          | .                  | .      | . |
| Tc05_g004880       | .                  | Gorai.002G255200.1 | .                  | .                  | .      | . |

|                    |                    |                    |                    |        |
|--------------------|--------------------|--------------------|--------------------|--------|
| Gorai.012G102800.1 | .                  | Vv13g0346          | Tc10_g003630       | .      |
| Vv06g0508          | Tc09_g032040       | .                  | .                  | Gorai. |
| 009G101000.1       | Gorai.003G134700.1 | .                  | .                  | .      |
| .                  | .                  | .                  | .                  | .      |
| Vv06g0509          | Tc09_g032030       | .                  | .                  | Gorai. |
| 009G100900.1       | Gorai.003G134600.1 | .                  | .                  | .      |
| .                  | .                  | Vv13g0350          | Tc10_g003610       | .      |
| Gorai.011G256100.1 | .                  | .                  | Gorai.012G070000.1 | .      |
| Vv06g0510          | Tc09_g032020       | Gorai.001G108600.1 | .                  | .      |
| .                  | Vv08g0941          | Tc05_g004820       | .                  | .      |
| Gorai.002G258600.1 | .                  | .                  | .                  | .      |
| Vv06g0511          | Tc09_g032010       | .                  | .                  | .      |
| Gorai.003G134500.1 | .                  | .                  | .                  | .      |
| Vv06g0512          | Tc09_g032000       | Gorai.001G108700.1 | .                  | .      |
| Gorai.009G100800.1 | .                  | .                  | .                  | .      |
| .                  | .                  | .                  | .                  | .      |
| Vv06g0513          | Tc09_g031990       | Gorai.013G264300.1 | Gorai.             | .      |
| 001G108800.1       | Gorai.009G100700.1 | Gorai.003G134400.1 | .                  | .      |
| Vv08g0943          | .                  | .                  | .                  | .      |
| Vv13g0356          | Tc10_g003480       | .                  | .                  | .      |
| Vv06g0514          | Tc09_g031980       | .                  | .                  | Gorai. |
| 009G100600.1       | Gorai.003G134300.1 | .                  | .                  | .      |
| .                  | .                  | .                  | .                  | .      |
| Vv06g0515          | Tc09_g031970       | .                  | .                  | .      |
| Gorai.003G134000.1 | .                  | .                  | .                  | .      |
| Vv06g0516          | Tc09_g031960       | .                  | .                  | Gorai. |
| 009G100400.1       | Gorai.003G133700.1 | Vv08g0944          | .                  | .      |
| Tc05_g004790       | Gorai.006G174000.1 | Gorai.002G258500.1 | .                  | .      |
| .                  | Gorai.007G375600.1 | Vv13g0357          | .                  | .      |
| Tc10_g003470       | Gorai.011G256600.1 | .                  | Gorai.             | .      |
| 010G202100.1       | .                  | .                  | .                  | .      |
| Vv06g0517          | Tc09_g031950       | .                  | .                  | Gorai. |
| 009G100300.1       | Vv08g0945          | Tc05_g004780       | .                  | .      |
| Gorai.002G258400.1 | .                  | Gorai.012G103100.1 | .                  | .      |
| Vv13g0358          | Tc10_g003460       | .                  | Gorai.009G319000.1 | .      |
| Vv06g0518          | Tc09_g031940       | Gorai.013G264200.1 | Gorai.             | .      |
| 001G108900.1       | .                  | .                  | .                  | .      |
| .                  | .                  | .                  | .                  | .      |
| Vv06g0519          | Tc09_g031930       | Gorai.001G109100.1 | .                  | .      |
| Gorai.009G100200.1 | Gorai.003G133600.1 | .                  | .                  | .      |

|                    |                    |                    |                    |                    |
|--------------------|--------------------|--------------------|--------------------|--------------------|
|                    |                    |                    |                    | Vv13g0360          |
| Tc10_g003430       | Gorai.013G022600.1 |                    | Gorai.011G256800.1 |                    |
| Gorai.009G319200.1 |                    |                    |                    |                    |
| Vv06g0520          |                    |                    |                    |                    |
|                    |                    |                    |                    |                    |
| Vv06g0521          | Tc09_g031910       |                    |                    |                    |
| Gorai.003G133500.1 |                    |                    |                    |                    |
|                    |                    |                    |                    |                    |
| Vv06g0522          | Tc09_g031900       |                    |                    |                    |
| Gorai.003G133400.1 |                    |                    |                    |                    |
|                    |                    |                    |                    |                    |
| Vv06g0523          |                    |                    |                    |                    |
|                    |                    |                    |                    |                    |
|                    |                    |                    |                    |                    |
| Vv06g0524          | Tc09_g031890       |                    | Gorai.001G109300.1 |                    |
| Gorai.004G004800.1 | Gorai.009G100100.1 |                    | Gorai.003G133200.1 |                    |
| Vv08g0949          | Tc05_g004730       |                    | Gorai.006G173700.1 |                    |
|                    | Gorai.012G103400.1 |                    | Vv13g0381          |                    |
| Gorai.013G022500.1 |                    |                    | Gorai.009G319300.1 |                    |
|                    |                    |                    |                    |                    |
| Vv06g0525          | Tc09_g031880       |                    | Gorai.001G109500.1 |                    |
| Gorai.009G100000.1 |                    |                    | Gorai.003G133100.1 |                    |
|                    |                    |                    |                    |                    |
|                    |                    |                    |                    |                    |
| Vv06g0526          | Tc09_g031870       |                    |                    |                    |
|                    |                    |                    |                    |                    |
|                    |                    |                    |                    |                    |
| Vv06g0527          |                    |                    |                    | Gorai.             |
| 003G133000.1       |                    |                    |                    |                    |
|                    |                    |                    |                    |                    |
| Vv06g0528          |                    |                    |                    |                    |
|                    |                    |                    |                    |                    |
|                    |                    |                    |                    |                    |
| Vv06g0529          | Tc09_g031840       |                    | Gorai.001G110100.1 |                    |
| Gorai.009G099800.1 |                    |                    | Gorai.003G132700.1 |                    |
|                    |                    |                    |                    |                    |
|                    |                    |                    |                    |                    |
| Vv06g0530          | Tc09_g031830       |                    | Gorai.001G110200.1 |                    |
| Gorai.009G099700.1 |                    |                    | Vv08g0952          |                    |
| Tc05_g004680       |                    |                    |                    |                    |
|                    |                    |                    |                    |                    |
| Vv06g0531          | Tc09_g031810       | Gorai.013G264100.1 |                    | Gorai.             |
| 001G110400.1       | Gorai.004G004900.1 |                    |                    | Gorai.003G132400.1 |
|                    |                    |                    |                    |                    |
|                    |                    |                    |                    |                    |
| Vv06g0532          | Tc09_g031800       | Gorai.013G264000.1 |                    |                    |
|                    |                    |                    |                    |                    |
|                    |                    |                    |                    |                    |
| Vv06g0533          | Tc09_g031790       |                    |                    | Gorai.             |

|              |                    |                    |   |        |   |
|--------------|--------------------|--------------------|---|--------|---|
| 009G099500.1 | Gorai.003G132300.1 | .                  | . | .      | . |
| .            | .                  | .                  | . | .      | . |
| .            | .                  | .                  | . | .      | . |
| Vv06g0534    | Tc09_g031780       | .                  | . | Gorai. | . |
| 009G099400.1 | Gorai.003G132200.1 | Vv08g0958          | . | .      | . |
| Tc05_g004600 | Gorai.006G172900.1 | .                  | . | Gorai. | . |
| 009G421600.1 | .                  | .                  | . | .      | . |
| .            | .                  | .                  | . | .      | . |
| Vv06g0535    | Tc09_g031770       | Gorai.001G110500.1 | . | .      | . |
| .            | Gorai.003G132100.1 | .                  | . | .      | . |
| .            | .                  | .                  | . | .      | . |
| .            | .                  | .                  | . | .      | . |
| Vv06g0536    | Tc09_g031760       | .                  | . | Gorai. | . |
| 009G099300.1 | Gorai.003G132000.1 | Vv08g0959          | . | .      | . |
| Tc05_g004590 | .                  | Gorai.007G375900.1 | . | .      | . |
| .            | .                  | .                  | . | .      | . |
| Vv06g0537    | .                  | .                  | . | .      | . |
| .            | .                  | .                  | . | .      | . |
| .            | .                  | .                  | . | .      | . |
| Vv06g0538    | .                  | .                  | . | .      | . |
| Vv08g0960    | Tc05_g004580       | Gorai.002G257700.1 | . | .      | . |
| .            | Gorai.007G376000.1 | .                  | . | .      | . |
| .            | .                  | .                  | . | .      | . |
| Vv06g0539    | .                  | .                  | . | .      | . |
| .            | .                  | .                  | . | .      | . |
| .            | .                  | .                  | . | .      | . |
| Vv06g0540    | .                  | .                  | . | .      | . |
| .            | .                  | .                  | . | .      | . |
| .            | .                  | .                  | . | .      | . |
| Vv06g0541    | .                  | .                  | . | .      | . |
| .            | .                  | .                  | . | .      | . |
| .            | .                  | .                  | . | .      | . |
| Vv06g0542    | .                  | .                  | . | .      | . |
| .            | .                  | .                  | . | .      | . |
| .            | .                  | .                  | . | .      | . |
| Vv06g0543    | .                  | .                  | . | .      | . |
| .            | .                  | .                  | . | .      | . |
| .            | .                  | .                  | . | .      | . |
| Vv06g0544    | .                  | .                  | . | .      | . |
| .            | .                  | .                  | . | .      | . |
| .            | .                  | .                  | . | .      | . |
| Vv06g0545    | .                  | .                  | . | .      | . |
| .            | .                  | .                  | . | .      | . |
| .            | .                  | .                  | . | .      | . |
| Vv06g0546    | .                  | .                  | . | .      | . |
| .            | .                  | .                  | . | .      | . |
| .            | .                  | .                  | . | .      | . |
| Vv06g0547    | .                  | .                  | . | .      | . |
| .            | .                  | .                  | . | .      | . |
| .            | .                  | .                  | . | .      | . |

|                    |                    |                    |                    |   |   |   |   |
|--------------------|--------------------|--------------------|--------------------|---|---|---|---|
| Vv06g0548          | .                  | .                  | .                  | . | . | . | . |
| .                  | .                  | .                  | .                  | . | . | . | . |
| Vv06g0549          | .                  | .                  | Gorai.001G110600.1 | . | . | . | . |
| .                  | .                  | .                  | .                  | . | . | . | . |
| Vv06g0550          | Tc09_g031750       | .                  | Gorai.001G110700.1 | . | . | . | . |
| .                  | .                  | .                  | .                  | . | . | . | . |
| Vv06g0551          | .                  | .                  | .                  | . | . | . | . |
| .                  | .                  | .                  | .                  | . | . | . | . |
| Vv06g0552          | Tc09_g031700       | Gorai.013G263900.1 | .                  | . | . | . | . |
| .                  | Gorai.003G131900.1 | Vv08g0962          | .                  | . | . | . | . |
| .                  | .                  | .                  | .                  | . | . | . | . |
| Vv06g0553          | .                  | .                  | .                  | . | . | . | . |
| .                  | .                  | .                  | .                  | . | . | . | . |
| Vv06g0554          | .                  | .                  | .                  | . | . | . | . |
| .                  | .                  | .                  | .                  | . | . | . | . |
| Vv06g0555          | Tc09_g031660       | Gorai.013G263800.1 | .                  | . | . | . | . |
| .                  | .                  | .                  | .                  | . | . | . | . |
| Vv06g0556          | .                  | .                  | .                  | . | . | . | . |
| .                  | .                  | .                  | .                  | . | . | . | . |
| Vv06g0557          | Tc09_g031650       | Gorai.013G263700.1 | Gorai.             | . | . | . | . |
| 001G110900.1       | Gorai.009G099200.1 | .                  | .                  | . | . | . | . |
| .                  | .                  | .                  | .                  | . | . | . | . |
| Vv06g0558          | .                  | .                  | .                  | . | . | . | . |
| .                  | .                  | .                  | .                  | . | . | . | . |
| Vv06g0559          | Tc09_g031630       | .                  | Gorai.004G005000.1 | . | . | . | . |
| Gorai.009G099100.1 | .                  | Gorai.003G131500.1 | .                  | . | . | . | . |
| .                  | .                  | .                  | .                  | . | . | . | . |
| Vv06g0560          | Tc09_g031620       | Gorai.013G263600.1 | .                  | . | . | . | . |
| Gorai.009G099000.1 | .                  | .                  | .                  | . | . | . | . |
| .                  | .                  | .                  | .                  | . | . | . | . |
| Vv06g0561          | Tc09_g031610       | Gorai.013G263500.1 | .                  | . | . | . | . |
| Gorai.009G098900.1 | .                  | .                  | .                  | . | . | . | . |
| .                  | .                  | .                  | .                  | . | . | . | . |
| Vv06g0562          | .                  | .                  | .                  | . | . | . | . |
| .                  | .                  | .                  | .                  | . | . | . | . |
| .                  | .                  | .                  | .                  | . | . | . | . |

|              |                    |                    |                    |                    |   |           |   |
|--------------|--------------------|--------------------|--------------------|--------------------|---|-----------|---|
| Vv06g0563    | .                  | .                  | .                  | .                  | . | .         | . |
| .            | .                  | .                  | .                  | .                  | . | .         | . |
| Vv06g0564    | .                  | Gorai.013G263400.1 | .                  | .                  | . | .         | . |
| .            | .                  | .                  | .                  | .                  | . | .         | . |
| Vv13g0392    | Tc10_g003060       | .                  | Gorai.011G265400.1 | .                  | . | .         | . |
| .            | Gorai.010G201400.1 | Gorai.012G071000.1 | .                  | .                  | . | .         | . |
| Vv06g0565    | Tc09_g031590       | .                  | .                  | .                  | . | .         | . |
| .            | .                  | .                  | .                  | .                  | . | .         | . |
| Vv06g0566    | .                  | .                  | .                  | .                  | . | Vv13g0394 | . |
| .            | .                  | .                  | .                  | .                  | . | .         | . |
| Vv06g0567    | Tc09_g031580       | .                  | Gorai.001G111100.1 | .                  | . | .         | . |
| .            | Gorai.009G098800.1 | Gorai.003G131000.1 | Vv08g0967          | .                  | . | .         | . |
| .            | Tc05_g004480       | Gorai.006G172400.1 | Gorai.002G257400.1 | .                  | . | .         | . |
| .            | Gorai.012G104400.1 | Gorai.007G376300.1 | .                  | .                  | . | .         | . |
| Vv13g0395    | .                  | Gorai.013G022200.1 | Gorai.011G266000.1 | .                  | . | .         | . |
| .            | .                  | .                  | .                  | .                  | . | .         | . |
| Vv06g0568    | .                  | .                  | .                  | .                  | . | .         | . |
| .            | .                  | .                  | .                  | .                  | . | .         | . |
| Vv06g0569    | .                  | .                  | .                  | .                  | . | .         | . |
| .            | .                  | .                  | .                  | .                  | . | .         | . |
| Vv06g0570    | Tc09_g031570       | .                  | .                  | Gorai.             | . | .         | . |
| 009G098700.1 | Gorai.003G130900.1 | Vv08g0970          | .                  | .                  | . | .         | . |
| Tc05_g004460 | Gorai.006G172200.1 | .                  | .                  | .                  | . | .         | . |
| .            | .                  | .                  | .                  | .                  | . | .         | . |
| Vv06g0571    | Tc09_g031560       | .                  | Gorai.001G111200.1 | .                  | . | .         | . |
| .            | Gorai.009G098600.1 | .                  | .                  | .                  | . | .         | . |
| .            | .                  | .                  | .                  | .                  | . | .         | . |
| Vv06g0572    | Tc09_g031550       | .                  | Gorai.001G111300.1 | .                  | . | .         | . |
| .            | .                  | .                  | .                  | .                  | . | .         | . |
| Vv06g0573    | Tc09_g031540       | .                  | Gorai.001G111400.1 | .                  | . | .         | . |
| .            | Gorai.009G098500.1 | Gorai.003G130800.1 | .                  | .                  | . | .         | . |
| .            | .                  | .                  | .                  | .                  | . | .         | . |
| Vv06g0574    | Tc09_g031530       | .                  | .                  | .                  | . | .         | . |
| .            | Vv08g0971          | Tc05_g004450       | Gorai.006G172100.1 | .                  | . | .         | . |
| .            | .                  | .                  | .                  | .                  | . | .         | . |
| Vv06g0575    | .                  | .                  | .                  | Gorai.009G098400.1 | . | .         | . |
| .            | .                  | .                  | .                  | .                  | . | .         | . |
| Vv06g0576    | Tc09_g031520       | .                  | .                  | Gorai.             | . | .         | . |
| 009G098300.1 | Gorai.003G130700.1 | Vv08g0973          | .                  | .                  | . | .         | . |
| Tc05_g004440 | .                  | .                  | .                  | .                  | . | Vv13g0396 | . |

|                    |                    |                    |        |
|--------------------|--------------------|--------------------|--------|
| .                  | Gorai.013G021300.1 | Gorai.011G266100.1 | .      |
| .                  | .                  | .                  | .      |
| Vv06g0577          | Tc09_g031510       | Gorai.001G111500.1 | .      |
| Gorai.004G005200.1 | .                  | Gorai.003G130600.1 | .      |
| .                  | .                  | .                  | .      |
| .                  | .                  | .                  | .      |
| Vv06g0578          | Tc09_g031500       | .                  | Gorai. |
| 009G098200.1       | Gorai.003G130500.1 | .                  | .      |
| .                  | .                  | Vv13g0398          | .      |
| .                  | .                  | .                  | .      |
| Vv06g0579          | Tc09_g031490       | Gorai.001G111600.1 | .      |
| .                  | Vv08g0975          | Tc05_g004430       | .      |
| .                  | Gorai.007G376400.1 | Vv13g0400          | .      |
| .                  | .                  | .                  | .      |
| Vv06g0580          | Tc09_g031480       | .                  | Gorai. |
| 009G098100.1       | Gorai.003G130400.1 | .                  | .      |
| .                  | .                  | Vv13g0402          | .      |
| .                  | .                  | .                  | .      |
| Vv06g0581          | Tc09_g031460       | .                  | Gorai. |
| 009G098000.1       | Gorai.003G130300.1 | .                  | .      |
| .                  | .                  | .                  | .      |
| .                  | .                  | .                  | .      |
| Vv06g0582          | Tc09_g031450       | .                  | .      |
| Gorai.003G130200.1 | .                  | .                  | .      |
| .                  | .                  | .                  | .      |
| Vv06g0583          | Tc09_g031440       | Gorai.004G005300.1 | .      |
| .                  | Gorai.003G130000.1 | Vv08g0978          | .      |
| Tc05_g004400       | Gorai.002G257300.1 | .                  | Gorai. |
| 012G104700.1       | Gorai.007G376500.1 | .                  | .      |
| .                  | .                  | .                  | .      |
| Vv06g0584          | Tc09_g031420       | .                  | Gorai. |
| 009G097900.1       | .                  | .                  | .      |
| .                  | .                  | .                  | .      |
| Vv06g0585          | Tc09_g031410       | .                  | Gorai. |
| 009G097800.1       | .                  | .                  | .      |
| .                  | .                  | .                  | .      |
| Vv06g0586          | Tc09_g031400       | Gorai.001G111700.1 | .      |
| .                  | Gorai.003G129900.1 | .                  | .      |
| .                  | .                  | .                  | .      |
| .                  | .                  | .                  | .      |
| Vv06g0587          | .                  | .                  | .      |
| .                  | .                  | .                  | .      |
| .                  | .                  | .                  | .      |
| Vv06g0588          | Tc09_g031350       | .                  | Gorai. |
| 009G097300.1       | .                  | .                  | .      |
| .                  | .                  | .                  | .      |
| .                  | .                  | .                  | .      |
| Vv06g0589          | Tc09_g031340       | Gorai.013G263100.1 | .      |
| .                  | Gorai.003G129400.1 | .                  | .      |
| .                  | .                  | .                  | .      |
| .                  | .                  | .                  | .      |

|                    |                    |                    |                    |   |   |   |   |
|--------------------|--------------------|--------------------|--------------------|---|---|---|---|
| Vv06g0590          | .                  | .                  | .                  | . | . | . | . |
| .                  | .                  | .                  | .                  | . | . | . | . |
| Vv06g0591          | Tc09_g031330       | .                  | Gorai.001G111900.1 | . | . | . | . |
| .                  | Gorai.003G129300.1 | .                  | .                  | . | . | . | . |
| .                  | .                  | .                  | .                  | . | . | . | . |
| Vv06g0592          | Tc09_g031320       | .                  | .                  | . | . | . | . |
| .                  | .                  | .                  | .                  | . | . | . | . |
| Vv13g0416          | .                  | .                  | .                  | . | . | . | . |
| Vv06g0593          | .                  | Gorai.001G112000.1 | Gorai.             | . | . | . | . |
| 004G005400.1       | Gorai.009G097200.1 | Gorai.003G129200.1 | Vv13g0417          | . | . | . | . |
| .                  | .                  | .                  | .                  | . | . | . | . |
| Vv06g0594          | Tc09_g031310       | .                  | Gorai.001G112100.1 | . | . | . | . |
| .                  | .                  | .                  | .                  | . | . | . | . |
| Vv06g0595          | .                  | .                  | .                  | . | . | . | . |
| .                  | .                  | .                  | .                  | . | . | . | . |
| Vv06g0596          | Tc09_g031300       | .                  | Gorai.001G112200.1 | . | . | . | . |
| Gorai.009G097100.1 | Gorai.003G129100.1 | .                  | .                  | . | . | . | . |
| .                  | .                  | .                  | .                  | . | . | . | . |
| Vv06g0597          | Tc09_g031290       | Gorai.013G263000.1 | .                  | . | . | . | . |
| .                  | .                  | .                  | .                  | . | . | . | . |
| Vv06g0598          | Tc09_g031280       | .                  | Gorai.             | . | . | . | . |
| 009G097000.1       | .                  | .                  | .                  | . | . | . | . |
| .                  | .                  | .                  | .                  | . | . | . | . |
| Vv06g0599          | Tc09_g031270       | .                  | Gorai.004G005500.1 | . | . | . | . |
| .                  | .                  | .                  | .                  | . | . | . | . |
| Vv06g0600          | Tc09_g031260       | Gorai.013G262900.1 | Gorai.             | . | . | . | . |
| 001G112300.1       | Gorai.009G096900.1 | .                  | .                  | . | . | . | . |
| .                  | .                  | .                  | .                  | . | . | . | . |
| Vv06g0601          | Tc09_g031250       | .                  | .                  | . | . | . | . |
| .                  | .                  | .                  | .                  | . | . | . | . |
| Vv06g0602          | Tc09_g031230       | .                  | .                  | . | . | . | . |
| .                  | .                  | .                  | .                  | . | . | . | . |
| Vv06g0603          | .                  | .                  | .                  | . | . | . | . |
| Vv08g1004          | Tc05_g004060       | .                  | Gorai.             | . | . | . | . |
| 012G106000.1       | Vv13g0423          | .                  | Gorai.             | . | . | . | . |
| 011G267600.1       | Gorai.010G200600.1 | .                  | .                  | . | . | . | . |
| Vv06g0604          | Tc09_g031210       | .                  | .                  | . | . | . | . |
| Gorai.003G129000.1 | .                  | .                  | .                  | . | . | . | . |
| .                  | .                  | .                  | .                  | . | . | . | . |



|                    |                    |              |                    |   |
|--------------------|--------------------|--------------|--------------------|---|
| Vv06g0605          | Tc09_g031190       | .            | Gorai.001G112500.1 | . |
|                    | Gorai.009G096500.1 | .            | .                  | . |
| .                  | .                  | .            | .                  | . |
| Vv06g0606          | Tc09_g031180       | .            | Gorai.013G262700.1 | . |
| .                  | .                  | .            | .                  | . |
| .                  | .                  | .            | .                  | . |
| Vv06g0607          | .                  | .            | .                  | . |
| .                  | .                  | .            | .                  | . |
| .                  | .                  | .            | .                  | . |
| Vv06g0608          | Tc09_g031170       | .            | Gorai.001G112600.1 | . |
| .                  | .                  | .            | .                  | . |
| .                  | .                  | .            | .                  | . |
| Vv06g0609          | .                  | .            | .                  | . |
| .                  | .                  | .            | .                  | . |
| .                  | .                  | .            | .                  | . |
| Vv06g0610          | .                  | .            | .                  | . |
| Vv08g1008          | Tc05_g004020       | .            | .                  | . |
|                    | Vv13g0431          | .            | Gorai.011G268000.1 | . |
| .                  | .                  | .            | .                  | . |
| Vv06g0611          | Tc09_g031160       | .            | Gorai.001G112700.1 | . |
| .                  | .                  | .            | .                  | . |
| .                  | .                  | .            | .                  | . |
| Vv06g0612          | .                  | .            | Gorai.013G262600.1 | . |
| Gorai.009G096400.1 | .                  | .            | .                  | . |
| .                  | .                  | .            | .                  | . |
| .                  | .                  | .            | .                  | . |
| Vv06g0613          | .                  | .            | .                  | . |
| .                  | .                  | .            | .                  | . |
| .                  | .                  | .            | .                  | . |
| Vv06g0614          | .                  | .            | .                  | . |
| .                  | .                  | .            | .                  | . |
| .                  | .                  | .            | .                  | . |
| Vv06g0615          | Tc09_g031150       | .            | .                  | . |
|                    | Vv08g1013          | Tc05_g003990 | .                  | . |
| .                  | .                  | .            | .                  | . |
| Vv06g0616          | .                  | .            | Gorai.013G262500.1 | . |
| Gorai.009G096300.1 | .                  | .            | .                  | . |
| .                  | .                  | .            | .                  | . |
| .                  | .                  | .            | .                  | . |
| Vv06g0617          | Tc09_g031140       | .            | .                  | . |
| .                  | .                  | .            | .                  | . |
| .                  | .                  | .            | .                  | . |
| Vv06g0618          | .                  | .            | .                  | . |
| .                  | .                  | .            | .                  | . |
| .                  | .                  | .            | .                  | . |
| Vv06g0619          | .                  | .            | Gorai.013G262400.1 | . |
| .                  | .                  | .            | .                  | . |
| .                  | .                  | .            | .                  | . |
| Vv06g0620          | Tc09_g031130       | .            | .                  | . |

|           |              |                    |   |   |   |   |   |
|-----------|--------------|--------------------|---|---|---|---|---|
| .         | .            | .                  | . | . | . | . | . |
| .         | .            | .                  | . | . | . | . | . |
| Vv06g0621 | .            | Gorai.013G262300.1 | . | . | . | . | . |
| .         | Vv08g1014    | .                  | . | . | . | . | . |
| .         | .            | .                  | . | . | . | . | . |
| Vv06g0622 | Tc09_g031120 | .                  | . | . | . | . | . |
| .         | .            | .                  | . | . | . | . | . |
| .         | .            | .                  | . | . | . | . | . |
| Vv06g0623 | .            | .                  | . | . | . | . | . |
| .         | .            | .                  | . | . | . | . | . |
| .         | .            | .                  | . | . | . | . | . |
| Vv06g0624 | Tc09_g031110 | Gorai.013G262200.1 | . | . | . | . | . |
| .         | .            | .                  | . | . | . | . | . |
| .         | .            | .                  | . | . | . | . | . |
| Vv06g0625 | .            | .                  | . | . | . | . | . |
| .         | .            | .                  | . | . | . | . | . |
| .         | .            | .                  | . | . | . | . | . |
| Vv06g0626 | .            | .                  | . | . | . | . | . |
| .         | .            | .                  | . | . | . | . | . |
| .         | .            | .                  | . | . | . | . | . |
| Vv06g0627 | Tc09_g031100 | .                  | . | . | . | . | . |
| .         | .            | .                  | . | . | . | . | . |
| .         | .            | .                  | . | . | . | . | . |
| Vv06g0628 | .            | .                  | . | . | . | . | . |
| .         | .            | .                  | . | . | . | . | . |
| .         | .            | .                  | . | . | . | . | . |
| Vv06g0629 | Tc09_g031090 | Gorai.013G262100.1 | . | . | . | . | . |
| .         | .            | .                  | . | . | . | . | . |
| .         | .            | .                  | . | . | . | . | . |
| Vv06g0630 | .            | .                  | . | . | . | . | . |
| .         | .            | .                  | . | . | . | . | . |
| .         | .            | .                  | . | . | . | . | . |
| Vv06g0631 | .            | .                  | . | . | . | . | . |
| .         | .            | .                  | . | . | . | . | . |
| .         | .            | .                  | . | . | . | . | . |
| Vv06g0632 | .            | .                  | . | . | . | . | . |
| .         | .            | .                  | . | . | . | . | . |
| .         | .            | .                  | . | . | . | . | . |
| Vv06g0633 | .            | .                  | . | . | . | . | . |
| .         | .            | .                  | . | . | . | . | . |
| .         | .            | .                  | . | . | . | . | . |
| Vv06g0634 | Tc09_g031080 | .                  | . | . | . | . | . |
| .         | .            | .                  | . | . | . | . | . |
| .         | .            | .                  | . | . | . | . | . |
| Vv06g0635 | Tc09_g031070 | Gorai.013G262000.1 | . | . | . | . | . |
| .         | .            | .                  | . | . | . | . | . |
| .         | .            | .                  | . | . | . | . | . |
| Vv06g0636 | .            | .                  | . | . | . | . | . |
| .         | .            | .                  | . | . | . | . | . |
| .         | .            | .                  | . | . | . | . | . |

|                    |                    |                    |   |                    |   |                    |   |
|--------------------|--------------------|--------------------|---|--------------------|---|--------------------|---|
| Vv06g0637          | .                  | .                  | . | .                  | . | .                  | . |
| .                  | .                  | .                  | . | .                  | . | .                  | . |
| .                  | .                  | .                  | . | .                  | . | .                  | . |
| Vv06g0638          | Tc09_g031060       | .                  | . | .                  | . | Gorai.             | . |
| 009G096200.1       | Gorai.003G128900.1 | .                  | . | Vv13g0440          | . | .                  | . |
| Tc10_g001270       | .                  | .                  | . | .                  | . | .                  | . |
| .                  | .                  | .                  | . | .                  | . | .                  | . |
| Vv06g0639          | Tc09_g031050       | Gorai.013G261900.1 | . | .                  | . | .                  | . |
| .                  | Gorai.003G128800.1 | Vv13g0441          | . | .                  | . | .                  | . |
| .                  | .                  | .                  | . | .                  | . | .                  | . |
| .                  | .                  | .                  | . | .                  | . | .                  | . |
| Vv06g0640          | .                  | Gorai.013G261800.1 | . | .                  | . | .                  | . |
| Gorai.003G128700.1 | .                  | .                  | . | .                  | . | .                  | . |
| .                  | .                  | .                  | . | .                  | . | .                  | . |
| .                  | .                  | .                  | . | .                  | . | .                  | . |
| Vv06g0641          | Tc09_g031020       | .                  | . | .                  | . | .                  | . |
| Gorai.003G128600.1 | .                  | .                  | . | .                  | . | .                  | . |
| .                  | .                  | .                  | . | .                  | . | .                  | . |
| Vv06g0642          | Tc09_g031010       | .                  | . | .                  | . | .                  | . |
| Gorai.003G128500.1 | .                  | .                  | . | .                  | . | .                  | . |
| .                  | .                  | .                  | . | .                  | . | .                  | . |
| Vv06g0643          | .                  | .                  | . | .                  | . | .                  | . |
| .                  | .                  | .                  | . | .                  | . | .                  | . |
| .                  | .                  | .                  | . | .                  | . | .                  | . |
| Vv06g0644          | Tc09_g031000       | .                  | . | .                  | . | Gorai.004G006200.1 | . |
| Gorai.009G096000.1 | .                  | .                  | . | .                  | . | .                  | . |
| .                  | .                  | .                  | . | .                  | . | .                  | . |
| .                  | .                  | .                  | . | .                  | . | .                  | . |
| Vv06g0645          | .                  | .                  | . | .                  | . | .                  | . |
| .                  | .                  | .                  | . | .                  | . | .                  | . |
| .                  | .                  | .                  | . | .                  | . | .                  | . |
| Vv06g0646          | Tc09_g030990       | .                  | . | Gorai.001G112800.1 | . | .                  | . |
| Gorai.009G095800.1 | Gorai.003G128300.1 | .                  | . | .                  | . | .                  | . |
| .                  | .                  | .                  | . | .                  | . | .                  | . |
| .                  | .                  | .                  | . | .                  | . | .                  | . |
| Vv06g0647          | Tc09_g030980       | .                  | . | Gorai.001G112900.1 | . | .                  | . |
| Gorai.003G128200.1 | .                  | .                  | . | .                  | . | .                  | . |
| .                  | .                  | .                  | . | .                  | . | .                  | . |
| .                  | .                  | .                  | . | .                  | . | .                  | . |
| Vv06g0648          | Tc09_g030970       | .                  | . | Gorai.001G113000.1 | . | .                  | . |
| Gorai.004G006300.1 | Gorai.009G095700.1 | Gorai.003G128100.1 | . | .                  | . | .                  | . |
| .                  | .                  | .                  | . | .                  | . | .                  | . |
| .                  | .                  | .                  | . | .                  | . | .                  | . |
| Vv06g0649          | Tc09_g030960       | Gorai.013G261600.1 | . | .                  | . | .                  | . |
| Gorai.003G127900.1 | .                  | .                  | . | .                  | . | .                  | . |
| .                  | .                  | .                  | . | .                  | . | .                  | . |
| .                  | .                  | .                  | . | .                  | . | .                  | . |
| Vv06g0650          | .                  | .                  | . | .                  | . | .                  | . |
| .                  | .                  | .                  | . | .                  | . | .                  | . |
| .                  | .                  | .                  | . | .                  | . | .                  | . |

|                    |              |                    |                    |   |   |        |   |
|--------------------|--------------|--------------------|--------------------|---|---|--------|---|
| Vv06g0651          | .            | .                  | .                  | . | . | .      | . |
| .                  | .            | .                  | .                  | . | . | .      | . |
| Vv06g0652          | .            | .                  | .                  | . | . | .      | . |
| .                  | .            | .                  | .                  | . | . | .      | . |
| Vv06g0653          | .            | .                  | .                  | . | . | .      | . |
| .                  | .            | .                  | .                  | . | . | .      | . |
| Vv06g0654          | .            | .                  | .                  | . | . | .      | . |
| .                  | .            | .                  | .                  | . | . | .      | . |
| Vv06g0655          | .            | .                  | .                  | . | . | .      | . |
| .                  | .            | .                  | .                  | . | . | .      | . |
| Vv06g0656          | Tc09_g030940 | .                  | .                  | . | . | Gorai. | . |
| 009G095600.1       | .            | .                  | .                  | . | . | .      | . |
| .                  | .            | .                  | .                  | . | . | .      | . |
| Vv06g0657          | .            | .                  | .                  | . | . | .      | . |
| .                  | .            | .                  | .                  | . | . | .      | . |
| Vv06g0658          | Tc09_g030930 | .                  | .                  | . | . | Gorai. | . |
| 009G095500.1       | .            | .                  | .                  | . | . | .      | . |
| .                  | .            | .                  | .                  | . | . | .      | . |
| Vv06g0659          | .            | .                  | .                  | . | . | .      | . |
| .                  | .            | .                  | .                  | . | . | .      | . |
| Vv06g0660          | Tc09_g030910 | .                  | .                  | . | . | .      | . |
| Gorai.003G127800.1 | .            | .                  | .                  | . | . | .      | . |
| .                  | .            | .                  | .                  | . | . | .      | . |
| Vv06g0661          | .            | .                  | Gorai.001G113500.1 | . | . | .      | . |
| .                  | .            | .                  | .                  | . | . | .      | . |
| .                  | .            | .                  | .                  | . | . | .      | . |
| Vv06g0662          | Tc09_g030900 | Gorai.013G179300.1 | .                  | . | . | .      | . |
| .                  | .            | .                  | .                  | . | . | .      | . |
| .                  | .            | .                  | .                  | . | . | .      | . |
| Vv06g0663          | .            | .                  | .                  | . | . | .      | . |
| .                  | .            | .                  | .                  | . | . | .      | . |
| .                  | .            | .                  | .                  | . | . | .      | . |
| Vv06g0664          | Tc09_g030890 | Gorai.013G177600.1 | .                  | . | . | .      | . |
| .                  | .            | .                  | .                  | . | . | .      | . |
| .                  | .            | .                  | .                  | . | . | .      | . |
| Vv06g0665          | .            | Gorai.013G177400.1 | .                  | . | . | .      | . |
| Gorai.003G127600.1 | .            | .                  | .                  | . | . | .      | . |
| .                  | .            | .                  | .                  | . | . | .      | . |
| .                  | .            | .                  | .                  | . | . | .      | . |
| Vv06g0666          | .            | .                  | .                  | . | . | .      | . |
| .                  | .            | .                  | .                  | . | . | .      | . |
| .                  | .            | .                  | .                  | . | . | .      | . |
| Vv06g0667          | Tc09_g030860 | Gorai.013G177300.1 | .                  | . | . | .      | . |

|                    |                    |                    |                    |   |   |
|--------------------|--------------------|--------------------|--------------------|---|---|
| .                  | Gorai.003G127500.1 | .                  | .                  | . | . |
| .                  | .                  | .                  | .                  | . | . |
| .                  | .                  | .                  | .                  | . | . |
| Vv06g0668          | .                  | .                  | .                  | . | . |
| .                  | .                  | .                  | .                  | . | . |
| Vv06g0669          | .                  | .                  | .                  | . | . |
| .                  | .                  | .                  | .                  | . | . |
| Vv06g0670          | .                  | .                  | .                  | . | . |
| .                  | .                  | .                  | .                  | . | . |
| Vv06g0671          | Tc09_g030850       | .                  | .                  | . | . |
| Gorai.003G127400.1 | Vv08g1062          | Tc05_g003500       | .                  | . | . |
| .                  | .                  | .                  | .                  | . | . |
| .                  | .                  | .                  | .                  | . | . |
| Vv06g0672          | .                  | .                  | .                  | . | . |
| .                  | .                  | .                  | .                  | . | . |
| Vv06g0673          | Tc09_g030830       | .                  | Gorai.004G006400.1 | . | . |
| Gorai.009G095200.1 | .                  | .                  | .                  | . | . |
| .                  | .                  | .                  | .                  | . | . |
| Vv06g0674          | Tc09_g030820       | .                  | .                  | . | . |
| Gorai.003G127000.1 | .                  | .                  | .                  | . | . |
| .                  | .                  | .                  | .                  | . | . |
| Vv06g0675          | Tc09_g030810       | .                  | .                  | . | . |
| Gorai.003G126900.1 | Vv08g1066          | Tc05_g003460       | .                  | . | . |
| Gorai.002G259000.1 | .                  | .                  | .                  | . | . |
| .                  | .                  | .                  | .                  | . | . |
| Vv06g0676          | Tc09_g030710       | Gorai.001G114100.1 | .                  | . | . |
| Gorai.004G006500.1 | Gorai.009G095000.1 | .                  | .                  | . | . |
| .                  | .                  | .                  | .                  | . | . |
| .                  | .                  | .                  | .                  | . | . |
| Vv06g0677          | Tc09_g030690       | .                  | .                  | . | . |
| .                  | .                  | .                  | .                  | . | . |
| .                  | .                  | .                  | .                  | . | . |
| Vv06g0678          | .                  | .                  | .                  | . | . |
| .                  | .                  | .                  | .                  | . | . |
| .                  | .                  | .                  | .                  | . | . |
| Vv06g0679          | Tc09_g030660       | .                  | Gorai.             | . | . |
| 009G094900.1       | Gorai.003G126700.1 | Vv08g1068          | .                  | . | . |
| Tc05_g003360       | Gorai.006G179200.1 | .                  | .                  | . | . |
| .                  | .                  | .                  | .                  | . | . |
| Vv06g0680          | Tc09_g030650       | .                  | .                  | . | . |
| Vv08g1070          | Tc05_g003330       | Gorai.006G179400.1 | .                  | . | . |
| Gorai.002G259100.1 | .                  | Gorai.012G109300.1 | Gorai.             | . | . |
| 007G377600.1       | .                  | .                  | .                  | . | . |
| Vv06g0681          | Tc09_g030640       | Gorai.001G114400.1 | .                  | . | . |
| Gorai.009G094800.1 | Gorai.003G126600.1 | .                  | .                  | . | . |

|                    |                    |                    |                    |   |   |   |   |
|--------------------|--------------------|--------------------|--------------------|---|---|---|---|
| .                  | .                  | .                  | .                  | . | . | . | . |
| .                  | .                  | .                  | .                  | . | . | . | . |
| Vv06g0682          | .                  | .                  | .                  | . | . | . | . |
| .                  | .                  | .                  | .                  | . | . | . | . |
| .                  | .                  | .                  | .                  | . | . | . | . |
| Vv06g0683          | Tc09_g030620       | .                  | .                  | . | . | . | . |
| Gorai.003G126400.1 | .                  | .                  | .                  | . | . | . | . |
| .                  | .                  | .                  | .                  | . | . | . | . |
| Vv06g0684          | .                  | .                  | .                  | . | . | . | . |
| Vv08g1072          | Tc05_g003310       | Gorai.006G179600.1 | .                  | . | . | . | . |
| Gorai.012G109400.1 | .                  | .                  | .                  | . | . | . | . |
| .                  | .                  | .                  | .                  | . | . | . | . |
| Vv06g0685          | .                  | .                  | .                  | . | . | . | . |
| Vv08g1076          | Tc05_g003270       | Gorai.002G259300.1 | .                  | . | . | . | . |
| Gorai.002G148300.1 | .                  | Gorai.007G377700.1 | .                  | . | . | . | . |
| .                  | .                  | .                  | .                  | . | . | . | . |
| Vv06g0686          | Tc09_g030610       | Gorai.001G114500.1 | .                  | . | . | . | . |
| .                  | .                  | .                  | .                  | . | . | . | . |
| .                  | .                  | .                  | .                  | . | . | . | . |
| Vv06g0687          | Tc09_g030600       | Gorai.013G261300.1 | .                  | . | . | . | . |
| Gorai.009G094600.1 | Gorai.003G126300.1 | .                  | .                  | . | . | . | . |
| Tc05_g003210       | Gorai.006G179900.1 | .                  | .                  | . | . | . | . |
| .                  | .                  | .                  | .                  | . | . | . | . |
| Vv06g0688          | .                  | .                  | .                  | . | . | . | . |
| .                  | .                  | .                  | .                  | . | . | . | . |
| .                  | .                  | .                  | .                  | . | . | . | . |
| Vv06g0689          | Tc09_g030590       | .                  | .                  | . | . | . | . |
| Gorai.003G125700.1 | .                  | .                  | .                  | . | . | . | . |
| .                  | .                  | .                  | .                  | . | . | . | . |
| Vv06g0690          | .                  | .                  | .                  | . | . | . | . |
| .                  | .                  | .                  | .                  | . | . | . | . |
| .                  | .                  | .                  | .                  | . | . | . | . |
| Vv06g0691          | .                  | .                  | .                  | . | . | . | . |
| .                  | .                  | .                  | .                  | . | . | . | . |
| .                  | .                  | .                  | .                  | . | . | . | . |
| Vv06g0692          | Tc09_g030530       | .                  | .                  | . | . | . | . |
| 009G094400.1       | Gorai.003G125400.1 | Vv08g1093          | Gorai.             | . | . | . | . |
| Tc05_g003130       | Gorai.002G260400.1 | .                  | .                  | . | . | . | . |
| .                  | .                  | .                  | .                  | . | . | . | . |
| Vv06g0693          | Tc09_g030520       | Gorai.013G261200.1 | .                  | . | . | . | . |
| .                  | .                  | .                  | .                  | . | . | . | . |
| .                  | .                  | .                  | .                  | . | . | . | . |
| Vv06g0694          | Tc09_g030510       | .                  | Gorai.004G006600.1 | . | . | . | . |
| .                  | Vv08g1094          | Tc05_g003120       | .                  | . | . | . | . |
| Gorai.002G260500.1 | .                  | .                  | .                  | . | . | . | . |
| .                  | .                  | .                  | .                  | . | . | . | . |
| Vv06g0695          | Tc09_g030500       | Gorai.013G261100.1 | .                  | . | . | . | . |
| .                  | Gorai.003G125300.1 | .                  | .                  | . | . | . | . |
| .                  | .                  | .                  | .                  | . | . | . | . |
| .                  | .                  | .                  | .                  | . | . | . | . |

|                    |                    |                    |                    |   |   |   |   |
|--------------------|--------------------|--------------------|--------------------|---|---|---|---|
| Vv06g0696          | .                  | .                  | .                  | . | . | . | . |
| .                  | .                  | .                  | .                  | . | . | . | . |
| Vv06g0697          | .                  | .                  | .                  | . | . | . | . |
| .                  | .                  | .                  | .                  | . | . | . | . |
| Vv06g0698          | Tc09_g030480       | .                  | Gorai.001G114600.1 | . | . | . | . |
| .                  | .                  | .                  | .                  | . | . | . | . |
| Vv06g0699          | Tc09_g030470       | Gorai.013G175100.1 | .                  | . | . | . | . |
|                    | Gorai.009G094300.1 | .                  | .                  | . | . | . | . |
| .                  | .                  | .                  | .                  | . | . | . | . |
| Vv06g0700          | Tc09_g030460       | .                  | .                  | . | . | . | . |
| Gorai.003G125200.1 | .                  | .                  | .                  | . | . | . | . |
| .                  | .                  | .                  | .                  | . | . | . | . |
| Vv06g0701          | .                  | .                  | .                  | . | . | . | . |
| .                  | .                  | .                  | .                  | . | . | . | . |
| Vv06g0702          | Gorai.013G173100.1 | .                  | .                  | . | . | . | . |
| .                  | .                  | .                  | .                  | . | . | . | . |
| Vv06g0703          | .                  | .                  | .                  | . | . | . | . |
| .                  | .                  | .                  | .                  | . | . | . | . |
| Vv06g0704          | Tc09_g030450       | .                  | .                  | . | . | . | . |
| Gorai.003G125100.1 | .                  | .                  | .                  | . | . | . | . |
| .                  | .                  | .                  | .                  | . | . | . | . |
| Vv06g0705          | .                  | .                  | .                  | . | . | . | . |
| .                  | .                  | .                  | .                  | . | . | . | . |
| Vv06g0706          | Tc09_g030440       | Gorai.013G261000.1 | .                  | . | . | . | . |
| .                  | Gorai.003G125000.1 | .                  | .                  | . | . | . | . |
| .                  | .                  | .                  | .                  | . | . | . | . |
| Vv06g0707          | Tc09_g030430       | Gorai.013G260900.1 | .                  | . | . | . | . |
| .                  | .                  | .                  | .                  | . | . | . | . |
| Vv06g0708          | Tc09_g030420       | Gorai.001G114800.1 | .                  | . | . | . | . |
| .                  | .                  | .                  | .                  | . | . | . | . |
| Vv06g0709          | Tc09_g030410       | .                  | .                  | . | . | . | . |
| Gorai.003G124900.1 | Vv08g1107          | Tc05_g002990       | Gorai.             | . | . | . | . |
| 006G180500.1       | .                  | .                  | .                  | . | . | . | . |
| .                  | .                  | .                  | .                  | . | . | . | . |
| Vv06g0710          | .                  | .                  | Gorai.009G094100.1 | . | . | . | . |
|                    | Gorai.003G124800.1 | .                  | .                  | . | . | . | . |
| .                  | .                  | .                  | .                  | . | . | . | . |
| Vv06g0711          | Tc09_g030390       | Gorai.001G114900.1 | .                  | . | . | . | . |

|                    |                    |                    |                    |           |
|--------------------|--------------------|--------------------|--------------------|-----------|
| .                  | .                  | Vv08g1110          | Tc05_g002950       | .         |
| Gorai.002G261000.1 | .                  | Gorai.012G111800.1 | .                  | Gorai.    |
| 007G378100.1       | .                  | .                  | .                  | .         |
| Vv06g0712          | .                  | .                  | .                  | .         |
| .                  | .                  | .                  | .                  | .         |
| Vv06g0713          | .                  | Gorai.013G260800.1 | .                  | .         |
| .                  | .                  | .                  | .                  | .         |
| Vv06g0714          | Tc09_g030360       | .                  | .                  | Gorai.    |
| 009G093900.1       | .                  | Vv08g1114          | Tc05_g002910       | .         |
| Gorai.002G261400.1 | .                  | .                  | .                  | .         |
| .                  | .                  | .                  | .                  | .         |
| Vv06g0715          | Tc09_g030350       | .                  | .                  | Gorai.    |
| 009G093800.1       | Gorai.003G124600.1 | .                  | .                  | .         |
| .                  | .                  | .                  | .                  | .         |
| .                  | .                  | .                  | .                  | .         |
| Vv06g0716          | Tc09_g030340       | .                  | .                  | Gorai.    |
| 009G093700.1       | .                  | Vv08g1116          | Tc05_g002890       | Gorai.    |
| 006G180900.1       | Gorai.002G261600.1 | .                  | Gorai.012G112000.1 | .         |
| Gorai.007G378300.1 | .                  | .                  | .                  | .         |
| .                  | .                  | .                  | .                  | .         |
| Vv06g0717          | Tc09_g030320       | Gorai.013G260700.1 | .                  | .         |
| Gorai.009G093600.1 | .                  | .                  | .                  | .         |
| .                  | .                  | .                  | .                  | .         |
| .                  | .                  | .                  | .                  | .         |
| Vv06g0718          | Tc09_g030300       | .                  | Gorai.004G006800.1 | .         |
| Gorai.009G093400.1 | .                  | Gorai.003G124500.1 | .                  | .         |
| .                  | .                  | .                  | .                  | .         |
| .                  | .                  | .                  | .                  | .         |
| Vv06g0719          | Tc09_g030290       | .                  | .                  | Gorai.    |
| 009G093300.1       | Gorai.003G124400.1 | .                  | .                  | .         |
| .                  | .                  | .                  | .                  | .         |
| .                  | .                  | .                  | .                  | .         |
| Vv06g0720          | .                  | .                  | .                  | .         |
| .                  | .                  | .                  | .                  | .         |
| .                  | .                  | .                  | .                  | .         |
| Vv06g0721          | Tc09_g030280       | .                  | .                  | .         |
| Gorai.003G124300.1 | .                  | .                  | .                  | .         |
| .                  | .                  | .                  | .                  | .         |
| Vv06g0722          | Tc09_g030270       | .                  | Gorai.004G006900.1 | .         |
| .                  | .                  | .                  | .                  | .         |
| .                  | .                  | .                  | .                  | .         |
| Vv06g0723          | .                  | .                  | .                  | .         |
| .                  | .                  | .                  | .                  | Vv13g0008 |
| .                  | Tc10_g002060       | .                  | .                  | .         |
| Vv06g0724          | Tc09_g030250       | .                  | .                  | Gorai.    |
| 009G093200.1       | .                  | .                  | .                  | .         |
| .                  | .                  | .                  | .                  | .         |
| Vv06g0725          | .                  | .                  | .                  | .         |



|              |                    |                    |
|--------------|--------------------|--------------------|
| Vv06g0726    | Tc09_g030220       | Gorai.001G115100.1 |
|              | Gorai.009G092900.1 | Gorai.003G123900.1 |
| Vv06g0727    | Tc09_g030210       |                    |
|              | Gorai.003G123800.1 |                    |
| Vv06g0728    | Tc09_g030200       | Gorai.001G115200.1 |
|              | Gorai.009G092800.1 |                    |
| Vv06g0729    |                    |                    |
| Vv06g0730    |                    |                    |
| Vv06g0731    |                    |                    |
| Vv08g1118    | Tc05_g002860       | Gorai.002G261700.1 |
|              | Gorai.012G112200.1 |                    |
| Vv06g0732    |                    |                    |
| Vv06g0733    | Tc09_g030190       |                    |
|              | Gorai.003G123700.1 |                    |
| Vv06g0734    | Tc09_g030180       | Gorai.001G115300.1 |
| Vv06g0735    | Tc09_g030170       | Gorai.001G115400.1 |
|              | Gorai.004G007000.1 | Gorai.003G123600.1 |
|              | Gorai.011G283500.1 | Vv13g0017          |
|              |                    | Gorai.010G198700.1 |
| Vv06g0736    | Tc09_g030160       |                    |
|              | Gorai.003G123500.1 |                    |
| Vv06g0737    | Tc09_g030150       |                    |
|              | Gorai.003G123400.1 |                    |
|              | Vv13g0020          | Gorai.013G019000.1 |
|              | Gorai.011G283700.1 | Gorai.012G076000.1 |
| Vv06g0738    | Tc09_g030140       | Gorai.001G115500.1 |
|              | Vv13g0025          | Gorai.             |
| 009G322200.1 |                    |                    |
| Vv06g0739    | Tc09_g030130       |                    |
|              | Gorai.003G123300.1 |                    |

|                           |                                    |                    |              |
|---------------------------|------------------------------------|--------------------|--------------|
| Vv06g0740<br>001G115600.1 | Tc09_g030120                       | Gorai.013G260600.1 | Gorai.       |
| Vv06g0741                 | Gorai.009G322300.1                 | Vv13g0028          | Tc10_g001620 |
| Vv06g0742                 |                                    |                    |              |
| Vv06g0743                 |                                    |                    |              |
| Vv06g0744                 | Tc09_g030100                       |                    |              |
| Vv06g0745                 |                                    |                    |              |
| Vv06g0746                 | Tc09_g030090<br>Gorai.003G123200.1 | Gorai.013G260500.1 |              |
| Vv06g0747                 |                                    |                    |              |
| Vv06g0748<br>009G092600.1 | Tc09_g030080                       |                    | Gorai.       |
| Vv06g0749                 |                                    |                    |              |
| Vv06g0750<br>009G092500.1 | Tc09_g030060                       |                    | Gorai.       |
| Vv06g0751                 |                                    |                    |              |
| Vv06g0752                 |                                    |                    |              |
| Vv06g0753                 |                                    |                    |              |
| Vv06g0754                 |                                    |                    |              |
| Vv06g0755                 |                                    |                    |              |

|                    |                    |                    |   |   |   |        |   |
|--------------------|--------------------|--------------------|---|---|---|--------|---|
| Vv06g0756          | .                  | .                  | . | . | . | .      | . |
| .                  | .                  | .                  | . | . | . | .      | . |
| Vv06g0757          | Tc09_g030040       | .                  | . | . | . | Gorai. | . |
| 009G092400.1       | .                  | .                  | . | . | . | .      | . |
| .                  | .                  | .                  | . | . | . | .      | . |
| Vv06g0758          | Tc09_g030030       | .                  | . | . | . | .      | . |
| Gorai.003G120900.1 | .                  | .                  | . | . | . | .      | . |
| .                  | .                  | .                  | . | . | . | .      | . |
| Vv06g0759          | .                  | .                  | . | . | . | .      | . |
| .                  | .                  | .                  | . | . | . | .      | . |
| .                  | .                  | .                  | . | . | . | .      | . |
| Vv06g0760          | Tc09_g030020       | .                  | . | . | . | .      | . |
| .                  | .                  | .                  | . | . | . | .      | . |
| .                  | .                  | .                  | . | . | . | .      | . |
| Vv06g0761          | Tc09_g030010       | Gorai.013G260400.1 | . | . | . | .      | . |
| Gorai.009G092300.1 | .                  | .                  | . | . | . | .      | . |
| .                  | .                  | .                  | . | . | . | .      | . |
| .                  | .                  | .                  | . | . | . | .      | . |
| Vv06g0762          | Tc09_g030000       | .                  | . | . | . | .      | . |
| Gorai.006G106800.1 | .                  | .                  | . | . | . | .      | . |
| .                  | .                  | .                  | . | . | . | .      | . |
| Vv06g0763          | Gorai.013G260300.1 | .                  | . | . | . | .      | . |
| .                  | .                  | .                  | . | . | . | .      | . |
| .                  | .                  | .                  | . | . | . | .      | . |
| Vv06g0764          | .                  | .                  | . | . | . | .      | . |
| .                  | .                  | .                  | . | . | . | .      | . |
| .                  | .                  | .                  | . | . | . | .      | . |
| Vv06g0765          | Tc09_g029980       | Gorai.001G116000.1 | . | . | . | .      | . |
| .                  | .                  | .                  | . | . | . | .      | . |
| .                  | .                  | .                  | . | . | . | .      | . |
| Vv06g0766          | .                  | .                  | . | . | . | .      | . |
| .                  | .                  | .                  | . | . | . | .      | . |
| .                  | .                  | .                  | . | . | . | .      | . |
| Vv06g0767          | Tc09_g029970       | .                  | . | . | . | .      | . |
| .                  | .                  | .                  | . | . | . | .      | . |
| .                  | .                  | .                  | . | . | . | .      | . |
| Vv06g0768          | Tc09_g029960       | Gorai.004G007100.1 | . | . | . | .      | . |
| Gorai.009G092200.1 | .                  | Vv08g1148          | . | . | . | .      | . |
| Tc05_g002540       | Gorai.006G182300.1 | .                  | . | . | . | Gorai. | . |
| 012G113600.1       | .                  | .                  | . | . | . | .      | . |
| .                  | .                  | .                  | . | . | . | .      | . |
| Vv06g0769          | .                  | .                  | . | . | . | .      | . |
| .                  | .                  | .                  | . | . | . | .      | . |
| .                  | .                  | .                  | . | . | . | .      | . |
| Vv06g0770          | Tc09_g029940       | .                  | . | . | . | .      | . |
| Gorai.006G106700.1 | .                  | .                  | . | . | . | .      | . |
| .                  | .                  | .                  | . | . | . | .      | . |
| .                  | .                  | .                  | . | . | . | .      | . |
| Vv06g0771          | Tc09_g029930       | Gorai.001G116100.1 | . | . | . | .      | . |

|                    |                    |                    |   |   |   |        |   |
|--------------------|--------------------|--------------------|---|---|---|--------|---|
| .                  | .                  | .                  | . | . | . | .      | . |
| .                  | .                  | .                  | . | . | . | .      | . |
| Vv06g0772          | Tc09_g029920       | .                  | . | . | . | Gorai. | . |
| 009G092100.1       | .                  | .                  | . | . | . | .      | . |
| .                  | Vv13g0056          | Tc10_g001550       | . | . | . | Gorai. | . |
| 011G287800.1       | Gorai.010G198100.1 | .                  | . | . | . | .      | . |
| Vv06g0773          | Tc09_g029910       | .                  | . | . | . | .      | . |
| Gorai.006G106600.1 | .                  | .                  | . | . | . | .      | . |
| .                  | Vv13g0057          | Tc10_g001540       | . | . | . | Gorai. | . |
| 011G287900.1       | .                  | .                  | . | . | . | .      | . |
| Vv06g0774          | Tc09_g029900       | .                  | . | . | . | Gorai. | . |
| 009G092000.1       | Vv08g0344          | Tc05_g002480       | . | . | . | .      | . |
| Gorai.002G263500.1 | .                  | .                  | . | . | . | .      | . |
| .                  | .                  | .                  | . | . | . | .      | . |
| Vv06g0775          | Tc09_g029890       | Gorai.001G116200.1 | . | . | . | .      | . |
| .                  | .                  | .                  | . | . | . | .      | . |
| .                  | .                  | .                  | . | . | . | .      | . |
| Vv06g0776          | .                  | .                  | . | . | . | .      | . |
| .                  | .                  | .                  | . | . | . | .      | . |
| .                  | .                  | .                  | . | . | . | .      | . |
| Vv06g0777          | .                  | .                  | . | . | . | .      | . |
| .                  | .                  | .                  | . | . | . | .      | . |
| .                  | .                  | .                  | . | . | . | .      | . |
| Vv06g0778          | .                  | .                  | . | . | . | .      | . |
| .                  | .                  | .                  | . | . | . | .      | . |
| .                  | .                  | .                  | . | . | . | .      | . |
| Vv06g0779          | Tc09_g029880       | .                  | . | . | . | Gorai. | . |
| 009G091700.1       | Gorai.006G106400.1 | .                  | . | . | . | .      | . |
| .                  | Vv13g0058          | Tc10_g001510       | . | . | . | .      | . |
| .                  | Gorai.010G198000.1 | Gorai.012G076900.1 | . | . | . | .      | . |
| Vv06g0780          | Tc09_g029870       | Gorai.             | . | . | . | .      | . |
| 009G091600.1       | Vv08g0345          | .                  | . | . | . | .      | . |
| .                  | .                  | .                  | . | . | . | .      | . |
| .                  | .                  | .                  | . | . | . | .      | . |
| Vv06g0781          | Tc09_g029860       | .                  | . | . | . | Gorai. | . |
| 009G091400.1       | .                  | .                  | . | . | . | .      | . |
| .                  | Vv13g0059          | Tc10_g001480       | . | . | . | Gorai. | . |
| 011G288000.1       | Gorai.010G197900.1 | .                  | . | . | . | .      | . |
| Vv06g0782          | Tc09_g029810       | Gorai.004G007200.1 | . | . | . | .      | . |
| .                  | .                  | .                  | . | . | . | .      | . |
| .                  | .                  | .                  | . | . | . | .      | . |
| Vv06g0783          | .                  | .                  | . | . | . | .      | . |
| .                  | .                  | .                  | . | . | . | .      | . |
| .                  | .                  | .                  | . | . | . | .      | . |
| Vv06g0784          | Tc09_g029790       | .                  | . | . | . | Gorai. | . |
| 009G091300.1       | .                  | .                  | . | . | . | .      | . |
| .                  | Vv13g0065          | Tc10_g001410       | . | . | . | Gorai. | . |
| 011G289100.1       | Gorai.009G322600.1 | .                  | . | . | . | .      | . |
| Vv06g0785          | Tc09_g029780       | Gorai.001G116400.1 | . | . | . | .      | . |
| Gorai.004G007300.1 | Gorai.009G091200.1 | Gorai.006G106300.1 | . | . | . | .      | . |

|                    |                    |                    |        |
|--------------------|--------------------|--------------------|--------|
| Vv13g0068          | Tc10_g001380       | Gorai.013G017600.1 | Gorai. |
| 011G289400.1       | Gorai.010G196500.1 | .                  | .      |
| Vv06g0786          | .                  | .                  | .      |
| .                  | .                  | .                  | .      |
| Vv06g0787          | Tc09_g029760       | .                  | .      |
| .                  | .                  | .                  | .      |
| Vv06g0788          | Tc09_g029750       | Gorai.001G116500.1 | .      |
| .                  | Gorai.006G106100.1 | Vv08g0357          | .      |
| Tc05_g002310       | Gorai.002G262800.1 | .                  | Gorai. |
| 012G115000.1       | Vv13g0073          | Tc10_g001360       | .      |
| Gorai.011G289600.1 | .                  | .                  | .      |
| Vv06g0789          | .                  | .                  | .      |
| .                  | .                  | .                  | .      |
| Vv06g0790          | Tc09_g029740       | .                  | Gorai. |
| 009G091000.1       | Gorai.006G106000.1 | .                  | .      |
| .                  | .                  | .                  | .      |
| Vv06g0791          | Tc09_g029720       | Gorai.001G116600.1 | .      |
| .                  | Gorai.006G105800.1 | .                  | .      |
| .                  | .                  | .                  | .      |
| Vv06g0792          | Tc09_g029710       | Gorai.013G259800.1 | .      |
| .                  | Gorai.006G105700.1 | .                  | .      |
| .                  | .                  | .                  | .      |
| Vv06g0793          | .                  | .                  | .      |
| .                  | .                  | .                  | .      |
| Vv06g0794          | Tc09_g029690       | .                  | Gorai. |
| 009G090900.1       | Gorai.006G105500.1 | .                  | .      |
| .                  | .                  | .                  | .      |
| Vv06g0795          | .                  | .                  | .      |
| .                  | .                  | .                  | .      |
| Vv06g0796          | Tc09_g029670       | .                  | .      |
| Gorai.006G104200.1 | .                  | .                  | .      |
| .                  | .                  | .                  | .      |
| Vv06g0797          | .                  | Gorai.001G116700.1 | .      |
| Gorai.006G101600.1 | .                  | .                  | .      |
| .                  | .                  | .                  | .      |
| Vv06g0798          | Tc09_g029660       | Gorai.001G116900.1 | .      |
| .                  | Gorai.006G105300.1 | Vv08g0368          | .      |
| Tc05_g002230       | .                  | Gorai.012G115400.1 | .      |
| Vv13g0077          | Tc10_g001320       | .                  | .      |

|                    |                    |                    |                    |
|--------------------|--------------------|--------------------|--------------------|
|                    | Gorai.012G077500.1 |                    |                    |
| Vv06g0799          | .                  | Gorai.013G259500.1 | Gorai.001G117000.1 |
| .                  | Gorai.009G090500.1 | .                  | .                  |
| .                  | .                  | .                  | .                  |
| .                  | .                  | .                  | .                  |
| Vv06g0800          | .                  | .                  | .                  |
| .                  | .                  | .                  | .                  |
| .                  | .                  | .                  | .                  |
| Vv06g0801          | .                  | .                  | .                  |
| .                  | .                  | .                  | Vv13g0084          |
|                    | Tc10_g001270       | .                  | Gorai.             |
| 012G077700.1       | .                  | .                  | .                  |
| Vv06g0802          | .                  | Gorai.013G269600.1 | .                  |
| Gorai.009G111600.1 | .                  | Gorai.003G146500.1 | .                  |
| .                  | .                  | .                  | .                  |
| .                  | .                  | .                  | .                  |
| Vv06g0803          | .                  | .                  | .                  |
| .                  | .                  | .                  | .                  |
| .                  | .                  | .                  | .                  |
| Vv06g0804          | .                  | .                  | .                  |
| .                  | .                  | .                  | Vv13g0085          |
|                    | Tc10_g001260       | Gorai.013G017300.1 | Gorai.             |
| 009G322700.1       | Gorai.010G196100.1 | Gorai.012G077900.1 | .                  |
| Vv06g0805          | .                  | .                  | .                  |
| Vv08g0381          | Tc05_g002150       | Gorai.006G183700.1 | Gorai.             |
| 002G262700.1       | .                  | .                  | .                  |
| .                  | .                  | .                  | .                  |
| Vv06g0806          | .                  | Gorai.013G269700.1 | .                  |
| Gorai.009G111700.1 | .                  | Vv08g0382          | Tc05_g002140       |
|                    | Gorai.002G262600.1 | .                  | .                  |
| .                  | .                  | .                  | .                  |
| Vv06g0807          | .                  | .                  | .                  |
| .                  | .                  | .                  | .                  |
| .                  | .                  | .                  | .                  |
| Vv06g0808          | .                  | .                  | .                  |
| Vv08g0386          | Tc05_g002100       | Gorai.006G183900.1 | .                  |
| .                  | .                  | .                  | .                  |
| .                  | .                  | .                  | .                  |
| Vv06g0809          | .                  | .                  | Gorai.             |
| 003G146800.1       | .                  | .                  | .                  |
| .                  | .                  | .                  | .                  |
| Vv06g0810          | .                  | .                  | .                  |
| .                  | .                  | .                  | .                  |
| .                  | .                  | .                  | .                  |
| Vv06g0811          | .                  | .                  | Gorai.             |
| 003G146900.1       | .                  | .                  | .                  |
| .                  | .                  | .                  | .                  |
| Vv06g0812          | .                  | .                  | .                  |
| .                  | .                  | .                  | .                  |
| .                  | .                  | .                  | .                  |

|                    |   |                    |   |                    |                    |        |
|--------------------|---|--------------------|---|--------------------|--------------------|--------|
| Vv06g0813          | . | .                  | . | .                  | .                  | Gorai. |
| 003G147200.1       | . | .                  | . | .                  | .                  | .      |
| Vv13g0092          | . | .                  | . | .                  | .                  | .      |
| Vv06g0814          | . | Gorai.013G269900.1 | . | .                  | .                  | .      |
| Gorai.003G147300.1 | . | .                  | . | .                  | .                  | .      |
| .                  | . | .                  | . | .                  | .                  | .      |
| Vv06g0815          | . | .                  | . | .                  | Gorai.009G111900.1 | .      |
| Vv08g0418          | . | Tc05_g001960       | . | Gorai.006G184200.1 | .                  | .      |
| Gorai.002G265100.1 | . | Gorai.012G117500.1 | . | .                  | .                  | .      |
| .                  | . | .                  | . | .                  | .                  | .      |
| Vv06g0816          | . | .                  | . | .                  | .                  | .      |
| .                  | . | .                  | . | .                  | .                  | .      |
| Vv06g0817          | . | .                  | . | .                  | .                  | .      |
| .                  | . | .                  | . | .                  | .                  | .      |
| Vv06g0818          | . | .                  | . | .                  | .                  | .      |
| .                  | . | .                  | . | .                  | .                  | .      |
| Vv06g0819          | . | Gorai.013G270100.1 | . | .                  | .                  | .      |
| Gorai.003G147500.1 | . | .                  | . | .                  | .                  | .      |
| .                  | . | .                  | . | .                  | .                  | .      |
| Vv06g0820          | . | .                  | . | .                  | .                  | .      |
| .                  | . | .                  | . | .                  | .                  | .      |
| Vv06g0821          | . | .                  | . | .                  | Gorai.009G112300.1 | .      |
| Vv08g0435          | . | Tc05_g001910       | . | Gorai.             | .                  | .      |
| 002G265400.1       | . | Gorai.012G117800.1 | . | Vv13g0101          | .                  | .      |
| Tc10_g001130       | . | .                  | . | .                  | .                  | .      |
| Vv06g0822          | . | .                  | . | Gorai.009G112400.1 | .                  | .      |
| .                  | . | .                  | . | .                  | .                  | .      |
| Vv06g0823          | . | Gorai.013G270200.1 | . | .                  | .                  | .      |
| Gorai.003G147900.1 | . | Vv08g0436          | . | Tc05_g001900       | .                  | .      |
| Gorai.002G265500.1 | . | .                  | . | .                  | .                  | .      |
| .                  | . | .                  | . | .                  | .                  | .      |
| Vv06g0824          | . | .                  | . | .                  | .                  | .      |
| .                  | . | .                  | . | .                  | .                  | .      |
| Vv06g0825          | . | Tc09_g005700       | . | .                  | .                  | .      |
| Gorai.003G148100.1 | . | .                  | . | .                  | .                  | .      |
| .                  | . | .                  | . | .                  | .                  | .      |
| Vv06g0826          | . | Gorai.013G270400.1 | . | .                  | .                  | .      |
| Gorai.003G148200.1 | . | Vv08g0448          | . | .                  | .                  | .      |
| .                  | . | .                  | . | .                  | .                  | .      |
| Vv06g0827          | . | Tc09_g005470       | . | .                  | .                  | .      |
| .                  | . | .                  | . | .                  | .                  | .      |

|                    |                    |                    |   |   |   |                    |   |
|--------------------|--------------------|--------------------|---|---|---|--------------------|---|
| Vv06g0828          | .                  | .                  | . | . | . | .                  | . |
| .                  | .                  | .                  | . | . | . | .                  | . |
| Vv06g0829          | .                  | Gorai.013G270500.1 | . | . | . | .                  | . |
| Gorai.003G148700.1 | .                  | .                  | . | . | . | .                  | . |
| .                  | .                  | .                  | . | . | . | .                  | . |
| Vv06g0830          | .                  | Gorai.013G270700.1 | . | . | . | .                  | . |
| Gorai.009G112600.1 | .                  | Gorai.003G148800.1 | . | . | . | .                  | . |
| .                  | .                  | .                  | . | . | . | .                  | . |
| Vv06g0831          | .                  | .                  | . | . | . | .                  | . |
| .                  | .                  | .                  | . | . | . | Vv13g0116          | . |
| .                  | .                  | .                  | . | . | . | .                  | . |
| Vv06g0832          | .                  | .                  | . | . | . | Gorai.             | . |
| 003G149000.1       | .                  | .                  | . | . | . | .                  | . |
| .                  | .                  | .                  | . | . | . | .                  | . |
| Vv06g0833          | .                  | .                  | . | . | . | .                  | . |
| Vv08g0452          | Tc05_g001810       | Gorai.006G184500.1 | . | . | . | .                  | . |
| Gorai.012G118200.1 | .                  | .                  | . | . | . | .                  | . |
| .                  | .                  | .                  | . | . | . | .                  | . |
| Vv06g0834          | Tc09_g015190       | .                  | . | . | . | .                  | . |
| .                  | .                  | .                  | . | . | . | .                  | . |
| .                  | .                  | .                  | . | . | . | .                  | . |
| Vv06g0835          | .                  | .                  | . | . | . | .                  | . |
| .                  | .                  | .                  | . | . | . | .                  | . |
| .                  | .                  | .                  | . | . | . | .                  | . |
| Vv06g0836          | .                  | .                  | . | . | . | .                  | . |
| .                  | .                  | .                  | . | . | . | .                  | . |
| .                  | .                  | .                  | . | . | . | .                  | . |
| Vv06g0837          | .                  | .                  | . | . | . | .                  | . |
| .                  | .                  | .                  | . | . | . | .                  | . |
| .                  | .                  | .                  | . | . | . | .                  | . |
| Vv06g0838          | .                  | .                  | . | . | . | .                  | . |
| Vv08g0456          | Tc05_g001770       | Gorai.006G184600.1 | . | . | . | Gorai.             | . |
| 002G266000.1       | Gorai.012G118500.1 | .                  | . | . | . | .                  | . |
| .                  | .                  | .                  | . | . | . | .                  | . |
| Vv06g0839          | .                  | .                  | . | . | . | .                  | . |
| Vv08g0457          | Tc05_g001750       | .                  | . | . | . | .                  | . |
| Vv13g0123          | Tc10_g001000       | .                  | . | . | . | Gorai.             | . |
| 009G322800.1       | Gorai.012G079300.1 | .                  | . | . | . | .                  | . |
| Vv06g0840          | .                  | .                  | . | . | . | Gorai.009G112800.1 | . |
| .                  | .                  | .                  | . | . | . | .                  | . |
| .                  | .                  | .                  | . | . | . | .                  | . |
| Vv06g0841          | Tc09_g014960       | .                  | . | . | . | .                  | . |
| .                  | .                  | .                  | . | . | . | .                  | . |
| .                  | .                  | .                  | . | . | . | .                  | . |
| Vv06g0842          | .                  | .                  | . | . | . | .                  | . |
| .                  | .                  | .                  | . | . | . | .                  | . |



|                    |                    |   |   |                    |                    |           |
|--------------------|--------------------|---|---|--------------------|--------------------|-----------|
| Vv06g0843          | .                  | . | . | .                  | .                  | Gorai.    |
| 003G149500.1       | .                  | . | . | .                  | .                  | .         |
| Vv06g0844          | .                  | . | . | .                  | .                  | .         |
|                    | .                  | . | . | .                  | .                  | Vv13g0125 |
| Tc10_g000990       | .                  | . | . | Gorai.011G291500.1 | .                  | .         |
| Gorai.010G195100.1 | .                  | . | . | .                  | .                  | .         |
| Vv06g0845          | .                  | . | . | .                  | Gorai.009G113000.1 | .         |
| .                  | .                  | . | . | .                  | .                  | .         |
| Vv06g0846          | .                  | . | . | .                  | .                  | .         |
| .                  | .                  | . | . | .                  | .                  | .         |
| Vv06g0847          | .                  | . | . | .                  | .                  | .         |
| .                  | .                  | . | . | .                  | .                  | .         |
| Vv06g0848          | .                  | . | . | .                  | .                  | .         |
| .                  | .                  | . | . | .                  | .                  | .         |
| Vv06g0849          | .                  | . | . | .                  | .                  | .         |
| .                  | .                  | . | . | .                  | .                  | .         |
| Vv06g0850          | .                  | . | . | .                  | .                  | .         |
| .                  | .                  | . | . | .                  | .                  | .         |
| Vv06g0851          | .                  | . | . | .                  | .                  | .         |
| .                  | .                  | . | . | .                  | .                  | .         |
| Vv06g0852          | .                  | . | . | .                  | .                  | .         |
| .                  | .                  | . | . | .                  | .                  | .         |
| Vv06g0853          | .                  | . | . | .                  | .                  | .         |
| .                  | .                  | . | . | .                  | .                  | .         |
| Vv06g0854          | .                  | . | . | .                  | .                  | .         |
| .                  | .                  | . | . | .                  | .                  | .         |
| Vv06g0855          | .                  | . | . | .                  | .                  | .         |
| .                  | .                  | . | . | .                  | .                  | .         |
| Vv06g0856          | .                  | . | . | .                  | .                  | .         |
| .                  | .                  | . | . | .                  | .                  | .         |
| Vv06g0857          | .                  | . | . | .                  | .                  | .         |
| .                  | .                  | . | . | .                  | .                  | .         |
| Vv06g0858          | Tc09_g005360       | . | . | Gorai.013G271200.1 | .                  | .         |
|                    | Gorai.009G113200.1 | . | . | Gorai.003G149700.1 | .                  | .         |
| .                  | .                  | . | . | .                  | .                  | .         |

|                    |   |                    |   |   |                    |
|--------------------|---|--------------------|---|---|--------------------|
| Vv06g0859          | . | .                  | . | . | Gorai.009G113300.1 |
| .                  | . | .                  | . | . | .                  |
| Vv06g0860          | . | .                  | . | . | Gorai.             |
| 003G149800.1       | . | .                  | . | . | .                  |
| .                  | . | .                  | . | . | .                  |
| Vv06g0861          | . | .                  | . | . | Gorai.             |
| 003G150000.1       | . | .                  | . | . | .                  |
| .                  | . | .                  | . | . | .                  |
| Vv06g0862          | . | Gorai.013G271300.1 | . | . | .                  |
| .                  | . | .                  | . | . | .                  |
| .                  | . | .                  | . | . | .                  |
| Vv06g0863          | . | .                  | . | . | Gorai.009G113400.1 |
| .                  | . | .                  | . | . | .                  |
| .                  | . | .                  | . | . | .                  |
| Vv06g0864          | . | .                  | . | . | .                  |
| .                  | . | .                  | . | . | .                  |
| .                  | . | .                  | . | . | .                  |
| Vv06g0865          | . | .                  | . | . | .                  |
| .                  | . | .                  | . | . | .                  |
| .                  | . | .                  | . | . | .                  |
| Vv06g0866          | . | .                  | . | . | Gorai.009G113500.1 |
| .                  | . | .                  | . | . | .                  |
| .                  | . | .                  | . | . | .                  |
| Vv06g0867          | . | .                  | . | . | .                  |
| .                  | . | .                  | . | . | .                  |
| .                  | . | .                  | . | . | .                  |
| Vv06g0868          | . | .                  | . | . | Gorai.             |
| 003G150300.1       | . | .                  | . | . | .                  |
| Vv13g0137          | . | .                  | . | . | .                  |
| Vv06g0869          | . | .                  | . | . | .                  |
| .                  | . | .                  | . | . | .                  |
| .                  | . | .                  | . | . | .                  |
| Vv06g0870          | . | .                  | . | . | Gorai.             |
| 003G150400.1       | . | .                  | . | . | .                  |
| .                  | . | .                  | . | . | .                  |
| Vv06g0871          | . | .                  | . | . | .                  |
| .                  | . | .                  | . | . | .                  |
| .                  | . | .                  | . | . | .                  |
| Vv06g0872          | . | .                  | . | . | .                  |
| .                  | . | .                  | . | . | .                  |
| .                  | . | .                  | . | . | .                  |
| Vv06g0873          | . | .                  | . | . | .                  |
| .                  | . | .                  | . | . | .                  |
| .                  | . | .                  | . | . | .                  |
| Vv06g0874          | . | .                  | . | . | Gorai.009G113600.1 |
| Gorai.003G150600.1 | . | .                  | . | . | .                  |
| .                  | . | .                  | . | . | .                  |
| .                  | . | .                  | . | . | .                  |

|                    |              |   |   |                    |                    |   |   |
|--------------------|--------------|---|---|--------------------|--------------------|---|---|
| Vv06g0875          | .            | . | . | .                  | .                  | . | . |
| .                  | .            | . | . | .                  | .                  | . | . |
| .                  | .            | . | . | .                  | .                  | . | . |
| Vv06g0876          | .            | . | . | .                  | .                  | . | . |
| Vv08g0487          | Tc05_g001540 | . | . | .                  | .                  | . | . |
| .                  | .            | . | . | .                  | .                  | . | . |
| Vv06g0877          | .            | . | . | Gorai.004G001100.1 | .                  | . | . |
| .                  | .            | . | . | .                  | .                  | . | . |
| .                  | .            | . | . | .                  | .                  | . | . |
| Vv06g0878          | .            | . | . | .                  | .                  | . | . |
| Vv08g0489          | Tc05_g001510 | . | . | .                  | Gorai.             | . | . |
| 012G119400.1       | .            | . | . | .                  | .                  | . | . |
| .                  | .            | . | . | .                  | .                  | . | . |
| Vv06g0879          | Tc09_g005290 | . | . | .                  | .                  | . | . |
| .                  | .            | . | . | .                  | .                  | . | . |
| .                  | .            | . | . | .                  | .                  | . | . |
| Vv06g0880          | .            | . | . | .                  | Gorai.             | . | . |
| 003G150800.1       | .            | . | . | .                  | .                  | . | . |
| .                  | .            | . | . | .                  | .                  | . | . |
| Vv06g0881          | Tc09_g005210 | . | . | .                  | .                  | . | . |
| Gorai.003G150900.1 | .            | . | . | .                  | .                  | . | . |
| .                  | .            | . | . | .                  | .                  | . | . |
| Vv06g0882          | .            | . | . | .                  | Gorai.009G113700.1 | . | . |
| .                  | .            | . | . | .                  | .                  | . | . |
| .                  | .            | . | . | .                  | .                  | . | . |
| Vv06g0883          | .            | . | . | .                  | .                  | . | . |
| Vv08g0506          | Tc05_g000270 | . | . | Gorai.002G267300.1 | .                  | . | . |
| .                  | .            | . | . | .                  | .                  | . | . |
| .                  | .            | . | . | .                  | .                  | . | . |
| Vv06g0884          | .            | . | . | .                  | .                  | . | . |
| .                  | .            | . | . | .                  | .                  | . | . |
| .                  | .            | . | . | .                  | .                  | . | . |
| Vv06g0885          | .            | . | . | .                  | .                  | . | . |
| .                  | .            | . | . | .                  | .                  | . | . |
| .                  | .            | . | . | .                  | .                  | . | . |
| Vv06g0886          | .            | . | . | .                  | .                  | . | . |
| .                  | .            | . | . | .                  | .                  | . | . |
| .                  | .            | . | . | .                  | .                  | . | . |
| Vv06g0887          | .            | . | . | .                  | Gorai.             | . | . |
| 003G151000.1       | .            | . | . | .                  | .                  | . | . |
| .                  | .            | . | . | .                  | .                  | . | . |
| Vv06g0888          | .            | . | . | .                  | .                  | . | . |
| .                  | .            | . | . | .                  | .                  | . | . |
| .                  | .            | . | . | .                  | .                  | . | . |
| Vv06g0889          | .            | . | . | .                  | .                  | . | . |
| .                  | .            | . | . | .                  | .                  | . | . |
| .                  | .            | . | . | .                  | .                  | . | . |
| Vv06g0890          | .            | . | . | .                  | .                  | . | . |
| .                  | .            | . | . | .                  | .                  | . | . |
| .                  | .            | . | . | .                  | .                  | . | . |

|              |              |   |   |   |                    |        |
|--------------|--------------|---|---|---|--------------------|--------|
| Vv06g0891    | .            | . | . | . | .                  | Gorai. |
| 003G151100.1 | Vv08g0514    | . | . | . | .                  | .      |
| .            | .            | . | . | . | .                  | .      |
| Vv06g0892    | .            | . | . | . | .                  | .      |
| .            | .            | . | . | . | .                  | .      |
| Vv06g0893    | .            | . | . | . | .                  | Gorai. |
| 003G151200.1 | .            | . | . | . | .                  | .      |
| .            | .            | . | . | . | .                  | .      |
| Vv06g0894    | .            | . | . | . | .                  | .      |
| Vv08g0524    | .            | . | . | . | .                  | .      |
| .            | .            | . | . | . | .                  | .      |
| Vv06g0895    | .            | . | . | . | .                  | Gorai. |
| 003G151300.1 | .            | . | . | . | .                  | .      |
| .            | .            | . | . | . | .                  | .      |
| Vv06g0896    | .            | . | . | . | .                  | .      |
| .            | .            | . | . | . | .                  | .      |
| .            | .            | . | . | . | .                  | .      |
| Vv06g0897    | .            | . | . | . | Gorai.009G113800.1 | .      |
| .            | .            | . | . | . | .                  | .      |
| .            | .            | . | . | . | .                  | .      |
| Vv06g0898    | Tc09_g024630 | . | . | . | .                  | .      |
| .            | .            | . | . | . | .                  | .      |
| .            | .            | . | . | . | .                  | .      |
| Vv06g0899    | .            | . | . | . | .                  | .      |
| Vv08g0528    | .            | . | . | . | .                  | .      |
| Vv13g0164    | .            | . | . | . | .                  | .      |
| Vv06g0900    | .            | . | . | . | .                  | Gorai. |
| 003G151400.1 | .            | . | . | . | .                  | .      |
| .            | .            | . | . | . | .                  | .      |
| Vv06g0901    | .            | . | . | . | .                  | .      |
| .            | .            | . | . | . | .                  | .      |
| .            | .            | . | . | . | .                  | .      |
| Vv06g0902    | .            | . | . | . | .                  | Gorai. |
| 003G151500.1 | .            | . | . | . | .                  | .      |
| .            | .            | . | . | . | .                  | .      |
| Vv06g0903    | .            | . | . | . | .                  | .      |
| .            | .            | . | . | . | .                  | .      |
| .            | .            | . | . | . | .                  | .      |
| Vv06g0904    | .            | . | . | . | .                  | .      |
| .            | .            | . | . | . | .                  | .      |
| .            | .            | . | . | . | .                  | .      |
| Vv06g0905    | .            | . | . | . | .                  | Gorai. |
| 003G151600.1 | .            | . | . | . | .                  | .      |
| .            | .            | . | . | . | .                  | .      |
| Vv06g0906    | .            | . | . | . | .                  | .      |
| .            | .            | . | . | . | .                  | .      |
| .            | .            | . | . | . | .                  | .      |
| Vv06g0907    | .            | . | . | . | .                  | .      |
| .            | .            | . | . | . | .                  | .      |

|              |                    |   |   |   |        |   |
|--------------|--------------------|---|---|---|--------|---|
| Vv06g0908    | Tc09_g004920       | . | . | . | .      | . |
| Vv13g0170    | .                  | . | . | . | .      | . |
| Vv06g0909    | Tc09_g024320       | . | . | . | .      | . |
| .            | .                  | . | . | . | .      | . |
| Vv06g0910    | .                  | . | . | . | .      | . |
| .            | .                  | . | . | . | .      | . |
| Vv06g0911    | .                  | . | . | . | .      | . |
| .            | .                  | . | . | . | .      | . |
| Vv06g0912    | .                  | . | . | . | .      | . |
| .            | .                  | . | . | . | .      | . |
| Vv06g0913    | Gorai.013G272400.1 | . | . | . | .      | . |
| .            | .                  | . | . | . | .      | . |
| Vv06g0914    | .                  | . | . | . | .      | . |
| .            | .                  | . | . | . | .      | . |
| Vv06g0915    | .                  | . | . | . | Gorai. | . |
| 003G152200.1 | .                  | . | . | . | .      | . |
| Vv06g0916    | Tc09_g016540       | . | . | . | .      | . |
| .            | .                  | . | . | . | .      | . |
| Vv06g0917    | .                  | . | . | . | .      | . |
| .            | .                  | . | . | . | .      | . |
| Vv06g0918    | .                  | . | . | . | Gorai. | . |
| 003G152400.1 | .                  | . | . | . | .      | . |
| Vv06g0919    | .                  | . | . | . | .      | . |
| .            | .                  | . | . | . | .      | . |
| Vv06g0920    | .                  | . | . | . | .      | . |
| Vv08g0548    | .                  | . | . | . | .      | . |
| Vv06g0921    | Gorai.013G272200.1 | . | . | . | .      | . |
| .            | .                  | . | . | . | .      | . |
| Vv06g0922    | Tc09_g016780       | . | . | . | .      | . |
| .            | .                  | . | . | . | .      | . |
| Vv06g0923    | .                  | . | . | . | .      | . |
| Vv08g0552    | .                  | . | . | . | .      | . |
| Vv13g0187    | .                  | . | . | . | .      | . |
| Vv06g0924    | .                  | . | . | . | .      | . |

|              |                    |                    |                    |        |           |
|--------------|--------------------|--------------------|--------------------|--------|-----------|
| .            | .                  | .                  | .                  | .      | Vv13g0189 |
| .            | Gorai.013G007300.1 | .                  | .                  | .      | .         |
| Vv06g0925    | .                  | .                  | .                  | .      | .         |
| .            | .                  | .                  | .                  | .      | Vv13g0217 |
| .            | Tc10_g016420       | .                  | Gorai.011G207900.1 | .      | .         |
| Vv06g0926    | .                  | .                  | Gorai.004G000900.1 | .      | .         |
| .            | .                  | .                  | .                  | .      | .         |
| Vv06g0927    | .                  | Gorai.013G272000.1 | .                  | .      | .         |
| .            | Vv08g0557          | Tc05_g024960       | .                  | Gorai. | .         |
| 007G266900.1 | .                  | .                  | .                  | .      | .         |
| Vv06g0928    | .                  | .                  | .                  | Gorai. | .         |
| 003G152500.1 | .                  | .                  | .                  | .      | .         |
| Vv06g0929    | .                  | .                  | .                  | .      | .         |
| .            | .                  | .                  | .                  | .      | .         |
| Vv06g0930    | .                  | .                  | .                  | .      | .         |
| .            | .                  | .                  | .                  | .      | .         |
| Vv06g0931    | .                  | .                  | .                  | .      | .         |
| .            | .                  | .                  | .                  | .      | .         |
| Vv06g0932    | .                  | .                  | .                  | .      | .         |
| .            | .                  | .                  | .                  | .      | .         |
| Vv06g0933    | .                  | .                  | .                  | .      | .         |
| .            | .                  | .                  | .                  | .      | .         |
| Vv06g0934    | .                  | .                  | .                  | .      | .         |
| .            | .                  | .                  | .                  | .      | .         |
| Vv06g0935    | .                  | .                  | .                  | .      | .         |
| .            | .                  | .                  | .                  | .      | .         |
| Vv06g0936    | Tc09_g032300       | Gorai.013G271800.1 | .                  | .      | .         |
| .            | .                  | .                  | .                  | .      | .         |
| Vv06g0937    | .                  | .                  | .                  | Gorai. | .         |
| 003G152600.1 | .                  | .                  | .                  | .      | .         |
| Vv06g0938    | .                  | .                  | .                  | .      | .         |
| Vv08g0567    | .                  | .                  | .                  | .      | .         |
| Vv06g0939    | .                  | .                  | .                  | Gorai. | .         |
| 003G152700.1 | .                  | .                  | .                  | .      | .         |
| Vv06g0940    | .                  | .                  | .                  | .      | .         |

|           |              |                    |   |   |   |           |   |
|-----------|--------------|--------------------|---|---|---|-----------|---|
| .         | .            | .                  | . | . | . | .         | . |
| .         | .            | .                  | . | . | . | .         | . |
| Vv06g0941 | Tc09_g024240 | .                  | . | . | . | .         | . |
| .         | .            | .                  | . | . | . | .         | . |
| Vv06g0942 | .            | .                  | . | . | . | .         | . |
| .         | .            | .                  | . | . | . | .         | . |
| Vv06g0943 | .            | .                  | . | . | . | .         | . |
| .         | .            | .                  | . | . | . | .         | . |
|           | Tc10_g016660 | Gorai.013G008700.1 | . | . | . | Vv13g0242 | . |
| .         | .            | .                  | . | . | . | .         | . |
| Vv06g0944 | .            | .                  | . | . | . | .         | . |
| .         | .            | .                  | . | . | . | .         | . |
| Vv06g0945 | .            | .                  | . | . | . | .         | . |
| .         | .            | .                  | . | . | . | .         | . |
| Vv06g0946 | .            | .                  | . | . | . | .         | . |
| .         | .            | .                  | . | . | . | .         | . |
| Vv06g0947 | Tc09_g024080 | .                  | . | . | . | .         | . |
|           | Vv08g0591    | Tc05_g023640       | . | . | . | .         | . |
| .         | .            | .                  | . | . | . | .         | . |
| Vv06g0948 | Tc09_g004910 | .                  | . | . | . | .         | . |
| .         | .            | .                  | . | . | . | .         | . |
| Vv06g0949 | .            | .                  | . | . | . | .         | . |
| .         | .            | .                  | . | . | . | .         | . |
| Vv06g0950 | Tc09_g024050 | .                  | . | . | . | .         | . |
| .         | .            | .                  | . | . | . | .         | . |
| Vv06g0951 | .            | .                  | . | . | . | .         | . |
| .         | .            | .                  | . | . | . | .         | . |
| Vv06g0952 | .            | .                  | . | . | . | .         | . |
| .         | .            | .                  | . | . | . | .         | . |
| Vv06g0953 | .            | Gorai.013G271500.1 | . | . | . | .         | . |
| .         | .            | .                  | . | . | . | .         | . |
| Vv06g0954 | .            | .                  | . | . | . | .         | . |
| .         | .            | .                  | . | . | . | .         | . |
| Vv06g0955 | .            | .                  | . | . | . | .         | . |
| .         | .            | .                  | . | . | . | .         | . |
| Vv06g0956 | .            | .                  | . | . | . | .         | . |
| .         | .            | .                  | . | . | . | .         | . |

|              |              |                    |   |                    |   |        |   |
|--------------|--------------|--------------------|---|--------------------|---|--------|---|
| Vv06g0957    | .            | .                  | . | .                  | . | .      | . |
| .            | .            | .                  | . | .                  | . | .      | . |
| Vv06g0958    | .            | .                  | . | .                  | . | .      | . |
| .            | .            | .                  | . | .                  | . | .      | . |
| Vv06g0959    | .            | Gorai.013G271400.1 | . | .                  | . | .      | . |
| .            | .            | .                  | . | .                  | . | .      | . |
| Vv06g0960    | .            | .                  | . | .                  | . | .      | . |
| .            | .            | .                  | . | .                  | . | .      | . |
| Vv06g0961    | .            | .                  | . | .                  | . | .      | . |
| .            | .            | .                  | . | .                  | . | .      | . |
| Vv06g0962    | .            | .                  | . | .                  | . | .      | . |
| .            | .            | .                  | . | .                  | . | .      | . |
| Vv06g0963    | .            | Gorai.013G268400.1 | . | .                  | . | .      | . |
| .            | .            | .                  | . | .                  | . | .      | . |
| Vv06g0964    | .            | .                  | . | .                  | . | Gorai. | . |
| 003G153200.1 | .            | .                  | . | .                  | . | .      | . |
| .            | .            | .                  | . | .                  | . | .      | . |
| Vv06g0965    | .            | .                  | . | .                  | . | .      | . |
| .            | .            | .                  | . | .                  | . | .      | . |
| Vv06g0966    | Tc09_g032100 | .                  | . | .                  | . | Gorai. | . |
| 009G101200.1 | .            | .                  | . | .                  | . | .      | . |
| .            | .            | .                  | . | .                  | . | .      | . |
| Vv06g0967    | .            | .                  | . | .                  | . | .      | . |
| .            | .            | .                  | . | .                  | . | .      | . |
| Vv06g0968    | .            | .                  | . | .                  | . | .      | . |
| .            | .            | .                  | . | .                  | . | .      | . |
| Vv06g0969    | .            | .                  | . | .                  | . | .      | . |
| .            | .            | .                  | . | .                  | . | .      | . |
| Vv06g0970    | .            | .                  | . | .                  | . | .      | . |
| .            | .            | .                  | . | .                  | . | .      | . |
| Vv06g0971    | .            | .                  | . | .                  | . | .      | . |
| .            | .            | .                  | . | .                  | . | .      | . |
| Vv06g0972    | .            | .                  | . | .                  | . | .      | . |
| .            | .            | .                  | . | .                  | . | .      | . |
| Vv06g0973    | .            | .                  | . | Gorai.004G000800.1 | . | .      | . |



|                           |  |  |  |                    |        |
|---------------------------|--|--|--|--------------------|--------|
| Vv06g0974                 |  |  |  | Gorai.004G000700.1 |        |
| Vv06g0975                 |  |  |  |                    |        |
| Vv06g0976                 |  |  |  |                    |        |
| Vv06g0977<br>003G156000.1 |  |  |  |                    | Gorai. |
| Vv06g0978                 |  |  |  |                    |        |
| Vv06g0979                 |  |  |  |                    |        |
| Vv06g0980                 |  |  |  |                    |        |
| Vv06g0981                 |  |  |  |                    |        |
| Vv06g0982                 |  |  |  |                    |        |
| Vv06g0983                 |  |  |  |                    |        |
| Vv06g0984                 |  |  |  |                    |        |
| Vv06g0985                 |  |  |  |                    |        |
| Vv06g0986                 |  |  |  |                    |        |
| Vv06g0987                 |  |  |  |                    |        |
| Vv06g0988                 |  |  |  |                    |        |
| Vv06g0989                 |  |  |  |                    |        |

|              |                    |   |   |   |   |        |   |
|--------------|--------------------|---|---|---|---|--------|---|
| Vv06g0990    | .                  | . | . | . | . | .      | . |
| .            | .                  | . | . | . | . | .      | . |
| Vv06g0991    | .                  | . | . | . | . | .      | . |
| .            | .                  | . | . | . | . | .      | . |
| Vv06g0992    | .                  | . | . | . | . | .      | . |
| .            | .                  | . | . | . | . | .      | . |
| Vv06g0993    | .                  | . | . | . | . | Gorai. | . |
| 006G116500.1 | .                  | . | . | . | . | .      | . |
| .            | .                  | . | . | . | . | .      | . |
| Vv06g0994    | .                  | . | . | . | . | .      | . |
| .            | .                  | . | . | . | . | .      | . |
| Vv06g0995    | .                  | . | . | . | . | .      | . |
| .            | .                  | . | . | . | . | .      | . |
| Vv06g0996    | Tc09_g031880       | . | . | . | . | Gorai. | . |
| 009G100000.1 | Gorai.006G116400.1 | . | . | . | . | .      | . |
| .            | .                  | . | . | . | . | .      | . |
| Vv06g0997    | .                  | . | . | . | . | .      | . |
| .            | .                  | . | . | . | . | .      | . |
| Vv06g0998    | .                  | . | . | . | . | .      | . |
| .            | .                  | . | . | . | . | .      | . |
| Vv06g0999    | .                  | . | . | . | . | .      | . |
| .            | .                  | . | . | . | . | .      | . |
| Vv06g1000    | .                  | . | . | . | . | .      | . |
| .            | .                  | . | . | . | . | .      | . |
| Vv06g1001    | .                  | . | . | . | . | .      | . |
| .            | .                  | . | . | . | . | .      | . |
| Vv06g1002    | .                  | . | . | . | . | .      | . |
| .            | .                  | . | . | . | . | .      | . |
| Vv06g1003    | .                  | . | . | . | . | .      | . |
| .            | .                  | . | . | . | . | .      | . |
| Vv06g1004    | .                  | . | . | . | . | .      | . |
| .            | .                  | . | . | . | . | .      | . |
| Vv06g1005    | .                  | . | . | . | . | .      | . |
| .            | .                  | . | . | . | . | .      | . |
| Vv06g1006    | .                  | . | . | . | . | .      | . |

|                    |                    |   |   |   |   |        |   |
|--------------------|--------------------|---|---|---|---|--------|---|
| .                  | .                  | . | . | . | . | .      | . |
| .                  | .                  | . | . | . | . | .      | . |
| Vv06g1007          | .                  | . | . | . | . | .      | . |
| .                  | .                  | . | . | . | . | .      | . |
| .                  | .                  | . | . | . | . | .      | . |
| Vv06g1008          | Tc09_g031880       | . | . | . | . | Gorai. | . |
| 009G100000.1       | Gorai.006G116300.1 | . | . | . | . | .      | . |
| .                  | .                  | . | . | . | . | .      | . |
| .                  | .                  | . | . | . | . | .      | . |
| Vv06g1009          | .                  | . | . | . | . | Gorai. | . |
| 006G115600.1       | .                  | . | . | . | . | .      | . |
| .                  | .                  | . | . | . | . | .      | . |
| Vv06g1010          | .                  | . | . | . | . | .      | . |
| .                  | .                  | . | . | . | . | .      | . |
| .                  | .                  | . | . | . | . | .      | . |
| Vv06g1011          | .                  | . | . | . | . | Gorai. | . |
| 006G115500.1       | .                  | . | . | . | . | .      | . |
| .                  | .                  | . | . | . | . | .      | . |
| Vv06g1012          | .                  | . | . | . | . | .      | . |
| .                  | .                  | . | . | . | . | .      | . |
| .                  | .                  | . | . | . | . | .      | . |
| Vv06g1013          | .                  | . | . | . | . | Gorai. | . |
| 006G115400.1       | .                  | . | . | . | . | .      | . |
| .                  | .                  | . | . | . | . | .      | . |
| Vv06g1014          | .                  | . | . | . | . | .      | . |
| .                  | .                  | . | . | . | . | .      | . |
| .                  | .                  | . | . | . | . | .      | . |
| Vv06g1015          | .                  | . | . | . | . | Gorai. | . |
| 006G149200.1       | .                  | . | . | . | . | .      | . |
| .                  | .                  | . | . | . | . | .      | . |
| Vv06g1016          | .                  | . | . | . | . | .      | . |
| .                  | .                  | . | . | . | . | .      | . |
| .                  | .                  | . | . | . | . | .      | . |
| Vv06g1017          | Tc09_g029980       | . | . | . | . | .      | . |
| Gorai.006G113100.1 | .                  | . | . | . | . | .      | . |
| .                  | .                  | . | . | . | . | .      | . |
| Vv06g1018          | .                  | . | . | . | . | .      | . |
| .                  | .                  | . | . | . | . | .      | . |
| .                  | .                  | . | . | . | . | .      | . |
| Vv06g1019          | .                  | . | . | . | . | .      | . |
| .                  | .                  | . | . | . | . | .      | . |
| .                  | .                  | . | . | . | . | .      | . |
| Vv06g1020          | Tc09_g030110       | . | . | . | . | Gorai. | . |
| 009G092700.1       | .                  | . | . | . | . | .      | . |
| .                  | .                  | . | . | . | . | .      | . |
| Vv06g1021          | Tc09_g024620       | . | . | . | . | .      | . |
| .                  | .                  | . | . | . | . | .      | . |
| .                  | .                  | . | . | . | . | .      | . |
| Vv06g1022          | .                  | . | . | . | . | .      | . |
| .                  | .                  | . | . | . | . | .      | . |

|                    |              |   |                    |   |   |   |   |
|--------------------|--------------|---|--------------------|---|---|---|---|
| Vv06g1023          | .            | . | .                  | . | . | . | . |
| .                  | .            | . | .                  | . | . | . | . |
| Vv06g1024          | .            | . | .                  | . | . | . | . |
| .                  | .            | . | .                  | . | . | . | . |
| Vv06g1025          | .            | . | .                  | . | . | . | . |
| .                  | .            | . | .                  | . | . | . | . |
| Vv06g1026          | .            | . | .                  | . | . | . | . |
| .                  | .            | . | .                  | . | . | . | . |
| Vv06g1027          | Tc09_g024930 | . | .                  | . | . | . | . |
| .                  | .            | . | .                  | . | . | . | . |
| Vv06g1028          | .            | . | .                  | . | . | . | . |
| .                  | .            | . | .                  | . | . | . | . |
| Vv06g1029          | .            | . | .                  | . | . | . | . |
| .                  | .            | . | .                  | . | . | . | . |
| Vv06g1030          | .            | . | Gorai.001G125100.1 | . | . | . | . |
| .                  | .            | . | .                  | . | . | . | . |
| Vv06g1031          | .            | . | .                  | . | . | . | . |
| .                  | .            | . | .                  | . | . | . | . |
| Vv06g1032          | Tc09_g024980 | . | .                  | . | . | . | . |
| Gorai.006G124800.1 | .            | . | .                  | . | . | . | . |
| .                  | .            | . | .                  | . | . | . | . |
| Vv06g1033          | .            | . | .                  | . | . | . | . |
| .                  | .            | . | .                  | . | . | . | . |
| Vv06g1034          | .            | . | .                  | . | . | . | . |
| .                  | .            | . | .                  | . | . | . | . |
| Vv06g1035          | .            | . | .                  | . | . | . | . |
| .                  | .            | . | .                  | . | . | . | . |
| Vv06g1036          | .            | . | .                  | . | . | . | . |
| .                  | .            | . | .                  | . | . | . | . |
| Vv06g1037          | .            | . | .                  | . | . | . | . |
| .                  | .            | . | .                  | . | . | . | . |
| Vv06g1038          | .            | . | .                  | . | . | . | . |
| .                  | .            | . | .                  | . | . | . | . |
| Vv06g1039          | .            | . | .                  | . | . | . | . |

|              |              |   |   |   |   |                    |   |
|--------------|--------------|---|---|---|---|--------------------|---|
| .            | .            | . | . | . | . | .                  | . |
| .            | .            | . | . | . | . | .                  | . |
| Vv06g1040    | .            | . | . | . | . | .                  | . |
| .            | .            | . | . | . | . | .                  | . |
| Vv06g1041    | Tc09_g032200 | . | . | . | . | Gorai.             | . |
| 009G101400.1 | .            | . | . | . | . | .                  | . |
| .            | .            | . | . | . | . | .                  | . |
| Vv06g1042    | .            | . | . | . | . | .                  | . |
| .            | .            | . | . | . | . | .                  | . |
| Vv06g1043    | .            | . | . | . | . | Gorai.009G080800.1 | . |
| .            | .            | . | . | . | . | .                  | . |
| Vv06g1044    | .            | . | . | . | . | .                  | . |
| .            | .            | . | . | . | . | .                  | . |
| Vv06g1045    | Tc09_g030320 | . | . | . | . | .                  | . |
| Vv08g0211    | Tc05_g024050 | . | . | . | . | .                  | . |
| .            | .            | . | . | . | . | .                  | . |
| Vv06g1046    | Tc09_g030330 | . | . | . | . | .                  | . |
| Vv08g0210    | Tc05_g024040 | . | . | . | . | .                  | . |
| .            | .            | . | . | . | . | .                  | . |
| Vv06g1047    | .            | . | . | . | . | .                  | . |
| .            | .            | . | . | . | . | .                  | . |
| Vv06g1048    | .            | . | . | . | . | .                  | . |
| .            | .            | . | . | . | . | .                  | . |
| Vv06g1049    | .            | . | . | . | . | .                  | . |
| .            | .            | . | . | . | . | .                  | . |
| Vv06g1050    | .            | . | . | . | . | .                  | . |
| .            | .            | . | . | . | . | .                  | . |
| Vv06g1051    | .            | . | . | . | . | Gorai.009G081100.1 | . |
| .            | .            | . | . | . | . | .                  | . |
| Vv06g1052    | .            | . | . | . | . | .                  | . |
| .            | .            | . | . | . | . | .                  | . |
| Vv06g1053    | .            | . | . | . | . | .                  | . |
| .            | .            | . | . | . | . | .                  | . |
| Vv06g1054    | Tc09_g027360 | . | . | . | . | .                  | . |
| .            | .            | . | . | . | . | .                  | . |
| Vv06g1055    | .            | . | . | . | . | .                  | . |
| .            | .            | . | . | . | . | .                  | . |
| .            | .            | . | . | . | . | .                  | . |

|              |                    |   |   |                    |   |        |   |
|--------------|--------------------|---|---|--------------------|---|--------|---|
| Vv06g1056    | .                  | . | . | .                  | . | .      | . |
| .            | .                  | . | . | .                  | . | .      | . |
| Vv06g1057    | Tc09_g027210       | . | . | Gorai.001G126900.1 | . | .      | . |
| .            | Gorai.006G117500.1 | . | . | .                  | . | .      | . |
| .            | .                  | . | . | .                  | . | .      | . |
| Vv06g1058    | .                  | . | . | .                  | . | .      | . |
| .            | .                  | . | . | .                  | . | .      | . |
| Vv06g1059    | .                  | . | . | .                  | . | .      | . |
| .            | .                  | . | . | .                  | . | .      | . |
| Vv06g1060    | .                  | . | . | .                  | . | .      | . |
| .            | .                  | . | . | .                  | . | .      | . |
| Vv06g1061    | .                  | . | . | .                  | . | .      | . |
| Vv08g0177    | .                  | . | . | .                  | . | .      | . |
| .            | .                  | . | . | .                  | . | .      | . |
| Vv06g1062    | .                  | . | . | .                  | . | .      | . |
| .            | .                  | . | . | .                  | . | .      | . |
| Vv06g1063    | .                  | . | . | .                  | . | .      | . |
| .            | .                  | . | . | .                  | . | .      | . |
| Vv06g1064    | Tc09_g027180       | . | . | Gorai.001G127000.1 | . | .      | . |
| .            | Gorai.006G117800.1 | . | . | .                  | . | .      | . |
| .            | .                  | . | . | .                  | . | .      | . |
| Vv06g1065    | .                  | . | . | .                  | . | Gorai. | . |
| 006G147900.1 | .                  | . | . | .                  | . | .      | . |
| .            | .                  | . | . | .                  | . | .      | . |
| Vv06g1066    | .                  | . | . | .                  | . | .      | . |
| .            | .                  | . | . | .                  | . | .      | . |
| Vv06g1067    | Tc09_g027170       | . | . | .                  | . | .      | . |
| .            | .                  | . | . | .                  | . | .      | . |
| Vv06g1068    | .                  | . | . | .                  | . | .      | . |
| .            | .                  | . | . | .                  | . | .      | . |
| Vv06g1069    | .                  | . | . | .                  | . | .      | . |
| .            | .                  | . | . | .                  | . | .      | . |
| Vv06g1070    | Tc09_g027160       | . | . | Gorai.001G127100.1 | . | .      | . |
| .            | Gorai.009G081400.1 | . | . | .                  | . | .      | . |
| .            | .                  | . | . | .                  | . | .      | . |
| Vv06g1071    | .                  | . | . | .                  | . | .      | . |
| .            | .                  | . | . | .                  | . | .      | . |

|              |              |   |                    |   |                    |        |   |
|--------------|--------------|---|--------------------|---|--------------------|--------|---|
| Vv06g1072    | .            | . | .                  | . | .                  | .      | . |
| .            | .            | . | .                  | . | .                  | .      | . |
| Vv06g1073    | .            | . | .                  | . | .                  | .      | . |
| .            | .            | . | .                  | . | .                  | .      | . |
| Vv06g1074    | .            | . | .                  | . | .                  | Gorai. | . |
| 006G146700.1 | Vv08g0167    | . | Tc05_g005040       | . | .                  | .      | . |
| .            | .            | . | .                  | . | .                  | .      | . |
| Vv06g1075    | .            | . | .                  | . | .                  | .      | . |
| .            | .            | . | .                  | . | .                  | .      | . |
| Vv06g1076    | Tc09_g015990 | . | .                  | . | .                  | .      | . |
| .            | .            | . | .                  | . | .                  | .      | . |
| Vv06g1077    | .            | . | .                  | . | .                  | .      | . |
| .            | .            | . | .                  | . | .                  | .      | . |
| Vv06g1078    | .            | . | .                  | . | .                  | .      | . |
| .            | .            | . | .                  | . | .                  | .      | . |
| Vv06g1079    | .            | . | .                  | . | Gorai.009G081800.1 | .      | . |
| .            | .            | . | .                  | . | .                  | .      | . |
| Vv06g1080    | .            | . | .                  | . | .                  | .      | . |
| .            | .            | . | .                  | . | .                  | .      | . |
| Vv06g1081    | .            | . | .                  | . | .                  | .      | . |
| Vv08g0159    | .            | . | .                  | . | .                  | .      | . |
| .            | .            | . | .                  | . | .                  | .      | . |
| Vv06g1082    | Tc09_g015670 | . | .                  | . | .                  | .      | . |
| .            | .            | . | .                  | . | .                  | .      | . |
| Vv06g1083    | .            | . | .                  | . | .                  | .      | . |
| .            | .            | . | .                  | . | .                  | .      | . |
| Vv06g1084    | .            | . | .                  | . | .                  | .      | . |
| .            | .            | . | .                  | . | .                  | .      | . |
| Vv06g1085    | Tc09_g027130 | . | Gorai.001G127300.1 | . | .                  | .      | . |
| .            | .            | . | .                  | . | .                  | .      | . |
| Vv06g1086    | Tc09_g027120 | . | .                  | . | .                  | .      | . |
| .            | .            | . | .                  | . | .                  | .      | . |
| Vv06g1087    | Tc09_g026980 | . | Gorai.001G128200.1 | . | .                  | .      | . |
| .            | Vv08g0147    | . | .                  | . | .                  | .      | . |
| .            | .            | . | .                  | . | .                  | .      | . |

|              |                    |   |   |   |                    |        |   |
|--------------|--------------------|---|---|---|--------------------|--------|---|
| Vv06g1088    | .                  | . | . | . | .                  | .      | . |
| .            | .                  | . | . | . | .                  | .      | . |
| Vv06g1089    | .                  | . | . | . | .                  | .      | . |
| Vv08g0137    | .                  | . | . | . | .                  | .      | . |
| .            | .                  | . | . | . | .                  | .      | . |
| Vv06g1090    | .                  | . | . | . | .                  | .      | . |
| .            | .                  | . | . | . | .                  | .      | . |
| Vv06g1091    | .                  | . | . | . | .                  | .      | . |
| .            | .                  | . | . | . | .                  | .      | . |
| Vv06g1092    | Tc09_g026940       | . | . | . | .                  | .      | . |
| .            | .                  | . | . | . | .                  | .      | . |
| Vv06g1093    | .                  | . | . | . | .                  | .      | . |
| .            | .                  | . | . | . | .                  | .      | . |
| Vv06g1094    | .                  | . | . | . | .                  | .      | . |
| .            | .                  | . | . | . | .                  | .      | . |
| Vv06g1095    | .                  | . | . | . | .                  | .      | . |
| .            | .                  | . | . | . | .                  | .      | . |
| Vv06g1096    | .                  | . | . | . | .                  | Gorai. | . |
| 006G146500.1 | .                  | . | . | . | .                  | .      | . |
| Vv06g1097    | .                  | . | . | . | .                  | .      | . |
| .            | .                  | . | . | . | .                  | .      | . |
| Vv06g1098    | .                  | . | . | . | .                  | .      | . |
| .            | .                  | . | . | . | .                  | .      | . |
| Vv06g1099    | Gorai.006G144700.1 | . | . | . | Gorai.009G105900.1 | .      | . |
| .            | .                  | . | . | . | .                  | .      | . |
| Vv06g1100    | .                  | . | . | . | .                  | .      | . |
| .            | .                  | . | . | . | .                  | .      | . |
| Vv06g1101    | .                  | . | . | . | .                  | .      | . |
| .            | .                  | . | . | . | .                  | .      | . |
| Vv06g1102    | .                  | . | . | . | .                  | .      | . |
| .            | .                  | . | . | . | .                  | .      | . |
| Vv06g1103    | .                  | . | . | . | .                  | .      | . |
| .            | .                  | . | . | . | .                  | .      | . |
| .            | .                  | . | . | . | .                  | .      | . |



|                    |              |   |   |   |                    |
|--------------------|--------------|---|---|---|--------------------|
| Vv06g1104          | .            | . | . | . | Gorai.009G105600.1 |
| .                  | .            | . | . | . | .                  |
| Vv06g1105          | .            | . | . | . | .                  |
| .                  | .            | . | . | . | .                  |
| Vv06g1106          | .            | . | . | . | Gorai.009G105500.1 |
| Gorai.003G140700.1 | .            | . | . | . | .                  |
| .                  | .            | . | . | . | .                  |
| Vv06g1107          | .            | . | . | . | .                  |
| .                  | .            | . | . | . | .                  |
| Vv06g1108          | Tc09_g030940 | . | . | . | .                  |
| .                  | .            | . | . | . | .                  |
| Vv06g1109          | .            | . | . | . | .                  |
| .                  | .            | . | . | . | .                  |
| Vv06g1110          | .            | . | . | . | .                  |
| .                  | .            | . | . | . | .                  |
| Vv06g1111          | .            | . | . | . | .                  |
| .                  | .            | . | . | . | .                  |
| Vv06g1112          | .            | . | . | . | .                  |
| .                  | .            | . | . | . | .                  |
| Vv06g1113          | .            | . | . | . | .                  |
| .                  | .            | . | . | . | .                  |
| Vv06g1114          | .            | . | . | . | .                  |
| .                  | .            | . | . | . | .                  |
| Vv06g1115          | .            | . | . | . | .                  |
| .                  | .            | . | . | . | .                  |
| Vv06g1116          | .            | . | . | . | .                  |
| .                  | .            | . | . | . | .                  |
| Vv06g1117          | .            | . | . | . | .                  |
| .                  | .            | . | . | . | .                  |
| Vv06g1118          | .            | . | . | . | .                  |
| .                  | .            | . | . | . | .                  |
| Vv06g1119          | .            | . | . | . | .                  |
| .                  | .            | . | . | . | .                  |
| Vv06g1120          | .            | . | . | . | .                  |

|              |                    |  |  |                    |                    |
|--------------|--------------------|--|--|--------------------|--------------------|
| Vv06g1121    |                    |  |  |                    | Gorai.009G105400.1 |
|              | Gorai.003G140600.1 |  |  |                    |                    |
| Vv06g1122    |                    |  |  |                    |                    |
| Vv06g1123    |                    |  |  |                    |                    |
| Vv06g1124    | Tc09_g026760       |  |  |                    |                    |
| Vv06g1125    |                    |  |  |                    |                    |
| Vv06g1126    |                    |  |  |                    |                    |
| Vv06g1127    |                    |  |  |                    |                    |
| Vv06g1128    |                    |  |  |                    |                    |
| Vv06g1129    | Tc09_g031140       |  |  | Gorai.001G129000.1 |                    |
| Vv06g1130    |                    |  |  |                    | Gorai.             |
| 003G140000.1 |                    |  |  |                    |                    |
| Vv06g1131    |                    |  |  |                    |                    |
| Vv06g1132    |                    |  |  |                    |                    |
| Vv06g1133    |                    |  |  |                    |                    |
| Vv06g1134    |                    |  |  |                    |                    |
| Vv06g1135    |                    |  |  |                    |                    |
| Vv06g1136    |                    |  |  |                    |                    |





|                    |                    |                    |  |  |  |  |
|--------------------|--------------------|--------------------|--|--|--|--|
| Vv06g1170          | Tc09_g034700       |                    |  |  |  |  |
| Vv06g1171          |                    |                    |  |  |  |  |
| Vv06g1172          | Gorai.013G266400.1 |                    |  |  |  |  |
| Vv06g1173          | Tc09_g016540       |                    |  |  |  |  |
| Vv06g1174          |                    |                    |  |  |  |  |
| Vv06g1175          | Tc09_g025560       |                    |  |  |  |  |
| Vv06g1176          |                    |                    |  |  |  |  |
| Vv06g1177          |                    |                    |  |  |  |  |
| Vv06g1178          | Tc09_g025520       |                    |  |  |  |  |
| Gorai.006G121600.1 |                    |                    |  |  |  |  |
| Vv06g1179          |                    |                    |  |  |  |  |
| Vv06g1180          |                    |                    |  |  |  |  |
| Vv06g1181          |                    |                    |  |  |  |  |
| Vv06g1182          |                    |                    |  |  |  |  |
| Vv06g1183          |                    |                    |  |  |  |  |
| Vv06g1184          |                    |                    |  |  |  |  |
| Vv06g1185          | Tc09_g025510       | Gorai.001G132100.1 |  |  |  |  |
|                    | Gorai.006G121700.1 |                    |  |  |  |  |

|           |                    |                    |   |        |   |
|-----------|--------------------|--------------------|---|--------|---|
| Vv06g1186 | .                  | Gorai.013G266500.1 | . | .      | . |
| .         | .                  | .                  | . | .      | . |
| Vv06g1187 | .                  | .                  | . | .      | . |
| .         | .                  | .                  | . | .      | . |
| Vv06g1188 | .                  | .                  | . | .      | . |
| .         | .                  | .                  | . | .      | . |
| Vv06g1189 | Tc09_g024980       | Gorai.013G256400.1 | . | .      | . |
|           | Gorai.009G078000.1 | .                  | . | .      | . |
| .         | .                  | .                  | . | .      | . |
| Vv06g1190 | .                  | .                  | . | .      | . |
| .         | .                  | .                  | . | .      | . |
| Vv06g1191 | .                  | Gorai.013G268600.1 | . | .      | . |
| .         | .                  | .                  | . | .      | . |
| Vv06g1192 | Tc09_g016030       | .                  | . | .      | . |
| .         | .                  | .                  | . | .      | . |
| Vv06g1193 | .                  | .                  | . | .      | . |
| .         | .                  | .                  | . | .      | . |
| Vv06g1194 | Tc09_g034550       | .                  | . | .      | . |
| .         | .                  | .                  | . | .      | . |
| Vv06g1195 | .                  | .                  | . | .      | . |
| .         | .                  | .                  | . | .      | . |
| Vv06g1196 | Tc09_g034530       | .                  | . | .      | . |
| .         | .                  | .                  | . | .      | . |
| Vv06g1197 | Tc09_g034520       | .                  | . | .      | . |
| .         | .                  | .                  | . | .      | . |
| Vv06g1198 | .                  | .                  | . | .      | . |
| .         | .                  | .                  | . | .      | . |
| Vv06g1199 | .                  | .                  | . | .      | . |
| .         | .                  | .                  | . | .      | . |
| Vv06g1200 | .                  | Gorai.001G132500.1 | . | .      | . |
| .         | .                  | .                  | . | .      | . |
| Vv06g1201 | .                  | .                  | . | .      | . |
| .         | .                  | .                  | . | .      | . |
| Vv06g1202 | Tc09_g024910       | .                  | . | Gorai. | . |

|                    |                    |                    |                    |   |   |   |   |
|--------------------|--------------------|--------------------|--------------------|---|---|---|---|
| 009G077000.1       | .                  | .                  | .                  | . | . | . | . |
| .                  | .                  | .                  | .                  | . | . | . | . |
| Vv06g1203          | .                  | Gorai.013G254900.1 | .                  | . | . | . | . |
|                    | Gorai.006G122700.1 | .                  | .                  | . | . | . | . |
| .                  | .                  | .                  | .                  | . | . | . | . |
| Vv06g1204          | Tc09_g021220       | .                  | .                  | . | . | . | . |
| .                  | .                  | .                  | .                  | . | . | . | . |
| Vv06g1205          | Tc09_g024820       | .                  | Gorai.001G132800.1 | . | . | . | . |
| .                  | .                  | .                  | .                  | . | . | . | . |
| Vv06g1206          | .                  | .                  | .                  | . | . | . | . |
| .                  | .                  | .                  | .                  | . | . | . | . |
| Vv06g1207          | Tc09_g024810       | .                  | .                  | . | . | . | . |
| Gorai.006G123200.1 | .                  | .                  | .                  | . | . | . | . |
| .                  | .                  | .                  | .                  | . | . | . | . |
| Vv06g1208          | .                  | .                  | .                  | . | . | . | . |
| .                  | .                  | .                  | .                  | . | . | . | . |
| Vv06g1209          | .                  | .                  | .                  | . | . | . | . |
| .                  | .                  | .                  | .                  | . | . | . | . |
| Vv06g1210          | .                  | .                  | .                  | . | . | . | . |
| .                  | .                  | .                  | .                  | . | . | . | . |
| Vv06g1211          | Tc09_g024800       | .                  | Gorai.001G132900.1 | . | . | . | . |
| .                  | .                  | .                  | .                  | . | . | . | . |
| Vv06g1212          | .                  | .                  | .                  | . | . | . | . |
| .                  | .                  | .                  | .                  | . | . | . | . |
| Vv06g1213          | .                  | .                  | .                  | . | . | . | . |
| .                  | .                  | .                  | .                  | . | . | . | . |
| Vv06g1214          | .                  | .                  | .                  | . | . | . | . |
| .                  | .                  | .                  | .                  | . | . | . | . |
| Vv06g1215          | .                  | .                  | .                  | . | . | . | . |
| .                  | .                  | .                  | .                  | . | . | . | . |
| Vv06g1216          | .                  | .                  | .                  | . | . | . | . |
| .                  | .                  | .                  | .                  | . | . | . | . |
| Vv06g1217          | Tc09_g024760       | .                  | .                  | . | . | . | . |
| .                  | .                  | .                  | .                  | . | . | . | . |
| Vv06g1218          | .                  | .                  | .                  | . | . | . | . |
| .                  | .                  | .                  | .                  | . | . | . | . |

|                    |              |                    |  |                    |        |  |
|--------------------|--------------|--------------------|--|--------------------|--------|--|
| Vv06g1219          |              |                    |  |                    |        |  |
| Vv06g1220          | Tc09_g007330 |                    |  |                    |        |  |
| Vv06g1221          |              |                    |  |                    |        |  |
| Vv06g1222          |              | Gorai.013G254300.1 |  |                    |        |  |
| Vv06g1223          |              |                    |  |                    |        |  |
| Vv06g1224          |              |                    |  |                    |        |  |
| Vv06g1225          | Tc09_g024710 |                    |  |                    | Gorai. |  |
| 009G075700.1       |              |                    |  |                    |        |  |
| Vv06g1226          |              |                    |  |                    |        |  |
| Vv06g1227          |              |                    |  |                    |        |  |
| Vv06g1228          | Tc09_g024700 |                    |  | Gorai.001G133000.1 |        |  |
| Vv06g1229          |              |                    |  |                    |        |  |
| Vv06g1230          |              |                    |  |                    |        |  |
| Vv06g1231          |              | Gorai.013G254200.1 |  |                    |        |  |
| Gorai.009G072700.1 |              |                    |  |                    |        |  |
| Vv06g1232          | Tc09_g024690 |                    |  |                    |        |  |
| Gorai.006G123700.1 |              |                    |  |                    |        |  |
| Vv06g1233          | Tc09_g007250 |                    |  |                    |        |  |
| Vv06g1234          |              |                    |  |                    |        |  |



|           |              |   |   |   |   |   |
|-----------|--------------|---|---|---|---|---|
| Vv06g1235 | Tc09_g024630 | . | . | . | . | . |
| .         | .            | . | . | . | . | . |
| Vv06g1236 | .            | . | . | . | . | . |
| .         | .            | . | . | . | . | . |
| Vv06g1237 | Tc09_g034350 | . | . | . | . | . |
| .         | .            | . | . | . | . | . |
| Vv06g1238 | .            | . | . | . | . | . |
| .         | .            | . | . | . | . | . |
| Vv06g1239 | .            | . | . | . | . | . |
| .         | .            | . | . | . | . | . |
| Vv06g1240 | Tc09_g006890 | . | . | . | . | . |
| .         | .            | . | . | . | . | . |
| Vv06g1241 | .            | . | . | . | . | . |
| .         | .            | . | . | . | . | . |
| Vv06g1242 | .            | . | . | . | . | . |
| .         | .            | . | . | . | . | . |
| Vv06g1243 | .            | . | . | . | . | . |
| .         | .            | . | . | . | . | . |
| Vv06g1244 | Tc09_g024260 | . | . | . | . | . |
| .         | .            | . | . | . | . | . |
| Vv06g1245 | .            | . | . | . | . | . |
| .         | .            | . | . | . | . | . |
| Vv06g1246 | .            | . | . | . | . | . |
| .         | .            | . | . | . | . | . |
| Vv06g1247 | .            | . | . | . | . | . |
| .         | .            | . | . | . | . | . |
| Vv06g1248 | .            | . | . | . | . | . |
| .         | .            | . | . | . | . | . |
| Vv06g1249 | .            | . | . | . | . | . |
| .         | .            | . | . | . | . | . |
| Vv06g1250 | .            | . | . | . | . | . |
| .         | .            | . | . | . | . | . |
| Vv06g1251 | .            | . | . | . | . | . |
| .         | .            | . | . | . | . | . |

|           |              |   |   |   |   |   |   |
|-----------|--------------|---|---|---|---|---|---|
| Vv06g1252 | .            | . | . | . | . | . | . |
| .         | .            | . | . | . | . | . | . |
| Vv06g1253 | .            | . | . | . | . | . | . |
| .         | .            | . | . | . | . | . | . |
| Vv06g1254 | .            | . | . | . | . | . | . |
| .         | .            | . | . | . | . | . | . |
| Vv06g1255 | Tc09_g006510 | . | . | . | . | . | . |
| .         | .            | . | . | . | . | . | . |
| Vv06g1256 | .            | . | . | . | . | . | . |
| .         | .            | . | . | . | . | . | . |
| Vv06g1257 | Tc09_g006460 | . | . | . | . | . | . |
| .         | .            | . | . | . | . | . | . |
| Vv06g1258 | .            | . | . | . | . | . | . |
| .         | .            | . | . | . | . | . | . |
| Vv06g1259 | .            | . | . | . | . | . | . |
| .         | .            | . | . | . | . | . | . |
| Vv06g1260 | Tc09_g006360 | . | . | . | . | . | . |
| .         | .            | . | . | . | . | . | . |
| Vv06g1261 | .            | . | . | . | . | . | . |
| .         | .            | . | . | . | . | . | . |
| Vv06g1262 | Tc09_g006190 | . | . | . | . | . | . |
| .         | .            | . | . | . | . | . | . |
| Vv06g1263 | .            | . | . | . | . | . | . |
| .         | .            | . | . | . | . | . | . |
| Vv06g1264 | .            | . | . | . | . | . | . |
| .         | .            | . | . | . | . | . | . |
| Vv06g1265 | Tc09_g006170 | . | . | . | . | . | . |
| .         | .            | . | . | . | . | . | . |
| Vv06g1266 | .            | . | . | . | . | . | . |
| .         | .            | . | . | . | . | . | . |
| Vv06g1267 | .            | . | . | . | . | . | . |
| .         | .            | . | . | . | . | . | . |
| Vv06g1268 | .            | . | . | . | . | . | . |

|              |   |                    |                    |   |   |        |   |
|--------------|---|--------------------|--------------------|---|---|--------|---|
| .            | . | .                  | .                  | . | . | .      | . |
| .            | . | .                  | .                  | . | . | .      | . |
| Vv06g1269    | . | .                  | Gorai.001G135400.1 | . | . | .      | . |
| .            | . | .                  | .                  | . | . | .      | . |
| Vv06g1270    | . | .                  | .                  | . | . | .      | . |
| .            | . | .                  | .                  | . | . | .      | . |
| Vv06g1271    | . | .                  | .                  | . | . | .      | . |
| .            | . | .                  | .                  | . | . | .      | . |
| Vv06g1272    | . | .                  | .                  | . | . | .      | . |
| .            | . | .                  | .                  | . | . | .      | . |
| Vv06g1273    | . | .                  | .                  | . | . | .      | . |
| .            | . | .                  | .                  | . | . | .      | . |
| Vv06g1274    | . | .                  | .                  | . | . | .      | . |
| .            | . | .                  | .                  | . | . | .      | . |
| Vv06g1275    | . | .                  | .                  | . | . | .      | . |
| .            | . | .                  | .                  | . | . | .      | . |
| Vv06g1276    | . | .                  | .                  | . | . | .      | . |
| .            | . | .                  | .                  | . | . | .      | . |
| Vv06g1277    | . | .                  | .                  | . | . | .      | . |
| .            | . | .                  | .                  | . | . | .      | . |
| Vv06g1278    | . | .                  | .                  | . | . | Gorai. | . |
| 006G125000.1 | . | .                  | .                  | . | . | .      | . |
| .            | . | .                  | .                  | . | . | .      | . |
| Vv06g1279    | . | .                  | .                  | . | . | .      | . |
| .            | . | .                  | .                  | . | . | .      | . |
| Vv06g1280    | . | .                  | .                  | . | . | .      | . |
| .            | . | .                  | .                  | . | . | .      | . |
| Vv06g1281    | . | Gorai.013G253200.1 | .                  | . | . | .      | . |
| .            | . | .                  | .                  | . | . | .      | . |
| Vv06g1282    | . | .                  | .                  | . | . | .      | . |
| .            | . | .                  | .                  | . | . | .      | . |
| Vv06g1283    | . | .                  | .                  | . | . | .      | . |
| .            | . | .                  | .                  | . | . | .      | . |
| Vv06g1284    | . | .                  | .                  | . | . | .      | . |
| .            | . | .                  | .                  | . | . | .      | . |
| .            | . | .                  | .                  | . | . | .      | . |

|           |   |   |   |   |   |   |   |
|-----------|---|---|---|---|---|---|---|
| Vv06g1285 | . | . | . | . | . | . | . |
| .         | . | . | . | . | . | . | . |
| Vv06g1286 | . | . | . | . | . | . | . |
| .         | . | . | . | . | . | . | . |
| Vv06g1287 | . | . | . | . | . | . | . |
| .         | . | . | . | . | . | . | . |
| Vv06g1288 | . | . | . | . | . | . | . |
| .         | . | . | . | . | . | . | . |
| Vv06g1289 | . | . | . | . | . | . | . |
| .         | . | . | . | . | . | . | . |
| Vv06g1290 | . | . | . | . | . | . | . |
| .         | . | . | . | . | . | . | . |
| Vv06g1291 | . | . | . | . | . | . | . |
| .         | . | . | . | . | . | . | . |
| Vv06g1292 | . | . | . | . | . | . | . |
| .         | . | . | . | . | . | . | . |
| Vv06g1293 | . | . | . | . | . | . | . |
| .         | . | . | . | . | . | . | . |
| Vv06g1294 | . | . | . | . | . | . | . |
| .         | . | . | . | . | . | . | . |
| Vv06g1295 | . | . | . | . | . | . | . |
| .         | . | . | . | . | . | . | . |
| Vv06g1296 | . | . | . | . | . | . | . |
| .         | . | . | . | . | . | . | . |
| Vv06g1297 | . | . | . | . | . | . | . |
| .         | . | . | . | . | . | . | . |
| Vv06g1298 | . | . | . | . | . | . | . |
| .         | . | . | . | . | . | . | . |
| Vv06g1299 | . | . | . | . | . | . | . |
| .         | . | . | . | . | . | . | . |
| Vv06g1300 | . | . | . | . | . | . | . |
| .         | . | . | . | . | . | . | . |
| Vv06g1301 | . | . | . | . | . | . | . |
| .         | . | . | . | . | . | . | . |

|           |   |                    |   |   |   |   |   |
|-----------|---|--------------------|---|---|---|---|---|
| Vv06g1302 | . | .                  | . | . | . | . | . |
| .         | . | .                  | . | . | . | . | . |
| Vv06g1303 | . | .                  | . | . | . | . | . |
| .         | . | .                  | . | . | . | . | . |
| Vv06g1304 | . | .                  | . | . | . | . | . |
| .         | . | .                  | . | . | . | . | . |
| Vv06g1305 | . | .                  | . | . | . | . | . |
| .         | . | .                  | . | . | . | . | . |
| Vv06g1306 | . | .                  | . | . | . | . | . |
| .         | . | .                  | . | . | . | . | . |
| Vv06g1307 | . | .                  | . | . | . | . | . |
| .         | . | .                  | . | . | . | . | . |
| Vv06g1308 | . | .                  | . | . | . | . | . |
| .         | . | .                  | . | . | . | . | . |
| Vv06g1309 | . | .                  | . | . | . | . | . |
| .         | . | .                  | . | . | . | . | . |
| Vv06g1310 | . | .                  | . | . | . | . | . |
| .         | . | .                  | . | . | . | . | . |
| Vv06g1311 | . | .                  | . | . | . | . | . |
| .         | . | .                  | . | . | . | . | . |
| Vv06g1312 | . | .                  | . | . | . | . | . |
| .         | . | .                  | . | . | . | . | . |
| Vv06g1313 | . | .                  | . | . | . | . | . |
| .         | . | .                  | . | . | . | . | . |
| Vv06g1314 | . | .                  | . | . | . | . | . |
| .         | . | .                  | . | . | . | . | . |
| Vv06g1315 | . | .                  | . | . | . | . | . |
| .         | . | .                  | . | . | . | . | . |
| Vv06g1316 | . | .                  | . | . | . | . | . |
| .         | . | .                  | . | . | . | . | . |
| Vv06g1317 | . | .                  | . | . | . | . | . |
| .         | . | .                  | . | . | . | . | . |
| Vv06g1318 | . | Gorai.013G252300.1 | . | . | . | . | . |

|           |                    |                    |   |   |   |   |
|-----------|--------------------|--------------------|---|---|---|---|
|           | Gorai.006G125500.1 | .                  | . | . | . | . |
| .         | .                  | .                  | . | . | . | . |
| .         | .                  | .                  | . | . | . | . |
| Vv06g1319 | .                  | Gorai.013G249300.1 | . | . | . | . |
| .         | .                  | .                  | . | . | . | . |
| .         | .                  | .                  | . | . | . | . |
| Vv06g1320 | .                  | .                  | . | . | . | . |
| .         | .                  | .                  | . | . | . | . |
| .         | .                  | .                  | . | . | . | . |
| Vv06g1321 | .                  | .                  | . | . | . | . |
| .         | .                  | .                  | . | . | . | . |
| .         | .                  | .                  | . | . | . | . |
| Vv06g1322 | .                  | .                  | . | . | . | . |
| .         | .                  | .                  | . | . | . | . |
| .         | .                  | .                  | . | . | . | . |
| Vv06g1323 | .                  | .                  | . | . | . | . |
| .         | .                  | .                  | . | . | . | . |
| .         | .                  | .                  | . | . | . | . |
| Vv06g1324 | .                  | .                  | . | . | . | . |
| .         | .                  | .                  | . | . | . | . |
| .         | .                  | .                  | . | . | . | . |
| Vv06g1325 | .                  | .                  | . | . | . | . |
| .         | .                  | .                  | . | . | . | . |
| .         | .                  | .                  | . | . | . | . |
| Vv06g1326 | .                  | .                  | . | . | . | . |
| .         | .                  | .                  | . | . | . | . |
| .         | .                  | .                  | . | . | . | . |
| Vv06g1327 | .                  | .                  | . | . | . | . |
| .         | .                  | .                  | . | . | . | . |
| .         | .                  | .                  | . | . | . | . |
| Vv06g1328 | .                  | .                  | . | . | . | . |
| .         | .                  | .                  | . | . | . | . |
| .         | .                  | .                  | . | . | . | . |
| Vv06g1329 | .                  | .                  | . | . | . | . |
| .         | .                  | .                  | . | . | . | . |
| .         | .                  | .                  | . | . | . | . |
| Vv06g1330 | .                  | .                  | . | . | . | . |
| .         | .                  | .                  | . | . | . | . |
| .         | .                  | .                  | . | . | . | . |
| Vv06g1331 | .                  | .                  | . | . | . | . |
| .         | .                  | .                  | . | . | . | . |
| .         | .                  | .                  | . | . | . | . |
| Vv06g1332 | .                  | .                  | . | . | . | . |
| .         | .                  | .                  | . | . | . | . |
| .         | .                  | .                  | . | . | . | . |
| Vv06g1333 | .                  | .                  | . | . | . | . |
| .         | .                  | .                  | . | . | . | . |
| .         | .                  | .                  | . | . | . | . |
| Vv06g1334 | .                  | .                  | . | . | . | . |
| .         | .                  | .                  | . | . | . | . |

|           |   |   |   |   |   |   |   |
|-----------|---|---|---|---|---|---|---|
| Vv06g1335 | . | . | . | . | . | . | . |
| .         | . | . | . | . | . | . | . |
| Vv06g1336 | . | . | . | . | . | . | . |
| .         | . | . | . | . | . | . | . |
| Vv06g1337 | . | . | . | . | . | . | . |
| .         | . | . | . | . | . | . | . |
| Vv06g1338 | . | . | . | . | . | . | . |
| .         | . | . | . | . | . | . | . |
| Vv06g1339 | . | . | . | . | . | . | . |
| .         | . | . | . | . | . | . | . |
| Vv06g1340 | . | . | . | . | . | . | . |
| .         | . | . | . | . | . | . | . |
| Vv06g1341 | . | . | . | . | . | . | . |
| .         | . | . | . | . | . | . | . |
| Vv06g1342 | . | . | . | . | . | . | . |
| .         | . | . | . | . | . | . | . |
| Vv06g1343 | . | . | . | . | . | . | . |
| .         | . | . | . | . | . | . | . |
| Vv06g1344 | . | . | . | . | . | . | . |
| .         | . | . | . | . | . | . | . |
| Vv06g1345 | . | . | . | . | . | . | . |
| .         | . | . | . | . | . | . | . |
| Vv06g1346 | . | . | . | . | . | . | . |
| .         | . | . | . | . | . | . | . |
| Vv06g1347 | . | . | . | . | . | . | . |
| .         | . | . | . | . | . | . | . |
| Vv06g1348 | . | . | . | . | . | . | . |
| .         | . | . | . | . | . | . | . |
| Vv06g1349 | . | . | . | . | . | . | . |
| .         | . | . | . | . | . | . | . |
| Vv06g1350 | . | . | . | . | . | . | . |
| .         | . | . | . | . | . | . | . |
| Vv06g1351 | . | . | . | . | . | . | . |

|           |              |   |   |   |   |   |   |
|-----------|--------------|---|---|---|---|---|---|
| .         | .            | . | . | . | . | . | . |
| Vv06g1352 | .            | . | . | . | . | . | . |
| .         | .            | . | . | . | . | . | . |
| Vv06g1353 | .            | . | . | . | . | . | . |
| .         | .            | . | . | . | . | . | . |
| Vv06g1354 | .            | . | . | . | . | . | . |
| .         | .            | . | . | . | . | . | . |
| Vv06g1355 | .            | . | . | . | . | . | . |
| .         | .            | . | . | . | . | . | . |
| Vv06g1356 | .            | . | . | . | . | . | . |
| .         | .            | . | . | . | . | . | . |
| Vv06g1357 | .            | . | . | . | . | . | . |
| .         | .            | . | . | . | . | . | . |
| Vv06g1358 | .            | . | . | . | . | . | . |
| .         | .            | . | . | . | . | . | . |
| Vv06g1359 | .            | . | . | . | . | . | . |
| .         | .            | . | . | . | . | . | . |
| Vv06g1360 | .            | . | . | . | . | . | . |
| .         | .            | . | . | . | . | . | . |
| Vv06g1361 | .            | . | . | . | . | . | . |
| .         | .            | . | . | . | . | . | . |
| Vv06g1362 | .            | . | . | . | . | . | . |
| .         | .            | . | . | . | . | . | . |
| Vv06g1363 | Tc09_g009260 | . | . | . | . | . | . |
| .         | .            | . | . | . | . | . | . |
| Vv06g1364 | .            | . | . | . | . | . | . |
| .         | .            | . | . | . | . | . | . |
| Vv06g1365 | .            | . | . | . | . | . | . |
| .         | .            | . | . | . | . | . | . |
| Vv06g1366 | .            | . | . | . | . | . | . |
| .         | .            | . | . | . | . | . | . |
| Vv06g1367 | .            | . | . | . | . | . | . |
| .         | .            | . | . | . | . | . | . |
| .         | .            | . | . | . | . | . | . |



|           |                    |   |   |   |   |   |   |
|-----------|--------------------|---|---|---|---|---|---|
| Vv06g1368 | .                  | . | . | . | . | . | . |
| .         | .                  | . | . | . | . | . | . |
| Vv06g1369 | Tc09_g008980       | . | . | . | . | . | . |
| .         | .                  | . | . | . | . | . | . |
| Vv06g1370 | .                  | . | . | . | . | . | . |
| .         | .                  | . | . | . | . | . | . |
| Vv06g1371 | .                  | . | . | . | . | . | . |
| .         | .                  | . | . | . | . | . | . |
| Vv06g1372 | .                  | . | . | . | . | . | . |
| .         | .                  | . | . | . | . | . | . |
| Vv06g1373 | .                  | . | . | . | . | . | . |
| .         | .                  | . | . | . | . | . | . |
| Vv06g1374 | .                  | . | . | . | . | . | . |
| .         | .                  | . | . | . | . | . | . |
| Vv06g1375 | .                  | . | . | . | . | . | . |
| .         | .                  | . | . | . | . | . | . |
| Vv06g1376 | .                  | . | . | . | . | . | . |
| .         | .                  | . | . | . | . | . | . |
| Vv06g1377 | .                  | . | . | . | . | . | . |
| .         | .                  | . | . | . | . | . | . |
| Vv06g1378 | .                  | . | . | . | . | . | . |
| .         | .                  | . | . | . | . | . | . |
| Vv06g1379 | Gorai.013G176100.1 | . | . | . | . | . | . |
| .         | .                  | . | . | . | . | . | . |
| Vv06g1380 | .                  | . | . | . | . | . | . |
| .         | .                  | . | . | . | . | . | . |
| Vv06g1381 | .                  | . | . | . | . | . | . |
| .         | .                  | . | . | . | . | . | . |
| Vv06g1382 | .                  | . | . | . | . | . | . |
| .         | .                  | . | . | . | . | . | . |
| Vv06g1383 | .                  | . | . | . | . | . | . |
| .         | .                  | . | . | . | . | . | . |
| Vv06g1384 | .                  | . | . | . | . | . | . |
| .         | .                  | . | . | . | . | . | . |

|           |              |   |   |   |   |   |   |
|-----------|--------------|---|---|---|---|---|---|
| Vv06g1385 | .            | . | . | . | . | . | . |
| .         | .            | . | . | . | . | . | . |
| Vv06g1386 | .            | . | . | . | . | . | . |
| .         | .            | . | . | . | . | . | . |
| Vv06g1387 | .            | . | . | . | . | . | . |
| .         | .            | . | . | . | . | . | . |
| Vv06g1388 | .            | . | . | . | . | . | . |
| .         | .            | . | . | . | . | . | . |
| Vv06g1389 | .            | . | . | . | . | . | . |
| .         | .            | . | . | . | . | . | . |
| Vv06g1390 | .            | . | . | . | . | . | . |
| .         | .            | . | . | . | . | . | . |
| Vv06g1391 | .            | . | . | . | . | . | . |
| .         | .            | . | . | . | . | . | . |
| Vv06g1392 | .            | . | . | . | . | . | . |
| .         | .            | . | . | . | . | . | . |
| Vv06g1393 | .            | . | . | . | . | . | . |
| .         | .            | . | . | . | . | . | . |
| Vv06g1394 | .            | . | . | . | . | . | . |
| .         | .            | . | . | . | . | . | . |
| Vv06g1395 | .            | . | . | . | . | . | . |
| .         | .            | . | . | . | . | . | . |
| Vv06g1396 | .            | . | . | . | . | . | . |
| .         | .            | . | . | . | . | . | . |
| Vv06g1397 | .            | . | . | . | . | . | . |
| .         | .            | . | . | . | . | . | . |
| Vv06g1398 | Tc09_g031580 | . | . | . | . | . | . |
| .         | .            | . | . | . | . | . | . |
| Vv06g1399 | .            | . | . | . | . | . | . |
| .         | .            | . | . | . | . | . | . |
| Vv06g1400 | .            | . | . | . | . | . | . |
| .         | .            | . | . | . | . | . | . |
| Vv06g1401 | .            | . | . | . | . | . | . |

|           |              |   |   |   |   |   |   |
|-----------|--------------|---|---|---|---|---|---|
| .         | .            | . | . | . | . | . | . |
| Vv06g1402 | .            | . | . | . | . | . | . |
| .         | .            | . | . | . | . | . | . |
| Vv06g1403 | .            | . | . | . | . | . | . |
| .         | .            | . | . | . | . | . | . |
| Vv06g1404 | .            | . | . | . | . | . | . |
| .         | .            | . | . | . | . | . | . |
| Vv06g1405 | .            | . | . | . | . | . | . |
| .         | .            | . | . | . | . | . | . |
| Vv06g1406 | .            | . | . | . | . | . | . |
| .         | .            | . | . | . | . | . | . |
| Vv06g1407 | .            | . | . | . | . | . | . |
| .         | .            | . | . | . | . | . | . |
| Vv06g1408 | .            | . | . | . | . | . | . |
| .         | .            | . | . | . | . | . | . |
| Vv06g1409 | .            | . | . | . | . | . | . |
| .         | .            | . | . | . | . | . | . |
| Vv06g1410 | .            | . | . | . | . | . | . |
| .         | .            | . | . | . | . | . | . |
| Vv06g1411 | Tc09_g021200 | . | . | . | . | . | . |
| .         | .            | . | . | . | . | . | . |
| Vv06g1412 | .            | . | . | . | . | . | . |
| .         | .            | . | . | . | . | . | . |
| Vv06g1413 | .            | . | . | . | . | . | . |
| .         | .            | . | . | . | . | . | . |
| Vv06g1414 | .            | . | . | . | . | . | . |
| .         | .            | . | . | . | . | . | . |
| Vv06g1415 | .            | . | . | . | . | . | . |
| .         | .            | . | . | . | . | . | . |
| Vv06g1416 | .            | . | . | . | . | . | . |
| .         | .            | . | . | . | . | . | . |
| Vv06g1417 | .            | . | . | . | . | . | . |
| .         | .            | . | . | . | . | . | . |
| .         | .            | . | . | . | . | . | . |

|           |              |                    |   |   |   |   |   |
|-----------|--------------|--------------------|---|---|---|---|---|
| Vv06g1418 | .            | .                  | . | . | . | . | . |
| .         | .            | .                  | . | . | . | . | . |
| Vv06g1419 | Tc09_g031420 | .                  | . | . | . | . | . |
| .         | .            | .                  | . | . | . | . | . |
| Vv06g1420 | .            | .                  | . | . | . | . | . |
| .         | .            | .                  | . | . | . | . | . |
| Vv06g1421 | .            | .                  | . | . | . | . | . |
| .         | .            | .                  | . | . | . | . | . |
| Vv06g1422 | .            | .                  | . | . | . | . | . |
| .         | .            | .                  | . | . | . | . | . |
| Vv06g1423 | .            | .                  | . | . | . | . | . |
| .         | .            | .                  | . | . | . | . | . |
| Vv06g1424 | .            | .                  | . | . | . | . | . |
| .         | .            | .                  | . | . | . | . | . |
| Vv06g1425 | Tc09_g021560 | .                  | . | . | . | . | . |
| .         | .            | .                  | . | . | . | . | . |
| Vv06g1426 | Tc09_g031010 | .                  | . | . | . | . | . |
| .         | .            | .                  | . | . | . | . | . |
| Vv06g1427 | .            | .                  | . | . | . | . | . |
| .         | .            | .                  | . | . | . | . | . |
| Vv06g1428 | .            | .                  | . | . | . | . | . |
| .         | .            | .                  | . | . | . | . | . |
| Vv06g1429 | Tc09_g030900 | Gorai.013G177200.1 | . | . | . | . | . |
| .         | .            | .                  | . | . | . | . | . |
| Vv06g1430 | .            | .                  | . | . | . | . | . |
| .         | .            | .                  | . | . | . | . | . |
| Vv06g1431 | .            | .                  | . | . | . | . | . |
| .         | .            | .                  | . | . | . | . | . |
| Vv06g1432 | .            | .                  | . | . | . | . | . |
| .         | .            | .                  | . | . | . | . | . |
| Vv06g1433 | .            | .                  | . | . | . | . | . |
| .         | .            | .                  | . | . | . | . | . |
| Vv06g1434 | .            | .                  | . | . | . | . | . |
| .         | .            | .                  | . | . | . | . | . |

|           |              |  |                    |  |  |  |
|-----------|--------------|--|--------------------|--|--|--|
| Vv06g1435 |              |  |                    |  |  |  |
| Vv06g1436 |              |  |                    |  |  |  |
| Vv06g1437 | Tc09_g030890 |  | Gorai.013G177300.1 |  |  |  |
| Vv06g1438 |              |  |                    |  |  |  |
| Vv06g1439 |              |  |                    |  |  |  |
| Vv06g1440 |              |  |                    |  |  |  |
| Vv06g1441 |              |  |                    |  |  |  |
| Vv06g1442 | Tc09_g003120 |  |                    |  |  |  |
| Vv06g1443 |              |  |                    |  |  |  |
| Vv06g1444 |              |  |                    |  |  |  |
| Vv06g1445 |              |  |                    |  |  |  |
| Vv06g1446 |              |  |                    |  |  |  |
| Vv06g1447 | Tc09_g003150 |  |                    |  |  |  |
| Vv06g1448 |              |  |                    |  |  |  |
| Vv06g1449 | Tc09_g003180 |  |                    |  |  |  |
| Vv06g1450 |              |  |                    |  |  |  |
| Vv06g1451 |              |  |                    |  |  |  |

|           |              |   |   |   |   |   |   |
|-----------|--------------|---|---|---|---|---|---|
| .         | .            | . | . | . | . | . | . |
| Vv06g1452 | .            | . | . | . | . | . | . |
| .         | .            | . | . | . | . | . | . |
| Vv06g1453 | .            | . | . | . | . | . | . |
| .         | .            | . | . | . | . | . | . |
| Vv06g1454 | .            | . | . | . | . | . | . |
| .         | .            | . | . | . | . | . | . |
| Vv06g1455 | .            | . | . | . | . | . | . |
| .         | .            | . | . | . | . | . | . |
| Vv06g1456 | .            | . | . | . | . | . | . |
| .         | .            | . | . | . | . | . | . |
| Vv06g1457 | .            | . | . | . | . | . | . |
| .         | .            | . | . | . | . | . | . |
| Vv06g1458 | .            | . | . | . | . | . | . |
| .         | .            | . | . | . | . | . | . |
| Vv06g1459 | .            | . | . | . | . | . | . |
| .         | .            | . | . | . | . | . | . |
| Vv06g1460 | Tc09_g021750 | . | . | . | . | . | . |
| .         | .            | . | . | . | . | . | . |
| Vv06g1461 | .            | . | . | . | . | . | . |
| .         | .            | . | . | . | . | . | . |
| Vv06g1462 | .            | . | . | . | . | . | . |
| .         | .            | . | . | . | . | . | . |
| Vv06g1463 | .            | . | . | . | . | . | . |
| .         | .            | . | . | . | . | . | . |
| Vv06g1464 | .            | . | . | . | . | . | . |
| .         | .            | . | . | . | . | . | . |
| Vv06g1465 | .            | . | . | . | . | . | . |
| .         | .            | . | . | . | . | . | . |
| Vv06g1466 | .            | . | . | . | . | . | . |
| .         | .            | . | . | . | . | . | . |
| Vv06g1467 | .            | . | . | . | . | . | . |
| .         | .            | . | . | . | . | . | . |
| .         | .            | . | . | . | . | . | . |

|           |                    |   |   |   |   |   |   |
|-----------|--------------------|---|---|---|---|---|---|
| Vv06g1468 | .                  | . | . | . | . | . | . |
| .         | .                  | . | . | . | . | . | . |
| Vv06g1469 | .                  | . | . | . | . | . | . |
| .         | .                  | . | . | . | . | . | . |
| Vv06g1470 | .                  | . | . | . | . | . | . |
| .         | .                  | . | . | . | . | . | . |
| Vv06g1471 | .                  | . | . | . | . | . | . |
| .         | .                  | . | . | . | . | . | . |
| Vv06g1472 | .                  | . | . | . | . | . | . |
| .         | .                  | . | . | . | . | . | . |
| Vv06g1473 | .                  | . | . | . | . | . | . |
| .         | .                  | . | . | . | . | . | . |
| Vv06g1474 | .                  | . | . | . | . | . | . |
| .         | .                  | . | . | . | . | . | . |
| Vv06g1475 | .                  | . | . | . | . | . | . |
| .         | .                  | . | . | . | . | . | . |
| Vv06g1476 | .                  | . | . | . | . | . | . |
| .         | .                  | . | . | . | . | . | . |
| Vv06g1477 | .                  | . | . | . | . | . | . |
| .         | .                  | . | . | . | . | . | . |
| Vv06g1478 | .                  | . | . | . | . | . | . |
| .         | .                  | . | . | . | . | . | . |
| Vv06g1479 | .                  | . | . | . | . | . | . |
| .         | .                  | . | . | . | . | . | . |
| Vv06g1480 | Tc09_g003520       | . | . | . | . | . | . |
| .         | .                  | . | . | . | . | . | . |
| Vv06g1481 | Gorai.013G177400.1 | . | . | . | . | . | . |
| .         | .                  | . | . | . | . | . | . |
| Vv06g1482 | .                  | . | . | . | . | . | . |
| .         | .                  | . | . | . | . | . | . |
| Vv06g1483 | .                  | . | . | . | . | . | . |
| .         | .                  | . | . | . | . | . | . |
| Vv06g1484 | .                  | . | . | . | . | . | . |
| .         | .                  | . | . | . | . | . | . |

|           |              |                    |   |   |   |   |   |
|-----------|--------------|--------------------|---|---|---|---|---|
| Vv06g1485 | .            | .                  | . | . | . | . | . |
| .         | .            | .                  | . | . | . | . | . |
| Vv06g1486 | .            | .                  | . | . | . | . | . |
| .         | .            | .                  | . | . | . | . | . |
| Vv06g1487 | .            | .                  | . | . | . | . | . |
| .         | .            | .                  | . | . | . | . | . |
| Vv06g1488 | .            | Gorai.013G177600.1 | . | . | . | . | . |
| .         | .            | .                  | . | . | . | . | . |
| Vv06g1489 | .            | .                  | . | . | . | . | . |
| .         | .            | .                  | . | . | . | . | . |
| Vv06g1490 | .            | .                  | . | . | . | . | . |
| .         | .            | .                  | . | . | . | . | . |
| Vv06g1491 | .            | .                  | . | . | . | . | . |
| .         | .            | .                  | . | . | . | . | . |
| Vv06g1492 | .            | .                  | . | . | . | . | . |
| .         | .            | .                  | . | . | . | . | . |
| Vv06g1493 | .            | .                  | . | . | . | . | . |
| .         | .            | .                  | . | . | . | . | . |
| Vv06g1494 | .            | .                  | . | . | . | . | . |
| .         | .            | .                  | . | . | . | . | . |
| Vv06g1495 | .            | .                  | . | . | . | . | . |
| .         | .            | .                  | . | . | . | . | . |
| Vv06g1496 | .            | .                  | . | . | . | . | . |
| .         | .            | .                  | . | . | . | . | . |
| Vv06g1497 | .            | .                  | . | . | . | . | . |
| .         | .            | .                  | . | . | . | . | . |
| Vv06g1498 | .            | .                  | . | . | . | . | . |
| .         | .            | .                  | . | . | . | . | . |
| Vv06g1499 | .            | .                  | . | . | . | . | . |
| .         | .            | .                  | . | . | . | . | . |
| Vv06g1500 | .            | .                  | . | . | . | . | . |
| .         | .            | .                  | . | . | . | . | . |
| Vv06g1501 | Tc09_g035230 | .                  | . | . | . | . | . |



|           |              |   |   |   |   |   |   |
|-----------|--------------|---|---|---|---|---|---|
| .         | .            | . | . | . | . | . | . |
| Vv06g1502 | .            | . | . | . | . | . | . |
| .         | .            | . | . | . | . | . | . |
| Vv06g1503 | .            | . | . | . | . | . | . |
| .         | .            | . | . | . | . | . | . |
| Vv06g1504 | .            | . | . | . | . | . | . |
| .         | .            | . | . | . | . | . | . |
| Vv06g1505 | .            | . | . | . | . | . | . |
| .         | .            | . | . | . | . | . | . |
| Vv06g1506 | .            | . | . | . | . | . | . |
| .         | .            | . | . | . | . | . | . |
| Vv06g1507 | .            | . | . | . | . | . | . |
| .         | .            | . | . | . | . | . | . |
| Vv06g1508 | .            | . | . | . | . | . | . |
| .         | .            | . | . | . | . | . | . |
| Vv06g1509 | .            | . | . | . | . | . | . |
| .         | .            | . | . | . | . | . | . |
| Vv06g1510 | .            | . | . | . | . | . | . |
| .         | .            | . | . | . | . | . | . |
| Vv06g1511 | .            | . | . | . | . | . | . |
| .         | .            | . | . | . | . | . | . |
| Vv06g1512 | Tc09_g035200 | . | . | . | . | . | . |
| .         | .            | . | . | . | . | . | . |
| Vv06g1513 | .            | . | . | . | . | . | . |
| .         | .            | . | . | . | . | . | . |
| Vv06g1514 | .            | . | . | . | . | . | . |
| .         | .            | . | . | . | . | . | . |
| Vv06g1515 | .            | . | . | . | . | . | . |
| .         | .            | . | . | . | . | . | . |
| Vv06g1516 | .            | . | . | . | . | . | . |
| .         | .            | . | . | . | . | . | . |
| Vv06g1517 | .            | . | . | . | . | . | . |
| .         | .            | . | . | . | . | . | . |
| .         | .            | . | . | . | . | . | . |

|                    |                    |                    |                    |   |   |        |   |
|--------------------|--------------------|--------------------|--------------------|---|---|--------|---|
| Vv06g1518          | .                  | .                  | .                  | . | . | .      | . |
| .                  | .                  | .                  | .                  | . | . | .      | . |
| Vv06g1519          | .                  | .                  | .                  | . | . | .      | . |
| .                  | .                  | .                  | .                  | . | . | .      | . |
| Vv06g1520          | .                  | .                  | .                  | . | . | .      | . |
| .                  | .                  | .                  | .                  | . | . | .      | . |
| Vv06g1521          | .                  | .                  | .                  | . | . | .      | . |
| .                  | .                  | .                  | .                  | . | . | .      | . |
| Vv06g1522          | Tc09_g024300       | Gorai.013G253300.1 | .                  | . | . | .      | . |
| .                  | Gorai.006G124500.1 | .                  | .                  | . | . | .      | . |
| .                  | .                  | .                  | .                  | . | . | .      | . |
| Vv06g1523          | .                  | .                  | .                  | . | . | .      | . |
| .                  | .                  | .                  | .                  | . | . | .      | . |
| Vv06g1524          | Tc09_g024320       | Gorai.013G253400.1 | .                  | . | . | .      | . |
| .                  | .                  | .                  | .                  | . | . | .      | . |
| Vv06g1525          | Tc09_g024330       | .                  | .                  | . | . | Gorai. | . |
| 009G077200.1       | .                  | .                  | .                  | . | . | .      | . |
| .                  | .                  | .                  | .                  | . | . | .      | . |
| Vv06g1526          | Tc09_g024350       | .                  | Gorai.001G133600.1 | . | . | .      | . |
| .                  | .                  | .                  | .                  | . | . | .      | . |
| Vv06g1527          | .                  | Gorai.013G253200.1 | .                  | . | . | .      | . |
| .                  | .                  | .                  | .                  | . | . | .      | . |
| Vv06g1528          | .                  | .                  | .                  | . | . | .      | . |
| .                  | .                  | .                  | .                  | . | . | .      | . |
| Vv06g1529          | .                  | .                  | .                  | . | . | .      | . |
| .                  | .                  | .                  | .                  | . | . | .      | . |
| Vv06g1530          | Tc09_g024370       | .                  | .                  | . | . | .      | . |
| .                  | .                  | .                  | .                  | . | . | .      | . |
| Vv06g1531          | .                  | .                  | Gorai.001G133700.1 | . | . | .      | . |
| Gorai.009G074900.1 | Gorai.006G124400.1 | .                  | .                  | . | . | .      | . |
| .                  | .                  | .                  | .                  | . | . | .      | . |
| Vv06g1532          | .                  | .                  | .                  | . | . | .      | . |
| .                  | .                  | .                  | .                  | . | . | .      | . |
| Vv06g1533          | Tc09_g024380       | .                  | Gorai.001G133800.1 | . | . | .      | . |
| .                  | .                  | .                  | .                  | . | . | .      | . |
| .                  | .                  | .                  | .                  | . | . | .      | . |

|                    |                    |   |                    |   |        |
|--------------------|--------------------|---|--------------------|---|--------|
| Vv06g1534          | Tc09_g024390       | . | .                  | . | .      |
| Gorai.006G124300.1 | .                  | . | .                  | . | .      |
| .                  | .                  | . | .                  | . | .      |
| Vv06g1535          | .                  | . | .                  | . | .      |
| .                  | .                  | . | .                  | . | .      |
| .                  | .                  | . | .                  | . | .      |
| Vv06g1536          | Tc09_g024410       | . | .                  | . | .      |
| .                  | .                  | . | .                  | . | .      |
| .                  | .                  | . | .                  | . | .      |
| Vv06g1537          | .                  | . | .                  | . | .      |
| .                  | .                  | . | .                  | . | .      |
| .                  | .                  | . | .                  | . | .      |
| Vv06g1538          | Tc09_g024510       | . | .                  | . | Gorai. |
| 009G075200.1       | .                  | . | .                  | . | .      |
| .                  | .                  | . | .                  | . | .      |
| Vv06g1539          | Tc09_g024520       | . | .                  | . | .      |
| Gorai.006G124000.1 | .                  | . | .                  | . | .      |
| .                  | .                  | . | .                  | . | .      |
| Vv06g1540          | Tc09_g024530       | . | Gorai.001G134000.1 | . | .      |
| .                  | .                  | . | .                  | . | .      |
| .                  | .                  | . | .                  | . | .      |
| Vv06g1541          | Tc09_g024540       | . | Gorai.001G134100.1 | . | .      |
| Gorai.009G075300.1 | Gorai.006G123900.1 | . | .                  | . | .      |
| .                  | .                  | . | .                  | . | .      |
| .                  | .                  | . | .                  | . | .      |
| Vv06g1542          | .                  | . | .                  | . | .      |
| .                  | .                  | . | .                  | . | .      |
| .                  | .                  | . | .                  | . | .      |
| Vv06g1543          | Tc09_g024560       | . | Gorai.001G134300.1 | . | .      |
| Gorai.009G075400.1 | .                  | . | .                  | . | .      |
| .                  | .                  | . | .                  | . | .      |
| .                  | .                  | . | .                  | . | .      |
| Vv06g1544          | Tc09_g024570       | . | .                  | . | .      |
| .                  | .                  | . | .                  | . | .      |
| .                  | .                  | . | .                  | . | .      |
| Vv06g1545          | .                  | . | .                  | . | .      |
| .                  | .                  | . | .                  | . | .      |
| .                  | .                  | . | .                  | . | .      |
| Vv06g1546          | Tc09_g024580       | . | Gorai.001G134600.1 | . | .      |
| Gorai.009G075500.1 | .                  | . | .                  | . | .      |
| .                  | .                  | . | .                  | . | .      |
| .                  | .                  | . | .                  | . | .      |
| Vv06g1547          | Tc09_g024590       | . | Gorai.001G134800.1 | . | .      |
| .                  | .                  | . | .                  | . | .      |
| .                  | .                  | . | .                  | . | .      |
| Vv06g1548          | Tc09_g024610       | . | .                  | . | .      |
| Gorai.006G123800.1 | .                  | . | .                  | . | .      |
| .                  | .                  | . | .                  | . | .      |
| Vv06g1549          | Tc09_g024630       | . | .                  | . | .      |
| .                  | .                  | . | .                  | . | .      |

|                    |                    |                    |   |                    |                    |        |   |
|--------------------|--------------------|--------------------|---|--------------------|--------------------|--------|---|
| Vv06g1550          | .                  | .                  | . | .                  | .                  | .      | . |
| .                  | .                  | .                  | . | .                  | .                  | .      | . |
| Vv06g1551          | Tc09_g003120       | .                  | . | .                  | .                  | .      | . |
| .                  | .                  | .                  | . | .                  | .                  | .      | . |
| Vv06g1552          | .                  | .                  | . | .                  | Gorai.009G075600.1 | .      | . |
| .                  | .                  | .                  | . | .                  | .                  | .      | . |
| Vv06g1553          | .                  | .                  | . | .                  | .                  | .      | . |
| .                  | .                  | .                  | . | .                  | .                  | .      | . |
| Vv06g1554          | Tc09_g024840       | .                  | . | .                  | .                  | .      | . |
| .                  | .                  | .                  | . | .                  | .                  | .      | . |
| Vv06g1555          | Tc09_g025170       | .                  | . | .                  | .                  | Gorai. | . |
| 009G077400.1       | Gorai.006G120900.1 | .                  | . | .                  | .                  | .      | . |
| .                  | .                  | .                  | . | .                  | .                  | .      | . |
| Vv06g1556          | Tc09_g025230       | .                  | . | Gorai.001G135700.1 | .                  | .      | . |
| .                  | .                  | .                  | . | .                  | .                  | .      | . |
| Vv06g1557          | .                  | Gorai.013G252800.1 | . | .                  | .                  | .      | . |
| Gorai.006G133200.1 | .                  | .                  | . | .                  | .                  | .      | . |
| .                  | .                  | .                  | . | .                  | .                  | .      | . |
| Vv06g1558          | .                  | .                  | . | .                  | .                  | .      | . |
| .                  | .                  | .                  | . | .                  | .                  | .      | . |
| Vv06g1559          | .                  | .                  | . | .                  | .                  | Gorai. | . |
| 006G125400.1       | .                  | .                  | . | .                  | .                  | .      | . |
| .                  | .                  | .                  | . | .                  | .                  | .      | . |
| Vv06g1560          | .                  | .                  | . | .                  | .                  | .      | . |
| .                  | .                  | .                  | . | .                  | .                  | .      | . |
| Vv06g1561          | .                  | .                  | . | .                  | .                  | .      | . |
| .                  | .                  | .                  | . | .                  | .                  | .      | . |
| Vv06g1562          | .                  | .                  | . | .                  | .                  | .      | . |
| .                  | .                  | .                  | . | .                  | .                  | .      | . |
| Vv06g1563          | .                  | .                  | . | .                  | Gorai.009G074800.1 | .      | . |
| .                  | .                  | .                  | . | .                  | .                  | .      | . |
| Vv06g1564          | .                  | .                  | . | .                  | Gorai.009G108800.1 | .      | . |
| Gorai.006G125500.1 | .                  | .                  | . | .                  | .                  | .      | . |
| .                  | .                  | .                  | . | .                  | .                  | .      | . |
| Vv06g1565          | Tc09_g003380       | .                  | . | .                  | .                  | .      | . |

|                    |              |                    |                    |   |   |                    |   |
|--------------------|--------------|--------------------|--------------------|---|---|--------------------|---|
| .                  | .            | .                  | .                  | . | . | .                  | . |
| .                  | .            | .                  | .                  | . | . | .                  | . |
| Vv06g1566          | .            | Gorai.013G252400.1 | .                  | . | . | .                  | . |
| .                  | .            | .                  | .                  | . | . | .                  | . |
| .                  | .            | .                  | .                  | . | . | .                  | . |
| Vv06g1567          | .            | .                  | .                  | . | . | Gorai.             | . |
| 006G125600.1       | .            | .                  | .                  | . | . | .                  | . |
| .                  | .            | .                  | .                  | . | . | .                  | . |
| Vv06g1568          | .            | Gorai.001G136400.1 | .                  | . | . | .                  | . |
| .                  | .            | .                  | .                  | . | . | .                  | . |
| .                  | .            | .                  | .                  | . | . | .                  | . |
| Vv06g1569          | .            | .                  | .                  | . | . | .                  | . |
| .                  | .            | .                  | .                  | . | . | .                  | . |
| .                  | .            | .                  | .                  | . | . | .                  | . |
| Vv06g1570          | .            | Gorai.013G252000.1 | .                  | . | . | .                  | . |
| .                  | .            | .                  | .                  | . | . | .                  | . |
| .                  | .            | .                  | .                  | . | . | .                  | . |
| Vv06g1571          | .            | .                  | .                  | . | . | .                  | . |
| .                  | .            | .                  | .                  | . | . | .                  | . |
| .                  | .            | .                  | .                  | . | . | .                  | . |
| Vv06g1572          | .            | .                  | .                  | . | . | Gorai.009G074300.1 | . |
| Gorai.006G125800.1 | .            | .                  | .                  | . | . | .                  | . |
| .                  | .            | .                  | .                  | . | . | .                  | . |
| .                  | .            | .                  | .                  | . | . | .                  | . |
| Vv06g1573          | .            | .                  | .                  | . | . | .                  | . |
| .                  | .            | .                  | .                  | . | . | .                  | . |
| .                  | .            | .                  | .                  | . | . | .                  | . |
| Vv06g1574          | .            | Gorai.013G251900.1 | .                  | . | . | .                  | . |
| .                  | .            | .                  | .                  | . | . | .                  | . |
| .                  | .            | .                  | .                  | . | . | .                  | . |
| Vv06g1575          | .            | .                  | .                  | . | . | .                  | . |
| .                  | .            | .                  | .                  | . | . | .                  | . |
| .                  | .            | .                  | .                  | . | . | .                  | . |
| Vv06g1576          | .            | .                  | .                  | . | . | Gorai.             | . |
| 006G126000.1       | .            | .                  | .                  | . | . | .                  | . |
| .                  | .            | .                  | .                  | . | . | .                  | . |
| Vv06g1577          | Tc09_g003720 | .                  | Gorai.001G136800.1 | . | . | .                  | . |
| .                  | .            | .                  | .                  | . | . | .                  | . |
| .                  | .            | .                  | .                  | . | . | .                  | . |
| Vv06g1578          | .            | Gorai.001G136900.1 | .                  | . | . | .                  | . |
| .                  | .            | .                  | .                  | . | . | .                  | . |
| .                  | .            | .                  | .                  | . | . | .                  | . |
| Vv06g1579          | .            | Gorai.013G251800.1 | .                  | . | . | .                  | . |
| Gorai.009G074200.1 | .            | Gorai.006G135000.1 | .                  | . | . | .                  | . |
| .                  | .            | .                  | .                  | . | . | .                  | . |
| .                  | .            | .                  | .                  | . | . | .                  | . |
| Vv06g1580          | .            | .                  | .                  | . | . | .                  | . |
| .                  | .            | .                  | .                  | . | . | .                  | . |
| .                  | .            | .                  | .                  | . | . | .                  | . |
| Vv06g1581          | .            | .                  | .                  | . | . | .                  | . |

|                    |              |                    |   |                    |                    |   |   |
|--------------------|--------------|--------------------|---|--------------------|--------------------|---|---|
| .                  | .            | .                  | . | .                  | .                  | . | . |
| .                  | .            | .                  | . | .                  | .                  | . | . |
| Vv06g1582          | Tc09_g008700 | .                  | . | .                  | .                  | . | . |
| .                  | .            | .                  | . | .                  | .                  | . | . |
| Vv06g1583          | .            | .                  | . | .                  | .                  | . | . |
| .                  | .            | .                  | . | .                  | .                  | . | . |
| Vv06g1584          | .            | .                  | . | .                  | .                  | . | . |
| .                  | .            | .                  | . | .                  | .                  | . | . |
| Vv06g1585          | .            | Gorai.013G251700.1 | . | Gorai.001G137100.1 | .                  | . | . |
| .                  | .            | Gorai.006G126400.1 | . | .                  | .                  | . | . |
| .                  | .            | .                  | . | .                  | .                  | . | . |
| Vv06g1586          | .            | .                  | . | .                  | .                  | . | . |
| .                  | .            | .                  | . | .                  | .                  | . | . |
| Vv06g1587          | .            | .                  | . | .                  | .                  | . | . |
| .                  | .            | .                  | . | .                  | .                  | . | . |
| Vv06g1588          | .            | .                  | . | .                  | .                  | . | . |
| .                  | .            | .                  | . | .                  | .                  | . | . |
| Vv06g1589          | .            | .                  | . | .                  | Gorai.009G074000.1 | . | . |
| Gorai.006G126600.1 | .            | .                  | . | .                  | .                  | . | . |
| .                  | .            | .                  | . | .                  | .                  | . | . |
| .                  | .            | .                  | . | .                  | .                  | . | . |
| Vv06g1590          | .            | .                  | . | .                  | Gorai.             | . | . |
| 006G136100.1       | .            | .                  | . | .                  | .                  | . | . |
| .                  | .            | .                  | . | .                  | .                  | . | . |
| Vv06g1591          | .            | .                  | . | .                  | .                  | . | . |
| .                  | .            | .                  | . | .                  | .                  | . | . |
| Vv06g1592          | Tc09_g008960 | .                  | . | .                  | .                  | . | . |
| .                  | .            | .                  | . | .                  | .                  | . | . |
| Vv06g1593          | .            | .                  | . | .                  | .                  | . | . |
| .                  | .            | .                  | . | .                  | .                  | . | . |
| Vv06g1594          | .            | .                  | . | .                  | .                  | . | . |
| .                  | .            | .                  | . | .                  | .                  | . | . |
| Vv06g1595          | .            | .                  | . | .                  | .                  | . | . |
| .                  | .            | .                  | . | .                  | .                  | . | . |
| Vv06g1596          | .            | .                  | . | .                  | .                  | . | . |
| .                  | .            | .                  | . | .                  | .                  | . | . |
| Vv06g1597          | .            | .                  | . | .                  | .                  | . | . |

|                    |              |                    |   |   |   |                    |   |
|--------------------|--------------|--------------------|---|---|---|--------------------|---|
| .                  | .            | .                  | . | . | . | .                  | . |
| .                  | .            | .                  | . | . | . | .                  | . |
| Vv06g1598          | .            | .                  | . | . | . | .                  | . |
| .                  | .            | .                  | . | . | . | .                  | . |
| .                  | .            | .                  | . | . | . | .                  | . |
| Vv06g1599          | .            | Gorai.013G268400.1 | . | . | . | .                  | . |
| Gorai.009G071200.1 | .            | .                  | . | . | . | .                  | . |
| .                  | .            | .                  | . | . | . | .                  | . |
| .                  | .            | .                  | . | . | . | .                  | . |
| Vv06g1600          | .            | Gorai.013G268500.1 | . | . | . | .                  | . |
| Gorai.009G110000.1 | .            | Gorai.003G143900.1 | . | . | . | .                  | . |
| .                  | .            | .                  | . | . | . | .                  | . |
| .                  | .            | .                  | . | . | . | .                  | . |
| Vv06g1601          | .            | .                  | . | . | . | .                  | . |
| .                  | .            | .                  | . | . | . | .                  | . |
| .                  | .            | .                  | . | . | . | .                  | . |
| Vv06g1602          | .            | Gorai.013G268600.1 | . | . | . | .                  | . |
| Gorai.003G144000.1 | .            | .                  | . | . | . | .                  | . |
| .                  | .            | .                  | . | . | . | .                  | . |
| .                  | .            | .                  | . | . | . | .                  | . |
| Vv06g1603          | .            | .                  | . | . | . | .                  | . |
| .                  | .            | .                  | . | . | . | .                  | . |
| .                  | .            | .                  | . | . | . | .                  | . |
| Vv06g1604          | .            | .                  | . | . | . | Gorai.             | . |
| 003G144100.1       | .            | .                  | . | . | . | .                  | . |
| .                  | .            | .                  | . | . | . | .                  | . |
| Vv06g1605          | .            | .                  | . | . | . | .                  | . |
| .                  | .            | .                  | . | . | . | .                  | . |
| .                  | .            | .                  | . | . | . | .                  | . |
| Vv06g1606          | .            | .                  | . | . | . | Gorai.009G110300.1 | . |
| Gorai.006G165000.1 | .            | .                  | . | . | . | .                  | . |
| .                  | .            | .                  | . | . | . | .                  | . |
| .                  | .            | .                  | . | . | . | .                  | . |
| Vv06g1607          | .            | .                  | . | . | . | Gorai.009G110400.1 | . |
| .                  | .            | .                  | . | . | . | .                  | . |
| .                  | .            | .                  | . | . | . | .                  | . |
| Vv06g1608          | .            | .                  | . | . | . | .                  | . |
| .                  | .            | .                  | . | . | . | .                  | . |
| .                  | .            | .                  | . | . | . | .                  | . |
| Vv06g1609          | .            | .                  | . | . | . | .                  | . |
| .                  | .            | .                  | . | . | . | .                  | . |
| .                  | .            | .                  | . | . | . | .                  | . |
| Vv06g1610          | .            | .                  | . | . | . | .                  | . |
| .                  | .            | .                  | . | . | . | .                  | . |
| .                  | .            | .                  | . | . | . | .                  | . |
| Vv06g1611          | Tc09_g004980 | .                  | . | . | . | .                  | . |
| .                  | .            | .                  | . | . | . | .                  | . |
| .                  | .            | .                  | . | . | . | .                  | . |
| Vv06g1612          | Tc09_g014260 | .                  | . | . | . | .                  | . |
| .                  | .            | .                  | . | . | . | .                  | . |

|                    |                    |                    |   |        |                    |   |   |
|--------------------|--------------------|--------------------|---|--------|--------------------|---|---|
| Vv06g1613          | .                  | .                  | . | .      | .                  | . | . |
| .                  | .                  | .                  | . | .      | .                  | . | . |
| Vv06g1614          | .                  | .                  | . | .      | .                  | . | . |
| .                  | .                  | .                  | . | .      | .                  | . | . |
| Vv06g1615          | .                  | Gorai.013G268700.1 | . | .      | .                  | . | . |
| Gorai.003G144600.1 | .                  | .                  | . | .      | .                  | . | . |
| .                  | .                  | .                  | . | .      | .                  | . | . |
| Vv06g1616          | .                  | .                  | . | .      | .                  | . | . |
| .                  | .                  | .                  | . | .      | .                  | . | . |
| Vv06g1617          | .                  | Gorai.013G268900.1 | . | .      | .                  | . | . |
| .                  | .                  | .                  | . | .      | .                  | . | . |
| Vv06g1618          | .                  | .                  | . | .      | .                  | . | . |
| .                  | .                  | .                  | . | .      | .                  | . | . |
| Vv06g1619          | .                  | .                  | . | .      | .                  | . | . |
| .                  | .                  | .                  | . | .      | .                  | . | . |
| Vv06g1620          | .                  | .                  | . | .      | .                  | . | . |
| .                  | .                  | .                  | . | .      | .                  | . | . |
| Vv06g1621          | .                  | .                  | . | .      | Gorai.009G110700.1 | . | . |
| Gorai.006G163200.1 | .                  | .                  | . | .      | .                  | . | . |
| .                  | .                  | .                  | . | .      | .                  | . | . |
| Vv06g1622          | .                  | .                  | . | .      | .                  | . | . |
| .                  | .                  | .                  | . | .      | .                  | . | . |
| Vv06g1623          | .                  | .                  | . | .      | .                  | . | . |
| .                  | .                  | .                  | . | .      | .                  | . | . |
| Vv06g1624          | .                  | Gorai.013G269100.1 | . | .      | .                  | . | . |
| Gorai.006G162900.1 | .                  | Vv08g1449          | . | Gorai. | .                  | . | . |
| 006G162900.1       | .                  | .                  | . | .      | .                  | . | . |
| .                  | .                  | .                  | . | .      | .                  | . | . |
| Vv06g1625          | Tc09_g009270       | Gorai.013G269200.1 | . | .      | .                  | . | . |
| .                  | Gorai.003G145100.1 | .                  | . | .      | .                  | . | . |
| .                  | .                  | .                  | . | .      | .                  | . | . |
| Vv06g1626          | .                  | .                  | . | .      | .                  | . | . |
| .                  | .                  | .                  | . | .      | .                  | . | . |
| Vv06g1627          | Tc09_g016760       | .                  | . | .      | .                  | . | . |
| .                  | .                  | .                  | . | .      | .                  | . | . |
| .                  | .                  | .                  | . | .      | .                  | . | . |



|                    |                    |                    |                    |   |   |                    |   |
|--------------------|--------------------|--------------------|--------------------|---|---|--------------------|---|
| Vv06g1628          | .                  | .                  | .                  | . | . | .                  | . |
| .                  | .                  | .                  | .                  | . | . | .                  | . |
| Vv06g1629          | Tc09_g005160       | .                  | .                  | . | . | .                  | . |
| .                  | .                  | .                  | .                  | . | . | .                  | . |
| Vv06g1630          | .                  | .                  | .                  | . | . | Gorai.             | . |
| 006G162700.1       | Vv08g1442          | Tc05_g007120       | Gorai.006G162700.1 | . | . | .                  | . |
| .                  | Gorai.009G414500.1 | Gorai.007G373100.1 | .                  | . | . | .                  | . |
| .                  | .                  | .                  | .                  | . | . | .                  | . |
| Vv06g1631          | .                  | .                  | .                  | . | . | .                  | . |
| .                  | .                  | .                  | .                  | . | . | .                  | . |
| Vv06g1632          | Tc09_g014490       | .                  | .                  | . | . | .                  | . |
| .                  | .                  | .                  | .                  | . | . | .                  | . |
| Vv06g1633          | .                  | .                  | .                  | . | . | .                  | . |
| .                  | .                  | .                  | .                  | . | . | .                  | . |
| Vv06g1634          | .                  | .                  | .                  | . | . | .                  | . |
| .                  | .                  | .                  | .                  | . | . | .                  | . |
| Vv06g1635          | .                  | .                  | .                  | . | . | Gorai.             | . |
| 003G145500.1       | .                  | .                  | .                  | . | . | .                  | . |
| .                  | .                  | .                  | .                  | . | . | .                  | . |
| Vv06g1636          | Tc09_g009340       | .                  | .                  | . | . | Gorai.             | . |
| 009G110900.1       | Gorai.006G162400.1 | Vv08g1437          | .                  | . | . | .                  | . |
| Tc05_g007170       | Gorai.006G162400.1 | .                  | .                  | . | . | Gorai.             | . |
| 009G414100.1       | Gorai.007G373000.1 | .                  | .                  | . | . | .                  | . |
| .                  | .                  | .                  | .                  | . | . | .                  | . |
| Vv06g1637          | Gorai.013G269400.1 | .                  | .                  | . | . | .                  | . |
| Gorai.009G111000.1 | Gorai.006G138400.1 | .                  | .                  | . | . | .                  | . |
| .                  | .                  | .                  | .                  | . | . | .                  | . |
| Vv06g1638          | .                  | .                  | .                  | . | . | .                  | . |
| .                  | .                  | .                  | .                  | . | . | .                  | . |
| Vv06g1639          | .                  | .                  | .                  | . | . | .                  | . |
| .                  | .                  | .                  | .                  | . | . | .                  | . |
| Vv06g1640          | .                  | .                  | .                  | . | . | .                  | . |
| .                  | .                  | .                  | .                  | . | . | .                  | . |
| Vv06g1641          | .                  | .                  | .                  | . | . | Gorai.009G111200.1 | . |
| Gorai.006G161600.1 | Vv08g1430          | Tc05_g007230       | .                  | . | . | .                  | . |
| Gorai.006G161600.1 | .                  | .                  | .                  | . | . | .                  | . |
| .                  | .                  | .                  | .                  | . | . | .                  | . |
| Vv06g1642          | .                  | .                  | .                  | . | . | Gorai.             | . |
| 003G145800.1       | .                  | .                  | .                  | . | . | .                  | . |
| .                  | .                  | .                  | .                  | . | . | .                  | . |

|                    |                    |                    |                    |   |   |                    |   |
|--------------------|--------------------|--------------------|--------------------|---|---|--------------------|---|
| Vv06g1643          | .                  | .                  | .                  | . | . | .                  | . |
| .                  | .                  | .                  | .                  | . | . | .                  | . |
| Vv06g1644          | .                  | .                  | .                  | . | . | Gorai.009G111300.1 | . |
| .                  | .                  | .                  | .                  | . | . | .                  | . |
| Vv06g1645          | .                  | .                  | .                  | . | . | .                  | . |
| .                  | .                  | .                  | .                  | . | . | .                  | . |
| Vv06g1646          | Tc09_g016530       | .                  | .                  | . | . | .                  | . |
| .                  | .                  | .                  | .                  | . | . | .                  | . |
| Vv06g1647          | .                  | .                  | .                  | . | . | .                  | . |
| .                  | .                  | .                  | .                  | . | . | .                  | . |
| Vv06g1648          | .                  | .                  | .                  | . | . | .                  | . |
| .                  | .                  | .                  | .                  | . | . | .                  | . |
| Vv06g1649          | Tc09_g009730       | .                  | .                  | . | . | .                  | . |
| .                  | .                  | .                  | .                  | . | . | .                  | . |
| Vv06g1650          | .                  | .                  | .                  | . | . | .                  | . |
| .                  | .                  | .                  | .                  | . | . | .                  | . |
| Vv06g1651          | .                  | .                  | .                  | . | . | .                  | . |
| .                  | .                  | .                  | .                  | . | . | .                  | . |
| Vv06g1652          | .                  | .                  | .                  | . | . | Gorai.009G111400.1 | . |
| Gorai.003G145900.1 | .                  | .                  | .                  | . | . | .                  | . |
| .                  | .                  | .                  | .                  | . | . | .                  | . |
| Vv06g1653          | .                  | .                  | .                  | . | . | Gorai.             | . |
| 003G146000.1       | .                  | .                  | .                  | . | . | .                  | . |
| .                  | .                  | .                  | .                  | . | . | .                  | . |
| Vv06g1654          | .                  | .                  | .                  | . | . | Gorai.             | . |
| 003G146100.1       | .                  | .                  | .                  | . | . | .                  | . |
| .                  | .                  | .                  | .                  | . | . | .                  | . |
| Vv06g1655          | .                  | .                  | .                  | . | . | Gorai.             | . |
| 003G146200.1       | Vv08g1424          | .                  | .                  | . | . | .                  | . |
| Gorai.009G413400.1 | .                  | .                  | .                  | . | . | .                  | . |
| .                  | .                  | .                  | .                  | . | . | .                  | . |
| Vv06g1656          | Tc09_g029640       | .                  | .                  | . | . | Gorai.             | . |
| 009G090400.1       | Gorai.006G105000.1 | .                  | .                  | . | . | .                  | . |
| .                  | .                  | .                  | .                  | . | . | .                  | . |
| .                  | .                  | .                  | .                  | . | . | .                  | . |
| Vv06g1657          | .                  | .                  | .                  | . | . | .                  | . |
| Vv08g1423          | .                  | .                  | Gorai.002G248400.1 | . | . | .                  | . |
| Gorai.009G413000.1 | Gorai.007G372700.1 | .                  | .                  | . | . | .                  | . |
| .                  | .                  | .                  | .                  | . | . | .                  | . |
| Vv06g1658          | Tc09_g029630       | Gorai.013G259300.1 | .                  | . | . | .                  | . |

|                    |                    |                    |   |                    |                    |   |   |
|--------------------|--------------------|--------------------|---|--------------------|--------------------|---|---|
| .                  | .                  | .                  | . | .                  | .                  | . | . |
| .                  | .                  | .                  | . | .                  | .                  | . | . |
| Vv06g1659          | .                  | .                  | . | .                  | Gorai.009G090300.1 | . | . |
|                    | Gorai.006G104900.1 | .                  | . | .                  | .                  | . | . |
| .                  | .                  | .                  | . | .                  | .                  | . | . |
| .                  | .                  | .                  | . | .                  | .                  | . | . |
| Vv06g1660          | Tc09_g029610       | .                  | . | Gorai.001G117100.1 | .                  | . | . |
|                    | Gorai.009G090200.1 | Gorai.006G161200.1 | . | .                  | .                  | . | . |
| .                  | .                  | .                  | . | .                  | .                  | . | . |
| .                  | .                  | .                  | . | .                  | .                  | . | . |
| Vv06g1661          | Tc09_g029600       | .                  | . | .                  | Gorai.             | . | . |
| 009G090100.1       | .                  | .                  | . | .                  | .                  | . | . |
| .                  | .                  | .                  | . | .                  | .                  | . | . |
| Vv06g1662          | .                  | .                  | . | .                  | .                  | . | . |
| .                  | .                  | .                  | . | .                  | .                  | . | . |
| .                  | .                  | .                  | . | .                  | .                  | . | . |
| Vv06g1663          | Tc09_g029570       | .                  | . | Gorai.001G117200.1 | .                  | . | . |
| .                  | .                  | .                  | . | .                  | .                  | . | . |
| .                  | .                  | .                  | . | .                  | .                  | . | . |
| Vv06g1664          | Tc09_g029560       | .                  | . | .                  | .                  | . | . |
| .                  | .                  | .                  | . | .                  | .                  | . | . |
| .                  | .                  | .                  | . | .                  | .                  | . | . |
| Vv06g1665          | Tc09_g029380       | .                  | . | Gorai.001G117400.1 | .                  | . | . |
|                    | Gorai.009G089700.1 | .                  | . | .                  | .                  | . | . |
| .                  | .                  | .                  | . | .                  | .                  | . | . |
| .                  | .                  | .                  | . | .                  | .                  | . | . |
| Vv06g1666          | Tc09_g029370       | .                  | . | .                  | .                  | . | . |
| Gorai.006G158300.1 | Vv08g1389          | .                  | . | .                  | Gorai.             | . | . |
| 002G245500.1       | .                  | .                  | . | .                  | .                  | . | . |
| .                  | .                  | .                  | . | .                  | .                  | . | . |
| Vv06g1667          | .                  | .                  | . | Gorai.001G117500.1 | .                  | . | . |
|                    | Gorai.006G104200.1 | Vv08g1388          | . | .                  | .                  | . | . |
| Gorai.002G245400.1 | .                  | .                  | . | .                  | .                  | . | . |
| .                  | .                  | .                  | . | .                  | .                  | . | . |
| Vv06g1668          | .                  | .                  | . | .                  | .                  | . | . |
| .                  | .                  | .                  | . | .                  | .                  | . | . |
| .                  | .                  | .                  | . | .                  | .                  | . | . |
| Vv06g1669          | Tc09_g029340       | .                  | . | Gorai.001G117600.1 | .                  | . | . |
|                    | Gorai.009G089300.1 | Gorai.006G104000.1 | . | .                  | .                  | . | . |
| .                  | .                  | .                  | . | .                  | .                  | . | . |
| .                  | .                  | .                  | . | .                  | .                  | . | . |
| Vv06g1670          | Tc09_g029300       | .                  | . | Gorai.001G117900.1 | .                  | . | . |
|                    | Gorai.009G089200.1 | .                  | . | .                  | .                  | . | . |
| .                  | .                  | .                  | . | .                  | .                  | . | . |
| .                  | .                  | .                  | . | .                  | .                  | . | . |
| Vv06g1671          | Tc09_g029270       | .                  | . | .                  | .                  | . | . |
| Gorai.006G103700.1 | Vv08g1386          | .                  | . | .                  | .                  | . | . |
| .                  | .                  | .                  | . | .                  | .                  | . | . |
| .                  | .                  | .                  | . | .                  | .                  | . | . |
| Vv06g1672          | .                  | .                  | . | .                  | .                  | . | . |

|                    |                    |                    |                    |   |        |   |   |
|--------------------|--------------------|--------------------|--------------------|---|--------|---|---|
| .                  | .                  | .                  | .                  | . | .      | . | . |
| Vv06g1673          | Tc09_g029260       | .                  | Gorai.001G118200.1 | . | .      | . | . |
|                    | Gorai.009G089000.1 | .                  | .                  | . | .      | . | . |
| .                  | .                  | .                  | .                  | . | .      | . | . |
| Vv06g1674          | .                  | .                  | Gorai.004G007900.1 | . | .      | . | . |
| .                  | .                  | .                  | .                  | . | .      | . | . |
| Vv06g1675          | .                  | .                  | .                  | . | Gorai. | . | . |
| 006G103600.1       | .                  | .                  | .                  | . | .      | . | . |
| .                  | .                  | .                  | .                  | . | .      | . | . |
| Vv06g1676          | Tc09_g029250       | .                  | Gorai.001G118300.1 | . | .      | . | . |
|                    | Gorai.009G088900.1 | .                  | .                  | . | .      | . | . |
| .                  | .                  | .                  | .                  | . | .      | . | . |
| Vv06g1677          | .                  | .                  | .                  | . | .      | . | . |
| .                  | .                  | .                  | .                  | . | .      | . | . |
| Vv06g1678          | Tc09_g029240       | .                  | .                  | . | .      | . | . |
| .                  | .                  | .                  | .                  | . | .      | . | . |
| Vv06g1679          | .                  | .                  | .                  | . | .      | . | . |
| .                  | .                  | .                  | .                  | . | .      | . | . |
| Vv06g1680          | Tc09_g029230       | .                  | .                  | . | .      | . | . |
| .                  | .                  | .                  | .                  | . | .      | . | . |
| Vv06g1681          | .                  | .                  | .                  | . | .      | . | . |
| .                  | .                  | .                  | .                  | . | .      | . | . |
| Vv06g1682          | .                  | .                  | .                  | . | .      | . | . |
| .                  | .                  | .                  | .                  | . | .      | . | . |
| Vv06g1683          | Tc09_g029220       | .                  | .                  | . | .      | . | . |
| .                  | .                  | .                  | .                  | . | .      | . | . |
| Vv06g1684          | .                  | .                  | .                  | . | Gorai. | . | . |
| 006G103400.1       | .                  | .                  | .                  | . | .      | . | . |
| .                  | .                  | .                  | .                  | . | .      | . | . |
| Vv06g1685          | Tc09_g029210       | .                  | Gorai.001G118400.1 | . | .      | . | . |
| .                  | .                  | .                  | .                  | . | .      | . | . |
| Vv06g1686          | Tc09_g029200       | Gorai.013G259200.1 | Gorai.             | . | .      | . | . |
| 001G118500.1       | .                  | Gorai.006G103200.1 | Vv08g1374          | . | .      | . | . |
|                    | Tc05_g007650       | Gorai.002G245300.1 | .                  | . | .      | . | . |
| .                  | .                  | .                  | .                  | . | .      | . | . |
| Vv06g1687          | Tc09_g029180       | .                  | .                  | . | .      | . | . |
| Gorai.006G103000.1 | .                  | .                  | .                  | . | .      | . | . |
| .                  | .                  | .                  | .                  | . | .      | . | . |

|              |                    |                    |                    |                    |        |
|--------------|--------------------|--------------------|--------------------|--------------------|--------|
| Vv06g1688    | Tc09_g029160       | .                  | .                  | .                  | Gorai. |
| 009G088800.1 | Gorai.006G102900.1 | .                  | .                  | .                  | .      |
| .            | .                  | .                  | .                  | .                  | .      |
| .            | .                  | .                  | .                  | .                  | .      |
| Vv06g1689    | Tc09_g029150       | Gorai.013G259100.1 | .                  | .                  | .      |
| .            | Gorai.006G102800.1 | .                  | .                  | .                  | .      |
| .            | .                  | .                  | .                  | .                  | .      |
| .            | .                  | .                  | .                  | .                  | .      |
| Vv06g1690    | .                  | .                  | .                  | .                  | .      |
| .            | .                  | .                  | .                  | .                  | .      |
| .            | .                  | .                  | .                  | .                  | .      |
| Vv06g1691    | .                  | .                  | .                  | .                  | .      |
| .            | .                  | .                  | .                  | .                  | .      |
| .            | .                  | .                  | .                  | .                  | .      |
| Vv06g1692    | Tc09_g029140       | .                  | Gorai.001G118600.1 | .                  | .      |
| .            | .                  | .                  | .                  | .                  | .      |
| .            | .                  | .                  | .                  | .                  | .      |
| .            | .                  | .                  | .                  | .                  | .      |
| Vv06g1693    | .                  | .                  | .                  | .                  | Gorai. |
| 006G100200.1 | .                  | .                  | .                  | .                  | .      |
| .            | .                  | .                  | .                  | .                  | .      |
| .            | .                  | .                  | .                  | .                  | .      |
| Vv06g1694    | Tc09_g029130       | Gorai.013G259000.1 | .                  | .                  | .      |
| .            | .                  | .                  | .                  | .                  | .      |
| .            | .                  | .                  | .                  | .                  | .      |
| .            | .                  | .                  | .                  | .                  | .      |
| Vv06g1695    | Tc09_g029120       | .                  | Gorai.001G118700.1 | .                  | .      |
| .            | .                  | .                  | .                  | .                  | .      |
| .            | .                  | .                  | .                  | .                  | .      |
| .            | .                  | .                  | .                  | .                  | .      |
| Vv06g1696    | Tc09_g029110       | Gorai.013G258900.1 | .                  | Gorai.             | .      |
| 001G118800.1 | .                  | .                  | .                  | .                  | .      |
| .            | .                  | .                  | .                  | .                  | .      |
| .            | .                  | .                  | .                  | .                  | .      |
| Vv06g1697    | Tc09_g029070       | Gorai.013G258800.1 | .                  | Gorai.             | .      |
| 001G118900.1 | .                  | Gorai.009G088500.1 | .                  | Gorai.006G108100.1 | .      |
| .            | .                  | .                  | .                  | .                  | .      |
| .            | .                  | .                  | .                  | .                  | .      |
| .            | .                  | .                  | .                  | .                  | .      |
| Vv06g1698    | Tc09_g029060       | .                  | Gorai.001G119000.1 | .                  | .      |
| .            | Gorai.006G108300.1 | .                  | .                  | .                  | .      |
| .            | .                  | .                  | .                  | .                  | .      |
| .            | .                  | .                  | .                  | .                  | .      |
| Vv06g1699    | .                  | .                  | .                  | .                  | .      |
| .            | .                  | .                  | .                  | .                  | .      |
| .            | .                  | .                  | .                  | .                  | .      |
| .            | .                  | .                  | .                  | .                  | .      |
| Vv06g1700    | Tc09_g029050       | Gorai.013G258700.1 | .                  | .                  | .      |
| .            | Gorai.006G108400.1 | .                  | .                  | .                  | .      |
| .            | .                  | .                  | .                  | .                  | .      |
| .            | .                  | .                  | .                  | .                  | .      |
| Vv06g1701    | Tc09_g029040       | .                  | .                  | Gorai.004G008000.1 | .      |
| .            | Gorai.006G108500.1 | .                  | .                  | .                  | .      |
| .            | .                  | .                  | .                  | .                  | .      |
| .            | .                  | .                  | .                  | .                  | .      |
| Vv06g1702    | .                  | .                  | .                  | .                  | .      |

|                    |                    |                    |   |                    |        |   |   |
|--------------------|--------------------|--------------------|---|--------------------|--------|---|---|
| .                  | .                  | .                  | . | .                  | .      | . | . |
| .                  | .                  | .                  | . | .                  | .      | . | . |
| Vv06g1703          | Tc09_g029030       | .                  | . | .                  | .      | . | . |
| Gorai.006G108600.1 | .                  | .                  | . | .                  | .      | . | . |
| .                  | .                  | .                  | . | .                  | .      | . | . |
| Vv06g1704          | Tc09_g029010       | Gorai.013G258600.1 | . | .                  | .      | . | . |
| .                  | .                  | .                  | . | .                  | .      | . | . |
| Vv06g1705          | .                  | .                  | . | .                  | .      | . | . |
| .                  | .                  | .                  | . | .                  | .      | . | . |
| Vv06g1706          | Tc09_g028980       | .                  | . | .                  | .      | . | . |
| Gorai.006G109000.1 | .                  | .                  | . | .                  | .      | . | . |
| .                  | .                  | .                  | . | .                  | .      | . | . |
| Vv06g1707          | Tc09_g028950       | .                  | . | Gorai.004G008100.1 | .      | . | . |
| .                  | Gorai.006G109100.1 | .                  | . | .                  | .      | . | . |
| .                  | .                  | .                  | . | .                  | .      | . | . |
| .                  | .                  | .                  | . | .                  | .      | . | . |
| Vv06g1708          | Tc09_g028910       | .                  | . | .                  | .      | . | . |
| Gorai.006G109300.1 | .                  | .                  | . | .                  | .      | . | . |
| .                  | .                  | .                  | . | .                  | .      | . | . |
| Vv06g1709          | .                  | .                  | . | .                  | .      | . | . |
| .                  | .                  | .                  | . | .                  | .      | . | . |
| .                  | .                  | .                  | . | .                  | .      | . | . |
| Vv06g1710          | .                  | .                  | . | .                  | .      | . | . |
| .                  | .                  | .                  | . | .                  | .      | . | . |
| .                  | .                  | .                  | . | .                  | .      | . | . |
| Vv06g1711          | Tc09_g028900       | Gorai.001G119300.1 | . | .                  | .      | . | . |
| .                  | Gorai.006G109400.1 | .                  | . | .                  | .      | . | . |
| .                  | .                  | .                  | . | .                  | .      | . | . |
| .                  | .                  | .                  | . | .                  | .      | . | . |
| Vv06g1712          | Tc09_g028890       | Gorai.001G119400.1 | . | .                  | .      | . | . |
| .                  | .                  | .                  | . | .                  | .      | . | . |
| .                  | .                  | .                  | . | .                  | .      | . | . |
| Vv06g1713          | Tc09_g028880       | .                  | . | .                  | Gorai. | . | . |
| 009G088400.1       | .                  | .                  | . | .                  | .      | . | . |
| .                  | .                  | .                  | . | .                  | .      | . | . |
| Vv06g1714          | .                  | .                  | . | .                  | Gorai. | . | . |
| 006G158300.1       | .                  | .                  | . | .                  | .      | . | . |
| .                  | .                  | .                  | . | .                  | .      | . | . |
| Vv06g1715          | .                  | .                  | . | .                  | .      | . | . |
| .                  | .                  | .                  | . | .                  | .      | . | . |
| .                  | .                  | .                  | . | .                  | .      | . | . |
| Vv06g1716          | .                  | .                  | . | .                  | .      | . | . |
| .                  | .                  | .                  | . | .                  | .      | . | . |
| .                  | .                  | .                  | . | .                  | .      | . | . |
| Vv06g1717          | Tc09_g028840       | .                  | . | Gorai.004G008200.1 | .      | . | . |
| .                  | Gorai.006G109800.1 | .                  | . | .                  | .      | . | . |
| .                  | .                  | .                  | . | .                  | .      | . | . |
| .                  | .                  | .                  | . | .                  | .      | . | . |

|                    |                    |   |   |                    |   |   |   |
|--------------------|--------------------|---|---|--------------------|---|---|---|
| Vv06g1718          | .                  | . | . | .                  | . | . | . |
| .                  | .                  | . | . | .                  | . | . | . |
| Vv06g1719          | Tc09_g028820       | . | . | Gorai.001G119800.1 | . | . | . |
| .                  | .                  | . | . | .                  | . | . | . |
| Vv06g1720          | .                  | . | . | .                  | . | . | . |
| .                  | .                  | . | . | .                  | . | . | . |
| Vv06g1721          | .                  | . | . | .                  | . | . | . |
| .                  | .                  | . | . | .                  | . | . | . |
| Vv06g1722          | Tc09_g028810       | . | . | Gorai.004G008300.1 | . | . | . |
| .                  | .                  | . | . | .                  | . | . | . |
| Vv06g1723          | Tc09_g028800       | . | . | Gorai.001G119900.1 | . | . | . |
| Gorai.009G088100.1 | .                  | . | . | .                  | . | . | . |
| .                  | .                  | . | . | .                  | . | . | . |
| Vv06g1724          | Tc09_g028790       | . | . | Gorai.001G120000.1 | . | . | . |
| Gorai.009G088000.1 | Gorai.006G109900.1 | . | . | .                  | . | . | . |
| .                  | .                  | . | . | .                  | . | . | . |
| Vv06g1725          | Tc09_g028780       | . | . | .                  | . | . | . |
| Gorai.006G110000.1 | .                  | . | . | .                  | . | . | . |
| .                  | .                  | . | . | .                  | . | . | . |
| Vv06g1726          | Tc09_g028770       | . | . | Gorai.004G008400.1 | . | . | . |
| Gorai.009G087900.1 | .                  | . | . | .                  | . | . | . |
| .                  | .                  | . | . | .                  | . | . | . |
| Vv06g1727          | .                  | . | . | .                  | . | . | . |
| .                  | .                  | . | . | .                  | . | . | . |
| Vv06g1728          | .                  | . | . | .                  | . | . | . |
| .                  | .                  | . | . | .                  | . | . | . |
| Vv06g1729          | Tc09_g028750       | . | . | Gorai.             | . | . | . |
| 009G087700.1       | .                  | . | . | .                  | . | . | . |
| .                  | .                  | . | . | .                  | . | . | . |
| Vv06g1730          | Tc09_g028740       | . | . | .                  | . | . | . |
| Gorai.006G110100.1 | .                  | . | . | .                  | . | . | . |
| .                  | .                  | . | . | .                  | . | . | . |
| Vv06g1731          | Tc09_g028730       | . | . | Gorai.001G120100.1 | . | . | . |
| .                  | .                  | . | . | .                  | . | . | . |
| Vv06g1732          | Tc09_g028710       | . | . | Gorai.001G120300.1 | . | . | . |
| Gorai.006G157400.1 | .                  | . | . | .                  | . | . | . |
| .                  | .                  | . | . | .                  | . | . | . |
| Vv06g1733          | Tc09_g028700       | . | . | Gorai.001G120400.1 | . | . | . |

|                    |                    |                    |   |   |   |                    |   |
|--------------------|--------------------|--------------------|---|---|---|--------------------|---|
| .                  | .                  | .                  | . | . | . | .                  | . |
| .                  | .                  | .                  | . | . | . | .                  | . |
| Vv06g1734          | .                  | .                  | . | . | . | .                  | . |
| .                  | .                  | .                  | . | . | . | .                  | . |
| Vv06g1735          | .                  | .                  | . | . | . | .                  | . |
| .                  | .                  | .                  | . | . | . | .                  | . |
| Vv06g1736          | .                  | .                  | . | . | . | .                  | . |
| .                  | .                  | .                  | . | . | . | .                  | . |
| Vv06g1737          | .                  | .                  | . | . | . | .                  | . |
| .                  | .                  | .                  | . | . | . | .                  | . |
| Vv06g1738          | .                  | .                  | . | . | . | .                  | . |
| .                  | .                  | .                  | . | . | . | .                  | . |
| Vv06g1739          | Tc09_g028690       | .                  | . | . | . | .                  | . |
| Gorai.006G157200.1 | .                  | .                  | . | . | . | .                  | . |
| .                  | .                  | .                  | . | . | . | .                  | . |
| Vv06g1740          | .                  | .                  | . | . | . | .                  | . |
| .                  | .                  | .                  | . | . | . | .                  | . |
| Vv06g1741          | .                  | .                  | . | . | . | .                  | . |
| .                  | .                  | .                  | . | . | . | .                  | . |
| Vv06g1742          | .                  | .                  | . | . | . | .                  | . |
| .                  | .                  | .                  | . | . | . | .                  | . |
| Vv06g1743          | Tc09_g028670       | .                  | . | . | . | Gorai.             | . |
| 009G087600.1       | .                  | .                  | . | . | . | .                  | . |
| .                  | .                  | .                  | . | . | . | .                  | . |
| Vv06g1744          | .                  | .                  | . | . | . | .                  | . |
| .                  | .                  | .                  | . | . | . | .                  | . |
| Vv06g1745          | Tc09_g028660       | Gorai.013G256700.1 | . | . | . | .                  | . |
| .                  | Gorai.006G110500.1 | .                  | . | . | . | .                  | . |
| .                  | .                  | .                  | . | . | . | .                  | . |
| Vv06g1746          | Tc09_g028630       | Gorai.013G253900.1 | . | . | . | .                  | . |
| .                  | Gorai.006G110700.1 | .                  | . | . | . | .                  | . |
| .                  | .                  | .                  | . | . | . | .                  | . |
| Vv06g1747          | .                  | .                  | . | . | . | Gorai.009G087400.1 | . |
| .                  | .                  | .                  | . | . | . | .                  | . |
| Vv06g1748          | Tc09_g028620       | .                  | . | . | . | .                  | . |
| .                  | .                  | .                  | . | . | . | .                  | . |
| Vv06g1749          | .                  | .                  | . | . | . | Gorai.             | . |



|              |                    |                    |                    |        |   |   |
|--------------|--------------------|--------------------|--------------------|--------|---|---|
| 006G156900.1 | .                  | .                  | .                  | .      | . | . |
| Vv06g1750    | Tc09_g028610       | .                  | Gorai.001G120600.1 | .      | . | . |
| Vv06g1751    | .                  | .                  | .                  | .      | . | . |
| Vv06g1752    | Tc09_g028600       | .                  | Gorai.001G120700.1 | .      | . | . |
| Vv06g1753    | .                  | .                  | .                  | .      | . | . |
| Vv06g1754    | Tc09_g028580       | .                  | Gorai.001G120800.1 | .      | . | . |
|              | Gorai.009G087300.1 | Gorai.006G156700.1 | .                  | .      | . | . |
| Vv06g1755    | Tc09_g028560       | .                  | .                  | Gorai. | . | . |
| 009G087200.1 | .                  | .                  | .                  | .      | . | . |
| Vv06g1756    | .                  | .                  | .                  | Gorai. | . | . |
| 006G153700.1 | .                  | .                  | .                  | .      | . | . |
| Vv06g1757    | .                  | .                  | .                  | .      | . | . |
| Vv06g1758    | Tc09_g028550       | .                  | Gorai.001G120900.1 | .      | . | . |
| Vv06g1759    | Tc09_g028540       | .                  | Gorai.001G121000.1 | .      | . | . |
| Vv06g1760    | Tc09_g028530       | .                  | .                  | Gorai. | . | . |
| 009G087100.1 | .                  | .                  | .                  | .      | . | . |
| Vv06g1761    | Tc09_g028520       | .                  | Gorai.004G008500.1 | .      | . | . |
| Vv06g1762    | .                  | .                  | .                  | .      | . | . |
| Vv06g1763    | .                  | .                  | .                  | .      | . | . |
| Vv06g1764    | Tc09_g028510       | .                  | .                  | Gorai. | . | . |
| 009G087000.1 | .                  | .                  | .                  | .      | . | . |
| Vv06g1765    | .                  | .                  | .                  | .      | . | . |

|           |                    |   |   |   |                    |   |   |
|-----------|--------------------|---|---|---|--------------------|---|---|
| Vv06g1766 | .                  | . | . | . | .                  | . | . |
| .         | .                  | . | . | . | .                  | . | . |
| Vv06g1767 | Tc09_g028460       | . | . | . | Gorai.004G009100.1 | . | . |
| .         | Gorai.009G086900.1 | . | . | . | .                  | . | . |
| .         | .                  | . | . | . | .                  | . | . |
| Vv06g1768 | Tc09_g028430       | . | . | . | .                  | . | . |
| .         | .                  | . | . | . | .                  | . | . |
| Vv06g1769 | Tc09_g028090       | . | . | . | Gorai.001G121200.1 | . | . |
| .         | Gorai.006G111100.1 | . | . | . | .                  | . | . |
| .         | .                  | . | . | . | .                  | . | . |
| Vv06g1770 | .                  | . | . | . | .                  | . | . |
| .         | .                  | . | . | . | .                  | . | . |
| Vv06g1771 | Tc09_g028080       | . | . | . | Gorai.004G009200.1 | . | . |
| .         | .                  | . | . | . | .                  | . | . |
| Vv06g1772 | Tc09_g028070       | . | . | . | Gorai.004G009300.1 | . | . |
| .         | Gorai.009G083900.1 | . | . | . | .                  | . | . |
| .         | .                  | . | . | . | .                  | . | . |
| Vv06g1773 | Tc09_g028060       | . | . | . | .                  | . | . |
| .         | .                  | . | . | . | .                  | . | . |
| Vv06g1774 | Tc09_g028050       | . | . | . | .                  | . | . |
| .         | .                  | . | . | . | .                  | . | . |
| Vv06g1775 | .                  | . | . | . | .                  | . | . |
| .         | .                  | . | . | . | .                  | . | . |
| Vv06g1776 | .                  | . | . | . | .                  | . | . |
| .         | .                  | . | . | . | .                  | . | . |
| Vv06g1777 | .                  | . | . | . | .                  | . | . |
| .         | .                  | . | . | . | .                  | . | . |
| Vv06g1778 | .                  | . | . | . | .                  | . | . |
| .         | .                  | . | . | . | .                  | . | . |
| Vv06g1779 | .                  | . | . | . | .                  | . | . |
| .         | .                  | . | . | . | .                  | . | . |
| Vv07g0001 | .                  | . | . | . | .                  | . | . |
| .         | .                  | . | . | . | .                  | . | . |
| Vv07g0002 | .                  | . | . | . | .                  | . | . |

|                    |              |                    |                    |   |                    |   |   |
|--------------------|--------------|--------------------|--------------------|---|--------------------|---|---|
| .                  | .            | .                  | .                  | . | .                  | . | . |
| .                  | .            | .                  | .                  | . | .                  | . | . |
| Vv07g0003          | .            | .                  | .                  | . | .                  | . | . |
| .                  | .            | .                  | .                  | . | .                  | . | . |
| Vv07g0004          | .            | .                  | .                  | . | .                  | . | . |
| .                  | .            | .                  | .                  | . | .                  | . | . |
| Vv07g0005          | .            | Gorai.007G143800.1 | .                  | . | .                  | . | . |
| .                  | .            | .                  | .                  | . | .                  | . | . |
| Vv07g0006          | .            | .                  | .                  | . | .                  | . | . |
| .                  | .            | .                  | .                  | . | .                  | . | . |
| Vv07g0007          | .            | .                  | .                  | . | .                  | . | . |
| .                  | .            | .                  | .                  | . | .                  | . | . |
| Vv07g0008          | .            | .                  | .                  | . | .                  | . | . |
| .                  | .            | .                  | .                  | . | .                  | . | . |
| Vv07g0009          | Tc01_g032180 | .                  | .                  | . | .                  | . | . |
| .                  | .            | .                  | .                  | . | .                  | . | . |
| Vv07g0010          | .            | .                  | .                  | . | .                  | . | . |
| .                  | .            | .                  | .                  | . | .                  | . | . |
| Vv07g0011          | .            | .                  | .                  | . | .                  | . | . |
| .                  | .            | .                  | .                  | . | .                  | . | . |
| Vv07g0012          | .            | .                  | .                  | . | Gorai.004G056900.1 | . | . |
| .                  | .            | .                  | .                  | . | .                  | . | . |
| Vv07g0013          | .            | .                  | .                  | . | Gorai.004G073900.1 | . | . |
| .                  | .            | .                  | .                  | . | .                  | . | . |
| Vv07g0014          | .            | Gorai.007G143300.1 | .                  | . | .                  | . | . |
| Gorai.004G074000.1 | .            | .                  | .                  | . | .                  | . | . |
| .                  | .            | .                  | .                  | . | .                  | . | . |
| Vv07g0015          | .            | .                  | .                  | . | .                  | . | . |
| .                  | .            | .                  | .                  | . | .                  | . | . |
| Vv07g0016          | .            | Gorai.007G143200.1 | .                  | . | .                  | . | . |
| Gorai.004G247700.1 | .            | .                  | .                  | . | .                  | . | . |
| .                  | .            | .                  | .                  | . | .                  | . | . |
| Vv07g0017          | Tc01_g031900 | .                  | Gorai.008G138300.1 | . | .                  | . | . |
| .                  | .            | .                  | .                  | . | .                  | . | . |
| Vv07g0018          | .            | .                  | .                  | . | Gorai.004G074100.1 | . | . |

|                    |                    |                    |                    |   |   |
|--------------------|--------------------|--------------------|--------------------|---|---|
| .                  | Vv05g0696          | Tc04_g024760       | .                  | . | . |
| Gorai.011G171100.1 | .                  | .                  | .                  | . | . |
| .                  | .                  | .                  | .                  | . | . |
| Vv07g0019          | .                  | .                  | .                  | . | . |
| Vv05g0693          | .                  | .                  | .                  | . | . |
| .                  | .                  | .                  | .                  | . | . |
| Vv07g0020          | .                  | .                  | .                  | . | . |
| .                  | .                  | .                  | .                  | . | . |
| Vv07g0021          | .                  | .                  | .                  | . | . |
| .                  | .                  | .                  | .                  | . | . |
| Vv07g0022          | .                  | .                  | .                  | . | . |
| Vv05g0692          | Tc04_g024750       | Gorai.006G246500.1 | Gorai.             | . | . |
| 005G046800.1       | Gorai.011G171000.1 | .                  | .                  | . | . |
| .                  | .                  | .                  | .                  | . | . |
| Vv07g0023          | Tc01_g005480       | Gorai.008G077900.1 | .                  | . | . |
| .                  | .                  | .                  | .                  | . | . |
| .                  | .                  | .                  | .                  | . | . |
| Vv07g0024          | Tc01_g005580       | Gorai.007G142800.1 | .                  | . | . |
| .                  | Gorai.004G247000.1 | .                  | .                  | . | . |
| .                  | .                  | .                  | .                  | . | . |
| Vv07g0025          | Gorai.007G142700.1 | .                  | .                  | . | . |
| Gorai.004G219200.1 | .                  | .                  | .                  | . | . |
| .                  | .                  | .                  | .                  | . | . |
| Vv07g0026          | .                  | .                  | .                  | . | . |
| .                  | .                  | .                  | .                  | . | . |
| Vv07g0027          | Gorai.007G142600.1 | .                  | .                  | . | . |
| .                  | .                  | .                  | .                  | . | . |
| Vv07g0028          | Gorai.007G142500.1 | .                  | .                  | . | . |
| Gorai.004G074300.1 | Vv05g0686          | .                  | .                  | . | . |
| .                  | .                  | .                  | .                  | . | . |
| Vv07g0029          | .                  | .                  | .                  | . | . |
| .                  | .                  | .                  | .                  | . | . |
| Vv07g0030          | .                  | .                  | Gorai.004G074400.1 | . | . |
| .                  | Vv05g0684          | Tc04_g024650       | .                  | . | . |
| Gorai.011G170800.1 | .                  | .                  | .                  | . | . |
| .                  | .                  | .                  | .                  | . | . |
| Vv07g0031          | Tc01_g029000       | Gorai.007G142400.1 | Gorai.             | . | . |
| 001G243400.1       | Gorai.004G074500.1 | Gorai.004G219100.1 | .                  | . | . |
| .                  | .                  | .                  | .                  | . | . |
| Vv07g0032          | Gorai.007G142300.1 | Gorai.001G243300.1 | .                  | . | . |
| .                  | Gorai.004G219000.1 | .                  | .                  | . | . |

|                    |           |                    |                    |                    |   |   |   |
|--------------------|-----------|--------------------|--------------------|--------------------|---|---|---|
| .                  | .         | .                  | .                  | .                  | . | . | . |
| .                  | .         | .                  | .                  | .                  | . | . | . |
| Vv07g0033          | .         | .                  | .                  | .                  | . | . | . |
| .                  | .         | .                  | .                  | .                  | . | . | . |
| Vv07g0034          | .         | .                  | .                  | .                  | . | . | . |
| .                  | .         | .                  | .                  | .                  | . | . | . |
| Vv07g0035          | .         | .                  | .                  | .                  | . | . | . |
| .                  | .         | .                  | .                  | .                  | . | . | . |
| Vv07g0036          | .         | .                  | .                  | .                  | . | . | . |
| .                  | .         | .                  | .                  | .                  | . | . | . |
| Vv07g0037          | .         | .                  | .                  | .                  | . | . | . |
| .                  | .         | .                  | .                  | .                  | . | . | . |
| Vv07g0038          | .         | .                  | .                  | .                  | . | . | . |
| .                  | .         | .                  | .                  | .                  | . | . | . |
| Vv07g0039          | .         | .                  | .                  | .                  | . | . | . |
| .                  | .         | .                  | .                  | .                  | . | . | . |
| Vv07g0040          | .         | .                  | Gorai.001G243200.1 | .                  | . | . | . |
| .                  | .         | .                  | .                  | .                  | . | . | . |
| Vv07g0041          | .         | Gorai.007G142200.1 | .                  | .                  | . | . | . |
| .                  | .         | .                  | .                  | .                  | . | . | . |
| Vv07g0042          | .         | .                  | .                  | .                  | . | . | . |
| .                  | .         | .                  | .                  | .                  | . | . | . |
| Vv07g0043          | .         | .                  | .                  | .                  | . | . | . |
| .                  | .         | .                  | .                  | .                  | . | . | . |
| Vv07g0044          | .         | Gorai.007G142100.1 | .                  | .                  | . | . | . |
| Gorai.004G074700.1 | .         | .                  | .                  | .                  | . | . | . |
| .                  | .         | .                  | .                  | .                  | . | . | . |
| Vv07g0045          | .         | .                  | Gorai.001G243000.1 | .                  | . | . | . |
| .                  | .         | .                  | .                  | .                  | . | . | . |
| Vv07g0046          | .         | Gorai.007G142000.1 | .                  | .                  | . | . | . |
| .                  | .         | .                  | .                  | .                  | . | . | . |
| Vv07g0047          | .         | .                  | .                  | .                  | . | . | . |
| .                  | .         | .                  | .                  | .                  | . | . | . |
| Vv07g0048          | .         | .                  | Gorai.001G242900.1 | .                  | . | . | . |
| .                  | Vv05g0680 | .                  | Tc04_g024600       | Gorai.006G246000.1 | . | . | . |

|                    |                    |                    |                    |   |
|--------------------|--------------------|--------------------|--------------------|---|
|                    | Gorai.005G046500.1 | .                  | Gorai.011G170700.1 | . |
| Vv07g0049          | .                  | Gorai.007G141900.1 | Gorai.001G242800.1 | . |
|                    | Gorai.004G075000.1 | .                  | Vv05g0679          | . |
| Tc04_g024590       | Gorai.006G245900.1 | Gorai.005G046400.1 | .                  | . |
|                    | .                  | .                  | .                  | . |
| Vv07g0050          | .                  | Gorai.001G242700.1 | .                  | . |
|                    | .                  | .                  | .                  | . |
| Vv07g0051          | .                  | Gorai.001G242600.1 | .                  | . |
| Gorai.004G056700.1 | .                  | .                  | .                  | . |
|                    | .                  | .                  | .                  | . |
| Vv07g0052          | Tc01_g028690       | Gorai.007G141800.1 | Gorai.             | . |
| 001G242500.1       | Gorai.004G075200.1 | Gorai.004G218900.1 | .                  | . |
|                    | .                  | .                  | .                  | . |
| Vv07g0053          | .                  | .                  | Gorai.             | . |
| 004G218800.1       | .                  | .                  | .                  | . |
| Vv07g0054          | Tc01_g005950       | .                  | .                  | . |
|                    | .                  | .                  | .                  | . |
| Vv07g0055          | .                  | .                  | .                  | . |
|                    | .                  | .                  | .                  | . |
| Vv07g0056          | .                  | Gorai.007G141500.1 | .                  | . |
| Gorai.004G075400.1 | Gorai.004G246700.1 | .                  | .                  | . |
|                    | .                  | .                  | .                  | . |
| Vv07g0057          | .                  | .                  | .                  | . |
|                    | .                  | .                  | .                  | . |
| Vv07g0058          | .                  | .                  | .                  | . |
|                    | .                  | .                  | .                  | . |
| Vv07g0059          | .                  | .                  | .                  | . |
|                    | .                  | .                  | .                  | . |
| Vv07g0060          | .                  | .                  | .                  | . |
|                    | .                  | .                  | .                  | . |
| Vv07g0061          | .                  | Gorai.007G141400.1 | .                  | . |
|                    | .                  | .                  | .                  | . |
| Vv07g0062          | .                  | .                  | .                  | . |
|                    | .                  | .                  | .                  | . |
| Vv07g0063          | .                  | Gorai.007G141200.1 | Gorai.001G242400.1 | . |

|                    |                    |                    |                    |   |        |   |   |
|--------------------|--------------------|--------------------|--------------------|---|--------|---|---|
| .                  | .                  | .                  | .                  | . | .      | . | . |
| .                  | .                  | .                  | .                  | . | .      | . | . |
| .                  | .                  | .                  | .                  | . | .      | . | . |
| Vv07g0064          | .                  | .                  | .                  | . | .      | . | . |
| .                  | .                  | .                  | .                  | . | .      | . | . |
| .                  | .                  | .                  | .                  | . | .      | . | . |
| Vv07g0065          | .                  | .                  | .                  | . | .      | . | . |
| .                  | .                  | .                  | .                  | . | .      | . | . |
| .                  | .                  | .                  | .                  | . | .      | . | . |
| Vv07g0066          | .                  | .                  | .                  | . | .      | . | . |
| .                  | .                  | .                  | .                  | . | .      | . | . |
| .                  | .                  | .                  | .                  | . | .      | . | . |
| Vv07g0067          | .                  | .                  | .                  | . | .      | . | . |
| .                  | .                  | .                  | .                  | . | .      | . | . |
| .                  | .                  | .                  | .                  | . | .      | . | . |
| Vv07g0068          | .                  | .                  | .                  | . | .      | . | . |
| Vv05g0665          | Tc04_g024460       | Gorai.006G245000.1 | .                  | . | .      | . | . |
| Gorai.006G069800.1 | Gorai.011G165200.1 | .                  | .                  | . | .      | . | . |
| .                  | .                  | .                  | .                  | . | .      | . | . |
| Vv07g0069          | .                  | .                  | .                  | . | .      | . | . |
| .                  | .                  | .                  | .                  | . | .      | . | . |
| .                  | .                  | .                  | .                  | . | .      | . | . |
| Vv07g0070          | .                  | Gorai.001G242200.1 | .                  | . | .      | . | . |
| Gorai.004G075500.1 | Gorai.004G218200.1 | Vv05g0662          | .                  | . | .      | . | . |
| Gorai.006G244800.1 | .                  | .                  | .                  | . | .      | . | . |
| .                  | .                  | .                  | .                  | . | .      | . | . |
| Vv07g0071          | .                  | .                  | .                  | . | Gorai. | . | . |
| 004G218100.1       | Vv05g0661          | Gorai.006G244400.1 | .                  | . | .      | . | . |
| .                  | Gorai.011G167200.1 | .                  | .                  | . | .      | . | . |
| .                  | .                  | .                  | .                  | . | .      | . | . |
| Vv07g0072          | .                  | Gorai.007G141000.1 | Gorai.001G242100.1 | . | .      | . | . |
| .                  | .                  | Gorai.004G244200.1 | .                  | . | .      | . | . |
| .                  | .                  | .                  | .                  | . | .      | . | . |
| .                  | .                  | .                  | .                  | . | .      | . | . |
| Vv07g0073          | .                  | Gorai.001G242000.1 | .                  | . | .      | . | . |
| .                  | .                  | .                  | .                  | . | .      | . | . |
| .                  | .                  | .                  | .                  | . | .      | . | . |
| Vv07g0074          | .                  | Gorai.007G140900.1 | Gorai.001G241900.1 | . | .      | . | . |
| .                  | Gorai.004G075700.1 | Gorai.004G241600.1 | .                  | . | .      | . | . |
| .                  | .                  | .                  | .                  | . | .      | . | . |
| .                  | .                  | .                  | .                  | . | .      | . | . |
| Vv07g0075          | .                  | Gorai.007G140600.1 | .                  | . | .      | . | . |
| Gorai.004G076100.1 | .                  | .                  | .                  | . | .      | . | . |
| .                  | .                  | .                  | .                  | . | .      | . | . |
| .                  | .                  | .                  | .                  | . | .      | . | . |
| Vv07g0076          | .                  | Gorai.007G140400.1 | .                  | . | .      | . | . |
| Gorai.004G076300.1 | .                  | Vv05g0654          | .                  | . | .      | . | . |
| Gorai.005G046100.1 | .                  | Gorai.011G166800.1 | .                  | . | .      | . | . |
| .                  | .                  | .                  | .                  | . | .      | . | . |
| Vv07g0077          | .                  | Gorai.001G239700.1 | .                  | . | .      | . | . |

|                    |                    |                    |              |   |        |   |
|--------------------|--------------------|--------------------|--------------|---|--------|---|
|                    | Gorai.004G217800.1 | .                  | .            | . | .      | . |
|                    | .                  | .                  | .            | . | .      | . |
| Vv07g0078          | Tc01_g028530       | Gorai.007G140300.1 | .            | . | .      | . |
|                    | Gorai.004G076400.1 | .                  | .            | . | .      | . |
|                    | .                  | .                  | .            | . | .      | . |
| Vv07g0079          | Tc01_g028520       | .                  | .            | . | .      | . |
| Gorai.004G217700.1 | .                  | .                  | .            | . | .      | . |
|                    | .                  | .                  | .            | . | .      | . |
| Vv07g0080          | Tc01_g028510       | .                  | .            | . | .      | . |
|                    | .                  | .                  | .            | . | .      | . |
|                    | .                  | .                  | .            | . | .      | . |
| Vv07g0081          | Tc01_g028480       | .                  | .            | . | .      | . |
|                    | .                  | .                  | .            | . | .      | . |
|                    | .                  | .                  | .            | . | .      | . |
| Vv07g0082          | Gorai.007G140000.1 | .                  | .            | . | .      | . |
|                    | .                  | .                  | .            | . | .      | . |
|                    | .                  | .                  | .            | . | .      | . |
| Vv07g0083          | Tc01_g028470       | .                  | .            | . | .      | . |
| Gorai.004G217600.1 | .                  | .                  | .            | . | .      | . |
|                    | .                  | .                  | .            | . | .      | . |
| Vv07g0084          | .                  | Gorai.004G056400.1 | .            | . | .      | . |
|                    | .                  | .                  | .            | . | .      | . |
|                    | .                  | .                  | .            | . | .      | . |
| Vv07g0085          | Tc01_g028460       | .                  | .            | . | .      | . |
| Vv05g0621          | Tc04_g024420       | Gorai.006G242900.1 | .            | . | .      | . |
| .                  | Gorai.011G168300.1 | Gorai.002G024500.1 | .            | . | .      | . |
|                    | .                  | .                  | .            | . | .      | . |
| Vv07g0086          | Tc01_g028430       | .                  | .            | . | Gorai. | . |
| 004G076600.1       | .                  | .                  | .            | . | .      | . |
| .                  | Vv18g0502          | Tc08_g008770       | .            | . | .      | . |
| Gorai.009G234900.1 | .                  | .                  | .            | . | .      | . |
| Vv07g0087          | Tc01_g028410       | Gorai.007G139800.1 | .            | . | .      | . |
| Gorai.004G076800.1 | .                  | .                  | .            | . | .      | . |
| .                  | .                  | Vv18g0477          | Tc08_g008870 | . | .      | . |
| .                  | .                  | Gorai.010G039600.1 | .            | . | .      | . |
| Vv07g0088          | Tc01_g028390       | Gorai.007G139600.1 | .            | . | .      | . |
| Gorai.004G076900.1 | .                  | Vv05g0614          | .            | . | .      | . |
| Tc04_g024340       | Gorai.006G242400.1 | .                  | .            | . | Gorai. | . |
| 011G168400.1       | .                  | .                  | .            | . | .      | . |
|                    | .                  | .                  | .            | . | .      | . |
| Vv07g0089          | Tc01_g028380       | .                  | .            | . | Gorai. | . |
| 004G056100.1       | .                  | .                  | .            | . | .      | . |
| .                  | Vv18g0466          | Tc08_g008980       | .            | . | .      | . |
| Gorai.009G236500.1 | .                  | Gorai.010G040100.1 | .            | . | .      | . |
| Vv07g0090          | .                  | .                  | .            | . | .      | . |
|                    | .                  | .                  | .            | . | .      | . |
|                    | .                  | .                  | .            | . | .      | . |
| Vv07g0091          | Tc01_g006240       | Gorai.008G080500.1 | .            | . | .      | . |



|              |                    |                    |   |   |                    |   |   |
|--------------|--------------------|--------------------|---|---|--------------------|---|---|
| .            | .                  | .                  | . | . | .                  | . | . |
| .            | .                  | .                  | . | . | .                  | . | . |
| Vv07g0092    | .                  | .                  | . | . | .                  | . | . |
| .            | .                  | .                  | . | . | .                  | . | . |
| Vv07g0093    | Tc01_g028370       | Gorai.007G139500.1 | . | . | .                  | . | . |
|              | Gorai.004G077000.1 | .                  | . | . | .                  | . | . |
| .            | .                  | .                  | . | . | .                  | . | . |
| .            | .                  | .                  | . | . | .                  | . | . |
| Vv07g0094    | Tc01_g028330       | .                  | . | . | Gorai.             | . | . |
| 004G077100.1 | Vv05g0610          | Tc04_g024310       | . | . | .                  | . | . |
| .            | .                  | .                  | . | . | .                  | . | . |
| .            | .                  | .                  | . | . | .                  | . | . |
| Vv07g0095    | .                  | .                  | . | . | .                  | . | . |
| .            | .                  | .                  | . | . | .                  | . | . |
| .            | .                  | .                  | . | . | .                  | . | . |
| Vv07g0096    | .                  | .                  | . | . | .                  | . | . |
| .            | .                  | .                  | . | . | .                  | . | . |
| .            | .                  | .                  | . | . | .                  | . | . |
| Vv07g0097    | .                  | .                  | . | . | Gorai.004G077300.1 | . | . |
| .            | .                  | .                  | . | . | .                  | . | . |
| .            | .                  | .                  | . | . | .                  | . | . |
| Vv07g0098    | .                  | .                  | . | . | .                  | . | . |
| .            | .                  | .                  | . | . | .                  | . | . |
| .            | .                  | .                  | . | . | .                  | . | . |
| Vv07g0099    | .                  | .                  | . | . | .                  | . | . |
| .            | .                  | .                  | . | . | .                  | . | . |
| .            | .                  | .                  | . | . | .                  | . | . |
| Vv07g0100    | .                  | .                  | . | . | .                  | . | . |
| .            | .                  | .                  | . | . | .                  | . | . |
| .            | .                  | .                  | . | . | .                  | . | . |
| Vv07g0101    | .                  | .                  | . | . | .                  | . | . |
| .            | .                  | .                  | . | . | .                  | . | . |
| .            | .                  | .                  | . | . | .                  | . | . |
| Vv07g0102    | .                  | .                  | . | . | .                  | . | . |
| .            | .                  | .                  | . | . | .                  | . | . |
| .            | .                  | .                  | . | . | .                  | . | . |
| Vv07g0103    | .                  | .                  | . | . | .                  | . | . |
| .            | .                  | .                  | . | . | .                  | . | . |
| .            | .                  | .                  | . | . | .                  | . | . |
| Vv07g0104    | .                  | .                  | . | . | .                  | . | . |
| .            | .                  | .                  | . | . | .                  | . | . |
| .            | .                  | .                  | . | . | .                  | . | . |
| Vv07g0105    | .                  | .                  | . | . | .                  | . | . |
| .            | .                  | .                  | . | . | .                  | . | . |
| .            | .                  | .                  | . | . | .                  | . | . |
| Vv07g0106    | .                  | .                  | . | . | .                  | . | . |
| .            | .                  | .                  | . | . | .                  | . | . |
| .            | .                  | .                  | . | . | .                  | . | . |
| Vv07g0107    | .                  | .                  | . | . | .                  | . | . |

|              |                    |                    |              |   |   |        |   |
|--------------|--------------------|--------------------|--------------|---|---|--------|---|
| .            | .                  | .                  | .            | . | . | .      | . |
| .            | .                  | .                  | .            | . | . | .      | . |
| Vv07g0108    | .                  | .                  | .            | . | . | .      | . |
| .            | .                  | .                  | .            | . | . | .      | . |
| .            | .                  | .                  | .            | . | . | .      | . |
| Vv07g0109    | .                  | .                  | .            | . | . | Gorai. | . |
| 004G217500.1 | .                  | .                  | .            | . | . | .      | . |
| .            | .                  | .                  | .            | . | . | .      | . |
| Vv07g0110    | Tc01_g028320       | .                  | .            | . | . | .      | . |
| .            | .                  | .                  | .            | . | . | .      | . |
| .            | .                  | .                  | .            | . | . | .      | . |
| Vv07g0111    | .                  | .                  | .            | . | . | .      | . |
| .            | .                  | .                  | .            | . | . | .      | . |
| .            | .                  | .                  | .            | . | . | .      | . |
| Vv07g0112    | .                  | .                  | .            | . | . | .      | . |
| .            | .                  | .                  | .            | . | . | .      | . |
| .            | .                  | .                  | .            | . | . | .      | . |
| Vv07g0113    | .                  | .                  | .            | . | . | .      | . |
| Vv05g0608    | Tc04_g024280       | .                  | .            | . | . | Gorai. | . |
| 011G170100.1 | .                  | .                  | .            | . | . | .      | . |
| .            | .                  | .                  | .            | . | . | .      | . |
| Vv07g0114    | Tc01_g028290       | .                  | .            | . | . | Gorai. | . |
| 004G056000.1 | Gorai.004G217400.1 | .                  | Vv05g0607    | . | . | .      | . |
| .            | .                  | .                  | .            | . | . | .      | . |
| .            | .                  | .                  | .            | . | . | .      | . |
| Vv07g0115    | Tc01_g028280       | .                  | .            | . | . | Gorai. | . |
| 004G077500.1 | .                  | Vv05g0606          | Tc04_g024260 | . | . | Gorai. | . |
| 006G242000.1 | Gorai.005G045200.1 | .                  | .            | . | . | .      | . |
| .            | .                  | .                  | .            | . | . | .      | . |
| Vv07g0116    | Tc01_g028270       | .                  | .            | . | . | .      | . |
| .            | .                  | .                  | .            | . | . | .      | . |
| .            | .                  | .                  | .            | . | . | .      | . |
| Vv07g0117    | Tc01_g028260       | .                  | .            | . | . | Gorai. | . |
| 004G077600.1 | .                  | .                  | .            | . | . | .      | . |
| .            | .                  | .                  | .            | . | . | .      | . |
| .            | .                  | .                  | .            | . | . | .      | . |
| Vv07g0118    | .                  | .                  | .            | . | . | .      | . |
| Vv05g0602    | Tc04_g024220       | .                  | .            | . | . | Gorai. | . |
| 011G167600.1 | .                  | .                  | .            | . | . | .      | . |
| .            | .                  | .                  | .            | . | . | .      | . |
| Vv07g0119    | .                  | .                  | .            | . | . | .      | . |
| .            | .                  | .                  | .            | . | . | .      | . |
| .            | .                  | .                  | .            | . | . | .      | . |
| Vv07g0120    | .                  | .                  | .            | . | . | .      | . |
| .            | .                  | .                  | .            | . | . | .      | . |
| .            | .                  | .                  | .            | . | . | .      | . |
| Vv07g0121    | Tc01_g028250       | Gorai.007G139400.1 | .            | . | . | .      | . |
| .            | .                  | Vv05g0599          | .            | . | . | .      | . |
| .            | .                  | .                  | .            | . | . | .      | . |
| .            | .                  | .                  | .            | . | . | .      | . |
| Vv07g0122    | Tc01_g028240       | Gorai.007G139300.1 | .            | . | . | .      | . |

|                    |                    |                    |              |
|--------------------|--------------------|--------------------|--------------|
|                    | Gorai.004G077700.1 | Gorai.004G217300.1 | Vv05g0596    |
|                    | Tc04_g024180       | Gorai.006G241600.1 | .            |
| Vv07g0123          | Tc01_g028230       | .                  | Gorai.       |
| 004G077800.1       | .                  | .                  | .            |
| .                  | Vv18g0429          | .                  | .            |
| .                  | .                  | .                  | .            |
| Vv07g0124          | Tc01_g028220       | Gorai.007G139200.1 | .            |
| .                  | .                  | .                  | .            |
| .                  | .                  | .                  | .            |
| Vv07g0125          | .                  | .                  | .            |
| .                  | .                  | .                  | .            |
| .                  | .                  | .                  | .            |
| Vv07g0126          | Tc01_g028210       | .                  | Gorai.       |
| 004G078000.1       | .                  | Vv05g0593          | Tc04_g024150 |
| Gorai.005G044600.1 | Gorai.006G067900.1 | .                  | .            |
| .                  | .                  | .                  | .            |
| Vv07g0127          | .                  | .                  | .            |
| .                  | .                  | .                  | .            |
| .                  | .                  | .                  | .            |
| Vv07g0128          | .                  | .                  | .            |
| .                  | .                  | .                  | .            |
| .                  | .                  | .                  | .            |
| Vv07g0129          | .                  | .                  | .            |
| .                  | .                  | .                  | .            |
| .                  | .                  | .                  | .            |
| Vv07g0130          | Tc01_g028180       | Gorai.007G139100.1 | .            |
|                    | Gorai.004G078100.1 | Gorai.004G217200.1 | Vv05g0585    |
|                    | Tc04_g024100       | Gorai.006G241200.1 | .            |
| Gorai.011G165500.1 | .                  | .                  | .            |
| .                  | .                  | .                  | .            |
| Vv07g0131          | .                  | .                  | .            |
| .                  | .                  | .                  | .            |
| .                  | .                  | .                  | .            |
| Vv07g0132          | .                  | .                  | .            |
| .                  | .                  | .                  | .            |
| .                  | .                  | .                  | .            |
| Vv07g0133          | Tc01_g028140       | .                  | Gorai.       |
| 004G055800.1       | .                  | .                  | .            |
| .                  | .                  | .                  | .            |
| Vv07g0134          | Tc01_g028120       | .                  | .            |
| .                  | .                  | .                  | .            |
| .                  | .                  | .                  | .            |
| Vv07g0135          | .                  | .                  | .            |
| .                  | .                  | .                  | .            |
| .                  | .                  | .                  | .            |
| Vv07g0136          | Tc01_g028110       | Gorai.007G138900.1 | .            |
| .                  | .                  | .                  | .            |
| .                  | .                  | .                  | .            |
| Vv07g0137          | Tc01_g028090       | .                  | .            |

|              |                    |                    |                    |   |   |   |   |
|--------------|--------------------|--------------------|--------------------|---|---|---|---|
| .            | .                  | .                  | .                  | . | . | . | . |
| .            | .                  | .                  | .                  | . | . | . | . |
| Vv07g0138    | Tc01_g028080       | .                  | .                  | . | . | . | . |
|              | Vv05g0583          | Tc04_g024040       | Gorai.006G240600.1 | . | . | . | . |
| .            | .                  | .                  | .                  | . | . | . | . |
| Vv07g0139    | .                  | .                  | .                  | . | . | . | . |
| .            | .                  | .                  | .                  | . | . | . | . |
| Vv07g0140    | .                  | .                  | .                  | . | . | . | . |
| .            | .                  | .                  | .                  | . | . | . | . |
| Vv07g0141    | .                  | .                  | .                  | . | . | . | . |
| .            | .                  | .                  | .                  | . | . | . | . |
| Vv07g0142    | Tc01_g028070       | .                  | .                  | . | . | . | . |
|              | Vv05g0582          | Tc04_g024030       | Gorai.006G240500.1 | . | . | . | . |
| .            | .                  | .                  | .                  | . | . | . | . |
| Vv07g0143    | Tc01_g028040       | Gorai.007G138700.1 | .                  | . | . | . | . |
| .            | .                  | .                  | .                  | . | . | . | . |
| Vv07g0144    | Tc01_g028030       | Gorai.007G138600.1 | .                  | . | . | . | . |
| .            | Gorai.004G216700.1 | Vv05g0581          | .                  | . | . | . | . |
| Tc04_g024020 | Gorai.006G240400.1 | .                  | .                  | . | . | . | . |
| .            | .                  | .                  | .                  | . | . | . | . |
| Vv07g0145    | .                  | .                  | .                  | . | . | . | . |
| .            | .                  | .                  | .                  | . | . | . | . |
| Vv07g0146    | Tc01_g028010       | .                  | .                  | . | . | . | . |
| .            | .                  | .                  | .                  | . | . | . | . |
| Vv07g0147    | .                  | .                  | .                  | . | . | . | . |
| .            | .                  | .                  | .                  | . | . | . | . |
| Vv07g0148    | .                  | .                  | .                  | . | . | . | . |
| .            | .                  | .                  | .                  | . | . | . | . |
| Vv07g0149    | .                  | .                  | .                  | . | . | . | . |
| Vv05g0567    | Tc04_g023920       | Gorai.006G239900.1 | .                  | . | . | . | . |
| .            | Gorai.002G024300.1 | .                  | .                  | . | . | . | . |
| .            | .                  | .                  | .                  | . | . | . | . |
| Vv07g0150    | Tc01_g027970       | Gorai.007G138200.1 | .                  | . | . | . | . |
|              | Gorai.004G078600.1 | Vv05g0559          | .                  | . | . | . | . |
| Tc04_g023830 | Gorai.005G043200.1 | .                  | .                  | . | . | . | . |
| .            | .                  | .                  | .                  | . | . | . | . |
| Vv07g0151    | .                  | .                  | .                  | . | . | . | . |
| .            | .                  | .                  | .                  | . | . | . | . |
| Vv07g0152    | .                  | .                  | .                  | . | . | . | . |

|                    |                    |                    |   |              |   |        |   |
|--------------------|--------------------|--------------------|---|--------------|---|--------|---|
| Vv05g0549          | .                  | .                  | . | .            | . | .      | . |
| .                  | .                  | .                  | . | .            | . | .      | . |
| Vv07g0153          | .                  | .                  | . | .            | . | .      | . |
| .                  | .                  | .                  | . | .            | . | .      | . |
| .                  | .                  | .                  | . | .            | . | .      | . |
| Vv07g0154          | Tc01_g027910       | .                  | . | .            | . | Gorai. | . |
| 004G078800.1       | .                  | Vv05g0546          | . | Tc04_g023730 | . | Gorai. | . |
| 006G239000.1       | Gorai.005G042800.1 | .                  | . | .            | . | .      | . |
| .                  | .                  | .                  | . | .            | . | .      | . |
| Vv07g0155          | .                  | .                  | . | .            | . | .      | . |
| .                  | .                  | .                  | . | .            | . | .      | . |
| .                  | .                  | .                  | . | .            | . | .      | . |
| Vv07g0156          | .                  | .                  | . | .            | . | .      | . |
| Vv05g0540          | Tc04_g023640       | Gorai.006G238700.1 | . | .            | . | Gorai. | . |
| 005G042300.1       | .                  | .                  | . | .            | . | .      | . |
| .                  | .                  | .                  | . | .            | . | .      | . |
| Vv07g0157          | Tc01_g027890       | .                  | . | .            | . | .      | . |
| .                  | .                  | .                  | . | .            | . | .      | . |
| .                  | .                  | .                  | . | .            | . | .      | . |
| Vv07g0158          | .                  | .                  | . | .            | . | .      | . |
| .                  | .                  | .                  | . | .            | . | .      | . |
| .                  | .                  | .                  | . | .            | . | .      | . |
| Vv07g0159          | Tc01_g027870       | Gorai.007G137800.1 | . | .            | . | .      | . |
| Gorai.004G079100.1 | .                  | Vv05g0538          | . | .            | . | .      | . |
| .                  | .                  | .                  | . | .            | . | .      | . |
| .                  | .                  | .                  | . | .            | . | .      | . |
| Vv07g0160          | Tc01_g027860       | Gorai.007G137700.1 | . | .            | . | .      | . |
| .                  | .                  | .                  | . | .            | . | .      | . |
| .                  | .                  | .                  | . | .            | . | .      | . |
| Vv07g0161          | Tc01_g027850       | .                  | . | .            | . | Gorai. | . |
| 004G055700.1       | .                  | .                  | . | .            | . | .      | . |
| .                  | .                  | .                  | . | .            | . | .      | . |
| Vv07g0162          | Tc01_g027840       | Gorai.007G137600.1 | . | .            | . | .      | . |
| .                  | Gorai.004G216500.1 | .                  | . | .            | . | .      | . |
| .                  | .                  | Vv18g0428          | . | Tc08_g009450 | . | .      | . |
| .                  | Gorai.009G282300.1 | .                  | . | .            | . | .      | . |
| Vv07g0163          | Tc01_g027810       | .                  | . | .            | . | Gorai. | . |
| 004G079200.1       | .                  | Vv05g0520          | . | Tc04_g023500 | . | .      | . |
| Gorai.005G042000.1 | .                  | .                  | . | .            | . | .      | . |
| .                  | .                  | .                  | . | .            | . | .      | . |
| Vv07g0164          | Tc01_g027800       | .                  | . | .            | . | Gorai. | . |
| 004G079300.1       | Gorai.004G216400.1 | .                  | . | .            | . | .      | . |
| .                  | .                  | .                  | . | .            | . | .      | . |
| .                  | .                  | .                  | . | .            | . | .      | . |
| Vv07g0165          | Tc01_g027790       | .                  | . | .            | . | Gorai. | . |
| 004G079400.1       | Gorai.004G216300.1 | .                  | . | .            | . | .      | . |
| .                  | .                  | .                  | . | .            | . | .      | . |
| .                  | .                  | .                  | . | .            | . | .      | . |
| Vv07g0166          | Tc01_g027780       | Gorai.007G137400.1 | . | .            | . | .      | . |
| Gorai.004G079500.1 | .                  | .                  | . | .            | . | .      | . |

|                    |                    |                    |   |   |        |   |   |
|--------------------|--------------------|--------------------|---|---|--------|---|---|
| .                  | .                  | .                  | . | . | .      | . | . |
| .                  | .                  | .                  | . | . | .      | . | . |
| Vv07g0167          | Tc01_g027750       | .                  | . | . | .      | . | . |
| Gorai.004G216200.1 | .                  | .                  | . | . | .      | . | . |
| .                  | .                  | .                  | . | . | .      | . | . |
| Vv07g0168          | .                  | .                  | . | . | .      | . | . |
| .                  | .                  | .                  | . | . | .      | . | . |
| Vv07g0169          | .                  | .                  | . | . | .      | . | . |
| .                  | .                  | .                  | . | . | .      | . | . |
| Vv07g0170          | Tc01_g027740       | .                  | . | . | .      | . | . |
| Vv05g0516          | Tc04_g023460       | Gorai.006G237700.1 | . | . | .      | . | . |
| .                  | .                  | .                  | . | . | .      | . | . |
| Vv07g0171          | .                  | .                  | . | . | .      | . | . |
| .                  | .                  | .                  | . | . | .      | . | . |
| Vv07g0172          | Tc01_g027640       | Gorai.007G137200.1 | . | . | .      | . | . |
| Gorai.004G079700.1 | .                  | Vv05g0514          | . | . | .      | . | . |
| Tc04_g023440       | Gorai.006G237500.1 | .                  | . | . | Gorai. | . | . |
| 011G169100.1       | .                  | .                  | . | . | .      | . | . |
| .                  | .                  | .                  | . | . | .      | . | . |
| Vv07g0173          | Tc01_g027620       | Gorai.007G137100.1 | . | . | .      | . | . |
| .                  | Gorai.004G216100.1 | .                  | . | . | .      | . | . |
| .                  | .                  | .                  | . | . | .      | . | . |
| Vv07g0174          | .                  | .                  | . | . | .      | . | . |
| .                  | .                  | .                  | . | . | .      | . | . |
| Vv07g0175          | .                  | .                  | . | . | .      | . | . |
| .                  | .                  | .                  | . | . | .      | . | . |
| Vv07g0176          | Tc01_g027610       | .                  | . | . | .      | . | . |
| .                  | .                  | .                  | . | . | .      | . | . |
| Vv07g0177          | Tc01_g027460       | .                  | . | . | .      | . | . |
| .                  | .                  | .                  | . | . | .      | . | . |
| Vv07g0178          | Tc01_g027450       | .                  | . | . | Gorai. | . | . |
| 004G081100.1       | .                  | .                  | . | . | .      | . | . |
| .                  | .                  | .                  | . | . | .      | . | . |
| Vv07g0179          | Tc01_g027440       | Gorai.007G136500.1 | . | . | .      | . | . |
| Gorai.004G081200.1 | .                  | .                  | . | . | .      | . | . |
| .                  | .                  | .                  | . | . | .      | . | . |
| Vv07g0180          | .                  | .                  | . | . | .      | . | . |
| .                  | .                  | .                  | . | . | .      | . | . |
| Vv07g0181          | Tc01_g027430       | Gorai.007G136400.1 | . | . | .      | . | . |

|              |                    |                    |                    |        |   |
|--------------|--------------------|--------------------|--------------------|--------|---|
| .            | Gorai.004G215900.1 | .                  | .                  | .      | . |
| .            | .                  | .                  | .                  | .      | . |
| .            | .                  | .                  | .                  | .      | . |
| Vv07g0182    | Tc01_g027400       | Gorai.007G136100.1 | .                  | .      | . |
|              | Gorai.004G081400.1 | .                  | .                  | .      | . |
| .            | .                  | .                  | .                  | .      | . |
| .            | .                  | .                  | .                  | .      | . |
| Vv07g0183    | .                  | .                  | .                  | .      | . |
| Vv05g0478    | Tc04_g023070       | Gorai.005G041100.1 | .                  | .      | . |
| .            | .                  | .                  | .                  | .      | . |
| .            | .                  | .                  | .                  | .      | . |
| Vv07g0184    | Gorai.007G135800.1 | .                  | .                  | .      | . |
| .            | .                  | .                  | .                  | .      | . |
| .            | .                  | .                  | .                  | .      | . |
| Vv07g0185    | .                  | .                  | .                  | .      | . |
| .            | .                  | .                  | .                  | .      | . |
| .            | .                  | .                  | .                  | .      | . |
| Vv07g0186    | .                  | .                  | .                  | Gorai. | . |
| 004G242500.1 | Vv05g0468          | Tc04_g022990       | .                  | .      | . |
| .            | Vv18g0419          | Tc08_g009580       | .                  | .      | . |
| .            | .                  | .                  | .                  | .      | . |
| Vv07g0187    | .                  | .                  | Gorai.004G081800.1 | .      | . |
|              | Gorai.004G242400.1 | Vv05g0467          | Tc04_g022970       | .      | . |
| .            | .                  | .                  | .                  | .      | . |
| .            | .                  | .                  | .                  | .      | . |
| Vv07g0188    | .                  | .                  | Gorai.004G081900.1 | .      | . |
| .            | .                  | .                  | .                  | .      | . |
| .            | .                  | .                  | .                  | .      | . |
| Vv07g0189    | .                  | .                  | .                  | .      | . |
| .            | .                  | .                  | .                  | .      | . |
| .            | .                  | .                  | .                  | .      | . |
| Vv07g0190    | Tc01_g028660       | .                  | .                  | Gorai. | . |
| 004G082000.1 | .                  | .                  | .                  | .      | . |
| .            | .                  | .                  | .                  | .      | . |
| .            | .                  | .                  | .                  | .      | . |
| Vv07g0191    | .                  | .                  | .                  | .      | . |
| .            | .                  | .                  | .                  | .      | . |
| .            | .                  | .                  | .                  | .      | . |
| Vv07g0192    | Tc01_g028670       | .                  | .                  | Gorai. | . |
| 004G082200.1 | .                  | .                  | .                  | .      | . |
| .            | .                  | .                  | .                  | .      | . |
| .            | .                  | .                  | .                  | .      | . |
| Vv07g0193    | .                  | .                  | .                  | .      | . |
| .            | .                  | .                  | .                  | .      | . |
| .            | .                  | .                  | .                  | .      | . |
| Vv07g0194    | Tc01_g028680       | .                  | .                  | Gorai. | . |
| 004G082300.1 | .                  | .                  | .                  | .      | . |
| .            | .                  | .                  | .                  | .      | . |
| .            | .                  | .                  | .                  | .      | . |
| Vv07g0195    | .                  | .                  | .                  | .      | . |
| .            | .                  | .                  | .                  | .      | . |
| .            | .                  | .                  | .                  | .      | . |
| Vv07g0196    | Gorai.007G135500.1 | .                  | .                  | .      | . |

|                    |                    |                    |                    |        |   |
|--------------------|--------------------|--------------------|--------------------|--------|---|
| .                  | Vv05g0461          | Tc04_g022870       | Gorai.006G217400.1 | .      | . |
| .                  | Gorai.006G053600.1 | .                  | .                  | .      | . |
| .                  | .                  | .                  | .                  | .      | . |
| Vv07g0197          | Tc01_g028710       | Gorai.007G135400.1 | .                  | .      | . |
| .                  | Gorai.004G082600.1 | .                  | Vv05g0456          | .      | . |
| .                  | .                  | .                  | .                  | .      | . |
| Vv07g0198          | .                  | .                  | .                  | .      | . |
| .                  | .                  | .                  | .                  | .      | . |
| .                  | .                  | .                  | .                  | .      | . |
| Vv07g0199          | Tc01_g028730       | .                  | .                  | Gorai. | . |
| 004G055400.1       | .                  | Vv05g0454          | Tc04_g022810       | .      | . |
| Gorai.005G040600.1 | .                  | Gorai.011G170300.1 | .                  | .      | . |
| .                  | .                  | .                  | .                  | .      | . |
| Vv07g0200          | .                  | .                  | .                  | .      | . |
| .                  | .                  | .                  | .                  | .      | . |
| .                  | .                  | .                  | .                  | .      | . |
| Vv07g0201          | .                  | .                  | .                  | .      | . |
| .                  | .                  | .                  | .                  | .      | . |
| .                  | .                  | .                  | .                  | .      | . |
| Vv07g0202          | Tc01_g028740       | .                  | .                  | .      | . |
| Gorai.004G215600.1 | .                  | .                  | .                  | .      | . |
| .                  | .                  | .                  | .                  | .      | . |
| Vv07g0203          | Tc01_g028750       | .                  | .                  | Gorai. | . |
| 004G083200.1       | Gorai.004G215500.1 | .                  | .                  | .      | . |
| .                  | .                  | .                  | .                  | .      | . |
| .                  | .                  | .                  | .                  | .      | . |
| Vv07g0204          | .                  | Gorai.007G135000.1 | .                  | .      | . |
| .                  | .                  | .                  | .                  | .      | . |
| .                  | .                  | .                  | .                  | .      | . |
| Vv07g0205          | Tc01_g028760       | Gorai.007G134800.1 | .                  | .      | . |
| .                  | .                  | .                  | .                  | .      | . |
| .                  | .                  | .                  | .                  | .      | . |
| Vv07g0206          | Tc01_g028790       | .                  | .                  | .      | . |
| Gorai.004G215400.1 | .                  | .                  | .                  | .      | . |
| .                  | .                  | .                  | .                  | .      | . |
| Vv07g0207          | Tc01_g028800       | Gorai.007G134700.1 | .                  | .      | . |
| .                  | Gorai.004G055300.1 | .                  | .                  | .      | . |
| .                  | .                  | .                  | .                  | .      | . |
| .                  | .                  | .                  | .                  | .      | . |
| Vv07g0208          | Tc01_g028810       | Gorai.007G134600.1 | .                  | .      | . |
| .                  | .                  | .                  | .                  | .      | . |
| .                  | .                  | .                  | .                  | .      | . |
| Vv07g0209          | Tc01_g028820       | .                  | .                  | Gorai. | . |
| 004G083400.1       | .                  | .                  | .                  | .      | . |
| .                  | .                  | .                  | .                  | .      | . |
| .                  | .                  | .                  | .                  | .      | . |
| Vv07g0210          | Tc01_g028830       | Gorai.007G134500.1 | .                  | .      | . |
| .                  | Gorai.004G055200.1 | .                  | Vv05g0450          | .      | . |
| Tc04_g022760       | .                  | Gorai.005G040400.1 | .                  | .      | . |
| .                  | .                  | .                  | .                  | .      | . |



|                    |              |                    |   |        |
|--------------------|--------------|--------------------|---|--------|
| Vv07g0211          | Tc01_g028840 | Gorai.007G134400.1 | . | .      |
| .                  | .            | .                  | . | .      |
| .                  | .            | .                  | . | .      |
| Vv07g0212          | .            | .                  | . | .      |
| .                  | .            | .                  | . | .      |
| .                  | .            | .                  | . | .      |
| Vv07g0213          | .            | .                  | . | .      |
| .                  | .            | .                  | . | .      |
| .                  | .            | .                  | . | .      |
| Vv07g0214          | .            | .                  | . | .      |
| .                  | .            | .                  | . | .      |
| .                  | .            | .                  | . | .      |
| Vv07g0215          | .            | .                  | . | .      |
| Vv05g0448          | Tc04_g022730 | Gorai.005G040200.1 | . | .      |
| .                  | .            | .                  | . | .      |
| .                  | .            | .                  | . | .      |
| Vv07g0216          | .            | .                  | . | .      |
| Vv05g0447          | Tc04_g022720 | Gorai.005G040100.1 | . | .      |
| .                  | .            | .                  | . | .      |
| .                  | .            | .                  | . | .      |
| Vv07g0217          | .            | .                  | . | .      |
| .                  | .            | .                  | . | .      |
| .                  | .            | .                  | . | .      |
| Vv07g0218          | .            | .                  | . | Gorai. |
| 004G241600.1       | .            | .                  | . | .      |
| Vv14g0364          | .            | .                  | . | Gorai. |
| 007G342600.1       | .            | .                  | . | .      |
| Vv07g0219          | .            | .                  | . | .      |
| .                  | .            | .                  | . | .      |
| .                  | .            | .                  | . | .      |
| Vv07g0220          | .            | .                  | . | .      |
| .                  | .            | .                  | . | .      |
| .                  | .            | .                  | . | .      |
| Vv07g0221          | .            | .                  | . | .      |
| .                  | .            | .                  | . | .      |
| .                  | .            | .                  | . | .      |
| Vv07g0222          | .            | .                  | . | .      |
| .                  | .            | .                  | . | .      |
| .                  | .            | .                  | . | .      |
| Vv07g0223          | .            | .                  | . | .      |
| .                  | .            | .                  | . | .      |
| .                  | .            | .                  | . | .      |
| Vv07g0224          | .            | .                  | . | .      |
| .                  | .            | .                  | . | .      |
| .                  | .            | .                  | . | .      |
| Vv07g0225          | .            | .                  | . | .      |
| .                  | .            | .                  | . | .      |
| .                  | .            | .                  | . | .      |
| Vv07g0226          | Tc01_g028860 | Gorai.007G134200.1 | . | .      |
| Gorai.004G083500.1 | .            | .                  | . | .      |

|              |                    |                    |              |        |
|--------------|--------------------|--------------------|--------------|--------|
| Vv07g0227    | Tc01_g028870       | Gorai.007G134100.1 | .            | .      |
|              | Gorai.004G055100.1 | Gorai.004G215300.1 | Vv05g0444    | .      |
|              | Tc04_g022670       | .                  | .            | .      |
| Vv07g0228    | .                  | .                  | .            | .      |
| Vv07g0229    | .                  | .                  | .            | .      |
| Vv07g0230    | .                  | .                  | .            | .      |
| Vv07g0231    | .                  | .                  | .            | .      |
| Vv07g0232    | Tc01_g028880       | Gorai.007G133800.1 | .            | .      |
| Vv07g0233    | Tc01_g028890       | .                  | .            | .      |
| Vv07g0234    | .                  | .                  | .            | .      |
| Vv05g0440    | Tc04_g022630       | Gorai.006G218100.1 | .            | .      |
| Vv07g0235    | Tc01_g028910       | .                  | .            | .      |
| Vv07g0236    | Tc01_g028920       | Gorai.007G133700.1 | .            | .      |
|              | Gorai.004G054800.1 | Vv14g0389          | Tc04_g025620 | .      |
|              |                    | Gorai.006G053800.1 | .            | .      |
| Vv07g0237    | Tc01_g028940       | Gorai.007G133500.1 | .            | .      |
|              | Gorai.004G083800.1 | .                  | .            | .      |
| Vv07g0238    | Tc01_g028950       | .                  | .            | Gorai. |
| 004G083900.1 | Vv05g0435          | .                  | .            | .      |
| Vv07g0239    | Tc01_g029000       | Gorai.007G133400.1 | .            | .      |
|              | Vv05g0431          | .                  | .            | .      |
|              | Gorai.011G181200.1 | .                  | .            | .      |
| Vv07g0240    | .                  | .                  | .            | .      |

|                    |                    |                    |   |   |   |        |   |
|--------------------|--------------------|--------------------|---|---|---|--------|---|
| Vv07g0241          | .                  | .                  | . | . | . | .      | . |
| .                  | .                  | .                  | . | . | . | .      | . |
| Vv07g0242          | Tc01_g029020       | .                  | . | . | . | .      | . |
| .                  | .                  | .                  | . | . | . | .      | . |
| Vv07g0243          | .                  | .                  | . | . | . | .      | . |
| .                  | .                  | .                  | . | . | . | .      | . |
| Vv07g0244          | Tc01_g029030       | .                  | . | . | . | Gorai. | . |
| 004G084100.1       | .                  | .                  | . | . | . | .      | . |
| Vv07g0245          | Tc01_g029040       | .                  | . | . | . | Gorai. | . |
| 004G084200.1       | .                  | .                  | . | . | . | .      | . |
| Vv07g0246          | Tc01_g029050       | Gorai.007G133300.1 | . | . | . | .      | . |
| .                  | Gorai.004G215100.1 | .                  | . | . | . | .      | . |
| .                  | .                  | Vv14g0416          | . | . | . | Gorai. | . |
| 013G123400.1       | Gorai.007G133300.1 | .                  | . | . | . | Gorai. | . |
| 004G215100.1       | .                  | .                  | . | . | . | .      | . |
| Vv07g0247          | .                  | .                  | . | . | . | .      | . |
| .                  | .                  | .                  | . | . | . | .      | . |
| Vv07g0248          | .                  | .                  | . | . | . | .      | . |
| .                  | .                  | .                  | . | . | . | .      | . |
| Vv07g0249          | .                  | .                  | . | . | . | .      | . |
| .                  | .                  | .                  | . | . | . | .      | . |
| Vv07g0250          | Tc01_g029110       | Gorai.007G133200.1 | . | . | . | .      | . |
| .                  | Gorai.004G215000.1 | Vv05g0422          | . | . | . | .      | . |
| .                  | Gorai.011G182000.1 | .                  | . | . | . | .      | . |
| Vv07g0251          | Tc01_g029120       | .                  | . | . | . | .      | . |
| Gorai.004G214900.1 | .                  | .                  | . | . | . | .      | . |
| Vv07g0252          | .                  | .                  | . | . | . | .      | . |
| .                  | .                  | .                  | . | . | . | .      | . |
| Vv07g0253          | .                  | .                  | . | . | . | .      | . |
| .                  | .                  | .                  | . | . | . | .      | . |
| Vv07g0254          | .                  | .                  | . | . | . | .      | . |
| .                  | .                  | .                  | . | . | . | .      | . |
| Vv07g0255          | Tc01_g029130       | .                  | . | . | . | Gorai. | . |
| 004G084300.1       | .                  | .                  | . | . | . | .      | . |
| Vv07g0256          | Tc01_g029150       | .                  | . | . | . | .      | . |
| .                  | .                  | .                  | . | . | . | .      | . |

|                    |                    |                    |   |                    |   |   |
|--------------------|--------------------|--------------------|---|--------------------|---|---|
| Vv07g0257          | Tc01_g029160       | .                  | . | .                  | . | . |
| .                  | .                  | .                  | . | .                  | . | . |
| Vv07g0258          | Tc01_g029170       | .                  | . | .                  | . | . |
| .                  | .                  | .                  | . | .                  | . | . |
| Vv14g0440          | .                  | Gorai.007G291800.1 | . | Gorai.             | . | . |
| 013G203700.1       | .                  | .                  | . | .                  | . | . |
| Vv07g0259          | Tc01_g029180       | Gorai.007G132900.1 | . | .                  | . | . |
| .                  | .                  | Vv05g0414          | . | Gorai.006G256600.1 | . | . |
| .                  | .                  | Gorai.011G182900.1 | . | Vv14g0441          | . | . |
| Tc04_g027120       | .                  | Gorai.007G291700.1 | . | Gorai.             | . | . |
| 007G132900.1       | .                  | .                  | . | .                  | . | . |
| Vv07g0260          | Tc01_g029190       | .                  | . | Gorai.             | . | . |
| 004G084400.1       | .                  | .                  | . | .                  | . | . |
| .                  | .                  | .                  | . | .                  | . | . |
| Vv07g0261          | Tc01_g029200       | .                  | . | Gorai.             | . | . |
| 004G084500.1       | .                  | .                  | . | .                  | . | . |
| .                  | .                  | .                  | . | .                  | . | . |
| Vv07g0262          | .                  | .                  | . | .                  | . | . |
| .                  | .                  | .                  | . | .                  | . | . |
| Vv07g0263          | Tc01_g029210       | .                  | . | Gorai.             | . | . |
| 004G084600.1       | .                  | .                  | . | .                  | . | . |
| .                  | .                  | .                  | . | .                  | . | . |
| Vv07g0264          | Tc01_g029220       | Gorai.007G132800.1 | . | .                  | . | . |
| .                  | Gorai.004G214300.1 | .                  | . | .                  | . | . |
| .                  | .                  | Vv14g0444          | . | .                  | . | . |
| Gorai.007G132800.1 | .                  | Gorai.004G214300.1 | . | .                  | . | . |
| Vv07g0265          | Tc01_g029240       | .                  | . | .                  | . | . |
| Gorai.004G214200.1 | .                  | .                  | . | .                  | . | . |
| .                  | .                  | .                  | . | .                  | . | . |
| Vv07g0266          | .                  | .                  | . | Gorai.004G084700.1 | . | . |
| Gorai.004G214100.1 | .                  | .                  | . | .                  | . | . |
| .                  | .                  | .                  | . | .                  | . | . |
| Vv07g0267          | Tc01_g029250       | .                  | . | .                  | . | . |
| Gorai.004G239900.1 | .                  | .                  | . | .                  | . | . |
| .                  | Vv14g0446          | .                  | . | Gorai.007G291200.1 | . | . |
| .                  | Gorai.004G214100.1 | .                  | . | .                  | . | . |
| Vv07g0268          | .                  | .                  | . | .                  | . | . |
| .                  | .                  | .                  | . | .                  | . | . |
| Vv07g0269          | .                  | .                  | . | .                  | . | . |
| .                  | .                  | .                  | . | .                  | . | . |
| Vv07g0270          | .                  | .                  | . | .                  | . | . |
| .                  | .                  | .                  | . | .                  | . | . |
| Vv07g0271          | .                  | .                  | . | .                  | . | . |

|                    |                    |                    |   |   |   |           |   |
|--------------------|--------------------|--------------------|---|---|---|-----------|---|
| .                  | .                  | .                  | . | . | . | .         | . |
| .                  | .                  | .                  | . | . | . | .         | . |
| Vv07g0272          | Tc01_g029280       | .                  | . | . | . | .         | . |
| .                  | .                  | .                  | . | . | . | .         | . |
| .                  | .                  | .                  | . | . | . | .         | . |
| Vv07g0273          | .                  | Gorai.007G132700.1 | . | . | . | .         | . |
| Gorai.004G054500.1 | .                  | Gorai.004G239200.1 | . | . | . | .         | . |
| .                  | .                  | .                  | . | . | . | .         | . |
| .                  | .                  | .                  | . | . | . | .         | . |
| Vv07g0274          | .                  | .                  | . | . | . | .         | . |
| .                  | .                  | .                  | . | . | . | .         | . |
| .                  | .                  | .                  | . | . | . | .         | . |
| Vv07g0275          | .                  | .                  | . | . | . | .         | . |
| .                  | .                  | .                  | . | . | . | .         | . |
| .                  | .                  | .                  | . | . | . | .         | . |
| Vv07g0276          | Tc01_g029300       | .                  | . | . | . | Gorai.    | . |
| 004G054300.1       | .                  | .                  | . | . | . | .         | . |
| .                  | .                  | .                  | . | . | . | .         | . |
| Vv07g0277          | Tc01_g029310       | Gorai.007G132500.1 | . | . | . | .         | . |
| .                  | .                  | .                  | . | . | . | .         | . |
| .                  | .                  | .                  | . | . | . | .         | . |
| Vv07g0278          | Tc01_g029320       | .                  | . | . | . | .         | . |
| Gorai.004G139800.1 | .                  | .                  | . | . | . | .         | . |
| .                  | .                  | .                  | . | . | . | .         | . |
| Vv07g0279          | Tc01_g029350       | .                  | . | . | . | .         | . |
| .                  | .                  | .                  | . | . | . | .         | . |
| .                  | .                  | .                  | . | . | . | .         | . |
| Vv07g0280          | Tc01_g029360       | Gorai.007G132400.1 | . | . | . | .         | . |
| Gorai.004G084800.1 | .                  | Gorai.004G140000.1 | . | . | . | .         | . |
| .                  | .                  | .                  | . | . | . | .         | . |
| .                  | .                  | .                  | . | . | . | .         | . |
| Vv07g0281          | .                  | .                  | . | . | . | .         | . |
| .                  | .                  | .                  | . | . | . | .         | . |
| .                  | .                  | .                  | . | . | . | .         | . |
| Vv07g0282          | Tc01_g029380       | Gorai.007G132300.1 | . | . | . | .         | . |
| .                  | .                  | .                  | . | . | . | .         | . |
| .                  | .                  | .                  | . | . | . | .         | . |
| Vv07g0283          | Tc01_g029390       | .                  | . | . | . | Gorai.    | . |
| 004G054200.1       | .                  | .                  | . | . | . | .         | . |
| .                  | .                  | .                  | . | . | . | .         | . |
| Vv07g0284          | .                  | .                  | . | . | . | .         | . |
| .                  | .                  | .                  | . | . | . | .         | . |
| .                  | .                  | .                  | . | . | . | .         | . |
| Vv07g0285          | .                  | .                  | . | . | . | .         | . |
| .                  | .                  | .                  | . | . | . | Vv14g0471 | . |
| .                  | Gorai.013G116000.1 | .                  | . | . | . | .         | . |
| Vv07g0286          | .                  | .                  | . | . | . | .         | . |
| .                  | .                  | .                  | . | . | . | .         | . |
| .                  | .                  | .                  | . | . | . | .         | . |
| Vv07g0287          | Tc01_g029430       | .                  | . | . | . | Gorai.    | . |

|              |                    |                    |   |   |   |           |   |
|--------------|--------------------|--------------------|---|---|---|-----------|---|
| 004G085300.1 | .                  | .                  | . | . | . | .         | . |
| Vv07g0288    | Tc01_g029450       | Gorai.007G131900.1 | . | . | . | .         | . |
|              | Gorai.004G085400.1 | .                  | . | . | . | .         | . |
| Vv07g0289    | Tc01_g029510       | .                  | . | . | . | .         | . |
| Vv07g0290    | .                  | .                  | . | . | . | Gorai.    | . |
| 004G140200.1 | .                  | .                  | . | . | . | .         | . |
| Vv07g0291    | Tc01_g029530       | .                  | . | . | . | Gorai.    | . |
| 004G085500.1 | .                  | .                  | . | . | . | .         | . |
| Vv07g0292    | .                  | .                  | . | . | . | .         | . |
| Vv07g0293    | Tc01_g029550       | Gorai.007G131700.1 | . | . | . | .         | . |
|              | Gorai.004G085700.1 | Gorai.004G140400.1 | . | . | . | .         | . |
| Vv07g0294    | Tc01_g029560       | .                  | . | . | . | .         | . |
|              | Vv05g0389          | Gorai.006G257200.1 | . | . | . | Gorai.    | . |
| 005G057100.1 | Gorai.006G075200.1 | .                  | . | . | . | Vv14g0482 | . |
| Vv07g0295    | Tc01_g029580       | Gorai.007G131500.1 | . | . | . | .         | . |
|              | Gorai.004G085800.1 | .                  | . | . | . | .         | . |
|              | Gorai.005G057200.1 | Gorai.006G075400.1 | . | . | . | Gorai.    | . |
| 011G185600.1 | .                  | .                  | . | . | . | .         | . |
| Vv07g0296    | .                  | .                  | . | . | . | .         | . |
| Vv07g0297    | .                  | .                  | . | . | . | .         | . |
| Vv07g0298    | Tc01_g029600       | Gorai.007G131300.1 | . | . | . | .         | . |
|              | Gorai.004G053500.1 | Gorai.004G140500.1 | . | . | . | .         | . |
| Vv07g0299    | Tc01_g029630       | Gorai.007G131200.1 | . | . | . | .         | . |
| Vv07g0300    | Tc01_g029640       | .                  | . | . | . | Gorai.    | . |
| 004G086000.1 | .                  | .                  | . | . | . | .         | . |
| Vv07g0301    | Tc01_g029680       | Gorai.007G131100.1 | . | . | . | .         | . |
|              | Vv05g0373          | Gorai.006G257500.1 | . | . | . | .         | . |
|              | Gorai.005G057400.1 | .                  | . | . | . | .         | . |

|                    |                    |                    |   |   |   |        |
|--------------------|--------------------|--------------------|---|---|---|--------|
| Vv07g0302          | Tc01_g029690       | .                  | . | . | . | .      |
| Gorai.004G140600.1 | .                  | .                  | . | . | . | .      |
| Vv07g0303          | Tc01_g029700       | .                  | . | . | . | Gorai. |
| 004G086200.1       | Vv05g0370          | .                  | . | . | . | Gorai. |
| 005G057600.1       | Gorai.011G186700.1 | .                  | . | . | . | .      |
| Vv07g0304          | .                  | .                  | . | . | . | .      |
| .                  | .                  | .                  | . | . | . | .      |
| Vv07g0305          | .                  | .                  | . | . | . | .      |
| .                  | .                  | .                  | . | . | . | .      |
| Vv07g0306          | Tc01_g029720       | Gorai.007G130900.1 | . | . | . | .      |
| .                  | Gorai.004G140800.1 | Vv05g0366          | . | . | . | .      |
| Tc04_g001350       | Gorai.005G058500.1 | .                  | . | . | . | Gorai. |
| 011G187200.1       | .                  | .                  | . | . | . | .      |
| Vv07g0307          | Tc01_g029730       | Gorai.007G130800.1 | . | . | . | .      |
| Gorai.004G086400.1 | Gorai.004G140900.1 | Vv05g0365          | . | . | . | .      |
| .                  | Gorai.005G058600.1 | Gorai.             | . | . | . | .      |
| 011G187300.1       | .                  | .                  | . | . | . | .      |
| Vv07g0308          | Tc01_g029740       | .                  | . | . | . | .      |
| Gorai.004G141000.1 | .                  | .                  | . | . | . | .      |
| Vv07g0309          | Tc01_g029770       | Gorai.007G130700.1 | . | . | . | .      |
| Gorai.004G086500.1 | Gorai.004G141100.1 | .                  | . | . | . | .      |
| .                  | .                  | .                  | . | . | . | .      |
| Vv07g0310          | .                  | .                  | . | . | . | .      |
| .                  | .                  | .                  | . | . | . | .      |
| Vv07g0311          | Tc01_g029790       | Gorai.007G130600.1 | . | . | . | .      |
| Gorai.004G086600.1 | .                  | .                  | . | . | . | .      |
| .                  | .                  | .                  | . | . | . | .      |
| Vv07g0312          | Tc01_g029810       | Gorai.007G130500.1 | . | . | . | .      |
| Gorai.004G053200.1 | Vv05g0355          | .                  | . | . | . | .      |
| Gorai.005G058800.1 | Gorai.011G188400.1 | .                  | . | . | . | .      |
| Gorai.002G027000.1 | .                  | .                  | . | . | . | .      |
| Vv07g0313          | Tc01_g029830       | .                  | . | . | . | .      |
| Gorai.004G236800.1 | .                  | .                  | . | . | . | .      |
| Vv07g0314          | Tc01_g029840       | Gorai.007G130400.1 | . | . | . | .      |
| .                  | .                  | .                  | . | . | . | .      |
| Vv07g0315          | .                  | .                  | . | . | . | Gorai. |

|                    |                    |                    |              |   |   |        |   |
|--------------------|--------------------|--------------------|--------------|---|---|--------|---|
| 004G233900.1       | .                  | .                  | .            | . | . | .      | . |
| Vv07g0316          | .                  | .                  | .            | . | . | .      | . |
| Vv07g0317          | Tc01_g029850       | .                  | .            | . | . | .      | . |
| Gorai.004G141300.1 | .                  | .                  | .            | . | . | .      | . |
| Vv07g0318          | .                  | .                  | .            | . | . | .      | . |
| Vv07g0319          | .                  | .                  | .            | . | . | .      | . |
| Vv07g0320          | .                  | .                  | .            | . | . | .      | . |
| Vv07g0321          | .                  | .                  | .            | . | . | .      | . |
| Vv07g0322          | .                  | .                  | .            | . | . | .      | . |
| Vv07g0323          | .                  | .                  | .            | . | . | .      | . |
| Vv07g0324          | Tc01_g029880       | .                  | .            | . | . | Gorai. | . |
| 004G088000.1       | Gorai.004G141400.1 | .                  | .            | . | . | .      | . |
| Vv07g0325          | Gorai.007G130300.1 | .                  | .            | . | . | .      | . |
| Gorai.004G053100.1 | Vv14g0314          | .                  | .            | . | . | .      | . |
| Gorai.007G130300.1 | .                  | .                  | .            | . | . | .      | . |
| Vv07g0326          | .                  | .                  | .            | . | . | .      | . |
| Vv07g0327          | .                  | .                  | .            | . | . | .      | . |
| Vv07g0328          | Tc01_g029920       | Gorai.007G130100.1 | .            | . | . | .      | . |
| Gorai.004G088400.1 | .                  | .                  | .            | . | . | .      | . |
| Gorai.007G298600.1 | .                  | Vv14g0268          | .            | . | . | .      | . |
| Vv07g0329          | Tc01_g029930       | Gorai.007G130000.1 | .            | . | . | .      | . |
| Gorai.004G053000.1 | .                  | .                  | .            | . | . | .      | . |
| Gorai.013G124900.1 | .                  | Vv14g0286          | Tc04_g027920 | . | . | .      | . |
| Vv07g0330          | Tc01_g029960       | Gorai.007G129900.1 | .            | . | . | .      | . |
| .                  | Gorai.004G141600.1 | .                  | .            | . | . | .      | . |



|           |                    |                    |                    |   |
|-----------|--------------------|--------------------|--------------------|---|
| .         | .                  | Vv14g0288          | Tc04_g027900       | . |
| .         | Gorai.007G129900.1 | Gorai.011G189100.1 | .                  | . |
| Vv07g0331 | .                  | .                  | .                  | . |
| .         | .                  | .                  | .                  | . |
| .         | .                  | .                  | .                  | . |
| Vv07g0332 | Tc01_g029970       | Gorai.007G129800.1 | .                  | . |
| .         | .                  | .                  | .                  | . |
| .         | .                  | .                  | .                  | . |
| Vv07g0333 | .                  | .                  | .                  | . |
| .         | .                  | .                  | .                  | . |
| .         | .                  | .                  | .                  | . |
| Vv07g0334 | Tc01_g029980       | .                  | .                  | . |
| .         | .                  | .                  | .                  | . |
| .         | .                  | .                  | .                  | . |
| Vv07g0335 | .                  | .                  | .                  | . |
| .         | .                  | .                  | .                  | . |
| .         | .                  | .                  | .                  | . |
| Vv07g0336 | .                  | .                  | .                  | . |
| .         | .                  | .                  | .                  | . |
| .         | .                  | .                  | .                  | . |
| Vv07g0337 | .                  | .                  | .                  | . |
| Vv05g0350 | .                  | .                  | .                  | . |
| .         | .                  | .                  | .                  | . |
| Vv07g0338 | .                  | .                  | .                  | . |
| .         | .                  | .                  | .                  | . |
| .         | .                  | .                  | .                  | . |
| Vv07g0339 | Gorai.007G129700.1 | .                  | .                  | . |
| .         | .                  | .                  | .                  | . |
| .         | .                  | .                  | .                  | . |
| Vv07g0340 | Tc01_g029990       | .                  | .                  | . |
| .         | .                  | .                  | .                  | . |
| .         | .                  | .                  | .                  | . |
| Vv07g0341 | .                  | .                  | .                  | . |
| .         | .                  | .                  | .                  | . |
| .         | .                  | .                  | .                  | . |
| Vv07g0342 | Tc01_g030000       | .                  | .                  | . |
| .         | .                  | .                  | .                  | . |
| .         | .                  | .                  | .                  | . |
| Vv07g0343 | Tc01_g030030       | .                  | .                  | . |
| .         | .                  | .                  | .                  | . |
| .         | .                  | .                  | .                  | . |
| Vv07g0344 | .                  | .                  | .                  | . |
| .         | .                  | .                  | .                  | . |
| .         | .                  | .                  | .                  | . |
| Vv07g0345 | Tc01_g030060       | Gorai.007G129500.1 | .                  | . |
| .         | .                  | .                  | .                  | . |
| .         | Vv14g0261          | Tc05_g028810       | Gorai.013G125200.1 | . |
| .         | Gorai.007G129500.1 | .                  | .                  | . |
| Vv07g0346 | .                  | .                  | .                  | . |
| .         | .                  | .                  | .                  | . |



|           |                    |                    |                    |   |
|-----------|--------------------|--------------------|--------------------|---|
| Vv07g0363 | Tc01_g030230       | Gorai.007G129100.1 | .                  | . |
| .         | .                  | .                  | .                  | . |
| Vv07g0364 | Tc01_g030240       | Gorai.007G129000.1 | .                  | . |
|           | Gorai.004G052800.1 | Gorai.004G142100.1 | Vv05g0337          | . |
| .         | .                  | .                  | Gorai.002G028300.1 | . |
| Vv07g0365 | .                  | .                  | .                  | . |
| .         | .                  | .                  | .                  | . |
| Vv07g0366 | Tc01_g030260       | .                  | .                  | . |
| .         | .                  | .                  | .                  | . |
| Vv07g0367 | Tc01_g030280       | .                  | .                  | . |
| .         | .                  | .                  | .                  | . |
| Vv07g0368 | Tc01_g030290       | Gorai.007G128800.1 | .                  | . |
|           | Gorai.004G052700.1 | .                  | .                  | . |
| .         | .                  | .                  | .                  | . |
| Vv07g0369 | Tc01_g030300       | .                  | .                  | . |
| .         | .                  | .                  | .                  | . |
| Vv07g0370 | Tc01_g030310       | .                  | Gorai.008G146600.1 | . |
| .         | .                  | .                  | .                  | . |
| Vv07g0371 | .                  | .                  | .                  | . |
| Vv05g0320 | .                  | .                  | Gorai.011G190500.1 | . |
| .         | .                  | .                  | .                  | . |
| Vv07g0372 | Tc01_g030320       | .                  | Gorai.008G146500.1 | . |
| .         | .                  | .                  | .                  | . |
| Vv07g0373 | .                  | .                  | .                  | . |
| .         | .                  | .                  | .                  | . |
| Vv07g0374 | Tc01_g030330       | .                  | Gorai.008G146400.1 | . |
|           | Gorai.004G052600.1 | .                  | .                  | . |
| .         | .                  | .                  | .                  | . |
| Vv07g0375 | Tc01_g030340       | .                  | Gorai.008G146300.1 | . |
| .         | .                  | .                  | .                  | . |
| Vv07g0376 | .                  | .                  | .                  | . |
| .         | .                  | .                  | .                  | . |
| Vv07g0377 | Tc01_g030370       | .                  | Gorai.008G146200.1 | . |
|           | Gorai.004G052500.1 | .                  | .                  | . |
| .         | .                  | Vv14g0241          | .                  | . |
| .         | .                  | .                  | .                  | . |

|                    |                    |                    |                    |        |
|--------------------|--------------------|--------------------|--------------------|--------|
| Vv07g0378          | Tc01_g030380       | .                  | Gorai.008G146100.1 | .      |
| .                  | .                  | .                  | .                  | .      |
| .                  | .                  | .                  | .                  | .      |
| Vv07g0379          | Tc01_g030390       | .                  | Gorai.008G146000.1 | .      |
| Gorai.004G052400.1 | .                  | .                  | .                  | .      |
| .                  | .                  | .                  | .                  | .      |
| .                  | .                  | .                  | .                  | .      |
| Vv07g0380          | .                  | .                  | .                  | .      |
| .                  | .                  | .                  | .                  | .      |
| .                  | .                  | .                  | .                  | .      |
| Vv07g0381          | Tc01_g030410       | .                  | Gorai.008G145800.1 | .      |
| Gorai.004G089200.1 | .                  | .                  | .                  | .      |
| .                  | .                  | .                  | .                  | .      |
| .                  | .                  | .                  | .                  | .      |
| Vv07g0382          | Tc01_g030420       | .                  | .                  | Gorai. |
| 004G089300.1       | .                  | .                  | .                  | .      |
| .                  | .                  | .                  | .                  | .      |
| .                  | .                  | .                  | .                  | .      |
| Vv07g0383          | Tc01_g030430       | Gorai.007G128500.1 | Gorai.             | .      |
| 008G145700.1       | .                  | .                  | .                  | .      |
| .                  | .                  | .                  | .                  | .      |
| .                  | .                  | .                  | .                  | .      |
| Vv07g0384          | .                  | .                  | .                  | .      |
| .                  | .                  | .                  | .                  | .      |
| .                  | .                  | .                  | .                  | .      |
| Vv07g0385          | .                  | .                  | .                  | .      |
| .                  | .                  | .                  | .                  | .      |
| .                  | .                  | .                  | .                  | .      |
| Vv07g0386          | Tc01_g030440       | .                  | .                  | Gorai. |
| 004G089400.1       | Vv05g0313          | Tc04_g001060       | .                  | .      |
| .                  | .                  | .                  | .                  | .      |
| .                  | .                  | .                  | .                  | .      |
| Vv07g0387          | .                  | .                  | .                  | .      |
| .                  | .                  | .                  | .                  | .      |
| .                  | .                  | .                  | .                  | .      |
| Vv07g0388          | .                  | .                  | .                  | .      |
| .                  | .                  | .                  | .                  | .      |
| .                  | .                  | .                  | .                  | .      |
| Vv07g0389          | .                  | .                  | .                  | .      |
| .                  | .                  | .                  | .                  | .      |
| .                  | .                  | .                  | .                  | .      |
| Vv07g0390          | Gorai.007G128300.1 | .                  | .                  | .      |
| .                  | .                  | .                  | .                  | .      |
| .                  | .                  | .                  | .                  | .      |
| Vv07g0391          | .                  | .                  | Gorai.004G089600.1 | .      |
| .                  | .                  | .                  | .                  | .      |
| .                  | .                  | .                  | .                  | .      |
| Vv07g0392          | .                  | .                  | .                  | .      |
| Vv013rg0130        | .                  | .                  | .                  | .      |
| .                  | .                  | .                  | .                  | .      |
| Vv07g0393          | Tc01_g030460       | .                  | .                  | .      |

|                    |              |                    |   |                    |   |        |
|--------------------|--------------|--------------------|---|--------------------|---|--------|
| Vv013rg0131        | .            | .                  | . | .                  | . | .      |
| .                  | .            | .                  | . | .                  | . | .      |
| Vv07g0394          | Tc01_g030470 | .                  | . | .                  | . | .      |
| Vv013rg0132        | .            | .                  | . | .                  | . | .      |
| .                  | .            | .                  | . | .                  | . | .      |
| Vv07g0395          | Tc01_g030480 | .                  | . | .                  | . | .      |
| Vv013rg0134        | .            | .                  | . | .                  | . | .      |
| .                  | .            | .                  | . | .                  | . | .      |
| Vv07g0396          | Tc01_g030490 | .                  | . | .                  | . | .      |
| Vv013rg0135        | .            | .                  | . | .                  | . | .      |
| .                  | .            | .                  | . | .                  | . | .      |
| Vv07g0397          | .            | .                  | . | .                  | . | .      |
| .                  | .            | .                  | . | .                  | . | .      |
| .                  | .            | .                  | . | .                  | . | .      |
| Vv07g0398          | .            | .                  | . | .                  | . | .      |
| Vv013rg0137        | .            | .                  | . | .                  | . | .      |
| .                  | .            | .                  | . | .                  | . | .      |
| Vv07g0399          | .            | .                  | . | .                  | . | .      |
| Vv013rg0138        | .            | .                  | . | .                  | . | .      |
| .                  | .            | .                  | . | .                  | . | .      |
| Vv07g0400          | .            | .                  | . | .                  | . | Gorai. |
| 004G142300.1       | Vv05g0310    | .                  | . | .                  | . | .      |
| Gorai.011G191000.1 | .            | .                  | . | .                  | . | .      |
| .                  | .            | .                  | . | .                  | . | .      |
| Vv07g0401          | .            | .                  | . | .                  | . | .      |
| .                  | .            | .                  | . | .                  | . | .      |
| .                  | .            | .                  | . | .                  | . | .      |
| Vv07g0402          | Tc01_g030540 | .                  | . | .                  | . | Gorai. |
| 004G089800.1       | .            | .                  | . | .                  | . | .      |
| .                  | .            | .                  | . | .                  | . | .      |
| Vv07g0403          | .            | .                  | . | .                  | . | .      |
| .                  | .            | .                  | . | .                  | . | .      |
| .                  | .            | .                  | . | .                  | . | .      |
| Vv07g0404          | Tc01_g030560 | .                  | . | .                  | . | .      |
| Gorai.004G142400.1 | .            | .                  | . | .                  | . | .      |
| .                  | .            | .                  | . | .                  | . | .      |
| Vv07g0405          | Tc01_g030570 | .                  | . | Gorai.008G145300.1 | . | .      |
| .                  | .            | .                  | . | .                  | . | .      |
| .                  | .            | .                  | . | .                  | . | .      |
| Vv07g0406          | Tc01_g030580 | Gorai.007G128200.1 | . | Gorai.             | . | .      |
| 008G145200.1       | .            | Gorai.004G090000.1 | . | Vv05g0009          | . | .      |
| Tc04_g028300       | .            | Gorai.005G061000.1 | . | .                  | . | .      |
| .                  | .            | .                  | . | .                  | . | .      |
| Vv07g0407          | .            | .                  | . | .                  | . | .      |
| .                  | .            | .                  | . | .                  | . | .      |
| .                  | .            | .                  | . | .                  | . | .      |
| Vv07g0408          | Tc01_g030590 | Gorai.007G128100.1 | . | Gorai.             | . | .      |
| 008G055800.1       | .            | Gorai.004G090200.1 | . | Gorai.004G142500.1 | . | .      |
| .                  | .            | .                  | . | .                  | . | .      |
| .                  | .            | .                  | . | .                  | . | .      |

|              |                    |                    |   |   |   |           |
|--------------|--------------------|--------------------|---|---|---|-----------|
| Vv07g0409    | Tc01_g030600       | .                  | . | . | . | .         |
| .            | .                  | .                  | . | . | . | .         |
| Vv07g0410    | .                  | .                  | . | . | . | .         |
| .            | .                  | .                  | . | . | . | .         |
| Vv07g0411    | .                  | .                  | . | . | . | .         |
| .            | .                  | .                  | . | . | . | .         |
| Vv07g0412    | .                  | .                  | . | . | . | .         |
| .            | .                  | .                  | . | . | . | .         |
| Vv07g0413    | Tc01_g030610       | Gorai.007G128000.1 | . | . | . | .         |
|              | Gorai.004G090300.1 | Vv05g0010          | . | . | . | .         |
| Tc04_g028320 | .                  | .                  | . | . | . | Vv14g0219 |
|              | Tc04_g028320       | Gorai.007G300700.1 | . | . | . | Gorai.    |
| 007G128000.1 | .                  | .                  | . | . | . | .         |
| Vv07g0414    | Tc01_g030620       | .                  | . | . | . | .         |
| .            | .                  | .                  | . | . | . | .         |
| Vv07g0415    | Tc01_g030630       | Gorai.007G127900.1 | . | . | . | .         |
| .            | .                  | .                  | . | . | . | .         |
| Vv07g0416    | Tc01_g030640       | Gorai.007G127800.1 | . | . | . | .         |
| .            | .                  | .                  | . | . | . | .         |
| Vv07g0417    | Tc01_g030650       | .                  | . | . | . | Gorai.    |
| 004G090400.1 | .                  | .                  | . | . | . | .         |
| .            | .                  | .                  | . | . | . | .         |
| Vv07g0418    | Tc01_g030660       | Gorai.007G127700.1 | . | . | . | .         |
|              | Gorai.004G090500.1 | .                  | . | . | . | .         |
| .            | .                  | .                  | . | . | . | .         |
| Vv07g0419    | Tc01_g030670       | .                  | . | . | . | .         |
| .            | .                  | .                  | . | . | . | .         |
| Vv07g0420    | Tc01_g030680       | Gorai.007G127600.1 | . | . | . | .         |
| .            | .                  | .                  | . | . | . | .         |
| Vv07g0421    | Tc01_g030690       | .                  | . | . | . | .         |
| .            | .                  | .                  | . | . | . | .         |
| Vv07g0422    | Tc01_g030700       | .                  | . | . | . | Gorai.    |
| 004G090600.1 | .                  | .                  | . | . | . | .         |
| .            | .                  | .                  | . | . | . | .         |
| Vv07g0423    | .                  | .                  | . | . | . | .         |
| .            | .                  | .                  | . | . | . | .         |
| Vv07g0424    | Tc01_g030720       | .                  | . | . | . | .         |
| .            | .                  | .                  | . | . | . | .         |

|                    |                    |                    |                    |        |
|--------------------|--------------------|--------------------|--------------------|--------|
| Vv07g0425          | Tc01_g030760       | Gorai.007G127500.1 | .                  | .      |
|                    | Gorai.004G091000.1 | Gorai.004G239100.1 | .                  | .      |
| .                  | .                  | .                  | .                  | .      |
| Vv07g0426          | Tc01_g030770       | Gorai.007G127400.1 | .                  | .      |
| .                  | .                  | .                  | .                  | .      |
| Vv07g0427          | .                  | .                  | .                  | .      |
| .                  | .                  | .                  | .                  | .      |
| Vv07g0428          | Tc01_g030790       | Gorai.007G127300.1 | .                  | .      |
|                    | Gorai.004G052100.1 | Gorai.004G239000.1 | Vv05g0028          | .      |
| .                  | .                  | .                  | .                  | .      |
| Vv07g0429          | Tc01_g030800       | .                  | .                  | Gorai. |
| 004G091300.1       | Vv05g0032          | Tc04_g028440       | .                  | .      |
| .                  | .                  | .                  | .                  | .      |
| Vv07g0430          | Tc01_g030830       | Gorai.007G127200.1 | .                  | .      |
|                    | Gorai.004G091600.1 | .                  | .                  | .      |
| .                  | .                  | .                  | .                  | .      |
| Vv07g0431          | Tc01_g030860       | .                  | .                  | .      |
| .                  | .                  | .                  | .                  | .      |
| Vv14g0212          | .                  | .                  | .                  | .      |
| Vv07g0432          | Tc01_g030870       | .                  | .                  | .      |
|                    | Vv05g0038          | Tc04_g028490       | Gorai.006G260900.1 | .      |
| .                  | .                  | Vv14g0211          | Tc04_g028490       | .      |
| .                  | .                  | .                  | .                  | .      |
| Vv07g0433          | Tc01_g030880       | Gorai.007G126900.1 | .                  | .      |
| .                  | .                  | .                  | .                  | .      |
| .                  | .                  | .                  | .                  | .      |
| Vv07g0434          | Tc01_g030890       | .                  | .                  | .      |
| Gorai.004G142700.1 | Vv05g0041          | Tc04_g028520       | .                  | .      |
| .                  | .                  | .                  | .                  | .      |
| .                  | .                  | .                  | .                  | .      |
| Vv07g0435          | Tc01_g030910       | .                  | .                  | .      |
|                    | Vv05g0045          | Tc04_g028580       | Gorai.006G260500.1 | .      |
| Gorai.005G061900.1 | .                  | Gorai.011G193300.1 | .                  | .      |
| .                  | .                  | .                  | .                  | .      |
| Vv07g0436          | .                  | .                  | .                  | .      |
| .                  | .                  | .                  | .                  | .      |
| .                  | .                  | .                  | .                  | .      |
| Vv07g0437          | Tc01_g030930       | .                  | .                  | Gorai. |
| 004G051900.1       | .                  | .                  | .                  | .      |
| .                  | .                  | .                  | .                  | .      |
| Vv07g0438          | .                  | .                  | Gorai.004G051700.1 | .      |
| .                  | .                  | .                  | .                  | .      |
| .                  | .                  | .                  | .                  | .      |

|                    |                    |                    |                    |   |        |
|--------------------|--------------------|--------------------|--------------------|---|--------|
| Vv07g0439          | Tc01_g031000       | .                  | .                  | . | Gorai. |
| 004G051600.1       | Gorai.004G142800.1 | .                  | .                  | . | .      |
| .                  | .                  | .                  | .                  | . | .      |
| .                  | .                  | .                  | .                  | . | .      |
| Vv07g0440          | .                  | .                  | .                  | . | .      |
| .                  | .                  | .                  | .                  | . | .      |
| .                  | .                  | .                  | .                  | . | .      |
| Vv07g0441          | Tc01_g031050       | Gorai.007G126400.1 | .                  | . | .      |
| .                  | Vv05g0052          | Tc04_g028630       | Gorai.             | . | .      |
| 006G260200.1       | Gorai.005G062000.1 | .                  | Gorai.011G193800.1 | . | .      |
| .                  | .                  | .                  | .                  | . | .      |
| Vv07g0442          | Tc01_g031060       | Gorai.007G126300.1 | .                  | . | .      |
| .                  | .                  | .                  | .                  | . | .      |
| .                  | .                  | .                  | .                  | . | .      |
| Vv07g0443          | Tc01_g031070       | .                  | .                  | . | .      |
| .                  | .                  | .                  | .                  | . | .      |
| .                  | .                  | .                  | .                  | . | .      |
| Vv07g0444          | .                  | .                  | .                  | . | .      |
| .                  | .                  | .                  | .                  | . | .      |
| .                  | .                  | .                  | .                  | . | .      |
| Vv07g0445          | Tc01_g031080       | Gorai.007G126200.1 | .                  | . | .      |
| .                  | .                  | .                  | .                  | . | .      |
| .                  | .                  | .                  | .                  | . | .      |
| Vv07g0446          | Tc01_g031090       | .                  | .                  | . | Gorai. |
| 004G051500.1       | .                  | .                  | .                  | . | .      |
| .                  | Vv14g0194          | .                  | .                  | . | .      |
| .                  | .                  | .                  | .                  | . | .      |
| Vv07g0447          | .                  | .                  | .                  | . | .      |
| .                  | .                  | .                  | .                  | . | .      |
| .                  | .                  | .                  | .                  | . | .      |
| Vv07g0448          | .                  | .                  | .                  | . | .      |
| Vv05g0059          | Tc04_g028710       | Gorai.006G260100.1 | .                  | . | .      |
| Gorai.006G077400.1 | Gorai.011G194200.1 | .                  | .                  | . | .      |
| .                  | .                  | .                  | .                  | . | .      |
| Vv07g0449          | .                  | .                  | .                  | . | .      |
| .                  | .                  | .                  | .                  | . | .      |
| .                  | .                  | .                  | .                  | . | .      |
| Vv07g0450          | .                  | .                  | .                  | . | .      |
| .                  | .                  | .                  | .                  | . | .      |
| .                  | .                  | .                  | .                  | . | .      |
| Vv07g0451          | .                  | .                  | .                  | . | .      |
| .                  | .                  | .                  | .                  | . | .      |
| .                  | .                  | .                  | .                  | . | .      |
| Vv07g0452          | Tc01_g031120       | .                  | .                  | . | .      |
| .                  | .                  | .                  | .                  | . | .      |
| Vv14g0181          | Tc04_g020020       | .                  | .                  | . | Gorai. |
| 011G150300.1       | .                  | .                  | .                  | . | .      |
| Vv07g0453          | Tc01_g031130       | Gorai.008G053500.1 | .                  | . | .      |
| .                  | .                  | .                  | .                  | . | .      |
| .                  | .                  | .                  | .                  | . | .      |



|                    |                    |                    |                    |
|--------------------|--------------------|--------------------|--------------------|
| Vv07g0454          | Tc01_g031140       | Gorai.007G126100.1 | Gorai.             |
| 008G053400.1       | .                  | Gorai.004G143000.1 | Vv05g0091          |
|                    | Tc04_g028960       | Gorai.006G259900.1 | Gorai.             |
| 006G077900.1       | .                  | .                  | .                  |
| .                  | .                  | .                  | .                  |
| Vv07g0455          | Tc01_g031150       | .                  | Gorai.             |
| 004G051400.1       | .                  | .                  | .                  |
| .                  | .                  | .                  | .                  |
| Vv07g0456          | Tc01_g031160       | Gorai.007G126000.1 | .                  |
| .                  | Gorai.004G237800.1 | Vv05g0092          | .                  |
| Tc04_g028970       | Gorai.006G259800.1 | Gorai.005G065100.1 | .                  |
| .                  | Vv14g0179          | Tc04_g028970       | .                  |
| .                  | .                  | .                  | .                  |
| Vv07g0457          | Tc01_g031170       | Gorai.007G125900.1 | .                  |
| .                  | .                  | .                  | .                  |
| .                  | Vv14g0174          | Gorai.013G127800.1 | .                  |
| Gorai.007G303900.1 | Gorai.007G125900.1 | .                  | .                  |
| Vv07g0458          | Tc01_g031180       | Gorai.007G125800.1 | .                  |
| .                  | .                  | .                  | .                  |
| .                  | .                  | .                  | .                  |
| Vv07g0459          | Tc01_g031190       | Gorai.007G125700.1 | .                  |
| .                  | Gorai.004G063600.1 | Vv05g0094          | .                  |
| Tc04_g029000       | Gorai.005G065200.1 | .                  | .                  |
| .                  | .                  | .                  | .                  |
| Vv07g0460          | Tc01_g031200       | .                  | .                  |
| .                  | .                  | .                  | .                  |
| .                  | .                  | .                  | .                  |
| Vv07g0461          | Tc01_g031210       | Gorai.007G125600.1 | .                  |
| .                  | .                  | .                  | .                  |
| .                  | .                  | .                  | .                  |
| Vv07g0462          | Tc01_g031230       | Gorai.007G125400.1 | .                  |
| .                  | .                  | .                  | .                  |
| .                  | .                  | .                  | .                  |
| Vv07g0463          | Tc01_g031260       | Gorai.007G125300.1 | .                  |
| .                  | .                  | .                  | .                  |
| .                  | .                  | .                  | .                  |
| Vv07g0464          | Tc01_g031280       | .                  | .                  |
| .                  | .                  | .                  | .                  |
| .                  | .                  | .                  | .                  |
| Vv07g0465          | Tc01_g031290       | .                  | .                  |
| .                  | Vv05g0096          | Tc04_g029020       | Gorai.005G065300.1 |
| .                  | .                  | Gorai.002G029400.1 | Vv14g0172          |
| Tc04_g029020       | .                  | .                  | .                  |
| Vv07g0466          | Tc01_g031300       | .                  | .                  |
| .                  | .                  | .                  | .                  |
| .                  | .                  | .                  | .                  |
| Vv07g0467          | .                  | .                  | .                  |
| .                  | .                  | .                  | .                  |
| .                  | .                  | .                  | .                  |
| Vv07g0468          | Tc01_g031310       | Gorai.007G124900.1 | .                  |

|                    |                    |                    |        |   |        |
|--------------------|--------------------|--------------------|--------|---|--------|
| .                  | Gorai.004G235800.1 | .                  | .      | . | .      |
| .                  | .                  | .                  | .      | . | .      |
| .                  | .                  | .                  | .      | . | .      |
| Vv07g0469          | Tc01_g031320       | .                  | .      | . | .      |
| .                  | .                  | .                  | .      | . | .      |
| .                  | .                  | .                  | .      | . | .      |
| Vv07g0470          | .                  | .                  | .      | . | Gorai. |
| 004G232800.1       | .                  | .                  | .      | . | .      |
| .                  | .                  | .                  | .      | . | .      |
| Vv07g0471          | .                  | .                  | .      | . | .      |
| Vv05g0099          | .                  | .                  | .      | . | .      |
| .                  | .                  | .                  | .      | . | .      |
| Vv07g0472          | Tc01_g031380       | Gorai.007G124700.1 | .      | . | .      |
| .                  | .                  | .                  | .      | . | .      |
| .                  | .                  | .                  | .      | . | .      |
| Vv07g0473          | .                  | .                  | .      | . | .      |
| .                  | .                  | .                  | .      | . | .      |
| .                  | .                  | .                  | .      | . | .      |
| Vv07g0474          | Tc01_g031390       | Gorai.007G124600.1 | Gorai. | . | .      |
| 008G049700.1       | Gorai.004G050800.1 | .                  | .      | . | .      |
| .                  | .                  | .                  | .      | . | .      |
| .                  | .                  | .                  | .      | . | .      |
| Vv07g0475          | .                  | .                  | .      | . | .      |
| .                  | .                  | .                  | .      | . | .      |
| .                  | .                  | .                  | .      | . | .      |
| Vv07g0476          | Tc01_g031410       | Gorai.007G124500.1 | .      | . | .      |
| .                  | .                  | .                  | .      | . | .      |
| .                  | .                  | .                  | .      | . | .      |
| Vv07g0477          | Tc01_g031420       | Gorai.007G124400.1 | .      | . | .      |
| .                  | .                  | .                  | .      | . | .      |
| .                  | Vv14g0158          | Gorai.013G128900.1 | .      | . | .      |
| Gorai.007G305200.1 | Gorai.007G124400.1 | .                  | .      | . | .      |
| Vv07g0478          | Tc01_g031430       | Gorai.007G124300.1 | Gorai. | . | .      |
| 008G141200.1       | Gorai.004G050700.1 | .                  | .      | . | .      |
| .                  | .                  | .                  | .      | . | .      |
| .                  | .                  | .                  | .      | . | .      |
| Vv07g0479          | .                  | .                  | .      | . | .      |
| .                  | .                  | .                  | .      | . | .      |
| .                  | .                  | .                  | .      | . | .      |
| Vv07g0480          | Tc01_g031460       | Gorai.008G141000.1 | .      | . | .      |
| .                  | .                  | .                  | .      | . | .      |
| .                  | .                  | .                  | .      | . | .      |
| Vv07g0481          | .                  | .                  | .      | . | .      |
| .                  | .                  | .                  | .      | . | .      |
| .                  | .                  | .                  | .      | . | .      |
| Vv07g0482          | Tc01_g031480       | Gorai.007G123700.1 | .      | . | .      |
| Gorai.004G065200.1 | Gorai.004G143600.1 | .                  | .      | . | .      |
| .                  | .                  | .                  | .      | . | .      |
| .                  | .                  | .                  | .      | . | .      |
| Vv07g0483          | .                  | .                  | .      | . | .      |

|                    |                    |                    |                    |   |   |   |   |
|--------------------|--------------------|--------------------|--------------------|---|---|---|---|
| .                  | .                  | .                  | .                  | . | . | . | . |
| .                  | .                  | .                  | .                  | . | . | . | . |
| Vv07g0484          | .                  | .                  | .                  | . | . | . | . |
| .                  | .                  | .                  | .                  | . | . | . | . |
| .                  | .                  | .                  | .                  | . | . | . | . |
| Vv07g0485          | Tc01_g031490       | Gorai.007G123600.1 | .                  | . | . | . | . |
| .                  | Gorai.004G143700.1 | .                  | .                  | . | . | . | . |
| .                  | .                  | .                  | .                  | . | . | . | . |
| .                  | .                  | .                  | .                  | . | . | . | . |
| Vv07g0486          | Tc01_g031500       | Gorai.007G123500.1 | .                  | . | . | . | . |
| .                  | Gorai.004G143800.1 | .                  | .                  | . | . | . | . |
| .                  | .                  | .                  | .                  | . | . | . | . |
| .                  | .                  | .                  | .                  | . | . | . | . |
| Vv07g0487          | .                  | .                  | .                  | . | . | . | . |
| .                  | .                  | .                  | .                  | . | . | . | . |
| .                  | .                  | .                  | .                  | . | . | . | . |
| Vv07g0488          | .                  | .                  | .                  | . | . | . | . |
| .                  | .                  | .                  | .                  | . | . | . | . |
| .                  | .                  | .                  | .                  | . | . | . | . |
| Vv07g0489          | .                  | .                  | .                  | . | . | . | . |
| .                  | .                  | .                  | .                  | . | . | . | . |
| .                  | .                  | .                  | .                  | . | . | . | . |
| Vv07g0490          | Tc01_g031510       | .                  | Gorai.008G140900.1 | . | . | . | . |
| .                  | .                  | .                  | .                  | . | . | . | . |
| .                  | .                  | .                  | .                  | . | . | . | . |
| Vv07g0491          | Tc01_g031520       | Gorai.007G123400.1 | Gorai.             | . | . | . | . |
| 008G140700.1       | .                  | Gorai.004G143900.1 | .                  | . | . | . | . |
| .                  | .                  | .                  | .                  | . | . | . | . |
| .                  | .                  | .                  | .                  | . | . | . | . |
| Vv07g0492          | Tc01_g031530       | .                  | Gorai.008G140600.1 | . | . | . | . |
| .                  | Vv05g0109          | Tc04_g029160       | Gorai.             | . | . | . | . |
| 006G259500.1       | .                  | Gorai.011G198200.1 | .                  | . | . | . | . |
| .                  | .                  | .                  | .                  | . | . | . | . |
| .                  | .                  | .                  | .                  | . | . | . | . |
| Vv07g0493          | Tc01_g031540       | .                  | Gorai.008G140500.1 | . | . | . | . |
| .                  | Gorai.004G144000.1 | .                  | .                  | . | . | . | . |
| .                  | .                  | .                  | .                  | . | . | . | . |
| .                  | .                  | .                  | .                  | . | . | . | . |
| Vv07g0494          | .                  | .                  | .                  | . | . | . | . |
| .                  | .                  | .                  | .                  | . | . | . | . |
| .                  | .                  | .                  | .                  | . | . | . | . |
| Vv07g0495          | .                  | .                  | .                  | . | . | . | . |
| .                  | .                  | .                  | .                  | . | . | . | . |
| .                  | .                  | .                  | .                  | . | . | . | . |
| Vv07g0496          | Tc01_g031570       | .                  | .                  | . | . | . | . |
| .                  | Vv05g0117          | Tc04_g029220       | Gorai.006G259400.1 | . | . | . | . |
| Gorai.005G066000.1 | .                  | Gorai.011G198800.1 | .                  | . | . | . | . |
| .                  | .                  | .                  | .                  | . | . | . | . |
| .                  | .                  | .                  | .                  | . | . | . | . |
| Vv07g0497          | Tc01_g031580       | .                  | Gorai.008G140200.1 | . | . | . | . |
| .                  | Gorai.004G144200.1 | .                  | .                  | . | . | . | . |
| .                  | .                  | Vv14g0144          | .                  | . | . | . | . |

|                           |                    |                    |           |
|---------------------------|--------------------|--------------------|-----------|
| Vv07g0498<br>008G140100.1 | Tc01_g031590       | Gorai.007G123200.1 | Gorai.    |
| .                         | .                  | .                  | .         |
| .                         | .                  | .                  | .         |
| Vv07g0499                 | Tc01_g031600       | .                  | .         |
| .                         | .                  | .                  | .         |
| .                         | .                  | .                  | .         |
| Vv07g0500                 | Tc01_g031620       | Gorai.008G139900.1 | .         |
| .                         | .                  | .                  | .         |
| .                         | .                  | .                  | .         |
| Vv07g0501                 | .                  | .                  | Vv14g0143 |
| .                         | Gorai.013G129200.1 | Gorai.007G305800.1 | .         |
| Gorai.013G206900.1        | .                  | .                  | .         |
| Vv07g0502                 | .                  | .                  | .         |
| .                         | .                  | .                  | .         |
| .                         | .                  | .                  | .         |
| Vv07g0503                 | .                  | .                  | .         |
| .                         | .                  | .                  | .         |
| .                         | .                  | .                  | .         |
| Vv07g0504                 | Tc01_g031630       | .                  | .         |
| .                         | .                  | .                  | .         |
| .                         | .                  | .                  | .         |
| Vv07g0505                 | .                  | .                  | .         |
| .                         | .                  | .                  | .         |
| .                         | .                  | .                  | .         |
| Vv07g0506                 | Tc01_g031640       | .                  | .         |
| .                         | .                  | .                  | .         |
| .                         | .                  | .                  | .         |
| Vv07g0507                 | Tc01_g031650       | Gorai.007G123000.1 | .         |
| .                         | Gorai.004G144300.1 | .                  | .         |
| .                         | .                  | .                  | .         |
| .                         | .                  | .                  | .         |
| Vv07g0508<br>008G139800.1 | Tc01_g031660       | Gorai.007G122900.1 | Gorai.    |
| .                         | .                  | .                  | .         |
| .                         | .                  | .                  | .         |
| .                         | .                  | .                  | .         |
| Vv07g0509<br>008G139700.1 | Tc01_g031670       | Gorai.007G122800.1 | Gorai.    |
| .                         | Gorai.004G050400.1 | .                  | Vv05g0126 |
| Tc04_g029350              | .                  | Gorai.006G079800.1 | .         |
| .                         | Vv14g0131          | Tc04_g029350       | .         |
| Gorai.007G122800.1        | .                  | .                  | .         |
| Vv07g0510                 | Tc01_g031710       | Gorai.008G139300.1 | .         |
| .                         | .                  | .                  | .         |
| .                         | .                  | .                  | .         |
| Vv07g0511                 | Tc01_g031730       | Gorai.007G122600.1 | .         |
| .                         | Gorai.004G144500.1 | .                  | .         |
| .                         | .                  | .                  | .         |
| .                         | .                  | .                  | .         |

|                    |                    |                    |                    |        |
|--------------------|--------------------|--------------------|--------------------|--------|
| Vv07g0512          | Tc01_g031740       | .                  | Gorai.008G139200.1 | .      |
| .                  | .                  | .                  | .                  | .      |
| Vv07g0513          | Tc01_g031750       | .                  | Gorai.008G139100.1 | .      |
| .                  | .                  | .                  | .                  | .      |
| Vv07g0514          | Tc01_g031760       | .                  | Gorai.008G139000.1 | .      |
| .                  | Vv05g0128          | .                  | Tc04_g029390       | Gorai. |
| 006G258800.1       | Gorai.005G066300.1 | .                  | .                  | .      |
| .                  | .                  | .                  | .                  | .      |
| Vv07g0515          | .                  | .                  | .                  | .      |
| Vv05g0129          | Tc04_g029400       | Gorai.006G258700.1 | .                  | .      |
| Gorai.011G199600.1 | .                  | .                  | .                  | .      |
| .                  | .                  | .                  | .                  | .      |
| Vv07g0516          | Tc01_g031770       | Gorai.007G122400.1 | .                  | .      |
| Gorai.004G050300.1 | .                  | .                  | .                  | .      |
| .                  | .                  | .                  | .                  | .      |
| .                  | .                  | .                  | .                  | .      |
| Vv07g0517          | Tc01_g031780       | Gorai.007G122300.1 | Gorai.             | .      |
| 008G138900.1       | Gorai.004G048600.1 | .                  | .                  | .      |
| .                  | .                  | .                  | .                  | .      |
| Vv07g0518          | Tc01_g031790       | Gorai.007G122200.1 | Gorai.             | .      |
| 008G138800.1       | .                  | .                  | .                  | .      |
| .                  | .                  | .                  | .                  | .      |
| Vv07g0519          | .                  | .                  | .                  | .      |
| .                  | .                  | .                  | .                  | .      |
| Vv07g0520          | .                  | .                  | Gorai.004G066400.1 | .      |
| .                  | .                  | .                  | .                  | .      |
| Vv07g0521          | .                  | .                  | .                  | .      |
| .                  | .                  | .                  | .                  | .      |
| Vv07g0522          | Tc01_g031800       | .                  | .                  | .      |
| Vv14g0122          | Tc04_g029410       | .                  | Gorai.007G306800.1 | .      |
| .                  | .                  | .                  | .                  | .      |
| Vv07g0523          | Tc01_g031810       | .                  | Gorai.008G138700.1 | .      |
| .                  | .                  | .                  | .                  | .      |
| Vv07g0524          | Tc01_g031820       | .                  | Gorai.008G138500.1 | .      |
| .                  | .                  | .                  | .                  | .      |
| Vv07g0525          | .                  | .                  | .                  | .      |
| .                  | .                  | .                  | .                  | .      |
| Vv07g0526          | Tc01_g031830       | .                  | .                  | .      |
| Vv05g0307          | .                  | .                  | .                  | .      |

|                    |                    |                    |                    |        |
|--------------------|--------------------|--------------------|--------------------|--------|
| Vv07g0527          | Tc01_g031840       | Gorai.007G121600.1 | .                  | .      |
| .                  | .                  | .                  | .                  | .      |
| Vv07g0528          | .                  | .                  | .                  | .      |
| .                  | .                  | .                  | .                  | .      |
| Vv07g0529          | Tc01_g031850       | .                  | .                  | Gorai. |
| 004G069400.1       | Gorai.004G144700.1 | .                  | .                  | .      |
| .                  | .                  | .                  | .                  | .      |
| Vv07g0530          | .                  | .                  | .                  | .      |
| .                  | .                  | .                  | .                  | .      |
| Vv07g0531          | Tc01_g031890       | .                  | .                  | .      |
| Gorai.004G144800.1 | .                  | .                  | .                  | .      |
| .                  | .                  | .                  | .                  | .      |
| Vv07g0532          | Tc01_g031900       | .                  | Gorai.008G138300.1 | .      |
| .                  | .                  | .                  | .                  | .      |
| Vv07g0533          | Tc01_g031940       | .                  | Gorai.008G138000.1 | .      |
| .                  | .                  | .                  | .                  | .      |
| Vv07g0534          | .                  | .                  | .                  | .      |
| .                  | .                  | .                  | .                  | .      |
| Vv07g0535          | .                  | .                  | .                  | .      |
| .                  | .                  | .                  | .                  | .      |
| Vv07g0536          | Tc01_g031960       | Gorai.007G121200.1 | Gorai.             | .      |
| 008G137900.1       | Gorai.004G069500.1 | Gorai.004G144900.1 | .                  | .      |
| .                  | .                  | .                  | .                  | .      |
| Vv07g0537          | Tc01_g031970       | .                  | .                  | .      |
| .                  | .                  | .                  | .                  | .      |
| Vv07g0538          | .                  | .                  | .                  | .      |
| .                  | .                  | .                  | .                  | .      |
| Vv07g0539          | Tc01_g032000       | .                  | .                  | .      |
| .                  | .                  | .                  | .                  | .      |
| Vv07g0540          | Tc01_g032010       | .                  | .                  | .      |
| .                  | .                  | .                  | .                  | .      |
| Vv14g0111          | Tc04_g029860       | .                  | .                  | Gorai. |
| 011G202000.1       | .                  | .                  | .                  | .      |
| Vv07g0541          | Tc01_g032040       | .                  | .                  | .      |
| Gorai.004G145100.1 | .                  | .                  | .                  | .      |
| .                  | .                  | .                  | .                  | .      |
| Vv07g0542          | Tc01_g032050       | .                  | Gorai.008G137800.1 | .      |

|                    |              |                    |   |   |        |   |
|--------------------|--------------|--------------------|---|---|--------|---|
| .                  | .            | .                  | . | . | .      | . |
| .                  | .            | .                  | . | . | .      | . |
| Vv07g0543          | Tc01_g008480 | .                  | . | . | .      | . |
| .                  | .            | .                  | . | . | .      | . |
| .                  | .            | .                  | . | . | .      | . |
| Vv07g0544          | Tc01_g032080 | .                  | . | . | .      | . |
| .                  | .            | .                  | . | . | .      | . |
| .                  | .            | .                  | . | . | .      | . |
| Vv07g0545          | .            | .                  | . | . | .      | . |
| .                  | .            | .                  | . | . | .      | . |
| .                  | .            | .                  | . | . | .      | . |
| Vv07g0546          | Tc01_g032270 | .                  | . | . | .      | . |
| Gorai.004G145200.1 | .            | .                  | . | . | .      | . |
| .                  | Vv14g0102    | Tc04_g030020       | . | . | .      | . |
| Gorai.013G208100.1 | .            | Gorai.002G031600.1 | . | . | .      | . |
| Vv07g0547          | Tc01_g032280 | Gorai.008G137600.1 | . | . | .      | . |
| .                  | .            | .                  | . | . | .      | . |
| .                  | .            | .                  | . | . | .      | . |
| Vv07g0548          | Tc01_g032290 | .                  | . | . | .      | . |
| .                  | .            | .                  | . | . | .      | . |
| .                  | .            | .                  | . | . | .      | . |
| Vv07g0549          | .            | .                  | . | . | .      | . |
| .                  | .            | .                  | . | . | .      | . |
| .                  | .            | .                  | . | . | .      | . |
| Vv07g0550          | .            | .                  | . | . | .      | . |
| .                  | .            | .                  | . | . | .      | . |
| .                  | .            | .                  | . | . | .      | . |
| Vv07g0551          | .            | .                  | . | . | .      | . |
| .                  | .            | .                  | . | . | .      | . |
| .                  | .            | .                  | . | . | .      | . |
| Vv07g0552          | Tc01_g032300 | .                  | . | . | .      | . |
| .                  | .            | .                  | . | . | .      | . |
| .                  | .            | .                  | . | . | .      | . |
| Vv07g0553          | .            | .                  | . | . | .      | . |
| .                  | .            | .                  | . | . | .      | . |
| .                  | .            | .                  | . | . | .      | . |
| Vv07g0554          | .            | .                  | . | . | .      | . |
| .                  | .            | .                  | . | . | .      | . |
| .                  | .            | .                  | . | . | .      | . |
| Vv07g0555          | .            | .                  | . | . | .      | . |
| .                  | .            | .                  | . | . | .      | . |
| .                  | .            | .                  | . | . | .      | . |
| Vv07g0556          | .            | .                  | . | . | .      | . |
| .                  | .            | .                  | . | . | .      | . |
| .                  | .            | .                  | . | . | .      | . |
| Vv07g0557          | .            | .                  | . | . | Gorai. | . |
| 004G145300.1       | .            | .                  | . | . | .      | . |
| .                  | .            | .                  | . | . | .      | . |
| Vv07g0558          | .            | .                  | . | . | .      | . |
| .                  | .            | .                  | . | . | .      | . |

|                    |                           |                                    |                    |
|--------------------|---------------------------|------------------------------------|--------------------|
| Vv07g0559          | Tc01_g032310              | Gorai.008G137500.1                 |                    |
| Vv07g0560          | Tc01_g032330<br>Vv05g0278 | Gorai.008G137400.1<br>Tc04_g030600 |                    |
| Vv07g0561          | Tc01_g032340              | Gorai.008G137300.1                 |                    |
| Vv07g0562          | Tc01_g032350              |                                    |                    |
| Gorai.004G145900.1 | Vv14g0096                 |                                    | Gorai.007G308200.1 |
| Vv07g0563          |                           | Gorai.007G120900.1                 |                    |
| Vv14g0085          |                           | Gorai.013G130800.1                 |                    |
| Vv07g0564          |                           |                                    |                    |
| Vv07g0565          | Tc01_g032360              |                                    |                    |
| Vv14g0082          | Tc04_g030130              | Gorai.013G130900.1                 |                    |
| Gorai.007G120900.1 |                           |                                    |                    |
| Vv07g0566          | Tc01_g032380              |                                    |                    |
| Vv07g0567          | Tc01_g032390              | Gorai.007G120600.1                 | Gorai.             |
| 008G137100.1       |                           | Gorai.004G146100.1                 |                    |
| Vv07g0568          |                           |                                    |                    |
| Vv07g0569          | Tc01_g032400              |                                    |                    |
| Vv07g0570          | Tc01_g032410              | Gorai.007G120500.1                 |                    |
| Vv07g0571          |                           |                                    |                    |
| Vv07g0572          | Tc01_g032420              |                                    |                    |
| Vv07g0573          | Tc01_g032430              |                                    |                    |



|              |                    |                    |        |
|--------------|--------------------|--------------------|--------|
| Vv07g0574    | Tc01_g032440       | Gorai.008G137000.1 | .      |
| .            | Gorai.004G146300.1 | Vv05g0239          | .      |
| Tc04_g030250 | Gorai.006G266200.1 | Gorai.005G070200.1 | .      |
| .            | .                  | .                  | .      |
| Vv07g0575    | Tc01_g032480       | Gorai.008G136700.1 | .      |
| .            | Vv05g0237          | Tc04_g030230       | Gorai. |
| 006G266100.1 | Gorai.005G069900.1 | .                  | .      |
| Vv14g0072    | Tc04_g030230       | .                  | .      |
| Vv07g0576    | Tc01_g032490       | Gorai.008G136600.1 | .      |
| .            | .                  | .                  | .      |
| .            | .                  | .                  | .      |
| Vv07g0577    | Tc01_g032500       | Gorai.008G136500.1 | .      |
| .            | .                  | .                  | .      |
| .            | .                  | .                  | .      |
| Vv07g0578    | Tc01_g032510       | Gorai.007G119900.1 | .      |
| .            | .                  | .                  | .      |
| .            | .                  | .                  | .      |
| Vv07g0579    | .                  | .                  | .      |
| .            | .                  | .                  | .      |
| .            | .                  | .                  | .      |
| Vv07g0580    | Tc01_g032580       | .                  | .      |
| .            | .                  | .                  | .      |
| .            | .                  | .                  | .      |
| Vv07g0581    | Tc01_g008530       | .                  | .      |
| .            | .                  | .                  | .      |
| .            | .                  | .                  | .      |
| Vv07g0582    | .                  | .                  | .      |
| .            | .                  | .                  | .      |
| .            | .                  | .                  | .      |
| Vv07g0583    | .                  | .                  | .      |
| .            | .                  | .                  | .      |
| .            | .                  | .                  | .      |
| Vv07g0584    | .                  | .                  | Gorai. |
| 004G146600.1 | .                  | .                  | .      |
| .            | .                  | .                  | .      |
| Vv07g0585    | .                  | .                  | .      |
| .            | .                  | .                  | .      |
| .            | .                  | .                  | .      |
| Vv07g0586    | Tc01_g032620       | Gorai.007G119400.1 | Gorai. |
| 008G136100.1 | .                  | Gorai.004G146700.1 | .      |
| .            | .                  | .                  | .      |
| .            | .                  | .                  | .      |
| Vv07g0587    | Tc01_g032630       | Gorai.007G119300.1 | .      |
| .            | .                  | .                  | .      |
| .            | .                  | .                  | .      |
| Vv07g0588    | Tc01_g032640       | Gorai.008G136000.1 | .      |
| .            | .                  | .                  | .      |
| .            | .                  | .                  | .      |

|                    |                    |                    |                    |           |           |   |
|--------------------|--------------------|--------------------|--------------------|-----------|-----------|---|
| Vv07g0589          | Tc01_g032650       | .                  | .                  | .         | .         | . |
| .                  | .                  | .                  | .                  | .         | .         | . |
| .                  | .                  | .                  | .                  | .         | .         | . |
| Vv07g0590          | Tc01_g032660       | Gorai.007G119200.1 |                    | Gorai.    |           |   |
| 008G135900.1       | .                  | Gorai.004G146800.1 |                    | Vv05g0266 |           |   |
|                    | Tc04_g030460       | Gorai.005G071300.1 |                    | .         |           | . |
| .                  | Vv14g0055          | Tc04_g030460       | .                  | .         |           | . |
| Gorai.007G119200.1 | .                  | .                  | .                  | .         |           | . |
| Vv07g0591          | Tc01_g032690       | .                  | .                  | .         |           | . |
| .                  | .                  | .                  | .                  | .         |           | . |
| .                  | .                  | .                  | .                  | .         |           | . |
| Vv07g0592          | Tc01_g032710       | .                  | .                  | .         |           | . |
| .                  | .                  | .                  | .                  | .         |           | . |
| .                  | .                  | .                  | .                  | .         |           | . |
| Vv07g0593          | Tc01_g032720       |                    | Gorai.008G135700.1 |           |           | . |
| .                  | Vv05g0270          |                    | Tc04_g030500       | .         |           | . |
| Gorai.005G071400.1 | .                  | .                  | .                  | .         |           | . |
| .                  | .                  | .                  | .                  | .         |           | . |
| Vv07g0594          | .                  | .                  | .                  | .         |           | . |
| .                  | .                  | .                  | .                  | .         |           | . |
| .                  | .                  | .                  | .                  | .         |           | . |
| Vv07g0595          | Tc01_g032730       | .                  | Gorai.008G135600.1 |           |           | . |
| .                  | .                  | .                  | .                  | .         |           | . |
| .                  | .                  | .                  | .                  | .         |           | . |
| Vv07g0596          | .                  | .                  | .                  | .         |           | . |
| Vv05g0273          | Tc04_g030540       | .                  | .                  | .         |           | . |
| .                  | .                  | .                  | .                  | .         |           | . |
| Vv07g0597          | .                  | .                  | .                  | .         |           | . |
| .                  | .                  | .                  | .                  | .         | Vv14g0049 | . |
| .                  | Gorai.013G131200.1 | .                  | .                  | .         |           | . |
| Vv07g0598          | Tc01_g032740       | .                  | Gorai.008G135500.1 |           |           | . |
| .                  | .                  | .                  | .                  | .         |           | . |
| .                  | Vv14g0046          | .                  | .                  | .         |           | . |
| .                  | .                  | .                  | .                  | .         |           | . |
| Vv07g0599          | .                  | Gorai.007G118900.1 | .                  | .         |           | . |
| .                  | .                  | .                  | .                  | .         |           | . |
| .                  | .                  | .                  | .                  | .         |           | . |
| Vv07g0600          | .                  | .                  | .                  | .         |           | . |
| .                  | .                  | .                  | .                  | .         |           | . |
| .                  | .                  | .                  | .                  | .         |           | . |
| Vv07g0601          | Tc01_g008560       | .                  | .                  | .         |           | . |
| .                  | .                  | .                  | .                  | .         |           | . |
| .                  | .                  | .                  | .                  | .         |           | . |
| Vv07g0602          | .                  | .                  | .                  | .         |           | . |
| .                  | .                  | .                  | .                  | .         |           | . |
| .                  | .                  | .                  | .                  | .         |           | . |
| Vv07g0603          | .                  | Gorai.007G118800.1 | .                  | .         |           | . |
| .                  | .                  | .                  | .                  | .         |           | . |
| .                  | .                  | .                  | .                  | .         |           | . |
| Vv07g0604          | .                  | .                  | .                  | .         |           | . |

|           |                    |                    |                    |   |   |   |   |
|-----------|--------------------|--------------------|--------------------|---|---|---|---|
| .         | .                  | .                  | .                  | . | . | . | . |
| .         | .                  | .                  | .                  | . | . | . | . |
| Vv07g0605 | .                  | .                  | .                  | . | . | . | . |
| .         | .                  | .                  | .                  | . | . | . | . |
| Vv07g0606 | .                  | .                  | .                  | . | . | . | . |
| .         | .                  | .                  | .                  | . | . | . | . |
| Vv07g0607 | .                  | .                  | .                  | . | . | . | . |
| .         | .                  | .                  | .                  | . | . | . | . |
| Vv07g0608 | .                  | .                  | .                  | . | . | . | . |
| .         | .                  | .                  | .                  | . | . | . | . |
| Vv07g0609 | .                  | .                  | .                  | . | . | . | . |
| .         | .                  | .                  | .                  | . | . | . | . |
| Vv07g0610 | .                  | Gorai.007G118600.1 | .                  | . | . | . | . |
| .         | .                  | .                  | .                  | . | . | . | . |
| Vv07g0611 | .                  | .                  | .                  | . | . | . | . |
| .         | .                  | .                  | .                  | . | . | . | . |
| Vv07g0612 | .                  | .                  | .                  | . | . | . | . |
| .         | .                  | .                  | .                  | . | . | . | . |
| Vv07g0613 | .                  | .                  | .                  | . | . | . | . |
| .         | .                  | .                  | .                  | . | . | . | . |
| Vv07g0614 | .                  | .                  | .                  | . | . | . | . |
| .         | .                  | .                  | .                  | . | . | . | . |
| Vv07g0615 | .                  | .                  | .                  | . | . | . | . |
| .         | .                  | .                  | .                  | . | . | . | . |
| Vv07g0616 | .                  | Gorai.007G118500.1 | .                  | . | . | . | . |
| .         | .                  | .                  | .                  | . | . | . | . |
| Vv07g0617 | .                  | .                  | .                  | . | . | . | . |
| Vv05g0304 | .                  | .                  | .                  | . | . | . | . |
| .         | .                  | .                  | .                  | . | . | . | . |
| Vv07g0618 | .                  | .                  | .                  | . | . | . | . |
| .         | .                  | .                  | .                  | . | . | . | . |
| Vv07g0619 | .                  | Gorai.007G118400.1 | .                  | . | . | . | . |
| .         | Vv05g0305          | .                  | .                  | . | . | . | . |
| .         | Vv14g0027          | Tc05_g004610       | Gorai.013G131600.1 | . | . | . | . |
| .         | Gorai.013G211000.1 | .                  | .                  | . | . | . | . |
| Vv07g0620 | .                  | Gorai.007G118300.1 | .                  | . | . | . | . |
| .         | .                  | .                  | .                  | . | . | . | . |

|                    |                    |                    |        |   |        |   |
|--------------------|--------------------|--------------------|--------|---|--------|---|
| Vv07g0621          | Tc01_g040640       | .                  | .      | . | .      | . |
| .                  | .                  | .                  | .      | . | .      | . |
| Vv07g0622          | Tc01_g008850       | .                  | .      | . | .      | . |
| .                  | .                  | .                  | .      | . | .      | . |
| Vv07g0623          | .                  | .                  | .      | . | .      | . |
| .                  | .                  | .                  | .      | . | .      | . |
| Vv07g0624          | .                  | .                  | .      | . | .      | . |
| .                  | .                  | .                  | .      | . | .      | . |
| Vv07g0625          | Tc01_g040930       | Gorai.007G118100.1 | .      | . | .      | . |
| .                  | .                  | .                  | .      | . | .      | . |
| Vv07g0626          | .                  | Gorai.007G117900.1 | .      | . | .      | . |
| .                  | .                  | .                  | .      | . | .      | . |
| Vv07g0627          | .                  | Gorai.007G117800.1 | .      | . | .      | . |
| .                  | .                  | .                  | .      | . | .      | . |
| Vv07g0628          | .                  | Gorai.007G117700.1 | .      | . | .      | . |
| .                  | .                  | .                  | .      | . | .      | . |
| Vv07g0629          | .                  | Gorai.007G117600.1 | .      | . | .      | . |
| .                  | .                  | .                  | .      | . | .      | . |
| Vv07g0630          | Tc01_g032940       | Gorai.007G117200.1 | Gorai. | . | .      | . |
| 008G134300.1       | .                  | Vv05g0165          | .      | . | .      | . |
| Tc04_g029800       | Gorai.006G265200.1 | Gorai.005G068100.1 | .      | . | .      | . |
| Gorai.011G201800.1 | .                  | .                  | .      | . | .      | . |
| Vv07g0631          | Tc01_g037710       | .                  | .      | . | .      | . |
| .                  | .                  | .                  | .      | . | .      | . |
| Vv07g0632          | .                  | .                  | .      | . | Gorai. | . |
| 004G147300.1       | .                  | .                  | .      | . | .      | . |
| Vv07g0633          | .                  | Gorai.007G117100.1 | .      | . | .      | . |
| .                  | .                  | .                  | .      | . | .      | . |
| Vv07g0634          | .                  | .                  | .      | . | .      | . |
| .                  | .                  | .                  | .      | . | .      | . |
| Vv07g0635          | .                  | .                  | .      | . | .      | . |
| .                  | .                  | .                  | .      | . | .      | . |
| Vv07g0636          | .                  | .                  | .      | . | .      | . |
| .                  | .                  | .                  | .      | . | .      | . |

|           |                    |              |                    |   |   |   |
|-----------|--------------------|--------------|--------------------|---|---|---|
| Vv07g0637 | .                  | .            | Gorai.007G117000.1 | . | . | . |
| .         | .                  | .            | .                  | . | . | . |
| Vv07g0638 | .                  | .            | Gorai.007G116900.1 | . | . | . |
| .         | .                  | .            | .                  | . | . | . |
| Vv07g0639 | .                  | .            | .                  | . | . | . |
| .         | .                  | .            | .                  | . | . | . |
| Vv07g0640 | .                  | .            | .                  | . | . | . |
| .         | .                  | .            | .                  | . | . | . |
| Vv07g0641 | Tc01_g009040       | .            | .                  | . | . | . |
| .         | .                  | .            | .                  | . | . | . |
| Vv07g0642 | .                  | .            | Gorai.007G116600.1 | . | . | . |
| .         | .                  | .            | .                  | . | . | . |
| Vv07g0643 | .                  | .            | Gorai.007G116500.1 | . | . | . |
| .         | .                  | .            | .                  | . | . | . |
| Vv07g0644 | .                  | .            | .                  | . | . | . |
| .         | .                  | .            | .                  | . | . | . |
| Vv07g0645 | .                  | .            | Gorai.007G116400.1 | . | . | . |
| .         | .                  | .            | .                  | . | . | . |
| Vv07g0646 | .                  | .            | Gorai.007G116300.1 | . | . | . |
| .         | .                  | .            | .                  | . | . | . |
| Vv07g0647 | .                  | .            | .                  | . | . | . |
| .         | .                  | .            | .                  | . | . | . |
| Vv07g0648 | Tc01_g037910       | .            | .                  | . | . | . |
|           | Vv05g0148          | Tc04_g029610 | .                  | . | . | . |
|           | Gorai.002G030400.1 | .            | .                  | . | . | . |
| .         | .                  | .            | .                  | . | . | . |
| Vv07g0649 | .                  | .            | .                  | . | . | . |
| .         | .                  | .            | .                  | . | . | . |
| Vv07g0650 | Tc01_g037920       | .            | Gorai.008G113200.1 | . | . | . |
| .         | .                  | .            | .                  | . | . | . |
| Vv07g0651 | .                  | .            | .                  | . | . | . |
| .         | .                  | .            | .                  | . | . | . |
| Vv07g0652 | .                  | .            | .                  | . | . | . |
| .         | .                  | .            | .                  | . | . | . |
| .         | .                  | .            | .                  | . | . | . |

|                    |              |                    |                    |   |
|--------------------|--------------|--------------------|--------------------|---|
| Vv07g0653          | Tc01_g033200 | .                  | Gorai.008G133300.1 | . |
| .                  | .            | .                  | .                  | . |
| .                  | .            | .                  | .                  | . |
| Vv07g0654          | Tc01_g033210 | .                  | .                  | . |
| .                  | .            | .                  | .                  | . |
| .                  | .            | .                  | .                  | . |
| Vv07g0655          | Tc01_g033230 | .                  | .                  | . |
| .                  | .            | .                  | .                  | . |
| .                  | .            | .                  | .                  | . |
| Vv07g0656          | Tc01_g033240 | .                  | .                  | . |
| Gorai.004G148300.1 | .            | .                  | .                  | . |
| .                  | .            | .                  | .                  | . |
| Vv07g0657          | .            | .                  | .                  | . |
| .                  | .            | .                  | .                  | . |
| .                  | .            | .                  | .                  | . |
| Vv07g0658          | Tc01_g033250 | Gorai.007G115700.1 | .                  | . |
| .                  | .            | .                  | .                  | . |
| .                  | .            | .                  | .                  | . |
| Vv07g0659          | Tc01_g033270 | Gorai.007G115600.1 | .                  | . |
| .                  | .            | .                  | .                  | . |
| .                  | .            | .                  | .                  | . |
| Vv07g0660          | Tc01_g033290 | Gorai.007G115300.1 | .                  | . |
| .                  | .            | .                  | .                  | . |
| .                  | .            | .                  | .                  | . |
| Vv07g0661          | .            | .                  | .                  | . |
| .                  | .            | .                  | .                  | . |
| .                  | .            | .                  | .                  | . |
| Vv07g0662          | .            | .                  | .                  | . |
| .                  | .            | .                  | .                  | . |
| .                  | .            | .                  | .                  | . |
| Vv07g0663          | .            | .                  | .                  | . |
| .                  | .            | .                  | .                  | . |
| .                  | .            | .                  | .                  | . |
| Vv07g0664          | .            | .                  | .                  | . |
| .                  | .            | .                  | .                  | . |
| .                  | .            | .                  | .                  | . |
| Vv07g0665          | .            | .                  | .                  | . |
| .                  | .            | .                  | .                  | . |
| .                  | .            | .                  | .                  | . |
| Vv07g0666          | .            | .                  | .                  | . |
| .                  | .            | .                  | .                  | . |
| .                  | .            | .                  | .                  | . |
| Vv07g0667          | .            | .                  | .                  | . |
| .                  | .            | .                  | .                  | . |
| .                  | .            | .                  | .                  | . |
| Vv07g0668          | .            | .                  | .                  | . |
| .                  | .            | .                  | .                  | . |
| .                  | .            | .                  | .                  | . |
| Vv07g0669          | .            | .                  | .                  | . |
| .                  | .            | .                  | .                  | . |

|              |   |                    |   |   |                    |        |   |
|--------------|---|--------------------|---|---|--------------------|--------|---|
| Vv07g0670    | . | .                  | . | . | .                  | .      | . |
| .            | . | .                  | . | . | .                  | .      | . |
| Vv07g0671    | . | .                  | . | . | .                  | .      | . |
| .            | . | .                  | . | . | .                  | .      | . |
| Vv07g0672    | . | .                  | . | . | .                  | .      | . |
| .            | . | .                  | . | . | .                  | .      | . |
| Vv07g0673    | . | .                  | . | . | .                  | .      | . |
| .            | . | .                  | . | . | .                  | .      | . |
| Vv07g0674    | . | .                  | . | . | .                  | .      | . |
| .            | . | .                  | . | . | .                  | .      | . |
| Vv07g0675    | . | .                  | . | . | .                  | .      | . |
| .            | . | .                  | . | . | .                  | .      | . |
| Vv07g0676    | . | .                  | . | . | .                  | .      | . |
| .            | . | .                  | . | . | .                  | .      | . |
| Vv07g0677    | . | .                  | . | . | .                  | .      | . |
| .            | . | .                  | . | . | .                  | .      | . |
| Vv07g0678    | . | .                  | . | . | .                  | .      | . |
| .            | . | .                  | . | . | .                  | .      | . |
| Vv07g0679    | . | .                  | . | . | .                  | .      | . |
| .            | . | .                  | . | . | .                  | .      | . |
| Vv07g0680    | . | .                  | . | . | .                  | .      | . |
| .            | . | .                  | . | . | .                  | .      | . |
| Vv07g0681    | . | Gorai.007G113800.1 | . | . | .                  | .      | . |
| .            | . | .                  | . | . | .                  | .      | . |
| Vv07g0682    | . | .                  | . | . | Gorai.004G073600.1 | .      | . |
| .            | . | .                  | . | . | .                  | .      | . |
| Vv07g0683    | . | .                  | . | . | .                  | .      | . |
| .            | . | .                  | . | . | .                  | .      | . |
| Vv07g0684    | . | .                  | . | . | .                  | Gorai. | . |
| 004G219700.1 | . | .                  | . | . | .                  | .      | . |
| .            | . | .                  | . | . | .                  | .      | . |
| Vv07g0685    | . | .                  | . | . | .                  | .      | . |
| .            | . | .                  | . | . | .                  | .      | . |
| Vv07g0686    | . | .                  | . | . | .                  | .      | . |

|                    |              |                    |                    |   |                    |   |   |
|--------------------|--------------|--------------------|--------------------|---|--------------------|---|---|
| .                  | .            | .                  | .                  | . | .                  | . | . |
| .                  | .            | .                  | .                  | . | .                  | . | . |
| Vv07g0687          | .            | .                  | .                  | . | .                  | . | . |
| .                  | .            | .                  | .                  | . | .                  | . | . |
| .                  | .            | .                  | .                  | . | .                  | . | . |
| Vv07g0688          | Tc01_g037490 | Gorai.007G144400.1 | Gorai.             | . | .                  | . | . |
| 008G114300.1       | .            | Gorai.004G073300.1 | Gorai.004G219900.1 | . | .                  | . | . |
| .                  | .            | .                  | .                  | . | .                  | . | . |
| .                  | .            | .                  | .                  | . | .                  | . | . |
| Vv07g0689          | Tc01_g037470 | Gorai.007G144500.1 | Gorai.             | . | .                  | . | . |
| 008G114400.1       | .            | Gorai.004G073200.1 | Gorai.004G220000.1 | . | .                  | . | . |
| .                  | .            | .                  | .                  | . | .                  | . | . |
| .                  | .            | .                  | .                  | . | .                  | . | . |
| Vv07g0690          | .            | .                  | .                  | . | .                  | . | . |
| .                  | .            | .                  | .                  | . | .                  | . | . |
| .                  | .            | .                  | .                  | . | .                  | . | . |
| Vv07g0691          | .            | .                  | .                  | . | .                  | . | . |
| .                  | .            | .                  | .                  | . | .                  | . | . |
| .                  | .            | .                  | .                  | . | .                  | . | . |
| Vv07g0692          | .            | .                  | .                  | . | .                  | . | . |
| .                  | .            | .                  | .                  | . | .                  | . | . |
| .                  | .            | .                  | .                  | . | .                  | . | . |
| Vv07g0693          | .            | .                  | .                  | . | .                  | . | . |
| .                  | .            | .                  | .                  | . | .                  | . | . |
| .                  | .            | .                  | .                  | . | .                  | . | . |
| Vv07g0694          | .            | .                  | .                  | . | Gorai.004G073000.1 | . | . |
| .                  | .            | .                  | .                  | . | .                  | . | . |
| .                  | .            | .                  | .                  | . | .                  | . | . |
| Vv07g0695          | Tc01_g033420 | .                  | Gorai.008G132500.1 | . | .                  | . | . |
| .                  | .            | Vv05g0773          | Tc04_g025340       | . | .                  | . | . |
| Gorai.005G049000.1 | .            | .                  | .                  | . | .                  | . | . |
| .                  | .            | .                  | .                  | . | .                  | . | . |
| Vv07g0696          | .            | Gorai.007G145100.1 | .                  | . | .                  | . | . |
| .                  | .            | .                  | .                  | . | .                  | . | . |
| .                  | .            | .                  | .                  | . | .                  | . | . |
| Vv07g0697          | .            | Gorai.007G145200.1 | .                  | . | .                  | . | . |
| Gorai.004G072800.1 | .            | Gorai.004G220200.1 | .                  | . | .                  | . | . |
| .                  | .            | .                  | .                  | . | .                  | . | . |
| .                  | .            | .                  | .                  | . | .                  | . | . |
| Vv07g0698          | .            | Gorai.007G145300.1 | .                  | . | .                  | . | . |
| Gorai.004G070200.1 | .            | Gorai.004G220300.1 | .                  | . | .                  | . | . |
| .                  | .            | .                  | .                  | . | .                  | . | . |
| .                  | .            | .                  | .                  | . | .                  | . | . |
| Vv07g0699          | .            | Gorai.007G145400.1 | .                  | . | .                  | . | . |
| .                  | .            | .                  | .                  | . | .                  | . | . |
| .                  | .            | .                  | .                  | . | .                  | . | . |
| Vv07g0700          | .            | .                  | .                  | . | .                  | . | . |
| .                  | .            | .                  | .                  | . | .                  | . | . |
| .                  | .            | .                  | .                  | . | .                  | . | . |
| Vv07g0701          | Tc01_g033570 | .                  | .                  | . | .                  | . | . |



|                    |                    |                    |        |   |                    |   |   |
|--------------------|--------------------|--------------------|--------|---|--------------------|---|---|
| Gorai.004G220500.1 | .                  | .                  | .      | . | .                  | . | . |
| Vv07g0702          | .                  | .                  | .      | . | .                  | . | . |
| Vv07g0703          | Tc01_g037120       | .                  | .      | . | .                  | . | . |
| Vv07g0704          | .                  | .                  | .      | . | .                  | . | . |
| Vv07g0705          | Gorai.007G145600.1 | .                  | .      | . | .                  | . | . |
| Vv07g0706          | .                  | .                  | .      | . | .                  | . | . |
| Vv07g0707          | Tc01_g004930       | .                  | .      | . | .                  | . | . |
| Vv07g0708          | .                  | .                  | .      | . | .                  | . | . |
| Vv07g0709          | Gorai.007G145700.1 | .                  | .      | . | .                  | . | . |
| Vv07g0710          | .                  | .                  | .      | . | .                  | . | . |
| Vv07g0711          | .                  | .                  | .      | . | .                  | . | . |
| Vv07g0712          | Tc01_g004990       | .                  | .      | . | .                  | . | . |
| Vv07g0713          | Tc01_g036820       | Gorai.007G145800.1 | Gorai. | . | .                  | . | . |
| 008G116800.1       | Gorai.004G057000.1 | Gorai.004G220800.1 | Gorai. | . | .                  | . | . |
| Vv07g0714          | .                  | .                  | .      | . | Gorai.004G057100.1 | . | . |
| Vv07g0715          | .                  | .                  | .      | . | .                  | . | . |
| Vv07g0716          | .                  | .                  | .      | . | .                  | . | . |
| Vv07g0717          | Tc01_g003460       | Gorai.007G146000.1 | .      | . | .                  | . | . |
| .                  | Vv05g0813          | Tc04_g025470       | .      | . | .                  | . | . |

|              |                    |   |   |   |                    |   |
|--------------|--------------------|---|---|---|--------------------|---|
|              | Gorai.006G072100.1 | . | . | . | .                  | . |
| Vv07g0718    | .                  | . | . | . | .                  | . |
| Vv07g0719    | .                  | . | . | . | .                  | . |
| Vv05g0816    | Tc04_g025480       | . | . | . | .                  | . |
| Vv07g0720    | .                  | . | . | . | .                  | . |
| Vv07g0721    | .                  | . | . | . | Gorai.             | . |
| 004G220900.1 | Vv05g0823          | . | . | . | Gorai.005G050100.1 | . |
| Vv07g0722    | .                  | . | . | . | .                  | . |
| Vv07g0723    | .                  | . | . | . | .                  | . |
| Vv07g0724    | .                  | . | . | . | .                  | . |
| Vv07g0725    | .                  | . | . | . | .                  | . |
| Vv07g0726    | .                  | . | . | . | .                  | . |
| Vv07g0727    | .                  | . | . | . | Gorai.             | . |
| 004G221000.1 | .                  | . | . | . | .                  | . |
| Vv07g0728    | .                  | . | . | . | .                  | . |
| Vv07g0729    | .                  | . | . | . | Gorai.004G057200.1 | . |
| Vv07g0730    | .                  | . | . | . | .                  | . |
| Vv07g0731    | .                  | . | . | . | .                  | . |
| Vv07g0732    | .                  | . | . | . | .                  | . |
| Vv07g0733    | .                  | . | . | . | .                  | . |

|                    |                    |                    |                    |   |   |   |   |
|--------------------|--------------------|--------------------|--------------------|---|---|---|---|
| Vv07g0734          | .                  | .                  | .                  | . | . | . | . |
| .                  | .                  | .                  | .                  | . | . | . | . |
| Vv07g0735          | Tc01_g003270       | .                  | Gorai.007G146400.1 | . | . | . | . |
| .                  | .                  | .                  | .                  | . | . | . | . |
| Vv07g0736          | .                  | .                  | .                  | . | . | . | . |
| .                  | .                  | .                  | .                  | . | . | . | . |
| Vv07g0737          | .                  | .                  | .                  | . | . | . | . |
| .                  | .                  | .                  | .                  | . | . | . | . |
| Vv07g0738          | .                  | Gorai.007G146500.1 | .                  | . | . | . | . |
| .                  | .                  | .                  | .                  | . | . | . | . |
| Vv07g0739          | .                  | .                  | .                  | . | . | . | . |
| .                  | .                  | .                  | .                  | . | . | . | . |
| Vv07g0740          | .                  | .                  | .                  | . | . | . | . |
| .                  | .                  | .                  | .                  | . | . | . | . |
| Vv07g0741          | .                  | .                  | .                  | . | . | . | . |
| .                  | .                  | .                  | .                  | . | . | . | . |
| Vv07g0742          | .                  | Gorai.007G146600.1 | .                  | . | . | . | . |
| Gorai.004G221100.1 | .                  | .                  | .                  | . | . | . | . |
| .                  | .                  | .                  | .                  | . | . | . | . |
| Vv07g0743          | Tc01_g036810       | .                  | Gorai.008G116900.1 | . | . | . | . |
| .                  | .                  | .                  | .                  | . | . | . | . |
| Vv07g0744          | .                  | Gorai.007G147000.1 | .                  | . | . | . | . |
| Gorai.004G221200.1 | .                  | Vv05g0839          | Tc04_g025630       | . | . | . | . |
| Gorai.006G253300.1 | Gorai.005G050400.1 | .                  | Gorai.             | . | . | . | . |
| 011G174900.1       | .                  | .                  | .                  | . | . | . | . |
| .                  | .                  | .                  | .                  | . | . | . | . |
| Vv07g0745          | .                  | .                  | .                  | . | . | . | . |
| .                  | .                  | .                  | .                  | . | . | . | . |
| Vv07g0746          | .                  | .                  | .                  | . | . | . | . |
| .                  | .                  | .                  | .                  | . | . | . | . |
| Vv07g0747          | Tc01_g025290       | Gorai.007G147100.1 | .                  | . | . | . | . |
| .                  | .                  | .                  | .                  | . | . | . | . |
| Vv07g0748          | Tc01_g025300       | .                  | .                  | . | . | . | . |
| .                  | .                  | .                  | .                  | . | . | . | . |
| Vv07g0749          | Tc01_g025330       | Gorai.007G147300.1 | .                  | . | . | . | . |

|                    |                    |                    |   |                    |   |   |   |
|--------------------|--------------------|--------------------|---|--------------------|---|---|---|
| .                  | .                  | .                  | . | .                  | . | . | . |
| .                  | .                  | .                  | . | .                  | . | . | . |
| Vv07g0750          | Tc01_g025350       | Gorai.007G147500.1 | . | .                  | . | . | . |
| .                  | .                  | .                  | . | .                  | . | . | . |
| .                  | .                  | .                  | . | .                  | . | . | . |
| Vv07g0751          | Tc01_g025360       | .                  | . | .                  | . | . | . |
| Vv05g0841          | Tc04_g025640       | .                  | . | Gorai.005G050500.1 | . | . | . |
| .                  | Gorai.011G175000.1 | .                  | . | .                  | . | . | . |
| .                  | .                  | .                  | . | .                  | . | . | . |
| Vv07g0752          | Tc01_g025370       | Gorai.007G147600.1 | . | .                  | . | . | . |
| .                  | .                  | .                  | . | .                  | . | . | . |
| .                  | .                  | .                  | . | .                  | . | . | . |
| Vv07g0753          | Tc01_g025390       | .                  | . | .                  | . | . | . |
| .                  | .                  | .                  | . | .                  | . | . | . |
| .                  | .                  | .                  | . | .                  | . | . | . |
| Vv07g0754          | Tc01_g025400       | .                  | . | .                  | . | . | . |
| Gorai.004G221400.1 | .                  | .                  | . | .                  | . | . | . |
| .                  | .                  | .                  | . | .                  | . | . | . |
| Vv07g0755          | Tc01_g025410       | .                  | . | .                  | . | . | . |
| .                  | .                  | .                  | . | .                  | . | . | . |
| .                  | .                  | .                  | . | .                  | . | . | . |
| Vv07g0756          | Tc01_g025420       | Gorai.007G147700.1 | . | .                  | . | . | . |
| .                  | .                  | .                  | . | .                  | . | . | . |
| .                  | .                  | .                  | . | .                  | . | . | . |
| Vv07g0757          | Tc01_g025440       | .                  | . | .                  | . | . | . |
| .                  | .                  | .                  | . | .                  | . | . | . |
| .                  | .                  | .                  | . | .                  | . | . | . |
| Vv07g0758          | Tc01_g025460       | Gorai.007G147800.1 | . | .                  | . | . | . |
| .                  | Gorai.004G221700.1 | .                  | . | .                  | . | . | . |
| .                  | .                  | .                  | . | .                  | . | . | . |
| .                  | .                  | .                  | . | .                  | . | . | . |
| Vv07g0759          | Tc01_g025470       | .                  | . | .                  | . | . | . |
| .                  | .                  | .                  | . | .                  | . | . | . |
| .                  | .                  | .                  | . | .                  | . | . | . |
| Vv07g0760          | Tc01_g025500       | .                  | . | .                  | . | . | . |
| .                  | .                  | .                  | . | .                  | . | . | . |
| .                  | .                  | .                  | . | .                  | . | . | . |
| Vv07g0761          | Tc01_g025520       | Gorai.007G148000.1 | . | .                  | . | . | . |
| .                  | .                  | .                  | . | .                  | . | . | . |
| .                  | .                  | .                  | . | .                  | . | . | . |
| Vv07g0762          | Tc01_g025530       | Gorai.007G148100.1 | . | .                  | . | . | . |
| .                  | Vv05g0858          | Tc04_g025810       | . | .                  | . | . | . |
| .                  | Gorai.011G176800.1 | .                  | . | .                  | . | . | . |
| .                  | .                  | .                  | . | .                  | . | . | . |
| Vv07g0763          | Tc01_g025540       | .                  | . | .                  | . | . | . |
| .                  | .                  | .                  | . | .                  | . | . | . |
| .                  | .                  | .                  | . | .                  | . | . | . |
| Vv07g0764          | Tc01_g025560       | Gorai.007G148200.1 | . | .                  | . | . | . |
| .                  | .                  | .                  | . | .                  | . | . | . |
| .                  | .                  | .                  | . | .                  | . | . | . |

|              |                    |                    |   |   |   |        |   |
|--------------|--------------------|--------------------|---|---|---|--------|---|
| Vv07g0765    | .                  | .                  | . | . | . | .      | . |
| .            | .                  | .                  | . | . | . | .      | . |
| Vv07g0766    | Tc01_g025580       | .                  | . | . | . | .      | . |
| Vv05g0864    | Tc04_g025850       | Gorai.006G252500.1 | . | . | . | .      | . |
| .            | Gorai.011G177100.1 | .                  | . | . | . | .      | . |
| Vv07g0767    | Tc01_g025590       | .                  | . | . | . | .      | . |
| .            | .                  | .                  | . | . | . | .      | . |
| Vv07g0768    | .                  | .                  | . | . | . | .      | . |
| .            | .                  | .                  | . | . | . | .      | . |
| Vv07g0769    | Tc01_g025600       | .                  | . | . | . | .      | . |
| .            | .                  | .                  | . | . | . | .      | . |
| Vv07g0770    | Tc01_g025610       | Gorai.007G148300.1 | . | . | . | .      | . |
| .            | Gorai.004G221900.1 | Vv05g0868          | . | . | . | .      | . |
| Tc04_g025900 | Gorai.006G252200.1 | Gorai.005G051600.1 | . | . | . | .      | . |
| .            | .                  | .                  | . | . | . | .      | . |
| Vv07g0771    | .                  | .                  | . | . | . | .      | . |
| .            | .                  | .                  | . | . | . | .      | . |
| Vv07g0772    | Tc01_g025620       | Gorai.007G148500.1 | . | . | . | .      | . |
| .            | Gorai.004G222000.1 | Vv05g0870          | . | . | . | .      | . |
| Tc04_g025920 | Gorai.005G051900.1 | .                  | . | . | . | .      | . |
| .            | .                  | .                  | . | . | . | .      | . |
| Vv07g0773    | .                  | .                  | . | . | . | .      | . |
| .            | .                  | .                  | . | . | . | .      | . |
| Vv07g0774    | .                  | .                  | . | . | . | .      | . |
| .            | .                  | .                  | . | . | . | .      | . |
| Vv07g0775    | .                  | .                  | . | . | . | .      | . |
| .            | .                  | .                  | . | . | . | .      | . |
| Vv07g0776    | Tc01_g025640       | Gorai.007G148600.1 | . | . | . | .      | . |
| .            | Gorai.004G061600.1 | .                  | . | . | . | .      | . |
| .            | .                  | .                  | . | . | . | .      | . |
| Vv07g0777    | Tc01_g025650       | .                  | . | . | . | Gorai. | . |
| 004G057300.1 | .                  | .                  | . | . | . | .      | . |
| Vv07g0778    | .                  | .                  | . | . | . | .      | . |
| .            | .                  | .                  | . | . | . | .      | . |
| Vv07g0779    | .                  | .                  | . | . | . | .      | . |
| Vv05g0876    | Tc04_g025950       | Gorai.005G052100.1 | . | . | . | .      | . |
| .            | .                  | .                  | . | . | . | .      | . |

|                    |              |   |                    |   |
|--------------------|--------------|---|--------------------|---|
| Vv07g0780          | Tc01_g025670 | . | Gorai.001G238400.1 | . |
| .                  | .            | . | .                  | . |
| Vv07g0781          | .            | . | .                  | . |
| .                  | .            | . | .                  | . |
| Vv07g0782          | .            | . | .                  | . |
| .                  | .            | . | .                  | . |
| Vv07g0783          | Tc01_g025680 | . | Gorai.001G238300.1 | . |
| .                  | Vv05g0878    | . | Tc04_g025970       | . |
| Gorai.005G052500.1 | .            | . | .                  | . |
| Vv07g0784          | .            | . | .                  | . |
| .                  | .            | . | .                  | . |
| Vv07g0785          | .            | . | Gorai.004G061400.1 | . |
| .                  | .            | . | .                  | . |
| Vv07g0786          | Tc01_g025690 | . | Gorai.007G148800.1 | . |
| .                  | .            | . | .                  | . |
| Vv07g0787          | .            | . | .                  | . |
| .                  | .            | . | .                  | . |
| Vv07g0788          | .            | . | .                  | . |
| .                  | .            | . | .                  | . |
| Vv07g0789          | .            | . | .                  | . |
| .                  | .            | . | .                  | . |
| Vv07g0790          | Tc01_g025700 | . | .                  | . |
| .                  | .            | . | .                  | . |
| Vv07g0791          | .            | . | .                  | . |
| .                  | .            | . | .                  | . |
| Vv07g0792          | Tc01_g025760 | . | .                  | . |
| .                  | .            | . | .                  | . |
| Vv07g0793          | .            | . | .                  | . |
| .                  | .            | . | .                  | . |
| Vv07g0794          | .            | . | .                  | . |
| .                  | .            | . | .                  | . |
| Vv07g0795          | .            | . | .                  | . |
| .                  | .            | . | .                  | . |
| .                  | .            | . | .                  | . |

|                    |                    |                    |                    |   |
|--------------------|--------------------|--------------------|--------------------|---|
| Vv07g0796          | Tc01_g025770       | .                  | Gorai.001G238100.1 | . |
| .                  | .                  | .                  | .                  | . |
| .                  | .                  | .                  | .                  | . |
| Vv07g0797          | Tc01_g025780       | Gorai.007G149100.1 | .                  | . |
| .                  | .                  | .                  | .                  | . |
| .                  | .                  | .                  | .                  | . |
| Vv07g0798          | Tc01_g025830       | .                  | .                  | . |
| .                  | .                  | .                  | .                  | . |
| .                  | .                  | .                  | .                  | . |
| Vv07g0799          | .                  | .                  | .                  | . |
| .                  | .                  | .                  | .                  | . |
| .                  | .                  | .                  | .                  | . |
| Vv07g0800          | Tc01_g025840       | Gorai.007G149200.1 | .                  | . |
| .                  | .                  | .                  | .                  | . |
| .                  | .                  | .                  | .                  | . |
| Vv07g0801          | Tc01_g025870       | Gorai.007G149400.1 | .                  | . |
| .                  | Vv05g0894          | Tc04_g026210       | Gorai.             | . |
| 006G251500.1       | Gorai.005G053300.1 | .                  | .                  | . |
| .                  | .                  | .                  | .                  | . |
| Vv07g0802          | .                  | .                  | .                  | . |
| .                  | .                  | .                  | .                  | . |
| .                  | .                  | .                  | .                  | . |
| Vv07g0803          | Tc01_g025880       | .                  | .                  | . |
| .                  | .                  | .                  | .                  | . |
| .                  | .                  | .                  | .                  | . |
| Vv07g0804          | Tc01_g025890       | Gorai.007G149600.1 | .                  | . |
| .                  | Gorai.004G222200.1 | Vv05g0895          | .                  | . |
| .                  | .                  | .                  | .                  | . |
| .                  | .                  | .                  | .                  | . |
| Vv07g0805          | Tc01_g025940       | .                  | .                  | . |
| .                  | .                  | .                  | .                  | . |
| .                  | .                  | .                  | .                  | . |
| Vv07g0806          | Tc01_g025950       | .                  | .                  | . |
| Gorai.004G222400.1 | Vv05g0904          | Tc04_g026280       | .                  | . |
| .                  | .                  | .                  | .                  | . |
| .                  | .                  | .                  | .                  | . |
| Vv07g0807          | .                  | .                  | .                  | . |
| .                  | .                  | .                  | .                  | . |
| .                  | .                  | .                  | .                  | . |
| Vv07g0808          | .                  | .                  | .                  | . |
| .                  | .                  | .                  | .                  | . |
| .                  | .                  | .                  | .                  | . |
| Vv07g0809          | Tc01_g026000       | Gorai.007G149700.1 | Gorai.             | . |
| 001G237700.1       | .                  | .                  | .                  | . |
| .                  | .                  | .                  | .                  | . |
| .                  | .                  | .                  | .                  | . |
| Vv07g0810          | Tc01_g026020       | Gorai.007G149800.1 | .                  | . |
| Gorai.004G059100.1 | .                  | Vv05g0909          | .                  | . |
| Tc04_g026400       | Gorai.005G054100.1 | .                  | Gorai.             | . |
| 011G179700.1       | .                  | .                  | .                  | . |

|              |                    |                    |                    |   |        |   |   |
|--------------|--------------------|--------------------|--------------------|---|--------|---|---|
| Vv07g0811    | .                  | .                  | .                  | . | .      | . | . |
| .            | .                  | .                  | .                  | . | .      | . | . |
| Vv07g0812    | .                  | .                  | .                  | . | .      | . | . |
| .            | .                  | .                  | .                  | . | .      | . | . |
| Vv07g0813    | .                  | .                  | .                  | . | .      | . | . |
| .            | .                  | .                  | .                  | . | .      | . | . |
| Vv07g0814    | Tc01_g026060       | Gorai.007G149900.1 | .                  | . | .      | . | . |
|              | Gorai.004G057500.1 | .                  | .                  | . | .      | . | . |
| .            | .                  | .                  | .                  | . | .      | . | . |
| Vv07g0815    | Tc01_g026070       | .                  | .                  | . | .      | . | . |
| .            | .                  | .                  | .                  | . | .      | . | . |
| Vv07g0816    | Tc01_g026130       | Gorai.007G150000.1 | .                  | . | .      | . | . |
| .            | Gorai.004G222500.1 | Vv05g0913          | .                  | . | .      | . | . |
| Tc04_g026430 | Gorai.006G250900.1 | .                  | .                  | . | Gorai. | . | . |
| 011G180100.1 | .                  | .                  | .                  | . | .      | . | . |
| .            | .                  | .                  | .                  | . | .      | . | . |
| Vv07g0817    | Tc01_g026140       | .                  | Gorai.001G237400.1 | . | .      | . | . |
| .            | .                  | .                  | .                  | . | .      | . | . |
| Vv07g0818    | .                  | .                  | .                  | . | .      | . | . |
| .            | .                  | .                  | .                  | . | .      | . | . |
| Vv07g0819    | Tc01_g026150       | .                  | .                  | . | .      | . | . |
| .            | .                  | .                  | .                  | . | .      | . | . |
| Vv07g0820    | Tc01_g026160       | .                  | .                  | . | .      | . | . |
| .            | .                  | .                  | .                  | . | .      | . | . |
| Vv07g0821    | Tc01_g026170       | .                  | .                  | . | .      | . | . |
| .            | .                  | .                  | .                  | . | .      | . | . |
| Vv07g0822    | Tc01_g026180       | Gorai.007G150100.1 | .                  | . | .      | . | . |
| .            | .                  | .                  | .                  | . | .      | . | . |
| Vv07g0823    | Tc01_g026200       | Gorai.007G150200.1 | .                  | . | .      | . | . |
| .            | .                  | .                  | .                  | . | .      | . | . |
| Vv07g0824    | Tc01_g028640       | .                  | .                  | . | .      | . | . |
| .            | .                  | .                  | .                  | . | .      | . | . |
| Vv07g0825    | Tc01_g026210       | Gorai.007G150300.1 | .                  | . | .      | . | . |
| .            | .                  | .                  | .                  | . | .      | . | . |
| Vv07g0826    | .                  | .                  | .                  | . | .      | . | . |



|                    |              |                    |                    |   |   |   |
|--------------------|--------------|--------------------|--------------------|---|---|---|
| .                  | .            | .                  | .                  | . | . | . |
| .                  | .            | .                  | .                  | . | . | . |
| Vv07g0827          | Tc01_g026220 | .                  | .                  | . | . | . |
| .                  | .            | .                  | .                  | . | . | . |
| Vv07g0828          | .            | .                  | .                  | . | . | . |
| .                  | .            | .                  | .                  | . | . | . |
| Vv07g0829          | .            | .                  | .                  | . | . | . |
| .                  | .            | .                  | .                  | . | . | . |
| Vv07g0830          | Tc01_g026290 | .                  | Gorai.001G237200.1 | . | . | . |
| .                  | .            | .                  | .                  | . | . | . |
| Vv07g0831          | .            | .                  | .                  | . | . | . |
| .                  | .            | .                  | .                  | . | . | . |
| Vv07g0832          | Tc01_g026300 | Gorai.007G150400.1 | Gorai.             | . | . | . |
| 001G237100.1       | .            | .                  | .                  | . | . | . |
| .                  | .            | .                  | .                  | . | . | . |
| Vv07g0833          | .            | .                  | .                  | . | . | . |
| .                  | .            | .                  | .                  | . | . | . |
| Vv07g0834          | .            | .                  | .                  | . | . | . |
| .                  | .            | .                  | .                  | . | . | . |
| Vv07g0835          | .            | .                  | .                  | . | . | . |
| .                  | .            | .                  | .                  | . | . | . |
| Vv07g0836          | .            | .                  | .                  | . | . | . |
| .                  | .            | .                  | .                  | . | . | . |
| Vv07g0837          | .            | .                  | .                  | . | . | . |
| .                  | .            | .                  | .                  | . | . | . |
| Vv07g0838          | .            | .                  | .                  | . | . | . |
| .                  | .            | .                  | .                  | . | . | . |
| Vv07g0839          | .            | Gorai.007G150500.1 | .                  | . | . | . |
| Gorai.004G057600.1 | .            | .                  | .                  | . | . | . |
| .                  | .            | .                  | .                  | . | . | . |
| Vv07g0840          | .            | .                  | .                  | . | . | . |
| .                  | .            | .                  | .                  | . | . | . |
| Vv07g0841          | .            | Gorai.007G150600.1 | .                  | . | . | . |
| .                  | .            | .                  | .                  | . | . | . |
| Vv07g0842          | Tc01_g007730 | .                  | Gorai.001G236500.1 | . | . | . |

|                    |                    |                    |   |   |   |                    |   |
|--------------------|--------------------|--------------------|---|---|---|--------------------|---|
| .                  | .                  | .                  | . | . | . | .                  | . |
| .                  | .                  | .                  | . | . | . | .                  | . |
| Vv07g0843          | .                  | .                  | . | . | . | .                  | . |
| .                  | .                  | .                  | . | . | . | .                  | . |
| Vv07g0844          | .                  | .                  | . | . | . | .                  | . |
| .                  | .                  | .                  | . | . | . | .                  | . |
| Vv07g0845          | .                  | .                  | . | . | . | .                  | . |
| .                  | .                  | .                  | . | . | . | .                  | . |
| Vv07g0846          | .                  | .                  | . | . | . | Gorai.004G055700.1 | . |
| Gorai.004G222700.1 | .                  | .                  | . | . | . | .                  | . |
| .                  | .                  | .                  | . | . | . | .                  | . |
| Vv07g0847          | .                  | .                  | . | . | . | .                  | . |
| .                  | .                  | .                  | . | . | . | .                  | . |
| Vv07g0848          | .                  | .                  | . | . | . | .                  | . |
| .                  | .                  | .                  | . | . | . | .                  | . |
| Vv07g0849          | .                  | .                  | . | . | . | .                  | . |
| .                  | .                  | .                  | . | . | . | .                  | . |
| Vv07g0850          | Tc01_g028260       | .                  | . | . | . | .                  | . |
| .                  | .                  | .                  | . | . | . | .                  | . |
| Vv07g0851          | .                  | .                  | . | . | . | .                  | . |
| .                  | .                  | .                  | . | . | . | .                  | . |
| Vv07g0852          | Tc01_g007500       | .                  | . | . | . | .                  | . |
| .                  | .                  | .                  | . | . | . | .                  | . |
| Vv07g0853          | .                  | .                  | . | . | . | Gorai.004G052700.1 | . |
| .                  | .                  | .                  | . | . | . | .                  | . |
| Vv07g0854          | .                  | .                  | . | . | . | Gorai.001G236300.1 | . |
| Gorai.004G057700.1 | .                  | .                  | . | . | . | .                  | . |
| .                  | .                  | .                  | . | . | . | .                  | . |
| Vv07g0855          | .                  | .                  | . | . | . | .                  | . |
| .                  | .                  | .                  | . | . | . | .                  | . |
| Vv07g0856          | Tc01_g026670       | Gorai.007G150900.1 | . | . | . | .                  | . |
| .                  | Gorai.004G223100.1 | .                  | . | . | . | .                  | . |
| .                  | .                  | .                  | . | . | . | .                  | . |
| Vv07g0857          | .                  | .                  | . | . | . | .                  | . |
| .                  | .                  | .                  | . | . | . | .                  | . |
| .                  | .                  | .                  | . | . | . | .                  | . |

|              |                    |                    |                    |
|--------------|--------------------|--------------------|--------------------|
| Vv07g0858    | .                  | Gorai.007G151100.1 | Gorai.001G236200.1 |
| .            | .                  | Gorai.004G223200.1 | .                  |
| .            | .                  | .                  | .                  |
| Vv07g0859    | .                  | .                  | .                  |
| .            | .                  | .                  | .                  |
| .            | .                  | .                  | .                  |
| Vv07g0860    | .                  | .                  | .                  |
| .            | .                  | .                  | .                  |
| .            | .                  | .                  | .                  |
| Vv07g0861    | .                  | .                  | .                  |
| .            | .                  | .                  | .                  |
| .            | .                  | .                  | .                  |
| Vv07g0862    | .                  | .                  | .                  |
| .            | .                  | .                  | .                  |
| .            | .                  | .                  | .                  |
| Vv07g0863    | .                  | .                  | .                  |
| .            | .                  | .                  | .                  |
| .            | .                  | .                  | .                  |
| Vv07g0864    | .                  | Gorai.007G151300.1 | Gorai.001G236100.1 |
| .            | .                  | .                  | .                  |
| .            | .                  | .                  | .                  |
| Vv07g0865    | .                  | .                  | .                  |
| .            | .                  | .                  | .                  |
| .            | .                  | .                  | .                  |
| Vv07g0866    | .                  | Gorai.007G151400.1 | Gorai.001G236000.1 |
| .            | .                  | .                  | .                  |
| .            | .                  | .                  | .                  |
| Vv07g0867    | .                  | .                  | .                  |
| .            | .                  | .                  | .                  |
| .            | .                  | .                  | .                  |
| Vv07g0868    | .                  | .                  | .                  |
| .            | .                  | .                  | .                  |
| .            | .                  | .                  | .                  |
| Vv07g0869    | .                  | Gorai.001G235900.1 | .                  |
| .            | .                  | .                  | .                  |
| .            | .                  | .                  | .                  |
| Vv07g0870    | .                  | .                  | .                  |
| .            | .                  | .                  | .                  |
| .            | .                  | .                  | .                  |
| Vv07g0871    | .                  | .                  | Gorai.             |
| 004G223300.1 | .                  | .                  | .                  |
| .            | .                  | .                  | .                  |
| Vv07g0872    | Tc01_g023400       | .                  | Gorai.001G235600.1 |
| .            | .                  | .                  | .                  |
| .            | .                  | .                  | .                  |
| Vv07g0873    | Tc01_g023410       | .                  | Gorai.             |
| 004G057900.1 | Gorai.004G223400.1 | .                  | .                  |
| .            | .                  | .                  | .                  |

|           |                    |                    |                    |   |   |        |   |
|-----------|--------------------|--------------------|--------------------|---|---|--------|---|
| .         | .                  | .                  | .                  | . | . | .      | . |
| .         | .                  | .                  | .                  | . | . | .      | . |
| Vv07g0874 | .                  | .                  | .                  | . | . | .      | . |
| .         | .                  | .                  | .                  | . | . | .      | . |
| Vv07g0875 | .                  | .                  | .                  | . | . | .      | . |
| .         | .                  | .                  | .                  | . | . | .      | . |
| Vv07g0876 | .                  | .                  | .                  | . | . | .      | . |
| .         | .                  | .                  | .                  | . | . | .      | . |
| Vv07g0877 | .                  | .                  | .                  | . | . | .      | . |
| .         | .                  | .                  | .                  | . | . | .      | . |
| Vv07g0878 | .                  | .                  | .                  | . | . | .      | . |
| .         | .                  | .                  | .                  | . | . | .      | . |
| Vv07g0879 | Tc01_g023510       | .                  | .                  | . | . | .      | . |
| .         | .                  | .                  | .                  | . | . | .      | . |
| Vv07g0880 | .                  | Gorai.007G151600.1 | .                  | . | . | .      | . |
| .         | .                  | .                  | .                  | . | . | .      | . |
| Vv07g0881 | .                  | .                  | Gorai.001G235400.1 | . | . | .      | . |
| .         | Gorai.004G223500.1 | .                  | .                  | . | . | .      | . |
| .         | .                  | .                  | .                  | . | . | .      | . |
| Vv07g0882 | .                  | .                  | Gorai.001G235100.1 | . | . | .      | . |
| .         | Gorai.004G223600.1 | .                  | .                  | . | . | .      | . |
| .         | .                  | .                  | .                  | . | . | .      | . |
| Vv07g0883 | .                  | .                  | .                  | . | . | .      | . |
| .         | .                  | .                  | .                  | . | . | .      | . |
| Vv07g0884 | .                  | .                  | .                  | . | . | .      | . |
| .         | .                  | .                  | .                  | . | . | .      | . |
| Vv07g0885 | .                  | .                  | .                  | . | . | .      | . |
| .         | .                  | .                  | .                  | . | . | .      | . |
| Vv07g0886 | .                  | .                  | .                  | . | . | .      | . |
| .         | .                  | .                  | .                  | . | . | .      | . |
| Vv07g0887 | .                  | .                  | .                  | . | . | .      | . |
| .         | .                  | .                  | .                  | . | . | .      | . |
| Vv07g0888 | .                  | .                  | .                  | . | . | .      | . |
| .         | .                  | .                  | .                  | . | . | .      | . |
| Vv07g0889 | Tc01_g007370       | .                  | .                  | . | . | Gorai. | . |

|                    |                    |                    |                    |        |        |   |
|--------------------|--------------------|--------------------|--------------------|--------|--------|---|
| 003G035600.1       | .                  | Vv18g0650          | .                  | .      | .      | . |
| .                  | .                  | .                  | .                  | .      | .      | . |
| .                  | .                  | .                  | .                  | .      | .      | . |
| Vv07g0890          | Tc01_g007360       | .                  | .                  | .      | Gorai. | . |
| 003G035500.1       | .                  | .                  | .                  | .      | .      | . |
| .                  | .                  | .                  | .                  | .      | .      | . |
| Vv07g0891          | Tc01_g007350       | .                  | .                  | .      | Gorai. | . |
| 003G035300.1       | .                  | .                  | .                  | .      | .      | . |
| .                  | .                  | .                  | .                  | .      | .      | . |
| Vv07g0892          | .                  | .                  | .                  | .      | .      | . |
| .                  | .                  | .                  | .                  | .      | .      | . |
| .                  | .                  | .                  | .                  | .      | .      | . |
| Vv07g0893          | Tc01_g007340       | .                  | Gorai.008G087900.1 | .      | .      | . |
| Gorai.007G229400.1 | Gorai.003G035200.1 | .                  | .                  | .      | .      | . |
| .                  | .                  | .                  | .                  | .      | .      | . |
| .                  | .                  | .                  | .                  | .      | .      | . |
| Vv07g0894          | .                  | .                  | .                  | .      | .      | . |
| .                  | .                  | .                  | .                  | .      | .      | . |
| .                  | .                  | .                  | .                  | .      | .      | . |
| Vv07g0895          | Tc01_g007300       | .                  | .                  | .      | Gorai. | . |
| 003G034900.1       | .                  | .                  | .                  | .      | .      | . |
| .                  | .                  | .                  | .                  | .      | .      | . |
| Vv07g0896          | Tc01_g007290       | .                  | Gorai.008G087800.1 | .      | .      | . |
| Gorai.007G229300.1 | Gorai.003G034800.1 | .                  | .                  | .      | .      | . |
| .                  | .                  | .                  | .                  | .      | .      | . |
| .                  | .                  | .                  | .                  | .      | .      | . |
| Vv07g0897          | .                  | .                  | .                  | .      | .      | . |
| .                  | .                  | .                  | .                  | .      | .      | . |
| .                  | .                  | .                  | .                  | .      | .      | . |
| Vv07g0898          | .                  | .                  | .                  | .      | .      | . |
| .                  | .                  | .                  | .                  | .      | .      | . |
| .                  | .                  | .                  | .                  | .      | .      | . |
| Vv07g0899          | Tc01_g036000       | .                  | .                  | .      | .      | . |
| .                  | .                  | .                  | .                  | .      | .      | . |
| .                  | .                  | .                  | .                  | .      | .      | . |
| Vv07g0900          | .                  | Gorai.008G087600.1 | .                  | Gorai. | .      | . |
| 007G229000.1       | Gorai.003G034700.1 | .                  | .                  | .      | .      | . |
| .                  | .                  | .                  | .                  | .      | .      | . |
| .                  | .                  | .                  | .                  | .      | .      | . |
| Vv07g0901          | Tc01_g007250       | .                  | .                  | .      | .      | . |
| .                  | .                  | .                  | .                  | .      | .      | . |
| .                  | .                  | .                  | .                  | .      | .      | . |
| Vv07g0902          | .                  | .                  | Gorai.007G228900.1 | .      | .      | . |
| Gorai.003G034600.1 | .                  | .                  | .                  | .      | .      | . |
| .                  | .                  | .                  | .                  | .      | .      | . |
| .                  | .                  | .                  | .                  | .      | .      | . |
| Vv07g0903          | .                  | .                  | .                  | .      | .      | . |
| .                  | .                  | .                  | .                  | .      | .      | . |
| .                  | .                  | .                  | .                  | .      | .      | . |
| Vv07g0904          | Tc01_g007240       | .                  | .                  | .      | Gorai. | . |

|                    |                    |                    |                    |   |        |   |   |
|--------------------|--------------------|--------------------|--------------------|---|--------|---|---|
| 003G034600.1       | .                  | .                  | .                  | . | .      | . | . |
| .                  | .                  | .                  | .                  | . | .      | . | . |
| Vv07g0905          | .                  | Gorai.007G057800.1 | .                  | . | .      | . | . |
| Gorai.003G034700.1 | .                  | .                  | .                  | . | .      | . | . |
| .                  | .                  | .                  | .                  | . | .      | . | . |
| Vv07g0906          | Tc01_g007230       | Gorai.007G057600.1 | .                  | . | .      | . | . |
| .                  | .                  | .                  | .                  | . | .      | . | . |
| Vv07g0907          | Tc01_g007220       | .                  | .                  | . | Gorai. | . | . |
| 003G034500.1       | .                  | .                  | .                  | . | .      | . | . |
| .                  | .                  | .                  | .                  | . | .      | . | . |
| Vv07g0908          | Tc01_g035730       | .                  | Gorai.008G120700.1 | . | .      | . | . |
| .                  | .                  | .                  | .                  | . | .      | . | . |
| Vv07g0909          | Tc01_g007210       | .                  | Gorai.001G234000.1 | . | .      | . | . |
| Gorai.003G034300.1 | .                  | .                  | .                  | . | .      | . | . |
| .                  | .                  | .                  | .                  | . | .      | . | . |
| Vv07g0910          | Tc01_g007200       | .                  | Gorai.008G087500.1 | . | .      | . | . |
| Gorai.007G228700.1 | Gorai.003G034200.1 | .                  | .                  | . | .      | . | . |
| .                  | .                  | .                  | .                  | . | .      | . | . |
| Vv07g0911          | .                  | .                  | .                  | . | .      | . | . |
| .                  | .                  | .                  | .                  | . | .      | . | . |
| Vv07g0912          | Tc01_g007180       | .                  | Gorai.008G087400.1 | . | .      | . | . |
| .                  | Vv03g0870          | .                  | .                  | . | .      | . | . |
| .                  | Vv18g0665          | .                  | Gorai.             | . | .      | . | . |
| 005G097800.1       | Gorai.009G224800.1 | .                  | .                  | . | .      | . | . |
| Vv07g0913          | Tc01_g007160       | .                  | Gorai.007G228500.1 | . | .      | . | . |
| Gorai.003G034100.1 | .                  | Vv03g0882          | .                  | . | .      | . | . |
| Tc02_g010670       | .                  | Gorai.008G017200.1 | .                  | . | .      | . | . |
| .                  | .                  | .                  | .                  | . | .      | . | . |
| Vv07g0914          | Tc01_g007150       | .                  | Gorai.007G228300.1 | . | .      | . | . |
| Gorai.003G034000.1 | .                  | .                  | .                  | . | .      | . | . |
| .                  | .                  | .                  | .                  | . | .      | . | . |
| Vv07g0915          | Tc01_g007140       | .                  | Gorai.008G087300.1 | . | .      | . | . |
| Gorai.003G033900.1 | .                  | Vv03g0894          | .                  | . | .      | . | . |
| Tc02_g002350       | Gorai.005G262800.1 | .                  | Gorai.             | . | .      | . | . |
| 008G016500.1       | .                  | .                  | .                  | . | .      | . | . |
| .                  | .                  | .                  | .                  | . | .      | . | . |
| Vv07g0916          | Tc01_g007130       | .                  | Gorai.008G087200.1 | . | .      | . | . |
| .                  | .                  | .                  | .                  | . | .      | . | . |
| .                  | .                  | .                  | .                  | . | .      | . | . |
| Vv07g0917          | Tc01_g007120       | Gorai.007G057500.1 | Gorai.             | . | .      | . | . |
| 008G087000.1       | Gorai.007G228200.1 | Gorai.003G033800.1 | .                  | . | .      | . | . |
| .                  | .                  | .                  | .                  | . | .      | . | . |
| Vv18g0677          | .                  | .                  | .                  | . | .      | . | . |

|                    |                    |           |                    |                    |        |
|--------------------|--------------------|-----------|--------------------|--------------------|--------|
| Vv07g0918          | Tc01_g007070       | .         | .                  | .                  | Gorai. |
| 003G033300.1       | .                  | .         | .                  | .                  | .      |
| .                  | .                  | .         | .                  | .                  | .      |
| Vv07g0919          | .                  | .         | .                  | .                  | .      |
| Vv03g0901          | Gorai.013G054100.1 | .         | .                  | .                  | .      |
| .                  | .                  | .         | .                  | .                  | .      |
| Vv07g0920          | Tc01_g007060       | .         | .                  | Gorai.007G227800.1 | .      |
| Gorai.003G033100.1 | .                  | .         | .                  | .                  | .      |
| .                  | .                  | .         | .                  | .                  | .      |
| .                  | .                  | .         | .                  | .                  | .      |
| Vv07g0921          | .                  | .         | .                  | .                  | .      |
| .                  | .                  | .         | .                  | .                  | .      |
| .                  | .                  | .         | .                  | .                  | .      |
| Vv07g0922          | .                  | .         | .                  | .                  | .      |
| .                  | .                  | .         | .                  | .                  | .      |
| .                  | .                  | .         | .                  | .                  | .      |
| Vv07g0923          | .                  | .         | .                  | .                  | .      |
| .                  | .                  | .         | .                  | .                  | .      |
| .                  | .                  | .         | .                  | .                  | .      |
| Vv07g0924          | Tc01_g007050       | .         | Gorai.008G086600.1 | .                  | .      |
| Gorai.007G227600.1 | .                  | .         | .                  | .                  | .      |
| .                  | Vv18g0683          | .         | .                  | .                  | .      |
| .                  | Gorai.009G277800.1 | .         | .                  | .                  | .      |
| Vv07g0925          | .                  | .         | .                  | .                  | .      |
| .                  | .                  | .         | .                  | .                  | .      |
| .                  | .                  | .         | .                  | .                  | .      |
| Vv07g0926          | Tc01_g007010       | .         | Gorai.007G227300.1 | .                  | .      |
| Gorai.003G032800.1 | .                  | Vv03g0924 | .                  | .                  | .      |
| Tc02_g002470       | Gorai.002G212400.1 | .         | .                  | .                  | .      |
| Vv18g0693          | .                  | .         | Gorai.009G222600.1 | .                  | .      |
| .                  | .                  | .         | .                  | .                  | .      |
| Vv07g0927          | Tc01_g007000       | .         | Gorai.007G227000.1 | .                  | .      |
| .                  | .                  | .         | .                  | .                  | .      |
| .                  | .                  | .         | .                  | .                  | .      |
| Vv07g0928          | .                  | .         | .                  | .                  | .      |
| .                  | .                  | .         | .                  | .                  | .      |
| .                  | .                  | .         | .                  | .                  | .      |
| Vv07g0929          | .                  | .         | .                  | .                  | .      |
| .                  | .                  | .         | .                  | .                  | .      |
| .                  | .                  | .         | .                  | .                  | .      |
| Vv07g0930          | Tc01_g006990       | .         | .                  | Gorai.             | .      |
| 003G032700.1       | .                  | Vv03g0926 | Tc02_g002480       | Gorai.             | .      |
| 002G212300.1       | Gorai.005G262700.1 | .         | Gorai.008G043300.1 | .                  | .      |
| .                  | .                  | .         | .                  | .                  | .      |
| Vv07g0931          | Tc01_g006980       | .         | .                  | Gorai.             | .      |
| 003G032600.1       | .                  | .         | .                  | .                  | .      |
| .                  | .                  | .         | .                  | .                  | .      |
| Vv07g0932          | Tc01_g006970       | .         | Gorai.008G086200.1 | .                  | .      |
| .                  | .                  | .         | .                  | .                  | .      |
| .                  | .                  | .         | .                  | .                  | .      |

|                    |                    |                    |                    |                    |
|--------------------|--------------------|--------------------|--------------------|--------------------|
| Vv07g0933          | Tc01_g006960       | .                  | .                  | Gorai.007G226900.1 |
|                    | Gorai.003G032500.1 | .                  | Vv03g0938          | .                  |
| Tc02_g002530       | .                  | Gorai.005G262400.1 | .                  | .                  |
| Gorai.012G162200.1 | Vv18g0695          | .                  | .                  | .                  |
| Gorai.009G222400.1 | .                  | Gorai.010G028500.1 | .                  | .                  |
| Vv07g0934          | Tc01_g006940       | .                  | .                  | Gorai.007G226800.1 |
| .                  | .                  | .                  | .                  | .                  |
| .                  | .                  | .                  | .                  | .                  |
| Vv07g0935          | Tc01_g006930       | .                  | Gorai.008G086100.1 | .                  |
| Gorai.007G226700.1 | Gorai.003G032400.1 | .                  | .                  | .                  |
| .                  | .                  | .                  | .                  | .                  |
| .                  | .                  | .                  | .                  | .                  |
| Vv07g0936          | .                  | .                  | .                  | .                  |
| .                  | .                  | .                  | .                  | .                  |
| .                  | .                  | .                  | .                  | .                  |
| Vv07g0937          | Tc01_g006920       | .                  | Gorai.008G086000.1 | .                  |
| Gorai.007G226500.1 | Gorai.003G037100.1 | .                  | Gorai.011G109500.1 | .                  |
| .                  | .                  | .                  | .                  | .                  |
| .                  | .                  | .                  | .                  | .                  |
| Vv07g0938          | .                  | .                  | .                  | .                  |
| .                  | .                  | .                  | .                  | .                  |
| .                  | .                  | .                  | .                  | .                  |
| Vv07g0939          | Tc01_g006800       | .                  | .                  | Gorai.007G225900.1 |
| .                  | Vv18g0713          | .                  | .                  | .                  |
| .                  | Gorai.010G026600.1 | .                  | .                  | .                  |
| .                  | .                  | .                  | .                  | .                  |
| Vv07g0940          | Tc01_g006790       | .                  | .                  | Gorai.007G225800.1 |
|                    | Gorai.003G031800.1 | .                  | .                  | .                  |
| .                  | .                  | .                  | .                  | .                  |
| .                  | .                  | .                  | .                  | .                  |
| Vv07g0941          | Tc01_g006780       | .                  | .                  | Gorai.007G225700.1 |
|                    | Gorai.003G031700.1 | .                  | Vv18g0714          | .                  |
| .                  | Gorai.009G221400.1 | .                  | Gorai.010G026500.1 | .                  |
| .                  | .                  | .                  | .                  | .                  |
| Vv07g0942          | .                  | .                  | .                  | .                  |
| .                  | .                  | .                  | .                  | .                  |
| .                  | .                  | .                  | .                  | .                  |
| Vv07g0943          | Tc01_g006770       | .                  | .                  | Gorai.007G225600.1 |
| .                  | .                  | .                  | .                  | .                  |
| .                  | .                  | .                  | .                  | .                  |
| Vv07g0944          | Tc01_g006750       | .                  | Gorai.008G084500.1 | .                  |
| Gorai.007G187800.1 | .                  | Vv18g0715          | .                  | .                  |
| .                  | Gorai.009G277400.1 | .                  | Gorai.010G026400.1 | .                  |
| .                  | .                  | .                  | .                  | .                  |
| Vv07g0945          | Tc01_g006710       | .                  | .                  | Gorai.007G224900.1 |
| .                  | .                  | .                  | .                  | .                  |
| .                  | .                  | .                  | .                  | .                  |
| Vv07g0946          | .                  | .                  | .                  | .                  |
| Vv03g0815          | Gorai.013G050900.1 | .                  | Gorai.005G230300.1 | .                  |
| .                  | .                  | .                  | .                  | .                  |



|                    |                    |   |   |                    |   |   |   |
|--------------------|--------------------|---|---|--------------------|---|---|---|
| Vv07g0947          | .                  | . | . | .                  | . | . | . |
| .                  | .                  | . | . | .                  | . | . | . |
| Vv07g0948          | Tc01_g006700       | . | . | Gorai.008G084100.1 | . | . | . |
| Gorai.007G224800.1 | Gorai.003G031400.1 | . | . | .                  | . | . | . |
| .                  | .                  | . | . | .                  | . | . | . |
| Vv07g0949          | Tc01_g006690       | . | . | Gorai.007G056700.1 | . | . | . |
| Gorai.007G224700.1 | Gorai.003G031300.1 | . | . | .                  | . | . | . |
| .                  | .                  | . | . | Vv18g0725          | . | . | . |
| Vv07g0950          | .                  | . | . | .                  | . | . | . |
| .                  | .                  | . | . | .                  | . | . | . |
| Vv07g0951          | Tc01_g006680       | . | . | Gorai.007G224600.1 | . | . | . |
| Gorai.003G031200.1 | .                  | . | . | .                  | . | . | . |
| .                  | .                  | . | . | Vv18g0744          | . | . | . |
| Gorai.009G219400.1 | .                  | . | . | .                  | . | . | . |
| Vv07g0952          | Tc01_g006670       | . | . | Gorai.007G224500.1 | . | . | . |
| Gorai.003G031100.1 | .                  | . | . | .                  | . | . | . |
| .                  | .                  | . | . | .                  | . | . | . |
| Vv07g0953          | Tc01_g006650       | . | . | Gorai.008G083300.1 | . | . | . |
| .                  | .                  | . | . | .                  | . | . | . |
| Vv07g0954          | .                  | . | . | .                  | . | . | . |
| .                  | .                  | . | . | .                  | . | . | . |
| Vv07g0955          | .                  | . | . | .                  | . | . | . |
| .                  | .                  | . | . | .                  | . | . | . |
| Vv07g0956          | Tc01_g006630       | . | . | .                  | . | . | . |
| .                  | .                  | . | . | .                  | . | . | . |
| Vv07g0957          | .                  | . | . | Gorai.007G224300.1 | . | . | . |
| Gorai.003G030900.1 | Gorai.011G108300.1 | . | . | .                  | . | . | . |
| .                  | .                  | . | . | .                  | . | . | . |
| Vv07g0958          | Tc01_g006620       | . | . | Gorai.007G056600.1 | . | . | . |
| .                  | .                  | . | . | .                  | . | . | . |
| Vv07g0959          | Tc01_g006600       | . | . | .                  | . | . | . |
| Gorai.011G108200.1 | .                  | . | . | .                  | . | . | . |
| .                  | .                  | . | . | .                  | . | . | . |
| Vv07g0960          | .                  | . | . | .                  | . | . | . |
| .                  | .                  | . | . | .                  | . | . | . |
| Vv07g0961          | .                  | . | . | .                  | . | . | . |
| .                  | .                  | . | . | .                  | . | . | . |

|                    |                    |   |   |                    |
|--------------------|--------------------|---|---|--------------------|
| Vv07g0962          | Tc01_g006510       | . | . | Gorai.007G223200.1 |
|                    | Gorai.003G030100.1 | . | . | .                  |
| .                  | .                  | . | . | .                  |
| Vv07g0963          | Tc01_g006500       | . | . | Gorai.008G083000.1 |
| .                  | .                  | . | . | .                  |
| .                  | .                  | . | . | .                  |
| Vv07g0964          | Tc01_g006490       | . | . | Gorai.007G056500.1 |
| Gorai.007G223100.1 | Gorai.003G030000.1 | . | . | Gorai.011G108100.1 |
| .                  | .                  | . | . | .                  |
| .                  | .                  | . | . | .                  |
| Vv07g0965          | Tc01_g006480       | . | . | Gorai.008G082900.1 |
| Gorai.007G223000.1 | .                  | . | . | Vv03g0795          |
| .                  | .                  | . | . | .                  |
| .                  | .                  | . | . | .                  |
| Vv07g0966          | Tc01_g006470       | . | . | Gorai.             |
| 003G029900.1       | Gorai.011G108000.1 | . | . | .                  |
| .                  | .                  | . | . | .                  |
| .                  | .                  | . | . | .                  |
| Vv07g0967          | Tc01_g006460       | . | . | Gorai.007G222900.1 |
| .                  | .                  | . | . | .                  |
| .                  | .                  | . | . | .                  |
| Vv07g0968          | Tc01_g006440       | . | . | Gorai.007G056400.1 |
| Gorai.007G222700.1 | Gorai.003G029700.1 | . | . | .                  |
| .                  | .                  | . | . | .                  |
| .                  | .                  | . | . | .                  |
| Vv07g0969          | Tc01_g006430       | . | . | Gorai.008G082700.1 |
| Gorai.007G222600.1 | .                  | . | . | Gorai.011G105000.1 |
| .                  | .                  | . | . | .                  |
| .                  | .                  | . | . | .                  |
| Vv07g0970          | Tc01_g006420       | . | . | Gorai.008G082600.1 |
| .                  | .                  | . | . | .                  |
| .                  | .                  | . | . | .                  |
| Vv07g0971          | .                  | . | . | .                  |
| .                  | .                  | . | . | .                  |
| .                  | .                  | . | . | .                  |
| Vv07g0972          | .                  | . | . | .                  |
| .                  | .                  | . | . | .                  |
| .                  | .                  | . | . | .                  |
| Vv07g0973          | Tc01_g006380       | . | . | Gorai.007G222400.1 |
|                    | Gorai.003G039100.1 | . | . | Vv03g0779          |
| Tc02_g010110       | Gorai.013G050000.1 | . | . | Gorai.005G232400.1 |
| .                  | .                  | . | . | .                  |
| .                  | .                  | . | . | .                  |
| Vv07g0974          | Tc01_g006370       | . | . | Gorai.008G082400.1 |
| Gorai.007G222300.1 | Gorai.003G029400.1 | . | . | .                  |
| .                  | .                  | . | . | .                  |
| .                  | .                  | . | . | .                  |
| Vv07g0975          | Tc01_g006360       | . | . | Gorai.007G222200.1 |

|                    |                    |                    |                    |                    |   |   |
|--------------------|--------------------|--------------------|--------------------|--------------------|---|---|
|                    | Gorai.003G029300.1 | .                  | .                  | .                  | . | . |
|                    | .                  | .                  | .                  | .                  | . | . |
| Vv07g0976          | Tc01_g006340       | .                  | .                  | .                  | . | . |
|                    | .                  | .                  | .                  | .                  | . | . |
| Vv07g0977          | Tc01_g006330       | .                  | .                  | .                  | . | . |
|                    | .                  | .                  | .                  | .                  | . | . |
| Vv07g0978          | Tc01_g006320       | .                  | .                  | Gorai.007G222100.1 | . | . |
|                    | .                  | .                  | .                  | .                  | . | . |
| Vv07g0979          | .                  | .                  | .                  | .                  | . | . |
|                    | .                  | .                  | .                  | .                  | . | . |
| Vv07g0980          | Tc01_g006310       | .                  | .                  | .                  | . | . |
|                    | .                  | .                  | .                  | .                  | . | . |
| Vv07g0981          | .                  | .                  | .                  | .                  | . | . |
|                    | .                  | .                  | .                  | .                  | . | . |
| Vv07g0982          | Tc01_g006300       | Gorai.007G056300.1 | .                  | Gorai.             | . | . |
| 008G081100.1       | Gorai.007G222000.1 | .                  | .                  | Vv03g0778          | . | . |
|                    | Tc02_g010100       | Gorai.005G232500.1 | .                  | .                  | . | . |
|                    | Vv18g0751          | .                  | .                  | Gorai.             | . | . |
| 009G218800.1       | .                  | Gorai.010G025100.1 | .                  | .                  | . | . |
| Vv07g0983          | Tc01_g006290       | Gorai.007G056200.1 | .                  | .                  | . | . |
| Gorai.007G221900.1 | .                  | .                  | .                  | .                  | . | . |
|                    | .                  | .                  | .                  | .                  | . | . |
| Vv07g0984          | .                  | .                  | .                  | .                  | . | . |
|                    | .                  | .                  | .                  | .                  | . | . |
| Vv07g0985          | .                  | Gorai.008G080900.1 | .                  | Gorai.             | . | . |
| 007G221800.1       | Gorai.003G029100.1 | .                  | .                  | Vv03g0772          | . | . |
| Tc02_g010010       | .                  | Gorai.002G010000.1 | .                  | .                  | . | . |
|                    | .                  | .                  | .                  | .                  | . | . |
| Vv07g0986          | Tc01_g006280       | .                  | Gorai.008G080800.1 | .                  | . | . |
|                    | Gorai.003G029000.1 | .                  | .                  | .                  | . | . |
|                    | .                  | .                  | .                  | .                  | . | . |
| Vv07g0987          | Tc01_g006270       | .                  | .                  | Gorai.007G221700.1 | . | . |
|                    | Gorai.003G028900.1 | .                  | .                  | .                  | . | . |
|                    | .                  | .                  | .                  | .                  | . | . |
| Vv07g0988          | Tc01_g006260       | .                  | Gorai.008G080700.1 | .                  | . | . |
| Gorai.007G221600.1 | .                  | .                  | .                  | .                  | . | . |
|                    | .                  | .                  | .                  | .                  | . | . |
| Vv07g0989          | Tc01_g006250       | .                  | Gorai.008G080600.1 | .                  | . | . |

|                    |                    |                    |                    |        |   |   |   |
|--------------------|--------------------|--------------------|--------------------|--------|---|---|---|
| .                  | .                  | .                  | .                  | .      | . | . | . |
| .                  | .                  | .                  | .                  | .      | . | . | . |
| Vv07g0990          | Tc01_g006240       | Gorai.007G056100.1 | Gorai.             | .      | . | . | . |
| 008G080500.1       | .                  | .                  | .                  | .      | . | . | . |
| .                  | .                  | .                  | .                  | .      | . | . | . |
| .                  | .                  | .                  | .                  | .      | . | . | . |
| Vv07g0991          | Tc01_g006230       | .                  | Gorai.008G080400.1 | .      | . | . | . |
| Gorai.003G028800.1 | .                  | .                  | .                  | .      | . | . | . |
| .                  | .                  | .                  | .                  | .      | . | . | . |
| Gorai.009G218200.1 | .                  | Vv18g0759          | .                  | .      | . | . | . |
| 010G024800.1       | .                  | Gorai.009G274000.1 | Gorai.             | .      | . | . | . |
| Vv07g0992          | Tc01_g006220       | .                  | Gorai.008G080300.1 | .      | . | . | . |
| Gorai.007G221500.1 | .                  | .                  | .                  | .      | . | . | . |
| .                  | .                  | .                  | .                  | .      | . | . | . |
| .                  | .                  | Vv18g0760          | .                  | .      | . | . | . |
| .                  | .                  | Gorai.010G024700.1 | .                  | .      | . | . | . |
| Vv07g0993          | Tc01_g006210       | .                  | Gorai.008G080200.1 | .      | . | . | . |
| Gorai.007G221400.1 | .                  | .                  | .                  | .      | . | . | . |
| .                  | .                  | .                  | .                  | .      | . | . | . |
| .                  | .                  | .                  | .                  | .      | . | . | . |
| Vv07g0994          | Tc01_g006200       | .                  | Gorai.007G190600.1 | .      | . | . | . |
| .                  | Vv03g0763          | .                  | .                  | .      | . | . | . |
| Gorai.002G009900.1 | .                  | .                  | .                  | .      | . | . | . |
| .                  | .                  | .                  | .                  | .      | . | . | . |
| Vv07g0995          | Tc01_g006180       | .                  | Gorai.008G080100.1 | .      | . | . | . |
| .                  | .                  | .                  | .                  | .      | . | . | . |
| .                  | .                  | .                  | .                  | .      | . | . | . |
| Vv07g0996          | Tc01_g006170       | .                  | .                  | .      | . | . | . |
| .                  | .                  | .                  | .                  | .      | . | . | . |
| .                  | .                  | .                  | .                  | .      | . | . | . |
| Vv07g0997          | Tc01_g006160       | .                  | .                  | .      | . | . | . |
| .                  | .                  | .                  | .                  | .      | . | . | . |
| .                  | .                  | .                  | .                  | .      | . | . | . |
| Vv07g0998          | .                  | .                  | Gorai.003G028700.1 | .      | . | . | . |
| .                  | .                  | .                  | .                  | .      | . | . | . |
| .                  | .                  | .                  | .                  | .      | . | . | . |
| Vv07g0999          | Tc01_g006150       | .                  | Gorai.008G080000.1 | .      | . | . | . |
| Gorai.007G220900.1 | Gorai.003G028600.1 | .                  | .                  | .      | . | . | . |
| .                  | .                  | .                  | .                  | .      | . | . | . |
| .                  | .                  | .                  | .                  | .      | . | . | . |
| Vv07g1000          | Tc01_g006140       | .                  | Gorai.007G190900.1 | .      | . | . | . |
| .                  | Vv03g0759          | .                  | Tc02_g009910       | Gorai. | . | . | . |
| 013G049000.1       | Gorai.005G233000.1 | .                  | .                  | .      | . | . | . |
| Vv18g0765          | .                  | .                  | .                  | .      | . | . | . |
| Vv07g1001          | Tc01_g006130       | .                  | .                  | Gorai. | . | . | . |
| 003G028500.1       | .                  | .                  | .                  | .      | . | . | . |
| .                  | .                  | .                  | .                  | .      | . | . | . |
| Vv07g1002          | Tc01_g006110       | .                  | Gorai.007G220700.1 | .      | . | . | . |
| .                  | .                  | .                  | .                  | .      | . | . | . |
| .                  | .                  | .                  | .                  | .      | . | . | . |
| Vv07g1003          | Tc01_g006100       | .                  | Gorai.007G220600.1 | .      | . | . | . |

|                    |                    |                    |  |  |                    |  |
|--------------------|--------------------|--------------------|--|--|--------------------|--|
|                    |                    | Vv18g0770          |  |  |                    |  |
|                    |                    | Gorai.010G024500.1 |  |  |                    |  |
| Vv07g1004          |                    |                    |  |  |                    |  |
| Vv07g1005          |                    |                    |  |  |                    |  |
| Vv07g1006          | Tc01_g006080       |                    |  |  | Gorai.             |  |
| 003G028400.1       |                    |                    |  |  |                    |  |
| Vv07g1007          | Tc01_g006070       |                    |  |  | Gorai.007G220200.1 |  |
| Gorai.003G028300.1 |                    |                    |  |  |                    |  |
| Vv07g1008          | Tc01_g006040       |                    |  |  | Gorai.008G079700.1 |  |
| Gorai.007G219900.1 | Gorai.003G028100.1 |                    |  |  |                    |  |
| Vv07g1009          | Tc01_g006030       | Gorai.007G056000.1 |  |  |                    |  |
| Gorai.007G191200.1 | Gorai.003G027900.1 |                    |  |  | Vv18g0773          |  |
|                    | Gorai.002G132900.1 |                    |  |  | Gorai.009G217300.1 |  |
| Vv07g1010          | Tc01_g006020       |                    |  |  |                    |  |
| Vv07g1011          | Tc01_g006010       |                    |  |  | Gorai.008G079600.1 |  |
| Gorai.007G219700.1 | Gorai.003G027800.1 |                    |  |  | Vv18g0775          |  |
|                    | Gorai.009G217100.1 |                    |  |  |                    |  |
| Vv07g1012          | Tc01_g006000       |                    |  |  | Gorai.             |  |
| 003G027700.1       | Vv18g0779          |                    |  |  | Gorai.             |  |
| 005G100500.1       |                    |                    |  |  |                    |  |
| Vv07g1013          | Tc01_g005980       |                    |  |  | Gorai.007G219600.1 |  |
|                    | Vv18g0781          |                    |  |  |                    |  |
| Vv07g1014          |                    |                    |  |  |                    |  |
| Vv07g1015          | Tc01_g005970       | Gorai.007G055900.1 |  |  | Gorai.             |  |
| 008G076600.1       | Gorai.007G219500.1 |                    |  |  |                    |  |
| Vv07g1016          | Tc01_g005950       |                    |  |  |                    |  |

|                    |              |   |   |   |                    |   |   |
|--------------------|--------------|---|---|---|--------------------|---|---|
| Vv07g1017          | .            | . | . | . | Gorai.003G027600.1 | . | . |
| .                  | .            | . | . | . | .                  | . | . |
| Vv07g1018          | Tc01_g005940 | . | . | . | Gorai.007G055800.1 | . | . |
| Gorai.007G219300.1 | .            | . | . | . | .                  | . | . |
| .                  | .            | . | . | . | .                  | . | . |
| Vv07g1019          | .            | . | . | . | .                  | . | . |
| .                  | .            | . | . | . | .                  | . | . |
| Vv07g1020          | .            | . | . | . | .                  | . | . |
| .                  | .            | . | . | . | .                  | . | . |
| Vv07g1021          | .            | . | . | . | .                  | . | . |
| .                  | .            | . | . | . | .                  | . | . |
| Vv07g1022          | .            | . | . | . | .                  | . | . |
| .                  | .            | . | . | . | .                  | . | . |
| Vv07g1023          | .            | . | . | . | .                  | . | . |
| .                  | .            | . | . | . | .                  | . | . |
| Vv07g1024          | Tc01_g005930 | . | . | . | .                  | . | . |
| .                  | .            | . | . | . | .                  | . | . |
| Vv07g1025          | .            | . | . | . | .                  | . | . |
| .                  | .            | . | . | . | .                  | . | . |
| Vv07g1026          | .            | . | . | . | .                  | . | . |
| .                  | .            | . | . | . | .                  | . | . |
| Vv07g1027          | Tc01_g005910 | . | . | . | .                  | . | . |
| .                  | .            | . | . | . | .                  | . | . |
| Vv07g1028          | .            | . | . | . | .                  | . | . |
| .                  | .            | . | . | . | .                  | . | . |
| Vv07g1029          | .            | . | . | . | .                  | . | . |
| .                  | .            | . | . | . | .                  | . | . |
| Vv07g1030          | Tc01_g005890 | . | . | . | Gorai.007G219200.1 | . | . |
| .                  | .            | . | . | . | .                  | . | . |
| Vv07g1031          | .            | . | . | . | .                  | . | . |
| .                  | .            | . | . | . | .                  | . | . |
| Vv07g1032          | Tc01_g005880 | . | . | . | .                  | . | . |
| .                  | .            | . | . | . | .                  | . | . |
| Vv07g1033          | .            | . | . | . | .                  | . | . |

|           |              |   |   |   |                    |   |   |
|-----------|--------------|---|---|---|--------------------|---|---|
| .         | .            | . | . | . | .                  | . | . |
| .         | .            | . | . | . | .                  | . | . |
| Vv07g1034 | .            | . | . | . | .                  | . | . |
| .         | .            | . | . | . | .                  | . | . |
| Vv07g1035 | .            | . | . | . | .                  | . | . |
| .         | .            | . | . | . | .                  | . | . |
| Vv07g1036 | Tc01_g005870 | . | . | . | Gorai.007G219100.1 | . | . |
| .         | .            | . | . | . | .                  | . | . |
| Vv07g1037 | .            | . | . | . | .                  | . | . |
| .         | .            | . | . | . | .                  | . | . |
| Vv07g1038 | .            | . | . | . | .                  | . | . |
| Vv18g0250 | .            | . | . | . | .                  | . | . |
| .         | .            | . | . | . | .                  | . | . |
| Vv07g1039 | .            | . | . | . | .                  | . | . |
| .         | .            | . | . | . | .                  | . | . |
| Vv07g1040 | .            | . | . | . | .                  | . | . |
| .         | .            | . | . | . | .                  | . | . |
| Vv07g1041 | .            | . | . | . | .                  | . | . |
| .         | .            | . | . | . | .                  | . | . |
| Vv07g1042 | Tc01_g005840 | . | . | . | Gorai.007G219000.1 | . | . |
| .         | .            | . | . | . | .                  | . | . |
| Vv07g1043 | .            | . | . | . | .                  | . | . |
| .         | .            | . | . | . | .                  | . | . |
| Vv07g1044 | .            | . | . | . | .                  | . | . |
| .         | .            | . | . | . | .                  | . | . |
| Vv07g1045 | .            | . | . | . | .                  | . | . |
| .         | .            | . | . | . | .                  | . | . |
| Vv07g1046 | .            | . | . | . | .                  | . | . |
| .         | .            | . | . | . | .                  | . | . |
| Vv07g1047 | Tc01_g005830 | . | . | . | Gorai.007G218700.1 | . | . |
| .         | .            | . | . | . | .                  | . | . |
| Vv07g1048 | .            | . | . | . | .                  | . | . |
| .         | .            | . | . | . | .                  | . | . |
| Vv07g1049 | Tc01_g005820 | . | . | . | .                  | . | . |
| .         | .            | . | . | . | .                  | . | . |
| .         | .            | . | . | . | .                  | . | . |

|                    |                    |                    |   |                    |
|--------------------|--------------------|--------------------|---|--------------------|
| Vv07g1050          | Tc01_g005810       | .                  | . | Gorai.007G218600.1 |
| .                  | .                  | .                  | . | .                  |
| Vv07g1051          | .                  | .                  | . | .                  |
| .                  | .                  | .                  | . | .                  |
| Vv07g1052          | Tc01_g005800       | .                  | . | Gorai.007G218500.1 |
| Gorai.003G027400.1 | .                  | .                  | . | .                  |
| .                  | .                  | .                  | . | .                  |
| Vv07g1053          | .                  | .                  | . | .                  |
| .                  | .                  | .                  | . | .                  |
| Vv07g1054          | Tc01_g005750       | .                  | . | .                  |
| Vv18g0797          | .                  | .                  | . | .                  |
| .                  | .                  | .                  | . | .                  |
| Vv07g1055          | .                  | .                  | . | .                  |
| .                  | .                  | .                  | . | .                  |
| Vv07g1056          | Gorai.007G055700.1 | .                  | . | .                  |
| Vv18g0798          | .                  | .                  | . | .                  |
| .                  | .                  | .                  | . | .                  |
| Vv07g1057          | Tc01_g005730       | .                  | . | Gorai.007G218300.1 |
| Vv03g0748          | .                  | Tc02_g009490       | . | .                  |
| .                  | .                  | .                  | . | .                  |
| Vv07g1058          | Tc01_g005720       | .                  | . | Gorai.007G218200.1 |
| .                  | .                  | .                  | . | .                  |
| Vv07g1059          | Tc01_g005710       | Gorai.007G055600.1 | . | .                  |
| Gorai.007G218100.1 | .                  | .                  | . | .                  |
| .                  | .                  | .                  | . | .                  |
| Vv07g1060          | Tc01_g005690       | .                  | . | Gorai.007G218000.1 |
| .                  | .                  | .                  | . | .                  |
| Vv07g1061          | Tc01_g005680       | .                  | . | Gorai.             |
| 003G027300.1       | .                  | .                  | . | .                  |
| Vv07g1062          | Tc01_g005670       | .                  | . | Gorai.             |
| 003G027200.1       | .                  | .                  | . | .                  |
| Vv07g1063          | .                  | .                  | . | .                  |
| .                  | .                  | .                  | . | .                  |
| Vv07g1064          | Tc01_g005660       | .                  | . | Gorai.007G217400.1 |
| .                  | .                  | .                  | . | .                  |
| Vv07g1065          | Tc01_g005650       | .                  | . | Gorai.             |
| 003G027100.1       | Gorai.011G106700.1 | Vv03g0725          | . | .                  |



|                    |                    |                    |   |
|--------------------|--------------------|--------------------|---|
| Tc02_g009300       | Gorai.013G046400.1 | Gorai.005G235600.1 | . |
| .                  | Gorai.012G149300.1 | Vv18g0816          | . |
| Gorai.002G133500.1 | Gorai.005G101100.1 | Gorai.009G215600.1 | . |
| .                  | .                  | .                  | . |
| Vv07g1066          | .                  | Gorai.003G027000.1 | . |
| Gorai.011G106600.1 | .                  | .                  | . |
| .                  | .                  | .                  | . |
| .                  | .                  | .                  | . |
| Vv07g1067          | Tc01_g005640       | .                  | . |
| .                  | .                  | .                  | . |
| .                  | .                  | .                  | . |
| Vv07g1068          | .                  | .                  | . |
| .                  | .                  | .                  | . |
| .                  | .                  | .                  | . |
| Vv07g1069          | Tc01_g005630       | Gorai.007G055500.1 | . |
| .                  | Vv03g0723          | Tc02_g009270       | . |
| Gorai.005G235800.1 | Gorai.002G008700.1 | Gorai.008G023600.1 | . |
| .                  | .                  | .                  | . |
| Vv07g1070          | Tc01_g005620       | Gorai.007G217100.1 | . |
| Gorai.003G026900.1 | .                  | .                  | . |
| .                  | .                  | .                  | . |
| .                  | .                  | .                  | . |
| Vv07g1071          | Tc01_g005610       | Gorai.007G217000.1 | . |
| .                  | .                  | .                  | . |
| .                  | .                  | .                  | . |
| Vv07g1072          | Tc01_g005600       | .                  | . |
| Vv03g0722          | Tc02_g009260       | Gorai.005G235900.1 | . |
| .                  | Vv18g0822          | Tc08_g000020       | . |
| Gorai.002G133800.1 | .                  | Gorai.009G214900.1 | . |
| Gorai.010G022700.1 | .                  | .                  | . |
| Vv07g1073          | .                  | Gorai.007G216900.1 | . |
| .                  | Vv03g0721          | .                  | . |
| .                  | .                  | .                  | . |
| Vv07g1074          | .                  | .                  | . |
| .                  | .                  | .                  | . |
| .                  | .                  | .                  | . |
| Vv07g1075          | Tc01_g005590       | Gorai.007G216800.1 | . |
| Gorai.003G026800.1 | .                  | .                  | . |
| .                  | .                  | .                  | . |
| .                  | .                  | .                  | . |
| Vv07g1076          | Tc01_g005580       | Gorai.007G216700.1 | . |
| Gorai.003G026600.1 | .                  | .                  | . |
| .                  | Vv18g0825          | Tc08_g000030       | . |
| .                  | Gorai.009G214800.1 | Gorai.010G022600.1 | . |
| Vv07g1077          | Tc01_g005570       | Gorai.             | . |
| 003G026500.1       | .                  | .                  | . |
| .                  | .                  | .                  | . |
| .                  | .                  | .                  | . |
| Vv07g1078          | Tc01_g005550       | .                  | . |
| .                  | .                  | .                  | . |
| .                  | .                  | .                  | . |

|                    |                    |                    |                    |
|--------------------|--------------------|--------------------|--------------------|
| Vv07g1079          | Tc01_g005530       | Gorai.007G055100.1 | .                  |
| Gorai.007G216600.1 | .                  | .                  | Vv03g0719          |
| Tc02_g009190       | .                  | Gorai.005G236300.1 | .                  |
| .                  | .                  | .                  | .                  |
| Vv07g1080          | Tc01_g005520       | .                  | Gorai.007G216500.1 |
| Gorai.003G026300.1 | .                  | .                  | .                  |
| .                  | .                  | .                  | .                  |
| .                  | .                  | .                  | .                  |
| Vv07g1081          | Tc01_g005510       | .                  | Gorai.007G216400.1 |
| Gorai.003G026200.1 | .                  | .                  | .                  |
| .                  | .                  | Vv18g0829          | Tc08_g000080       |
| .                  | Gorai.009G214600.1 | .                  | Gorai.010G022400.1 |
| Vv07g1082          | Tc01_g005500       | .                  | Gorai.007G216300.1 |
| .                  | .                  | .                  | .                  |
| .                  | Vv18g0831          | Tc08_g000090       | .                  |
| Gorai.009G214500.1 | .                  | .                  | .                  |
| Vv07g1083          | Tc01_g005490       | .                  | Gorai.007G216200.1 |
| .                  | .                  | .                  | .                  |
| .                  | .                  | .                  | .                  |
| Vv07g1084          | Tc01_g005480       | .                  | Gorai.             |
| 003G026100.1       | .                  | .                  | .                  |
| .                  | .                  | .                  | .                  |
| Vv07g1085          | Tc01_g005470       | .                  | Gorai.             |
| 003G026000.1       | .                  | .                  | .                  |
| .                  | .                  | .                  | .                  |
| Vv07g1086          | Tc01_g005460       | Gorai.007G054700.1 | .                  |
| .                  | .                  | .                  | .                  |
| .                  | .                  | .                  | .                  |
| Vv07g1087          | Tc01_g005440       | .                  | Gorai.007G215900.1 |
| Gorai.003G025900.1 | .                  | Gorai.011G106200.1 | .                  |
| .                  | .                  | .                  | .                  |
| .                  | .                  | .                  | .                  |
| Vv07g1088          | .                  | .                  | .                  |
| Vv03g0713          | Tc02_g009070       | Gorai.013G045900.1 | Gorai.             |
| 005G236600.1       | .                  | .                  | .                  |
| .                  | .                  | .                  | .                  |
| Vv07g1089          | .                  | .                  | .                  |
| .                  | .                  | .                  | .                  |
| .                  | .                  | .                  | .                  |
| Vv07g1090          | .                  | .                  | .                  |
| .                  | .                  | .                  | .                  |
| .                  | .                  | .                  | .                  |
| Vv07g1091          | Tc01_g005430       | .                  | .                  |
| .                  | .                  | .                  | .                  |
| .                  | .                  | .                  | .                  |
| Vv07g1092          | .                  | .                  | .                  |
| .                  | .                  | .                  | .                  |
| .                  | .                  | .                  | .                  |
| Vv07g1093          | Tc01_g005400       | .                  | Gorai.             |
| 003G025700.1       | .                  | .                  | .                  |

|                    |                    |                    |                    |                    |                    |   |
|--------------------|--------------------|--------------------|--------------------|--------------------|--------------------|---|
| Vv07g1094          | .                  | .                  | .                  | .                  | Gorai.007G215800.1 | . |
|                    | Vv03g0712          | Tc02_g009060       | Gorai.013G045800.1 | .                  | .                  | . |
|                    | Gorai.005G236700.1 | .                  | .                  | .                  | .                  | . |
| Vv07g1095          | Tc01_g005390       | .                  | .                  | Gorai.007G215700.1 | .                  | . |
|                    | Vv03g0711          | Tc02_g009050       | Gorai.             | .                  | .                  | . |
| 013G045700.1       | .                  | .                  | .                  | .                  | .                  | . |
| Vv07g1096          | .                  | .                  | .                  | .                  | .                  | . |
| .                  | .                  | .                  | .                  | .                  | .                  | . |
| Vv07g1097          | Tc01_g005380       | .                  | .                  | Gorai.007G215600.1 | .                  | . |
| .                  | Vv18g0837          | Tc08_g000160       | .                  | .                  | .                  | . |
| .                  | Gorai.010G021700.1 | .                  | .                  | .                  | .                  | . |
| Vv07g1098          | Tc01_g005370       | .                  | .                  | Gorai.007G215500.1 | .                  | . |
| .                  | Vv18g0840          | Tc08_g000170       | .                  | .                  | .                  | . |
| .                  | Gorai.010G021400.1 | .                  | .                  | .                  | .                  | . |
| Vv07g1099          | .                  | .                  | Gorai.007G215400.1 | .                  | .                  | . |
| .                  | Vv18g0843          | .                  | .                  | .                  | .                  | . |
| Gorai.010G021300.1 | .                  | .                  | .                  | .                  | .                  | . |
| Vv07g1100          | Tc01_g005340       | .                  | .                  | Gorai.007G215300.1 | .                  | . |
| .                  | .                  | .                  | .                  | .                  | .                  | . |
| Vv07g1101          | Tc01_g005330       | .                  | .                  | .                  | .                  | . |
| .                  | .                  | .                  | .                  | .                  | .                  | . |
| Vv18g0844          | .                  | .                  | .                  | Gorai.             | .                  | . |
| 010G021200.1       | .                  | .                  | .                  | .                  | .                  | . |
| Vv07g1102          | Tc01_g005320       | .                  | .                  | Gorai.007G215200.1 | .                  | . |
| .                  | Gorai.011G106100.1 | .                  | .                  | .                  | .                  | . |
| .                  | .                  | .                  | .                  | .                  | .                  | . |
| Vv07g1103          | Tc01_g005310       | .                  | Gorai.008G077600.1 | .                  | .                  | . |
|                    | Gorai.003G025600.1 | .                  | .                  | .                  | .                  | . |
| .                  | .                  | .                  | .                  | .                  | .                  | . |
| Vv07g1104          | Tc01_g005300       | .                  | Gorai.008G077500.1 | .                  | .                  | . |
|                    | Gorai.003G025500.1 | .                  | .                  | .                  | .                  | . |
| .                  | .                  | .                  | .                  | .                  | .                  | . |
| Vv07g1105          | Tc01_g005290       | .                  | .                  | .                  | .                  | . |
|                    | Vv03g0706          | Tc02_g008990       | Gorai.013G045300.1 | .                  | .                  | . |
| Gorai.005G237100.1 | .                  | Gorai.008G024000.1 | Gorai.             | .                  | .                  | . |
| 012G149800.1       | .                  | .                  | .                  | .                  | .                  | . |
| Vv07g1106          | .                  | .                  | .                  | .                  | .                  | . |
| .                  | .                  | .                  | .                  | .                  | .                  | . |
| .                  | .                  | .                  | .                  | .                  | .                  | . |

|                    |                    |                    |                    |        |
|--------------------|--------------------|--------------------|--------------------|--------|
| Vv07g1107          | .                  | .                  | Gorai.008G077400.1 | Gorai. |
| 007G215000.1       | .                  | .                  | .                  | .      |
| .                  | .                  | .                  | .                  | .      |
| Vv07g1108          | .                  | .                  | .                  | .      |
| .                  | .                  | .                  | .                  | .      |
| Vv07g1109          | .                  | .                  | Gorai.007G214900.1 | .      |
| .                  | .                  | .                  | .                  | .      |
| Vv07g1110          | .                  | .                  | .                  | .      |
| .                  | .                  | .                  | .                  | .      |
| Vv07g1111          | .                  | .                  | .                  | .      |
| .                  | .                  | .                  | .                  | .      |
| Vv07g1112          | .                  | .                  | .                  | .      |
| .                  | .                  | .                  | .                  | .      |
| Vv07g1113          | Tc01_g005280       | .                  | .                  | .      |
| .                  | .                  | .                  | .                  | .      |
| Vv07g1114          | Tc01_g005270       | .                  | Gorai.008G077300.1 | .      |
| Gorai.007G214800.1 | .                  | .                  | .                  | .      |
| .                  | .                  | .                  | .                  | .      |
| Vv07g1115          | Tc01_g005260       | .                  | Gorai.008G077200.1 | .      |
| Gorai.007G214700.1 | .                  | .                  | .                  | .      |
| .                  | .                  | .                  | .                  | .      |
| Vv07g1116          | Tc01_g005250       | .                  | Gorai.007G214600.1 | .      |
| .                  | .                  | .                  | .                  | .      |
| Vv07g1117          | Tc01_g005240       | .                  | Gorai.007G214500.1 | .      |
| .                  | .                  | .                  | .                  | .      |
| Vv07g1118          | Tc01_g005230       | .                  | Gorai.007G214400.1 | .      |
| .                  | Vv03g0701          | Tc02_g008940       | Gorai.             | .      |
| 013G044900.1       | .                  | Gorai.008G024200.1 | .                  | .      |
| .                  | .                  | .                  | .                  | .      |
| Vv07g1119          | Tc01_g005220       | .                  | Gorai.007G214100.1 | .      |
| .                  | .                  | .                  | .                  | .      |
| .                  | .                  | .                  | .                  | .      |
| Vv07g1120          | Tc01_g005200       | .                  | Gorai.008G077100.1 | .      |
| Gorai.007G214000.1 | .                  | Vv18g0859          | .                  | .      |
| Tc08_g000280       | Gorai.005G101900.1 | .                  | .                  | .      |
| Gorai.010G020900.1 | .                  | .                  | .                  | .      |
| .                  | .                  | .                  | .                  | .      |
| Vv07g1121          | Tc01_g005190       | .                  | Gorai.008G077000.1 | .      |
| Gorai.007G213900.1 | Gorai.003G025400.1 | Gorai.011G106000.1 | .                  | .      |

|                    |                    |                    |                    |                    |   |   |   |
|--------------------|--------------------|--------------------|--------------------|--------------------|---|---|---|
| .                  | .                  | .                  | .                  | .                  | . | . | . |
| Vv07g1122          | Tc01_g005180       | .                  | Gorai.008G076900.1 | .                  | . | . | . |
| Gorai.007G213800.1 | .                  | .                  | Gorai.011G105900.1 | .                  | . | . | . |
| .                  | .                  | .                  | .                  | .                  | . | . | . |
| Vv07g1123          | Tc01_g005170       | .                  | .                  | Gorai.007G213700.1 | . | . | . |
| Gorai.003G025300.1 | .                  | .                  | .                  | .                  | . | . | . |
| .                  | .                  | .                  | .                  | .                  | . | . | . |
| Vv07g1124          | Tc01_g005160       | Gorai.007G054600.1 | .                  | .                  | . | . | . |
| .                  | .                  | .                  | .                  | .                  | . | . | . |
| Vv07g1125          | .                  | .                  | .                  | .                  | . | . | . |
| .                  | .                  | .                  | .                  | .                  | . | . | . |
| Vv07g1126          | Tc01_g005150       | Gorai.007G054500.1 | .                  | .                  | . | . | . |
| .                  | .                  | .                  | .                  | .                  | . | . | . |
| Vv07g1127          | Tc01_g005120       | Gorai.007G054400.1 | .                  | .                  | . | . | . |
| .                  | Vv18g0864          | Tc08_g000340       | .                  | .                  | . | . | . |
| Gorai.005G102200.1 | .                  | .                  | .                  | .                  | . | . | . |
| Vv07g1128          | .                  | .                  | Gorai.007G213600.1 | .                  | . | . | . |
| .                  | .                  | .                  | .                  | .                  | . | . | . |
| Vv07g1129          | Tc01_g005080       | .                  | Gorai.008G076700.1 | .                  | . | . | . |
| .                  | .                  | .                  | .                  | .                  | . | . | . |
| Vv07g1130          | Tc01_g005070       | .                  | Gorai.008G076600.1 | .                  | . | . | . |
| .                  | Vv18g0865          | Tc08_g000350       | .                  | .                  | . | . | . |
| Gorai.009G212800.1 | .                  | Gorai.010G020400.1 | .                  | .                  | . | . | . |
| Vv07g1131          | Tc01_g005060       | .                  | Gorai.007G213500.1 | .                  | . | . | . |
| .                  | .                  | .                  | .                  | .                  | . | . | . |
| Vv07g1132          | Tc01_g005050       | .                  | Gorai.008G076000.1 | .                  | . | . | . |
| Gorai.007G213400.1 | Gorai.003G025200.1 | .                  | .                  | .                  | . | . | . |
| .                  | .                  | .                  | .                  | .                  | . | . | . |
| Vv07g1133          | .                  | .                  | .                  | .                  | . | . | . |
| .                  | .                  | .                  | .                  | .                  | . | . | . |
| Vv07g1134          | Tc01_g005040       | .                  | Gorai.007G213300.1 | .                  | . | . | . |
| Gorai.003G025100.1 | .                  | .                  | .                  | .                  | . | . | . |
| .                  | .                  | .                  | .                  | .                  | . | . | . |
| Vv07g1135          | .                  | .                  | .                  | .                  | . | . | . |
| Vv18g0873          | Tc08_g000400       | .                  | Gorai.005G102400.1 | .                  | . | . | . |
| .                  | Gorai.010G020200.1 | .                  | .                  | .                  | . | . | . |

|                    |                    |                    |                    |   |   |
|--------------------|--------------------|--------------------|--------------------|---|---|
| Vv07g1136          | Tc01_g004980       | .                  | Gorai.008G075900.1 | . | . |
| Gorai.007G213000.1 | Gorai.003G024600.1 | .                  | Gorai.011G105800.1 | . | . |
| .                  | .                  | .                  | .                  | . | . |
| Vv07g1137          | Tc01_g004970       | Gorai.007G053900.1 | .                  | . | . |
| Gorai.003G023500.1 | Gorai.011G105700.1 | .                  | .                  | . | . |
| .                  | .                  | .                  | .                  | . | . |
| Vv07g1138          | Tc01_g004960       | .                  | Gorai.007G212700.1 | . | . |
| .                  | .                  | .                  | .                  | . | . |
| Vv07g1139          | .                  | .                  | .                  | . | . |
| .                  | .                  | .                  | .                  | . | . |
| Vv07g1140          | .                  | .                  | .                  | . | . |
| .                  | .                  | .                  | .                  | . | . |
| Vv07g1141          | Tc01_g004950       | .                  | Gorai.             | . | . |
| 003G023300.1       | Gorai.011G105500.1 | .                  | .                  | . | . |
| .                  | .                  | .                  | .                  | . | . |
| Vv07g1142          | Tc01_g004940       | .                  | Gorai.007G212600.1 | . | . |
| .                  | .                  | .                  | .                  | . | . |
| Vv07g1143          | Tc01_g004930       | Gorai.008G075600.1 | .                  | . | . |
| Gorai.003G023200.1 | .                  | .                  | .                  | . | . |
| .                  | .                  | .                  | .                  | . | . |
| Vv07g1144          | Tc01_g004910       | Gorai.008G075400.1 | .                  | . | . |
| .                  | .                  | .                  | .                  | . | . |
| Vv07g1145          | Tc01_g004900       | Gorai.008G075300.1 | .                  | . | . |
| .                  | .                  | .                  | .                  | . | . |
| Vv07g1146          | Tc01_g004890       | Gorai.007G212400.1 | .                  | . | . |
| Gorai.003G023100.1 | .                  | .                  | .                  | . | . |
| .                  | .                  | .                  | .                  | . | . |
| Vv07g1147          | Tc01_g004860       | Gorai.008G074900.1 | .                  | . | . |
| Gorai.007G212200.1 | .                  | .                  | .                  | . | . |
| .                  | .                  | .                  | .                  | . | . |
| Vv07g1148          | Tc01_g004850       | Gorai.007G212100.1 | .                  | . | . |
| .                  | Vv18g0898          | Tc08_g000720       | Gorai.             | . | . |
| 002G128700.1       | .                  | .                  | .                  | . | . |
| .                  | .                  | .                  | .                  | . | . |
| Vv07g1149          | Tc01_g004840       | Gorai.007G211900.1 | .                  | . | . |
| .                  | .                  | .                  | .                  | . | . |
| .                  | .                  | .                  | .                  | . | . |

|                    |              |                    |                    |                    |        |   |   |
|--------------------|--------------|--------------------|--------------------|--------------------|--------|---|---|
| Vv07g1150          | .            | .                  | .                  | .                  | .      | . | . |
| .                  | .            | .                  | .                  | .                  | .      | . | . |
| Vv07g1151          | Tc01_g004820 | .                  | .                  | .                  | .      | . | . |
| .                  | .            | .                  | .                  | .                  | .      | . | . |
| Vv07g1152          | .            | .                  | Gorai.008G072100.1 | .                  | Gorai. | . | . |
| 007G211700.1       | .            | .                  | .                  | .                  | .      | . | . |
| .                  | .            | .                  | .                  | .                  | .      | . | . |
| Vv07g1153          | Tc01_g004810 | Gorai.007G051000.1 | .                  | .                  | .      | . | . |
| Gorai.007G211600.1 | .            | Gorai.011G105000.1 | Vv18g0908          | .                  | .      | . | . |
| .                  | .            | .                  | Gorai.010G017600.1 | .                  | .      | . | . |
| Vv07g1154          | Tc01_g004800 | .                  | .                  | .                  | .      | . | . |
| .                  | .            | .                  | .                  | .                  | .      | . | . |
| Vv07g1155          | Tc01_g004790 | .                  | .                  | Gorai.007G211400.1 | .      | . | . |
| Gorai.003G022900.1 | .            | .                  | .                  | .                  | .      | . | . |
| .                  | .            | .                  | .                  | .                  | .      | . | . |
| Vv07g1156          | Tc01_g004780 | Gorai.007G053800.1 | .                  | .                  | .      | . | . |
| Gorai.003G021700.1 | .            | Gorai.011G102000.1 | Vv18g0909          | .                  | .      | . | . |
| Tc08_g000830       | .            | Gorai.005G103900.1 | Gorai.             | .                  | .      | . | . |
| 009G210500.1       | .            | .                  | .                  | .                  | .      | . | . |
| .                  | .            | .                  | .                  | .                  | .      | . | . |
| Vv07g1157          | .            | .                  | .                  | .                  | .      | . | . |
| .                  | .            | .                  | .                  | .                  | .      | . | . |
| Vv07g1158          | Tc01_g004630 | .                  | .                  | .                  | Gorai. | . | . |
| 003G018700.1       | Vv18g0913    | Tc08_g000840       | .                  | .                  | .      | . | . |
| .                  | .            | .                  | .                  | .                  | .      | . | . |
| Vv07g1159          | Tc01_g004620 | .                  | .                  | .                  | .      | . | . |
| Vv18g0915          | Tc08_g000850 | .                  | .                  | .                  | .      | . | . |
| .                  | .            | .                  | .                  | .                  | .      | . | . |
| Vv07g1160          | .            | .                  | Gorai.007G210500.1 | .                  | .      | . | . |
| .                  | Vv18g0932    | Tc08_g000920       | .                  | .                  | .      | . | . |
| .                  | .            | .                  | .                  | .                  | .      | . | . |
| Vv07g1161          | .            | .                  | .                  | .                  | .      | . | . |
| .                  | .            | .                  | .                  | .                  | .      | . | . |
| Vv07g1162          | .            | .                  | .                  | .                  | .      | . | . |
| .                  | .            | .                  | .                  | .                  | .      | . | . |
| Vv07g1163          | .            | .                  | .                  | .                  | .      | . | . |
| .                  | .            | .                  | .                  | .                  | .      | . | . |
| Vv07g1164          | .            | .                  | .                  | .                  | .      | . | . |

|           |                    |                    |   |   |   |                    |   |
|-----------|--------------------|--------------------|---|---|---|--------------------|---|
| .         | .                  | .                  | . | . | . | .                  | . |
| .         | .                  | .                  | . | . | . | .                  | . |
| Vv07g1165 | .                  | .                  | . | . | . | .                  | . |
| .         | .                  | .                  | . | . | . | .                  | . |
| Vv07g1166 | .                  | .                  | . | . | . | .                  | . |
| .         | .                  | .                  | . | . | . | .                  | . |
| Vv07g1167 | .                  | .                  | . | . | . | Gorai.003G044700.1 | . |
| .         | .                  | .                  | . | . | . | .                  | . |
| Vv07g1168 | .                  | .                  | . | . | . | .                  | . |
| Vv18g0425 | Tc08_g009510       | .                  | . | . | . | Gorai.009G240100.1 | . |
| .         | .                  | .                  | . | . | . | .                  | . |
| Vv07g1169 | .                  | .                  | . | . | . | Gorai.003G044900.1 | . |
| .         | .                  | .                  | . | . | . | .                  | . |
| Vv07g1170 | .                  | .                  | . | . | . | .                  | . |
| Vv18g0423 | .                  | .                  | . | . | . | .                  | . |
| .         | .                  | .                  | . | . | . | .                  | . |
| Vv07g1171 | .                  | .                  | . | . | . | .                  | . |
| .         | .                  | .                  | . | . | . | .                  | . |
| Vv07g1172 | .                  | .                  | . | . | . | .                  | . |
| Vv18g0422 | .                  | .                  | . | . | . | .                  | . |
| .         | .                  | .                  | . | . | . | .                  | . |
| Vv07g1173 | .                  | .                  | . | . | . | .                  | . |
| .         | .                  | .                  | . | . | . | .                  | . |
| Vv07g1174 | Tc01_g004450       | .                  | . | . | . | Gorai.007G209900.1 | . |
| .         | Gorai.011G104400.1 | .                  | . | . | . | .                  | . |
| .         | .                  | .                  | . | . | . | .                  | . |
| Vv07g1175 | .                  | Gorai.007G061700.1 | . | . | . | .                  | . |
| .         | .                  | .                  | . | . | . | .                  | . |
| Vv07g1176 | .                  | .                  | . | . | . | .                  | . |
| .         | .                  | .                  | . | . | . | .                  | . |
| Vv07g1177 | Tc01_g004440       | .                  | . | . | . | Gorai.007G209700.1 | . |
| .         | .                  | .                  | . | . | . | .                  | . |
| Vv07g1178 | .                  | .                  | . | . | . | .                  | . |
| .         | .                  | .                  | . | . | . | .                  | . |
| Vv07g1179 | .                  | .                  | . | . | . | .                  | . |
| .         | .                  | .                  | . | . | . | .                  | . |
| Vv07g1180 | .                  | .                  | . | . | . | .                  | . |



|                    |              |                    |              |                    |                    |   |   |
|--------------------|--------------|--------------------|--------------|--------------------|--------------------|---|---|
| .                  | .            | .                  | .            | .                  | .                  | . | . |
| .                  | .            | .                  | .            | .                  | .                  | . | . |
| Vv07g1181          | .            | .                  | .            | .                  | .                  | . | . |
| .                  | .            | .                  | .            | .                  | .                  | . | . |
| Vv07g1182          | .            | .                  | .            | .                  | Gorai.003G045100.1 | . | . |
| .                  | .            | .                  | .            | .                  | .                  | . | . |
| Vv07g1183          | .            | .                  | .            | .                  | .                  | . | . |
| .                  | .            | .                  | .            | .                  | .                  | . | . |
| Vv07g1184          | .            | .                  | .            | .                  | .                  | . | . |
| .                  | .            | .                  | .            | .                  | .                  | . | . |
| Vv07g1185          | .            | .                  | .            | .                  | .                  | . | . |
| Vv18g0421          | Tc08_g009560 | .                  | .            | Gorai.005G093000.1 | .                  | . | . |
| .                  | .            | .                  | .            | .                  | .                  | . | . |
| Vv07g1186          | .            | .                  | .            | .                  | .                  | . | . |
| .                  | .            | .                  | .            | .                  | .                  | . | . |
| Vv07g1187          | .            | .                  | .            | .                  | Gorai.003G045300.1 | . | . |
| .                  | Vv18g0420    | .                  | Tc08_g009570 | .                  | .                  | . | . |
| Gorai.009G240400.1 | .            | .                  | .            | .                  | .                  | . | . |
| .                  | .            | .                  | .            | .                  | .                  | . | . |
| Vv07g1188          | .            | .                  | .            | .                  | .                  | . | . |
| Vv18g0419          | Tc08_g009580 | .                  | .            | .                  | .                  | . | . |
| .                  | .            | .                  | .            | .                  | .                  | . | . |
| Vv07g1189          | .            | .                  | .            | .                  | .                  | . | . |
| .                  | .            | .                  | .            | .                  | .                  | . | . |
| Vv07g1190          | .            | .                  | .            | .                  | .                  | . | . |
| .                  | .            | .                  | .            | .                  | .                  | . | . |
| Vv07g1191          | .            | .                  | .            | .                  | .                  | . | . |
| .                  | .            | .                  | .            | .                  | .                  | . | . |
| Vv07g1192          | .            | .                  | .            | .                  | Gorai.003G045400.1 | . | . |
| .                  | .            | .                  | .            | .                  | .                  | . | . |
| Vv07g1193          | .            | .                  | .            | .                  | Gorai.003G045500.1 | . | . |
| .                  | Vv18g0417    | .                  | .            | .                  | .                  | . | . |
| Vv07g1194          | .            | Gorai.007G061800.1 | .            | .                  | .                  | . | . |
| .                  | Vv18g0416    | .                  | .            | .                  | .                  | . | . |
| .                  | .            | .                  | .            | .                  | .                  | . | . |
| Vv07g1195          | .            | .                  | .            | .                  | .                  | . | . |
| .                  | .            | .                  | .            | .                  | .                  | . | . |
| Vv07g1196          | .            | .                  | .            | .                  | Gorai.             | . | . |

|                    |                    |   |   |   |                    |   |   |
|--------------------|--------------------|---|---|---|--------------------|---|---|
| 011G108600.1       | .                  | . | . | . | .                  | . | . |
| .                  | .                  | . | . | . | .                  | . | . |
| Vv07g1197          | .                  | . | . | . | .                  | . | . |
| .                  | .                  | . | . | . | .                  | . | . |
| Vv07g1198          | .                  | . | . | . | .                  | . | . |
| .                  | .                  | . | . | . | .                  | . | . |
| Vv07g1199          | .                  | . | . | . | .                  | . | . |
| .                  | .                  | . | . | . | .                  | . | . |
| Vv07g1200          | .                  | . | . | . | .                  | . | . |
| .                  | .                  | . | . | . | .                  | . | . |
| Vv07g1201          | .                  | . | . | . | .                  | . | . |
| Vv18g0404          | .                  | . | . | . | .                  | . | . |
| .                  | .                  | . | . | . | .                  | . | . |
| Vv07g1202          | .                  | . | . | . | .                  | . | . |
| Vv18g0403          | Tc08_g009730       | . | . | . | .                  | . | . |
| Gorai.010G045600.1 | .                  | . | . | . | .                  | . | . |
| .                  | .                  | . | . | . | .                  | . | . |
| Vv07g1203          | Tc01_g017090       | . | . | . | .                  | . | . |
| .                  | .                  | . | . | . | .                  | . | . |
| Vv07g1204          | .                  | . | . | . | .                  | . | . |
| .                  | .                  | . | . | . | .                  | . | . |
| Vv07g1205          | .                  | . | . | . | .                  | . | . |
| .                  | .                  | . | . | . | .                  | . | . |
| Vv07g1206          | .                  | . | . | . | .                  | . | . |
| .                  | .                  | . | . | . | .                  | . | . |
| Vv07g1207          | Gorai.007G062000.1 | . | . | . | .                  | . | . |
| .                  | .                  | . | . | . | .                  | . | . |
| Vv07g1208          | .                  | . | . | . | .                  | . | . |
| .                  | .                  | . | . | . | .                  | . | . |
| Vv07g1209          | .                  | . | . | . | .                  | . | . |
| .                  | .                  | . | . | . | .                  | . | . |
| Vv07g1210          | Tc01_g004130       | . | . | . | Gorai.007G208700.1 | . | . |
| .                  | .                  | . | . | . | .                  | . | . |
| Vv07g1211          | .                  | . | . | . | .                  | . | . |
| .                  | .                  | . | . | . | .                  | . | . |
| Vv07g1212          | .                  | . | . | . | .                  | . | . |
| .                  | .                  | . | . | . | .                  | . | . |

|              |              |                    |   |   |   |   |                    |   |
|--------------|--------------|--------------------|---|---|---|---|--------------------|---|
| Vv07g1213    | .            | .                  | . | . | . | . | .                  | . |
| .            | .            | .                  | . | . | . | . | .                  | . |
| Vv07g1214    | Tc01_g033100 | .                  | . | . | . | . | Gorai.             | . |
| 003G046300.1 | .            | .                  | . | . | . | . | .                  | . |
| Vv07g1215    | .            | .                  | . | . | . | . | .                  | . |
| .            | .            | .                  | . | . | . | . | .                  | . |
| Vv07g1216    | .            | .                  | . | . | . | . | .                  | . |
| .            | .            | .                  | . | . | . | . | .                  | . |
| Vv07g1217    | .            | .                  | . | . | . | . | Gorai.003G046500.1 | . |
| .            | .            | .                  | . | . | . | . | .                  | . |
| Vv07g1218    | .            | Gorai.007G062100.1 | . | . | . | . | .                  | . |
| .            | .            | .                  | . | . | . | . | .                  | . |
| Vv07g1219    | .            | .                  | . | . | . | . | .                  | . |
| .            | .            | .                  | . | . | . | . | .                  | . |
| Vv07g1220    | .            | .                  | . | . | . | . | .                  | . |
| .            | .            | .                  | . | . | . | . | .                  | . |
| Vv07g1221    | .            | .                  | . | . | . | . | Gorai.003G046700.1 | . |
| .            | .            | .                  | . | . | . | . | .                  | . |
| Vv07g1222    | .            | .                  | . | . | . | . | .                  | . |
| .            | .            | .                  | . | . | . | . | .                  | . |
| Vv07g1223    | .            | .                  | . | . | . | . | Gorai.             | . |
| 011G111600.1 | .            | .                  | . | . | . | . | .                  | . |
| Vv07g1224    | .            | .                  | . | . | . | . | .                  | . |
| .            | .            | .                  | . | . | . | . | .                  | . |
| Vv07g1225    | .            | .                  | . | . | . | . | Gorai.003G047000.1 | . |
| .            | .            | .                  | . | . | . | . | .                  | . |
| Vv07g1226    | .            | .                  | . | . | . | . | Gorai.003G047100.1 | . |
| .            | .            | .                  | . | . | . | . | .                  | . |
| Vv07g1227    | .            | .                  | . | . | . | . | Gorai.003G047200.1 | . |
| .            | .            | .                  | . | . | . | . | .                  | . |
| Vv07g1228    | .            | .                  | . | . | . | . | .                  | . |
| .            | .            | .                  | . | . | . | . | .                  | . |
| Vv07g1229    | .            | Gorai.007G062200.1 | . | . | . | . | .                  | . |

|              |                    |                    |   |   |                    |   |   |
|--------------|--------------------|--------------------|---|---|--------------------|---|---|
| .            | .                  | .                  | . | . | .                  | . | . |
| .            | .                  | .                  | . | . | .                  | . | . |
| Vv07g1230    | .                  | .                  | . | . | .                  | . | . |
| .            | .                  | .                  | . | . | .                  | . | . |
| .            | .                  | .                  | . | . | .                  | . | . |
| Vv07g1231    | Tc01_g033020       | .                  | . | . | .                  | . | . |
| .            | .                  | .                  | . | . | .                  | . | . |
| .            | .                  | .                  | . | . | .                  | . | . |
| Vv07g1232    | .                  | .                  | . | . | .                  | . | . |
| .            | .                  | .                  | . | . | .                  | . | . |
| .            | .                  | .                  | . | . | .                  | . | . |
| Vv07g1233    | .                  | Gorai.007G062300.1 | . | . | .                  | . | . |
| .            | .                  | .                  | . | . | .                  | . | . |
| .            | .                  | .                  | . | . | .                  | . | . |
| Vv07g1234    | .                  | .                  | . | . | .                  | . | . |
| .            | .                  | .                  | . | . | .                  | . | . |
| .            | .                  | .                  | . | . | .                  | . | . |
| Vv07g1235    | .                  | .                  | . | . | .                  | . | . |
| .            | .                  | .                  | . | . | .                  | . | . |
| .            | .                  | .                  | . | . | .                  | . | . |
| Vv07g1236    | .                  | .                  | . | . | Gorai.003G047600.1 | . | . |
| .            | .                  | .                  | . | . | .                  | . | . |
| .            | .                  | .                  | . | . | .                  | . | . |
| Vv07g1237    | .                  | .                  | . | . | .                  | . | . |
| .            | .                  | .                  | . | . | .                  | . | . |
| .            | .                  | .                  | . | . | .                  | . | . |
| Vv07g1238    | Tc01_g017140       | .                  | . | . | .                  | . | . |
| .            | .                  | .                  | . | . | .                  | . | . |
| .            | .                  | .                  | . | . | .                  | . | . |
| Vv07g1239    | .                  | .                  | . | . | .                  | . | . |
| .            | .                  | .                  | . | . | .                  | . | . |
| .            | .                  | .                  | . | . | .                  | . | . |
| Vv07g1240    | .                  | .                  | . | . | .                  | . | . |
| .            | .                  | .                  | . | . | .                  | . | . |
| .            | .                  | .                  | . | . | .                  | . | . |
| Vv07g1241    | .                  | .                  | . | . | .                  | . | . |
| .            | .                  | .                  | . | . | .                  | . | . |
| .            | .                  | .                  | . | . | .                  | . | . |
| Vv07g1242    | .                  | .                  | . | . | .                  | . | . |
| .            | .                  | .                  | . | . | .                  | . | . |
| .            | .                  | .                  | . | . | .                  | . | . |
| Vv07g1243    | .                  | .                  | . | . | .                  | . | . |
| .            | .                  | .                  | . | . | .                  | . | . |
| .            | .                  | .                  | . | . | .                  | . | . |
| Vv07g1244    | Tc01_g040940       | Gorai.007G062600.1 | . | . | .                  | . | . |
| .            | .                  | .                  | . | . | .                  | . | . |
| .            | .                  | .                  | . | . | .                  | . | . |
| Vv07g1245    | Tc01_g017430       | .                  | . | . | Gorai.             | . | . |
| 003G047800.1 | Gorai.011G114200.1 | .                  | . | . | .                  | . | . |
| .            | .                  | .                  | . | . | .                  | . | . |

|              |                    |   |   |   |                    |   |
|--------------|--------------------|---|---|---|--------------------|---|
| Vv07g1246    | Tc01_g011970       | . | . | . | .                  | . |
| .            | .                  | . | . | . | .                  | . |
| Vv07g1247    | .                  | . | . | . | Gorai.             | . |
| 011G114300.1 | .                  | . | . | . | .                  | . |
| Vv07g1248    | Gorai.007G062700.1 | . | . | . | .                  | . |
| .            | .                  | . | . | . | .                  | . |
| Vv07g1249    | .                  | . | . | . | .                  | . |
| .            | .                  | . | . | . | .                  | . |
| Vv07g1250    | .                  | . | . | . | .                  | . |
| .            | .                  | . | . | . | .                  | . |
| Vv07g1251    | .                  | . | . | . | Gorai.003G048000.1 | . |
| .            | .                  | . | . | . | .                  | . |
| Vv07g1252    | .                  | . | . | . | .                  | . |
| .            | .                  | . | . | . | .                  | . |
| Vv07g1253    | Tc01_g017650       | . | . | . | .                  | . |
| .            | .                  | . | . | . | .                  | . |
| Vv07g1254    | .                  | . | . | . | .                  | . |
| .            | .                  | . | . | . | .                  | . |
| Vv07g1255    | .                  | . | . | . | .                  | . |
| .            | .                  | . | . | . | .                  | . |
| Vv07g1256    | .                  | . | . | . | .                  | . |
| .            | .                  | . | . | . | .                  | . |
| Vv07g1257    | .                  | . | . | . | .                  | . |
| .            | .                  | . | . | . | .                  | . |
| Vv07g1258    | .                  | . | . | . | .                  | . |
| .            | .                  | . | . | . | .                  | . |
| Vv07g1259    | Tc01_g040840       | . | . | . | .                  | . |
| .            | .                  | . | . | . | .                  | . |
| Vv07g1260    | Tc01_g032940       | . | . | . | .                  | . |
| .            | .                  | . | . | . | .                  | . |
| Vv07g1261    | .                  | . | . | . | .                  | . |
| .            | .                  | . | . | . | .                  | . |
| Vv07g1262    | .                  | . | . | . | .                  | . |

|                    |              |                    |   |   |   |                    |   |
|--------------------|--------------|--------------------|---|---|---|--------------------|---|
| .                  | .            | .                  | . | . | . | .                  | . |
| .                  | .            | .                  | . | . | . | .                  | . |
| Vv07g1263          | Tc01_g017770 | .                  | . | . | . | .                  | . |
| .                  | .            | .                  | . | . | . | .                  | . |
| Vv07g1264          | .            | .                  | . | . | . | .                  | . |
| .                  | .            | .                  | . | . | . | .                  | . |
| Vv07g1265          | .            | .                  | . | . | . | Gorai.             | . |
| 011G114700.1       | .            | .                  | . | . | . | .                  | . |
| .                  | .            | .                  | . | . | . | .                  | . |
| Vv07g1266          | .            | .                  | . | . | . | .                  | . |
| Vv018rg0071        | .            | .                  | . | . | . | .                  | . |
| .                  | .            | .                  | . | . | . | .                  | . |
| Vv07g1267          | .            | .                  | . | . | . | .                  | . |
| .                  | .            | .                  | . | . | . | .                  | . |
| Vv07g1268          | .            | .                  | . | . | . | .                  | . |
| .                  | .            | .                  | . | . | . | .                  | . |
| Vv07g1269          | .            | Gorai.007G063000.1 | . | . | . | .                  | . |
| Gorai.003G048400.1 | .            | .                  | . | . | . | .                  | . |
| .                  | .            | .                  | . | . | . | .                  | . |
| Vv07g1270          | .            | .                  | . | . | . | .                  | . |
| .                  | .            | .                  | . | . | . | .                  | . |
| Vv07g1271          | .            | .                  | . | . | . | .                  | . |
| .                  | .            | .                  | . | . | . | .                  | . |
| Vv07g1272          | Tc01_g032930 | .                  | . | . | . | .                  | . |
| Vv018rg0082        | .            | .                  | . | . | . | .                  | . |
| .                  | .            | .                  | . | . | . | .                  | . |
| Vv07g1273          | .            | .                  | . | . | . | .                  | . |
| .                  | .            | .                  | . | . | . | .                  | . |
| Vv07g1274          | .            | .                  | . | . | . | .                  | . |
| .                  | .            | .                  | . | . | . | .                  | . |
| Vv07g1275          | .            | .                  | . | . | . | Gorai.003G048800.1 | . |
| Gorai.011G114900.1 | .            | .                  | . | . | . | .                  | . |
| .                  | .            | .                  | . | . | . | .                  | . |
| Vv07g1276          | .            | .                  | . | . | . | .                  | . |
| .                  | .            | .                  | . | . | . | .                  | . |
| Vv07g1277          | .            | .                  | . | . | . | Gorai.003G048900.1 | . |
| .                  | .            | .                  | . | . | . | .                  | . |
| Vv07g1278          | Tc01_g032180 | .                  | . | . | . | .                  | . |

|              |                    |                    |                    |   |   |                    |   |
|--------------|--------------------|--------------------|--------------------|---|---|--------------------|---|
| .            | .                  | .                  | .                  | . | . | .                  | . |
| .            | .                  | .                  | .                  | . | . | .                  | . |
| Vv07g1279    | .                  | .                  | .                  | . | . | Gorai.             | . |
| 011G115000.1 | .                  | .                  | .                  | . | . | .                  | . |
| .            | .                  | .                  | .                  | . | . | .                  | . |
| Vv07g1280    | Tc01_g040830       | .                  | .                  | . | . | Gorai.             | . |
| 003G049000.1 | .                  | .                  | .                  | . | . | .                  | . |
| .            | .                  | .                  | .                  | . | . | .                  | . |
| Vv07g1281    | .                  | .                  | .                  | . | . | .                  | . |
| Vv018rg0089  | .                  | .                  | .                  | . | . | .                  | . |
| .            | .                  | .                  | .                  | . | . | .                  | . |
| Vv07g1282    | .                  | Gorai.007G063100.1 | .                  | . | . | .                  | . |
| .            | Vv018rg0091        | .                  | .                  | . | . | .                  | . |
| .            | Vv18g0206          | Tc08_g004090       | Gorai.002G121600.1 | . | . | .                  | . |
| .            | Gorai.009G192000.1 | .                  | .                  | . | . | .                  | . |
| Vv07g1283    | .                  | .                  | .                  | . | . | .                  | . |
| Vv018rg0092  | .                  | .                  | .                  | . | . | .                  | . |
| .            | .                  | .                  | .                  | . | . | .                  | . |
| Vv07g1284    | Tc01_g012330       | .                  | .                  | . | . | .                  | . |
| .            | .                  | .                  | .                  | . | . | .                  | . |
| .            | .                  | .                  | .                  | . | . | .                  | . |
| Vv07g1285    | .                  | .                  | .                  | . | . | Gorai.             | . |
| 011G115100.1 | Vv018rg0096        | .                  | .                  | . | . | .                  | . |
| .            | .                  | .                  | .                  | . | . | .                  | . |
| Vv07g1286    | .                  | .                  | .                  | . | . | Gorai.003G049500.1 | . |
| .            | Vv018rg0102        | .                  | .                  | . | . | .                  | . |
| .            | .                  | .                  | .                  | . | . | .                  | . |
| Vv07g1287    | .                  | .                  | .                  | . | . | .                  | . |
| .            | .                  | .                  | .                  | . | . | .                  | . |
| .            | .                  | .                  | .                  | . | . | .                  | . |
| Vv07g1288    | .                  | .                  | .                  | . | . | .                  | . |
| .            | .                  | .                  | .                  | . | . | .                  | . |
| .            | .                  | .                  | .                  | . | . | .                  | . |
| Vv07g1289    | Tc01_g000430       | .                  | .                  | . | . | Gorai.             | . |
| 003G001900.1 | .                  | .                  | .                  | . | . | .                  | . |
| .            | .                  | .                  | .                  | . | . | .                  | . |
| Vv07g1290    | Tc01_g000420       | .                  | .                  | . | . | Gorai.             | . |
| 003G001800.1 | .                  | .                  | .                  | . | . | .                  | . |
| .            | .                  | .                  | .                  | . | . | .                  | . |
| Vv07g1291    | Tc01_g000400       | .                  | .                  | . | . | Gorai.             | . |
| 003G001600.1 | .                  | .                  | .                  | . | . | .                  | . |
| .            | .                  | .                  | .                  | . | . | .                  | . |
| Vv07g1292    | Tc01_g000380       | .                  | .                  | . | . | .                  | . |
| .            | .                  | .                  | .                  | . | . | .                  | . |
| .            | .                  | .                  | .                  | . | . | .                  | . |
| Vv07g1293    | Tc01_g000370       | .                  | .                  | . | . | Gorai.             | . |
| 003G001500.1 | .                  | .                  | .                  | . | . | .                  | . |
| .            | .                  | .                  | .                  | . | . | .                  | . |
| Vv07g1294    | Tc01_g000360       | .                  | .                  | . | . | Gorai.             | . |
| 003G001400.1 | .                  | .                  | .                  | . | . | .                  | . |

|                                       |                                    |   |   |   |                    |
|---------------------------------------|------------------------------------|---|---|---|--------------------|
| Vv07g1295<br>003G001300.1             | Tc01_g000340                       | . | . | . | Gorai.             |
| Vv07g1296                             | Tc01_g000330                       | . | . | . | .                  |
| Vv07g1297<br>003G001200.1             | Tc01_g000310                       | . | . | . | Gorai.             |
| Vv07g1298                             | .                                  | . | . | . | .                  |
| Vv07g1299                             | .                                  | . | . | . | .                  |
| Vv07g1300                             | Tc01_g000300                       | . | . | . | .                  |
| Vv07g1301                             | .                                  | . | . | . | .                  |
| Vv07g1302                             | Tc01_g000290                       | . | . | . | .                  |
| Vv07g1303<br>003G000900.1             | Tc01_g000270                       | . | . | . | Gorai.             |
| Vv07g1304                             | .                                  | . | . | . | .                  |
| Vv07g1305                             | Tc01_g032780                       | . | . | . | .                  |
| Vv07g1306                             | Tc01_g000260                       | . | . | . | .                  |
| Vv07g1307                             | Tc01_g000250                       | . | . | . | .                  |
| Vv07g1308                             | .                                  | . | . | . | .                  |
| Vv07g1309                             | Tc01_g031740                       | . | . | . | .                  |
| Vv07g1310<br>Vv018rg0142<br>Vv18g0232 | Tc08_g011440<br>Gorai.010G050100.1 | . | . | . | Gorai.009G249600.1 |



|                    |              |   |   |   |                    |   |   |
|--------------------|--------------|---|---|---|--------------------|---|---|
| Vv07g1311          | .            | . | . | . | .                  | . | . |
| .                  | .            | . | . | . | .                  | . | . |
| Vv07g1312          | .            | . | . | . | .                  | . | . |
| .                  | .            | . | . | . | .                  | . | . |
| Vv07g1313          | .            | . | . | . | .                  | . | . |
| .                  | .            | . | . | . | .                  | . | . |
| Vv07g1314          | .            | . | . | . | .                  | . | . |
| .                  | .            | . | . | . | .                  | . | . |
| Vv07g1315          | .            | . | . | . | .                  | . | . |
| .                  | .            | . | . | . | .                  | . | . |
| Vv07g1316          | Tc01_g019580 | . | . | . | .                  | . | . |
| .                  | .            | . | . | . | .                  | . | . |
| Vv07g1317          | Tc01_g012530 | . | . | . | .                  | . | . |
| .                  | .            | . | . | . | .                  | . | . |
| Vv07g1318          | .            | . | . | . | .                  | . | . |
| Vv18g0253          | .            | . | . | . | .                  | . | . |
| .                  | .            | . | . | . | .                  | . | . |
| Vv07g1319          | .            | . | . | . | .                  | . | . |
| .                  | .            | . | . | . | .                  | . | . |
| Vv07g1320          | .            | . | . | . | .                  | . | . |
| .                  | .            | . | . | . | .                  | . | . |
| Vv07g1321          | Tc01_g012580 | . | . | . | .                  | . | . |
| Vv18g0261          | .            | . | . | . | Gorai.009G248600.1 | . | . |
| .                  | .            | . | . | . | .                  | . | . |
| Vv07g1322          | .            | . | . | . | .                  | . | . |
| .                  | .            | . | . | . | .                  | . | . |
| Vv07g1323          | .            | . | . | . | .                  | . | . |
| .                  | .            | . | . | . | .                  | . | . |
| Vv07g1324          | Tc01_g012610 | . | . | . | .                  | . | . |
| .                  | .            | . | . | . | .                  | . | . |
| Vv07g1325          | .            | . | . | . | .                  | . | . |
| .                  | .            | . | . | . | .                  | . | . |
| Vv07g1326          | Tc01_g012690 | . | . | . | .                  | . | . |
| Vv18g0275          | Tc08_g010990 | . | . | . | .                  | . | . |
| Gorai.010G052300.1 | .            | . | . | . | .                  | . | . |
| .                  | .            | . | . | . | .                  | . | . |

|                    |                    |              |                    |                    |   |   |   |
|--------------------|--------------------|--------------|--------------------|--------------------|---|---|---|
| Vv07g1327          | .                  | .            | .                  | .                  | . | . | . |
| .                  | .                  | .            | .                  | .                  | . | . | . |
| Vv07g1328          | .                  | .            | .                  | .                  | . | . | . |
| .                  | .                  | .            | .                  | .                  | . | . | . |
| Vv07g1329          | .                  | .            | .                  | .                  | . | . | . |
| .                  | .                  | .            | .                  | .                  | . | . | . |
| Vv07g1330          | .                  | .            | .                  | .                  | . | . | . |
| .                  | .                  | .            | .                  | .                  | . | . | . |
| Vv07g1331          | .                  | .            | .                  | .                  | . | . | . |
| .                  | .                  | .            | .                  | .                  | . | . | . |
| Vv07g1332          | Tc01_g032690       | .            | .                  | .                  | . | . | . |
| .                  | .                  | .            | .                  | .                  | . | . | . |
| Vv07g1333          | Tc01_g019650       | .            | .                  | .                  | . | . | . |
| .                  | .                  | .            | .                  | .                  | . | . | . |
| Vv07g1334          | .                  | .            | .                  | .                  | . | . | . |
| .                  | .                  | .            | .                  | .                  | . | . | . |
| Vv07g1335          | .                  | .            | .                  | .                  | . | . | . |
| .                  | .                  | .            | .                  | .                  | . | . | . |
| Vv07g1336          | .                  | .            | .                  | .                  | . | . | . |
| .                  | .                  | .            | .                  | .                  | . | . | . |
| Vv07g1337          | Tc01_g012700       | .            | .                  | .                  | . | . | . |
|                    | Vv18g0276          | Tc08_g010980 | .                  | .                  | . | . | . |
|                    | Gorai.010G052200.1 | .            | .                  | .                  | . | . | . |
| .                  | .                  | .            | .                  | .                  | . | . | . |
| Vv07g1338          | Tc01_g012710       | .            | .                  | .                  | . | . | . |
| .                  | .                  | .            | .                  | .                  | . | . | . |
| Vv07g1339          | Tc01_g012720       | .            | .                  | .                  | . | . | . |
|                    | Vv18g0286          | .            | .                  | Gorai.005G089000.1 | . | . | . |
| .                  | .                  | .            | .                  | .                  | . | . | . |
| Vv07g1340          | .                  | .            | .                  | .                  | . | . | . |
| .                  | .                  | .            | .                  | .                  | . | . | . |
| Vv07g1341          | .                  | .            | .                  | .                  | . | . | . |
| .                  | .                  | .            | .                  | .                  | . | . | . |
| Vv07g1342          | Tc01_g012750       | .            | .                  | .                  | . | . | . |
|                    | Vv18g0287          | .            | .                  | Gorai.005G089100.1 | . | . | . |
| Gorai.009G247000.1 | .                  | .            | Gorai.010G051500.1 | .                  | . | . | . |

|              |                    |   |                    |   |                    |   |   |
|--------------|--------------------|---|--------------------|---|--------------------|---|---|
| Vv07g1343    | .                  | . | .                  | . | .                  | . | . |
| .            | .                  | . | .                  | . | .                  | . | . |
| Vv07g1344    | Tc01_g012760       | . | .                  | . | .                  | . | . |
| .            | .                  | . | .                  | . | .                  | . | . |
| Vv07g1345    | Tc01_g012770       | . | .                  | . | .                  | . | . |
| .            | .                  | . | .                  | . | .                  | . | . |
| Vv07g1346    | Tc01_g012790       | . | .                  | . | .                  | . | . |
| Vv18g0289    | .                  | . | .                  | . | Gorai.009G246800.1 | . | . |
| .            | .                  | . | .                  | . | .                  | . | . |
| Vv07g1347    | .                  | . | .                  | . | .                  | . | . |
| .            | .                  | . | .                  | . | .                  | . | . |
| Vv07g1348    | .                  | . | .                  | . | .                  | . | . |
| Vv18g0290    | .                  | . | Gorai.005G089200.1 | . | Gorai.             | . | . |
| 009G246700.1 | Gorai.009G283800.1 | . | .                  | . | .                  | . | . |
| .            | .                  | . | .                  | . | .                  | . | . |
| Vv07g1349    | .                  | . | .                  | . | .                  | . | . |
| .            | .                  | . | .                  | . | .                  | . | . |
| Vv07g1350    | Tc01_g021140       | . | .                  | . | .                  | . | . |
| .            | .                  | . | .                  | . | .                  | . | . |
| Vv07g1351    | .                  | . | .                  | . | .                  | . | . |
| .            | .                  | . | .                  | . | .                  | . | . |
| Vv07g1352    | Tc01_g012850       | . | .                  | . | .                  | . | . |
| .            | .                  | . | .                  | . | .                  | . | . |
| Vv07g1353    | Tc01_g012860       | . | .                  | . | .                  | . | . |
| .            | .                  | . | .                  | . | .                  | . | . |
| Vv07g1354    | .                  | . | .                  | . | .                  | . | . |
| .            | .                  | . | .                  | . | .                  | . | . |
| Vv07g1355    | Tc01_g012870       | . | .                  | . | .                  | . | . |
| Vv18g0303    | Tc08_g003390       | . | .                  | . | Gorai.             | . | . |
| 009G245900.1 | Gorai.009G280500.1 | . | Gorai.010G050400.1 | . | .                  | . | . |
| .            | .                  | . | .                  | . | .                  | . | . |
| Vv07g1356    | .                  | . | .                  | . | .                  | . | . |
| .            | .                  | . | .                  | . | .                  | . | . |
| Vv07g1357    | .                  | . | .                  | . | .                  | . | . |
| .            | .                  | . | .                  | . | .                  | . | . |
| Vv07g1358    | Tc01_g012890       | . | .                  | . | .                  | . | . |

|                    |              |   |   |   |   |   |   |
|--------------------|--------------|---|---|---|---|---|---|
| .                  | .            | . | . | . | . | . | . |
| Vv07g1359          | .            | . | . | . | . | . | . |
| .                  | .            | . | . | . | . | . | . |
| Vv07g1360          | Tc01_g020690 | . | . | . | . | . | . |
| Vv18g0305          | .            | . | . | . | . | . | . |
| Gorai.010G050300.1 | .            | . | . | . | . | . | . |
| .                  | .            | . | . | . | . | . | . |
| Vv07g1361          | Tc01_g012920 | . | . | . | . | . | . |
| .                  | .            | . | . | . | . | . | . |
| Vv07g1362          | .            | . | . | . | . | . | . |
| .                  | .            | . | . | . | . | . | . |
| Vv07g1363          | .            | . | . | . | . | . | . |
| .                  | .            | . | . | . | . | . | . |
| Vv07g1364          | .            | . | . | . | . | . | . |
| .                  | .            | . | . | . | . | . | . |
| Vv07g1365          | .            | . | . | . | . | . | . |
| .                  | .            | . | . | . | . | . | . |
| Vv07g1366          | .            | . | . | . | . | . | . |
| .                  | .            | . | . | . | . | . | . |
| Vv07g1367          | Tc01_g012990 | . | . | . | . | . | . |
| .                  | .            | . | . | . | . | . | . |
| Vv07g1368          | .            | . | . | . | . | . | . |
| .                  | .            | . | . | . | . | . | . |
| Vv07g1369          | .            | . | . | . | . | . | . |
| .                  | .            | . | . | . | . | . | . |
| Vv07g1370          | .            | . | . | . | . | . | . |
| .                  | .            | . | . | . | . | . | . |
| Vv07g1371          | Tc01_g013010 | . | . | . | . | . | . |
| .                  | .            | . | . | . | . | . | . |
| Vv07g1372          | .            | . | . | . | . | . | . |
| .                  | .            | . | . | . | . | . | . |
| Vv07g1373          | .            | . | . | . | . | . | . |
| .                  | .            | . | . | . | . | . | . |
| Vv07g1374          | .            | . | . | . | . | . | . |
| .                  | .            | . | . | . | . | . | . |

|           |              |   |   |   |   |   |
|-----------|--------------|---|---|---|---|---|
| Vv07g1375 | Tc01_g013040 | . | . | . | . | . |
| Vv18g0320 | .            | . | . | . | . | . |
| Vv07g1376 | Tc01_g013050 | . | . | . | . | . |
| .         | .            | . | . | . | . | . |
| Vv07g1377 | Tc01_g024230 | . | . | . | . | . |
| .         | .            | . | . | . | . | . |
| Vv07g1378 | .            | . | . | . | . | . |
| .         | .            | . | . | . | . | . |
| Vv07g1379 | .            | . | . | . | . | . |
| .         | .            | . | . | . | . | . |
| Vv07g1380 | Tc01_g024100 | . | . | . | . | . |
| .         | .            | . | . | . | . | . |
| Vv07g1381 | Tc01_g013060 | . | . | . | . | . |
| .         | .            | . | . | . | . | . |
| Vv07g1382 | .            | . | . | . | . | . |
| .         | .            | . | . | . | . | . |
| Vv07g1383 | .            | . | . | . | . | . |
| .         | .            | . | . | . | . | . |
| Vv07g1384 | .            | . | . | . | . | . |
| .         | .            | . | . | . | . | . |
| Vv07g1385 | .            | . | . | . | . | . |
| .         | .            | . | . | . | . | . |
| Vv07g1386 | .            | . | . | . | . | . |
| .         | .            | . | . | . | . | . |
| Vv07g1387 | .            | . | . | . | . | . |
| .         | .            | . | . | . | . | . |
| Vv07g1388 | .            | . | . | . | . | . |
| .         | .            | . | . | . | . | . |
| Vv07g1389 | .            | . | . | . | . | . |
| .         | .            | . | . | . | . | . |
| Vv07g1390 | Tc01_g023780 | . | . | . | . | . |
| .         | .            | . | . | . | . | . |
| Vv07g1391 | .            | . | . | . | . | . |

|           |              |  |  |  |  |  |  |
|-----------|--------------|--|--|--|--|--|--|
| Vv07g1392 |              |  |  |  |  |  |  |
| Vv07g1393 |              |  |  |  |  |  |  |
| Vv07g1394 |              |  |  |  |  |  |  |
| Vv07g1395 |              |  |  |  |  |  |  |
| Vv07g1396 |              |  |  |  |  |  |  |
| Vv07g1397 |              |  |  |  |  |  |  |
| Vv07g1398 |              |  |  |  |  |  |  |
| Vv07g1399 |              |  |  |  |  |  |  |
| Vv07g1400 |              |  |  |  |  |  |  |
| Vv07g1401 | Tc01_g022950 |  |  |  |  |  |  |
| Vv07g1402 |              |  |  |  |  |  |  |
| Vv07g1403 |              |  |  |  |  |  |  |
| Vv07g1404 |              |  |  |  |  |  |  |
| Vv07g1405 |              |  |  |  |  |  |  |
| Vv07g1406 |              |  |  |  |  |  |  |
| Vv07g1407 |              |  |  |  |  |  |  |

|           |              |   |   |   |   |   |
|-----------|--------------|---|---|---|---|---|
| Vv07g1408 | Tc01_g013440 | . | . | . | . | . |
| .         | .            | . | . | . | . | . |
| Vv07g1409 | .            | . | . | . | . | . |
| .         | .            | . | . | . | . | . |
| Vv08g0001 | .            | . | . | . | . | . |
| .         | .            | . | . | . | . | . |
| Vv08g0002 | .            | . | . | . | . | . |
| .         | .            | . | . | . | . | . |
| Vv08g0003 | .            | . | . | . | . | . |
| .         | .            | . | . | . | . | . |
| Vv08g0004 | .            | . | . | . | . | . |
| .         | .            | . | . | . | . | . |
| Vv08g0005 | .            | . | . | . | . | . |
| Vv01g0416 | .            | . | . | . | . | . |
| .         | .            | . | . | . | . | . |
| Vv08g0006 | .            | . | . | . | . | . |
| .         | .            | . | . | . | . | . |
| Vv08g0007 | .            | . | . | . | . | . |
| .         | .            | . | . | . | . | . |
| Vv08g0008 | .            | . | . | . | . | . |
| .         | .            | . | . | . | . | . |
| Vv08g0009 | .            | . | . | . | . | . |
| .         | .            | . | . | . | . | . |
| Vv08g0010 | .            | . | . | . | . | . |
| .         | .            | . | . | . | . | . |
| Vv08g0011 | .            | . | . | . | . | . |
| .         | .            | . | . | . | . | . |
| Vv08g0012 | .            | . | . | . | . | . |
| .         | .            | . | . | . | . | . |
| Vv08g0013 | .            | . | . | . | . | . |
| .         | .            | . | . | . | . | . |
| Vv08g0014 | .            | . | . | . | . | . |
| .         | .            | . | . | . | . | . |
| Vv08g0015 | .            | . | . | . | . | . |
| .         | .            | . | . | . | . | . |

|           |              |   |   |   |   |   |   |
|-----------|--------------|---|---|---|---|---|---|
| Vv08g0016 | .            | . | . | . | . | . | . |
| .         | .            | . | . | . | . | . | . |
| Vv08g0017 | .            | . | . | . | . | . | . |
| .         | .            | . | . | . | . | . | . |
| Vv08g0018 | .            | . | . | . | . | . | . |
| .         | .            | . | . | . | . | . | . |
| Vv08g0019 | .            | . | . | . | . | . | . |
| .         | .            | . | . | . | . | . | . |
| Vv08g0020 | .            | . | . | . | . | . | . |
| .         | .            | . | . | . | . | . | . |
| Vv08g0021 | .            | . | . | . | . | . | . |
| .         | .            | . | . | . | . | . | . |
| Vv08g0022 | .            | . | . | . | . | . | . |
| .         | .            | . | . | . | . | . | . |
| Vv08g0023 | Tc05_g026350 | . | . | . | . | . | . |
| .         | .            | . | . | . | . | . | . |
| Vv08g0024 | .            | . | . | . | . | . | . |
| .         | .            | . | . | . | . | . | . |
| Vv08g0025 | Tc05_g026080 | . | . | . | . | . | . |
| .         | .            | . | . | . | . | . | . |
| Vv08g0026 | .            | . | . | . | . | . | . |
| .         | .            | . | . | . | . | . | . |
| Vv08g0027 | .            | . | . | . | . | . | . |
| .         | .            | . | . | . | . | . | . |
| Vv08g0028 | .            | . | . | . | . | . | . |
| .         | .            | . | . | . | . | . | . |
| Vv08g0029 | .            | . | . | . | . | . | . |
| .         | .            | . | . | . | . | . | . |
| Vv08g0030 | Tc05_g020760 | . | . | . | . | . | . |
| .         | .            | . | . | . | . | . | . |
| Vv08g0031 | .            | . | . | . | . | . | . |
| .         | .            | . | . | . | . | . | . |
| Vv08g0032 | .            | . | . | . | . | . | . |



|           |              |   |   |   |   |   |   |
|-----------|--------------|---|---|---|---|---|---|
| .         | .            | . | . | . | . | . | . |
| Vv08g0033 | .            | . | . | . | . | . | . |
| .         | .            | . | . | . | . | . | . |
| Vv08g0034 | .            | . | . | . | . | . | . |
| .         | .            | . | . | . | . | . | . |
| Vv08g0035 | .            | . | . | . | . | . | . |
| .         | .            | . | . | . | . | . | . |
| Vv08g0036 | .            | . | . | . | . | . | . |
| .         | .            | . | . | . | . | . | . |
| Vv08g0037 | .            | . | . | . | . | . | . |
| .         | .            | . | . | . | . | . | . |
| Vv08g0038 | .            | . | . | . | . | . | . |
| .         | .            | . | . | . | . | . | . |
| Vv08g0039 | .            | . | . | . | . | . | . |
| .         | .            | . | . | . | . | . | . |
| Vv08g0040 | .            | . | . | . | . | . | . |
| Vv01g0436 | Tc02_g017610 | . | . | . | . | . | . |
| .         | .            | . | . | . | . | . | . |
| Vv08g0041 | .            | . | . | . | . | . | . |
| .         | .            | . | . | . | . | . | . |
| Vv08g0042 | .            | . | . | . | . | . | . |
| .         | .            | . | . | . | . | . | . |
| Vv08g0043 | .            | . | . | . | . | . | . |
| .         | .            | . | . | . | . | . | . |
| Vv08g0044 | .            | . | . | . | . | . | . |
| .         | .            | . | . | . | . | . | . |
| Vv08g0045 | .            | . | . | . | . | . | . |
| .         | .            | . | . | . | . | . | . |
| Vv08g0046 | .            | . | . | . | . | . | . |
| .         | .            | . | . | . | . | . | . |
| Vv08g0047 | .            | . | . | . | . | . | . |
| .         | .            | . | . | . | . | . | . |
| Vv08g0048 | .            | . | . | . | . | . | . |
| .         | .            | . | . | . | . | . | . |
| .         | .            | . | . | . | . | . | . |

|              |              |   |   |   |   |        |   |
|--------------|--------------|---|---|---|---|--------|---|
| Vv08g0049    | .            | . | . | . | . | .      | . |
| .            | .            | . | . | . | . | .      | . |
| .            | .            | . | . | . | . | .      | . |
| Vv08g0050    | Tc05_g003940 | . | . | . | . | Gorai. | . |
| 012G106700.1 | .            | . | . | . | . | .      | . |
| .            | .            | . | . | . | . | .      | . |
| Vv08g0051    | Tc05_g003950 | . | . | . | . | .      | . |
| .            | .            | . | . | . | . | .      | . |
| .            | .            | . | . | . | . | .      | . |
| Vv08g0052    | Tc05_g004050 | . | . | . | . | .      | . |
| .            | .            | . | . | . | . | .      | . |
| .            | .            | . | . | . | . | .      | . |
| Vv08g0053    | .            | . | . | . | . | .      | . |
| .            | .            | . | . | . | . | .      | . |
| .            | .            | . | . | . | . | .      | . |
| Vv08g0054    | .            | . | . | . | . | .      | . |
| .            | .            | . | . | . | . | .      | . |
| .            | .            | . | . | . | . | .      | . |
| Vv08g0055    | .            | . | . | . | . | .      | . |
| Vv12g0469    | .            | . | . | . | . | Gorai. | . |
| 001G104700.1 | .            | . | . | . | . | .      | . |
| Vv08g0056    | Tc05_g021070 | . | . | . | . | .      | . |
| .            | .            | . | . | . | . | .      | . |
| .            | .            | . | . | . | . | .      | . |
| Vv08g0057    | .            | . | . | . | . | .      | . |
| .            | .            | . | . | . | . | .      | . |
| .            | .            | . | . | . | . | .      | . |
| Vv08g0058    | .            | . | . | . | . | .      | . |
| .            | .            | . | . | . | . | .      | . |
| .            | .            | . | . | . | . | .      | . |
| Vv08g0059    | .            | . | . | . | . | .      | . |
| .            | .            | . | . | . | . | .      | . |
| .            | .            | . | . | . | . | .      | . |
| Vv08g0060    | .            | . | . | . | . | .      | . |
| .            | .            | . | . | . | . | .      | . |
| .            | .            | . | . | . | . | .      | . |
| Vv08g0061    | Tc05_g022730 | . | . | . | . | .      | . |
| .            | .            | . | . | . | . | .      | . |
| .            | .            | . | . | . | . | .      | . |
| Vv08g0062    | .            | . | . | . | . | .      | . |
| .            | .            | . | . | . | . | .      | . |
| .            | .            | . | . | . | . | .      | . |
| Vv08g0063    | .            | . | . | . | . | .      | . |
| .            | .            | . | . | . | . | .      | . |
| .            | .            | . | . | . | . | .      | . |
| Vv08g0064    | .            | . | . | . | . | .      | . |
| .            | .            | . | . | . | . | .      | . |
| .            | .            | . | . | . | . | .      | . |
| Vv08g0065    | .            | . | . | . | . | .      | . |
| .            | .            | . | . | . | . | .      | . |

|           |              |   |   |   |   |           |   |
|-----------|--------------|---|---|---|---|-----------|---|
| Vv08g0066 | .            | . | . | . | . | .         | . |
| .         | .            | . | . | . | . | .         | . |
| Vv08g0067 | .            | . | . | . | . | .         | . |
| .         | .            | . | . | . | . | .         | . |
| Vv08g0068 | .            | . | . | . | . | .         | . |
| .         | .            | . | . | . | . | .         | . |
| Vv08g0069 | .            | . | . | . | . | .         | . |
| .         | .            | . | . | . | . | .         | . |
| Vv08g0070 | .            | . | . | . | . | .         | . |
| .         | .            | . | . | . | . | .         | . |
| Vv08g0071 | Tc05_g023120 | . | . | . | . | .         | . |
| .         | .            | . | . | . | . | .         | . |
| Vv08g0072 | Tc05_g023130 | . | . | . | . | .         | . |
| .         | .            | . | . | . | . | .         | . |
| Vv08g0073 | Tc05_g023140 | . | . | . | . | .         | . |
| .         | .            | . | . | . | . | .         | . |
| Vv08g0074 | .            | . | . | . | . | .         | . |
| .         | .            | . | . | . | . | .         | . |
| Vv08g0075 | Tc05_g023150 | . | . | . | . | .         | . |
| .         | .            | . | . | . | . | .         | . |
| Vv08g0076 | .            | . | . | . | . | Vv11g1069 | . |
| .         | .            | . | . | . | . | .         | . |
| Vv08g0077 | .            | . | . | . | . | .         | . |
| .         | .            | . | . | . | . | .         | . |
| Vv08g0078 | .            | . | . | . | . | .         | . |
| .         | .            | . | . | . | . | .         | . |
| Vv08g0079 | Tc05_g023160 | . | . | . | . | .         | . |
| .         | .            | . | . | . | . | .         | . |
| Vv08g0080 | .            | . | . | . | . | .         | . |
| .         | .            | . | . | . | . | .         | . |
| Vv08g0081 | .            | . | . | . | . | .         | . |
| .         | .            | . | . | . | . | .         | . |
| Vv08g0082 | .            | . | . | . | . | .         | . |



|           |              |                    |                    |   |   |   |   |
|-----------|--------------|--------------------|--------------------|---|---|---|---|
| Vv08g0099 | .            | .                  | .                  | . | . | . | . |
| .         | .            | .                  | .                  | . | . | . | . |
| Vv08g0100 | .            | .                  | .                  | . | . | . | . |
| .         | .            | .                  | .                  | . | . | . | . |
| Vv08g0101 | .            | .                  | .                  | . | . | . | . |
| .         | .            | .                  | .                  | . | . | . | . |
| Vv08g0102 | .            | .                  | .                  | . | . | . | . |
| .         | .            | .                  | .                  | . | . | . | . |
| Vv08g0103 | .            | .                  | .                  | . | . | . | . |
| Vv12g0499 | .            | .                  | .                  | . | . | . | . |
| Vv11g1076 | Tc09_g016660 |                    | Gorai.013G246100.1 | . | . | . | . |
| .         | .            | .                  | .                  | . | . | . | . |
| Vv08g0104 | .            | .                  | .                  | . | . | . | . |
| Vv12g0501 | .            | .                  | .                  | . | . | . | . |
| Vv11g1077 | .            | .                  | .                  | . | . | . | . |
| Vv08g0105 | .            | .                  | .                  | . | . | . | . |
| .         | .            | .                  | .                  | . | . | . | . |
| Vv08g0106 | .            | .                  | .                  | . | . | . | . |
| Vv12g0503 | .            | .                  | .                  | . | . | . | . |
| .         | .            | .                  | .                  | . | . | . | . |
| Vv08g0107 | .            | .                  | .                  | . | . | . | . |
| .         | .            | .                  | .                  | . | . | . | . |
| Vv08g0108 | .            | .                  | .                  | . | . | . | . |
| .         | .            | .                  | .                  | . | . | . | . |
| Vv08g0109 | Tc05_g023450 | .                  | .                  | . | . | . | . |
| .         | .            | .                  | .                  | . | . | . | . |
| Vv08g0110 | Tc05_g023460 | .                  | .                  | . | . | . | . |
| .         | .            | .                  | .                  | . | . | . | . |
| Vv08g0111 | Tc05_g023470 | Gorai.013G113200.1 | .                  | . | . | . | . |
| .         | .            | .                  | .                  | . | . | . | . |
| Vv08g0112 | .            | .                  | .                  | . | . | . | . |
| .         | .            | .                  | .                  | . | . | . | . |
| Vv08g0113 | .            | .                  | .                  | . | . | . | . |
| .         | .            | .                  | .                  | . | . | . | . |
| Vv08g0114 | .            | .                  | .                  | . | . | . | . |
| .         | .            | .                  | .                  | . | . | . | . |
| .         | .            | .                  | .                  | . | . | . | . |

|           |              |                    |   |   |   |   |   |
|-----------|--------------|--------------------|---|---|---|---|---|
| Vv08g0115 | .            | .                  | . | . | . | . | . |
| .         | .            | .                  | . | . | . | . | . |
| Vv08g0116 | .            | .                  | . | . | . | . | . |
| .         | .            | .                  | . | . | . | . | . |
| Vv08g0117 | .            | .                  | . | . | . | . | . |
| .         | .            | .                  | . | . | . | . | . |
| Vv08g0118 | Tc05_g004730 | .                  | . | . | . | . | . |
| .         | .            | .                  | . | . | . | . | . |
| Vv08g0119 | .            | .                  | . | . | . | . | . |
| .         | .            | .                  | . | . | . | . | . |
| Vv08g0120 | .            | .                  | . | . | . | . | . |
| .         | .            | .                  | . | . | . | . | . |
| Vv08g0121 | .            | .                  | . | . | . | . | . |
| .         | .            | .                  | . | . | . | . | . |
| Vv08g0122 | .            | .                  | . | . | . | . | . |
| .         | .            | .                  | . | . | . | . | . |
| Vv08g0123 | .            | .                  | . | . | . | . | . |
| .         | .            | .                  | . | . | . | . | . |
| Vv08g0124 | .            | .                  | . | . | . | . | . |
| .         | .            | .                  | . | . | . | . | . |
| Vv08g0125 | Tc05_g023600 | .                  | . | . | . | . | . |
| .         | .            | .                  | . | . | . | . | . |
| Vv08g0126 | .            | .                  | . | . | . | . | . |
| .         | .            | .                  | . | . | . | . | . |
| Vv08g0127 | Tc05_g023650 | .                  | . | . | . | . | . |
| .         | .            | .                  | . | . | . | . | . |
| Vv08g0128 | Tc05_g023660 | .                  | . | . | . | . | . |
| .         | .            | .                  | . | . | . | . | . |
| Vv08g0129 | Tc05_g023670 | .                  | . | . | . | . | . |
| .         | .            | .                  | . | . | . | . | . |
| Vv08g0130 | .            | .                  | . | . | . | . | . |
| .         | .            | .                  | . | . | . | . | . |
| Vv08g0131 | Tc05_g023680 | Gorai.013G113400.1 | . | . | . | . | . |
| .         | .            | .                  | . | . | . | . | . |

|           |              |                    |  |                    |                    |  |  |
|-----------|--------------|--------------------|--|--------------------|--------------------|--|--|
| Vv08g0132 |              |                    |  |                    |                    |  |  |
| Vv08g0133 | Tc05_g023700 |                    |  |                    |                    |  |  |
| Vv08g0134 |              |                    |  |                    |                    |  |  |
| Vv08g0135 |              |                    |  |                    |                    |  |  |
| Vv08g0136 | Tc05_g018910 |                    |  |                    |                    |  |  |
| Vv08g0137 |              |                    |  |                    |                    |  |  |
| Vv06g1089 |              |                    |  |                    |                    |  |  |
| Vv08g0138 |              |                    |  |                    |                    |  |  |
| Vv08g0139 |              |                    |  |                    |                    |  |  |
| Vv08g0140 |              |                    |  |                    |                    |  |  |
| Vv08g0141 |              |                    |  |                    |                    |  |  |
| Vv08g0142 |              |                    |  |                    |                    |  |  |
| Vv08g0143 | Tc05_g004750 |                    |  |                    |                    |  |  |
| Vv01g0465 |              | Gorai.002G180500.1 |  |                    | Gorai.005G162900.1 |  |  |
| Vv08g0144 |              |                    |  |                    |                    |  |  |
| Vv08g0145 |              |                    |  |                    |                    |  |  |
| Vv08g0146 |              |                    |  |                    |                    |  |  |
| Vv08g0147 |              |                    |  |                    |                    |  |  |
| Vv06g1087 | Tc09_g026980 |                    |  | Gorai.001G128200.1 |                    |  |  |

|           |              |   |   |   |   |   |   |
|-----------|--------------|---|---|---|---|---|---|
| Vv08g0148 | .            | . | . | . | . | . | . |
| .         | .            | . | . | . | . | . | . |
| Vv08g0149 | .            | . | . | . | . | . | . |
| .         | .            | . | . | . | . | . | . |
| Vv08g0150 | .            | . | . | . | . | . | . |
| .         | .            | . | . | . | . | . | . |
| Vv08g0151 | .            | . | . | . | . | . | . |
| .         | .            | . | . | . | . | . | . |
| Vv08g0152 | Tc05_g023710 | . | . | . | . | . | . |
| .         | .            | . | . | . | . | . | . |
| Vv08g0153 | .            | . | . | . | . | . | . |
| .         | .            | . | . | . | . | . | . |
| Vv08g0154 | .            | . | . | . | . | . | . |
| .         | .            | . | . | . | . | . | . |
| Vv08g0155 | .            | . | . | . | . | . | . |
| .         | .            | . | . | . | . | . | . |
| Vv08g0156 | .            | . | . | . | . | . | . |
| .         | .            | . | . | . | . | . | . |
| Vv08g0157 | .            | . | . | . | . | . | . |
| .         | .            | . | . | . | . | . | . |
| Vv08g0158 | .            | . | . | . | . | . | . |
| .         | .            | . | . | . | . | . | . |
| Vv08g0159 | .            | . | . | . | . | . | . |
| Vv06g1081 | .            | . | . | . | . | . | . |
| .         | .            | . | . | . | . | . | . |
| Vv08g0160 | .            | . | . | . | . | . | . |
| .         | .            | . | . | . | . | . | . |
| Vv08g0161 | .            | . | . | . | . | . | . |
| .         | .            | . | . | . | . | . | . |
| Vv08g0162 | .            | . | . | . | . | . | . |
| .         | .            | . | . | . | . | . | . |
| Vv08g0163 | .            | . | . | . | . | . | . |
| .         | .            | . | . | . | . | . | . |
| Vv08g0164 | .            | . | . | . | . | . | . |



|                    |              |   |   |   |   |   |   |
|--------------------|--------------|---|---|---|---|---|---|
| .                  | .            | . | . | . | . | . | . |
| Vv08g0165          | .            | . | . | . | . | . | . |
| Vv08g0166          | .            | . | . | . | . | . | . |
| Vv08g0167          | Tc05_g005040 | . | . | . | . | . | . |
| Vv06g1074          | .            | . | . | . | . | . | . |
| Gorai.006G146700.1 | .            | . | . | . | . | . | . |
| Vv08g0168          | .            | . | . | . | . | . | . |
| Vv08g0169          | .            | . | . | . | . | . | . |
| Vv08g0170          | .            | . | . | . | . | . | . |
| Vv08g0171          | .            | . | . | . | . | . | . |
| Vv08g0172          | .            | . | . | . | . | . | . |
| Vv08g0173          | Tc05_g018650 | . | . | . | . | . | . |
| Vv08g0174          | .            | . | . | . | . | . | . |
| Vv08g0175          | .            | . | . | . | . | . | . |
| Vv08g0176          | .            | . | . | . | . | . | . |
| Vv08g0177          | .            | . | . | . | . | . | . |
| Vv06g1061          | .            | . | . | . | . | . | . |
| Vv08g0178          | .            | . | . | . | . | . | . |
| Vv08g0179          | .            | . | . | . | . | . | . |
| Vv08g0180          | .            | . | . | . | . | . | . |

|           |              |   |   |                    |   |   |   |
|-----------|--------------|---|---|--------------------|---|---|---|
| Vv08g0181 | .            | . | . | .                  | . | . | . |
| .         | .            | . | . | .                  | . | . | . |
| Vv08g0182 | .            | . | . | .                  | . | . | . |
| .         | .            | . | . | .                  | . | . | . |
| Vv08g0183 | .            | . | . | .                  | . | . | . |
| .         | .            | . | . | .                  | . | . | . |
| Vv08g0184 | .            | . | . | .                  | . | . | . |
| .         | .            | . | . | .                  | . | . | . |
| Vv08g0185 | .            | . | . | .                  | . | . | . |
| .         | .            | . | . | .                  | . | . | . |
| Vv08g0186 | Tc05_g018260 | . | . | Gorai.002G228800.1 | . | . | . |
| .         | .            | . | . | .                  | . | . | . |
| Vv08g0187 | .            | . | . | .                  | . | . | . |
| .         | .            | . | . | .                  | . | . | . |
| Vv08g0188 | .            | . | . | .                  | . | . | . |
| .         | .            | . | . | .                  | . | . | . |
| Vv08g0189 | .            | . | . | .                  | . | . | . |
| .         | .            | . | . | .                  | . | . | . |
| Vv08g0190 | Tc05_g023730 | . | . | .                  | . | . | . |
| .         | .            | . | . | .                  | . | . | . |
| Vv08g0191 | .            | . | . | .                  | . | . | . |
| .         | .            | . | . | .                  | . | . | . |
| Vv08g0192 | .            | . | . | .                  | . | . | . |
| .         | .            | . | . | .                  | . | . | . |
| Vv08g0193 | .            | . | . | .                  | . | . | . |
| .         | .            | . | . | .                  | . | . | . |
| Vv08g0194 | Tc05_g023980 | . | . | .                  | . | . | . |
| .         | .            | . | . | .                  | . | . | . |
| Vv08g0195 | .            | . | . | .                  | . | . | . |
| .         | .            | . | . | .                  | . | . | . |
| Vv08g0196 | .            | . | . | .                  | . | . | . |
| .         | .            | . | . | .                  | . | . | . |
| Vv08g0197 | .            | . | . | .                  | . | . | . |

|           |              |                    |   |   |
|-----------|--------------|--------------------|---|---|
| Vv08g0198 | Tc05_g020190 | Gorai.006G146100.1 | . | . |
| Vv08g0199 | .            | .                  | . | . |
| Vv08g0200 | .            | .                  | . | . |
| Vv08g0201 | .            | .                  | . | . |
| Vv08g0202 | .            | .                  | . | . |
| Vv08g0203 | .            | .                  | . | . |
| Vv08g0204 | .            | .                  | . | . |
| Vv08g0205 | .            | .                  | . | . |
| Vv08g0206 | .            | .                  | . | . |
| Vv08g0207 | .            | .                  | . | . |
| Vv08g0208 | .            | .                  | . | . |
| Vv08g0209 | .            | .                  | . | . |
| Vv08g0210 | Tc05_g024040 | .                  | . | . |
| Vv06g1046 | Tc09_g030330 | .                  | . | . |
| Vv08g0211 | Tc05_g024050 | .                  | . | . |
| Vv06g1045 | Tc09_g030320 | .                  | . | . |
| Vv08g0212 | .            | .                  | . | . |
| Vv08g0213 | .            | .                  | . | . |

|           |              |   |                    |   |   |   |   |
|-----------|--------------|---|--------------------|---|---|---|---|
| Vv08g0214 | .            | . | .                  | . | . | . | . |
| .         | .            | . | .                  | . | . | . | . |
| Vv08g0215 | .            | . | .                  | . | . | . | . |
| .         | .            | . | .                  | . | . | . | . |
| Vv08g0216 | .            | . | .                  | . | . | . | . |
| .         | .            | . | .                  | . | . | . | . |
| Vv08g0217 | .            | . | .                  | . | . | . | . |
| .         | .            | . | .                  | . | . | . | . |
| Vv08g0218 | Tc05_g020180 | . | Gorai.006G146200.1 | . | . | . | . |
| .         | .            | . | .                  | . | . | . | . |
| Vv08g0219 | .            | . | .                  | . | . | . | . |
| .         | .            | . | .                  | . | . | . | . |
| Vv08g0220 | .            | . | .                  | . | . | . | . |
| .         | .            | . | .                  | . | . | . | . |
| Vv08g0221 | Tc05_g020150 | . | Gorai.006G146300.1 | . | . | . | . |
| .         | .            | . | .                  | . | . | . | . |
| Vv08g0222 | .            | . | .                  | . | . | . | . |
| .         | .            | . | .                  | . | . | . | . |
| Vv08g0223 | Tc05_g020130 | . | Gorai.002G232700.1 | . | . | . | . |
| .         | .            | . | .                  | . | . | . | . |
| Vv08g0224 | .            | . | .                  | . | . | . | . |
| .         | .            | . | .                  | . | . | . | . |
| Vv08g0225 | .            | . | .                  | . | . | . | . |
| .         | .            | . | .                  | . | . | . | . |
| Vv08g0226 | .            | . | .                  | . | . | . | . |
| .         | .            | . | .                  | . | . | . | . |
| Vv08g0227 | .            | . | .                  | . | . | . | . |
| .         | .            | . | .                  | . | . | . | . |
| Vv08g0228 | .            | . | Gorai.002G232900.1 | . | . | . | . |
| .         | .            | . | .                  | . | . | . | . |
| Vv08g0229 | .            | . | .                  | . | . | . | . |
| .         | .            | . | .                  | . | . | . | . |
| Vv08g0230 | Tc05_g020110 | . | .                  | . | . | . | . |
| .         | .            | . | .                  | . | . | . | . |

|              |              |   |                    |   |        |   |   |
|--------------|--------------|---|--------------------|---|--------|---|---|
| Vv08g0231    | .            | . | .                  | . | .      | . | . |
| .            | .            | . | .                  | . | .      | . | . |
| Vv08g0232    | .            | . | .                  | . | .      | . | . |
| .            | .            | . | .                  | . | .      | . | . |
| Vv08g0233    | .            | . | .                  | . | .      | . | . |
| .            | .            | . | .                  | . | .      | . | . |
| Vv08g0234    | .            | . | .                  | . | .      | . | . |
| .            | .            | . | .                  | . | .      | . | . |
| Vv08g0235    | .            | . | .                  | . | .      | . | . |
| .            | .            | . | .                  | . | .      | . | . |
| Vv08g0236    | Tc05_g020050 | . | Gorai.006G146700.1 | . | .      | . | . |
| .            | .            | . | .                  | . | .      | . | . |
| Vv08g0237    | .            | . | .                  | . | .      | . | . |
| .            | .            | . | .                  | . | .      | . | . |
| Vv08g0238    | .            | . | .                  | . | .      | . | . |
| .            | .            | . | .                  | . | .      | . | . |
| Vv08g0239    | Tc05_g020010 | . | Gorai.006G146900.1 | . | Gorai. | . | . |
| 002G233200.1 | .            | . | .                  | . | .      | . | . |
| .            | .            | . | .                  | . | .      | . | . |
| Vv08g0240    | .            | . | .                  | . | .      | . | . |
| .            | .            | . | .                  | . | .      | . | . |
| Vv08g0241    | Tc05_g020000 | . | .                  | . | .      | . | . |
| .            | .            | . | .                  | . | .      | . | . |
| Vv08g0242    | Tc05_g019980 | . | .                  | . | .      | . | . |
| .            | .            | . | .                  | . | .      | . | . |
| Vv08g0243    | .            | . | .                  | . | .      | . | . |
| .            | .            | . | .                  | . | .      | . | . |
| Vv08g0244    | .            | . | .                  | . | .      | . | . |
| .            | .            | . | .                  | . | .      | . | . |
| Vv08g0245    | .            | . | .                  | . | .      | . | . |
| .            | .            | . | .                  | . | .      | . | . |
| Vv08g0246    | .            | . | .                  | . | .      | . | . |
| .            | .            | . | .                  | . | .      | . | . |
| .            | .            | . | .                  | . | .      | . | . |

|           |              |   |   |   |   |   |   |
|-----------|--------------|---|---|---|---|---|---|
| Vv08g0247 | .            | . | . | . | . | . | . |
| .         | .            | . | . | . | . | . | . |
| Vv08g0248 | Tc05_g019540 | . | . | . | . | . | . |
| .         | .            | . | . | . | . | . | . |
| Vv08g0249 | .            | . | . | . | . | . | . |
| .         | .            | . | . | . | . | . | . |
| Vv08g0250 | .            | . | . | . | . | . | . |
| .         | .            | . | . | . | . | . | . |
| Vv08g0251 | .            | . | . | . | . | . | . |
| .         | .            | . | . | . | . | . | . |
| Vv08g0252 | .            | . | . | . | . | . | . |
| .         | .            | . | . | . | . | . | . |
| Vv08g0253 | .            | . | . | . | . | . | . |
| .         | .            | . | . | . | . | . | . |
| Vv08g0254 | .            | . | . | . | . | . | . |
| .         | .            | . | . | . | . | . | . |
| Vv08g0255 | .            | . | . | . | . | . | . |
| .         | .            | . | . | . | . | . | . |
| Vv08g0256 | .            | . | . | . | . | . | . |
| .         | .            | . | . | . | . | . | . |
| Vv08g0257 | .            | . | . | . | . | . | . |
| .         | .            | . | . | . | . | . | . |
| Vv08g0258 | .            | . | . | . | . | . | . |
| .         | .            | . | . | . | . | . | . |
| Vv08g0259 | .            | . | . | . | . | . | . |
| .         | .            | . | . | . | . | . | . |
| Vv08g0260 | .            | . | . | . | . | . | . |
| .         | .            | . | . | . | . | . | . |
| Vv08g0261 | .            | . | . | . | . | . | . |
| .         | .            | . | . | . | . | . | . |
| Vv08g0262 | .            | . | . | . | . | . | . |
| .         | .            | . | . | . | . | . | . |
| Vv08g0263 | .            | . | . | . | . | . | . |
| .         | .            | . | . | . | . | . | . |

|           |              |   |                    |   |   |   |   |
|-----------|--------------|---|--------------------|---|---|---|---|
| Vv08g0264 | .            | . | .                  | . | . | . | . |
| .         | .            | . | .                  | . | . | . | . |
| Vv08g0265 | .            | . | Gorai.006G147400.1 | . | . | . | . |
| .         | .            | . | .                  | . | . | . | . |
| Vv08g0266 | .            | . | Gorai.006G147500.1 | . | . | . | . |
| .         | .            | . | .                  | . | . | . | . |
| Vv08g0267 | .            | . | .                  | . | . | . | . |
| .         | .            | . | .                  | . | . | . | . |
| Vv08g0268 | Tc05_g019360 | . | .                  | . | . | . | . |
| .         | .            | . | .                  | . | . | . | . |
| Vv08g0269 | .            | . | .                  | . | . | . | . |
| .         | .            | . | .                  | . | . | . | . |
| Vv08g0270 | .            | . | .                  | . | . | . | . |
| .         | .            | . | .                  | . | . | . | . |
| Vv08g0271 | .            | . | .                  | . | . | . | . |
| .         | .            | . | .                  | . | . | . | . |
| Vv08g0272 | .            | . | .                  | . | . | . | . |
| .         | .            | . | .                  | . | . | . | . |
| Vv08g0273 | .            | . | .                  | . | . | . | . |
| .         | .            | . | .                  | . | . | . | . |
| Vv08g0274 | .            | . | .                  | . | . | . | . |
| .         | .            | . | .                  | . | . | . | . |
| Vv08g0275 | .            | . | .                  | . | . | . | . |
| .         | .            | . | .                  | . | . | . | . |
| Vv08g0276 | .            | . | .                  | . | . | . | . |
| .         | .            | . | .                  | . | . | . | . |
| Vv08g0277 | .            | . | Gorai.002G233900.1 | . | . | . | . |
| .         | .            | . | .                  | . | . | . | . |
| Vv08g0278 | .            | . | .                  | . | . | . | . |
| .         | .            | . | .                  | . | . | . | . |
| Vv08g0279 | .            | . | .                  | . | . | . | . |
| .         | .            | . | .                  | . | . | . | . |
| Vv08g0280 | Tc05_g017170 | . | .                  | . | . | . | . |

|           |              |  |                    |  |  |  |  |
|-----------|--------------|--|--------------------|--|--|--|--|
| Vv08g0281 |              |  |                    |  |  |  |  |
| Vv08g0282 |              |  |                    |  |  |  |  |
| Vv08g0283 |              |  |                    |  |  |  |  |
| Vv08g0284 |              |  |                    |  |  |  |  |
| Vv08g0285 |              |  |                    |  |  |  |  |
| Vv08g0286 |              |  | Gorai.002G234200.1 |  |  |  |  |
| Vv08g0287 |              |  |                    |  |  |  |  |
| Vv08g0288 |              |  |                    |  |  |  |  |
| Vv08g0289 |              |  |                    |  |  |  |  |
| Vv08g0290 |              |  |                    |  |  |  |  |
| Vv08g0291 |              |  |                    |  |  |  |  |
| Vv08g0292 |              |  |                    |  |  |  |  |
| Vv08g0293 |              |  |                    |  |  |  |  |
| Vv08g0294 |              |  |                    |  |  |  |  |
| Vv08g0295 | Tc05_g017210 |  |                    |  |  |  |  |
| Vv08g0296 |              |  |                    |  |  |  |  |



|           |   |                    |   |   |   |   |   |
|-----------|---|--------------------|---|---|---|---|---|
| Vv08g0297 | . | .                  | . | . | . | . | . |
| .         | . | .                  | . | . | . | . | . |
| Vv08g0298 | . | Gorai.006G147900.1 | . | . | . | . | . |
| .         | . | .                  | . | . | . | . | . |
| Vv08g0299 | . | .                  | . | . | . | . | . |
| .         | . | .                  | . | . | . | . | . |
| Vv08g0300 | . | .                  | . | . | . | . | . |
| .         | . | .                  | . | . | . | . | . |
| Vv08g0301 | . | .                  | . | . | . | . | . |
| .         | . | .                  | . | . | . | . | . |
| Vv08g0302 | . | .                  | . | . | . | . | . |
| .         | . | .                  | . | . | . | . | . |
| Vv08g0303 | . | .                  | . | . | . | . | . |
| .         | . | .                  | . | . | . | . | . |
| Vv08g0304 | . | .                  | . | . | . | . | . |
| .         | . | .                  | . | . | . | . | . |
| Vv08g0305 | . | .                  | . | . | . | . | . |
| .         | . | .                  | . | . | . | . | . |
| Vv08g0306 | . | .                  | . | . | . | . | . |
| .         | . | .                  | . | . | . | . | . |
| Vv08g0307 | . | .                  | . | . | . | . | . |
| .         | . | .                  | . | . | . | . | . |
| Vv08g0308 | . | .                  | . | . | . | . | . |
| .         | . | .                  | . | . | . | . | . |
| Vv08g0309 | . | .                  | . | . | . | . | . |
| .         | . | .                  | . | . | . | . | . |
| Vv08g0310 | . | .                  | . | . | . | . | . |
| .         | . | .                  | . | . | . | . | . |
| Vv08g0311 | . | .                  | . | . | . | . | . |
| .         | . | .                  | . | . | . | . | . |
| Vv08g0312 | . | .                  | . | . | . | . | . |
| .         | . | .                  | . | . | . | . | . |
| Vv08g0313 | . | .                  | . | . | . | . | . |
| .         | . | .                  | . | . | . | . | . |

|              |              |   |                    |   |        |   |   |
|--------------|--------------|---|--------------------|---|--------|---|---|
| Vv08g0314    | .            | . | .                  | . | .      | . | . |
| .            | .            | . | .                  | . | .      | . | . |
| Vv08g0315    | .            | . | .                  | . | .      | . | . |
| .            | .            | . | .                  | . | .      | . | . |
| Vv08g0316    | .            | . | .                  | . | .      | . | . |
| .            | .            | . | .                  | . | .      | . | . |
| Vv08g0317    | .            | . | .                  | . | .      | . | . |
| .            | .            | . | .                  | . | .      | . | . |
| Vv08g0318    | .            | . | .                  | . | .      | . | . |
| .            | .            | . | .                  | . | .      | . | . |
| Vv08g0319    | .            | . | .                  | . | .      | . | . |
| .            | .            | . | .                  | . | .      | . | . |
| Vv08g0320    | .            | . | .                  | . | .      | . | . |
| .            | .            | . | .                  | . | .      | . | . |
| Vv08g0321    | .            | . | .                  | . | .      | . | . |
| .            | .            | . | .                  | . | .      | . | . |
| Vv08g0322    | .            | . | .                  | . | .      | . | . |
| .            | .            | . | .                  | . | .      | . | . |
| Vv08g0323    | .            | . | .                  | . | .      | . | . |
| .            | .            | . | .                  | . | .      | . | . |
| Vv08g0324    | .            | . | .                  | . | .      | . | . |
| .            | .            | . | .                  | . | .      | . | . |
| Vv08g0325    | .            | . | .                  | . | .      | . | . |
| .            | .            | . | .                  | . | .      | . | . |
| Vv08g0326    | .            | . | .                  | . | .      | . | . |
| .            | .            | . | .                  | . | .      | . | . |
| Vv08g0327    | .            | . | .                  | . | .      | . | . |
| .            | .            | . | .                  | . | .      | . | . |
| Vv08g0328    | .            | . | .                  | . | .      | . | . |
| .            | .            | . | .                  | . | .      | . | . |
| Vv08g0329    | Tc05_g010960 | . | Gorai.006G148800.1 | . | Gorai. | . | . |
| 002G234700.1 | .            | . | .                  | . | .      | . | . |
| .            | .            | . | .                  | . | .      | . | . |
| .            | .            | . | .                  | . | .      | . | . |

|              |                    |                    |                    |                    |   |   |
|--------------|--------------------|--------------------|--------------------|--------------------|---|---|
| Vv08g0330    | Tc05_g010950       | .                  | .                  | .                  | . | . |
| .            | .                  | .                  | .                  | .                  | . | . |
| Vv08g0331    | Tc05_g010920       | Gorai.006G148900.1 | .                  | Gorai.             | . | . |
| 002G234800.1 | .                  | .                  | .                  | .                  | . | . |
| .            | .                  | .                  | .                  | .                  | . | . |
| Vv08g0332    | .                  | .                  | .                  | .                  | . | . |
| .            | .                  | .                  | .                  | .                  | . | . |
| Vv08g0333    | .                  | Gorai.006G149000.1 | .                  | .                  | . | . |
| .            | .                  | .                  | .                  | .                  | . | . |
| Vv08g0334    | Tc05_g010840       | .                  | .                  | .                  | . | . |
| .            | .                  | .                  | .                  | .                  | . | . |
| Vv08g0335    | Tc05_g010830       | Gorai.006G149100.1 | .                  | Gorai.             | . | . |
| 002G234900.1 | .                  | .                  | .                  | .                  | . | . |
| .            | .                  | .                  | .                  | .                  | . | . |
| Vv08g0336    | .                  | .                  | .                  | .                  | . | . |
| .            | .                  | .                  | .                  | .                  | . | . |
| Vv08g0337    | Tc05_g010780       | Gorai.006G149200.1 | .                  | .                  | . | . |
| .            | .                  | .                  | .                  | .                  | . | . |
| Vv08g0338    | .                  | Gorai.002G235100.1 | .                  | .                  | . | . |
| .            | .                  | .                  | .                  | .                  | . | . |
| Vv08g0339    | .                  | .                  | .                  | .                  | . | . |
| .            | .                  | .                  | .                  | .                  | . | . |
| Vv08g0340    | .                  | .                  | .                  | .                  | . | . |
| .            | .                  | .                  | .                  | .                  | . | . |
| Vv08g0341    | .                  | Gorai.006G149300.1 | .                  | .                  | . | . |
| .            | .                  | .                  | .                  | .                  | . | . |
| Vv08g0342    | .                  | Gorai.006G149400.1 | .                  | Gorai.002G235200.1 | . | . |
| .            | .                  | .                  | .                  | .                  | . | . |
| .            | .                  | .                  | .                  | .                  | . | . |
| Vv08g0343    | .                  | .                  | .                  | .                  | . | . |
| .            | .                  | .                  | .                  | .                  | . | . |
| Vv08g0344    | Tc05_g002480       | .                  | Gorai.002G263500.1 | .                  | . | . |
| .            | Vv06g0774          | .                  | Tc09_g029900       | .                  | . | . |
| .            | Gorai.009G092000.1 | .                  | .                  | .                  | . | . |
| .            | .                  | .                  | .                  | .                  | . | . |
| Vv08g0345    | .                  | .                  | .                  | .                  | . | . |

|                    |                    |                    |                    |           |        |   |
|--------------------|--------------------|--------------------|--------------------|-----------|--------|---|
| Vv06g0780          | Tc09_g029870       | .                  | .                  | .         | Gorai. | . |
| 009G091600.1       | .                  | Vv13g0059          | Tc10_g001480       | .         | .      | . |
| Gorai.011G288000.1 | .                  | .                  | Gorai.010G197900.1 | .         | .      | . |
| Vv08g0346          | Tc05_g002460       | .                  | Gorai.006G182700.1 | .         | .      | . |
| .                  | .                  | .                  | .                  | .         | .      | . |
| Vv08g0347          | Tc05_g002450       | .                  | Gorai.002G263300.1 | .         | .      | . |
| .                  | .                  | .                  | .                  | .         | .      | . |
| Vv08g0348          | .                  | .                  | .                  | .         | .      | . |
|                    | Tc10_g001430       | Gorai.013G018000.1 | Gorai.011G288400.1 | Vv13g0062 | .      | . |
| .                  | .                  | .                  | .                  | .         | .      | . |
| Vv08g0349          | Tc05_g002440       | .                  | Gorai.002G263200.1 | .         | .      | . |
| Gorai.012G114200.1 | .                  | .                  | .                  | .         | .      | . |
| .                  | .                  | .                  | .                  | .         | .      | . |
| Vv08g0350          | Tc05_g002430       | .                  | .                  | .         | Gorai. | . |
| 012G114500.1       | .                  | .                  | .                  | .         | .      | . |
| .                  | Vv13g0066          | Tc10_g001400       | Gorai.013G017700.1 | .         | .      | . |
| Gorai.011G289200.1 | .                  | Gorai.010G196600.1 | .                  | .         | .      | . |
| Vv08g0351          | Tc05_g002420       | Gorai.006G182800.1 | .                  | .         | .      | . |
| .                  | .                  | .                  | .                  | .         | .      | . |
| Vv08g0352          | .                  | .                  | .                  | .         | .      | . |
| .                  | .                  | .                  | .                  | .         | .      | . |
| Vv08g0353          | Tc05_g002410       | Gorai.006G182900.1 | Gorai.             | .         | .      | . |
| 002G263100.1       | .                  | .                  | .                  | .         | .      | . |
| .                  | .                  | .                  | .                  | .         | .      | . |
| Vv08g0354          | Tc05_g002380       | .                  | .                  | .         | Gorai. | . |
| 012G114600.1       | .                  | .                  | .                  | .         | .      | . |
| .                  | .                  | .                  | .                  | .         | .      | . |
| Vv08g0355          | Tc05_g002370       | Gorai.006G183000.1 | Gorai.             | .         | .      | . |
| 002G262900.1       | Gorai.012G114700.1 | .                  | .                  | .         | .      | . |
| .                  | .                  | .                  | .                  | .         | .      | . |
| Vv08g0356          | .                  | .                  | .                  | .         | .      | . |
| .                  | .                  | .                  | .                  | .         | .      | . |
| Vv08g0357          | Tc05_g002310       | Gorai.002G262800.1 | .                  | .         | .      | . |
| Gorai.012G115000.1 | .                  | Vv06g0788          | .                  | .         | .      | . |
| Tc09_g029750       | Gorai.001G116500.1 | .                  | .                  | .         | .      | . |
| Gorai.006G106100.1 | Vv13g0073          | Tc10_g001360       | .                  | .         | .      | . |
| Gorai.011G289600.1 | .                  | .                  | .                  | .         | .      | . |
| Vv08g0358          | .                  | .                  | .                  | .         | .      | . |
| .                  | .                  | .                  | .                  | .         | .      | . |
| Vv08g0359          | .                  | .                  | .                  | .         | .      | . |

|                    |                    |                    |                    |   |        |   |
|--------------------|--------------------|--------------------|--------------------|---|--------|---|
| .                  | .                  | .                  | .                  | . | .      | . |
| .                  | .                  | .                  | .                  | . | .      | . |
| Vv08g0360          | Tc05_g002290       | .                  | .                  | . | Gorai. | . |
| 012G115100.1       | .                  | .                  | .                  | . | .      | . |
| .                  | Vv13g0075          | .                  | .                  | . | .      | . |
| .                  | .                  | .                  | .                  | . | .      | . |
| Vv08g0361          | Tc05_g002270       | Gorai.006G183300.1 | .                  | . | .      | . |
| .                  | .                  | .                  | .                  | . | .      | . |
| Vv08g0362          | .                  | .                  | .                  | . | .      | . |
| .                  | .                  | .                  | .                  | . | .      | . |
| Vv08g0363          | .                  | .                  | .                  | . | .      | . |
| .                  | .                  | .                  | .                  | . | .      | . |
| Vv08g0364          | .                  | .                  | .                  | . | .      | . |
| .                  | .                  | .                  | .                  | . | .      | . |
| Vv08g0365          | Tc05_g002250       | .                  | .                  | . | Gorai. | . |
| 012G115300.1       | .                  | .                  | .                  | . | .      | . |
| .                  | .                  | .                  | .                  | . | .      | . |
| Vv08g0366          | Tc05_g002240       | Gorai.006G183400.1 | .                  | . | .      | . |
| .                  | .                  | .                  | .                  | . | .      | . |
| .                  | Vv13g0111          | Tc10_g001070       | Gorai.013G016800.1 | . | .      | . |
| .                  | Gorai.010G195600.1 | .                  | .                  | . | .      | . |
| Vv08g0367          | .                  | .                  | .                  | . | .      | . |
| .                  | .                  | .                  | .                  | . | .      | . |
| .                  | .                  | .                  | .                  | . | .      | . |
| Vv08g0368          | Tc05_g002230       | .                  | .                  | . | Gorai. | . |
| 012G115400.1       | Vv06g0798          | Tc09_g029660       | .                  | . | .      | . |
| Gorai.001G116900.1 | .                  | Gorai.006G105300.1 | .                  | . | .      | . |
| Vv13g0130          | Tc10_g000890       | .                  | .                  | . | Gorai. | . |
| 010G195000.1       | .                  | .                  | .                  | . | .      | . |
| Vv08g0369          | .                  | .                  | .                  | . | .      | . |
| .                  | .                  | .                  | .                  | . | .      | . |
| .                  | .                  | .                  | .                  | . | .      | . |
| Vv08g0370          | .                  | .                  | .                  | . | .      | . |
| .                  | .                  | .                  | .                  | . | .      | . |
| .                  | .                  | .                  | .                  | . | .      | . |
| Vv08g0371          | Tc05_g002210       | .                  | .                  | . | Gorai. | . |
| 012G115600.1       | .                  | .                  | .                  | . | .      | . |
| .                  | .                  | .                  | .                  | . | .      | . |
| Vv08g0372          | Tc05_g002200       | Gorai.006G183500.1 | .                  | . | .      | . |
| Gorai.012G115700.1 | .                  | .                  | .                  | . | .      | . |
| .                  | .                  | .                  | .                  | . | .      | . |
| .                  | .                  | .                  | .                  | . | .      | . |
| Vv08g0373          | .                  | .                  | .                  | . | .      | . |
| .                  | .                  | .                  | .                  | . | .      | . |
| .                  | .                  | .                  | .                  | . | .      | . |
| Vv08g0374          | Tc05_g002170       | .                  | .                  | . | Gorai. | . |

|                    |                    |                    |        |   |   |   |   |
|--------------------|--------------------|--------------------|--------|---|---|---|---|
| 012G116000.1       | .                  | .                  | .      | . | . | . | . |
| Vv08g0375          | .                  | .                  | .      | . | . | . | . |
| Vv08g0376          | .                  | .                  | .      | . | . | . | . |
| Vv08g0377          | .                  | .                  | .      | . | . | . | . |
| Vv08g0378          | .                  | .                  | .      | . | . | . | . |
| Vv08g0379          | .                  | .                  | .      | . | . | . | . |
| Vv08g0380          | .                  | .                  | .      | . | . | . | . |
| Vv08g0381          | Tc05_g002150       | Gorai.006G183700.1 | Gorai. | . | . | . | . |
| 002G262700.1       | .                  | Vv06g0805          | .      | . | . | . | . |
| Vv08g0382          | Tc05_g002140       | Gorai.002G262600.1 | .      | . | . | . | . |
| .                  | Vv06g0806          | Gorai.013G269700.1 | .      | . | . | . | . |
| .                  | Gorai.009G111700.1 | .                  | .      | . | . | . | . |
| Vv08g0383          | Tc05_g002130       | Gorai.002G262500.1 | .      | . | . | . | . |
| Gorai.012G116700.1 | .                  | .                  | .      | . | . | . | . |
| Vv08g0384          | .                  | .                  | .      | . | . | . | . |
| Vv08g0385          | Tc05_g002120       | Gorai.006G183800.1 | .      | . | . | . | . |
| Gorai.002G153200.1 | Gorai.012G116800.1 | .                  | .      | . | . | . | . |
| Vv08g0386          | Tc05_g002100       | Gorai.006G183900.1 | .      | . | . | . | . |
| .                  | Vv06g0808          | .                  | .      | . | . | . | . |
| Vv08g0387          | Tc05_g002080       | .                  | .      | . | . | . | . |
| 012G116900.1       | .                  | .                  | .      | . | . | . | . |
| Vv08g0388          | .                  | .                  | .      | . | . | . | . |
| Vv08g0389          | .                  | .                  | .      | . | . | . | . |

|           |                    |   |                    |   |   |   |   |
|-----------|--------------------|---|--------------------|---|---|---|---|
| .         | .                  | . | .                  | . | . | . | . |
| .         | .                  | . | .                  | . | . | . | . |
| Vv08g0390 | .                  | . | .                  | . | . | . | . |
| .         | .                  | . | .                  | . | . | . | . |
| Vv08g0391 | .                  | . | Gorai.002G259600.1 | . | . | . | . |
| .         | .                  | . | .                  | . | . | . | . |
| Vv08g0392 | .                  | . | .                  | . | . | . | . |
| .         | .                  | . | .                  | . | . | . | . |
| Vv08g0393 | .                  | . | .                  | . | . | . | . |
| .         | .                  | . | .                  | . | . | . | . |
| Vv08g0394 | .                  | . | .                  | . | . | . | . |
| .         | .                  | . | .                  | . | . | . | . |
| Vv08g0395 | .                  | . | .                  | . | . | . | . |
| .         | .                  | . | .                  | . | . | . | . |
| Vv08g0396 | .                  | . | .                  | . | . | . | . |
| .         | .                  | . | .                  | . | . | . | . |
| Vv08g0397 | .                  | . | .                  | . | . | . | . |
| .         | .                  | . | .                  | . | . | . | . |
| Vv08g0398 | .                  | . | .                  | . | . | . | . |
| .         | .                  | . | .                  | . | . | . | . |
| Vv08g0399 | Tc05_g002040       | . | Gorai.002G264400.1 | . | . | . | . |
|           | Gorai.012G117000.1 | . | .                  | . | . | . | . |
| .         | .                  | . | .                  | . | . | . | . |
| Vv08g0400 | Tc05_g002020       | . | Gorai.002G264500.1 | . | . | . | . |
|           | Gorai.012G117100.1 | . | .                  | . | . | . | . |
| .         | .                  | . | .                  | . | . | . | . |
| Vv08g0401 | .                  | . | .                  | . | . | . | . |
| .         | .                  | . | .                  | . | . | . | . |
| Vv08g0402 | .                  | . | .                  | . | . | . | . |
| .         | .                  | . | .                  | . | . | . | . |
| Vv08g0403 | .                  | . | .                  | . | . | . | . |
| .         | .                  | . | .                  | . | . | . | . |
| Vv08g0404 | .                  | . | .                  | . | . | . | . |
| .         | .                  | . | .                  | . | . | . | . |
| Vv08g0405 | .                  | . | .                  | . | . | . | . |

|              |                    |                    |                    |   |        |   |   |
|--------------|--------------------|--------------------|--------------------|---|--------|---|---|
| .            | .                  | .                  | .                  | . | .      | . | . |
| .            | .                  | .                  | .                  | . | .      | . | . |
| Vv08g0406    | .                  | .                  | .                  | . | .      | . | . |
| .            | .                  | .                  | .                  | . | .      | . | . |
| Vv08g0407    | .                  | .                  | .                  | . | .      | . | . |
| .            | .                  | .                  | .                  | . | .      | . | . |
| Vv08g0408    | .                  | .                  | .                  | . | .      | . | . |
| .            | .                  | .                  | .                  | . | .      | . | . |
| Vv08g0409    | .                  | .                  | .                  | . | .      | . | . |
| .            | .                  | .                  | .                  | . | .      | . | . |
| Vv08g0410    | .                  | .                  | .                  | . | .      | . | . |
| .            | .                  | .                  | .                  | . | .      | . | . |
| Vv08g0411    | Tc05_g001990       | .                  | Gorai.002G264600.1 | . | .      | . | . |
|              | Gorai.012G117200.1 | .                  | .                  | . | .      | . | . |
| .            | .                  | .                  | .                  | . | .      | . | . |
| Vv08g0412    | .                  | .                  | .                  | . | .      | . | . |
| .            | .                  | .                  | .                  | . | .      | . | . |
| Vv08g0413    | .                  | .                  | .                  | . | .      | . | . |
| .            | .                  | .                  | .                  | . | .      | . | . |
| Vv08g0414    | .                  | .                  | .                  | . | .      | . | . |
| .            | .                  | .                  | .                  | . | .      | . | . |
| Vv08g0415    | .                  | .                  | .                  | . | .      | . | . |
| .            | .                  | .                  | .                  | . | .      | . | . |
| Vv08g0416    | Tc05_g001980       | .                  | .                  | . | Gorai. | . | . |
| 012G117300.1 | .                  | .                  | .                  | . | .      | . | . |
| .            | .                  | .                  | .                  | . | .      | . | . |
| Vv08g0417    | Tc05_g001970       | .                  | Gorai.002G264900.1 | . | .      | . | . |
|              | Gorai.012G117400.1 | .                  | .                  | . | .      | . | . |
| .            | .                  | .                  | .                  | . | .      | . | . |
| Vv08g0418    | Tc05_g001960       | Gorai.006G184200.1 | Gorai.             | . | .      | . | . |
| 002G265100.1 | Gorai.012G117500.1 | .                  | Vv06g0815          | . | .      | . | . |
| .            | .                  | Gorai.009G111900.1 | .                  | . | .      | . | . |
| .            | .                  | .                  | .                  | . | .      | . | . |
| Vv08g0419    | Tc05_g001950       | .                  | .                  | . | .      | . | . |
| .            | .                  | .                  | .                  | . | .      | . | . |
| Vv08g0420    | .                  | .                  | .                  | . | .      | . | . |
| .            | .                  | .                  | .                  | . | .      | . | . |
| .            | .                  | .                  | .                  | . | .      | . | . |



|                    |                    |                    |                    |           |   |
|--------------------|--------------------|--------------------|--------------------|-----------|---|
| Vv08g0421          | .                  | .                  | Gorai.002G265200.1 | .         | . |
| Gorai.012G117600.1 | .                  | .                  | .                  | .         | . |
| .                  | .                  | .                  | .                  | .         | . |
| Vv08g0422          | .                  | .                  | .                  | .         | . |
| .                  | .                  | .                  | .                  | .         | . |
| Vv08g0423          | Tc05_g001940       | .                  | .                  | .         | . |
| .                  | .                  | .                  | .                  | .         | . |
| Vv08g0424          | .                  | .                  | .                  | .         | . |
| .                  | .                  | .                  | .                  | .         | . |
| Vv08g0425          | .                  | .                  | .                  | .         | . |
| .                  | .                  | .                  | .                  | .         | . |
| Vv08g0426          | .                  | .                  | .                  | .         | . |
| .                  | .                  | .                  | .                  | .         | . |
| Vv08g0427          | .                  | .                  | .                  | .         | . |
| .                  | .                  | .                  | .                  | .         | . |
| Vv08g0428          | .                  | .                  | .                  | .         | . |
| .                  | .                  | .                  | .                  | .         | . |
| Vv08g0429          | .                  | .                  | .                  | .         | . |
| .                  | .                  | .                  | .                  | .         | . |
| Vv08g0430          | .                  | .                  | .                  | .         | . |
| .                  | .                  | .                  | .                  | .         | . |
| Vv08g0431          | .                  | .                  | .                  | .         | . |
| .                  | .                  | .                  | .                  | .         | . |
| Vv08g0432          | .                  | .                  | .                  | .         | . |
| .                  | .                  | .                  | .                  | .         | . |
| Vv08g0433          | .                  | .                  | .                  | .         | . |
| .                  | .                  | .                  | .                  | .         | . |
| Vv08g0434          | .                  | .                  | .                  | .         | . |
| .                  | .                  | .                  | .                  | .         | . |
| Vv08g0435          | Tc05_g001910       | .                  | Gorai.002G265400.1 | .         | . |
| Gorai.012G117800.1 | .                  | .                  | Vv06g0821          | .         | . |
| .                  | Gorai.009G112300.1 | .                  | .                  | Vv13g0101 | . |
| Tc10_g001130       | .                  | .                  | .                  | .         | . |
| Vv08g0436          | Tc05_g001900       | .                  | Gorai.002G265500.1 | .         | . |
| .                  | Vv06g0823          | .                  | Gorai.013G270200.1 | .         | . |
| .                  | .                  | Gorai.003G147900.1 | .                  | .         | . |

|                    |              |                    |   |   |   |        |   |
|--------------------|--------------|--------------------|---|---|---|--------|---|
| Vv08g0437          | .            | .                  | . | . | . | .      | . |
| .                  | .            | .                  | . | . | . | .      | . |
| Vv08g0438          | Tc05_g001880 | .                  | . | . | . | Gorai. | . |
| 012G117900.1       | .            | .                  | . | . | . | .      | . |
| Vv08g0439          | .            | .                  | . | . | . | .      | . |
| .                  | .            | .                  | . | . | . | .      | . |
| Vv08g0440          | Tc05_g001870 | Gorai.006G184300.1 | . | . | . | .      | . |
| .                  | .            | .                  | . | . | . | .      | . |
| Vv08g0441          | .            | .                  | . | . | . | .      | . |
| .                  | .            | .                  | . | . | . | .      | . |
| Vv08g0442          | .            | .                  | . | . | . | .      | . |
| .                  | .            | .                  | . | . | . | .      | . |
| Vv08g0443          | .            | .                  | . | . | . | .      | . |
| .                  | .            | .                  | . | . | . | .      | . |
| Vv08g0444          | Tc05_g001860 | .                  | . | . | . | .      | . |
| .                  | .            | .                  | . | . | . | .      | . |
| Vv08g0445          | .            | Gorai.006G184400.1 | . | . | . | .      | . |
| Gorai.012G118000.1 | .            | .                  | . | . | . | .      | . |
| .                  | .            | .                  | . | . | . | .      | . |
| Vv08g0446          | .            | .                  | . | . | . | .      | . |
| .                  | .            | .                  | . | . | . | .      | . |
| Vv08g0447          | Tc05_g001850 | .                  | . | . | . | .      | . |
| .                  | .            | .                  | . | . | . | .      | . |
| Vv08g0448          | .            | .                  | . | . | . | .      | . |
| Vv06g0826          | .            | Gorai.013G270400.1 | . | . | . | .      | . |
| Gorai.003G148200.1 | .            | .                  | . | . | . | .      | . |
| Vv08g0449          | .            | .                  | . | . | . | .      | . |
| .                  | .            | .                  | . | . | . | .      | . |
| Vv08g0450          | Tc05_g001840 | Gorai.002G265700.1 | . | . | . | .      | . |
| .                  | .            | .                  | . | . | . | .      | . |
| Vv08g0451          | .            | .                  | . | . | . | .      | . |
| .                  | .            | .                  | . | . | . | .      | . |
| Vv08g0452          | Tc05_g001810 | Gorai.006G184500.1 | . | . | . | .      | . |
| Gorai.012G118200.1 | .            | Vv06g0833          | . | . | . | .      | . |

|                    |                    |                    |                    |           |   |   |   |
|--------------------|--------------------|--------------------|--------------------|-----------|---|---|---|
| .                  | .                  | .                  | .                  | .         | . | . | . |
| .                  | .                  | .                  | .                  | .         | . | . | . |
| Vv08g0453          | .                  | .                  | .                  | .         | . | . | . |
| .                  | .                  | .                  | .                  | .         | . | . | . |
| Vv08g0454          | Tc05_g001790       | .                  | Gorai.002G265900.1 | .         | . | . | . |
|                    | Gorai.012G118300.1 | .                  | .                  | .         | . | . | . |
| .                  | .                  | .                  | .                  | .         | . | . | . |
| Vv08g0455          | .                  | .                  | .                  | .         | . | . | . |
| .                  | .                  | .                  | .                  | .         | . | . | . |
| Vv08g0456          | Tc05_g001770       | Gorai.006G184600.1 | .                  | Gorai.    | . | . | . |
| 002G266000.1       | Gorai.012G118500.1 | .                  | .                  | Vv06g0838 | . | . | . |
| .                  | .                  | .                  | .                  | .         | . | . | . |
| Vv08g0457          | Tc05_g001750       | .                  | .                  | .         | . | . | . |
|                    | Vv06g0839          | .                  | .                  | .         | . | . | . |
|                    | Vv13g0123          | Tc10_g001000       | .                  | Gorai.    | . | . | . |
| 009G322800.1       | Gorai.012G079300.1 | .                  | .                  | .         | . | . | . |
| Vv08g0458          | .                  | .                  | .                  | .         | . | . | . |
| .                  | .                  | .                  | .                  | .         | . | . | . |
| Vv08g0459          | .                  | .                  | .                  | .         | . | . | . |
| .                  | .                  | .                  | .                  | .         | . | . | . |
| Vv08g0460          | Gorai.006G184700.1 | .                  | .                  | .         | . | . | . |
| Gorai.012G118700.1 | .                  | .                  | .                  | .         | . | . | . |
| .                  | .                  | .                  | .                  | .         | . | . | . |
| Vv08g0461          | Tc05_g001740       | Gorai.006G184800.1 | .                  | .         | . | . | . |
| .                  | .                  | .                  | .                  | .         | . | . | . |
| Vv08g0462          | Tc05_g001730       | Gorai.006G184900.1 | .                  | .         | . | . | . |
| .                  | .                  | .                  | .                  | .         | . | . | . |
| Vv08g0463          | Tc05_g001720       | Gorai.006G185000.1 | .                  | Gorai.    | . | . | . |
| 002G266100.1       | .                  | .                  | .                  | .         | . | . | . |
| .                  | .                  | .                  | .                  | .         | . | . | . |
| Vv08g0464          | .                  | .                  | .                  | .         | . | . | . |
| .                  | .                  | .                  | .                  | .         | . | . | . |
| Vv08g0465          | Tc05_g001710       | .                  | .                  | Gorai.    | . | . | . |
| 012G118800.1       | .                  | .                  | .                  | .         | . | . | . |
|                    | Vv13g0130          | Tc10_g000890       | .                  | .         | . | . | . |
|                    | Gorai.010G195000.1 | .                  | .                  | .         | . | . | . |
| Vv08g0466          | .                  | .                  | .                  | .         | . | . | . |
| .                  | .                  | .                  | .                  | .         | . | . | . |
| .                  | .                  | .                  | .                  | .         | . | . | . |

|                           |              |                    |              |
|---------------------------|--------------|--------------------|--------------|
| Vv08g0467<br>002G266200.1 | Tc05_g001700 | Gorai.006G185100.1 | Gorai.       |
| .                         | .            | .                  | .            |
| .                         | .            | .                  | .            |
| Vv08g0468                 | .            | .                  | .            |
| .                         | .            | .                  | .            |
| .                         | .            | .                  | .            |
| Vv08g0469<br>012G119100.1 | Tc05_g001680 | .                  | Gorai.       |
| .                         | .            | .                  | .            |
| .                         | .            | .                  | .            |
| Vv08g0470                 | Tc05_g001670 | .                  | .            |
| .                         | .            | .                  | .            |
| .                         | .            | .                  | .            |
| Vv08g0471                 | Tc05_g001650 | Gorai.002G266300.1 | .            |
| .                         | .            | .                  | .            |
| .                         | .            | .                  | .            |
| Vv08g0472                 | Tc05_g001640 | .                  | .            |
| .                         | .            | .                  | .            |
| .                         | .            | .                  | .            |
| Vv08g0473<br>002G266400.1 | Tc05_g001630 | Gorai.006G185200.1 | Gorai.       |
| .                         | .            | .                  | .            |
| .                         | .            | .                  | .            |
| Vv08g0474                 | Tc05_g001620 | .                  | .            |
| .                         | .            | .                  | .            |
| .                         | .            | .                  | .            |
| Vv08g0475                 | .            | .                  | .            |
| .                         | .            | .                  | .            |
| .                         | .            | .                  | .            |
| Vv08g0476<br>002G266500.1 | Tc05_g001610 | Gorai.006G185300.1 | Gorai.       |
| .                         | .            | .                  | .            |
| .                         | .            | Vv13g0139          | Tc10_g000810 |
| .                         | .            | Gorai.010G193900.1 | .            |
| Vv08g0477                 | .            | .                  | .            |
| .                         | .            | .                  | .            |
| .                         | .            | .                  | .            |
| Vv08g0478                 | Tc05_g001600 | .                  | .            |
| .                         | .            | .                  | .            |
| .                         | .            | .                  | .            |
| Vv08g0479                 | .            | .                  | .            |
| .                         | .            | .                  | .            |
| .                         | .            | .                  | .            |
| Vv08g0480<br>002G266600.1 | Tc05_g001590 | Gorai.006G185500.1 | Gorai.       |
| .                         | .            | .                  | .            |
| .                         | .            | .                  | .            |
| .                         | .            | .                  | .            |
| Vv08g0481<br>012G119200.1 | Tc05_g001580 | .                  | Gorai.       |
| .                         | .            | .                  | .            |
| .                         | .            | .                  | .            |
| Vv08g0482                 | Tc05_g001570 | Gorai.006G185700.1 | .            |

|                    |              |                    |        |   |        |   |   |
|--------------------|--------------|--------------------|--------|---|--------|---|---|
| .                  | .            | .                  | .      | . | .      | . | . |
| .                  | .            | .                  | .      | . | .      | . | . |
| Vv08g0483          | .            | .                  | .      | . | .      | . | . |
| .                  | .            | .                  | .      | . | .      | . | . |
| .                  | .            | .                  | .      | . | .      | . | . |
| Vv08g0484          | Tc05_g001560 | Gorai.006G185800.1 | Gorai. | . | .      | . | . |
| 002G266700.1       | .            | .                  | .      | . | .      | . | . |
| .                  | .            | .                  | .      | . | .      | . | . |
| .                  | .            | .                  | .      | . | .      | . | . |
| Vv08g0485          | Tc05_g001550 | .                  | .      | . | .      | . | . |
| .                  | .            | .                  | .      | . | .      | . | . |
| .                  | .            | .                  | .      | . | .      | . | . |
| Vv08g0486          | .            | .                  | .      | . | .      | . | . |
| .                  | .            | .                  | .      | . | .      | . | . |
| .                  | .            | .                  | .      | . | .      | . | . |
| Vv08g0487          | Tc05_g001540 | .                  | .      | . | .      | . | . |
| Vv06g0876          | .            | .                  | .      | . | .      | . | . |
| .                  | .            | .                  | .      | . | .      | . | . |
| Vv08g0488          | Tc05_g001520 | Gorai.006G185900.1 | .      | . | .      | . | . |
| Gorai.012G119300.1 | .            | .                  | .      | . | .      | . | . |
| .                  | .            | .                  | .      | . | .      | . | . |
| .                  | .            | .                  | .      | . | .      | . | . |
| Vv08g0489          | Tc05_g001510 | .                  | .      | . | Gorai. | . | . |
| 012G119400.1       | Vv06g0878    | .                  | .      | . | .      | . | . |
| .                  | .            | .                  | .      | . | .      | . | . |
| .                  | .            | .                  | .      | . | .      | . | . |
| Vv08g0490          | Tc05_g001500 | Gorai.002G266800.1 | .      | . | .      | . | . |
| Gorai.012G119500.1 | .            | .                  | .      | . | .      | . | . |
| .                  | .            | .                  | .      | . | .      | . | . |
| .                  | .            | .                  | .      | . | .      | . | . |
| Vv08g0491          | Tc05_g001480 | .                  | .      | . | Gorai. | . | . |
| 012G119600.1       | .            | .                  | .      | . | .      | . | . |
| .                  | .            | .                  | .      | . | .      | . | . |
| .                  | .            | .                  | .      | . | .      | . | . |
| Vv08g0492          | .            | .                  | .      | . | .      | . | . |
| .                  | .            | .                  | .      | . | .      | . | . |
| .                  | .            | .                  | .      | . | .      | . | . |
| Vv08g0493          | Tc05_g001470 | Gorai.002G266900.1 | .      | . | .      | . | . |
| .                  | .            | .                  | .      | . | .      | . | . |
| .                  | .            | .                  | .      | . | .      | . | . |
| Vv08g0494          | .            | .                  | .      | . | .      | . | . |
| .                  | .            | .                  | .      | . | .      | . | . |
| .                  | .            | .                  | .      | . | .      | . | . |
| Vv08g0495          | Tc05_g001450 | .                  | .      | . | .      | . | . |
| .                  | .            | .                  | .      | . | .      | . | . |
| .                  | .            | .                  | .      | . | .      | . | . |
| Vv08g0496          | .            | .                  | .      | . | .      | . | . |
| .                  | .            | .                  | .      | . | .      | . | . |
| .                  | .            | .                  | .      | . | .      | . | . |
| Vv08g0497          | Tc05_g001440 | .                  | .      | . | .      | . | . |
| .                  | .            | .                  | .      | . | .      | . | . |

|                    |              |                    |   |                    |   |                    |   |
|--------------------|--------------|--------------------|---|--------------------|---|--------------------|---|
| Vv08g0498          | .            | .                  | . | .                  | . | .                  | . |
| .                  | .            | .                  | . | .                  | . | .                  | . |
| Vv08g0499          | .            | .                  | . | .                  | . | .                  | . |
| .                  | .            | .                  | . | .                  | . | .                  | . |
| Vv08g0500          | Tc05_g001430 | .                  | . | .                  | . | Gorai.             | . |
| 012G119700.1       | .            | .                  | . | .                  | . | .                  | . |
| .                  | Vv13g0155    | .                  | . | .                  | . | .                  | . |
| Gorai.010G193200.1 | .            | .                  | . | .                  | . | .                  | . |
| Vv08g0501          | .            | .                  | . | .                  | . | .                  | . |
| .                  | .            | .                  | . | .                  | . | .                  | . |
| Vv08g0502          | Tc05_g001420 | Gorai.006G186000.1 | . | .                  | . | Gorai.             | . |
| 002G267000.1       | .            | .                  | . | .                  | . | .                  | . |
| .                  | .            | .                  | . | .                  | . | .                  | . |
| Vv08g0503          | .            | .                  | . | .                  | . | .                  | . |
| .                  | .            | .                  | . | .                  | . | .                  | . |
| Vv08g0504          | Tc05_g000290 | .                  | . | Gorai.002G267100.1 | . | .                  | . |
| .                  | .            | .                  | . | .                  | . | .                  | . |
| Vv08g0505          | .            | .                  | . | .                  | . | .                  | . |
| .                  | .            | .                  | . | .                  | . | .                  | . |
| Vv08g0506          | Tc05_g000270 | .                  | . | Gorai.002G267300.1 | . | .                  | . |
| .                  | Vv06g0883    | .                  | . | .                  | . | .                  | . |
| .                  | .            | .                  | . | .                  | . | .                  | . |
| Vv08g0507          | .            | .                  | . | .                  | . | .                  | . |
| .                  | .            | .                  | . | .                  | . | .                  | . |
| Vv08g0508          | .            | .                  | . | .                  | . | .                  | . |
| .                  | .            | .                  | . | .                  | . | Vv13g0158          | . |
| .                  | Tc10_g000660 | .                  | . | .                  | . | Gorai.010G192900.1 | . |
| Vv08g0509          | Tc05_g000260 | .                  | . | .                  | . | Gorai.             | . |
| 012G119800.1       | .            | .                  | . | .                  | . | .                  | . |
| Vv08g0510          | .            | .                  | . | .                  | . | .                  | . |
| .                  | .            | .                  | . | .                  | . | Vv13g0159          | . |
| Vv08g0511          | .            | .                  | . | .                  | . | .                  | . |
| .                  | .            | .                  | . | .                  | . | .                  | . |
| Vv08g0512          | .            | .                  | . | .                  | . | .                  | . |
| .                  | .            | .                  | . | .                  | . | .                  | . |
| .                  | .            | .                  | . | .                  | . | .                  | . |

|              |   |   |   |   |   |        |   |
|--------------|---|---|---|---|---|--------|---|
| Vv08g0513    | . | . | . | . | . | .      | . |
| .            | . | . | . | . | . | .      | . |
| .            | . | . | . | . | . | .      | . |
| Vv08g0514    | . | . | . | . | . | .      | . |
| Vv06g0891    | . | . | . | . | . | Gorai. | . |
| 003G151100.1 | . | . | . | . | . | .      | . |
| Vv08g0515    | . | . | . | . | . | .      | . |
| .            | . | . | . | . | . | .      | . |
| .            | . | . | . | . | . | .      | . |
| Vv08g0516    | . | . | . | . | . | .      | . |
| .            | . | . | . | . | . | .      | . |
| .            | . | . | . | . | . | .      | . |
| Vv08g0517    | . | . | . | . | . | .      | . |
| .            | . | . | . | . | . | .      | . |
| .            | . | . | . | . | . | .      | . |
| Vv08g0518    | . | . | . | . | . | .      | . |
| .            | . | . | . | . | . | .      | . |
| .            | . | . | . | . | . | .      | . |
| Vv08g0519    | . | . | . | . | . | .      | . |
| .            | . | . | . | . | . | .      | . |
| .            | . | . | . | . | . | .      | . |
| Vv08g0520    | . | . | . | . | . | .      | . |
| .            | . | . | . | . | . | .      | . |
| .            | . | . | . | . | . | .      | . |
| Vv08g0521    | . | . | . | . | . | .      | . |
| .            | . | . | . | . | . | .      | . |
| .            | . | . | . | . | . | .      | . |
| Vv08g0522    | . | . | . | . | . | .      | . |
| .            | . | . | . | . | . | .      | . |
| .            | . | . | . | . | . | .      | . |
| Vv08g0523    | . | . | . | . | . | .      | . |
| .            | . | . | . | . | . | .      | . |
| .            | . | . | . | . | . | .      | . |
| Vv08g0524    | . | . | . | . | . | .      | . |
| Vv06g0894    | . | . | . | . | . | .      | . |
| .            | . | . | . | . | . | .      | . |
| Vv08g0525    | . | . | . | . | . | .      | . |
| .            | . | . | . | . | . | .      | . |
| .            | . | . | . | . | . | .      | . |
| Vv08g0526    | . | . | . | . | . | .      | . |
| .            | . | . | . | . | . | .      | . |
| .            | . | . | . | . | . | .      | . |
| Vv08g0527    | . | . | . | . | . | .      | . |
| .            | . | . | . | . | . | .      | . |
| .            | . | . | . | . | . | .      | . |
| Vv08g0528    | . | . | . | . | . | .      | . |
| Vv06g0899    | . | . | . | . | . | .      | . |
| Vv13g0164    | . | . | . | . | . | .      | . |
| Vv08g0529    | . | . | . | . | . | .      | . |
| .            | . | . | . | . | . | .      | . |

|                    |   |                    |   |   |   |           |   |
|--------------------|---|--------------------|---|---|---|-----------|---|
| Vv08g0530          | . | .                  | . | . | . | .         | . |
| .                  | . | .                  | . | . | . | .         | . |
| Vv08g0531          | . | .                  | . | . | . | .         | . |
| .                  | . | .                  | . | . | . | .         | . |
| Vv08g0532          | . | .                  | . | . | . | .         | . |
| .                  | . | .                  | . | . | . | .         | . |
| Vv08g0533          | . | .                  | . | . | . | .         | . |
| .                  | . | .                  | . | . | . | .         | . |
| Vv08g0534          | . | .                  | . | . | . | .         | . |
| .                  | . | .                  | . | . | . | .         | . |
| Vv08g0535          | . | .                  | . | . | . | .         | . |
| .                  | . | .                  | . | . | . | .         | . |
| Vv08g0536          | . | .                  | . | . | . | .         | . |
| .                  | . | .                  | . | . | . | .         | . |
| Vv08g0537          | . | .                  | . | . | . | .         | . |
| .                  | . | .                  | . | . | . | .         | . |
| .                  | . | Gorai.011G210600.1 | . | . | . | Vv13g0171 | . |
| 010G217900.1       | . | Gorai.012G015700.1 | . | . | . | Gorai.    | . |
| Vv08g0538          | . | .                  | . | . | . | .         | . |
| .                  | . | .                  | . | . | . | .         | . |
| Vv08g0539          | . | .                  | . | . | . | .         | . |
| .                  | . | .                  | . | . | . | .         | . |
| Vv08g0540          | . | .                  | . | . | . | .         | . |
| .                  | . | .                  | . | . | . | .         | . |
| Vv08g0541          | . | .                  | . | . | . | .         | . |
| .                  | . | .                  | . | . | . | .         | . |
| Vv08g0542          | . | .                  | . | . | . | .         | . |
| .                  | . | .                  | . | . | . | .         | . |
| Vv08g0543          | . | .                  | . | . | . | .         | . |
| .                  | . | .                  | . | . | . | .         | . |
| Vv08g0544          | . | .                  | . | . | . | .         | . |
| .                  | . | .                  | . | . | . | .         | . |
| .                  | . | Gorai.011G210200.1 | . | . | . | Vv13g0179 | . |
| Gorai.012G015500.1 | . | .                  | . | . | . | .         | . |
| Vv08g0545          | . | .                  | . | . | . | .         | . |
| .                  | . | .                  | . | . | . | .         | . |



|              |                    |   |   |                    |   |   |   |
|--------------|--------------------|---|---|--------------------|---|---|---|
| Vv08g0546    | .                  | . | . | .                  | . | . | . |
| .            | .                  | . | . | .                  | . | . | . |
| Vv08g0547    | .                  | . | . | .                  | . | . | . |
| .            | .                  | . | . | .                  | . | . | . |
| Vv08g0548    | .                  | . | . | .                  | . | . | . |
| Vv06g0920    | .                  | . | . | .                  | . | . | . |
| .            | .                  | . | . | .                  | . | . | . |
| Vv08g0549    | .                  | . | . | .                  | . | . | . |
| .            | .                  | . | . | .                  | . | . | . |
| Vv08g0550    | .                  | . | . | .                  | . | . | . |
| .            | .                  | . | . | .                  | . | . | . |
| Vv08g0551    | .                  | . | . | .                  | . | . | . |
| .            | .                  | . | . | .                  | . | . | . |
| Vv08g0552    | .                  | . | . | .                  | . | . | . |
| Vv06g0923    | .                  | . | . | .                  | . | . | . |
| Vv13g0187    | .                  | . | . | .                  | . | . | . |
| Vv08g0553    | .                  | . | . | .                  | . | . | . |
| .            | .                  | . | . | .                  | . | . | . |
| Vv08g0554    | .                  | . | . | .                  | . | . | . |
| .            | .                  | . | . | .                  | . | . | . |
| Vv08g0555    | Tc05_g028090       | . | . | .                  | . | . | . |
| .            | .                  | . | . | .                  | . | . | . |
| Vv08g0556    | .                  | . | . | .                  | . | . | . |
| .            | .                  | . | . | .                  | . | . | . |
| Vv08g0557    | Tc05_g024960       | . | . | Gorai.007G266900.1 | . | . | . |
| .            | Vv06g0927          | . | . | Gorai.013G272000.1 | . | . | . |
| Tc10_g016330 | Gorai.013G007000.1 | . | . | Vv13g0211          | . | . | . |
| .            | Gorai.012G014400.1 | . | . | Gorai.011G209100.1 | . | . | . |
| Vv08g0558    | .                  | . | . | .                  | . | . | . |
| .            | .                  | . | . | .                  | . | . | . |
| Vv08g0559    | .                  | . | . | .                  | . | . | . |
| .            | .                  | . | . | .                  | . | . | . |
| Vv08g0560    | .                  | . | . | .                  | . | . | . |
| .            | .                  | . | . | .                  | . | . | . |
| Vv08g0561    | .                  | . | . | .                  | . | . | . |
| .            | .                  | . | . | .                  | . | . | . |

|                    |                    |   |   |   |   |           |   |
|--------------------|--------------------|---|---|---|---|-----------|---|
| Vv08g0562          | .                  | . | . | . | . | .         | . |
| .                  | .                  | . | . | . | . | .         | . |
| Vv08g0563          | .                  | . | . | . | . | .         | . |
| .                  | .                  | . | . | . | . | .         | . |
| Vv08g0564          | .                  | . | . | . | . | .         | . |
| .                  | .                  | . | . | . | . | .         | . |
| Vv08g0565          | .                  | . | . | . | . | .         | . |
| .                  | .                  | . | . | . | . | .         | . |
| Vv08g0566          | .                  | . | . | . | . | .         | . |
| .                  | .                  | . | . | . | . | .         | . |
| Vv08g0567          | .                  | . | . | . | . | .         | . |
| Vv06g0938          | .                  | . | . | . | . | .         | . |
| .                  | .                  | . | . | . | . | .         | . |
| Vv08g0568          | .                  | . | . | . | . | .         | . |
| .                  | .                  | . | . | . | . | .         | . |
| Vv08g0569          | .                  | . | . | . | . | .         | . |
| .                  | .                  | . | . | . | . | .         | . |
| Vv08g0570          | .                  | . | . | . | . | .         | . |
| .                  | .                  | . | . | . | . | .         | . |
| Vv08g0571          | .                  | . | . | . | . | .         | . |
| .                  | .                  | . | . | . | . | .         | . |
| Vv08g0572          | .                  | . | . | . | . | .         | . |
| .                  | .                  | . | . | . | . | Vv13g0228 | . |
| .                  | Gorai.013G002900.1 | . | . | . | . | .         | . |
| Vv08g0573          | .                  | . | . | . | . | .         | . |
| .                  | .                  | . | . | . | . | .         | . |
| Vv08g0574          | Tc05_g005710       | . | . | . | . | .         | . |
| .                  | .                  | . | . | . | . | .         | . |
| Vv13g0231          | Tc10_g016560       | . | . | . | . | .         | . |
| Gorai.012G014000.1 | .                  | . | . | . | . | .         | . |
| Vv08g0575          | .                  | . | . | . | . | .         | . |
| .                  | .                  | . | . | . | . | .         | . |
| Vv08g0576          | .                  | . | . | . | . | .         | . |
| .                  | .                  | . | . | . | . | .         | . |
| Vv08g0577          | .                  | . | . | . | . | .         | . |
| .                  | .                  | . | . | . | . | Vv13g0235 | . |
| Tc10_g016600       | .                  | . | . | . | . | .         | . |

|           |              |                    |   |   |   |   |   |
|-----------|--------------|--------------------|---|---|---|---|---|
| Vv08g0578 | .            | .                  | . | . | . | . | . |
| .         | .            | .                  | . | . | . | . | . |
| Vv08g0579 | .            | .                  | . | . | . | . | . |
| .         | .            | .                  | . | . | . | . | . |
| Vv08g0580 | .            | .                  | . | . | . | . | . |
| .         | .            | .                  | . | . | . | . | . |
| Vv08g0581 | .            | .                  | . | . | . | . | . |
| .         | .            | .                  | . | . | . | . | . |
| Vv08g0582 | .            | .                  | . | . | . | . | . |
| .         | .            | .                  | . | . | . | . | . |
| Vv08g0583 | Tc05_g028320 | .                  | . | . | . | . | . |
| .         | .            | .                  | . | . | . | . | . |
| Vv08g0584 | .            | .                  | . | . | . | . | . |
| .         | .            | .                  | . | . | . | . | . |
| Vv08g0585 | .            | .                  | . | . | . | . | . |
| .         | .            | .                  | . | . | . | . | . |
| Vv08g0586 | .            | .                  | . | . | . | . | . |
| .         | .            | .                  | . | . | . | . | . |
| Vv08g0587 | .            | .                  | . | . | . | . | . |
| .         | .            | .                  | . | . | . | . | . |
| Vv08g0588 | Tc05_g005850 | Gorai.006G169000.1 | . | . | . | . | . |
| .         | .            | .                  | . | . | . | . | . |
| Vv08g0589 | Tc05_g024980 | Gorai.007G267200.1 | . | . | . | . | . |
| .         | .            | .                  | . | . | . | . | . |
| Vv08g0590 | .            | .                  | . | . | . | . | . |
| .         | .            | .                  | . | . | . | . | . |
| Vv08g0591 | Tc05_g023640 | .                  | . | . | . | . | . |
| Vv06g0947 | Tc09_g024080 | .                  | . | . | . | . | . |
| .         | .            | .                  | . | . | . | . | . |
| Vv08g0592 | .            | .                  | . | . | . | . | . |
| .         | .            | .                  | . | . | . | . | . |
| Vv08g0593 | .            | .                  | . | . | . | . | . |
| .         | .            | .                  | . | . | . | . | . |
| Vv08g0594 | .            | .                  | . | . | . | . | . |
| .         | .            | .                  | . | . | . | . | . |

|                    |                    |   |   |   |   |                    |   |
|--------------------|--------------------|---|---|---|---|--------------------|---|
| Vv08g0595          | .                  | . | . | . | . | .                  | . |
| .                  | .                  | . | . | . | . | .                  | . |
| Vv08g0596          | .                  | . | . | . | . | .                  | . |
| Vv11g0480          | Tc09_g010570       | . | . | . | . | Gorai.             | . |
| 009G021900.1       | .                  | . | . | . | . | .                  | . |
| .                  | .                  | . | . | . | . | .                  | . |
| Vv08g0597          | .                  | . | . | . | . | .                  | . |
| .                  | .                  | . | . | . | . | .                  | . |
| Vv08g0598          | Tc05_g028350       | . | . | . | . | .                  | . |
| Vv11g0478          | Tc09_g010550       | . | . | . | . | Gorai.001G002800.1 | . |
| .                  | Gorai.009G022100.1 | . | . | . | . | Gorai.010G067300.1 | . |
| .                  | .                  | . | . | . | . | .                  | . |
| Vv08g0599          | .                  | . | . | . | . | .                  | . |
| .                  | .                  | . | . | . | . | .                  | . |
| .                  | .                  | . | . | . | . | .                  | . |
| Vv08g0600          | Tc05_g028570       | . | . | . | . | .                  | . |
| Vv11g0459          | Tc09_g010330       | . | . | . | . | .                  | . |
| Gorai.009G022700.1 | Gorai.010G068600.1 | . | . | . | . | .                  | . |
| .                  | .                  | . | . | . | . | .                  | . |
| Vv08g0601          | Tc05_g006090       | . | . | . | . | Gorai.002G249400.1 | . |
| .                  | .                  | . | . | . | . | .                  | . |
| .                  | .                  | . | . | . | . | .                  | . |
| Vv08g0602          | .                  | . | . | . | . | .                  | . |
| .                  | .                  | . | . | . | . | .                  | . |
| .                  | .                  | . | . | . | . | .                  | . |
| Vv08g0603          | .                  | . | . | . | . | .                  | . |
| .                  | .                  | . | . | . | . | .                  | . |
| .                  | .                  | . | . | . | . | .                  | . |
| Vv08g0604          | .                  | . | . | . | . | .                  | . |
| .                  | .                  | . | . | . | . | .                  | . |
| .                  | .                  | . | . | . | . | .                  | . |
| Vv08g0605          | .                  | . | . | . | . | .                  | . |
| .                  | .                  | . | . | . | . | .                  | . |
| .                  | .                  | . | . | . | . | .                  | . |
| Vv08g0606          | .                  | . | . | . | . | .                  | . |
| .                  | .                  | . | . | . | . | .                  | . |
| .                  | .                  | . | . | . | . | .                  | . |
| Vv08g0607          | .                  | . | . | . | . | .                  | . |
| .                  | .                  | . | . | . | . | .                  | . |
| .                  | .                  | . | . | . | . | .                  | . |
| Vv08g0608          | .                  | . | . | . | . | .                  | . |
| .                  | .                  | . | . | . | . | .                  | . |
| .                  | .                  | . | . | . | . | .                  | . |
| Vv08g0609          | .                  | . | . | . | . | .                  | . |
| .                  | .                  | . | . | . | . | .                  | . |
| .                  | .                  | . | . | . | . | .                  | . |
| Vv08g0610          | .                  | . | . | . | . | .                  | . |

|              |                    |   |   |                    |   |        |   |
|--------------|--------------------|---|---|--------------------|---|--------|---|
| .            | .                  | . | . | .                  | . | .      | . |
| .            | .                  | . | . | .                  | . | .      | . |
| Vv08g0611    | .                  | . | . | .                  | . | .      | . |
| .            | .                  | . | . | .                  | . | .      | . |
| Vv08g0612    | .                  | . | . | .                  | . | .      | . |
| .            | .                  | . | . | .                  | . | .      | . |
| Vv08g0613    | .                  | . | . | .                  | . | .      | . |
| .            | .                  | . | . | .                  | . | .      | . |
| Vv08g0614    | .                  | . | . | .                  | . | .      | . |
| .            | .                  | . | . | .                  | . | .      | . |
| Vv08g0615    | .                  | . | . | .                  | . | Gorai. | . |
| 007G351000.1 | .                  | . | . | .                  | . | .      | . |
| .            | .                  | . | . | .                  | . | .      | . |
| Vv08g0616    | .                  | . | . | .                  | . | .      | . |
| .            | .                  | . | . | .                  | . | .      | . |
| Vv08g0617    | Tc05_g006160       | . | . | .                  | . | .      | . |
| .            | .                  | . | . | .                  | . | .      | . |
| Vv08g0618    | .                  | . | . | .                  | . | .      | . |
| .            | .                  | . | . | .                  | . | .      | . |
| Vv08g0619    | .                  | . | . | .                  | . | .      | . |
| .            | .                  | . | . | .                  | . | .      | . |
| Vv08g0620    | .                  | . | . | .                  | . | .      | . |
| .            | .                  | . | . | .                  | . | .      | . |
| Vv08g0621    | .                  | . | . | .                  | . | .      | . |
| .            | .                  | . | . | .                  | . | .      | . |
| Vv08g0622    | .                  | . | . | .                  | . | .      | . |
| .            | .                  | . | . | .                  | . | .      | . |
| Vv08g0623    | Tc05_g023620       | . | . | Gorai.007G256400.1 | . | .      | . |
| .            | Gorai.007G350900.1 | . | . | .                  | . | .      | . |
| .            | .                  | . | . | .                  | . | .      | . |
| Vv08g0624    | .                  | . | . | .                  | . | .      | . |
| .            | .                  | . | . | .                  | . | .      | . |
| Vv08g0625    | Tc05_g028670       | . | . | .                  | . | .      | . |
| .            | .                  | . | . | .                  | . | .      | . |
| Vv08g0626    | .                  | . | . | .                  | . | .      | . |
| .            | .                  | . | . | .                  | . | .      | . |

|              |                    |              |   |   |        |   |
|--------------|--------------------|--------------|---|---|--------|---|
| Vv08g0627    | Tc05_g015950       | .            | . | . | .      | . |
| .            | .                  | .            | . | . | .      | . |
| Vv08g0628    | Tc05_g025070       | .            | . | . | .      | . |
| .            | .                  | .            | . | . | .      | . |
| Vv08g0629    | .                  | .            | . | . | .      | . |
| .            | .                  | .            | . | . | .      | . |
| Vv08g0630    | .                  | .            | . | . | .      | . |
| .            | .                  | .            | . | . | .      | . |
| Vv08g0631    | Tc05_g015920       | .            | . | . | .      | . |
| .            | .                  | .            | . | . | .      | . |
| Vv08g0632    | .                  | .            | . | . | .      | . |
| .            | .                  | .            | . | . | .      | . |
| Vv08g0633    | .                  | .            | . | . | .      | . |
| .            | .                  | .            | . | . | .      | . |
| Vv08g0634    | Tc05_g015620       | .            | . | . | .      | . |
| Vv11g0447    | .                  | .            | . | . | .      | . |
| Vv08g0635    | .                  | .            | . | . | .      | . |
| .            | .                  | .            | . | . | .      | . |
| Vv08g0636    | .                  | .            | . | . | Gorai. | . |
| 007G350800.1 | Vv11g0408          | Tc09_g009860 | . | . | .      | . |
| .            | Gorai.010G070800.1 | .            | . | . | .      | . |
| Vv08g0637    | .                  | .            | . | . | .      | . |
| .            | .                  | .            | . | . | .      | . |
| Vv08g0638    | .                  | .            | . | . | .      | . |
| .            | .                  | .            | . | . | .      | . |
| Vv08g0639    | .                  | .            | . | . | .      | . |
| .            | .                  | .            | . | . | .      | . |
| Vv08g0640    | .                  | .            | . | . | .      | . |
| .            | .                  | .            | . | . | .      | . |
| Vv08g0641    | Tc05_g025560       | .            | . | . | .      | . |
| .            | .                  | .            | . | . | .      | . |
| Vv08g0642    | .                  | .            | . | . | .      | . |
| Vv11g0393    | Tc09_g009680       | .            | . | . | Gorai. | . |
| 009G025400.1 | Gorai.010G072100.1 | Vv03g0771    | . | . | .      | . |

|              |                    |   |   |   |        |
|--------------|--------------------|---|---|---|--------|
| Tc02_g010000 | Gorai.013G049500.1 | . | . | . | .      |
| Vv08g0643    | .                  | . | . | . | Gorai. |
| 007G351100.1 | .                  | . | . | . | .      |
| .            | .                  | . | . | . | .      |
| Vv08g0644    | .                  | . | . | . | .      |
| .            | .                  | . | . | . | .      |
| Vv08g0645    | .                  | . | . | . | .      |
| .            | .                  | . | . | . | .      |
| Vv08g0646    | .                  | . | . | . | .      |
| .            | .                  | . | . | . | .      |
| Vv08g0647    | .                  | . | . | . | .      |
| .            | .                  | . | . | . | .      |
| Vv08g0648    | .                  | . | . | . | .      |
| .            | .                  | . | . | . | .      |
| Vv08g0649    | .                  | . | . | . | .      |
| .            | .                  | . | . | . | .      |
| Vv08g0650    | Tc05_g020760       | . | . | . | .      |
| .            | .                  | . | . | . | .      |
| Vv08g0651    | .                  | . | . | . | .      |
| .            | .                  | . | . | . | .      |
| Vv08g0652    | .                  | . | . | . | .      |
| .            | .                  | . | . | . | .      |
| Vv08g0653    | .                  | . | . | . | .      |
| .            | .                  | . | . | . | .      |
| Vv08g0654    | .                  | . | . | . | .      |
| .            | .                  | . | . | . | .      |
| Vv08g0655    | .                  | . | . | . | .      |
| .            | .                  | . | . | . | .      |
| Vv08g0656    | .                  | . | . | . | Gorai. |
| 007G351300.1 | .                  | . | . | . | .      |
| .            | .                  | . | . | . | .      |
| Vv08g0657    | .                  | . | . | . | .      |
| .            | .                  | . | . | . | .      |
| Vv08g0658    | .                  | . | . | . | .      |
| .            | .                  | . | . | . | .      |
| Vv08g0659    | .                  | . | . | . | .      |

|           |                    |                    |   |   |                    |           |   |
|-----------|--------------------|--------------------|---|---|--------------------|-----------|---|
| .         | .                  | .                  | . | . | .                  | .         | . |
| .         | .                  | .                  | . | . | .                  | .         | . |
| Vv08g0660 | .                  | .                  | . | . | .                  | .         | . |
| .         | .                  | .                  | . | . | .                  | .         | . |
| Vv08g0661 | .                  | .                  | . | . | .                  | .         | . |
| .         | .                  | .                  | . | . | .                  | .         | . |
|           | Tc02_g010170       | Gorai.013G050300.1 | . | . | Gorai.005G231800.1 | Vv03g0788 | . |
|           | Gorai.002G010300.1 | .                  | . | . | .                  | .         | . |
| Vv08g0662 | Tc05_g025820       | .                  | . | . | .                  | .         | . |
| .         | .                  | .                  | . | . | .                  | .         | . |
| Vv08g0663 | .                  | .                  | . | . | .                  | .         | . |
| .         | .                  | .                  | . | . | .                  | .         | . |
| Vv08g0664 | .                  | .                  | . | . | .                  | .         | . |
| .         | .                  | .                  | . | . | .                  | .         | . |
| Vv08g0665 | Tc05_g013910       | .                  | . | . | .                  | .         | . |
| .         | .                  | .                  | . | . | .                  | .         | . |
| Vv08g0666 | .                  | .                  | . | . | .                  | .         | . |
| .         | .                  | .                  | . | . | .                  | .         | . |
| Vv08g0667 | Tc05_g013960       | .                  | . | . | .                  | .         | . |
| .         | .                  | .                  | . | . | .                  | .         | . |
| Vv08g0668 | Tc05_g013970       | .                  | . | . | .                  | .         | . |
| .         | .                  | .                  | . | . | .                  | .         | . |
| Vv08g0669 | .                  | .                  | . | . | .                  | .         | . |
| .         | .                  | .                  | . | . | .                  | .         | . |
| Vv08g0670 | .                  | .                  | . | . | .                  | .         | . |
| .         | .                  | .                  | . | . | .                  | .         | . |
| Vv08g0671 | .                  | .                  | . | . | .                  | .         | . |
| .         | .                  | .                  | . | . | .                  | .         | . |
| Vv08g0672 | .                  | .                  | . | . | .                  | .         | . |
| .         | .                  | .                  | . | . | .                  | .         | . |
| Vv08g0673 | .                  | .                  | . | . | .                  | .         | . |
| .         | .                  | .                  | . | . | .                  | .         | . |
| Vv08g0674 | Tc05_g002920       | Gorai.006G180700.1 | . | . | .                  | .         | . |
| .         | Vv11g0370          | .                  | . | . | .                  | .         | . |
| .         | .                  | .                  | . | . | .                  | .         | . |
| Vv08g0675 | .                  | .                  | . | . | .                  | .         | . |



|                    |                    |   |   |   |                    |        |   |
|--------------------|--------------------|---|---|---|--------------------|--------|---|
| .                  | .                  | . | . | . | .                  | .      | . |
| .                  | .                  | . | . | . | .                  | .      | . |
| Vv08g0676          | Tc05_g014000       | . | . | . | .                  | .      | . |
| .                  | .                  | . | . | . | .                  | .      | . |
| .                  | .                  | . | . | . | .                  | .      | . |
| Vv08g0677          | .                  | . | . | . | .                  | .      | . |
| .                  | .                  | . | . | . | .                  | .      | . |
| .                  | .                  | . | . | . | .                  | .      | . |
| Vv08g0678          | .                  | . | . | . | .                  | .      | . |
| .                  | .                  | . | . | . | .                  | .      | . |
| .                  | .                  | . | . | . | .                  | .      | . |
| Vv08g0679          | .                  | . | . | . | .                  | .      | . |
| .                  | .                  | . | . | . | .                  | .      | . |
| .                  | .                  | . | . | . | .                  | .      | . |
| Vv08g0680          | Tc05_g014010       | . | . | . | .                  | .      | . |
| .                  | .                  | . | . | . | .                  | .      | . |
| .                  | .                  | . | . | . | .                  | .      | . |
| Vv08g0681          | .                  | . | . | . | .                  | .      | . |
| .                  | .                  | . | . | . | .                  | .      | . |
| .                  | .                  | . | . | . | .                  | .      | . |
| Vv08g0682          | Tc05_g014020       | . | . | . | .                  | .      | . |
| .                  | .                  | . | . | . | .                  | .      | . |
| .                  | .                  | . | . | . | .                  | .      | . |
| Vv08g0683          | Tc05_g014150       | . | . | . | .                  | .      | . |
| Gorai.007G351500.1 | .                  | . | . | . | .                  | .      | . |
| .                  | .                  | . | . | . | .                  | .      | . |
| Vv08g0684          | Tc05_g025880       | . | . | . | .                  | .      | . |
| .                  | .                  | . | . | . | .                  | .      | . |
| .                  | .                  | . | . | . | .                  | .      | . |
| Vv08g0685          | .                  | . | . | . | .                  | .      | . |
| .                  | .                  | . | . | . | .                  | .      | . |
| .                  | .                  | . | . | . | .                  | .      | . |
| Vv08g0686          | Tc05_g020840       | . | . | . | Gorai.007G249200.1 | .      | . |
| .                  | Gorai.007G348100.1 | . | . | . | .                  | .      | . |
| .                  | .                  | . | . | . | .                  | .      | . |
| .                  | .                  | . | . | . | .                  | .      | . |
| Vv08g0687          | .                  | . | . | . | .                  | Gorai. | . |
| 007G351700.1       | Vv03g0815          | . | . | . | Gorai.013G050900.1 | .      | . |
| Gorai.005G230300.1 | .                  | . | . | . | .                  | .      | . |
| .                  | .                  | . | . | . | .                  | .      | . |
| Vv08g0688          | .                  | . | . | . | .                  | .      | . |
| .                  | .                  | . | . | . | .                  | .      | . |
| .                  | .                  | . | . | . | .                  | .      | . |
| Vv08g0689          | .                  | . | . | . | .                  | .      | . |
| .                  | .                  | . | . | . | .                  | .      | . |
| .                  | .                  | . | . | . | .                  | .      | . |
| Vv08g0690          | .                  | . | . | . | .                  | .      | . |
| .                  | .                  | . | . | . | .                  | .      | . |
| .                  | .                  | . | . | . | .                  | .      | . |
| Vv08g0691          | .                  | . | . | . | .                  | .      | . |

|                    |              |   |   |   |   |        |   |
|--------------------|--------------|---|---|---|---|--------|---|
| .                  | .            | . | . | . | . | .      | . |
| .                  | .            | . | . | . | . | .      | . |
| Vv08g0692          | .            | . | . | . | . | Gorai. | . |
| 007G351800.1       | .            | . | . | . | . | .      | . |
| .                  | .            | . | . | . | . | .      | . |
| Vv08g0693          | Tc05_g003210 | . | . | . | . | .      | . |
| Gorai.007G346000.1 | Vv03g0870    | . | . | . | . | .      | . |
| .                  | .            | . | . | . | . | .      | . |
| .                  | .            | . | . | . | . | .      | . |
| Vv08g0694          | .            | . | . | . | . | .      | . |
| .                  | .            | . | . | . | . | .      | . |
| .                  | .            | . | . | . | . | .      | . |
| Vv08g0695          | .            | . | . | . | . | Gorai. | . |
| 007G343200.1       | .            | . | . | . | . | .      | . |
| .                  | .            | . | . | . | . | .      | . |
| Vv08g0696          | .            | . | . | . | . | .      | . |
| .                  | .            | . | . | . | . | .      | . |
| .                  | .            | . | . | . | . | .      | . |
| Vv08g0697          | Tc05_g010370 | . | . | . | . | .      | . |
| .                  | .            | . | . | . | . | .      | . |
| .                  | .            | . | . | . | . | .      | . |
| Vv08g0698          | Tc05_g025920 | . | . | . | . | .      | . |
| .                  | .            | . | . | . | . | .      | . |
| .                  | .            | . | . | . | . | .      | . |
| Vv08g0699          | .            | . | . | . | . | .      | . |
| .                  | .            | . | . | . | . | .      | . |
| .                  | .            | . | . | . | . | .      | . |
| Vv08g0700          | .            | . | . | . | . | .      | . |
| Vv03g0859          | Tc02_g013810 | . | . | . | . | .      | . |
| Vv03g0827          | .            | . | . | . | . | .      | . |
| Vv08g0701          | .            | . | . | . | . | .      | . |
| Vv03g0852          | Tc02_g013830 | . | . | . | . | .      | . |
| Vv03g0830          | .            | . | . | . | . | .      | . |
| Vv08g0702          | .            | . | . | . | . | .      | . |
| Vv03g0844          | .            | . | . | . | . | .      | . |
| Vv03g0832          | .            | . | . | . | . | .      | . |
| Vv08g0703          | .            | . | . | . | . | .      | . |
| .                  | .            | . | . | . | . | .      | . |
| .                  | .            | . | . | . | . | .      | . |
| Vv08g0704          | .            | . | . | . | . | .      | . |
| Vv03g0840          | Tc02_g013860 | . | . | . | . | .      | . |
| Vv03g0834          | .            | . | . | . | . | .      | . |
| Vv08g0705          | .            | . | . | . | . | .      | . |
| .                  | .            | . | . | . | . | .      | . |
| .                  | .            | . | . | . | . | .      | . |
| Vv08g0706          | .            | . | . | . | . | .      | . |
| Vv03g0832          | .            | . | . | . | . | .      | . |
| Vv03g0840          | Tc02_g013860 | . | . | . | . | .      | . |
| Vv08g0707          | .            | . | . | . | . | .      | . |
| .                  | .            | . | . | . | . | .      | . |

|              |              |   |   |   |   |        |
|--------------|--------------|---|---|---|---|--------|
| Vv08g0708    | .            | . | . | . | . | .      |
| Vv03g0827    | .            | . | . | . | . | .      |
| Vv03g0844    | .            | . | . | . | . | .      |
| Vv08g0709    | .            | . | . | . | . | .      |
| .            | .            | . | . | . | . | .      |
| Vv08g0710    | .            | . | . | . | . | .      |
| .            | .            | . | . | . | . | .      |
| Vv08g0711    | .            | . | . | . | . | Gorai. |
| 007G352100.1 | .            | . | . | . | . | .      |
| Vv08g0712    | Tc05_g010580 | . | . | . | . | .      |
| .            | .            | . | . | . | . | .      |
| Vv08g0713    | .            | . | . | . | . | .      |
| .            | .            | . | . | . | . | .      |
| Vv08g0714    | Tc05_g010650 | . | . | . | . | .      |
| .            | .            | . | . | . | . | .      |
| Vv08g0715    | .            | . | . | . | . | .      |
| .            | .            | . | . | . | . | .      |
| Vv08g0716    | .            | . | . | . | . | .      |
| .            | .            | . | . | . | . | .      |
| Vv08g0717    | .            | . | . | . | . | .      |
| .            | .            | . | . | . | . | .      |
| Vv08g0718    | .            | . | . | . | . | .      |
| .            | .            | . | . | . | . | .      |
| Vv08g0719    | .            | . | . | . | . | Gorai. |
| 007G352200.1 | .            | . | . | . | . | .      |
| Vv08g0720    | .            | . | . | . | . | .      |
| .            | .            | . | . | . | . | .      |
| Vv08g0721    | .            | . | . | . | . | Gorai. |
| 007G352300.1 | .            | . | . | . | . | .      |
| Vv08g0722    | Tc05_g026340 | . | . | . | . | .      |
| .            | .            | . | . | . | . | .      |
| Vv08g0723    | .            | . | . | . | . | .      |
| .            | .            | . | . | . | . | .      |
| Vv08g0724    | .            | . | . | . | . | Gorai. |

|                    |                    |                    |        |   |   |        |   |
|--------------------|--------------------|--------------------|--------|---|---|--------|---|
| 007G352400.1       | .                  | .                  | .      | . | . | .      | . |
| .                  | .                  | .                  | .      | . | . | .      | . |
| Vv08g0725          | .                  | .                  | .      | . | . | .      | . |
| .                  | .                  | .                  | .      | . | . | .      | . |
| Vv08g0726          | .                  | .                  | .      | . | . | .      | . |
| .                  | .                  | .                  | .      | . | . | .      | . |
| Vv08g0727          | .                  | .                  | .      | . | . | Gorai. | . |
| 007G352500.1       | .                  | .                  | .      | . | . | .      | . |
| .                  | .                  | .                  | .      | . | . | .      | . |
| Vv08g0728          | Tc05_g007050       | Gorai.006G163100.1 | Gorai. | . | . | .      | . |
| 002G247000.1       | .                  | .                  | .      | . | . | .      | . |
| .                  | .                  | .                  | .      | . | . | .      | . |
| Vv08g0729          | .                  | .                  | .      | . | . | .      | . |
| Vv13g0692          | .                  | .                  | .      | . | . | .      | . |
| .                  | .                  | .                  | .      | . | . | .      | . |
| Vv08g0730          | Tc05_g007030       | .                  | .      | . | . | .      | . |
| .                  | .                  | .                  | .      | . | . | .      | . |
| Vv08g0731          | Tc05_g007020       | .                  | .      | . | . | .      | . |
| .                  | .                  | .                  | .      | . | . | .      | . |
| Vv08g0732          | Tc05_g007000       | Gorai.006G163200.1 | .      | . | . | .      | . |
| .                  | .                  | .                  | .      | . | . | .      | . |
| Vv08g0733          | Tc05_g006970       | Gorai.006G163300.1 | .      | . | . | .      | . |
| Gorai.009G414600.1 | .                  | .                  | .      | . | . | .      | . |
| .                  | .                  | .                  | .      | . | . | .      | . |
| Vv08g0734          | Tc05_g006840       | Gorai.006G164000.1 | .      | . | . | .      | . |
| .                  | .                  | .                  | .      | . | . | .      | . |
| Vv08g0735          | Tc05_g006820       | Gorai.006G164200.1 | .      | . | . | .      | . |
| .                  | .                  | .                  | .      | . | . | .      | . |
| Vv08g0736          | Tc05_g006810       | Gorai.006G164300.1 | .      | . | . | .      | . |
| .                  | .                  | .                  | .      | . | . | .      | . |
| Vv08g0737          | Tc05_g006800       | Gorai.006G164400.1 | .      | . | . | .      | . |
| .                  | Gorai.007G373200.1 | .                  | .      | . | . | .      | . |
| .                  | .                  | .                  | .      | . | . | .      | . |
| Vv08g0738          | Tc05_g006780       | Gorai.006G164600.1 | .      | . | . | .      | . |
| .                  | .                  | .                  | .      | . | . | .      | . |
| Vv08g0739          | Tc05_g006770       | Gorai.006G164700.1 | .      | . | . | .      | . |
| .                  | .                  | .                  | .      | . | . | .      | . |
| .                  | .                  | .                  | .      | . | . | .      | . |

|              |                    |                    |                    |        |
|--------------|--------------------|--------------------|--------------------|--------|
| Vv08g0740    | Tc05_g006760       | .                  | Gorai.002G247700.1 | .      |
|              | Gorai.009G414900.1 | .                  | .                  | .      |
| .            | .                  | .                  | .                  | .      |
| Vv08g0741    | Tc05_g006750       | .                  | .                  | .      |
| .            | .                  | .                  | .                  | .      |
| Vv08g0742    | Tc05_g006740       | Gorai.006G164800.1 | .                  | .      |
| .            | Gorai.007G373300.1 | .                  | .                  | .      |
| .            | .                  | .                  | .                  | .      |
| Vv08g0743    | .                  | .                  | .                  | .      |
| .            | .                  | .                  | .                  | .      |
| Vv08g0744    | .                  | Gorai.006G165000.1 | .                  | .      |
| .            | .                  | .                  | .                  | .      |
| Vv08g0745    | .                  | .                  | .                  | .      |
| .            | .                  | .                  | .                  | .      |
| Vv08g0746    | Tc05_g006700       | .                  | .                  | .      |
| .            | .                  | .                  | .                  | .      |
| Vv08g0747    | Tc05_g006690       | Gorai.006G165100.1 | .                  | .      |
| .            | .                  | .                  | .                  | .      |
| Vv08g0748    | .                  | .                  | .                  | .      |
| .            | .                  | .                  | .                  | .      |
| Vv08g0749    | Tc05_g006680       | Gorai.006G165200.1 | .                  | .      |
|              | Gorai.009G415400.1 | .                  | .                  | .      |
| .            | .                  | .                  | .                  | .      |
| Vv08g0750    | .                  | .                  | .                  | .      |
| .            | .                  | .                  | .                  | .      |
| Vv08g0751    | .                  | .                  | .                  | .      |
| .            | .                  | .                  | .                  | .      |
| Vv08g0752    | Tc05_g006660       | .                  | .                  | Gorai. |
| 009G415500.1 | .                  | .                  | .                  | .      |
| .            | .                  | .                  | .                  | .      |
| Vv08g0753    | .                  | Gorai.006G165300.1 | .                  | .      |
| .            | Vv06g0292          | Tc09_g033700       | .                  | .      |
| .            | .                  | .                  | .                  | .      |
| Vv08g0754    | .                  | .                  | .                  | .      |
| .            | .                  | .                  | .                  | .      |
| Vv08g0755    | Tc05_g006640       | .                  | .                  | .      |

|                                                       |                                          |                    |                                 |        |
|-------------------------------------------------------|------------------------------------------|--------------------|---------------------------------|--------|
| Vv08g0756<br>009G415700.1                             | Tc05_g006630                             |                    |                                 | Gorai. |
| Vv08g0757                                             |                                          |                    |                                 |        |
| Vv08g0758                                             | Tc05_g006620<br>Gorai.007G373500.1       |                    | Gorai.002G247800.1<br>Vv06g0297 |        |
| Vv08g0759                                             |                                          |                    |                                 |        |
| Vv08g0760                                             | Tc05_g006590<br>Gorai.009G416200.1       | Gorai.006G165700.1 |                                 |        |
| Vv08g0761                                             |                                          |                    |                                 |        |
| Vv08g0762                                             | Tc05_g006560                             | Gorai.006G165900.1 |                                 |        |
| Vv08g0763<br>002G248000.1                             | Tc05_g006550<br>Gorai.009G416300.1       | Gorai.006G166000.1 | Gorai.<br>Gorai.007G373600.1    |        |
| Gorai.006G166000.1<br>Gorai.011G238400.1<br>Vv08g0764 | Vv06g0312<br>Vv13g0688                   | Tc10_g005730       |                                 |        |
| Vv08g0765                                             | Tc05_g006540                             |                    |                                 |        |
| Vv08g0766                                             |                                          |                    |                                 |        |
| Vv08g0767<br>Gorai.009G416700.1                       | Gorai.006G166200.1<br>Gorai.007G373800.1 |                    |                                 |        |
| Vv08g0768                                             | Tc05_g006530                             |                    |                                 |        |
| Vv08g0769                                             |                                          |                    |                                 |        |
| Vv08g0770                                             | Tc05_g006520                             | Gorai.006G166300.1 |                                 |        |

|                    |                    |                    |                    |   |        |
|--------------------|--------------------|--------------------|--------------------|---|--------|
|                    | Gorai.009G416900.1 | .                  | .                  | . | .      |
|                    | .                  | .                  | .                  | . | .      |
| Vv08g0771          | Tc05_g006510       | .                  | Gorai.002G248200.1 | . | .      |
|                    | Vv06g0316          | .                  | Tc09_g033600       | . | .      |
|                    | Gorai.009G108500.1 | .                  | Gorai.003G143300.1 | . | .      |
|                    | .                  | .                  | .                  | . | .      |
| Vv08g0772          | .                  | .                  | .                  | . | .      |
|                    | .                  | .                  | .                  | . | .      |
|                    | .                  | .                  | .                  | . | .      |
| Vv08g0773          | Tc05_g006490       | .                  | Gorai.002G248300.1 | . | .      |
|                    | Gorai.009G417300.1 | .                  | Vv06g0317          | . | .      |
| Tc09_g033590       | .                  | .                  | Gorai.009G108400.1 | . | .      |
| Gorai.003G143200.1 | .                  | .                  | .                  | . | .      |
|                    | .                  | .                  | .                  | . | .      |
| Vv08g0774          | Tc05_g006480       | .                  | .                  | . | .      |
|                    | .                  | .                  | .                  | . | .      |
|                    | .                  | .                  | .                  | . | .      |
| Vv08g0775          | Tc05_g006470       | .                  | .                  | . | Gorai. |
| 009G417400.1       | .                  | .                  | .                  | . | .      |
|                    | Vv13g0684          | Tc10_g005650       | Gorai.013G027500.1 | . | .      |
|                    | Gorai.011G238600.1 | .                  | .                  | . | .      |
| Vv08g0776          | Tc05_g006450       | Gorai.006G166400.1 | .                  | . | .      |
|                    | Vv06g0326          | Tc09_g033510       | Gorai.             | . | .      |
| 013G267100.1       | .                  | Gorai.009G107800.1 | Gorai.             | . | .      |
| 006G120400.1       | Vv13g0680          | Tc10_g005610       | Gorai.             | . | .      |
| 011G238900.1       | .                  | Gorai.012G004800.1 | .                  | . | .      |
| Vv08g0777          | Tc05_g006440       | .                  | .                  | . | Gorai. |
| 009G417500.1       | Vv06g0330          | Tc09_g033480       | .                  | . | .      |
|                    | Gorai.009G107600.1 | Gorai.003G142300.1 | .                  | . | .      |
| Vv13g0676          | Gorai.013G027400.1 | .                  | .                  | . | .      |
|                    | .                  | .                  | .                  | . | .      |
| Vv08g0778          | Tc05_g006430       | Gorai.006G166500.1 | .                  | . | .      |
|                    | Gorai.009G417600.1 | .                  | .                  | . | .      |
|                    | .                  | .                  | .                  | . | .      |
|                    | .                  | .                  | .                  | . | .      |
| Vv08g0779          | .                  | .                  | .                  | . | .      |
|                    | .                  | .                  | .                  | . | .      |
|                    | .                  | .                  | .                  | . | .      |
| Vv08g0780          | Tc05_g006420       | Gorai.006G166600.1 | .                  | . | .      |
|                    | Gorai.009G417700.1 | Vv06g0335          | .                  | . | .      |
| Tc09_g033430       | .                  | Gorai.006G166600.1 | .                  | . | .      |
|                    | .                  | .                  | .                  | . | .      |
| Vv08g0781          | Tc05_g006410       | Gorai.006G166700.1 | .                  | . | .      |
|                    | .                  | .                  | .                  | . | .      |
|                    | Vv13g0672          | Gorai.013G027300.1 | .                  | . | .      |
|                    | .                  | .                  | .                  | . | .      |
| Vv08g0782          | Tc05_g006380       | Gorai.006G166800.1 | Gorai.             | . | .      |
| 002G248400.1       | Gorai.009G418100.1 | .                  | Vv06g0337          | . | .      |
|                    | Tc09_g033410       | .                  | Gorai.009G107200.1 | . | .      |

|                    |                    |                    |                    |   |        |   |
|--------------------|--------------------|--------------------|--------------------|---|--------|---|
|                    | Gorai.006G166800.1 | .                  | .                  | . | .      | . |
| Vv08g0783          | .                  | .                  | .                  | . | .      | . |
| Vv08g0784          | Tc05_g006360       | .                  | .                  | . | Gorai. | . |
| 009G418200.1       | .                  | .                  | .                  | . | .      | . |
| Vv08g0785          | Tc05_g006280       | Gorai.006G167000.1 | .                  | . | .      | . |
| Vv08g0786          | Tc05_g006270       | Gorai.006G167100.1 | .                  | . | .      | . |
| Vv08g0787          | Tc05_g006250       | Gorai.006G167300.1 | .                  | . | .      | . |
|                    | Gorai.009G418300.1 | Gorai.007G374000.1 | Vv06g0351          | . | .      | . |
|                    | .                  | .                  | Gorai.006G167300.1 | . | .      | . |
| Vv08g0788          | Tc05_g006230       | Gorai.002G248600.1 | .                  | . | .      | . |
| Vv08g0789          | Gorai.006G167400.1 | .                  | .                  | . | .      | . |
| Gorai.009G418400.1 | .                  | .                  | .                  | . | .      | . |
| Vv08g0790          | Tc05_g006220       | .                  | .                  | . | .      | . |
| Vv08g0791          | .                  | .                  | .                  | . | Gorai. | . |
| 007G374100.1       | .                  | .                  | .                  | . | .      | . |
| Vv08g0792          | Tc05_g006210       | .                  | .                  | . | .      | . |
| Vv08g0793          | .                  | .                  | .                  | . | .      | . |
| Vv08g0794          | .                  | .                  | .                  | . | .      | . |
| Vv08g0795          | Tc05_g006200       | Gorai.006G167500.1 | Gorai.             | . | .      | . |
| 002G248700.1       | .                  | .                  | .                  | . | .      | . |
| Vv08g0796          | Tc05_g006190       | Gorai.006G167600.1 | .                  | . | .      | . |
|                    | Gorai.009G418600.1 | Vv06g0362          | .                  | . | .      | . |
| Tc09_g025680       | Gorai.001G131000.1 | .                  | .                  | . | .      | . |
| Gorai.006G167600.1 | .                  | .                  | .                  | . | .      | . |
| Vv08g0797          | Tc05_g006180       | .                  | .                  | . | .      | . |



|                    |                    |                    |           |                    |                    |   |   |
|--------------------|--------------------|--------------------|-----------|--------------------|--------------------|---|---|
| .                  | .                  | .                  | .         | .                  | .                  | . | . |
| .                  | .                  | .                  | .         | .                  | .                  | . | . |
| Vv08g0798          | .                  | .                  | .         | .                  | .                  | . | . |
| .                  | .                  | .                  | .         | .                  | .                  | . | . |
| .                  | .                  | .                  | .         | .                  | .                  | . | . |
| Vv08g0799          | Tc05_g006170       | .                  | .         | Gorai.002G248800.1 | .                  | . | . |
|                    | Gorai.009G418800.1 | .                  | .         | Vv06g0364          | .                  | . | . |
| Tc09_g025710       | .                  | .                  | .         | .                  | Gorai.006G120200.1 | . | . |
| .                  | .                  | .                  | .         | .                  | .                  | . | . |
| Vv08g0800          | .                  | .                  | .         | .                  | .                  | . | . |
| .                  | .                  | .                  | .         | .                  | .                  | . | . |
| .                  | .                  | .                  | .         | .                  | .                  | . | . |
| Vv08g0801          | .                  | .                  | .         | .                  | .                  | . | . |
| .                  | .                  | .                  | .         | .                  | .                  | . | . |
| .                  | .                  | .                  | .         | .                  | .                  | . | . |
| Vv08g0802          | Tc05_g006160       | .                  | .         | Gorai.006G167700.1 | .                  | . | . |
| .                  | .                  | .                  | .         | .                  | .                  | . | . |
| .                  | .                  | .                  | .         | .                  | .                  | . | . |
| Vv08g0803          | .                  | .                  | .         | .                  | .                  | . | . |
| .                  | .                  | .                  | .         | .                  | .                  | . | . |
| .                  | .                  | .                  | .         | .                  | .                  | . | . |
| Vv08g0804          | Tc05_g006150       | .                  | .         | .                  | .                  | . | . |
|                    | Vv06g0366          | Tc09_g025760       | .         | .                  | .                  | . | . |
| Gorai.009G078600.1 | .                  | .                  | Vv13g0646 | Tc10_g005220       | .                  | . | . |
|                    | Gorai.011G240700.1 | .                  | .         | Gorai.010G205100.1 | .                  | . | . |
| Gorai.012G004100.1 | .                  | .                  | .         | .                  | .                  | . | . |
| Vv08g0805          | Tc05_g006140       | .                  | .         | .                  | .                  | . | . |
|                    | Vv06g0367          | .                  | .         | Gorai.001G130800.1 | .                  | . | . |
|                    | Gorai.009G078700.1 | .                  | .         | Vv13g0644          | .                  | . | . |
|                    | .                  | Gorai.010G205000.1 | .         | .                  | .                  | . | . |
| Vv08g0806          | Tc05_g006130       | .                  | .         | Gorai.006G167900.1 | .                  | . | . |
|                    | Gorai.009G419000.1 | .                  | .         | .                  | .                  | . | . |
| .                  | .                  | .                  | .         | .                  | .                  | . | . |
| .                  | .                  | .                  | .         | .                  | .                  | . | . |
| Vv08g0807          | Tc05_g006120       | .                  | .         | .                  | .                  | . | . |
| .                  | .                  | .                  | .         | .                  | .                  | . | . |
| .                  | .                  | .                  | .         | .                  | .                  | . | . |
| Vv08g0808          | Tc05_g006110       | .                  | .         | Gorai.002G249200.1 | .                  | . | . |
| .                  | .                  | .                  | .         | .                  | .                  | . | . |
| .                  | .                  | .                  | .         | .                  | .                  | . | . |
| Vv08g0809          | .                  | .                  | .         | .                  | .                  | . | . |
| Vv06g0371          | .                  | .                  | .         | .                  | .                  | . | . |
| .                  | .                  | .                  | .         | .                  | .                  | . | . |
| Vv08g0810          | .                  | .                  | .         | .                  | .                  | . | . |
| .                  | .                  | .                  | .         | .                  | .                  | . | . |
| .                  | .                  | .                  | .         | .                  | .                  | . | . |
| Vv08g0811          | .                  | .                  | .         | .                  | .                  | . | . |
| .                  | .                  | .                  | .         | .                  | .                  | . | . |
| .                  | .                  | .                  | .         | .                  | .                  | . | . |
| Vv08g0812          | .                  | .                  | .         | .                  | .                  | . | . |



|              |                    |                    |              |
|--------------|--------------------|--------------------|--------------|
| Vv08g0828    | Tc05_g005990       | Gorai.006G168400.1 | Gorai.       |
| 002G249700.1 | .                  | .                  | .            |
| .            | .                  | Vv13g0627          | Tc10_g005040 |
| .            | Gorai.009G314900.1 | Gorai.010G204200.1 | .            |
| Vv08g0829    | Tc05_g005980       | Gorai.002G249800.1 | .            |
| .            | .                  | .                  | .            |
| .            | .                  | .                  | .            |
| Vv08g0830    | Tc05_g005970       | .                  | .            |
| Vv06g0391    | .                  | Gorai.001G130100.1 | .            |
| .            | Gorai.006G111500.1 | .                  | .            |
| .            | .                  | .                  | .            |
| Vv08g0831    | .                  | .                  | .            |
| .            | .                  | .                  | .            |
| .            | .                  | .                  | .            |
| Vv08g0832    | .                  | .                  | .            |
| .            | .                  | .                  | .            |
| .            | .                  | .                  | .            |
| Vv08g0833    | .                  | .                  | .            |
| .            | .                  | .                  | .            |
| .            | .                  | .                  | .            |
| Vv08g0834    | .                  | .                  | .            |
| .            | .                  | .                  | .            |
| .            | .                  | .                  | .            |
| Vv08g0835    | Tc05_g005930       | Gorai.006G168700.1 | Gorai.       |
| 002G250200.1 | .                  | .                  | .            |
| .            | .                  | .                  | .            |
| .            | .                  | .                  | .            |
| Vv08g0836    | Tc05_g005910       | Gorai.006G168800.1 | Gorai.       |
| 002G250300.1 | .                  | Gorai.007G374500.1 | Vv06g0408    |
| .            | Gorai.001G129300.1 | .                  | .            |
| .            | .                  | .                  | .            |
| Vv08g0837    | .                  | Gorai.002G250400.1 | .            |
| .            | .                  | .                  | .            |
| .            | .                  | .                  | .            |
| Vv08g0838    | .                  | .                  | .            |
| .            | .                  | .                  | .            |
| .            | .                  | .                  | .            |
| Vv08g0839    | .                  | .                  | .            |
| .            | .                  | .                  | .            |
| .            | .                  | .                  | .            |
| Vv08g0840    | .                  | .                  | .            |
| .            | .                  | .                  | .            |
| .            | .                  | .                  | .            |
| Vv08g0841    | .                  | .                  | .            |
| .            | .                  | .                  | .            |
| .            | .                  | .                  | .            |
| Vv08g0842    | Tc05_g031510       | .                  | .            |
| .            | .                  | .                  | .            |
| .            | .                  | .                  | .            |
| Vv08g0843    | .                  | .                  | .            |

|              |                    |   |   |   |           |
|--------------|--------------------|---|---|---|-----------|
| Vv06g0488    | Tc09_g032210       | . | . | . | Gorai.    |
| 009G101500.1 | .                  | . | . | . | .         |
| .            | .                  | . | . | . | .         |
| Vv08g0844    | .                  | . | . | . | .         |
| .            | .                  | . | . | . | .         |
| Vv08g0845    | .                  | . | . | . | .         |
| .            | .                  | . | . | . | .         |
| Vv08g0846    | .                  | . | . | . | .         |
| .            | .                  | . | . | . | .         |
| Vv08g0847    | .                  | . | . | . | .         |
| .            | .                  | . | . | . | .         |
| Vv08g0848    | .                  | . | . | . | .         |
| .            | .                  | . | . | . | .         |
| Vv08g0849    | .                  | . | . | . | .         |
| .            | .                  | . | . | . | .         |
| Vv08g0850    | .                  | . | . | . | .         |
| .            | .                  | . | . | . | .         |
| Vv08g0851    | .                  | . | . | . | .         |
| Vv06g0444    | Tc09_g032740       | . | . | . | Gorai.    |
| 009G103300.1 | Gorai.003G138600.1 | . | . | . | .         |
| .            | .                  | . | . | . | .         |
| Vv08g0852    | .                  | . | . | . | .         |
| .            | .                  | . | . | . | .         |
| Vv08g0853    | Tc05_g008930       | . | . | . | .         |
| .            | .                  | . | . | . | .         |
| Vv08g0854    | .                  | . | . | . | .         |
| .            | .                  | . | . | . | .         |
| Vv08g0855    | Tc05_g031590       | . | . | . | .         |
| .            | .                  | . | . | . | .         |
| Vv08g0856    | .                  | . | . | . | .         |
| .            | .                  | . | . | . | .         |
| Vv08g0857    | .                  | . | . | . | Vv13g0595 |
| .            | .                  | . | . | . | .         |
| Vv08g0858    | .                  | . | . | . | .         |
| .            | .                  | . | . | . | .         |
| Vv08g0859    | .                  | . | . | . | .         |

|                    |                    |                    |                    |                    |           |
|--------------------|--------------------|--------------------|--------------------|--------------------|-----------|
| .                  | .                  | .                  | .                  | .                  | Vv13g0293 |
| .                  | .                  | Gorai.011G246100.1 | .                  | Gorai.009G316900.1 | .         |
| Vv08g0860          | .                  | .                  | .                  | .                  | .         |
| .                  | .                  | .                  | .                  | .                  | .         |
| Vv08g0861          | .                  | .                  | .                  | .                  | .         |
| Vv06g0467          | Tc09_g032390       | .                  | Gorai.001G107500.1 | .                  | .         |
|                    | Gorai.009G102100.1 | Gorai.003G137300.1 | .                  | .                  | .         |
| Vv08g0862          | Tc05_g027430       | .                  | .                  | .                  | .         |
| .                  | .                  | .                  | .                  | .                  | .         |
| Vv08g0863          | .                  | .                  | .                  | .                  | .         |
| .                  | .                  | .                  | .                  | .                  | .         |
| Vv08g0864          | .                  | .                  | .                  | Gorai.009G419700.1 | .         |
| .                  | .                  | .                  | .                  | .                  | .         |
| Vv08g0865          | .                  | .                  | .                  | .                  | .         |
| Vv06g0465          | Tc09_g032410       | .                  | Gorai.001G107400.1 | .                  | .         |
|                    | Gorai.009G102200.1 | Gorai.003G137500.1 | Gorai.009G316600.1 | Vv13g0287          | .         |
| Vv08g0866          | .                  | .                  | .                  | .                  | .         |
| .                  | .                  | .                  | .                  | Vv13g0286          | .         |
| Vv08g0867          | .                  | .                  | .                  | .                  | .         |
| .                  | .                  | .                  | .                  | .                  | .         |
| Vv08g0868          | .                  | .                  | .                  | .                  | .         |
| .                  | .                  | .                  | .                  | .                  | .         |
| Vv08g0869          | Tc05_g027130       | .                  | .                  | .                  | .         |
| .                  | .                  | .                  | .                  | .                  | .         |
| Vv08g0870          | .                  | .                  | .                  | .                  | .         |
| .                  | .                  | .                  | .                  | .                  | Vv13g0282 |
| .                  | .                  | Gorai.011G245000.1 | .                  | Gorai.009G316400.1 | .         |
| .                  | Gorai.012G067600.1 | .                  | .                  | .                  | .         |
| Vv08g0871          | .                  | .                  | .                  | .                  | Vv13g0281 |
| .                  | .                  | Gorai.011G244900.1 | .                  | .                  | .         |
| Gorai.012G067500.1 | .                  | .                  | .                  | .                  | .         |
| Vv08g0872          | .                  | .                  | .                  | .                  | .         |
| .                  | .                  | .                  | .                  | .                  | .         |
| Vv08g0873          | .                  | .                  | .                  | .                  | Vv13g0228 |
| .                  | .                  | .                  | .                  | .                  | .         |
| .                  | Gorai.013G002900.1 | .                  | .                  | .                  | .         |
| Vv08g0874          | .                  | .                  | .                  | .                  | .         |

|                    |                    |   |                    |                    |   |
|--------------------|--------------------|---|--------------------|--------------------|---|
| Vv06g0452          | Tc09_g032540       | . | Gorai.001G106900.1 | .                  | . |
| Gorai.004G003100.1 | .                  | . | Gorai.003G137800.1 | .                  | . |
| .                  | .                  | . | .                  | .                  | . |
| Vv08g0875          | .                  | . | .                  | .                  | . |
| .                  | .                  | . | .                  | .                  | . |
| .                  | .                  | . | .                  | .                  | . |
| Vv08g0876          | Tc05_g031680       | . | .                  | .                  | . |
| .                  | .                  | . | .                  | .                  | . |
| .                  | .                  | . | .                  | .                  | . |
| Vv08g0877          | .                  | . | .                  | .                  | . |
| .                  | .                  | . | .                  | .                  | . |
| .                  | .                  | . | .                  | .                  | . |
| Vv08g0878          | .                  | . | .                  | .                  | . |
| .                  | .                  | . | .                  | .                  | . |
| .                  | .                  | . | .                  | .                  | . |
| Vv08g0879          | .                  | . | Gorai.002G252200.1 | .                  | . |
| .                  | .                  | . | .                  | .                  | . |
| .                  | .                  | . | .                  | .                  | . |
| Vv08g0880          | .                  | . | .                  | .                  | . |
| .                  | .                  | . | .                  | .                  | . |
| .                  | .                  | . | .                  | .                  | . |
| Vv08g0881          | .                  | . | .                  | .                  | . |
| .                  | .                  | . | .                  | .                  | . |
| .                  | .                  | . | .                  | .                  | . |
| Vv08g0882          | .                  | . | .                  | .                  | . |
| .                  | .                  | . | .                  | .                  | . |
| .                  | .                  | . | .                  | .                  | . |
| Vv08g0883          | Tc05_g031810       | . | .                  | .                  | . |
| .                  | .                  | . | .                  | .                  | . |
| .                  | .                  | . | .                  | .                  | . |
| Vv08g0884          | .                  | . | .                  | .                  | . |
| .                  | .                  | . | .                  | .                  | . |
| .                  | .                  | . | .                  | .                  | . |
| Vv08g0885          | .                  | . | .                  | .                  | . |
| .                  | .                  | . | .                  | .                  | . |
| .                  | .                  | . | .                  | .                  | . |
| Vv08g0886          | .                  | . | .                  | Gorai.012G100800.1 | . |
| .                  | .                  | . | .                  | .                  | . |
| .                  | .                  | . | .                  | .                  | . |
| Vv13g0260          | Tc10_g004570       | . | Gorai.011G242300.1 | .                  | . |
| .                  | Gorai.010G203500.1 | . | .                  | .                  | . |
| Vv08g0887          | .                  | . | .                  | .                  | . |
| .                  | .                  | . | .                  | .                  | . |
| .                  | .                  | . | .                  | .                  | . |
| Vv08g0888          | Tc05_g009390       | . | .                  | .                  | . |
| .                  | .                  | . | .                  | .                  | . |
| .                  | .                  | . | .                  | .                  | . |
| Vv08g0889          | .                  | . | .                  | .                  | . |
| .                  | .                  | . | .                  | .                  | . |
| .                  | .                  | . | .                  | .                  | . |
| Vv08g0890          | .                  | . | .                  | .                  | . |

|                    |                    |                    |   |                    |   |   |   |
|--------------------|--------------------|--------------------|---|--------------------|---|---|---|
| .                  | .                  | .                  | . | .                  | . | . | . |
| .                  | .                  | .                  | . | .                  | . | . | . |
| Vv08g0891          | .                  | Gorai.006G177600.1 | . | Gorai.002G252300.1 | . | . | . |
| .                  | .                  | Vv06g0432          | . | .                  | . | . | . |
| .                  | .                  | Vv13g0294          | . | .                  | . | . | . |
| Gorai.011G246200.1 | .                  | .                  | . | .                  | . | . | . |
| Vv08g0892          | .                  | .                  | . | .                  | . | . | . |
| .                  | .                  | .                  | . | .                  | . | . | . |
| Vv08g0893          | .                  | .                  | . | .                  | . | . | . |
| .                  | .                  | .                  | . | .                  | . | . | . |
| Vv08g0894          | Tc05_g027100       | .                  | . | .                  | . | . | . |
| .                  | .                  | .                  | . | .                  | . | . | . |
| Vv08g0895          | .                  | .                  | . | .                  | . | . | . |
| .                  | .                  | .                  | . | .                  | . | . | . |
| Vv08g0896          | .                  | .                  | . | .                  | . | . | . |
| .                  | .                  | .                  | . | .                  | . | . | . |
| Vv08g0897          | .                  | .                  | . | .                  | . | . | . |
| .                  | .                  | .                  | . | .                  | . | . | . |
| Vv08g0898          | .                  | .                  | . | .                  | . | . | . |
| .                  | .                  | .                  | . | .                  | . | . | . |
| Vv08g0899          | Tc05_g026640       | .                  | . | .                  | . | . | . |
| .                  | Vv06g0429          | Tc09_g032930       | . | .                  | . | . | . |
| Gorai.009G103700.1 | .                  | .                  | . | .                  | . | . | . |
| .                  | .                  | .                  | . | .                  | . | . | . |
| Vv08g0900          | .                  | .                  | . | .                  | . | . | . |
| .                  | .                  | .                  | . | .                  | . | . | . |
| Vv08g0901          | .                  | .                  | . | .                  | . | . | . |
| .                  | .                  | .                  | . | .                  | . | . | . |
| Vv08g0902          | .                  | .                  | . | Gorai.009G420500.1 | . | . | . |
| .                  | .                  | .                  | . | .                  | . | . | . |
| Vv08g0903          | .                  | .                  | . | .                  | . | . | . |
| Vv06g0419          | Tc09_g033000       | Gorai.013G266000.1 | . | Gorai.             | . | . | . |
| 001G105300.1       | Gorai.004G002000.1 | Gorai.009G104400.1 | . | .                  | . | . | . |
| .                  | .                  | .                  | . | .                  | . | . | . |
| Vv08g0904          | .                  | .                  | . | .                  | . | . | . |
| .                  | .                  | .                  | . | .                  | . | . | . |
| Vv08g0905          | .                  | .                  | . | .                  | . | . | . |
| .                  | .                  | .                  | . | .                  | . | . | . |
| .                  | .                  | .                  | . | .                  | . | . | . |

|           |                    |   |   |   |                    |   |
|-----------|--------------------|---|---|---|--------------------|---|
| Vv08g0906 | .                  | . | . | . | Gorai.009G420600.1 | . |
|           | Gorai.007G374700.1 | . | . | . | .                  | . |
| .         | .                  | . | . | . | .                  | . |
| Vv08g0907 | .                  | . | . | . | .                  | . |
| .         | .                  | . | . | . | .                  | . |
| Vv08g0908 | .                  | . | . | . | .                  | . |
| .         | .                  | . | . | . | .                  | . |
| Vv08g0909 | .                  | . | . | . | .                  | . |
| .         | .                  | . | . | . | .                  | . |
| Vv08g0910 | .                  | . | . | . | Gorai.009G420700.1 | . |
| .         | .                  | . | . | . | .                  | . |
| Vv08g0911 | .                  | . | . | . | .                  | . |
| .         | .                  | . | . | . | .                  | . |
| Vv08g0912 | .                  | . | . | . | Gorai.009G420900.1 | . |
| .         | .                  | . | . | . | .                  | . |
| Vv08g0913 | .                  | . | . | . | .                  | . |
| .         | .                  | . | . | . | .                  | . |
| Vv08g0914 | .                  | . | . | . | .                  | . |
| .         | .                  | . | . | . | .                  | . |
| Vv08g0915 | .                  | . | . | . | .                  | . |
| .         | .                  | . | . | . | .                  | . |
| Vv08g0916 | .                  | . | . | . | .                  | . |
| .         | .                  | . | . | . | .                  | . |
| Vv08g0917 | .                  | . | . | . | .                  | . |
| .         | .                  | . | . | . | .                  | . |
| Vv08g0918 | Tc05_g005040       | . | . | . | Gorai.002G254100.1 | . |
| .         | .                  | . | . | . | .                  | . |
| Vv08g0919 | .                  | . | . | . | .                  | . |
| .         | .                  | . | . | . | .                  | . |
| Vv08g0920 | .                  | . | . | . | .                  | . |
| .         | .                  | . | . | . | .                  | . |
| Vv08g0921 | Tc05_g005020       | . | . | . | Gorai.006G175100.1 | . |
| .         | .                  | . | . | . | .                  | . |
| Vv08g0922 | Tc05_g005010       | . | . | . | Gorai.002G254200.1 | . |



|              |                    |                    |                    |   |        |   |
|--------------|--------------------|--------------------|--------------------|---|--------|---|
|              | Gorai.012G101600.1 | .                  | .                  | . | .      | . |
|              | .                  | .                  | .                  | . | .      | . |
|              | .                  | .                  | .                  | . | .      | . |
| Vv08g0923    | Tc05_g005000       | Gorai.006G175000.1 | Gorai.             |   |        |   |
| 002G254400.1 | .                  | Vv06g0488          |                    |   |        |   |
| Tc09_g032210 | .                  | Gorai.009G101500.1 | .                  |   |        |   |
|              | Vv13g0327          | Tc10_g003840       | Gorai.013G023200.1 | . |        |   |
|              | Gorai.009G318200.1 | .                  | .                  |   |        |   |
| Vv08g0924    | .                  | .                  | .                  | . | .      | . |
|              | .                  | .                  | .                  | . | .      | . |
|              | .                  | .                  | .                  | . | .      | . |
| Vv08g0925    | Tc05_g004990       | Gorai.002G254800.1 | .                  |   |        |   |
| .            | Vv06g0496          | Tc09_g032130       | Gorai.             |   |        |   |
| 013G264800.1 | .                  | Gorai.003G135600.1 | .                  |   |        |   |
| Vv13g0333    | Tc10_g003700       | Gorai.013G022900.1 | .                  |   |        |   |
| .            | Gorai.012G069600.1 | .                  | .                  |   |        |   |
| Vv08g0926    | Tc05_g004980       | .                  | .                  | . | Gorai. | . |
| 012G101800.1 | .                  | .                  | .                  | . | .      | . |
|              | .                  | .                  | .                  | . | .      | . |
| Vv08g0927    | Tc05_g004970       | Gorai.006G174800.1 | .                  |   |        |   |
| .            | .                  | .                  | .                  | . | .      | . |
|              | .                  | .                  | .                  | . | .      | . |
| Vv08g0928    | Tc05_g004950       | Gorai.006G174600.1 | .                  |   |        |   |
|              | Gorai.012G101900.1 | .                  | .                  | . | .      | . |
|              | .                  | .                  | .                  | . | .      | . |
|              | .                  | .                  | .                  | . | .      | . |
| Vv08g0929    | Tc05_g004930       | Gorai.006G174500.1 | Gorai.             |   |        |   |
| 002G255000.1 | Gorai.012G102200.1 | .                  | .                  | . | .      | . |
|              | .                  | .                  | .                  | . | .      | . |
|              | .                  | .                  | .                  | . | .      | . |
| Vv08g0930    | Tc05_g004920       | .                  | .                  | . | .      | . |
| .            | .                  | .                  | .                  | . | .      | . |
|              | .                  | .                  | .                  | . | .      | . |
| Vv08g0931    | .                  | .                  | .                  | . | .      | . |
| .            | .                  | .                  | .                  | . | .      | . |
|              | .                  | .                  | .                  | . | .      | . |
| Vv08g0932    | Tc05_g004910       | Gorai.002G255100.1 | .                  |   |        |   |
|              | Gorai.012G102300.1 | .                  | .                  | . | .      | . |
|              | .                  | .                  | .                  | . | .      | . |
|              | .                  | .                  | .                  | . | .      | . |
| Vv08g0933    | Tc05_g004900       | .                  | .                  | . | .      | . |
| .            | .                  | .                  | .                  | . | .      | . |
|              | .                  | .                  | .                  | . | .      | . |
| Vv08g0934    | Tc05_g004880       | Gorai.002G255200.1 | .                  |   |        |   |
|              | Gorai.012G102800.1 | Vv06g0507          | .                  |   |        |   |
| Tc09_g032050 | Gorai.013G264400.1 | Gorai.004G004600.1 | .                  |   |        |   |
| .            | Gorai.003G134900.1 | Vv13g0347          | .                  |   |        |   |
|              | .                  | .                  | .                  | . | .      | . |
| Vv08g0935    | .                  | .                  | .                  | . | .      | . |
| .            | .                  | .                  | .                  | . | .      | . |

|                    |                    |                    |                    |                    |   |   |   |
|--------------------|--------------------|--------------------|--------------------|--------------------|---|---|---|
| Vv08g0936          | .                  | .                  | .                  | .                  | . | . | . |
| .                  | .                  | .                  | .                  | .                  | . | . | . |
| Vv08g0937          | .                  | .                  | .                  | .                  | . | . | . |
| .                  | .                  | .                  | .                  | .                  | . | . | . |
| Vv08g0938          | Tc05_g004840       | .                  | .                  | Gorai.002G255300.1 | . | . | . |
| .                  | .                  | .                  | .                  | .                  | . | . | . |
| Vv08g0939          | .                  | Gorai.006G174300.1 | .                  | .                  | . | . | . |
| .                  | .                  | .                  | .                  | .                  | . | . | . |
| Vv08g0940          | .                  | .                  | .                  | .                  | . | . | . |
| .                  | .                  | .                  | .                  | .                  | . | . | . |
| Vv08g0941          | Tc05_g004820       | .                  | .                  | Gorai.002G258600.1 | . | . | . |
| .                  | .                  | Vv06g0510          | .                  | Tc09_g032020       | . | . | . |
| Gorai.001G108600.1 | .                  | .                  | .                  | .                  | . | . | . |
| Vv08g0942          | Tc05_g004800       | Gorai.006G174100.1 | .                  | .                  | . | . | . |
| .                  | .                  | .                  | .                  | .                  | . | . | . |
| Vv08g0943          | .                  | .                  | .                  | .                  | . | . | . |
| Vv06g0513          | Tc09_g031990       | Gorai.013G264300.1 | Gorai.             | .                  | . | . | . |
| 001G108800.1       | .                  | Gorai.009G100700.1 | Gorai.003G134400.1 | .                  | . | . | . |
| Vv13g0356          | Tc10_g003480       | .                  | .                  | .                  | . | . | . |
| .                  | .                  | .                  | .                  | .                  | . | . | . |
| Vv08g0944          | Tc05_g004790       | Gorai.006G174000.1 | Gorai.             | .                  | . | . | . |
| 002G258500.1       | .                  | Gorai.007G375600.1 | Vv06g0516          | .                  | . | . | . |
| Tc09_g031960       | .                  | .                  | Gorai.009G100400.1 | .                  | . | . | . |
| Gorai.003G133700.1 | .                  | Vv13g0357          | Tc10_g003470       | .                  | . | . | . |
| Gorai.011G256600.1 | .                  | .                  | Gorai.010G202100.1 | .                  | . | . | . |
| Vv08g0945          | Tc05_g004780       | .                  | Gorai.002G258400.1 | .                  | . | . | . |
| Gorai.012G103100.1 | .                  | .                  | Vv06g0517          | .                  | . | . | . |
| Tc09_g031950       | .                  | .                  | Gorai.009G100300.1 | .                  | . | . | . |
| Vv13g0358          | Tc10_g003460       | .                  | .                  | Gorai.             | . | . | . |
| 009G319000.1       | .                  | .                  | .                  | .                  | . | . | . |
| Vv08g0946          | Tc05_g004770       | Gorai.006G173800.1 | .                  | .                  | . | . | . |
| Gorai.012G103200.1 | .                  | .                  | .                  | .                  | . | . | . |
| .                  | .                  | .                  | .                  | .                  | . | . | . |
| .                  | .                  | .                  | .                  | .                  | . | . | . |
| Vv08g0947          | Tc05_g004750       | .                  | .                  | Gorai.             | . | . | . |
| 012G103300.1       | Gorai.007G375700.1 | .                  | .                  | .                  | . | . | . |
| .                  | .                  | .                  | .                  | .                  | . | . | . |
| .                  | .                  | .                  | .                  | .                  | . | . | . |
| Vv08g0948          | Tc05_g004740       | .                  | .                  | .                  | . | . | . |
| Gorai.007G375800.1 | .                  | .                  | .                  | .                  | . | . | . |
| .                  | .                  | .                  | .                  | .                  | . | . | . |
| Vv08g0949          | Tc05_g004730       | Gorai.006G173700.1 | .                  | .                  | . | . | . |

|                    |                    |                    |                    |   |
|--------------------|--------------------|--------------------|--------------------|---|
|                    | Gorai.012G103400.1 | .                  | Vv06g0524          |   |
| Tc09_g031890       | .                  | Gorai.001G109300.1 | Gorai.004G004800.1 |   |
|                    | Gorai.009G100100.1 | Gorai.003G133200.1 | Vv13g0381          |   |
| .                  | Gorai.013G022500.1 | .                  | Gorai.009G319300.1 |   |
| .                  | .                  | .                  | .                  | . |
| Vv08g0950          | .                  | .                  | .                  | . |
| .                  | .                  | .                  | .                  | . |
| .                  | .                  | .                  | .                  | . |
| Vv08g0951          | Tc05_g004690       | Gorai.006G173500.1 | .                  | . |
| .                  | .                  | .                  | .                  | . |
| .                  | .                  | .                  | .                  | . |
| Vv08g0952          | Tc05_g004680       | .                  | .                  | . |
|                    | Vv06g0530          | Tc09_g031830       | Gorai.001G110200.1 | . |
| .                  | Gorai.009G099700.1 | .                  | .                  | . |
| .                  | .                  | .                  | .                  | . |
| Vv08g0953          | Tc05_g004670       | Gorai.006G173400.1 | .                  | . |
| .                  | .                  | .                  | .                  | . |
| .                  | .                  | .                  | .                  | . |
| Vv08g0954          | Tc05_g004650       | Gorai.006G173300.1 | Gorai.             | . |
| 002G258100.1       | .                  | .                  | .                  | . |
| .                  | .                  | .                  | .                  | . |
| .                  | .                  | .                  | .                  | . |
| Vv08g0955          | .                  | .                  | .                  | . |
| .                  | .                  | .                  | .                  | . |
| .                  | .                  | .                  | .                  | . |
| Vv08g0956          | Tc05_g004620       | Gorai.006G173000.1 | .                  | . |
| .                  | .                  | .                  | .                  | . |
| .                  | .                  | .                  | .                  | . |
| Vv08g0957          | Tc05_g004610       | .                  | Gorai.002G257800.1 | . |
|                    | Gorai.012G103700.1 | .                  | .                  | . |
| .                  | .                  | .                  | .                  | . |
| .                  | .                  | .                  | .                  | . |
| Vv08g0958          | Tc05_g004600       | Gorai.006G172900.1 | .                  | . |
|                    | Gorai.009G421600.1 | .                  | Vv06g0534          | . |
| Tc09_g031780       | .                  | .                  | Gorai.009G099400.1 | . |
| Gorai.003G132200.1 | .                  | .                  | .                  | . |
| .                  | .                  | .                  | .                  | . |
| Vv08g0959          | Tc05_g004590       | .                  | .                  | . |
| Gorai.007G375900.1 | Vv06g0536          | Tc09_g031760       | .                  | . |
| .                  | Gorai.009G099300.1 | Gorai.003G132000.1 | .                  | . |
| .                  | .                  | .                  | .                  | . |
| Vv08g0960          | Tc05_g004580       | .                  | Gorai.002G257700.1 | . |
| .                  | Gorai.007G376000.1 | .                  | Vv06g0538          | . |
| .                  | .                  | .                  | .                  | . |
| .                  | .                  | .                  | .                  | . |
| Vv08g0961          | Tc05_g004570       | .                  | .                  | . |
| .                  | .                  | .                  | .                  | . |
| .                  | .                  | .                  | .                  | . |
| Vv08g0962          | .                  | .                  | .                  | . |
| Vv06g0552          | Tc09_g031700       | Gorai.013G263900.1 | .                  | . |

|                    |                    |                    |        |        |   |
|--------------------|--------------------|--------------------|--------|--------|---|
| .                  | Gorai.003G131900.1 | .                  | .      | .      | . |
| Vv08g0963          | Tc05_g004560       | Gorai.006G172800.1 | .      | .      | . |
| .                  | .                  | .                  | .      | .      | . |
| Vv08g0964          | Tc05_g004550       | Gorai.006G172700.1 | Gorai. | .      | . |
| 002G257600.1       | .                  | .                  | .      | .      | . |
| .                  | .                  | .                  | .      | .      | . |
| Vv08g0965          | Tc05_g004520       | .                  | .      | Gorai. | . |
| 012G104100.1       | .                  | .                  | .      | .      | . |
| .                  | .                  | .                  | .      | .      | . |
| Vv08g0966          | Tc05_g004510       | Gorai.006G172600.1 | Gorai. | .      | . |
| 002G257500.1       | Gorai.012G104300.1 | .                  | .      | .      | . |
| .                  | .                  | .                  | .      | .      | . |
| .                  | .                  | .                  | .      | .      | . |
| Vv08g0967          | Tc05_g004480       | Gorai.006G172400.1 | Gorai. | .      | . |
| 002G257400.1       | Gorai.012G104400.1 | Gorai.007G376300.1 | .      | .      | . |
| Vv06g0567          | Tc09_g031580       | Gorai.001G111100.1 | .      | .      | . |
| .                  | Gorai.009G098800.1 | Gorai.003G131000.1 | .      | .      | . |
| Vv13g0395          | Gorai.013G022200.1 | Gorai.011G266000.1 | .      | .      | . |
| .                  | .                  | .                  | .      | .      | . |
| Vv08g0968          | .                  | .                  | .      | .      | . |
| .                  | .                  | .                  | .      | .      | . |
| .                  | .                  | .                  | .      | .      | . |
| Vv08g0969          | Tc05_g004470       | Gorai.006G172300.1 | .      | .      | . |
| .                  | .                  | .                  | .      | .      | . |
| .                  | .                  | .                  | .      | .      | . |
| Vv08g0970          | Tc05_g004460       | Gorai.006G172200.1 | .      | .      | . |
| .                  | Vv06g0570          | Tc09_g031570       | .      | .      | . |
| .                  | Gorai.009G098700.1 | Gorai.003G130900.1 | .      | .      | . |
| .                  | .                  | .                  | .      | .      | . |
| Vv08g0971          | Tc05_g004450       | Gorai.006G172100.1 | .      | .      | . |
| .                  | Vv06g0574          | Tc09_g031530       | .      | .      | . |
| .                  | .                  | .                  | .      | .      | . |
| .                  | .                  | .                  | .      | .      | . |
| Vv08g0972          | .                  | .                  | .      | .      | . |
| .                  | .                  | .                  | .      | .      | . |
| .                  | .                  | .                  | .      | .      | . |
| Vv08g0973          | Tc05_g004440       | .                  | .      | .      | . |
| Vv06g0576          | Tc09_g031520       | .                  | .      | .      | . |
| Gorai.009G098300.1 | Gorai.003G130700.1 | Vv13g0396          | .      | .      | . |
| Gorai.013G021300.1 | Gorai.011G266100.1 | .                  | .      | .      | . |
| .                  | .                  | .                  | .      | .      | . |
| Vv08g0974          | Gorai.006G172000.1 | .                  | .      | .      | . |
| .                  | .                  | .                  | .      | .      | . |
| .                  | .                  | .                  | .      | .      | . |
| Vv08g0975          | Tc05_g004430       | .                  | .      | .      | . |
| Gorai.007G376400.1 | Vv06g0579          | Tc09_g031490       | .      | .      | . |
| Gorai.001G111600.1 | .                  | Vv13g0402          | .      | .      | . |

|                    |              |                    |           |   |   |   |   |
|--------------------|--------------|--------------------|-----------|---|---|---|---|
| Vv08g0976          | .            | .                  | .         | . | . | . | . |
| .                  | .            | .                  | .         | . | . | . | . |
| Vv08g0977          | Tc05_g004410 | Gorai.006G171900.1 | .         | . | . | . | . |
| .                  | .            | .                  | .         | . | . | . | . |
| Vv08g0978          | Tc05_g004400 | Gorai.002G257300.1 | .         | . | . | . | . |
| Gorai.012G104700.1 | .            | Gorai.007G376500.1 | Vv06g0583 | . | . | . | . |
| Tc09_g031440       | .            | Gorai.004G005300.1 | .         | . | . | . | . |
| Gorai.003G130000.1 | .            | .                  | .         | . | . | . | . |
| Vv08g0979          | Tc05_g004390 | Gorai.006G171800.1 | Gorai.    | . | . | . | . |
| 002G257200.1       | .            | .                  | .         | . | . | . | . |
| .                  | .            | .                  | .         | . | . | . | . |
| Vv08g0980          | Tc05_g004380 | Gorai.006G171700.1 | .         | . | . | . | . |
| Gorai.012G104800.1 | .            | .                  | .         | . | . | . | . |
| .                  | .            | .                  | .         | . | . | . | . |
| Vv08g0981          | Tc05_g004360 | Gorai.002G257100.1 | .         | . | . | . | . |
| Gorai.007G376600.1 | .            | .                  | .         | . | . | . | . |
| .                  | .            | .                  | .         | . | . | . | . |
| Vv08g0982          | .            | .                  | .         | . | . | . | . |
| .                  | .            | .                  | .         | . | . | . | . |
| Vv08g0983          | Tc05_g004340 | Gorai.002G257000.1 | .         | . | . | . | . |
| Gorai.007G376700.1 | .            | .                  | .         | . | . | . | . |
| .                  | .            | .                  | .         | . | . | . | . |
| Vv08g0984          | .            | .                  | .         | . | . | . | . |
| .                  | .            | .                  | .         | . | . | . | . |
| Vv08g0985          | Tc05_g004330 | .                  | .         | . | . | . | . |
| .                  | .            | .                  | .         | . | . | . | . |
| Vv08g0986          | Tc05_g004320 | Gorai.006G171500.1 | .         | . | . | . | . |
| Gorai.007G376800.1 | .            | .                  | .         | . | . | . | . |
| .                  | .            | .                  | .         | . | . | . | . |
| Vv08g0987          | Tc05_g004310 | .                  | .         | . | . | . | . |
| .                  | .            | .                  | .         | . | . | . | . |
| Vv08g0988          | .            | .                  | .         | . | . | . | . |
| .                  | .            | .                  | .         | . | . | . | . |
| Vv08g0989          | Tc05_g004300 | Gorai.006G171400.1 | .         | . | . | . | . |
| .                  | .            | .                  | .         | . | . | . | . |
| .                  | Vv13g0413    | Tc10_g002790       | Gorai.    | . | . | . | . |

|                    |              |                    |                    |        |
|--------------------|--------------|--------------------|--------------------|--------|
| 011G266900.1       | .            | Gorai.010G201200.1 | .                  | .      |
| Vv08g0990          | Tc05_g004280 | Gorai.006G171200.1 | .                  | .      |
| .                  | .            | .                  | .                  | .      |
| .                  | .            | .                  | .                  | .      |
| Vv08g0991          | Tc05_g004270 | Gorai.006G171100.1 | .                  | .      |
| Gorai.012G105100.1 | .            | .                  | .                  | .      |
| .                  | .            | .                  | .                  | .      |
| .                  | .            | .                  | .                  | .      |
| Vv08g0992          | .            | .                  | .                  | .      |
| .                  | .            | .                  | .                  | .      |
| .                  | .            | .                  | .                  | .      |
| Vv08g0993          | Tc05_g004260 | .                  | .                  | .      |
| .                  | .            | .                  | .                  | .      |
| .                  | .            | .                  | .                  | .      |
| Vv08g0994          | .            | .                  | Gorai.012G105200.1 | .      |
| .                  | .            | .                  | .                  | .      |
| .                  | .            | .                  | .                  | .      |
| Vv08g0995          | Tc05_g004250 | .                  | .                  | Gorai. |
| 012G105300.1       | .            | .                  | .                  | .      |
| .                  | .            | .                  | .                  | .      |
| Vv08g0996          | .            | .                  | .                  | .      |
| .                  | .            | .                  | .                  | .      |
| .                  | .            | .                  | .                  | .      |
| Vv08g0997          | Tc05_g004240 | .                  | .                  | Gorai. |
| 012G105400.1       | .            | .                  | .                  | .      |
| .                  | Vv13g0419    | .                  | .                  | .      |
| .                  | .            | .                  | .                  | .      |
| Vv08g0998          | Tc05_g004230 | .                  | .                  | .      |
| .                  | .            | .                  | .                  | .      |
| .                  | .            | .                  | .                  | .      |
| Vv08g0999          | Tc05_g004220 | .                  | .                  | .      |
| .                  | .            | .                  | .                  | .      |
| .                  | .            | .                  | .                  | .      |
| Vv08g1000          | .            | .                  | .                  | .      |
| .                  | .            | .                  | .                  | .      |
| .                  | .            | .                  | .                  | .      |
| Vv08g1001          | Tc05_g004200 | .                  | .                  | Gorai. |
| 012G105600.1       | .            | .                  | .                  | .      |
| .                  | .            | .                  | .                  | .      |
| Vv08g1002          | Tc05_g004140 | .                  | .                  | .      |
| .                  | .            | .                  | .                  | .      |
| .                  | .            | .                  | .                  | .      |
| Vv08g1003          | Tc05_g004100 | Gorai.006G171000.1 | .                  | Gorai. |
| 002G256700.1       | .            | .                  | .                  | .      |
| .                  | .            | .                  | .                  | .      |
| .                  | .            | .                  | .                  | .      |
| Vv08g1004          | Tc05_g004060 | .                  | .                  | Gorai. |
| 012G106000.1       | .            | Vv06g0603          | .                  | .      |
| .                  | .            | Vv13g0423          | .                  | Gorai. |
| 011G267600.1       | .            | Gorai.010G200600.1 | .                  | .      |

|              |                    |                    |                    |   |        |   |
|--------------|--------------------|--------------------|--------------------|---|--------|---|
| Vv08g1005    | Tc05_g004050       | .                  | .                  | . | .      | . |
| .            | .                  | .                  | .                  | . | .      | . |
| Vv08g1006    | Tc05_g004030       | .                  | Gorai.002G256600.1 | . | .      | . |
|              | Gorai.012G106200.1 | .                  | .                  | . | .      | . |
| .            | .                  | .                  | .                  | . | .      | . |
| Vv08g1007    | .                  | .                  | .                  | . | .      | . |
| .            | .                  | .                  | .                  | . | .      | . |
| Vv08g1008    | Tc05_g004020       | .                  | .                  | . | .      | . |
|              | Vv06g0610          | .                  | .                  | . | .      | . |
|              | Vv13g0431          | .                  | Gorai.011G268000.1 | . | .      | . |
| .            | .                  | .                  | .                  | . | .      | . |
| Vv08g1009    | Tc05_g004010       | .                  | .                  | . | Gorai. | . |
| 012G106300.1 | Gorai.007G377000.1 | .                  | .                  | . | .      | . |
| .            | .                  | .                  | .                  | . | .      | . |
| .            | .                  | .                  | .                  | . | .      | . |
| Vv08g1010    | .                  | Gorai.006G170900.1 | .                  | . | .      | . |
| .            | .                  | .                  | .                  | . | .      | . |
| Vv08g1011    | .                  | .                  | .                  | . | .      | . |
| .            | .                  | .                  | .                  | . | .      | . |
| Vv08g1012    | .                  | .                  | .                  | . | .      | . |
| .            | .                  | .                  | .                  | . | .      | . |
| Vv08g1013    | Tc05_g003990       | .                  | .                  | . | .      | . |
|              | Vv06g0615          | Tc09_g031150       | .                  | . | .      | . |
| .            | .                  | .                  | .                  | . | .      | . |
| Vv08g1014    | .                  | .                  | .                  | . | .      | . |
| Vv06g0621    | .                  | Gorai.013G262300.1 | .                  | . | .      | . |
| .            | .                  | .                  | .                  | . | .      | . |
| Vv08g1015    | Tc05_g003980       | .                  | .                  | . | .      | . |
| .            | .                  | .                  | .                  | . | .      | . |
| Vv08g1016    | Tc05_g003970       | Gorai.006G170800.1 | .                  | . | .      | . |
| .            | .                  | .                  | .                  | . | .      | . |
| Vv08g1017    | .                  | Gorai.002G256400.1 | .                  | . | .      | . |
| .            | .                  | .                  | .                  | . | .      | . |
| Vv08g1018    | Tc05_g003960       | .                  | Gorai.002G256300.1 | . | .      | . |
|              | Gorai.012G106400.1 | .                  | .                  | . | .      | . |
| .            | .                  | .                  | .                  | . | .      | . |
| Vv08g1019    | Tc05_g003950       | .                  | .                  | . | .      | . |
| .            | .                  | .                  | .                  | . | .      | . |
| Vv08g1020    | Tc05_g003930       | .                  | .                  | . | .      | . |

|                    |                    |                    |   |   |   |        |   |
|--------------------|--------------------|--------------------|---|---|---|--------|---|
| .                  | .                  | .                  | . | . | . | .      | . |
| .                  | .                  | .                  | . | . | . | .      | . |
| Vv08g1021          | Tc05_g003910       | Gorai.006G170500.1 | . | . | . | .      | . |
|                    | Gorai.012G107000.1 | Vv13g0454          | . | . | . | .      | . |
| Tc10_g002620       | .                  | Gorai.011G269200.1 | . | . | . | .      | . |
| .                  | .                  | .                  | . | . | . | .      | . |
| Vv08g1022          | Tc05_g003900       | .                  | . | . | . | .      | . |
| Gorai.007G377100.1 | .                  | .                  | . | . | . | .      | . |
| .                  | .                  | .                  | . | . | . | .      | . |
| Vv08g1023          | Tc05_g003890       | Gorai.006G170400.1 | . | . | . | .      | . |
|                    | Gorai.012G107200.1 | .                  | . | . | . | .      | . |
| .                  | .                  | .                  | . | . | . | .      | . |
| .                  | .                  | .                  | . | . | . | .      | . |
| Vv08g1024          | Tc05_g003880       | .                  | . | . | . | Gorai. | . |
| 012G107300.1       | .                  | .                  | . | . | . | .      | . |
| .                  | .                  | .                  | . | . | . | .      | . |
| Vv08g1025          | Tc05_g003870       | Gorai.006G170300.1 | . | . | . | .      | . |
|                    | Gorai.012G107500.1 | .                  | . | . | . | .      | . |
| .                  | .                  | .                  | . | . | . | .      | . |
| .                  | .                  | .                  | . | . | . | .      | . |
| Vv08g1026          | Tc05_g003860       | .                  | . | . | . | Gorai. | . |
| 012G107600.1       | .                  | .                  | . | . | . | .      | . |
| .                  | .                  | .                  | . | . | . | .      | . |
| Vv08g1027          | .                  | Gorai.002G256200.1 | . | . | . | .      | . |
|                    | Gorai.007G377200.1 | .                  | . | . | . | .      | . |
| .                  | .                  | .                  | . | . | . | .      | . |
| .                  | .                  | .                  | . | . | . | .      | . |
| Vv08g1028          | Tc05_g003840       | .                  | . | . | . | Gorai. | . |
| 012G107700.1       | Vv13g0456          | Tc10_g002590       | . | . | . | .      | . |
| Gorai.011G269700.1 | .                  | .                  | . | . | . | .      | . |
| .                  | .                  | .                  | . | . | . | .      | . |
| Vv08g1029          | Tc05_g003820       | .                  | . | . | . | Gorai. | . |
| 012G107800.1       | .                  | .                  | . | . | . | .      | . |
| .                  | .                  | .                  | . | . | . | .      | . |
| Vv08g1030          | Tc05_g003800       | Gorai.006G170200.1 | . | . | . | .      | . |
| .                  | .                  | .                  | . | . | . | .      | . |
| .                  | .                  | .                  | . | . | . | .      | . |
| Vv08g1031          | .                  | .                  | . | . | . | .      | . |
| .                  | .                  | .                  | . | . | . | .      | . |
| .                  | .                  | .                  | . | . | . | .      | . |
| Vv08g1032          | Tc05_g003760       | .                  | . | . | . | Gorai. | . |
| 012G108100.1       | .                  | .                  | . | . | . | .      | . |
| .                  | .                  | .                  | . | . | . | .      | . |
| Vv08g1033          | .                  | .                  | . | . | . | .      | . |
| .                  | .                  | .                  | . | . | . | .      | . |
| .                  | .                  | .                  | . | . | . | .      | . |
| Vv08g1034          | Tc05_g003750       | .                  | . | . | . | .      | . |
| .                  | .                  | .                  | . | . | . | .      | . |
| .                  | .                  | .                  | . | . | . | .      | . |
| Vv08g1035          | .                  | .                  | . | . | . | .      | . |



|              |                    |                    |        |   |   |   |
|--------------|--------------------|--------------------|--------|---|---|---|
| .            | .                  | .                  | .      | . | . | . |
| .            | .                  | .                  | .      | . | . | . |
| Vv08g1036    | Tc05_g003740       | Gorai.006G170000.1 | .      | . | . | . |
| .            | .                  | .                  | .      | . | . | . |
| .            | .                  | .                  | .      | . | . | . |
| Vv08g1037    | Tc05_g003730       | .                  | .      | . | . | . |
| .            | .                  | .                  | .      | . | . | . |
| .            | .                  | .                  | .      | . | . | . |
| Vv08g1038    | .                  | .                  | .      | . | . | . |
| .            | .                  | .                  | .      | . | . | . |
| .            | .                  | .                  | .      | . | . | . |
| Vv08g1039    | .                  | .                  | .      | . | . | . |
| .            | .                  | .                  | .      | . | . | . |
| .            | .                  | .                  | .      | . | . | . |
| Vv08g1040    | .                  | .                  | .      | . | . | . |
| .            | .                  | .                  | .      | . | . | . |
| .            | .                  | .                  | .      | . | . | . |
| Vv08g1041    | Tc05_g003720       | Gorai.006G169900.1 | .      | . | . | . |
| .            | .                  | .                  | .      | . | . | . |
| .            | .                  | .                  | .      | . | . | . |
| Vv08g1042    | .                  | .                  | .      | . | . | . |
| .            | .                  | .                  | .      | . | . | . |
| .            | .                  | .                  | .      | . | . | . |
| Vv08g1043    | Tc05_g003710       | Gorai.002G256100.1 | .      | . | . | . |
| .            | .                  | .                  | .      | . | . | . |
| .            | .                  | .                  | .      | . | . | . |
| Vv08g1044    | Tc05_g003690       | Gorai.006G169800.1 | .      | . | . | . |
| .            | .                  | .                  | .      | . | . | . |
| .            | .                  | .                  | .      | . | . | . |
| Vv08g1045    | Tc05_g003680       | Gorai.002G255900.1 | .      | . | . | . |
| .            | .                  | .                  | .      | . | . | . |
| .            | .                  | .                  | .      | . | . | . |
| Vv08g1046    | Tc05_g003670       | Gorai.006G169600.1 | .      | . | . | . |
| .            | .                  | .                  | .      | . | . | . |
| .            | .                  | .                  | .      | . | . | . |
| Vv08g1047    | Tc05_g003660       | Gorai.002G255800.1 | .      | . | . | . |
| .            | Gorai.012G108300.1 | Vv13g0465          | .      | . | . | . |
| Tc10_g002390 | Gorai.011G271200.1 | .                  | .      | . | . | . |
| .            | .                  | .                  | .      | . | . | . |
| Vv08g1048    | Tc05_g003650       | Gorai.006G169500.1 | Gorai. | . | . | . |
| 002G255700.1 | .                  | .                  | .      | . | . | . |
| .            | .                  | .                  | .      | . | . | . |
| .            | .                  | .                  | .      | . | . | . |
| Vv08g1049    | Tc05_g003640       | Gorai.006G169400.1 | .      | . | . | . |
| .            | Vv13g0466          | Tc10_g002380       | .      | . | . | . |
| .            | .                  | .                  | .      | . | . | . |
| .            | .                  | .                  | .      | . | . | . |
| Vv08g1050    | .                  | .                  | .      | . | . | . |
| .            | .                  | .                  | .      | . | . | . |
| .            | .                  | .                  | .      | . | . | . |

|                    |                    |                    |                    |   |
|--------------------|--------------------|--------------------|--------------------|---|
| Vv08g1051          | Tc05_g003630       | Gorai.006G169300.1 | .                  | . |
| .                  | .                  | .                  | .                  | . |
| Vv08g1052          | Tc05_g003610       | Gorai.002G255500.1 | .                  | . |
| .                  | .                  | .                  | .                  | . |
| Vv08g1053          | Tc05_g003600       | .                  | Gorai.             | . |
| 012G108500.1       | Vv13g0491          | .                  | .                  | . |
| .                  | .                  | .                  | .                  | . |
| Vv08g1054          | Tc05_g003590       | Gorai.006G178100.1 | .                  | . |
| Gorai.012G108600.1 | .                  | Gorai.007G377300.1 | Vv13g0492          | . |
| .                  | .                  | .                  | Gorai.012G073500.1 | . |
| Vv08g1055          | Tc05_g003580       | Gorai.006G178200.1 | .                  | . |
| .                  | Gorai.007G377400.1 | Vv13g0493          | .                  | . |
| Gorai.011G274100.1 | .                  | .                  | Gorai.012G073600.1 | . |
| .                  | .                  | .                  | .                  | . |
| Vv08g1056          | Tc05_g003570       | Gorai.002G252500.1 | .                  | . |
| Gorai.012G108700.1 | .                  | .                  | .                  | . |
| .                  | .                  | .                  | .                  | . |
| Vv08g1057          | .                  | Gorai.006G178300.1 | Gorai.002G258900.1 | . |
| .                  | .                  | Vv13g0495          | .                  | . |
| Gorai.011G274300.1 | .                  | Gorai.010G199600.1 | .                  | . |
| .                  | .                  | .                  | .                  | . |
| Vv08g1058          | Tc05_g003540       | Gorai.006G178400.1 | .                  | . |
| .                  | .                  | .                  | .                  | . |
| Vv08g1059          | .                  | .                  | .                  | . |
| .                  | .                  | .                  | .                  | . |
| Vv08g1060          | Tc05_g003530       | Gorai.006G178600.1 | .                  | . |
| Gorai.012G108800.1 | .                  | .                  | .                  | . |
| .                  | .                  | .                  | .                  | . |
| Vv08g1061          | Tc05_g003510       | Gorai.006G178700.1 | .                  | . |
| .                  | .                  | .                  | .                  | . |
| Vv08g1062          | Tc05_g003500       | .                  | .                  | . |
| Vv06g0671          | Tc09_g030850       | .                  | .                  | . |
| Gorai.003G127400.1 | .                  | .                  | .                  | . |
| .                  | .                  | .                  | .                  | . |
| Vv08g1063          | .                  | .                  | Gorai.012G108900.1 | . |
| .                  | .                  | .                  | .                  | . |
| Vv08g1064          | Tc05_g003490       | Gorai.006G178800.1 | .                  | . |
| Gorai.012G109000.1 | .                  | Gorai.007G377500.1 | .                  | . |
| .                  | .                  | .                  | Vv13g0497          | . |
| .                  | Gorai.011G274600.1 | .                  | Gorai.             | . |

|                    |                    |                    |                    |   |   |
|--------------------|--------------------|--------------------|--------------------|---|---|
| 012G073700.1       |                    |                    |                    |   |   |
| Vv08g1065          | Tc05_g003480       | Gorai.006G178900.1 | .                  | . | . |
| .                  | .                  | .                  | .                  | . | . |
| .                  | .                  | .                  | .                  | . | . |
| Vv08g1066          | Tc05_g003460       | Gorai.002G259000.1 | .                  | . | . |
| .                  | .                  | Vv06g0675          | Tc09_g030810       | . | . |
| .                  | .                  | Gorai.003G126900.1 | .                  | . | . |
| .                  | .                  | .                  | .                  | . | . |
| Vv08g1067          | .                  | .                  | .                  | . | . |
| .                  | .                  | .                  | .                  | . | . |
| .                  | .                  | .                  | .                  | . | . |
| Vv08g1068          | Tc05_g003360       | Gorai.006G179200.1 | .                  | . | . |
| .                  | .                  | Vv06g0679          | Tc09_g030660       | . | . |
| .                  | Gorai.009G094900.1 | Gorai.003G126700.1 | .                  | . | . |
| .                  | .                  | .                  | .                  | . | . |
| Vv08g1069          | Tc05_g003350       | Gorai.006G179300.1 | .                  | . | . |
| .                  | .                  | .                  | .                  | . | . |
| .                  | .                  | .                  | .                  | . | . |
| Vv08g1070          | Tc05_g003330       | Gorai.006G179400.1 | Gorai.             | . | . |
| 002G259100.1       | .                  | Gorai.012G109300.1 | Gorai.007G377600.1 | . | . |
| Vv06g0680          | Tc09_g030650       | .                  | .                  | . | . |
| .                  | .                  | .                  | .                  | . | . |
| Vv08g1071          | Tc05_g003320       | Gorai.006G179500.1 | Gorai.             | . | . |
| 002G259200.1       | .                  | .                  | .                  | . | . |
| .                  | .                  | .                  | .                  | . | . |
| .                  | .                  | .                  | .                  | . | . |
| Vv08g1072          | Tc05_g003310       | Gorai.006G179600.1 | .                  | . | . |
| Gorai.012G109400.1 | .                  | Vv06g0684          | .                  | . | . |
| .                  | .                  | .                  | .                  | . | . |
| .                  | .                  | .                  | .                  | . | . |
| Vv08g1073          | Tc05_g003300       | Gorai.006G179700.1 | .                  | . | . |
| .                  | .                  | .                  | .                  | . | . |
| .                  | .                  | .                  | .                  | . | . |
| Vv08g1074          | .                  | .                  | .                  | . | . |
| .                  | .                  | .                  | .                  | . | . |
| .                  | .                  | .                  | .                  | . | . |
| Vv08g1075          | Tc05_g003290       | .                  | Gorai.             | . | . |
| 012G109700.1       | .                  | .                  | .                  | . | . |
| .                  | .                  | .                  | .                  | . | . |
| Vv08g1076          | Tc05_g003270       | Gorai.002G259300.1 | .                  | . | . |
| Gorai.002G148300.1 | .                  | Gorai.007G377700.1 | Vv06g0685          | . | . |
| .                  | .                  | .                  | .                  | . | . |
| .                  | .                  | .                  | .                  | . | . |
| Vv08g1077          | Tc05_g003260       | .                  | .                  | . | . |
| .                  | .                  | .                  | .                  | . | . |
| .                  | .                  | .                  | .                  | . | . |
| Vv08g1078          | .                  | .                  | .                  | . | . |
| .                  | .                  | .                  | .                  | . | . |
| .                  | .                  | .                  | .                  | . | . |
| Vv08g1079          | .                  | .                  | .                  | . | . |

|              |                    |                    |        |                    |   |        |   |
|--------------|--------------------|--------------------|--------|--------------------|---|--------|---|
| .            | .                  | .                  | .      | .                  | . | .      | . |
| .            | .                  | .                  | .      | .                  | . | .      | . |
| Vv08g1080    | .                  | .                  | .      | .                  | . | .      | . |
| .            | .                  | .                  | .      | .                  | . | .      | . |
| Vv08g1081    | .                  | .                  | .      | .                  | . | .      | . |
| .            | .                  | .                  | .      | .                  | . | .      | . |
| Vv08g1082    | Tc05_g003250       | .                  | .      | .                  | . | Gorai. | . |
| 012G110100.1 | Gorai.007G377800.1 | .                  | .      | .                  | . | .      | . |
| .            | .                  | .                  | .      | .                  | . | .      | . |
| Vv08g1083    | Tc05_g003240       | .                  | .      | Gorai.002G259700.1 | . | .      | . |
|              | Gorai.012G110200.1 | .                  | .      | .                  | . | .      | . |
| .            | .                  | .                  | .      | .                  | . | .      | . |
| Vv08g1084    | Tc05_g003230       | .                  | .      | .                  | . | Gorai. | . |
| 012G110300.1 | .                  | .                  | .      | .                  | . | .      | . |
| .            | .                  | .                  | .      | .                  | . | .      | . |
| Vv08g1085    | Tc05_g003220       | Gorai.006G179800.1 | .      | .                  | . | .      | . |
|              | Gorai.012G110400.1 | .                  | .      | .                  | . | .      | . |
| .            | .                  | .                  | .      | .                  | . | .      | . |
| Vv08g1086    | Tc05_g003210       | Gorai.006G179900.1 | .      | .                  | . | .      | . |
| .            | Vv06g0687          | Tc09_g030600       | Gorai. | .                  | . | Gorai. | . |
| 013G261300.1 | .                  | Gorai.009G094600.1 | Gorai. | .                  | . | Gorai. | . |
| 003G126300.1 | .                  | .                  | .      | .                  | . | .      | . |
| Vv08g1087    | Tc05_g003200       | .                  | .      | .                  | . | Gorai. | . |
| 012G110600.1 | .                  | .                  | .      | .                  | . | .      | . |
| .            | .                  | .                  | .      | .                  | . | .      | . |
| Vv08g1088    | Tc05_g003180       | Gorai.006G180000.1 | .      | .                  | . | .      | . |
| .            | .                  | .                  | .      | .                  | . | .      | . |
| Vv08g1089    | .                  | .                  | .      | .                  | . | .      | . |
| .            | .                  | .                  | .      | .                  | . | .      | . |
| Vv08g1090    | Tc05_g003170       | Gorai.006G180100.1 | .      | .                  | . | .      | . |
|              | Gorai.012G110800.1 | Gorai.007G377900.1 | .      | .                  | . | .      | . |
| .            | .                  | .                  | .      | .                  | . | .      | . |
| Vv08g1091    | Tc05_g003160       | .                  | .      | .                  | . | Gorai. | . |
| 012G110900.1 | .                  | .                  | .      | .                  | . | .      | . |
| .            | .                  | .                  | .      | .                  | . | .      | . |
| Vv08g1092    | .                  | .                  | .      | .                  | . | .      | . |
| .            | .                  | .                  | .      | .                  | . | .      | . |
| Vv08g1093    | Tc05_g003130       | Gorai.002G260400.1 | .      | .                  | . | .      | . |
| .            | Vv06g0692          | Tc09_g030530       | .      | .                  | . | .      | . |
| .            | Gorai.009G094400.1 | Gorai.003G125400.1 | .      | .                  | . | .      | . |
| .            | .                  | .                  | .      | .                  | . | .      | . |

|                    |                    |                    |                    |        |
|--------------------|--------------------|--------------------|--------------------|--------|
| Vv08g1094          | Tc05_g003120       | .                  | Gorai.002G260500.1 | .      |
| .                  | .                  | Vv06g0694          | Tc09_g030510       | .      |
| .                  | Gorai.004G006600.1 | .                  | .                  | .      |
| Vv08g1095          | Tc05_g003110       | .                  | .                  | Gorai. |
| 012G1111000.1      | .                  | .                  | .                  | .      |
| Vv08g1096          | Tc05_g003100       | Gorai.006G180200.1 | .                  | .      |
| Gorai.012G111100.1 | .                  | .                  | .                  | .      |
| .                  | .                  | .                  | .                  | .      |
| Vv08g1097          | Tc05_g003080       | .                  | .                  | Gorai. |
| 012G1111200.1      | .                  | .                  | .                  | .      |
| Vv08g1098          | Tc05_g003070       | .                  | Gorai.002G260600.1 | .      |
| Gorai.012G111300.1 | .                  | .                  | .                  | .      |
| .                  | .                  | .                  | .                  | .      |
| Vv08g1099          | Tc05_g003060       | .                  | Gorai.002G260800.1 | .      |
| .                  | .                  | .                  | .                  | .      |
| Vv08g1100          | Tc05_g003050       | .                  | Gorai.002G148400.1 | .      |
| Gorai.012G111400.1 | .                  | .                  | .                  | .      |
| .                  | .                  | .                  | .                  | .      |
| Vv08g1101          | Tc05_g003040       | .                  | .                  | Gorai. |
| 012G1111500.1      | .                  | .                  | .                  | .      |
| Vv08g1102          | Tc05_g003020       | .                  | Gorai.002G260900.1 | .      |
| .                  | Gorai.007G378000.1 | .                  | .                  | .      |
| .                  | .                  | .                  | .                  | .      |
| Vv08g1103          | .                  | .                  | .                  | .      |
| .                  | .                  | .                  | .                  | .      |
| Vv08g1104          | .                  | .                  | Gorai.012G111600.1 | .      |
| .                  | .                  | .                  | .                  | .      |
| Vv08g1105          | Tc05_g003010       | Gorai.006G180300.1 | .                  | .      |
| Gorai.012G111700.1 | .                  | .                  | .                  | .      |
| .                  | .                  | .                  | .                  | .      |
| Vv08g1106          | Tc05_g003000       | Gorai.006G180400.1 | .                  | .      |
| .                  | .                  | .                  | .                  | .      |
| Vv08g1107          | Tc05_g002990       | Gorai.006G180500.1 | .                  | .      |
| .                  | Vv06g0709          | Tc09_g030410       | .                  | .      |
| .                  | Gorai.003G124900.1 | .                  | .                  | .      |
| .                  | .                  | .                  | .                  | .      |
| Vv08g1108          | Tc05_g002970       | Gorai.006G180600.1 | .                  | .      |

|                    |                    |                    |                    |              |   |   |   |
|--------------------|--------------------|--------------------|--------------------|--------------|---|---|---|
| .                  | .                  | .                  | .                  | .            | . | . | . |
| .                  | .                  | .                  | .                  | .            | . | . | . |
| Vv08g1109          | .                  | .                  | .                  | .            | . | . | . |
| .                  | .                  | .                  | .                  | .            | . | . | . |
| Vv08g1110          | Tc05_g002950       | .                  | Gorai.002G261000.1 | .            | . | . | . |
|                    | Gorai.012G111800.1 | Gorai.007G378100.1 |                    | Vv06g0711    | . | . | . |
|                    | Tc09_g030390       | Gorai.001G114900.1 | .                  | .            | . | . | . |
| .                  | .                  | .                  | .                  | .            | . | . | . |
| Vv08g1111          | Tc05_g002940       | .                  | .                  | .            | . | . | . |
| .                  | .                  | .                  | .                  | .            | . | . | . |
| Vv08g1112          | Tc05_g002930       | .                  | Gorai.002G261300.1 | .            | . | . | . |
| .                  | .                  | .                  | .                  | .            | . | . | . |
| Vv08g1113          | Tc05_g002920       | Gorai.006G180700.1 | .                  | .            | . | . | . |
| .                  | .                  | .                  | .                  | .            | . | . | . |
| Vv08g1114          | Tc05_g002910       | .                  | Gorai.002G261400.1 | .            | . | . | . |
| .                  | Vv06g0714          | Gorai.002G261400.1 | .                  | Tc09_g030360 | . | . | . |
| .                  | Gorai.009G093900.1 | .                  | .                  | .            | . | . | . |
| .                  | .                  | .                  | .                  | .            | . | . | . |
| Vv08g1115          | Tc05_g002900       | .                  | Gorai.002G261500.1 | .            | . | . | . |
|                    | Gorai.012G111900.1 | Gorai.007G378200.1 | .                  | .            | . | . | . |
| .                  | .                  | .                  | .                  | .            | . | . | . |
| Vv08g1116          | Tc05_g002890       | Gorai.006G180900.1 | Gorai.             | .            | . | . | . |
| 002G261600.1       | .                  | Gorai.012G112000.1 | Gorai.007G378300.1 | .            | . | . | . |
|                    | Vv06g0716          | Tc09_g030340       | .                  | .            | . | . | . |
| Gorai.009G093700.1 | .                  | .                  | .                  | .            | . | . | . |
| .                  | .                  | .                  | .                  | .            | . | . | . |
| Vv08g1117          | Tc05_g002870       | .                  | .                  | Gorai.       | . | . | . |
| 012G112100.1       | .                  | .                  | .                  | .            | . | . | . |
| .                  | .                  | .                  | .                  | .            | . | . | . |
| Vv08g1118          | Tc05_g002860       | .                  | Gorai.002G261700.1 | .            | . | . | . |
|                    | Gorai.012G112200.1 | .                  | Vv06g0731          | .            | . | . | . |
| .                  | .                  | .                  | .                  | .            | . | . | . |
| Vv08g1119          | .                  | .                  | .                  | .            | . | . | . |
| .                  | .                  | .                  | .                  | .            | . | . | . |
| Vv08g1120          | Tc05_g002850       | Gorai.006G181000.1 | Gorai.             | .            | . | . | . |
| 002G261800.1       | .                  | Gorai.012G112300.1 | .                  | .            | . | . | . |
| .                  | .                  | .                  | .                  | .            | . | . | . |
| Vv08g1121          | Tc05_g002840       | Gorai.006G181100.1 | .                  | .            | . | . | . |
| .                  | .                  | .                  | .                  | .            | . | . | . |
| Vv08g1122          | Tc05_g002830       | .                  | Gorai.002G262000.1 | .            | . | . | . |
|                    | Gorai.012G112400.1 | .                  | .                  | .            | . | . | . |

|                    |                    |                    |           |   |   |   |   |
|--------------------|--------------------|--------------------|-----------|---|---|---|---|
| .                  | .                  | .                  | .         | . | . | . | . |
| .                  | .                  | .                  | .         | . | . | . | . |
| Vv08g1123          | .                  | .                  | .         | . | . | . | . |
| .                  | .                  | .                  | .         | . | . | . | . |
| .                  | .                  | .                  | .         | . | . | . | . |
| Vv08g1124          | Tc05_g002820       | Gorai.006G181200.1 | .         | . | . | . | . |
| Gorai.002G148500.1 | Gorai.012G112800.1 | .                  | .         | . | . | . | . |
| .                  | .                  | .                  | .         | . | . | . | . |
| .                  | .                  | .                  | .         | . | . | . | . |
| Vv08g1125          | Tc05_g002780       | Gorai.006G181400.1 | Gorai.    | . | . | . | . |
| 002G262100.1       | Gorai.012G112900.1 | .                  | .         | . | . | . | . |
| .                  | .                  | .                  | .         | . | . | . | . |
| Tc10_g001900       | Gorai.013G018900.1 | Gorai.011G283900.1 | Vv13g0022 | . | . | . | . |
| .                  | Gorai.012G076100.1 | .                  | .         | . | . | . | . |
| Vv08g1126          | .                  | .                  | .         | . | . | . | . |
| .                  | .                  | .                  | .         | . | . | . | . |
| .                  | .                  | .                  | .         | . | . | . | . |
| Vv08g1127          | .                  | .                  | .         | . | . | . | . |
| .                  | .                  | .                  | .         | . | . | . | . |
| .                  | .                  | .                  | .         | . | . | . | . |
| Vv08g1128          | .                  | .                  | .         | . | . | . | . |
| .                  | .                  | .                  | .         | . | . | . | . |
| .                  | .                  | .                  | .         | . | . | . | . |
| Vv08g1129          | Tc05_g002770       | .                  | .         | . | . | . | . |
| .                  | .                  | .                  | .         | . | . | . | . |
| .                  | .                  | .                  | .         | . | . | . | . |
| Vv08g1130          | Tc05_g002760       | Gorai.006G181600.1 | .         | . | . | . | . |
| Gorai.012G113000.1 | .                  | .                  | .         | . | . | . | . |
| .                  | .                  | .                  | .         | . | . | . | . |
| .                  | .                  | .                  | .         | . | . | . | . |
| Vv08g1131          | .                  | .                  | .         | . | . | . | . |
| .                  | .                  | .                  | .         | . | . | . | . |
| .                  | .                  | .                  | .         | . | . | . | . |
| Vv08g1132          | .                  | .                  | .         | . | . | . | . |
| .                  | .                  | .                  | .         | . | . | . | . |
| .                  | .                  | .                  | .         | . | . | . | . |
| Vv08g1133          | Tc05_g002730       | .                  | .         | . | . | . | . |
| .                  | .                  | .                  | .         | . | . | . | . |
| .                  | .                  | .                  | .         | . | . | . | . |
| Vv08g1134          | Tc05_g002720       | .                  | .         | . | . | . | . |
| .                  | .                  | .                  | .         | . | . | . | . |
| .                  | .                  | .                  | .         | . | . | . | . |
| Vv08g1135          | Tc05_g002690       | Gorai.006G181700.1 | .         | . | . | . | . |
| .                  | .                  | .                  | .         | . | . | . | . |
| .                  | .                  | .                  | .         | . | . | . | . |
| Vv08g1136          | Tc05_g002670       | Gorai.002G264300.1 | .         | . | . | . | . |
| .                  | .                  | .                  | .         | . | . | . | . |
| .                  | .                  | .                  | .         | . | . | . | . |
| Vv08g1137          | Tc05_g002660       | Gorai.002G148600.1 | .         | . | . | . | . |
| .                  | .                  | .                  | .         | . | . | . | . |

|                    |                    |                    |   |                    |        |   |
|--------------------|--------------------|--------------------|---|--------------------|--------|---|
| .                  | Vv13g0031          | .                  | . | .                  | .      | . |
| Gorai.012G076300.1 | .                  | .                  | . | .                  | .      | . |
| Vv08g1138          | Tc05_g002650       | .                  | . | .                  | .      | . |
| .                  | .                  | .                  | . | .                  | .      | . |
| Vv08g1139          | Tc05_g002630       | .                  | . | .                  | Gorai. | . |
| 012G113200.1       | .                  | .                  | . | .                  | .      | . |
| .                  | Vv13g0032          | .                  | . | Gorai.011G285700.1 | .      | . |
| .                  | Gorai.012G076400.1 | .                  | . | .                  | .      | . |
| Vv08g1140          | Tc05_g002620       | Gorai.006G181800.1 | . | .                  | .      | . |
| .                  | Gorai.007G378800.1 | .                  | . | .                  | .      | . |
| .                  | .                  | Vv13g0034          | . | Gorai.             | .      | . |
| 013G018700.1       | .                  | Gorai.012G076700.1 | . | .                  | .      | . |
| Vv08g1141          | Tc05_g002610       | .                  | . | .                  | .      | . |
| .                  | .                  | .                  | . | .                  | .      | . |
| Vv08g1142          | Tc05_g002600       | .                  | . | .                  | .      | . |
| .                  | .                  | .                  | . | .                  | .      | . |
| Vv08g1143          | .                  | .                  | . | .                  | .      | . |
| .                  | .                  | .                  | . | .                  | .      | . |
| Vv08g1144          | Tc05_g002580       | .                  | . | .                  | Gorai. | . |
| 012G113300.1       | .                  | .                  | . | .                  | .      | . |
| .                  | .                  | .                  | . | .                  | .      | . |
| Vv08g1145          | Tc05_g002560       | .                  | . | .                  | Gorai. | . |
| 012G113400.1       | .                  | .                  | . | .                  | .      | . |
| .                  | .                  | .                  | . | .                  | .      | . |
| Vv08g1146          | Tc05_g002550       | .                  | . | .                  | Gorai. | . |
| 012G113500.1       | .                  | .                  | . | .                  | .      | . |
| .                  | .                  | .                  | . | .                  | .      | . |
| Vv08g1147          | .                  | .                  | . | .                  | .      | . |
| .                  | .                  | .                  | . | .                  | .      | . |
| Vv08g1148          | Tc05_g002540       | Gorai.006G182300.1 | . | .                  | .      | . |
| .                  | Gorai.012G113600.1 | Vv06g0768          | . | .                  | .      | . |
| Tc09_g029960       | .                  | Gorai.004G007100.1 | . | Gorai.             | .      | . |
| 009G092200.1       | .                  | .                  | . | .                  | .      | . |
| .                  | .                  | .                  | . | .                  | .      | . |
| Vv08g1149          | Tc05_g002530       | Gorai.006G182400.1 | . | .                  | .      | . |
| .                  | .                  | .                  | . | .                  | .      | . |
| .                  | .                  | .                  | . | .                  | .      | . |
| Vv08g1150          | Tc05_g002500       | .                  | . | .                  | Gorai. | . |
| 012G114000.1       | .                  | .                  | . | .                  | .      | . |
| .                  | Vv13g0047          | Gorai.013G018300.1 | . | .                  | .      | . |
| .                  | .                  | .                  | . | .                  | .      | . |
| Vv08g1151          | Gorai.006G182500.1 | .                  | . | .                  | .      | . |
| .                  | .                  | .                  | . | .                  | .      | . |
| .                  | .                  | .                  | . | .                  | .      | . |
| Vv08g1152          | .                  | .                  | . | .                  | .      | . |



|                    |                    |                    |                    |   |        |
|--------------------|--------------------|--------------------|--------------------|---|--------|
| Vv06g0779          | Tc09_g029880       | .                  | .                  | . | Gorai. |
| 009G091700.1       | Gorai.006G106400.1 | .                  | Vv13g0058          | . | .      |
| Tc10_g001510       | .                  | .                  | Gorai.010G198000.1 | . | .      |
| Gorai.012G076900.1 | .                  | .                  | .                  | . | .      |
| Vv08g1153          | .                  | .                  | .                  | . | .      |
| .                  | .                  | .                  | .                  | . | .      |
| .                  | .                  | .                  | .                  | . | .      |
| Vv08g1154          | .                  | .                  | .                  | . | .      |
| .                  | .                  | .                  | .                  | . | .      |
| .                  | .                  | .                  | .                  | . | .      |
| Vv08g1155          | Gorai.006G149600.1 | .                  | .                  | . | .      |
| .                  | .                  | .                  | .                  | . | .      |
| .                  | .                  | .                  | .                  | . | .      |
| Vv08g1156          | .                  | .                  | .                  | . | .      |
| .                  | .                  | .                  | .                  | . | .      |
| .                  | .                  | .                  | .                  | . | .      |
| Vv08g1157          | .                  | .                  | .                  | . | .      |
| .                  | .                  | .                  | .                  | . | .      |
| .                  | .                  | .                  | .                  | . | .      |
| Vv08g1158          | Gorai.006G149900.1 | .                  | .                  | . | .      |
| .                  | .                  | .                  | .                  | . | .      |
| .                  | .                  | .                  | .                  | . | .      |
| Vv08g1159          | Tc05_g011670       | Gorai.006G150100.1 | Gorai.             | . | .      |
| 002G235800.1       | Gorai.009G397400.1 | Gorai.007G365600.1 | .                  | . | .      |
| .                  | .                  | .                  | .                  | . | .      |
| .                  | .                  | .                  | .                  | . | .      |
| Vv08g1160          | Tc05_g011630       | Gorai.006G150200.1 | Gorai.             | . | .      |
| 002G235900.1       | .                  | .                  | .                  | . | .      |
| .                  | .                  | .                  | .                  | . | .      |
| .                  | .                  | .                  | .                  | . | .      |
| Vv08g1161          | .                  | .                  | .                  | . | .      |
| .                  | .                  | .                  | .                  | . | .      |
| .                  | .                  | .                  | .                  | . | .      |
| Vv08g1162          | Tc05_g011570       | Gorai.006G150400.1 | .                  | . | .      |
| .                  | Vv06g0784          | Tc09_g029790       | .                  | . | .      |
| .                  | Gorai.009G091300.1 | Vv13g0065          | .                  | . | .      |
| Tc10_g001410       | Gorai.011G289100.1 | Gorai.009G322600.1 | .                  | . | .      |
| .                  | .                  | .                  | .                  | . | .      |
| Vv08g1163          | Tc05_g011520       | Gorai.006G150500.1 | .                  | . | .      |
| .                  | .                  | .                  | .                  | . | .      |
| .                  | .                  | .                  | .                  | . | .      |
| Vv08g1164          | .                  | .                  | .                  | . | .      |
| .                  | .                  | .                  | .                  | . | .      |
| .                  | .                  | .                  | .                  | . | .      |
| Vv08g1165          | Tc05_g011500       | .                  | .                  | . | .      |
| .                  | .                  | .                  | .                  | . | .      |
| .                  | .                  | .                  | .                  | . | .      |
| Vv08g1166          | Gorai.006G150600.1 | Gorai.002G236000.1 | .                  | . | .      |
| .                  | Vv0Unrg8945        | .                  | .                  | . | .      |
| .                  | .                  | .                  | .                  | . | .      |
| .                  | .                  | .                  | .                  | . | .      |

|                    |                    |                    |        |
|--------------------|--------------------|--------------------|--------|
| Vv08g1167          | Tc05_g011460       | Gorai.006G150700.1 | Gorai. |
| 002G236100.1       | Gorai.009G397700.1 | .                  | .      |
| .                  | .                  | .                  | .      |
| Vv08g1168          | Tc05_g011450       | .                  | Gorai. |
| 009G397800.1       | .                  | .                  | .      |
| .                  | .                  | .                  | .      |
| Vv08g1169          | .                  | .                  | .      |
| .                  | .                  | .                  | .      |
| Vv08g1170          | .                  | Gorai.002G157200.1 | .      |
| Gorai.007G366600.1 | Vv0Unrg8948        | .                  | .      |
| .                  | .                  | .                  | .      |
| .                  | .                  | .                  | .      |
| Vv08g1171          | Gorai.006G150800.1 | Gorai.002G236300.1 | .      |
| .                  | Gorai.009G397900.1 | Gorai.007G366700.1 | .      |
| .                  | .                  | .                  | .      |
| Vv08g1172          | .                  | .                  | .      |
| .                  | .                  | .                  | .      |
| Vv08g1173          | .                  | Gorai.009G398000.1 | .      |
| .                  | .                  | .                  | .      |
| .                  | .                  | .                  | .      |
| Vv08g1174          | Gorai.006G150900.1 | Gorai.002G236400.1 | .      |
| Gorai.002G157300.1 | Gorai.009G398100.1 | .                  | .      |
| Vv0Unrg8950        | .                  | .                  | .      |
| .                  | .                  | .                  | .      |
| Vv08g1175          | Gorai.006G151000.1 | Gorai.002G236600.1 | .      |
| .                  | Gorai.007G367100.1 | Vv0Unrg8952        | .      |
| .                  | .                  | .                  | .      |
| Vv08g1176          | .                  | .                  | .      |
| .                  | .                  | .                  | .      |
| .                  | .                  | .                  | .      |
| Vv08g1177          | Gorai.006G151100.1 | Gorai.002G236700.1 | .      |
| Gorai.002G157600.1 | Gorai.009G398500.1 | Gorai.             | .      |
| 007G367300.1       | .                  | .                  | .      |
| .                  | .                  | .                  | .      |
| Vv08g1178          | Gorai.006G151400.1 | .                  | .      |
| .                  | .                  | .                  | .      |
| .                  | .                  | .                  | .      |
| Vv08g1179          | .                  | .                  | .      |
| .                  | .                  | .                  | .      |
| .                  | .                  | .                  | .      |
| Vv08g1180          | Gorai.006G151500.1 | Gorai.002G267100.1 | .      |
| .                  | .                  | .                  | .      |
| .                  | .                  | .                  | .      |
| .                  | .                  | .                  | .      |

|              |                    |                    |                    |   |   |
|--------------|--------------------|--------------------|--------------------|---|---|
| Vv08g1181    | .                  | .                  | Gorai.002G236800.1 | . | . |
|              | Gorai.007G367500.1 | .                  | .                  | . | . |
| .            | .                  | .                  | .                  | . | . |
| Vv08g1182    | .                  | .                  | .                  | . | . |
| .            | .                  | .                  | .                  | . | . |
| .            | .                  | .                  | .                  | . | . |
| Vv08g1183    | .                  | Gorai.006G151600.1 | Gorai.002G236900.1 | . | . |
| .            | .                  | .                  | .                  | . | . |
| .            | .                  | .                  | .                  | . | . |
| Vv08g1184    | .                  | .                  | .                  | . | . |
| .            | .                  | .                  | .                  | . | . |
| .            | .                  | .                  | .                  | . | . |
| Vv08g1185    | .                  | .                  | Gorai.002G237000.1 | . | . |
| .            | .                  | .                  | .                  | . | . |
| .            | .                  | .                  | .                  | . | . |
| Vv08g1186    | .                  | .                  | .                  | . | . |
| .            | .                  | .                  | .                  | . | . |
| .            | .                  | .                  | .                  | . | . |
| Vv08g1187    | .                  | Gorai.006G151900.1 | Gorai.002G237200.1 | . | . |
| .            | .                  | .                  | .                  | . | . |
| .            | .                  | .                  | .                  | . | . |
| Vv08g1188    | .                  | Gorai.006G152000.1 | Gorai.002G237300.1 | . | . |
| .            | .                  | Vv0Unrg8961        | .                  | . | . |
| .            | .                  | .                  | .                  | . | . |
| .            | .                  | .                  | .                  | . | . |
| Vv08g1189    | .                  | Gorai.006G152100.1 | Gorai.002G237400.1 | . | . |
| .            | .                  | .                  | .                  | . | . |
| .            | .                  | .                  | .                  | . | . |
| .            | .                  | .                  | .                  | . | . |
| Vv08g1190    | Tc05_g010650       | Gorai.006G152200.1 | Gorai.             | . | . |
| 002G237500.1 | .                  | .                  | .                  | . | . |
| .            | .                  | .                  | .                  | . | . |
| .            | .                  | .                  | .                  | . | . |
| Vv08g1191    | Tc05_g010580       | Gorai.006G152300.1 | Gorai.             | . | . |
| 002G237600.1 | .                  | .                  | .                  | . | . |
| .            | .                  | .                  | .                  | . | . |
| .            | .                  | .                  | .                  | . | . |
| Vv08g1192    | .                  | .                  | Gorai.009G398600.1 | . | . |
| .            | .                  | .                  | .                  | . | . |
| .            | .                  | .                  | .                  | . | . |
| Vv08g1193    | Tc05_g010520       | .                  | .                  | . | . |
| .            | .                  | .                  | .                  | . | . |
| .            | .                  | .                  | .                  | . | . |
| Vv08g1194    | .                  | .                  | .                  | . | . |
| .            | .                  | .                  | .                  | . | . |
| .            | .                  | .                  | .                  | . | . |
| Vv08g1195    | Tc05_g010500       | .                  | Gorai.002G237700.1 | . | . |

|                    |                    |                    |                    |                    |                    |        |   |
|--------------------|--------------------|--------------------|--------------------|--------------------|--------------------|--------|---|
| .                  | .                  | .                  | .                  | .                  | .                  | .      | . |
| .                  | .                  | .                  | .                  | .                  | .                  | .      | . |
| Vv08g1196          | Tc05_g010490       | .                  | .                  | .                  | .                  | Gorai. | . |
| 009G398800.1       | Vv0Unrg8971        | .                  | .                  | .                  | .                  | .      | . |
| .                  | .                  | .                  | .                  | .                  | .                  | .      | . |
| Vv08g1197          | Tc05_g010480       | .                  | .                  | Gorai.002G237800.1 | .                  | .      | . |
| .                  | .                  | .                  | .                  | .                  | .                  | .      | . |
| Vv08g1198          | Tc05_g010460       | Gorai.006G152400.1 | .                  | .                  | .                  | Gorai. | . |
| 002G237900.1       | Gorai.009G399000.1 | .                  | .                  | .                  | .                  | .      | . |
| .                  | .                  | .                  | .                  | .                  | .                  | .      | . |
| Vv08g1199          | .                  | .                  | .                  | .                  | .                  | .      | . |
| .                  | .                  | .                  | .                  | .                  | .                  | .      | . |
| Vv08g1200          | Tc05_g010390       | Gorai.006G152600.1 | .                  | .                  | .                  | Gorai. | . |
| 002G238000.1       | .                  | Vv06g0798          | .                  | .                  | .                  | .      | . |
| Tc09_g029660       | Gorai.001G116900.1 | .                  | .                  | .                  | .                  | .      | . |
| Gorai.006G105300.1 | Vv13g0077          | Tc10_g001320       | .                  | .                  | .                  | .      | . |
| .                  | Gorai.012G077500.1 | .                  | .                  | .                  | .                  | .      | . |
| Vv08g1201          | Tc05_g010380       | .                  | .                  | .                  | .                  | .      | . |
| .                  | .                  | .                  | .                  | .                  | .                  | .      | . |
| Vv08g1202          | .                  | .                  | .                  | .                  | Gorai.009G399100.1 | .      | . |
| .                  | .                  | .                  | .                  | .                  | .                  | .      | . |
| Vv08g1203          | Tc05_g010360       | .                  | .                  | .                  | .                  | Gorai. | . |
| 009G399200.1       | Vv0Unrg8973        | .                  | .                  | .                  | .                  | .      | . |
| .                  | .                  | .                  | .                  | .                  | .                  | .      | . |
| Vv08g1204          | .                  | Gorai.006G152700.1 | .                  | .                  | .                  | .      | . |
| .                  | .                  | .                  | .                  | .                  | .                  | .      | . |
| Vv08g1205          | .                  | Gorai.006G152800.1 | .                  | .                  | .                  | .      | . |
| Gorai.009G399300.1 | .                  | Gorai.007G367700.1 | .                  | Vv0Unrg8979        | .                  | .      | . |
| .                  | .                  | .                  | .                  | .                  | .                  | .      | . |
| Vv08g1206          | .                  | .                  | .                  | Gorai.002G157700.1 | .                  | .      | . |
| Gorai.009G399600.1 | Gorai.007G367800.1 | .                  | Vv0Unrg8981        | .                  | .                  | .      | . |
| .                  | .                  | .                  | .                  | .                  | .                  | .      | . |
| Vv08g1207          | .                  | .                  | .                  | .                  | Gorai.009G399700.1 | .      | . |
| .                  | Vv0Unrg8982        | .                  | .                  | .                  | .                  | .      | . |
| Vv08g1208          | .                  | .                  | Gorai.002G238100.1 | .                  | .                  | .      | . |
| .                  | .                  | .                  | .                  | .                  | .                  | .      | . |
| Vv18g1285          | .                  | .                  | .                  | .                  | .                  | .      | . |
| Vv08g1209          | .                  | .                  | Gorai.002G238200.1 | .                  | .                  | .      | . |
| Gorai.007G367900.1 | .                  | .                  | .                  | .                  | .                  | .      | . |

|                    |                    |                    |                    |   |                    |   |   |
|--------------------|--------------------|--------------------|--------------------|---|--------------------|---|---|
| .                  | .                  | .                  | .                  | . | .                  | . | . |
| .                  | .                  | .                  | .                  | . | .                  | . | . |
| Vv08g1210          | .                  | .                  | .                  | . | .                  | . | . |
| .                  | .                  | .                  | .                  | . | .                  | . | . |
| Vv08g1211          | .                  | .                  | .                  | . | Gorai.009G399800.1 | . | . |
| .                  | .                  | .                  | .                  | . | .                  | . | . |
| Vv08g1212          | .                  | .                  | .                  | . | .                  | . | . |
| .                  | .                  | .                  | .                  | . | .                  | . | . |
| Vv08g1213          | .                  | .                  | .                  | . | .                  | . | . |
| .                  | .                  | .                  | .                  | . | .                  | . | . |
| Vv08g1214          | Tc05_g009810       | .                  | Gorai.002G238300.1 | . | .                  | . | . |
| .                  | Vv0Unrg8988        | .                  | .                  | . | .                  | . | . |
| .                  | .                  | .                  | .                  | . | .                  | . | . |
| Vv08g1215          | Tc05_g009680       | .                  | .                  | . | .                  | . | . |
| Vv0Unrg8993        | .                  | .                  | .                  | . | .                  | . | . |
| .                  | .                  | .                  | .                  | . | .                  | . | . |
| Vv08g1216          | Tc05_g009640       | Gorai.006G153000.1 | .                  | . | .                  | . | . |
| Gorai.009G400000.1 | .                  | .                  | .                  | . | .                  | . | . |
| .                  | .                  | .                  | .                  | . | .                  | . | . |
| Vv08g1217          | Tc05_g009630       | Gorai.006G153100.1 | .                  | . | .                  | . | . |
| .                  | .                  | .                  | .                  | . | .                  | . | . |
| Vv08g1218          | .                  | Gorai.002G238500.1 | .                  | . | .                  | . | . |
| .                  | .                  | .                  | .                  | . | .                  | . | . |
| Vv08g1219          | .                  | .                  | .                  | . | .                  | . | . |
| .                  | .                  | .                  | .                  | . | .                  | . | . |
| Vv08g1220          | Tc05_g009610       | .                  | .                  | . | Gorai.             | . | . |
| 009G400100.1       | .                  | .                  | .                  | . | .                  | . | . |
| .                  | .                  | .                  | .                  | . | .                  | . | . |
| Vv08g1221          | Tc05_g009600       | .                  | .                  | . | Gorai.             | . | . |
| 009G400200.1       | .                  | .                  | .                  | . | .                  | . | . |
| .                  | .                  | .                  | .                  | . | .                  | . | . |
| Vv08g1222          | Tc05_g009590       | Gorai.006G153200.1 | .                  | . | .                  | . | . |
| Gorai.002G158100.1 | Gorai.009G400400.1 | Gorai.007G368100.1 | .                  | . | .                  | . | . |
| Vv0Unrg8994        | .                  | .                  | .                  | . | .                  | . | . |
| .                  | .                  | .                  | .                  | . | .                  | . | . |
| Vv08g1223          | Tc05_g009560       | Gorai.006G153300.1 | .                  | . | .                  | . | . |
| .                  | .                  | .                  | .                  | . | .                  | . | . |
| Vv08g1224          | .                  | .                  | .                  | . | .                  | . | . |
| .                  | .                  | .                  | .                  | . | .                  | . | . |
| .                  | .                  | .                  | .                  | . | .                  | . | . |

|                    |                    |                    |                    |        |   |   |
|--------------------|--------------------|--------------------|--------------------|--------|---|---|
| Vv08g1225          | Tc05_g009520       | .                  | .                  | .      | . | . |
| .                  | .                  | .                  | .                  | .      | . | . |
| Vv08g1226          | .                  | .                  | .                  | .      | . | . |
| .                  | .                  | .                  | .                  | .      | . | . |
| Vv08g1227          | Tc05_g009490       | .                  | .                  | .      | . | . |
| .                  | .                  | .                  | .                  | .      | . | . |
| Vv08g1228          | Tc05_g009430       | Gorai.006G153700.1 |                    | Gorai. |   | . |
| 002G238600.1       | .                  | Gorai.009G400500.1 | .                  | .      | . | . |
| .                  | .                  | .                  | .                  | .      | . | . |
| Vv08g1229          | .                  | .                  | .                  | .      | . | . |
| .                  | .                  | .                  | .                  | .      | . | . |
| Vv08g1230          | Tc05_g009390       | .                  | Gorai.002G238700.1 | .      | . | . |
| .                  | .                  | .                  | .                  | .      | . | . |
| Vv08g1231          | Tc05_g009380       | Gorai.006G153900.1 |                    | Gorai. |   | . |
| 002G238800.1       | .                  | .                  | .                  | .      | . | . |
| .                  | .                  | Vv18g1304          | Tc08_g003800       | .      | . | . |
| .                  | Gorai.009G193700.1 | .                  | .                  | .      | . | . |
| Vv08g1232          | .                  | .                  | .                  | .      | . | . |
| .                  | .                  | .                  | .                  | .      | . | . |
| Vv08g1233          | Tc05_g009360       | Gorai.006G154100.1 |                    | .      | . | . |
| .                  | .                  | .                  | .                  | .      | . | . |
| Vv08g1234          | Tc05_g009350       | Gorai.006G154200.1 |                    | .      | . | . |
| Gorai.009G400800.1 | .                  | .                  | .                  | .      | . | . |
| .                  | .                  | .                  | .                  | .      | . | . |
| Vv08g1235          | Tc05_g009340       | Gorai.006G154300.1 |                    | .      | . | . |
| Gorai.009G400900.1 | .                  | .                  | .                  | .      | . | . |
| .                  | .                  | .                  | .                  | .      | . | . |
| Vv08g1236          | .                  | .                  | .                  | .      | . | . |
| .                  | .                  | .                  | .                  | .      | . | . |
| Vv08g1237          | Tc05_g009300       | Gorai.006G154400.1 |                    | Gorai. |   | . |
| 002G238900.1       | .                  | Gorai.009G401000.1 | .                  | .      | . | . |
| .                  | .                  | .                  | .                  | .      | . | . |
| Vv08g1238          | Tc05_g009290       | Gorai.006G154600.1 |                    | Gorai. |   | . |
| 002G239000.1       | .                  | Vv0Unrg9004        | .                  | .      | . | . |
| .                  | .                  | .                  | .                  | .      | . | . |
| Vv08g1239          | Tc05_g009270       | .                  | .                  | .      | . | . |
| .                  | .                  | .                  | .                  | .      | . | . |

|                    |                    |                    |        |   |
|--------------------|--------------------|--------------------|--------|---|
| Vv08g1240          | Tc05_g009260       | Gorai.006G154700.1 | .      | . |
|                    | Gorai.009G401100.1 | .                  | .      | . |
| .                  | .                  | .                  | .      | . |
| Vv08g1241          | Tc05_g009250       | .                  | .      | . |
| .                  | .                  | .                  | .      | . |
| Vv08g1242          | .                  | .                  | .      | . |
| .                  | .                  | .                  | .      | . |
| Vv08g1243          | Tc05_g009230       | Gorai.002G239200.1 | .      | . |
|                    | Gorai.009G401300.1 | .                  | .      | . |
| .                  | .                  | .                  | .      | . |
| Vv08g1244          | Tc05_g009210       | Gorai.002G239400.1 | .      | . |
|                    | Gorai.009G401400.1 | .                  | .      | . |
| .                  | .                  | .                  | .      | . |
| Vv08g1245          | .                  | .                  | .      | . |
| .                  | .                  | .                  | .      | . |
| Vv08g1246          | Tc05_g009180       | Gorai.006G155000.1 | Gorai. | . |
| 002G239600.1       | Gorai.009G401500.1 | .                  | .      | . |
| .                  | .                  | .                  | .      | . |
| Vv08g1247          | Tc05_g009170       | .                  | Gorai. | . |
| 009G401600.1       | .                  | .                  | .      | . |
| .                  | .                  | .                  | .      | . |
| Vv08g1248          | Tc05_g009130       | Gorai.002G239700.1 | .      | . |
| .                  | .                  | .                  | .      | . |
| .                  | Vv18g1318          | Tc08_g003940       | .      | . |
| Gorai.009G193000.1 | .                  | .                  | .      | . |
| Vv08g1249          | Tc05_g009100       | .                  | Gorai. | . |
| 009G402400.1       | .                  | .                  | .      | . |
| .                  | .                  | .                  | .      | . |
| Vv08g1250          | Tc05_g009090       | .                  | Gorai. | . |
| 009G402500.1       | .                  | .                  | .      | . |
| .                  | .                  | .                  | .      | . |
| Vv08g1251          | Tc05_g009070       | .                  | Gorai. | . |
| 009G402800.1       | .                  | .                  | .      | . |
| .                  | .                  | .                  | .      | . |
| Vv08g1252          | .                  | .                  | .      | . |
| .                  | .                  | .                  | .      | . |
| Vv08g1253          | Tc05_g009050       | Gorai.002G158300.1 | .      | . |
| .                  | .                  | .                  | .      | . |
| .                  | .                  | .                  | .      | . |
| Vv08g1254          | Tc05_g009040       | Gorai.002G239900.1 | .      | . |
| Gorai.002G158400.1 | .                  | .                  | .      | . |

|                    |                    |   |   |                    |                    |        |   |
|--------------------|--------------------|---|---|--------------------|--------------------|--------|---|
| .                  | .                  | . | . | .                  | .                  | .      | . |
| .                  | .                  | . | . | .                  | .                  | .      | . |
| Vv08g1255          | Tc05_g009030       | . | . | .                  | .                  | .      | . |
| Vv0Unrg9023        | .                  | . | . | .                  | .                  | .      | . |
| .                  | .                  | . | . | .                  | .                  | .      | . |
| Vv08g1256          | .                  | . | . | .                  | .                  | .      | . |
| Vv0Unrg9024        | .                  | . | . | .                  | .                  | .      | . |
| .                  | .                  | . | . | .                  | .                  | .      | . |
| Vv08g1257          | .                  | . | . | .                  | .                  | .      | . |
| .                  | .                  | . | . | .                  | .                  | .      | . |
| .                  | .                  | . | . | .                  | .                  | .      | . |
| Vv08g1258          | .                  | . | . | .                  | .                  | .      | . |
| .                  | .                  | . | . | .                  | .                  | .      | . |
| Vv08g1259          | .                  | . | . | .                  | .                  | .      | . |
| .                  | .                  | . | . | .                  | .                  | .      | . |
| .                  | .                  | . | . | .                  | .                  | .      | . |
| Vv08g1260          | .                  | . | . | .                  | .                  | .      | . |
| .                  | .                  | . | . | .                  | .                  | .      | . |
| .                  | .                  | . | . | .                  | .                  | .      | . |
| Vv08g1261          | Tc05_g008950       | . | . | Gorai.002G240100.1 | .                  | .      | . |
| .                  | .                  | . | . | .                  | .                  | .      | . |
| Vv08g1262          | Tc05_g008940       | . | . | Gorai.002G240200.1 | .                  | .      | . |
| Gorai.009G403000.1 | .                  | . | . | .                  | .                  | .      | . |
| .                  | .                  | . | . | .                  | .                  | .      | . |
| .                  | .                  | . | . | .                  | .                  | .      | . |
| Vv08g1263          | Tc05_g008930       | . | . | Gorai.002G240300.1 | .                  | .      | . |
| .                  | .                  | . | . | .                  | .                  | .      | . |
| .                  | .                  | . | . | .                  | .                  | .      | . |
| Vv08g1264          | Tc05_g008920       | . | . | Gorai.006G155300.1 | .                  | .      | . |
| .                  | Gorai.007G368400.1 | . | . | .                  | .                  | .      | . |
| .                  | .                  | . | . | .                  | .                  | .      | . |
| .                  | .                  | . | . | .                  | .                  | .      | . |
| Vv08g1265          | .                  | . | . | Gorai.002G240400.1 | .                  | .      | . |
| .                  | .                  | . | . | .                  | .                  | .      | . |
| .                  | .                  | . | . | .                  | .                  | .      | . |
| Vv08g1266          | Tc05_g008890       | . | . | Gorai.006G155500.1 | .                  | .      | . |
| Gorai.009G403300.1 | .                  | . | . | .                  | .                  | .      | . |
| .                  | .                  | . | . | .                  | .                  | .      | . |
| .                  | .                  | . | . | .                  | .                  | .      | . |
| Vv08g1267          | .                  | . | . | .                  | .                  | .      | . |
| Vv0Unrg9031        | .                  | . | . | .                  | .                  | .      | . |
| .                  | .                  | . | . | .                  | .                  | .      | . |
| Vv08g1268          | Tc05_g008870       | . | . | Gorai.006G155600.1 | .                  | Gorai. | . |
| 002G240500.1       | .                  | . | . | Vv0Unrg9034        | .                  | .      | . |
| .                  | .                  | . | . | Vv18g1339          | .                  | .      | . |
| Tc08_g004010       | Gorai.002G122200.1 | . | . | .                  | Gorai.009G192500.1 | .      | . |
| .                  | .                  | . | . | .                  | .                  | .      | . |
| Vv08g1269          | Tc05_g008860       | . | . | Gorai.006G155700.1 | .                  | .      | . |



|           |              |                    |                    |                    |
|-----------|--------------|--------------------|--------------------|--------------------|
| Vv08g1270 | Tc05_g008810 | Gorai.002G158600.1 | Gorai.009G403700.1 | Vv0Unrg9036        |
| Vv08g1271 | Tc05_g008760 | Gorai.006G155800.1 | Gorai.009G403800.1 | Vv0Unrg9043        |
| Vv08g1272 | Tc05_g008730 | Gorai.002G240700.1 | Gorai.002G158800.1 |                    |
| Vv08g1273 | Tc05_g008720 | Gorai.006G155900.1 | Gorai.009G404000.1 |                    |
| Vv08g1274 |              |                    |                    |                    |
| Vv08g1275 | Tc05_g008650 |                    |                    |                    |
| Vv08g1276 | Tc05_g008630 |                    |                    |                    |
| Vv08g1277 | Tc05_g008620 | Gorai.006G156100.1 | Gorai.009G404200.1 |                    |
| Vv08g1278 |              |                    |                    |                    |
| Vv08g1279 | Tc05_g008610 | Gorai.006G156200.1 | Gorai.002G240900.1 | Gorai.009G404700.1 |
| Vv08g1280 |              |                    |                    | Gorai.009G404800.1 |
| Vv08g1281 |              |                    |                    |                    |
| Vv08g1282 |              |                    |                    |                    |
| Vv08g1283 |              |                    |                    |                    |

|                    |   |                    |   |   |                    |   |   |
|--------------------|---|--------------------|---|---|--------------------|---|---|
| Vv08g1284          | . | .                  | . | . | .                  | . | . |
| .                  | . | .                  | . | . | .                  | . | . |
| Vv08g1285          | . | .                  | . | . | .                  | . | . |
| .                  | . | .                  | . | . | .                  | . | . |
| Vv08g1286          | . | .                  | . | . | .                  | . | . |
| .                  | . | .                  | . | . | .                  | . | . |
| Vv08g1287          | . | .                  | . | . | .                  | . | . |
| .                  | . | .                  | . | . | .                  | . | . |
| Vv08g1288          | . | .                  | . | . | .                  | . | . |
| Vv13g0904          | . | .                  | . | . | .                  | . | . |
| .                  | . | .                  | . | . | .                  | . | . |
| Vv08g1289          | . | .                  | . | . | .                  | . | . |
| .                  | . | .                  | . | . | .                  | . | . |
| Vv08g1290          | . | .                  | . | . | Gorai.002G158900.1 | . | . |
| Gorai.007G370500.1 | . | .                  | . | . | .                  | . | . |
| .                  | . | .                  | . | . | .                  | . | . |
| Vv08g1291          | . | .                  | . | . | Gorai.009G405400.1 | . | . |
| .                  | . | .                  | . | . | .                  | . | . |
| Vv08g1292          | . | .                  | . | . | .                  | . | . |
| .                  | . | .                  | . | . | .                  | . | . |
| Vv08g1293          | . | Gorai.006G156400.1 | . | . | Gorai.002G241100.1 | . | . |
| .                  | . | .                  | . | . | .                  | . | . |
| .                  | . | .                  | . | . | .                  | . | . |
| Vv08g1294          | . | .                  | . | . | .                  | . | . |
| .                  | . | .                  | . | . | .                  | . | . |
| Vv08g1295          | . | .                  | . | . | .                  | . | . |
| .                  | . | .                  | . | . | .                  | . | . |
| Vv08g1296          | . | .                  | . | . | .                  | . | . |
| .                  | . | .                  | . | . | .                  | . | . |
| Vv08g1297          | . | .                  | . | . | .                  | . | . |
| .                  | . | .                  | . | . | .                  | . | . |
| Vv08g1298          | . | .                  | . | . | .                  | . | . |
| .                  | . | .                  | . | . | .                  | . | . |
| Vv08g1299          | . | .                  | . | . | Gorai.009G406100.1 | . | . |
| .                  | . | .                  | . | . | .                  | . | . |
| .                  | . | .                  | . | . | .                  | . | . |

|                    |                    |                    |                    |                    |        |   |   |
|--------------------|--------------------|--------------------|--------------------|--------------------|--------|---|---|
| Vv08g1300          | .                  | .                  | .                  | .                  | .      | . | . |
| .                  | .                  | .                  | .                  | .                  | .      | . | . |
| Vv08g1301          | .                  | .                  | .                  | .                  | .      | . | . |
| Gorai.009G406400.1 | .                  | .                  | Gorai.002G241400.1 | .                  | .      | . | . |
| .                  | .                  | .                  | .                  | .                  | .      | . | . |
| Vv08g1302          | .                  | .                  | Gorai.006G157300.1 | .                  | .      | . | . |
| Gorai.009G406500.1 | .                  | .                  | .                  | .                  | .      | . | . |
| .                  | .                  | .                  | .                  | .                  | .      | . | . |
| Vv08g1303          | .                  | .                  | Gorai.006G157400.1 | Gorai.002G241500.1 | .      | . | . |
| .                  | .                  | .                  | Vv13g0874          | .                  | .      | . | . |
| .                  | .                  | .                  | .                  | .                  | .      | . | . |
| Vv08g1304          | .                  | .                  | Gorai.006G157500.1 | Gorai.002G241600.1 | .      | . | . |
| Gorai.002G159100.1 | .                  | .                  | .                  | .                  | .      | . | . |
| .                  | .                  | .                  | .                  | .                  | .      | . | . |
| Vv08g1305          | Tc05_g008570       | .                  | .                  | .                  | Gorai. | . | . |
| 009G406900.1       | .                  | .                  | .                  | .                  | .      | . | . |
| Vv08g1306          | Tc05_g008520       | .                  | Gorai.002G241800.1 | .                  | .      | . | . |
| Gorai.002G159400.1 | Gorai.009G407200.1 | .                  | .                  | .                  | .      | . | . |
| .                  | .                  | .                  | .                  | .                  | .      | . | . |
| Vv08g1307          | Tc05_g008470       | .                  | Gorai.002G242000.1 | .                  | .      | . | . |
| Gorai.002G159600.1 | .                  | .                  | Vv02g0331          | .                  | .      | . | . |
| .                  | Gorai.008G262400.1 | .                  | .                  | .                  | .      | . | . |
| Vv08g1308          | Tc05_g008450       | .                  | Gorai.002G242100.1 | .                  | .      | . | . |
| Gorai.009G407400.1 | .                  | .                  | .                  | .                  | .      | . | . |
| .                  | .                  | .                  | .                  | .                  | .      | . | . |
| Vv08g1309          | Tc05_g008440       | .                  | Gorai.002G242200.1 | .                  | .      | . | . |
| Gorai.002G159700.1 | .                  | .                  | .                  | .                  | .      | . | . |
| .                  | .                  | .                  | .                  | .                  | .      | . | . |
| Vv08g1310          | .                  | .                  | .                  | .                  | .      | . | . |
| .                  | .                  | .                  | .                  | .                  | .      | . | . |
| Vv08g1311          | Tc05_g008420       | Gorai.006G157800.1 | .                  | .                  | .      | . | . |
| .                  | .                  | .                  | .                  | .                  | .      | . | . |
| Vv08g1312          | .                  | .                  | .                  | .                  | .      | . | . |
| .                  | .                  | .                  | .                  | .                  | .      | . | . |
| Vv08g1313          | .                  | .                  | .                  | Gorai.009G407700.1 | .      | . | . |
| .                  | .                  | .                  | .                  | .                  | .      | . | . |
| .                  | .                  | .                  | .                  | .                  | .      | . | . |

|           |                    |                    |                    |                    |                    |   |
|-----------|--------------------|--------------------|--------------------|--------------------|--------------------|---|
| Vv08g1314 | .                  | .                  | .                  | .                  | Gorai.009G407800.1 | . |
| .         | .                  | .                  | .                  | .                  | .                  | . |
| Vv08g1315 | Tc05_g008330       | .                  | .                  | Gorai.002G242600.1 | .                  | . |
| .         | .                  | .                  | .                  | .                  | .                  | . |
| Vv08g1316 | .                  | Gorai.006G158000.1 | .                  | .                  | .                  | . |
| .         | .                  | .                  | .                  | .                  | .                  | . |
| Vv08g1317 | .                  | .                  | .                  | .                  | .                  | . |
| .         | .                  | .                  | .                  | .                  | .                  | . |
| Vv08g1318 | Tc05_g008290       | Gorai.006G158300.1 | .                  | .                  | .                  | . |
| .         | Gorai.009G408300.1 | .                  | .                  | .                  | .                  | . |
| .         | .                  | .                  | .                  | .                  | .                  | . |
| Vv08g1319 | .                  | .                  | .                  | .                  | .                  | . |
| .         | .                  | .                  | .                  | .                  | .                  | . |
| Vv08g1320 | Tc05_g008270       | .                  | .                  | Gorai.002G242700.1 | .                  | . |
| .         | .                  | .                  | .                  | .                  | .                  | . |
| Vv08g1321 | .                  | .                  | Gorai.002G242900.1 | .                  | .                  | . |
| .         | .                  | .                  | .                  | .                  | .                  | . |
| Vv08g1322 | Tc05_g008240       | Gorai.002G243000.1 | .                  | .                  | .                  | . |
| .         | Gorai.007G371300.1 | .                  | .                  | .                  | .                  | . |
| .         | .                  | .                  | .                  | .                  | .                  | . |
| Vv08g1323 | .                  | .                  | .                  | .                  | .                  | . |
| .         | .                  | .                  | .                  | .                  | .                  | . |
| Vv08g1324 | .                  | .                  | .                  | .                  | .                  | . |
| .         | .                  | .                  | .                  | .                  | .                  | . |
| Vv08g1325 | .                  | .                  | .                  | .                  | .                  | . |
| .         | .                  | .                  | .                  | .                  | .                  | . |
| Vv08g1326 | Tc05_g008230       | Gorai.006G158500.1 | .                  | .                  | .                  | . |
| .         | .                  | .                  | .                  | .                  | .                  | . |
| Vv08g1327 | .                  | .                  | Gorai.002G243100.1 | .                  | .                  | . |
| .         | .                  | .                  | .                  | .                  | .                  | . |
| Vv08g1328 | Tc05_g008220       | Gorai.002G243200.1 | .                  | .                  | .                  | . |
| .         | .                  | .                  | .                  | .                  | .                  | . |
| Vv08g1329 | Tc05_g008210       | Gorai.002G243300.1 | .                  | .                  | .                  | . |
| .         | .                  | .                  | .                  | .                  | .                  | . |
| .         | .                  | .                  | .                  | .                  | .                  | . |

|                    |                    |                    |                    |   |
|--------------------|--------------------|--------------------|--------------------|---|
| Vv08g1330          | Tc05_g008200       | .                  | Gorai.002G243400.1 | . |
| .                  | .                  | .                  | .                  | . |
| .                  | Vv13g0848          | .                  | .                  | . |
| .                  | .                  | .                  | .                  | . |
| Vv08g1331          | Tc05_g008190       | Gorai.006G158600.1 | .                  | . |
| Gorai.009G408700.1 | .                  | .                  | .                  | . |
| .                  | .                  | .                  | .                  | . |
| .                  | .                  | .                  | .                  | . |
| Vv08g1332          | Tc05_g008180       | .                  | .                  | . |
| .                  | .                  | .                  | .                  | . |
| .                  | .                  | .                  | .                  | . |
| Vv08g1333          | .                  | .                  | .                  | . |
| .                  | .                  | .                  | .                  | . |
| .                  | .                  | .                  | .                  | . |
| Vv08g1334          | Tc05_g008170       | Gorai.006G158700.1 | .                  | . |
| Gorai.002G160000.1 | Gorai.009G408800.1 | .                  | Vv02g0370          | . |
| Tc03_g027340       | Gorai.004G161300.1 | .                  | Gorai.             | . |
| 007G098600.1       | Gorai.008G246700.1 | .                  | .                  | . |
| .                  | .                  | .                  | .                  | . |
| Vv08g1335          | Tc05_g008160       | .                  | Gorai.002G243500.1 | . |
| .                  | .                  | .                  | .                  | . |
| .                  | .                  | .                  | .                  | . |
| Vv08g1336          | .                  | .                  | .                  | . |
| .                  | .                  | .                  | .                  | . |
| .                  | .                  | .                  | .                  | . |
| Vv08g1337          | Tc05_g008150       | .                  | .                  | . |
| Gorai.007G371400.1 | .                  | .                  | .                  | . |
| .                  | .                  | .                  | .                  | . |
| .                  | .                  | .                  | .                  | . |
| Vv08g1338          | Tc05_g008140       | .                  | .                  | . |
| .                  | .                  | .                  | .                  | . |
| .                  | .                  | .                  | .                  | . |
| Vv08g1339          | .                  | .                  | .                  | . |
| .                  | .                  | .                  | .                  | . |
| .                  | .                  | .                  | .                  | . |
| Vv08g1340          | .                  | .                  | .                  | . |
| .                  | .                  | .                  | .                  | . |
| .                  | .                  | .                  | .                  | . |
| Vv08g1341          | .                  | .                  | .                  | . |
| .                  | .                  | .                  | .                  | . |
| .                  | .                  | .                  | .                  | . |
| Vv08g1342          | Tc05_g008050       | .                  | .                  | . |
| .                  | .                  | .                  | .                  | . |
| .                  | .                  | .                  | .                  | . |
| Vv08g1343          | .                  | .                  | .                  | . |
| .                  | .                  | .                  | .                  | . |
| .                  | .                  | .                  | .                  | . |
| Vv08g1344          | .                  | .                  | .                  | . |
| .                  | .                  | .                  | .                  | . |
| .                  | .                  | .                  | .                  | . |
| Vv08g1345          | .                  | .                  | .                  | . |

|                    |              |                    |                    |        |        |
|--------------------|--------------|--------------------|--------------------|--------|--------|
| .                  | .            | .                  | .                  | .      | .      |
| .                  | .            | .                  | .                  | .      | .      |
| Vv08g1346          | Tc05_g008040 | .                  | .                  | .      | .      |
| .                  | .            | .                  | .                  | .      | .      |
| .                  | .            | .                  | .                  | .      | .      |
| Vv08g1347          | .            | .                  | .                  | .      | .      |
| .                  | .            | .                  | .                  | .      | .      |
| .                  | .            | .                  | .                  | .      | .      |
| Vv08g1348          | Tc05_g008030 | .                  | .                  | .      | Gorai. |
| 009G409200.1       | .            | .                  | .                  | .      | .      |
| .                  | .            | .                  | .                  | .      | .      |
| Vv08g1349          | Tc05_g008020 | .                  | .                  | .      | Gorai. |
| 009G409300.1       | .            | .                  | .                  | .      | .      |
| .                  | .            | .                  | .                  | .      | .      |
| Vv08g1350          | Tc05_g008010 | .                  | Gorai.002G243600.1 | .      | .      |
| .                  | .            | .                  | .                  | .      | .      |
| .                  | .            | .                  | .                  | .      | .      |
| Vv08g1351          | Tc05_g008000 | .                  | .                  | .      | .      |
| Gorai.007G371500.1 | .            | .                  | .                  | .      | .      |
| .                  | Vv13g0820    | .                  | .                  | .      | .      |
| .                  | .            | .                  | .                  | .      | .      |
| Vv08g1352          | Tc05_g007990 | Gorai.006G158900.1 | .                  | Gorai. | .      |
| 002G243700.1       | .            | .                  | .                  | .      | .      |
| .                  | .            | Vv13g0815          | .                  | .      | .      |
| Gorai.011G233000.1 | .            | .                  | .                  | .      | .      |
| Vv08g1353          | .            | Gorai.002G243800.1 | .                  | .      | .      |
| .                  | .            | .                  | .                  | .      | .      |
| .                  | Vv13g0812    | .                  | .                  | .      | .      |
| Vv08g1354          | Tc05_g007980 | Gorai.006G159000.1 | .                  | Gorai. | .      |
| 002G243900.1       | .            | .                  | .                  | .      | .      |
| .                  | .            | .                  | .                  | .      | .      |
| .                  | .            | .                  | .                  | .      | .      |
| Vv08g1355          | Tc05_g007960 | Gorai.006G159200.1 | .                  | .      | .      |
| Gorai.009G409500.1 | .            | .                  | .                  | .      | .      |
| .                  | .            | .                  | .                  | .      | .      |
| .                  | .            | .                  | .                  | .      | .      |
| Vv08g1356          | Tc05_g007950 | .                  | Gorai.002G244200.1 | .      | .      |
| Gorai.009G409600.1 | .            | .                  | .                  | .      | .      |
| .                  | .            | .                  | .                  | .      | .      |
| .                  | .            | .                  | .                  | .      | .      |
| Vv08g1357          | Tc05_g007940 | Gorai.006G159400.1 | .                  | Gorai. | .      |
| 002G244300.1       | .            | Gorai.007G371600.1 | .                  | .      | .      |
| .                  | .            | .                  | Vv13g0805          | .      | .      |
| .                  | .            | .                  | .                  | .      | .      |
| Vv08g1358          | Tc05_g007930 | .                  | Gorai.002G244400.1 | .      | .      |
| Gorai.009G409800.1 | .            | .                  | .                  | .      | .      |
| .                  | .            | .                  | .                  | .      | .      |
| .                  | .            | .                  | .                  | .      | .      |
| Vv08g1359          | .            | .                  | .                  | .      | .      |
| .                  | .            | .                  | .                  | .      | .      |

|                    |                    |                    |                    |                    |
|--------------------|--------------------|--------------------|--------------------|--------------------|
| Vv08g1360          | Tc05_g007920       | .                  | .                  | Gorai.002G160300.1 |
|                    | Gorai.009G410000.1 | .                  | .                  | .                  |
| .                  | .                  | .                  | .                  | .                  |
| Vv08g1361          | Tc05_g007830       | .                  | .                  | .                  |
| .                  | .                  | .                  | .                  | .                  |
| Vv08g1362          | Tc05_g007810       | Gorai.006G159600.1 | Gorai.             | .                  |
| 002G244600.1       | .                  | Vv02g0373          | .                  | .                  |
| Tc03_g027310       | Gorai.004G211300.1 | .                  | Gorai.007G007000.1 | .                  |
| .                  | .                  | .                  | .                  | .                  |
| Vv08g1363          | .                  | .                  | .                  | .                  |
| .                  | .                  | .                  | .                  | .                  |
| Vv08g1364          | Tc05_g007790       | .                  | Gorai.002G244700.1 | .                  |
| .                  | .                  | .                  | .                  | .                  |
| Vv08g1365          | Tc05_g007780       | .                  | Gorai.002G245000.1 | .                  |
| .                  | .                  | .                  | .                  | .                  |
| Vv08g1366          | Tc05_g007760       | .                  | Gorai.002G245100.1 | .                  |
| .                  | .                  | .                  | .                  | .                  |
| Vv08g1367          | Tc05_g007750       | Gorai.006G159700.1 | .                  | .                  |
| Gorai.009G410200.1 | .                  | .                  | .                  | .                  |
| .                  | .                  | .                  | .                  | .                  |
| Vv08g1368          | .                  | .                  | Gorai.009G410300.1 | .                  |
| .                  | Vv02g0386          | Tc03_g027260       | .                  | .                  |
| Gorai.008G246100.1 | .                  | .                  | .                  | .                  |
| Vv08g1369          | Tc05_g007740       | Gorai.006G159800.1 | .                  | .                  |
| .                  | .                  | .                  | .                  | .                  |
| Vv08g1370          | Tc05_g007730       | .                  | Gorai.002G245200.1 | .                  |
| .                  | .                  | .                  | .                  | .                  |
| Vv08g1371          | Tc05_g007720       | .                  | .                  | .                  |
| .                  | .                  | .                  | .                  | .                  |
| Vv08g1372          | Tc05_g007710       | .                  | .                  | Gorai.             |
| 009G410400.1       | .                  | .                  | .                  | .                  |
| Vv08g1373          | Tc05_g007660       | .                  | .                  | Gorai.             |
| 009G410600.1       | Gorai.007G371700.1 | .                  | .                  | .                  |
| .                  | .                  | .                  | .                  | .                  |
| Vv08g1374          | Tc05_g007650       | .                  | Gorai.002G245300.1 | .                  |

|                    |                    |                    |                    |        |
|--------------------|--------------------|--------------------|--------------------|--------|
| .                  | .                  | Vv06g1686          | Tc09_g029200       | Gorai. |
| 013G259200.1       | Gorai.001G118500.1 | .                  | .                  | Gorai. |
| 006G103200.1       | .                  | .                  | .                  | .      |
| Vv08g1375          | .                  | .                  | .                  | .      |
| .                  | .                  | .                  | .                  | .      |
| Vv08g1376          | .                  | .                  | .                  | .      |
| .                  | .                  | .                  | .                  | .      |
| Vv08g1377          | .                  | .                  | .                  | .      |
| .                  | .                  | .                  | .                  | .      |
| Vv08g1378          | Tc05_g030100       | .                  | .                  | Gorai. |
| 009G410800.1       | .                  | .                  | .                  | .      |
| .                  | .                  | .                  | .                  | .      |
| Vv08g1379          | .                  | .                  | .                  | .      |
| .                  | .                  | .                  | .                  | .      |
| Vv08g1380          | Tc05_g007620       | .                  | .                  | .      |
| .                  | .                  | .                  | .                  | .      |
| Vv08g1381          | Tc05_g007610       | .                  | .                  | .      |
| .                  | .                  | .                  | .                  | .      |
| Vv08g1382          | Tc05_g007600       | .                  | .                  | .      |
| .                  | .                  | .                  | .                  | .      |
| Vv08g1383          | Tc05_g007590       | .                  | .                  | Gorai. |
| 009G410900.1       | .                  | .                  | .                  | .      |
| .                  | .                  | .                  | .                  | .      |
| Vv08g1384          | Tc05_g007580       | .                  | .                  | Gorai. |
| 009G411000.1       | Gorai.007G372100.1 | .                  | .                  | .      |
| .                  | .                  | .                  | .                  | .      |
| Vv08g1385          | .                  | .                  | .                  | .      |
| .                  | .                  | .                  | .                  | .      |
| Vv08g1386          | .                  | .                  | .                  | .      |
| Vv06g1671          | Tc09_g029270       | .                  | .                  | .      |
| Gorai.006G103700.1 | .                  | .                  | .                  | .      |
| .                  | .                  | .                  | .                  | .      |
| Vv08g1387          | Tc05_g030480       | .                  | .                  | .      |
| .                  | .                  | .                  | .                  | .      |
| Vv08g1388          | .                  | Gorai.002G245400.1 | .                  | .      |
| .                  | Vv06g1667          | .                  | Gorai.001G117500.1 | .      |
| .                  | Gorai.006G104200.1 | .                  | .                  | .      |
| .                  | .                  | .                  | .                  | .      |
| Vv08g1389          | .                  | Gorai.002G245500.1 | .                  | .      |
| .                  | Vv06g1666          | Tc09_g029370       | .                  | .      |



|              |                    |                    |                    |           |   |
|--------------|--------------------|--------------------|--------------------|-----------|---|
| .            | Gorai.006G158300.1 | .                  | .                  | .         | . |
| .            | .                  | .                  | .                  | .         | . |
| Vv08g1390    | .                  | .                  | .                  | .         | . |
| .            | .                  | .                  | .                  | .         | . |
| Vv08g1391    | Tc05_g007510       | .                  | .                  | .         | . |
| .            | .                  | .                  | .                  | .         | . |
| Vv08g1392    | .                  | .                  | .                  | .         | . |
| .            | .                  | .                  | .                  | .         | . |
| Tc10_g007710 | .                  | Gorai.011G233700.1 | .                  | Vv13g0774 | . |
| .            | .                  | .                  | .                  | .         | . |
| Vv08g1393    | .                  | .                  | .                  | .         | . |
| .            | .                  | .                  | .                  | .         | . |
| Vv08g1394    | Tc05_g007470       | .                  | .                  | .         | . |
| .            | .                  | .                  | .                  | .         | . |
| Vv08g1395    | .                  | .                  | .                  | .         | . |
| .            | .                  | .                  | .                  | .         | . |
| Vv08g1396    | .                  | .                  | .                  | .         | . |
| .            | .                  | .                  | .                  | .         | . |
| Vv08g1397    | Gorai.006G160000.1 | .                  | .                  | .         | . |
| .            | .                  | .                  | .                  | .         | . |
| Vv08g1398    | .                  | .                  | Gorai.009G411100.1 | .         | . |
| .            | .                  | .                  | .                  | .         | . |
| Vv08g1399    | Tc05_g007420       | .                  | .                  | .         | . |
| .            | .                  | .                  | .                  | .         | . |
| Vv08g1400    | .                  | .                  | .                  | .         | . |
| .            | .                  | .                  | .                  | .         | . |
| Vv08g1401    | Tc05_g007410       | Gorai.006G160700.1 | .                  | .         | . |
| .            | .                  | .                  | .                  | .         | . |
| Vv08g1402    | Tc05_g007400       | .                  | .                  | .         | . |
| .            | .                  | .                  | .                  | .         | . |
| Vv08g1403    | Tc05_g007390       | .                  | .                  | .         | . |
| .            | .                  | .                  | .                  | .         | . |
| Vv08g1404    | Tc05_g007330       | .                  | .                  | .         | . |
| .            | .                  | .                  | .                  | .         | . |
| Vv08g1405    | Tc05_g007280       | .                  | .                  | .         | . |
| .            | .                  | .                  | .                  | .         | . |

|                    |   |                    |   |   |                    |        |
|--------------------|---|--------------------|---|---|--------------------|--------|
| Vv08g1406          | . | .                  | . | . | .                  | Gorai. |
| 007G372400.1       | . | .                  | . | . | .                  | .      |
| Vv08g1407          | . | Gorai.006G160800.1 | . | . | .                  | .      |
| .                  | . | .                  | . | . | .                  | .      |
| Vv08g1408          | . | .                  | . | . | Gorai.009G412100.1 | .      |
| .                  | . | .                  | . | . | .                  | .      |
| Vv08g1409          | . | .                  | . | . | .                  | .      |
| .                  | . | .                  | . | . | .                  | .      |
| Vv08g1410          | . | .                  | . | . | .                  | .      |
| .                  | . | .                  | . | . | .                  | .      |
| Vv08g1411          | . | .                  | . | . | .                  | .      |
| .                  | . | .                  | . | . | .                  | .      |
| Vv08g1412          | . | .                  | . | . | .                  | .      |
| .                  | . | .                  | . | . | .                  | .      |
| Vv08g1413          | . | .                  | . | . | Gorai.009G412500.1 | .      |
| .                  | . | .                  | . | . | .                  | .      |
| Vv08g1414          | . | .                  | . | . | .                  | .      |
| .                  | . | .                  | . | . | .                  | .      |
| Vv08g1415          | . | .                  | . | . | Gorai.009G412600.1 | .      |
| .                  | . | .                  | . | . | .                  | .      |
| Vv08g1416          | . | Gorai.002G245600.1 | . | . | .                  | .      |
| Gorai.009G412700.1 | . | .                  | . | . | .                  | .      |
| .                  | . | .                  | . | . | .                  | .      |
| Vv08g1417          | . | Gorai.006G161000.1 | . | . | .                  | .      |
| .                  | . | .                  | . | . | .                  | .      |
| Vv08g1418          | . | .                  | . | . | .                  | .      |
| .                  | . | .                  | . | . | .                  | .      |
| Vv08g1419          | . | .                  | . | . | .                  | .      |
| .                  | . | .                  | . | . | .                  | .      |
| Vv08g1420          | . | .                  | . | . | .                  | .      |
| .                  | . | .                  | . | . | .                  | .      |
| Vv08g1421          | . | Gorai.002G245700.1 | . | . | .                  | .      |
| .                  | . | .                  | . | . | .                  | .      |
| .                  | . | .                  | . | . | .                  | .      |

|                    |                    |                    |                    |
|--------------------|--------------------|--------------------|--------------------|
| Vv08g1422          | .                  | Gorai.006G161200.1 | Gorai.002G245800.1 |
| .                  | .                  | Gorai.009G412900.1 | .                  |
| .                  | .                  | .                  | .                  |
| .                  | .                  | .                  | .                  |
| Vv08g1423          | .                  | Gorai.002G248400.1 | .                  |
| Gorai.009G413000.1 | .                  | Gorai.007G372700.1 | Vv06g1657          |
| .                  | .                  | .                  | .                  |
| .                  | .                  | .                  | .                  |
| Vv08g1424          | .                  | .                  | Gorai.009G413400.1 |
| .                  | .                  | Vv06g1655          | .                  |
| Gorai.003G146200.1 | .                  | .                  | .                  |
| .                  | .                  | .                  | .                  |
| Vv08g1425          | .                  | Gorai.002G246100.1 | .                  |
| Gorai.009G413500.1 | .                  | .                  | .                  |
| .                  | .                  | .                  | .                  |
| .                  | .                  | .                  | .                  |
| Vv08g1426          | .                  | .                  | Vv13g0732          |
| .                  | .                  | .                  | .                  |
| .                  | .                  | .                  | .                  |
| Vv08g1427          | .                  | .                  | .                  |
| .                  | .                  | .                  | .                  |
| .                  | .                  | .                  | .                  |
| Vv08g1428          | .                  | .                  | Gorai.009G413700.1 |
| Gorai.007G372800.1 | .                  | .                  | .                  |
| .                  | .                  | .                  | .                  |
| .                  | .                  | .                  | .                  |
| Vv08g1429          | .                  | Gorai.006G161400.1 | Gorai.002G246300.1 |
| .                  | .                  | Gorai.009G413800.1 | Gorai.007G372900.1 |
| .                  | .                  | .                  | Vv13g0733          |
| .                  | .                  | .                  | .                  |
| Vv08g1430          | Tc05_g007230       | Gorai.006G161600.1 | .                  |
| .                  | Vv06g1641          | .                  | .                  |
| Gorai.009G111200.1 | Gorai.006G161600.1 | .                  | Vv13g0737          |
| .                  | .                  | .                  | .                  |
| .                  | .                  | .                  | .                  |
| Vv08g1431          | .                  | .                  | .                  |
| .                  | .                  | .                  | .                  |
| .                  | .                  | .                  | .                  |
| Vv08g1432          | Tc05_g007220       | Gorai.006G161700.1 | .                  |
| .                  | .                  | .                  | .                  |
| .                  | .                  | .                  | .                  |
| Vv08g1433          | Tc05_g007210       | Gorai.006G161800.1 | Gorai.             |
| 002G246400.1       | Gorai.009G413900.1 | .                  | .                  |
| .                  | .                  | .                  | Vv13g0745          |
| .                  | .                  | .                  | .                  |
| .                  | .                  | .                  | .                  |
| Vv08g1434          | Tc05_g007200       | Gorai.006G162100.1 | .                  |
| Gorai.009G414000.1 | .                  | .                  | .                  |
| .                  | .                  | .                  | .                  |
| .                  | .                  | .                  | .                  |
| Vv08g1435          | Tc05_g007190       | Gorai.006G162200.1 | .                  |
| .                  | .                  | .                  | .                  |

|              |                    |                    |                    |        |
|--------------|--------------------|--------------------|--------------------|--------|
| Vv08g1436    | Tc05_g007180       | Gorai.006G162300.1 | .                  | .      |
| .            | .                  | .                  | .                  | .      |
| Vv08g1437    | Tc05_g007170       | Gorai.006G162400.1 | .                  | .      |
|              | Gorai.009G414100.1 | Gorai.007G373000.1 | Vv06g1636          | .      |
|              | Tc09_g009340       | .                  | Gorai.009G110900.1 | .      |
|              | Gorai.006G162400.1 | .                  | .                  | .      |
| Vv08g1438    | .                  | .                  | .                  | .      |
| .            | .                  | .                  | .                  | .      |
| Vv08g1439    | Tc05_g007150       | .                  | .                  | .      |
| .            | .                  | .                  | .                  | .      |
| Vv08g1440    | Tc05_g007140       | .                  | .                  | Gorai. |
| 009G414300.1 | .                  | .                  | .                  | .      |
| .            | .                  | .                  | .                  | .      |
| Vv08g1441    | Tc05_g007130       | Gorai.006G162600.1 | .                  | .      |
|              | Gorai.009G414400.1 | .                  | .                  | .      |
| .            | .                  | .                  | .                  | .      |
| Vv08g1442    | Tc05_g007120       | Gorai.006G162700.1 | .                  | .      |
|              | Gorai.009G414500.1 | Gorai.007G373100.1 | Vv06g1630          | .      |
| .            | .                  | .                  | Gorai.006G162700.1 | .      |
| Vv08g1443    | .                  | .                  | .                  | .      |
| .            | .                  | .                  | .                  | .      |
| Vv08g1444    | Tc05_g007090       | .                  | Gorai.002G246500.1 | .      |
| .            | .                  | .                  | .                  | .      |
| Vv08g1445    | .                  | Gorai.002G246600.1 | .                  | .      |
| .            | .                  | .                  | .                  | .      |
| Vv08g1446    | Tc05_g007080       | .                  | .                  | .      |
| .            | .                  | .                  | .                  | .      |
| Vv08g1447    | .                  | .                  | .                  | .      |
| .            | .                  | .                  | .                  | .      |
| Vv08g1448    | .                  | .                  | .                  | .      |
| .            | .                  | .                  | .                  | .      |
| Vv08g1449    | .                  | Gorai.006G162900.1 | .                  | .      |
| .            | Vv06g1624          | .                  | Gorai.013G269100.1 | .      |
| .            | Gorai.006G162900.1 | .                  | Vv13g0762          | .      |
| Tc10_g007060 | .                  | .                  | Gorai.012G007500.1 | .      |
| Vv08g1450    | .                  | .                  | .                  | .      |
| Vv13g0781    | .                  | .                  | .                  | .      |

|              |              |   |   |   |        |
|--------------|--------------|---|---|---|--------|
| Vv08g1451    | Tc05_g007070 | . | . | . | .      |
| .            | .            | . | . | . | .      |
| Vv08g1452    | .            | . | . | . | .      |
| .            | .            | . | . | . | .      |
| Vv08g1453    | .            | . | . | . | .      |
| .            | .            | . | . | . | .      |
| Vv08g1454    | .            | . | . | . | .      |
| .            | .            | . | . | . | .      |
| Vv08g1455    | .            | . | . | . | .      |
| .            | .            | . | . | . | .      |
| Vv08g1456    | .            | . | . | . | .      |
| .            | .            | . | . | . | .      |
| Vv08g1457    | .            | . | . | . | .      |
| .            | .            | . | . | . | .      |
| Vv08g1458    | .            | . | . | . | .      |
| .            | .            | . | . | . | .      |
| Vv08g1459    | .            | . | . | . | .      |
| .            | .            | . | . | . | .      |
| Vv08g1460    | .            | . | . | . | .      |
| .            | .            | . | . | . | .      |
| Vv08g1461    | .            | . | . | . | .      |
| .            | .            | . | . | . | .      |
| Vv08g1462    | .            | . | . | . | .      |
| .            | .            | . | . | . | .      |
| Vv08g1463    | .            | . | . | . | .      |
| .            | .            | . | . | . | .      |
| Vv08g1464    | Tc05_g018200 | . | . | . | .      |
| .            | .            | . | . | . | .      |
| Vv08g1465    | .            | . | . | . | Gorai. |
| 007G352600.1 | .            | . | . | . | .      |
| .            | .            | . | . | . | .      |
| Vv08g1466    | .            | . | . | . | .      |
| .            | .            | . | . | . | .      |
| Vv08g1467    | .            | . | . | . | .      |

|                    |              |   |                    |   |                    |        |   |
|--------------------|--------------|---|--------------------|---|--------------------|--------|---|
| .                  | .            | . | .                  | . | .                  | .      | . |
| .                  | .            | . | .                  | . | .                  | .      | . |
| Vv08g1468          | .            | . | .                  | . | .                  | .      | . |
| .                  | .            | . | .                  | . | .                  | .      | . |
| Vv08g1469          | Tc05_g014680 | . | .                  | . | .                  | .      | . |
| Vv13g0710          | Tc10_g006080 | . | .                  | . | Gorai.011G238000.1 | .      | . |
| Gorai.009G311500.1 | .            | . | .                  | . | .                  | .      | . |
| .                  | .            | . | .                  | . | .                  | .      | . |
| Vv08g1470          | .            | . | .                  | . | .                  | .      | . |
| .                  | .            | . | .                  | . | .                  | .      | . |
| Vv08g1471          | .            | . | Gorai.002G245600.1 | . | .                  | .      | . |
| .                  | .            | . | .                  | . | .                  | .      | . |
| Vv08g1472          | .            | . | .                  | . | .                  | .      | . |
| .                  | .            | . | .                  | . | .                  | .      | . |
| Vv08g1473          | .            | . | .                  | . | .                  | .      | . |
| .                  | .            | . | .                  | . | .                  | .      | . |
| Vv08g1474          | .            | . | .                  | . | .                  | .      | . |
| .                  | .            | . | .                  | . | .                  | .      | . |
| Vv08g1475          | .            | . | .                  | . | .                  | .      | . |
| .                  | .            | . | .                  | . | .                  | .      | . |
| Vv08g1476          | .            | . | .                  | . | .                  | Gorai. | . |
| 007G353000.1       | .            | . | .                  | . | .                  | .      | . |
| .                  | .            | . | .                  | . | .                  | .      | . |
| Vv08g1477          | .            | . | .                  | . | .                  | .      | . |
| .                  | .            | . | .                  | . | .                  | .      | . |
| Vv08g1478          | .            | . | .                  | . | .                  | .      | . |
| .                  | .            | . | .                  | . | .                  | .      | . |
| Vv08g1479          | .            | . | .                  | . | .                  | .      | . |
| .                  | .            | . | .                  | . | .                  | .      | . |
| Vv08g1480          | Tc05_g015090 | . | .                  | . | .                  | .      | . |
| .                  | .            | . | .                  | . | .                  | .      | . |
| Vv08g1481          | Tc05_g015110 | . | .                  | . | .                  | .      | . |
| Gorai.007G353100.1 | .            | . | .                  | . | .                  | .      | . |
| .                  | .            | . | .                  | . | .                  | .      | . |
| Vv08g1482          | Tc05_g015130 | . | .                  | . | .                  | .      | . |
| Gorai.007G353200.1 | .            | . | .                  | . | .                  | .      | . |
| .                  | .            | . | .                  | . | .                  | .      | . |
| Vv08g1483          | Tc05_g015200 | . | .                  | . | .                  | .      | . |
| .                  | .            | . | .                  | . | .                  | .      | . |

|                    |              |   |                    |                    |   |   |
|--------------------|--------------|---|--------------------|--------------------|---|---|
| Vv08g1484          | Tc05_g015240 | . | .                  | .                  | . | . |
| Vv13g0797          | .            | . | .                  | .                  | . | . |
| Vv08g1485          | Tc05_g015300 | . | .                  | .                  | . | . |
| .                  | .            | . | .                  | .                  | . | . |
| Vv08g1486          | Tc05_g015330 | . | .                  | .                  | . | . |
| Gorai.007G353400.1 | .            | . | .                  | .                  | . | . |
| Vv08g1487          | Tc05_g015340 | . | .                  | .                  | . | . |
| Gorai.007G353500.1 | .            | . | .                  | .                  | . | . |
| Vv08g1488          | Tc05_g015350 | . | .                  | .                  | . | . |
| .                  | .            | . | .                  | .                  | . | . |
| Vv08g1489          | Tc05_g015360 | . | .                  | Gorai.002G243800.1 | . | . |
| .                  | Vv13g0812    | . | .                  | .                  | . | . |
| .                  | .            | . | .                  | .                  | . | . |
| Vv08g1490          | .            | . | .                  | .                  | . | . |
| .                  | .            | . | .                  | .                  | . | . |
| Vv08g1491          | Tc05_g018080 | . | .                  | .                  | . | . |
| .                  | .            | . | .                  | .                  | . | . |
| Vv08g1492          | .            | . | .                  | .                  | . | . |
| .                  | .            | . | .                  | .                  | . | . |
| Vv08g1493          | .            | . | .                  | .                  | . | . |
| .                  | .            | . | .                  | .                  | . | . |
| Vv08g1494          | .            | . | .                  | .                  | . | . |
| .                  | .            | . | .                  | .                  | . | . |
| Vv08g1495          | .            | . | Gorai.002G243700.1 | .                  | . | . |
| .                  | Vv13g0815    | . | .                  | Gorai.011G233000.1 | . | . |
| .                  | .            | . | .                  | .                  | . | . |
| Vv08g1496          | Tc05_g015400 | . | .                  | .                  | . | . |
| Gorai.007G353800.1 | .            | . | .                  | .                  | . | . |
| Vv08g1497          | .            | . | .                  | .                  | . | . |
| .                  | .            | . | .                  | .                  | . | . |
| Vv08g1498          | .            | . | .                  | .                  | . | . |
| .                  | .            | . | .                  | .                  | . | . |
| Vv08g1499          | .            | . | .                  | .                  | . | . |
| .                  | .            | . | .                  | .                  | . | . |

|                           |              |  |                    |  |        |  |
|---------------------------|--------------|--|--------------------|--|--------|--|
| Vv08g1500                 |              |  |                    |  |        |  |
| Vv08g1501                 |              |  |                    |  |        |  |
| Vv08g1502                 | Tc05_g015530 |  |                    |  |        |  |
| Vv08g1503                 | Tc05_g015540 |  |                    |  |        |  |
| Vv08g1504                 |              |  |                    |  |        |  |
| Vv08g1505                 |              |  |                    |  |        |  |
| Vv08g1506                 |              |  |                    |  |        |  |
| Vv08g1507                 |              |  |                    |  |        |  |
| Vv08g1508                 |              |  |                    |  |        |  |
| Vv08g1509<br>007G354000.1 |              |  |                    |  | Gorai. |  |
| Vv08g1510                 |              |  |                    |  |        |  |
| Vv08g1511<br>007G354100.1 |              |  |                    |  | Gorai. |  |
| Vv08g1512                 |              |  |                    |  |        |  |
| Vv08g1513                 |              |  |                    |  |        |  |
| Vv08g1514                 |              |  | Gorai.002G240700.1 |  |        |  |
| Vv08g1515                 | Tc05_g020040 |  |                    |  |        |  |
| Vv08g1516                 |              |  |                    |  |        |  |



|           |              |  |  |  |  |  |
|-----------|--------------|--|--|--|--|--|
| Vv08g1517 | Tc05_g017800 |  |  |  |  |  |
| Vv08g1518 |              |  |  |  |  |  |
| Vv08g1519 | Tc05_g017760 |  |  |  |  |  |
| Vv08g1520 |              |  |  |  |  |  |
| Vv08g1521 | Tc05_g017590 |  |  |  |  |  |
| Vv08g1522 | Tc05_g017570 |  |  |  |  |  |
| Vv08g1523 |              |  |  |  |  |  |
| Vv08g1524 |              |  |  |  |  |  |
| Vv08g1525 |              |  |  |  |  |  |
| Vv08g1526 |              |  |  |  |  |  |
| Vv08g1527 |              |  |  |  |  |  |
| Vv08g1528 |              |  |  |  |  |  |
| Vv08g1529 |              |  |  |  |  |  |
| Vv08g1530 |              |  |  |  |  |  |
| Vv08g1531 |              |  |  |  |  |  |
| Vv08g1532 |              |  |  |  |  |  |

|           |              |   |   |   |   |   |   |
|-----------|--------------|---|---|---|---|---|---|
| Vv08g1533 | .            | . | . | . | . | . | . |
| .         | .            | . | . | . | . | . | . |
| Vv08g1534 | Tc05_g020020 | . | . | . | . | . | . |
| .         | .            | . | . | . | . | . | . |
| Vv08g1535 | .            | . | . | . | . | . | . |
| .         | .            | . | . | . | . | . | . |
| Vv08g1536 | Tc05_g016110 | . | . | . | . | . | . |
| .         | .            | . | . | . | . | . | . |
| Vv08g1537 | Tc05_g016120 | . | . | . | . | . | . |
| .         | .            | . | . | . | . | . | . |
| Vv08g1538 | .            | . | . | . | . | . | . |
| .         | .            | . | . | . | . | . | . |
| Vv08g1539 | .            | . | . | . | . | . | . |
| .         | .            | . | . | . | . | . | . |
| Vv08g1540 | .            | . | . | . | . | . | . |
| .         | .            | . | . | . | . | . | . |
| Vv08g1541 | .            | . | . | . | . | . | . |
| .         | .            | . | . | . | . | . | . |
| Vv08g1542 | .            | . | . | . | . | . | . |
| .         | .            | . | . | . | . | . | . |
| Vv08g1543 | .            | . | . | . | . | . | . |
| .         | .            | . | . | . | . | . | . |
| Vv08g1544 | .            | . | . | . | . | . | . |
| .         | .            | . | . | . | . | . | . |
| Vv08g1545 | .            | . | . | . | . | . | . |
| .         | .            | . | . | . | . | . | . |
| Vv08g1546 | .            | . | . | . | . | . | . |
| .         | .            | . | . | . | . | . | . |
| Vv08g1547 | .            | . | . | . | . | . | . |
| .         | .            | . | . | . | . | . | . |
| Vv08g1548 | .            | . | . | . | . | . | . |
| .         | .            | . | . | . | . | . | . |
| Vv08g1549 | .            | . | . | . | . | . | . |
| .         | .            | . | . | . | . | . | . |

|                    |   |   |   |   |                    |   |   |
|--------------------|---|---|---|---|--------------------|---|---|
| Vv08g1550          | . | . | . | . | .                  | . | . |
| .                  | . | . | . | . | .                  | . | . |
| Vv08g1551          | . | . | . | . | .                  | . | . |
| .                  | . | . | . | . | .                  | . | . |
| Vv08g1552          | . | . | . | . | Gorai.002G156900.1 | . | . |
| Gorai.007G361900.1 | . | . | . | . | .                  | . | . |
| .                  | . | . | . | . | .                  | . | . |
| Vv08g1553          | . | . | . | . | .                  | . | . |
| .                  | . | . | . | . | .                  | . | . |
| Vv08g1554          | . | . | . | . | .                  | . | . |
| .                  | . | . | . | . | .                  | . | . |
| Vv08g1555          | . | . | . | . | .                  | . | . |
| .                  | . | . | . | . | .                  | . | . |
| Vv08g1556          | . | . | . | . | Gorai.002G156800.1 | . | . |
| .                  | . | . | . | . | .                  | . | . |
| Vv08g1557          | . | . | . | . | .                  | . | . |
| .                  | . | . | . | . | .                  | . | . |
| Vv08g1558          | . | . | . | . | .                  | . | . |
| .                  | . | . | . | . | .                  | . | . |
| Vv08g1559          | . | . | . | . | .                  | . | . |
| .                  | . | . | . | . | .                  | . | . |
| Vv08g1560          | . | . | . | . | .                  | . | . |
| .                  | . | . | . | . | .                  | . | . |
| Vv08g1561          | . | . | . | . | .                  | . | . |
| .                  | . | . | . | . | .                  | . | . |
| Vv08g1562          | . | . | . | . | .                  | . | . |
| .                  | . | . | . | . | .                  | . | . |
| Vv08g1563          | . | . | . | . | Gorai.002G156700.1 | . | . |
| Gorai.007G362000.1 | . | . | . | . | .                  | . | . |
| .                  | . | . | . | . | .                  | . | . |
| Vv08g1564          | . | . | . | . | .                  | . | . |
| .                  | . | . | . | . | .                  | . | . |
| Vv08g1565          | . | . | . | . | .                  | . | . |
| .                  | . | . | . | . | .                  | . | . |

|                    |                    |                    |   |   |        |   |   |
|--------------------|--------------------|--------------------|---|---|--------|---|---|
| Vv08g1566          | .                  | .                  | . | . | .      | . | . |
| .                  | .                  | .                  | . | . | .      | . | . |
| Vv08g1567          | .                  | .                  | . | . | .      | . | . |
| .                  | .                  | .                  | . | . | .      | . | . |
| Vv08g1568          | Tc05_g018920       | .                  | . | . | .      | . | . |
| .                  | .                  | .                  | . | . | .      | . | . |
| Vv08g1569          | .                  | .                  | . | . | .      | . | . |
| .                  | .                  | .                  | . | . | .      | . | . |
| Vv08g1570          | Tc05_g018910       | .                  | . | . | .      | . | . |
| Vv06g0168          | .                  | Gorai.013G249400.1 | . | . | .      | . | . |
| Gorai.004G018500.1 | Gorai.009G070600.1 | .                  | . | . | .      | . | . |
| .                  | .                  | .                  | . | . | .      | . | . |
| Vv08g1571          | Tc05_g018880       | .                  | . | . | .      | . | . |
| .                  | .                  | .                  | . | . | .      | . | . |
| Vv08g1572          | .                  | .                  | . | . | .      | . | . |
| .                  | .                  | .                  | . | . | .      | . | . |
| Vv08g1573          | Tc05_g019950       | .                  | . | . | .      | . | . |
| .                  | .                  | .                  | . | . | .      | . | . |
| Vv08g1574          | .                  | .                  | . | . | .      | . | . |
| .                  | .                  | .                  | . | . | .      | . | . |
| Vv08g1575          | Tc05_g018870       | .                  | . | . | .      | . | . |
| Vv06g0165          | .                  | .                  | . | . | Gorai. | . | . |
| 009G070400.1       | .                  | .                  | . | . | .      | . | . |
| .                  | .                  | .                  | . | . | .      | . | . |
| Vv08g1576          | Tc05_g018860       | .                  | . | . | .      | . | . |
| Vv06g0164          | Tc09_g031150       | Gorai.013G249200.1 | . | . | .      | . | . |
| Gorai.004G018400.1 | .                  | .                  | . | . | .      | . | . |
| .                  | .                  | .                  | . | . | .      | . | . |
| Vv08g1577          | Tc05_g018850       | .                  | . | . | .      | . | . |
| Vv06g0162          | .                  | .                  | . | . | Gorai. | . | . |
| 009G070300.1       | .                  | .                  | . | . | .      | . | . |
| .                  | .                  | .                  | . | . | .      | . | . |
| Vv08g1578          | Tc05_g019670       | .                  | . | . | .      | . | . |
| .                  | .                  | .                  | . | . | .      | . | . |
| Vv08g1579          | Tc05_g018840       | .                  | . | . | .      | . | . |
| .                  | .                  | .                  | . | . | .      | . | . |
| Vv08g1580          | .                  | .                  | . | . | .      | . | . |
| .                  | .                  | .                  | . | . | .      | . | . |
| .                  | .                  | .                  | . | . | .      | . | . |

|           |                    |                    |   |                    |   |   |   |
|-----------|--------------------|--------------------|---|--------------------|---|---|---|
| Vv08g1581 | .                  | .                  | . | .                  | . | . | . |
| .         | .                  | .                  | . | .                  | . | . | . |
| Vv08g1582 | Tc05_g018800       | .                  | . | Gorai.002G156600.1 | . | . | . |
| .         | Gorai.007G362300.1 | Gorai.007G362300.1 | . | Vv06g0157          | . | . | . |
| .         | Gorai.013G248700.1 | .                  | . | .                  | . | . | . |
| Vv08g1583 | Tc05_g021050       | .                  | . | .                  | . | . | . |
| .         | .                  | .                  | . | .                  | . | . | . |
| Vv08g1584 | Tc05_g018790       | .                  | . | .                  | . | . | . |
| .         | .                  | .                  | . | .                  | . | . | . |
| Vv08g1585 | Tc05_g018780       | .                  | . | .                  | . | . | . |
| .         | Vv06g0154          | .                  | . | .                  | . | . | . |
| .         | .                  | .                  | . | .                  | . | . | . |
| Vv08g1586 | Tc05_g018770       | .                  | . | .                  | . | . | . |
| .         | .                  | .                  | . | .                  | . | . | . |
| Vv08g1587 | Tc05_g018750       | .                  | . | .                  | . | . | . |
| .         | .                  | .                  | . | .                  | . | . | . |
| Vv08g1588 | Tc05_g018740       | .                  | . | Gorai.002G156400.1 | . | . | . |
| .         | .                  | .                  | . | .                  | . | . | . |
| Vv08g1589 | Tc05_g018730       | .                  | . | .                  | . | . | . |
| .         | .                  | .                  | . | .                  | . | . | . |
| Vv08g1590 | Tc05_g018720       | .                  | . | .                  | . | . | . |
| .         | .                  | .                  | . | .                  | . | . | . |
| Vv08g1591 | Tc05_g018680       | .                  | . | .                  | . | . | . |
| .         | .                  | .                  | . | .                  | . | . | . |
| Vv08g1592 | Tc05_g018670       | .                  | . | .                  | . | . | . |
| .         | .                  | .                  | . | .                  | . | . | . |
| Vv08g1593 | .                  | .                  | . | .                  | . | . | . |
| .         | .                  | .                  | . | .                  | . | . | . |
| Vv08g1594 | Tc05_g018650       | .                  | . | .                  | . | . | . |
| .         | .                  | .                  | . | .                  | . | . | . |
| Vv08g1595 | .                  | .                  | . | .                  | . | . | . |
| .         | .                  | .                  | . | .                  | . | . | . |
| Vv08g1596 | .                  | .                  | . | .                  | . | . | . |
| .         | .                  | .                  | . | .                  | . | . | . |
| Vv08g1597 | .                  | .                  | . | .                  | . | . | . |

|           |                    |                    |                    |
|-----------|--------------------|--------------------|--------------------|
| Vv08g1598 |                    |                    | Gorai.002G156300.1 |
| Vv08g1599 |                    |                    |                    |
| Vv08g1600 |                    |                    | Gorai.002G155900.1 |
|           | Gorai.007G362400.1 |                    |                    |
| Vv08g1601 |                    |                    | Gorai.002G155800.1 |
| Vv08g1602 |                    |                    |                    |
| Vv08g1603 |                    |                    |                    |
| Vv08g1604 |                    |                    |                    |
| Vv08g1605 |                    |                    |                    |
| Vv08g1606 |                    |                    |                    |
| Vv08g1607 | Tc05_g019640       |                    |                    |
| Vv08g1608 |                    |                    | Gorai.002G155600.1 |
|           | Vv06g0144          |                    |                    |
| Vv08g1609 |                    |                    |                    |
| Vv08g1610 |                    |                    |                    |
| Vv06g0142 |                    | Gorai.013G248400.1 |                    |
| Vv08g1611 |                    |                    |                    |
| Vv08g1612 |                    |                    | Gorai.002G155500.1 |
| Vv08g1613 |                    |                    | Gorai.002G155400.1 |

|                    |              |   |   |                    |   |        |   |
|--------------------|--------------|---|---|--------------------|---|--------|---|
| Vv08g1614          | .            | . | . | .                  | . | .      | . |
| .                  | .            | . | . | .                  | . | .      | . |
| Vv08g1615          | .            | . | . | .                  | . | .      | . |
| Vv06g0139          | .            | . | . | .                  | . | .      | . |
| .                  | .            | . | . | .                  | . | .      | . |
| Vv08g1616          | .            | . | . | .                  | . | .      | . |
| .                  | .            | . | . | .                  | . | .      | . |
| Vv08g1617          | .            | . | . | Gorai.002G155200.1 | . | .      | . |
| .                  | .            | . | . | .                  | . | .      | . |
| Vv08g1618          | .            | . | . | .                  | . | .      | . |
| .                  | .            | . | . | .                  | . | .      | . |
| Vv08g1619          | .            | . | . | .                  | . | .      | . |
| .                  | .            | . | . | .                  | . | .      | . |
| Vv08g1620          | .            | . | . | Gorai.002G155100.1 | . | .      | . |
| .                  | .            | . | . | .                  | . | .      | . |
| Vv08g1621          | .            | . | . | .                  | . | .      | . |
| .                  | .            | . | . | .                  | . | .      | . |
| Vv08g1622          | .            | . | . | .                  | . | .      | . |
| .                  | .            | . | . | .                  | . | .      | . |
| Vv08g1623          | Tc05_g020680 | . | . | .                  | . | .      | . |
| Gorai.007G362500.1 | Vv06g0133    | . | . | .                  | . | .      | . |
| .                  | .            | . | . | .                  | . | .      | . |
| Vv08g1624          | Tc05_g020670 | . | . | .                  | . | .      | . |
| Vv06g0132          | .            | . | . | .                  | . | .      | . |
| .                  | .            | . | . | .                  | . | .      | . |
| Vv08g1625          | .            | . | . | .                  | . | Gorai. | . |
| 007G362600.1       | Vv06g0129    | . | . | .                  | . | .      | . |
| .                  | .            | . | . | .                  | . | .      | . |
| Vv08g1626          | .            | . | . | .                  | . | .      | . |
| .                  | .            | . | . | .                  | . | .      | . |
| Vv08g1627          | .            | . | . | .                  | . | .      | . |
| Vv06g0128          | .            | . | . | .                  | . | .      | . |
| .                  | .            | . | . | .                  | . | .      | . |
| Vv08g1628          | .            | . | . | .                  | . | .      | . |
| .                  | .            | . | . | .                  | . | .      | . |
| Vv08g1629          | .            | . | . | .                  | . | .      | . |
| Vv06g0127          | .            | . | . | .                  | . | .      | . |
| .                  | .            | . | . | .                  | . | .      | . |

|                    |              |   |                    |                    |   |   |   |
|--------------------|--------------|---|--------------------|--------------------|---|---|---|
| Vv08g1630          | .            | . | .                  | .                  | . | . | . |
| .                  | .            | . | .                  | .                  | . | . | . |
| .                  | .            | . | .                  | .                  | . | . | . |
| Vv08g1631          | Tc05_g020650 | . | .                  | .                  | . | . | . |
| Vv06g0126          | .            | . | Gorai.013G248100.1 | .                  | . | . | . |
| Gorai.004G017700.1 | .            | . | .                  | .                  | . | . | . |
| .                  | .            | . | .                  | .                  | . | . | . |
| Vv08g1632          | .            | . | .                  | .                  | . | . | . |
| Vv06g0125          | .            | . | .                  | .                  | . | . | . |
| .                  | .            | . | .                  | .                  | . | . | . |
| Vv08g1633          | Tc05_g020630 | . | .                  | Gorai.002G231800.1 | . | . | . |
| .                  | .            | . | .                  | .                  | . | . | . |
| .                  | .            | . | .                  | .                  | . | . | . |
| Vv08g1634          | Tc05_g020590 | . | .                  | Gorai.002G231900.1 | . | . | . |
| .                  | .            | . | .                  | .                  | . | . | . |
| .                  | .            | . | .                  | .                  | . | . | . |
| Vv08g1635          | Tc05_g020560 | . | .                  | .                  | . | . | . |
| .                  | .            | . | .                  | .                  | . | . | . |
| .                  | .            | . | .                  | .                  | . | . | . |
| Vv08g1636          | .            | . | .                  | .                  | . | . | . |
| Vv06g0117          | .            | . | .                  | .                  | . | . | . |
| .                  | .            | . | .                  | .                  | . | . | . |
| Vv08g1637          | Tc05_g020540 | . | .                  | .                  | . | . | . |
| .                  | .            | . | .                  | .                  | . | . | . |
| .                  | .            | . | .                  | .                  | . | . | . |
| Vv08g1638          | Tc05_g020530 | . | .                  | .                  | . | . | . |
| .                  | .            | . | .                  | .                  | . | . | . |
| .                  | .            | . | .                  | .                  | . | . | . |
| Vv08g1639          | .            | . | .                  | .                  | . | . | . |
| .                  | .            | . | .                  | .                  | . | . | . |
| .                  | .            | . | .                  | .                  | . | . | . |
| Vv08g1640          | .            | . | .                  | .                  | . | . | . |
| .                  | .            | . | .                  | .                  | . | . | . |
| .                  | .            | . | .                  | .                  | . | . | . |
| Vv08g1641          | .            | . | .                  | .                  | . | . | . |
| .                  | .            | . | .                  | .                  | . | . | . |
| .                  | .            | . | .                  | .                  | . | . | . |
| Vv08g1642          | .            | . | .                  | .                  | . | . | . |
| .                  | .            | . | .                  | .                  | . | . | . |
| .                  | .            | . | .                  | .                  | . | . | . |
| Vv08g1643          | Tc05_g020510 | . | .                  | .                  | . | . | . |
| .                  | .            | . | .                  | .                  | . | . | . |
| .                  | .            | . | .                  | .                  | . | . | . |
| Vv08g1644          | .            | . | .                  | .                  | . | . | . |
| .                  | .            | . | .                  | .                  | . | . | . |
| .                  | .            | . | .                  | .                  | . | . | . |
| Vv08g1645          | Tc05_g020400 | . | .                  | .                  | . | . | . |
| .                  | .            | . | .                  | .                  | . | . | . |
| .                  | .            | . | .                  | .                  | . | . | . |
| Vv08g1646          | Tc05_g020360 | . | .                  | .                  | . | . | . |



|                    |                    |              |                    |                    |   |   |   |
|--------------------|--------------------|--------------|--------------------|--------------------|---|---|---|
| .                  | .                  | .            | .                  | .                  | . | . | . |
| .                  | .                  | .            | .                  | .                  | . | . | . |
| Vv08g1647          | Tc05_g020340       | .            | .                  | .                  | . | . | . |
| .                  | .                  | .            | .                  | .                  | . | . | . |
| .                  | .                  | .            | .                  | .                  | . | . | . |
| Vv08g1648          | Tc05_g020330       | .            | .                  | .                  | . | . | . |
|                    | Vv06g0112          | .            | Gorai.013G247700.1 | .                  | . | . | . |
|                    | Gorai.009G067500.1 | .            | .                  | .                  | . | . | . |
| .                  | .                  | .            | .                  | .                  | . | . | . |
| Vv08g1649          | Tc05_g020310       | .            | .                  | .                  | . | . | . |
| .                  | .                  | .            | .                  | .                  | . | . | . |
| .                  | .                  | .            | .                  | .                  | . | . | . |
| Vv08g1650          | Tc05_g020300       | .            | .                  | .                  | . | . | . |
|                    | Vv06g0078          | Tc09_g021690 | Gorai.013G244100.1 | .                  | . | . | . |
| .                  | .                  | .            | .                  | .                  | . | . | . |
| .                  | .                  | .            | .                  | .                  | . | . | . |
| Vv08g1651          | Tc05_g020290       | .            | .                  | .                  | . | . | . |
| .                  | .                  | .            | .                  | .                  | . | . | . |
| .                  | .                  | .            | .                  | .                  | . | . | . |
| Vv08g1652          | Tc05_g020280       | .            | .                  | .                  | . | . | . |
| Gorai.007G362800.1 | .                  | .            | .                  | .                  | . | . | . |
| .                  | .                  | .            | .                  | .                  | . | . | . |
| Vv08g1653          | Tc05_g020270       | .            | .                  | Gorai.002G154600.1 | . | . | . |
| .                  | .                  | .            | .                  | .                  | . | . | . |
| .                  | .                  | .            | .                  | .                  | . | . | . |
| Vv08g1654          | Tc05_g020250       | .            | .                  | .                  | . | . | . |
| .                  | .                  | .            | .                  | .                  | . | . | . |
| .                  | .                  | .            | .                  | .                  | . | . | . |
| Vv08g1655          | .                  | .            | .                  | .                  | . | . | . |
| .                  | .                  | .            | .                  | .                  | . | . | . |
| .                  | .                  | .            | .                  | .                  | . | . | . |
| Vv08g1656          | Tc05_g020240       | .            | Gorai.002G232500.1 | .                  | . | . | . |
| .                  | .                  | .            | .                  | .                  | . | . | . |
| .                  | .                  | .            | .                  | .                  | . | . | . |
| Vv08g1657          | Tc05_g020230       | .            | .                  | .                  | . | . | . |
| .                  | .                  | .            | .                  | .                  | . | . | . |
| .                  | .                  | .            | .                  | .                  | . | . | . |
| Vv08g1658          | .                  | .            | .                  | .                  | . | . | . |
| .                  | .                  | .            | .                  | .                  | . | . | . |
| .                  | .                  | .            | .                  | .                  | . | . | . |
| Vv08g1659          | Tc05_g020220       | .            | .                  | .                  | . | . | . |
| .                  | .                  | .            | .                  | .                  | . | . | . |
| .                  | .                  | .            | .                  | .                  | . | . | . |
| Vv08g1660          | .                  | .            | .                  | .                  | . | . | . |
| .                  | .                  | .            | .                  | .                  | . | . | . |
| .                  | .                  | .            | .                  | .                  | . | . | . |
| Vv08g1661          | .                  | .            | Gorai.002G232600.1 | Gorai.             | . | . | . |
| 002G154300.1       | .                  | .            | .                  | .                  | . | . | . |
| .                  | .                  | .            | .                  | .                  | . | . | . |
| .                  | .                  | .            | .                  | .                  | . | . | . |

|                    |              |                    |                    |        |
|--------------------|--------------|--------------------|--------------------|--------|
| Vv08g1662          | Tc05_g024140 | Gorai.013G114900.1 | .                  | .      |
| .                  | .            | .                  | .                  | .      |
| Vv08g1663          | Tc05_g024150 | .                  | .                  | .      |
| Vv06g0070          | Tc09_g020260 | Gorai.013G244400.1 | .                  | .      |
| .                  | .            | .                  | .                  | .      |
| Vv08g1664          | Tc05_g024160 | Gorai.013G115000.1 | .                  | .      |
| .                  | .            | .                  | .                  | .      |
| Vv08g1665          | .            | Gorai.002G151800.1 | .                  | .      |
| .                  | Vv06g0068    | Tc09_g020300       | Gorai.013G244600.1 | .      |
| .                  | .            | Gorai.003G126300.1 | .                  | .      |
| Vv08g1666          | Tc05_g024170 | Gorai.013G115100.1 | .                  | .      |
| Gorai.007G346000.1 | .            | .                  | .                  | .      |
| .                  | .            | .                  | .                  | .      |
| Vv08g1667          | .            | .                  | .                  | .      |
| .                  | .            | .                  | .                  | .      |
| Vv08g1668          | Tc05_g024180 | .                  | .                  | .      |
| .                  | .            | .                  | .                  | .      |
| Vv08g1669          | Tc05_g024230 | Gorai.013G115200.1 | .                  | .      |
| .                  | .            | .                  | .                  | .      |
| Vv08g1670          | Tc05_g024240 | .                  | .                  | Gorai. |
| 007G345900.1       | .            | .                  | .                  | .      |
| .                  | .            | .                  | .                  | .      |
| Vv08g1671          | Tc05_g024250 | .                  | .                  | Gorai. |
| 007G345800.1       | .            | .                  | .                  | .      |
| .                  | .            | .                  | .                  | .      |
| Vv08g1672          | Tc05_g024270 | Gorai.013G115700.1 | .                  | .      |
| .                  | Vv06g0056    | Tc09_g004560       | .                  | .      |
| Gorai.001G023800.1 | .            | Gorai.009G047000.1 | Gorai.             | .      |
| 003G150800.1       | .            | .                  | .                  | .      |
| Vv08g1673          | Tc05_g024280 | .                  | .                  | .      |
| .                  | .            | .                  | .                  | .      |
| .                  | .            | .                  | .                  | .      |
| Vv08g1674          | .            | .                  | .                  | Gorai. |
| 007G343200.1       | .            | .                  | .                  | .      |
| .                  | .            | .                  | .                  | .      |
| Vv08g1675          | Tc05_g024330 | .                  | .                  | .      |
| .                  | .            | .                  | .                  | .      |
| .                  | .            | .                  | .                  | .      |
| Vv08g1676          | .            | .                  | .                  | .      |
| .                  | .            | .                  | .                  | .      |
| .                  | .            | .                  | .                  | .      |
| Vv08g1677          | .            | .                  | .                  | .      |

|              |              |   |   |   |   |        |   |
|--------------|--------------|---|---|---|---|--------|---|
| .            | .            | . | . | . | . | .      | . |
| .            | .            | . | . | . | . | .      | . |
| Vv08g1678    | .            | . | . | . | . | Gorai. | . |
| 007G343400.1 | .            | . | . | . | . | .      | . |
| .            | .            | . | . | . | . | .      | . |
| Vv08g1679    | .            | . | . | . | . | Gorai. | . |
| 007G343500.1 | .            | . | . | . | . | .      | . |
| .            | .            | . | . | . | . | .      | . |
| Vv08g1680    | .            | . | . | . | . | .      | . |
| .            | .            | . | . | . | . | .      | . |
| .            | .            | . | . | . | . | .      | . |
| Vv08g1681    | .            | . | . | . | . | .      | . |
| Vv06g0037    | .            | . | . | . | . | Gorai. | . |
| 003G129200.1 | .            | . | . | . | . | .      | . |
| Vv08g1682    | .            | . | . | . | . | .      | . |
| .            | .            | . | . | . | . | .      | . |
| .            | .            | . | . | . | . | .      | . |
| Vv08g1683    | .            | . | . | . | . | Gorai. | . |
| 007G343600.1 | Vv06g0036    | . | . | . | . | .      | . |
| .            | .            | . | . | . | . | .      | . |
| Vv08g1684    | .            | . | . | . | . | .      | . |
| .            | .            | . | . | . | . | .      | . |
| .            | .            | . | . | . | . | .      | . |
| Vv08g1685    | .            | . | . | . | . | .      | . |
| .            | .            | . | . | . | . | .      | . |
| .            | .            | . | . | . | . | .      | . |
| Vv08g1686    | .            | . | . | . | . | .      | . |
| .            | .            | . | . | . | . | .      | . |
| .            | .            | . | . | . | . | .      | . |
| Vv08g1687    | .            | . | . | . | . | .      | . |
| .            | .            | . | . | . | . | .      | . |
| .            | .            | . | . | . | . | .      | . |
| Vv08g1688    | Tc05_g000360 | . | . | . | . | .      | . |
| .            | .            | . | . | . | . | .      | . |
| .            | .            | . | . | . | . | .      | . |
| Vv08g1689    | Tc05_g010580 | . | . | . | . | .      | . |
| .            | .            | . | . | . | . | .      | . |
| .            | .            | . | . | . | . | .      | . |
| Vv08g1690    | .            | . | . | . | . | .      | . |
| .            | .            | . | . | . | . | .      | . |
| .            | .            | . | . | . | . | .      | . |
| Vv08g1691    | Tc05_g010650 | . | . | . | . | .      | . |
| .            | .            | . | . | . | . | .      | . |
| .            | .            | . | . | . | . | .      | . |
| Vv08g1692    | .            | . | . | . | . | .      | . |
| .            | .            | . | . | . | . | .      | . |
| .            | .            | . | . | . | . | .      | . |
| Vv08g1693    | .            | . | . | . | . | .      | . |
| .            | .            | . | . | . | . | .      | . |
| .            | .            | . | . | . | . | .      | . |

|           |              |                    |              |   |   |   |   |
|-----------|--------------|--------------------|--------------|---|---|---|---|
| Vv08g1694 | .            | .                  | .            | . | . | . | . |
| .         | .            | .                  | .            | . | . | . | . |
| Vv08g1695 | .            | .                  | .            | . | . | . | . |
| .         | .            | .                  | .            | . | . | . | . |
| Vv08g1696 | .            | .                  | .            | . | . | . | . |
| .         | .            | .                  | .            | . | . | . | . |
| Vv08g1697 | Tc05_g024650 | .                  | .            | . | . | . | . |
| .         | .            | .                  | .            | . | . | . | . |
| Vv08g1698 | Tc05_g024670 | Gorai.013G117600.1 | .            | . | . | . | . |
| .         | .            | Vv06g0023          | Tc09_g018470 | . | . | . | . |
| .         | .            | Gorai.003G154200.1 | .            | . | . | . | . |
| .         | .            | .                  | .            | . | . | . | . |
| Vv08g1699 | Tc05_g024970 | .                  | .            | . | . | . | . |
| .         | .            | .                  | .            | . | . | . | . |
| Vv08g1700 | Tc05_g024980 | Gorai.013G117900.1 | .            | . | . | . | . |
| .         | .            | .                  | .            | . | . | . | . |
| Vv08g1701 | Tc05_g024990 | .                  | .            | . | . | . | . |
| .         | .            | .                  | .            | . | . | . | . |
| Vv08g1702 | Tc05_g025020 | Gorai.013G118000.1 | .            | . | . | . | . |
| .         | .            | .                  | .            | . | . | . | . |
| Vv08g1703 | .            | .                  | .            | . | . | . | . |
| .         | .            | .                  | .            | . | . | . | . |
| Vv08g1704 | Tc05_g025030 | Gorai.013G118100.1 | .            | . | . | . | . |
| .         | .            | .                  | .            | . | . | . | . |
| Vv08g1705 | .            | .                  | .            | . | . | . | . |
| .         | .            | .                  | .            | . | . | . | . |
| Vv08g1706 | Tc05_g025040 | .                  | .            | . | . | . | . |
| .         | .            | .                  | .            | . | . | . | . |
| Vv08g1707 | .            | .                  | .            | . | . | . | . |
| .         | .            | .                  | .            | . | . | . | . |
| Vv08g1708 | Tc05_g025070 | .                  | .            | . | . | . | . |
| .         | .            | .                  | .            | . | . | . | . |
| Vv08g1709 | .            | .                  | .            | . | . | . | . |
| .         | .            | .                  | .            | . | . | . | . |
| Vv08g1710 | .            | .                  | .            | . | . | . | . |

|             |              |   |                    |   |   |   |
|-------------|--------------|---|--------------------|---|---|---|
| .           | .            | . | .                  | . | . | . |
| .           | .            | . | .                  | . | . | . |
| Vv08g1711   | .            | . | Gorai.002G228500.1 | . | . | . |
| .           | .            | . | .                  | . | . | . |
| Vv08g1712   | .            | . | .                  | . | . | . |
| .           | .            | . | .                  | . | . | . |
| Vv08g1713   | .            | . | .                  | . | . | . |
| .           | .            | . | .                  | . | . | . |
| Vv08g1714   | Tc05_g008040 | . | .                  | . | . | . |
| .           | .            | . | .                  | . | . | . |
| Vv08g1715   | Tc05_g008050 | . | .                  | . | . | . |
| .           | .            | . | .                  | . | . | . |
| Vv08g1716   | Tc05_g008140 | . | .                  | . | . | . |
| .           | .            | . | .                  | . | . | . |
| Vv08g1717   | Tc05_g000120 | . | .                  | . | . | . |
| Vv0Unrg9201 | .            | . | .                  | . | . | . |
| .           | .            | . | .                  | . | . | . |
| Vv08g1718   | .            | . | .                  | . | . | . |
| .           | .            | . | .                  | . | . | . |
| Vv08g1719   | Tc05_g000110 | . | .                  | . | . | . |
| .           | .            | . | .                  | . | . | . |
| Vv08g1720   | .            | . | .                  | . | . | . |
| .           | .            | . | .                  | . | . | . |
| Vv08g1721   | .            | . | .                  | . | . | . |
| Vv0Unrg9200 | .            | . | .                  | . | . | . |
| .           | .            | . | .                  | . | . | . |
| Vv08g1722   | Tc05_g000110 | . | .                  | . | . | . |
| Vv0Unrg9199 | .            | . | .                  | . | . | . |
| .           | .            | . | .                  | . | . | . |
| Vv08g1723   | .            | . | .                  | . | . | . |
| .           | .            | . | .                  | . | . | . |
| Vv08g1724   | .            | . | .                  | . | . | . |
| .           | .            | . | .                  | . | . | . |
| Vv08g1725   | .            | . | Gorai.002G228900.1 | . | . | . |
| .           | .            | . | .                  | . | . | . |
| Vv08g1726   | Tc05_g004050 | . | .                  | . | . | . |
| .           | .            | . | .                  | . | . | . |
| .           | .            | . | .                  | . | . | . |

|              |                    |           |                    |   |   |        |   |
|--------------|--------------------|-----------|--------------------|---|---|--------|---|
| Vv08g1727    | .                  | .         | .                  | . | . | .      | . |
| .            | .                  | .         | .                  | . | . | .      | . |
| Vv08g1728    | .                  | .         | .                  | . | . | .      | . |
| .            | .                  | .         | .                  | . | . | .      | . |
| Vv08g1729    | .                  | .         | .                  | . | . | .      | . |
| .            | .                  | .         | .                  | . | . | .      | . |
| Vv08g1730    | .                  | .         | .                  | . | . | .      | . |
| .            | .                  | .         | .                  | . | . | .      | . |
| Vv08g1731    | .                  | .         | Gorai.002G229100.1 | . | . | .      | . |
| .            | .                  | .         | .                  | . | . | .      | . |
| Vv08g1732    | Tc05_g000120       | .         | .                  | . | . | .      | . |
| Vv0Unrg9198  | .                  | .         | .                  | . | . | .      | . |
| .            | .                  | .         | .                  | . | . | .      | . |
| Vv08g1733    | .                  | .         | .                  | . | . | .      | . |
| .            | .                  | .         | .                  | . | . | .      | . |
| Vv08g1734    | .                  | .         | .                  | . | . | .      | . |
| .            | .                  | .         | .                  | . | . | .      | . |
| Vv08g1735    | .                  | .         | .                  | . | . | .      | . |
| .            | .                  | .         | .                  | . | . | .      | . |
| Vv08g1736    | .                  | .         | .                  | . | . | .      | . |
| .            | .                  | .         | .                  | . | . | .      | . |
| Vv08g1737    | .                  | .         | .                  | . | . | Gorai. | . |
| 007G357900.1 | .                  | .         | .                  | . | . | .      | . |
| .            | .                  | .         | .                  | . | . | .      | . |
| Vv08g1738    | Tc05_g025560       | .         | .                  | . | . | .      | . |
| .            | .                  | .         | .                  | . | . | .      | . |
| Vv08g1739    | .                  | .         | .                  | . | . | .      | . |
| .            | .                  | .         | .                  | . | . | .      | . |
| Vv08g1740    | .                  | .         | .                  | . | . | .      | . |
| .            | .                  | .         | .                  | . | . | .      | . |
| Vv08g1741    | Tc05_g008610       | .         | Gorai.002G229200.1 | . | . | .      | . |
| .            | Gorai.007G358100.1 | .         | .                  | . | . | .      | . |
| .            | .                  | Vv13g1290 | .                  | . | . | .      | . |
| .            | .                  | .         | .                  | . | . | .      | . |
| Vv08g1742    | .                  | .         | Gorai.002G229300.1 | . | . | .      | . |
| .            | .                  | .         | .                  | . | . | .      | . |
| .            | .                  | .         | .                  | . | . | .      | . |
| Vv08g1743    | Tc05_g003760       | .         | .                  | . | . | Gorai. | . |

|                    |              |   |                    |   |   |           |   |
|--------------------|--------------|---|--------------------|---|---|-----------|---|
| 012G108100.1       | .            | . | .                  | . | . | .         | . |
| .                  | .            | . | .                  | . | . | .         | . |
| Vv08g1744          | .            | . | .                  | . | . | .         | . |
| .                  | .            | . | .                  | . | . | .         | . |
| Vv08g1745          | .            | . | .                  | . | . | .         | . |
| .                  | .            | . | .                  | . | . | .         | . |
| Vv08g1746          | .            | . | Gorai.002G229800.1 | . | . | .         | . |
| .                  | .            | . | .                  | . | . | .         | . |
| Vv08g1747          | .            | . | .                  | . | . | .         | . |
| .                  | .            | . | .                  | . | . | .         | . |
| Vv08g1748          | .            | . | .                  | . | . | Vv13g1280 | . |
| .                  | .            | . | .                  | . | . | .         | . |
| Vv08g1749          | .            | . | Gorai.002G229900.1 | . | . | .         | . |
| .                  | .            | . | .                  | . | . | .         | . |
| Vv08g1750          | .            | . | .                  | . | . | .         | . |
| .                  | .            | . | .                  | . | . | .         | . |
| Vv08g1751          | .            | . | .                  | . | . | .         | . |
| .                  | .            | . | .                  | . | . | .         | . |
| Vv08g1752          | .            | . | Gorai.002G230000.1 | . | . | .         | . |
| .                  | .            | . | .                  | . | . | .         | . |
| Vv08g1753          | .            | . | .                  | . | . | .         | . |
| .                  | .            | . | .                  | . | . | .         | . |
| Vv08g1754          | .            | . | .                  | . | . | .         | . |
| .                  | .            | . | .                  | . | . | .         | . |
| Vv08g1755          | .            | . | .                  | . | . | .         | . |
| .                  | .            | . | .                  | . | . | .         | . |
| Vv08g1756          | .            | . | .                  | . | . | .         | . |
| .                  | .            | . | .                  | . | . | .         | . |
| Vv08g1757          | .            | . | .                  | . | . | .         | . |
| .                  | .            | . | .                  | . | . | .         | . |
| Vv08g1758          | Tc05_g025670 | . | .                  | . | . | .         | . |
| Gorai.007G359400.1 | .            | . | .                  | . | . | .         | . |
| .                  | .            | . | .                  | . | . | .         | . |
| Vv08g1759          | .            | . | .                  | . | . | .         | . |
| .                  | .            | . | .                  | . | . | .         | . |
| .                  | .            | . | .                  | . | . | .         | . |

|              |              |   |                    |   |        |
|--------------|--------------|---|--------------------|---|--------|
| Vv08g1760    | .            | . | Gorai.002G230200.1 | . | .      |
| .            | .            | . | .                  | . | .      |
| Vv08g1761    | .            | . | .                  | . | .      |
| .            | .            | . | .                  | . | .      |
| Vv08g1762    | Tc05_g008930 | . | .                  | . | .      |
| .            | .            | . | .                  | . | .      |
| Vv08g1763    | .            | . | Gorai.002G230300.1 | . | .      |
| .            | Vv0Unrg9174  | . | .                  | . | .      |
| .            | Vv13g1264    | . | .                  | . | .      |
| .            | .            | . | .                  | . | .      |
| Vv08g1764    | .            | . | .                  | . | .      |
| Vv13g1262    | .            | . | .                  | . | .      |
| .            | .            | . | .                  | . | .      |
| Vv08g1765    | .            | . | .                  | . | .      |
| .            | .            | . | .                  | . | .      |
| .            | .            | . | .                  | . | .      |
| Vv08g1766    | .            | . | .                  | . | .      |
| Vv13g1256    | .            | . | .                  | . | .      |
| .            | .            | . | .                  | . | .      |
| Vv08g1767    | .            | . | .                  | . | Gorai. |
| 007G359800.1 | .            | . | .                  | . | .      |
| .            | .            | . | .                  | . | .      |
| Vv08g1768    | Tc05_g000360 | . | .                  | . | .      |
| .            | .            | . | .                  | . | .      |
| .            | .            | . | .                  | . | .      |
| Vv08g1769    | .            | . | .                  | . | Gorai. |
| 007G359900.1 | .            | . | .                  | . | .      |
| .            | .            | . | .                  | . | .      |
| Vv08g1770    | .            | . | .                  | . | .      |
| .            | .            | . | .                  | . | .      |
| .            | .            | . | .                  | . | .      |
| Vv08g1771    | .            | . | .                  | . | .      |
| .            | .            | . | .                  | . | .      |
| .            | .            | . | .                  | . | .      |
| Vv08g1772    | .            | . | .                  | . | .      |
| .            | .            | . | .                  | . | .      |
| .            | .            | . | .                  | . | .      |
| Vv08g1773    | .            | . | .                  | . | .      |
| .            | .            | . | .                  | . | .      |
| .            | .            | . | .                  | . | .      |
| Vv08g1774    | .            | . | .                  | . | .      |
| Vv13g1239    | .            | . | .                  | . | .      |
| .            | .            | . | .                  | . | .      |
| Vv08g1775    | .            | . | .                  | . | .      |
| Vv13g1237    | .            | . | .                  | . | .      |
| .            | .            | . | .                  | . | .      |
| Vv08g1776    | .            | . | .                  | . | Gorai. |



|              |              |   |                    |   |   |   |
|--------------|--------------|---|--------------------|---|---|---|
| 007G360200.1 | Vv13g1227    | . | .                  | . | . | . |
| .            | .            | . | .                  | . | . | . |
| Vv08g1777    | .            | . | Gorai.002G230400.1 | . | . | . |
| .            | .            | . | .                  | . | . | . |
| Vv08g1778    | .            | . | .                  | . | . | . |
| .            | .            | . | .                  | . | . | . |
| Vv08g1779    | .            | . | .                  | . | . | . |
| .            | .            | . | .                  | . | . | . |
| Vv08g1780    | .            | . | .                  | . | . | . |
| .            | .            | . | .                  | . | . | . |
| Vv08g1781    | .            | . | .                  | . | . | . |
| .            | .            | . | .                  | . | . | . |
| Vv08g1782    | .            | . | .                  | . | . | . |
| .            | .            | . | .                  | . | . | . |
| Vv08g1783    | Tc05_g009250 | . | .                  | . | . | . |
| .            | .            | . | .                  | . | . | . |
| Vv08g1784    | .            | . | .                  | . | . | . |
| .            | .            | . | .                  | . | . | . |
| Vv08g1785    | Tc05_g025840 | . | .                  | . | . | . |
| .            | .            | . | .                  | . | . | . |
| Vv08g1786    | Tc05_g025870 | . | .                  | . | . | . |
| .            | .            | . | .                  | . | . | . |
| Vv08g1787    | .            | . | .                  | . | . | . |
| .            | .            | . | .                  | . | . | . |
| Vv08g1788    | Tc05_g016360 | . | .                  | . | . | . |
| .            | .            | . | .                  | . | . | . |
| Vv08g1789    | .            | . | .                  | . | . | . |
| .            | .            | . | .                  | . | . | . |
| Vv08g1790    | Tc05_g016420 | . | .                  | . | . | . |
| .            | .            | . | .                  | . | . | . |
| Vv08g1791    | .            | . | .                  | . | . | . |
| .            | .            | . | .                  | . | . | . |
| Vv08g1792    | Tc05_g016430 | . | .                  | . | . | . |
| .            | Vv13g1211    | . | .                  | . | . | . |
| .            | .            | . | .                  | . | . | . |

|           |              |   |   |   |   |   |
|-----------|--------------|---|---|---|---|---|
| Vv08g1793 | Tc05_g016440 | . | . | . | . | . |
| Vv13g1208 | .            | . | . | . | . | . |
| Vv08g1794 | Tc05_g016550 | . | . | . | . | . |
| Vv08g1795 | Tc05_g016610 | . | . | . | . | . |
| Vv08g1796 | .            | . | . | . | . | . |
| Vv08g1797 | Tc05_g009270 | . | . | . | . | . |
| Vv08g1798 | .            | . | . | . | . | . |
| Vv13g1207 | .            | . | . | . | . | . |
| Vv08g1799 | Tc05_g016710 | . | . | . | . | . |
| Vv13g1197 | .            | . | . | . | . | . |
| Vv08g1800 | Tc05_g016720 | . | . | . | . | . |
| Vv08g1801 | .            | . | . | . | . | . |
| Vv08g1802 | Tc05_g016730 | . | . | . | . | . |
| Vv08g1803 | Tc05_g016740 | . | . | . | . | . |
| Vv08g1804 | .            | . | . | . | . | . |
| Vv08g1805 | .            | . | . | . | . | . |
| Vv08g1806 | Tc05_g026230 | . | . | . | . | . |
| Vv08g1807 | .            | . | . | . | . | . |
| Vv08g1808 | .            | . | . | . | . | . |
| Vv08g1809 | .            | . | . | . | . | . |

|                    |              |                    |                    |   |   |   |   |
|--------------------|--------------|--------------------|--------------------|---|---|---|---|
| Vv08g1810          | .            | .                  | .                  | . | . | . | . |
| .                  | .            | .                  | .                  | . | . | . | . |
| Vv08g1811          | .            | .                  | .                  | . | . | . | . |
| .                  | .            | .                  | .                  | . | . | . | . |
| Vv08g1812          | Tc05_g016790 | .                  | .                  | . | . | . | . |
| .                  | .            | .                  | .                  | . | . | . | . |
| Vv08g1813          | .            | .                  | Gorai.002G230700.1 | . | . | . | . |
| Gorai.007G360500.1 | .            | .                  | .                  | . | . | . | . |
| .                  | .            | .                  | .                  | . | . | . | . |
| Vv08g1814          | .            | .                  | .                  | . | . | . | . |
| .                  | .            | .                  | .                  | . | . | . | . |
| Vv08g1815          | Tc05_g026240 | .                  | .                  | . | . | . | . |
| .                  | .            | .                  | .                  | . | . | . | . |
| Vv08g1816          | Tc05_g016970 | .                  | .                  | . | . | . | . |
| .                  | .            | .                  | .                  | . | . | . | . |
| Vv08g1817          | Tc05_g016980 | .                  | .                  | . | . | . | . |
| .                  | .            | .                  | .                  | . | . | . | . |
| Vv08g1818          | Tc05_g017060 | .                  | .                  | . | . | . | . |
| .                  | .            | .                  | .                  | . | . | . | . |
| Vv08g1819          | Tc05_g017140 | .                  | .                  | . | . | . | . |
| .                  | .            | .                  | .                  | . | . | . | . |
| Vv08g1820          | Tc05_g017160 | .                  | .                  | . | . | . | . |
| .                  | .            | .                  | .                  | . | . | . | . |
| Vv08g1821          | Tc05_g017170 | .                  | .                  | . | . | . | . |
| Gorai.007G360800.1 | .            | .                  | .                  | . | . | . | . |
| Vv08g1822          | Tc05_g009380 | Gorai.006G153900.1 | .                  | . | . | . | . |
| .                  | .            | .                  | .                  | . | . | . | . |
| Vv08g1823          | Tc05_g017210 | Gorai.002G226000.1 | .                  | . | . | . | . |
| .                  | .            | .                  | .                  | . | . | . | . |
| Vv08g1824          | .            | .                  | .                  | . | . | . | . |
| .                  | .            | .                  | .                  | . | . | . | . |
| Vv08g1825          | .            | .                  | .                  | . | . | . | . |
| Vv13g1187          | .            | .                  | .                  | . | . | . | . |
| .                  | .            | .                  | .                  | . | . | . | . |

|              |                    |   |   |   |   |        |   |
|--------------|--------------------|---|---|---|---|--------|---|
| Vv08g1826    | .                  | . | . | . | . | .      | . |
| .            | .                  | . | . | . | . | .      | . |
| Vv08g1827    | .                  | . | . | . | . | .      | . |
| .            | .                  | . | . | . | . | .      | . |
| Vv08g1828    | Tc05_g017220       | . | . | . | . | .      | . |
| .            | .                  | . | . | . | . | .      | . |
| Vv08g1829    | .                  | . | . | . | . | .      | . |
| .            | .                  | . | . | . | . | .      | . |
| Vv08g1830    | Tc05_g017270       | . | . | . | . | .      | . |
| .            | .                  | . | . | . | . | .      | . |
| Vv08g1831    | .                  | . | . | . | . | .      | . |
| .            | .                  | . | . | . | . | .      | . |
| Vv08g1832    | Tc05_g017310       | . | . | . | . | .      | . |
| .            | .                  | . | . | . | . | .      | . |
| Vv08g1833    | Tc05_g017320       | . | . | . | . | .      | . |
| .            | .                  | . | . | . | . | .      | . |
| Vv08g1834    | Tc05_g017330       | . | . | . | . | .      | . |
| .            | .                  | . | . | . | . | .      | . |
| Vv08g1835    | Tc05_g017350       | . | . | . | . | .      | . |
| .            | .                  | . | . | . | . | .      | . |
| Vv08g1836    | .                  | . | . | . | . | .      | . |
| .            | .                  | . | . | . | . | .      | . |
| Vv08g1837    | Tc05_g017360       | . | . | . | . | Gorai. | . |
| 007G357300.1 | Gorai.007G357300.1 | . | . | . | . | .      | . |
| .            | .                  | . | . | . | . | .      | . |
| Vv08g1838    | Tc05_g017370       | . | . | . | . | .      | . |
| .            | .                  | . | . | . | . | .      | . |
| Vv08g1839    | .                  | . | . | . | . | .      | . |
| .            | .                  | . | . | . | . | .      | . |
| Vv08g1840    | .                  | . | . | . | . | .      | . |
| .            | .                  | . | . | . | . | .      | . |
| Vv08g1841    | .                  | . | . | . | . | .      | . |
| .            | .                  | . | . | . | . | .      | . |
| Vv08g1842    | .                  | . | . | . | . | .      | . |

|           |              |   |   |   |   |   |   |
|-----------|--------------|---|---|---|---|---|---|
| .         | .            | . | . | . | . | . | . |
| .         | .            | . | . | . | . | . | . |
| Vv08g1843 | .            | . | . | . | . | . | . |
| .         | .            | . | . | . | . | . | . |
| Vv08g1844 | .            | . | . | . | . | . | . |
| .         | .            | . | . | . | . | . | . |
| Vv08g1845 | Tc05_g017380 | . | . | . | . | . | . |
| .         | .            | . | . | . | . | . | . |
| Vv08g1846 | Tc05_g017390 | . | . | . | . | . | . |
| .         | .            | . | . | . | . | . | . |
| Vv08g1847 | .            | . | . | . | . | . | . |
| .         | .            | . | . | . | . | . | . |
| Vv08g1848 | Tc05_g017440 | . | . | . | . | . | . |
| .         | .            | . | . | . | . | . | . |
| Vv08g1849 | .            | . | . | . | . | . | . |
| .         | .            | . | . | . | . | . | . |
| Vv08g1850 | Tc05_g017460 | . | . | . | . | . | . |
| .         | .            | . | . | . | . | . | . |
| Vv08g1851 | .            | . | . | . | . | . | . |
| .         | .            | . | . | . | . | . | . |
| Vv08g1852 | .            | . | . | . | . | . | . |
| .         | .            | . | . | . | . | . | . |
| Vv08g1853 | .            | . | . | . | . | . | . |
| .         | .            | . | . | . | . | . | . |
| Vv08g1854 | Tc05_g018000 | . | . | . | . | . | . |
| .         | .            | . | . | . | . | . | . |
| Vv08g1855 | .            | . | . | . | . | . | . |
| .         | .            | . | . | . | . | . | . |
| Vv08g1856 | .            | . | . | . | . | . | . |
| .         | .            | . | . | . | . | . | . |
| Vv08g1857 | .            | . | . | . | . | . | . |
| .         | .            | . | . | . | . | . | . |
| Vv08g1858 | .            | . | . | . | . | . | . |
| .         | .            | . | . | . | . | . | . |
| .         | .            | . | . | . | . | . | . |

|              |                    |                    |                    |   |        |   |   |
|--------------|--------------------|--------------------|--------------------|---|--------|---|---|
| Vv08g1859    | .                  | .                  | .                  | . | .      | . | . |
| .            | .                  | .                  | .                  | . | .      | . | . |
| Vv08g1860    | .                  | .                  | .                  | . | .      | . | . |
| .            | .                  | .                  | .                  | . | .      | . | . |
| Vv08g1861    | .                  | .                  | .                  | . | .      | . | . |
| .            | .                  | .                  | .                  | . | .      | . | . |
| Vv08g1862    | .                  | .                  | .                  | . | .      | . | . |
| .            | .                  | .                  | .                  | . | .      | . | . |
| Vv08g1863    | .                  | .                  | .                  | . | .      | . | . |
| .            | .                  | .                  | .                  | . | .      | . | . |
| Vv08g1864    | .                  | .                  | .                  | . | .      | . | . |
| .            | .                  | .                  | .                  | . | .      | . | . |
| Vv08g1865    | .                  | .                  | .                  | . | .      | . | . |
| .            | .                  | .                  | .                  | . | .      | . | . |
| Vv08g1866    | .                  | .                  | .                  | . | .      | . | . |
| .            | .                  | .                  | .                  | . | .      | . | . |
| Vv08g1867    | .                  | .                  | .                  | . | .      | . | . |
| .            | .                  | .                  | .                  | . | .      | . | . |
| Vv09g0001    | .                  | .                  | .                  | . | .      | . | . |
| .            | .                  | .                  | .                  | . | .      | . | . |
| Vv09g0002    | .                  | .                  | .                  | . | .      | . | . |
| .            | .                  | .                  | .                  | . | .      | . | . |
| Vv09g0003    | Tc06_g010930       | .                  | Gorai.010G172400.1 | . | .      | . | . |
|              | Gorai.011G053800.1 | .                  | .                  | . | .      | . | . |
| .            | .                  | .                  | .                  | . | .      | . | . |
| Vv09g0004    | .                  | .                  | .                  | . | .      | . | . |
| .            | .                  | .                  | .                  | . | .      | . | . |
| Vv09g0005    | Tc06_g010910       | .                  | .                  | . | Gorai. | . | . |
| 011G053900.1 | .                  | .                  | .                  | . | .      | . | . |
| .            | .                  | .                  | .                  | . | .      | . | . |
| Vv09g0006    | Tc06_g010900       | Gorai.006G090900.1 | .                  | . | .      | . | . |
|              | Gorai.011G054000.1 | .                  | .                  | . | .      | . | . |
| .            | .                  | .                  | .                  | . | .      | . | . |
| Vv09g0007    | Tc06_g010890       | .                  | Gorai.010G172500.1 | . | .      | . | . |
|              | Gorai.011G054100.1 | .                  | .                  | . | .      | . | . |
| .            | .                  | .                  | .                  | . | .      | . | . |

|                    |              |                    |                    |   |        |   |
|--------------------|--------------|--------------------|--------------------|---|--------|---|
| Vv09g0008          | Tc06_g010880 | .                  | .                  | . | .      | . |
| .                  | .            | .                  | .                  | . | .      | . |
| Vv09g0009          | Tc06_g010860 | .                  | Gorai.010G236300.1 | . | .      | . |
| Gorai.011G054300.1 | .            | .                  | .                  | . | .      | . |
| .                  | .            | .                  | .                  | . | .      | . |
| Vv09g0010          | Tc06_g010850 | Gorai.006G090800.1 | .                  | . | .      | . |
| Gorai.011G054400.1 | .            | .                  | .                  | . | .      | . |
| .                  | .            | .                  | .                  | . | .      | . |
| Vv09g0011          | .            | .                  | .                  | . | .      | . |
| .                  | .            | .                  | .                  | . | .      | . |
| .                  | .            | .                  | .                  | . | .      | . |
| Vv09g0012          | Tc06_g010830 | .                  | .                  | . | Gorai. | . |
| 011G054500.1       | .            | .                  | .                  | . | .      | . |
| .                  | .            | .                  | .                  | . | .      | . |
| Vv09g0013          | Tc06_g010820 | .                  | .                  | . | Gorai. | . |
| 011G054800.1       | .            | .                  | .                  | . | .      | . |
| .                  | .            | .                  | .                  | . | .      | . |
| Vv09g0014          | .            | .                  | .                  | . | .      | . |
| .                  | .            | .                  | .                  | . | .      | . |
| .                  | .            | .                  | .                  | . | .      | . |
| Vv09g0015          | .            | .                  | .                  | . | .      | . |
| .                  | .            | .                  | .                  | . | .      | . |
| .                  | .            | .                  | .                  | . | .      | . |
| Vv09g0016          | Tc06_g010790 | .                  | .                  | . | .      | . |
| .                  | .            | .                  | .                  | . | .      | . |
| .                  | .            | .                  | .                  | . | .      | . |
| Vv09g0017          | .            | .                  | .                  | . | .      | . |
| .                  | .            | .                  | .                  | . | .      | . |
| .                  | .            | .                  | .                  | . | .      | . |
| Vv09g0018          | .            | .                  | .                  | . | .      | . |
| .                  | .            | .                  | .                  | . | .      | . |
| .                  | .            | .                  | .                  | . | .      | . |
| Vv09g0019          | .            | .                  | .                  | . | .      | . |
| Vv11g0016          | Tc09_g006150 | .                  | .                  | . | Gorai. | . |
| 009G039100.1       | .            | .                  | .                  | . | .      | . |
| .                  | .            | .                  | .                  | . | .      | . |
| Vv09g0020          | Tc06_g010770 | .                  | .                  | . | Gorai. | . |
| 011G055100.1       | Vv11g0017    | Tc09_g006160       | .                  | . | .      | . |
| .                  | .            | .                  | .                  | . | .      | . |
| .                  | .            | .                  | .                  | . | .      | . |
| Vv09g0021          | Tc06_g010760 | .                  | .                  | . | Gorai. | . |
| 011G055200.1       | .            | .                  | .                  | . | .      | . |
| .                  | .            | .                  | .                  | . | .      | . |
| Vv09g0022          | Tc06_g010750 | Gorai.006G090500.1 | .                  | . | .      | . |
| Gorai.011G055300.1 | .            | .                  | .                  | . | .      | . |
| .                  | .            | .                  | .                  | . | .      | . |

|                    |                    |                    |                    |   |   |                    |   |
|--------------------|--------------------|--------------------|--------------------|---|---|--------------------|---|
| Vv09g0023          | .                  | .                  | .                  | . | . | .                  | . |
| .                  | .                  | .                  | .                  | . | . | .                  | . |
| Vv09g0024          | Tc06_g010740       | .                  | .                  | . | . | Gorai.             | . |
| 011G055400.1       | .                  | .                  | .                  | . | . | .                  | . |
| Vv09g0025          | Tc06_g010730       | Gorai.006G090400.1 | .                  | . | . | .                  | . |
| Gorai.011G055500.1 | .                  | .                  | .                  | . | . | .                  | . |
| .                  | .                  | .                  | .                  | . | . | .                  | . |
| Vv09g0026          | Tc06_g010720       | Gorai.006G090300.1 | .                  | . | . | .                  | . |
| .                  | Vv11g0023          | Tc09_g006220       | .                  | . | . | .                  | . |
| Gorai.001G018100.1 | .                  | Gorai.009G038700.1 | .                  | . | . | .                  | . |
| .                  | .                  | .                  | .                  | . | . | .                  | . |
| Vv09g0027          | .                  | .                  | .                  | . | . | Gorai.011G055600.1 | . |
| .                  | Vv11g0027          | Tc09_g006260       | Gorai.013G222000.1 | . | . | .                  | . |
| .                  | Gorai.009G038300.1 | .                  | .                  | . | . | .                  | . |
| .                  | .                  | .                  | .                  | . | . | .                  | . |
| Vv09g0028          | Tc06_g010710       | .                  | .                  | . | . | .                  | . |
| .                  | .                  | .                  | .                  | . | . | .                  | . |
| Vv09g0029          | Tc06_g010700       | .                  | Gorai.010G236200.1 | . | . | .                  | . |
| .                  | .                  | .                  | .                  | . | . | .                  | . |
| Vv09g0030          | .                  | .                  | .                  | . | . | .                  | . |
| .                  | .                  | .                  | .                  | . | . | .                  | . |
| Vv09g0031          | Tc06_g010670       | .                  | .                  | . | . | Gorai.             | . |
| 011G055700.1       | .                  | .                  | .                  | . | . | .                  | . |
| .                  | .                  | .                  | .                  | . | . | .                  | . |
| Vv09g0032          | .                  | .                  | .                  | . | . | .                  | . |
| .                  | .                  | .                  | .                  | . | . | .                  | . |
| Vv09g0033          | Tc06_g010630       | .                  | .                  | . | . | .                  | . |
| .                  | .                  | .                  | .                  | . | . | .                  | . |
| Vv09g0034          | Tc06_g010620       | .                  | Gorai.010G236100.1 | . | . | .                  | . |
| Gorai.011G056300.1 | .                  | .                  | .                  | . | . | .                  | . |
| .                  | .                  | .                  | .                  | . | . | .                  | . |
| Vv09g0035          | Tc06_g010600       | .                  | .                  | . | . | .                  | . |
| .                  | .                  | .                  | .                  | . | . | .                  | . |
| Vv09g0036          | Tc06_g010590       | .                  | .                  | . | . | .                  | . |
| .                  | .                  | .                  | .                  | . | . | .                  | . |
| Vv09g0037          | Tc06_g010570       | .                  | .                  | . | . | .                  | . |
| .                  | .                  | .                  | .                  | . | . | .                  | . |
| .                  | .                  | .                  | .                  | . | . | .                  | . |



|                    |                    |   |   |   |                    |        |
|--------------------|--------------------|---|---|---|--------------------|--------|
| Vv09g0038          | Tc06_g010560       | . | . | . | .                  | .      |
| .                  | .                  | . | . | . | .                  | .      |
| Vv09g0039          | .                  | . | . | . | .                  | .      |
| .                  | .                  | . | . | . | .                  | .      |
| Vv09g0040          | Tc06_g010540       | . | . | . | .                  | .      |
| .                  | .                  | . | . | . | .                  | .      |
| Vv09g0041          | .                  | . | . | . | .                  | .      |
| .                  | .                  | . | . | . | .                  | .      |
| Vv09g0042          | Tc06_g010530       | . | . | . | .                  | .      |
| .                  | .                  | . | . | . | .                  | .      |
| Vv09g0043          | Tc06_g010520       | . | . | . | Gorai.010G235900.1 | .      |
| Gorai.011G056600.1 | .                  | . | . | . | Vv11g0030          | .      |
| Tc09_g006300       | Gorai.013G222100.1 | . | . | . | Gorai.001G017800.1 | .      |
| .                  | Gorai.010G092400.1 | . | . | . | .                  | .      |
| .                  | .                  | . | . | . | .                  | .      |
| Vv09g0044          | .                  | . | . | . | .                  | .      |
| .                  | .                  | . | . | . | .                  | .      |
| Vv09g0045          | Tc06_g010510       | . | . | . | Gorai.             | .      |
| 011G056700.1       | .                  | . | . | . | .                  | .      |
| .                  | .                  | . | . | . | .                  | .      |
| Vv09g0046          | .                  | . | . | . | .                  | .      |
| .                  | .                  | . | . | . | .                  | .      |
| Vv09g0047          | Tc06_g010500       | . | . | . | Gorai.             | .      |
| 011G056800.1       | .                  | . | . | . | .                  | .      |
| .                  | .                  | . | . | . | .                  | .      |
| Vv09g0048          | Tc06_g010490       | . | . | . | .                  | .      |
| .                  | .                  | . | . | . | .                  | .      |
| .                  | .                  | . | . | . | .                  | .      |
| Vv09g0049          | Tc06_g010480       | . | . | . | Gorai.             | .      |
| 011G056900.1       | .                  | . | . | . | Vv11g0040          | .      |
| 013G222500.1       | Gorai.001G017600.1 | . | . | . | Tc09_g006350       | Gorai. |
| Gorai.010G092200.1 | .                  | . | . | . | Gorai.009G037800.1 | .      |
| .                  | .                  | . | . | . | .                  | .      |
| Vv09g0050          | Tc06_g010460       | . | . | . | .                  | .      |
| .                  | .                  | . | . | . | .                  | .      |
| .                  | .                  | . | . | . | .                  | .      |
| Vv09g0051          | Tc06_g010450       | . | . | . | Gorai.             | .      |
| 011G057100.1       | .                  | . | . | . | .                  | .      |
| .                  | .                  | . | . | . | .                  | .      |
| Vv09g0052          | .                  | . | . | . | .                  | .      |
| .                  | .                  | . | . | . | .                  | .      |
| .                  | .                  | . | . | . | .                  | .      |
| Vv09g0053          | .                  | . | . | . | .                  | .      |

|                           |                    |                    |
|---------------------------|--------------------|--------------------|
| Vv09g0054                 | Tc06_g010430       | Gorai.010G235700.1 |
| Vv09g0055                 |                    |                    |
| Vv09g0056<br>011G057200.1 | Tc06_g010420       | Gorai.             |
| Vv09g0057<br>011G057300.1 | Tc06_g010410       | Gorai.             |
| Vv09g0058<br>011G057400.1 | Tc06_g010400       | Gorai.             |
| Vv09g0059                 | Tc06_g010390       | Gorai.010G235600.1 |
| Vv09g0060                 | Tc06_g010380       |                    |
| Vv09g0061                 | Tc06_g010360       | Gorai.006G090100.1 |
|                           | Vv11g0050          | Tc09_g006480       |
| Vv09g0062                 |                    |                    |
| Vv09g0063                 | Tc06_g010330       |                    |
| Vv09g0064                 |                    |                    |
| Vv09g0065                 | Tc06_g010320       |                    |
| Vv09g0066                 | Tc06_g010310       |                    |
| Vv09g0067                 | Tc06_g010300       |                    |
| Vv09g0068                 |                    | Vv04g0248          |
| 009G068300.1              | Gorai.001G001600.1 | Gorai.             |
| Vv09g0069                 |                    |                    |

|                    |                    |   |   |                    |   |        |   |
|--------------------|--------------------|---|---|--------------------|---|--------|---|
| .                  | .                  | . | . | .                  | . | .      | . |
| Vv09g0070          | Tc06_g010230       | . | . | Gorai.010G235500.1 | . | .      | . |
| .                  | .                  | . | . | .                  | . | .      | . |
| Vv09g0071          | Tc06_g010220       | . | . | Gorai.010G235400.1 | . | .      | . |
| .                  | .                  | . | . | .                  | . | .      | . |
| Vv09g0072          | .                  | . | . | .                  | . | .      | . |
| .                  | .                  | . | . | .                  | . | .      | . |
| Vv09g0073          | Tc06_g010210       | . | . | .                  | . | .      | . |
| Vv11g0061          | Tc09_g006620       | . | . | .                  | . | .      | . |
| Gorai.009G036800.1 | Gorai.010G090600.1 | . | . | .                  | . | .      | . |
| .                  | .                  | . | . | .                  | . | .      | . |
| Vv09g0074          | Tc06_g010180       | . | . | Gorai.010G235300.1 | . | .      | . |
| .                  | .                  | . | . | .                  | . | .      | . |
| Vv09g0075          | Tc06_g010170       | . | . | .                  | . | .      | . |
| .                  | .                  | . | . | .                  | . | .      | . |
| Vv04g0236          | .                  | . | . | .                  | . | .      | . |
| Vv09g0076          | Tc06_g010160       | . | . | .                  | . | .      | . |
| .                  | .                  | . | . | .                  | . | .      | . |
| .                  | .                  | . | . | .                  | . | .      | . |
| Vv09g0077          | Tc06_g010150       | . | . | .                  | . | .      | . |
| Vv11g0069          | Tc09_g006690       | . | . | Gorai.001G016100.1 | . | .      | . |
| .                  | Gorai.009G036400.1 | . | . | Gorai.010G090100.1 | . | .      | . |
| .                  | .                  | . | . | .                  | . | .      | . |
| Vv09g0078          | Tc06_g010140       | . | . | .                  | . | .      | . |
| Vv11g0070          | Tc09_g006700       | . | . | .                  | . | .      | . |
| Gorai.010G090000.1 | .                  | . | . | .                  | . | .      | . |
| .                  | .                  | . | . | .                  | . | .      | . |
| Vv09g0079          | .                  | . | . | .                  | . | .      | . |
| .                  | .                  | . | . | .                  | . | .      | . |
| .                  | .                  | . | . | .                  | . | .      | . |
| Vv09g0080          | .                  | . | . | .                  | . | .      | . |
| Vv11g0072          | Tc09_g006720       | . | . | Gorai.013G222900.1 | . | Gorai. | . |
| 001G016000.1       | .                  | . | . | Gorai.010G089800.1 | . | .      | . |
| .                  | .                  | . | . | .                  | . | .      | . |
| Vv09g0081          | .                  | . | . | .                  | . | .      | . |
| .                  | .                  | . | . | .                  | . | .      | . |
| .                  | .                  | . | . | .                  | . | .      | . |
| Vv09g0082          | .                  | . | . | .                  | . | .      | . |
| .                  | .                  | . | . | .                  | . | .      | . |
| .                  | .                  | . | . | .                  | . | .      | . |
| Vv09g0083          | .                  | . | . | .                  | . | .      | . |
| .                  | .                  | . | . | .                  | . | .      | . |
| .                  | .                  | . | . | .                  | . | .      | . |
| Vv09g0084          | .                  | . | . | .                  | . | .      | . |
| .                  | .                  | . | . | .                  | . | .      | . |

|           |              |   |                    |                    |   |   |
|-----------|--------------|---|--------------------|--------------------|---|---|
| Vv09g0085 | .            | . | .                  | .                  | . | . |
| Vv11g0082 | .            | . | .                  | .                  | . | . |
| Vv09g0086 | .            | . | .                  | .                  | . | . |
| Vv11g0084 | Tc09_g006790 | . | Gorai.013G223600.1 | .                  | . | . |
| Vv09g0087 | Tc06_g000810 | . | .                  | Gorai.009G116500.1 | . | . |
| Vv09g0088 | .            | . | .                  | .                  | . | . |
| Vv09g0089 | .            | . | .                  | .                  | . | . |
| Vv09g0090 | .            | . | .                  | .                  | . | . |
| Vv09g0091 | .            | . | .                  | .                  | . | . |
| Vv09g0092 | .            | . | .                  | .                  | . | . |
| Vv09g0093 | .            | . | .                  | .                  | . | . |
| Vv09g0094 | .            | . | .                  | .                  | . | . |
| Vv09g0095 | .            | . | .                  | Gorai.011G059700.1 | . | . |
| Vv09g0096 | Tc06_g000510 | . | .                  | Gorai.009G115900.1 | . | . |
| Vv09g0097 | .            | . | .                  | .                  | . | . |
| Vv09g0098 | .            | . | .                  | .                  | . | . |
| Vv09g0099 | .            | . | .                  | .                  | . | . |
| Vv09g0100 | .            | . | .                  | .                  | . | . |

|           |                    |                    |                    |   |   |   |   |
|-----------|--------------------|--------------------|--------------------|---|---|---|---|
| Vv09g0101 | .                  | .                  | .                  | . | . | . | . |
| .         | .                  | .                  | .                  | . | . | . | . |
| Vv09g0102 | .                  | .                  | Gorai.010G235200.1 | . | . | . | . |
| .         | .                  | .                  | .                  | . | . | . | . |
| Vv04g0207 | .                  | .                  | .                  | . | . | . | . |
| Vv09g0103 | .                  | .                  | .                  | . | . | . | . |
| .         | .                  | .                  | .                  | . | . | . | . |
| Vv09g0104 | .                  | .                  | .                  | . | . | . | . |
| .         | .                  | .                  | .                  | . | . | . | . |
| Vv09g0105 | Tc06_g010130       | .                  | .                  | . | . | . | . |
| Vv05g1533 | .                  | .                  | .                  | . | . | . | . |
| .         | .                  | .                  | .                  | . | . | . | . |
| Vv09g0106 | .                  | .                  | .                  | . | . | . | . |
| Vv05g1519 | .                  | .                  | .                  | . | . | . | . |
| .         | .                  | .                  | .                  | . | . | . | . |
| Vv09g0107 | .                  | .                  | .                  | . | . | . | . |
| Vv05g1518 | .                  | .                  | .                  | . | . | . | . |
| .         | .                  | .                  | .                  | . | . | . | . |
| Vv09g0108 | .                  | .                  | .                  | . | . | . | . |
| Vv05g1513 | .                  | .                  | Gorai.005G039700.1 | . | . | . | . |
| .         | .                  | .                  | .                  | . | . | . | . |
| Vv09g0109 | .                  | .                  | .                  | . | . | . | . |
| .         | .                  | .                  | .                  | . | . | . | . |
| .         | .                  | .                  | .                  | . | . | . | . |
| Vv09g0110 | .                  | .                  | .                  | . | . | . | . |
| Vv05g1510 | .                  | .                  | Gorai.005G039800.1 | . | . | . | . |
| .         | .                  | .                  | .                  | . | . | . | . |
| Vv09g0111 | .                  | .                  | .                  | . | . | . | . |
| .         | .                  | .                  | .                  | . | . | . | . |
| .         | .                  | .                  | .                  | . | . | . | . |
| Vv09g0112 | .                  | .                  | .                  | . | . | . | . |
| Vv05g1505 | .                  | .                  | Gorai.005G039900.1 | . | . | . | . |
| .         | .                  | .                  | .                  | . | . | . | . |
| Vv09g0113 | .                  | .                  | .                  | . | . | . | . |
| Vv05g1503 | .                  | .                  | Gorai.005G040000.1 | . | . | . | . |
| .         | .                  | .                  | .                  | . | . | . | . |
| Vv09g0114 | Tc06_g000370       | .                  | .                  | . | . | . | . |
| Vv11g0115 | Tc09_g007080       | .                  | Gorai.001G015400.1 | . | . | . | . |
| .         | Gorai.009G035500.1 | .                  | .                  | . | . | . | . |
| .         | .                  | .                  | .                  | . | . | . | . |
| Vv09g0115 | .                  | .                  | .                  | . | . | . | . |
| .         | .                  | .                  | .                  | . | . | . | . |
| .         | .                  | .                  | .                  | . | . | . | . |
| Vv09g0116 | .                  | .                  | .                  | . | . | . | . |
| Vv11g0118 | Tc09_g007110       | Gorai.013G225300.1 | .                  | . | . | . | . |
| .         | Gorai.009G035200.1 | .                  | .                  | . | . | . | . |
| .         | .                  | .                  | .                  | . | . | . | . |

|              |                    |                    |                    |   |        |   |   |
|--------------|--------------------|--------------------|--------------------|---|--------|---|---|
| Vv09g0117    | .                  | .                  | .                  | . | .      | . | . |
| .            | .                  | .                  | .                  | . | .      | . | . |
| Vv09g0118    | .                  | .                  | .                  | . | .      | . | . |
| .            | .                  | .                  | .                  | . | .      | . | . |
| Vv09g0119    | .                  | .                  | .                  | . | .      | . | . |
| .            | .                  | .                  | .                  | . | .      | . | . |
| Vv09g0120    | .                  | .                  | .                  | . | .      | . | . |
| .            | .                  | .                  | .                  | . | .      | . | . |
| Vv09g0121    | Tc06_g009780       | .                  | .                  | . | .      | . | . |
| .            | .                  | .                  | .                  | . | .      | . | . |
| Vv09g0122    | Tc06_g009740       | .                  | .                  | . | .      | . | . |
| .            | .                  | .                  | .                  | . | .      | . | . |
| Vv09g0123    | .                  | .                  | .                  | . | .      | . | . |
| .            | .                  | .                  | .                  | . | .      | . | . |
| Vv09g0124    | .                  | .                  | .                  | . | .      | . | . |
| .            | .                  | .                  | .                  | . | .      | . | . |
| Vv09g0125    | .                  | .                  | .                  | . | .      | . | . |
| .            | .                  | .                  | .                  | . | .      | . | . |
| Vv09g0126    | .                  | .                  | .                  | . | .      | . | . |
| .            | .                  | .                  | .                  | . | .      | . | . |
| Vv09g0127    | .                  | .                  | .                  | . | .      | . | . |
| .            | .                  | .                  | .                  | . | .      | . | . |
| Vv09g0128    | .                  | .                  | .                  | . | .      | . | . |
| Vv11g0134    | Tc09_g007200       | .                  | Gorai.001G014700.1 | . | .      | . | . |
|              | Gorai.009G041200.1 | .                  | Vv04g0174          | . | .      | . | . |
|              | Gorai.001G020800.1 | .                  | .                  | . | .      | . | . |
| Vv09g0129    | .                  | .                  | .                  | . | .      | . | . |
| .            | .                  | .                  | .                  | . | .      | . | . |
| Vv09g0130    | .                  | .                  | .                  | . | .      | . | . |
| .            | .                  | .                  | .                  | . | .      | . | . |
| Vv09g0131    | .                  | Gorai.010G234400.1 | .                  | . | .      | . | . |
| .            | .                  | .                  | .                  | . | .      | . | . |
| Vv09g0132    | .                  | .                  | .                  | . | .      | . | . |
| Vv11g0141    | Tc09_g007270       | .                  | .                  | . | Gorai. | . | . |
| 009G041500.1 | Gorai.010G086600.1 | .                  | Vv04g0169          | . | .      | . | . |
|              | Gorai.001G021000.1 | .                  | .                  | . | .      | . | . |

|              |                    |   |                    |           |                    |   |   |
|--------------|--------------------|---|--------------------|-----------|--------------------|---|---|
| Vv09g0133    | .                  | . | .                  | .         | .                  | . | . |
| .            | .                  | . | .                  | .         | .                  | . | . |
| .            | .                  | . | .                  | .         | .                  | . | . |
| Vv09g0134    | .                  | . | .                  | .         | .                  | . | . |
| Vv11g0142    | Tc09_g007280       | . | Gorai.013G226100.1 | .         | .                  | . | . |
|              | Gorai.009G034500.1 | . | Gorai.010G086500.1 | .         | .                  | . | . |
| .            | .                  | . | .                  | .         | .                  | . | . |
| Vv09g0135    | Tc06_g011930       | . | Gorai.006G095300.1 | .         | Gorai.             | . | . |
| 010G234300.1 | .                  | . | .                  | Vv11g0143 | .                  | . | . |
| Tc09_g007290 | .                  | . | .                  | .         | Gorai.010G086400.1 | . | . |
| .            | .                  | . | .                  | .         | .                  | . | . |
| Vv09g0136    | .                  | . | Gorai.010G234100.1 | .         | .                  | . | . |
| .            | .                  | . | .                  | .         | .                  | . | . |
| .            | .                  | . | .                  | .         | .                  | . | . |
| Vv09g0137    | Tc06_g011630       | . | .                  | .         | .                  | . | . |
| .            | .                  | . | .                  | .         | .                  | . | . |
| .            | .                  | . | .                  | .         | .                  | . | . |
| Vv09g0138    | .                  | . | .                  | .         | .                  | . | . |
| .            | .                  | . | .                  | .         | .                  | . | . |
| .            | .                  | . | .                  | .         | .                  | . | . |
| Vv09g0139    | .                  | . | .                  | .         | .                  | . | . |
| .            | .                  | . | .                  | .         | .                  | . | . |
| .            | .                  | . | .                  | .         | .                  | . | . |
| Vv09g0140    | .                  | . | .                  | .         | .                  | . | . |
| Vv11g0146    | Tc09_g007320       | . | Gorai.013G226400.1 | .         | .                  | . | . |
|              | Gorai.009G041700.1 | . | Gorai.010G086100.1 | .         | Vv04g0166          | . | . |
| .            | Gorai.013G226400.1 | . | Gorai.001G021300.1 | .         | .                  | . | . |
| .            | .                  | . | .                  | .         | .                  | . | . |
| Vv09g0141    | .                  | . | .                  | .         | .                  | . | . |
| .            | .                  | . | .                  | .         | .                  | . | . |
| .            | .                  | . | .                  | .         | .                  | . | . |
| Vv09g0142    | .                  | . | .                  | .         | Gorai.011G062600.1 | . | . |
| .            | .                  | . | .                  | .         | .                  | . | . |
| .            | .                  | . | .                  | .         | .                  | . | . |
| Vv09g0143    | .                  | . | .                  | .         | .                  | . | . |
| .            | .                  | . | .                  | .         | .                  | . | . |
| .            | .                  | . | .                  | .         | .                  | . | . |
| Vv09g0144    | .                  | . | .                  | .         | .                  | . | . |
| .            | .                  | . | .                  | .         | .                  | . | . |
| .            | .                  | . | .                  | .         | .                  | . | . |
| Vv09g0145    | .                  | . | .                  | .         | .                  | . | . |
| .            | .                  | . | .                  | .         | .                  | . | . |
| .            | .                  | . | .                  | .         | .                  | . | . |
| Vv09g0146    | .                  | . | .                  | .         | .                  | . | . |
| .            | .                  | . | .                  | .         | .                  | . | . |
| .            | .                  | . | .                  | .         | .                  | . | . |
| Vv09g0147    | .                  | . | .                  | .         | .                  | . | . |
| .            | .                  | . | .                  | .         | .                  | . | . |
| .            | .                  | . | .                  | .         | .                  | . | . |
| Vv09g0148    | .                  | . | .                  | .         | .                  | . | . |

|           |              |   |                    |   |   |   |   |
|-----------|--------------|---|--------------------|---|---|---|---|
| .         | .            | . | .                  | . | . | . | . |
| Vv09g0149 | .            | . | .                  | . | . | . | . |
| Vv09g0150 | .            | . | .                  | . | . | . | . |
| Vv09g0151 | .            | . | .                  | . | . | . | . |
| Vv09g0152 | .            | . | .                  | . | . | . | . |
| Vv09g0153 | .            | . | .                  | . | . | . | . |
| Vv09g0154 | .            | . | Gorai.010G232800.1 | . | . | . | . |
| Vv09g0155 | .            | . | .                  | . | . | . | . |
| Vv09g0156 | .            | . | .                  | . | . | . | . |
| Vv09g0157 | Tc06_g019130 | . | .                  | . | . | . | . |
| Vv09g0158 | .            | . | .                  | . | . | . | . |
| Vv09g0159 | Tc06_g009410 | . | .                  | . | . | . | . |
| Vv09g0160 | .            | . | .                  | . | . | . | . |
| Vv09g0161 | .            | . | .                  | . | . | . | . |
| Vv09g0162 | .            | . | .                  | . | . | . | . |
| Vv09g0163 | .            | . | .                  | . | . | . | . |
| Vv09g0164 | .            | . | .                  | . | . | . | . |
| .         | .            | . | .                  | . | . | . | . |



|              |                    |   |                    |                    |
|--------------|--------------------|---|--------------------|--------------------|
| Vv09g0165    | Tc06_g005930       | . | .                  | Gorai.009G119900.1 |
| .            | .                  | . | .                  | .                  |
| Vv09g0166    | .                  | . | .                  | .                  |
| .            | .                  | . | .                  | .                  |
| Vv09g0167    | .                  | . | .                  | .                  |
| .            | .                  | . | .                  | .                  |
| Vv09g0168    | .                  | . | .                  | .                  |
| .            | .                  | . | .                  | .                  |
| Vv09g0169    | .                  | . | .                  | .                  |
| .            | .                  | . | .                  | .                  |
| Vv09g0170    | .                  | . | .                  | .                  |
| .            | .                  | . | .                  | Vv04g0141          |
| .            | Gorai.013G220700.1 | . | Gorai.001G021800.1 | .                  |
| .            | .                  | . | .                  | .                  |
| Vv09g0171    | .                  | . | .                  | .                  |
| Vv11g0164    | .                  | . | .                  | .                  |
| .            | .                  | . | .                  | .                  |
| Vv09g0172    | Tc06_g018970       | . | .                  | Gorai.             |
| 011G062700.1 | .                  | . | .                  | .                  |
| .            | .                  | . | .                  | .                  |
| Vv09g0173    | .                  | . | .                  | .                  |
| .            | .                  | . | .                  | .                  |
| Vv09g0174    | .                  | . | .                  | .                  |
| .            | .                  | . | .                  | .                  |
| Vv09g0175    | .                  | . | .                  | .                  |
| .            | .                  | . | .                  | .                  |
| Vv09g0176    | .                  | . | .                  | .                  |
| .            | .                  | . | .                  | .                  |
| Vv09g0177    | .                  | . | .                  | .                  |
| .            | .                  | . | .                  | .                  |
| Vv09g0178    | .                  | . | .                  | .                  |
| .            | .                  | . | .                  | .                  |
| Vv09g0179    | .                  | . | .                  | .                  |
| .            | .                  | . | .                  | .                  |
| Vv09g0180    | .                  | . | .                  | .                  |
| .            | .                  | . | .                  | .                  |
| Vv09g0181    | Tc06_g009200       | . | .                  | .                  |

|              |                    |                    |   |   |   |        |   |
|--------------|--------------------|--------------------|---|---|---|--------|---|
| .            | .                  | .                  | . | . | . | .      | . |
| .            | .                  | .                  | . | . | . | .      | . |
| Vv09g0182    | .                  | .                  | . | . | . | .      | . |
| .            | .                  | .                  | . | . | . | .      | . |
| Vv09g0183    | Tc06_g018960       | .                  | . | . | . | .      | . |
| .            | .                  | .                  | . | . | . | .      | . |
| Vv09g0184    | .                  | .                  | . | . | . | .      | . |
| .            | .                  | .                  | . | . | . | .      | . |
| Vv09g0185    | Tc06_g009090       | .                  | . | . | . | Gorai. | . |
| 011G063400.1 | Vv11g0188          | Tc09_g007590       | . | . | . | .      | . |
| .            | .                  | .                  | . | . | . | .      | . |
| Vv09g0186    | .                  | .                  | . | . | . | .      | . |
| .            | .                  | .                  | . | . | . | .      | . |
| Vv09g0187    | .                  | .                  | . | . | . | .      | . |
| .            | .                  | .                  | . | . | . | .      | . |
| Vv09g0188    | .                  | .                  | . | . | . | .      | . |
| .            | .                  | .                  | . | . | . | .      | . |
| Vv09g0189    | .                  | .                  | . | . | . | .      | . |
| .            | .                  | .                  | . | . | . | .      | . |
| Vv09g0190    | .                  | .                  | . | . | . | .      | . |
| .            | .                  | .                  | . | . | . | .      | . |
| Vv09g0191    | .                  | .                  | . | . | . | .      | . |
| .            | .                  | .                  | . | . | . | .      | . |
| Vv09g0192    | .                  | .                  | . | . | . | .      | . |
| Vv11g0217    | Tc09_g007860       | .                  | . | . | . | Gorai. | . |
| 009G031600.1 | Gorai.010G083100.1 | .                  | . | . | . | .      | . |
| .            | .                  | .                  | . | . | . | .      | . |
| Vv09g0193    | .                  | .                  | . | . | . | .      | . |
| .            | .                  | .                  | . | . | . | .      | . |
| Vv09g0194    | .                  | .                  | . | . | . | .      | . |
| .            | .                  | .                  | . | . | . | .      | . |
| Vv09g0195    | .                  | .                  | . | . | . | .      | . |
| .            | .                  | .                  | . | . | . | .      | . |
| Vv09g0196    | .                  | .                  | . | . | . | .      | . |
| .            | .                  | .                  | . | . | . | .      | . |
| Vv09g0197    | Tc06_g008950       | Gorai.010G232400.1 | . | . | . | .      | . |

|                    |                    |              |   |                    |   |        |   |
|--------------------|--------------------|--------------|---|--------------------|---|--------|---|
| .                  | .                  | .            | . | .                  | . | .      | . |
| .                  | .                  | .            | . | .                  | . | .      | . |
| Vv09g0198          | Tc06_g008940       | .            | . | .                  | . | Gorai. | . |
| 011G064300.1       | .                  | .            | . | .                  | . | .      | . |
| .                  | .                  | .            | . | .                  | . | .      | . |
| Vv09g0199          | Tc06_g008930       | .            | . | .                  | . | .      | . |
| .                  | .                  | .            | . | .                  | . | .      | . |
| Vv09g0200          | Tc06_g008920       | .            | . | Gorai.010G232300.1 | . | .      | . |
| Gorai.011G064400.1 | .                  | .            | . | .                  | . | .      | . |
| .                  | .                  | .            | . | .                  | . | .      | . |
| .                  | .                  | .            | . | .                  | . | .      | . |
| Vv09g0201          | Tc06_g008910       | .            | . | .                  | . | .      | . |
| .                  | .                  | .            | . | .                  | . | .      | . |
| .                  | .                  | .            | . | .                  | . | .      | . |
| Vv09g0202          | .                  | .            | . | .                  | . | .      | . |
| .                  | .                  | .            | . | .                  | . | .      | . |
| .                  | .                  | .            | . | .                  | . | .      | . |
| Vv09g0203          | Tc06_g006270       | .            | . | Gorai.009G118300.1 | . | .      | . |
| .                  | .                  | .            | . | .                  | . | .      | . |
| .                  | .                  | .            | . | .                  | . | .      | . |
| Vv09g0204          | Tc06_g008870       | .            | . | .                  | . | Gorai. | . |
| 011G064600.1       | .                  | .            | . | .                  | . | .      | . |
| .                  | .                  | .            | . | .                  | . | .      | . |
| Vv09g0205          | .                  | .            | . | .                  | . | .      | . |
| .                  | .                  | .            | . | .                  | . | .      | . |
| .                  | .                  | .            | . | .                  | . | .      | . |
| Vv09g0206          | Tc06_g008850       | .            | . | .                  | . | .      | . |
| Vv11g0221          | Tc09_g007920       | .            | . | Gorai.001G011600.1 | . | .      | . |
| .                  | Gorai.010G082900.1 | .            | . | .                  | . | .      | . |
| .                  | .                  | .            | . | .                  | . | .      | . |
| Vv09g0207          | Tc06_g008840       | .            | . | .                  | . | Gorai. | . |
| 011G064700.1       | .                  | .            | . | .                  | . | .      | . |
| .                  | Vv04g0113          | Tc01_g029920 | . | .                  | . | .      | . |
| .                  | Gorai.011G064700.1 | .            | . | .                  | . | .      | . |
| Vv09g0208          | Tc06_g008830       | .            | . | .                  | . | Gorai. | . |
| 011G064800.1       | .                  | .            | . | .                  | . | .      | . |
| .                  | .                  | .            | . | .                  | . | .      | . |
| Vv09g0209          | .                  | .            | . | Gorai.011G064900.1 | . | .      | . |
| .                  | .                  | .            | . | .                  | . | .      | . |
| .                  | .                  | .            | . | .                  | . | .      | . |
| Vv04g0111          | .                  | .            | . | .                  | . | Gorai. | . |
| 003G057000.1       | .                  | .            | . | .                  | . | .      | . |
| Vv09g0210          | .                  | .            | . | .                  | . | .      | . |
| .                  | .                  | .            | . | .                  | . | .      | . |
| .                  | .                  | .            | . | .                  | . | .      | . |
| Vv09g0211          | .                  | .            | . | Gorai.011G065100.1 | . | .      | . |
| .                  | .                  | .            | . | .                  | . | .      | . |
| .                  | .                  | .            | . | .                  | . | .      | . |
| Vv09g0212          | .                  | .            | . | .                  | . | .      | . |
| .                  | .                  | .            | . | .                  | . | .      | . |

|           |                    |                    |                    |   |
|-----------|--------------------|--------------------|--------------------|---|
| Vv09g0213 | Tc06_g006880       | Gorai.006G094600.1 | .                  | . |
| .         | .                  | .                  | .                  | . |
| Vv09g0214 | .                  | .                  | .                  | . |
| .         | .                  | .                  | .                  | . |
| Vv09g0215 | .                  | .                  | .                  | . |
| .         | .                  | .                  | .                  | . |
| Vv09g0216 | .                  | .                  | Gorai.011G066300.1 | . |
| .         | Vv11g0236          | Tc09_g008010       | Gorai.013G227900.1 | . |
| .         | Gorai.004G284100.1 | .                  | .                  | . |
| .         | .                  | .                  | .                  | . |
| Vv09g0217 | .                  | .                  | Gorai.011G066400.1 | . |
| .         | .                  | .                  | .                  | . |
| .         | .                  | .                  | .                  | . |
| Vv09g0218 | .                  | .                  | .                  | . |
| .         | .                  | .                  | .                  | . |
| .         | .                  | .                  | .                  | . |
| Vv09g0219 | .                  | .                  | .                  | . |
| .         | .                  | .                  | .                  | . |
| .         | .                  | .                  | .                  | . |
| Vv09g0220 | .                  | .                  | .                  | . |
| .         | .                  | .                  | .                  | . |
| .         | .                  | .                  | .                  | . |
| Vv09g0221 | .                  | .                  | .                  | . |
| .         | .                  | .                  | .                  | . |
| .         | .                  | .                  | .                  | . |
| Vv09g0222 | .                  | .                  | Gorai.011G067000.1 | . |
| .         | .                  | .                  | .                  | . |
| .         | .                  | .                  | .                  | . |
| Vv09g0223 | .                  | .                  | Gorai.011G067300.1 | . |
| .         | Vv11g0250          | Tc09_g008190       | .                  | . |
| .         | Gorai.009G030700.1 | .                  | Vv04g0087          | . |
| .         | .                  | Gorai.011G067300.1 | .                  | . |
| .         | .                  | .                  | .                  | . |
| .         | .                  | .                  | .                  | . |
| Vv09g0224 | .                  | .                  | .                  | . |
| .         | .                  | .                  | .                  | . |
| .         | .                  | .                  | .                  | . |
| Vv09g0225 | .                  | .                  | Gorai.011G067400.1 | . |
| .         | Vv11g0258          | .                  | Gorai.001G023300.1 | . |
| .         | Gorai.009G046000.1 | .                  | Vv04g0083          | . |
| .         | Gorai.001G023300.1 | .                  | Gorai.003G060000.1 | . |
| .         | Gorai.011G067400.1 | .                  | .                  | . |
| Vv09g0226 | .                  | .                  | .                  | . |
| .         | .                  | .                  | .                  | . |
| .         | .                  | .                  | .                  | . |
| Vv09g0227 | Tc06_g014380       | .                  | .                  | . |
| .         | .                  | .                  | .                  | . |
| .         | .                  | .                  | .                  | . |

|                    |                    |           |                    |                    |   |                    |   |
|--------------------|--------------------|-----------|--------------------|--------------------|---|--------------------|---|
| Vv09g0228          | .                  | .         | .                  | .                  | . | .                  | . |
| .                  | .                  | .         | .                  | .                  | . | .                  | . |
| Vv09g0229          | .                  | .         | .                  | .                  | . | .                  | . |
| .                  | .                  | .         | .                  | .                  | . | .                  | . |
| Vv09g0230          | .                  | .         | .                  | .                  | . | .                  | . |
| .                  | .                  | .         | .                  | .                  | . | .                  | . |
| Vv09g0231          | .                  | .         | .                  | .                  | . | Gorai.011G067700.1 | . |
| .                  | .                  | .         | .                  | .                  | . | .                  | . |
| Vv09g0232          | .                  | .         | .                  | .                  | . | .                  | . |
| .                  | .                  | .         | .                  | .                  | . | .                  | . |
| Vv09g0233          | .                  | .         | .                  | .                  | . | Gorai.011G067800.1 | . |
| .                  | .                  | .         | .                  | .                  | . | .                  | . |
| Vv09g0234          | .                  | .         | .                  | Gorai.010G231600.1 | . | .                  | . |
| Gorai.011G067900.1 | .                  | .         | .                  | .                  | . | .                  | . |
| .                  | .                  | Vv04g0078 | .                  | .                  | . | .                  | . |
| .                  | Gorai.011G067900.1 | .         | .                  | .                  | . | .                  | . |
| Vv09g0235          | .                  | .         | .                  | .                  | . | Gorai.011G068100.1 | . |
| .                  | .                  | .         | .                  | .                  | . | .                  | . |
| Vv09g0236          | .                  | .         | .                  | Gorai.010G231400.1 | . | .                  | . |
| Gorai.011G068200.1 | .                  | .         | .                  | .                  | . | .                  | . |
| .                  | .                  | .         | .                  | .                  | . | .                  | . |
| Vv09g0237          | .                  | .         | .                  | Gorai.010G229100.1 | . | .                  | . |
| .                  | .                  | .         | .                  | .                  | . | .                  | . |
| Vv09g0238          | .                  | .         | .                  | .                  | . | Gorai.011G068300.1 | . |
| .                  | .                  | .         | .                  | .                  | . | .                  | . |
| Vv09g0239          | .                  | .         | .                  | .                  | . | Gorai.011G068400.1 | . |
| .                  | Vv11g0275          | .         | Tc09_g008440       | .                  | . | .                  | . |
| Gorai.009G029600.1 | .                  | .         | Gorai.010G080300.1 | .                  | . | .                  | . |
| Vv09g0240          | .                  | .         | .                  | .                  | . | .                  | . |
| .                  | .                  | .         | .                  | .                  | . | .                  | . |
| Vv09g0241          | .                  | .         | .                  | .                  | . | .                  | . |
| .                  | .                  | .         | .                  | .                  | . | .                  | . |
| Vv09g0242          | .                  | .         | .                  | .                  | . | .                  | . |
| .                  | .                  | .         | .                  | .                  | . | .                  | . |
| Vv09g0243          | .                  | .         | .                  | .                  | . | .                  | . |
| .                  | .                  | .         | .                  | .                  | . | .                  | . |

|                    |                    |                    |   |   |                    |                    |   |
|--------------------|--------------------|--------------------|---|---|--------------------|--------------------|---|
| Vv09g0244          | .                  | .                  | . | . | .                  | .                  | . |
| .                  | .                  | .                  | . | . | .                  | .                  | . |
| Vv09g0245          | .                  | .                  | . | . | .                  | Gorai.011G068900.1 | . |
| .                  | .                  | .                  | . | . | .                  | .                  | . |
| Vv04g0069          | .                  | .                  | . | . | .                  | Gorai.             | . |
| 003G060300.1       | Gorai.011G068900.1 | .                  | . | . | .                  | .                  | . |
| Vv09g0246          | .                  | .                  | . | . | .                  | Gorai.011G069100.1 | . |
| .                  | .                  | .                  | . | . | .                  | .                  | . |
| Vv09g0247          | .                  | .                  | . | . | .                  | .                  | . |
| .                  | .                  | .                  | . | . | .                  | Vv04g0065          | . |
| .                  | .                  | Gorai.001G024100.1 | . | . | .                  | .                  | . |
| Vv09g0248          | .                  | .                  | . | . | .                  | .                  | . |
| .                  | .                  | .                  | . | . | .                  | .                  | . |
| Vv09g0249          | .                  | .                  | . | . | .                  | .                  | . |
| .                  | .                  | .                  | . | . | .                  | .                  | . |
| Vv09g0250          | .                  | .                  | . | . | .                  | .                  | . |
| .                  | .                  | .                  | . | . | .                  | Vv04g0064          | . |
| .                  | .                  | .                  | . | . | Gorai.003G060400.1 | .                  | . |
| Vv09g0251          | .                  | .                  | . | . | .                  | Gorai.011G069200.1 | . |
| .                  | .                  | .                  | . | . | .                  | .                  | . |
| Vv09g0252          | .                  | .                  | . | . | .                  | .                  | . |
| .                  | .                  | .                  | . | . | .                  | .                  | . |
| Vv09g0253          | Tc06_g007020       | .                  | . | . | .                  | Gorai.009G115900.1 | . |
| .                  | .                  | .                  | . | . | .                  | .                  | . |
| Vv09g0254          | .                  | .                  | . | . | .                  | .                  | . |
| .                  | .                  | .                  | . | . | .                  | .                  | . |
| Vv09g0255          | .                  | .                  | . | . | .                  | .                  | . |
| .                  | .                  | .                  | . | . | .                  | .                  | . |
| Vv09g0256          | .                  | .                  | . | . | .                  | .                  | . |
| Vv11g0276          | Tc09_g008450       | Gorai.013G228900.1 | . | . | Gorai.             | .                  | . |
| 001G010300.1       | Gorai.004G283100.1 | Gorai.009G029400.1 | . | . | .                  | .                  | . |
| Gorai.010G080200.1 | Vv04g0061          | .                  | . | . | .                  | .                  | . |
| .                  | .                  | .                  | . | . | .                  | .                  | . |
| Vv09g0257          | .                  | .                  | . | . | .                  | .                  | . |
| .                  | .                  | .                  | . | . | .                  | .                  | . |
| Vv09g0258          | .                  | .                  | . | . | .                  | .                  | . |
| .                  | .                  | .                  | . | . | .                  | .                  | . |
| Vv09g0259          | .                  | .                  | . | . | .                  | .                  | . |

|           |              |   |   |   |                    |   |   |
|-----------|--------------|---|---|---|--------------------|---|---|
| .         | .            | . | . | . | .                  | . | . |
| Vv09g0260 | Tc06_g014130 | . | . | . | .                  | . | . |
| .         | .            | . | . | . | .                  | . | . |
| Vv09g0261 | .            | . | . | . | .                  | . | . |
| .         | .            | . | . | . | .                  | . | . |
| Vv09g0262 | .            | . | . | . | .                  | . | . |
| .         | .            | . | . | . | .                  | . | . |
| Vv09g0263 | Tc06_g014110 | . | . | . | .                  | . | . |
| .         | .            | . | . | . | .                  | . | . |
| Vv09g0264 | .            | . | . | . | .                  | . | . |
| .         | .            | . | . | . | .                  | . | . |
| Vv09g0265 | .            | . | . | . | .                  | . | . |
| .         | .            | . | . | . | .                  | . | . |
| Vv09g0266 | .            | . | . | . | .                  | . | . |
| .         | .            | . | . | . | .                  | . | . |
| Vv09g0267 | .            | . | . | . | .                  | . | . |
| .         | .            | . | . | . | .                  | . | . |
| Vv09g0268 | .            | . | . | . | .                  | . | . |
| .         | .            | . | . | . | .                  | . | . |
| Vv09g0269 | .            | . | . | . | .                  | . | . |
| .         | .            | . | . | . | .                  | . | . |
| Vv09g0270 | Tc06_g013970 | . | . | . | .                  | . | . |
| .         | .            | . | . | . | .                  | . | . |
| Vv09g0271 | .            | . | . | . | .                  | . | . |
| .         | .            | . | . | . | .                  | . | . |
| Vv09g0272 | .            | . | . | . | .                  | . | . |
| .         | .            | . | . | . | .                  | . | . |
| Vv09g0273 | .            | . | . | . | .                  | . | . |
| .         | .            | . | . | . | .                  | . | . |
| Vv09g0274 | Tc06_g013700 | . | . | . | .                  | . | . |
| .         | .            | . | . | . | .                  | . | . |
| Vv09g0275 | .            | . | . | . | Gorai.011G069400.1 | . | . |
| .         | .            | . | . | . | .                  | . | . |
| .         | .            | . | . | . | .                  | . | . |

|                    |              |   |   |   |                    |
|--------------------|--------------|---|---|---|--------------------|
| Vv09g0276          | Tc06_g007030 | . | . | . | Gorai.             |
| 011G069500.1       | .            | . | . | . | .                  |
| .                  | .            | . | . | . | .                  |
| Vv09g0277          | .            | . | . | . | .                  |
| .                  | .            | . | . | . | .                  |
| .                  | .            | . | . | . | .                  |
| Vv09g0278          | .            | . | . | . | .                  |
| Vv11g0282          | Tc09_g008510 | . | . | . | .                  |
| Gorai.010G079700.1 | .            | . | . | . | .                  |
| .                  | .            | . | . | . | .                  |
| Vv09g0279          | .            | . | . | . | .                  |
| .                  | .            | . | . | . | .                  |
| .                  | .            | . | . | . | .                  |
| Vv09g0280          | Tc06_g007080 | . | . | . | .                  |
| .                  | .            | . | . | . | .                  |
| .                  | .            | . | . | . | .                  |
| Vv09g0281          | .            | . | . | . | .                  |
| .                  | .            | . | . | . | .                  |
| .                  | .            | . | . | . | .                  |
| Vv09g0282          | Tc06_g007100 | . | . | . | Gorai.             |
| 011G069900.1       | .            | . | . | . | .                  |
| .                  | .            | . | . | . | .                  |
| Vv09g0283          | .            | . | . | . | .                  |
| .                  | .            | . | . | . | .                  |
| .                  | .            | . | . | . | .                  |
| Vv09g0284          | Tc06_g000510 | . | . | . | Gorai.009G115900.1 |
| .                  | .            | . | . | . | .                  |
| .                  | .            | . | . | . | .                  |
| Vv09g0285          | .            | . | . | . | .                  |
| .                  | .            | . | . | . | .                  |
| .                  | .            | . | . | . | .                  |
| Vv09g0286          | Tc06_g007110 | . | . | . | Gorai.             |
| 011G070000.1       | .            | . | . | . | .                  |
| .                  | .            | . | . | . | .                  |
| Vv09g0287          | .            | . | . | . | .                  |
| .                  | .            | . | . | . | .                  |
| .                  | .            | . | . | . | .                  |
| Vv09g0288          | Tc06_g013690 | . | . | . | .                  |
| .                  | .            | . | . | . | .                  |
| .                  | .            | . | . | . | .                  |
| Vv09g0289          | .            | . | . | . | .                  |
| .                  | .            | . | . | . | .                  |
| .                  | .            | . | . | . | .                  |
| Vv09g0290          | .            | . | . | . | .                  |
| .                  | .            | . | . | . | .                  |
| .                  | .            | . | . | . | .                  |
| Vv09g0291          | .            | . | . | . | .                  |
| .                  | .            | . | . | . | .                  |
| .                  | .            | . | . | . | .                  |
| Vv09g0292          | .            | . | . | . | .                  |



|                    |                    |                    |   |   |   |        |   |
|--------------------|--------------------|--------------------|---|---|---|--------|---|
| .                  | .                  | .                  | . | . | . | .      | . |
| .                  | .                  | .                  | . | . | . | .      | . |
| Vv09g0293          | .                  | .                  | . | . | . | .      | . |
| .                  | .                  | .                  | . | . | . | .      | . |
| Vv09g0294          | Tc06_g013560       | .                  | . | . | . | .      | . |
| .                  | .                  | .                  | . | . | . | .      | . |
| Vv09g0295          | .                  | .                  | . | . | . | .      | . |
| .                  | .                  | .                  | . | . | . | .      | . |
| Vv09g0296          | Tc06_g007120       | .                  | . | . | . | Gorai. | . |
| 011G070100.1       | .                  | .                  | . | . | . | .      | . |
| .                  | .                  | .                  | . | . | . | .      | . |
| Vv09g0297          | Tc06_g007130       | .                  | . | . | . | .      | . |
| .                  | .                  | .                  | . | . | . | .      | . |
| Vv09g0298          | .                  | .                  | . | . | . | .      | . |
| .                  | .                  | .                  | . | . | . | .      | . |
| Vv09g0299          | Tc06_g007150       | .                  | . | . | . | Gorai. | . |
| 011G070300.1       | .                  | .                  | . | . | . | .      | . |
| .                  | .                  | .                  | . | . | . | .      | . |
| Vv09g0300          | .                  | .                  | . | . | . | .      | . |
| .                  | .                  | .                  | . | . | . | .      | . |
| Vv09g0301          | Tc06_g007170       | .                  | . | . | . | .      | . |
| Vv11g0293          | Tc09_g008600       | Gorai.013G229300.1 | . | . | . | .      | . |
| Gorai.004G282800.1 | .                  | .                  | . | . | . | .      | . |
| .                  | .                  | .                  | . | . | . | .      | . |
| Vv09g0302          | .                  | .                  | . | . | . | .      | . |
| .                  | .                  | .                  | . | . | . | .      | . |
| Vv09g0303          | .                  | .                  | . | . | . | .      | . |
| .                  | .                  | .                  | . | . | . | .      | . |
| Vv09g0304          | Tc06_g007180       | .                  | . | . | . | .      | . |
| Vv11g0297          | Tc09_g008650       | .                  | . | . | . | .      | . |
| Gorai.010G078600.1 | .                  | .                  | . | . | . | .      | . |
| .                  | .                  | .                  | . | . | . | .      | . |
| Vv09g0305          | Tc06_g007190       | .                  | . | . | . | .      | . |
| .                  | .                  | .                  | . | . | . | .      | . |
| Vv09g0306          | Tc06_g007200       | .                  | . | . | . | .      | . |
| .                  | .                  | .                  | . | . | . | .      | . |
| Vv09g0307          | Tc06_g007230       | .                  | . | . | . | .      | . |
| Vv11g0301          | Tc09_g008690       | Gorai.             | . | . | . | .      | . |
| 004G282400.1       | Gorai.009G028400.1 | Gorai.010G078400.1 | . | . | . | .      | . |
| .                  | .                  | .                  | . | . | . | .      | . |

|                    |                    |                    |   |                    |        |   |
|--------------------|--------------------|--------------------|---|--------------------|--------|---|
| Vv09g0308          | Tc06_g000590       | .                  | . | .                  | .      | . |
| .                  | .                  | .                  | . | .                  | .      | . |
| Vv09g0309          | .                  | .                  | . | .                  | .      | . |
| .                  | .                  | .                  | . | .                  | .      | . |
| Vv09g0310          | Tc06_g000660       | .                  | . | .                  | .      | . |
| .                  | .                  | .                  | . | .                  | .      | . |
| Vv09g0311          | .                  | .                  | . | .                  | .      | . |
| .                  | .                  | .                  | . | .                  | .      | . |
| Vv09g0312          | Tc06_g000670       | .                  | . | .                  | .      | . |
| .                  | .                  | .                  | . | .                  | .      | . |
| Vv09g0313          | Tc06_g007240       | Gorai.006G096500.1 | . | .                  | .      | . |
| .                  | .                  | .                  | . | .                  | .      | . |
| Vv09g0314          | Tc06_g007250       | .                  | . | .                  | Gorai. | . |
| 011G070600.1       | .                  | .                  | . | .                  | .      | . |
| .                  | .                  | .                  | . | .                  | .      | . |
| Vv09g0315          | Tc06_g007260       | .                  | . | .                  | .      | . |
| Vv11g0311          | Tc09_g008800       | .                  | . | Gorai.001G009300.1 | .      | . |
| Gorai.004G282000.1 | Gorai.009G027900.1 | .                  | . | .                  | .      | . |
| .                  | .                  | .                  | . | .                  | .      | . |
| Vv09g0316          | Tc06_g007300       | Gorai.006G096700.1 | . | .                  | .      | . |
| .                  | Vv11g0312          | .                  | . | Gorai.             | .      | . |
| 001G025700.1       | Gorai.009G048100.1 | .                  | . | .                  | .      | . |
| .                  | .                  | .                  | . | .                  | .      | . |
| Vv09g0317          | Tc06_g007320       | Gorai.006G096800.1 | . | .                  | .      | . |
| Gorai.011G070700.1 | Vv11g0314          | .                  | . | .                  | .      | . |
| Tc09_g008850       | Gorai.010G077400.1 | .                  | . | .                  | .      | . |
| .                  | .                  | .                  | . | .                  | .      | . |
| Vv09g0318          | Tc06_g007330       | Gorai.010G231100.1 | . | .                  | .      | . |
| Gorai.011G070800.1 | .                  | .                  | . | .                  | .      | . |
| .                  | .                  | .                  | . | .                  | .      | . |
| Vv09g0319          | .                  | .                  | . | .                  | .      | . |
| .                  | .                  | .                  | . | .                  | .      | . |
| .                  | .                  | .                  | . | .                  | .      | . |
| Vv09g0320          | Tc06_g007340       | .                  | . | .                  | .      | . |
| .                  | .                  | .                  | . | .                  | .      | . |
| Vv09g0321          | .                  | .                  | . | .                  | .      | . |
| .                  | .                  | .                  | . | .                  | .      | . |
| Vv09g0322          | .                  | Gorai.010G231000.1 | . | .                  | .      | . |
| .                  | .                  | .                  | . | .                  | .      | . |
| .                  | .                  | .                  | . | .                  | .      | . |
| Vv09g0323          | Tc06_g007350       | Gorai.010G230900.1 | . | .                  | .      | . |

|              |                    |                    |                    |   |        |   |
|--------------|--------------------|--------------------|--------------------|---|--------|---|
| .            | .                  | .                  | .                  | . | .      | . |
| Vv09g0324    | Tc06_g007360       | .                  | Gorai.010G230700.1 | . | .      | . |
| .            | .                  | .                  | .                  | . | .      | . |
| Vv09g0325    | Tc06_g007380       | .                  | Gorai.010G230600.1 | . | .      | . |
| .            | .                  | .                  | .                  | . | .      | . |
| Vv09g0326    | .                  | .                  | .                  | . | .      | . |
| .            | .                  | .                  | .                  | . | .      | . |
| Vv09g0327    | .                  | .                  | .                  | . | .      | . |
| .            | .                  | .                  | .                  | . | .      | . |
| Vv09g0328    | Tc06_g007390       | Gorai.006G096900.1 | .                  | . | .      | . |
|              | Gorai.011G071100.1 | .                  | Vv11g0326          | . | .      | . |
| Tc09_g008970 | .                  | .                  | Gorai.009G048500.1 | . | .      | . |
| .            | .                  | .                  | .                  | . | .      | . |
| Vv09g0329    | Tc06_g007400       | .                  | .                  | . | Gorai. | . |
| 011G071200.1 | .                  | .                  | .                  | . | .      | . |
| .            | .                  | .                  | .                  | . | .      | . |
| Vv09g0330    | .                  | .                  | .                  | . | .      | . |
| .            | .                  | .                  | .                  | . | .      | . |
| Vv09g0331    | .                  | .                  | .                  | . | .      | . |
| .            | .                  | .                  | .                  | . | .      | . |
| Vv09g0332    | .                  | .                  | .                  | . | .      | . |
| .            | .                  | .                  | .                  | . | .      | . |
| Vv09g0333    | .                  | .                  | .                  | . | .      | . |
| .            | .                  | .                  | .                  | . | .      | . |
| Vv09g0334    | .                  | .                  | .                  | . | .      | . |
| .            | .                  | .                  | .                  | . | .      | . |
| Vv09g0335    | .                  | .                  | .                  | . | .      | . |
| .            | .                  | .                  | .                  | . | .      | . |
| Vv09g0336    | Tc06_g007440       | .                  | .                  | . | Gorai. | . |
| 011G071300.1 | .                  | Vv11g0327          | Tc09_g009000       | . | .      | . |
| .            | .                  | Gorai.010G076700.1 | .                  | . | .      | . |
| .            | .                  | .                  | .                  | . | .      | . |
| Vv09g0337    | .                  | .                  | .                  | . | .      | . |
| .            | .                  | .                  | .                  | . | .      | . |
| Vv09g0338    | .                  | .                  | .                  | . | .      | . |
| .            | .                  | .                  | .                  | . | .      | . |
| Vv09g0339    | Tc06_g007460       | .                  | .                  | . | Gorai. | . |

|                    |                    |                    |                    |                    |   |
|--------------------|--------------------|--------------------|--------------------|--------------------|---|
| 011G071400.1       | .                  | Vv11g0329          | Tc09_g009030       | .                  | . |
| Gorai.001G026200.1 | .                  | .                  | Gorai.009G048600.1 | .                  | . |
| Vv09g0340          | .                  | .                  | .                  | .                  | . |
| .                  | .                  | .                  | .                  | .                  | . |
| Vv09g0341          | Tc06_g007490       | .                  | .                  | Gorai.009G128700.1 | . |
| .                  | .                  | .                  | .                  | .                  | . |
| Vv09g0342          | Tc06_g007500       | .                  | .                  | Gorai.009G128800.1 | . |
| Gorai.011G071500.1 | .                  | .                  | .                  | .                  | . |
| .                  | .                  | .                  | .                  | .                  | . |
| Vv09g0343          | .                  | .                  | .                  | .                  | . |
| .                  | .                  | .                  | .                  | .                  | . |
| Vv09g0344          | .                  | .                  | .                  | .                  | . |
| .                  | .                  | .                  | .                  | .                  | . |
| Vv09g0345          | Tc06_g007560       | .                  | .                  | Gorai.             | . |
| 011G071700.1       | .                  | .                  | .                  | .                  | . |
| .                  | .                  | .                  | .                  | .                  | . |
| Vv09g0346          | Tc06_g007600       | .                  | .                  | Gorai.             | . |
| 011G071900.1       | .                  | .                  | .                  | .                  | . |
| .                  | .                  | .                  | .                  | .                  | . |
| Vv09g0347          | Tc06_g007610       | .                  | .                  | Gorai.             | . |
| 011G072000.1       | .                  | .                  | .                  | .                  | . |
| .                  | .                  | .                  | .                  | .                  | . |
| Vv09g0348          | Tc06_g007620       | .                  | .                  | Gorai.             | . |
| 011G072100.1       | .                  | .                  | .                  | .                  | . |
| .                  | .                  | .                  | .                  | .                  | . |
| Vv09g0349          | .                  | .                  | .                  | .                  | . |
| .                  | .                  | .                  | .                  | .                  | . |
| .                  | .                  | .                  | .                  | .                  | . |
| Vv09g0350          | .                  | .                  | .                  | Gorai.011G072300.1 | . |
| .                  | .                  | .                  | .                  | .                  | . |
| Vv04g0324          | .                  | .                  | .                  | Gorai.             | . |
| 003G062800.1       | Gorai.011G072300.1 | .                  | .                  | .                  | . |
| Vv09g0351          | Tc06_g007700       | .                  | .                  | .                  | . |
| .                  | .                  | .                  | .                  | .                  | . |
| .                  | .                  | .                  | .                  | .                  | . |
| Vv09g0352          | Tc06_g007710       | .                  | .                  | .                  | . |
| .                  | .                  | .                  | .                  | .                  | . |
| Vv04g0328          | Tc01_g036690       | .                  | Gorai.001G026800.1 | .                  | . |
| .                  | Gorai.010G105900.1 | .                  | .                  | .                  | . |
| Vv09g0353          | Tc06_g007740       | .                  | Gorai.010G230500.1 | .                  | . |
| Gorai.011G072500.1 | .                  | .                  | .                  | .                  | . |
| .                  | .                  | Vv04g0330          | Tc01_g015300       | .                  | . |
| .                  | Gorai.004G288400.1 | Gorai.009G049300.1 | .                  | .                  | . |
| Gorai.011G072500.1 | .                  | .                  | .                  | .                  | . |

|              |              |                    |   |   |        |
|--------------|--------------|--------------------|---|---|--------|
| Vv09g0354    | Tc06_g007780 | .                  | . | . | Gorai. |
| 011G072600.1 | .            | .                  | . | . | .      |
| .            | .            | .                  | . | . | .      |
| Vv09g0355    | .            | .                  | . | . | .      |
| .            | .            | .                  | . | . | .      |
| .            | .            | .                  | . | . | .      |
| Vv09g0356    | Tc06_g007790 | .                  | . | . | .      |
| .            | .            | .                  | . | . | .      |
| .            | .            | .                  | . | . | .      |
| Vv09g0357    | Tc06_g002920 | .                  | . | . | .      |
| .            | .            | .                  | . | . | .      |
| .            | .            | .                  | . | . | .      |
| Vv09g0358    | Tc06_g002900 | .                  | . | . | .      |
| .            | .            | .                  | . | . | .      |
| .            | .            | .                  | . | . | .      |
| Vv09g0359    | Tc06_g002880 | .                  | . | . | .      |
| .            | .            | .                  | . | . | .      |
| .            | .            | .                  | . | . | .      |
| Vv09g0360    | Tc06_g002830 | .                  | . | . | .      |
| .            | .            | .                  | . | . | .      |
| .            | .            | .                  | . | . | .      |
| Vv09g0361    | Tc06_g002820 | .                  | . | . | .      |
| .            | .            | .                  | . | . | .      |
| .            | .            | .                  | . | . | .      |
| Vv09g0362    | Tc06_g007800 | .                  | . | . | .      |
| .            | .            | .                  | . | . | .      |
| .            | .            | .                  | . | . | .      |
| Vv09g0363    | Tc06_g007820 | .                  | . | . | .      |
| .            | .            | .                  | . | . | .      |
| .            | .            | .                  | . | . | .      |
| Vv09g0364    | Tc06_g007830 | .                  | . | . | .      |
| .            | .            | .                  | . | . | .      |
| .            | .            | .                  | . | . | .      |
| Vv09g0365    | Tc06_g007840 | .                  | . | . | .      |
| .            | .            | .                  | . | . | .      |
| .            | .            | .                  | . | . | .      |
| Vv09g0366    | Tc06_g007860 | Gorai.006G097000.1 | . | . | .      |
| .            | .            | .                  | . | . | .      |
| .            | .            | .                  | . | . | .      |
| Vv09g0367    | Tc06_g007910 | .                  | . | . | .      |
| .            | .            | .                  | . | . | .      |
| .            | .            | .                  | . | . | .      |
| Vv09g0368    | Tc06_g007920 | .                  | . | . | .      |
| .            | .            | .                  | . | . | .      |
| .            | .            | .                  | . | . | .      |
| Vv09g0369    | Tc06_g007930 | .                  | . | . | .      |
| .            | .            | .                  | . | . | .      |
| .            | .            | .                  | . | . | .      |
| Vv09g0370    | .            | .                  | . | . | .      |
| .            | .            | .                  | . | . | .      |

|                    |                    |                    |                    |        |
|--------------------|--------------------|--------------------|--------------------|--------|
| Vv09g0371          | Tc06_g007940       | .                  | Gorai.010G229800.1 | .      |
| .                  | .                  | .                  | .                  | .      |
| Vv09g0372          | Tc06_g007970       | .                  | .                  | Gorai. |
| 011G072800.1       | .                  | .                  | .                  | .      |
| Vv09g0373          | Tc06_g007980       | .                  | .                  | Gorai. |
| 011G072900.1       | .                  | .                  | .                  | .      |
| Vv09g0374          | Tc06_g007990       | .                  | .                  | .      |
| .                  | .                  | .                  | .                  | .      |
| Vv04g0357          | Tc01_g001220       | .                  | .                  | Gorai. |
| 003G064000.1       | Gorai.010G107900.1 | .                  | .                  | .      |
| Vv09g0375          | .                  | .                  | .                  | .      |
| .                  | .                  | .                  | .                  | .      |
| Vv09g0376          | Tc06_g008000       | Gorai.006G097100.1 | .                  | .      |
| .                  | .                  | .                  | .                  | .      |
| Vv09g0377          | Tc06_g008010       | .                  | .                  | .      |
| .                  | .                  | .                  | .                  | .      |
| Vv09g0378          | Tc06_g008020       | .                  | .                  | Gorai. |
| 011G073000.1       | .                  | .                  | .                  | .      |
| Vv09g0379          | Tc06_g008030       | .                  | .                  | .      |
| Vv11g0364          | Tc09_g009400       | .                  | .                  | .      |
| Gorai.009G026700.1 | .                  | .                  | .                  | .      |
| Vv09g0380          | .                  | .                  | .                  | .      |
| .                  | .                  | .                  | .                  | .      |
| Vv09g0381          | Tc06_g008060       | .                  | .                  | Gorai. |
| 011G073200.1       | .                  | .                  | .                  | .      |
| Vv09g0382          | Tc06_g008070       | .                  | Gorai.010G229600.1 | .      |
| Gorai.011G073300.1 | .                  | .                  | .                  | .      |
| .                  | .                  | .                  | .                  | .      |
| Vv09g0383          | Tc06_g008080       | .                  | .                  | Gorai. |
| 011G020100.1       | .                  | .                  | .                  | .      |
| Vv09g0384          | .                  | .                  | .                  | .      |
| .                  | .                  | .                  | .                  | .      |
| Vv09g0385          | Tc06_g008150       | .                  | .                  | .      |
| Vv11g0370          | .                  | .                  | .                  | .      |
| Vv04g0363          | .                  | .                  | .                  | .      |
| Vv09g0386          | .                  | .                  | .                  | .      |

|              |                    |                    |   |   |                    |                    |   |
|--------------|--------------------|--------------------|---|---|--------------------|--------------------|---|
| .            | .                  | .                  | . | . | .                  | .                  | . |
| .            | .                  | .                  | . | . | .                  | .                  | . |
| Vv09g0387    | .                  | .                  | . | . | .                  | .                  | . |
| .            | .                  | .                  | . | . | .                  | .                  | . |
| Vv09g0388    | Tc06_g008160       | Gorai.006G097200.1 | . | . | .                  | .                  | . |
|              | Gorai.011G073500.1 | .                  | . | . | .                  | .                  | . |
| .            | .                  | .                  | . | . | .                  | .                  | . |
| Vv09g0389    | Tc06_g008180       | Gorai.006G097300.1 | . | . | .                  | .                  | . |
|              | Gorai.011G073600.1 | .                  | . | . | .                  | .                  | . |
| .            | .                  | .                  | . | . | .                  | .                  | . |
| Vv09g0390    | Tc06_g008190       | .                  | . | . | .                  | Gorai.             | . |
| 011G073700.1 | .                  | .                  | . | . | .                  | .                  | . |
| .            | .                  | .                  | . | . | .                  | .                  | . |
| Vv09g0391    | .                  | .                  | . | . | .                  | .                  | . |
| .            | .                  | .                  | . | . | .                  | Vv04g0370          | . |
| .            | .                  | Gorai.001G027600.1 | . | . | .                  | .                  | . |
| Vv09g0392    | Tc06_g008200       | .                  | . | . | .                  | Gorai.             | . |
| 011G073900.1 | .                  | .                  | . | . | .                  | .                  | . |
| .            | .                  | .                  | . | . | .                  | .                  | . |
| Vv09g0393    | .                  | .                  | . | . | .                  | .                  | . |
| .            | .                  | .                  | . | . | .                  | .                  | . |
| Vv09g0394    | .                  | .                  | . | . | .                  | .                  | . |
| .            | .                  | .                  | . | . | .                  | .                  | . |
| Vv09g0395    | .                  | .                  | . | . | .                  | .                  | . |
| .            | .                  | .                  | . | . | .                  | .                  | . |
| Vv09g0396    | .                  | .                  | . | . | .                  | .                  | . |
| .            | .                  | .                  | . | . | .                  | .                  | . |
| Vv09g0397    | .                  | .                  | . | . | .                  | .                  | . |
| .            | .                  | .                  | . | . | .                  | .                  | . |
| Vv09g0398    | .                  | .                  | . | . | .                  | Gorai.011G018500.1 | . |
| .            | .                  | .                  | . | . | .                  | .                  | . |
|              | Vv04g0386          | .                  | . | . | Gorai.001G028700.1 | .                  | . |
|              | Gorai.009G051700.1 | .                  | . | . | .                  | .                  | . |
| Vv09g0399    | .                  | .                  | . | . | .                  | .                  | . |
| .            | .                  | .                  | . | . | .                  | .                  | . |
| .            | .                  | .                  | . | . | .                  | .                  | . |
| Vv09g0400    | .                  | .                  | . | . | .                  | .                  | . |
| Vv11g0389    | Tc09_g009630       | .                  | . | . | .                  | Gorai.             | . |
| 009G025600.1 | .                  | .                  | . | . | .                  | .                  | . |
| .            | .                  | .                  | . | . | .                  | .                  | . |
| Vv09g0401    | .                  | .                  | . | . | .                  | .                  | . |
| .            | .                  | .                  | . | . | .                  | .                  | . |

|                    |              |                    |   |                    |                    |   |   |
|--------------------|--------------|--------------------|---|--------------------|--------------------|---|---|
| Vv09g0402          | .            | .                  | . | .                  | .                  | . | . |
| .                  | .            | .                  | . | .                  | .                  | . | . |
| Vv09g0403          | Tc06_g008410 | .                  | . | .                  | .                  | . | . |
| .                  | .            | .                  | . | .                  | .                  | . | . |
| Vv09g0404          | .            | .                  | . | .                  | .                  | . | . |
| .                  | .            | .                  | . | .                  | .                  | . | . |
| Vv09g0405          | Tc06_g008420 | Gorai.006G097500.1 | . | .                  | .                  | . | . |
| .                  | .            | .                  | . | .                  | .                  | . | . |
| Vv09g0406          | .            | .                  | . | .                  | .                  | . | . |
| .                  | .            | .                  | . | .                  | .                  | . | . |
| Vv09g0407          | .            | .                  | . | .                  | .                  | . | . |
| .                  | .            | .                  | . | .                  | .                  | . | . |
| Vv09g0408          | .            | .                  | . | .                  | Gorai.011G074400.1 | . | . |
| .                  | .            | .                  | . | .                  | .                  | . | . |
| Vv09g0409          | .            | .                  | . | .                  | Gorai.011G016200.1 | . | . |
| .                  | .            | .                  | . | .                  | .                  | . | . |
| Vv09g0410          | .            | .                  | . | .                  | .                  | . | . |
| .                  | .            | .                  | . | .                  | .                  | . | . |
| Vv09g0411          | .            | .                  | . | .                  | .                  | . | . |
| .                  | .            | .                  | . | .                  | .                  | . | . |
| Vv09g0412          | .            | .                  | . | .                  | .                  | . | . |
| .                  | .            | .                  | . | .                  | .                  | . | . |
| Vv09g0413          | .            | .                  | . | .                  | .                  | . | . |
| .                  | .            | .                  | . | .                  | .                  | . | . |
| Vv09g0414          | .            | .                  | . | .                  | .                  | . | . |
| .                  | .            | .                  | . | .                  | .                  | . | . |
| Vv09g0415          | .            | .                  | . | .                  | Gorai.011G074800.1 | . | . |
| .                  | .            | .                  | . | .                  | .                  | . | . |
| Vv09g0416          | .            | .                  | . | .                  | Gorai.011G074900.1 | . | . |
| .                  | .            | .                  | . | .                  | .                  | . | . |
| Vv04g0394          | .            | .                  | . | Gorai.001G028800.1 | .                  | . | . |
| Gorai.009G051900.1 | .            | .                  | . | Gorai.011G074900.1 | .                  | . | . |
| Vv09g0417          | Tc06_g008520 | Gorai.010G228200.1 | . | .                  | .                  | . | . |
| Gorai.011G075000.1 | .            | .                  | . | .                  | .                  | . | . |
| .                  | .            | .                  | . | .                  | .                  | . | . |



|              |                    |                    |   |                    |        |   |
|--------------|--------------------|--------------------|---|--------------------|--------|---|
| Vv09g0418    | Tc06_g008540       | .                  | . | .                  | .      | . |
| .            | .                  | .                  | . | .                  | .      | . |
| Vv09g0419    | .                  | .                  | . | .                  | .      | . |
| Vv11g0406    | Tc09_g009850       | .                  | . | Gorai.004G280000.1 | .      | . |
|              | Gorai.009G024600.1 | .                  | . | .                  | .      | . |
| Vv09g0420    | Tc06_g008550       | .                  | . | .                  | Gorai. | . |
| 011G075200.1 | Vv11g0407          | .                  | . | .                  | .      | . |
| .            | .                  | .                  | . | .                  | .      | . |
| Vv09g0421    | Tc06_g008570       | .                  | . | .                  | Gorai. | . |
| 011G075300.1 | .                  | .                  | . | .                  | .      | . |
| .            | .                  | .                  | . | .                  | .      | . |
| Vv09g0422    | Tc06_g008580       | Gorai.006G098000.1 | . | .                  | .      | . |
|              | Gorai.011G075400.1 | .                  | . | .                  | .      | . |
| .            | .                  | .                  | . | .                  | .      | . |
| Vv09g0423    | Tc06_g008590       | .                  | . | .                  | .      | . |
|              | Vv11g0409          | Tc09_g009870       | . | .                  | Gorai. | . |
| 004G279900.1 | Gorai.009G024400.1 | Gorai.010G070700.1 | . | .                  | .      | . |
| .            | .                  | .                  | . | .                  | .      | . |
| Vv09g0424    | Tc06_g008600       | Gorai.006G098200.1 | . | .                  | .      | . |
| .            | .                  | .                  | . | .                  | .      | . |
| Vv09g0425    | .                  | .                  | . | .                  | .      | . |
| .            | .                  | .                  | . | .                  | .      | . |
| Vv09g0426    | .                  | .                  | . | .                  | .      | . |
| .            | .                  | .                  | . | .                  | .      | . |
| Vv09g0427    | .                  | .                  | . | .                  | .      | . |
| .            | .                  | .                  | . | .                  | .      | . |
| Vv09g0428    | .                  | Gorai.010G225300.1 | . | .                  | .      | . |
| .            | .                  | .                  | . | .                  | .      | . |
| Vv09g0429    | Tc06_g008620       | .                  | . | .                  | .      | . |
| .            | .                  | .                  | . | .                  | .      | . |
| Vv09g0430    | .                  | .                  | . | .                  | .      | . |
| .            | .                  | .                  | . | .                  | .      | . |
| Vv09g0431    | .                  | .                  | . | .                  | .      | . |
| .            | .                  | .                  | . | .                  | .      | . |
| Vv09g0432    | .                  | .                  | . | .                  | .      | . |
| .            | .                  | .                  | . | .                  | .      | . |
| .            | .                  | .                  | . | .                  | .      | . |

|                    |                    |   |                    |   |                    |           |   |
|--------------------|--------------------|---|--------------------|---|--------------------|-----------|---|
| Vv09g0433          | .                  | . | .                  | . | .                  | .         | . |
| .                  | .                  | . | .                  | . | .                  | .         | . |
| Vv09g0434          | Tc06_g008650       |   | Gorai.006G098400.1 | . | .                  | .         | . |
| .                  | .                  | . | .                  | . | .                  | .         | . |
| Vv09g0435          | .                  | . | .                  | . | .                  | .         | . |
| Vv11g0412          | Tc09_g009900       |   | Gorai.001G005200.1 | . | .                  | .         | . |
| .                  | Gorai.010G070400.1 | . | .                  | . | .                  | .         | . |
| .                  | .                  | . | .                  | . | .                  | .         | . |
| Vv09g0436          | .                  | . | .                  | . | .                  | .         | . |
| .                  | .                  | . | .                  | . | .                  | .         | . |
| Vv09g0437          | Tc06_g008660       | . | .                  | . | .                  | .         | . |
| .                  | .                  | . | .                  | . | .                  | .         | . |
| Vv04g0432          | .                  | . | .                  | . | Gorai.009G052500.1 | .         | . |
| .                  | .                  | . | .                  | . | .                  | .         | . |
| Vv09g0438          | Tc06_g008670       | . | .                  | . | .                  | .         | . |
| .                  | .                  | . | .                  | . | .                  | .         | . |
| .                  | .                  | . | .                  | . | .                  | .         | . |
| Vv09g0439          | Tc06_g008690       | . | .                  | . | .                  | .         | . |
| Vv11g0415          | Tc09_g009940       | . | Gorai.001G004800.1 | . | .                  | .         | . |
| .                  | Gorai.010G069900.1 | . | .                  | . | .                  | .         | . |
| .                  | .                  | . | .                  | . | .                  | .         | . |
| Vv09g0440          | .                  | . | .                  | . | .                  | .         | . |
| .                  | .                  | . | .                  | . | .                  | .         | . |
| Vv09g0441          | .                  | . | .                  | . | .                  | .         | . |
| .                  | .                  | . | .                  | . | .                  | .         | . |
| Vv09g0442          | .                  | . | .                  | . | .                  | .         | . |
| .                  | .                  | . | .                  | . | .                  | .         | . |
| Vv09g0443          | .                  | . | .                  | . | .                  | .         | . |
| .                  | .                  | . | .                  | . | .                  | .         | . |
| Vv09g0444          | .                  | . | .                  | . | Gorai.011G012700.1 | .         | . |
| .                  | .                  | . | .                  | . | .                  | .         | . |
| Vv09g0445          | .                  | . | .                  | . | .                  | .         | . |
| .                  | .                  | . | .                  | . | .                  | Vv04g0458 | . |
| .                  | .                  | . | .                  | . | .                  | .         | . |
| Vv09g0446          | .                  | . | .                  | . | .                  | .         | . |
| .                  | .                  | . | .                  | . | .                  | .         | . |
| Vv09g0447          | Tc06_g010430       | . | .                  | . | Gorai.             | .         | . |
| 011G076900.1       | Vv11g0423          | . | Tc09_g010070       | . | .                  | .         | . |
| Gorai.001G004200.1 | .                  | . | .                  | . | .                  | .         | . |
| .                  | .                  | . | .                  | . | .                  | .         | . |
| Vv09g0448          | .                  | . | .                  | . | Gorai.011G077200.1 | .         | . |

|              |                    |           |                    |              |                    |   |   |
|--------------|--------------------|-----------|--------------------|--------------|--------------------|---|---|
| .            | .                  | .         | .                  | .            | .                  | . | . |
| .            | .                  | .         | .                  | .            | .                  | . | . |
| Vv09g0449    | .                  | .         | .                  | .            | .                  | . | . |
| .            | .                  | .         | .                  | .            | .                  | . | . |
| Vv09g0450    | .                  | .         | .                  | .            | .                  | . | . |
| .            | .                  | .         | .                  | .            | .                  | . | . |
| Vv09g0451    | .                  | .         | .                  | .            | .                  | . | . |
| .            | .                  | .         | .                  | .            | .                  | . | . |
| Vv09g0452    | .                  | .         | .                  | .            | .                  | . | . |
| .            | .                  | .         | .                  | .            | .                  | . | . |
| Vv09g0453    | .                  | .         | .                  | .            | .                  | . | . |
| .            | .                  | .         | .                  | .            | .                  | . | . |
| Vv09g0454    | .                  | .         | .                  | .            | .                  | . | . |
| Vv11g0426    | .                  | .         | .                  | .            | .                  | . | . |
| .            | .                  | .         | .                  | .            | .                  | . | . |
| Vv09g0455    | .                  | .         | .                  | .            | .                  | . | . |
| .            | .                  | .         | .                  | .            | .                  | . | . |
| Vv09g0456    | .                  | .         | .                  | .            | .                  | . | . |
| .            | .                  | .         | .                  | .            | .                  | . | . |
| Vv09g0457    | .                  | .         | .                  | .            | .                  | . | . |
| .            | .                  | .         | .                  | .            | .                  | . | . |
| Vv09g0458    | .                  | .         | .                  | .            | Gorai.011G077300.1 | . | . |
| .            | .                  | .         | .                  | .            | .                  | . | . |
| Vv09g0459    | .                  | .         | .                  | .            | .                  | . | . |
| .            | .                  | .         | .                  | .            | .                  | . | . |
| Vv09g0460    | .                  | .         | .                  | .            | .                  | . | . |
| .            | .                  | .         | .                  | .            | .                  | . | . |
| Vv09g0461    | Tc06_g000240       | .         | .                  | .            | Gorai.009G115200.1 | . | . |
| .            | .                  | Vv11g0432 | .                  | Tc09_g010120 | .                  | . | . |
| .            | Gorai.004G279500.1 | .         | Gorai.009G012100.1 | .            | Gorai.             | . | . |
| 010G069100.1 | Vv04g0459          | .         | .                  | .            | Gorai.             | . | . |
| 004G279500.1 | .                  | .         | .                  | .            | .                  | . | . |
| Vv09g0462    | .                  | .         | .                  | .            | .                  | . | . |
| Vv11g0433    | Tc09_g010130       | .         | .                  | .            | .                  | . | . |
| .            | .                  | .         | .                  | .            | .                  | . | . |
| Vv09g0463    | .                  | .         | .                  | .            | Gorai.011G077400.1 | . | . |
| .            | .                  | .         | .                  | .            | .                  | . | . |
| .            | .                  | .         | .                  | .            | .                  | . | . |
| Vv09g0464    | .                  | .         | .                  | .            | Gorai.011G077500.1 | . | . |

|           |              |   |   |   |                    |   |   |
|-----------|--------------|---|---|---|--------------------|---|---|
| .         | .            | . | . | . | .                  | . | . |
| .         | .            | . | . | . | .                  | . | . |
| Vv09g0465 | .            | . | . | . | .                  | . | . |
| .         | .            | . | . | . | .                  | . | . |
| Vv09g0466 | .            | . | . | . | .                  | . | . |
| .         | .            | . | . | . | .                  | . | . |
| Vv09g0467 | Tc06_g000590 | . | . | . | .                  | . | . |
| .         | .            | . | . | . | .                  | . | . |
| Vv09g0468 | .            | . | . | . | .                  | . | . |
| .         | .            | . | . | . | .                  | . | . |
| Vv09g0469 | .            | . | . | . | .                  | . | . |
| .         | .            | . | . | . | .                  | . | . |
| Vv09g0470 | Tc06_g000660 | . | . | . | .                  | . | . |
| .         | .            | . | . | . | .                  | . | . |
| Vv09g0471 | .            | . | . | . | Gorai.011G077800.1 | . | . |
| .         | .            | . | . | . | .                  | . | . |
| Vv09g0472 | Tc06_g000670 | . | . | . | .                  | . | . |
| .         | .            | . | . | . | .                  | . | . |
| Vv09g0473 | Tc06_g000690 | . | . | . | .                  | . | . |
| .         | .            | . | . | . | .                  | . | . |
| Vv09g0474 | .            | . | . | . | .                  | . | . |
| .         | .            | . | . | . | .                  | . | . |
| Vv09g0475 | .            | . | . | . | .                  | . | . |
| .         | .            | . | . | . | .                  | . | . |
| Vv09g0476 | Tc06_g000700 | . | . | . | .                  | . | . |
| .         | .            | . | . | . | .                  | . | . |
| Vv09g0477 | .            | . | . | . | .                  | . | . |
| .         | .            | . | . | . | .                  | . | . |
| Vv09g0478 | .            | . | . | . | Gorai.011G078000.1 | . | . |
| .         | .            | . | . | . | .                  | . | . |
| Vv09g0479 | .            | . | . | . | .                  | . | . |
| .         | .            | . | . | . | .                  | . | . |
| Vv09g0480 | .            | . | . | . | .                  | . | . |
| .         | .            | . | . | . | .                  | . | . |
| .         | .            | . | . | . | .                  | . | . |

|              |              |   |   |   |                    |
|--------------|--------------|---|---|---|--------------------|
| Vv09g0481    | .            | . | . | . | Gorai.011G078100.1 |
| .            | .            | . | . | . | .                  |
| Vv09g0482    | .            | . | . | . | .                  |
| .            | .            | . | . | . | .                  |
| Vv09g0483    | .            | . | . | . | Gorai.011G078200.1 |
| .            | .            | . | . | . | .                  |
| Vv09g0484    | Tc06_g010820 | . | . | . | .                  |
| .            | .            | . | . | . | .                  |
| Vv09g0485    | .            | . | . | . | Gorai.011G078300.1 |
| .            | .            | . | . | . | .                  |
| Vv09g0486    | Tc06_g010810 | . | . | . | .                  |
| .            | .            | . | . | . | .                  |
| Vv09g0487    | Tc06_g010810 | . | . | . | .                  |
| .            | .            | . | . | . | .                  |
| Vv09g0488    | Tc06_g010820 | . | . | . | .                  |
| .            | .            | . | . | . | .                  |
| Vv09g0489    | .            | . | . | . | .                  |
| .            | .            | . | . | . | .                  |
| Vv09g0490    | Tc06_g007330 | . | . | . | .                  |
| Vv11g0466    | Tc09_g010370 | . | . | . | Gorai.             |
| 004G279200.1 | .            | . | . | . | .                  |
| .            | .            | . | . | . | .                  |
| Vv09g0491    | .            | . | . | . | .                  |
| .            | .            | . | . | . | .                  |
| Vv09g0492    | .            | . | . | . | .                  |
| .            | .            | . | . | . | .                  |
| Vv09g0493    | .            | . | . | . | .                  |
| .            | .            | . | . | . | .                  |
| Vv09g0494    | .            | . | . | . | .                  |
| .            | .            | . | . | . | .                  |
| Vv09g0495    | .            | . | . | . | .                  |
| .            | .            | . | . | . | .                  |
| Vv09g0496    | .            | . | . | . | .                  |
| .            | .            | . | . | . | .                  |
| Vv09g0497    | .            | . | . | . | .                  |

|              |              |   |   |   |                    |        |   |
|--------------|--------------|---|---|---|--------------------|--------|---|
| .            | .            | . | . | . | .                  | .      | . |
| .            | .            | . | . | . | .                  | .      | . |
| Vv09g0498    | .            | . | . | . | .                  | .      | . |
| .            | .            | . | . | . | .                  | .      | . |
| Vv09g0499    | .            | . | . | . | .                  | .      | . |
| .            | .            | . | . | . | .                  | .      | . |
| Vv09g0500    | .            | . | . | . | .                  | .      | . |
| .            | .            | . | . | . | .                  | .      | . |
| Vv09g0501    | .            | . | . | . | Gorai.011G078400.1 | .      | . |
| .            | .            | . | . | . | .                  | .      | . |
| Vv09g0502    | .            | . | . | . | .                  | .      | . |
| .            | .            | . | . | . | .                  | .      | . |
| Vv09g0503    | Tc06_g010760 | . | . | . | .                  | .      | . |
| .            | .            | . | . | . | .                  | .      | . |
| Vv09g0504    | Tc06_g010870 | . | . | . | .                  | .      | . |
| .            | .            | . | . | . | .                  | .      | . |
| Vv09g0505    | .            | . | . | . | .                  | .      | . |
| .            | .            | . | . | . | .                  | .      | . |
| Vv09g0506    | .            | . | . | . | .                  | .      | . |
| .            | .            | . | . | . | .                  | .      | . |
| Vv09g0507    | Tc06_g007220 | . | . | . | .                  | Gorai. | . |
| 011G078700.1 | .            | . | . | . | .                  | .      | . |
| .            | .            | . | . | . | .                  | .      | . |
| Vv09g0508    | Tc06_g007210 | . | . | . | .                  | .      | . |
| .            | .            | . | . | . | .                  | .      | . |
| Vv09g0509    | Tc06_g013430 | . | . | . | .                  | .      | . |
| .            | .            | . | . | . | .                  | .      | . |
| Vv09g0510    | .            | . | . | . | Gorai.011G078800.1 | .      | . |
| .            | .            | . | . | . | .                  | .      | . |
| Vv09g0511    | Tc06_g013400 | . | . | . | .                  | .      | . |
| .            | .            | . | . | . | .                  | .      | . |
| Vv09g0512    | Tc06_g013390 | . | . | . | .                  | Gorai. | . |
| 011G079000.1 | .            | . | . | . | .                  | .      | . |
| .            | .            | . | . | . | .                  | .      | . |
| Vv09g0513    | Tc06_g006940 | . | . | . | .                  | Gorai. | . |
| 011G079100.1 | .            | . | . | . | .                  | .      | . |
| .            | .            | . | . | . | .                  | .      | . |

|           |   |   |   |   |   |   |   |
|-----------|---|---|---|---|---|---|---|
| Vv09g0514 | . | . | . | . | . | . | . |
| .         | . | . | . | . | . | . | . |
| Vv09g0515 | . | . | . | . | . | . | . |
| .         | . | . | . | . | . | . | . |
| Vv09g0516 | . | . | . | . | . | . | . |
| .         | . | . | . | . | . | . | . |
| Vv09g0517 | . | . | . | . | . | . | . |
| .         | . | . | . | . | . | . | . |
| Vv09g0518 | . | . | . | . | . | . | . |
| .         | . | . | . | . | . | . | . |
| Vv09g0519 | . | . | . | . | . | . | . |
| .         | . | . | . | . | . | . | . |
| Vv09g0520 | . | . | . | . | . | . | . |
| .         | . | . | . | . | . | . | . |
| Vv09g0521 | . | . | . | . | . | . | . |
| .         | . | . | . | . | . | . | . |
| Vv09g0522 | . | . | . | . | . | . | . |
| .         | . | . | . | . | . | . | . |
| Vv09g0523 | . | . | . | . | . | . | . |
| .         | . | . | . | . | . | . | . |
| Vv09g0524 | . | . | . | . | . | . | . |
| .         | . | . | . | . | . | . | . |
| Vv09g0525 | . | . | . | . | . | . | . |
| .         | . | . | . | . | . | . | . |
| Vv09g0526 | . | . | . | . | . | . | . |
| .         | . | . | . | . | . | . | . |
| Vv09g0527 | . | . | . | . | . | . | . |
| .         | . | . | . | . | . | . | . |
| Vv09g0528 | . | . | . | . | . | . | . |
| .         | . | . | . | . | . | . | . |
| Vv09g0529 | . | . | . | . | . | . | . |
| .         | . | . | . | . | . | . | . |
| Vv09g0530 | . | . | . | . | . | . | . |
| .         | . | . | . | . | . | . | . |

|           |              |   |   |   |   |   |   |
|-----------|--------------|---|---|---|---|---|---|
| Vv09g0531 | .            | . | . | . | . | . | . |
| .         | .            | . | . | . | . | . | . |
| Vv09g0532 | .            | . | . | . | . | . | . |
| .         | .            | . | . | . | . | . | . |
| Vv09g0533 | .            | . | . | . | . | . | . |
| .         | .            | . | . | . | . | . | . |
| Vv09g0534 | .            | . | . | . | . | . | . |
| .         | .            | . | . | . | . | . | . |
| Vv09g0535 | .            | . | . | . | . | . | . |
| .         | .            | . | . | . | . | . | . |
| Vv09g0536 | .            | . | . | . | . | . | . |
| .         | .            | . | . | . | . | . | . |
| Vv09g0537 | .            | . | . | . | . | . | . |
| .         | .            | . | . | . | . | . | . |
| Vv09g0538 | .            | . | . | . | . | . | . |
| .         | .            | . | . | . | . | . | . |
| Vv09g0539 | .            | . | . | . | . | . | . |
| .         | .            | . | . | . | . | . | . |
| Vv09g0540 | .            | . | . | . | . | . | . |
| .         | .            | . | . | . | . | . | . |
| Vv09g0541 | .            | . | . | . | . | . | . |
| .         | .            | . | . | . | . | . | . |
| Vv09g0542 | .            | . | . | . | . | . | . |
| .         | .            | . | . | . | . | . | . |
| Vv09g0543 | Tc06_g013380 | . | . | . | . | . | . |
| .         | .            | . | . | . | . | . | . |
| Vv09g0544 | .            | . | . | . | . | . | . |
| .         | .            | . | . | . | . | . | . |
| Vv09g0545 | .            | . | . | . | . | . | . |
| .         | .            | . | . | . | . | . | . |
| Vv09g0546 | .            | . | . | . | . | . | . |
| .         | .            | . | . | . | . | . | . |
| Vv09g0547 | .            | . | . | . | . | . | . |



|                    |                    |                    |   |   |                    |   |   |
|--------------------|--------------------|--------------------|---|---|--------------------|---|---|
| .                  | .                  | .                  | . | . | .                  | . | . |
| .                  | .                  | .                  | . | . | .                  | . | . |
| Vv09g0548          | .                  | .                  | . | . | .                  | . | . |
| .                  | .                  | .                  | . | . | .                  | . | . |
| Vv09g0549          | .                  | .                  | . | . | .                  | . | . |
| .                  | .                  | .                  | . | . | .                  | . | . |
| Vv09g0550          | .                  | .                  | . | . | Gorai.011G079300.1 | . | . |
| .                  | .                  | .                  | . | . | .                  | . | . |
| Vv09g0551          | .                  | .                  | . | . | .                  | . | . |
| .                  | .                  | .                  | . | . | .                  | . | . |
| Vv09g0552          | .                  | .                  | . | . | Gorai.011G079400.1 | . | . |
| .                  | Vv04g0461          | .                  | . | . | .                  | . | . |
| Vv09g0553          | Tc06_g006890       | .                  | . | . | .                  | . | . |
| .                  | .                  | .                  | . | . | .                  | . | . |
| Vv09g0554          | .                  | .                  | . | . | .                  | . | . |
| .                  | .                  | .                  | . | . | .                  | . | . |
| Vv09g0555          | Tc06_g006880       | Gorai.006G094600.1 | . | . | .                  | . | . |
| .                  | .                  | .                  | . | . | .                  | . | . |
| Vv09g0556          | Tc06_g006850       | .                  | . | . | Gorai.             | . | . |
| 011G079500.1       | .                  | .                  | . | . | .                  | . | . |
| .                  | .                  | .                  | . | . | .                  | . | . |
| Vv09g0557          | Tc06_g006840       | Gorai.010G227600.1 | . | . | .                  | . | . |
| Gorai.009G129100.1 | Gorai.011G079600.1 | .                  | . | . | .                  | . | . |
| .                  | .                  | .                  | . | . | .                  | . | . |
| Vv09g0558          | .                  | .                  | . | . | .                  | . | . |
| .                  | .                  | .                  | . | . | .                  | . | . |
| Vv09g0559          | .                  | .                  | . | . | .                  | . | . |
| Vv04g0487          | .                  | .                  | . | . | .                  | . | . |
| .                  | .                  | .                  | . | . | .                  | . | . |
| Vv09g0560          | Tc06_g006820       | .                  | . | . | .                  | . | . |
| .                  | .                  | .                  | . | . | .                  | . | . |
| Vv09g0561          | Tc06_g006810       | .                  | . | . | Gorai.009G129200.1 | . | . |
| Gorai.011G079700.1 | .                  | .                  | . | . | .                  | . | . |
| .                  | .                  | .                  | . | . | .                  | . | . |
| Vv09g0562          | Tc06_g006800       | .                  | . | . | Gorai.009G129300.1 | . | . |
| .                  | .                  | .                  | . | . | .                  | . | . |
| Vv09g0563          | Tc06_g006790       | .                  | . | . | Gorai.009G129400.1 | . | . |

|                    |                    |   |                    |                    |   |        |   |
|--------------------|--------------------|---|--------------------|--------------------|---|--------|---|
| .                  | .                  | . | .                  | .                  | . | .      | . |
| .                  | .                  | . | .                  | .                  | . | .      | . |
| Vv09g0564          | Tc06_g006730       | . | .                  | .                  | . | Gorai. | . |
| 011G079800.1       | .                  | . | .                  | .                  | . | .      | . |
| .                  | .                  | . | .                  | .                  | . | .      | . |
| Vv09g0565          | .                  | . | .                  | .                  | . | .      | . |
| .                  | .                  | . | .                  | .                  | . | .      | . |
| Vv09g0566          | .                  | . | .                  | .                  | . | .      | . |
| .                  | .                  | . | .                  | .                  | . | .      | . |
| Vv09g0567          | Tc06_g006590       | . | .                  | Gorai.010G227500.1 | . | .      | . |
| .                  | Vv11g0493          | . | .                  | Tc09_g010730       | . | .      | . |
| .                  | Gorai.009G010600.1 | . | .                  | Vv04g0512          | . | .      | . |
| .                  | Gorai.004G274500.1 | . | .                  | .                  | . | .      | . |
| Vv09g0568          | .                  | . | .                  | .                  | . | .      | . |
| .                  | .                  | . | .                  | .                  | . | .      | . |
| Vv09g0569          | .                  | . | .                  | .                  | . | .      | . |
| .                  | .                  | . | .                  | .                  | . | .      | . |
| Vv09g0570          | .                  | . | .                  | .                  | . | .      | . |
| .                  | .                  | . | .                  | .                  | . | .      | . |
| Vv09g0571          | .                  | . | .                  | .                  | . | .      | . |
| .                  | .                  | . | .                  | .                  | . | .      | . |
| Vv09g0572          | .                  | . | .                  | .                  | . | .      | . |
| .                  | .                  | . | .                  | .                  | . | .      | . |
| Vv09g0573          | .                  | . | .                  | .                  | . | .      | . |
| .                  | .                  | . | .                  | .                  | . | .      | . |
| Vv09g0574          | .                  | . | Gorai.010G227400.1 | .                  | . | .      | . |
| Gorai.011G080100.1 | .                  | . | .                  | .                  | . | .      | . |
| .                  | Vv04g0515          | . | Tc09_g017500       | .                  | . | .      | . |
| .                  | Gorai.011G080200.1 | . | .                  | .                  | . | .      | . |
| Vv09g0575          | .                  | . | .                  | .                  | . | .      | . |
| .                  | .                  | . | .                  | .                  | . | .      | . |
| Vv09g0576          | .                  | . | .                  | .                  | . | .      | . |
| .                  | .                  | . | .                  | .                  | . | .      | . |
| Vv09g0577          | .                  | . | .                  | .                  | . | .      | . |
| .                  | .                  | . | .                  | .                  | . | .      | . |
| Vv09g0578          | .                  | . | .                  | .                  | . | .      | . |
| .                  | .                  | . | .                  | .                  | . | .      | . |
| Vv09g0579          | .                  | . | .                  | .                  | . | .      | . |

|                    |                    |                    |                    |                    |        |           |   |
|--------------------|--------------------|--------------------|--------------------|--------------------|--------|-----------|---|
| .                  | .                  | .                  | .                  | .                  | .      | .         | . |
| .                  | .                  | .                  | .                  | .                  | .      | .         | . |
| Vv09g0580          | .                  | .                  | Gorai.010G227300.1 | .                  | Gorai. | .         | . |
| 009G129600.1       | Gorai.011G080500.1 | .                  | .                  | .                  | .      | .         | . |
| .                  | .                  | .                  | Vv04g0524          | .                  | .      | .         | . |
| .                  | .                  | .                  | Gorai.011G080500.1 | .                  | .      | .         | . |
| Vv09g0581          | .                  | .                  | Gorai.010G227200.1 | .                  | Gorai. | .         | . |
| 009G129700.1       | Gorai.011G080600.1 | .                  | Vv11g0506          | .                  | .      | .         | . |
| Tc09_g010830       | Gorai.013G233000.1 | .                  | .                  | Gorai.             | .      | .         | . |
| 009G020100.1       | Gorai.010G065500.1 | Vv04g0526          | .                  | .                  | .      | .         | . |
| Gorai.013G233000.1 | .                  | .                  | Gorai.011G080600.1 | .                  | .      | .         | . |
| Vv09g0582          | .                  | .                  | .                  | .                  | .      | .         | . |
| .                  | .                  | .                  | .                  | .                  | .      | Vv04g0527 | . |
| Tc09_g003770       | .                  | .                  | .                  | .                  | .      | .         | . |
| Vv09g0583          | .                  | .                  | .                  | .                  | .      | .         | . |
| .                  | .                  | .                  | .                  | .                  | .      | .         | . |
| .                  | .                  | .                  | .                  | .                  | .      | .         | . |
| Vv09g0584          | .                  | .                  | .                  | Gorai.011G080700.1 | .      | .         | . |
| .                  | .                  | .                  | .                  | .                  | .      | .         | . |
| .                  | .                  | .                  | .                  | .                  | .      | .         | . |
| Vv09g0585          | .                  | .                  | Gorai.009G129800.1 | .                  | .      | .         | . |
| .                  | Vv11g0508          | Tc09_g010880       | .                  | Gorai.             | .      | .         | . |
| 001G001400.1       | Gorai.004G278000.1 | Gorai.009G019900.1 | .                  | .                  | .      | .         | . |
| .                  | .                  | .                  | .                  | .                  | .      | .         | . |
| Vv09g0586          | .                  | .                  | .                  | .                  | .      | .         | . |
| .                  | .                  | .                  | .                  | .                  | .      | .         | . |
| .                  | .                  | .                  | .                  | .                  | .      | .         | . |
| Vv09g0587          | .                  | .                  | Gorai.009G129900.1 | .                  | .      | .         | . |
| .                  | .                  | .                  | .                  | .                  | .      | .         | . |
| .                  | .                  | .                  | .                  | .                  | .      | .         | . |
| Vv09g0588          | .                  | .                  | .                  | .                  | .      | .         | . |
| .                  | .                  | .                  | .                  | .                  | .      | .         | . |
| .                  | .                  | .                  | .                  | .                  | .      | .         | . |
| Vv09g0589          | .                  | .                  | .                  | .                  | .      | .         | . |
| .                  | .                  | .                  | .                  | .                  | .      | .         | . |
| .                  | .                  | .                  | .                  | .                  | .      | .         | . |
| Vv09g0590          | .                  | .                  | .                  | .                  | .      | .         | . |
| .                  | .                  | .                  | .                  | .                  | .      | .         | . |
| .                  | .                  | .                  | .                  | .                  | .      | .         | . |
| Vv09g0591          | .                  | .                  | .                  | .                  | .      | .         | . |
| .                  | .                  | .                  | .                  | .                  | .      | .         | . |
| .                  | .                  | .                  | .                  | .                  | .      | .         | . |
| Vv09g0592          | .                  | .                  | .                  | .                  | .      | .         | . |
| .                  | .                  | .                  | .                  | .                  | .      | .         | . |
| .                  | .                  | .                  | .                  | .                  | .      | .         | . |
| Vv09g0593          | .                  | .                  | Gorai.010G227000.1 | .                  | Gorai. | .         | . |
| 009G130100.1       | .                  | .                  | .                  | .                  | .      | .         | . |
| .                  | .                  | Vv04g0530          | .                  | Gorai.013G233200.1 | .      | .         | . |
| .                  | .                  | .                  | .                  | .                  | .      | .         | . |
| Vv09g0594          | .                  | .                  | .                  | .                  | .      | .         | . |

|                    |                    |   |   |                    |        |   |   |
|--------------------|--------------------|---|---|--------------------|--------|---|---|
| .                  | .                  | . | . | .                  | .      | . | . |
| .                  | .                  | . | . | .                  | .      | . | . |
| Vv09g0595          | .                  | . | . | .                  | .      | . | . |
| Vv11g0515          | Tc09_g010960       | . | . | Gorai.001G040700.1 | .      | . | . |
| .                  | Vv04g0532          | . | . | Tc01_g039000       | Gorai. | . | . |
| 013G182300.1       | .                  | . | . | .                  | .      | . | . |
| Vv09g0596          | .                  | . | . | .                  | .      | . | . |
| .                  | .                  | . | . | .                  | .      | . | . |
| Vv09g0597          | .                  | . | . | .                  | .      | . | . |
| .                  | .                  | . | . | .                  | .      | . | . |
| Vv09g0598          | .                  | . | . | .                  | .      | . | . |
| .                  | .                  | . | . | .                  | .      | . | . |
| Vv09g0599          | .                  | . | . | .                  | .      | . | . |
| .                  | .                  | . | . | .                  | .      | . | . |
| Vv09g0600          | .                  | . | . | .                  | .      | . | . |
| .                  | .                  | . | . | .                  | .      | . | . |
| Vv09g0601          | .                  | . | . | .                  | .      | . | . |
| .                  | .                  | . | . | .                  | .      | . | . |
| Vv09g0602          | .                  | . | . | .                  | .      | . | . |
| .                  | .                  | . | . | .                  | .      | . | . |
| Vv09g0603          | .                  | . | . | .                  | .      | . | . |
| .                  | .                  | . | . | .                  | .      | . | . |
| Vv09g0604          | .                  | . | . | Gorai.009G130200.1 | .      | . | . |
| Gorai.011G081300.1 | .                  | . | . | .                  | .      | . | . |
| .                  | .                  | . | . | .                  | .      | . | . |
| Vv09g0605          | .                  | . | . | .                  | .      | . | . |
| .                  | .                  | . | . | .                  | .      | . | . |
| Vv09g0606          | .                  | . | . | .                  | .      | . | . |
| .                  | .                  | . | . | .                  | .      | . | . |
| Vv09g0607          | .                  | . | . | .                  | .      | . | . |
| .                  | .                  | . | . | .                  | .      | . | . |
| Vv09g0608          | .                  | . | . | .                  | .      | . | . |
| .                  | .                  | . | . | .                  | .      | . | . |
| Vv09g0609          | .                  | . | . | .                  | .      | . | . |
| Vv11g0517          | Tc09_g010980       | . | . | Gorai.001G040900.1 | .      | . | . |
|                    | Gorai.009G019200.1 | . | . | .                  | .      | . | . |
| .                  | .                  | . | . | .                  | .      | . | . |

|                    |                    |   |   |   |                    |   |
|--------------------|--------------------|---|---|---|--------------------|---|
| Vv09g0610          | .                  | . | . | . | Gorai.011G081400.1 | . |
| .                  | .                  | . | . | . | .                  | . |
| Vv04g0534          | .                  | . | . | . | Gorai.004G274300.1 | . |
| .                  | Gorai.011G081400.1 | . | . | . | .                  | . |
| Vv09g0611          | .                  | . | . | . | Gorai.009G130300.1 | . |
| .                  | .                  | . | . | . | .                  | . |
| .                  | .                  | . | . | . | .                  | . |
| Vv09g0612          | .                  | . | . | . | .                  | . |
| .                  | .                  | . | . | . | .                  | . |
| .                  | .                  | . | . | . | .                  | . |
| Vv09g0613          | .                  | . | . | . | Gorai.009G130400.1 | . |
| Gorai.011G081500.1 | .                  | . | . | . | .                  | . |
| .                  | .                  | . | . | . | .                  | . |
| .                  | .                  | . | . | . | .                  | . |
| Vv09g0614          | .                  | . | . | . | .                  | . |
| Vv11g0521          | Tc09_g011040       | . | . | . | Gorai.001G041000.1 | . |
| .                  | Gorai.010G064800.1 | . | . | . | .                  | . |
| .                  | .                  | . | . | . | .                  | . |
| Vv09g0615          | .                  | . | . | . | .                  | . |
| .                  | .                  | . | . | . | .                  | . |
| .                  | .                  | . | . | . | .                  | . |
| Vv09g0616          | .                  | . | . | . | .                  | . |
| .                  | .                  | . | . | . | .                  | . |
| .                  | .                  | . | . | . | .                  | . |
| Vv09g0617          | .                  | . | . | . | .                  | . |
| .                  | .                  | . | . | . | .                  | . |
| .                  | .                  | . | . | . | .                  | . |
| Vv09g0618          | .                  | . | . | . | Gorai.011G081700.1 | . |
| .                  | .                  | . | . | . | .                  | . |
| .                  | .                  | . | . | . | .                  | . |
| Vv09g0619          | .                  | . | . | . | .                  | . |
| .                  | .                  | . | . | . | .                  | . |
| .                  | .                  | . | . | . | .                  | . |
| Vv09g0620          | .                  | . | . | . | .                  | . |
| Vv11g0524          | Tc09_g011060       | . | . | . | .                  | . |
| .                  | .                  | . | . | . | .                  | . |
| Vv09g0621          | .                  | . | . | . | Gorai.011G081900.1 | . |
| .                  | .                  | . | . | . | .                  | . |
| .                  | .                  | . | . | . | .                  | . |
| Vv09g0622          | .                  | . | . | . | .                  | . |
| .                  | .                  | . | . | . | .                  | . |
| .                  | .                  | . | . | . | .                  | . |
| Vv09g0623          | .                  | . | . | . | .                  | . |
| .                  | .                  | . | . | . | .                  | . |
| .                  | .                  | . | . | . | .                  | . |
| Vv09g0624          | .                  | . | . | . | .                  | . |
| .                  | .                  | . | . | . | .                  | . |
| .                  | .                  | . | . | . | .                  | . |
| Vv09g0625          | .                  | . | . | . | .                  | . |
| .                  | .                  | . | . | . | .                  | . |

|                    |                    |                    |                    |                    |   |   |
|--------------------|--------------------|--------------------|--------------------|--------------------|---|---|
| Vv09g0626          | .                  | .                  | .                  | .                  | . | . |
| Vv11g0531          | Tc09_g011130       | Gorai.013G233800.1 | .                  | .                  | . | . |
|                    | Gorai.009G010100.1 | Gorai.010G064500.1 | Vv04g0542          | .                  | . | . |
|                    | Gorai.013G233800.1 | .                  | Gorai.004G274000.1 | .                  | . | . |
| Vv09g0627          | .                  | .                  | .                  | .                  | . | . |
| Vv09g0628          | .                  | .                  | .                  | .                  | . | . |
| Vv09g0629          | .                  | .                  | .                  | .                  | . | . |
| Vv09g0630          | .                  | .                  | .                  | .                  | . | . |
| Vv09g0631          | .                  | .                  | .                  | Gorai.011G082000.1 | . | . |
|                    | Vv04g0545          | Gorai.013G215500.1 | .                  | .                  | . | . |
|                    | Gorai.011G082000.1 | .                  | .                  | .                  | . | . |
| Vv09g0632          | .                  | .                  | .                  | .                  | . | . |
| Vv09g0633          | .                  | .                  | .                  | .                  | . | . |
| Vv09g0634          | .                  | .                  | Gorai.009G130600.1 | .                  | . | . |
| Gorai.011G082100.1 | .                  | Vv11g0534          | Tc09_g011190       | .                  | . | . |
|                    | .                  | Gorai.010G064400.1 | .                  | .                  | . | . |
| Vv09g0635          | .                  | Gorai.010G226500.1 | .                  | .                  | . | . |
| Vv09g0636          | .                  | Gorai.010G226400.1 | .                  | .                  | . | . |
| Vv09g0637          | .                  | .                  | .                  | .                  | . | . |
| Vv09g0638          | .                  | .                  | .                  | .                  | . | . |
| Vv09g0639          | .                  | .                  | .                  | .                  | . | . |
| Vv09g0640          | .                  | .                  | .                  | .                  | . | . |
| .                  | .                  | .                  | .                  | .                  | . | . |
| .                  | .                  | .                  | .                  | .                  | . | . |

|                    |                    |   |   |   |   |                    |   |
|--------------------|--------------------|---|---|---|---|--------------------|---|
| Vv09g0641          | .                  | . | . | . | . | .                  | . |
| .                  | .                  | . | . | . | . | .                  | . |
| Vv09g0642          | .                  | . | . | . | . | .                  | . |
| .                  | .                  | . | . | . | . | .                  | . |
| Vv09g0643          | .                  | . | . | . | . | .                  | . |
| .                  | .                  | . | . | . | . | .                  | . |
| Vv09g0644          | .                  | . | . | . | . | .                  | . |
| .                  | .                  | . | . | . | . | .                  | . |
| Vv09g0645          | Tc06_g001570       | . | . | . | . | Gorai.             | . |
| 011G082500.1       | .                  | . | . | . | . | .                  | . |
| .                  | .                  | . | . | . | . | .                  | . |
| Vv09g0646          | .                  | . | . | . | . | .                  | . |
| .                  | .                  | . | . | . | . | .                  | . |
| Vv09g0647          | Tc06_g001580       | . | . | . | . | Gorai.009G130700.1 | . |
| .                  | .                  | . | . | . | . | .                  | . |
| .                  | .                  | . | . | . | . | .                  | . |
| Vv09g0648          | Tc06_g001600       | . | . | . | . | Gorai.009G130800.1 | . |
| Gorai.011G082600.1 | .                  | . | . | . | . | .                  | . |
| Tc09_g011370       | Gorai.001G042100.1 | . | . | . | . | Gorai.             | . |
| 009G017600.1       | Vv04g0565          | . | . | . | . | Gorai.             | . |
| 001G042100.1       | Gorai.011G082600.1 | . | . | . | . | .                  | . |
| Vv09g0649          | Tc06_g001610       | . | . | . | . | Gorai.             | . |
| 011G082800.1       | .                  | . | . | . | . | .                  | . |
| .                  | .                  | . | . | . | . | .                  | . |
| Vv09g0650          | Tc06_g001620       | . | . | . | . | Gorai.             | . |
| 011G082900.1       | .                  | . | . | . | . | .                  | . |
| .                  | .                  | . | . | . | . | .                  | . |
| Vv09g0651          | .                  | . | . | . | . | .                  | . |
| .                  | .                  | . | . | . | . | .                  | . |
| .                  | .                  | . | . | . | . | .                  | . |
| Vv09g0652          | Tc06_g001640       | . | . | . | . | Gorai.010G225600.1 | . |
| Gorai.011G083000.1 | .                  | . | . | . | . | Vv11g0564          | . |
| .                  | .                  | . | . | . | . | Vv04g0569          | . |
| Gorai.001G042400.1 | .                  | . | . | . | . | Gorai.009G057800.1 | . |
| Gorai.011G083000.1 | .                  | . | . | . | . | .                  | . |
| Vv09g0653          | Tc06_g001650       | . | . | . | . | Gorai.009G130900.1 | . |
| Gorai.011G083300.1 | .                  | . | . | . | . | .                  | . |
| .                  | .                  | . | . | . | . | .                  | . |
| .                  | .                  | . | . | . | . | .                  | . |
| Vv09g0654          | .                  | . | . | . | . | .                  | . |
| .                  | .                  | . | . | . | . | .                  | . |
| .                  | .                  | . | . | . | . | .                  | . |
| Vv09g0655          | .                  | . | . | . | . | .                  | . |
| .                  | .                  | . | . | . | . | .                  | . |
| .                  | .                  | . | . | . | . | .                  | . |

|                    |                    |                    |                    |                    |
|--------------------|--------------------|--------------------|--------------------|--------------------|
| Vv09g0656          | Tc06_g001670       | .                  | .                  | Gorai.009G131100.1 |
| .                  | .                  | .                  | .                  | .                  |
| Vv09g0657          | .                  | .                  | .                  | .                  |
| .                  | .                  | .                  | .                  | .                  |
| Vv09g0658          | Tc06_g001690       | .                  | .                  | Gorai.009G131200.1 |
| Gorai.011G083600.1 | .                  | .                  | .                  | .                  |
| .                  | .                  | .                  | .                  | .                  |
| Vv09g0659          | Tc06_g001700       | .                  | .                  | Gorai.009G131300.1 |
| .                  | Vv11g0573          | .                  | Tc09_g011490       | Gorai.             |
| 013G234200.1       | Gorai.001G033500.1 | .                  | .                  | Gorai.009G016900.1 |
| Gorai.010G063200.1 | .                  | .                  | .                  | .                  |
| .                  | .                  | .                  | .                  | .                  |
| Vv09g0660          | .                  | .                  | .                  | .                  |
| Vv11g0575          | Tc09_g011500       | Gorai.013G234300.1 | .                  | .                  |
| .                  | Gorai.010G063100.1 | .                  | .                  | .                  |
| .                  | .                  | .                  | .                  | .                  |
| Vv09g0661          | Tc06_g001710       | .                  | .                  | Gorai.             |
| 011G083700.1       | .                  | .                  | .                  | .                  |
| .                  | .                  | .                  | .                  | .                  |
| Vv09g0662          | .                  | .                  | .                  | .                  |
| .                  | .                  | .                  | .                  | .                  |
| .                  | .                  | .                  | .                  | .                  |
| Vv09g0663          | .                  | .                  | .                  | .                  |
| .                  | .                  | .                  | .                  | .                  |
| .                  | .                  | .                  | .                  | .                  |
| Vv09g0664          | .                  | .                  | .                  | .                  |
| .                  | .                  | .                  | .                  | .                  |
| .                  | .                  | .                  | .                  | .                  |
| Vv09g0665          | Tc06_g001720       | Gorai.006G101100.1 | .                  | .                  |
| Gorai.011G083900.1 | .                  | .                  | .                  | .                  |
| .                  | .                  | .                  | .                  | .                  |
| .                  | .                  | .                  | .                  | .                  |
| Vv09g0666          | Tc06_g001730       | .                  | .                  | Gorai.             |
| 011G084000.1       | Vv11g0587          | .                  | Tc09_g031660       | .                  |
| .                  | .                  | .                  | .                  | .                  |
| .                  | .                  | .                  | .                  | .                  |
| Vv09g0667          | .                  | .                  | .                  | .                  |
| .                  | .                  | .                  | .                  | .                  |
| .                  | .                  | .                  | .                  | .                  |
| Vv09g0668          | .                  | .                  | Gorai.009G131500.1 | .                  |
| .                  | .                  | .                  | .                  | .                  |
| .                  | .                  | .                  | .                  | .                  |
| Vv09g0669          | .                  | .                  | .                  | .                  |
| .                  | .                  | .                  | .                  | .                  |
| .                  | .                  | .                  | .                  | .                  |
| Vv09g0670          | Tc06_g001740       | .                  | .                  | .                  |
| .                  | .                  | .                  | .                  | .                  |



|                    |                    |                    |   |   |   |                    |   |
|--------------------|--------------------|--------------------|---|---|---|--------------------|---|
| Vv09g0671          | .                  | .                  | . | . | . | .                  | . |
| Vv11g0623          | Tc09_g012000       | .                  | . | . | . | Gorai.             | . |
| 009G059000.1       | Gorai.010G061000.1 | .                  | . | . | . | .                  | . |
| Vv09g0672          | Tc06_g001760       | .                  | . | . | . | Gorai.009G128500.1 | . |
|                    | Gorai.011G084100.1 | .                  | . | . | . | .                  | . |
| Vv09g0673          | .                  | .                  | . | . | . | .                  | . |
| Vv09g0674          | .                  | .                  | . | . | . | .                  | . |
| Vv09g0675          | .                  | .                  | . | . | . | .                  | . |
| Vv09g0676          | .                  | .                  | . | . | . | .                  | . |
| Vv09g0677          | .                  | .                  | . | . | . | .                  | . |
| Vv09g0678          | Tc06_g001910       | Gorai.006G101300.1 | . | . | . | Gorai.             | . |
| 010G225500.1       | .                  | .                  | . | . | . | .                  | . |
| Vv09g0679          | Tc06_g001920       | .                  | . | . | . | Gorai.009G128400.1 | . |
| Vv09g0680          | .                  | .                  | . | . | . | .                  | . |
| Vv09g0681          | Tc06_g001940       | .                  | . | . | . | Gorai.010G225300.1 | . |
| Gorai.009G128300.1 | .                  | .                  | . | . | . | .                  | . |
| Vv09g0682          | .                  | .                  | . | . | . | .                  | . |
| Vv09g0683          | .                  | .                  | . | . | . | Gorai.009G128200.1 | . |
| Vv09g0684          | .                  | .                  | . | . | . | .                  | . |
| Vv09g0685          | .                  | .                  | . | . | . | .                  | . |

|                    |                    |   |   |                    |   |   |
|--------------------|--------------------|---|---|--------------------|---|---|
| Vv09g0686          | Tc06_g014130       | . | . | .                  | . | . |
| .                  | .                  | . | . | .                  | . | . |
| Vv09g0687          | .                  | . | . | .                  | . | . |
| .                  | .                  | . | . | .                  | . | . |
| Vv09g0688          | Tc06_g014110       | . | . | .                  | . | . |
| .                  | .                  | . | . | .                  | . | . |
| Vv09g0689          | .                  | . | . | Gorai.009G127700.1 | . | . |
| Gorai.011G084400.1 | .                  | . | . | .                  | . | . |
| .                  | .                  | . | . | .                  | . | . |
| Vv09g0690          | .                  | . | . | .                  | . | . |
| .                  | .                  | . | . | .                  | . | . |
| Vv09g0691          | .                  | . | . | Gorai.009G127600.1 | . | . |
| .                  | Vv04g0584          | . | . | Gorai.001G034300.1 | . | . |
| .                  | Gorai.010G115600.1 | . | . | .                  | . | . |
| Vv09g0692          | .                  | . | . | .                  | . | . |
| .                  | .                  | . | . | .                  | . | . |
| Vv09g0693          | Tc06_g002930       | . | . | Gorai.010G225000.1 | . | . |
| .                  | .                  | . | . | .                  | . | . |
| Vv09g0694          | Tc06_g002950       | . | . | Gorai.009G127500.1 | . | . |
| .                  | .                  | . | . | .                  | . | . |
| Vv09g0695          | .                  | . | . | .                  | . | . |
| .                  | .                  | . | . | .                  | . | . |
| Vv09g0696          | .                  | . | . | .                  | . | . |
| .                  | .                  | . | . | .                  | . | . |
| Vv09g0697          | Tc06_g002970       | . | . | Gorai.010G224900.1 | . | . |
| .                  | .                  | . | . | .                  | . | . |
| Vv09g0698          | .                  | . | . | .                  | . | . |
| .                  | .                  | . | . | .                  | . | . |
| Vv09g0699          | .                  | . | . | .                  | . | . |
| .                  | .                  | . | . | .                  | . | . |
| Vv09g0700          | .                  | . | . | .                  | . | . |
| .                  | .                  | . | . | .                  | . | . |
| Vv09g0701          | Tc06_g002980       | . | . | .                  | . | . |
| Gorai.010G140900.1 | .                  | . | . | .                  | . | . |
| .                  | .                  | . | . | .                  | . | . |

|                    |                    |                    |   |   |                    |   |   |
|--------------------|--------------------|--------------------|---|---|--------------------|---|---|
| Vv09g0702          | .                  | .                  | . | . | .                  | . | . |
| .                  | .                  | .                  | . | . | .                  | . | . |
| Vv09g0703          | Tc06_g003120       | .                  | . | . | Gorai.009G127100.1 | . | . |
| Gorai.011G084700.1 | .                  | .                  | . | . | .                  | . | . |
| .                  | .                  | .                  | . | . | .                  | . | . |
| Vv09g0704          | Tc06_g003130       | .                  | . | . | Gorai.             | . | . |
| 011G084800.1       | Vv04g0589          | .                  | . | . | Gorai.             | . | . |
| 001G034600.1       | Gorai.011G084800.1 | .                  | . | . | .                  | . | . |
| .                  | .                  | .                  | . | . | .                  | . | . |
| Vv09g0705          | .                  | .                  | . | . | .                  | . | . |
| .                  | .                  | .                  | . | . | .                  | . | . |
| .                  | .                  | .                  | . | . | .                  | . | . |
| Vv09g0706          | Tc06_g003150       | .                  | . | . | Gorai.010G224300.1 | . | . |
| .                  | .                  | .                  | . | . | .                  | . | . |
| .                  | .                  | .                  | . | . | .                  | . | . |
| Vv09g0707          | Tc06_g003160       | .                  | . | . | .                  | . | . |
| Gorai.010G138400.1 | .                  | .                  | . | . | .                  | . | . |
| .                  | .                  | .                  | . | . | .                  | . | . |
| Vv09g0708          | Gorai.006G101600.1 | .                  | . | . | Gorai.             | . | . |
| 009G127000.1       | Vv04g0593          | .                  | . | . | .                  | . | . |
| .                  | Gorai.011G085000.1 | .                  | . | . | .                  | . | . |
| .                  | .                  | .                  | . | . | .                  | . | . |
| Vv09g0709          | .                  | .                  | . | . | Gorai.011G085000.1 | . | . |
| .                  | .                  | .                  | . | . | .                  | . | . |
| .                  | .                  | .                  | . | . | .                  | . | . |
| Vv09g0710          | .                  | .                  | . | . | .                  | . | . |
| .                  | .                  | .                  | . | . | .                  | . | . |
| .                  | .                  | .                  | . | . | .                  | . | . |
| Vv09g0711          | .                  | .                  | . | . | .                  | . | . |
| .                  | .                  | .                  | . | . | .                  | . | . |
| .                  | .                  | .                  | . | . | .                  | . | . |
| Vv09g0712          | .                  | .                  | . | . | .                  | . | . |
| .                  | .                  | .                  | . | . | .                  | . | . |
| .                  | .                  | .                  | . | . | .                  | . | . |
| Vv09g0713          | .                  | .                  | . | . | .                  | . | . |
| .                  | .                  | .                  | . | . | .                  | . | . |
| .                  | .                  | .                  | . | . | .                  | . | . |
| Vv09g0714          | .                  | .                  | . | . | .                  | . | . |
| .                  | .                  | .                  | . | . | .                  | . | . |
| .                  | .                  | .                  | . | . | .                  | . | . |
| Vv09g0715          | .                  | .                  | . | . | .                  | . | . |
| .                  | .                  | .                  | . | . | .                  | . | . |
| .                  | .                  | .                  | . | . | .                  | . | . |
| Vv09g0716          | Tc06_g003200       | Gorai.006G101700.1 | . | . | .                  | . | . |
| .                  | .                  | .                  | . | . | .                  | . | . |
| .                  | .                  | .                  | . | . | .                  | . | . |
| Vv09g0717          | Tc06_g014070       | .                  | . | . | .                  | . | . |
| .                  | .                  | .                  | . | . | .                  | . | . |

|           |                    |                    |                    |   |   |   |
|-----------|--------------------|--------------------|--------------------|---|---|---|
| Vv09g0718 | Tc06_g003210       | .                  | .                  | . | . | . |
| .         | .                  | .                  | .                  | . | . | . |
| Vv09g0719 | Tc06_g003260       | .                  | Gorai.010G224200.1 | . | . | . |
| .         | Gorai.010G138100.1 | .                  | .                  | . | . | . |
| .         | .                  | .                  | .                  | . | . | . |
| Vv09g0720 | .                  | Gorai.010G222000.1 | .                  | . | . | . |
| .         | .                  | .                  | .                  | . | . | . |
| Vv09g0721 | Tc06_g003280       | .                  | .                  | . | . | . |
| .         | .                  | .                  | .                  | . | . | . |
| Vv09g0722 | .                  | .                  | .                  | . | . | . |
| .         | .                  | .                  | .                  | . | . | . |
| Vv09g0723 | .                  | .                  | .                  | . | . | . |
| .         | .                  | .                  | .                  | . | . | . |
| Vv09g0724 | Tc06_g003480       | .                  | .                  | . | . | . |
| .         | .                  | .                  | .                  | . | . | . |
| Vv09g0725 | .                  | .                  | .                  | . | . | . |
| .         | .                  | .                  | .                  | . | . | . |
| Vv09g0726 | Tc06_g003500       | .                  | Gorai.009G126300.1 | . | . | . |
| .         | .                  | .                  | .                  | . | . | . |
| Vv09g0727 | Tc06_g003510       | .                  | .                  | . | . | . |
| .         | .                  | .                  | .                  | . | . | . |
| Vv09g0728 | .                  | .                  | .                  | . | . | . |
| .         | .                  | .                  | .                  | . | . | . |
| Vv09g0729 | .                  | .                  | .                  | . | . | . |
| .         | .                  | .                  | .                  | . | . | . |
| Vv09g0730 | .                  | .                  | .                  | . | . | . |
| .         | .                  | .                  | .                  | . | . | . |
| Vv09g0731 | .                  | .                  | .                  | . | . | . |
| .         | .                  | .                  | .                  | . | . | . |
| Vv09g0732 | .                  | .                  | .                  | . | . | . |
| .         | .                  | .                  | .                  | . | . | . |
| Vv09g0733 | .                  | .                  | .                  | . | . | . |
| .         | .                  | .                  | .                  | . | . | . |
| .         | .                  | .                  | .                  | . | . | . |

|                    |              |           |   |                    |   |        |   |
|--------------------|--------------|-----------|---|--------------------|---|--------|---|
| Vv09g0734          | .            | .         | . | .                  | . | .      | . |
| .                  | .            | .         | . | .                  | . | .      | . |
| Vv09g0735          | .            | .         | . | .                  | . | .      | . |
| .                  | .            | .         | . | .                  | . | .      | . |
| Vv09g0736          | .            | .         | . | .                  | . | .      | . |
| .                  | .            | .         | . | .                  | . | .      | . |
| Vv09g0737          | .            | .         | . | .                  | . | .      | . |
| .                  | .            | .         | . | .                  | . | .      | . |
| Vv09g0738          | .            | .         | . | .                  | . | .      | . |
| .                  | .            | .         | . | .                  | . | .      | . |
| Vv09g0739          | .            | .         | . | .                  | . | .      | . |
| .                  | .            | .         | . | .                  | . | .      | . |
| Vv09g0740          | .            | .         | . | .                  | . | .      | . |
| .                  | .            | .         | . | .                  | . | .      | . |
| Vv09g0741          | Tc06_g003670 | .         | . | .                  | . | Gorai. | . |
| 011G085400.1       | .            | Vv04g0654 | . | .                  | . | .      | . |
| Gorai.009G060000.1 | .            | .         | . | .                  | . | .      | . |
| .                  | .            | .         | . | .                  | . | .      | . |
| Vv09g0742          | .            | .         | . | .                  | . | .      | . |
| .                  | .            | .         | . | .                  | . | .      | . |
| Vv09g0743          | .            | .         | . | Gorai.009G125900.1 | . | .      | . |
| .                  | .            | .         | . | .                  | . | .      | . |
| Vv09g0744          | .            | .         | . | .                  | . | .      | . |
| .                  | .            | .         | . | .                  | . | .      | . |
| Vv09g0745          | .            | .         | . | .                  | . | .      | . |
| .                  | .            | .         | . | .                  | . | .      | . |
| Vv09g0746          | .            | .         | . | .                  | . | .      | . |
| .                  | .            | .         | . | .                  | . | .      | . |
| Vv09g0747          | .            | .         | . | .                  | . | .      | . |
| .                  | .            | .         | . | .                  | . | .      | . |
| Vv09g0748          | .            | .         | . | .                  | . | .      | . |
| .                  | .            | .         | . | .                  | . | .      | . |
| Vv09g0749          | .            | .         | . | .                  | . | .      | . |
| .                  | .            | .         | . | .                  | . | .      | . |
| Vv09g0750          | .            | .         | . | .                  | . | .      | . |



|           |              |   |   |                    |   |   |   |
|-----------|--------------|---|---|--------------------|---|---|---|
| Vv09g0767 | .            | . | . | .                  | . | . | . |
| .         | .            | . | . | .                  | . | . | . |
| Vv09g0768 | .            | . | . | .                  | . | . | . |
| .         | .            | . | . | .                  | . | . | . |
| Vv09g0769 | .            | . | . | .                  | . | . | . |
| .         | .            | . | . | .                  | . | . | . |
| Vv09g0770 | .            | . | . | .                  | . | . | . |
| .         | .            | . | . | .                  | . | . | . |
| Vv09g0771 | .            | . | . | .                  | . | . | . |
| .         | .            | . | . | .                  | . | . | . |
| Vv09g0772 | .            | . | . | .                  | . | . | . |
| .         | .            | . | . | .                  | . | . | . |
| Vv09g0773 | Tc06_g007830 | . | . | .                  | . | . | . |
| .         | .            | . | . | .                  | . | . | . |
| Vv09g0774 | .            | . | . | .                  | . | . | . |
| .         | .            | . | . | .                  | . | . | . |
| Vv09g0775 | .            | . | . | .                  | . | . | . |
| .         | .            | . | . | .                  | . | . | . |
| Vv09g0776 | .            | . | . | .                  | . | . | . |
| .         | .            | . | . | .                  | . | . | . |
| Vv09g0777 | .            | . | . | .                  | . | . | . |
| .         | .            | . | . | .                  | . | . | . |
| Vv09g0778 | .            | . | . | .                  | . | . | . |
| .         | .            | . | . | .                  | . | . | . |
| Vv09g0779 | .            | . | . | .                  | . | . | . |
| .         | .            | . | . | .                  | . | . | . |
| Vv09g0780 | .            | . | . | .                  | . | . | . |
| .         | .            | . | . | .                  | . | . | . |
| Vv09g0781 | .            | . | . | .                  | . | . | . |
| .         | .            | . | . | .                  | . | . | . |
| Vv09g0782 | .            | . | . | .                  | . | . | . |
| .         | .            | . | . | .                  | . | . | . |
| Vv09g0783 | .            | . | . | Gorai.009G124900.1 | . | . | . |

|           |                    |                    |              |                    |   |   |   |
|-----------|--------------------|--------------------|--------------|--------------------|---|---|---|
| .         | .                  | .                  | .            | .                  | . | . | . |
| .         | .                  | .                  | .            | .                  | . | . | . |
| Vv09g0784 | .                  | .                  | .            | .                  | . | . | . |
| .         | .                  | .                  | .            | .                  | . | . | . |
| Vv09g0785 | .                  | .                  | .            | .                  | . | . | . |
| .         | .                  | .                  | .            | .                  | . | . | . |
| Vv09g0786 | Tc06_g003980       | .                  | .            | Gorai.009G124800.1 | . | . | . |
| .         | .                  | Vv04g0628          | Tc09_g013830 | .                  | . | . | . |
| .         | .                  | Gorai.010G117900.1 | .            | .                  | . | . | . |
| .         | .                  | .                  | .            | .                  | . | . | . |
| Vv09g0787 | .                  | .                  | .            | .                  | . | . | . |
| .         | .                  | .                  | .            | .                  | . | . | . |
| Vv09g0788 | Tc06_g003990       | .                  | .            | .                  | . | . | . |
| .         | .                  | .                  | .            | .                  | . | . | . |
| Vv09g0789 | .                  | .                  | .            | .                  | . | . | . |
| .         | .                  | .                  | .            | .                  | . | . | . |
| Vv09g0790 | .                  | .                  | .            | .                  | . | . | . |
| .         | .                  | .                  | .            | .                  | . | . | . |
| Vv09g0791 | Tc06_g004000       | .                  | .            | Gorai.009G124700.1 | . | . | . |
| .         | .                  | Vv04g0626          | .            | .                  | . | . | . |
| .         | Gorai.009G060800.1 | .                  | .            | .                  | . | . | . |
| .         | .                  | .                  | .            | .                  | . | . | . |
| Vv09g0792 | Tc06_g004010       | .                  | .            | Gorai.009G124600.1 | . | . | . |
| .         | .                  | .                  | .            | .                  | . | . | . |
| Vv09g0793 | Tc06_g019780       | .                  | .            | Gorai.010G183400.1 | . | . | . |
| .         | Gorai.011G011800.1 | .                  | .            | .                  | . | . | . |
| .         | .                  | .                  | .            | .                  | . | . | . |
| Vv09g0794 | .                  | .                  | .            | .                  | . | . | . |
| .         | .                  | .                  | .            | .                  | . | . | . |
| Vv09g0795 | .                  | .                  | .            | .                  | . | . | . |
| .         | .                  | .                  | .            | .                  | . | . | . |
| Vv09g0796 | Tc06_g007860       | Gorai.006G097000.1 | .            | .                  | . | . | . |
| .         | .                  | .                  | .            | .                  | . | . | . |
| Vv09g0797 | .                  | .                  | .            | .                  | . | . | . |
| .         | .                  | .                  | .            | .                  | . | . | . |
| Vv09g0798 | .                  | .                  | .            | .                  | . | . | . |
| .         | .                  | .                  | .            | .                  | . | . | . |
| .         | .                  | .                  | .            | .                  | . | . | . |



|           |   |   |   |   |   |   |   |
|-----------|---|---|---|---|---|---|---|
| Vv09g0799 | . | . | . | . | . | . | . |
| .         | . | . | . | . | . | . | . |
| Vv09g0800 | . | . | . | . | . | . | . |
| .         | . | . | . | . | . | . | . |
| Vv09g0801 | . | . | . | . | . | . | . |
| .         | . | . | . | . | . | . | . |
| Vv09g0802 | . | . | . | . | . | . | . |
| .         | . | . | . | . | . | . | . |
| Vv09g0803 | . | . | . | . | . | . | . |
| .         | . | . | . | . | . | . | . |
| Vv09g0804 | . | . | . | . | . | . | . |
| .         | . | . | . | . | . | . | . |
| Vv09g0805 | . | . | . | . | . | . | . |
| .         | . | . | . | . | . | . | . |
| Vv09g0806 | . | . | . | . | . | . | . |
| .         | . | . | . | . | . | . | . |
| Vv09g0807 | . | . | . | . | . | . | . |
| .         | . | . | . | . | . | . | . |
| Vv09g0808 | . | . | . | . | . | . | . |
| .         | . | . | . | . | . | . | . |
| Vv09g0809 | . | . | . | . | . | . | . |
| .         | . | . | . | . | . | . | . |
| Vv09g0810 | . | . | . | . | . | . | . |
| .         | . | . | . | . | . | . | . |
| Vv09g0811 | . | . | . | . | . | . | . |
| .         | . | . | . | . | . | . | . |
| Vv09g0812 | . | . | . | . | . | . | . |
| .         | . | . | . | . | . | . | . |
| Vv09g0813 | . | . | . | . | . | . | . |
| .         | . | . | . | . | . | . | . |
| Vv09g0814 | . | . | . | . | . | . | . |
| .         | . | . | . | . | . | . | . |
| Vv09g0815 | . | . | . | . | . | . | . |
| .         | . | . | . | . | . | . | . |

|                    |              |           |                    |              |                    |   |   |
|--------------------|--------------|-----------|--------------------|--------------|--------------------|---|---|
| Vv09g0816          | .            | .         | .                  | .            | .                  | . | . |
| .                  | .            | .         | .                  | .            | .                  | . | . |
| Vv09g0817          | .            | .         | .                  | .            | .                  | . | . |
| .                  | .            | .         | .                  | .            | .                  | . | . |
| Vv09g0818          | .            | .         | .                  | .            | .                  | . | . |
| .                  | .            | .         | .                  | .            | .                  | . | . |
| Vv09g0819          | .            | .         | .                  | .            | .                  | . | . |
| .                  | .            | .         | .                  | .            | .                  | . | . |
| Vv09g0820          | .            | .         | .                  | .            | .                  | . | . |
| .                  | .            | .         | .                  | .            | .                  | . | . |
| Vv09g0821          | .            | .         | .                  | .            | .                  | . | . |
| .                  | .            | .         | .                  | .            | .                  | . | . |
| Vv09g0822          | .            | .         | .                  | .            | .                  | . | . |
| .                  | .            | .         | .                  | .            | .                  | . | . |
| Vv09g0823          | .            | .         | .                  | .            | .                  | . | . |
| .                  | .            | .         | .                  | .            | .                  | . | . |
| Vv09g0824          | .            | .         | .                  | .            | .                  | . | . |
| .                  | .            | .         | .                  | .            | .                  | . | . |
| Vv09g0825          | .            | .         | .                  | .            | .                  | . | . |
| .                  | .            | .         | .                  | .            | .                  | . | . |
| Vv09g0826          | .            | .         | .                  | .            | .                  | . | . |
| .                  | .            | .         | .                  | .            | .                  | . | . |
| Vv09g0827          | .            | .         | .                  | .            | .                  | . | . |
| .                  | .            | .         | .                  | .            | .                  | . | . |
| Vv09g0828          | .            | .         | .                  | .            | .                  | . | . |
| .                  | .            | .         | .                  | .            | .                  | . | . |
| Vv09g0829          | .            | .         | .                  | .            | .                  | . | . |
| .                  | .            | .         | .                  | .            | .                  | . | . |
| Vv09g0830          | Tc06_g004420 | .         | .                  | .            | Gorai.009G124000.1 | . | . |
| .                  | .            | Vv04g0603 | .                  | Tc01_g017430 | .                  | . | . |
| Gorai.001G037800.1 | .            | .         | Gorai.009G062400.1 | .            | .                  | . | . |
| .                  | .            | .         | .                  | .            | .                  | . | . |
| Vv09g0831          | Tc06_g004430 | .         | .                  | .            | Gorai.009G123900.1 | . | . |
| .                  | .            | .         | .                  | .            | .                  | . | . |
| .                  | .            | .         | .                  | .            | .                  | . | . |

|           |              |   |   |                    |   |   |   |
|-----------|--------------|---|---|--------------------|---|---|---|
| Vv09g0832 | .            | . | . | .                  | . | . | . |
| .         | .            | . | . | .                  | . | . | . |
| Vv09g0833 | Tc06_g004460 | . | . | .                  | . | . | . |
| .         | .            | . | . | .                  | . | . | . |
| Vv09g0834 | .            | . | . | Gorai.009G123800.1 | . | . | . |
| .         | .            | . | . | .                  | . | . | . |
| Vv09g0835 | Tc06_g004470 | . | . | Gorai.009G123700.1 | . | . | . |
| .         | .            | . | . | .                  | . | . | . |
| Vv09g0836 | .            | . | . | .                  | . | . | . |
| .         | .            | . | . | .                  | . | . | . |
| Vv09g0837 | .            | . | . | .                  | . | . | . |
| .         | .            | . | . | .                  | . | . | . |
| Vv09g0838 | .            | . | . | .                  | . | . | . |
| .         | .            | . | . | .                  | . | . | . |
| Vv09g0839 | .            | . | . | .                  | . | . | . |
| .         | .            | . | . | .                  | . | . | . |
| Vv09g0840 | .            | . | . | .                  | . | . | . |
| .         | .            | . | . | .                  | . | . | . |
| Vv09g0841 | .            | . | . | .                  | . | . | . |
| .         | .            | . | . | .                  | . | . | . |
| Vv09g0842 | Tc06_g004550 | . | . | Gorai.009G123500.1 | . | . | . |
| .         | .            | . | . | .                  | . | . | . |
| Vv09g0843 | .            | . | . | .                  | . | . | . |
| .         | .            | . | . | .                  | . | . | . |
| Vv09g0844 | .            | . | . | .                  | . | . | . |
| .         | .            | . | . | .                  | . | . | . |
| Vv09g0845 | .            | . | . | .                  | . | . | . |
| .         | .            | . | . | .                  | . | . | . |
| Vv09g0846 | .            | . | . | .                  | . | . | . |
| .         | .            | . | . | .                  | . | . | . |
| Vv09g0847 | Tc06_g004560 | . | . | Gorai.009G123400.1 | . | . | . |
| .         | .            | . | . | .                  | . | . | . |
| Vv09g0848 | Tc06_g004570 | . | . | Gorai.009G123300.1 | . | . | . |
| .         | .            | . | . | .                  | . | . | . |

|           |              |   |   |   |                    |   |   |
|-----------|--------------|---|---|---|--------------------|---|---|
| Vv09g0849 | .            | . | . | . | .                  | . | . |
| .         | .            | . | . | . | .                  | . | . |
| Vv09g0850 | .            | . | . | . | .                  | . | . |
| .         | .            | . | . | . | .                  | . | . |
| Vv09g0851 | .            | . | . | . | .                  | . | . |
| .         | .            | . | . | . | .                  | . | . |
| Vv09g0852 | .            | . | . | . | .                  | . | . |
| .         | .            | . | . | . | .                  | . | . |
| Vv09g0853 | .            | . | . | . | .                  | . | . |
| .         | .            | . | . | . | .                  | . | . |
| Vv09g0854 | Tc06_g000660 | . | . | . | .                  | . | . |
| .         | .            | . | . | . | .                  | . | . |
| Vv09g0855 | Tc06_g004590 | . | . | . | Gorai.009G123100.1 | . | . |
| .         | .            | . | . | . | .                  | . | . |
| Vv09g0856 | Tc06_g004610 | . | . | . | Gorai.009G123000.1 | . | . |
| .         | .            | . | . | . | .                  | . | . |
| Vv09g0857 | .            | . | . | . | .                  | . | . |
| .         | .            | . | . | . | .                  | . | . |
| Vv09g0858 | Tc06_g004640 | . | . | . | .                  | . | . |
| .         | .            | . | . | . | .                  | . | . |
| Vv09g0859 | .            | . | . | . | .                  | . | . |
| .         | .            | . | . | . | .                  | . | . |
| Vv09g0860 | Tc06_g004670 | . | . | . | .                  | . | . |
| .         | .            | . | . | . | .                  | . | . |
| Vv09g0861 | Tc06_g004690 | . | . | . | .                  | . | . |
| .         | .            | . | . | . | .                  | . | . |
| Vv09g0862 | .            | . | . | . | .                  | . | . |
| .         | .            | . | . | . | .                  | . | . |
| Vv09g0863 | .            | . | . | . | .                  | . | . |
| .         | .            | . | . | . | .                  | . | . |
| Vv09g0864 | .            | . | . | . | .                  | . | . |
| .         | .            | . | . | . | .                  | . | . |
| Vv09g0865 | Tc06_g004700 | . | . | . | Gorai.009G122900.1 | . | . |

|           |                    |   |   |                    |   |
|-----------|--------------------|---|---|--------------------|---|
| .         | Gorai.010G140900.1 | . | . | .                  | . |
| .         | .                  | . | . | .                  | . |
| .         | .                  | . | . | .                  | . |
| Vv09g0866 | .                  | . | . | .                  | . |
| .         | .                  | . | . | .                  | . |
| Vv09g0867 | .                  | . | . | .                  | . |
| .         | .                  | . | . | .                  | . |
| Vv09g0868 | .                  | . | . | Gorai.009G120100.1 | . |
| .         | .                  | . | . | .                  | . |
| Vv09g0869 | .                  | . | . | .                  | . |
| .         | .                  | . | . | .                  | . |
| Vv09g0870 | .                  | . | . | .                  | . |
| .         | .                  | . | . | .                  | . |
| Vv09g0871 | .                  | . | . | .                  | . |
| .         | .                  | . | . | .                  | . |
| Vv09g0872 | .                  | . | . | .                  | . |
| .         | .                  | . | . | .                  | . |
| Vv09g0873 | .                  | . | . | .                  | . |
| .         | .                  | . | . | .                  | . |
| Vv09g0874 | .                  | . | . | .                  | . |
| .         | .                  | . | . | .                  | . |
| Vv09g0875 | .                  | . | . | .                  | . |
| .         | .                  | . | . | .                  | . |
| Vv09g0876 | .                  | . | . | .                  | . |
| .         | .                  | . | . | .                  | . |
| Vv09g0877 | .                  | . | . | .                  | . |
| .         | .                  | . | . | .                  | . |
| Vv09g0878 | .                  | . | . | .                  | . |
| .         | .                  | . | . | .                  | . |
| Vv09g0879 | .                  | . | . | .                  | . |
| .         | .                  | . | . | .                  | . |
| Vv09g0880 | .                  | . | . | .                  | . |
| .         | .                  | . | . | .                  | . |
| Vv09g0881 | .                  | . | . | .                  | . |
| .         | .                  | . | . | .                  | . |

|           |              |   |   |   |   |   |   |
|-----------|--------------|---|---|---|---|---|---|
| Vv09g0882 | .            | . | . | . | . | . | . |
| .         | .            | . | . | . | . | . | . |
| Vv09g0883 | .            | . | . | . | . | . | . |
| .         | .            | . | . | . | . | . | . |
| Vv09g0884 | .            | . | . | . | . | . | . |
| .         | .            | . | . | . | . | . | . |
| Vv09g0885 | .            | . | . | . | . | . | . |
| .         | .            | . | . | . | . | . | . |
| Vv09g0886 | .            | . | . | . | . | . | . |
| .         | .            | . | . | . | . | . | . |
| Vv09g0887 | .            | . | . | . | . | . | . |
| .         | .            | . | . | . | . | . | . |
| Vv09g0888 | .            | . | . | . | . | . | . |
| .         | .            | . | . | . | . | . | . |
| Vv09g0889 | .            | . | . | . | . | . | . |
| .         | .            | . | . | . | . | . | . |
| Vv09g0890 | .            | . | . | . | . | . | . |
| .         | .            | . | . | . | . | . | . |
| Vv09g0891 | .            | . | . | . | . | . | . |
| .         | .            | . | . | . | . | . | . |
| Vv09g0892 | .            | . | . | . | . | . | . |
| .         | .            | . | . | . | . | . | . |
| Vv09g0893 | .            | . | . | . | . | . | . |
| .         | .            | . | . | . | . | . | . |
| Vv09g0894 | Tc06_g000790 | . | . | . | . | . | . |
| .         | .            | . | . | . | . | . | . |
| Vv09g0895 | .            | . | . | . | . | . | . |
| .         | .            | . | . | . | . | . | . |
| Vv09g0896 | .            | . | . | . | . | . | . |
| .         | .            | . | . | . | . | . | . |
| Vv09g0897 | .            | . | . | . | . | . | . |
| .         | .            | . | . | . | . | . | . |
| Vv09g0898 | .            | . | . | . | . | . | . |

|           |              |   |   |   |   |   |   |
|-----------|--------------|---|---|---|---|---|---|
| .         | .            | . | . | . | . | . | . |
| Vv09g0899 | .            | . | . | . | . | . | . |
| .         | .            | . | . | . | . | . | . |
| Vv09g0900 | .            | . | . | . | . | . | . |
| .         | .            | . | . | . | . | . | . |
| Vv09g0901 | .            | . | . | . | . | . | . |
| .         | .            | . | . | . | . | . | . |
| Vv09g0902 | Tc06_g004910 | . | . | . | . | . | . |
| .         | .            | . | . | . | . | . | . |
| Vv09g0903 | .            | . | . | . | . | . | . |
| .         | .            | . | . | . | . | . | . |
| Vv09g0904 | .            | . | . | . | . | . | . |
| .         | .            | . | . | . | . | . | . |
| Vv09g0905 | .            | . | . | . | . | . | . |
| .         | .            | . | . | . | . | . | . |
| Vv09g0906 | .            | . | . | . | . | . | . |
| .         | .            | . | . | . | . | . | . |
| Vv09g0907 | .            | . | . | . | . | . | . |
| .         | .            | . | . | . | . | . | . |
| Vv09g0908 | .            | . | . | . | . | . | . |
| .         | .            | . | . | . | . | . | . |
| Vv09g0909 | .            | . | . | . | . | . | . |
| .         | .            | . | . | . | . | . | . |
| Vv09g0910 | .            | . | . | . | . | . | . |
| .         | .            | . | . | . | . | . | . |
| Vv09g0911 | .            | . | . | . | . | . | . |
| .         | .            | . | . | . | . | . | . |
| Vv09g0912 | .            | . | . | . | . | . | . |
| .         | .            | . | . | . | . | . | . |
| Vv09g0913 | .            | . | . | . | . | . | . |
| .         | .            | . | . | . | . | . | . |
| Vv09g0914 | .            | . | . | . | . | . | . |
| .         | .            | . | . | . | . | . | . |
| .         | .            | . | . | . | . | . | . |

|                    |              |   |   |                    |        |   |
|--------------------|--------------|---|---|--------------------|--------|---|
| Vv09g0915          | Tc06_g000790 | . | . | .                  | .      | . |
| .                  | .            | . | . | .                  | .      | . |
| Vv09g0916          | .            | . | . | .                  | .      | . |
| .                  | .            | . | . | .                  | .      | . |
| Vv09g0917          | Tc06_g010980 | . | . | .                  | .      | . |
| .                  | .            | . | . | .                  | .      | . |
| Vv09g0918          | .            | . | . | Gorai.009G118900.1 | .      | . |
| .                  | .            | . | . | .                  | .      | . |
| Vv09g0919          | .            | . | . | .                  | .      | . |
| .                  | .            | . | . | .                  | .      | . |
| Vv09g0920          | .            | . | . | .                  | .      | . |
| .                  | .            | . | . | .                  | .      | . |
| Vv09g0921          | .            | . | . | .                  | .      | . |
| .                  | .            | . | . | .                  | .      | . |
| Vv09g0922          | Tc06_g011010 | . | . | Gorai.009G117900.1 | .      | . |
| .                  | .            | . | . | .                  | .      | . |
| Vv09g0923          | Tc06_g011020 | . | . | .                  | Gorai. | . |
| 011G053600.1       | .            | . | . | .                  | .      | . |
| .                  | .            | . | . | .                  | .      | . |
| Vv09g0924          | .            | . | . | .                  | .      | . |
| .                  | .            | . | . | .                  | .      | . |
| Vv09g0925          | Tc06_g011030 | . | . | .                  | .      | . |
| .                  | .            | . | . | .                  | .      | . |
| Vv09g0926          | .            | . | . | .                  | .      | . |
| .                  | .            | . | . | .                  | .      | . |
| Vv09g0927          | Tc06_g011050 | . | . | Gorai.010G172200.1 | .      | . |
| Gorai.011G053400.1 | .            | . | . | .                  | .      | . |
| .                  | .            | . | . | .                  | .      | . |
| Vv09g0928          | .            | . | . | .                  | .      | . |
| .                  | .            | . | . | .                  | .      | . |
| Vv09g0929          | .            | . | . | .                  | .      | . |
| .                  | .            | . | . | .                  | .      | . |
| Vv09g0930          | .            | . | . | .                  | .      | . |
| .                  | .            | . | . | .                  | .      | . |
| Vv09g0931          | .            | . | . | .                  | .      | . |



|                    |              |                    |   |   |   |        |   |
|--------------------|--------------|--------------------|---|---|---|--------|---|
| .                  | .            | .                  | . | . | . | .      | . |
| .                  | .            | .                  | . | . | . | .      | . |
| Vv09g0932          | .            | .                  | . | . | . | .      | . |
| .                  | .            | .                  | . | . | . | .      | . |
| .                  | .            | .                  | . | . | . | .      | . |
| Vv09g0933          | Tc06_g011070 | .                  | . | . | . | Gorai. | . |
| 011G053300.1       | .            | .                  | . | . | . | .      | . |
| .                  | .            | .                  | . | . | . | .      | . |
| Vv09g0934          | .            | .                  | . | . | . | .      | . |
| .                  | .            | .                  | . | . | . | .      | . |
| .                  | .            | .                  | . | . | . | .      | . |
| Vv09g0935          | .            | .                  | . | . | . | .      | . |
| .                  | .            | .                  | . | . | . | .      | . |
| .                  | .            | .                  | . | . | . | .      | . |
| Vv09g0936          | Tc06_g011080 | Gorai.006G091100.1 | . | . | . | .      | . |
| Gorai.011G053200.1 | .            | .                  | . | . | . | .      | . |
| .                  | .            | .                  | . | . | . | .      | . |
| .                  | .            | .                  | . | . | . | .      | . |
| Vv09g0937          | .            | .                  | . | . | . | .      | . |
| .                  | .            | .                  | . | . | . | .      | . |
| .                  | .            | .                  | . | . | . | .      | . |
| Vv09g0938          | Tc06_g011090 | .                  | . | . | . | .      | . |
| .                  | .            | .                  | . | . | . | .      | . |
| .                  | .            | .                  | . | . | . | .      | . |
| Vv09g0939          | .            | .                  | . | . | . | .      | . |
| .                  | .            | .                  | . | . | . | .      | . |
| .                  | .            | .                  | . | . | . | .      | . |
| Vv09g0940          | .            | .                  | . | . | . | .      | . |
| .                  | .            | .                  | . | . | . | .      | . |
| .                  | .            | .                  | . | . | . | .      | . |
| Vv09g0941          | .            | .                  | . | . | . | .      | . |
| .                  | .            | .                  | . | . | . | .      | . |
| .                  | .            | .                  | . | . | . | .      | . |
| Vv09g0942          | .            | .                  | . | . | . | .      | . |
| .                  | .            | .                  | . | . | . | .      | . |
| .                  | .            | .                  | . | . | . | .      | . |
| Vv09g0943          | .            | .                  | . | . | . | .      | . |
| .                  | .            | .                  | . | . | . | .      | . |
| .                  | .            | .                  | . | . | . | .      | . |
| Vv09g0944          | .            | .                  | . | . | . | .      | . |
| .                  | .            | .                  | . | . | . | .      | . |
| .                  | .            | .                  | . | . | . | .      | . |
| Vv09g0945          | .            | .                  | . | . | . | .      | . |
| .                  | .            | .                  | . | . | . | .      | . |
| .                  | .            | .                  | . | . | . | .      | . |
| Vv09g0946          | .            | .                  | . | . | . | .      | . |
| .                  | .            | .                  | . | . | . | .      | . |
| .                  | .            | .                  | . | . | . | .      | . |
| Vv09g0947          | Tc06_g001180 | .                  | . | . | . | .      | . |
| .                  | .            | .                  | . | . | . | .      | . |





|              |              |                    |        |  |  |  |
|--------------|--------------|--------------------|--------|--|--|--|
| Vv09g0981    |              |                    |        |  |  |  |
| Vv09g0982    | Tc06_g014190 | Gorai.006G089200.1 | Gorai. |  |  |  |
| 010G159800.1 |              |                    |        |  |  |  |
| Vv09g0983    |              |                    |        |  |  |  |
| Vv09g0984    |              |                    |        |  |  |  |
| Vv09g0985    |              |                    |        |  |  |  |
| Vv09g0986    |              |                    |        |  |  |  |
| Vv09g0987    |              |                    |        |  |  |  |
| Vv09g0988    |              |                    |        |  |  |  |
| Vv09g0989    |              |                    |        |  |  |  |
| Vv09g0990    |              |                    |        |  |  |  |
| Vv09g0991    |              |                    |        |  |  |  |
| Vv09g0992    |              |                    |        |  |  |  |
| Vv09g0993    |              |                    |        |  |  |  |
| Vv09g0994    |              |                    |        |  |  |  |
| Vv09g0995    |              |                    |        |  |  |  |
| Vv09g0996    | Tc06_g011800 |                    |        |  |  |  |

|           |   |   |   |   |   |   |   |
|-----------|---|---|---|---|---|---|---|
| Vv09g0997 | . | . | . | . | . | . | . |
| .         | . | . | . | . | . | . | . |
| Vv09g0998 | . | . | . | . | . | . | . |
| .         | . | . | . | . | . | . | . |
| Vv09g0999 | . | . | . | . | . | . | . |
| .         | . | . | . | . | . | . | . |
| Vv09g1000 | . | . | . | . | . | . | . |
| .         | . | . | . | . | . | . | . |
| Vv09g1001 | . | . | . | . | . | . | . |
| .         | . | . | . | . | . | . | . |
| Vv09g1002 | . | . | . | . | . | . | . |
| .         | . | . | . | . | . | . | . |
| Vv09g1003 | . | . | . | . | . | . | . |
| .         | . | . | . | . | . | . | . |
| Vv09g1004 | . | . | . | . | . | . | . |
| .         | . | . | . | . | . | . | . |
| Vv09g1005 | . | . | . | . | . | . | . |
| .         | . | . | . | . | . | . | . |
| Vv09g1006 | . | . | . | . | . | . | . |
| .         | . | . | . | . | . | . | . |
| Vv09g1007 | . | . | . | . | . | . | . |
| .         | . | . | . | . | . | . | . |
| Vv09g1008 | . | . | . | . | . | . | . |
| .         | . | . | . | . | . | . | . |
| Vv09g1009 | . | . | . | . | . | . | . |
| .         | . | . | . | . | . | . | . |
| Vv09g1010 | . | . | . | . | . | . | . |
| .         | . | . | . | . | . | . | . |
| Vv09g1011 | . | . | . | . | . | . | . |
| .         | . | . | . | . | . | . | . |
| Vv09g1012 | . | . | . | . | . | . | . |
| .         | . | . | . | . | . | . | . |
| Vv09g1013 | . | . | . | . | . | . | . |
| .         | . | . | . | . | . | . | . |



|           |              |   |   |   |   |   |   |
|-----------|--------------|---|---|---|---|---|---|
| Vv09g1030 | .            | . | . | . | . | . | . |
| .         | .            | . | . | . | . | . | . |
| Vv09g1031 | .            | . | . | . | . | . | . |
| .         | .            | . | . | . | . | . | . |
| Vv09g1032 | .            | . | . | . | . | . | . |
| .         | .            | . | . | . | . | . | . |
| Vv09g1033 | .            | . | . | . | . | . | . |
| .         | .            | . | . | . | . | . | . |
| Vv09g1034 | .            | . | . | . | . | . | . |
| .         | .            | . | . | . | . | . | . |
| Vv09g1035 | .            | . | . | . | . | . | . |
| .         | .            | . | . | . | . | . | . |
| Vv09g1036 | .            | . | . | . | . | . | . |
| .         | .            | . | . | . | . | . | . |
| Vv09g1037 | .            | . | . | . | . | . | . |
| .         | .            | . | . | . | . | . | . |
| Vv09g1038 | Tc06_g012700 | . | . | . | . | . | . |
| .         | .            | . | . | . | . | . | . |
| Vv09g1039 | .            | . | . | . | . | . | . |
| .         | .            | . | . | . | . | . | . |
| Vv09g1040 | .            | . | . | . | . | . | . |
| .         | .            | . | . | . | . | . | . |
| Vv09g1041 | .            | . | . | . | . | . | . |
| .         | .            | . | . | . | . | . | . |
| Vv09g1042 | .            | . | . | . | . | . | . |
| .         | .            | . | . | . | . | . | . |
| Vv09g1043 | .            | . | . | . | . | . | . |
| .         | .            | . | . | . | . | . | . |
| Vv09g1044 | .            | . | . | . | . | . | . |
| .         | .            | . | . | . | . | . | . |
| Vv09g1045 | .            | . | . | . | . | . | . |
| .         | .            | . | . | . | . | . | . |
| Vv09g1046 | .            | . | . | . | . | . | . |
| .         | .            | . | . | . | . | . | . |

|           |              |   |   |   |   |   |   |
|-----------|--------------|---|---|---|---|---|---|
| Vv09g1047 | .            | . | . | . | . | . | . |
| .         | .            | . | . | . | . | . | . |
| Vv09g1048 | .            | . | . | . | . | . | . |
| .         | .            | . | . | . | . | . | . |
| Vv09g1049 | .            | . | . | . | . | . | . |
| .         | .            | . | . | . | . | . | . |
| Vv09g1050 | .            | . | . | . | . | . | . |
| .         | .            | . | . | . | . | . | . |
| Vv09g1051 | .            | . | . | . | . | . | . |
| .         | .            | . | . | . | . | . | . |
| Vv09g1052 | .            | . | . | . | . | . | . |
| .         | .            | . | . | . | . | . | . |
| Vv09g1053 | .            | . | . | . | . | . | . |
| .         | .            | . | . | . | . | . | . |
| Vv09g1054 | .            | . | . | . | . | . | . |
| .         | .            | . | . | . | . | . | . |
| Vv09g1055 | .            | . | . | . | . | . | . |
| .         | .            | . | . | . | . | . | . |
| Vv09g1056 | Tc06_g003390 | . | . | . | . | . | . |
| .         | .            | . | . | . | . | . | . |
| Vv09g1057 | .            | . | . | . | . | . | . |
| .         | .            | . | . | . | . | . | . |
| Vv09g1058 | .            | . | . | . | . | . | . |
| .         | .            | . | . | . | . | . | . |
| Vv09g1059 | .            | . | . | . | . | . | . |
| .         | .            | . | . | . | . | . | . |
| Vv09g1060 | .            | . | . | . | . | . | . |
| .         | .            | . | . | . | . | . | . |
| Vv09g1061 | .            | . | . | . | . | . | . |
| .         | .            | . | . | . | . | . | . |
| Vv09g1062 | .            | . | . | . | . | . | . |
| .         | .            | . | . | . | . | . | . |
| Vv09g1063 | .            | . | . | . | . | . | . |



|           |   |   |   |   |                    |   |   |
|-----------|---|---|---|---|--------------------|---|---|
| .         | . | . | . | . | .                  | . | . |
| Vv09g1064 | . | . | . | . | .                  | . | . |
| Vv09g1065 | . | . | . | . | .                  | . | . |
| Vv09g1066 | . | . | . | . | .                  | . | . |
| Vv09g1067 | . | . | . | . | .                  | . | . |
| Vv09g1068 | . | . | . | . | .                  | . | . |
| Vv09g1069 | . | . | . | . | Gorai.011G000500.1 | . | . |
| Vv09g1070 | . | . | . | . | .                  | . | . |
| Vv09g1071 | . | . | . | . | .                  | . | . |
| Vv09g1072 | . | . | . | . | .                  | . | . |
| Vv09g1073 | . | . | . | . | .                  | . | . |
| Vv09g1074 | . | . | . | . | .                  | . | . |
| Vv09g1075 | . | . | . | . | .                  | . | . |
| Vv09g1076 | . | . | . | . | .                  | . | . |
| Vv09g1077 | . | . | . | . | .                  | . | . |
| Vv09g1078 | . | . | . | . | Gorai.009G118800.1 | . | . |
| Vv09g1079 | . | . | . | . | .                  | . | . |
| .         | . | . | . | . | .                  | . | . |

|                    |                    |   |   |   |                    |   |   |
|--------------------|--------------------|---|---|---|--------------------|---|---|
| Vv09g1080          | .                  | . | . | . | .                  | . | . |
| .                  | .                  | . | . | . | .                  | . | . |
| Vv09g1081          | .                  | . | . | . | .                  | . | . |
| .                  | .                  | . | . | . | .                  | . | . |
| Vv09g1082          | .                  | . | . | . | .                  | . | . |
| .                  | .                  | . | . | . | .                  | . | . |
| Vv09g1083          | .                  | . | . | . | .                  | . | . |
| .                  | .                  | . | . | . | .                  | . | . |
| Vv09g1084          | .                  | . | . | . | .                  | . | . |
| .                  | .                  | . | . | . | .                  | . | . |
| Vv09g1085          | .                  | . | . | . | .                  | . | . |
| .                  | .                  | . | . | . | .                  | . | . |
| Vv09g1086          | .                  | . | . | . | .                  | . | . |
| .                  | .                  | . | . | . | .                  | . | . |
| Vv09g1087          | .                  | . | . | . | .                  | . | . |
| .                  | .                  | . | . | . | .                  | . | . |
| Vv09g1088          | Tc06_g006030       | . | . | . | .                  | . | . |
| .                  | .                  | . | . | . | .                  | . | . |
| Vv09g1089          | Gorai.010G141300.1 | . | . | . | Gorai.011G002000.1 | . | . |
| .                  | .                  | . | . | . | .                  | . | . |
| Vv09g1090          | .                  | . | . | . | .                  | . | . |
| .                  | .                  | . | . | . | .                  | . | . |
| Vv09g1091          | .                  | . | . | . | .                  | . | . |
| .                  | .                  | . | . | . | .                  | . | . |
| Vv09g1092          | Tc06_g005130       | . | . | . | .                  | . | . |
| .                  | .                  | . | . | . | .                  | . | . |
| Vv09g1093          | Tc06_g005150       | . | . | . | Gorai.             | . | . |
| 011G002200.1       | Gorai.010G141400.1 | . | . | . | .                  | . | . |
| .                  | .                  | . | . | . | .                  | . | . |
| Vv09g1094          | .                  | . | . | . | .                  | . | . |
| .                  | .                  | . | . | . | .                  | . | . |
| Vv09g1095          | Tc06_g005160       | . | . | . | .                  | . | . |
| Gorai.010G141600.1 | .                  | . | . | . | .                  | . | . |
| .                  | .                  | . | . | . | .                  | . | . |

|                    |              |   |   |   |                    |   |
|--------------------|--------------|---|---|---|--------------------|---|
| Vv09g1096          | Tc06_g005220 | . | . | . | .                  | . |
| .                  | .            | . | . | . | .                  | . |
| Vv09g1097          | Tc06_g005250 | . | . | . | .                  | . |
| .                  | .            | . | . | . | .                  | . |
| Vv09g1098          | Tc06_g005260 | . | . | . | .                  | . |
| .                  | .            | . | . | . | .                  | . |
| Vv09g1099          | .            | . | . | . | .                  | . |
| .                  | .            | . | . | . | .                  | . |
| Vv09g1100          | Tc06_g005270 | . | . | . | .                  | . |
| .                  | .            | . | . | . | .                  | . |
| Vv09g1101          | .            | . | . | . | .                  | . |
| .                  | .            | . | . | . | .                  | . |
| Vv09g1102          | Tc06_g005330 | . | . | . | Gorai.             | . |
| 011G002300.1       | .            | . | . | . | .                  | . |
| .                  | .            | . | . | . | .                  | . |
| Vv09g1103          | Tc06_g005400 | . | . | . | .                  | . |
| Gorai.010G141800.1 | .            | . | . | . | .                  | . |
| .                  | .            | . | . | . | .                  | . |
| Vv09g1104          | .            | . | . | . | .                  | . |
| .                  | .            | . | . | . | .                  | . |
| .                  | .            | . | . | . | .                  | . |
| Vv09g1105          | Tc06_g005420 | . | . | . | Gorai.             | . |
| 011G002500.1       | .            | . | . | . | .                  | . |
| .                  | .            | . | . | . | .                  | . |
| Vv09g1106          | Tc06_g014990 | . | . | . | .                  | . |
| .                  | .            | . | . | . | .                  | . |
| .                  | .            | . | . | . | .                  | . |
| Vv09g1107          | Tc06_g014980 | . | . | . | .                  | . |
| .                  | .            | . | . | . | .                  | . |
| .                  | .            | . | . | . | .                  | . |
| Vv09g1108          | .            | . | . | . | .                  | . |
| .                  | .            | . | . | . | .                  | . |
| .                  | .            | . | . | . | .                  | . |
| Vv09g1109          | .            | . | . | . | .                  | . |
| .                  | .            | . | . | . | .                  | . |
| .                  | .            | . | . | . | .                  | . |
| Vv09g1110          | .            | . | . | . | .                  | . |
| .                  | .            | . | . | . | .                  | . |
| .                  | .            | . | . | . | .                  | . |
| Vv09g1111          | .            | . | . | . | .                  | . |
| .                  | .            | . | . | . | .                  | . |
| .                  | .            | . | . | . | .                  | . |
| Vv09g1112          | Tc06_g005480 | . | . | . | Gorai.009G119300.1 | . |
| Gorai.011G002600.1 | .            | . | . | . | .                  | . |

|              |              |   |   |   |                    |        |   |
|--------------|--------------|---|---|---|--------------------|--------|---|
| .            | .            | . | . | . | .                  | .      | . |
| .            | .            | . | . | . | .                  | .      | . |
| Vv09g1113    | .            | . | . | . | .                  | .      | . |
| .            | .            | . | . | . | .                  | .      | . |
| Vv09g1114    | Tc06_g005520 | . | . | . | .                  | .      | . |
| .            | .            | . | . | . | .                  | .      | . |
| Vv09g1115    | .            | . | . | . | .                  | .      | . |
| .            | .            | . | . | . | .                  | .      | . |
| Vv09g1116    | .            | . | . | . | .                  | .      | . |
| .            | .            | . | . | . | .                  | .      | . |
| Vv09g1117    | .            | . | . | . | Gorai.011G002700.1 | .      | . |
| .            | .            | . | . | . | .                  | .      | . |
| Vv09g1118    | .            | . | . | . | .                  | .      | . |
| .            | .            | . | . | . | .                  | .      | . |
| Vv09g1119    | .            | . | . | . | .                  | .      | . |
| .            | .            | . | . | . | .                  | .      | . |
| Vv09g1120    | .            | . | . | . | .                  | .      | . |
| .            | .            | . | . | . | .                  | .      | . |
| Vv09g1121    | .            | . | . | . | .                  | Gorai. | . |
| 010G142500.1 | .            | . | . | . | .                  | .      | . |
| .            | .            | . | . | . | .                  | .      | . |
| Vv09g1122    | .            | . | . | . | .                  | .      | . |
| .            | .            | . | . | . | .                  | .      | . |
| Vv09g1123    | .            | . | . | . | .                  | .      | . |
| .            | .            | . | . | . | .                  | .      | . |
| Vv09g1124    | Tc06_g006020 | . | . | . | .                  | .      | . |
| .            | .            | . | . | . | .                  | .      | . |
| Vv09g1125    | .            | . | . | . | .                  | .      | . |
| .            | .            | . | . | . | .                  | .      | . |
| Vv09g1126    | Tc06_g005980 | . | . | . | .                  | .      | . |
| .            | .            | . | . | . | .                  | .      | . |
| Vv09g1127    | Tc06_g005970 | . | . | . | .                  | .      | . |
| .            | .            | . | . | . | .                  | .      | . |
| Vv09g1128    | .            | . | . | . | .                  | .      | . |
| .            | .            | . | . | . | .                  | .      | . |
| .            | .            | . | . | . | .                  | .      | . |

|           |              |   |   |                    |
|-----------|--------------|---|---|--------------------|
| Vv09g1129 | Tc06_g005930 | . | . | Gorai.009G119900.1 |
| .         | .            | . | . | .                  |
| .         | .            | . | . | .                  |
| Vv09g1130 | Tc06_g005910 | . | . | Gorai.009G120000.1 |
| .         | .            | . | . | .                  |
| .         | .            | . | . | .                  |
| Vv09g1131 | Tc06_g005880 | . | . | .                  |
| .         | .            | . | . | .                  |
| .         | .            | . | . | .                  |
| Vv09g1132 | .            | . | . | .                  |
| Vv10g0249 | .            | . | . | .                  |
| .         | .            | . | . | .                  |
| Vv09g1133 | .            | . | . | .                  |
| .         | .            | . | . | .                  |
| .         | .            | . | . | .                  |
| Vv09g1134 | .            | . | . | .                  |
| .         | .            | . | . | .                  |
| .         | .            | . | . | .                  |
| Vv09g1135 | .            | . | . | .                  |
| .         | .            | . | . | .                  |
| .         | .            | . | . | .                  |
| Vv09g1136 | Tc06_g005740 | . | . | .                  |
| .         | .            | . | . | .                  |
| .         | .            | . | . | .                  |
| Vv09g1137 | .            | . | . | .                  |
| .         | .            | . | . | .                  |
| .         | .            | . | . | .                  |
| Vv09g1138 | Tc06_g005790 | . | . | .                  |
| .         | .            | . | . | .                  |
| .         | .            | . | . | .                  |
| Vv09g1139 | Tc06_g005800 | . | . | .                  |
| .         | .            | . | . | .                  |
| .         | .            | . | . | .                  |
| Vv09g1140 | .            | . | . | .                  |
| .         | .            | . | . | .                  |
| .         | .            | . | . | .                  |
| Vv09g1141 | .            | . | . | .                  |
| .         | .            | . | . | .                  |
| .         | .            | . | . | .                  |
| Vv09g1142 | .            | . | . | .                  |
| .         | .            | . | . | .                  |
| .         | .            | . | . | .                  |
| Vv09g1143 | .            | . | . | .                  |
| .         | .            | . | . | .                  |
| .         | .            | . | . | .                  |
| Vv09g1144 | .            | . | . | .                  |
| .         | .            | . | . | .                  |
| .         | .            | . | . | .                  |
| Vv09g1145 | .            | . | . | .                  |
| .         | .            | . | . | .                  |

|           |              |   |   |                    |   |
|-----------|--------------|---|---|--------------------|---|
| Vv09g1146 | Tc06_g005800 | . | . | .                  | . |
| .         | .            | . | . | .                  | . |
| Vv09g1147 | .            | . | . | .                  | . |
| .         | .            | . | . | .                  | . |
| Vv09g1148 | .            | . | . | .                  | . |
| .         | .            | . | . | .                  | . |
| Vv09g1149 | Tc06_g005790 | . | . | .                  | . |
| .         | .            | . | . | .                  | . |
| Vv09g1150 | .            | . | . | .                  | . |
| .         | .            | . | . | .                  | . |
| Vv09g1151 | .            | . | . | .                  | . |
| .         | .            | . | . | .                  | . |
| Vv09g1152 | .            | . | . | .                  | . |
| .         | .            | . | . | .                  | . |
| Vv09g1153 | .            | . | . | .                  | . |
| .         | .            | . | . | .                  | . |
| Vv09g1154 | .            | . | . | .                  | . |
| .         | .            | . | . | .                  | . |
| Vv09g1155 | .            | . | . | .                  | . |
| .         | .            | . | . | .                  | . |
| Vv09g1156 | .            | . | . | .                  | . |
| .         | .            | . | . | .                  | . |
| Vv09g1157 | .            | . | . | .                  | . |
| .         | .            | . | . | .                  | . |
| Vv09g1158 | Tc06_g003810 | . | . | .                  | . |
| .         | .            | . | . | .                  | . |
| Vv09g1159 | .            | . | . | .                  | . |
| .         | .            | . | . | .                  | . |
| Vv09g1160 | Tc06_g003840 | . | . | Gorai.009G120100.1 | . |
| .         | .            | . | . | .                  | . |
| Vv09g1161 | .            | . | . | .                  | . |
| .         | .            | . | . | .                  | . |
| Vv09g1162 | .            | . | . | .                  | . |

|           |              |   |   |   |   |   |   |
|-----------|--------------|---|---|---|---|---|---|
| .         | .            | . | . | . | . | . | . |
| .         | .            | . | . | . | . | . | . |
| Vv09g1163 | .            | . | . | . | . | . | . |
| .         | .            | . | . | . | . | . | . |
| .         | .            | . | . | . | . | . | . |
| Vv09g1164 | .            | . | . | . | . | . | . |
| Vv10g0248 | Tc06_g012600 | . | . | . | . | . | . |
| .         | .            | . | . | . | . | . | . |
| Vv09g1165 | .            | . | . | . | . | . | . |
| .         | .            | . | . | . | . | . | . |
| .         | .            | . | . | . | . | . | . |
| Vv09g1166 | .            | . | . | . | . | . | . |
| .         | .            | . | . | . | . | . | . |
| .         | .            | . | . | . | . | . | . |
| Vv09g1167 | .            | . | . | . | . | . | . |
| .         | .            | . | . | . | . | . | . |
| .         | .            | . | . | . | . | . | . |
| Vv09g1168 | .            | . | . | . | . | . | . |
| .         | .            | . | . | . | . | . | . |
| .         | .            | . | . | . | . | . | . |
| Vv09g1169 | .            | . | . | . | . | . | . |
| Vv10g0241 | .            | . | . | . | . | . | . |
| .         | .            | . | . | . | . | . | . |
| Vv09g1170 | .            | . | . | . | . | . | . |
| .         | .            | . | . | . | . | . | . |
| .         | .            | . | . | . | . | . | . |
| Vv09g1171 | .            | . | . | . | . | . | . |
| .         | .            | . | . | . | . | . | . |
| .         | .            | . | . | . | . | . | . |
| Vv09g1172 | .            | . | . | . | . | . | . |
| Vv10g0240 | .            | . | . | . | . | . | . |
| .         | .            | . | . | . | . | . | . |
| Vv09g1173 | .            | . | . | . | . | . | . |
| .         | .            | . | . | . | . | . | . |
| .         | .            | . | . | . | . | . | . |
| Vv09g1174 | .            | . | . | . | . | . | . |
| Vv10g0239 | .            | . | . | . | . | . | . |
| .         | .            | . | . | . | . | . | . |
| Vv09g1175 | .            | . | . | . | . | . | . |
| .         | .            | . | . | . | . | . | . |
| .         | .            | . | . | . | . | . | . |
| Vv09g1176 | .            | . | . | . | . | . | . |
| Vv10g0237 | .            | . | . | . | . | . | . |
| .         | .            | . | . | . | . | . | . |
| Vv09g1177 | .            | . | . | . | . | . | . |
| Vv10g0234 | .            | . | . | . | . | . | . |
| .         | .            | . | . | . | . | . | . |
| Vv09g1178 | .            | . | . | . | . | . | . |
| .         | .            | . | . | . | . | . | . |
| .         | .            | . | . | . | . | . | . |

|           |              |   |   |   |   |   |   |
|-----------|--------------|---|---|---|---|---|---|
| Vv09g1179 | .            | . | . | . | . | . | . |
| .         | .            | . | . | . | . | . | . |
| Vv09g1180 | .            | . | . | . | . | . | . |
| .         | .            | . | . | . | . | . | . |
| Vv09g1181 | .            | . | . | . | . | . | . |
| .         | .            | . | . | . | . | . | . |
| Vv09g1182 | .            | . | . | . | . | . | . |
| .         | .            | . | . | . | . | . | . |
| Vv09g1183 | .            | . | . | . | . | . | . |
| .         | .            | . | . | . | . | . | . |
| Vv09g1184 | .            | . | . | . | . | . | . |
| .         | .            | . | . | . | . | . | . |
| Vv09g1185 | .            | . | . | . | . | . | . |
| .         | .            | . | . | . | . | . | . |
| Vv09g1186 | Tc06_g005720 | . | . | . | . | . | . |
| .         | .            | . | . | . | . | . | . |
| Vv09g1187 | .            | . | . | . | . | . | . |
| .         | .            | . | . | . | . | . | . |
| Vv09g1188 | .            | . | . | . | . | . | . |
| .         | .            | . | . | . | . | . | . |
| Vv09g1189 | .            | . | . | . | . | . | . |
| .         | .            | . | . | . | . | . | . |
| Vv09g1190 | .            | . | . | . | . | . | . |
| .         | .            | . | . | . | . | . | . |
| Vv09g1191 | .            | . | . | . | . | . | . |
| .         | .            | . | . | . | . | . | . |
| Vv09g1192 | .            | . | . | . | . | . | . |
| .         | .            | . | . | . | . | . | . |
| Vv09g1193 | .            | . | . | . | . | . | . |
| .         | .            | . | . | . | . | . | . |
| Vv09g1194 | .            | . | . | . | . | . | . |
| .         | .            | . | . | . | . | . | . |
| Vv09g1195 | .            | . | . | . | . | . | . |
| .         | .            | . | . | . | . | . | . |



|           |              |   |   |                    |   |
|-----------|--------------|---|---|--------------------|---|
| Vv09g1196 | Tc06_g003870 | . | . | .                  | . |
| .         | .            | . | . | .                  | . |
| Vv09g1197 | .            | . | . | Gorai.009G120600.1 | . |
| .         | .            | . | . | .                  | . |
| Vv09g1198 | .            | . | . | .                  | . |
| .         | .            | . | . | .                  | . |
| Vv09g1199 | .            | . | . | Gorai.009G120700.1 | . |
| .         | .            | . | . | .                  | . |
| Vv09g1200 | .            | . | . | Gorai.009G120800.1 | . |
| .         | .            | . | . | .                  | . |
| Vv09g1201 | .            | . | . | Gorai.009G120900.1 | . |
| .         | .            | . | . | .                  | . |
| Vv09g1202 | .            | . | . | .                  | . |
| .         | .            | . | . | .                  | . |
| Vv09g1203 | Tc06_g005350 | . | . | .                  | . |
| .         | .            | . | . | .                  | . |
| Vv09g1204 | .            | . | . | Gorai.009G121000.1 | . |
| .         | .            | . | . | .                  | . |
| Vv09g1205 | .            | . | . | .                  | . |
| .         | .            | . | . | .                  | . |
| Vv09g1206 | .            | . | . | Gorai.009G121100.1 | . |
| .         | .            | . | . | .                  | . |
| Vv09g1207 | .            | . | . | .                  | . |
| .         | .            | . | . | .                  | . |
| Vv09g1208 | .            | . | . | .                  | . |
| .         | .            | . | . | .                  | . |
| Vv09g1209 | .            | . | . | Gorai.009G121200.1 | . |
| .         | .            | . | . | .                  | . |
| Vv09g1210 | .            | . | . | Gorai.009G121300.1 | . |
| .         | .            | . | . | .                  | . |
| Vv09g1211 | .            | . | . | .                  | . |
| .         | .            | . | . | .                  | . |
| Vv09g1212 | .            | . | . | Gorai.009G121500.1 | . |

|                    |                    |   |   |                    |           |   |   |
|--------------------|--------------------|---|---|--------------------|-----------|---|---|
| .                  | .                  | . | . | .                  | .         | . | . |
| Vv09g1213          | .                  | . | . | Gorai.009G121600.1 | .         | . | . |
| .                  | .                  | . | . | .                  | .         | . | . |
| Vv09g1214          | .                  | . | . | Gorai.009G121700.1 | .         | . | . |
| .                  | .                  | . | . | .                  | .         | . | . |
| Vv09g1215          | .                  | . | . | .                  | .         | . | . |
| .                  | .                  | . | . | .                  | .         | . | . |
| Vv09g1216          | .                  | . | . | .                  | .         | . | . |
| .                  | .                  | . | . | .                  | .         | . | . |
| Vv09g1217          | .                  | . | . | .                  | .         | . | . |
| .                  | .                  | . | . | .                  | .         | . | . |
| Vv09g1218          | .                  | . | . | .                  | .         | . | . |
| .                  | .                  | . | . | .                  | .         | . | . |
| Vv09g1219          | .                  | . | . | .                  | .         | . | . |
| .                  | .                  | . | . | .                  | .         | . | . |
| Vv09g1220          | .                  | . | . | .                  | .         | . | . |
| .                  | .                  | . | . | .                  | .         | . | . |
| Vv09g1221          | .                  | . | . | .                  | .         | . | . |
| .                  | .                  | . | . | .                  | .         | . | . |
| Vv10g0001          | Tc06_g015710       | . | . | .                  | Gorai.    | . | . |
| 011G028300.1       | .                  | . | . | .                  | .         | . | . |
| .                  | .                  | . | . | .                  | .         | . | . |
| Vv10g0002          | .                  | . | . | .                  | .         | . | . |
| .                  | .                  | . | . | .                  | .         | . | . |
| Vv10g0003          | .                  | . | . | .                  | .         | . | . |
| .                  | .                  | . | . | .                  | .         | . | . |
| Vv10g0004          | Tc06_g015680       | . | . | Gorai.010G154300.1 | .         | . | . |
| Gorai.009G168900.1 | .                  | . | . | Gorai.010G154300.1 | .         | . | . |
| .                  | .                  | . | . | .                  | .         | . | . |
| Vv10g0005          | Tc06_g015670       | . | . | Gorai.010G154500.1 | .         | . | . |
| Gorai.009G168800.1 | .                  | . | . | Gorai.010G154500.1 | Vv19g0246 | . | . |
| .                  | .                  | . | . | Gorai.002G069400.1 | Gorai.    | . | . |
| 009G384400.1       | .                  | . | . | .                  | .         | . | . |
| .                  | .                  | . | . | .                  | .         | . | . |
| Vv10g0006          | Tc06_g015660       | . | . | Gorai.010G154800.1 | .         | . | . |
| .                  | Gorai.010G154800.1 | . | . | Vv12g0350          | .         | . | . |
| .                  | .                  | . | . | .                  | .         | . | . |

|                    |                    |                    |   |
|--------------------|--------------------|--------------------|---|
| Vv10g0007          | Tc06_g015650       | Gorai.010G155000.1 | . |
| .                  | Gorai.010G155000.1 | .                  | . |
| .                  | .                  | .                  | . |
| .                  | .                  | .                  | . |
| Vv10g0008          | Tc06_g015630       | Gorai.009G168700.1 | . |
| .                  | Gorai.010G256300.1 | .                  | . |
| .                  | .                  | .                  | . |
| .                  | .                  | .                  | . |
| Vv10g0009          | Tc06_g015600       | Gorai.009G168600.1 | . |
| .                  | Gorai.010G256400.1 | .                  | . |
| .                  | .                  | .                  | . |
| .                  | .                  | .                  | . |
| Vv10g0010          | Tc06_g015580       | Gorai.             | . |
| 011G029100.1       | .                  | .                  | . |
| .                  | .                  | .                  | . |
| .                  | .                  | .                  | . |
| Vv10g0011          | Tc06_g015570       | Gorai.010G155200.1 | . |
| Gorai.009G168400.1 | Gorai.011G029200.1 | .                  | . |
| .                  | .                  | .                  | . |
| .                  | .                  | .                  | . |
| Vv10g0012          | .                  | .                  | . |
| .                  | .                  | .                  | . |
| .                  | .                  | .                  | . |
| Vv10g0013          | Tc06_g015560       | Gorai.009G168300.1 | . |
| Gorai.011G029300.1 | .                  | .                  | . |
| .                  | .                  | .                  | . |
| .                  | .                  | .                  | . |
| Vv10g0014          | Tc06_g015550       | Gorai.             | . |
| 011G029400.1       | Vv12g0338          | Tc01_g000650       | . |
| .                  | Gorai.003G003200.1 | Vv19g0234          | . |
| Tc07_g008410       | .                  | Gorai.002G068300.1 | . |
| Vv10g0015          | Tc06_g015540       | Gorai.010G155300.1 | . |
| .                  | .                  | .                  | . |
| .                  | .                  | .                  | . |
| Vv10g0016          | Tc06_g015530       | Gorai.010G155400.1 | . |
| .                  | .                  | .                  | . |
| .                  | .                  | .                  | . |
| Vv10g0017          | Tc06_g015520       | .                  | . |
| .                  | .                  | .                  | . |
| .                  | .                  | .                  | . |
| Vv10g0018          | .                  | Gorai.010G155500.1 | . |
| .                  | Vv12g0337          | .                  | . |
| .                  | .                  | .                  | . |
| Vv10g0019          | Tc06_g015510       | Gorai.010G155600.1 | . |
| .                  | .                  | .                  | . |
| .                  | .                  | .                  | . |
| Vv10g0020          | Tc06_g015500       | Gorai.009G167600.1 | . |
| .                  | Gorai.010G256500.1 | .                  | . |
| .                  | .                  | .                  | . |
| .                  | .                  | .                  | . |

|              |                    |                    |                    |   |
|--------------|--------------------|--------------------|--------------------|---|
| Vv10g0021    | Tc06_g015480       | Gorai.006G087900.1 | .                  | . |
|              | Gorai.011G029600.1 | .                  | .                  | . |
| .            | .                  | .                  | .                  | . |
| Vv10g0022    | .                  | .                  | .                  | . |
| .            | .                  | .                  | .                  | . |
| Vv10g0023    | Tc06_g015470       | Gorai.006G088000.1 | Gorai.             | . |
| 010G155900.1 | Gorai.011G029800.1 | Gorai.010G256600.1 | .                  | . |
| .            | .                  | .                  | .                  | . |
| Vv10g0024    | Tc06_g015440       | .                  | Gorai.009G167300.1 | . |
| .            | Gorai.010G256700.1 | .                  | .                  | . |
| .            | .                  | .                  | .                  | . |
| Vv10g0025    | Tc06_g015420       | .                  | .                  | . |
| .            | .                  | .                  | .                  | . |
| Vv10g0026    | Tc06_g015410       | Gorai.006G088100.1 | .                  | . |
| .            | .                  | .                  | .                  | . |
| Vv10g0027    | .                  | .                  | .                  | . |
| .            | .                  | .                  | Vv19g0216          | . |
| Vv10g0028    | Tc06_g015400       | .                  | Gorai.009G167200.1 | . |
| .            | Gorai.010G256800.1 | Vv12g0320          | .                  | . |
| .            | .                  | .                  | .                  | . |
| Vv10g0029    | .                  | .                  | .                  | . |
| .            | .                  | .                  | .                  | . |
| Vv10g0030    | .                  | .                  | .                  | . |
| .            | .                  | .                  | .                  | . |
| Vv10g0031    | Tc06_g015350       | .                  | Gorai.009G167000.1 | . |
|              | Gorai.011G030000.1 | .                  | .                  | . |
| .            | .                  | .                  | .                  | . |
| Vv10g0032    | Tc06_g015340       | .                  | Gorai.009G166900.1 | . |
| .            | .                  | .                  | .                  | . |
| Vv10g0033    | Tc06_g015330       | .                  | Gorai.             | . |
| 011G030100.1 | .                  | .                  | .                  | . |
| .            | .                  | .                  | .                  | . |
| Vv10g0034    | Tc06_g015320       | .                  | Gorai.009G166800.1 | . |
| .            | .                  | .                  | .                  | . |
| Vv10g0035    | Tc06_g015310       | .                  | Gorai.009G166700.1 | . |
| .            | .                  | .                  | .                  | . |
| .            | .                  | .                  | .                  | . |

|                    |              |                    |                    |                    |        |
|--------------------|--------------|--------------------|--------------------|--------------------|--------|
| Vv10g0036          | Tc06_g015300 | .                  | .                  | .                  | .      |
| Gorai.010G256900.1 | .            | .                  | .                  | .                  | .      |
| .                  | .            | .                  | .                  | .                  | .      |
| Vv10g0037          | .            | .                  | .                  | .                  | Gorai. |
| 010G243500.1       | Vv12g0309    | .                  | .                  | .                  | .      |
| .                  | .            | .                  | .                  | .                  | .      |
| Vv10g0038          | Tc06_g015290 | Gorai.006G088300.1 | .                  | .                  | .      |
| Gorai.011G030200.1 | .            | .                  | .                  | .                  | .      |
| .                  | .            | .                  | .                  | .                  | .      |
| .                  | .            | .                  | .                  | .                  | .      |
| Vv10g0039          | .            | .                  | .                  | .                  | .      |
| .                  | .            | .                  | .                  | .                  | .      |
| .                  | .            | .                  | .                  | .                  | .      |
| Vv10g0040          | Tc06_g015270 | .                  | .                  | .                  | Gorai. |
| 011G030300.1       | Vv12g0308    | .                  | .                  | .                  | .      |
| .                  | .            | .                  | .                  | .                  | .      |
| .                  | .            | .                  | .                  | .                  | .      |
| Vv10g0041          | Tc06_g015260 | .                  | .                  | Gorai.009G166500.1 | .      |
| Gorai.011G030400.1 | .            | .                  | .                  | .                  | .      |
| .                  | .            | .                  | .                  | .                  | .      |
| .                  | .            | .                  | .                  | .                  | .      |
| Vv10g0042          | Tc06_g015250 | .                  | .                  | Gorai.009G166400.1 | .      |
| .                  | .            | .                  | .                  | .                  | .      |
| .                  | .            | .                  | .                  | .                  | .      |
| Vv10g0043          | Tc06_g015240 | Gorai.006G088400.1 | .                  | .                  | .      |
| Gorai.009G166300.1 | .            | Vv12g0306          | .                  | .                  | .      |
| .                  | .            | .                  | .                  | .                  | .      |
| .                  | .            | .                  | .                  | .                  | .      |
| Vv10g0044          | Tc06_g015230 | .                  | .                  | .                  | Gorai. |
| 011G030500.1       | .            | .                  | .                  | .                  | .      |
| .                  | .            | .                  | .                  | .                  | .      |
| .                  | .            | .                  | .                  | .                  | .      |
| Vv10g0045          | .            | .                  | .                  | .                  | .      |
| .                  | .            | .                  | .                  | .                  | .      |
| .                  | .            | .                  | .                  | .                  | .      |
| Vv10g0046          | Tc06_g015210 | .                  | .                  | Gorai.009G166200.1 | .      |
| Gorai.011G030700.1 | .            | .                  | .                  | .                  | .      |
| .                  | .            | .                  | .                  | .                  | .      |
| .                  | .            | .                  | .                  | .                  | .      |
| Vv10g0047          | Tc06_g015200 | Gorai.006G088500.1 | .                  | .                  | .      |
| Gorai.011G030800.1 | .            | Vv12g0302          | .                  | .                  | .      |
| .                  | .            | .                  | .                  | .                  | .      |
| .                  | .            | .                  | .                  | .                  | .      |
| Vv10g0048          | Tc06_g015190 | .                  | .                  | Gorai.009G166100.1 | .      |
| Gorai.011G030900.1 | .            | .                  | .                  | .                  | .      |
| .                  | .            | .                  | .                  | .                  | .      |
| .                  | .            | .                  | .                  | .                  | .      |
| Vv10g0049          | Tc06_g015180 | .                  | .                  | .                  | .      |
| Gorai.010G243400.1 | .            | .                  | .                  | .                  | .      |
| .                  | Vv19g0199    | Tc07_g008870       | Gorai.013G171700.1 | .                  | .      |
| .                  | .            | .                  | .                  | .                  | .      |

|                    |              |   |   |   |   |                    |   |
|--------------------|--------------|---|---|---|---|--------------------|---|
| Vv10g0050          | .            | . | . | . | . | .                  | . |
| Vv12g0289          | .            | . | . | . | . | .                  | . |
| Vv10g0051          | Tc06_g015170 | . | . | . | . | .                  | . |
| Vv12g0286          | .            | . | . | . | . | .                  | . |
| Vv10g0052          | .            | . | . | . | . | .                  | . |
| Vv10g0053          | Tc06_g015160 | . | . | . | . | .                  | . |
| Vv12g0284          | .            | . | . | . | . | .                  | . |
| Vv10g0054          | Tc06_g015150 | . | . | . | . | .                  | . |
| Vv12g0282          | .            | . | . | . | . | .                  | . |
| Vv10g0055          | Tc06_g015140 | . | . | . | . | .                  | . |
| Vv12g0277          | .            | . | . | . | . | .                  | . |
| Vv10g0056          | Tc06_g015120 | . | . | . | . | Gorai.009G165900.1 | . |
| Vv12g0275          | .            | . | . | . | . | .                  | . |
| Vv10g0057          | Tc06_g015110 | . | . | . | . | Gorai.009G165800.1 | . |
| Vv12g0274          | .            | . | . | . | . | .                  | . |
| Vv10g0058          | .            | . | . | . | . | .                  | . |
| Vv10g0059          | .            | . | . | . | . | .                  | . |
| Vv10g0060          | Tc06_g015090 | . | . | . | . | .                  | . |
| Vv10g0061          | Tc06_g015070 | . | . | . | . | Gorai.             | . |
| 011G031100.1       | .            | . | . | . | . | .                  | . |
| Vv10g0062          | .            | . | . | . | . | .                  | . |
| Vv10g0063          | Tc06_g015050 | . | . | . | . | Gorai.             | . |
| 011G031200.1       | .            | . | . | . | . | .                  | . |
| Vv10g0064          | .            | . | . | . | . | .                  | . |
| Vv10g0065          | Tc06_g015040 | . | . | . | . | Gorai.009G165700.1 | . |
| Gorai.011G031300.1 | .            | . | . | . | . | .                  | . |
| .                  | .            | . | . | . | . | .                  | . |

|                    |                    |   |           |                    |
|--------------------|--------------------|---|-----------|--------------------|
| Vv10g0066          | Tc06_g015030       | . | .         | Gorai.             |
| 011G031400.1       | Gorai.010G242900.1 | . | Vv12g0270 | .                  |
| Tc01_g040940       | .                  | . | .         | .                  |
| Vv10g0067          | Tc06_g015010       | . | .         | Gorai.009G165500.1 |
| .                  | .                  | . | .         | .                  |
| Vv10g0068          | Tc06_g015000       | . | .         | Gorai.010G156500.1 |
| Gorai.009G165400.1 | .                  | . | .         | .                  |
| .                  | .                  | . | .         | .                  |
| Vv10g0069          | Tc06_g014990       | . | .         | Gorai.009G165300.1 |
| .                  | .                  | . | .         | .                  |
| Vv10g0070          | .                  | . | .         | .                  |
| .                  | .                  | . | .         | .                  |
| Vv10g0071          | Tc06_g014980       | . | .         | Gorai.009G165200.1 |
| .                  | .                  | . | .         | .                  |
| Vv10g0072          | Tc06_g014970       | . | .         | Gorai.             |
| 011G031600.1       | .                  | . | .         | .                  |
| .                  | .                  | . | .         | .                  |
| Vv10g0073          | Tc06_g014960       | . | .         | Gorai.             |
| 011G031700.1       | .                  | . | .         | .                  |
| .                  | .                  | . | .         | .                  |
| Vv10g0074          | Tc06_g014950       | . | .         | Gorai.009G165100.1 |
| .                  | .                  | . | .         | .                  |
| Vv10g0075          | Tc06_g014940       | . | .         | Gorai.009G165000.1 |
| .                  | .                  | . | .         | .                  |
| Vv10g0076          | .                  | . | .         | Gorai.011G031800.1 |
| Gorai.010G242700.1 | .                  | . | .         | .                  |
| .                  | Vv19g0183          | . | .         | .                  |
| .                  | .                  | . | .         | .                  |
| Vv10g0077          | .                  | . | .         | .                  |
| .                  | .                  | . | .         | .                  |
| Vv10g0078          | .                  | . | .         | .                  |
| .                  | .                  | . | .         | .                  |
| Vv10g0079          | .                  | . | .         | .                  |
| .                  | .                  | . | .         | .                  |
| Vv10g0080          | Tc06_g014930       | . | .         | .                  |
| .                  | .                  | . | .         | .                  |
| .                  | .                  | . | .         | .                  |
| Vv10g0081          | Tc06_g014920       | . | .         | Gorai.009G164900.1 |

|                    |                    |                    |                    |                    |           |
|--------------------|--------------------|--------------------|--------------------|--------------------|-----------|
|                    | Gorai.011G031900.1 | .                  | .                  | .                  | .         |
|                    | .                  | .                  | Vv19g0181          | .                  | .         |
|                    | .                  | .                  | .                  | .                  | .         |
| Vv10g0082          | .                  | .                  | .                  | Gorai.011G032000.1 | .         |
|                    | .                  | .                  | .                  | .                  | .         |
|                    | Vv19g0179          | .                  | .                  | .                  | .         |
| Vv10g0083          | .                  | .                  | .                  | .                  | .         |
|                    | .                  | .                  | .                  | .                  | .         |
| Vv10g0084          | Tc06_g014910       | .                  | .                  | .                  | .         |
|                    | .                  | .                  | .                  | .                  | .         |
| Vv19g0178          | Tc07_g009220       | .                  | .                  | .                  | .         |
| Vv10g0085          | .                  | .                  | .                  | Gorai.011G032200.1 | .         |
|                    | .                  | .                  | .                  | .                  | .         |
|                    | Vv19g0176          | Tc07_g009230       | .                  | .                  | .         |
|                    | .                  | .                  | .                  | .                  | .         |
| Vv10g0086          | Tc06_g014900       | .                  | .                  | .                  | Gorai.    |
| 011G032400.1       | .                  | .                  | .                  | .                  | .         |
|                    | .                  | .                  | .                  | .                  | .         |
| Vv10g0087          | Tc06_g014890       | .                  | .                  | .                  | .         |
|                    | .                  | .                  | .                  | .                  | .         |
|                    | Vv12g0258          | .                  | .                  | .                  | .         |
|                    | Vv19g0175          | Tc07_g009250       | .                  | .                  | Gorai.    |
| 002G064800.1       | .                  | .                  | .                  | .                  | .         |
| Vv10g0088          | .                  | .                  | .                  | .                  | .         |
|                    | .                  | .                  | .                  | .                  | Vv19g0173 |
|                    | Tc07_g009270       | .                  | Gorai.002G064700.1 | .                  | .         |
|                    | Gorai.004G029900.1 | .                  | .                  | .                  | .         |
| Vv10g0089          | Tc06_g014860       | .                  | .                  | Gorai.009G164700.1 | .         |
|                    | Gorai.011G032700.1 | .                  | .                  | .                  | .         |
|                    | .                  | .                  | Vv19g0172          | Tc07_g009280       | .         |
|                    | Gorai.002G064600.1 | .                  | .                  | .                  | .         |
| Vv10g0090          | .                  | .                  | .                  | .                  | .         |
| Vv12g0255          | .                  | .                  | .                  | .                  | .         |
| Vv19g0171          | Tc07_g009290       | Gorai.013G172800.1 | .                  | .                  | .         |
| Gorai.002G064500.1 | Gorai.009G373000.1 | .                  | .                  | .                  | .         |
| Vv10g0091          | Tc06_g014850       | .                  | .                  | .                  | Gorai.    |
| 011G032800.1       | Gorai.010G242600.1 | .                  | .                  | .                  | .         |
|                    | .                  | .                  | .                  | .                  | .         |
|                    | .                  | .                  | .                  | .                  | .         |
| Vv10g0092          | Tc06_g014840       | .                  | .                  | .                  | .         |
| Gorai.010G242500.1 | .                  | .                  | .                  | .                  | .         |
|                    | .                  | .                  | .                  | .                  | .         |
| Vv10g0093          | Tc06_g014830       | .                  | .                  | .                  | Gorai.    |
| 011G032900.1       | Gorai.010G242400.1 | .                  | .                  | .                  | .         |
|                    | .                  | .                  | .                  | .                  | .         |
|                    | .                  | .                  | .                  | .                  | .         |
| Vv10g0094          | .                  | .                  | .                  | .                  | .         |
|                    | .                  | .                  | .                  | .                  | .         |
|                    | .                  | .                  | .                  | .                  | .         |
| Vv10g0095          | Tc06_g014820       | .                  | .                  | .                  | .         |



|                    |              |   |   |   |   |                    |   |
|--------------------|--------------|---|---|---|---|--------------------|---|
| .                  | .            | . | . | . | . | .                  | . |
| .                  | .            | . | . | . | . | .                  | . |
| Vv10g0096          | .            | . | . | . | . | .                  | . |
| .                  | .            | . | . | . | . | .                  | . |
| .                  | .            | . | . | . | . | .                  | . |
| Vv10g0097          | Tc06_g014810 | . | . | . | . | Gorai.             | . |
| 011G033000.1       | .            | . | . | . | . | .                  | . |
| .                  | .            | . | . | . | . | .                  | . |
| Vv10g0098          | .            | . | . | . | . | .                  | . |
| .                  | .            | . | . | . | . | .                  | . |
| .                  | .            | . | . | . | . | .                  | . |
| Vv10g0099          | .            | . | . | . | . | .                  | . |
| .                  | .            | . | . | . | . | .                  | . |
| .                  | .            | . | . | . | . | .                  | . |
| Vv10g0100          | .            | . | . | . | . | .                  | . |
| .                  | .            | . | . | . | . | .                  | . |
| .                  | .            | . | . | . | . | .                  | . |
| Vv10g0101          | .            | . | . | . | . | .                  | . |
| .                  | .            | . | . | . | . | .                  | . |
| .                  | .            | . | . | . | . | .                  | . |
| Vv10g0102          | .            | . | . | . | . | .                  | . |
| .                  | .            | . | . | . | . | .                  | . |
| .                  | .            | . | . | . | . | .                  | . |
| Vv10g0103          | Tc06_g014760 | . | . | . | . | Gorai.             | . |
| 011G033300.1       | .            | . | . | . | . | .                  | . |
| .                  | .            | . | . | . | . | .                  | . |
| Vv10g0104          | Tc06_g014750 | . | . | . | . | Gorai.009G164300.1 | . |
| .                  | .            | . | . | . | . | .                  | . |
| .                  | .            | . | . | . | . | .                  | . |
| Vv10g0105          | Tc06_g014740 | . | . | . | . | Gorai.009G164200.1 | . |
| .                  | Vv12g0251    | . | . | . | . | .                  | . |
| .                  | .            | . | . | . | . | .                  | . |
| .                  | .            | . | . | . | . | .                  | . |
| Vv10g0106          | .            | . | . | . | . | Gorai.009G164100.1 | . |
| .                  | .            | . | . | . | . | .                  | . |
| .                  | .            | . | . | . | . | .                  | . |
| Vv10g0107          | Tc06_g014730 | . | . | . | . | Gorai.             | . |
| 011G033400.1       | .            | . | . | . | . | .                  | . |
| .                  | .            | . | . | . | . | .                  | . |
| .                  | .            | . | . | . | . | .                  | . |
| Vv10g0108          | .            | . | . | . | . | .                  | . |
| .                  | .            | . | . | . | . | .                  | . |
| .                  | .            | . | . | . | . | .                  | . |
| Vv10g0109          | Tc06_g014720 | . | . | . | . | .                  | . |
| .                  | .            | . | . | . | . | .                  | . |
| Vv19g0167          | Tc07_g009370 | . | . | . | . | Gorai.002G063300.1 | . |
| Gorai.009G372600.1 | .            | . | . | . | . | Gorai.004G030200.1 | . |
| Vv10g0110          | Tc06_g014710 | . | . | . | . | .                  | . |
| .                  | .            | . | . | . | . | .                  | . |
| .                  | .            | . | . | . | . | .                  | . |
| Vv10g0111          | Tc06_g014700 | . | . | . | . | Gorai.009G164000.1 | . |

|                    |                    |                    |   |                    |   |   |   |
|--------------------|--------------------|--------------------|---|--------------------|---|---|---|
| .                  | .                  | .                  | . | .                  | . | . | . |
| .                  | .                  | .                  | . | .                  | . | . | . |
| Vv10g0112          | Tc06_g014690       | .                  | . | .                  | . | . | . |
| .                  | .                  | .                  | . | .                  | . | . | . |
| Vv10g0113          | .                  | .                  | . | .                  | . | . | . |
| .                  | .                  | .                  | . | .                  | . | . | . |
| Vv10g0114          | .                  | .                  | . | .                  | . | . | . |
| .                  | .                  | .                  | . | .                  | . | . | . |
| Vv10g0115          | .                  | .                  | . | .                  | . | . | . |
| .                  | .                  | .                  | . | .                  | . | . | . |
| Vv10g0116          | Tc06_g014640       | .                  | . | Gorai.009G163800.1 | . | . | . |
| .                  | Gorai.011G033600.1 | .                  | . | Vv12g0249          | . | . | . |
| .                  | .                  | .                  | . | .                  | . | . | . |
| .                  | .                  | .                  | . | .                  | . | . | . |
| Vv10g0117          | Tc06_g014620       | Gorai.006G088700.1 | . | Gorai.             | . | . | . |
| 010G158300.1       | .                  | Gorai.011G033700.1 | . | .                  | . | . | . |
| .                  | .                  | .                  | . | .                  | . | . | . |
| Vv10g0118          | Tc06_g014610       | .                  | . | Gorai.010G158600.1 | . | . | . |
| .                  | .                  | .                  | . | .                  | . | . | . |
| Vv10g0119          | Tc06_g014600       | Gorai.006G088800.1 | . | .                  | . | . | . |
| .                  | Gorai.011G033800.1 | Gorai.010G242200.1 | . | Vv12g0242          | . | . | . |
| .                  | Tc01_g013500       | .                  | . | .                  | . | . | . |
| Vv19g0164          | Tc07_g009400       | .                  | . | .                  | . | . | . |
| Vv10g0120          | .                  | .                  | . | .                  | . | . | . |
| .                  | .                  | .                  | . | .                  | . | . | . |
| Vv10g0121          | Tc06_g014580       | .                  | . | .                  | . | . | . |
| .                  | Vv12g0233          | .                  | . | .                  | . | . | . |
| .                  | .                  | .                  | . | .                  | . | . | . |
| Vv10g0122          | Tc06_g014560       | .                  | . | .                  | . | . | . |
| .                  | Vv12g0232          | .                  | . | .                  | . | . | . |
| .                  | .                  | .                  | . | .                  | . | . | . |
| Vv10g0123          | Tc06_g014540       | .                  | . | Gorai.010G158900.1 | . | . | . |
| .                  | .                  | .                  | . | .                  | . | . | . |
| Vv10g0124          | Tc06_g014520       | .                  | . | Gorai.010G159100.1 | . | . | . |
| Gorai.009G163600.1 | .                  | .                  | . | .                  | . | . | . |
| .                  | .                  | .                  | . | .                  | . | . | . |
| Vv10g0125          | .                  | .                  | . | .                  | . | . | . |
| .                  | .                  | .                  | . | .                  | . | . | . |
| Vv10g0126          | Tc06_g014510       | .                  | . | Gorai.009G163500.1 | . | . | . |
| .                  | .                  | .                  | . | .                  | . | . | . |

|                    |                    |                    |                    |                    |
|--------------------|--------------------|--------------------|--------------------|--------------------|
| Vv10g0127          | Tc06_g014500       | .                  | .                  | Gorai.009G163400.1 |
|                    | Gorai.011G034000.1 | .                  | .                  | .                  |
| .                  | .                  | .                  | .                  | .                  |
| Vv10g0128          | Tc06_g014490       | .                  | .                  | .                  |
| .                  | .                  | .                  | .                  | .                  |
| Vv10g0129          | .                  | Gorai.010G159200.1 | .                  | .                  |
| .                  | .                  | .                  | .                  | .                  |
| Vv10g0130          | .                  | .                  | .                  | .                  |
| .                  | .                  | .                  | .                  | .                  |
| Vv10g0131          | Tc06_g014450       | .                  | .                  | Gorai.009G163100.1 |
| .                  | Gorai.010G242000.1 | Vv12g0225          | .                  | .                  |
| Tc01_g013620       | .                  | .                  | .                  | .                  |
| .                  | .                  | .                  | .                  | .                  |
| Vv10g0132          | Tc06_g014440       | Gorai.006G088900.1 | .                  | .                  |
| Gorai.009G162900.1 | .                  | Vv12g0220          | .                  | .                  |
| Tc01_g001320       | .                  | .                  | .                  | .                  |
| .                  | .                  | .                  | .                  | .                  |
| Vv10g0133          | Tc06_g014430       | .                  | .                  | .                  |
| Gorai.010G241900.1 | .                  | .                  | .                  | .                  |
| .                  | .                  | .                  | .                  | .                  |
| Vv10g0134          | Tc06_g014420       | .                  | .                  | Gorai.009G162800.1 |
| .                  | .                  | .                  | .                  | .                  |
| .                  | Vv19g0146          | .                  | .                  | .                  |
| .                  | .                  | .                  | .                  | .                  |
| Vv10g0135          | .                  | .                  | .                  | .                  |
| .                  | .                  | .                  | .                  | .                  |
| .                  | .                  | .                  | .                  | .                  |
| Vv10g0136          | Tc06_g014410       | .                  | .                  | Gorai.009G162700.1 |
| .                  | .                  | .                  | .                  | .                  |
| .                  | .                  | .                  | .                  | .                  |
| Vv10g0137          | Tc06_g014380       | .                  | Gorai.010G159300.1 | .                  |
| Gorai.009G162500.1 | Gorai.011G040200.1 | .                  | .                  | .                  |
| .                  | .                  | .                  | .                  | .                  |
| .                  | .                  | .                  | .                  | .                  |
| Vv10g0138          | Tc06_g014370       | .                  | .                  | Gorai.009G162400.1 |
|                    | Gorai.011G040000.1 | .                  | .                  | .                  |
| .                  | .                  | .                  | .                  | .                  |
| .                  | .                  | .                  | .                  | .                  |
| Vv10g0139          | .                  | .                  | .                  | .                  |
| .                  | .                  | .                  | .                  | .                  |
| .                  | .                  | .                  | .                  | .                  |
| Vv10g0140          | Tc06_g014340       | .                  | .                  | Gorai.009G162300.1 |
|                    | Gorai.011G039700.1 | .                  | .                  | .                  |
| .                  | .                  | .                  | .                  | .                  |
| .                  | .                  | .                  | .                  | .                  |

|                    |                    |                    |                    |                    |
|--------------------|--------------------|--------------------|--------------------|--------------------|
| Vv10g0141          | Tc06_g014330       | .                  | .                  | Gorai.009G162200.1 |
|                    | Gorai.011G039600.1 | .                  | Vv12g0216          | .                  |
| .                  | .                  | .                  | .                  | .                  |
| .                  | .                  | .                  | .                  | .                  |
| Vv10g0142          | Tc06_g014320       | .                  | Gorai.010G159400.1 | .                  |
| Gorai.009G162100.1 | Gorai.011G039500.1 | .                  | .                  | .                  |
| .                  | .                  | .                  | .                  | .                  |
| .                  | .                  | .                  | .                  | .                  |
| Vv10g0143          | Tc06_g014310       | .                  | .                  | Gorai.             |
| 011G039400.1       | .                  | .                  | .                  | .                  |
| .                  | .                  | .                  | .                  | .                  |
| Vv10g0144          | Tc06_g014290       | .                  | .                  | Gorai.009G162000.1 |
| .                  | .                  | .                  | .                  | .                  |
| .                  | .                  | .                  | .                  | .                  |
| Vv10g0145          | .                  | .                  | .                  | .                  |
| .                  | .                  | .                  | .                  | .                  |
| .                  | .                  | .                  | .                  | .                  |
| Vv10g0146          | .                  | .                  | .                  | .                  |
| .                  | .                  | .                  | .                  | .                  |
| .                  | .                  | .                  | .                  | .                  |
| Vv10g0147          | Tc06_g014280       | .                  | Gorai.010G159600.1 | .                  |
| Gorai.011G034200.1 | .                  | .                  | .                  | .                  |
| .                  | .                  | .                  | .                  | .                  |
| .                  | .                  | .                  | .                  | .                  |
| Vv10g0148          | .                  | .                  | .                  | .                  |
| .                  | .                  | .                  | .                  | .                  |
| .                  | .                  | .                  | .                  | .                  |
| Vv10g0149          | Tc06_g014260       | .                  | .                  | Gorai.009G161900.1 |
| Gorai.011G039100.1 | .                  | .                  | Vv12g0212          | .                  |
| Tc01_g013820       | .                  | .                  | .                  | .                  |
| .                  | .                  | .                  | .                  | .                  |
| Vv10g0150          | Tc06_g014250       | .                  | .                  | .                  |
| .                  | .                  | .                  | .                  | .                  |
| .                  | .                  | .                  | .                  | .                  |
| Vv10g0151          | .                  | Gorai.010G159700.1 | Gorai.             | .                  |
| 009G161800.1       | Gorai.011G039000.1 | .                  | Vv12g0209          | .                  |
| .                  | .                  | .                  | .                  | .                  |
| .                  | .                  | .                  | .                  | .                  |
| Vv10g0152          | Tc06_g014230       | .                  | .                  | .                  |
| Vv12g0208          | .                  | .                  | .                  | .                  |
| .                  | .                  | .                  | .                  | .                  |
| Vv10g0153          | Tc06_g014220       | Gorai.006G089100.1 | .                  | .                  |
| .                  | Gorai.010G241800.1 | .                  | .                  | .                  |
| .                  | .                  | .                  | .                  | .                  |
| .                  | .                  | .                  | .                  | .                  |
| Vv10g0154          | Tc06_g014210       | .                  | .                  | Gorai.             |
| 011G038900.1       | .                  | .                  | .                  | .                  |
| .                  | Vv19g0126          | .                  | .                  | .                  |
| .                  | .                  | .                  | .                  | .                  |
| Vv10g0155          | Tc06_g014190       | Gorai.006G089200.1 | Gorai.             | .                  |

|                    |                    |                    |        |                    |        |   |   |
|--------------------|--------------------|--------------------|--------|--------------------|--------|---|---|
| 010G159800.1       | .                  | .                  | .      | .                  | .      | . | . |
| .                  | .                  | .                  | .      | .                  | .      | . | . |
| .                  | .                  | .                  | .      | .                  | .      | . | . |
| Vv10g0156          | Tc06_g014180       | .                  | .      | Gorai.009G161600.1 | .      | . | . |
| .                  | Gorai.010G241700.1 | .                  | .      | .                  | .      | . | . |
| .                  | .                  | .                  | .      | .                  | .      | . | . |
| .                  | .                  | .                  | .      | .                  | .      | . | . |
| Vv10g0157          | .                  | .                  | .      | .                  | .      | . | . |
| .                  | .                  | .                  | .      | .                  | .      | . | . |
| .                  | .                  | .                  | .      | .                  | .      | . | . |
| Vv10g0158          | Tc06_g014170       | .                  | .      | Gorai.010G160000.1 | .      | . | . |
| .                  | .                  | .                  | .      | .                  | .      | . | . |
| .                  | .                  | .                  | .      | .                  | .      | . | . |
| Vv10g0159          | .                  | .                  | .      | .                  | .      | . | . |
| .                  | .                  | .                  | .      | .                  | .      | . | . |
| .                  | .                  | .                  | .      | .                  | .      | . | . |
| Vv10g0160          | Tc06_g014160       | .                  | .      | .                  | Gorai. | . | . |
| 011G038700.1       | .                  | .                  | .      | .                  | .      | . | . |
| .                  | .                  | .                  | .      | .                  | .      | . | . |
| .                  | .                  | .                  | .      | .                  | .      | . | . |
| Vv10g0161          | Tc06_g014150       | .                  | .      | Gorai.009G161500.1 | .      | . | . |
| Gorai.011G038600.1 | .                  | .                  | .      | .                  | .      | . | . |
| .                  | .                  | .                  | .      | .                  | .      | . | . |
| .                  | .                  | .                  | .      | .                  | .      | . | . |
| Vv10g0162          | Tc06_g014140       | .                  | .      | Gorai.009G161400.1 | .      | . | . |
| .                  | .                  | .                  | .      | .                  | .      | . | . |
| .                  | .                  | .                  | .      | .                  | .      | . | . |
| Vv10g0163          | .                  | .                  | .      | .                  | .      | . | . |
| .                  | .                  | .                  | .      | .                  | .      | . | . |
| .                  | .                  | .                  | .      | .                  | .      | . | . |
| Vv10g0164          | .                  | .                  | .      | .                  | .      | . | . |
| .                  | .                  | .                  | .      | .                  | .      | . | . |
| .                  | .                  | .                  | .      | .                  | .      | . | . |
| Vv10g0165          | Tc06_g014120       | Gorai.006G089400.1 | .      | .                  | .      | . | . |
| .                  | Gorai.010G241600.1 | .                  | .      | .                  | .      | . | . |
| .                  | .                  | .                  | .      | .                  | .      | . | . |
| .                  | .                  | .                  | .      | .                  | .      | . | . |
| Vv10g0166          | Tc06_g014110       | .                  | .      | .                  | .      | . | . |
| .                  | .                  | .                  | .      | .                  | .      | . | . |
| .                  | .                  | .                  | .      | .                  | .      | . | . |
| Vv10g0167          | Tc06_g014100       | Gorai.006G089600.1 | .      | .                  | .      | . | . |
| Gorai.011G038300.1 | .                  | Gorai.010G241500.1 | .      | .                  | .      | . | . |
| .                  | .                  | .                  | .      | .                  | .      | . | . |
| .                  | .                  | .                  | .      | .                  | .      | . | . |
| Vv10g0168          | .                  | .                  | .      | .                  | .      | . | . |
| .                  | .                  | .                  | .      | .                  | .      | . | . |
| .                  | .                  | .                  | .      | .                  | .      | . | . |
| Vv10g0169          | Tc06_g014090       | Gorai.006G089700.1 | Gorai. | .                  | .      | . | . |
| 010G160100.1       | Gorai.009G161300.1 | Gorai.011G038200.1 | .      | .                  | .      | . | . |
| Gorai.010G241400.1 | Vv12g0178          | .                  | .      | .                  | .      | . | . |
| .                  | .                  | .                  | .      | .                  | .      | . | . |
| .                  | .                  | .                  | .      | .                  | .      | . | . |

|                    |                    |   |                    |   |
|--------------------|--------------------|---|--------------------|---|
| Vv10g0170          | Tc06_g014080       | . | Gorai.010G160200.1 | . |
| .                  | .                  | . | .                  | . |
| Vv10g0171          | Tc06_g014070       | . | .                  | . |
| .                  | .                  | . | .                  | . |
| Vv10g0172          | Tc06_g014060       | . | Gorai.010G160400.1 | . |
| Gorai.011G038000.1 | .                  | . | .                  | . |
| .                  | .                  | . | .                  | . |
| Vv10g0173          | Tc06_g014050       | . | Gorai.009G161200.1 | . |
| .                  | .                  | . | .                  | . |
| Vv10g0174          | Tc06_g014040       | . | Gorai.             | . |
| 011G037800.1       | .                  | . | .                  | . |
| .                  | .                  | . | .                  | . |
| Vv10g0175          | Tc06_g014020       | . | Gorai.010G160700.1 | . |
| Gorai.009G161100.1 | .                  | . | Vv12g0172          | . |
| .                  | .                  | . | .                  | . |
| .                  | .                  | . | .                  | . |
| Vv10g0176          | Tc06_g014000       | . | Gorai.010G160900.1 | . |
| Gorai.009G160900.1 | Gorai.011G037600.1 | . | .                  | . |
| .                  | .                  | . | .                  | . |
| .                  | .                  | . | .                  | . |
| Vv10g0177          | .                  | . | .                  | . |
| .                  | .                  | . | .                  | . |
| .                  | .                  | . | .                  | . |
| Vv10g0178          | Tc06_g013990       | . | Gorai.010G161000.1 | . |
| Gorai.009G160800.1 | Gorai.011G037500.1 | . | Vv12g0170          | . |
| Tc01_g014750       | .                  | . | .                  | . |
| .                  | .                  | . | .                  | . |
| Vv10g0179          | Tc06_g013980       | . | Gorai.009G160700.1 | . |
| .                  | Gorai.010G241300.1 | . | .                  | . |
| .                  | .                  | . | .                  | . |
| .                  | .                  | . | .                  | . |
| Vv10g0180          | Tc06_g013960       | . | Gorai.010G161300.1 | . |
| Gorai.009G160600.1 | .                  | . | .                  | . |
| .                  | .                  | . | .                  | . |
| .                  | .                  | . | .                  | . |
| Vv10g0181          | Tc06_g013950       | . | Gorai.010G161400.1 | . |
| .                  | .                  | . | .                  | . |
| .                  | .                  | . | .                  | . |
| Vv10g0182          | Tc06_g013910       | . | Gorai.             | . |
| 011G037100.1       | .                  | . | .                  | . |
| .                  | .                  | . | .                  | . |
| .                  | .                  | . | .                  | . |
| Vv10g0183          | Tc06_g013530       | . | Gorai.009G160400.1 | . |
| Gorai.011G037000.1 | Gorai.010G241200.1 | . | Vv12g0169          | . |
| .                  | .                  | . | .                  | . |
| .                  | .                  | . | .                  | . |

|                    |                    |                    |   |                    |        |   |
|--------------------|--------------------|--------------------|---|--------------------|--------|---|
| Vv10g0184          | .                  | .                  | . | Gorai.009G160300.1 | .      | . |
| Gorai.011G036900.1 | .                  | Gorai.010G241100.1 | . | .                  | .      | . |
| .                  | .                  | .                  | . | Vv19g0109          | .      | . |
| .                  | Gorai.002G050200.1 | .                  | . | .                  | .      | . |
| Vv10g0185          | .                  | .                  | . | Gorai.009G160100.1 | .      | . |
| Gorai.011G036800.1 | .                  | .                  | . | .                  | .      | . |
| .                  | .                  | .                  | . | .                  | .      | . |
| Vv10g0186          | .                  | .                  | . | Gorai.009G160000.1 | .      | . |
| Gorai.011G036700.1 | .                  | .                  | . | .                  | .      | . |
| .                  | .                  | Vv19g0105          | . | .                  | .      | . |
| Gorai.002G050900.1 | .                  | .                  | . | .                  | .      | . |
| Vv10g0187          | .                  | Gorai.006G089800.1 | . | .                  | .      | . |
| Gorai.011G036600.1 | .                  | Gorai.010G240900.1 | . | .                  | .      | . |
| .                  | .                  | .                  | . | .                  | .      | . |
| .                  | .                  | .                  | . | .                  | .      | . |
| Vv10g0188          | .                  | Gorai.006G089900.1 | . | Gorai.010G161700.1 | .      | . |
| .                  | Gorai.011G036500.1 | .                  | . | .                  | .      | . |
| .                  | .                  | .                  | . | .                  | .      | . |
| Vv10g0189          | .                  | .                  | . | .                  | .      | . |
| .                  | .                  | .                  | . | .                  | .      | . |
| .                  | .                  | .                  | . | .                  | .      | . |
| Vv10g0190          | .                  | .                  | . | .                  | .      | . |
| .                  | .                  | .                  | . | .                  | .      | . |
| .                  | .                  | .                  | . | .                  | .      | . |
| Vv10g0191          | .                  | .                  | . | .                  | .      | . |
| .                  | .                  | .                  | . | .                  | .      | . |
| .                  | .                  | .                  | . | .                  | .      | . |
| Vv10g0192          | .                  | .                  | . | Gorai.011G036400.1 | .      | . |
| Gorai.010G240800.1 | .                  | Vv12g0142          | . | .                  | .      | . |
| .                  | .                  | .                  | . | .                  | .      | . |
| Vv10g0193          | .                  | .                  | . | .                  | .      | . |
| .                  | .                  | .                  | . | .                  | .      | . |
| .                  | .                  | .                  | . | .                  | .      | . |
| Vv10g0194          | .                  | .                  | . | Gorai.011G036300.1 | .      | . |
| Gorai.010G240700.1 | .                  | Vv19g0089          | . | .                  | .      | . |
| Gorai.002G052400.1 | .                  | .                  | . | .                  | .      | . |
| .                  | .                  | .                  | . | .                  | .      | . |
| Vv10g0195          | .                  | .                  | . | Gorai.011G036200.1 | .      | . |
| Gorai.010G240600.1 | .                  | Vv19g0088          | . | .                  | .      | . |
| Gorai.002G052500.1 | .                  | .                  | . | .                  | .      | . |
| .                  | .                  | .                  | . | .                  | .      | . |
| Vv10g0196          | .                  | .                  | . | .                  | Gorai. | . |
| 010G240500.1       | .                  | .                  | . | .                  | .      | . |
| .                  | .                  | .                  | . | .                  | .      | . |
| Vv10g0197          | Tc06_g013270       | .                  | . | Gorai.010G162300.1 | .      | . |
| Gorai.011G036000.1 | .                  | .                  | . | .                  | .      | . |
| .                  | .                  | .                  | . | .                  | .      | . |

|                    |              |   |                    |   |                    |   |
|--------------------|--------------|---|--------------------|---|--------------------|---|
| Vv10g0198          | .            | . | Gorai.010G162400.1 | . | .                  | . |
| Gorai.011G035800.1 | .            | . | Gorai.010G240400.1 | . | .                  | . |
| .                  | .            | . | .                  | . | .                  | . |
| Vv10g0199          | .            | . | .                  | . | Gorai.011G035700.1 | . |
| Gorai.010G240300.1 | .            | . | Vv19g0086          | . | .                  | . |
| .                  | .            | . | .                  | . | .                  | . |
| Vv10g0200          | .            | . | .                  | . | .                  | . |
| .                  | .            | . | .                  | . | .                  | . |
| Vv10g0201          | .            | . | .                  | . | .                  | . |
| .                  | .            | . | .                  | . | .                  | . |
| Vv10g0202          | .            | . | .                  | . | .                  | . |
| .                  | .            | . | .                  | . | .                  | . |
| Vv10g0203          | .            | . | .                  | . | .                  | . |
| .                  | .            | . | .                  | . | .                  | . |
| Vv10g0204          | .            | . | .                  | . | .                  | . |
| .                  | .            | . | .                  | . | .                  | . |
| Vv10g0205          | .            | . | .                  | . | .                  | . |
| .                  | .            | . | .                  | . | .                  | . |
| Vv10g0206          | Tc06_g013030 | . | .                  | . | .                  | . |
| .                  | .            | . | .                  | . | .                  | . |
| Vv10g0207          | .            | . | .                  | . | .                  | . |
| .                  | .            | . | .                  | . | .                  | . |
| Vv10g0208          | .            | . | .                  | . | .                  | . |
| .                  | .            | . | .                  | . | .                  | . |
| Vv10g0209          | .            | . | .                  | . | .                  | . |
| .                  | .            | . | .                  | . | .                  | . |
| Vv10g0210          | .            | . | .                  | . | .                  | . |
| .                  | .            | . | .                  | . | .                  | . |
| Vv10g0211          | .            | . | .                  | . | .                  | . |
| .                  | .            | . | .                  | . | .                  | . |
| Vv10g0212          | .            | . | .                  | . | .                  | . |
| .                  | .            | . | .                  | . | .                  | . |
| Vv10g0213          | .            | . | .                  | . | .                  | . |
| .                  | .            | . | .                  | . | .                  | . |



|                    |              |   |                    |                    |                    |   |   |
|--------------------|--------------|---|--------------------|--------------------|--------------------|---|---|
| Vv10g0214          | .            | . | .                  | .                  | .                  | . | . |
| .                  | .            | . | .                  | .                  | .                  | . | . |
| Vv10g0215          | .            | . | .                  | .                  | .                  | . | . |
| .                  | .            | . | .                  | .                  | .                  | . | . |
| Vv10g0216          | .            | . | .                  | .                  | .                  | . | . |
| .                  | .            | . | .                  | .                  | .                  | . | . |
| Vv10g0217          | .            | . | .                  | .                  | .                  | . | . |
| .                  | .            | . | .                  | .                  | .                  | . | . |
| Vv10g0218          | .            | . | .                  | .                  | .                  | . | . |
| .                  | .            | . | .                  | .                  | .                  | . | . |
| Vv10g0219          | .            | . | .                  | .                  | Gorai.009G159000.1 | . | . |
| Gorai.011G032700.1 | .            | . | Gorai.010G237400.1 | .                  | .                  | . | . |
| .                  | .            | . | .                  | .                  | .                  | . | . |
| Vv10g0220          | .            | . | .                  | .                  | .                  | . | . |
| .                  | .            | . | .                  | .                  | .                  | . | . |
| Vv10g0221          | .            | . | .                  | .                  | .                  | . | . |
| .                  | .            | . | .                  | .                  | .                  | . | . |
| Vv10g0222          | .            | . | .                  | Gorai.010G163400.1 | .                  | . | . |
| .                  | .            | . | .                  | .                  | .                  | . | . |
| Vv10g0223          | .            | . | .                  | Gorai.010G163600.1 | .                  | . | . |
| .                  | .            | . | .                  | .                  | .                  | . | . |
| Vv10g0224          | .            | . | .                  | .                  | .                  | . | . |
| .                  | .            | . | .                  | .                  | .                  | . | . |
| Vv10g0225          | .            | . | .                  | .                  | .                  | . | . |
| .                  | .            | . | .                  | .                  | .                  | . | . |
| Vv10g0226          | .            | . | .                  | .                  | .                  | . | . |
| .                  | .            | . | .                  | .                  | .                  | . | . |
| Vv10g0227          | .            | . | .                  | .                  | .                  | . | . |
| .                  | .            | . | .                  | .                  | .                  | . | . |
| Vv10g0228          | .            | . | .                  | .                  | .                  | . | . |
| .                  | .            | . | .                  | .                  | .                  | . | . |
| Vv10g0229          | Tc06_g012640 | . | .                  | .                  | Gorai.             | . | . |
| 011G043800.1       | .            | . | .                  | .                  | .                  | . | . |
| .                  | .            | . | .                  | .                  | .                  | . | . |

|                    |              |   |   |                    |   |   |   |
|--------------------|--------------|---|---|--------------------|---|---|---|
| Vv10g0230          | .            | . | . | .                  | . | . | . |
| .                  | .            | . | . | .                  | . | . | . |
| Vv10g0231          | Tc06_g012630 | . | . | Gorai.010G166700.1 | . | . | . |
| Gorai.011G044200.1 | .            | . | . | .                  | . | . | . |
| .                  | .            | . | . | .                  | . | . | . |
| Vv10g0232          | Tc06_g012620 | . | . | Gorai.009G154900.1 | . | . | . |
| Gorai.011G044400.1 | .            | . | . | .                  | . | . | . |
| .                  | .            | . | . | .                  | . | . | . |
| Vv10g0233          | .            | . | . | .                  | . | . | . |
| .                  | .            | . | . | .                  | . | . | . |
| Vv10g0234          | .            | . | . | .                  | . | . | . |
| Vv09g1177          | .            | . | . | .                  | . | . | . |
| .                  | .            | . | . | .                  | . | . | . |
| Vv10g0235          | .            | . | . | Gorai.011G044500.1 | . | . | . |
| .                  | .            | . | . | .                  | . | . | . |
| .                  | .            | . | . | .                  | . | . | . |
| Vv10g0236          | .            | . | . | .                  | . | . | . |
| .                  | .            | . | . | .                  | . | . | . |
| Vv10g0237          | .            | . | . | .                  | . | . | . |
| Vv09g1176          | .            | . | . | .                  | . | . | . |
| .                  | .            | . | . | .                  | . | . | . |
| Vv10g0238          | .            | . | . | .                  | . | . | . |
| .                  | .            | . | . | .                  | . | . | . |
| .                  | .            | . | . | .                  | . | . | . |
| Vv10g0239          | .            | . | . | .                  | . | . | . |
| Vv09g1174          | .            | . | . | .                  | . | . | . |
| .                  | .            | . | . | .                  | . | . | . |
| Vv10g0240          | .            | . | . | .                  | . | . | . |
| Vv09g1172          | .            | . | . | .                  | . | . | . |
| .                  | .            | . | . | .                  | . | . | . |
| Vv10g0241          | .            | . | . | .                  | . | . | . |
| Vv09g1169          | .            | . | . | .                  | . | . | . |
| .                  | .            | . | . | .                  | . | . | . |
| Vv10g0242          | .            | . | . | .                  | . | . | . |
| .                  | .            | . | . | .                  | . | . | . |
| .                  | .            | . | . | .                  | . | . | . |
| Vv10g0243          | .            | . | . | .                  | . | . | . |
| .                  | .            | . | . | .                  | . | . | . |
| .                  | .            | . | . | .                  | . | . | . |
| Vv10g0244          | .            | . | . | .                  | . | . | . |
| .                  | .            | . | . | .                  | . | . | . |
| .                  | .            | . | . | .                  | . | . | . |
| Vv10g0245          | .            | . | . | .                  | . | . | . |
| .                  | .            | . | . | .                  | . | . | . |
| .                  | .            | . | . | .                  | . | . | . |

|                    |                    |                    |   |                    |   |                    |   |
|--------------------|--------------------|--------------------|---|--------------------|---|--------------------|---|
| Vv10g0246          | .                  | .                  | . | .                  | . | .                  | . |
| .                  | .                  | .                  | . | .                  | . | .                  | . |
| Vv10g0247          | .                  | .                  | . | .                  | . | .                  | . |
| .                  | .                  | .                  | . | .                  | . | .                  | . |
| Vv10g0248          | Tc06_g012600       | .                  | . | .                  | . | .                  | . |
| Vv09g1164          | .                  | .                  | . | .                  | . | .                  | . |
| .                  | .                  | .                  | . | .                  | . | .                  | . |
| Vv10g0249          | .                  | .                  | . | .                  | . | .                  | . |
| Vv09g1132          | .                  | .                  | . | .                  | . | .                  | . |
| .                  | .                  | .                  | . | .                  | . | .                  | . |
| Vv10g0250          | Tc06_g012590       | .                  | . | .                  | . | Gorai.             | . |
| 011G044600.1       | .                  | .                  | . | .                  | . | .                  | . |
| .                  | .                  | .                  | . | .                  | . | .                  | . |
| Vv10g0251          | Tc06_g012580       | .                  | . | .                  | . | Gorai.009G154800.1 | . |
| Gorai.011G044700.1 | .                  | .                  | . | .                  | . | .                  | . |
| .                  | .                  | .                  | . | .                  | . | .                  | . |
| Vv10g0252          | .                  | .                  | . | .                  | . | .                  | . |
| .                  | .                  | .                  | . | .                  | . | .                  | . |
| Vv10g0253          | .                  | .                  | . | .                  | . | .                  | . |
| .                  | .                  | .                  | . | .                  | . | .                  | . |
| Vv10g0254          | .                  | .                  | . | .                  | . | .                  | . |
| .                  | .                  | .                  | . | .                  | . | .                  | . |
| Vv10g0255          | Tc06_g012540       | .                  | . | .                  | . | Gorai.             | . |
| 011G044900.1       | .                  | .                  | . | .                  | . | .                  | . |
| .                  | .                  | .                  | . | .                  | . | .                  | . |
| Vv10g0256          | Tc06_g012530       | .                  | . | .                  | . | .                  | . |
| .                  | .                  | .                  | . | .                  | . | .                  | . |
| Vv10g0257          | Tc06_g012520       | Gorai.006G092600.1 | . | .                  | . | .                  | . |
| Gorai.011G045000.1 | .                  | .                  | . | .                  | . | .                  | . |
| .                  | .                  | .                  | . | .                  | . | .                  | . |
| Vv10g0258          | Tc06_g012500       | .                  | . | Gorai.010G166900.1 | . | .                  | . |
| Gorai.009G154600.1 | Gorai.011G045200.1 | .                  | . | .                  | . | .                  | . |
| .                  | .                  | .                  | . | .                  | . | .                  | . |
| Vv10g0259          | .                  | .                  | . | .                  | . | .                  | . |
| .                  | .                  | .                  | . | .                  | . | .                  | . |
| Vv10g0260          | Tc06_g012490       | .                  | . | Gorai.010G167000.1 | . | .                  | . |
| Gorai.009G154500.1 | .                  | .                  | . | .                  | . | .                  | . |
| .                  | .                  | .                  | . | .                  | . | .                  | . |
| Vv10g0261          | .                  | .                  | . | Gorai.009G154400.1 | . | .                  | . |

|                    |              |                    |        |   |                    |   |   |
|--------------------|--------------|--------------------|--------|---|--------------------|---|---|
| .                  | .            | .                  | .      | . | .                  | . | . |
| .                  | .            | .                  | .      | . | .                  | . | . |
| Vv10g0262          | .            | Gorai.006G092400.1 | .      | . | Gorai.             | . | . |
| 009G154300.1       | .            | .                  | .      | . | .                  | . | . |
| .                  | .            | .                  | .      | . | .                  | . | . |
| Vv10g0263          | Tc06_g012480 | .                  | .      | . | .                  | . | . |
| .                  | .            | .                  | .      | . | .                  | . | . |
| Vv10g0264          | .            | .                  | .      | . | .                  | . | . |
| .                  | .            | .                  | .      | . | .                  | . | . |
| Vv10g0265          | .            | .                  | .      | . | Gorai.011G045300.1 | . | . |
| .                  | .            | .                  | .      | . | .                  | . | . |
| Vv10g0266          | Tc06_g012460 | .                  | .      | . | .                  | . | . |
| .                  | .            | .                  | .      | . | .                  | . | . |
| Vv10g0267          | .            | .                  | .      | . | .                  | . | . |
| .                  | .            | .                  | .      | . | .                  | . | . |
| Vv10g0268          | .            | .                  | .      | . | .                  | . | . |
| .                  | .            | .                  | .      | . | .                  | . | . |
| Vv10g0269          | Tc06_g012450 | Gorai.006G092300.1 | .      | . | .                  | . | . |
| Gorai.009G154200.1 | .            | .                  | .      | . | .                  | . | . |
| .                  | .            | .                  | .      | . | .                  | . | . |
| Vv10g0270          | Tc06_g012440 | .                  | .      | . | Gorai.             | . | . |
| 011G045500.1       | .            | .                  | .      | . | .                  | . | . |
| .                  | .            | .                  | .      | . | .                  | . | . |
| Vv10g0271          | Tc06_g012410 | .                  | .      | . | Gorai.             | . | . |
| 011G045700.1       | .            | .                  | .      | . | .                  | . | . |
| .                  | .            | .                  | .      | . | .                  | . | . |
| Vv10g0272          | .            | .                  | .      | . | .                  | . | . |
| .                  | .            | .                  | .      | . | .                  | . | . |
| Vv10g0273          | .            | .                  | .      | . | .                  | . | . |
| .                  | .            | .                  | .      | . | .                  | . | . |
| Vv10g0274          | Tc06_g012390 | Gorai.006G092200.1 | .      | . | .                  | . | . |
| .                  | .            | .                  | .      | . | .                  | . | . |
| Vv10g0275          | Tc06_g012380 | Gorai.006G089600.1 | Gorai. | . | .                  | . | . |
| 010G167200.1       | .            | .                  | .      | . | .                  | . | . |
| .                  | .            | .                  | .      | . | .                  | . | . |
| Vv10g0276          | .            | .                  | .      | . | .                  | . | . |
| .                  | .            | .                  | .      | . | .                  | . | . |
| .                  | .            | .                  | .      | . | .                  | . | . |

|                    |                    |   |                    |
|--------------------|--------------------|---|--------------------|
| Vv10g0277          | Tc06_g012370       | . | Gorai.010G167400.1 |
| Gorai.009G154000.1 | Gorai.011G045900.1 | . | Gorai.010G238100.1 |
| .                  | .                  | . | .                  |
| .                  | .                  | . | .                  |
| Vv10g0278          | Tc06_g012360       | . | Gorai.009G153900.1 |
| Gorai.011G046000.1 | .                  | . | .                  |
| .                  | .                  | . | .                  |
| .                  | .                  | . | .                  |
| Vv10g0279          | Tc06_g012350       | . | Gorai.009G153800.1 |
| Gorai.011G046200.1 | .                  | . | .                  |
| .                  | .                  | . | .                  |
| .                  | .                  | . | .                  |
| Vv10g0280          | Tc06_g012340       | . | Gorai.009G153700.1 |
| Gorai.011G046300.1 | .                  | . | .                  |
| .                  | .                  | . | .                  |
| .                  | .                  | . | .                  |
| Vv10g0281          | Tc06_g012320       | . | Gorai.009G153500.1 |
| Gorai.011G046400.1 | .                  | . | .                  |
| .                  | .                  | . | .                  |
| .                  | .                  | . | .                  |
| Vv10g0282          | Tc06_g012310       | . | Gorai.010G167600.1 |
| Gorai.009G153400.1 | .                  | . | .                  |
| .                  | .                  | . | .                  |
| .                  | .                  | . | .                  |
| Vv10g0283          | Tc06_g012300       | . | Gorai.             |
| 011G046500.1       | Gorai.010G238000.1 | . | .                  |
| .                  | .                  | . | .                  |
| .                  | .                  | . | .                  |
| Vv10g0284          | .                  | . | .                  |
| .                  | .                  | . | .                  |
| .                  | .                  | . | .                  |
| Vv10g0285          | Tc06_g012280       | . | Gorai.             |
| 011G046700.1       | .                  | . | .                  |
| .                  | .                  | . | .                  |
| .                  | .                  | . | .                  |
| Vv10g0286          | Tc06_g012270       | . | Gorai.             |
| 011G047100.1       | Gorai.010G237900.1 | . | .                  |
| .                  | .                  | . | .                  |
| .                  | .                  | . | .                  |
| Vv10g0287          | Tc06_g012220       | . | Gorai.009G153000.1 |
| .                  | .                  | . | .                  |
| .                  | .                  | . | .                  |
| .                  | .                  | . | .                  |
| Vv10g0288          | .                  | . | .                  |
| .                  | .                  | . | .                  |
| .                  | .                  | . | .                  |
| Vv10g0289          | Tc06_g012200       | . | Gorai.010G168100.1 |
| Gorai.011G047700.1 | .                  | . | .                  |
| .                  | .                  | . | .                  |
| .                  | .                  | . | .                  |
| Vv10g0290          | .                  | . | .                  |
| .                  | .                  | . | .                  |

|                    |                    |   |                    |        |
|--------------------|--------------------|---|--------------------|--------|
| Vv10g0291          | Tc06_g012190       | . | Gorai.010G168200.1 | .      |
|                    | Gorai.011G047800.1 | . | .                  | .      |
| .                  | .                  | . | .                  | .      |
| Vv10g0292          | Tc06_g012180       | . | .                  | Gorai. |
| 011G047900.1       | Gorai.010G237700.1 | . | .                  | .      |
| .                  | .                  | . | .                  | .      |
| Vv10g0293          | Tc06_g012160       | . | Gorai.009G152900.1 | .      |
| .                  | Gorai.010G237600.1 | . | .                  | .      |
| .                  | .                  | . | .                  | .      |
| Vv10g0294          | Tc06_g012150       | . | .                  | Gorai. |
| 011G048000.1       | .                  | . | .                  | .      |
| .                  | .                  | . | .                  | .      |
| Vv10g0295          | Tc06_g012140       | . | .                  | .      |
| .                  | .                  | . | .                  | .      |
| .                  | .                  | . | .                  | .      |
| Vv10g0296          | Tc06_g012130       | . | Gorai.010G168300.1 | .      |
| .                  | Gorai.010G237500.1 | . | .                  | .      |
| .                  | .                  | . | .                  | .      |
| Vv10g0297          | Tc06_g012120       | . | .                  | .      |
| Gorai.010G237400.1 | .                  | . | .                  | .      |
| .                  | .                  | . | .                  | .      |
| Vv10g0298          | Tc06_g012110       | . | Gorai.009G152800.1 | .      |
| Gorai.011G048100.1 | .                  | . | .                  | .      |
| .                  | .                  | . | .                  | .      |
| Vv10g0299          | Tc06_g012100       | . | Gorai.009G152700.1 | .      |
| Gorai.011G048200.1 | .                  | . | .                  | .      |
| .                  | .                  | . | .                  | .      |
| Vv10g0300          | Tc06_g012090       | . | Gorai.009G152600.1 | .      |
| .                  | .                  | . | .                  | .      |
| .                  | .                  | . | .                  | .      |
| Vv10g0301          | .                  | . | .                  | .      |
| .                  | .                  | . | .                  | .      |
| .                  | .                  | . | .                  | .      |
| Vv10g0302          | Tc06_g012080       | . | .                  | Gorai. |
| 011G048300.1       | .                  | . | .                  | .      |
| .                  | .                  | . | .                  | .      |
| Vv10g0303          | .                  | . | .                  | .      |
| .                  | .                  | . | .                  | .      |
| Vv10g0304          | .                  | . | .                  | .      |
| .                  | .                  | . | .                  | .      |
| .                  | .                  | . | .                  | .      |
| Vv10g0305          | .                  | . | .                  | .      |

|                    |              |   |                    |                    |   |   |   |
|--------------------|--------------|---|--------------------|--------------------|---|---|---|
| .                  | .            | . | .                  | .                  | . | . | . |
| .                  | .            | . | .                  | .                  | . | . | . |
| Vv10g0306          | .            | . | .                  | .                  | . | . | . |
| .                  | .            | . | .                  | .                  | . | . | . |
| .                  | .            | . | .                  | .                  | . | . | . |
| Vv10g0307          | Tc06_g012070 | . | .                  | Gorai.010G168400.1 | . | . | . |
| Gorai.009G152500.1 | .            | . | Gorai.010G234500.1 | .                  | . | . | . |
| .                  | .            | . | .                  | .                  | . | . | . |
| .                  | .            | . | .                  | .                  | . | . | . |
| Vv10g0308          | .            | . | .                  | .                  | . | . | . |
| .                  | .            | . | .                  | .                  | . | . | . |
| .                  | .            | . | .                  | .                  | . | . | . |
| Vv10g0309          | Tc06_g012060 | . | .                  | .                  | . | . | . |
| .                  | .            | . | .                  | .                  | . | . | . |
| .                  | .            | . | .                  | .                  | . | . | . |
| Vv10g0310          | Tc06_g012050 | . | .                  | Gorai.009G152400.1 | . | . | . |
| Gorai.011G048400.1 | .            | . | .                  | .                  | . | . | . |
| .                  | .            | . | .                  | .                  | . | . | . |
| .                  | .            | . | .                  | .                  | . | . | . |
| Vv10g0311          | .            | . | .                  | .                  | . | . | . |
| .                  | .            | . | .                  | .                  | . | . | . |
| .                  | .            | . | .                  | .                  | . | . | . |
| Vv10g0312          | .            | . | .                  | .                  | . | . | . |
| .                  | .            | . | .                  | .                  | . | . | . |
| .                  | .            | . | .                  | .                  | . | . | . |
| Vv10g0313          | .            | . | .                  | .                  | . | . | . |
| .                  | .            | . | .                  | .                  | . | . | . |
| .                  | .            | . | .                  | .                  | . | . | . |
| Vv10g0314          | .            | . | .                  | .                  | . | . | . |
| .                  | .            | . | .                  | .                  | . | . | . |
| .                  | .            | . | .                  | .                  | . | . | . |
| Vv10g0315          | .            | . | .                  | .                  | . | . | . |
| .                  | .            | . | .                  | .                  | . | . | . |
| .                  | .            | . | .                  | .                  | . | . | . |
| Vv10g0316          | .            | . | .                  | .                  | . | . | . |
| .                  | .            | . | .                  | .                  | . | . | . |
| .                  | .            | . | .                  | .                  | . | . | . |
| Vv10g0317          | .            | . | .                  | .                  | . | . | . |
| .                  | .            | . | .                  | .                  | . | . | . |
| .                  | .            | . | .                  | .                  | . | . | . |
| Vv10g0318          | .            | . | .                  | .                  | . | . | . |
| .                  | .            | . | .                  | .                  | . | . | . |
| .                  | .            | . | .                  | .                  | . | . | . |
| Vv10g0319          | Tc06_g002530 | . | .                  | .                  | . | . | . |
| .                  | .            | . | .                  | .                  | . | . | . |
| .                  | .            | . | .                  | .                  | . | . | . |
| Vv10g0320          | .            | . | .                  | .                  | . | . | . |
| .                  | .            | . | .                  | .                  | . | . | . |
| .                  | .            | . | .                  | .                  | . | . | . |
| Vv10g0321          | .            | . | .                  | .                  | . | . | . |

|           |              |  |  |  |                    |  |
|-----------|--------------|--|--|--|--------------------|--|
| Vv10g0322 |              |  |  |  |                    |  |
| Vv10g0323 |              |  |  |  |                    |  |
| Vv10g0324 |              |  |  |  |                    |  |
| Vv10g0325 |              |  |  |  |                    |  |
| Vv10g0326 | Tc06_g002590 |  |  |  | Gorai.009G117800.1 |  |
| Vv10g0327 | Tc06_g011990 |  |  |  | Gorai.009G151900.1 |  |
| Vv10g0328 |              |  |  |  |                    |  |
| Vv10g0329 |              |  |  |  |                    |  |
| Vv10g0330 |              |  |  |  |                    |  |
| Vv10g0331 |              |  |  |  |                    |  |
| Vv10g0332 |              |  |  |  |                    |  |
| Vv10g0333 |              |  |  |  |                    |  |
| Vv10g0334 |              |  |  |  |                    |  |
| Vv10g0335 |              |  |  |  |                    |  |
| Vv10g0336 |              |  |  |  |                    |  |
| Vv10g0337 |              |  |  |  |                    |  |



|           |              |   |   |   |   |   |   |
|-----------|--------------|---|---|---|---|---|---|
| Vv10g0338 | .            | . | . | . | . | . | . |
| .         | .            | . | . | . | . | . | . |
| Vv10g0339 | .            | . | . | . | . | . | . |
| .         | .            | . | . | . | . | . | . |
| Vv10g0340 | .            | . | . | . | . | . | . |
| .         | .            | . | . | . | . | . | . |
| Vv10g0341 | .            | . | . | . | . | . | . |
| .         | .            | . | . | . | . | . | . |
| Vv10g0342 | Tc06_g008660 | . | . | . | . | . | . |
| .         | .            | . | . | . | . | . | . |
| Vv10g0343 | .            | . | . | . | . | . | . |
| .         | .            | . | . | . | . | . | . |
| Vv10g0344 | .            | . | . | . | . | . | . |
| .         | .            | . | . | . | . | . | . |
| Vv10g0345 | .            | . | . | . | . | . | . |
| .         | .            | . | . | . | . | . | . |
| Vv10g0346 | .            | . | . | . | . | . | . |
| .         | .            | . | . | . | . | . | . |
| Vv10g0347 | .            | . | . | . | . | . | . |
| .         | .            | . | . | . | . | . | . |
| Vv10g0348 | .            | . | . | . | . | . | . |
| .         | .            | . | . | . | . | . | . |
| Vv10g0349 | .            | . | . | . | . | . | . |
| .         | .            | . | . | . | . | . | . |
| Vv10g0350 | .            | . | . | . | . | . | . |
| .         | .            | . | . | . | . | . | . |
| Vv10g0351 | .            | . | . | . | . | . | . |
| .         | .            | . | . | . | . | . | . |
| Vv10g0352 | Tc06_g002650 | . | . | . | . | . | . |
| .         | .            | . | . | . | . | . | . |
| Vv10g0353 | .            | . | . | . | . | . | . |
| .         | .            | . | . | . | . | . | . |
| Vv10g0354 | .            | . | . | . | . | . | . |
| .         | .            | . | . | . | . | . | . |



|           |              |   |   |   |   |   |   |
|-----------|--------------|---|---|---|---|---|---|
| Vv10g0371 | .            | . | . | . | . | . | . |
| .         | .            | . | . | . | . | . | . |
| Vv10g0372 | .            | . | . | . | . | . | . |
| .         | .            | . | . | . | . | . | . |
| Vv10g0373 | .            | . | . | . | . | . | . |
| .         | .            | . | . | . | . | . | . |
| Vv10g0374 | Tc06_g000790 | . | . | . | . | . | . |
| .         | .            | . | . | . | . | . | . |
| Vv10g0375 | Tc06_g000780 | . | . | . | . | . | . |
| .         | .            | . | . | . | . | . | . |
| Vv10g0376 | .            | . | . | . | . | . | . |
| .         | .            | . | . | . | . | . | . |
| Vv10g0377 | .            | . | . | . | . | . | . |
| .         | .            | . | . | . | . | . | . |
| Vv10g0378 | .            | . | . | . | . | . | . |
| .         | .            | . | . | . | . | . | . |
| Vv10g0379 | .            | . | . | . | . | . | . |
| .         | .            | . | . | . | . | . | . |
| Vv10g0380 | .            | . | . | . | . | . | . |
| .         | .            | . | . | . | . | . | . |
| Vv10g0381 | .            | . | . | . | . | . | . |
| .         | .            | . | . | . | . | . | . |
| Vv10g0382 | .            | . | . | . | . | . | . |
| .         | .            | . | . | . | . | . | . |
| Vv10g0383 | .            | . | . | . | . | . | . |
| .         | .            | . | . | . | . | . | . |
| Vv10g0384 | Tc06_g018320 | . | . | . | . | . | . |
| .         | .            | . | . | . | . | . | . |
| Vv10g0385 | .            | . | . | . | . | . | . |
| .         | .            | . | . | . | . | . | . |
| Vv10g0386 | .            | . | . | . | . | . | . |
| .         | .            | . | . | . | . | . | . |
| Vv10g0387 | .            | . | . | . | . | . | . |



|           |              |   |   |   |   |   |
|-----------|--------------|---|---|---|---|---|
| Vv10g0404 | Tc06_g000460 | . | . | . | . | . |
| .         | .            | . | . | . | . | . |
| Vv10g0405 | .            | . | . | . | . | . |
| .         | .            | . | . | . | . | . |
| Vv10g0406 | .            | . | . | . | . | . |
| .         | .            | . | . | . | . | . |
| Vv10g0407 | .            | . | . | . | . | . |
| .         | .            | . | . | . | . | . |
| Vv10g0408 | .            | . | . | . | . | . |
| .         | .            | . | . | . | . | . |
| Vv10g0409 | .            | . | . | . | . | . |
| .         | .            | . | . | . | . | . |
| Vv10g0410 | .            | . | . | . | . | . |
| .         | .            | . | . | . | . | . |
| Vv10g0411 | .            | . | . | . | . | . |
| .         | .            | . | . | . | . | . |
| Vv10g0412 | Tc06_g000450 | . | . | . | . | . |
| .         | .            | . | . | . | . | . |
| Vv10g0413 | Tc06_g018270 | . | . | . | . | . |
| .         | .            | . | . | . | . | . |
| Vv10g0414 | .            | . | . | . | . | . |
| .         | .            | . | . | . | . | . |
| Vv10g0415 | .            | . | . | . | . | . |
| .         | .            | . | . | . | . | . |
| Vv10g0416 | .            | . | . | . | . | . |
| .         | .            | . | . | . | . | . |
| Vv10g0417 | .            | . | . | . | . | . |
| .         | .            | . | . | . | . | . |
| Vv10g0418 | .            | . | . | . | . | . |
| .         | .            | . | . | . | . | . |
| Vv10g0419 | .            | . | . | . | . | . |
| .         | .            | . | . | . | . | . |
| Vv10g0420 | .            | . | . | . | . | . |
| .         | .            | . | . | . | . | . |

|           |              |   |   |   |   |   |   |
|-----------|--------------|---|---|---|---|---|---|
| Vv10g0421 | .            | . | . | . | . | . | . |
| .         | .            | . | . | . | . | . | . |
| Vv10g0422 | .            | . | . | . | . | . | . |
| .         | .            | . | . | . | . | . | . |
| Vv10g0423 | .            | . | . | . | . | . | . |
| .         | .            | . | . | . | . | . | . |
| Vv10g0424 | .            | . | . | . | . | . | . |
| .         | .            | . | . | . | . | . | . |
| Vv10g0425 | .            | . | . | . | . | . | . |
| .         | .            | . | . | . | . | . | . |
| Vv10g0426 | .            | . | . | . | . | . | . |
| .         | .            | . | . | . | . | . | . |
| Vv10g0427 | Tc06_g018250 | . | . | . | . | . | . |
| .         | .            | . | . | . | . | . | . |
| Vv10g0428 | .            | . | . | . | . | . | . |
| .         | .            | . | . | . | . | . | . |
| Vv10g0429 | .            | . | . | . | . | . | . |
| .         | .            | . | . | . | . | . | . |
| Vv10g0430 | .            | . | . | . | . | . | . |
| .         | .            | . | . | . | . | . | . |
| Vv10g0431 | .            | . | . | . | . | . | . |
| .         | .            | . | . | . | . | . | . |
| Vv10g0432 | .            | . | . | . | . | . | . |
| .         | .            | . | . | . | . | . | . |
| Vv10g0433 | .            | . | . | . | . | . | . |
| .         | .            | . | . | . | . | . | . |
| Vv10g0434 | .            | . | . | . | . | . | . |
| .         | .            | . | . | . | . | . | . |
| Vv10g0435 | .            | . | . | . | . | . | . |
| .         | .            | . | . | . | . | . | . |
| Vv10g0436 | .            | . | . | . | . | . | . |
| .         | .            | . | . | . | . | . | . |
| Vv10g0437 | .            | . | . | . | . | . | . |

|           |              |   |   |                    |   |   |
|-----------|--------------|---|---|--------------------|---|---|
| .         | .            | . | . | .                  | . | . |
| .         | .            | . | . | .                  | . | . |
| Vv10g0438 | .            | . | . | .                  | . | . |
| .         | .            | . | . | .                  | . | . |
| Vv10g0439 | Tc06_g018160 | . | . | .                  | . | . |
| .         | .            | . | . | .                  | . | . |
| .         | .            | . | . | .                  | . | . |
| Vv10g0440 | .            | . | . | .                  | . | . |
| .         | .            | . | . | .                  | . | . |
| Vv10g0441 | Tc06_g000440 | . | . | Gorai.009G115700.1 | . | . |
| .         | .            | . | . | .                  | . | . |
| Vv10g0442 | Tc06_g000430 | . | . | .                  | . | . |
| .         | .            | . | . | .                  | . | . |
| .         | .            | . | . | .                  | . | . |
| Vv10g0443 | Tc06_g000400 | . | . | .                  | . | . |
| .         | .            | . | . | .                  | . | . |
| .         | .            | . | . | .                  | . | . |
| Vv10g0444 | .            | . | . | .                  | . | . |
| .         | .            | . | . | .                  | . | . |
| .         | .            | . | . | .                  | . | . |
| Vv10g0445 | .            | . | . | .                  | . | . |
| .         | .            | . | . | .                  | . | . |
| .         | .            | . | . | .                  | . | . |
| Vv10g0446 | .            | . | . | .                  | . | . |
| .         | .            | . | . | .                  | . | . |
| .         | .            | . | . | .                  | . | . |
| Vv10g0447 | .            | . | . | .                  | . | . |
| .         | .            | . | . | .                  | . | . |
| .         | .            | . | . | .                  | . | . |
| Vv10g0448 | .            | . | . | .                  | . | . |
| .         | .            | . | . | .                  | . | . |
| .         | .            | . | . | .                  | . | . |
| Vv10g0449 | .            | . | . | .                  | . | . |
| .         | .            | . | . | .                  | . | . |
| .         | .            | . | . | .                  | . | . |
| Vv10g0450 | .            | . | . | .                  | . | . |
| .         | .            | . | . | .                  | . | . |
| .         | .            | . | . | .                  | . | . |
| Vv10g0451 | Tc06_g000370 | . | . | .                  | . | . |
| .         | .            | . | . | .                  | . | . |
| .         | .            | . | . | .                  | . | . |
| Vv10g0452 | .            | . | . | .                  | . | . |
| .         | .            | . | . | .                  | . | . |
| .         | .            | . | . | .                  | . | . |
| Vv10g0453 | .            | . | . | .                  | . | . |
| .         | .            | . | . | .                  | . | . |
| .         | .            | . | . | .                  | . | . |

|              |              |   |   |                    |
|--------------|--------------|---|---|--------------------|
| Vv10g0454    | Tc06_g000360 | . | . | Gorai.009G115600.1 |
| .            | .            | . | . | .                  |
| Vv10g0455    | .            | . | . | .                  |
| .            | .            | . | . | .                  |
| Vv10g0456    | Tc06_g000340 | . | . | .                  |
| .            | .            | . | . | .                  |
| Vv10g0457    | .            | . | . | .                  |
| .            | .            | . | . | .                  |
| Vv10g0458    | Tc06_g000370 | . | . | .                  |
| .            | .            | . | . | .                  |
| Vv10g0459    | .            | . | . | .                  |
| .            | .            | . | . | .                  |
| Vv10g0460    | .            | . | . | .                  |
| .            | .            | . | . | .                  |
| Vv10g0461    | Tc06_g000400 | . | . | .                  |
| .            | .            | . | . | .                  |
| Vv10g0462    | .            | . | . | .                  |
| .            | .            | . | . | .                  |
| Vv10g0463    | .            | . | . | .                  |
| .            | .            | . | . | .                  |
| Vv10g0464    | .            | . | . | .                  |
| .            | .            | . | . | .                  |
| Vv10g0465    | .            | . | . | .                  |
| .            | .            | . | . | .                  |
| Vv10g0466    | Tc06_g002050 | . | . | .                  |
| .            | .            | . | . | .                  |
| Vv10g0467    | Tc06_g002060 | . | . | .                  |
| .            | .            | . | . | .                  |
| Vv10g0468    | .            | . | . | .                  |
| .            | .            | . | . | .                  |
| Vv10g0469    | .            | . | . | .                  |
| .            | .            | . | . | .                  |
| Vv10g0470    | Tc06_g002080 | . | . | Gorai.             |
| 011G007800.1 | .            | . | . | .                  |



|                    |              |   |   |   |   |        |   |
|--------------------|--------------|---|---|---|---|--------|---|
| Vv10g0471          | .            | . | . | . | . | .      | . |
| .                  | .            | . | . | . | . | .      | . |
| Vv10g0472          | Tc06_g002090 | . | . | . | . | Gorai. | . |
| 011G007700.1       | .            | . | . | . | . | .      | . |
| .                  | .            | . | . | . | . | .      | . |
| Vv10g0473          | .            | . | . | . | . | .      | . |
| .                  | .            | . | . | . | . | .      | . |
| Vv10g0474          | .            | . | . | . | . | .      | . |
| .                  | .            | . | . | . | . | .      | . |
| Vv10g0475          | .            | . | . | . | . | .      | . |
| .                  | .            | . | . | . | . | .      | . |
| Vv10g0476          | .            | . | . | . | . | .      | . |
| .                  | .            | . | . | . | . | .      | . |
| Vv10g0477          | Tc06_g018910 | . | . | . | . | .      | . |
| Gorai.010G179300.1 | .            | . | . | . | . | .      | . |
| .                  | .            | . | . | . | . | .      | . |
| Vv10g0478          | .            | . | . | . | . | .      | . |
| .                  | .            | . | . | . | . | .      | . |
| Vv10g0479          | .            | . | . | . | . | .      | . |
| .                  | .            | . | . | . | . | .      | . |
| Vv10g0480          | Tc06_g002200 | . | . | . | . | Gorai. | . |
| 011G007500.1       | .            | . | . | . | . | .      | . |
| .                  | .            | . | . | . | . | .      | . |
| Vv10g0481          | .            | . | . | . | . | .      | . |
| .                  | .            | . | . | . | . | .      | . |
| Vv10g0482          | Tc06_g002220 | . | . | . | . | Gorai. | . |
| 011G007400.1       | .            | . | . | . | . | .      | . |
| .                  | .            | . | . | . | . | .      | . |
| Vv10g0483          | .            | . | . | . | . | .      | . |
| .                  | .            | . | . | . | . | .      | . |
| Vv10g0484          | .            | . | . | . | . | .      | . |
| .                  | .            | . | . | . | . | .      | . |
| Vv10g0485          | .            | . | . | . | . | .      | . |
| .                  | .            | . | . | . | . | .      | . |
| Vv10g0486          | .            | . | . | . | . | .      | . |
| .                  | .            | . | . | . | . | .      | . |
| Vv10g0487          | Tc06_g002250 | . | . | . | . | Gorai. | . |

|                    |                    |                    |   |   |   |                    |   |
|--------------------|--------------------|--------------------|---|---|---|--------------------|---|
| 011G007300.1       | .                  | .                  | . | . | . | .                  | . |
| .                  | .                  | .                  | . | . | . | .                  | . |
| Vv10g0488          | Tc06_g002270       | .                  | . | . | . | .                  | . |
| .                  | .                  | .                  | . | . | . | .                  | . |
| .                  | .                  | .                  | . | . | . | .                  | . |
| Vv10g0489          | Tc06_g002280       | .                  | . | . | . | Gorai.             | . |
| 011G007200.1       | .                  | .                  | . | . | . | .                  | . |
| .                  | .                  | .                  | . | . | . | .                  | . |
| Vv10g0490          | .                  | .                  | . | . | . | .                  | . |
| .                  | .                  | .                  | . | . | . | .                  | . |
| .                  | .                  | .                  | . | . | . | .                  | . |
| Vv10g0491          | Tc06_g002300       | .                  | . | . | . | .                  | . |
| Gorai.010G221400.1 | .                  | .                  | . | . | . | .                  | . |
| .                  | .                  | .                  | . | . | . | .                  | . |
| Vv10g0492          | Tc06_g002320       | .                  | . | . | . | Gorai.             | . |
| 011G007100.1       | Gorai.010G221500.1 | .                  | . | . | . | .                  | . |
| .                  | .                  | .                  | . | . | . | .                  | . |
| .                  | .                  | .                  | . | . | . | .                  | . |
| Vv10g0493          | Tc06_g002770       | .                  | . | . | . | Gorai.009G117200.1 | . |
|                    | Gorai.011G007000.1 | Gorai.010G142800.1 | . | . | . | .                  | . |
| .                  | .                  | .                  | . | . | . | .                  | . |
| .                  | .                  | .                  | . | . | . | .                  | . |
| Vv10g0494          | .                  | .                  | . | . | . | .                  | . |
| .                  | .                  | .                  | . | . | . | .                  | . |
| .                  | .                  | .                  | . | . | . | .                  | . |
| Vv10g0495          | Tc06_g000830       | .                  | . | . | . | Gorai.009G116600.1 | . |
| .                  | .                  | .                  | . | . | . | .                  | . |
| .                  | .                  | .                  | . | . | . | .                  | . |
| Vv10g0496          | .                  | .                  | . | . | . | .                  | . |
| .                  | .                  | .                  | . | . | . | .                  | . |
| .                  | .                  | .                  | . | . | . | .                  | . |
| Vv10g0497          | Tc06_g000890       | .                  | . | . | . | .                  | . |
| .                  | .                  | .                  | . | . | . | .                  | . |
| .                  | .                  | .                  | . | . | . | .                  | . |
| Vv10g0498          | .                  | .                  | . | . | . | .                  | . |
| .                  | .                  | .                  | . | . | . | .                  | . |
| .                  | .                  | .                  | . | . | . | .                  | . |
| Vv10g0499          | .                  | .                  | . | . | . | .                  | . |
| .                  | .                  | .                  | . | . | . | .                  | . |
| .                  | .                  | .                  | . | . | . | .                  | . |
| Vv10g0500          | .                  | .                  | . | . | . | .                  | . |
| .                  | .                  | .                  | . | . | . | .                  | . |
| .                  | .                  | .                  | . | . | . | .                  | . |
| Vv10g0501          | .                  | .                  | . | . | . | .                  | . |
| .                  | .                  | .                  | . | . | . | .                  | . |
| .                  | .                  | .                  | . | . | . | .                  | . |
| Vv10g0502          | Tc06_g000910       | .                  | . | . | . | .                  | . |
| .                  | .                  | .                  | . | . | . | .                  | . |
| .                  | .                  | .                  | . | . | . | .                  | . |
| Vv10g0503          | Tc06_g000920       | .                  | . | . | . | Gorai.009G116700.1 | . |

|                    |              |   |   |   |                    |   |   |
|--------------------|--------------|---|---|---|--------------------|---|---|
| .                  | .            | . | . | . | .                  | . | . |
| .                  | .            | . | . | . | .                  | . | . |
| Vv10g0504          | .            | . | . | . | .                  | . | . |
| .                  | .            | . | . | . | .                  | . | . |
| Vv10g0505          | .            | . | . | . | .                  | . | . |
| .                  | .            | . | . | . | .                  | . | . |
| Vv10g0506          | Tc06_g000940 | . | . | . | .                  | . | . |
| .                  | .            | . | . | . | .                  | . | . |
| Vv10g0507          | .            | . | . | . | .                  | . | . |
| .                  | .            | . | . | . | .                  | . | . |
| Vv10g0508          | Tc06_g000960 | . | . | . | .                  | . | . |
| .                  | .            | . | . | . | .                  | . | . |
| Vv10g0509          | .            | . | . | . | .                  | . | . |
| .                  | .            | . | . | . | .                  | . | . |
| Vv10g0510          | .            | . | . | . | .                  | . | . |
| .                  | .            | . | . | . | .                  | . | . |
| Vv10g0511          | .            | . | . | . | .                  | . | . |
| .                  | .            | . | . | . | .                  | . | . |
| Vv10g0512          | .            | . | . | . | .                  | . | . |
| .                  | .            | . | . | . | .                  | . | . |
| Vv10g0513          | .            | . | . | . | .                  | . | . |
| .                  | .            | . | . | . | .                  | . | . |
| Vv10g0514          | Tc06_g000970 | . | . | . | Gorai.009G116800.1 | . | . |
| .                  | .            | . | . | . | .                  | . | . |
| Vv10g0515          | Tc06_g018870 | . | . | . | .                  | . | . |
| .                  | .            | . | . | . | .                  | . | . |
| Vv10g0516          | .            | . | . | . | .                  | . | . |
| .                  | .            | . | . | . | .                  | . | . |
| Vv10g0517          | .            | . | . | . | .                  | . | . |
| .                  | .            | . | . | . | .                  | . | . |
| Vv10g0518          | Tc06_g000980 | . | . | . | .                  | . | . |
| .                  | .            | . | . | . | .                  | . | . |
| Vv10g0519          | Tc06_g003150 | . | . | . | .                  | . | . |
| Gorai.010G224300.1 | .            | . | . | . | .                  | . | . |
| .                  | .            | . | . | . | .                  | . | . |

|              |              |   |   |   |                    |
|--------------|--------------|---|---|---|--------------------|
| Vv10g0520    | .            | . | . | . | Gorai.011G006900.1 |
| .            | .            | . | . | . | .                  |
| .            | .            | . | . | . | .                  |
| Vv10g0521    | Tc06_g001040 | . | . | . | Gorai.             |
| 011G006700.1 | .            | . | . | . | .                  |
| .            | .            | . | . | . | .                  |
| Vv10g0522    | .            | . | . | . | .                  |
| .            | .            | . | . | . | .                  |
| .            | .            | . | . | . | .                  |
| Vv10g0523    | .            | . | . | . | .                  |
| .            | .            | . | . | . | .                  |
| .            | .            | . | . | . | .                  |
| Vv10g0524    | .            | . | . | . | .                  |
| .            | .            | . | . | . | .                  |
| .            | .            | . | . | . | .                  |
| Vv10g0525    | .            | . | . | . | .                  |
| .            | .            | . | . | . | .                  |
| .            | .            | . | . | . | .                  |
| Vv10g0526    | .            | . | . | . | .                  |
| .            | .            | . | . | . | .                  |
| .            | .            | . | . | . | .                  |
| Vv10g0527    | .            | . | . | . | .                  |
| .            | .            | . | . | . | .                  |
| .            | .            | . | . | . | .                  |
| Vv10g0528    | .            | . | . | . | .                  |
| .            | .            | . | . | . | .                  |
| .            | .            | . | . | . | .                  |
| Vv10g0529    | .            | . | . | . | .                  |
| .            | .            | . | . | . | .                  |
| .            | .            | . | . | . | .                  |
| Vv10g0530    | .            | . | . | . | .                  |
| .            | .            | . | . | . | .                  |
| .            | .            | . | . | . | .                  |
| Vv10g0531    | .            | . | . | . | .                  |
| .            | .            | . | . | . | .                  |
| .            | .            | . | . | . | .                  |
| Vv10g0532    | .            | . | . | . | .                  |
| .            | .            | . | . | . | .                  |
| .            | .            | . | . | . | .                  |
| Vv10g0533    | .            | . | . | . | .                  |
| .            | .            | . | . | . | .                  |
| .            | .            | . | . | . | .                  |
| Vv10g0534    | .            | . | . | . | .                  |
| .            | .            | . | . | . | .                  |
| .            | .            | . | . | . | .                  |
| Vv10g0535    | .            | . | . | . | .                  |
| .            | .            | . | . | . | .                  |
| .            | .            | . | . | . | .                  |
| Vv10g0536    | .            | . | . | . | .                  |
| .            | .            | . | . | . | .                  |

|           |              |   |   |   |                    |   |
|-----------|--------------|---|---|---|--------------------|---|
| Vv10g0537 | .            | . | . | . | Gorai.011G004000.1 | . |
| .         | .            | . | . | . | .                  | . |
| Vv10g0538 | .            | . | . | . | .                  | . |
| .         | .            | . | . | . | .                  | . |
| Vv10g0539 | .            | . | . | . | .                  | . |
| .         | .            | . | . | . | .                  | . |
| Vv10g0540 | .            | . | . | . | .                  | . |
| .         | .            | . | . | . | .                  | . |
| Vv10g0541 | .            | . | . | . | .                  | . |
| .         | .            | . | . | . | .                  | . |
| Vv10g0542 | .            | . | . | . | .                  | . |
| .         | .            | . | . | . | .                  | . |
| Vv10g0543 | .            | . | . | . | .                  | . |
| .         | .            | . | . | . | .                  | . |
| Vv10g0544 | .            | . | . | . | .                  | . |
| .         | .            | . | . | . | .                  | . |
| Vv10g0545 | .            | . | . | . | .                  | . |
| .         | .            | . | . | . | .                  | . |
| Vv10g0546 | .            | . | . | . | .                  | . |
| .         | .            | . | . | . | .                  | . |
| Vv10g0547 | .            | . | . | . | .                  | . |
| .         | .            | . | . | . | .                  | . |
| Vv10g0548 | .            | . | . | . | .                  | . |
| .         | .            | . | . | . | .                  | . |
| Vv10g0549 | Tc06_g018470 | . | . | . | .                  | . |
| .         | .            | . | . | . | .                  | . |
| Vv10g0550 | .            | . | . | . | .                  | . |
| .         | .            | . | . | . | .                  | . |
| Vv10g0551 | .            | . | . | . | .                  | . |
| .         | .            | . | . | . | .                  | . |
| Vv10g0552 | .            | . | . | . | .                  | . |
| .         | .            | . | . | . | .                  | . |
| Vv10g0553 | .            | . | . | . | .                  | . |

|                    |              |   |   |   |   |   |   |
|--------------------|--------------|---|---|---|---|---|---|
| .                  | .            | . | . | . | . | . | . |
| Vv10g0554          | Tc06_g018460 | . | . | . | . | . | . |
| .                  | .            | . | . | . | . | . | . |
| Vv10g0555          | Tc06_g018450 | . | . | . | . | . | . |
| .                  | .            | . | . | . | . | . | . |
| Vv10g0556          | .            | . | . | . | . | . | . |
| .                  | .            | . | . | . | . | . | . |
| Vv10g0557          | Tc06_g018370 | . | . | . | . | . | . |
| .                  | .            | . | . | . | . | . | . |
| Vv10g0558          | Tc06_g018360 | . | . | . | . | . | . |
| .                  | .            | . | . | . | . | . | . |
| Vv10g0559          | .            | . | . | . | . | . | . |
| .                  | .            | . | . | . | . | . | . |
| Vv10g0560          | .            | . | . | . | . | . | . |
| .                  | .            | . | . | . | . | . | . |
| Vv10g0561          | .            | . | . | . | . | . | . |
| .                  | .            | . | . | . | . | . | . |
| Vv10g0562          | .            | . | . | . | . | . | . |
| .                  | .            | . | . | . | . | . | . |
| Vv10g0563          | .            | . | . | . | . | . | . |
| .                  | .            | . | . | . | . | . | . |
| Vv10g0564          | .            | . | . | . | . | . | . |
| .                  | .            | . | . | . | . | . | . |
| Vv10g0565          | .            | . | . | . | . | . | . |
| .                  | .            | . | . | . | . | . | . |
| Vv10g0566          | .            | . | . | . | . | . | . |
| .                  | .            | . | . | . | . | . | . |
| Vv10g0567          | Tc06_g018310 | . | . | . | . | . | . |
| Gorai.010G220800.1 | .            | . | . | . | . | . | . |
| .                  | .            | . | . | . | . | . | . |
| Vv10g0568          | .            | . | . | . | . | . | . |
| .                  | .            | . | . | . | . | . | . |
| Vv10g0569          | .            | . | . | . | . | . | . |
| .                  | .            | . | . | . | . | . | . |
| .                  | .            | . | . | . | . | . | . |

|           |   |   |   |   |   |   |   |
|-----------|---|---|---|---|---|---|---|
| Vv10g0570 | . | . | . | . | . | . | . |
| .         | . | . | . | . | . | . | . |
| Vv10g0571 | . | . | . | . | . | . | . |
| .         | . | . | . | . | . | . | . |
| Vv10g0572 | . | . | . | . | . | . | . |
| .         | . | . | . | . | . | . | . |
| Vv10g0573 | . | . | . | . | . | . | . |
| .         | . | . | . | . | . | . | . |
| Vv10g0574 | . | . | . | . | . | . | . |
| .         | . | . | . | . | . | . | . |
| Vv10g0575 | . | . | . | . | . | . | . |
| .         | . | . | . | . | . | . | . |
| Vv10g0576 | . | . | . | . | . | . | . |
| .         | . | . | . | . | . | . | . |
| Vv10g0577 | . | . | . | . | . | . | . |
| .         | . | . | . | . | . | . | . |
| Vv10g0578 | . | . | . | . | . | . | . |
| .         | . | . | . | . | . | . | . |
| Vv10g0579 | . | . | . | . | . | . | . |
| .         | . | . | . | . | . | . | . |
| Vv10g0580 | . | . | . | . | . | . | . |
| .         | . | . | . | . | . | . | . |
| Vv10g0581 | . | . | . | . | . | . | . |
| .         | . | . | . | . | . | . | . |
| Vv10g0582 | . | . | . | . | . | . | . |
| .         | . | . | . | . | . | . | . |
| Vv10g0583 | . | . | . | . | . | . | . |
| .         | . | . | . | . | . | . | . |
| Vv10g0584 | . | . | . | . | . | . | . |
| .         | . | . | . | . | . | . | . |
| Vv10g0585 | . | . | . | . | . | . | . |
| .         | . | . | . | . | . | . | . |
| Vv10g0586 | . | . | . | . | . | . | . |
| .         | . | . | . | . | . | . | . |

|                    |              |   |   |   |                    |
|--------------------|--------------|---|---|---|--------------------|
| Vv10g0587          | .            | . | . | . | Gorai.011G005200.1 |
| .                  | .            | . | . | . | .                  |
| Vv10g0588          | .            | . | . | . | .                  |
| .                  | .            | . | . | . | .                  |
| Vv10g0589          | .            | . | . | . | .                  |
| .                  | .            | . | . | . | .                  |
| Vv10g0590          | Tc06_g002720 | . | . | . | Gorai.009G117500.1 |
| .                  | .            | . | . | . | .                  |
| Vv10g0591          | .            | . | . | . | .                  |
| .                  | .            | . | . | . | .                  |
| Vv10g0592          | .            | . | . | . | .                  |
| .                  | .            | . | . | . | .                  |
| Vv10g0593          | .            | . | . | . | .                  |
| .                  | .            | . | . | . | .                  |
| Vv10g0594          | .            | . | . | . | .                  |
| .                  | .            | . | . | . | .                  |
| Vv10g0595          | .            | . | . | . | .                  |
| .                  | .            | . | . | . | .                  |
| Vv10g0596          | .            | . | . | . | .                  |
| .                  | .            | . | . | . | .                  |
| Vv10g0597          | .            | . | . | . | .                  |
| .                  | .            | . | . | . | .                  |
| Vv10g0598          | Tc06_g000320 | . | . | . | Gorai.009G115500.1 |
| .                  | .            | . | . | . | .                  |
| Vv10g0599          | .            | . | . | . | .                  |
| .                  | .            | . | . | . | .                  |
| Vv10g0600          | .            | . | . | . | .                  |
| .                  | .            | . | . | . | .                  |
| Vv10g0601          | .            | . | . | . | .                  |
| .                  | .            | . | . | . | .                  |
| Vv10g0602          | Tc06_g000530 | . | . | . | Gorai.009G116000.1 |
| Gorai.011G005300.1 | .            | . | . | . | .                  |
| .                  | .            | . | . | . | .                  |
| .                  | .            | . | . | . | .                  |



|           |                    |   |   |   |                    |   |
|-----------|--------------------|---|---|---|--------------------|---|
| Vv10g0603 | Tc06_g000540       | . | . | . | .                  | . |
| .         | .                  | . | . | . | .                  | . |
| Vv10g0604 | .                  | . | . | . | .                  | . |
| .         | .                  | . | . | . | .                  | . |
| Vv10g0605 | Tc06_g000550       | . | . | . | Gorai.009G116100.1 | . |
|           | Gorai.011G005400.1 | . | . | . | .                  | . |
| .         | .                  | . | . | . | .                  | . |
| Vv10g0606 | .                  | . | . | . | .                  | . |
| .         | .                  | . | . | . | .                  | . |
| Vv10g0607 | .                  | . | . | . | .                  | . |
| .         | .                  | . | . | . | .                  | . |
| Vv10g0608 | .                  | . | . | . | .                  | . |
| .         | .                  | . | . | . | .                  | . |
| Vv10g0609 | .                  | . | . | . | .                  | . |
| .         | .                  | . | . | . | .                  | . |
| Vv10g0610 | Tc06_g000560       | . | . | . | .                  | . |
| .         | .                  | . | . | . | .                  | . |
| Vv10g0611 | .                  | . | . | . | .                  | . |
| .         | .                  | . | . | . | .                  | . |
| Vv10g0612 | Tc06_g000810       | . | . | . | Gorai.009G116500.1 | . |
|           | Gorai.011G006000.1 | . | . | . | .                  | . |
| .         | .                  | . | . | . | .                  | . |
| Vv10g0613 | .                  | . | . | . | .                  | . |
| .         | .                  | . | . | . | .                  | . |
| Vv10g0614 | Tc06_g002710       | . | . | . | Gorai.009G117600.1 | . |
| .         | .                  | . | . | . | .                  | . |
| Vv10g0615 | .                  | . | . | . | .                  | . |
| .         | .                  | . | . | . | .                  | . |
| Vv10g0616 | .                  | . | . | . | .                  | . |
| .         | .                  | . | . | . | .                  | . |
| Vv10g0617 | .                  | . | . | . | .                  | . |
| .         | .                  | . | . | . | .                  | . |
| Vv10g0618 | .                  | . | . | . | .                  | . |
| .         | .                  | . | . | . | .                  | . |
| .         | .                  | . | . | . | .                  | . |

|                    |              |   |   |                    |        |   |
|--------------------|--------------|---|---|--------------------|--------|---|
| Vv10g0619          | Tc06_g000850 | . | . | .                  | .      | . |
| .                  | .            | . | . | .                  | .      | . |
| Vv10g0620          | .            | . | . | .                  | .      | . |
| .                  | .            | . | . | .                  | .      | . |
| Vv10g0621          | .            | . | . | .                  | .      | . |
| .                  | .            | . | . | .                  | .      | . |
| Vv10g0622          | Tc06_g000860 | . | . | .                  | Gorai. | . |
| 011G006100.1       | .            | . | . | .                  | .      | . |
| .                  | .            | . | . | .                  | .      | . |
| Vv10g0623          | .            | . | . | .                  | .      | . |
| .                  | .            | . | . | .                  | .      | . |
| Vv10g0624          | .            | . | . | .                  | .      | . |
| .                  | .            | . | . | .                  | .      | . |
| Vv10g0625          | .            | . | . | .                  | .      | . |
| .                  | .            | . | . | .                  | .      | . |
| Vv10g0626          | .            | . | . | .                  | .      | . |
| .                  | .            | . | . | .                  | .      | . |
| Vv10g0627          | .            | . | . | .                  | .      | . |
| .                  | .            | . | . | .                  | .      | . |
| Vv10g0628          | .            | . | . | .                  | .      | . |
| .                  | .            | . | . | .                  | .      | . |
| Vv10g0629          | .            | . | . | .                  | .      | . |
| .                  | .            | . | . | .                  | .      | . |
| Vv10g0630          | .            | . | . | .                  | .      | . |
| .                  | .            | . | . | .                  | .      | . |
| Vv10g0631          | .            | . | . | .                  | .      | . |
| .                  | .            | . | . | .                  | .      | . |
| Vv10g0632          | Tc06_g001020 | . | . | .                  | Gorai. | . |
| 011G006700.1       | .            | . | . | .                  | .      | . |
| .                  | .            | . | . | .                  | .      | . |
| Vv11g0001          | .            | . | . | .                  | .      | . |
| .                  | .            | . | . | .                  | .      | . |
| Vv11g0002          | .            | . | . | .                  | .      | . |
| .                  | .            | . | . | .                  | .      | . |
| Vv11g0003          | .            | . | . | Gorai.004G285700.1 | .      | . |
| Gorai.009G039400.1 | .            | . | . | .                  | .      | . |

|           |                    |              |  |                    |  |        |  |
|-----------|--------------------|--------------|--|--------------------|--|--------|--|
| Vv11g0004 |                    |              |  |                    |  |        |  |
| Vv11g0005 |                    |              |  |                    |  |        |  |
| Vv11g0006 | Tc09_g006050       |              |  | Gorai.001G018700.1 |  |        |  |
|           | Gorai.009G039300.1 |              |  |                    |  |        |  |
| Vv11g0007 |                    |              |  |                    |  |        |  |
| Vv11g0008 | Tc09_g006070       |              |  | Gorai.001G018600.1 |  |        |  |
|           | Gorai.009G039200.1 |              |  |                    |  |        |  |
| Vv11g0009 | Tc09_g006080       |              |  | Gorai.013G221700.1 |  |        |  |
| Vv11g0010 |                    |              |  |                    |  |        |  |
| Vv11g0011 | Tc09_g006090       |              |  | Gorai.001G018400.1 |  |        |  |
| Vv11g0012 | Tc09_g006100       |              |  |                    |  |        |  |
| Vv11g0013 |                    |              |  |                    |  |        |  |
| Vv11g0014 | Tc09_g006130       |              |  |                    |  |        |  |
|           | Gorai.010G094700.1 |              |  |                    |  |        |  |
| Vv11g0015 | Tc09_g006140       |              |  | Gorai.013G221800.1 |  |        |  |
| Vv11g0016 | Tc09_g006150       |              |  |                    |  | Gorai. |  |
|           | 009G039100.1       | Vv09g0019    |  |                    |  |        |  |
| Vv11g0017 | Tc09_g006160       |              |  |                    |  |        |  |
|           | Vv09g0020          | Tc06_g010770 |  |                    |  |        |  |
|           | Gorai.011G055100.1 |              |  |                    |  |        |  |
| Vv11g0018 |                    |              |  |                    |  |        |  |

|                    |                    |                    |                    |        |
|--------------------|--------------------|--------------------|--------------------|--------|
| Vv11g0019          | Tc09_g006170       | .                  | Gorai.001G018300.1 | .      |
|                    | Gorai.009G039000.1 | .                  | .                  | .      |
| .                  | .                  | .                  | .                  | .      |
| Vv11g0020          | Tc09_g006190       | .                  | Gorai.001G018200.1 | .      |
|                    | Gorai.009G038900.1 | .                  | .                  | .      |
| .                  | .                  | .                  | .                  | .      |
| Vv11g0021          | Tc09_g006200       | .                  | .                  | Gorai. |
| 009G038800.1       | Gorai.010G095300.1 | .                  | .                  | .      |
| .                  | .                  | .                  | .                  | .      |
| Vv11g0022          | Tc09_g006210       | Gorai.013G221900.1 | .                  | .      |
| .                  | Gorai.010G095200.1 | .                  | .                  | .      |
| .                  | .                  | .                  | .                  | .      |
| Vv11g0023          | Tc09_g006220       | .                  | Gorai.001G018100.1 | .      |
|                    | Gorai.009G038700.1 | .                  | Vv09g0026          | .      |
| Tc06_g010720       | Gorai.006G090300.1 | .                  | .                  | .      |
| .                  | .                  | .                  | .                  | .      |
| Vv11g0024          | Tc09_g006230       | .                  | Gorai.001G018000.1 | .      |
|                    | Gorai.009G038600.1 | .                  | .                  | .      |
| .                  | .                  | .                  | .                  | .      |
| Vv11g0025          | Tc09_g006240       | .                  | Gorai.001G017900.1 | .      |
|                    | Gorai.009G038500.1 | .                  | .                  | .      |
| .                  | .                  | .                  | .                  | .      |
| Vv11g0026          | Tc09_g006250       | .                  | .                  | Gorai. |
| 009G038400.1       | .                  | .                  | .                  | .      |
| .                  | .                  | .                  | .                  | .      |
| Vv11g0027          | Tc09_g006260       | Gorai.013G222000.1 | .                  | .      |
|                    | Gorai.009G038300.1 | .                  | Vv09g0027          | .      |
| .                  | Gorai.011G055600.1 | .                  | .                  | .      |
| .                  | .                  | .                  | .                  | .      |
| Vv11g0028          | Tc09_g006280       | .                  | .                  | Gorai. |
| 009G038200.1       | .                  | .                  | .                  | .      |
| .                  | .                  | .                  | .                  | .      |
| Vv11g0029          | Tc09_g006290       | .                  | .                  | .      |
| .                  | .                  | .                  | .                  | .      |
| .                  | .                  | .                  | .                  | .      |
| Vv11g0030          | Tc09_g006300       | Gorai.013G222100.1 | Gorai.             | .      |
| 001G017800.1       | .                  | Gorai.010G092400.1 | Vv09g0043          | .      |
|                    | Tc06_g010520       | Gorai.010G235900.1 | .                  | .      |
| Gorai.011G056600.1 | .                  | .                  | .                  | .      |
| .                  | .                  | .                  | .                  | .      |
| Vv11g0031          | Tc09_g006310       | .                  | .                  | Gorai. |
| 009G038100.1       | .                  | .                  | .                  | .      |
| .                  | .                  | .                  | .                  | .      |

|                    |                    |                    |                    |   |
|--------------------|--------------------|--------------------|--------------------|---|
| Vv11g0032          | Tc09_g006320       | Gorai.013G222300.1 | .                  | . |
| .                  | Vv17g0386          | .                  | .                  | . |
| .                  | .                  | .                  | .                  | . |
| Vv11g0033          | .                  | .                  | .                  | . |
| .                  | .                  | .                  | .                  | . |
| Vv11g0034          | .                  | .                  | .                  | . |
| .                  | .                  | .                  | .                  | . |
| Vv11g0035          | .                  | .                  | .                  | . |
| .                  | .                  | .                  | .                  | . |
| Vv11g0036          | Tc09_g006330       | Gorai.013G222400.1 | Gorai.             | . |
| 001G017700.1       | Gorai.009G038000.1 | Gorai.010G092300.1 | .                  | . |
| .                  | .                  | .                  | .                  | . |
| Vv11g0037          | .                  | .                  | .                  | . |
| .                  | .                  | .                  | .                  | . |
| Vv11g0038          | Tc09_g006340       | .                  | .                  | . |
| .                  | .                  | .                  | .                  | . |
| Vv11g0039          | .                  | .                  | Gorai.009G037900.1 | . |
| .                  | .                  | .                  | .                  | . |
| Vv11g0040          | Tc09_g006350       | Gorai.013G222500.1 | Gorai.             | . |
| 001G017600.1       | Gorai.009G037800.1 | Gorai.010G092200.1 | .                  | . |
| .                  | .                  | .                  | .                  | . |
| Vv09g0049          | Tc06_g010480       | .                  | Gorai.             | . |
| 011G056900.1       | .                  | .                  | .                  | . |
| Vv11g0041          | Tc09_g006360       | .                  | .                  | . |
| .                  | .                  | .                  | .                  | . |
| Vv11g0042          | Tc09_g006380       | Gorai.001G017500.1 | .                  | . |
| Gorai.004G285600.1 | Gorai.009G037700.1 | Gorai.010G091700.1 | .                  | . |
| .                  | .                  | .                  | .                  | . |
| Vv11g0043          | Tc09_g006390       | .                  | Gorai.             | . |
| 009G037600.1       | Gorai.010G091600.1 | .                  | .                  | . |
| .                  | .                  | .                  | .                  | . |
| Vv11g0044          | Tc09_g006400       | Gorai.001G017400.1 | .                  | . |
| .                  | .                  | .                  | .                  | . |
| Vv11g0045          | Tc09_g006410       | Gorai.004G285500.1 | .                  | . |
| .                  | .                  | .                  | .                  | . |
| Vv11g0046          | Tc09_g006420       | Gorai.004G285400.1 | .                  | . |
| .                  | .                  | .                  | .                  | . |

|                    |                    |                    |                    |                    |        |
|--------------------|--------------------|--------------------|--------------------|--------------------|--------|
| Vv11g0047          | Tc09_g006430       | .                  | .                  | .                  | Gorai. |
| 009G037500.1       | Vv04g0226          | .                  | .                  | .                  | .      |
| .                  | .                  | .                  | .                  | .                  | .      |
| Vv11g0048          | Tc09_g006460       | .                  | Gorai.001G017200.1 | .                  | .      |
| Gorai.009G037300.1 | .                  | .                  | .                  | .                  | .      |
| .                  | .                  | .                  | .                  | .                  | .      |
| Vv11g0049          | Gorai.013G222600.1 | .                  | .                  | Gorai.             | .      |
| 004G285300.1       | Gorai.010G091400.1 | .                  | .                  | .                  | .      |
| .                  | .                  | .                  | .                  | .                  | .      |
| Vv11g0050          | Tc09_g006480       | .                  | .                  | .                  | .      |
| .                  | .                  | .                  | .                  | .                  | .      |
| Vv09g0061          | Tc06_g010360       | Gorai.006G090100.1 | .                  | .                  | .      |
| .                  | .                  | .                  | .                  | .                  | .      |
| Vv11g0051          | Tc09_g006490       | .                  | .                  | Gorai.             | .      |
| 009G037200.1       | .                  | .                  | .                  | .                  | .      |
| .                  | .                  | .                  | .                  | .                  | .      |
| Vv11g0052          | .                  | .                  | .                  | .                  | .      |
| .                  | .                  | .                  | .                  | .                  | .      |
| .                  | .                  | .                  | .                  | .                  | .      |
| Vv11g0053          | .                  | .                  | .                  | .                  | .      |
| Vv04g0218          | Tc01_g016100       | Gorai.013G221400.1 | .                  | .                  | .      |
| .                  | .                  | .                  | .                  | .                  | .      |
| .                  | .                  | .                  | .                  | .                  | .      |
| Vv11g0054          | Tc09_g006500       | .                  | Gorai.001G017000.1 | .                  | .      |
| Gorai.009G037100.1 | Gorai.010G091300.1 | .                  | .                  | .                  | .      |
| .                  | .                  | .                  | .                  | .                  | .      |
| .                  | .                  | .                  | .                  | .                  | .      |
| Vv11g0055          | Tc09_g006510       | .                  | Gorai.001G016900.1 | .                  | .      |
| .                  | .                  | .                  | .                  | .                  | .      |
| .                  | .                  | .                  | .                  | .                  | .      |
| Vv11g0056          | Tc09_g006520       | .                  | .                  | Gorai.004G285200.1 | .      |
| .                  | Gorai.010G091100.1 | .                  | .                  | .                  | .      |
| .                  | .                  | .                  | .                  | .                  | .      |
| .                  | .                  | .                  | .                  | .                  | .      |
| Vv11g0057          | Tc09_g006530       | Gorai.013G222700.1 | Gorai.             | .                  | .      |
| 001G016800.1       | Gorai.004G282200.1 | Gorai.009G037000.1 | .                  | .                  | .      |
| .                  | .                  | .                  | .                  | .                  | .      |
| .                  | .                  | .                  | .                  | .                  | .      |
| Vv11g0058          | Tc09_g006550       | Gorai.013G222800.1 | .                  | .                  | .      |
| .                  | .                  | .                  | .                  | .                  | .      |
| .                  | .                  | .                  | .                  | .                  | .      |
| Vv11g0059          | Tc09_g006580       | .                  | Gorai.001G016700.1 | .                  | .      |
| .                  | Gorai.010G090800.1 | .                  | .                  | .                  | .      |
| .                  | .                  | .                  | .                  | .                  | .      |
| .                  | .                  | .                  | .                  | .                  | .      |
| Vv11g0060          | Tc09_g006590       | .                  | Gorai.001G016600.1 | .                  | .      |

|                    |                    |                    |                    |        |   |
|--------------------|--------------------|--------------------|--------------------|--------|---|
| .                  | Gorai.010G090700.1 | .                  | .                  | .      | . |
| .                  | .                  | .                  | .                  | .      | . |
| .                  | .                  | .                  | .                  | .      | . |
| Vv11g0061          | Tc09_g006620       | .                  | .                  | Gorai. | . |
| 009G036800.1       | Gorai.010G090600.1 | .                  | .                  | .      | . |
| .                  | .                  | Vv09g0073          | Tc06_g010210       | .      | . |
| .                  | .                  | .                  | .                  | .      | . |
| Vv11g0062          | Tc09_g006630       | .                  | Gorai.001G016500.1 | .      | . |
| Gorai.009G036700.1 | Gorai.010G090400.1 | .                  | .                  | .      | . |
| .                  | .                  | .                  | .                  | .      | . |
| .                  | .                  | .                  | .                  | .      | . |
| Vv11g0063          | Tc09_g006640       | .                  | Gorai.001G016400.1 | .      | . |
| .                  | .                  | .                  | .                  | .      | . |
| .                  | .                  | .                  | .                  | .      | . |
| Vv11g0064          | Tc09_g006650       | .                  | Gorai.001G016300.1 | .      | . |
| Gorai.009G036600.1 | .                  | .                  | .                  | .      | . |
| .                  | .                  | .                  | .                  | .      | . |
| .                  | .                  | .                  | .                  | .      | . |
| Vv11g0065          | .                  | .                  | .                  | .      | . |
| .                  | .                  | .                  | .                  | .      | . |
| .                  | .                  | .                  | .                  | .      | . |
| Vv11g0066          | Tc09_g006660       | .                  | .                  | .      | . |
| Gorai.010G090300.1 | .                  | .                  | .                  | .      | . |
| .                  | .                  | .                  | .                  | .      | . |
| Vv11g0067          | Tc09_g006670       | .                  | Gorai.001G016200.1 | .      | . |
| .                  | Vv17g0422          | .                  | .                  | .      | . |
| .                  | .                  | .                  | .                  | .      | . |
| .                  | .                  | .                  | .                  | .      | . |
| Vv11g0068          | Tc09_g006680       | .                  | .                  | Gorai. | . |
| 009G036500.1       | Gorai.010G090200.1 | .                  | .                  | .      | . |
| .                  | .                  | .                  | .                  | .      | . |
| .                  | .                  | .                  | .                  | .      | . |
| Vv11g0069          | Tc09_g006690       | .                  | Gorai.001G016100.1 | .      | . |
| Gorai.009G036400.1 | Gorai.010G090100.1 | .                  | .                  | .      | . |
| .                  | .                  | .                  | Vv09g0077          | .      | . |
| Tc06_g010150       | .                  | .                  | .                  | .      | . |
| Vv11g0070          | Tc09_g006700       | .                  | .                  | .      | . |
| Gorai.010G090000.1 | .                  | .                  | .                  | .      | . |
| .                  | Vv09g0078          | Tc06_g010140       | .                  | .      | . |
| .                  | .                  | .                  | .                  | .      | . |
| Vv11g0071          | Tc09_g006710       | .                  | .                  | .      | . |
| Gorai.010G089900.1 | .                  | .                  | .                  | .      | . |
| .                  | .                  | .                  | .                  | .      | . |
| Vv11g0072          | Tc09_g006720       | Gorai.013G222900.1 | Gorai.             | .      | . |
| 001G016000.1       | .                  | Gorai.010G089800.1 | .                  | .      | . |
| .                  | .                  | .                  | Vv09g0080          | .      | . |
| .                  | .                  | .                  | .                  | .      | . |
| Vv11g0073          | .                  | .                  | .                  | .      | . |
| .                  | .                  | .                  | .                  | .      | . |
| .                  | .                  | .                  | .                  | .      | . |

|                    |                    |                    |           |
|--------------------|--------------------|--------------------|-----------|
| Vv11g0074          | Tc09_g006740       | Gorai.013G223100.1 | Gorai.    |
| 001G015800.1       | .                  | Vv17g0446          | .         |
| .                  | .                  | .                  | .         |
| .                  | .                  | .                  | .         |
| Vv11g0075          | .                  | .                  | .         |
| .                  | .                  | .                  | .         |
| .                  | .                  | .                  | .         |
| Vv11g0076          | .                  | .                  | .         |
| Vv17g0454          | Tc03_g013510       | .                  | .         |
| .                  | .                  | .                  | .         |
| Vv11g0077          | .                  | .                  | .         |
| .                  | .                  | .                  | .         |
| .                  | .                  | .                  | .         |
| Vv11g0078          | .                  | Gorai.013G223300.1 | .         |
| .                  | Vv17g0483          | .                  | .         |
| Gorai.008G201500.1 | .                  | .                  | .         |
| .                  | .                  | .                  | .         |
| Vv11g0079          | Tc09_g006760       | .                  | .         |
| Vv17g0485          | .                  | .                  | .         |
| .                  | .                  | .                  | .         |
| .                  | .                  | .                  | .         |
| Vv11g0080          | .                  | .                  | .         |
| Vv17g0487          | Tc03_g013310       | .                  | .         |
| .                  | .                  | .                  | .         |
| Vv11g0081          | Tc09_g006770       | .                  | Gorai.    |
| 009G036300.1       | Gorai.010G089300.1 | Vv04g0212          | .         |
| Gorai.013G221200.1 | Gorai.001G019300.1 | .                  | .         |
| .                  | .                  | .                  | .         |
| Vv11g0082          | .                  | .                  | .         |
| .                  | .                  | .                  | Vv09g0085 |
| .                  | .                  | .                  | .         |
| Vv11g0083          | Tc09_g006780       | .                  | .         |
| .                  | .                  | .                  | .         |
| .                  | .                  | .                  | .         |
| Vv11g0084          | Tc09_g006790       | Gorai.013G223600.1 | .         |
| .                  | .                  | .                  | .         |
| .                  | Vv09g0086          | .                  | .         |
| .                  | .                  | .                  | .         |
| Vv11g0085          | .                  | .                  | .         |
| .                  | .                  | .                  | .         |
| .                  | .                  | .                  | .         |
| Vv11g0086          | Tc09_g006810       | .                  | .         |
| Gorai.010G089100.1 | .                  | .                  | .         |
| .                  | .                  | .                  | .         |
| Vv11g0087          | Tc09_g006820       | Gorai.013G223800.1 | Gorai.    |
| 001G015700.1       | .                  | Gorai.010G088900.1 | .         |
| .                  | .                  | .                  | .         |
| .                  | .                  | .                  | .         |
| Vv11g0088          | Tc09_g006830       | Gorai.013G223900.1 | .         |
| .                  | .                  | .                  | .         |
| .                  | .                  | .                  | .         |



|                    |                    |                    |                    |   |
|--------------------|--------------------|--------------------|--------------------|---|
| Vv11g0089          | Tc09_g006840       | .                  | Gorai.001G015600.1 | . |
|                    | Gorai.009G036200.1 | .                  | .                  | . |
| .                  | .                  | .                  | .                  | . |
| Vv11g0090          | .                  | .                  | .                  | . |
| .                  | .                  | .                  | .                  | . |
| Vv11g0091          | .                  | .                  | .                  | . |
| .                  | .                  | .                  | .                  | . |
| Vv11g0092          | .                  | .                  | .                  | . |
| .                  | .                  | .                  | .                  | . |
| Vv11g0093          | .                  | .                  | .                  | . |
| .                  | .                  | .                  | .                  | . |
| Vv11g0094          | .                  | .                  | .                  | . |
| .                  | .                  | .                  | .                  | . |
| Vv11g0095          | Tc09_g006880       | .                  | .                  | . |
| Gorai.010G088700.1 | .                  | .                  | .                  | . |
| .                  | .                  | .                  | .                  | . |
| Vv11g0096          | .                  | .                  | .                  | . |
| .                  | .                  | .                  | .                  | . |
| Vv11g0097          | .                  | .                  | .                  | . |
| .                  | .                  | .                  | .                  | . |
| Vv11g0098          | Tc09_g006890       | Gorai.013G224000.1 | .                  | . |
| .                  | Gorai.010G088600.1 | .                  | .                  | . |
| .                  | .                  | .                  | .                  | . |
| Vv11g0099          | .                  | .                  | .                  | . |
| .                  | .                  | .                  | .                  | . |
| Vv11g0100          | Tc09_g006900       | Gorai.013G224100.1 | .                  | . |
| .                  | Gorai.010G088500.1 | .                  | .                  | . |
| .                  | .                  | .                  | .                  | . |
| Vv11g0101          | Tc09_g006910       | Gorai.013G224200.1 | .                  | . |
| .                  | .                  | .                  | .                  | . |
| Vv11g0102          | .                  | .                  | .                  | . |
| .                  | .                  | .                  | .                  | . |
| Vv11g0103          | Tc09_g006920       | Gorai.013G224300.1 | .                  | . |
| .                  | .                  | .                  | .                  | . |
| .                  | .                  | .                  | .                  | . |
| Vv11g0104          | Tc09_g006930       | .                  | .                  | . |
| Gorai.010G088400.1 | .                  | .                  | .                  | . |

|                    |                    |                    |                    |        |
|--------------------|--------------------|--------------------|--------------------|--------|
| Vv11g0105          | Tc09_g006940       | .                  | Gorai.001G015500.1 | .      |
|                    | Gorai.009G040300.1 | .                  | Vv04g0202          | .      |
|                    | Gorai.001G019700.1 | .                  | .                  | .      |
| Vv11g0106          | Tc09_g006980       | Gorai.013G224400.1 | .                  | .      |
|                    | Gorai.010G088300.1 | .                  | .                  | .      |
|                    | .                  | .                  | .                  | .      |
| Vv11g0107          | Tc09_g007010       | .                  | .                  | .      |
| Gorai.010G088200.1 | .                  | .                  | .                  | .      |
| Vv11g0108          | Tc09_g007020       | Gorai.013G224500.1 | .                  | .      |
|                    | Gorai.010G088100.1 | .                  | .                  | .      |
|                    | .                  | .                  | .                  | .      |
| Vv11g0109          | .                  | .                  | .                  | .      |
|                    | .                  | .                  | .                  | .      |
| Vv11g0110          | Tc09_g007050       | .                  | .                  | .      |
| Gorai.010G087700.1 | .                  | .                  | .                  | .      |
| Vv11g0111          | .                  | .                  | .                  | .      |
|                    | .                  | .                  | .                  | .      |
| Vv11g0112          | Tc09_g007060       | Gorai.013G225200.1 | .                  | .      |
|                    | Gorai.010G087600.1 | .                  | .                  | .      |
|                    | .                  | .                  | .                  | .      |
| Vv11g0113          | Tc09_g007070       | .                  | .                  | .      |
| Gorai.010G087500.1 | .                  | .                  | .                  | .      |
| Vv11g0114          | .                  | .                  | .                  | .      |
|                    | .                  | .                  | .                  | .      |
| Vv11g0115          | Tc09_g007080       | .                  | Gorai.001G015400.1 | .      |
|                    | Gorai.009G035500.1 | .                  | .                  | .      |
|                    | .                  | Vv09g0114          | Tc06_g000370       | .      |
|                    | .                  | .                  | .                  | .      |
| Vv11g0116          | Tc09_g007090       | .                  | .                  | Gorai. |
| 009G035400.1       | Gorai.010G087400.1 | .                  | .                  | .      |
|                    | .                  | .                  | .                  | .      |
| Vv11g0117          | Tc09_g007100       | .                  | .                  | Gorai. |
| 009G035300.1       | .                  | .                  | .                  | .      |
|                    | .                  | .                  | .                  | .      |
| Vv11g0118          | Tc09_g007110       | Gorai.013G225300.1 | .                  | .      |
|                    | Gorai.009G035200.1 | .                  | .                  | .      |
|                    | .                  | Vv09g0116          | .                  | .      |
|                    | .                  | .                  | .                  | .      |

|                    |                    |                    |                    |        |   |
|--------------------|--------------------|--------------------|--------------------|--------|---|
| Vv11g0119          | .                  | .                  | Gorai.001G015300.1 | .      | . |
| .                  | .                  | .                  | .                  | .      | . |
| Vv11g0120          | Tc09_g007120       | .                  | .                  | .      | . |
| .                  | .                  | .                  | .                  | .      | . |
| Vv11g0121          | Tc09_g007130       | Gorai.013G225400.1 | .                  | .      | . |
| .                  | .                  | .                  | .                  | .      | . |
| Vv11g0122          | Tc09_g007140       | Gorai.013G225500.1 | .                  | .      | . |
| Gorai.009G035100.1 | .                  | .                  | .                  | .      | . |
| .                  | .                  | .                  | .                  | .      | . |
| Vv11g0123          | Tc09_g007150       | .                  | .                  | Gorai. | . |
| 009G035000.1       | .                  | .                  | .                  | .      | . |
| .                  | .                  | .                  | .                  | .      | . |
| Vv11g0124          | .                  | .                  | .                  | .      | . |
| .                  | .                  | .                  | .                  | .      | . |
| Vv11g0125          | Tc09_g007160       | Gorai.001G015200.1 | .                  | .      | . |
| .                  | Gorai.010G087200.1 | .                  | .                  | .      | . |
| .                  | .                  | .                  | .                  | .      | . |
| Vv11g0126          | .                  | .                  | .                  | .      | . |
| .                  | .                  | .                  | .                  | .      | . |
| Vv11g0127          | .                  | .                  | .                  | .      | . |
| .                  | .                  | .                  | .                  | .      | . |
| Vv11g0128          | .                  | .                  | .                  | .      | . |
| .                  | .                  | .                  | .                  | .      | . |
| Vv11g0129          | .                  | .                  | .                  | .      | . |
| .                  | .                  | .                  | .                  | .      | . |
| Vv11g0130          | .                  | Gorai.001G015100.1 | .                  | .      | . |
| Gorai.009G034900.1 | .                  | .                  | .                  | .      | . |
| .                  | .                  | .                  | .                  | .      | . |
| Vv11g0131          | Tc09_g007180       | Gorai.001G014900.1 | .                  | .      | . |
| .                  | .                  | .                  | .                  | .      | . |
| Vv11g0132          | Tc09_g007190       | Gorai.013G225600.1 | Gorai.             | .      | . |
| 001G014800.1       | Gorai.009G034800.1 | Gorai.010G087000.1 | .                  | .      | . |
| .                  | .                  | .                  | .                  | .      | . |
| Vv11g0133          | .                  | .                  | .                  | .      | . |
| .                  | .                  | .                  | .                  | .      | . |
| Vv11g0134          | Tc09_g007200       | Gorai.001G014700.1 | .                  | .      | . |

|                    |                    |   |                    |   |                    |
|--------------------|--------------------|---|--------------------|---|--------------------|
|                    | Gorai.009G041200.1 | . | Vv04g0174          | . | .                  |
|                    | Gorai.001G020800.1 | . | .                  | . | Vv09g0128          |
| Vv11g0135          | Tc09_g007210       | . | Gorai.013G225700.1 | . | .                  |
| .                  | .                  | . | .                  | . | .                  |
| Vv11g0136          | Tc09_g007220       | . | Gorai.013G225800.1 | . | Gorai.             |
| 001G014500.1       | .                  | . | Vv04g0172          | . | .                  |
| .                  | .                  | . | .                  | . | .                  |
| Vv11g0137          | .                  | . | .                  | . | .                  |
| .                  | .                  | . | .                  | . | .                  |
| Vv11g0138          | Tc09_g007230       | . | .                  | . | Gorai.             |
| 009G041300.1       | Gorai.010G086800.1 | . | Vv04g0171          | . | .                  |
| Gorai.001G020900.1 | .                  | . | .                  | . | .                  |
| Vv11g0139          | Tc09_g007250       | . | Gorai.001G014400.1 | . | .                  |
| .                  | .                  | . | .                  | . | .                  |
| Vv11g0140          | Tc09_g007260       | . | Gorai.001G014300.1 | . | .                  |
| .                  | Gorai.010G086700.1 | . | .                  | . | .                  |
| .                  | .                  | . | .                  | . | .                  |
| Vv11g0141          | Tc09_g007270       | . | .                  | . | Gorai.             |
| 009G041500.1       | Gorai.010G086600.1 | . | Vv04g0169          | . | .                  |
| Gorai.001G021000.1 | .                  | . | .                  | . | Vv09g0132          |
| Vv11g0142          | Tc09_g007280       | . | Gorai.013G226100.1 | . | .                  |
| Gorai.009G034500.1 | .                  | . | Gorai.010G086500.1 | . | .                  |
| .                  | .                  | . | .                  | . | Vv09g0134          |
| .                  | .                  | . | .                  | . | .                  |
| Vv11g0143          | Tc09_g007290       | . | .                  | . | .                  |
| Gorai.010G086400.1 | .                  | . | .                  | . | .                  |
| .                  | Vv09g0135          | . | Tc06_g011930       | . | Gorai.006G095300.1 |
| Gorai.010G234300.1 | .                  | . | .                  | . | .                  |
| Vv11g0144          | .                  | . | .                  | . | .                  |
| .                  | .                  | . | .                  | . | .                  |
| Vv11g0145          | Tc09_g007310       | . | Gorai.013G226300.1 | . | .                  |
| .                  | .                  | . | .                  | . | .                  |
| Vv11g0146          | Tc09_g007320       | . | Gorai.013G226400.1 | . | .                  |
| Gorai.009G041700.1 | .                  | . | Gorai.010G086100.1 | . | Vv04g0166          |
| .                  | Gorai.013G226400.1 | . | Gorai.001G021300.1 | . | .                  |
| .                  | Vv09g0140          | . | .                  | . | .                  |
| .                  | .                  | . | .                  | . | .                  |
| Vv11g0147          | .                  | . | .                  | . | .                  |
| .                  | .                  | . | .                  | . | .                  |
| .                  | .                  | . | .                  | . | .                  |

|                    |                    |                    |        |   |   |        |   |
|--------------------|--------------------|--------------------|--------|---|---|--------|---|
| Vv11g0148          | .                  | .                  | .      | . | . | .      | . |
| .                  | .                  | .                  | .      | . | . | .      | . |
| Vv11g0149          | .                  | .                  | .      | . | . | .      | . |
| .                  | .                  | .                  | .      | . | . | .      | . |
| Vv11g0150          | .                  | .                  | .      | . | . | Gorai. | . |
| 010G086000.1       | .                  | .                  | .      | . | . | .      | . |
| .                  | .                  | .                  | .      | . | . | .      | . |
| Vv11g0151          | Tc09_g007330       | .                  | .      | . | . | .      | . |
| Gorai.010G085900.1 | .                  | .                  | .      | . | . | .      | . |
| .                  | .                  | .                  | .      | . | . | .      | . |
| Vv11g0152          | .                  | .                  | .      | . | . | .      | . |
| .                  | .                  | .                  | .      | . | . | .      | . |
| Vv11g0153          | .                  | .                  | .      | . | . | .      | . |
| .                  | .                  | .                  | .      | . | . | .      | . |
| Vv11g0154          | Tc09_g007340       | Gorai.013G226500.1 | .      | . | . | .      | . |
| Gorai.009G034400.1 | .                  | Gorai.010G085800.1 | .      | . | . | .      | . |
| .                  | .                  | .                  | .      | . | . | .      | . |
| Vv11g0155          | .                  | .                  | .      | . | . | .      | . |
| .                  | .                  | .                  | .      | . | . | .      | . |
| Vv11g0156          | .                  | .                  | .      | . | . | .      | . |
| .                  | .                  | .                  | .      | . | . | .      | . |
| Vv11g0157          | .                  | .                  | .      | . | . | .      | . |
| .                  | .                  | .                  | .      | . | . | .      | . |
| Vv11g0158          | .                  | .                  | .      | . | . | .      | . |
| .                  | .                  | .                  | .      | . | . | .      | . |
| Vv11g0159          | .                  | .                  | .      | . | . | .      | . |
| Vv04g0145          | Gorai.013G226500.1 | Gorai.001G021600.1 | .      | . | . | .      | . |
| .                  | .                  | .                  | .      | . | . | .      | . |
| Vv11g0160          | Tc09_g007350       | .                  | .      | . | . | .      | . |
| .                  | .                  | .                  | .      | . | . | .      | . |
| Vv11g0161          | .                  | .                  | .      | . | . | .      | . |
| .                  | .                  | .                  | .      | . | . | .      | . |
| Vv11g0162          | Gorai.013G226600.1 | .                  | .      | . | . | .      | . |
| Gorai.010G085700.1 | .                  | .                  | .      | . | . | .      | . |
| .                  | .                  | .                  | .      | . | . | .      | . |
| Vv11g0163          | Tc09_g007360       | Gorai.013G226700.1 | Gorai. | . | . | .      | . |
| 001G014100.1       | Gorai.009G034300.1 | .                  | .      | . | . | .      | . |

|                    |                    |   |   |                    |   |           |   |
|--------------------|--------------------|---|---|--------------------|---|-----------|---|
| .                  | .                  | . | . | .                  | . | .         | . |
| .                  | .                  | . | . | .                  | . | .         | . |
| Vv11g0164          | .                  | . | . | .                  | . | .         | . |
| .                  | .                  | . | . | .                  | . | Vv09g0171 | . |
| .                  | .                  | . | . | .                  | . | .         | . |
| Vv11g0165          | Tc09_g007370       | . | . | .                  | . | Gorai.    | . |
| 009G034200.1       | Gorai.010G085500.1 | . | . | .                  | . | .         | . |
| .                  | .                  | . | . | .                  | . | .         | . |
| .                  | .                  | . | . | .                  | . | .         | . |
| Vv11g0166          | Tc09_g007380       | . | . | Gorai.001G014000.1 | . | .         | . |
| .                  | Gorai.010G085400.1 | . | . | .                  | . | .         | . |
| .                  | .                  | . | . | .                  | . | .         | . |
| .                  | .                  | . | . | .                  | . | .         | . |
| Vv11g0167          | Tc09_g007390       | . | . | .                  | . | Gorai.    | . |
| 009G034000.1       | .                  | . | . | .                  | . | .         | . |
| .                  | .                  | . | . | .                  | . | .         | . |
| Vv11g0168          | Tc09_g007400       | . | . | Gorai.001G013900.1 | . | .         | . |
| .                  | .                  | . | . | .                  | . | .         | . |
| Vv11g0169          | .                  | . | . | .                  | . | .         | . |
| .                  | .                  | . | . | .                  | . | .         | . |
| Vv11g0170          | .                  | . | . | .                  | . | .         | . |
| .                  | .                  | . | . | .                  | . | .         | . |
| Vv11g0171          | Tc09_g007420       | . | . | Gorai.001G013700.1 | . | .         | . |
| Gorai.009G033900.1 | .                  | . | . | .                  | . | .         | . |
| .                  | .                  | . | . | .                  | . | .         | . |
| .                  | .                  | . | . | .                  | . | .         | . |
| Vv11g0172          | Tc09_g007440       | . | . | .                  | . | Gorai.    | . |
| 009G033800.1       | .                  | . | . | .                  | . | .         | . |
| .                  | .                  | . | . | .                  | . | .         | . |
| Vv11g0173          | Tc09_g007450       | . | . | Gorai.001G013500.1 | . | .         | . |
| .                  | Vv04g0140          | . | . | .                  | . | .         | . |
| .                  | .                  | . | . | .                  | . | .         | . |
| .                  | .                  | . | . | .                  | . | .         | . |
| Vv11g0174          | Tc09_g007460       | . | . | Gorai.001G013400.1 | . | .         | . |
| Gorai.009G033700.1 | Gorai.010G084900.1 | . | . | .                  | . | .         | . |
| .                  | .                  | . | . | .                  | . | .         | . |
| .                  | .                  | . | . | .                  | . | .         | . |
| Vv11g0175          | Tc09_g007470       | . | . | .                  | . | .         | . |
| .                  | .                  | . | . | .                  | . | .         | . |
| .                  | .                  | . | . | .                  | . | .         | . |
| Vv11g0176          | Gorai.013G226800.1 | . | . | .                  | . | .         | . |
| .                  | Vv04g0136          | . | . | Gorai.013G226800.1 | . | .         | . |
| .                  | .                  | . | . | .                  | . | .         | . |
| .                  | .                  | . | . | .                  | . | .         | . |
| Vv11g0177          | Tc09_g007490       | . | . | .                  | . | .         | . |
| Gorai.010G084800.1 | .                  | . | . | .                  | . | .         | . |
| .                  | .                  | . | . | .                  | . | .         | . |
| .                  | .                  | . | . | .                  | . | .         | . |

|                    |                    |                    |                    |   |   |        |   |
|--------------------|--------------------|--------------------|--------------------|---|---|--------|---|
| Vv11g0178          | .                  | .                  | .                  | . | . | .      | . |
| .                  | .                  | .                  | .                  | . | . | .      | . |
| Vv11g0179          | Tc09_g007500       | .                  | .                  | . | . | Gorai. | . |
| 009G042800.1       | Gorai.010G084700.1 | .                  | .                  | . | . | .      | . |
| .                  | .                  | .                  | .                  | . | . | .      | . |
| Vv11g0180          | Tc09_g007510       | .                  | .                  | . | . | Gorai. | . |
| 009G033300.1       | .                  | .                  | .                  | . | . | .      | . |
| .                  | .                  | .                  | .                  | . | . | .      | . |
| Vv11g0181          | Tc09_g007530       | .                  | .                  | . | . | Gorai. | . |
| 009G033100.1       | .                  | .                  | .                  | . | . | .      | . |
| .                  | .                  | .                  | .                  | . | . | .      | . |
| Vv11g0182          | Tc09_g007540       | .                  | .                  | . | . | Gorai. | . |
| 009G033000.1       | .                  | .                  | .                  | . | . | .      | . |
| .                  | .                  | .                  | .                  | . | . | .      | . |
| Vv11g0183          | .                  | .                  | .                  | . | . | .      | . |
| .                  | .                  | .                  | .                  | . | . | .      | . |
| Vv11g0184          | Tc09_g007550       | .                  | .                  | . | . | Gorai. | . |
| 009G032900.1       | .                  | .                  | .                  | . | . | .      | . |
| .                  | .                  | .                  | .                  | . | . | .      | . |
| Vv11g0185          | Tc09_g007560       | .                  | .                  | . | . | .      | . |
| .                  | .                  | .                  | .                  | . | . | .      | . |
| Vv11g0186          | Tc09_g007570       | Gorai.013G227000.1 | .                  | . | . | .      | . |
| Gorai.009G032800.1 | Gorai.010G084600.1 | .                  | .                  | . | . | .      | . |
| .                  | .                  | .                  | .                  | . | . | .      | . |
| Vv11g0187          | Tc09_g007580       | .                  | .                  | . | . | .      | . |
| Gorai.010G084500.1 | .                  | .                  | .                  | . | . | .      | . |
| .                  | .                  | .                  | .                  | . | . | .      | . |
| Vv11g0188          | Tc09_g007590       | .                  | .                  | . | . | .      | . |
| .                  | .                  | .                  | .                  | . | . | .      | . |
| Vv09g0185          | Tc06_g009090       | .                  | .                  | . | . | Gorai. | . |
| 011G063400.1       | .                  | .                  | .                  | . | . | .      | . |
| Vv11g0189          | Tc09_g007600       | .                  | .                  | . | . | .      | . |
| .                  | .                  | .                  | .                  | . | . | .      | . |
| Vv11g0190          | Tc09_g007610       | .                  | Gorai.001G013200.1 | . | . | .      | . |
| Gorai.009G043500.1 | .                  | .                  | .                  | . | . | .      | . |
| .                  | .                  | .                  | .                  | . | . | .      | . |
| Vv11g0191          | Tc09_g007620       | Gorai.013G227100.1 | .                  | . | . | .      | . |
| Gorai.009G032600.1 | .                  | .                  | .                  | . | . | .      | . |
| .                  | .                  | .                  | .                  | . | . | .      | . |
| Vv11g0192          | Tc09_g007640       | Gorai.013G227200.1 | .                  | . | . | .      | . |
| Gorai.009G043900.1 | Gorai.010G084300.1 | .                  | .                  | . | . | .      | . |
| .                  | .                  | .                  | .                  | . | . | .      | . |

|                    |                    |                    |                    |   |
|--------------------|--------------------|--------------------|--------------------|---|
| Vv11g0193          | Tc09_g007650       | .                  | Gorai.001G012800.1 | . |
| .                  | .                  | .                  | .                  | . |
| Vv11g0194          | Tc09_g007660       | .                  | Gorai.004G284300.1 | . |
| .                  | .                  | .                  | .                  | . |
| Vv11g0195          | Tc09_g007670       | .                  | Gorai.001G012700.1 | . |
| Gorai.004G284200.1 | Gorai.009G032300.1 | .                  | .                  | . |
| .                  | .                  | .                  | .                  | . |
| Vv11g0196          | .                  | .                  | .                  | . |
| .                  | .                  | .                  | .                  | . |
| Vv11g0197          | Tc09_g007680       | .                  | .                  | . |
| Gorai.010G084200.1 | .                  | .                  | .                  | . |
| .                  | .                  | .                  | .                  | . |
| Vv11g0198          | Tc09_g007690       | .                  | Gorai.             | . |
| 009G032200.1       | .                  | .                  | .                  | . |
| .                  | .                  | .                  | .                  | . |
| Vv11g0199          | .                  | .                  | .                  | . |
| .                  | .                  | .                  | .                  | . |
| Vv11g0200          | Tc09_g007700       | .                  | Gorai.             | . |
| 009G032100.1       | .                  | .                  | .                  | . |
| .                  | .                  | .                  | .                  | . |
| Vv11g0201          | Tc09_g007710       | .                  | Gorai.001G012500.1 | . |
| Gorai.009G032000.1 | Gorai.010G084100.1 | .                  | .                  | . |
| .                  | .                  | .                  | .                  | . |
| Vv11g0202          | Tc09_g007720       | Gorai.013G227300.1 | .                  | . |
| .                  | Gorai.010G084000.1 | .                  | .                  | . |
| .                  | .                  | .                  | .                  | . |
| Vv11g0203          | Tc09_g007730       | .                  | Gorai.001G012400.1 | . |
| Gorai.009G031900.1 | Gorai.010G083900.1 | .                  | .                  | . |
| .                  | .                  | .                  | .                  | . |
| Vv11g0204          | .                  | .                  | .                  | . |
| .                  | .                  | .                  | .                  | . |
| Vv11g0205          | Tc09_g007740       | .                  | .                  | . |
| Gorai.010G083800.1 | .                  | .                  | .                  | . |
| .                  | .                  | .                  | .                  | . |
| Vv11g0206          | Tc09_g007750       | .                  | Gorai.             | . |
| 009G044400.1       | Gorai.010G083600.1 | Vv04g0116          | .                  | . |
| .                  | .                  | Gorai.011G061800.1 | .                  | . |
| .                  | .                  | .                  | .                  | . |
| Vv11g0207          | Tc09_g007760       | .                  | .                  | . |
| Gorai.010G083500.1 | .                  | .                  | .                  | . |



|                                 |                                    |                                          |              |
|---------------------------------|------------------------------------|------------------------------------------|--------------|
| Vv11g0208<br>001G012300.1       | Tc09_g007770                       | Gorai.013G227400.1<br>Gorai.010G083400.1 | Gorai.       |
| Vv11g0209                       | Tc09_g007780                       | Gorai.001G012200.1                       |              |
| Vv11g0210                       | Tc09_g007790                       |                                          |              |
| Vv11g0211<br>010G083200.1       |                                    |                                          | Gorai.       |
| Vv11g0212                       | Tc09_g007810                       |                                          |              |
| Vv11g0213                       |                                    |                                          |              |
| Vv11g0214                       | Tc09_g001690                       |                                          |              |
| Vv11g0215                       | Tc09_g007820                       | Gorai.001G012000.1                       |              |
| Vv11g0216<br>Gorai.009G031700.1 | Tc09_g007850                       | Gorai.013G227700.1                       |              |
| Vv11g0217<br>009G031600.1       | Tc09_g007860<br>Gorai.010G083100.1 | Vv09g0192                                | Gorai.       |
| Vv11g0218                       |                                    |                                          |              |
| Vv11g0219<br>Gorai.009G031500.1 | Tc09_g007890                       | Gorai.001G011800.1                       |              |
| Vv11g0220                       | Tc09_g007910                       | Gorai.001G011700.1                       |              |
| Vv11g0221                       | Tc09_g007920<br>Gorai.010G082900.1 | Gorai.001G011600.1<br>Vv09g0206          | Tc06_g008850 |
| Vv11g0222<br>009G045000.1       | Tc09_g007930<br>Gorai.010G082800.1 |                                          | Gorai.       |

|                    |                    |                    |   |                    |                    |   |   |
|--------------------|--------------------|--------------------|---|--------------------|--------------------|---|---|
| .                  | .                  | .                  | . | .                  | .                  | . | . |
| .                  | .                  | .                  | . | .                  | .                  | . | . |
| Vv11g0223          | Tc09_g001550       | .                  | . | .                  | .                  | . | . |
| .                  | .                  | .                  | . | .                  | .                  | . | . |
| .                  | .                  | .                  | . | .                  | .                  | . | . |
| Vv11g0224          | .                  | .                  | . | .                  | .                  | . | . |
| .                  | .                  | .                  | . | .                  | .                  | . | . |
| .                  | .                  | .                  | . | .                  | .                  | . | . |
| Vv11g0225          | .                  | .                  | . | .                  | .                  | . | . |
| .                  | .                  | .                  | . | .                  | .                  | . | . |
| .                  | .                  | .                  | . | .                  | .                  | . | . |
| Vv11g0226          | .                  | .                  | . | .                  | .                  | . | . |
| .                  | .                  | .                  | . | .                  | .                  | . | . |
| .                  | .                  | .                  | . | .                  | .                  | . | . |
| Vv11g0227          | .                  | .                  | . | .                  | .                  | . | . |
| .                  | .                  | .                  | . | .                  | .                  | . | . |
| .                  | .                  | .                  | . | .                  | .                  | . | . |
| Vv11g0228          | .                  | .                  | . | .                  | .                  | . | . |
| .                  | .                  | .                  | . | .                  | .                  | . | . |
| .                  | .                  | .                  | . | .                  | .                  | . | . |
| Vv11g0229          | Tc09_g007960       | .                  | . | Gorai.001G011300.1 | .                  | . | . |
| .                  | .                  | .                  | . | .                  | .                  | . | . |
| .                  | .                  | .                  | . | .                  | .                  | . | . |
| Vv11g0230          | .                  | .                  | . | .                  | Gorai.009G045100.1 | . | . |
| .                  | .                  | .                  | . | .                  | .                  | . | . |
| .                  | .                  | .                  | . | .                  | .                  | . | . |
| Vv11g0231          | Tc09_g007970       | .                  | . | .                  | .                  | . | . |
| Gorai.010G082500.1 | .                  | .                  | . | .                  | .                  | . | . |
| .                  | .                  | .                  | . | .                  | .                  | . | . |
| .                  | .                  | .                  | . | .                  | .                  | . | . |
| Vv11g0232          | .                  | .                  | . | .                  | .                  | . | . |
| .                  | .                  | .                  | . | .                  | .                  | . | . |
| .                  | .                  | .                  | . | .                  | .                  | . | . |
| Vv11g0233          | Tc09_g007980       | .                  | . | .                  | Gorai.             | . | . |
| 009G031300.1       | Gorai.010G082300.1 | .                  | . | .                  | .                  | . | . |
| .                  | .                  | .                  | . | .                  | .                  | . | . |
| .                  | .                  | .                  | . | .                  | .                  | . | . |
| Vv11g0234          | Tc09_g007990       | .                  | . | .                  | Gorai.             | . | . |
| 009G031200.1       | Gorai.010G082200.1 | .                  | . | .                  | .                  | . | . |
| .                  | .                  | .                  | . | .                  | .                  | . | . |
| .                  | .                  | .                  | . | .                  | .                  | . | . |
| Vv11g0235          | Tc09_g008000       | .                  | . | .                  | .                  | . | . |
| .                  | .                  | .                  | . | .                  | .                  | . | . |
| .                  | .                  | .                  | . | .                  | .                  | . | . |
| Vv11g0236          | Tc09_g008010       | Gorai.013G227900.1 | . | .                  | .                  | . | . |
| Gorai.004G284100.1 | .                  | .                  | . | .                  | .                  | . | . |
| .                  | .                  | Vv09g0216          | . | .                  | .                  | . | . |
| .                  | Gorai.011G066300.1 | .                  | . | .                  | .                  | . | . |
| Vv11g0237          | Tc09_g008020       | Gorai.013G228000.1 | . | .                  | .                  | . | . |
| Gorai.004G284000.1 | Gorai.009G031100.1 | .                  | . | .                  | .                  | . | . |
| .                  | .                  | .                  | . | .                  | .                  | . | . |
| .                  | .                  | .                  | . | .                  | .                  | . | . |

|                    |                    |                    |                    |        |   |
|--------------------|--------------------|--------------------|--------------------|--------|---|
| Vv11g0238          | Tc09_g008030       | .                  | .                  | .      | . |
| Gorai.010G082100.1 | .                  | .                  | .                  | .      | . |
| Vv11g0239          | Tc09_g008040       | .                  | Gorai.001G011200.1 | .      | . |
| Gorai.009G031000.1 | .                  | Gorai.010G082000.1 | .                  | .      | . |
| Vv11g0240          | Tc09_g008050       | .                  | .                  | .      | . |
| Gorai.010G081900.1 | .                  | .                  | .                  | .      | . |
| Vv11g0241          | Tc09_g008080       | .                  | .                  | .      | . |
| Vv11g0242          | Tc09_g008110       | Gorai.013G228100.1 | .                  | .      | . |
| Gorai.004G283900.1 | .                  | .                  | .                  | .      | . |
| Vv11g0243          | .                  | .                  | Gorai.009G030900.1 | .      | . |
| Gorai.010G081800.1 | .                  | Vv04g0090          | .                  | .      | . |
| Vv11g0244          | Tc09_g008130       | .                  | .                  | .      | . |
| Gorai.010G081700.1 | .                  | .                  | .                  | .      | . |
| Vv11g0245          | Tc09_g008140       | .                  | .                  | .      | . |
| Gorai.010G081600.1 | .                  | .                  | .                  | .      | . |
| Vv11g0246          | Tc09_g008150       | .                  | .                  | .      | . |
| Vv11g0247          | Tc09_g008160       | Gorai.013G228200.1 | .                  | .      | . |
| Vv11g0248          | Tc09_g008170       | Gorai.013G228400.1 | .                  | .      | . |
| Vv11g0249          | Tc09_g008180       | Gorai.013G228500.1 | .                  | .      | . |
| Gorai.009G030800.1 | .                  | .                  | .                  | .      | . |
| Vv11g0250          | Tc09_g008190       | .                  | .                  | Gorai. | . |
| 009G030700.1       | .                  | Vv04g0087          | .                  | .      | . |
| .                  | Gorai.011G067300.1 | Vv09g0223          | .                  | .      | . |
| .                  | Gorai.011G067300.1 | .                  | .                  | .      | . |
| Vv11g0251          | Tc09_g008200       | Gorai.001G023200.1 | .                  | .      | . |
| Gorai.009G045800.1 | .                  | Gorai.010G081500.1 | Vv04g0085          | .      | . |
| .                  | Gorai.001G011000.1 | .                  | .                  | .      | . |
| Vv11g0252          | .                  | .                  | .                  | .      | . |

|                    |                    |                    |                    |   |        |   |   |
|--------------------|--------------------|--------------------|--------------------|---|--------|---|---|
| .                  | .                  | .                  | .                  | . | .      | . | . |
| .                  | .                  | .                  | .                  | . | .      | . | . |
| Vv11g0253          | Tc09_g008210       | .                  | .                  | . | .      | . | . |
| .                  | .                  | .                  | .                  | . | .      | . | . |
| Vv11g0254          | Tc09_g008220       | .                  | Gorai.001G010900.1 | . | .      | . | . |
|                    | Gorai.009G045900.1 | .                  | .                  | . | .      | . | . |
| .                  | .                  | .                  | .                  | . | .      | . | . |
| Vv11g0255          | Tc09_g008230       | .                  | Gorai.001G010800.1 | . | .      | . | . |
| .                  | .                  | .                  | .                  | . | .      | . | . |
| Vv11g0256          | Tc09_g008240       | .                  | .                  | . | Gorai. | . | . |
| 009G030600.1       | Gorai.010G081400.1 | .                  | .                  | . | .      | . | . |
| .                  | .                  | .                  | .                  | . | .      | . | . |
| Vv11g0257          | Tc09_g008250       | .                  | .                  | . | .      | . | . |
| Gorai.010G081300.1 | .                  | .                  | .                  | . | .      | . | . |
| .                  | .                  | .                  | .                  | . | .      | . | . |
| Vv11g0258          | .                  | Gorai.001G023300.1 | .                  | . | .      | . | . |
| Gorai.009G046000.1 | .                  | Vv04g0083          | .                  | . | .      | . | . |
| Gorai.001G023300.1 | .                  | Gorai.003G060000.1 | Gorai.             | . | .      | . | . |
| 011G067400.1       | Vv09g0225          | .                  | .                  | . | .      | . | . |
| Gorai.011G067400.1 | .                  | .                  | .                  | . | .      | . | . |
| Vv11g0259          | Tc09_g008260       | .                  | Gorai.001G010700.1 | . | .      | . | . |
|                    | Gorai.009G030500.1 | .                  | .                  | . | .      | . | . |
| .                  | .                  | .                  | .                  | . | .      | . | . |
| Vv11g0260          | Tc09_g008280       | Gorai.013G228600.1 | .                  | . | .      | . | . |
|                    | Gorai.009G030300.1 | .                  | .                  | . | .      | . | . |
| .                  | .                  | .                  | .                  | . | .      | . | . |
| Vv11g0261          | Tc09_g008290       | .                  | Gorai.001G010500.1 | . | .      | . | . |
|                    | Gorai.009G030200.1 | Gorai.010G081100.1 | .                  | . | .      | . | . |
| .                  | .                  | .                  | .                  | . | .      | . | . |
| Vv11g0262          | .                  | Gorai.004G283700.1 | .                  | . | .      | . | . |
| .                  | .                  | .                  | .                  | . | .      | . | . |
| Vv11g0263          | Tc09_g008300       | .                  | .                  | . | .      | . | . |
| .                  | .                  | .                  | .                  | . | .      | . | . |
| Vv11g0264          | .                  | .                  | .                  | . | Gorai. | . | . |
| 010G081000.1       | .                  | .                  | .                  | . | .      | . | . |
| .                  | .                  | .                  | .                  | . | .      | . | . |
| Vv11g0265          | Tc09_g008310       | .                  | .                  | . | .      | . | . |
| .                  | .                  | .                  | .                  | . | .      | . | . |
| Vv11g0266          | Tc09_g008340       | .                  | .                  | . | .      | . | . |
| Gorai.010G080700.1 | .                  | .                  | .                  | . | .      | . | . |

|                    |                    |                    |                    |                    |   |
|--------------------|--------------------|--------------------|--------------------|--------------------|---|
| Vv11g0267          | Tc09_g008350       | .                  | .                  | Gorai.004G283500.1 | . |
| .                  | .                  | .                  | .                  | .                  | . |
| Vv11g0268          | Tc09_g008370       | .                  | .                  | Gorai.004G283400.1 | . |
|                    | Gorai.009G030000.1 | .                  | .                  | .                  | . |
| .                  | .                  | .                  | .                  | .                  | . |
| Vv11g0269          | Tc09_g008390       | Gorai.013G228700.1 | .                  | .                  | . |
| Gorai.004G283300.1 | Gorai.009G029900.1 | Gorai.010G080500.1 | .                  | .                  | . |
| .                  | .                  | .                  | .                  | .                  | . |
| Vv11g0270          | .                  | .                  | .                  | .                  | . |
| .                  | .                  | .                  | .                  | .                  | . |
| Vv11g0271          | Tc09_g008400       | .                  | .                  | Gorai.             | . |
| 009G029800.1       | .                  | .                  | .                  | .                  | . |
| .                  | .                  | .                  | .                  | .                  | . |
| Vv11g0272          | .                  | .                  | Gorai.004G283200.1 | .                  | . |
| .                  | .                  | .                  | .                  | .                  | . |
| Vv11g0273          | Tc09_g008410       | .                  | .                  | .                  | . |
| Gorai.010G080400.1 | .                  | .                  | .                  | .                  | . |
| .                  | .                  | .                  | .                  | .                  | . |
| Vv11g0274          | Tc09_g008420       | Gorai.013G228800.1 | .                  | .                  | . |
| Gorai.009G029700.1 | .                  | .                  | .                  | .                  | . |
| .                  | .                  | .                  | .                  | .                  | . |
| Vv11g0275          | Tc09_g008440       | .                  | .                  | Gorai.             | . |
| 009G029600.1       | Gorai.010G080300.1 | .                  | .                  | .                  | . |
| .                  | .                  | Vv09g0239          | .                  | .                  | . |
| .                  | Gorai.011G068400.1 | .                  | .                  | .                  | . |
| Vv11g0276          | Tc09_g008450       | Gorai.013G228900.1 | Gorai.             | .                  | . |
| 001G010300.1       | Gorai.004G283100.1 | Gorai.009G029400.1 | .                  | .                  | . |
| Gorai.010G080200.1 | Vv04g0061          | .                  | .                  | .                  | . |
| .                  | Vv09g0256          | .                  | .                  | .                  | . |
| .                  | .                  | .                  | .                  | .                  | . |
| Vv11g0277          | .                  | .                  | .                  | .                  | . |
| .                  | .                  | .                  | .                  | .                  | . |
| Vv11g0278          | .                  | .                  | .                  | .                  | . |
| .                  | .                  | .                  | .                  | .                  | . |
| Vv11g0279          | .                  | .                  | .                  | .                  | . |
| .                  | .                  | .                  | .                  | .                  | . |
| Vv11g0280          | Tc09_g008490       | .                  | .                  | .                  | . |
| Gorai.010G079900.1 | .                  | .                  | .                  | .                  | . |
| .                  | .                  | .                  | .                  | .                  | . |
| Vv11g0281          | Tc09_g008500       | Gorai.013G229000.1 | Gorai.             | .                  | . |

|                    |                    |                    |                    |
|--------------------|--------------------|--------------------|--------------------|
| 001G024400.1       | Gorai.004G283000.1 | Gorai.009G047600.1 | .                  |
| Vv04g0057          | .                  | Gorai.013G229000.1 | Gorai.             |
| 001G009900.1       | Gorai.004G283000.1 | .                  | .                  |
| .                  | .                  | .                  | .                  |
| Vv11g0282          | Tc09_g008510       | .                  | .                  |
| Gorai.010G079700.1 | .                  | .                  | .                  |
| .                  | Vv09g0278          | .                  | .                  |
| .                  | .                  | .                  | .                  |
| Vv11g0283          | .                  | .                  | .                  |
| .                  | .                  | .                  | .                  |
| Vv11g0284          | .                  | .                  | Gorai.009G047700.1 |
| .                  | .                  | .                  | .                  |
| .                  | .                  | .                  | .                  |
| Vv11g0285          | .                  | .                  | Gorai.             |
| 010G079600.1       | Vv04g0055          | Gorai.013G219900.1 | .                  |
| .                  | .                  | .                  | .                  |
| .                  | .                  | .                  | .                  |
| Vv11g0286          | .                  | .                  | .                  |
| .                  | .                  | .                  | .                  |
| .                  | .                  | .                  | .                  |
| Vv11g0287          | Tc09_g008540       | Gorai.013G219900.1 | .                  |
| .                  | .                  | .                  | .                  |
| .                  | .                  | .                  | .                  |
| Vv11g0288          | Tc09_g008550       | .                  | .                  |
| Gorai.010G079400.1 | .                  | .                  | .                  |
| .                  | .                  | .                  | .                  |
| Vv11g0289          | Tc09_g008560       | Gorai.013G229100.1 | .                  |
| Gorai.009G029200.1 | .                  | .                  | .                  |
| .                  | .                  | .                  | .                  |
| .                  | .                  | .                  | .                  |
| Vv11g0290          | .                  | .                  | .                  |
| .                  | .                  | .                  | .                  |
| .                  | .                  | .                  | .                  |
| Vv11g0291          | Tc09_g008570       | Gorai.013G229200.1 | Gorai.             |
| 001G025000.1       | Gorai.009G029100.1 | Gorai.010G079100.1 | .                  |
| Vv04g0049          | .                  | Gorai.013G229200.1 | Gorai.             |
| 001G025000.1       | Gorai.003G061100.1 | .                  | .                  |
| .                  | .                  | .                  | .                  |
| Vv11g0292          | Tc09_g008580       | .                  | .                  |
| .                  | .                  | .                  | .                  |
| .                  | .                  | .                  | .                  |
| Vv11g0293          | Tc09_g008600       | Gorai.013G229300.1 | .                  |
| Gorai.004G282800.1 | .                  | .                  | .                  |
| .                  | .                  | Vv09g0301          | Tc06_g007170       |
| .                  | .                  | .                  | .                  |
| Vv11g0294          | Tc09_g008620       | .                  | Gorai.             |
| 009G028900.1       | Gorai.010G078900.1 | .                  | .                  |
| .                  | .                  | .                  | .                  |
| .                  | .                  | .                  | .                  |

|                    |                    |                    |                    |   |        |
|--------------------|--------------------|--------------------|--------------------|---|--------|
| Vv11g0295          | Tc09_g008630       | .                  | .                  | . | Gorai. |
| 009G028800.1       | Gorai.010G078800.1 | .                  | .                  | . | .      |
| .                  | .                  | .                  | .                  | . | .      |
| .                  | .                  | .                  | .                  | . | .      |
| Vv11g0296          | Tc09_g008640       | Gorai.013G229400.1 | .                  | . | .      |
| Gorai.009G028700.1 |                    | Gorai.010G078700.1 | .                  | . | .      |
| .                  | .                  | .                  | .                  | . | .      |
| .                  | .                  | .                  | .                  | . | .      |
| Vv11g0297          | Tc09_g008650       | .                  | .                  | . | .      |
| Gorai.010G078600.1 | .                  | .                  | .                  | . | .      |
| .                  | Vv09g0304          | Tc06_g007180       | .                  | . | .      |
| .                  | .                  | .                  | .                  | . | .      |
| Vv11g0298          | Tc09_g008660       | .                  | Gorai.001G009800.1 | . | .      |
| Gorai.009G028600.1 | .                  | .                  | .                  | . | .      |
| .                  | .                  | .                  | .                  | . | .      |
| .                  | .                  | .                  | .                  | . | .      |
| Vv11g0299          | .                  | .                  | .                  | . | .      |
| .                  | .                  | .                  | .                  | . | .      |
| .                  | .                  | .                  | .                  | . | .      |
| Vv11g0300          | Tc09_g008680       | Gorai.013G229500.1 | Gorai.             | . | .      |
| 001G025300.1       | .                  | Gorai.009G028500.1 | Gorai.010G078500.1 | . | .      |
| Vv04g0046          | .                  | Gorai.013G229500.1 | Gorai.             | . | .      |
| 001G025300.1       | Gorai.004G282500.1 | Gorai.003G061200.1 | .                  | . | .      |
| .                  | .                  | .                  | .                  | . | .      |
| Vv11g0301          | Tc09_g008690       | .                  | Gorai.004G282400.1 | . | .      |
| Gorai.009G028400.1 | .                  | Gorai.010G078400.1 | .                  | . | .      |
| .                  | .                  | .                  | Vv09g0307          | . | .      |
| Tc06_g007230       | .                  | .                  | .                  | . | .      |
| Vv11g0302          | Tc09_g008700       | .                  | Gorai.004G282300.1 | . | .      |
| Gorai.009G028300.1 | .                  | Gorai.010G078300.1 | .                  | . | .      |
| .                  | .                  | .                  | .                  | . | .      |
| .                  | .                  | .                  | .                  | . | .      |
| Vv11g0303          | Tc09_g008710       | .                  | Gorai.001G009700.1 | . | .      |
| .                  | .                  | .                  | .                  | . | .      |
| .                  | .                  | .                  | .                  | . | .      |
| Vv11g0304          | .                  | .                  | .                  | . | .      |
| .                  | .                  | .                  | .                  | . | .      |
| .                  | .                  | .                  | .                  | . | .      |
| Vv11g0305          | .                  | .                  | .                  | . | .      |
| .                  | .                  | .                  | .                  | . | .      |
| .                  | .                  | .                  | .                  | . | .      |
| Vv11g0306          | Tc09_g008730       | .                  | Gorai.004G282200.1 | . | .      |
| Gorai.009G028100.1 | .                  | .                  | .                  | . | .      |
| .                  | .                  | .                  | .                  | . | .      |
| .                  | .                  | .                  | .                  | . | .      |
| Vv11g0307          | Tc09_g008750       | .                  | Gorai.             | . | .      |
| 009G028000.1       | Gorai.010G078000.1 | .                  | .                  | . | .      |
| .                  | .                  | .                  | .                  | . | .      |
| .                  | .                  | .                  | .                  | . | .      |
| Vv11g0308          | .                  | .                  | .                  | . | .      |

|                    |                    |                    |                    |                    |        |   |   |
|--------------------|--------------------|--------------------|--------------------|--------------------|--------|---|---|
| .                  | .                  | .                  | .                  | .                  | .      | . | . |
| .                  | .                  | .                  | .                  | .                  | .      | . | . |
| Vv11g0309          | Tc09_g008770       | .                  | .                  | .                  | .      | . | . |
| Gorai.010G077900.1 | .                  | .                  | .                  | .                  | .      | . | . |
| .                  | .                  | .                  | .                  | .                  | .      | . | . |
| Vv11g0310          | Tc09_g008790       | .                  | .                  | Gorai.001G009400.1 | .      | . | . |
| .                  | Gorai.010G077800.1 | .                  | .                  | .                  | .      | . | . |
| .                  | .                  | .                  | .                  | .                  | .      | . | . |
| .                  | .                  | .                  | .                  | .                  | .      | . | . |
| Vv11g0311          | Tc09_g008800       | .                  | .                  | Gorai.001G009300.1 | .      | . | . |
| Gorai.004G282000.1 | Gorai.009G027900.1 | .                  | .                  | .                  | .      | . | . |
| .                  | .                  | .                  | .                  | Vv09g0315          | .      | . | . |
| Tc06_g007260       | .                  | .                  | .                  | .                  | .      | . | . |
| Vv11g0312          | .                  | .                  | Gorai.001G025700.1 | .                  | .      | . | . |
| Gorai.009G048100.1 | .                  | .                  | .                  | .                  | .      | . | . |
| .                  | Vv09g0316          | .                  | Tc06_g007300       | Gorai.             | .      | . | . |
| 006G096700.1       | .                  | .                  | .                  | .                  | .      | . | . |
| Vv11g0313          | Tc09_g008830       | .                  | .                  | Gorai.004G281900.1 | .      | . | . |
| .                  | Gorai.010G077700.1 | .                  | .                  | .                  | .      | . | . |
| .                  | .                  | .                  | .                  | .                  | .      | . | . |
| .                  | .                  | .                  | .                  | .                  | .      | . | . |
| Vv11g0314          | Tc09_g008850       | .                  | .                  | .                  | .      | . | . |
| Gorai.010G077400.1 | .                  | .                  | .                  | .                  | .      | . | . |
| .                  | Vv09g0317          | Tc06_g007320       | Gorai.006G096800.1 | .                  | .      | . | . |
| .                  | Gorai.011G070700.1 | .                  | .                  | .                  | .      | . | . |
| Vv11g0315          | Tc09_g008880       | .                  | .                  | .                  | .      | . | . |
| .                  | .                  | .                  | .                  | .                  | .      | . | . |
| .                  | .                  | .                  | .                  | .                  | .      | . | . |
| Vv11g0316          | .                  | .                  | .                  | .                  | .      | . | . |
| .                  | .                  | .                  | .                  | .                  | .      | . | . |
| .                  | .                  | .                  | .                  | .                  | .      | . | . |
| Vv11g0317          | .                  | .                  | .                  | .                  | Gorai. | . | . |
| 010G077300.1       | .                  | .                  | .                  | .                  | .      | . | . |
| .                  | .                  | .                  | .                  | .                  | .      | . | . |
| Vv11g0318          | Tc09_g008900       | Gorai.013G219800.1 | .                  | .                  | .      | . | . |
| Gorai.009G048300.1 | .                  | .                  | .                  | .                  | .      | . | . |
| .                  | .                  | .                  | .                  | .                  | .      | . | . |
| .                  | .                  | .                  | .                  | .                  | .      | . | . |
| Vv11g0319          | .                  | .                  | .                  | .                  | .      | . | . |
| .                  | .                  | .                  | .                  | .                  | .      | . | . |
| .                  | .                  | .                  | .                  | .                  | .      | . | . |
| Vv11g0320          | Tc09_g008910       | .                  | .                  | .                  | .      | . | . |
| .                  | .                  | .                  | .                  | .                  | .      | . | . |
| .                  | .                  | .                  | .                  | .                  | .      | . | . |
| Vv11g0321          | .                  | .                  | .                  | Gorai.009G027500.1 | .      | . | . |
| Gorai.010G077100.1 | .                  | .                  | .                  | .                  | .      | . | . |
| .                  | .                  | .                  | .                  | .                  | .      | . | . |
| .                  | .                  | .                  | .                  | .                  | .      | . | . |
| Vv11g0322          | Tc09_g008920       | .                  | .                  | .                  | .      | . | . |
| .                  | .                  | .                  | .                  | .                  | .      | . | . |



|                    |                    |                    |                    |                    |
|--------------------|--------------------|--------------------|--------------------|--------------------|
| Vv11g0323          | Tc09_g008940       | .                  | .                  | Gorai.004G281800.1 |
| .                  | Gorai.010G077000.1 | .                  | .                  | .                  |
| .                  | .                  | .                  | .                  | .                  |
| Vv11g0324          | Tc09_g008950       | .                  | .                  | Gorai.             |
| 009G027400.1       | .                  | .                  | .                  | .                  |
| .                  | .                  | .                  | .                  | .                  |
| Vv11g0325          | Tc09_g008960       | .                  | .                  | .                  |
| .                  | .                  | .                  | .                  | .                  |
| .                  | .                  | .                  | .                  | .                  |
| Vv11g0326          | Tc09_g008970       | .                  | .                  | Gorai.             |
| 009G048500.1       | Vv04g0012          | .                  | .                  | .                  |
| .                  | Gorai.011G068900.1 | .                  | Vv09g0328          | .                  |
| Tc06_g007390       | Gorai.006G096900.1 | .                  | .                  | Gorai.             |
| 011G071100.1       | .                  | .                  | .                  | .                  |
| Vv11g0327          | Tc09_g009000       | .                  | .                  | .                  |
| Gorai.010G076700.1 | .                  | .                  | .                  | .                  |
| .                  | Vv09g0336          | .                  | Tc06_g007440       | .                  |
| Gorai.011G071300.1 | .                  | .                  | .                  | .                  |
| Vv11g0328          | Tc09_g009020       | .                  | .                  | .                  |
| Gorai.010G076300.1 | .                  | .                  | .                  | .                  |
| .                  | .                  | .                  | .                  | .                  |
| Vv11g0329          | Tc09_g009030       | .                  | Gorai.001G026200.1 | .                  |
| Gorai.009G048600.1 | .                  | .                  | Vv04g0008          | .                  |
| Gorai.001G008900.1 | .                  | .                  | Gorai.003G061800.1 | .                  |
| Gorai.011G071400.1 | Vv09g0339          | .                  | Tc06_g007460       | .                  |
| .                  | Gorai.011G071400.1 | .                  | .                  | .                  |
| Vv11g0330          | .                  | .                  | .                  | .                  |
| .                  | .                  | .                  | .                  | .                  |
| .                  | .                  | .                  | .                  | .                  |
| Vv11g0331          | Tc09_g009050       | .                  | Gorai.001G008800.1 | .                  |
| Gorai.009G057700.1 | .                  | .                  | .                  | .                  |
| .                  | .                  | .                  | .                  | .                  |
| .                  | .                  | .                  | .                  | .                  |
| Vv11g0332          | Tc09_g009060       | .                  | Gorai.004G281700.1 | .                  |
| .                  | Gorai.010G076200.1 | .                  | .                  | .                  |
| .                  | .                  | .                  | .                  | .                  |
| .                  | .                  | .                  | .                  | .                  |
| Vv11g0333          | Tc09_g009070       | .                  | Gorai.001G008700.1 | .                  |
| .                  | Vv04g0004          | .                  | Gorai.             | .                  |
| 001G008700.1       | Gorai.003G062600.1 | .                  | Gorai.011G072200.1 | .                  |
| .                  | .                  | .                  | .                  | .                  |
| Vv11g0334          | Tc09_g009090       | Gorai.013G219400.1 | Gorai.             | .                  |
| 001G008600.1       | .                  | Vv04g0322          | .                  | .                  |
| Gorai.013G219300.1 | Gorai.001G008600.1 | .                  | .                  | .                  |
| .                  | .                  | .                  | .                  | .                  |
| Vv11g0335          | Tc09_g009100       | .                  | Gorai.             | .                  |
| 009G027300.1       | .                  | .                  | .                  | .                  |
| .                  | .                  | .                  | .                  | .                  |

|                    |                    |                    |                    |        |
|--------------------|--------------------|--------------------|--------------------|--------|
| Vv11g0336          | Tc09_g009110       | .                  | Gorai.001G008500.1 | .      |
| .                  | .                  | .                  | .                  | .      |
| .                  | .                  | .                  | .                  | .      |
| Vv11g0337          | Tc09_g009120       | .                  | .                  | .      |
| Gorai.010G076100.1 | .                  | .                  | .                  | .      |
| .                  | .                  | .                  | .                  | .      |
| Vv11g0338          | Tc09_g009130       | .                  | .                  | .      |
| Gorai.010G076000.1 | .                  | .                  | .                  | .      |
| .                  | .                  | .                  | .                  | .      |
| Vv11g0339          | Tc09_g009140       | Gorai.013G229700.1 | .                  | .      |
| .                  | Gorai.010G075800.1 | .                  | .                  | .      |
| .                  | .                  | .                  | .                  | .      |
| .                  | .                  | .                  | .                  | .      |
| Vv11g0340          | Tc09_g009150       | Gorai.013G219200.1 | Gorai.             | .      |
| 001G008200.1       | .                  | Gorai.009G027200.1 | Gorai.010G075600.1 | .      |
| Vv04g0337          | .                  | Gorai.013G219200.1 | Gorai.             | .      |
| 001G008200.1       | Gorai.004G288600.1 | Gorai.009G049700.1 | .                  | .      |
| .                  | .                  | .                  | .                  | .      |
| Vv11g0341          | Tc09_g009160       | .                  | .                  | .      |
| Gorai.010G075400.1 | .                  | .                  | .                  | .      |
| .                  | .                  | .                  | .                  | .      |
| Vv11g0342          | .                  | .                  | .                  | .      |
| .                  | .                  | .                  | .                  | .      |
| .                  | .                  | .                  | .                  | .      |
| Vv11g0343          | Tc09_g009180       | .                  | Gorai.001G008000.1 | .      |
| .                  | .                  | .                  | .                  | .      |
| .                  | .                  | .                  | .                  | .      |
| Vv11g0344          | Tc09_g009190       | Gorai.013G219000.1 | .                  | .      |
| Gorai.009G059200.1 | .                  | Vv04g0342          | .                  | .      |
| .                  | .                  | .                  | .                  | .      |
| .                  | .                  | .                  | .                  | .      |
| Vv11g0345          | Tc09_g009200       | Gorai.013G216000.1 | Gorai.             | .      |
| 001G007900.1       | .                  | Gorai.009G059300.1 | Vv04g0343          | .      |
| .                  | Gorai.013G219000.1 | Gorai.001G007900.1 | .                  | .      |
| .                  | Gorai.010G107300.1 | .                  | .                  | .      |
| .                  | .                  | .                  | .                  | .      |
| Vv11g0346          | Tc09_g009210       | .                  | .                  | .      |
| Gorai.010G075200.1 | .                  | .                  | .                  | .      |
| .                  | .                  | .                  | .                  | .      |
| Vv11g0347          | Tc09_g009220       | .                  | Gorai.001G007800.1 | .      |
| .                  | Gorai.010G075100.1 | .                  | .                  | .      |
| .                  | .                  | .                  | .                  | .      |
| .                  | .                  | .                  | .                  | .      |
| Vv11g0348          | Tc09_g009240       | .                  | .                  | Gorai. |
| 009G027000.1       | Gorai.010G074900.1 | .                  | .                  | .      |
| .                  | .                  | .                  | .                  | .      |
| .                  | .                  | .                  | .                  | .      |
| Vv11g0349          | Tc09_g009250       | .                  | Gorai.001G007700.1 | .      |
| .                  | Gorai.010G074800.1 | .                  | .                  | .      |
| .                  | .                  | .                  | .                  | .      |

|                    |                    |                    |                    |   |   |   |   |
|--------------------|--------------------|--------------------|--------------------|---|---|---|---|
| Vv11g0350          | .                  | .                  | .                  | . | . | . | . |
| .                  | .                  | .                  | .                  | . | . | . | . |
| Vv11g0351          | Tc09_g009260       | .                  | Gorai.001G007600.1 | . | . | . | . |
| .                  | Gorai.010G074600.1 | .                  | .                  | . | . | . | . |
| .                  | .                  | .                  | .                  | . | . | . | . |
| Vv11g0352          | Tc09_g009270       | .                  | Gorai.004G281400.1 | . | . | . | . |
| Gorai.009G026900.1 | .                  | Gorai.010G074500.1 | Vv04g0359          | . | . | . | . |
| .                  | .                  | Gorai.004G281400.1 | .                  | . | . | . | . |
| Gorai.010G108000.1 | .                  | .                  | .                  | . | . | . | . |
| .                  | .                  | .                  | .                  | . | . | . | . |
| Vv11g0353          | .                  | .                  | .                  | . | . | . | . |
| .                  | .                  | .                  | .                  | . | . | . | . |
| Vv11g0354          | Tc09_g009280       | .                  | Gorai.001G007500.1 | . | . | . | . |
| .                  | .                  | .                  | .                  | . | . | . | . |
| Vv11g0355          | Tc09_g009300       | .                  | Gorai.001G026300.1 | . | . | . | . |
| Gorai.009G048800.1 | .                  | Gorai.010G074400.1 | .                  | . | . | . | . |
| .                  | .                  | .                  | .                  | . | . | . | . |
| Vv11g0356          | .                  | .                  | .                  | . | . | . | . |
| .                  | .                  | .                  | .                  | . | . | . | . |
| Vv11g0357          | Tc09_g009340       | .                  | .                  | . | . | . | . |
| Gorai.010G074000.1 | .                  | .                  | .                  | . | . | . | . |
| .                  | .                  | .                  | .                  | . | . | . | . |
| Vv11g0358          | Tc09_g009350       | .                  | Gorai.004G281000.1 | . | . | . | . |
| .                  | Vv04g0361          | .                  | .                  | . | . | . | . |
| Gorai.004G281000.1 | .                  | .                  | .                  | . | . | . | . |
| .                  | .                  | .                  | .                  | . | . | . | . |
| Vv11g0359          | Tc09_g009360       | .                  | Gorai.001G007300.1 | . | . | . | . |
| Gorai.009G026800.1 | .                  | Gorai.010G073900.1 | .                  | . | . | . | . |
| .                  | .                  | .                  | .                  | . | . | . | . |
| Vv11g0360          | .                  | .                  | .                  | . | . | . | . |
| .                  | .                  | .                  | .                  | . | . | . | . |
| Vv11g0361          | Tc09_g009370       | Gorai.013G230500.1 | .                  | . | . | . | . |
| .                  | Gorai.010G073800.1 | .                  | .                  | . | . | . | . |
| .                  | .                  | .                  | .                  | . | . | . | . |
| Vv11g0362          | Tc09_g009380       | .                  | .                  | . | . | . | . |
| Gorai.010G073700.1 | .                  | .                  | .                  | . | . | . | . |
| .                  | .                  | .                  | .                  | . | . | . | . |
| Vv11g0363          | Tc09_g009390       | .                  | Gorai.001G007200.1 | . | . | . | . |
| Gorai.004G280900.1 | .                  | .                  | .                  | . | . | . | . |
| .                  | .                  | .                  | .                  | . | . | . | . |

|                    |                    |                    |                    |                    |        |
|--------------------|--------------------|--------------------|--------------------|--------------------|--------|
| Vv11g0364          | Tc09_g009400       | .                  | .                  | .                  | Gorai. |
| 009G026700.1       | .                  | .                  | .                  | .                  | .      |
| .                  | Vv09g0379          | Tc06_g008030       | .                  | .                  | .      |
| .                  | .                  | .                  | .                  | .                  | .      |
| Vv11g0365          | Tc09_g009410       | .                  | Gorai.001G007100.1 | .                  | .      |
| .                  | .                  | .                  | .                  | .                  | .      |
| .                  | .                  | .                  | .                  | .                  | .      |
| Vv11g0366          | Tc09_g009420       | .                  | Gorai.001G007000.1 | .                  | .      |
| Gorai.009G026600.1 | .                  | Gorai.010G073600.1 | .                  | .                  | .      |
| .                  | .                  | .                  | .                  | .                  | .      |
| .                  | .                  | .                  | .                  | .                  | .      |
| Vv11g0367          | Tc09_g009430       | .                  | Gorai.001G027100.1 | .                  | .      |
| .                  | .                  | .                  | .                  | .                  | .      |
| .                  | .                  | .                  | .                  | .                  | .      |
| Vv11g0368          | Tc09_g009440       | .                  | .                  | Gorai.             | .      |
| 009G026500.1       | .                  | .                  | .                  | .                  | .      |
| .                  | .                  | .                  | .                  | .                  | .      |
| Vv11g0369          | .                  | .                  | .                  | .                  | .      |
| Vv04g0362          | Tc01_g015360       | .                  | .                  | .                  | .      |
| .                  | .                  | .                  | .                  | .                  | .      |
| Vv11g0370          | .                  | .                  | .                  | .                  | .      |
| Vv04g0363          | .                  | .                  | .                  | .                  | .      |
| Vv09g0385          | Tc06_g008150       | .                  | .                  | .                  | .      |
| Vv11g0371          | Tc09_g009460       | .                  | .                  | Gorai.004G280800.1 | .      |
| Gorai.009G026300.1 | .                  | .                  | .                  | .                  | .      |
| .                  | .                  | .                  | .                  | .                  | .      |
| .                  | .                  | .                  | .                  | .                  | .      |
| Vv11g0372          | Tc09_g009470       | .                  | .                  | Gorai.             | .      |
| 009G026200.1       | Gorai.010G073300.1 | .                  | .                  | .                  | .      |
| .                  | .                  | .                  | .                  | .                  | .      |
| .                  | .                  | .                  | .                  | .                  | .      |
| Vv11g0373          | Tc09_g009480       | .                  | Gorai.001G006600.1 | .                  | .      |
| Gorai.009G026100.1 | .                  | .                  | .                  | .                  | .      |
| .                  | .                  | .                  | .                  | .                  | .      |
| .                  | .                  | .                  | .                  | .                  | .      |
| Vv11g0374          | Tc09_g009510       | Gorai.013G230700.1 | .                  | .                  | .      |
| Gorai.009G026000.1 | .                  | .                  | .                  | .                  | .      |
| .                  | .                  | .                  | .                  | .                  | .      |
| .                  | .                  | .                  | .                  | .                  | .      |
| Vv11g0375          | Tc09_g009520       | .                  | .                  | Gorai.004G280600.1 | .      |
| .                  | .                  | .                  | .                  | .                  | .      |
| .                  | .                  | .                  | .                  | .                  | .      |
| Vv11g0376          | Tc09_g009530       | .                  | Gorai.001G006500.1 | .                  | .      |
| Gorai.009G025900.1 | Gorai.010G073200.1 | .                  | Vv04g0371          | .                  | .      |
| .                  | Gorai.001G006500.1 | .                  | .                  | .                  | .      |
| Gorai.011G074200.1 | .                  | .                  | .                  | .                  | .      |
| .                  | .                  | .                  | .                  | .                  | .      |
| Vv11g0377          | Tc09_g009550       | .                  | Gorai.001G006400.1 | .                  | .      |
| Gorai.004G280500.1 | .                  | Gorai.010G073100.1 | .                  | .                  | .      |

|                    |                    |   |                    |                    |           |        |   |
|--------------------|--------------------|---|--------------------|--------------------|-----------|--------|---|
| .                  | .                  | . | .                  | .                  | .         | .      | . |
| .                  | .                  | . | .                  | .                  | .         | .      | . |
| Vv11g0378          | .                  | . | .                  | .                  | .         | .      | . |
| .                  | .                  | . | .                  | .                  | .         | .      | . |
| Vv11g0379          | Tc09_g009560       | . | .                  | Gorai.001G006100.1 | .         | .      | . |
| .                  | .                  | . | .                  | .                  | .         | .      | . |
| Vv11g0380          | Tc09_g009570       | . | .                  | .                  | .         | Gorai. | . |
| 009G025800.1       | .                  | . | .                  | .                  | .         | .      | . |
| .                  | .                  | . | .                  | .                  | .         | .      | . |
| Vv11g0381          | Tc09_g009580       | . | .                  | Gorai.001G028000.1 | .         | .      | . |
| Gorai.009G060500.1 | .                  | . | Gorai.010G072900.1 | .                  | Vv04g0379 | .      | . |
| .                  | Gorai.001G028100.1 | . | .                  | .                  | .         | .      | . |
| .                  | .                  | . | .                  | .                  | .         | .      | . |
| Vv11g0382          | Tc09_g009590       | . | .                  | Gorai.001G006000.1 | .         | .      | . |
| Gorai.004G280400.1 | .                  | . | Gorai.010G072800.1 | .                  | .         | .      | . |
| .                  | .                  | . | .                  | .                  | .         | .      | . |
| .                  | .                  | . | .                  | .                  | .         | .      | . |
| Vv11g0383          | .                  | . | Gorai.001G028200.1 | .                  | .         | .      | . |
| .                  | Vv04g0382          | . | .                  | .                  | .         | .      | . |
| .                  | .                  | . | .                  | .                  | .         | .      | . |
| Vv11g0384          | .                  | . | .                  | .                  | .         | .      | . |
| .                  | .                  | . | .                  | .                  | .         | .      | . |
| .                  | .                  | . | .                  | .                  | .         | .      | . |
| Vv11g0385          | Tc09_g009600       | . | .                  | Gorai.001G005900.1 | .         | .      | . |
| .                  | Gorai.010G072700.1 | . | .                  | .                  | .         | .      | . |
| .                  | .                  | . | .                  | .                  | .         | .      | . |
| .                  | .                  | . | .                  | .                  | .         | .      | . |
| Vv11g0386          | Tc09_g009610       | . | .                  | .                  | .         | .      | . |
| Gorai.010G072600.1 | .                  | . | .                  | .                  | .         | .      | . |
| .                  | .                  | . | .                  | .                  | .         | .      | . |
| Vv11g0387          | Tc09_g009620       | . | Gorai.013G230800.1 | .                  | Gorai.    | .      | . |
| 001G005800.1       | Gorai.009G025700.1 | . | Gorai.010G072300.1 | .                  | .         | .      | . |
| .                  | .                  | . | .                  | .                  | .         | .      | . |
| .                  | .                  | . | .                  | .                  | .         | .      | . |
| Vv11g0388          | .                  | . | .                  | .                  | .         | .      | . |
| .                  | .                  | . | .                  | .                  | .         | .      | . |
| .                  | .                  | . | .                  | .                  | .         | .      | . |
| Vv11g0389          | Tc09_g009630       | . | .                  | .                  | Gorai.    | .      | . |
| 009G025600.1       | .                  | . | .                  | .                  | .         | .      | . |
| .                  | Vv09g0400          | . | .                  | .                  | .         | .      | . |
| .                  | .                  | . | .                  | .                  | .         | .      | . |
| Vv11g0390          | Tc09_g009640       | . | .                  | .                  | Gorai.    | .      | . |
| 009G025500.1       | .                  | . | .                  | .                  | .         | .      | . |
| .                  | .                  | . | .                  | .                  | .         | .      | . |
| Vv11g0391          | Tc09_g009670       | . | .                  | .                  | .         | .      | . |
| Gorai.010G072200.1 | .                  | . | .                  | .                  | .         | .      | . |
| .                  | .                  | . | .                  | .                  | .         | .      | . |
| Vv11g0392          | .                  | . | .                  | .                  | .         | .      | . |

|                    |                    |                    |                    |                    |
|--------------------|--------------------|--------------------|--------------------|--------------------|
| Vv11g0393          | Tc09_g009680       | .                  | .                  | Gorai.             |
| 009G025400.1       | Gorai.010G072100.1 | .                  | Vv04g0390          | .                  |
| .                  | Gorai.004G290800.1 | .                  | .                  | .                  |
| Vv11g0394          | Tc09_g009690       | .                  | .                  | Gorai.             |
| 009G025300.1       | .                  | .                  | .                  | .                  |
| Vv11g0395          | Tc09_g009700       | .                  | .                  | Gorai.004G280300.1 |
| .                  | .                  | .                  | .                  | .                  |
| Vv11g0396          | .                  | .                  | .                  | Gorai.009G025200.1 |
| .                  | .                  | .                  | .                  | .                  |
| Vv11g0397          | Tc09_g009720       | .                  | Gorai.001G005700.1 | .                  |
| Gorai.004G280200.1 | Gorai.009G025100.1 | .                  | Gorai.010G072000.1 | .                  |
| .                  | .                  | .                  | .                  | .                  |
| Vv11g0398          | Tc09_g009730       | .                  | .                  | Gorai.             |
| 009G025000.1       | .                  | .                  | .                  | .                  |
| Vv11g0399          | Tc09_g009740       | Gorai.013G230900.1 | .                  | Gorai.             |
| 001G005600.1       | .                  | .                  | .                  | .                  |
| .                  | .                  | .                  | .                  | .                  |
| Vv11g0400          | Tc09_g009750       | .                  | Gorai.001G005500.1 | .                  |
| .                  | .                  | .                  | .                  | .                  |
| Vv11g0401          | Tc09_g009770       | .                  | .                  | .                  |
| Gorai.010G071400.1 | .                  | .                  | .                  | .                  |
| Vv11g0402          | Tc09_g009780       | .                  | Gorai.001G005400.1 | .                  |
| Gorai.009G024900.1 | Gorai.010G071300.1 | .                  | .                  | .                  |
| .                  | .                  | .                  | .                  | .                  |
| Vv11g0403          | Tc09_g009820       | .                  | Gorai.001G028900.1 | .                  |
| Gorai.009G024800.1 | Gorai.010G071100.1 | .                  | Vv04g0396          | .                  |
| .                  | Gorai.001G028900.1 | .                  | Gorai.             | .                  |
| 009G052000.1       | Gorai.010G109400.1 | .                  | .                  | .                  |
| Vv11g0404          | Tc09_g009830       | .                  | Gorai.004G280100.1 | .                  |
| Gorai.009G024700.1 | Gorai.010G070900.1 | .                  | .                  | .                  |
| .                  | .                  | .                  | .                  | .                  |
| Vv11g0405          | .                  | .                  | .                  | .                  |
| Vv04g0427          | .                  | .                  | .                  | .                  |
| Vv11g0406          | Tc09_g009850       | .                  | Gorai.004G280000.1 | .                  |
| Gorai.009G024600.1 | .                  | .                  | .                  | .                  |

|                    |                    |   |                    |   |                    |   |
|--------------------|--------------------|---|--------------------|---|--------------------|---|
| .                  | .                  | . | Vv09g0419          | . | .                  | . |
| .                  | .                  | . | .                  | . | .                  | . |
| Vv11g0407          | .                  | . | .                  | . | .                  | . |
| .                  | .                  | . | .                  | . | Vv09g0420          | . |
| Tc06_g008550       | .                  | . | .                  | . | Gorai.011G075200.1 | . |
| .                  | .                  | . | .                  | . | .                  | . |
| Vv11g0408          | Tc09_g009860       | . | .                  | . | .                  | . |
| Gorai.010G070800.1 | .                  | . | .                  | . | .                  | . |
| .                  | .                  | . | .                  | . | .                  | . |
| Vv11g0409          | Tc09_g009870       | . | .                  | . | Gorai.004G279900.1 | . |
| Gorai.009G024400.1 | .                  | . | Gorai.010G070700.1 | . | .                  | . |
| .                  | .                  | . | .                  | . | Vv09g0423          | . |
| Tc06_g008590       | .                  | . | .                  | . | .                  | . |
| Vv11g0410          | .                  | . | .                  | . | .                  | . |
| .                  | .                  | . | .                  | . | .                  | . |
| .                  | .                  | . | .                  | . | .                  | . |
| Vv11g0411          | Tc09_g009890       | . | .                  | . | .                  | . |
| Gorai.010G070600.1 | .                  | . | .                  | . | .                  | . |
| .                  | .                  | . | .                  | . | .                  | . |
| Vv11g0412          | Tc09_g009900       | . | Gorai.001G005200.1 | . | .                  | . |
| .                  | Gorai.010G070400.1 | . | .                  | . | .                  | . |
| .                  | .                  | . | Vv09g0435          | . | .                  | . |
| .                  | .                  | . | .                  | . | .                  | . |
| Vv11g0413          | Tc09_g009920       | . | Gorai.001G005000.1 | . | .                  | . |
| Gorai.009G024300.1 | .                  | . | Gorai.010G070200.1 | . | .                  | . |
| .                  | .                  | . | .                  | . | .                  | . |
| .                  | .                  | . | .                  | . | .                  | . |
| Vv11g0414          | .                  | . | .                  | . | .                  | . |
| .                  | .                  | . | .                  | . | .                  | . |
| .                  | .                  | . | .                  | . | .                  | . |
| Vv11g0415          | Tc09_g009940       | . | Gorai.001G004800.1 | . | .                  | . |
| .                  | Gorai.010G069900.1 | . | .                  | . | .                  | . |
| .                  | .                  | . | Vv09g0439          | . | Tc06_g008690       | . |
| .                  | .                  | . | .                  | . | .                  | . |
| Vv11g0416          | Tc09_g009980       | . | .                  | . | Gorai.004G279600.1 | . |
| Gorai.009G024100.1 | .                  | . | .                  | . | .                  | . |
| .                  | .                  | . | .                  | . | .                  | . |
| .                  | .                  | . | .                  | . | .                  | . |
| Vv11g0417          | Tc09_g010000       | . | Gorai.001G004500.1 | . | .                  | . |
| .                  | .                  | . | .                  | . | .                  | . |
| .                  | .                  | . | .                  | . | .                  | . |
| Vv11g0418          | Tc09_g010030       | . | .                  | . | .                  | . |
| Gorai.010G069500.1 | .                  | . | .                  | . | .                  | . |
| .                  | .                  | . | .                  | . | .                  | . |
| Vv11g0419          | .                  | . | .                  | . | .                  | . |
| .                  | .                  | . | .                  | . | .                  | . |
| .                  | .                  | . | .                  | . | .                  | . |
| Vv11g0420          | .                  | . | .                  | . | .                  | . |
| .                  | .                  | . | .                  | . | .                  | . |
| .                  | .                  | . | .                  | . | .                  | . |

|                    |              |                    |                    |                    |           |
|--------------------|--------------|--------------------|--------------------|--------------------|-----------|
| Vv11g0421          | Tc09_g010040 | .                  | .                  | .                  | .         |
| Gorai.010G069400.1 | .            | .                  | .                  | .                  | .         |
| .                  | .            | .                  | .                  | .                  | .         |
| Vv11g0422          | Tc09_g010050 | .                  | .                  | .                  | Gorai.    |
| 009G023900.1       | .            | .                  | .                  | .                  | .         |
| .                  | .            | .                  | .                  | .                  | .         |
| Vv11g0423          | Tc09_g010070 | .                  | Gorai.001G004200.1 | .                  | .         |
| .                  | .            | .                  | .                  | .                  | .         |
| .                  | Vv09g0447    | Tc06_g010430       | .                  | .                  | .         |
| Gorai.011G076900.1 | .            | .                  | .                  | .                  | .         |
| Vv11g0424          | .            | .                  | Gorai.009G023800.1 | .                  | .         |
| .                  | .            | .                  | .                  | .                  | .         |
| .                  | .            | .                  | .                  | .                  | .         |
| Vv11g0425          | Tc09_g010080 | .                  | Gorai.001G004100.1 | .                  | .         |
| .                  | .            | .                  | .                  | .                  | .         |
| .                  | .            | .                  | .                  | .                  | .         |
| Vv11g0426          | .            | .                  | .                  | .                  | Vv09g0454 |
| .                  | .            | .                  | .                  | .                  | .         |
| .                  | .            | .                  | .                  | .                  | .         |
| Vv11g0427          | .            | .                  | .                  | .                  | .         |
| .                  | .            | .                  | .                  | .                  | .         |
| .                  | .            | .                  | .                  | .                  | .         |
| Vv11g0428          | .            | .                  | .                  | .                  | .         |
| .                  | .            | .                  | .                  | .                  | .         |
| .                  | .            | .                  | .                  | .                  | .         |
| Vv11g0429          | Tc09_g010090 | .                  | Gorai.001G004000.1 | .                  | .         |
| Gorai.009G023700.1 | .            | .                  | .                  | .                  | .         |
| .                  | .            | .                  | .                  | .                  | .         |
| .                  | .            | .                  | .                  | .                  | .         |
| Vv11g0430          | .            | .                  | .                  | .                  | .         |
| .                  | .            | .                  | .                  | .                  | .         |
| .                  | .            | .                  | .                  | .                  | .         |
| Vv11g0431          | Tc09_g010110 | .                  | Gorai.001G003900.1 | .                  | .         |
| Gorai.009G023600.1 | .            | .                  | .                  | .                  | .         |
| .                  | .            | .                  | .                  | .                  | .         |
| .                  | .            | .                  | .                  | .                  | .         |
| Vv11g0432          | Tc09_g010120 | .                  | .                  | Gorai.004G279500.1 | .         |
| Gorai.009G012100.1 | .            | Gorai.010G069100.1 | .                  | .                  | .         |
| .                  | .            | .                  | Vv09g0461          | .                  | .         |
| Tc06_g000240       | .            | Gorai.009G115200.1 | .                  | .                  | .         |
| Vv11g0433          | Tc09_g010130 | .                  | .                  | .                  | .         |
| .                  | .            | .                  | .                  | .                  | .         |
| .                  | .            | .                  | .                  | .                  | .         |
| Vv09g0462          | .            | .                  | .                  | .                  | .         |
| Vv11g0434          | Tc09_g010140 | .                  | Gorai.001G003800.1 | .                  | .         |
| Gorai.009G023400.1 | .            | .                  | .                  | .                  | .         |
| .                  | .            | .                  | .                  | .                  | .         |
| .                  | .            | .                  | .                  | .                  | .         |
| Vv11g0435          | .            | .                  | .                  | .                  | .         |
| .                  | .            | .                  | .                  | .                  | .         |
| .                  | .            | .                  | .                  | .                  | .         |



|                    |                    |                    |   |                    |        |
|--------------------|--------------------|--------------------|---|--------------------|--------|
| Vv11g0436          | Tc09_g010160       | .                  | . | .                  | Gorai. |
| 009G023200.1       | Vv04g0455          | .                  | . | .                  | .      |
| .                  | .                  | .                  | . | .                  | .      |
| .                  | .                  | .                  | . | .                  | .      |
| Vv11g0437          | .                  | .                  | . | .                  | .      |
| .                  | .                  | .                  | . | .                  | .      |
| .                  | .                  | .                  | . | .                  | .      |
| Vv11g0438          | Tc09_g010170       | .                  | . | .                  | Gorai. |
| 009G023100.1       | .                  | .                  | . | .                  | .      |
| .                  | .                  | .                  | . | .                  | .      |
| Vv11g0439          | .                  | .                  | . | .                  | .      |
| .                  | .                  | .                  | . | .                  | .      |
| .                  | .                  | .                  | . | .                  | .      |
| Vv11g0440          | Tc09_g010180       | .                  | . | .                  | Gorai. |
| 009G023000.1       | Gorai.010G069000.1 | .                  | . | .                  | .      |
| .                  | .                  | .                  | . | .                  | .      |
| .                  | .                  | .                  | . | .                  | .      |
| Vv11g0441          | .                  | .                  | . | .                  | .      |
| .                  | .                  | .                  | . | .                  | .      |
| .                  | .                  | .                  | . | .                  | .      |
| Vv11g0442          | Tc09_g010190       | Gorai.013G231000.1 | . | .                  | Gorai. |
| 001G003700.1       | .                  | .                  | . | .                  | .      |
| .                  | .                  | .                  | . | .                  | .      |
| .                  | .                  | .                  | . | .                  | .      |
| Vv11g0443          | Tc09_g010200       | .                  | . | Gorai.004G279400.1 | .      |
| .                  | .                  | .                  | . | .                  | .      |
| .                  | .                  | .                  | . | .                  | .      |
| Vv11g0444          | Tc09_g010210       | .                  | . | .                  | .      |
| .                  | .                  | .                  | . | .                  | .      |
| .                  | .                  | .                  | . | .                  | .      |
| Vv11g0445          | .                  | .                  | . | .                  | .      |
| .                  | .                  | .                  | . | .                  | .      |
| .                  | .                  | .                  | . | .                  | .      |
| Vv11g0446          | .                  | .                  | . | .                  | .      |
| .                  | .                  | .                  | . | .                  | .      |
| .                  | .                  | .                  | . | .                  | .      |
| Vv11g0447          | .                  | .                  | . | .                  | .      |
| .                  | .                  | .                  | . | .                  | .      |
| .                  | .                  | .                  | . | .                  | .      |
| Vv11g0448          | .                  | .                  | . | .                  | Gorai. |
| 010G068900.1       | .                  | .                  | . | .                  | .      |
| .                  | .                  | .                  | . | .                  | .      |
| Vv11g0449          | .                  | .                  | . | .                  | .      |
| .                  | .                  | .                  | . | .                  | .      |
| .                  | .                  | .                  | . | .                  | .      |
| Vv11g0450          | .                  | .                  | . | .                  | .      |
| .                  | .                  | .                  | . | .                  | .      |
| .                  | .                  | .                  | . | .                  | .      |
| Vv11g0451          | Tc09_g010230       | .                  | . | .                  | .      |
| Gorai.010G068800.1 | .                  | .                  | . | .                  | .      |

|                    |                    |                    |   |                    |   |        |   |
|--------------------|--------------------|--------------------|---|--------------------|---|--------|---|
| Vv11g0452          | .                  | .                  | . | .                  | . | .      | . |
| .                  | .                  | .                  | . | .                  | . | .      | . |
| Vv11g0453          | Tc09_g010260       | .                  | . | .                  | . | .      | . |
| .                  | .                  | .                  | . | .                  | . | .      | . |
| Vv11g0454          | Tc09_g010270       | .                  | . | .                  | . | Gorai. | . |
| 009G012000.1       | .                  | .                  | . | .                  | . | .      | . |
| Vv11g0455          | Tc09_g010280       | .                  | . | Gorai.001G003600.1 | . | .      | . |
| Gorai.009G022800.1 | .                  | .                  | . | .                  | . | .      | . |
| .                  | .                  | .                  | . | .                  | . | .      | . |
| Vv11g0456          | Tc09_g010290       | .                  | . | .                  | . | .      | . |
| .                  | .                  | .                  | . | .                  | . | .      | . |
| Vv11g0457          | Tc09_g010300       | .                  | . | .                  | . | .      | . |
| Gorai.010G068700.1 | Vv04g0492          | .                  | . | .                  | . | .      | . |
| .                  | .                  | .                  | . | .                  | . | .      | . |
| Vv11g0458          | .                  | .                  | . | .                  | . | .      | . |
| .                  | .                  | .                  | . | .                  | . | .      | . |
| Vv11g0459          | Tc09_g010330       | .                  | . | .                  | . | Gorai. | . |
| 009G022700.1       | Gorai.010G068600.1 | .                  | . | .                  | . | .      | . |
| .                  | .                  | .                  | . | .                  | . | .      | . |
| Vv11g0460          | .                  | .                  | . | .                  | . | .      | . |
| .                  | .                  | .                  | . | .                  | . | .      | . |
| Vv11g0461          | .                  | .                  | . | .                  | . | .      | . |
| .                  | .                  | .                  | . | .                  | . | .      | . |
| Vv11g0462          | Tc09_g010340       | .                  | . | .                  | . | .      | . |
| .                  | .                  | .                  | . | .                  | . | .      | . |
| Vv11g0463          | Tc09_g010350       | .                  | . | .                  | . | Gorai. | . |
| 009G011400.1       | .                  | .                  | . | .                  | . | .      | . |
| Vv11g0464          | .                  | .                  | . | .                  | . | .      | . |
| .                  | .                  | .                  | . | .                  | . | .      | . |
| Vv11g0465          | Tc09_g010360       | Gorai.013G231200.1 | . | Gorai.             | . | .      | . |
| 001G003300.1       | Gorai.004G279300.1 | .                  | . | Gorai.010G068500.1 | . | .      | . |
| .                  | .                  | .                  | . | .                  | . | .      | . |
| Vv11g0466          | Tc09_g010370       | .                  | . | Gorai.004G279200.1 | . | .      | . |
| .                  | .                  | .                  | . | .                  | . | .      | . |
| .                  | Vv09g0490          | Tc06_g007330       | . | .                  | . | .      | . |

|                    |                    |                    |                    |        |
|--------------------|--------------------|--------------------|--------------------|--------|
| Vv11g0467          | Tc09_g010380       | Gorai.013G231300.1 | .                  | .      |
|                    | Gorai.009G022600.1 | Gorai.010G068400.1 | .                  | .      |
| .                  | .                  | .                  | .                  | .      |
| Vv11g0468          | Tc09_g010390       | .                  | .                  | .      |
| Gorai.010G068300.1 | .                  | .                  | .                  | .      |
| .                  | .                  | .                  | .                  | .      |
| Vv11g0469          | .                  | .                  | .                  | .      |
| .                  | .                  | .                  | .                  | .      |
| Vv11g0470          | Tc09_g010400       | .                  | .                  | .      |
| Gorai.010G068100.1 | .                  | .                  | .                  | .      |
| .                  | .                  | .                  | .                  | .      |
| Vv11g0471          | Tc09_g010420       | .                  | .                  | Gorai. |
| 009G022400.1       | Gorai.010G067900.1 | .                  | .                  | .      |
| .                  | .                  | .                  | .                  | .      |
| Vv11g0472          | .                  | .                  | .                  | .      |
| .                  | .                  | .                  | .                  | .      |
| Vv11g0473          | Tc09_g010440       | .                  | .                  | .      |
| Gorai.010G067800.1 | .                  | .                  | .                  | .      |
| .                  | .                  | .                  | .                  | .      |
| Vv11g0474          | Tc09_g010450       | Gorai.013G231400.1 | .                  | .      |
| .                  | Gorai.010G067700.1 | .                  | .                  | .      |
| .                  | .                  | .                  | .                  | .      |
| Vv11g0475          | Tc09_g010460       | Gorai.013G231600.1 | Gorai.             | .      |
| 001G003200.1       | Gorai.004G278900.1 | Gorai.009G022300.1 | .                  | .      |
| Gorai.010G067400.1 | .                  | .                  | .                  | .      |
| .                  | .                  | .                  | .                  | .      |
| Vv11g0476          | Tc09_g010470       | .                  | .                  | Gorai. |
| 009G022200.1       | .                  | .                  | .                  | .      |
| .                  | .                  | .                  | .                  | .      |
| Vv11g0477          | Tc09_g010480       | .                  | Gorai.001G003100.1 | .      |
| .                  | .                  | .                  | .                  | .      |
| .                  | .                  | .                  | .                  | .      |
| Vv11g0478          | Tc09_g010550       | .                  | Gorai.001G002800.1 | .      |
| Gorai.009G022100.1 | .                  | Gorai.010G067300.1 | .                  | .      |
| .                  | .                  | .                  | .                  | .      |
| Vv11g0479          | Tc09_g010560       | .                  | .                  | Gorai. |
| 009G022000.1       | .                  | .                  | .                  | .      |
| .                  | .                  | .                  | .                  | .      |
| Vv11g0480          | Tc09_g010570       | .                  | .                  | Gorai. |
| 009G021900.1       | .                  | .                  | .                  | .      |
| .                  | .                  | .                  | .                  | .      |
| Vv11g0481          | .                  | .                  | .                  | .      |
| .                  | .                  | .                  | .                  | .      |

|                    |                    |                    |        |                    |   |
|--------------------|--------------------|--------------------|--------|--------------------|---|
| Vv11g0482          | Tc09_g010590       | .                  | .      | .                  | . |
| Gorai.010G066900.1 | .                  | .                  | .      | .                  | . |
| Vv11g0483          | .                  | .                  | .      | .                  | . |
| .                  | .                  | .                  | .      | .                  | . |
| Vv11g0484          | Tc09_g010600       | Gorai.013G232400.1 | .      | .                  | . |
| Gorai.004G278800.1 | Gorai.009G021600.1 | .                  | .      | .                  | . |
| .                  | .                  | .                  | .      | .                  | . |
| Vv11g0485          | Tc09_g010610       | .                  | .      | Gorai.             | . |
| 009G021500.1       | .                  | .                  | .      | .                  | . |
| Vv11g0486          | .                  | .                  | .      | .                  | . |
| .                  | .                  | .                  | .      | .                  | . |
| Vv11g0487          | Tc09_g010630       | .                  | .      | Gorai.             | . |
| 009G021100.1       | .                  | .                  | .      | .                  | . |
| Vv11g0488          | Tc09_g010640       | .                  | .      | Gorai.004G278700.1 | . |
| Gorai.009G021000.1 | Gorai.010G066800.1 | .                  | .      | .                  | . |
| .                  | .                  | .                  | .      | .                  | . |
| Vv11g0489          | Tc09_g010660       | .                  | .      | Gorai.004G278600.1 | . |
| Gorai.009G020900.1 | Gorai.010G066700.1 | .                  | .      | .                  | . |
| .                  | .                  | .                  | .      | .                  | . |
| Vv11g0490          | .                  | .                  | .      | .                  | . |
| .                  | .                  | .                  | .      | .                  | . |
| Vv11g0491          | Gorai.013G232700.1 | .                  | .      | .                  | . |
| .                  | .                  | .                  | .      | .                  | . |
| Vv11g0492          | Tc09_g010720       | .                  | .      | Gorai.             | . |
| 009G020600.1       | .                  | .                  | .      | .                  | . |
| Vv11g0493          | Tc09_g010730       | .                  | .      | Gorai.             | . |
| 009G010600.1       | Vv04g0512          | .                  | .      | .                  | . |
| Gorai.004G274500.1 | Vv09g0567          | .                  | .      | .                  | . |
| Tc06_g006590       | Gorai.010G227500.1 | .                  | .      | .                  | . |
| Vv11g0494          | Tc09_g010740       | Gorai.013G218200.1 | Gorai. | .                  | . |
| 001G002700.1       | Gorai.004G278500.1 | Gorai.010G066400.1 | .      | .                  | . |
| .                  | .                  | .                  | .      | .                  | . |
| Vv11g0495          | Tc09_g010750       | Gorai.013G232900.1 | .      | .                  | . |
| Gorai.004G278400.1 | Gorai.010G066300.1 | .                  | .      | .                  | . |
| .                  | .                  | .                  | .      | .                  | . |
| Vv11g0496          | Tc09_g010760       | .                  | .      | .                  | . |

|                    |                    |                    |                    |                    |   |   |
|--------------------|--------------------|--------------------|--------------------|--------------------|---|---|
| Gorai.010G066200.1 | .                  | .                  | .                  | .                  | . | . |
| Vv11g0497          | Tc09_g010770       | .                  | .                  | Gorai.004G278300.1 | . | . |
| .                  | Gorai.010G066100.1 | .                  | .                  | .                  | . | . |
| .                  | .                  | .                  | .                  | .                  | . | . |
| Vv11g0498          | Tc09_g010780       | .                  | Gorai.001G002600.1 | .                  | . | . |
| Gorai.004G278200.1 | .                  | Gorai.010G065800.1 | .                  | .                  | . | . |
| .                  | .                  | .                  | .                  | .                  | . | . |
| Vv11g0499          | .                  | .                  | .                  | .                  | . | . |
| .                  | .                  | .                  | .                  | .                  | . | . |
| .                  | .                  | .                  | .                  | .                  | . | . |
| Vv11g0500          | Tc09_g010790       | .                  | .                  | .                  | . | . |
| Gorai.010G065700.1 | Vv04g0518          | .                  | .                  | .                  | . | . |
| .                  | Gorai.011G080400.1 | .                  | .                  | .                  | . | . |
| .                  | .                  | .                  | .                  | .                  | . | . |
| Vv11g0501          | .                  | .                  | .                  | .                  | . | . |
| .                  | .                  | .                  | .                  | .                  | . | . |
| .                  | .                  | .                  | .                  | .                  | . | . |
| Vv11g0502          | Tc09_g010810       | .                  | .                  | Gorai.             | . | . |
| 009G020400.1       | .                  | .                  | .                  | .                  | . | . |
| .                  | .                  | .                  | .                  | .                  | . | . |
| Vv11g0503          | Tc09_g010820       | .                  | Gorai.001G002500.1 | .                  | . | . |
| .                  | Gorai.010G065600.1 | .                  | .                  | .                  | . | . |
| .                  | .                  | .                  | .                  | .                  | . | . |
| Vv11g0504          | .                  | .                  | .                  | .                  | . | . |
| .                  | .                  | .                  | .                  | .                  | . | . |
| .                  | .                  | .                  | .                  | .                  | . | . |
| Vv11g0505          | .                  | .                  | .                  | .                  | . | . |
| .                  | .                  | .                  | .                  | .                  | . | . |
| .                  | .                  | .                  | .                  | .                  | . | . |
| Vv11g0506          | Tc09_g010830       | Gorai.013G233000.1 | .                  | .                  | . | . |
| Gorai.009G020100.1 | Gorai.010G065500.1 | Vv04g0526          | .                  | .                  | . | . |
| .                  | Gorai.013G233000.1 | .                  | .                  | .                  | . | . |
| Gorai.011G080600.1 | Vv09g0581          | .                  | .                  | Gorai.             | . | . |
| 010G227200.1       | Gorai.009G129700.1 | Gorai.011G080600.1 | .                  | .                  | . | . |
| Vv11g0507          | Tc09_g010840       | Gorai.013G233100.1 | Gorai.             | .                  | . | . |
| 001G002400.1       | Gorai.009G020000.1 | .                  | .                  | .                  | . | . |
| .                  | .                  | .                  | .                  | .                  | . | . |
| .                  | .                  | .                  | .                  | .                  | . | . |
| Vv11g0508          | Tc09_g010880       | Gorai.001G001400.1 | .                  | .                  | . | . |
| Gorai.004G278000.1 | Gorai.009G019900.1 | .                  | Vv09g0585          | .                  | . | . |
| .                  | .                  | .                  | .                  | .                  | . | . |
| .                  | Gorai.009G129800.1 | .                  | .                  | .                  | . | . |
| Vv11g0509          | Tc09_g010890       | .                  | .                  | .                  | . | . |
| .                  | .                  | .                  | .                  | .                  | . | . |
| .                  | .                  | .                  | .                  | .                  | . | . |
| Vv11g0510          | .                  | .                  | .                  | .                  | . | . |

|                    |                    |                    |   |                    |   |                    |   |
|--------------------|--------------------|--------------------|---|--------------------|---|--------------------|---|
| .                  | .                  | .                  | . | .                  | . | .                  | . |
| .                  | .                  | .                  | . | .                  | . | .                  | . |
| Vv11g0511          | Tc09_g010900       | .                  | . | .                  | . | Gorai.             | . |
| 009G019800.1       | .                  | .                  | . | .                  | . | .                  | . |
| .                  | .                  | .                  | . | .                  | . | .                  | . |
| Vv11g0512          | Tc09_g010920       | .                  | . | .                  | . | Gorai.             | . |
| 009G019600.1       | .                  | .                  | . | .                  | . | .                  | . |
| .                  | .                  | .                  | . | .                  | . | .                  | . |
| Vv11g0513          | .                  | .                  | . | .                  | . | .                  | . |
| .                  | .                  | .                  | . | .                  | . | .                  | . |
| Vv11g0514          | .                  | .                  | . | .                  | . | Gorai.009G019400.1 | . |
| Gorai.010G065100.1 | .                  | .                  | . | .                  | . | .                  | . |
| .                  | .                  | .                  | . | .                  | . | .                  | . |
| .                  | .                  | .                  | . | .                  | . | .                  | . |
| Vv11g0515          | Tc09_g010960       | .                  | . | Gorai.001G040700.1 | . | .                  | . |
| .                  | .                  | .                  | . | .                  | . | .                  | . |
| .                  | Vv09g0595          | .                  | . | .                  | . | .                  | . |
| .                  | .                  | .                  | . | .                  | . | .                  | . |
| Vv11g0516          | Tc09_g010970       | Gorai.013G233600.1 | . | .                  | . | .                  | . |
| Gorai.004G277900.1 | .                  | .                  | . | .                  | . | .                  | . |
| .                  | .                  | .                  | . | .                  | . | .                  | . |
| .                  | .                  | .                  | . | .                  | . | .                  | . |
| Vv11g0517          | Tc09_g010980       | .                  | . | Gorai.001G040900.1 | . | .                  | . |
| Gorai.009G019200.1 | .                  | .                  | . | .                  | . | .                  | . |
| .                  | .                  | .                  | . | Vv09g0609          | . | .                  | . |
| .                  | .                  | .                  | . | .                  | . | .                  | . |
| Vv11g0518          | .                  | .                  | . | .                  | . | .                  | . |
| .                  | .                  | .                  | . | .                  | . | .                  | . |
| .                  | .                  | .                  | . | .                  | . | .                  | . |
| Vv11g0519          | Tc09_g011000       | .                  | . | Gorai.004G277800.1 | . | .                  | . |
| .                  | Gorai.010G064900.1 | .                  | . | .                  | . | .                  | . |
| .                  | .                  | .                  | . | .                  | . | .                  | . |
| .                  | .                  | .                  | . | .                  | . | .                  | . |
| Vv11g0520          | Tc09_g011030       | Gorai.013G233700.1 | . | .                  | . | .                  | . |
| .                  | .                  | .                  | . | .                  | . | .                  | . |
| .                  | .                  | .                  | . | .                  | . | .                  | . |
| Vv11g0521          | Tc09_g011040       | .                  | . | Gorai.001G041000.1 | . | .                  | . |
| .                  | Gorai.010G064800.1 | .                  | . | .                  | . | .                  | . |
| .                  | .                  | .                  | . | Vv09g0614          | . | .                  | . |
| .                  | .                  | .                  | . | .                  | . | .                  | . |
| Vv11g0522          | Tc09_g011050       | .                  | . | .                  | . | .                  | . |
| .                  | .                  | .                  | . | .                  | . | .                  | . |
| .                  | .                  | .                  | . | .                  | . | .                  | . |
| Vv11g0523          | .                  | .                  | . | .                  | . | .                  | . |
| .                  | .                  | .                  | . | .                  | . | .                  | . |
| .                  | .                  | .                  | . | .                  | . | .                  | . |
| Vv11g0524          | Tc09_g011060       | .                  | . | .                  | . | .                  | . |
| .                  | .                  | .                  | . | .                  | . | .                  | . |
| Vv09g0620          | .                  | .                  | . | .                  | . | .                  | . |

|                    |                    |                    |                    |                    |
|--------------------|--------------------|--------------------|--------------------|--------------------|
| Vv11g0525          | Tc09_g011070       | .                  | Gorai.001G041100.1 | .                  |
|                    | Gorai.009G019100.1 | .                  | .                  | .                  |
| .                  | .                  | .                  | .                  | .                  |
| Vv11g0526          | Tc09_g011080       | .                  | Gorai.001G041200.1 | .                  |
| Gorai.004G277700.1 | .                  | .                  | .                  | .                  |
| .                  | .                  | .                  | .                  | .                  |
| Vv11g0527          | Tc09_g011090       | .                  | Gorai.001G041300.1 | .                  |
| .                  | Gorai.010G064700.1 | .                  | .                  | .                  |
| .                  | .                  | .                  | .                  | .                  |
| Vv11g0528          | Tc09_g011100       | .                  | Gorai.001G041400.1 | .                  |
| Gorai.004G277600.1 | .                  | Gorai.010G064600.1 | .                  | .                  |
| .                  | .                  | .                  | .                  | .                  |
| Vv11g0529          | Tc09_g011110       | .                  | .                  | Gorai.             |
| 009G018600.1       | .                  | .                  | .                  | .                  |
| .                  | .                  | .                  | .                  | .                  |
| Vv11g0530          | Tc09_g011120       | .                  | .                  | Gorai.004G277500.1 |
| .                  | .                  | .                  | .                  | .                  |
| .                  | .                  | .                  | .                  | .                  |
| Vv11g0531          | Tc09_g011130       | Gorai.013G233800.1 | .                  | .                  |
| Gorai.009G010100.1 | .                  | Gorai.010G064500.1 | Vv04g0542          | .                  |
| .                  | Gorai.013G233800.1 | .                  | Gorai.004G274000.1 | .                  |
| .                  | Vv09g0626          | .                  | .                  | .                  |
| .                  | .                  | .                  | .                  | .                  |
| Vv11g0532          | Tc09_g011140       | .                  | Gorai.001G041500.1 | .                  |
| Gorai.009G010000.1 | .                  | .                  | .                  | .                  |
| .                  | .                  | .                  | .                  | .                  |
| Vv11g0533          | Tc09_g011170       | Gorai.013G233900.1 | .                  | .                  |
| Gorai.009G007300.1 | .                  | .                  | .                  | .                  |
| .                  | .                  | .                  | .                  | .                  |
| Vv11g0534          | Tc09_g011190       | .                  | .                  | .                  |
| Gorai.010G064400.1 | .                  | .                  | .                  | .                  |
| .                  | Vv09g0634          | .                  | .                  | Gorai.             |
| 009G130600.1       | Gorai.011G082100.1 | .                  | .                  | .                  |
| Vv11g0535          | Tc09_g011200       | .                  | Gorai.004G277400.1 | .                  |
| .                  | Gorai.010G064300.1 | .                  | .                  | .                  |
| .                  | .                  | .                  | .                  | .                  |
| Vv11g0536          | Tc09_g011220       | .                  | .                  | .                  |
| .                  | .                  | .                  | .                  | .                  |
| .                  | .                  | .                  | .                  | .                  |
| Vv11g0537          | .                  | .                  | .                  | .                  |
| .                  | .                  | .                  | .                  | .                  |
| .                  | .                  | .                  | .                  | .                  |
| Vv11g0538          | Tc09_g011230       | .                  | Gorai.001G041900.1 | .                  |

|                    |              |                    |   |                    |        |   |   |
|--------------------|--------------|--------------------|---|--------------------|--------|---|---|
| .                  | .            | .                  | . | .                  | .      | . | . |
| .                  | .            | .                  | . | .                  | .      | . | . |
| Vv11g0539          | .            | .                  | . | .                  | .      | . | . |
| .                  | .            | .                  | . | .                  | .      | . | . |
| .                  | .            | .                  | . | .                  | .      | . | . |
| Vv11g0540          | Tc09_g011240 | .                  | . | .                  | .      | . | . |
| Gorai.010G064200.1 | Vv04g0548    | .                  | . | Gorai.013G215400.1 | .      | . | . |
| .                  | .            | .                  | . | .                  | .      | . | . |
| .                  | .            | .                  | . | .                  | .      | . | . |
| Vv11g0541          | Tc09_g011250 | Gorai.013G215300.1 | . | .                  | .      | . | . |
| Gorai.009G057400.1 | .            | Vv04g0549          | . | .                  | .      | . | . |
| Gorai.013G215300.1 | .            | Gorai.009G057400.1 | . | .                  | .      | . | . |
| Gorai.010G114100.1 | .            | .                  | . | .                  | .      | . | . |
| .                  | .            | .                  | . | .                  | .      | . | . |
| Vv11g0542          | Tc09_g011260 | .                  | . | Gorai.004G277100.1 | .      | . | . |
| .                  | .            | .                  | . | .                  | .      | . | . |
| .                  | .            | .                  | . | .                  | .      | . | . |
| Vv11g0543          | .            | .                  | . | .                  | .      | . | . |
| .                  | .            | .                  | . | .                  | .      | . | . |
| .                  | .            | .                  | . | .                  | .      | . | . |
| Vv11g0544          | Tc09_g011290 | .                  | . | .                  | Gorai. | . | . |
| 009G017900.1       | .            | .                  | . | .                  | .      | . | . |
| .                  | .            | .                  | . | .                  | .      | . | . |
| Vv11g0545          | Tc09_g011300 | .                  | . | .                  | .      | . | . |
| .                  | .            | .                  | . | .                  | .      | . | . |
| .                  | .            | .                  | . | .                  | .      | . | . |
| Vv11g0546          | .            | .                  | . | .                  | .      | . | . |
| .                  | .            | .                  | . | .                  | .      | . | . |
| .                  | .            | .                  | . | .                  | .      | . | . |
| Vv11g0547          | .            | Gorai.001G042000.1 | . | .                  | .      | . | . |
| .                  | .            | .                  | . | .                  | .      | . | . |
| .                  | .            | .                  | . | .                  | .      | . | . |
| Vv11g0548          | Tc09_g011320 | .                  | . | .                  | .      | . | . |
| Gorai.010G064100.1 | .            | .                  | . | .                  | .      | . | . |
| .                  | .            | .                  | . | .                  | .      | . | . |
| Vv11g0549          | Tc09_g011330 | .                  | . | .                  | .      | . | . |
| Gorai.010G064000.1 | .            | .                  | . | .                  | .      | . | . |
| .                  | .            | .                  | . | .                  | .      | . | . |
| Vv11g0550          | Tc09_g011340 | Gorai.013G234000.1 | . | .                  | .      | . | . |
| .                  | .            | .                  | . | .                  | .      | . | . |
| .                  | .            | .                  | . | .                  | .      | . | . |
| Vv11g0551          | .            | .                  | . | .                  | .      | . | . |
| .                  | .            | .                  | . | .                  | .      | . | . |
| .                  | .            | .                  | . | .                  | .      | . | . |
| Vv11g0552          | .            | .                  | . | .                  | .      | . | . |
| .                  | .            | .                  | . | .                  | .      | . | . |
| .                  | .            | .                  | . | .                  | .      | . | . |
| Vv11g0553          | .            | .                  | . | .                  | .      | . | . |
| .                  | .            | .                  | . | .                  | .      | . | . |
| .                  | .            | .                  | . | .                  | .      | . | . |



|                    |                    |                    |   |                    |                    |           |
|--------------------|--------------------|--------------------|---|--------------------|--------------------|-----------|
| Vv11g0554          | .                  | .                  | . | .                  | .                  | Gorai.    |
| 010G063900.1       | Vv04g0555          | .                  | . | Gorai.013G234000.1 | .                  | .         |
| .                  | .                  | Gorai.010G114400.1 | . | .                  | .                  | .         |
| .                  | .                  | .                  | . | .                  | .                  | .         |
| Vv11g0555          | Tc09_g011350       | .                  | . | Gorai.013G234100.1 | .                  | .         |
| .                  | Gorai.009G017800.1 | .                  | . | Gorai.010G063800.1 | .                  | .         |
| .                  | .                  | .                  | . | .                  | .                  | .         |
| Vv11g0556          | .                  | .                  | . | .                  | .                  | .         |
| .                  | .                  | .                  | . | .                  | .                  | .         |
| .                  | .                  | .                  | . | .                  | .                  | .         |
| Vv11g0557          | Tc09_g011360       | .                  | . | .                  | .                  | Gorai.    |
| 009G017700.1       | .                  | .                  | . | .                  | .                  | .         |
| .                  | .                  | .                  | . | .                  | .                  | .         |
| Vv11g0558          | Tc09_g011370       | .                  | . | Gorai.001G042100.1 | .                  | .         |
| .                  | Gorai.009G017600.1 | .                  | . | Vv04g0565          | .                  | .         |
| .                  | Gorai.001G042100.1 | .                  | . | .                  | Gorai.011G082600.1 | .         |
| .                  | Vv09g0648          | Tc06_g001600       | . | .                  | Gorai.             | .         |
| 009G130800.1       | Gorai.011G082600.1 | .                  | . | .                  | .                  | .         |
| Vv11g0559          | .                  | .                  | . | .                  | .                  | .         |
| .                  | .                  | .                  | . | .                  | .                  | .         |
| .                  | .                  | .                  | . | .                  | .                  | .         |
| Vv11g0560          | Tc09_g011380       | .                  | . | Gorai.001G033200.1 | .                  | .         |
| .                  | Gorai.009G017500.1 | .                  | . | .                  | .                  | .         |
| .                  | .                  | .                  | . | .                  | .                  | .         |
| .                  | .                  | .                  | . | .                  | .                  | .         |
| Vv11g0561          | Tc09_g011390       | .                  | . | .                  | .                  | Gorai.    |
| 009G017400.1       | .                  | .                  | . | .                  | .                  | .         |
| .                  | .                  | .                  | . | .                  | .                  | .         |
| Vv11g0562          | .                  | .                  | . | .                  | .                  | .         |
| .                  | .                  | .                  | . | .                  | .                  | .         |
| .                  | .                  | .                  | . | .                  | .                  | .         |
| Vv11g0563          | .                  | .                  | . | .                  | .                  | .         |
| .                  | .                  | .                  | . | .                  | .                  | .         |
| .                  | .                  | .                  | . | .                  | .                  | .         |
| Vv11g0564          | .                  | .                  | . | .                  | .                  | .         |
| .                  | .                  | .                  | . | .                  | .                  | Vv09g0652 |
| .                  | Tc06_g001640       | .                  | . | Gorai.010G225600.1 | .                  | .         |
| Gorai.011G083000.1 | .                  | .                  | . | .                  | .                  | .         |
| Vv11g0565          | .                  | .                  | . | .                  | .                  | .         |
| .                  | .                  | .                  | . | .                  | .                  | .         |
| .                  | .                  | .                  | . | .                  | .                  | .         |
| Vv11g0566          | .                  | .                  | . | .                  | .                  | .         |
| .                  | .                  | .                  | . | .                  | .                  | .         |
| .                  | .                  | .                  | . | .                  | .                  | .         |
| Vv11g0567          | Tc09_g011400       | .                  | . | Gorai.001G033300.1 | .                  | .         |
| .                  | Gorai.009G057800.1 | .                  | . | Vv04g0569          | .                  | .         |
| .                  | Gorai.001G042400.1 | .                  | . | Gorai.009G057800.1 | .                  | .         |
| Gorai.011G083000.1 | .                  | .                  | . | .                  | .                  | .         |
| .                  | .                  | .                  | . | .                  | .                  | .         |

|                    |                    |                    |        |                    |   |   |   |
|--------------------|--------------------|--------------------|--------|--------------------|---|---|---|
| Vv11g0568          | .                  | .                  | .      | .                  | . | . | . |
| .                  | .                  | .                  | .      | .                  | . | . | . |
| Vv11g0569          | Tc09_g011420       | .                  | .      | .                  | . | . | . |
| Gorai.010G063500.1 | .                  | .                  | .      | .                  | . | . | . |
| .                  | .                  | .                  | .      | .                  | . | . | . |
| Vv11g0570          | .                  | .                  | .      | .                  | . | . | . |
| .                  | .                  | .                  | .      | .                  | . | . | . |
| Vv11g0571          | Tc09_g011440       | Gorai.013G215000.1 | Gorai. | .                  | . | . | . |
| 001G033400.1       | Gorai.004G276800.1 | Gorai.009G058000.1 | .      | .                  | . | . | . |
| .                  | .                  | .                  | .      | .                  | . | . | . |
| Vv11g0572          | Tc09_g011460       | .                  | .      | .                  | . | . | . |
| Gorai.010G063300.1 | .                  | .                  | .      | .                  | . | . | . |
| .                  | .                  | .                  | .      | .                  | . | . | . |
| Vv11g0573          | Tc09_g011490       | Gorai.013G234200.1 | Gorai. | .                  | . | . | . |
| 001G033500.1       | Gorai.009G016900.1 | Gorai.010G063200.1 | .      | .                  | . | . | . |
| .                  | .                  | .                  | .      | .                  | . | . | . |
| Vv09g0659          | Tc06_g001700       | .                  | .      | Gorai.009G131300.1 | . | . | . |
| .                  | .                  | .                  | .      | .                  | . | . | . |
| Vv11g0574          | .                  | .                  | .      | .                  | . | . | . |
| .                  | .                  | .                  | .      | .                  | . | . | . |
| Vv11g0575          | Tc09_g011500       | Gorai.013G234300.1 | .      | .                  | . | . | . |
| .                  | Gorai.010G063100.1 | .                  | .      | .                  | . | . | . |
| .                  | .                  | Vv09g0660          | .      | .                  | . | . | . |
| .                  | .                  | .                  | .      | .                  | . | . | . |
| Vv11g0576          | Gorai.013G214800.1 | Gorai.001G033600.1 | .      | .                  | . | . | . |
| .                  | Gorai.009G058200.1 | Vv04g0573          | .      | .                  | . | . | . |
| Gorai.013G185900.1 | Gorai.001G033600.1 | .                  | .      | .                  | . | . | . |
| Gorai.009G058200.1 | Gorai.010G115100.1 | .                  | .      | .                  | . | . | . |
| .                  | .                  | .                  | .      | .                  | . | . | . |
| Vv11g0577          | Tc09_g011540       | .                  | .      | .                  | . | . | . |
| Gorai.010G063000.1 | .                  | .                  | .      | .                  | . | . | . |
| .                  | .                  | .                  | .      | .                  | . | . | . |
| Vv11g0578          | .                  | .                  | .      | .                  | . | . | . |
| .                  | .                  | .                  | .      | .                  | . | . | . |
| Vv11g0579          | .                  | .                  | .      | .                  | . | . | . |
| .                  | .                  | .                  | .      | .                  | . | . | . |
| Vv11g0580          | .                  | .                  | .      | .                  | . | . | . |
| .                  | .                  | .                  | .      | .                  | . | . | . |
| Vv11g0581          | Tc09_g031810       | Gorai.013G212100.1 | .      | .                  | . | . | . |
| .                  | .                  | .                  | .      | .                  | . | . | . |
| Vv11g0582          | .                  | Gorai.004G276600.1 | .      | .                  | . | . | . |
| .                  | .                  | .                  | .      | .                  | . | . | . |

|                    |                    |                    |                    |                    |        |
|--------------------|--------------------|--------------------|--------------------|--------------------|--------|
| Vv11g0583          | .                  | .                  | Gorai.001G033800.1 | .                  | .      |
| Gorai.009G058400.1 | .                  | .                  | Vv04g0577          | .                  | Gorai. |
| 013G234700.1       | Gorai.001G033800.1 | .                  | .                  | Gorai.009G058400.1 | .      |
| Gorai.010G115300.1 | .                  | .                  | .                  | .                  | .      |
| Vv11g0584          | Tc09_g011650       | .                  | .                  | .                  | .      |
| .                  | .                  | .                  | .                  | .                  | .      |
| Vv11g0585          | Tc09_g011660       | Gorai.013G234400.1 | .                  | .                  | .      |
| Gorai.009G016500.1 | .                  | .                  | .                  | .                  | .      |
| .                  | .                  | .                  | .                  | .                  | .      |
| Vv11g0586          | Tc09_g011670       | Gorai.013G234500.1 | .                  | .                  | .      |
| Gorai.009G016300.1 | Gorai.010G062600.1 | .                  | .                  | .                  | .      |
| .                  | .                  | .                  | .                  | .                  | .      |
| Vv11g0587          | Tc09_g031660       | .                  | .                  | .                  | .      |
| .                  | .                  | .                  | .                  | .                  | .      |
| Vv09g0666          | Tc06_g001730       | .                  | .                  | Gorai.             | .      |
| 011G084000.1       | .                  | .                  | .                  | .                  | .      |
| Vv11g0588          | .                  | .                  | .                  | .                  | .      |
| .                  | .                  | .                  | .                  | .                  | .      |
| Vv11g0589          | .                  | Gorai.001G043000.1 | .                  | .                  | .      |
| .                  | .                  | .                  | .                  | .                  | .      |
| Vv11g0590          | .                  | .                  | .                  | .                  | .      |
| .                  | .                  | .                  | .                  | .                  | .      |
| Vv11g0591          | .                  | .                  | .                  | .                  | .      |
| .                  | .                  | .                  | .                  | .                  | .      |
| Vv11g0592          | .                  | .                  | .                  | .                  | .      |
| .                  | .                  | .                  | .                  | .                  | .      |
| Vv11g0593          | .                  | .                  | .                  | .                  | .      |
| .                  | .                  | .                  | .                  | .                  | .      |
| Vv11g0594          | .                  | Gorai.001G043700.1 | .                  | .                  | .      |
| .                  | .                  | .                  | .                  | .                  | .      |
| Vv11g0595          | .                  | .                  | .                  | .                  | .      |
| .                  | .                  | .                  | .                  | .                  | .      |
| Vv11g0596          | Tc09_g011740       | .                  | .                  | Gorai.             | .      |
| 009G059700.1       | Gorai.010G062200.1 | .                  | .                  | .                  | .      |
| .                  | .                  | .                  | .                  | .                  | .      |
| Vv11g0597          | Tc09_g011760       | .                  | Gorai.001G043800.1 | .                  | .      |

|                    |                    |                    |   |   |                    |   |   |
|--------------------|--------------------|--------------------|---|---|--------------------|---|---|
| .                  | .                  | .                  | . | . | .                  | . | . |
| .                  | .                  | .                  | . | . | .                  | . | . |
| Vv11g0598          | .                  | .                  | . | . | .                  | . | . |
| .                  | .                  | .                  | . | . | .                  | . | . |
| Vv11g0599          | .                  | .                  | . | . | .                  | . | . |
| .                  | .                  | .                  | . | . | .                  | . | . |
| Vv11g0600          | .                  | .                  | . | . | .                  | . | . |
| .                  | .                  | .                  | . | . | .                  | . | . |
| Vv11g0601          | .                  | .                  | . | . | .                  | . | . |
| .                  | .                  | .                  | . | . | .                  | . | . |
| Vv11g0602          | .                  | .                  | . | . | .                  | . | . |
| .                  | .                  | .                  | . | . | .                  | . | . |
| Vv11g0603          | .                  | .                  | . | . | Gorai.004G276400.1 | . | . |
| Gorai.009G016100.1 | .                  | .                  | . | . | .                  | . | . |
| .                  | .                  | .                  | . | . | .                  | . | . |
| Vv11g0604          | .                  | .                  | . | . | .                  | . | . |
| .                  | .                  | .                  | . | . | .                  | . | . |
| Vv11g0605          | Tc09_g011800       | .                  | . | . | .                  | . | . |
| .                  | .                  | .                  | . | . | .                  | . | . |
| Vv11g0606          | Tc09_g011810       | .                  | . | . | .                  | . | . |
| Gorai.010G061900.1 | .                  | .                  | . | . | .                  | . | . |
| .                  | .                  | .                  | . | . | .                  | . | . |
| Vv11g0607          | .                  | .                  | . | . | .                  | . | . |
| .                  | .                  | .                  | . | . | .                  | . | . |
| Vv11g0608          | Tc09_g011820       | .                  | . | . | Gorai.001G034200.1 | . | . |
|                    | Gorai.009G016000.1 | .                  | . | . | Vv04g0583          | . | . |
|                    | Gorai.001G034200.1 | .                  | . | . | .                  | . | . |
| .                  | .                  | .                  | . | . | .                  | . | . |
| Vv11g0609          | .                  | .                  | . | . | .                  | . | . |
| .                  | .                  | .                  | . | . | .                  | . | . |
| Vv11g0610          | Tc09_g011840       | .                  | . | . | Gorai.001G044200.1 | . | . |
|                    | Gorai.009G015800.1 | .                  | . | . | .                  | . | . |
| .                  | .                  | .                  | . | . | .                  | . | . |
| Vv11g0611          | Tc09_g011850       | Gorai.013G234800.1 | . | . | .                  | . | . |
|                    | Gorai.009G015700.1 | .                  | . | . | .                  | . | . |
| .                  | .                  | .                  | . | . | .                  | . | . |
| Vv11g0612          | .                  | .                  | . | . | .                  | . | . |
| .                  | .                  | .                  | . | . | .                  | . | . |

|                    |                    |                    |                    |                    |        |   |
|--------------------|--------------------|--------------------|--------------------|--------------------|--------|---|
| Vv11g0613          | .                  | .                  | .                  | Gorai.004G107300.1 | .      | . |
|                    | Gorai.010G061600.1 | .                  | .                  | .                  | .      | . |
| .                  | .                  | .                  | .                  | .                  | .      | . |
| Vv11g0614          | Tc09_g011880       | .                  | .                  | .                  | Gorai. | . |
| 009G015600.1       | .                  | .                  | .                  | .                  | .      | . |
| .                  | .                  | .                  | .                  | .                  | .      | . |
| Vv11g0615          | Tc09_g011890       | .                  | Gorai.004G107400.1 | .                  | .      | . |
| .                  | .                  | .                  | .                  | .                  | .      | . |
| .                  | .                  | .                  | .                  | .                  | .      | . |
| Vv11g0616          | Tc09_g011920       | Gorai.013G235200.1 | .                  | .                  | .      | . |
| .                  | .                  | .                  | .                  | .                  | .      | . |
| .                  | .                  | .                  | .                  | .                  | .      | . |
| Vv11g0617          | .                  | Gorai.013G218200.1 | Gorai.001G029400.1 | .                  | .      | . |
| .                  | .                  | .                  | .                  | .                  | .      | . |
| .                  | .                  | .                  | .                  | .                  | .      | . |
| Vv11g0618          | Tc09_g011930       | Gorai.013G235300.1 | Gorai.             | .                  | .      | . |
| 004G107500.1       | .                  | .                  | .                  | .                  | .      | . |
| .                  | .                  | .                  | .                  | .                  | .      | . |
| .                  | .                  | .                  | .                  | .                  | .      | . |
| Vv11g0619          | .                  | .                  | .                  | .                  | .      | . |
| .                  | .                  | .                  | .                  | .                  | .      | . |
| .                  | .                  | .                  | .                  | .                  | .      | . |
| Vv11g0620          | Tc09_g011940       | .                  | Gorai.004G107700.1 | .                  | .      | . |
| Gorai.004G275600.1 | Gorai.009G015500.1 | .                  | Vv04g0590          | .                  | .      | . |
| Tc01_g038070       | Gorai.013G214600.1 | Gorai.001G034700.1 | .                  | .                  | .      | . |
| .                  | .                  | .                  | .                  | .                  | .      | . |
| .                  | .                  | .                  | .                  | .                  | .      | . |
| Vv11g0621          | Tc09_g011950       | .                  | Gorai.001G034800.1 | .                  | .      | . |
| Gorai.009G058900.1 | Gorai.010G061200.1 | Vv04g0592          | .                  | .                  | .      | . |
| Tc09_g003010       | Gorai.013G214400.1 | Gorai.001G034800.1 | .                  | .                  | .      | . |
| .                  | Gorai.009G058900.1 | .                  | .                  | .                  | .      | . |
| .                  | .                  | .                  | .                  | .                  | .      | . |
| Vv11g0622          | Tc09_g011990       | .                  | Gorai.004G274700.1 | .                  | .      | . |
| .                  | .                  | .                  | .                  | .                  | .      | . |
| .                  | .                  | .                  | .                  | .                  | .      | . |
| Vv11g0623          | Tc09_g012000       | .                  | .                  | Gorai.             | .      | . |
| 009G059000.1       | Gorai.010G061000.1 | Vv04g0595          | .                  | .                  | .      | . |
| .                  | Gorai.009G059000.1 | .                  | Vv09g0671          | .                  | .      | . |
| .                  | .                  | .                  | .                  | .                  | .      | . |
| .                  | .                  | .                  | .                  | .                  | .      | . |
| Vv11g0624          | .                  | .                  | .                  | .                  | .      | . |
| .                  | .                  | .                  | .                  | .                  | .      | . |
| .                  | .                  | .                  | .                  | .                  | .      | . |
| Vv11g0625          | Tc09_g012010       | .                  | .                  | .                  | .      | . |
| Gorai.010G060900.1 | .                  | .                  | .                  | .                  | .      | . |
| .                  | .                  | .                  | .                  | .                  | .      | . |
| .                  | .                  | .                  | .                  | .                  | .      | . |
| Vv11g0626          | Tc09_g012020       | .                  | Gorai.004G271900.1 | .                  | .      | . |
| Gorai.009G058500.1 | Gorai.010G060800.1 | .                  | .                  | .                  | .      | . |

|                    |              |                    |
|--------------------|--------------|--------------------|
| Vv11g0627          | Tc09_g012030 | Gorai.004G107900.1 |
| Vv11g0628          |              |                    |
| Vv11g0629          |              |                    |
| Vv11g0630          |              | Gorai.             |
| 010G058500.1       |              |                    |
| Vv11g0631          |              |                    |
| Vv11g0632          |              |                    |
| Vv11g0633          |              |                    |
| Vv11g0634          |              |                    |
| Vv11g0635          |              |                    |
| Vv04g0609          |              | Gorai.001G037200.1 |
| Gorai.009G061900.1 |              |                    |
| Vv11g0636          |              |                    |
| Vv11g0637          |              |                    |
| Vv04g0611          | Tc01_g002260 | Gorai.001G031700.1 |
| Gorai.009G061700.1 |              |                    |
| Vv11g0638          |              | Gorai.004G291600.1 |
| Vv11g0639          |              |                    |
| Vv11g0640          |              |                    |
| Vv11g0641          |              |                    |
| Vv11g0642          |              | Gorai.001G031500.1 |

|                    |              |                    |                    |   |
|--------------------|--------------|--------------------|--------------------|---|
| Gorai.009G061200.1 | .            | Vv04g0617          | Tc09_g027670       | . |
| Gorai.001G031500.1 | .            | Gorai.009G061200.1 | .                  | . |
| Vv11g0643          | .            | Gorai.013G217200.1 | .                  | . |
| Vv11g0644          | .            | .                  | .                  | . |
| Vv11g0645          | .            | .                  | .                  | . |
| Vv11g0646          | Tc09_g005290 | Gorai.001G032200.1 | .                  | . |
| Vv11g0647          | .            | Gorai.013G216100.1 | .                  | . |
| Gorai.009G057100.1 | .            | .                  | .                  | . |
| Vv11g0648          | .            | .                  | Gorai.009G057000.1 | . |
| Vv11g0649          | .            | .                  | .                  | . |
| Vv11g0650          | .            | Gorai.013G216000.1 | Gorai.001G032300.1 | . |
| Vv11g0651          | .            | .                  | Gorai.004G291800.1 | . |
| Vv11g0652          | .            | .                  | .                  | . |
| Vv11g0653          | .            | .                  | .                  | . |
| Vv11g0654          | .            | Gorai.013G215900.1 | .                  | . |
| Gorai.009G063000.1 | .            | .                  | .                  | . |
| Vv11g0655          | .            | .                  | .                  | . |
| Vv11g0656          | .            | Gorai.013G215800.1 | .                  | . |
| Gorai.009G056700.1 | .            | .                  | .                  | . |
| Vv11g0657          | .            | .                  | .                  | . |

|                    |   |   |   |                    |                    |   |   |
|--------------------|---|---|---|--------------------|--------------------|---|---|
| .                  | . | . | . | .                  | .                  | . | . |
| Vv11g0658          | . | . | . | .                  | Gorai.009G056600.1 | . | . |
| .                  | . | . | . | .                  | .                  | . | . |
| Vv11g0659          | . | . | . | .                  | Gorai.004G291900.1 | . | . |
| .                  | . | . | . | .                  | .                  | . | . |
| Vv11g0660          | . | . | . | .                  | .                  | . | . |
| .                  | . | . | . | .                  | .                  | . | . |
| Vv11g0661          | . | . | . | .                  | .                  | . | . |
| .                  | . | . | . | .                  | .                  | . | . |
| Vv11g0662          | . | . | . | .                  | .                  | . | . |
| .                  | . | . | . | .                  | .                  | . | . |
| Vv11g0663          | . | . | . | Gorai.001G038300.1 | .                  | . | . |
| Gorai.009G063200.1 | . | . | . | .                  | .                  | . | . |
| .                  | . | . | . | .                  | .                  | . | . |
| Vv11g0664          | . | . | . | .                  | .                  | . | . |
| .                  | . | . | . | .                  | .                  | . | . |
| Vv11g0665          | . | . | . | .                  | .                  | . | . |
| .                  | . | . | . | .                  | .                  | . | . |
| Vv11g0666          | . | . | . | Gorai.001G032400.1 | .                  | . | . |
| .                  | . | . | . | .                  | .                  | . | . |
| Vv11g0667          | . | . | . | .                  | Gorai.004G292100.1 | . | . |
| .                  | . | . | . | .                  | .                  | . | . |
| Vv11g0668          | . | . | . | .                  | .                  | . | . |
| .                  | . | . | . | .                  | .                  | . | . |
| Vv11g0669          | . | . | . | .                  | .                  | . | . |
| .                  | . | . | . | .                  | .                  | . | . |
| Vv11g0670          | . | . | . | .                  | .                  | . | . |
| .                  | . | . | . | .                  | .                  | . | . |
| Vv11g0671          | . | . | . | .                  | .                  | . | . |
| .                  | . | . | . | .                  | .                  | . | . |
| Vv11g0672          | . | . | . | .                  | .                  | . | . |
| .                  | . | . | . | .                  | .                  | . | . |
| Vv11g0673          | . | . | . | .                  | .                  | . | . |
| .                  | . | . | . | .                  | .                  | . | . |



|                    |                    |                    |                    |   |                    |        |   |
|--------------------|--------------------|--------------------|--------------------|---|--------------------|--------|---|
| Vv11g0674          | .                  | .                  | .                  | . | .                  | .      | . |
| .                  | .                  | .                  | .                  | . | .                  | .      | . |
| Vv11g0675          | .                  | .                  | Gorai.001G032800.1 | . | .                  | Gorai. | . |
| 004G292200.1       | Gorai.009G056200.1 | .                  | .                  | . | .                  | .      | . |
| .                  | .                  | .                  | .                  | . | .                  | .      | . |
| Vv11g0676          | .                  | .                  | Gorai.001G032900.1 | . | .                  | .      | . |
| .                  | .                  | .                  | .                  | . | .                  | .      | . |
| Vv11g0677          | .                  | .                  | .                  | . | Gorai.009G056100.1 | .      | . |
| .                  | .                  | .                  | .                  | . | .                  | .      | . |
| Vv11g0678          | .                  | .                  | .                  | . | .                  | .      | . |
| .                  | .                  | .                  | .                  | . | .                  | .      | . |
| Vv11g0679          | Tc09_g005640       | .                  | .                  | . | .                  | Gorai. | . |
| 009G056000.1       | .                  | .                  | .                  | . | .                  | .      | . |
| .                  | .                  | .                  | .                  | . | .                  | .      | . |
| Vv11g0680          | .                  | Gorai.013G214400.1 | .                  | . | .                  | .      | . |
| Gorai.009G055900.1 | .                  | .                  | .                  | . | .                  | .      | . |
| .                  | .                  | .                  | .                  | . | .                  | .      | . |
| Vv11g0681          | .                  | .                  | .                  | . | .                  | .      | . |
| .                  | .                  | .                  | .                  | . | .                  | .      | . |
| Vv11g0682          | Tc09_g014730       | Gorai.013G241400.1 | .                  | . | .                  | .      | . |
| .                  | .                  | .                  | .                  | . | .                  | .      | . |
| Vv11g0683          | .                  | .                  | .                  | . | .                  | .      | . |
| .                  | .                  | .                  | .                  | . | .                  | .      | . |
| Vv11g0684          | Tc09_g014720       | Gorai.013G241300.1 | .                  | . | .                  | .      | . |
| Gorai.004G273900.1 | Gorai.009G009800.1 | .                  | .                  | . | .                  | .      | . |
| .                  | .                  | .                  | .                  | . | .                  | .      | . |
| Vv11g0685          | .                  | .                  | .                  | . | .                  | .      | . |
| .                  | .                  | .                  | .                  | . | .                  | .      | . |
| Vv11g0686          | Tc09_g014710       | .                  | .                  | . | .                  | .      | . |
| .                  | .                  | .                  | .                  | . | .                  | .      | . |
| Vv11g0687          | .                  | .                  | .                  | . | .                  | .      | . |
| .                  | .                  | .                  | .                  | . | .                  | .      | . |
| Vv11g0688          | Tc09_g014700       | .                  | .                  | . | .                  | .      | . |
| .                  | .                  | .                  | .                  | . | .                  | .      | . |
| Vv11g0689          | Tc09_g014690       | .                  | .                  | . | .                  | Gorai. | . |

|                    |              |   |   |   |   |                    |   |
|--------------------|--------------|---|---|---|---|--------------------|---|
| 009G009700.1       | .            | . | . | . | . | .                  | . |
| .                  | .            | . | . | . | . | .                  | . |
| Vv11g0690          | Tc09_g014680 | . | . | . | . | Gorai.             | . |
| 009G009600.1       | .            | . | . | . | . | .                  | . |
| .                  | .            | . | . | . | . | .                  | . |
| Vv11g0691          | Tc09_g014670 | . | . | . | . | Gorai.004G273800.1 | . |
| .                  | .            | . | . | . | . | .                  | . |
| .                  | .            | . | . | . | . | .                  | . |
| Vv11g0692          | .            | . | . | . | . | .                  | . |
| .                  | .            | . | . | . | . | .                  | . |
| .                  | .            | . | . | . | . | .                  | . |
| Vv11g0693          | .            | . | . | . | . | .                  | . |
| .                  | .            | . | . | . | . | .                  | . |
| .                  | .            | . | . | . | . | .                  | . |
| Vv11g0694          | .            | . | . | . | . | .                  | . |
| .                  | .            | . | . | . | . | .                  | . |
| .                  | .            | . | . | . | . | .                  | . |
| Vv11g0695          | .            | . | . | . | . | .                  | . |
| .                  | .            | . | . | . | . | .                  | . |
| .                  | .            | . | . | . | . | .                  | . |
| Vv11g0696          | .            | . | . | . | . | .                  | . |
| .                  | .            | . | . | . | . | .                  | . |
| .                  | .            | . | . | . | . | .                  | . |
| Vv11g0697          | .            | . | . | . | . | .                  | . |
| .                  | .            | . | . | . | . | .                  | . |
| .                  | .            | . | . | . | . | .                  | . |
| Vv11g0698          | .            | . | . | . | . | .                  | . |
| .                  | .            | . | . | . | . | .                  | . |
| .                  | .            | . | . | . | . | .                  | . |
| Vv11g0699          | Tc09_g014570 | . | . | . | . | .                  | . |
| .                  | .            | . | . | . | . | .                  | . |
| .                  | .            | . | . | . | . | .                  | . |
| Vv11g0700          | Tc09_g014560 | . | . | . | . | Gorai.004G107100.1 | . |
| Gorai.004G273600.1 | .            | . | . | . | . | .                  | . |
| .                  | .            | . | . | . | . | .                  | . |
| .                  | .            | . | . | . | . | .                  | . |
| Vv11g0701          | Tc09_g014550 | . | . | . | . | .                  | . |
| .                  | .            | . | . | . | . | .                  | . |
| .                  | .            | . | . | . | . | .                  | . |
| Vv11g0702          | .            | . | . | . | . | .                  | . |
| .                  | .            | . | . | . | . | .                  | . |
| .                  | .            | . | . | . | . | .                  | . |
| Vv11g0703          | Tc09_g014520 | . | . | . | . | Gorai.             | . |
| 009G009300.1       | .            | . | . | . | . | .                  | . |
| .                  | .            | . | . | . | . | .                  | . |
| .                  | .            | . | . | . | . | .                  | . |
| Vv11g0704          | .            | . | . | . | . | .                  | . |
| .                  | .            | . | . | . | . | .                  | . |
| .                  | .            | . | . | . | . | .                  | . |
| Vv11g0705          | Tc09_g005700 | . | . | . | . | .                  | . |
| .                  | .            | . | . | . | . | .                  | . |

|           |   |   |   |   |   |                    |   |
|-----------|---|---|---|---|---|--------------------|---|
| Vv11g0706 | . | . | . | . | . | .                  | . |
| .         | . | . | . | . | . | .                  | . |
| Vv11g0707 | . | . | . | . | . | .                  | . |
| .         | . | . | . | . | . | .                  | . |
| Vv11g0708 | . | . | . | . | . | .                  | . |
| .         | . | . | . | . | . | .                  | . |
| Vv11g0709 | . | . | . | . | . | .                  | . |
| .         | . | . | . | . | . | .                  | . |
| Vv11g0710 | . | . | . | . | . | .                  | . |
| .         | . | . | . | . | . | .                  | . |
| Vv11g0711 | . | . | . | . | . | .                  | . |
| .         | . | . | . | . | . | .                  | . |
| Vv11g0712 | . | . | . | . | . | .                  | . |
| .         | . | . | . | . | . | .                  | . |
| Vv11g0713 | . | . | . | . | . | .                  | . |
| .         | . | . | . | . | . | .                  | . |
| Vv11g0714 | . | . | . | . | . | .                  | . |
| .         | . | . | . | . | . | .                  | . |
| Vv11g0715 | . | . | . | . | . | .                  | . |
| .         | . | . | . | . | . | .                  | . |
| Vv11g0716 | . | . | . | . | . | .                  | . |
| .         | . | . | . | . | . | .                  | . |
| Vv11g0717 | . | . | . | . | . | .                  | . |
| .         | . | . | . | . | . | .                  | . |
| Vv11g0718 | . | . | . | . | . | .                  | . |
| .         | . | . | . | . | . | .                  | . |
| Vv11g0719 | . | . | . | . | . | Gorai.009G009100.1 | . |
| .         | . | . | . | . | . | .                  | . |
| Vv11g0720 | . | . | . | . | . | .                  | . |
| .         | . | . | . | . | . | .                  | . |
| Vv11g0721 | . | . | . | . | . | .                  | . |
| .         | . | . | . | . | . | .                  | . |
| Vv11g0722 | . | . | . | . | . | .                  | . |

|              |              |   |   |                    |   |        |   |
|--------------|--------------|---|---|--------------------|---|--------|---|
| .            | .            | . | . | .                  | . | .      | . |
| .            | .            | . | . | .                  | . | .      | . |
| Vv11g0723    | .            | . | . | .                  | . | .      | . |
| .            | .            | . | . | .                  | . | .      | . |
| Vv11g0724    | Tc09_g014470 | . | . | .                  | . | .      | . |
| .            | .            | . | . | .                  | . | .      | . |
| Vv11g0725    | .            | . | . | .                  | . | .      | . |
| .            | .            | . | . | .                  | . | .      | . |
| Vv11g0726    | Tc09_g026970 | . | . | .                  | . | .      | . |
| .            | .            | . | . | .                  | . | .      | . |
| Vv11g0727    | .            | . | . | .                  | . | .      | . |
| .            | .            | . | . | .                  | . | .      | . |
| Vv11g0728    | .            | . | . | .                  | . | .      | . |
| .            | .            | . | . | .                  | . | .      | . |
| Vv11g0729    | .            | . | . | .                  | . | .      | . |
| .            | .            | . | . | .                  | . | .      | . |
| Vv11g0730    | .            | . | . | .                  | . | .      | . |
| .            | .            | . | . | .                  | . | .      | . |
| Vv11g0731    | .            | . | . | .                  | . | .      | . |
| .            | .            | . | . | .                  | . | .      | . |
| Vv11g0732    | Tc09_g026960 | . | . | .                  | . | .      | . |
| .            | .            | . | . | .                  | . | .      | . |
| Vv11g0733    | .            | . | . | .                  | . | .      | . |
| .            | .            | . | . | .                  | . | .      | . |
| Vv11g0734    | Tc09_g014430 | . | . | Gorai.004G106800.1 | . | .      | . |
| .            | .            | . | . | .                  | . | .      | . |
| Vv11g0735    | Tc09_g014410 | . | . | .                  | . | Gorai. | . |
| 009G008900.1 | .            | . | . | .                  | . | .      | . |
| .            | .            | . | . | .                  | . | .      | . |
| Vv11g0736    | Tc09_g014400 | . | . | .                  | . | .      | . |
| .            | .            | . | . | .                  | . | .      | . |
| Vv11g0737    | Tc09_g014390 | . | . | .                  | . | .      | . |
| .            | .            | . | . | .                  | . | .      | . |
| Vv11g0738    | Tc09_g014380 | . | . | Gorai.004G106400.1 | . | .      | . |
| .            | .            | . | . | .                  | . | .      | . |
| .            | .            | . | . | .                  | . | .      | . |



|                    |                    |   |                    |        |   |
|--------------------|--------------------|---|--------------------|--------|---|
| Vv11g0756          | Tc09_g015170       | . | .                  | .      | . |
| .                  | .                  | . | .                  | .      | . |
| Vv11g0757          | .                  | . | .                  | .      | . |
| .                  | .                  | . | .                  | .      | . |
| Vv11g0758          | Tc09_g015180       | . | .                  | .      | . |
| .                  | .                  | . | .                  | .      | . |
| Vv11g0759          | Tc09_g015190       | . | Gorai.004G105500.1 | .      | . |
| .                  | .                  | . | .                  | .      | . |
| Vv11g0760          | .                  | . | .                  | .      | . |
| .                  | .                  | . | .                  | .      | . |
| Vv11g0761          | Tc09_g015200       | . | .                  | Gorai. | . |
| 009G008200.1       | .                  | . | .                  | .      | . |
| Vv11g0762          | Tc09_g015210       | . | .                  | .      | . |
| .                  | .                  | . | .                  | .      | . |
| Vv11g0763          | .                  | . | .                  | .      | . |
| .                  | .                  | . | .                  | .      | . |
| Vv11g0764          | .                  | . | .                  | .      | . |
| .                  | .                  | . | .                  | .      | . |
| Vv11g0765          | .                  | . | .                  | .      | . |
| .                  | .                  | . | .                  | .      | . |
| Vv11g0766          | Tc09_g015300       | . | Gorai.004G104700.1 | .      | . |
| .                  | .                  | . | .                  | .      | . |
| Vv11g0767          | .                  | . | .                  | .      | . |
| .                  | .                  | . | .                  | .      | . |
| Vv11g0768          | Tc09_g015310       | . | Gorai.004G104300.1 | .      | . |
| Gorai.004G273300.1 | Gorai.009G008000.1 | . | .                  | .      | . |
| .                  | .                  | . | .                  | .      | . |
| Vv11g0769          | .                  | . | .                  | .      | . |
| .                  | .                  | . | .                  | .      | . |
| Vv11g0770          | Tc09_g015390       | . | .                  | .      | . |
| .                  | .                  | . | .                  | .      | . |
| Vv11g0771          | .                  | . | .                  | .      | . |
| .                  | .                  | . | .                  | .      | . |
| .                  | .                  | . | .                  | .      | . |

|                    |              |   |   |                    |                    |        |   |
|--------------------|--------------|---|---|--------------------|--------------------|--------|---|
| Vv11g0772          | .            | . | . | .                  | .                  | .      | . |
| .                  | .            | . | . | .                  | .                  | .      | . |
| Vv11g0773          | .            | . | . | .                  | .                  | .      | . |
| .                  | .            | . | . | .                  | .                  | .      | . |
| Vv11g0774          | .            | . | . | .                  | .                  | .      | . |
| .                  | .            | . | . | .                  | .                  | .      | . |
| Vv11g0775          | .            | . | . | .                  | .                  | .      | . |
| .                  | .            | . | . | .                  | .                  | .      | . |
| Vv11g0776          | .            | . | . | .                  | .                  | .      | . |
| .                  | .            | . | . | .                  | .                  | .      | . |
| Vv11g0777          | .            | . | . | .                  | .                  | .      | . |
| .                  | .            | . | . | .                  | .                  | .      | . |
| Vv11g0778          | .            | . | . | Gorai.004G104100.1 | .                  | Gorai. | . |
| 004G273200.1       | .            | . | . | .                  | .                  | .      | . |
| .                  | .            | . | . | .                  | .                  | .      | . |
| Vv11g0779          | .            | . | . | .                  | .                  | .      | . |
| .                  | .            | . | . | .                  | .                  | .      | . |
| Vv11g0780          | .            | . | . | .                  | Gorai.009G005000.1 | .      | . |
| .                  | .            | . | . | .                  | .                  | .      | . |
| Vv11g0781          | .            | . | . | .                  | .                  | .      | . |
| .                  | .            | . | . | .                  | .                  | .      | . |
| Vv11g0782          | .            | . | . | .                  | .                  | .      | . |
| .                  | .            | . | . | .                  | .                  | .      | . |
| Vv11g0783          | Tc09_g015900 | . | . | Gorai.004G104000.1 | .                  | .      | . |
| Gorai.004G273100.1 | .            | . | . | .                  | .                  | .      | . |
| .                  | .            | . | . | .                  | .                  | .      | . |
| Vv11g0784          | .            | . | . | .                  | .                  | .      | . |
| .                  | .            | . | . | .                  | .                  | .      | . |
| Vv11g0785          | Tc09_g015970 | . | . | Gorai.004G103900.1 | .                  | .      | . |
| .                  | .            | . | . | .                  | .                  | .      | . |
| Vv11g0786          | Tc09_g015980 | . | . | .                  | .                  | .      | . |
| .                  | .            | . | . | .                  | .                  | .      | . |
| Vv11g0787          | .            | . | . | .                  | .                  | .      | . |
| .                  | .            | . | . | .                  | .                  | .      | . |
| .                  | .            | . | . | .                  | .                  | .      | . |

|           |              |   |                    |   |   |   |   |
|-----------|--------------|---|--------------------|---|---|---|---|
| Vv11g0788 | .            | . | .                  | . | . | . | . |
| .         | .            | . | .                  | . | . | . | . |
| Vv11g0789 | .            | . | .                  | . | . | . | . |
| .         | .            | . | .                  | . | . | . | . |
| Vv11g0790 | .            | . | .                  | . | . | . | . |
| .         | .            | . | .                  | . | . | . | . |
| Vv11g0791 | .            | . | Gorai.004G103800.1 | . | . | . | . |
| .         | .            | . | .                  | . | . | . | . |
| Vv11g0792 | .            | . | .                  | . | . | . | . |
| .         | .            | . | .                  | . | . | . | . |
| Vv11g0793 | Tc09_g007440 | . | .                  | . | . | . | . |
| .         | .            | . | .                  | . | . | . | . |
| Vv11g0794 | .            | . | .                  | . | . | . | . |
| .         | .            | . | .                  | . | . | . | . |
| Vv11g0795 | .            | . | .                  | . | . | . | . |
| .         | .            | . | .                  | . | . | . | . |
| Vv11g0796 | Tc09_g007330 | . | .                  | . | . | . | . |
| .         | .            | . | .                  | . | . | . | . |
| Vv11g0797 | .            | . | .                  | . | . | . | . |
| .         | .            | . | .                  | . | . | . | . |
| Vv11g0798 | .            | . | .                  | . | . | . | . |
| .         | .            | . | .                  | . | . | . | . |
| Vv11g0799 | .            | . | .                  | . | . | . | . |
| .         | .            | . | .                  | . | . | . | . |
| Vv11g0800 | Tc09_g007040 | . | .                  | . | . | . | . |
| .         | .            | . | .                  | . | . | . | . |
| Vv11g0801 | .            | . | .                  | . | . | . | . |
| .         | .            | . | .                  | . | . | . | . |
| Vv11g0802 | .            | . | .                  | . | . | . | . |
| .         | .            | . | .                  | . | . | . | . |
| Vv11g0803 | .            | . | .                  | . | . | . | . |
| .         | .            | . | .                  | . | . | . | . |
| Vv11g0804 | .            | . | .                  | . | . | . | . |
| .         | .            | . | .                  | . | . | . | . |





|           |              |   |   |   |                    |   |   |
|-----------|--------------|---|---|---|--------------------|---|---|
| Vv11g0821 | .            | . | . | . | .                  | . | . |
| .         | .            | . | . | . | .                  | . | . |
| Vv11g0822 | .            | . | . | . | .                  | . | . |
| .         | .            | . | . | . | .                  | . | . |
| Vv11g0823 | .            | . | . | . | .                  | . | . |
| .         | .            | . | . | . | .                  | . | . |
| Vv11g0824 | .            | . | . | . | .                  | . | . |
| .         | .            | . | . | . | .                  | . | . |
| Vv11g0825 | .            | . | . | . | .                  | . | . |
| .         | .            | . | . | . | .                  | . | . |
| Vv11g0826 | .            | . | . | . | .                  | . | . |
| .         | .            | . | . | . | .                  | . | . |
| Vv11g0827 | .            | . | . | . | .                  | . | . |
| .         | .            | . | . | . | .                  | . | . |
| Vv11g0828 | .            | . | . | . | .                  | . | . |
| .         | .            | . | . | . | .                  | . | . |
| Vv11g0829 | .            | . | . | . | .                  | . | . |
| .         | .            | . | . | . | .                  | . | . |
| Vv11g0830 | .            | . | . | . | .                  | . | . |
| .         | .            | . | . | . | .                  | . | . |
| Vv11g0831 | .            | . | . | . | .                  | . | . |
| .         | .            | . | . | . | .                  | . | . |
| Vv11g0832 | .            | . | . | . | .                  | . | . |
| .         | .            | . | . | . | .                  | . | . |
| Vv11g0833 | .            | . | . | . | .                  | . | . |
| .         | .            | . | . | . | .                  | . | . |
| Vv11g0834 | .            | . | . | . | .                  | . | . |
| .         | .            | . | . | . | .                  | . | . |
| Vv11g0835 | .            | . | . | . | .                  | . | . |
| .         | .            | . | . | . | .                  | . | . |
| Vv11g0836 | Tc09_g020730 | . | . | . | Gorai.004G020600.1 | . | . |
| .         | .            | . | . | . | .                  | . | . |
| Vv11g0837 | .            | . | . | . | .                  | . | . |
| .         | .            | . | . | . | .                  | . | . |

|                    |              |              |   |                    |                    |   |   |
|--------------------|--------------|--------------|---|--------------------|--------------------|---|---|
| Vv11g0838          | .            | .            | . | .                  | .                  | . | . |
| .                  | .            | .            | . | .                  | .                  | . | . |
| Vv11g0839          | .            | .            | . | .                  | .                  | . | . |
| .                  | .            | .            | . | .                  | .                  | . | . |
| Vv11g0840          | .            | .            | . | .                  | .                  | . | . |
| .                  | .            | .            | . | .                  | .                  | . | . |
| Vv11g0841          | .            | .            | . | .                  | .                  | . | . |
| .                  | .            | .            | . | .                  | .                  | . | . |
| Vv11g0842          | Tc09_g020790 | .            | . | .                  | .                  | . | . |
| .                  | .            | .            | . | .                  | .                  | . | . |
| Vv11g0843          | .            | .            | . | .                  | .                  | . | . |
| .                  | .            | .            | . | .                  | .                  | . | . |
| Vv11g0844          | .            | .            | . | .                  | .                  | . | . |
| .                  | .            | .            | . | .                  | .                  | . | . |
| Vv11g0845          | .            | .            | . | .                  | .                  | . | . |
| .                  | .            | .            | . | .                  | .                  | . | . |
| Vv11g0846          | .            | .            | . | .                  | Gorai.004G272800.1 | . | . |
| .                  | Vv17g0798    | .            | . | Gorai.001G077600.1 | .                  | . | . |
| .                  | .            | .            | . | .                  | .                  | . | . |
| Vv11g0847          | .            | .            | . | .                  | .                  | . | . |
| .                  | .            | .            | . | .                  | .                  | . | . |
| Vv11g0848          | .            | .            | . | .                  | .                  | . | . |
| .                  | .            | .            | . | .                  | .                  | . | . |
| Vv11g0849          | Tc09_g000280 | .            | . | .                  | .                  | . | . |
| .                  | .            | .            | . | .                  | .                  | . | . |
| Vv11g0850          | Tc09_g021860 | .            | . | .                  | .                  | . | . |
| .                  | .            | .            | . | .                  | .                  | . | . |
| Vv11g0851          | Tc09_g000260 | .            | . | .                  | .                  | . | . |
| .                  | .            | .            | . | .                  | .                  | . | . |
| Vv11g0852          | .            | .            | . | .                  | .                  | . | . |
| .                  | .            | .            | . | .                  | .                  | . | . |
| Vv11g0853          | Tc09_g021760 | .            | . | .                  | .                  | . | . |
| .                  | Vv17g0804    | Tc03_g011980 | . | .                  | .                  | . | . |
| Gorai.008G198400.1 | .            | .            | . | .                  | .                  | . | . |

|           |              |              |   |                    |   |   |   |
|-----------|--------------|--------------|---|--------------------|---|---|---|
| Vv11g0854 | .            | .            | . | .                  | . | . | . |
| .         | .            | .            | . | .                  | . | . | . |
| Vv11g0855 | .            | .            | . | .                  | . | . | . |
| .         | .            | .            | . | .                  | . | . | . |
| Vv11g0856 | .            | .            | . | Gorai.004G270800.1 | . | . | . |
| .         | .            | .            | . | .                  | . | . | . |
| Vv11g0857 | .            | .            | . | .                  | . | . | . |
| .         | .            | .            | . | .                  | . | . | . |
| Vv11g0858 | .            | .            | . | .                  | . | . | . |
| .         | .            | .            | . | .                  | . | . | . |
| Vv11g0859 | Tc09_g003550 | .            | . | .                  | . | . | . |
| .         | .            | .            | . | .                  | . | . | . |
| Vv11g0860 | Tc09_g000030 | .            | . | .                  | . | . | . |
| .         | .            | .            | . | .                  | . | . | . |
| Vv11g0861 | .            | .            | . | .                  | . | . | . |
| .         | .            | .            | . | .                  | . | . | . |
| Vv11g0862 | .            | .            | . | .                  | . | . | . |
| .         | .            | .            | . | .                  | . | . | . |
| Vv11g0863 | .            | .            | . | .                  | . | . | . |
| .         | .            | .            | . | .                  | . | . | . |
| Vv11g0864 | .            | .            | . | .                  | . | . | . |
| .         | .            | .            | . | .                  | . | . | . |
| Vv11g0865 | .            | .            | . | Gorai.004G022300.1 | . | . | . |
| .         | Vv17g0832    | Tc03_g000240 | . | .                  | . | . | . |
| .         | .            | .            | . | .                  | . | . | . |
| Vv11g0866 | Tc09_g003530 | .            | . | .                  | . | . | . |
| .         | .            | .            | . | .                  | . | . | . |
| Vv11g0867 | .            | .            | . | .                  | . | . | . |
| .         | .            | .            | . | .                  | . | . | . |
| Vv11g0868 | .            | .            | . | .                  | . | . | . |
| .         | .            | .            | . | .                  | . | . | . |
| Vv11g0869 | .            | .            | . | .                  | . | . | . |
| .         | .            | .            | . | .                  | . | . | . |
| .         | .            | .            | . | .                  | . | . | . |

|              |   |                    |   |   |        |   |   |
|--------------|---|--------------------|---|---|--------|---|---|
| Vv11g0870    | . | .                  | . | . | .      | . | . |
| .            | . | .                  | . | . | .      | . | . |
| Vv11g0871    | . | .                  | . | . | .      | . | . |
| .            | . | .                  | . | . | .      | . | . |
| Vv11g0872    | . | .                  | . | . | .      | . | . |
| .            | . | .                  | . | . | .      | . | . |
| Vv11g0873    | . | .                  | . | . | .      | . | . |
| .            | . | .                  | . | . | .      | . | . |
| Vv11g0874    | . | .                  | . | . | .      | . | . |
| .            | . | .                  | . | . | .      | . | . |
| Vv11g0875    | . | .                  | . | . | .      | . | . |
| .            | . | .                  | . | . | .      | . | . |
| Vv11g0876    | . | .                  | . | . | .      | . | . |
| .            | . | .                  | . | . | .      | . | . |
| Vv11g0877    | . | .                  | . | . | .      | . | . |
| .            | . | .                  | . | . | .      | . | . |
| Vv11g0878    | . | .                  | . | . | .      | . | . |
| .            | . | .                  | . | . | .      | . | . |
| Vv11g0879    | . | .                  | . | . | .      | . | . |
| .            | . | .                  | . | . | .      | . | . |
| Vv11g0880    | . | .                  | . | . | .      | . | . |
| .            | . | .                  | . | . | .      | . | . |
| Vv11g0881    | . | .                  | . | . | .      | . | . |
| .            | . | .                  | . | . | .      | . | . |
| Vv11g0882    | . | .                  | . | . | .      | . | . |
| .            | . | .                  | . | . | .      | . | . |
| Vv11g0883    | . | .                  | . | . | .      | . | . |
| .            | . | .                  | . | . | .      | . | . |
| Vv11g0884    | . | .                  | . | . | .      | . | . |
| .            | . | .                  | . | . | .      | . | . |
| Vv11g0885    | . | .                  | . | . | .      | . | . |
| .            | . | .                  | . | . | .      | . | . |
| Vv11g0886    | . | .                  | . | . | .      | . | . |
| 004G022500.1 | . | Gorai.013G241900.1 | . | . | Gorai. | . | . |
| .            | . | .                  | . | . | .      | . | . |

|           |              |   |   |   |                    |   |   |
|-----------|--------------|---|---|---|--------------------|---|---|
| .         | .            | . | . | . | .                  | . | . |
| .         | .            | . | . | . | .                  | . | . |
| Vv11g0887 | .            | . | . | . | .                  | . | . |
| .         | .            | . | . | . | .                  | . | . |
| .         | .            | . | . | . | .                  | . | . |
| Vv11g0888 | .            | . | . | . | .                  | . | . |
| Vv17g0849 | .            | . | . | . | .                  | . | . |
| .         | .            | . | . | . | .                  | . | . |
| Vv11g0889 | .            | . | . | . | .                  | . | . |
| .         | .            | . | . | . | .                  | . | . |
| .         | .            | . | . | . | .                  | . | . |
| Vv11g0890 | .            | . | . | . | .                  | . | . |
| .         | .            | . | . | . | .                  | . | . |
| .         | .            | . | . | . | .                  | . | . |
| Vv11g0891 | .            | . | . | . | .                  | . | . |
| .         | .            | . | . | . | .                  | . | . |
| .         | .            | . | . | . | .                  | . | . |
| Vv11g0892 | .            | . | . | . | .                  | . | . |
| .         | .            | . | . | . | .                  | . | . |
| .         | .            | . | . | . | .                  | . | . |
| Vv11g0893 | .            | . | . | . | .                  | . | . |
| .         | .            | . | . | . | .                  | . | . |
| .         | .            | . | . | . | .                  | . | . |
| Vv11g0894 | .            | . | . | . | .                  | . | . |
| .         | .            | . | . | . | .                  | . | . |
| .         | .            | . | . | . | .                  | . | . |
| Vv11g0895 | .            | . | . | . | .                  | . | . |
| .         | .            | . | . | . | .                  | . | . |
| .         | .            | . | . | . | .                  | . | . |
| Vv11g0896 | .            | . | . | . | .                  | . | . |
| .         | .            | . | . | . | .                  | . | . |
| .         | .            | . | . | . | .                  | . | . |
| Vv11g0897 | .            | . | . | . | .                  | . | . |
| .         | .            | . | . | . | .                  | . | . |
| .         | .            | . | . | . | .                  | . | . |
| Vv11g0898 | Tc09_g003340 | . | . | . | .                  | . | . |
| .         | .            | . | . | . | .                  | . | . |
| .         | .            | . | . | . | .                  | . | . |
| Vv11g0899 | .            | . | . | . | .                  | . | . |
| .         | .            | . | . | . | .                  | . | . |
| .         | .            | . | . | . | .                  | . | . |
| Vv11g0900 | .            | . | . | . | .                  | . | . |
| .         | .            | . | . | . | .                  | . | . |
| .         | .            | . | . | . | .                  | . | . |
| Vv11g0901 | Tc09_g003230 | . | . | . | Gorai.004G024800.1 | . | . |
| .         | .            | . | . | . | .                  | . | . |
| .         | .            | . | . | . | .                  | . | . |
| Vv11g0902 | .            | . | . | . | .                  | . | . |
| .         | .            | . | . | . | .                  | . | . |
| .         | .            | . | . | . | .                  | . | . |

|           |              |                    |   |   |   |   |   |
|-----------|--------------|--------------------|---|---|---|---|---|
| Vv11g0903 | .            | .                  | . | . | . | . | . |
| .         | .            | .                  | . | . | . | . | . |
| Vv11g0904 | .            | .                  | . | . | . | . | . |
| .         | .            | .                  | . | . | . | . | . |
| Vv11g0905 | .            | .                  | . | . | . | . | . |
| .         | .            | .                  | . | . | . | . | . |
| Vv11g0906 | .            | .                  | . | . | . | . | . |
| .         | .            | .                  | . | . | . | . | . |
| Vv11g0907 | .            | .                  | . | . | . | . | . |
| .         | .            | .                  | . | . | . | . | . |
| Vv11g0908 | .            | .                  | . | . | . | . | . |
| .         | .            | .                  | . | . | . | . | . |
| Vv11g0909 | .            | .                  | . | . | . | . | . |
| .         | .            | .                  | . | . | . | . | . |
| Vv11g0910 | .            | .                  | . | . | . | . | . |
| .         | .            | .                  | . | . | . | . | . |
| Vv11g0911 | .            | .                  | . | . | . | . | . |
| .         | .            | .                  | . | . | . | . | . |
| Vv11g0912 | .            | .                  | . | . | . | . | . |
| .         | .            | .                  | . | . | . | . | . |
| Vv11g0913 | .            | .                  | . | . | . | . | . |
| .         | .            | .                  | . | . | . | . | . |
| Vv11g0914 | .            | .                  | . | . | . | . | . |
| .         | .            | .                  | . | . | . | . | . |
| Vv11g0915 | Tc09_g025210 | .                  | . | . | . | . | . |
| .         | .            | .                  | . | . | . | . | . |
| Vv11g0916 | .            | .                  | . | . | . | . | . |
| .         | .            | .                  | . | . | . | . | . |
| Vv11g0917 | .            | .                  | . | . | . | . | . |
| .         | .            | .                  | . | . | . | . | . |
| Vv11g0918 | Tc09_g018340 | Gorai.013G242600.1 | . | . | . | . | . |
| .         | .            | .                  | . | . | . | . | . |
| Vv11g0919 | Tc09_g018280 | Gorai.013G242700.1 | . | . | . | . | . |
| .         | .            | .                  | . | . | . | . | . |

|                    |                    |                    |   |                    |   |   |   |
|--------------------|--------------------|--------------------|---|--------------------|---|---|---|
| Vv11g0920          | .                  | .                  | . | .                  | . | . | . |
| .                  | .                  | .                  | . | .                  | . | . | . |
| Vv11g0921          | Tc09_g018210       | .                  | . | .                  | . | . | . |
| Vv17g0861          | Tc03_g000540       | .                  | . | .                  | . | . | . |
| Gorai.006G187900.1 | .                  | .                  | . | .                  | . | . | . |
| .                  | .                  | .                  | . | .                  | . | . | . |
| Vv11g0922          | .                  | .                  | . | .                  | . | . | . |
| .                  | .                  | .                  | . | .                  | . | . | . |
| Vv11g0923          | .                  | .                  | . | .                  | . | . | . |
| .                  | .                  | .                  | . | .                  | . | . | . |
| Vv11g0924          | .                  | .                  | . | .                  | . | . | . |
| .                  | .                  | .                  | . | .                  | . | . | . |
| Vv11g0925          | Tc09_g018190       | .                  | . | .                  | . | . | . |
| .                  | .                  | .                  | . | .                  | . | . | . |
| Vv11g0926          | .                  | .                  | . | .                  | . | . | . |
| .                  | .                  | .                  | . | .                  | . | . | . |
| Vv11g0927          | Tc09_g002900       | Gorai.013G242800.1 | . | .                  | . | . | . |
| Gorai.009G002200.1 | .                  | .                  | . | .                  | . | . | . |
| .                  | .                  | .                  | . | .                  | . | . | . |
| Vv11g0928          | .                  | .                  | . | .                  | . | . | . |
| .                  | .                  | .                  | . | .                  | . | . | . |
| Vv11g0929          | Gorai.013G243000.1 | .                  | . | .                  | . | . | . |
| .                  | .                  | .                  | . | .                  | . | . | . |
| Vv11g0930          | Gorai.013G243100.1 | .                  | . | .                  | . | . | . |
| .                  | .                  | .                  | . | .                  | . | . | . |
| Vv11g0931          | .                  | .                  | . | .                  | . | . | . |
| .                  | .                  | .                  | . | .                  | . | . | . |
| Vv11g0932          | .                  | .                  | . | .                  | . | . | . |
| .                  | .                  | .                  | . | .                  | . | . | . |
| Vv11g0933          | .                  | .                  | . | Gorai.004G025000.1 | . | . | . |
| Gorai.009G002300.1 | .                  | .                  | . | .                  | . | . | . |
| .                  | .                  | .                  | . | .                  | . | . | . |
| Vv11g0934          | .                  | .                  | . | .                  | . | . | . |
| .                  | .                  | .                  | . | .                  | . | . | . |
| Vv11g0935          | .                  | .                  | . | .                  | . | . | . |



|           |              |   |   |   |   |   |   |
|-----------|--------------|---|---|---|---|---|---|
| .         | .            | . | . | . | . | . | . |
| Vv11g0936 | .            | . | . | . | . | . | . |
| .         | .            | . | . | . | . | . | . |
| Vv11g0937 | .            | . | . | . | . | . | . |
| .         | .            | . | . | . | . | . | . |
| Vv11g0938 | Tc09_g004330 | . | . | . | . | . | . |
| .         | .            | . | . | . | . | . | . |
| Vv11g0939 | Tc09_g002700 | . | . | . | . | . | . |
| .         | .            | . | . | . | . | . | . |
| Vv11g0940 | .            | . | . | . | . | . | . |
| .         | .            | . | . | . | . | . | . |
| Vv11g0941 | .            | . | . | . | . | . | . |
| .         | .            | . | . | . | . | . | . |
| Vv11g0942 | .            | . | . | . | . | . | . |
| .         | .            | . | . | . | . | . | . |
| Vv11g0943 | .            | . | . | . | . | . | . |
| .         | .            | . | . | . | . | . | . |
| Vv11g0944 | .            | . | . | . | . | . | . |
| .         | .            | . | . | . | . | . | . |
| Vv11g0945 | .            | . | . | . | . | . | . |
| .         | .            | . | . | . | . | . | . |
| Vv11g0946 | .            | . | . | . | . | . | . |
| .         | .            | . | . | . | . | . | . |
| Vv11g0947 | .            | . | . | . | . | . | . |
| .         | .            | . | . | . | . | . | . |
| Vv11g0948 | .            | . | . | . | . | . | . |
| .         | .            | . | . | . | . | . | . |
| Vv11g0949 | Tc09_g002430 | . | . | . | . | . | . |
| .         | .            | . | . | . | . | . | . |
| Vv11g0950 | .            | . | . | . | . | . | . |
| .         | .            | . | . | . | . | . | . |
| Vv11g0951 | .            | . | . | . | . | . | . |
| .         | .            | . | . | . | . | . | . |
| .         | .            | . | . | . | . | . | . |

|           |              |   |   |   |   |   |   |
|-----------|--------------|---|---|---|---|---|---|
| Vv11g0952 | .            | . | . | . | . | . | . |
| .         | .            | . | . | . | . | . | . |
| Vv11g0953 | Tc09_g024850 | . | . | . | . | . | . |
| .         | .            | . | . | . | . | . | . |
| Vv11g0954 | .            | . | . | . | . | . | . |
| .         | .            | . | . | . | . | . | . |
| Vv11g0955 | .            | . | . | . | . | . | . |
| .         | .            | . | . | . | . | . | . |
| Vv11g0956 | .            | . | . | . | . | . | . |
| .         | .            | . | . | . | . | . | . |
| Vv11g0957 | .            | . | . | . | . | . | . |
| .         | .            | . | . | . | . | . | . |
| Vv11g0958 | .            | . | . | . | . | . | . |
| .         | .            | . | . | . | . | . | . |
| Vv11g0959 | Tc09_g003930 | . | . | . | . | . | . |
| .         | .            | . | . | . | . | . | . |
| Vv11g0960 | Tc09_g018120 | . | . | . | . | . | . |
| .         | .            | . | . | . | . | . | . |
| Vv11g0961 | .            | . | . | . | . | . | . |
| Vv17g0877 | Tc03_g000690 | . | . | . | . | . | . |
| .         | .            | . | . | . | . | . | . |
| Vv11g0962 | .            | . | . | . | . | . | . |
| .         | .            | . | . | . | . | . | . |
| Vv11g0963 | .            | . | . | . | . | . | . |
| .         | .            | . | . | . | . | . | . |
| Vv11g0964 | .            | . | . | . | . | . | . |
| .         | .            | . | . | . | . | . | . |
| Vv11g0965 | .            | . | . | . | . | . | . |
| .         | .            | . | . | . | . | . | . |
| Vv11g0966 | Tc09_g017950 | . | . | . | . | . | . |
| .         | .            | . | . | . | . | . | . |
| Vv11g0967 | Tc09_g017840 | . | . | . | . | . | . |
| .         | .            | . | . | . | . | . | . |
| Vv11g0968 | .            | . | . | . | . | . | . |
| .         | .            | . | . | . | . | . | . |

|                    |              |   |   |                    |        |   |
|--------------------|--------------|---|---|--------------------|--------|---|
| Vv11g0969          | Tc09_g017780 | . | . | .                  | .      | . |
| .                  | .            | . | . | .                  | .      | . |
| Vv11g0970          | .            | . | . | .                  | .      | . |
| .                  | .            | . | . | .                  | .      | . |
| Vv11g0971          | Tc09_g017760 | . | . | .                  | .      | . |
| Vv17g0882          | Tc03_g000730 | . | . | .                  | .      | . |
| .                  | .            | . | . | .                  | .      | . |
| Vv11g0972          | Tc09_g017700 | . | . | .                  | .      | . |
| .                  | .            | . | . | .                  | .      | . |
| Vv11g0973          | Tc09_g017500 | . | . | .                  | .      | . |
| .                  | .            | . | . | .                  | .      | . |
| Vv11g0974          | Tc09_g017490 | . | . | .                  | Gorai. | . |
| 009G003700.1       | .            | . | . | .                  | .      | . |
| .                  | .            | . | . | .                  | .      | . |
| Vv11g0975          | .            | . | . | Gorai.004G026700.1 | .      | . |
| .                  | .            | . | . | .                  | .      | . |
| Vv11g0976          | .            | . | . | Gorai.004G027200.1 | .      | . |
| Gorai.009G004000.1 | .            | . | . | .                  | .      | . |
| .                  | .            | . | . | .                  | .      | . |
| Vv11g0977          | .            | . | . | .                  | .      | . |
| .                  | .            | . | . | .                  | .      | . |
| Vv11g0978          | .            | . | . | .                  | .      | . |
| .                  | .            | . | . | .                  | .      | . |
| Vv11g0979          | .            | . | . | .                  | .      | . |
| .                  | .            | . | . | .                  | .      | . |
| Vv11g0980          | .            | . | . | .                  | .      | . |
| .                  | .            | . | . | .                  | .      | . |
| Vv11g0981          | .            | . | . | Gorai.004G027400.1 | .      | . |
| Gorai.009G004400.1 | .            | . | . | .                  | .      | . |
| .                  | .            | . | . | .                  | .      | . |
| Vv11g0982          | .            | . | . | .                  | .      | . |
| .                  | .            | . | . | .                  | .      | . |
| Vv11g0983          | .            | . | . | .                  | .      | . |
| .                  | .            | . | . | .                  | .      | . |
| Vv11g0984          | .            | . | . | .                  | .      | . |
| .                  | .            | . | . | .                  | .      | . |

|                    |              |   |   |                    |                    |   |   |
|--------------------|--------------|---|---|--------------------|--------------------|---|---|
| Vv11g0985          | .            | . | . | .                  | .                  | . | . |
| .                  | .            | . | . | .                  | .                  | . | . |
| Vv11g0986          | .            | . | . | .                  | .                  | . | . |
| .                  | .            | . | . | .                  | .                  | . | . |
| Vv11g0987          | .            | . | . | .                  | .                  | . | . |
| .                  | .            | . | . | .                  | .                  | . | . |
| Vv11g0988          | .            | . | . | .                  | .                  | . | . |
| .                  | .            | . | . | .                  | .                  | . | . |
| Vv11g0989          | .            | . | . | .                  | .                  | . | . |
| .                  | .            | . | . | .                  | .                  | . | . |
| Vv11g0990          | .            | . | . | .                  | Gorai.004G027600.1 | . | . |
| Gorai.009G004900.1 | .            | . | . | .                  | .                  | . | . |
| .                  | .            | . | . | .                  | .                  | . | . |
| Vv11g0991          | Tc09_g017450 | . | . | Gorai.004G099100.1 | .                  | . | . |
| .                  | .            | . | . | .                  | .                  | . | . |
| Vv11g0992          | Tc09_g017430 | . | . | .                  | Gorai.             | . | . |
| 009G005000.1       | .            | . | . | .                  | .                  | . | . |
| .                  | .            | . | . | .                  | .                  | . | . |
| Vv11g0993          | .            | . | . | .                  | Gorai.009G005400.1 | . | . |
| .                  | .            | . | . | .                  | .                  | . | . |
| Vv11g0994          | .            | . | . | .                  | .                  | . | . |
| .                  | .            | . | . | .                  | .                  | . | . |
| Vv11g0995          | Tc09_g017350 | . | . | .                  | Gorai.             | . | . |
| 009G005600.1       | .            | . | . | .                  | .                  | . | . |
| .                  | .            | . | . | .                  | .                  | . | . |
| Vv11g0996          | .            | . | . | .                  | .                  | . | . |
| .                  | .            | . | . | .                  | .                  | . | . |
| Vv11g0997          | .            | . | . | .                  | .                  | . | . |
| .                  | .            | . | . | .                  | .                  | . | . |
| Vv11g0998          | .            | . | . | Gorai.004G099500.1 | .                  | . | . |
| .                  | .            | . | . | .                  | .                  | . | . |
| Vv11g0999          | .            | . | . | .                  | .                  | . | . |
| .                  | .            | . | . | .                  | .                  | . | . |
| Vv11g1000          | .            | . | . | Gorai.004G099900.1 | .                  | . | . |
| .                  | .            | . | . | .                  | .                  | . | . |
| .                  | .            | . | . | .                  | .                  | . | . |

|           |              |   |                    |   |
|-----------|--------------|---|--------------------|---|
| Vv11g1001 | Tc09_g017120 | . | Gorai.004G100200.1 | . |
| .         | .            | . | .                  | . |
| Vv11g1002 | .            | . | .                  | . |
| .         | .            | . | .                  | . |
| Vv11g1003 | Tc09_g017090 | . | .                  | . |
| .         | .            | . | .                  | . |
| Vv11g1004 | .            | . | .                  | . |
| .         | .            | . | .                  | . |
| Vv11g1005 | .            | . | Gorai.004G100300.1 | . |
| .         | .            | . | .                  | . |
| Vv11g1006 | .            | . | .                  | . |
| .         | .            | . | .                  | . |
| Vv11g1007 | .            | . | .                  | . |
| .         | .            | . | .                  | . |
| Vv11g1008 | .            | . | .                  | . |
| .         | .            | . | .                  | . |
| Vv11g1009 | .            | . | .                  | . |
| .         | .            | . | .                  | . |
| Vv11g1010 | .            | . | .                  | . |
| .         | .            | . | .                  | . |
| Vv11g1011 | .            | . | Gorai.004G100400.1 | . |
| .         | .            | . | .                  | . |
| Vv11g1012 | .            | . | .                  | . |
| .         | .            | . | .                  | . |
| Vv11g1013 | .            | . | .                  | . |
| .         | .            | . | .                  | . |
| Vv11g1014 | .            | . | .                  | . |
| .         | .            | . | .                  | . |
| Vv11g1015 | .            | . | .                  | . |
| .         | .            | . | .                  | . |
| Vv11g1016 | .            | . | Gorai.004G100500.1 | . |
| .         | .            | . | .                  | . |
| Vv11g1017 | .            | . | .                  | . |
| .         | .            | . | .                  | . |

|              |              |   |                    |   |                    |   |
|--------------|--------------|---|--------------------|---|--------------------|---|
| Vv11g1018    | .            | . | .                  | . | Gorai.009G005900.1 | . |
| .            | .            | . | .                  | . | .                  | . |
| Vv11g1019    | .            | . | .                  | . | .                  | . |
| .            | .            | . | .                  | . | .                  | . |
| Vv11g1020    | .            | . | .                  | . | .                  | . |
| .            | .            | . | .                  | . | .                  | . |
| Vv11g1021    | .            | . | Gorai.004G100800.1 | . | .                  | . |
| .            | .            | . | .                  | . | .                  | . |
| Vv11g1022    | .            | . | .                  | . | .                  | . |
| .            | .            | . | .                  | . | .                  | . |
| Vv11g1023    | .            | . | .                  | . | Gorai.009G006000.1 | . |
| .            | .            | . | .                  | . | .                  | . |
| Vv11g1024    | .            | . | .                  | . | .                  | . |
| .            | .            | . | .                  | . | .                  | . |
| Vv11g1025    | .            | . | .                  | . | Gorai.009G006100.1 | . |
| .            | .            | . | .                  | . | .                  | . |
| Vv11g1026    | .            | . | .                  | . | Gorai.009G006200.1 | . |
| .            | .            | . | .                  | . | .                  | . |
| Vv11g1027    | Tc09_g016990 | . | Gorai.004G100900.1 | . | .                  | . |
| .            | .            | . | .                  | . | .                  | . |
| Vv11g1028    | Tc09_g016970 | . | .                  | . | Gorai.             | . |
| 009G006300.1 | .            | . | .                  | . | .                  | . |
| Vv11g1029    | Tc09_g016960 | . | .                  | . | .                  | . |
| .            | .            | . | .                  | . | .                  | . |
| Vv11g1030    | .            | . | .                  | . | .                  | . |
| .            | .            | . | .                  | . | .                  | . |
| Vv11g1031    | Tc09_g016950 | . | .                  | . | .                  | . |
| .            | .            | . | .                  | . | .                  | . |
| Vv11g1032    | Tc09_g016940 | . | .                  | . | Gorai.             | . |
| 009G006400.1 | .            | . | .                  | . | .                  | . |
| Vv11g1033    | Tc09_g016930 | . | .                  | . | .                  | . |
| .            | .            | . | .                  | . | .                  | . |
| Vv11g1034    | .            | . | .                  | . | .                  | . |

|           |              |  |  |                    |  |  |  |
|-----------|--------------|--|--|--------------------|--|--|--|
| Vv11g1035 |              |  |  |                    |  |  |  |
| Vv11g1036 |              |  |  |                    |  |  |  |
| Vv11g1037 |              |  |  |                    |  |  |  |
| Vv11g1038 |              |  |  | Gorai.004G030400.1 |  |  |  |
| Vv11g1039 |              |  |  |                    |  |  |  |
| Vv11g1040 |              |  |  |                    |  |  |  |
| Vv11g1041 |              |  |  | Gorai.004G030500.1 |  |  |  |
| Vv11g1042 |              |  |  |                    |  |  |  |
| Vv11g1043 |              |  |  | Gorai.004G030600.1 |  |  |  |
| Vv11g1044 |              |  |  |                    |  |  |  |
| Vv11g1045 |              |  |  |                    |  |  |  |
| Vv11g1046 |              |  |  | Gorai.004G030700.1 |  |  |  |
| Vv11g1047 |              |  |  |                    |  |  |  |
| Vv11g1048 | Tc09_g016910 |  |  |                    |  |  |  |
| Vv11g1049 |              |  |  |                    |  |  |  |
| Vv11g1050 |              |  |  |                    |  |  |  |

|                    |              |   |                    |   |   |        |   |
|--------------------|--------------|---|--------------------|---|---|--------|---|
| Vv11g1051          | .            | . | .                  | . | . | .      | . |
| .                  | .            | . | .                  | . | . | .      | . |
| Vv11g1052          | .            | . | .                  | . | . | .      | . |
| .                  | .            | . | .                  | . | . | .      | . |
| Vv11g1053          | .            | . | .                  | . | . | .      | . |
| .                  | .            | . | .                  | . | . | .      | . |
| Vv11g1054          | .            | . | .                  | . | . | .      | . |
| .                  | .            | . | .                  | . | . | .      | . |
| Vv11g1055          | Tc09_g016880 |   | Gorai.013G246400.1 |   | . | .      | . |
| .                  | .            | . | .                  | . | . | .      | . |
| Vv11g1056          | Tc09_g016870 |   | Gorai.013G246300.1 |   | . | .      | . |
| .                  | .            | . | .                  | . | . | .      | . |
| Vv11g1057          | Tc09_g016790 |   | .                  | . | . | Gorai. | . |
| 009G006500.1       | .            | . | .                  | . | . | .      | . |
| Vv11g1058          | .            | . | .                  | . | . | .      | . |
| .                  | .            | . | .                  | . | . | .      | . |
| Vv11g1059          | .            | . | .                  | . | . | .      | . |
| .                  | .            | . | .                  | . | . | .      | . |
| Vv11g1060          | .            | . | .                  | . | . | .      | . |
| .                  | .            | . | .                  | . | . | .      | . |
| Vv11g1061          | .            | . | .                  | . | . | .      | . |
| .                  | .            | . | .                  | . | . | .      | . |
| Vv11g1062          | .            | . | .                  | . | . | .      | . |
| .                  | .            | . | .                  | . | . | .      | . |
| Vv11g1063          | .            | . | .                  | . | . | .      | . |
| .                  | .            | . | .                  | . | . | .      | . |
| Vv11g1064          | .            | . | .                  | . | . | .      | . |
| .                  | .            | . | .                  | . | . | .      | . |
| Vv11g1065          | Tc09_g016780 |   | Gorai.004G101000.1 |   | . | .      | . |
| Gorai.009G006600.1 | .            | . | .                  | . | . | .      | . |
| .                  | .            | . | .                  | . | . | .      | . |
| Vv11g1066          | .            | . | .                  | . | . | .      | . |
| .                  | .            | . | .                  | . | . | .      | . |
| Vv11g1067          | .            | . | .                  | . | . | .      | . |



|           |                    |                    |   |   |   |   |   |
|-----------|--------------------|--------------------|---|---|---|---|---|
| .         | .                  | .                  | . | . | . | . | . |
| .         | .                  | .                  | . | . | . | . | . |
| Vv11g1068 | Tc09_g016760       | Gorai.013G246200.1 | . | . | . | . | . |
|           | Gorai.009G006700.1 | .                  | . | . | . | . | . |
| .         | .                  | .                  | . | . | . | . | . |
| Vv11g1069 | .                  | .                  | . | . | . | . | . |
| Vv08g0076 | .                  | .                  | . | . | . | . | . |
| .         | .                  | .                  | . | . | . | . | . |
| Vv11g1070 | .                  | .                  | . | . | . | . | . |
| .         | .                  | .                  | . | . | . | . | . |
| Vv11g1071 | Tc09_g016710       | .                  | . | . | . | . | . |
|           | Vv08g0084          | Tc05_g023190       | . | . | . | . | . |
| .         | .                  | .                  | . | . | . | . | . |
| Vv11g1072 | .                  | .                  | . | . | . | . | . |
| Vv08g0086 | Tc05_g023200       | .                  | . | . | . | . | . |
| .         | .                  | .                  | . | . | . | . | . |
| Vv11g1073 | Tc09_g016680       | .                  | . | . | . | . | . |
|           | Vv08g0088          | Tc05_g023210       | . | . | . | . | . |
| .         | .                  | .                  | . | . | . | . | . |
| Vv11g1074 | Tc09_g016670       | .                  | . | . | . | . | . |
|           | Vv08g0095          | .                  | . | . | . | . | . |
| .         | .                  | .                  | . | . | . | . | . |
| Vv11g1075 | .                  | .                  | . | . | . | . | . |
| Vv08g0098 | .                  | .                  | . | . | . | . | . |
| .         | .                  | .                  | . | . | . | . | . |
| Vv11g1076 | Tc09_g016660       | Gorai.013G246100.1 | . | . | . | . | . |
|           | Vv08g0103          | .                  | . | . | . | . | . |
| .         | .                  | .                  | . | . | . | . | . |
| .         | .                  | .                  | . | . | . | . | . |
| Vv11g1077 | .                  | .                  | . | . | . | . | . |
| Vv08g0104 | .                  | .                  | . | . | . | . | . |
| .         | .                  | .                  | . | . | . | . | . |
| Vv11g1078 | Tc09_g016650       | Gorai.004G101100.1 | . | . | . | . | . |
| .         | .                  | .                  | . | . | . | . | . |
| Vv11g1079 | .                  | .                  | . | . | . | . | . |
| .         | .                  | .                  | . | . | . | . | . |
| .         | .                  | .                  | . | . | . | . | . |
| Vv11g1080 | .                  | .                  | . | . | . | . | . |
| .         | .                  | .                  | . | . | . | . | . |
| .         | .                  | .                  | . | . | . | . | . |
| Vv11g1081 | .                  | .                  | . | . | . | . | . |
| .         | .                  | .                  | . | . | . | . | . |
| .         | .                  | .                  | . | . | . | . | . |
| Vv11g1082 | Tc09_g016580       | Gorai.004G101300.1 | . | . | . | . | . |
| .         | .                  | .                  | . | . | . | . | . |
| .         | .                  | .                  | . | . | . | . | . |
| Vv11g1083 | .                  | .                  | . | . | . | . | . |

|              |                    |  |  |                    |        |  |
|--------------|--------------------|--|--|--------------------|--------|--|
| Vv11g1084    |                    |  |  |                    |        |  |
| Vv11g1085    |                    |  |  |                    |        |  |
| Vv11g1086    | Tc09_g016550       |  |  | Gorai.004G101500.1 |        |  |
| Vv11g1087    |                    |  |  |                    |        |  |
| Vv11g1088    | Tc09_g016540       |  |  | Gorai.004G101600.1 |        |  |
| Vv11g1089    |                    |  |  |                    |        |  |
| Vv11g1090    |                    |  |  |                    |        |  |
| Vv11g1091    |                    |  |  |                    |        |  |
| Vv11g1092    | Tc09_g016360       |  |  | Gorai.004G101800.1 |        |  |
|              | Gorai.009G006900.1 |  |  |                    |        |  |
| Vv11g1093    |                    |  |  | Gorai.004G030800.1 |        |  |
| Vv11g1094    |                    |  |  |                    |        |  |
| Vv11g1095    |                    |  |  |                    |        |  |
| Vv11g1096    |                    |  |  |                    |        |  |
| Vv11g1097    |                    |  |  | Gorai.004G030900.1 |        |  |
| Vv11g1098    |                    |  |  |                    |        |  |
| Vv11g1099    | Tc09_g016270       |  |  | Gorai.013G246000.1 | Gorai. |  |
| 004G102000.1 |                    |  |  |                    |        |  |

|                    |                    |                    |
|--------------------|--------------------|--------------------|
| Vv11g1100          | Tc09_g016230       | Gorai.004G102100.1 |
| Vv11g1101          | Tc09_g016200       | Gorai.004G102300.1 |
| Vv11g1102          |                    |                    |
| Vv11g1103          |                    |                    |
| Vv11g1104          |                    | Gorai.004G103700.1 |
| Vv11g1105          |                    |                    |
| Vv11g1106          | Gorai.013G243100.1 |                    |
| Gorai.009G007300.1 |                    |                    |
| Vv11g1107          |                    |                    |
| Vv12g0001          |                    |                    |
| Vv12g0002          | Tc01_g040310       |                    |
| Vv12g0003          |                    |                    |
| Vv12g0004          |                    |                    |
| Vv12g0005          |                    |                    |
| Vv12g0006          |                    |                    |
| Vv12g0007          |                    |                    |
| Vv12g0008          | Tc01_g002220       | Gorai.008G064700.1 |

|           |              |                    |   |   |   |   |   |
|-----------|--------------|--------------------|---|---|---|---|---|
| Vv12g0009 | .            | .                  | . | . | . | . | . |
| .         | .            | .                  | . | . | . | . | . |
| Vv12g0010 | .            | .                  | . | . | . | . | . |
| .         | .            | .                  | . | . | . | . | . |
| Vv12g0011 | .            | .                  | . | . | . | . | . |
| .         | .            | .                  | . | . | . | . | . |
| Vv12g0012 | Tc01_g040190 | .                  | . | . | . | . | . |
| .         | .            | .                  | . | . | . | . | . |
| Vv12g0013 | .            | .                  | . | . | . | . | . |
| .         | .            | .                  | . | . | . | . | . |
| Vv12g0014 | .            | .                  | . | . | . | . | . |
| .         | .            | .                  | . | . | . | . | . |
| Vv12g0015 | .            | .                  | . | . | . | . | . |
| .         | .            | .                  | . | . | . | . | . |
| Vv12g0016 | .            | .                  | . | . | . | . | . |
| .         | .            | .                  | . | . | . | . | . |
| Vv12g0017 | .            | .                  | . | . | . | . | . |
| .         | .            | .                  | . | . | . | . | . |
| Vv12g0018 | .            | .                  | . | . | . | . | . |
| .         | .            | .                  | . | . | . | . | . |
| Vv12g0019 | .            | .                  | . | . | . | . | . |
| .         | .            | .                  | . | . | . | . | . |
| Vv12g0020 | .            | .                  | . | . | . | . | . |
| .         | .            | .                  | . | . | . | . | . |
| Vv12g0021 | .            | .                  | . | . | . | . | . |
| .         | .            | .                  | . | . | . | . | . |
| Vv12g0022 | Tc01_g002250 | Gorai.007G043400.1 | . | . | . | . | . |
| .         | .            | .                  | . | . | . | . | . |
| Vv12g0023 | .            | .                  | . | . | . | . | . |
| .         | .            | .                  | . | . | . | . | . |
| Vv12g0024 | .            | .                  | . | . | . | . | . |
| .         | .            | .                  | . | . | . | . | . |
| Vv12g0025 | .            | .                  | . | . | . | . | . |

|              |                    |                    |   |   |   |        |   |
|--------------|--------------------|--------------------|---|---|---|--------|---|
| .            | .                  | .                  | . | . | . | .      | . |
| .            | .                  | .                  | . | . | . | .      | . |
| Vv12g0026    | .                  | .                  | . | . | . | .      | . |
| .            | .                  | .                  | . | . | . | .      | . |
| Vv12g0027    | .                  | .                  | . | . | . | .      | . |
| .            | .                  | .                  | . | . | . | .      | . |
| Vv12g0028    | .                  | .                  | . | . | . | .      | . |
| .            | .                  | .                  | . | . | . | .      | . |
| Vv12g0029    | .                  | .                  | . | . | . | .      | . |
| .            | .                  | .                  | . | . | . | .      | . |
| Vv12g0030    | .                  | .                  | . | . | . | .      | . |
| .            | .                  | .                  | . | . | . | .      | . |
| Vv12g0031    | .                  | .                  | . | . | . | .      | . |
| .            | .                  | .                  | . | . | . | .      | . |
| Vv12g0032    | .                  | .                  | . | . | . | .      | . |
| .            | .                  | .                  | . | . | . | .      | . |
| Vv12g0033    | .                  | .                  | . | . | . | .      | . |
| .            | .                  | .                  | . | . | . | .      | . |
| Vv12g0034    | Tc01_g002410       | .                  | . | . | . | Gorai. | . |
| 003G012100.1 | .                  | .                  | . | . | . | .      | . |
| .            | .                  | .                  | . | . | . | .      | . |
| Vv12g0035    | .                  | .                  | . | . | . | .      | . |
| .            | .                  | .                  | . | . | . | .      | . |
| Vv12g0036    | .                  | .                  | . | . | . | .      | . |
| .            | .                  | .                  | . | . | . | .      | . |
| Vv12g0037    | .                  | .                  | . | . | . | .      | . |
| .            | .                  | .                  | . | . | . | .      | . |
| Vv12g0038    | .                  | .                  | . | . | . | .      | . |
| .            | .                  | .                  | . | . | . | .      | . |
| Vv12g0039    | .                  | .                  | . | . | . | .      | . |
| .            | .                  | .                  | . | . | . | .      | . |
| Vv12g0040    | Tc01_g002590       | Gorai.007G050000.1 | . | . | . | Gorai. | . |
| 008G065400.1 | Gorai.003G012800.1 | .                  | . | . | . | .      | . |
| .            | .                  | .                  | . | . | . | .      | . |
| .            | .                  | .                  | . | . | . | .      | . |
| Vv12g0041    | .                  | .                  | . | . | . | .      | . |
| .            | .                  | .                  | . | . | . | .      | . |

|              |              |   |   |   |   |        |   |
|--------------|--------------|---|---|---|---|--------|---|
| Vv12g0042    | .            | . | . | . | . | .      | . |
| .            | .            | . | . | . | . | .      | . |
| Vv12g0043    | .            | . | . | . | . | .      | . |
| .            | .            | . | . | . | . | .      | . |
| Vv12g0044    | .            | . | . | . | . | .      | . |
| .            | .            | . | . | . | . | .      | . |
| Vv12g0045    | .            | . | . | . | . | .      | . |
| .            | .            | . | . | . | . | .      | . |
| Vv12g0046    | .            | . | . | . | . | .      | . |
| .            | .            | . | . | . | . | .      | . |
| Vv12g0047    | .            | . | . | . | . | .      | . |
| .            | .            | . | . | . | . | .      | . |
| Vv12g0048    | .            | . | . | . | . | .      | . |
| .            | .            | . | . | . | . | .      | . |
| Vv12g0049    | Tc01_g002880 | . | . | . | . | .      | . |
| .            | .            | . | . | . | . | .      | . |
| Vv12g0050    | .            | . | . | . | . | .      | . |
| .            | .            | . | . | . | . | .      | . |
| Vv12g0051    | .            | . | . | . | . | .      | . |
| .            | .            | . | . | . | . | .      | . |
| Vv12g0052    | .            | . | . | . | . | .      | . |
| .            | .            | . | . | . | . | .      | . |
| Vv12g0053    | .            | . | . | . | . | .      | . |
| .            | .            | . | . | . | . | .      | . |
| Vv12g0054    | .            | . | . | . | . | Gorai. | . |
| 001G093000.1 | .            | . | . | . | . | .      | . |
| .            | .            | . | . | . | . | .      | . |
| Vv12g0055    | .            | . | . | . | . | .      | . |
| .            | .            | . | . | . | . | .      | . |
| Vv12g0056    | .            | . | . | . | . | .      | . |
| .            | .            | . | . | . | . | .      | . |
| Vv12g0057    | .            | . | . | . | . | .      | . |
| .            | .            | . | . | . | . | .      | . |
| Vv12g0058    | .            | . | . | . | . | .      | . |

|                    |              |  |  |                    |  |  |
|--------------------|--------------|--|--|--------------------|--|--|
| Vv12g0059          |              |  |  |                    |  |  |
| Vv12g0060          |              |  |  |                    |  |  |
| Vv12g0061          |              |  |  |                    |  |  |
| Vv12g0062          |              |  |  |                    |  |  |
| Vv12g0063          |              |  |  |                    |  |  |
| Vv12g0064          |              |  |  |                    |  |  |
| Vv12g0065          | Tc01_g031820 |  |  | Gorai.008G138500.1 |  |  |
| Vv12g0066          |              |  |  |                    |  |  |
| Vv12g0067          |              |  |  |                    |  |  |
| Vv12g0068          |              |  |  |                    |  |  |
| Vv12g0069          | Tc01_g016860 |  |  |                    |  |  |
| Vv12g0070          |              |  |  |                    |  |  |
| Vv12g0071          |              |  |  |                    |  |  |
| Vv12g0072          |              |  |  |                    |  |  |
| Vv12g0073          |              |  |  |                    |  |  |
| Vv12g0074          | Tc01_g016800 |  |  |                    |  |  |
| Gorai.001G092400.1 |              |  |  |                    |  |  |

|                    |                    |                    |                    |   |   |
|--------------------|--------------------|--------------------|--------------------|---|---|
| Vv12g0075          | Tc01_g016790       | .                  | .                  | . | . |
| Gorai.001G092300.1 | .                  | .                  | .                  | . | . |
| Vv12g0076          | Tc01_g016780       | .                  | Gorai.001G211700.1 | . | . |
| .                  | Gorai.001G092200.1 | .                  | .                  | . | . |
| .                  | .                  | .                  | .                  | . | . |
| Vv12g0077          | .                  | .                  | .                  | . | . |
| .                  | .                  | .                  | .                  | . | . |
| Vv12g0078          | Tc01_g016760       | .                  | Gorai.001G211500.1 | . | . |
| .                  | .                  | .                  | .                  | . | . |
| Vv12g0079          | Gorai.007G173500.1 | .                  | .                  | . | . |
| .                  | .                  | .                  | .                  | . | . |
| Vv12g0080          | Tc01_g016730       | .                  | .                  | . | . |
| Gorai.001G092100.1 | .                  | .                  | .                  | . | . |
| Vv12g0081          | Tc01_g016720       | .                  | .                  | . | . |
| .                  | .                  | .                  | .                  | . | . |
| Vv12g0082          | Tc01_g016710       | Gorai.007G174900.1 | .                  | . | . |
| .                  | .                  | .                  | .                  | . | . |
| Vv12g0083          | .                  | .                  | .                  | . | . |
| .                  | .                  | .                  | .                  | . | . |
| Vv12g0084          | Tc01_g015210       | .                  | .                  | . | . |
| Gorai.001G092000.1 | .                  | .                  | .                  | . | . |
| Vv12g0085          | .                  | .                  | .                  | . | . |
| .                  | .                  | .                  | .                  | . | . |
| Vv12g0086          | Tc01_g015200       | .                  | .                  | . | . |
| .                  | .                  | .                  | .                  | . | . |
| Vv12g0087          | .                  | .                  | .                  | . | . |
| .                  | .                  | .                  | .                  | . | . |
| Vv12g0088          | Gorai.007G175000.1 | .                  | .                  | . | . |
| .                  | .                  | .                  | .                  | . | . |
| Vv12g0089          | Tc01_g015170       | .                  | .                  | . | . |
| .                  | .                  | .                  | .                  | . | . |
| Vv12g0090          | Tc01_g015160       | .                  | .                  | . | . |
| .                  | .                  | .                  | .                  | . | . |
| Vv12g0091          | .                  | .                  | .                  | . | . |



|           |              |                    |  |  |  |  |
|-----------|--------------|--------------------|--|--|--|--|
| Vv12g0092 |              |                    |  |  |  |  |
| Vv12g0093 | Tc01_g015140 | Gorai.007G175100.1 |  |  |  |  |
| Vv12g0094 | Tc01_g015120 |                    |  |  |  |  |
| Vv12g0095 |              |                    |  |  |  |  |
| Vv12g0096 |              |                    |  |  |  |  |
| Vv12g0097 | Tc01_g015090 |                    |  |  |  |  |
| Vv12g0098 | Tc01_g015070 |                    |  |  |  |  |
| Vv12g0099 |              |                    |  |  |  |  |
| Vv12g0100 |              |                    |  |  |  |  |
| Vv12g0101 |              |                    |  |  |  |  |
| Vv12g0102 |              |                    |  |  |  |  |
| Vv12g0103 |              |                    |  |  |  |  |
| Vv12g0104 | Tc01_g032050 | Gorai.008G137800.1 |  |  |  |  |
| Vv12g0105 | Tc01_g015060 |                    |  |  |  |  |
| Vv12g0106 | Tc01_g010590 |                    |  |  |  |  |
| Vv12g0107 | Tc01_g015050 |                    |  |  |  |  |

|             |              |   |                    |   |   |
|-------------|--------------|---|--------------------|---|---|
| Vv12g0108   | Tc01_g015040 | . | .                  | . | . |
| .           | .            | . | .                  | . | . |
| Vv12g0109   | Tc01_g015000 | . | .                  | . | . |
| .           | .            | . | .                  | . | . |
| Vv12g0110   | Tc01_g014990 | . | .                  | . | . |
| .           | .            | . | .                  | . | . |
| Vv12g0111   | Tc01_g014950 | . | Gorai.008G099600.1 | . | . |
| .           | .            | . | .                  | . | . |
| Vv12g0112   | Tc01_g039880 | . | Gorai.008G111100.1 | . | . |
| .           | .            | . | .                  | . | . |
| Vv12g0113   | Tc01_g014920 | . | .                  | . | . |
|             | Vv0Unrg9177  | . | .                  | . | . |
| .           | .            | . | .                  | . | . |
| Vv12g0114   | .            | . | .                  | . | . |
| .           | .            | . | .                  | . | . |
| Vv12g0115   | Tc01_g014910 | . | Gorai.008G097100.1 | . | . |
| .           | Vv0Unrg9178  | . | .                  | . | . |
| .           | .            | . | .                  | . | . |
| Vv12g0116   | .            | . | .                  | . | . |
| .           | .            | . | .                  | . | . |
| Vv12g0117   | .            | . | .                  | . | . |
| .           | .            | . | .                  | . | . |
| Vv12g0118   | .            | . | .                  | . | . |
| .           | .            | . | .                  | . | . |
| Vv12g0119   | .            | . | .                  | . | . |
| Vv0Unrg9191 | .            | . | .                  | . | . |
| .           | .            | . | .                  | . | . |
| Vv12g0120   | Tc01_g014840 | . | .                  | . | . |
| .           | .            | . | .                  | . | . |
| Vv12g0121   | .            | . | .                  | . | . |
| .           | .            | . | .                  | . | . |
| Vv12g0122   | .            | . | .                  | . | . |
| .           | .            | . | .                  | . | . |
| Vv12g0123   | .            | . | .                  | . | . |
| .           | .            | . | .                  | . | . |
| Vv12g0124   | .            | . | .                  | . | . |

|             |              |  |  |                    |  |  |  |
|-------------|--------------|--|--|--------------------|--|--|--|
| Vv12g0125   |              |  |  |                    |  |  |  |
| Vv12g0126   |              |  |  |                    |  |  |  |
| Vv12g0127   |              |  |  |                    |  |  |  |
| Vv12g0128   | Tc01_g032480 |  |  | Gorai.008G136700.1 |  |  |  |
|             | Vv0Unrg9198  |  |  |                    |  |  |  |
| Vv12g0129   |              |  |  |                    |  |  |  |
| Vv12g0130   |              |  |  |                    |  |  |  |
| Vv0Unrg9199 |              |  |  |                    |  |  |  |
| Vv12g0131   |              |  |  |                    |  |  |  |
| Vv0Unrg9200 |              |  |  |                    |  |  |  |
| Vv12g0132   |              |  |  |                    |  |  |  |
| Vv12g0133   |              |  |  |                    |  |  |  |
| Vv12g0134   |              |  |  |                    |  |  |  |
| Vv12g0135   |              |  |  |                    |  |  |  |
| Vv12g0136   |              |  |  |                    |  |  |  |
| Vv12g0137   |              |  |  |                    |  |  |  |
| Vv12g0138   |              |  |  |                    |  |  |  |
| Vv12g0139   |              |  |  |                    |  |  |  |
| Vv12g0140   |              |  |  |                    |  |  |  |

|                    |              |   |   |                    |           |
|--------------------|--------------|---|---|--------------------|-----------|
| Vv12g0141          | Tc01_g010170 | . | . | .                  | .         |
| .                  | .            | . | . | .                  | .         |
| Vv12g0142          | .            | . | . | .                  | .         |
| .                  | .            | . | . | .                  | .         |
| Gorai.010G240800.1 | .            | . | . | Gorai.011G036400.1 | Vv10g0192 |
| Vv12g0143          | .            | . | . | .                  | .         |
| .                  | .            | . | . | .                  | .         |
| Vv12g0144          | .            | . | . | .                  | .         |
| .                  | .            | . | . | .                  | .         |
| Vv12g0145          | Tc01_g039490 | . | . | .                  | .         |
| .                  | .            | . | . | .                  | .         |
| Vv12g0146          | Tc01_g039480 | . | . | .                  | .         |
| .                  | .            | . | . | .                  | .         |
| Vv12g0147          | .            | . | . | .                  | .         |
| .                  | .            | . | . | .                  | .         |
| Vv12g0148          | Tc01_g039470 | . | . | .                  | .         |
| .                  | .            | . | . | .                  | .         |
| Vv12g0149          | .            | . | . | .                  | .         |
| .                  | .            | . | . | .                  | .         |
| Vv12g0150          | .            | . | . | .                  | .         |
| .                  | .            | . | . | .                  | .         |
| Vv12g0151          | .            | . | . | .                  | .         |
| .                  | .            | . | . | .                  | .         |
| Vv12g0152          | .            | . | . | .                  | .         |
| .                  | .            | . | . | .                  | .         |
| Vv12g0153          | Tc01_g039420 | . | . | .                  | .         |
| .                  | .            | . | . | .                  | .         |
| Vv12g0154          | Tc01_g039410 | . | . | .                  | .         |
| .                  | .            | . | . | .                  | .         |
| Vv12g0155          | .            | . | . | .                  | .         |
| .                  | .            | . | . | .                  | .         |
| Vv12g0156          | .            | . | . | .                  | .         |
| .                  | .            | . | . | .                  | .         |
| .                  | .            | . | . | .                  | .         |

|                    |                    |                    |   |                    |   |           |   |
|--------------------|--------------------|--------------------|---|--------------------|---|-----------|---|
| Vv12g0157          | .                  | .                  | . | .                  | . | .         | . |
| .                  | .                  | .                  | . | .                  | . | .         | . |
| Vv12g0158          | .                  | .                  | . | .                  | . | .         | . |
| .                  | .                  | .                  | . | .                  | . | .         | . |
| Vv12g0159          | Tc01_g014770       | .                  | . | .                  | . | .         | . |
| .                  | .                  | .                  | . | .                  | . | .         | . |
| Vv12g0160          | .                  | .                  | . | .                  | . | .         | . |
| .                  | .                  | .                  | . | .                  | . | .         | . |
| Vv12g0161          | .                  | .                  | . | .                  | . | .         | . |
| .                  | .                  | .                  | . | .                  | . | .         | . |
| Vv12g0162          | .                  | .                  | . | .                  | . | .         | . |
| .                  | .                  | .                  | . | .                  | . | .         | . |
| Vv12g0163          | Tc01_g006040       | .                  | . | Gorai.008G079700.1 | . | .         | . |
|                    | Gorai.003G028100.1 | .                  | . | .                  | . | .         | . |
| .                  | .                  | .                  | . | .                  | . | .         | . |
| Vv12g0164          | .                  | .                  | . | .                  | . | .         | . |
| .                  | .                  | .                  | . | .                  | . | .         | . |
| Vv12g0165          | Tc01_g005950       | .                  | . | Gorai.008G079500.1 | . | .         | . |
| .                  | .                  | .                  | . | .                  | . | .         | . |
| Vv12g0166          | .                  | .                  | . | .                  | . | .         | . |
| .                  | .                  | .                  | . | .                  | . | .         | . |
| Vv12g0167          | Tc01_g039170       | .                  | . | .                  | . | .         | . |
| .                  | .                  | .                  | . | .                  | . | .         | . |
| Vv12g0168          | .                  | .                  | . | .                  | . | .         | . |
| .                  | .                  | .                  | . | .                  | . | .         | . |
| Vv12g0169          | .                  | .                  | . | .                  | . | .         | . |
|                    | Tc06_g013530       | .                  | . | .                  | . | Vv10g0183 | . |
| Gorai.011G037000.1 | Gorai.010G241200.1 | .                  | . | Gorai.009G160400.1 | . | .         | . |
| Vv12g0170          | Tc01_g014750       | .                  | . | .                  | . | .         | . |
|                    | Vv0Unrg9240        | .                  | . | .                  | . | .         | . |
|                    | Vv10g0178          | Tc06_g013990       | . | Gorai.010G161000.1 | . | .         | . |
|                    | Gorai.009G160800.1 | Gorai.011G037500.1 | . | .                  | . | .         | . |
| Vv12g0171          | .                  | .                  | . | .                  | . | .         | . |
| .                  | .                  | .                  | . | .                  | . | .         | . |
| Vv12g0172          | .                  | .                  | . | .                  | . | .         | . |
| Vv10g0175          | Tc06_g014020       | .                  | . | Gorai.010G160700.1 | . | .         | . |

|                    |                    |                    |        |   |        |   |
|--------------------|--------------------|--------------------|--------|---|--------|---|
| Gorai.009G161100.1 | .                  | .                  | .      | . | .      | . |
| Vv12g0173          | .                  | .                  | .      | . | .      | . |
| Vv12g0174          | .                  | .                  | .      | . | .      | . |
| Vv12g0175          | .                  | .                  | .      | . | .      | . |
| Vv12g0176          | .                  | .                  | .      | . | .      | . |
| Vv12g0177          | .                  | .                  | .      | . | .      | . |
| Vv12g0178          | .                  | .                  | .      | . | .      | . |
| Vv10g0169          | Tc06_g014090       | Gorai.006G089700.1 | Gorai. |   |        |   |
| 010G160100.1       | Gorai.009G161300.1 | Gorai.011G038200.1 |        |   |        |   |
| Gorai.010G241400.1 | .                  | .                  | .      | . | .      | . |
| Vv12g0179          | .                  | .                  | .      | . | .      | . |
| Vv12g0180          | Tc01_g014580       | .                  | .      | . | .      | . |
| Vv12g0181          | .                  | .                  | .      | . | .      | . |
| Vv12g0182          | .                  | .                  | .      | . | .      | . |
| Vv12g0183          | .                  | .                  | .      | . | .      | . |
| Vv12g0184          | .                  | .                  | .      | . | .      | . |
| Vv12g0185          | Tc01_g001190       | .                  | .      | . | Gorai. | . |
| 003G006600.1       | .                  | .                  | .      | . | .      | . |
| Vv12g0186          | Tc01_g014260       | .                  | .      | . | .      | . |
| Vv12g0187          | .                  | .                  | .      | . | .      | . |
| Vv12g0188          | .                  | .                  | .      | . | .      | . |

|           |              |   |   |   |                    |   |   |
|-----------|--------------|---|---|---|--------------------|---|---|
| .         | .            | . | . | . | .                  | . | . |
| .         | .            | . | . | . | .                  | . | . |
| Vv12g0189 | .            | . | . | . | .                  | . | . |
| .         | .            | . | . | . | .                  | . | . |
| Vv12g0190 | .            | . | . | . | .                  | . | . |
| .         | .            | . | . | . | .                  | . | . |
| Vv12g0191 | .            | . | . | . | .                  | . | . |
| .         | .            | . | . | . | .                  | . | . |
| Vv12g0192 | .            | . | . | . | .                  | . | . |
| .         | .            | . | . | . | .                  | . | . |
| Vv12g0193 | .            | . | . | . | .                  | . | . |
| .         | .            | . | . | . | .                  | . | . |
| Vv12g0194 | .            | . | . | . | .                  | . | . |
| .         | .            | . | . | . | .                  | . | . |
| Vv12g0195 | .            | . | . | . | .                  | . | . |
| .         | .            | . | . | . | .                  | . | . |
| Vv12g0196 | .            | . | . | . | .                  | . | . |
| .         | .            | . | . | . | .                  | . | . |
| Vv12g0197 | .            | . | . | . | .                  | . | . |
| .         | .            | . | . | . | .                  | . | . |
| Vv12g0198 | .            | . | . | . | .                  | . | . |
| .         | .            | . | . | . | .                  | . | . |
| Vv12g0199 | .            | . | . | . | .                  | . | . |
| .         | .            | . | . | . | .                  | . | . |
| Vv12g0200 | .            | . | . | . | .                  | . | . |
| .         | .            | . | . | . | .                  | . | . |
| Vv12g0201 | .            | . | . | . | .                  | . | . |
| .         | .            | . | . | . | .                  | . | . |
| Vv12g0202 | Tc01_g013990 | . | . | . | .                  | . | . |
| .         | .            | . | . | . | .                  | . | . |
| Vv12g0203 | .            | . | . | . | .                  | . | . |
| Vv19g0130 | .            | . | . | . | Gorai.009G367300.1 | . | . |
| .         | .            | . | . | . | .                  | . | . |
| Vv12g0204 | .            | . | . | . | .                  | . | . |
| .         | .            | . | . | . | .                  | . | . |
| .         | .            | . | . | . | .                  | . | . |

|                    |              |                    |   |   |   |                    |   |
|--------------------|--------------|--------------------|---|---|---|--------------------|---|
| Vv12g0205          | .            | .                  | . | . | . | .                  | . |
| .                  | .            | .                  | . | . | . | .                  | . |
| Vv12g0206          | .            | .                  | . | . | . | .                  | . |
| .                  | .            | .                  | . | . | . | .                  | . |
| Vv12g0207          | .            | .                  | . | . | . | .                  | . |
| .                  | .            | .                  | . | . | . | .                  | . |
| Vv12g0208          | .            | .                  | . | . | . | .                  | . |
| .                  | .            | .                  | . | . | . | Vv10g0152          | . |
| Tc06_g014230       | .            | .                  | . | . | . | .                  | . |
| Vv12g0209          | .            | .                  | . | . | . | .                  | . |
| .                  | .            | .                  | . | . | . | Vv10g0151          | . |
| .                  | .            | Gorai.010G159700.1 | . | . | . | Gorai.009G161800.1 | . |
| Gorai.011G039000.1 | .            | .                  | . | . | . | .                  | . |
| Vv12g0210          | .            | .                  | . | . | . | .                  | . |
| .                  | .            | .                  | . | . | . | .                  | . |
| Vv12g0211          | .            | .                  | . | . | . | .                  | . |
| .                  | .            | .                  | . | . | . | .                  | . |
| Vv12g0212          | Tc01_g013820 | .                  | . | . | . | .                  | . |
| .                  | .            | .                  | . | . | . | .                  | . |
| Vv10g0149          | Tc06_g014260 | .                  | . | . | . | Gorai.009G161900.1 | . |
| Gorai.011G039100.1 | .            | .                  | . | . | . | .                  | . |
| Vv12g0213          | .            | .                  | . | . | . | .                  | . |
| .                  | .            | .                  | . | . | . | .                  | . |
| Vv12g0214          | Tc01_g013810 | .                  | . | . | . | .                  | . |
| .                  | .            | .                  | . | . | . | .                  | . |
| Vv12g0215          | Tc01_g013800 | .                  | . | . | . | .                  | . |
| .                  | .            | .                  | . | . | . | .                  | . |
| Vv12g0216          | .            | .                  | . | . | . | .                  | . |
| .                  | .            | .                  | . | . | . | Vv10g0141          | . |
| Tc06_g014330       | .            | .                  | . | . | . | Gorai.009G162200.1 | . |
| Gorai.011G039600.1 | .            | .                  | . | . | . | .                  | . |
| Vv12g0217          | .            | .                  | . | . | . | .                  | . |
| .                  | .            | .                  | . | . | . | .                  | . |
| Vv12g0218          | Tc01_g013690 | .                  | . | . | . | .                  | . |
| .                  | .            | .                  | . | . | . | .                  | . |
| Vv12g0219          | .            | .                  | . | . | . | .                  | . |
| Vv19g0143          | .            | Gorai.013G173500.1 | . | . | . | Gorai.             | . |
| 002G061400.1       | .            | .                  | . | . | . | .                  | . |
| .                  | .            | .                  | . | . | . | .                  | . |
| Vv12g0220          | Tc01_g001320 | .                  | . | . | . | .                  | . |



|                    |                    |                    |                    |
|--------------------|--------------------|--------------------|--------------------|
| Vv10g0132          | Tc06_g014440       | Gorai.006G088900.1 | .                  |
| Gorai.009G162900.1 | .                  | .                  | .                  |
| Vv12g0221          | .                  | .                  | .                  |
| .                  | .                  | .                  | .                  |
| Vv12g0222          | .                  | .                  | .                  |
| .                  | .                  | .                  | .                  |
| Vv12g0223          | .                  | .                  | .                  |
| .                  | .                  | .                  | .                  |
| Vv12g0224          | Tc01_g001340       | .                  | Gorai.007G192200.1 |
| .                  | Vv19g0150          | .                  | Gorai.013G173200.1 |
| Gorai.007G326600.1 | .                  | Gorai.002G061700.1 | Gorai.             |
| 009G368300.1       | .                  | .                  | .                  |
| Vv12g0225          | Tc01_g013620       | .                  | .                  |
| .                  | .                  | .                  | .                  |
| Vv10g0131          | Tc06_g014450       | .                  | Gorai.009G163100.1 |
| .                  | Gorai.010G242000.1 | .                  | .                  |
| Vv12g0226          | Tc01_g013610       | .                  | .                  |
| .                  | .                  | .                  | .                  |
| Vv12g0227          | Tc01_g013590       | .                  | .                  |
| .                  | .                  | .                  | .                  |
| Vv12g0228          | Tc01_g013580       | .                  | .                  |
| .                  | .                  | .                  | .                  |
| Vv12g0229          | .                  | .                  | .                  |
| .                  | .                  | .                  | .                  |
| Vv12g0230          | .                  | .                  | .                  |
| .                  | .                  | .                  | .                  |
| Vv12g0231          | Tc01_g001670       | .                  | Gorai.007G194500.1 |
| Gorai.003G009500.1 | .                  | Gorai.011G098300.1 | .                  |
| .                  | .                  | .                  | .                  |
| Vv12g0232          | .                  | .                  | Vv10g0122          |
| Tc06_g014560       | .                  | .                  | .                  |
| Vv12g0233          | .                  | .                  | Vv10g0121          |
| Tc06_g014580       | .                  | .                  | .                  |
| Vv12g0234          | Tc01_g019120       | .                  | .                  |
| .                  | .                  | .                  | .                  |
| Vv12g0235          | Tc01_g013560       | .                  | .                  |

|           |                    |                    |   |                    |   |           |   |
|-----------|--------------------|--------------------|---|--------------------|---|-----------|---|
| .         | .                  | .                  | . | .                  | . | .         | . |
| .         | .                  | .                  | . | .                  | . | .         | . |
| Vv12g0236 | .                  | .                  | . | .                  | . | .         | . |
| .         | .                  | .                  | . | .                  | . | .         | . |
| Vv12g0237 | Tc01_g013550       | .                  | . | .                  | . | .         | . |
| .         | .                  | .                  | . | .                  | . | .         | . |
| Vv12g0238 | Tc01_g013540       | .                  | . | .                  | . | .         | . |
| .         | .                  | .                  | . | .                  | . | .         | . |
| Vv12g0239 | Tc01_g013530       | .                  | . | .                  | . | .         | . |
| .         | .                  | .                  | . | .                  | . | .         | . |
| Vv12g0240 | Tc01_g013520       | .                  | . | .                  | . | .         | . |
| .         | .                  | .                  | . | .                  | . | .         | . |
| Vv12g0241 | .                  | .                  | . | .                  | . | .         | . |
| .         | .                  | .                  | . | .                  | . | .         | . |
| Vv12g0242 | Tc01_g013500       | .                  | . | .                  | . | .         | . |
| .         | .                  | .                  | . | .                  | . | .         | . |
| Vv10g0119 | Tc06_g014600       | Gorai.006G088800.1 | . | .                  | . | .         | . |
|           | Gorai.011G033800.1 | Gorai.010G242200.1 | . | .                  | . | .         | . |
| Vv12g0243 | Tc01_g001700       | .                  | . | .                  | . | .         | . |
| .         | .                  | .                  | . | .                  | . | .         | . |
| Vv12g0244 | .                  | .                  | . | .                  | . | .         | . |
| .         | .                  | .                  | . | .                  | . | .         | . |
| Vv12g0245 | .                  | .                  | . | .                  | . | .         | . |
| .         | .                  | .                  | . | .                  | . | .         | . |
| Vv12g0246 | Tc01_g013490       | .                  | . | .                  | . | .         | . |
|           | Vv19g0164          | Tc07_g009400       | . | .                  | . | .         | . |
| .         | .                  | .                  | . | .                  | . | .         | . |
| Vv12g0247 | .                  | .                  | . | .                  | . | .         | . |
| .         | .                  | .                  | . | .                  | . | .         | . |
| Vv12g0248 | .                  | .                  | . | .                  | . | .         | . |
| .         | .                  | .                  | . | .                  | . | .         | . |
| Vv12g0249 | .                  | .                  | . | .                  | . | .         | . |
|           | Tc06_g014640       | .                  | . | .                  | . | Vv10g0116 | . |
|           | Gorai.011G033600.1 | .                  | . | Gorai.009G163800.1 | . | .         | . |
| Vv12g0250 | .                  | .                  | . | .                  | . | .         | . |
| .         | .                  | .                  | . | .                  | . | .         | . |
| Vv12g0251 | .                  | .                  | . | .                  | . | .         | . |

|                    |                    |                    |                    |                    |           |           |
|--------------------|--------------------|--------------------|--------------------|--------------------|-----------|-----------|
|                    |                    |                    |                    |                    |           | Vv10g0105 |
|                    | Tc06_g014740       |                    |                    | Gorai.009G164200.1 |           |           |
| Vv12g0252          |                    |                    |                    |                    |           |           |
| Vv12g0253          |                    |                    |                    |                    |           |           |
| Vv19g0168          | Tc07_g009360       |                    |                    | Gorai.002G063500.1 |           |           |
|                    | Gorai.009G372700.1 |                    |                    |                    |           |           |
| Vv12g0254          | Tc01_g018850       |                    |                    |                    |           |           |
| Vv12g0255          |                    |                    |                    |                    |           |           |
| Vv19g0171          | Tc07_g009290       | Gorai.013G172800.1 |                    |                    |           |           |
| Gorai.002G064500.1 | Gorai.009G373000.1 |                    |                    |                    | Vv10g0090 |           |
| Vv12g0256          |                    |                    |                    |                    |           |           |
| Vv12g0257          |                    |                    |                    |                    |           |           |
| Vv12g0258          |                    |                    |                    |                    |           |           |
| Vv19g0174          | Tc07_g009260       |                    | Gorai.007G325800.1 |                    |           |           |
|                    | Vv10g0087          |                    | Tc06_g014890       |                    |           |           |
| Vv12g0259          |                    |                    |                    |                    |           |           |
| Vv19g0175          | Tc07_g009250       |                    |                    | Gorai.002G064800.1 |           |           |
| Vv12g0260          |                    |                    |                    |                    |           |           |
| Vv19g0177          |                    |                    |                    |                    |           |           |
| Vv12g0261          |                    |                    |                    |                    |           |           |
| Vv12g0262          |                    |                    |                    |                    |           |           |
| Vv12g0263          |                    |                    |                    |                    |           |           |
| Vv12g0264          |                    |                    |                    |                    |           |           |
| Vv12g0265          |                    |                    |                    |                    |           |           |
| Vv19g0182          | Tc07_g009200       | Gorai.013G172500.1 |                    |                    | Gorai.    |           |
| 007G325700.1       | Gorai.002G064900.1 |                    |                    |                    |           |           |

|              |                    |   |                    |   |   |           |   |
|--------------|--------------------|---|--------------------|---|---|-----------|---|
| Vv12g0266    | .                  | . | .                  | . | . | .         | . |
| .            | .                  | . | .                  | . | . | .         | . |
| Vv12g0267    | Tc01_g018550       | . | .                  | . | . | .         | . |
| .            | .                  | . | .                  | . | . | .         | . |
| Vv12g0268    | .                  | . | .                  | . | . | .         | . |
| .            | .                  | . | .                  | . | . | .         | . |
| Vv12g0269    | .                  | . | .                  | . | . | .         | . |
| Vv06g0393    | .                  | . | .                  | . | . | .         | . |
| .            | .                  | . | .                  | . | . | .         | . |
| Vv12g0270    | Tc01_g040940       | . | .                  | . | . | .         | . |
| .            | .                  | . | .                  | . | . | .         | . |
| Vv10g0066    | Tc06_g015030       | . | .                  | . | . | Gorai.    | . |
| 011G031400.1 | Gorai.010G242900.1 | . | .                  | . | . | .         | . |
| Vv12g0271    | .                  | . | .                  | . | . | .         | . |
| Vv06g0377    | .                  | . | Gorai.001G130700.1 | . | . | .         | . |
| .            | .                  | . | .                  | . | . | .         | . |
| Vv12g0272    | Tc01_g010210       | . | .                  | . | . | .         | . |
| .            | .                  | . | .                  | . | . | .         | . |
| Vv12g0273    | .                  | . | .                  | . | . | .         | . |
| Vv06g0369    | .                  | . | .                  | . | . | Gorai.    | . |
| 006G120500.1 | .                  | . | .                  | . | . | .         | . |
| Vv12g0274    | .                  | . | .                  | . | . | .         | . |
| .            | .                  | . | .                  | . | . | Vv10g0057 | . |
| Tc06_g015110 | .                  | . | Gorai.009G165800.1 | . | . | .         | . |
| .            | .                  | . | .                  | . | . | .         | . |
| Vv12g0275    | .                  | . | .                  | . | . | Vv10g0056 | . |
| .            | .                  | . | .                  | . | . | .         | . |
| Tc06_g015120 | .                  | . | Gorai.009G165900.1 | . | . | .         | . |
| .            | .                  | . | .                  | . | . | .         | . |
| Vv12g0276    | .                  | . | .                  | . | . | .         | . |
| .            | .                  | . | .                  | . | . | .         | . |
| Vv12g0277    | .                  | . | .                  | . | . | .         | . |
| .            | .                  | . | .                  | . | . | Vv10g0055 | . |
| Tc06_g015140 | .                  | . | .                  | . | . | .         | . |
| Vv12g0278    | .                  | . | .                  | . | . | .         | . |
| .            | .                  | . | .                  | . | . | .         | . |
| Vv12g0279    | .                  | . | .                  | . | . | .         | . |
| .            | .                  | . | .                  | . | . | .         | . |
| Vv12g0280    | .                  | . | .                  | . | . | .         | . |
| .            | .                  | . | .                  | . | . | .         | . |
| Vv12g0281    | .                  | . | .                  | . | . | .         | . |
| .            | .                  | . | .                  | . | . | .         | . |



|                    |                    |   |                    |                    |   |                    |   |
|--------------------|--------------------|---|--------------------|--------------------|---|--------------------|---|
| .                  | .                  | . | .                  | .                  | . | .                  | . |
| .                  | .                  | . | .                  | .                  | . | .                  | . |
| Vv12g0299          | .                  | . | .                  | .                  | . | .                  | . |
| .                  | .                  | . | .                  | .                  | . | .                  | . |
| Vv12g0300          | .                  | . | .                  | .                  | . | .                  | . |
| .                  | .                  | . | .                  | .                  | . | .                  | . |
| Vv12g0301          | .                  | . | .                  | .                  | . | .                  | . |
| .                  | .                  | . | .                  | .                  | . | .                  | . |
| Vv12g0302          | .                  | . | .                  | .                  | . | .                  | . |
| Vv06g0367          | .                  | . | Gorai.001G130800.1 | .                  | . | .                  | . |
| Gorai.009G078700.1 | .                  | . | Vv10g0047          | Tc06_g015200       | . | .                  | . |
| Gorai.006G088500.1 | .                  | . | Gorai.011G030800.1 | .                  | . | .                  | . |
| Vv12g0303          | .                  | . | .                  | .                  | . | .                  | . |
| .                  | .                  | . | .                  | .                  | . | .                  | . |
| .                  | .                  | . | .                  | .                  | . | .                  | . |
| Vv12g0304          | Tc01_g040750       | . | .                  | .                  | . | .                  | . |
| Vv06g0362          | Tc09_g025680       | . | .                  | Gorai.001G131000.1 | . | .                  | . |
| .                  | Gorai.006G167600.1 | . | .                  | .                  | . | .                  | . |
| .                  | .                  | . | .                  | .                  | . | .                  | . |
| Vv12g0305          | .                  | . | .                  | .                  | . | .                  | . |
| .                  | .                  | . | .                  | .                  | . | .                  | . |
| .                  | .                  | . | .                  | .                  | . | .                  | . |
| Vv12g0306          | .                  | . | .                  | .                  | . | .                  | . |
| .                  | .                  | . | .                  | .                  | . | Vv10g0043          | . |
| Tc06_g015240       | Gorai.006G088400.1 | . | .                  | Gorai.             | . | .                  | . |
| 009G166300.1       | .                  | . | .                  | .                  | . | .                  | . |
| Vv12g0307          | Tc01_g010390       | . | .                  | .                  | . | .                  | . |
| .                  | .                  | . | .                  | .                  | . | .                  | . |
| .                  | .                  | . | .                  | .                  | . | .                  | . |
| Vv12g0308          | .                  | . | .                  | .                  | . | .                  | . |
| .                  | .                  | . | .                  | .                  | . | Vv10g0040          | . |
| Tc06_g015270       | .                  | . | .                  | Gorai.011G030300.1 | . | .                  | . |
| .                  | .                  | . | .                  | .                  | . | .                  | . |
| Vv12g0309          | .                  | . | .                  | .                  | . | .                  | . |
| .                  | .                  | . | .                  | .                  | . | Vv10g0037          | . |
| .                  | .                  | . | .                  | .                  | . | Gorai.010G243500.1 | . |
| Vv12g0310          | .                  | . | .                  | .                  | . | .                  | . |
| .                  | .                  | . | .                  | .                  | . | .                  | . |
| .                  | .                  | . | .                  | .                  | . | .                  | . |
| Vv12g0311          | .                  | . | .                  | .                  | . | .                  | . |
| .                  | .                  | . | .                  | .                  | . | .                  | . |
| .                  | .                  | . | .                  | .                  | . | .                  | . |
| Vv12g0312          | .                  | . | .                  | .                  | . | .                  | . |
| .                  | .                  | . | .                  | .                  | . | .                  | . |
| .                  | .                  | . | .                  | .                  | . | .                  | . |
| Vv12g0313          | .                  | . | .                  | .                  | . | .                  | . |
| .                  | .                  | . | .                  | .                  | . | .                  | . |

|           |                    |   |   |   |                    |           |   |
|-----------|--------------------|---|---|---|--------------------|-----------|---|
| Vv12g0314 | .                  | . | . | . | .                  | .         | . |
| .         | .                  | . | . | . | .                  | .         | . |
| Vv12g0315 | .                  | . | . | . | .                  | .         | . |
| .         | .                  | . | . | . | .                  | .         | . |
| Vv12g0316 | Tc01_g010590       | . | . | . | .                  | .         | . |
| .         | .                  | . | . | . | .                  | .         | . |
| Vv12g0317 | .                  | . | . | . | .                  | .         | . |
| .         | .                  | . | . | . | .                  | .         | . |
| Vv12g0318 | .                  | . | . | . | .                  | .         | . |
| .         | .                  | . | . | . | .                  | .         | . |
| Vv12g0319 | .                  | . | . | . | .                  | .         | . |
| .         | .                  | . | . | . | .                  | .         | . |
| Vv12g0320 | .                  | . | . | . | .                  | .         | . |
| .         | .                  | . | . | . | .                  | .         | . |
| .         | Tc06_g015400       | . | . | . | .                  | Vv10g0028 | . |
| .         | Gorai.010G256800.1 | . | . | . | Gorai.009G167200.1 | .         | . |
| Vv12g0321 | .                  | . | . | . | .                  | .         | . |
| .         | .                  | . | . | . | .                  | .         | . |
| Vv12g0322 | .                  | . | . | . | .                  | .         | . |
| .         | .                  | . | . | . | .                  | .         | . |
| Vv12g0323 | .                  | . | . | . | .                  | .         | . |
| .         | .                  | . | . | . | .                  | .         | . |
| Vv12g0324 | .                  | . | . | . | .                  | .         | . |
| .         | .                  | . | . | . | .                  | .         | . |
| Vv12g0325 | .                  | . | . | . | .                  | .         | . |
| .         | .                  | . | . | . | .                  | .         | . |
| Vv12g0326 | .                  | . | . | . | .                  | .         | . |
| .         | .                  | . | . | . | .                  | .         | . |
| Vv12g0327 | .                  | . | . | . | .                  | .         | . |
| .         | .                  | . | . | . | .                  | .         | . |
| Vv12g0328 | .                  | . | . | . | .                  | .         | . |
| .         | .                  | . | . | . | .                  | .         | . |
| Vv12g0329 | .                  | . | . | . | .                  | .         | . |
| .         | .                  | . | . | . | .                  | .         | . |
| .         | .                  | . | . | . | .                  | .         | . |

|                    |              |              |   |   |   |           |   |
|--------------------|--------------|--------------|---|---|---|-----------|---|
| Vv12g0330          | .            | .            | . | . | . | .         | . |
| .                  | .            | .            | . | . | . | .         | . |
| Vv12g0331          | .            | .            | . | . | . | .         | . |
| .                  | .            | .            | . | . | . | .         | . |
| Vv12g0332          | .            | .            | . | . | . | .         | . |
| .                  | .            | .            | . | . | . | .         | . |
| Vv12g0333          | .            | .            | . | . | . | .         | . |
| .                  | .            | .            | . | . | . | .         | . |
| Vv12g0334          | Tc01_g040660 | .            | . | . | . | .         | . |
| Vv06g0347          | .            | .            | . | . | . | .         | . |
| Gorai.003G141000.1 | .            | .            | . | . | . | .         | . |
| .                  | .            | .            | . | . | . | .         | . |
| Vv12g0335          | Tc01_g000370 | .            | . | . | . | Gorai.    | . |
| 003G001500.1       | .            | .            | . | . | . | .         | . |
| .                  | .            | .            | . | . | . | .         | . |
| Vv12g0336          | .            | .            | . | . | . | .         | . |
| .                  | .            | .            | . | . | . | .         | . |
| Vv12g0337          | .            | .            | . | . | . | .         | . |
| .                  | .            | .            | . | . | . | Vv10g0018 | . |
| .                  | .            | .            | . | . | . | .         | . |
| Vv12g0338          | Tc01_g000650 | .            | . | . | . | Gorai.    | . |
| 003G003200.1       | .            | .            | . | . | . | .         | . |
| .                  | Vv10g0014    | Tc06_g015550 | . | . | . | .         | . |
| Gorai.011G029400.1 | .            | .            | . | . | . | .         | . |
| Vv12g0339          | .            | .            | . | . | . | .         | . |
| .                  | .            | .            | . | . | . | .         | . |
| Vv12g0340          | .            | .            | . | . | . | .         | . |
| .                  | .            | .            | . | . | . | .         | . |
| Vv12g0341          | .            | .            | . | . | . | .         | . |
| .                  | .            | .            | . | . | . | .         | . |
| Vv12g0342          | .            | .            | . | . | . | .         | . |
| .                  | .            | .            | . | . | . | .         | . |
| Vv12g0343          | .            | .            | . | . | . | .         | . |
| .                  | .            | .            | . | . | . | .         | . |
| Vv12g0344          | .            | .            | . | . | . | .         | . |
| .                  | .            | .            | . | . | . | .         | . |
| Vv12g0345          | .            | .            | . | . | . | .         | . |
| .                  | .            | .            | . | . | . | .         | . |
| .                  | .            | .            | . | . | . | .         | . |



|              |                    |                    |   |   |   |           |   |
|--------------|--------------------|--------------------|---|---|---|-----------|---|
| Vv12g0346    | .                  | .                  | . | . | . | .         | . |
| .            | .                  | .                  | . | . | . | .         | . |
| Vv12g0347    | .                  | .                  | . | . | . | .         | . |
| .            | .                  | .                  | . | . | . | .         | . |
| Vv12g0348    | .                  | .                  | . | . | . | .         | . |
| Vv06g0310    | .                  | Gorai.013G252300.1 | . | . | . | .         | . |
|              | Gorai.006G132200.1 | .                  | . | . | . | .         | . |
| .            | .                  | .                  | . | . | . | .         | . |
| Vv12g0349    | Tc01_g027630       | .                  | . | . | . | .         | . |
| .            | .                  | .                  | . | . | . | .         | . |
| Vv12g0350    | .                  | .                  | . | . | . | .         | . |
|              | Tc06_g015660       | Gorai.010G154800.1 | . | . | . | Vv10g0006 | . |
|              | Gorai.010G154800.1 | .                  | . | . | . | .         | . |
| Vv12g0351    | .                  | .                  | . | . | . | .         | . |
| Vv19g0245    | .                  | Gorai.013G169100.1 | . | . | . | Gorai.    | . |
| 002G069300.1 | .                  | .                  | . | . | . | .         | . |
| .            | .                  | .                  | . | . | . | .         | . |
| Vv12g0352    | .                  | .                  | . | . | . | .         | . |
| .            | .                  | .                  | . | . | . | .         | . |
| Vv12g0353    | .                  | .                  | . | . | . | .         | . |
| .            | .                  | .                  | . | . | . | .         | . |
| Vv12g0354    | .                  | .                  | . | . | . | .         | . |
| .            | .                  | .                  | . | . | . | .         | . |
| Vv12g0355    | .                  | .                  | . | . | . | .         | . |
| .            | .                  | .                  | . | . | . | .         | . |
| Vv12g0356    | Tc01_g011040       | .                  | . | . | . | .         | . |
| .            | .                  | .                  | . | . | . | .         | . |
| Vv12g0357    | .                  | .                  | . | . | . | .         | . |
| .            | .                  | .                  | . | . | . | .         | . |
| Vv12g0358    | Tc01_g011390       | .                  | . | . | . | .         | . |
| .            | .                  | .                  | . | . | . | .         | . |
| Vv12g0359    | Tc01_g011770       | .                  | . | . | . | .         | . |
| .            | .                  | .                  | . | . | . | .         | . |
| Vv12g0360    | .                  | .                  | . | . | . | .         | . |
| .            | .                  | .                  | . | . | . | .         | . |
| Vv12g0361    | Tc01_g011790       | .                  | . | . | . | .         | . |
| .            | .                  | .                  | . | . | . | .         | . |

|                    |              |   |   |   |                    |   |   |
|--------------------|--------------|---|---|---|--------------------|---|---|
| Vv12g0362          | .            | . | . | . | .                  | . | . |
| Vv19g0270          | .            | . | . | . | Gorai.002G070000.1 | . | . |
| Gorai.009G388000.1 | .            | . | . | . | .                  | . | . |
| Vv12g0363          | .            | . | . | . | .                  | . | . |
| Vv12g0364          | .            | . | . | . | .                  | . | . |
| Vv12g0365          | .            | . | . | . | .                  | . | . |
| Vv12g0366          | .            | . | . | . | .                  | . | . |
| Vv19g0279          | .            | . | . | . | Gorai.002G070200.1 | . | . |
| Vv12g0367          | .            | . | . | . | .                  | . | . |
| Vv12g0368          | .            | . | . | . | .                  | . | . |
| Vv12g0369          | .            | . | . | . | .                  | . | . |
| Vv12g0370          | .            | . | . | . | .                  | . | . |
| Vv12g0371          | .            | . | . | . | .                  | . | . |
| Vv12g0372          | Tc01_g014820 | . | . | . | .                  | . | . |
| Vv12g0373          | Tc01_g014810 | . | . | . | .                  | . | . |
| Vv12g0374          | .            | . | . | . | .                  | . | . |
| Vv12g0375          | .            | . | . | . | .                  | . | . |
| Vv12g0376          | .            | . | . | . | .                  | . | . |
| Vv12g0377          | .            | . | . | . | .                  | . | . |

|           |              |                    |   |   |   |   |   |
|-----------|--------------|--------------------|---|---|---|---|---|
| Vv12g0378 | .            | .                  | . | . | . | . | . |
| .         | .            | .                  | . | . | . | . | . |
| Vv12g0379 | .            | .                  | . | . | . | . | . |
| .         | .            | .                  | . | . | . | . | . |
| Vv12g0380 | .            | .                  | . | . | . | . | . |
| .         | .            | .                  | . | . | . | . | . |
| Vv12g0381 | .            | .                  | . | . | . | . | . |
| .         | .            | .                  | . | . | . | . | . |
| Vv12g0382 | .            | .                  | . | . | . | . | . |
| .         | .            | .                  | . | . | . | . | . |
| Vv12g0383 | .            | .                  | . | . | . | . | . |
| .         | .            | .                  | . | . | . | . | . |
| Vv12g0384 | .            | .                  | . | . | . | . | . |
| Vv19g0299 | .            | Gorai.013G168000.1 | . | . | . | . | . |
| .         | .            | .                  | . | . | . | . | . |
| Vv12g0385 | .            | .                  | . | . | . | . | . |
| .         | .            | .                  | . | . | . | . | . |
| Vv12g0386 | Tc01_g027480 | .                  | . | . | . | . | . |
| .         | .            | .                  | . | . | . | . | . |
| Vv12g0387 | Tc01_g027240 | .                  | . | . | . | . | . |
| .         | .            | .                  | . | . | . | . | . |
| Vv12g0388 | .            | .                  | . | . | . | . | . |
| .         | .            | .                  | . | . | . | . | . |
| Vv12g0389 | .            | .                  | . | . | . | . | . |
| .         | .            | .                  | . | . | . | . | . |
| Vv12g0390 | .            | .                  | . | . | . | . | . |
| .         | .            | .                  | . | . | . | . | . |
| Vv12g0391 | .            | .                  | . | . | . | . | . |
| .         | .            | .                  | . | . | . | . | . |
| Vv12g0392 | .            | .                  | . | . | . | . | . |
| .         | .            | .                  | . | . | . | . | . |
| Vv12g0393 | Tc01_g011840 | .                  | . | . | . | . | . |
| .         | .            | .                  | . | . | . | . | . |
| Vv12g0394 | Tc01_g011850 | .                  | . | . | . | . | . |
| .         | .            | .                  | . | . | . | . | . |

|                    |                    |           |   |                    |                    |   |
|--------------------|--------------------|-----------|---|--------------------|--------------------|---|
| Vv12g0395          | Tc01_g011860       | .         | . | .                  | .                  | . |
| .                  | .                  | .         | . | .                  | .                  | . |
| Vv12g0396          | Tc01_g011890       | .         | . | .                  | .                  | . |
| .                  | .                  | .         | . | .                  | .                  | . |
| Vv12g0397          | .                  | .         | . | .                  | .                  | . |
| .                  | .                  | .         | . | .                  | .                  | . |
| Vv12g0398          | .                  | .         | . | .                  | .                  | . |
| .                  | .                  | .         | . | .                  | .                  | . |
| Vv12g0399          | .                  | .         | . | .                  | .                  | . |
| .                  | .                  | .         | . | .                  | .                  | . |
| Vv12g0400          | .                  | .         | . | .                  | .                  | . |
| .                  | .                  | .         | . | .                  | .                  | . |
| Vv12g0401          | .                  | .         | . | .                  | .                  | . |
| .                  | .                  | .         | . | .                  | .                  | . |
| Vv12g0402          | .                  | .         | . | .                  | .                  | . |
| .                  | .                  | .         | . | .                  | .                  | . |
| Vv12g0403          | .                  | .         | . | .                  | .                  | . |
| .                  | .                  | .         | . | .                  | .                  | . |
| Vv12g0404          | .                  | .         | . | .                  | .                  | . |
| .                  | .                  | .         | . | .                  | .                  | . |
| Vv12g0405          | .                  | .         | . | .                  | .                  | . |
| .                  | .                  | .         | . | .                  | .                  | . |
| Vv12g0406          | .                  | .         | . | .                  | Gorai.004G028700.1 | . |
| .                  | Vv19g0477          | .         | . | Gorai.013G165400.1 | .                  | . |
| .                  | Gorai.002G078700.1 | .         | . | .                  | .                  | . |
| .                  | .                  | .         | . | .                  | .                  | . |
| Vv12g0407          | Tc01_g030220       | .         | . | .                  | Gorai.             | . |
| 004G029600.1       | .                  | Vv19g0482 | . | .                  | .                  | . |
| Gorai.002G079500.1 | .                  | .         | . | .                  | .                  | . |
| .                  | .                  | .         | . | .                  | .                  | . |
| Vv12g0408          | .                  | .         | . | .                  | .                  | . |
| .                  | .                  | .         | . | .                  | .                  | . |
| Vv12g0409          | .                  | .         | . | .                  | .                  | . |
| .                  | .                  | .         | . | .                  | .                  | . |
| Vv12g0410          | .                  | .         | . | .                  | .                  | . |
| .                  | .                  | .         | . | .                  | .                  | . |

|              |              |   |   |   |   |        |   |
|--------------|--------------|---|---|---|---|--------|---|
| Vv12g0411    | .            | . | . | . | . | .      | . |
| .            | .            | . | . | . | . | .      | . |
| Vv12g0412    | Tc01_g026880 | . | . | . | . | Gorai. | . |
| 004G031100.1 | .            | . | . | . | . | .      | . |
| .            | .            | . | . | . | . | .      | . |
| Vv12g0413    | .            | . | . | . | . | .      | . |
| .            | .            | . | . | . | . | .      | . |
| Vv12g0414    | .            | . | . | . | . | .      | . |
| .            | .            | . | . | . | . | .      | . |
| Vv12g0415    | .            | . | . | . | . | .      | . |
| .            | .            | . | . | . | . | .      | . |
| Vv12g0416    | .            | . | . | . | . | .      | . |
| .            | .            | . | . | . | . | .      | . |
| Vv12g0417    | .            | . | . | . | . | .      | . |
| .            | .            | . | . | . | . | .      | . |
| Vv12g0418    | .            | . | . | . | . | .      | . |
| .            | .            | . | . | . | . | .      | . |
| Vv12g0419    | .            | . | . | . | . | .      | . |
| .            | .            | . | . | . | . | .      | . |
| Vv12g0420    | .            | . | . | . | . | .      | . |
| .            | .            | . | . | . | . | .      | . |
| Vv12g0421    | .            | . | . | . | . | .      | . |
| .            | .            | . | . | . | . | .      | . |
| Vv12g0422    | .            | . | . | . | . | .      | . |
| .            | .            | . | . | . | . | .      | . |
| Vv12g0423    | .            | . | . | . | . | .      | . |
| .            | .            | . | . | . | . | .      | . |
| Vv12g0424    | .            | . | . | . | . | .      | . |
| .            | .            | . | . | . | . | .      | . |
| Vv12g0425    | .            | . | . | . | . | .      | . |
| .            | .            | . | . | . | . | .      | . |
| Vv12g0426    | .            | . | . | . | . | .      | . |
| Vv19g0488    | .            | . | . | . | . | .      | . |
| .            | .            | . | . | . | . | .      | . |
| Vv12g0427    | .            | . | . | . | . | .      | . |

|           |              |   |   |   |   |   |   |
|-----------|--------------|---|---|---|---|---|---|
| .         | .            | . | . | . | . | . | . |
| .         | .            | . | . | . | . | . | . |
| Vv12g0428 | .            | . | . | . | . | . | . |
| .         | .            | . | . | . | . | . | . |
| Vv12g0429 | .            | . | . | . | . | . | . |
| .         | .            | . | . | . | . | . | . |
| Vv12g0430 | .            | . | . | . | . | . | . |
| .         | .            | . | . | . | . | . | . |
| Vv12g0431 | .            | . | . | . | . | . | . |
| .         | .            | . | . | . | . | . | . |
| Vv12g0432 | .            | . | . | . | . | . | . |
| .         | .            | . | . | . | . | . | . |
| Vv12g0433 | .            | . | . | . | . | . | . |
| .         | .            | . | . | . | . | . | . |
| Vv12g0434 | Tc01_g029790 | . | . | . | . | . | . |
| .         | .            | . | . | . | . | . | . |
| Vv12g0435 | .            | . | . | . | . | . | . |
| Vv19g0510 | .            | . | . | . | . | . | . |
| .         | .            | . | . | . | . | . | . |
| Vv12g0436 | .            | . | . | . | . | . | . |
| .         | .            | . | . | . | . | . | . |
| Vv12g0437 | .            | . | . | . | . | . | . |
| .         | .            | . | . | . | . | . | . |
| Vv12g0438 | .            | . | . | . | . | . | . |
| Vv19g0515 | .            | . | . | . | . | . | . |
| .         | .            | . | . | . | . | . | . |
| Vv12g0439 | .            | . | . | . | . | . | . |
| .         | .            | . | . | . | . | . | . |
| Vv12g0440 | .            | . | . | . | . | . | . |
| .         | .            | . | . | . | . | . | . |
| Vv12g0441 | .            | . | . | . | . | . | . |
| .         | .            | . | . | . | . | . | . |
| Vv12g0442 | Tc01_g026460 | . | . | . | . | . | . |
| .         | .            | . | . | . | . | . | . |
| Vv12g0443 | .            | . | . | . | . | . | . |
| .         | .            | . | . | . | . | . | . |
| .         | .            | . | . | . | . | . | . |

|              |                    |   |                    |   |                    |   |
|--------------|--------------------|---|--------------------|---|--------------------|---|
| Vv12g0444    | .                  | . | .                  | . | .                  | . |
| Vv19g0517    | Tc07_g005200       |   | Gorai.013G164400.1 |   | .                  | . |
| .            | .                  | . | .                  | . | .                  | . |
| .            | .                  | . | .                  | . | .                  | . |
| Vv12g0445    | .                  | . | .                  | . | .                  | . |
| .            | .                  | . | .                  | . | .                  | . |
| .            | .                  | . | .                  | . | .                  | . |
| Vv12g0446    | .                  | . | .                  | . | Gorai.004G033500.1 | . |
| .            | .                  | . | .                  | . | .                  | . |
| .            | .                  | . | .                  | . | .                  | . |
| Vv12g0447    | .                  | . | .                  | . | .                  | . |
| .            | .                  | . | .                  | . | .                  | . |
| .            | .                  | . | .                  | . | .                  | . |
| Vv12g0448    | .                  | . | .                  | . | .                  | . |
| .            | .                  | . | .                  | . | .                  | . |
| .            | .                  | . | .                  | . | .                  | . |
| Vv12g0449    | .                  | . | .                  | . | .                  | . |
| Vv19g0522    | Tc07_g005150       |   | Gorai.013G164100.1 |   | Gorai.             | . |
| 007G314800.1 | Gorai.002G081900.1 |   | .                  | . | .                  | . |
| .            | .                  | . | .                  | . | .                  | . |
| Vv12g0450    | Tc01_g039350       |   | .                  | . | .                  | . |
| .            | .                  | . | .                  | . | .                  | . |
| .            | .                  | . | .                  | . | .                  | . |
| Vv12g0451    | Tc01_g025940       |   | .                  | . | .                  | . |
| .            | .                  | . | .                  | . | .                  | . |
| .            | .                  | . | .                  | . | .                  | . |
| Vv12g0452    | .                  | . | .                  | . | .                  | . |
| .            | .                  | . | .                  | . | .                  | . |
| .            | .                  | . | .                  | . | .                  | . |
| Vv12g0453    | .                  | . | .                  | . | .                  | . |
| .            | .                  | . | .                  | . | .                  | . |
| .            | .                  | . | .                  | . | .                  | . |
| Vv12g0454    | .                  | . | .                  | . | .                  | . |
| .            | .                  | . | .                  | . | .                  | . |
| .            | .                  | . | .                  | . | .                  | . |
| Vv12g0455    | .                  | . | .                  | . | .                  | . |
| .            | .                  | . | .                  | . | .                  | . |
| .            | .                  | . | .                  | . | .                  | . |
| Vv12g0456    | .                  | . | .                  | . | .                  | . |
| .            | .                  | . | .                  | . | .                  | . |
| .            | .                  | . | .                  | . | .                  | . |
| Vv12g0457    | .                  | . | .                  | . | .                  | . |
| .            | .                  | . | .                  | . | .                  | . |
| .            | .                  | . | .                  | . | .                  | . |
| Vv12g0458    | .                  | . | .                  | . | .                  | . |
| .            | .                  | . | .                  | . | .                  | . |
| .            | .                  | . | .                  | . | .                  | . |
| Vv12g0459    | .                  | . | .                  | . | Gorai.             | . |
| 001G105800.1 | .                  | . | .                  | . | .                  | . |
| .            | .                  | . | .                  | . | .                  | . |

|              |              |   |                    |        |   |
|--------------|--------------|---|--------------------|--------|---|
| Vv12g0460    | Tc01_g029690 | . | .                  | .      | . |
|              | Vv19g0524    | . | .                  | .      | . |
| Vv12g0461    | .            | . | .                  | .      | . |
| Vv12g0462    | Tc01_g036940 | . | Gorai.008G116200.1 | .      | . |
| Vv12g0463    | Tc01_g039540 | . | .                  | .      | . |
| Vv12g0464    | .            | . | .                  | .      | . |
| Vv12g0465    | .            | . | .                  | .      | . |
| Vv12g0466    | .            | . | .                  | .      | . |
| Vv12g0467    | .            | . | .                  | .      | . |
| Vv12g0468    | .            | . | .                  | .      | . |
| Vv12g0469    | .            | . | .                  | Gorai. | . |
| 001G104700.1 | Vv08g0055    | . | .                  | .      | . |
| Vv12g0470    | .            | . | .                  | .      | . |
| Vv12g0471    | .            | . | .                  | .      | . |
| Vv12g0472    | .            | . | .                  | .      | . |
| Vv12g0473    | .            | . | .                  | .      | . |
| Vv12g0474    | Tc01_g004590 | . | Gorai.008G073800.1 | .      | . |
| Vv12g0475    | .            | . | .                  | .      | . |
| Vv12g0476    | Tc01_g029350 | . | .                  | .      | . |



|           |              |   |                    |   |   |   |   |
|-----------|--------------|---|--------------------|---|---|---|---|
| Vv12g0477 | .            | . | .                  | . | . | . | . |
| .         | .            | . | .                  | . | . | . | . |
| Vv12g0478 | .            | . | .                  | . | . | . | . |
| .         | .            | . | .                  | . | . | . | . |
| Vv12g0479 | .            | . | .                  | . | . | . | . |
| .         | .            | . | .                  | . | . | . | . |
| Vv12g0480 | .            | . | .                  | . | . | . | . |
| .         | .            | . | .                  | . | . | . | . |
| Vv12g0481 | .            | . | .                  | . | . | . | . |
| .         | .            | . | .                  | . | . | . | . |
| Vv12g0482 | Tc01_g029340 | . | .                  | . | . | . | . |
| .         | .            | . | .                  | . | . | . | . |
| Vv12g0483 | .            | . | .                  | . | . | . | . |
| .         | .            | . | .                  | . | . | . | . |
| Vv12g0484 | .            | . | .                  | . | . | . | . |
| .         | .            | . | .                  | . | . | . | . |
| Vv12g0485 | .            | . | .                  | . | . | . | . |
| .         | .            | . | .                  | . | . | . | . |
| Vv12g0486 | .            | . | .                  | . | . | . | . |
| .         | .            | . | .                  | . | . | . | . |
| Vv12g0487 | .            | . | .                  | . | . | . | . |
| .         | .            | . | .                  | . | . | . | . |
| Vv12g0488 | .            | . | .                  | . | . | . | . |
| .         | .            | . | .                  | . | . | . | . |
| Vv12g0489 | Tc01_g036690 | . | Gorai.008G117200.1 | . | . | . | . |
| .         | .            | . | .                  | . | . | . | . |
| Vv12g0490 | .            | . | .                  | . | . | . | . |
| .         | .            | . | .                  | . | . | . | . |
| Vv12g0491 | .            | . | .                  | . | . | . | . |
| .         | .            | . | .                  | . | . | . | . |
| Vv12g0492 | Tc01_g039780 | . | .                  | . | . | . | . |
| .         | .            | . | .                  | . | . | . | . |
| Vv12g0493 | Tc01_g004990 | . | .                  | . | . | . | . |

|                    |                    |                    |   |   |        |   |
|--------------------|--------------------|--------------------|---|---|--------|---|
| Gorai.001G101700.1 | .                  | .                  | . | . | .      | . |
| .                  | .                  | .                  | . | . | .      | . |
| Vv12g0494          | Tc01_g005000       | .                  | . | . | .      | . |
| Gorai.001G101500.1 | .                  | .                  | . | . | .      | . |
| .                  | .                  | .                  | . | . | .      | . |
| Vv12g0495          | .                  | .                  | . | . | .      | . |
| .                  | .                  | .                  | . | . | .      | . |
| .                  | .                  | .                  | . | . | .      | . |
| Vv12g0496          | .                  | .                  | . | . | .      | . |
| .                  | .                  | .                  | . | . | .      | . |
| .                  | .                  | .                  | . | . | .      | . |
| Vv12g0497          | .                  | .                  | . | . | .      | . |
| Vv08g0088          | Tc05_g023210       | .                  | . | . | .      | . |
| .                  | .                  | .                  | . | . | .      | . |
| Vv12g0498          | .                  | .                  | . | . | Gorai. | . |
| 001G098600.1       | Vv08g0096          | .                  | . | . | .      | . |
| .                  | .                  | .                  | . | . | .      | . |
| Vv12g0499          | .                  | .                  | . | . | .      | . |
| Vv08g0103          | .                  | .                  | . | . | .      | . |
| .                  | .                  | .                  | . | . | .      | . |
| Vv12g0500          | .                  | .                  | . | . | .      | . |
| .                  | .                  | .                  | . | . | .      | . |
| .                  | .                  | .                  | . | . | .      | . |
| Vv12g0501          | .                  | .                  | . | . | .      | . |
| Vv08g0104          | .                  | .                  | . | . | .      | . |
| .                  | .                  | .                  | . | . | .      | . |
| Vv12g0502          | .                  | .                  | . | . | .      | . |
| .                  | .                  | .                  | . | . | .      | . |
| .                  | .                  | .                  | . | . | .      | . |
| Vv12g0503          | .                  | .                  | . | . | .      | . |
| Vv08g0106          | .                  | .                  | . | . | .      | . |
| .                  | .                  | .                  | . | . | .      | . |
| Vv12g0504          | .                  | .                  | . | . | .      | . |
| .                  | .                  | .                  | . | . | .      | . |
| .                  | .                  | .                  | . | . | .      | . |
| Vv12g0505          | Gorai.007G167700.1 | Gorai.001G219600.1 | . | . | .      | . |
| .                  | .                  | .                  | . | . | .      | . |
| .                  | .                  | .                  | . | . | .      | . |
| .                  | .                  | .                  | . | . | .      | . |
| Vv12g0506          | Tc01_g031210       | .                  | . | . | .      | . |
| .                  | .                  | .                  | . | . | .      | . |
| .                  | .                  | .                  | . | . | .      | . |
| Vv12g0507          | .                  | .                  | . | . | .      | . |
| .                  | .                  | .                  | . | . | .      | . |
| .                  | .                  | .                  | . | . | .      | . |
| Vv12g0508          | Tc01_g018680       | .                  | . | . | .      | . |
| .                  | .                  | .                  | . | . | .      | . |
| .                  | .                  | .                  | . | . | .      | . |
| Vv12g0509          | .                  | .                  | . | . | .      | . |
| .                  | .                  | .                  | . | . | .      | . |

|           |              |   |   |   |   |   |
|-----------|--------------|---|---|---|---|---|
| Vv12g0510 | Tc01_g031170 | . | . | . | . | . |
| .         | .            | . | . | . | . | . |
| Vv12g0511 | .            | . | . | . | . | . |
| .         | .            | . | . | . | . | . |
| Vv12g0512 | .            | . | . | . | . | . |
| .         | .            | . | . | . | . | . |
| Vv12g0513 | .            | . | . | . | . | . |
| .         | .            | . | . | . | . | . |
| Vv12g0514 | .            | . | . | . | . | . |
| .         | .            | . | . | . | . | . |
| Vv12g0515 | .            | . | . | . | . | . |
| Vv08g0143 | Tc05_g004750 | . | . | . | . | . |
| .         | .            | . | . | . | . | . |
| Vv12g0516 | .            | . | . | . | . | . |
| .         | .            | . | . | . | . | . |
| Vv12g0517 | .            | . | . | . | . | . |
| .         | .            | . | . | . | . | . |
| Vv12g0518 | .            | . | . | . | . | . |
| .         | .            | . | . | . | . | . |
| Vv12g0519 | .            | . | . | . | . | . |
| .         | .            | . | . | . | . | . |
| Vv12g0520 | Tc01_g039880 | . | . | . | . | . |
| .         | .            | . | . | . | . | . |
| Vv12g0521 | .            | . | . | . | . | . |
| .         | .            | . | . | . | . | . |
| Vv12g0522 | .            | . | . | . | . | . |
| .         | .            | . | . | . | . | . |
| Vv12g0523 | .            | . | . | . | . | . |
| .         | .            | . | . | . | . | . |
| Vv12g0524 | .            | . | . | . | . | . |
| .         | .            | . | . | . | . | . |
| Vv12g0525 | .            | . | . | . | . | . |
| .         | .            | . | . | . | . | . |
| Vv12g0526 | .            | . | . | . | . | . |

|           |              |  |  |  |  |  |  |
|-----------|--------------|--|--|--|--|--|--|
| Vv12g0527 |              |  |  |  |  |  |  |
| Vv12g0528 | Tc01_g018550 |  |  |  |  |  |  |
| Vv12g0529 |              |  |  |  |  |  |  |
| Vv12g0530 |              |  |  |  |  |  |  |
| Vv12g0531 |              |  |  |  |  |  |  |
| Vv12g0532 | Tc01_g031140 |  |  |  |  |  |  |
| Vv12g0533 |              |  |  |  |  |  |  |
| Vv12g0534 |              |  |  |  |  |  |  |
| Vv12g0535 |              |  |  |  |  |  |  |
| Vv12g0536 |              |  |  |  |  |  |  |
| Vv12g0537 |              |  |  |  |  |  |  |
| Vv12g0538 |              |  |  |  |  |  |  |
| Vv12g0539 |              |  |  |  |  |  |  |
| Vv12g0540 |              |  |  |  |  |  |  |
| Vv12g0541 |              |  |  |  |  |  |  |
| Vv12g0542 |              |  |  |  |  |  |  |

|                    |                    |                    |                    |   |   |        |   |
|--------------------|--------------------|--------------------|--------------------|---|---|--------|---|
| Vv12g0543          | .                  | .                  | .                  | . | . | .      | . |
| .                  | .                  | .                  | .                  | . | . | .      | . |
| Vv12g0544          | .                  | Gorai.007G169000.1 | .                  | . | . | .      | . |
| .                  | .                  | .                  | .                  | . | . | .      | . |
| Vv12g0545          | .                  | Gorai.007G169100.1 | .                  | . | . | .      | . |
| .                  | Vv19g0704          | Tc07_g002460       | Gorai.013G157300.1 | . | . | .      | . |
| .                  | Gorai.007G169100.1 | .                  | .                  | . | . | .      | . |
| Vv12g0546          | .                  | .                  | .                  | . | . | Gorai. | . |
| 001G097300.1       | .                  | .                  | .                  | . | . | .      | . |
| Vv12g0547          | Tc01_g018300       | Gorai.007G169200.1 | .                  | . | . | .      | . |
| .                  | .                  | .                  | .                  | . | . | .      | . |
| Vv12g0548          | Tc01_g018010       | Gorai.007G169300.1 | Gorai.             | . | . | .      | . |
| 001G218300.1       | .                  | Gorai.001G097000.1 | .                  | . | . | .      | . |
| .                  | .                  | .                  | .                  | . | . | .      | . |
| Vv12g0549          | .                  | .                  | .                  | . | . | .      | . |
| .                  | .                  | .                  | .                  | . | . | .      | . |
| Vv12g0550          | Tc01_g018000       | Gorai.001G218200.1 | .                  | . | . | .      | . |
| .                  | .                  | .                  | .                  | . | . | .      | . |
| Vv12g0551          | Tc01_g017990       | .                  | .                  | . | . | .      | . |
| Vv19g0692          | .                  | .                  | .                  | . | . | .      | . |
| Vv12g0552          | Tc01_g017980       | Gorai.001G218100.1 | .                  | . | . | .      | . |
| .                  | .                  | .                  | .                  | . | . | .      | . |
| Vv12g0553          | Tc01_g017960       | Gorai.007G169400.1 | Gorai.             | . | . | .      | . |
| 001G218000.1       | .                  | .                  | .                  | . | . | .      | . |
| .                  | .                  | .                  | .                  | . | . | .      | . |
| Vv12g0554          | .                  | .                  | .                  | . | . | .      | . |
| .                  | .                  | .                  | .                  | . | . | .      | . |
| Vv12g0555          | Tc01_g017870       | Gorai.001G217800.1 | .                  | . | . | .      | . |
| .                  | .                  | .                  | .                  | . | . | .      | . |
| Vv12g0556          | Tc01_g017860       | Gorai.007G169500.1 | .                  | . | . | .      | . |
| .                  | .                  | .                  | .                  | . | . | .      | . |
| Vv12g0557          | Tc01_g017850       | Gorai.001G195000.1 | .                  | . | . | .      | . |
| .                  | .                  | .                  | .                  | . | . | .      | . |
| Vv12g0558          | Tc01_g017830       | Gorai.007G169700.1 | .                  | . | . | .      | . |
| Gorai.001G195100.1 | .                  | .                  | .                  | . | . | .      | . |

|                    |                    |                    |                    |
|--------------------|--------------------|--------------------|--------------------|
| Vv12g0559          |                    | Gorai.001G217700.1 | Gorai.             |
| 001G195200.1       |                    |                    |                    |
| Vv12g0560          |                    |                    |                    |
| Vv12g0561          |                    |                    |                    |
| Vv12g0562          |                    |                    |                    |
| Vv12g0563          | Tc01_g017800       | Gorai.007G169900.1 |                    |
| Gorai.001G195400.1 |                    |                    |                    |
| Vv12g0564          |                    |                    |                    |
| Vv12g0565          |                    |                    |                    |
| Vv12g0566          | Tc01_g017790       |                    |                    |
| Vv12g0567          | Tc01_g017780       |                    | Gorai.001G195500.1 |
| Vv12g0568          | Tc01_g030980       |                    |                    |
| Vv12g0569          | Tc01_g017770       |                    | Gorai.001G195600.1 |
|                    | Gorai.001G096900.1 |                    |                    |
| Vv12g0570          | Tc01_g017760       |                    |                    |
| Vv12g0571          |                    | Gorai.001G195700.1 |                    |
| Vv12g0572          | Tc01_g017730       | Gorai.007G170000.1 |                    |
| Vv12g0573          |                    |                    |                    |

|                    |              |                    |                    |        |   |
|--------------------|--------------|--------------------|--------------------|--------|---|
| Vv12g0574          | Tc01_g017720 | .                  | Gorai.001G217500.1 | .      | . |
| Gorai.001G195900.1 | .            | .                  | Gorai.001G096500.1 | .      | . |
| .                  | .            | .                  | .                  | .      | . |
| .                  | .            | .                  | .                  | .      | . |
| Vv12g0575          | Tc01_g017710 | .                  | Gorai.007G170100.1 | Gorai. | . |
| 001G217400.1       | .            | .                  | Gorai.001G096400.1 | .      | . |
| .                  | .            | .                  | .                  | .      | . |
| .                  | .            | .                  | .                  | .      | . |
| Vv12g0576          | Tc01_g017690 | .                  | Gorai.007G170200.1 | .      | . |
| .                  | .            | .                  | .                  | .      | . |
| .                  | .            | .                  | .                  | .      | . |
| Vv12g0577          | Tc01_g017680 | .                  | .                  | .      | . |
| .                  | .            | .                  | .                  | .      | . |
| .                  | .            | .                  | .                  | .      | . |
| Vv12g0578          | .            | .                  | .                  | .      | . |
| .                  | .            | .                  | .                  | .      | . |
| .                  | .            | .                  | .                  | .      | . |
| Vv12g0579          | Tc01_g017670 | .                  | Gorai.007G170300.1 | Gorai. | . |
| 001G217000.1       | .            | .                  | .                  | .      | . |
| .                  | .            | .                  | .                  | .      | . |
| .                  | .            | .                  | .                  | .      | . |
| Vv12g0580          | Tc01_g017660 | .                  | Gorai.007G170400.1 | .      | . |
| .                  | .            | .                  | .                  | .      | . |
| .                  | .            | .                  | .                  | .      | . |
| Vv12g0581          | Tc01_g017650 | .                  | Gorai.001G216900.1 | .      | . |
| .                  | Vv19g0685    | .                  | Tc07_g002650       | .      | . |
| Gorai.002G092600.1 | .            | Gorai.009G442700.1 | .                  | .      | . |
| .                  | .            | .                  | .                  | .      | . |
| Vv12g0582          | Tc01_g017640 | .                  | Gorai.001G216800.1 | .      | . |
| .                  | .            | .                  | .                  | .      | . |
| .                  | .            | .                  | .                  | .      | . |
| Vv12g0583          | Tc01_g017630 | .                  | Gorai.001G196200.1 | .      | . |
| .                  | .            | .                  | .                  | .      | . |
| .                  | .            | .                  | .                  | .      | . |
| Vv12g0584          | Tc01_g017600 | .                  | Gorai.001G216700.1 | .      | . |
| .                  | .            | .                  | .                  | .      | . |
| .                  | .            | .                  | .                  | .      | . |
| Vv12g0585          | .            | .                  | .                  | .      | . |
| .                  | .            | .                  | .                  | .      | . |
| .                  | .            | .                  | .                  | .      | . |
| Vv12g0586          | Tc01_g017590 | .                  | Gorai.007G170500.1 | .      | . |
| .                  | .            | .                  | .                  | .      | . |
| .                  | .            | .                  | .                  | .      | . |
| Vv12g0587          | .            | .                  | Gorai.001G216600.1 | .      | . |
| .                  | .            | .                  | .                  | .      | . |
| .                  | .            | .                  | .                  | .      | . |
| Vv12g0588          | Tc01_g003440 | .                  | .                  | .      | . |
| .                  | .            | .                  | .                  | .      | . |
| .                  | .            | .                  | .                  | .      | . |
| Vv12g0589          | Tc01_g030880 | .                  | Gorai.007G170600.1 | .      | . |

|              |                    |                    |
|--------------|--------------------|--------------------|
| .            | Gorai.001G095700.1 | Vv19g0683          |
| Tc07_g002680 | Gorai.007G170600.1 | Gorai.002G092400.1 |
| .            | .                  | .                  |
| Vv12g0590    | .                  | .                  |
| .            | .                  | .                  |
| Vv12g0591    | .                  | .                  |
| .            | .                  | .                  |
| Vv12g0592    | Gorai.007G170900.1 | .                  |
| .            | .                  | .                  |
| Vv12g0593    | .                  | .                  |
| .            | .                  | .                  |
| Vv12g0594    | Tc01_g003360       | .                  |
| .            | .                  | .                  |
| Vv12g0595    | .                  | .                  |
| .            | .                  | .                  |
| Vv12g0596    | .                  | .                  |
| .            | .                  | .                  |
| Vv12g0597    | .                  | .                  |
| .            | .                  | .                  |
| Vv12g0598    | .                  | .                  |
| .            | .                  | .                  |
| Vv12g0599    | Gorai.007G171000.1 | Gorai.001G216400.1 |
| .            | .                  | .                  |
| .            | .                  | .                  |
| Vv12g0600    | Gorai.001G216300.1 | .                  |
| .            | .                  | .                  |
| Vv12g0601    | Gorai.001G216200.1 | .                  |
| .            | .                  | .                  |
| Vv12g0602    | Gorai.007G171100.1 | .                  |
| .            | .                  | .                  |
| Vv12g0603    | .                  | .                  |
| .            | .                  | .                  |
| Vv12g0604    | Gorai.007G171400.1 | Gorai.001G215700.1 |
| .            | .                  | .                  |
| .            | .                  | .                  |



|              |              |                    |                    |                    |   |
|--------------|--------------|--------------------|--------------------|--------------------|---|
| Vv12g0605    | .            | .                  | Gorai.001G215600.1 | .                  | . |
| .            | .            | .                  | .                  | .                  | . |
| Vv12g0606    | .            | .                  | Gorai.007G171500.1 | Gorai.001G215500.1 | . |
| .            | .            | .                  | .                  | .                  | . |
| .            | .            | .                  | Vv010rg0095        | .                  | . |
| .            | .            | .                  | .                  | .                  | . |
| Vv12g0607    | .            | .                  | Gorai.001G197700.1 | .                  | . |
| .            | Vv19g0678    | Tc07_g002770       | Gorai.013G158700.1 | .                  | . |
| .            | .            | .                  | .                  | .                  | . |
| .            | .            | .                  | .                  | .                  | . |
| Vv12g0608    | .            | .                  | .                  | Gorai.             | . |
| 001G094600.1 | Vv19g0677    | Tc07_g002780       | .                  | .                  | . |
| .            | .            | .                  | .                  | .                  | . |
| .            | .            | .                  | .                  | .                  | . |
| Vv12g0609    | Tc01_g003310 | Gorai.007G171600.1 | .                  | .                  | . |
| .            | .            | .                  | .                  | .                  | . |
| .            | .            | .                  | .                  | .                  | . |
| Vv12g0610    | .            | .                  | .                  | .                  | . |
| .            | .            | .                  | .                  | .                  | . |
| .            | .            | .                  | .                  | .                  | . |
| Vv12g0611    | .            | .                  | .                  | .                  | . |
| .            | .            | .                  | .                  | .                  | . |
| .            | .            | .                  | .                  | .                  | . |
| Vv12g0612    | .            | .                  | .                  | Gorai.             | . |
| 001G094400.1 | .            | .                  | .                  | .                  | . |
| .            | .            | .                  | .                  | .                  | . |
| Vv12g0613    | .            | .                  | Gorai.001G215000.1 | .                  | . |
| .            | Vv19g0674    | .                  | .                  | .                  | . |
| .            | .            | .                  | .                  | .                  | . |
| Vv12g0614    | .            | .                  | .                  | .                  | . |
| .            | .            | .                  | .                  | .                  | . |
| .            | .            | .                  | .                  | .                  | . |
| Vv12g0615    | .            | .                  | .                  | .                  | . |
| .            | .            | .                  | .                  | .                  | . |
| .            | .            | .                  | .                  | .                  | . |
| Vv12g0616    | .            | .                  | .                  | .                  | . |
| .            | .            | .                  | .                  | .                  | . |
| .            | .            | .                  | .                  | .                  | . |
| Vv12g0617    | .            | .                  | .                  | .                  | . |
| .            | .            | .                  | .                  | .                  | . |
| .            | .            | .                  | .                  | .                  | . |
| Vv12g0618    | Tc01_g025770 | .                  | .                  | .                  | . |
| .            | .            | .                  | .                  | .                  | . |
| .            | .            | .                  | .                  | .                  | . |
| Vv12g0619    | .            | .                  | .                  | .                  | . |
| .            | .            | .                  | .                  | .                  | . |
| .            | .            | .                  | .                  | .                  | . |
| Vv12g0620    | .            | .                  | .                  | .                  | . |

|              |              |                    |   |                    |             |   |
|--------------|--------------|--------------------|---|--------------------|-------------|---|
| .            | .            | .                  | . | .                  | .           | . |
| .            | .            | .                  | . | .                  | .           | . |
| Vv12g0621    | Tc01_g017560 | .                  | . | .                  | .           | . |
| .            | .            | .                  | . | .                  | .           | . |
| Vv12g0622    | Tc01_g017540 | .                  | . | .                  | .           | . |
| .            | .            | .                  | . | .                  | .           | . |
| Vv12g0623    | .            | .                  | . | .                  | .           | . |
| .            | .            | .                  | . | .                  | .           | . |
| Vv12g0624    | Tc01_g017530 | .                  | . | .                  | .           | . |
| .            | .            | .                  | . | .                  | .           | . |
| Vv12g0625    | Tc01_g003020 | .                  | . | .                  | .           | . |
| .            | .            | .                  | . | .                  | .           | . |
| Vv12g0626    | Tc01_g017490 | Gorai.007G171800.1 | . | .                  | .           | . |
| .            | .            | .                  | . | .                  | .           | . |
| Vv12g0627    | Tc01_g002880 | .                  | . | .                  | .           | . |
| .            | .            | .                  | . | .                  | .           | . |
| Vv12g0628    | Tc01_g017460 | .                  | . | Gorai.001G197600.1 | .           | . |
| .            | .            | .                  | . | .                  | .           | . |
| Vv12g0629    | Tc01_g017430 | Gorai.007G171900.1 | . | .                  | Gorai.      | . |
| 001G213700.1 | .            | Gorai.001G094300.1 | . | .                  | Vv19g0667   | . |
| Tc07_g002910 | .            | Gorai.007G171900.1 | . | .                  | Gorai.      | . |
| 002G091300.1 | .            | Vv010rg0082        | . | .                  | .           | . |
| .            | .            | .                  | . | .                  | .           | . |
| Vv12g0630    | .            | .                  | . | .                  | .           | . |
| .            | .            | .                  | . | .                  | .           | . |
| Vv12g0631    | .            | .                  | . | .                  | .           | . |
| .            | .            | .                  | . | .                  | .           | . |
| Vv12g0632    | .            | .                  | . | .                  | .           | . |
| .            | .            | .                  | . | .                  | Vv010rg0077 | . |
| .            | .            | .                  | . | .                  | .           | . |
| Vv12g0633    | .            | .                  | . | .                  | .           | . |
| .            | .            | .                  | . | .                  | .           | . |
| Vv12g0634    | .            | .                  | . | .                  | Gorai.      | . |
| 001G092000.1 | .            | .                  | . | .                  | .           | . |
| Vv010rg0076  | .            | .                  | . | .                  | .           | . |
| Vv12g0635    | .            | .                  | . | .                  | .           | . |
| .            | .            | .                  | . | .                  | .           | . |
| .            | .            | .                  | . | .                  | .           | . |
| Vv12g0636    | .            | .                  | . | .                  | .           | . |

|             |                    |   |   |   |                    |             |   |
|-------------|--------------------|---|---|---|--------------------|-------------|---|
| .           | .                  | . | . | . | .                  | .           | . |
| .           | .                  | . | . | . | .                  | .           | . |
| Vv12g0637   | .                  | . | . | . | .                  | .           | . |
| .           | .                  | . | . | . | .                  | .           | . |
| Vv12g0638   | .                  | . | . | . | .                  | .           | . |
| .           | .                  | . | . | . | .                  | .           | . |
| Vv12g0639   | .                  | . | . | . | .                  | .           | . |
| .           | .                  | . | . | . | .                  | Vv010rg0050 | . |
| Vv12g0640   | .                  | . | . | . | .                  | .           | . |
| .           | .                  | . | . | . | .                  | .           | . |
| Vv12g0641   | .                  | . | . | . | .                  | .           | . |
| .           | .                  | . | . | . | .                  | .           | . |
| Vv12g0642   | .                  | . | . | . | .                  | .           | . |
| .           | .                  | . | . | . | .                  | .           | . |
| Vv12g0643   | .                  | . | . | . | .                  | .           | . |
| .           | .                  | . | . | . | .                  | .           | . |
| Vv12g0644   | .                  | . | . | . | .                  | .           | . |
| .           | .                  | . | . | . | .                  | .           | . |
| Vv12g0645   | .                  | . | . | . | .                  | .           | . |
| .           | .                  | . | . | . | .                  | .           | . |
| Vv12g0646   | .                  | . | . | . | .                  | .           | . |
| .           | .                  | . | . | . | .                  | .           | . |
| Vv12g0647   | .                  | . | . | . | .                  | .           | . |
| .           | .                  | . | . | . | .                  | .           | . |
| Vv12g0648   | .                  | . | . | . | .                  | .           | . |
| .           | .                  | . | . | . | .                  | .           | . |
| Vv12g0649   | .                  | . | . | . | .                  | .           | . |
| Vv19g0645   | .                  | . | . | . | .                  | .           | . |
| Vv010rg0046 | .                  | . | . | . | .                  | .           | . |
| Vv12g0650   | .                  | . | . | . | .                  | .           | . |
| Vv19g0642   | Tc07_g003130       | . | . | . | Gorai.002G089700.1 | .           | . |
|             | Gorai.009G440200.1 | . | . | . | Vv010rg0044        | .           | . |
| .           | .                  | . | . | . | .                  | .           | . |
| Vv12g0651   | .                  | . | . | . | .                  | .           | . |
| .           | .                  | . | . | . | .                  | .           | . |
| .           | .                  | . | . | . | .                  | .           | . |
| Vv12g0652   | .                  | . | . | . | .                  | .           | . |
| .           | .                  | . | . | . | .                  | .           | . |

|             |              |   |   |   |   |   |   |
|-------------|--------------|---|---|---|---|---|---|
| Vv12g0653   | .            | . | . | . | . | . | . |
| .           | .            | . | . | . | . | . | . |
| Vv12g0654   | .            | . | . | . | . | . | . |
| .           | .            | . | . | . | . | . | . |
| Vv12g0655   | .            | . | . | . | . | . | . |
| .           | .            | . | . | . | . | . | . |
| Vv12g0656   | .            | . | . | . | . | . | . |
| .           | .            | . | . | . | . | . | . |
| Vv12g0657   | Tc01_g025640 | . | . | . | . | . | . |
| .           | .            | . | . | . | . | . | . |
| Vv12g0658   | .            | . | . | . | . | . | . |
| .           | .            | . | . | . | . | . | . |
| Vv12g0659   | .            | . | . | . | . | . | . |
| Vv010rg0022 | .            | . | . | . | . | . | . |
| .           | .            | . | . | . | . | . | . |
| Vv12g0660   | .            | . | . | . | . | . | . |
| .           | .            | . | . | . | . | . | . |
| Vv12g0661   | .            | . | . | . | . | . | . |
| .           | .            | . | . | . | . | . | . |
| Vv12g0662   | .            | . | . | . | . | . | . |
| .           | .            | . | . | . | . | . | . |
| Vv12g0663   | .            | . | . | . | . | . | . |
| .           | .            | . | . | . | . | . | . |
| Vv12g0664   | .            | . | . | . | . | . | . |
| .           | .            | . | . | . | . | . | . |
| Vv12g0665   | .            | . | . | . | . | . | . |
| .           | .            | . | . | . | . | . | . |
| Vv12g0666   | .            | . | . | . | . | . | . |
| .           | .            | . | . | . | . | . | . |
| Vv12g0667   | .            | . | . | . | . | . | . |
| .           | .            | . | . | . | . | . | . |
| Vv12g0668   | .            | . | . | . | . | . | . |
| .           | .            | . | . | . | . | . | . |
| Vv12g0669   | .            | . | . | . | . | . | . |

|           |   |   |   |                    |   |   |   |
|-----------|---|---|---|--------------------|---|---|---|
| .         | . | . | . | .                  | . | . | . |
| Vv12g0670 | . | . | . | .                  | . | . | . |
| .         | . | . | . | .                  | . | . | . |
| Vv12g0671 | . | . | . | .                  | . | . | . |
| .         | . | . | . | .                  | . | . | . |
| Vv12g0672 | . | . | . | .                  | . | . | . |
| .         | . | . | . | .                  | . | . | . |
| Vv12g0673 | . | . | . | .                  | . | . | . |
| .         | . | . | . | .                  | . | . | . |
| Vv12g0674 | . | . | . | Gorai.001G194900.1 | . | . | . |
| .         | . | . | . | .                  | . | . | . |
| Vv12g0675 | . | . | . | Gorai.001G194800.1 | . | . | . |
| .         | . | . | . | .                  | . | . | . |
| Vv12g0676 | . | . | . | Gorai.001G191800.1 | . | . | . |
| .         | . | . | . | .                  | . | . | . |
| Vv12g0677 | . | . | . | .                  | . | . | . |
| .         | . | . | . | .                  | . | . | . |
| Vv12g0678 | . | . | . | .                  | . | . | . |
| .         | . | . | . | .                  | . | . | . |
| Vv12g0679 | . | . | . | .                  | . | . | . |
| .         | . | . | . | .                  | . | . | . |
| Vv12g0680 | . | . | . | .                  | . | . | . |
| .         | . | . | . | .                  | . | . | . |
| Vv12g0681 | . | . | . | .                  | . | . | . |
| .         | . | . | . | .                  | . | . | . |
| Vv12g0682 | . | . | . | .                  | . | . | . |
| .         | . | . | . | .                  | . | . | . |
| Vv12g0683 | . | . | . | .                  | . | . | . |
| .         | . | . | . | .                  | . | . | . |
| Vv12g0684 | . | . | . | .                  | . | . | . |
| .         | . | . | . | .                  | . | . | . |
| Vv12g0685 | . | . | . | .                  | . | . | . |
| .         | . | . | . | .                  | . | . | . |
| .         | . | . | . | .                  | . | . | . |

|           |              |   |   |   |                    |   |   |
|-----------|--------------|---|---|---|--------------------|---|---|
| Vv12g0686 | .            | . | . | . | .                  | . | . |
| .         | .            | . | . | . | .                  | . | . |
| Vv12g0687 | .            | . | . | . | .                  | . | . |
| .         | .            | . | . | . | .                  | . | . |
| Vv12g0688 | .            | . | . | . | .                  | . | . |
| .         | .            | . | . | . | .                  | . | . |
| Vv12g0689 | .            | . | . | . | .                  | . | . |
| .         | .            | . | . | . | .                  | . | . |
| Vv12g0690 | .            | . | . | . | .                  | . | . |
| .         | .            | . | . | . | .                  | . | . |
| Vv12g0691 | Tc01_g029130 | . | . | . | .                  | . | . |
| .         | .            | . | . | . | .                  | . | . |
| Vv12g0692 | .            | . | . | . | .                  | . | . |
| .         | .            | . | . | . | .                  | . | . |
| Vv12g0693 | .            | . | . | . | .                  | . | . |
| .         | .            | . | . | . | .                  | . | . |
| Vv12g0694 | .            | . | . | . | .                  | . | . |
| .         | .            | . | . | . | .                  | . | . |
| Vv12g0695 | .            | . | . | . | .                  | . | . |
| .         | .            | . | . | . | .                  | . | . |
| Vv12g0696 | .            | . | . | . | .                  | . | . |
| .         | .            | . | . | . | .                  | . | . |
| Vv12g0697 | .            | . | . | . | .                  | . | . |
| .         | .            | . | . | . | .                  | . | . |
| Vv12g0698 | .            | . | . | . | .                  | . | . |
| .         | .            | . | . | . | .                  | . | . |
| Vv12g0699 | .            | . | . | . | Gorai.004G057900.1 | . | . |
| .         | .            | . | . | . | .                  | . | . |
| Vv12g0700 | .            | . | . | . | .                  | . | . |
| .         | .            | . | . | . | .                  | . | . |
| Vv12g0701 | Tc01_g029240 | . | . | . | .                  | . | . |
| .         | .            | . | . | . | .                  | . | . |
| Vv12g0702 | .            | . | . | . | .                  | . | . |
| .         | .            | . | . | . | .                  | . | . |

|           |              |   |   |   |   |   |   |
|-----------|--------------|---|---|---|---|---|---|
| Vv12g0703 | .            | . | . | . | . | . | . |
| .         | .            | . | . | . | . | . | . |
| Vv12g0704 | .            | . | . | . | . | . | . |
| .         | .            | . | . | . | . | . | . |
| Vv12g0705 | .            | . | . | . | . | . | . |
| .         | .            | . | . | . | . | . | . |
| Vv12g0706 | Tc01_g011850 | . | . | . | . | . | . |
| .         | .            | . | . | . | . | . | . |
| Vv12g0707 | .            | . | . | . | . | . | . |
| .         | .            | . | . | . | . | . | . |
| Vv12g0708 | Tc01_g011860 | . | . | . | . | . | . |
| .         | .            | . | . | . | . | . | . |
| Vv12g0709 | Tc01_g011890 | . | . | . | . | . | . |
| .         | .            | . | . | . | . | . | . |
| Vv12g0710 | .            | . | . | . | . | . | . |
| .         | .            | . | . | . | . | . | . |
| Vv12g0711 | .            | . | . | . | . | . | . |
| .         | .            | . | . | . | . | . | . |
| Vv12g0712 | .            | . | . | . | . | . | . |
| .         | .            | . | . | . | . | . | . |
| Vv12g0713 | .            | . | . | . | . | . | . |
| .         | .            | . | . | . | . | . | . |
| Vv12g0714 | .            | . | . | . | . | . | . |
| .         | .            | . | . | . | . | . | . |
| Vv12g0715 | .            | . | . | . | . | . | . |
| .         | .            | . | . | . | . | . | . |
| Vv12g0716 | .            | . | . | . | . | . | . |
| .         | .            | . | . | . | . | . | . |
| Vv12g0717 | .            | . | . | . | . | . | . |
| .         | .            | . | . | . | . | . | . |
| Vv12g0718 | .            | . | . | . | . | . | . |
| .         | .            | . | . | . | . | . | . |
| Vv12g0719 | .            | . | . | . | . | . | . |

|           |   |   |   |   |   |   |   |
|-----------|---|---|---|---|---|---|---|
| .         | . | . | . | . | . | . | . |
| Vv12g0720 | . | . | . | . | . | . | . |
| .         | . | . | . | . | . | . | . |
| Vv12g0721 | . | . | . | . | . | . | . |
| .         | . | . | . | . | . | . | . |
| Vv12g0722 | . | . | . | . | . | . | . |
| .         | . | . | . | . | . | . | . |
| Vv12g0723 | . | . | . | . | . | . | . |
| .         | . | . | . | . | . | . | . |
| Vv12g0724 | . | . | . | . | . | . | . |
| .         | . | . | . | . | . | . | . |
| Vv12g0725 | . | . | . | . | . | . | . |
| .         | . | . | . | . | . | . | . |
| Vv12g0726 | . | . | . | . | . | . | . |
| .         | . | . | . | . | . | . | . |
| Vv12g0727 | . | . | . | . | . | . | . |
| .         | . | . | . | . | . | . | . |
| Vv12g0728 | . | . | . | . | . | . | . |
| .         | . | . | . | . | . | . | . |
| Vv12g0729 | . | . | . | . | . | . | . |
| .         | . | . | . | . | . | . | . |
| Vv12g0730 | . | . | . | . | . | . | . |
| .         | . | . | . | . | . | . | . |
| Vv12g0731 | . | . | . | . | . | . | . |
| .         | . | . | . | . | . | . | . |
| Vv12g0732 | . | . | . | . | . | . | . |
| .         | . | . | . | . | . | . | . |
| Vv12g0733 | . | . | . | . | . | . | . |
| .         | . | . | . | . | . | . | . |
| Vv12g0734 | . | . | . | . | . | . | . |
| .         | . | . | . | . | . | . | . |
| Vv12g0735 | . | . | . | . | . | . | . |
| .         | . | . | . | . | . | . | . |
| .         | . | . | . | . | . | . | . |



|              |                    |   |                    |   |                    |   |   |
|--------------|--------------------|---|--------------------|---|--------------------|---|---|
| Vv12g0736    | .                  | . | .                  | . | .                  | . | . |
| .            | .                  | . | .                  | . | .                  | . | . |
| Vv12g0737    | .                  | . | .                  | . | .                  | . | . |
| .            | .                  | . | .                  | . | .                  | . | . |
| Vv12g0738    | .                  | . | .                  | . | .                  | . | . |
| .            | .                  | . | .                  | . | .                  | . | . |
| Vv12g0739    | Tc01_g019650       |   | Gorai.007G163100.1 |   | .                  |   | . |
| .            | .                  | . | .                  | . | .                  | . | . |
| Vv12g0740    | .                  |   | Gorai.007G163300.1 |   | Gorai.001G225600.1 |   | . |
| .            | .                  |   | Gorai.001G100100.1 |   | Vv01g0681          |   | . |
| Tc02_g007920 | Gorai.002G170500.1 |   | .                  |   | Gorai.009G329300.1 |   | . |
| .            | .                  | . | .                  | . | .                  | . | . |
| Vv12g0741    | .                  | . | .                  | . | .                  | . | . |
| .            | .                  | . | .                  | . | .                  | . | . |
| Vv12g0742    | .                  | . | Gorai.001G225300.1 |   | .                  |   | . |
| .            | .                  | . | .                  | . | .                  | . | . |
| Vv12g0743    | .                  | . | .                  | . | Gorai.004G060600.1 |   | . |
| .            | .                  | . | .                  | . | .                  | . | . |
| Vv12g0744    | .                  | . | .                  | . | .                  | . | . |
| Vv19g0905    | .                  | . | .                  | . | .                  | . | . |
| .            | .                  | . | .                  | . | .                  | . | . |
| Vv12g0745    | .                  | . | .                  | . | .                  | . | . |
| .            | .                  | . | .                  | . | .                  | . | . |
| Vv12g0746    | .                  |   | Gorai.007G163700.1 |   | Gorai.001G224500.1 |   | . |
| .            | .                  | . | .                  | . | .                  | . | . |
| .            | .                  | . | .                  | . | .                  | . | . |
| Vv12g0747    | Tc01_g011970       |   | .                  |   | .                  |   | . |
| .            | .                  | . | .                  | . | .                  | . | . |
| Vv12g0748    | .                  | . | .                  | . | .                  | . | . |
| .            | .                  | . | .                  | . | .                  | . | . |
| Vv12g0749    | .                  | . | .                  | . | .                  | . | . |
| .            | .                  | . | .                  | . | .                  | . | . |
| Vv12g0750    | .                  | . | .                  | . | .                  | . | . |
| .            | .                  | . | .                  | . | .                  | . | . |
| Vv12g0751    | .                  | . | .                  | . | .                  | . | . |
| .            | .                  | . | .                  | . | .                  | . | . |

|                    |                    |                    |                    |                    |        |   |   |
|--------------------|--------------------|--------------------|--------------------|--------------------|--------|---|---|
| Vv12g0752          | .                  | .                  | .                  | .                  | .      | . | . |
| .                  | .                  | .                  | .                  | .                  | .      | . | . |
| Vv12g0753          | .                  | .                  | .                  | Gorai.001G189500.1 | .      | . | . |
| .                  | .                  | .                  | .                  | .                  | .      | . | . |
| Vv12g0754          | .                  | Gorai.007G164400.1 | .                  | .                  | Gorai. | . | . |
| 001G189600.1       | .                  | .                  | .                  | .                  | .      | . | . |
| .                  | .                  | Vv01g0656          | .                  | .                  | Gorai. | . | . |
| 005G153900.1       | .                  | .                  | .                  | .                  | .      | . | . |
| Vv12g0755          | .                  | .                  | .                  | .                  | .      | . | . |
| .                  | .                  | .                  | .                  | .                  | .      | . | . |
| Vv12g0756          | .                  | .                  | Gorai.001G224100.1 | .                  | .      | . | . |
| .                  | .                  | .                  | .                  | .                  | .      | . | . |
| Vv12g0757          | .                  | .                  | Gorai.001G224000.1 | Gorai.             | .      | . | . |
| 001G189700.1       | Gorai.004G060700.1 | .                  | Vv19g0884          | .                  | .      | . | . |
| Tc07_g000630       | .                  | .                  | Gorai.009G452100.1 | .                  | .      | . | . |
| .                  | .                  | .                  | .                  | .                  | .      | . | . |
| Vv12g0758          | .                  | .                  | Gorai.001G189900.1 | .                  | .      | . | . |
| .                  | Vv19g0882          | Tc07_g000650       | .                  | .                  | .      | . | . |
| Gorai.002G103200.1 | Gorai.009G451900.1 | .                  | .                  | .                  | .      | . | . |
| .                  | .                  | .                  | .                  | .                  | .      | . | . |
| Vv12g0759          | Tc01_g019330       | .                  | Gorai.001G223900.1 | .                  | .      | . | . |
| .                  | .                  | .                  | .                  | .                  | .      | . | . |
| Vv12g0760          | Tc01_g019310       | Gorai.007G164500.1 | .                  | .                  | .      | . | . |
| Gorai.004G060900.1 | .                  | .                  | .                  | .                  | .      | . | . |
| .                  | .                  | .                  | .                  | .                  | .      | . | . |
| Vv12g0761          | Tc01_g019300       | Gorai.007G164600.1 | Gorai.             | .                  | .      | . | . |
| 001G223800.1       | Gorai.001G190000.1 | Gorai.004G061000.1 | .                  | .                  | .      | . | . |
| Gorai.001G099700.1 | .                  | .                  | .                  | .                  | .      | . | . |
| .                  | .                  | .                  | .                  | .                  | .      | . | . |
| Vv12g0762          | Tc01_g019290       | Gorai.007G164700.1 | .                  | .                  | .      | . | . |
| Gorai.001G190100.1 | .                  | .                  | .                  | .                  | .      | . | . |
| .                  | .                  | .                  | .                  | .                  | .      | . | . |
| Vv12g0763          | Tc01_g019270       | Gorai.007G165000.1 | Gorai.             | .                  | .      | . | . |
| 001G223700.1       | Gorai.001G190300.1 | Gorai.001G099600.1 | .                  | .                  | .      | . | . |
| .                  | .                  | .                  | .                  | .                  | .      | . | . |
| Vv12g0764          | Tc01_g019260       | Gorai.007G165100.1 | .                  | .                  | .      | . | . |
| .                  | .                  | .                  | .                  | .                  | .      | . | . |
| .                  | .                  | .                  | .                  | .                  | .      | . | . |
| Vv12g0765          | Tc01_g019250       | Gorai.001G223300.1 | .                  | .                  | .      | . | . |
| Gorai.001G190400.1 | .                  | Gorai.001G099500.1 | .                  | .                  | .      | . | . |
| .                  | .                  | .                  | .                  | .                  | .      | . | . |

|                    |                    |                    |        |                    |   |
|--------------------|--------------------|--------------------|--------|--------------------|---|
| Vv12g0766          | Tc01_g019240       | .                  | .      | Gorai.001G190700.1 | . |
| .                  | .                  | .                  | .      | .                  | . |
| Vv12g0767          | Tc01_g019220       | Gorai.007G165200.1 | .      | .                  | . |
| .                  | Gorai.001G098400.1 | Vv19g0863          | .      | .                  | . |
| Tc07_g000790       | Gorai.013G150900.1 | Gorai.007G165200.1 | .      | .                  | . |
| Gorai.002G102300.1 | .                  | .                  | .      | .                  | . |
| Vv12g0768          | Tc01_g041020       | Gorai.007G167500.1 | .      | .                  | . |
| Gorai.001G190800.1 | Gorai.004G061200.1 | Gorai.001G098300.1 | .      | .                  | . |
| .                  | .                  | .                  | .      | .                  | . |
| Vv12g0769          | .                  | .                  | .      | .                  | . |
| .                  | .                  | .                  | .      | .                  | . |
| Vv12g0770          | .                  | .                  | .      | Gorai.             | . |
| 001G095400.1       | .                  | .                  | .      | .                  | . |
| Vv12g0771          | .                  | Gorai.001G223100.1 | .      | .                  | . |
| .                  | .                  | .                  | .      | .                  | . |
| Vv12g0772          | Tc01_g019180       | .                  | .      | Gorai.001G190900.1 | . |
| Gorai.004G061300.1 | .                  | .                  | .      | .                  | . |
| .                  | .                  | .                  | .      | .                  | . |
| Vv12g0773          | Tc01_g019170       | Gorai.007G165300.1 | .      | .                  | . |
| Gorai.001G191000.1 | .                  | .                  | .      | .                  | . |
| .                  | .                  | .                  | .      | .                  | . |
| Vv12g0774          | Tc01_g019150       | Gorai.001G223000.1 | .      | .                  | . |
| .                  | Vv19g0836          | Tc07_g001020       | Gorai. | .                  | . |
| 013G151700.1       | Gorai.002G101200.1 | .                  | .      | .                  | . |
| Vv12g0775          | Tc01_g019140       | Gorai.007G165500.1 | .      | .                  | . |
| .                  | Vv19g0835          | Tc07_g001030       | Gorai. | .                  | . |
| 013G151900.1       | Gorai.007G310200.1 | Gorai.002G101100.1 | .      | .                  | . |
| Vv12g0776          | Tc01_g019130       | Gorai.007G165600.1 | .      | .                  | . |
| .                  | .                  | .                  | .      | .                  | . |
| Vv12g0777          | .                  | .                  | .      | .                  | . |
| .                  | .                  | .                  | .      | .                  | . |
| Vv12g0778          | Tc01_g016800       | .                  | .      | .                  | . |
| .                  | .                  | .                  | .      | .                  | . |
| Vv12g0779          | Tc01_g019120       | .                  | .      | .                  | . |
| .                  | .                  | .                  | .      | .                  | . |
| .                  | .                  | .                  | .      | .                  | . |

|              |                    |                    |           |                    |   |
|--------------|--------------------|--------------------|-----------|--------------------|---|
| Vv12g0780    | .                  | .                  | .         | Gorai.001G191200.1 | . |
| .            | .                  | .                  | .         | .                  | . |
| Vv12g0781    | .                  | .                  | .         | .                  | . |
| .            | .                  | .                  | .         | .                  | . |
| Vv12g0782    | .                  | .                  | .         | .                  | . |
| .            | .                  | .                  | .         | .                  | . |
| Vv12g0783    | .                  | .                  | .         | .                  | . |
| .            | .                  | .                  | .         | .                  | . |
| Vv12g0784    | Tc01_g019110       | .                  | .         | .                  | . |
| .            | .                  | .                  | .         | .                  | . |
| Vv12g0785    | .                  | .                  | .         | .                  | . |
| .            | .                  | .                  | .         | .                  | . |
| Vv12g0786    | .                  | Gorai.007G165700.1 | .         | Gorai.001G222500.1 | . |
| .            | .                  | .                  | .         | .                  | . |
| .            | .                  | .                  | .         | .                  | . |
| Vv12g0787    | Tc01_g019040       | .                  | .         | .                  | . |
| .            | .                  | .                  | .         | .                  | . |
| .            | .                  | .                  | .         | .                  | . |
| Vv12g0788    | .                  | .                  | .         | .                  | . |
| Vv19g0818    | Tc07_g001220       | Gorai.013G152800.1 | .         | Gorai.             | . |
| 007G165700.1 | Gorai.002G100400.1 | .                  | .         | .                  | . |
| .            | .                  | .                  | .         | .                  | . |
| Vv12g0789    | Tc01_g019030       | .                  | .         | .                  | . |
| .            | .                  | .                  | .         | .                  | . |
| .            | .                  | .                  | .         | .                  | . |
| Vv12g0790    | Tc01_g001370       | .                  | .         | .                  | . |
| .            | .                  | .                  | .         | .                  | . |
| Vv01g0617    | .                  | .                  | .         | .                  | . |
| Vv12g0791    | Tc01_g001380       | .                  | .         | .                  | . |
| .            | .                  | .                  | .         | .                  | . |
| Vv01g0616    | .                  | Gorai.013G029300.1 | .         | .                  | . |
| .            | .                  | .                  | .         | .                  | . |
| Vv12g0792    | .                  | .                  | .         | .                  | . |
| .            | .                  | .                  | .         | .                  | . |
| .            | .                  | .                  | .         | .                  | . |
| Vv12g0793    | .                  | .                  | .         | .                  | . |
| .            | .                  | .                  | .         | .                  | . |
| .            | .                  | .                  | .         | .                  | . |
| Vv12g0794    | .                  | Gorai.007G166500.1 | .         | .                  | . |
| .            | .                  | .                  | .         | .                  | . |
| .            | .                  | .                  | .         | .                  | . |
| Vv12g0795    | Tc01_g019010       | Gorai.007G165800.1 | .         | Gorai.             | . |
| 001G222400.1 | .                  | .                  | Vv19g0817 | .                  | . |

|                    |                    |                    |                    |
|--------------------|--------------------|--------------------|--------------------|
| Tc07_g001240       | Gorai.013G152900.1 | Gorai.007G165800.1 |                    |
| Gorai.002G100100.1 | .                  | .                  | .                  |
| .                  | .                  | .                  | .                  |
| Vv12g0796          | Tc01_g018980       | Gorai.007G166100.1 | Gorai.             |
| 001G222300.1       | .                  | Vv19g0809          | .                  |
| Tc07_g001290       | Gorai.013G153100.1 | .                  | Gorai.002G099900.1 |
| .                  | .                  | .                  | .                  |
| .                  | .                  | .                  | .                  |
| Vv12g0797          | Tc01_g018950       | Gorai.001G222200.1 | .                  |
| .                  | .                  | .                  | .                  |
| .                  | .                  | .                  | .                  |
| Vv12g0798          | Tc01_g018900       | Gorai.001G222000.1 | .                  |
| .                  | .                  | .                  | .                  |
| .                  | .                  | .                  | .                  |
| Vv12g0799          | Tc01_g018880       | Gorai.001G221800.1 | .                  |
| .                  | .                  | .                  | .                  |
| .                  | .                  | .                  | .                  |
| Vv12g0800          | Tc01_g018870       | Gorai.007G166200.1 | Gorai.             |
| 001G221700.1       | .                  | .                  | .                  |
| .                  | .                  | .                  | .                  |
| .                  | .                  | .                  | .                  |
| Vv12g0801          | Tc01_g018860       | Gorai.007G166300.1 | .                  |
| .                  | .                  | .                  | .                  |
| .                  | .                  | .                  | .                  |
| Vv12g0802          | Tc01_g018850       | Gorai.007G166400.1 | .                  |
| .                  | .                  | .                  | .                  |
| .                  | .                  | .                  | .                  |
| Vv12g0803          | .                  | .                  | .                  |
| .                  | .                  | .                  | .                  |
| .                  | .                  | .                  | .                  |
| Vv12g0804          | .                  | .                  | .                  |
| .                  | .                  | .                  | .                  |
| .                  | .                  | .                  | .                  |
| Vv12g0805          | Tc01_g018820       | Gorai.007G166500.1 | .                  |
| .                  | .                  | .                  | .                  |
| .                  | .                  | .                  | .                  |
| Vv12g0806          | Tc01_g040790       | .                  | .                  |
| .                  | .                  | .                  | .                  |
| .                  | .                  | .                  | .                  |
| Vv12g0807          | .                  | .                  | .                  |
| .                  | .                  | .                  | .                  |
| .                  | .                  | .                  | .                  |
| Vv12g0808          | Tc01_g018760       | Gorai.001G221400.1 | .                  |
| .                  | .                  | .                  | .                  |
| .                  | .                  | .                  | .                  |
| Vv12g0809          | .                  | .                  | .                  |
| Vv19g0797          | Tc07_g001430       | .                  | Gorai.002G099000.1 |
|                    | Gorai.009G448800.1 | Gorai.004G033300.1 | .                  |
| .                  | .                  | .                  | .                  |
| Vv12g0810          | Tc01_g016500       | .                  | .                  |

|           |   |   |   |   |   |   |   |
|-----------|---|---|---|---|---|---|---|
| .         | . | . | . | . | . | . | . |
| Vv12g0811 | . | . | . | . | . | . | . |
| .         | . | . | . | . | . | . | . |
| Vv12g0812 | . | . | . | . | . | . | . |
| .         | . | . | . | . | . | . | . |
| Vv12g0813 | . | . | . | . | . | . | . |
| .         | . | . | . | . | . | . | . |
| Vv12g0814 | . | . | . | . | . | . | . |
| .         | . | . | . | . | . | . | . |
| Vv12g0815 | . | . | . | . | . | . | . |
| .         | . | . | . | . | . | . | . |
| Vv12g0816 | . | . | . | . | . | . | . |
| .         | . | . | . | . | . | . | . |
| Vv12g0817 | . | . | . | . | . | . | . |
| .         | . | . | . | . | . | . | . |
| Vv12g0818 | . | . | . | . | . | . | . |
| .         | . | . | . | . | . | . | . |
| Vv12g0819 | . | . | . | . | . | . | . |
| .         | . | . | . | . | . | . | . |
| Vv12g0820 | . | . | . | . | . | . | . |
| .         | . | . | . | . | . | . | . |
| Vv12g0821 | . | . | . | . | . | . | . |
| .         | . | . | . | . | . | . | . |
| Vv12g0822 | . | . | . | . | . | . | . |
| .         | . | . | . | . | . | . | . |
| Vv12g0823 | . | . | . | . | . | . | . |
| .         | . | . | . | . | . | . | . |
| Vv12g0824 | . | . | . | . | . | . | . |
| .         | . | . | . | . | . | . | . |
| Vv12g0825 | . | . | . | . | . | . | . |
| .         | . | . | . | . | . | . | . |
| Vv12g0826 | . | . | . | . | . | . | . |
| .         | . | . | . | . | . | . | . |
| .         | . | . | . | . | . | . | . |

|                    |                    |                    |                    |   |                    |   |
|--------------------|--------------------|--------------------|--------------------|---|--------------------|---|
| Vv12g0827          | Tc01_g018670       | .                  | .                  | . | .                  | . |
| .                  | .                  | .                  | .                  | . | .                  | . |
| Vv12g0828          | Tc01_g018650       | .                  | .                  | . | Gorai.001G191700.1 | . |
| .                  | .                  | .                  | .                  | . | .                  | . |
| Vv12g0829          | .                  | .                  | .                  | . | .                  | . |
| .                  | .                  | .                  | .                  | . | Vv01g0579          | . |
| Tc02_g028070       | Gorai.002G174100.1 | .                  | .                  | . | Gorai.005G159100.1 | . |
| .                  | .                  | .                  | .                  | . | .                  | . |
| Vv12g0830          | Tc01_g001470       | .                  | .                  | . | .                  | . |
| .                  | .                  | .                  | .                  | . | .                  | . |
| Vv12g0831          | .                  | .                  | .                  | . | Gorai.             | . |
| 001G099400.1       | .                  | .                  | .                  | . | .                  | . |
| .                  | .                  | .                  | .                  | . | .                  | . |
| Vv12g0832          | .                  | .                  | .                  | . | .                  | . |
| .                  | .                  | .                  | .                  | . | .                  | . |
| Vv12g0833          | .                  | .                  | .                  | . | .                  | . |
| .                  | .                  | .                  | .                  | . | .                  | . |
| Vv12g0834          | .                  | .                  | .                  | . | .                  | . |
| .                  | .                  | .                  | .                  | . | .                  | . |
| Vv12g0835          | Tc01_g018560       | .                  | .                  | . | .                  | . |
| .                  | .                  | .                  | .                  | . | .                  | . |
| Vv12g0836          | .                  | Gorai.007G163200.1 | .                  | . | Gorai.             | . |
| 001G192000.1       | .                  | .                  | .                  | . | .                  | . |
| .                  | .                  | .                  | .                  | . | .                  | . |
| Vv12g0837          | .                  | .                  | .                  | . | .                  | . |
| .                  | .                  | .                  | .                  | . | .                  | . |
| Vv12g0838          | .                  | .                  | Gorai.001G221100.1 | . | .                  | . |
| .                  | .                  | .                  | .                  | . | .                  | . |
| Vv12g0839          | .                  | .                  | .                  | . | Gorai.             | . |
| 001G099100.1       | .                  | .                  | .                  | . | .                  | . |
| .                  | .                  | .                  | .                  | . | .                  | . |
| Vv12g0840          | .                  | Gorai.007G166700.1 | .                  | . | .                  | . |
| .                  | .                  | .                  | .                  | . | .                  | . |
| Vv12g0841          | .                  | .                  | .                  | . | .                  | . |
| Vv19g0757          | Tc07_g001980       | .                  | Gorai.007G166600.1 | . | .                  | . |
| Gorai.002G096600.1 | Gorai.009G446200.1 | .                  | .                  | . | .                  | . |
| .                  | .                  | .                  | .                  | . | .                  | . |
| Vv12g0842          | Tc01_g018470       | Gorai.007G167000.1 | .                  | . | .                  | . |
| .                  | Vv19g0749          | Tc07_g002000       | .                  | . | .                  | . |

|                           |                                    |                                          |                              |   |
|---------------------------|------------------------------------|------------------------------------------|------------------------------|---|
| Vv01g0547                 | Gorai.002G096300.1<br>Tc02_g028520 | Gorai.009G446100.1<br>Gorai.002G177000.1 | .                            | . |
| Vv12g0843                 | Tc01_g018460                       | Gorai.007G167100.1                       | .                            | . |
| Vv12g0844                 | .                                  | .                                        | .                            | . |
| Vv12g0845                 | Gorai.007G167200.1                 | .                                        | .                            | . |
| Vv12g0846                 | Tc01_g034170                       | Gorai.007G167300.1                       | .                            | . |
| Vv12g0847                 | .                                  | Gorai.001G220400.1                       | .                            | . |
| Vv12g0848                 | Gorai.007G167400.1                 | .                                        | .                            | . |
| Vv12g0849<br>001G220100.1 | Tc01_g016320<br>Gorai.001G193100.1 | Gorai.007G167500.1<br>.                  | Gorai.<br>Gorai.001G098600.1 | . |
| Vv12g0850                 | .                                  | .                                        | .                            | . |
| Vv19g0741                 | Tc07_g002070                       | Gorai.013G156200.1                       | .                            | . |
| Gorai.002G095700.1        | Gorai.009G445900.1                 | .                                        | .                            | . |
| Vv12g0851                 | .                                  | .                                        | .                            | . |
| Vv12g0852<br>001G193200.1 | .                                  | Gorai.001G217500.1                       | Gorai.                       | . |
| Vv12g0853<br>008G125300.1 | Tc01_g034450<br>Gorai.001G193600.1 | Gorai.007G162400.1<br>.                  | Gorai.                       | . |
| Vv12g0854                 | .                                  | .                                        | .                            | . |
| Vv19g0734                 | .                                  | .                                        | .                            | . |
| Vv12g0855                 | .                                  | .                                        | .                            | . |
| Vv12g0856                 | .                                  | .                                        | .                            | . |
| Vv12g0857                 | .                                  | .                                        | .                            | . |



|              |              |                    |   |                    |        |   |   |
|--------------|--------------|--------------------|---|--------------------|--------|---|---|
| .            | .            | .                  | . | .                  | .      | . | . |
| .            | .            | .                  | . | .                  | .      | . | . |
| Vv12g0858    | .            | .                  | . | .                  | .      | . | . |
| .            | .            | .                  | . | .                  | .      | . | . |
| Vv12g0859    | .            | .                  | . | Gorai.001G193700.1 | .      | . | . |
| .            | .            | .                  | . | .                  | .      | . | . |
| Vv0Unrg9182  | .            | .                  | . | .                  | .      | . | . |
| Vv12g0860    | .            | .                  | . | .                  | .      | . | . |
| Vv19g0730    | Tc07_g002200 | .                  | . | .                  | .      | . | . |
| .            | .            | .                  | . | .                  | .      | . | . |
| Vv12g0861    | .            | .                  | . | .                  | .      | . | . |
| Vv0Unrg9198  | .            | .                  | . | .                  | .      | . | . |
| .            | .            | .                  | . | .                  | .      | . | . |
| Vv12g0862    | .            | .                  | . | .                  | .      | . | . |
| .            | .            | .                  | . | .                  | .      | . | . |
| .            | .            | .                  | . | .                  | .      | . | . |
| Vv12g0863    | .            | .                  | . | .                  | .      | . | . |
| .            | .            | .                  | . | .                  | .      | . | . |
| .            | .            | .                  | . | .                  | .      | . | . |
| Vv12g0864    | .            | Gorai.007G159700.1 | . | .                  | Gorai. | . | . |
| 001G193800.1 | .            | Gorai.001G098100.1 | . | .                  | .      | . | . |
| .            | .            | .                  | . | .                  | .      | . | . |
| .            | .            | .                  | . | .                  | .      | . | . |
| Vv12g0865    | .            | .                  | . | .                  | .      | . | . |
| Vv0Unrg9199  | .            | .                  | . | .                  | .      | . | . |
| .            | .            | .                  | . | .                  | .      | . | . |
| Vv12g0866    | .            | .                  | . | .                  | Gorai. | . | . |
| 001G095100.1 | .            | .                  | . | .                  | .      | . | . |
| .            | .            | .                  | . | .                  | .      | . | . |
| Vv12g0867    | .            | .                  | . | .                  | .      | . | . |
| .            | .            | .                  | . | .                  | .      | . | . |
| .            | .            | .                  | . | .                  | .      | . | . |
| Vv12g0868    | .            | .                  | . | .                  | .      | . | . |
| Vv0Unrg9200  | .            | .                  | . | .                  | .      | . | . |
| .            | .            | .                  | . | .                  | .      | . | . |
| Vv12g0869    | .            | .                  | . | .                  | .      | . | . |
| Vv0Unrg9201  | .            | .                  | . | .                  | .      | . | . |
| .            | .            | .                  | . | .                  | .      | . | . |
| Vv12g0870    | .            | .                  | . | .                  | .      | . | . |
| .            | .            | .                  | . | .                  | .      | . | . |
| .            | .            | .                  | . | .                  | .      | . | . |
| Vv12g0871    | .            | .                  | . | .                  | .      | . | . |
| .            | .            | .                  | . | .                  | .      | . | . |
| .            | .            | .                  | . | .                  | .      | . | . |
| Vv12g0872    | .            | .                  | . | .                  | .      | . | . |
| Vv01g0509    | .            | .                  | . | .                  | .      | . | . |
| .            | .            | .                  | . | .                  | .      | . | . |
| Vv12g0873    | .            | .                  | . | .                  | .      | . | . |
| .            | .            | .                  | . | .                  | .      | . | . |

|           |   |   |   |   |   |   |   |
|-----------|---|---|---|---|---|---|---|
| Vv12g0874 | . | . | . | . | . | . | . |
| .         | . | . | . | . | . | . | . |
| Vv12g0875 | . | . | . | . | . | . | . |
| .         | . | . | . | . | . | . | . |
| Vv12g0876 | . | . | . | . | . | . | . |
| .         | . | . | . | . | . | . | . |
| Vv12g0877 | . | . | . | . | . | . | . |
| .         | . | . | . | . | . | . | . |
| Vv12g0878 | . | . | . | . | . | . | . |
| .         | . | . | . | . | . | . | . |
| Vv12g0879 | . | . | . | . | . | . | . |
| .         | . | . | . | . | . | . | . |
| Vv12g0880 | . | . | . | . | . | . | . |
| .         | . | . | . | . | . | . | . |
| Vv12g0881 | . | . | . | . | . | . | . |
| .         | . | . | . | . | . | . | . |
| Vv12g0882 | . | . | . | . | . | . | . |
| .         | . | . | . | . | . | . | . |
| Vv12g0883 | . | . | . | . | . | . | . |
| .         | . | . | . | . | . | . | . |
| Vv12g0884 | . | . | . | . | . | . | . |
| .         | . | . | . | . | . | . | . |
| Vv12g0885 | . | . | . | . | . | . | . |
| .         | . | . | . | . | . | . | . |
| Vv12g0886 | . | . | . | . | . | . | . |
| .         | . | . | . | . | . | . | . |
| Vv12g0887 | . | . | . | . | . | . | . |
| .         | . | . | . | . | . | . | . |
| Vv12g0888 | . | . | . | . | . | . | . |
| .         | . | . | . | . | . | . | . |
| Vv12g0889 | . | . | . | . | . | . | . |
| .         | . | . | . | . | . | . | . |
| Vv12g0890 | . | . | . | . | . | . | . |

|           |   |   |   |   |   |   |   |
|-----------|---|---|---|---|---|---|---|
| .         | . | . | . | . | . | . | . |
| Vv12g0891 | . | . | . | . | . | . | . |
| .         | . | . | . | . | . | . | . |
| Vv12g0892 | . | . | . | . | . | . | . |
| .         | . | . | . | . | . | . | . |
| Vv12g0893 | . | . | . | . | . | . | . |
| .         | . | . | . | . | . | . | . |
| Vv12g0894 | . | . | . | . | . | . | . |
| .         | . | . | . | . | . | . | . |
| Vv12g0895 | . | . | . | . | . | . | . |
| .         | . | . | . | . | . | . | . |
| Vv12g0896 | . | . | . | . | . | . | . |
| .         | . | . | . | . | . | . | . |
| Vv12g0897 | . | . | . | . | . | . | . |
| .         | . | . | . | . | . | . | . |
| Vv12g0898 | . | . | . | . | . | . | . |
| .         | . | . | . | . | . | . | . |
| Vv12g0899 | . | . | . | . | . | . | . |
| .         | . | . | . | . | . | . | . |
| Vv12g0900 | . | . | . | . | . | . | . |
| .         | . | . | . | . | . | . | . |
| Vv12g0901 | . | . | . | . | . | . | . |
| Vv01g0486 | . | . | . | . | . | . | . |
| .         | . | . | . | . | . | . | . |
| Vv12g0902 | . | . | . | . | . | . | . |
| .         | . | . | . | . | . | . | . |
| Vv12g0903 | . | . | . | . | . | . | . |
| .         | . | . | . | . | . | . | . |
| Vv12g0904 | . | . | . | . | . | . | . |
| .         | . | . | . | . | . | . | . |
| Vv12g0905 | . | . | . | . | . | . | . |
| .         | . | . | . | . | . | . | . |
| Vv12g0906 | . | . | . | . | . | . | . |
| .         | . | . | . | . | . | . | . |
| .         | . | . | . | . | . | . | . |

|           |              |   |   |                    |   |   |   |
|-----------|--------------|---|---|--------------------|---|---|---|
| Vv12g0907 | .            | . | . | .                  | . | . | . |
| .         | .            | . | . | .                  | . | . | . |
| Vv12g0908 | Tc01_g005340 | . | . | .                  | . | . | . |
| .         | .            | . | . | .                  | . | . | . |
| Vv12g0909 | Tc01_g005380 | . | . | .                  | . | . | . |
| .         | .            | . | . | .                  | . | . | . |
| Vv12g0910 | .            | . | . | .                  | . | . | . |
| .         | .            | . | . | .                  | . | . | . |
| Vv12g0911 | .            | . | . | .                  | . | . | . |
| .         | .            | . | . | .                  | . | . | . |
| Vv12g0912 | .            | . | . | .                  | . | . | . |
| .         | .            | . | . | .                  | . | . | . |
| Vv12g0913 | Tc01_g008850 | . | . | .                  | . | . | . |
| .         | .            | . | . | .                  | . | . | . |
| Vv12g0914 | .            | . | . | .                  | . | . | . |
| .         | .            | . | . | .                  | . | . | . |
| Vv12g0915 | .            | . | . | .                  | . | . | . |
| .         | .            | . | . | .                  | . | . | . |
| Vv12g0916 | .            | . | . | .                  | . | . | . |
| .         | .            | . | . | .                  | . | . | . |
| Vv12g0917 | .            | . | . | .                  | . | . | . |
| .         | .            | . | . | .                  | . | . | . |
| Vv12g0918 | Tc01_g005650 | . | . | Gorai.008G078400.1 | . | . | . |
| .         | .            | . | . | .                  | . | . | . |
| Vv12g0919 | .            | . | . | .                  | . | . | . |
| .         | .            | . | . | .                  | . | . | . |
| Vv12g0920 | .            | . | . | .                  | . | . | . |
| .         | .            | . | . | .                  | . | . | . |
| Vv12g0921 | .            | . | . | .                  | . | . | . |
| .         | .            | . | . | .                  | . | . | . |
| Vv12g0922 | .            | . | . | .                  | . | . | . |
| .         | .            | . | . | .                  | . | . | . |
| Vv12g0923 | Tc01_g011090 | . | . | .                  | . | . | . |
| .         | .            | . | . | .                  | . | . | . |

|           |              |   |   |   |   |   |   |
|-----------|--------------|---|---|---|---|---|---|
| Vv12g0924 | .            | . | . | . | . | . | . |
| .         | .            | . | . | . | . | . | . |
| Vv12g0925 | .            | . | . | . | . | . | . |
| .         | .            | . | . | . | . | . | . |
| Vv12g0926 | .            | . | . | . | . | . | . |
| .         | .            | . | . | . | . | . | . |
| Vv12g0927 | .            | . | . | . | . | . | . |
| .         | .            | . | . | . | . | . | . |
| Vv12g0928 | .            | . | . | . | . | . | . |
| .         | .            | . | . | . | . | . | . |
| Vv12g0929 | .            | . | . | . | . | . | . |
| .         | .            | . | . | . | . | . | . |
| Vv12g0930 | .            | . | . | . | . | . | . |
| .         | .            | . | . | . | . | . | . |
| Vv12g0931 | .            | . | . | . | . | . | . |
| .         | .            | . | . | . | . | . | . |
| Vv12g0932 | .            | . | . | . | . | . | . |
| .         | .            | . | . | . | . | . | . |
| Vv12g0933 | .            | . | . | . | . | . | . |
| .         | .            | . | . | . | . | . | . |
| Vv12g0934 | Tc01_g011070 | . | . | . | . | . | . |
| .         | .            | . | . | . | . | . | . |
| Vv12g0935 | .            | . | . | . | . | . | . |
| .         | .            | . | . | . | . | . | . |
| Vv12g0936 | .            | . | . | . | . | . | . |
| .         | .            | . | . | . | . | . | . |
| Vv12g0937 | .            | . | . | . | . | . | . |
| .         | .            | . | . | . | . | . | . |
| Vv12g0938 | .            | . | . | . | . | . | . |
| .         | .            | . | . | . | . | . | . |
| Vv12g0939 | .            | . | . | . | . | . | . |
| .         | .            | . | . | . | . | . | . |
| Vv12g0940 | Tc01_g007670 | . | . | . | . | . | . |

|           |                    |  |                    |  |  |  |
|-----------|--------------------|--|--------------------|--|--|--|
| Vv12g0941 |                    |  |                    |  |  |  |
| Vv12g0942 |                    |  |                    |  |  |  |
| Vv12g0943 |                    |  |                    |  |  |  |
| Vv12g0944 |                    |  |                    |  |  |  |
| Vv12g0945 |                    |  |                    |  |  |  |
| Vv12g0946 |                    |  |                    |  |  |  |
| Vv12g0947 |                    |  |                    |  |  |  |
| Vv12g0948 |                    |  |                    |  |  |  |
| Vv12g0949 |                    |  |                    |  |  |  |
| Vv12g0950 | Tc01_g008780       |  | Gorai.007G060500.1 |  |  |  |
| Vv12g0951 | Tc01_g005680       |  | Gorai.008G078600.1 |  |  |  |
|           | Gorai.003G027300.1 |  |                    |  |  |  |
| Vv12g0952 | Tc01_g007620       |  |                    |  |  |  |
| Vv12g0953 |                    |  |                    |  |  |  |
| Vv12g0954 |                    |  |                    |  |  |  |
| Vv12g0955 | Tc01_g028030       |  |                    |  |  |  |
| Vv12g0956 |                    |  |                    |  |  |  |

|           |              |   |   |   |   |   |   |
|-----------|--------------|---|---|---|---|---|---|
| Vv12g0957 | .            | . | . | . | . | . | . |
| .         | .            | . | . | . | . | . | . |
| Vv12g0958 | .            | . | . | . | . | . | . |
| .         | .            | . | . | . | . | . | . |
| Vv12g0959 | .            | . | . | . | . | . | . |
| .         | .            | . | . | . | . | . | . |
| Vv12g0960 | Tc01_g019660 | . | . | . | . | . | . |
| .         | .            | . | . | . | . | . | . |
| Vv12g0961 | .            | . | . | . | . | . | . |
| .         | .            | . | . | . | . | . | . |
| Vv12g0962 | .            | . | . | . | . | . | . |
| .         | .            | . | . | . | . | . | . |
| Vv12g0963 | .            | . | . | . | . | . | . |
| .         | .            | . | . | . | . | . | . |
| Vv12g0964 | .            | . | . | . | . | . | . |
| .         | .            | . | . | . | . | . | . |
| Vv12g0965 | .            | . | . | . | . | . | . |
| .         | .            | . | . | . | . | . | . |
| Vv12g0966 | .            | . | . | . | . | . | . |
| .         | .            | . | . | . | . | . | . |
| Vv12g0967 | .            | . | . | . | . | . | . |
| .         | .            | . | . | . | . | . | . |
| Vv12g0968 | .            | . | . | . | . | . | . |
| .         | .            | . | . | . | . | . | . |
| Vv12g0969 | .            | . | . | . | . | . | . |
| .         | .            | . | . | . | . | . | . |
| Vv12g0970 | .            | . | . | . | . | . | . |
| .         | .            | . | . | . | . | . | . |
| Vv12g0971 | .            | . | . | . | . | . | . |
| .         | .            | . | . | . | . | . | . |
| Vv12g0972 | .            | . | . | . | . | . | . |
| .         | .            | . | . | . | . | . | . |
| Vv12g0973 | .            | . | . | . | . | . | . |

|           |              |                    |  |  |  |  |
|-----------|--------------|--------------------|--|--|--|--|
| Vv12g0974 |              |                    |  |  |  |  |
| Vv12g0975 |              |                    |  |  |  |  |
| Vv12g0976 |              |                    |  |  |  |  |
| Vv12g0977 | Tc01_g008530 |                    |  |  |  |  |
| Vv12g0978 |              |                    |  |  |  |  |
| Vv12g0979 |              |                    |  |  |  |  |
| Vv12g0980 |              |                    |  |  |  |  |
| Vv12g0981 |              |                    |  |  |  |  |
| Vv12g0982 | Tc01_g002490 | Gorai.007G049900.1 |  |  |  |  |
| Vv12g0983 | Tc01_g018670 |                    |  |  |  |  |
| Vv12g0984 |              |                    |  |  |  |  |
| Vv12g0985 |              |                    |  |  |  |  |
| Vv12g0986 | Tc01_g007500 | Gorai.008G088500.1 |  |  |  |  |
| Vv12g0987 | Tc01_g009400 |                    |  |  |  |  |
| Vv12g0988 |              |                    |  |  |  |  |
| Vv12g0989 | Tc01_g009520 |                    |  |  |  |  |



|           |              |                    |   |   |   |   |
|-----------|--------------|--------------------|---|---|---|---|
| Vv12g0990 | Tc01_g008300 | .                  | . | . | . | . |
| .         | .            | .                  | . | . | . | . |
| Vv12g0991 | .            | .                  | . | . | . | . |
| .         | .            | .                  | . | . | . | . |
| Vv12g0992 | Tc01_g028020 | Gorai.007G138500.1 | . | . | . | . |
| .         | .            | .                  | . | . | . | . |
| Vv12g0993 | Tc01_g007270 | .                  | . | . | . | . |
| .         | .            | .                  | . | . | . | . |
| Vv12g0994 | .            | .                  | . | . | . | . |
| .         | .            | .                  | . | . | . | . |
| Vv12g0995 | .            | .                  | . | . | . | . |
| .         | .            | .                  | . | . | . | . |
| Vv12g0996 | .            | .                  | . | . | . | . |
| .         | .            | .                  | . | . | . | . |
| Vv12g0997 | .            | .                  | . | . | . | . |
| .         | .            | .                  | . | . | . | . |
| Vv12g0998 | .            | .                  | . | . | . | . |
| .         | .            | .                  | . | . | . | . |
| Vv12g0999 | .            | .                  | . | . | . | . |
| .         | .            | .                  | . | . | . | . |
| Vv12g1000 | Tc01_g020070 | .                  | . | . | . | . |
| .         | .            | .                  | . | . | . | . |
| Vv12g1001 | .            | .                  | . | . | . | . |
| .         | .            | .                  | . | . | . | . |
| Vv12g1002 | Tc01_g013330 | .                  | . | . | . | . |
| .         | .            | .                  | . | . | . | . |
| Vv12g1003 | .            | .                  | . | . | . | . |
| .         | .            | .                  | . | . | . | . |
| Vv12g1004 | .            | .                  | . | . | . | . |
| .         | .            | .                  | . | . | . | . |
| Vv12g1005 | .            | .                  | . | . | . | . |
| .         | .            | .                  | . | . | . | . |
| Vv12g1006 | .            | .                  | . | . | . | . |
| .         | .            | .                  | . | . | . | . |



|              |              |   |   |   |   |        |   |
|--------------|--------------|---|---|---|---|--------|---|
| Vv12g1023    | .            | . | . | . | . | .      | . |
| .            | .            | . | . | . | . | .      | . |
| Vv12g1024    | .            | . | . | . | . | .      | . |
| .            | .            | . | . | . | . | .      | . |
| Vv12g1025    | .            | . | . | . | . | .      | . |
| .            | .            | . | . | . | . | .      | . |
| Vv12g1026    | Tc01_g013100 | . | . | . | . | .      | . |
| .            | .            | . | . | . | . | .      | . |
| Vv12g1027    | .            | . | . | . | . | .      | . |
| .            | .            | . | . | . | . | .      | . |
| Vv12g1028    | .            | . | . | . | . | .      | . |
| .            | .            | . | . | . | . | .      | . |
| Vv12g1029    | Tc01_g013090 | . | . | . | . | .      | . |
| .            | .            | . | . | . | . | .      | . |
| Vv12g1030    | .            | . | . | . | . | .      | . |
| .            | .            | . | . | . | . | .      | . |
| Vv12g1031    | Tc01_g002030 | . | . | . | . | Gorai. | . |
| 003G011000.1 | .            | . | . | . | . | .      | . |
| .            | .            | . | . | . | . | .      | . |
| Vv12g1032    | .            | . | . | . | . | .      | . |
| .            | .            | . | . | . | . | .      | . |
| Vv12g1033    | .            | . | . | . | . | .      | . |
| .            | .            | . | . | . | . | .      | . |
| Vv12g1034    | .            | . | . | . | . | .      | . |
| .            | .            | . | . | . | . | .      | . |
| Vv12g1035    | .            | . | . | . | . | .      | . |
| .            | .            | . | . | . | . | .      | . |
| Vv12g1036    | .            | . | . | . | . | .      | . |
| .            | .            | . | . | . | . | .      | . |
| Vv12g1037    | .            | . | . | . | . | .      | . |
| .            | .            | . | . | . | . | .      | . |
| Vv12g1038    | .            | . | . | . | . | .      | . |
| .            | .            | . | . | . | . | .      | . |
| Vv12g1039    | .            | . | . | . | . | .      | . |
| .            | .            | . | . | . | . | .      | . |

|           |              |   |   |   |   |   |   |
|-----------|--------------|---|---|---|---|---|---|
| Vv12g1040 | .            | . | . | . | . | . | . |
| .         | .            | . | . | . | . | . | . |
| Vv12g1041 | .            | . | . | . | . | . | . |
| .         | .            | . | . | . | . | . | . |
| Vv12g1042 | .            | . | . | . | . | . | . |
| .         | .            | . | . | . | . | . | . |
| Vv12g1043 | .            | . | . | . | . | . | . |
| .         | .            | . | . | . | . | . | . |
| Vv12g1044 | .            | . | . | . | . | . | . |
| .         | .            | . | . | . | . | . | . |
| Vv12g1045 | .            | . | . | . | . | . | . |
| .         | .            | . | . | . | . | . | . |
| Vv12g1046 | .            | . | . | . | . | . | . |
| .         | .            | . | . | . | . | . | . |
| Vv12g1047 | Tc01_g014770 | . | . | . | . | . | . |
| .         | .            | . | . | . | . | . | . |
| Vv12g1048 | .            | . | . | . | . | . | . |
| .         | .            | . | . | . | . | . | . |
| Vv12g1049 | .            | . | . | . | . | . | . |
| .         | .            | . | . | . | . | . | . |
| Vv12g1050 | .            | . | . | . | . | . | . |
| .         | .            | . | . | . | . | . | . |
| Vv12g1051 | .            | . | . | . | . | . | . |
| .         | .            | . | . | . | . | . | . |
| Vv12g1052 | .            | . | . | . | . | . | . |
| .         | .            | . | . | . | . | . | . |
| Vv12g1053 | .            | . | . | . | . | . | . |
| .         | .            | . | . | . | . | . | . |
| Vv12g1054 | .            | . | . | . | . | . | . |
| .         | .            | . | . | . | . | . | . |
| Vv12g1055 | .            | . | . | . | . | . | . |
| .         | .            | . | . | . | . | . | . |
| Vv12g1056 | .            | . | . | . | . | . | . |

|           |              |   |   |   |   |   |   |
|-----------|--------------|---|---|---|---|---|---|
| .         | .            | . | . | . | . | . | . |
| .         | .            | . | . | . | . | . | . |
| Vv12g1057 | .            | . | . | . | . | . | . |
| .         | .            | . | . | . | . | . | . |
| Vv12g1058 | .            | . | . | . | . | . | . |
| .         | .            | . | . | . | . | . | . |
| Vv12g1059 | .            | . | . | . | . | . | . |
| .         | .            | . | . | . | . | . | . |
| Vv12g1060 | .            | . | . | . | . | . | . |
| .         | .            | . | . | . | . | . | . |
| Vv12g1061 | .            | . | . | . | . | . | . |
| .         | .            | . | . | . | . | . | . |
| Vv12g1062 | .            | . | . | . | . | . | . |
| .         | .            | . | . | . | . | . | . |
| Vv12g1063 | .            | . | . | . | . | . | . |
| .         | .            | . | . | . | . | . | . |
| Vv12g1064 | .            | . | . | . | . | . | . |
| .         | .            | . | . | . | . | . | . |
| Vv12g1065 | .            | . | . | . | . | . | . |
| .         | .            | . | . | . | . | . | . |
| Vv12g1066 | .            | . | . | . | . | . | . |
| .         | .            | . | . | . | . | . | . |
| Vv12g1067 | .            | . | . | . | . | . | . |
| .         | .            | . | . | . | . | . | . |
| Vv12g1068 | .            | . | . | . | . | . | . |
| .         | .            | . | . | . | . | . | . |
| Vv12g1069 | .            | . | . | . | . | . | . |
| .         | .            | . | . | . | . | . | . |
| Vv12g1070 | Tc01_g020550 | . | . | . | . | . | . |
| .         | .            | . | . | . | . | . | . |
| Vv12g1071 | Tc01_g003700 | . | . | . | . | . | . |
| .         | .            | . | . | . | . | . | . |
| Vv12g1072 | .            | . | . | . | . | . | . |
| .         | .            | . | . | . | . | . | . |
| .         | .            | . | . | . | . | . | . |

|           |                    |   |                    |   |   |
|-----------|--------------------|---|--------------------|---|---|
| Vv12g1073 | Tc01_g003690       | . | .                  | . | . |
| .         | .                  | . | .                  | . | . |
| Vv12g1074 | Tc01_g003680       | . | Gorai.008G069600.1 | . | . |
| .         | .                  | . | .                  | . | . |
| Vv12g1075 | .                  | . | .                  | . | . |
| .         | .                  | . | .                  | . | . |
| Vv12g1076 | .                  | . | .                  | . | . |
| .         | .                  | . | .                  | . | . |
| Vv12g1077 | .                  | . | .                  | . | . |
| .         | .                  | . | .                  | . | . |
| Vv12g1078 | Tc01_g003670       | . | .                  | . | . |
| .         | .                  | . | .                  | . | . |
| Vv12g1079 | .                  | . | .                  | . | . |
| .         | .                  | . | .                  | . | . |
| Vv12g1080 | .                  | . | .                  | . | . |
| .         | .                  | . | .                  | . | . |
| Vv12g1081 | Tc01_g003660       | . | Gorai.008G069500.1 | . | . |
| .         | .                  | . | .                  | . | . |
| Vv12g1082 | Tc01_g003650       | . | .                  | . | . |
| .         | .                  | . | .                  | . | . |
| Vv12g1083 | .                  | . | .                  | . | . |
| .         | .                  | . | .                  | . | . |
| Vv12g1084 | .                  | . | .                  | . | . |
| .         | .                  | . | .                  | . | . |
| Vv12g1085 | .                  | . | .                  | . | . |
| .         | .                  | . | .                  | . | . |
| Vv12g1086 | Tc01_g003640       | . | Gorai.008G069400.1 | . | . |
| .         | Gorai.003G016800.1 | . | .                  | . | . |
| .         | .                  | . | .                  | . | . |
| Vv12g1087 | .                  | . | .                  | . | . |
| .         | .                  | . | .                  | . | . |
| Vv12g1088 | .                  | . | .                  | . | . |
| .         | .                  | . | .                  | . | . |
| Vv12g1089 | .                  | . | .                  | . | . |

|           |              |   |   |   |   |   |   |
|-----------|--------------|---|---|---|---|---|---|
| .         | .            | . | . | . | . | . | . |
| Vv12g1090 | .            | . | . | . | . | . | . |
| .         | .            | . | . | . | . | . | . |
| Vv12g1091 | .            | . | . | . | . | . | . |
| .         | .            | . | . | . | . | . | . |
| Vv12g1092 | .            | . | . | . | . | . | . |
| .         | .            | . | . | . | . | . | . |
| Vv12g1093 | .            | . | . | . | . | . | . |
| .         | .            | . | . | . | . | . | . |
| Vv12g1094 | .            | . | . | . | . | . | . |
| .         | .            | . | . | . | . | . | . |
| Vv12g1095 | .            | . | . | . | . | . | . |
| .         | .            | . | . | . | . | . | . |
| Vv12g1096 | .            | . | . | . | . | . | . |
| .         | .            | . | . | . | . | . | . |
| Vv12g1097 | .            | . | . | . | . | . | . |
| .         | .            | . | . | . | . | . | . |
| Vv12g1098 | .            | . | . | . | . | . | . |
| .         | .            | . | . | . | . | . | . |
| Vv12g1099 | .            | . | . | . | . | . | . |
| .         | .            | . | . | . | . | . | . |
| Vv12g1100 | .            | . | . | . | . | . | . |
| .         | .            | . | . | . | . | . | . |
| Vv12g1101 | .            | . | . | . | . | . | . |
| .         | .            | . | . | . | . | . | . |
| Vv12g1102 | .            | . | . | . | . | . | . |
| .         | .            | . | . | . | . | . | . |
| Vv12g1103 | .            | . | . | . | . | . | . |
| .         | .            | . | . | . | . | . | . |
| Vv12g1104 | Tc01_g020510 | . | . | . | . | . | . |
| .         | .            | . | . | . | . | . | . |
| Vv12g1105 | .            | . | . | . | . | . | . |
| .         | .            | . | . | . | . | . | . |
| .         | .            | . | . | . | . | . | . |

|              |              |                    |        |                    |   |   |   |
|--------------|--------------|--------------------|--------|--------------------|---|---|---|
| Vv12g1106    | .            | .                  | .      | .                  | . | . | . |
| .            | .            | .                  | .      | .                  | . | . | . |
| Vv12g1107    | .            | .                  | .      | .                  | . | . | . |
| .            | .            | .                  | .      | .                  | . | . | . |
| Vv12g1108    | .            | .                  | .      | .                  | . | . | . |
| .            | .            | .                  | .      | .                  | . | . | . |
| Vv12g1109    | .            | .                  | .      | .                  | . | . | . |
| .            | .            | .                  | .      | .                  | . | . | . |
| Vv12g1110    | .            | .                  | .      | .                  | . | . | . |
| .            | .            | .                  | .      | .                  | . | . | . |
| Vv12g1111    | .            | .                  | .      | .                  | . | . | . |
| .            | .            | .                  | .      | .                  | . | . | . |
| Vv12g1112    | .            | .                  | .      | .                  | . | . | . |
| .            | .            | .                  | .      | .                  | . | . | . |
| Vv12g1113    | .            | .                  | .      | .                  | . | . | . |
| .            | .            | .                  | .      | .                  | . | . | . |
| Vv12g1114    | .            | .                  | .      | .                  | . | . | . |
| .            | .            | .                  | .      | .                  | . | . | . |
| Vv12g1115    | .            | .                  | .      | .                  | . | . | . |
| .            | .            | .                  | .      | .                  | . | . | . |
| Vv12g1116    | .            | .                  | .      | .                  | . | . | . |
| .            | .            | .                  | .      | .                  | . | . | . |
| Vv12g1117    | .            | .                  | .      | .                  | . | . | . |
| .            | .            | .                  | .      | .                  | . | . | . |
| Vv12g1118    | .            | .                  | .      | .                  | . | . | . |
| .            | .            | .                  | .      | .                  | . | . | . |
| Vv12g1119    | .            | .                  | .      | .                  | . | . | . |
| .            | .            | .                  | .      | .                  | . | . | . |
| Vv12g1120    | Tc01_g004580 | Gorai.007G053300.1 | Gorai. | .                  | . | . | . |
| 008G073600.1 | .            | .                  | .      | .                  | . | . | . |
| .            | .            | .                  | .      | .                  | . | . | . |
| Vv12g1121    | Tc01_g001220 | .                  | .      | Gorai.007G191600.1 | . | . | . |
| .            | .            | .                  | .      | .                  | . | . | . |
| Vv12g1122    | .            | .                  | .      | .                  | . | . | . |



|           |   |   |   |   |   |   |   |
|-----------|---|---|---|---|---|---|---|
| .         | . | . | . | . | . | . | . |
| Vv12g1123 | . | . | . | . | . | . | . |
| .         | . | . | . | . | . | . | . |
| Vv12g1124 | . | . | . | . | . | . | . |
| .         | . | . | . | . | . | . | . |
| Vv12g1125 | . | . | . | . | . | . | . |
| .         | . | . | . | . | . | . | . |
| Vv12g1126 | . | . | . | . | . | . | . |
| .         | . | . | . | . | . | . | . |
| Vv12g1127 | . | . | . | . | . | . | . |
| .         | . | . | . | . | . | . | . |
| Vv12g1128 | . | . | . | . | . | . | . |
| .         | . | . | . | . | . | . | . |
| Vv12g1129 | . | . | . | . | . | . | . |
| .         | . | . | . | . | . | . | . |
| Vv12g1130 | . | . | . | . | . | . | . |
| .         | . | . | . | . | . | . | . |
| Vv12g1131 | . | . | . | . | . | . | . |
| .         | . | . | . | . | . | . | . |
| Vv12g1132 | . | . | . | . | . | . | . |
| .         | . | . | . | . | . | . | . |
| Vv12g1133 | . | . | . | . | . | . | . |
| .         | . | . | . | . | . | . | . |
| Vv12g1134 | . | . | . | . | . | . | . |
| .         | . | . | . | . | . | . | . |
| Vv12g1135 | . | . | . | . | . | . | . |
| .         | . | . | . | . | . | . | . |
| Vv12g1136 | . | . | . | . | . | . | . |
| .         | . | . | . | . | . | . | . |
| Vv12g1137 | . | . | . | . | . | . | . |
| .         | . | . | . | . | . | . | . |
| Vv12g1138 | . | . | . | . | . | . | . |
| .         | . | . | . | . | . | . | . |
| .         | . | . | . | . | . | . | . |

|           |                    |   |   |   |                    |   |   |
|-----------|--------------------|---|---|---|--------------------|---|---|
| Vv12g1139 | .                  | . | . | . | .                  | . | . |
| .         | .                  | . | . | . | .                  | . | . |
| Vv12g1140 | .                  | . | . | . | .                  | . | . |
| .         | .                  | . | . | . | .                  | . | . |
| Vv12g1141 | .                  | . | . | . | .                  | . | . |
| .         | .                  | . | . | . | .                  | . | . |
| Vv12g1142 | .                  | . | . | . | .                  | . | . |
| .         | .                  | . | . | . | .                  | . | . |
| Vv12g1143 | .                  | . | . | . | .                  | . | . |
| .         | .                  | . | . | . | .                  | . | . |
| Vv12g1144 | .                  | . | . | . | .                  | . | . |
| .         | .                  | . | . | . | .                  | . | . |
| Vv12g1145 | .                  | . | . | . | .                  | . | . |
| .         | .                  | . | . | . | .                  | . | . |
| Vv12g1146 | .                  | . | . | . | .                  | . | . |
| .         | .                  | . | . | . | .                  | . | . |
| Vv12g1147 | .                  | . | . | . | .                  | . | . |
| .         | .                  | . | . | . | .                  | . | . |
| Vv12g1148 | .                  | . | . | . | .                  | . | . |
| .         | .                  | . | . | . | .                  | . | . |
| Vv12g1149 | .                  | . | . | . | .                  | . | . |
| .         | .                  | . | . | . | .                  | . | . |
| Vv12g1150 | .                  | . | . | . | .                  | . | . |
| .         | .                  | . | . | . | .                  | . | . |
| Vv12g1151 | .                  | . | . | . | .                  | . | . |
| .         | .                  | . | . | . | .                  | . | . |
| Vv12g1152 | .                  | . | . | . | .                  | . | . |
| .         | .                  | . | . | . | .                  | . | . |
| Vv12g1153 | .                  | . | . | . | .                  | . | . |
| .         | .                  | . | . | . | .                  | . | . |
| Vv12g1154 | .                  | . | . | . | .                  | . | . |
| .         | .                  | . | . | . | .                  | . | . |
| Vv12g1155 | Tc01_g000990       | . | . | . | Gorai.007G190200.1 | . | . |
|           | Gorai.003G005100.1 | . | . | . | .                  | . | . |

|                           |              |                    |        |
|---------------------------|--------------|--------------------|--------|
| Vv12g1156<br>008G073200.1 | Tc01_g004520 | Gorai.007G053000.1 | Gorai. |
| Vv12g1157                 | Tc01_g040190 |                    |        |
| Vv12g1158                 |              |                    |        |
| Vv12g1159                 |              |                    |        |
| Vv12g1160                 |              |                    |        |
| Vv12g1161                 |              |                    |        |
| Vv12g1162                 |              |                    |        |
| Vv12g1163                 |              |                    |        |
| Vv12g1164                 | Tc01_g040200 |                    |        |
| Vv12g1165                 |              |                    |        |
| Vv12g1166                 |              |                    |        |
| Vv12g1167                 |              |                    |        |
| Vv12g1168                 |              |                    |        |
| Vv12g1169                 |              |                    |        |
| Vv12g1170                 |              |                    |        |
| Vv12g1171                 |              |                    |        |

|           |              |   |   |   |   |   |
|-----------|--------------|---|---|---|---|---|
| Vv12g1172 | Tc01_g040220 | . | . | . | . | . |
| .         | .            | . | . | . | . | . |
| Vv12g1173 | .            | . | . | . | . | . |
| .         | .            | . | . | . | . | . |
| Vv12g1174 | .            | . | . | . | . | . |
| .         | .            | . | . | . | . | . |
| Vv12g1175 | .            | . | . | . | . | . |
| .         | .            | . | . | . | . | . |
| Vv12g1176 | .            | . | . | . | . | . |
| .         | .            | . | . | . | . | . |
| Vv12g1177 | .            | . | . | . | . | . |
| .         | .            | . | . | . | . | . |
| Vv12g1178 | .            | . | . | . | . | . |
| .         | .            | . | . | . | . | . |
| Vv12g1179 | .            | . | . | . | . | . |
| .         | .            | . | . | . | . | . |
| Vv12g1180 | .            | . | . | . | . | . |
| .         | .            | . | . | . | . | . |
| Vv12g1181 | .            | . | . | . | . | . |
| .         | .            | . | . | . | . | . |
| Vv12g1182 | .            | . | . | . | . | . |
| .         | .            | . | . | . | . | . |
| Vv12g1183 | .            | . | . | . | . | . |
| .         | .            | . | . | . | . | . |
| Vv12g1184 | .            | . | . | . | . | . |
| .         | .            | . | . | . | . | . |
| Vv12g1185 | .            | . | . | . | . | . |
| .         | .            | . | . | . | . | . |
| Vv12g1186 | .            | . | . | . | . | . |
| .         | .            | . | . | . | . | . |
| Vv12g1187 | .            | . | . | . | . | . |
| .         | .            | . | . | . | . | . |
| Vv12g1188 | .            | . | . | . | . | . |

|           |   |   |   |   |   |   |   |
|-----------|---|---|---|---|---|---|---|
| .         | . | . | . | . | . | . | . |
| Vv12g1189 | . | . | . | . | . | . | . |
| .         | . | . | . | . | . | . | . |
| Vv12g1190 | . | . | . | . | . | . | . |
| .         | . | . | . | . | . | . | . |
| Vv12g1191 | . | . | . | . | . | . | . |
| .         | . | . | . | . | . | . | . |
| Vv12g1192 | . | . | . | . | . | . | . |
| .         | . | . | . | . | . | . | . |
| Vv12g1193 | . | . | . | . | . | . | . |
| .         | . | . | . | . | . | . | . |
| Vv12g1194 | . | . | . | . | . | . | . |
| .         | . | . | . | . | . | . | . |
| Vv12g1195 | . | . | . | . | . | . | . |
| .         | . | . | . | . | . | . | . |
| Vv12g1196 | . | . | . | . | . | . | . |
| .         | . | . | . | . | . | . | . |
| Vv12g1197 | . | . | . | . | . | . | . |
| .         | . | . | . | . | . | . | . |
| Vv12g1198 | . | . | . | . | . | . | . |
| .         | . | . | . | . | . | . | . |
| Vv12g1199 | . | . | . | . | . | . | . |
| .         | . | . | . | . | . | . | . |
| Vv12g1200 | . | . | . | . | . | . | . |
| .         | . | . | . | . | . | . | . |
| Vv12g1201 | . | . | . | . | . | . | . |
| .         | . | . | . | . | . | . | . |
| Vv12g1202 | . | . | . | . | . | . | . |
| .         | . | . | . | . | . | . | . |
| Vv12g1203 | . | . | . | . | . | . | . |
| .         | . | . | . | . | . | . | . |
| Vv12g1204 | . | . | . | . | . | . | . |
| .         | . | . | . | . | . | . | . |
| .         | . | . | . | . | . | . | . |

|           |              |   |   |   |   |   |   |
|-----------|--------------|---|---|---|---|---|---|
| Vv12g1205 | .            | . | . | . | . | . | . |
| .         | .            | . | . | . | . | . | . |
| Vv12g1206 | .            | . | . | . | . | . | . |
| .         | .            | . | . | . | . | . | . |
| Vv12g1207 | .            | . | . | . | . | . | . |
| .         | .            | . | . | . | . | . | . |
| Vv12g1208 | .            | . | . | . | . | . | . |
| .         | .            | . | . | . | . | . | . |
| Vv12g1209 | .            | . | . | . | . | . | . |
| .         | .            | . | . | . | . | . | . |
| Vv12g1210 | .            | . | . | . | . | . | . |
| .         | .            | . | . | . | . | . | . |
| Vv12g1211 | .            | . | . | . | . | . | . |
| .         | .            | . | . | . | . | . | . |
| Vv12g1212 | .            | . | . | . | . | . | . |
| .         | .            | . | . | . | . | . | . |
| Vv12g1213 | .            | . | . | . | . | . | . |
| .         | .            | . | . | . | . | . | . |
| Vv12g1214 | .            | . | . | . | . | . | . |
| .         | .            | . | . | . | . | . | . |
| Vv12g1215 | .            | . | . | . | . | . | . |
| .         | .            | . | . | . | . | . | . |
| Vv12g1216 | .            | . | . | . | . | . | . |
| .         | .            | . | . | . | . | . | . |
| Vv12g1217 | .            | . | . | . | . | . | . |
| .         | .            | . | . | . | . | . | . |
| Vv12g1218 | Tc01_g040290 | . | . | . | . | . | . |
| .         | .            | . | . | . | . | . | . |
| Vv12g1219 | .            | . | . | . | . | . | . |
| .         | .            | . | . | . | . | . | . |
| Vv12g1220 | Tc01_g010920 | . | . | . | . | . | . |
| .         | .            | . | . | . | . | . | . |
| Vv12g1221 | .            | . | . | . | . | . | . |
| .         | .            | . | . | . | . | . | . |

|           |              |   |   |   |   |   |   |
|-----------|--------------|---|---|---|---|---|---|
| Vv12g1222 | .            | . | . | . | . | . | . |
| .         | .            | . | . | . | . | . | . |
| Vv12g1223 | .            | . | . | . | . | . | . |
| .         | .            | . | . | . | . | . | . |
| Vv12g1224 | .            | . | . | . | . | . | . |
| .         | .            | . | . | . | . | . | . |
| Vv12g1225 | .            | . | . | . | . | . | . |
| .         | .            | . | . | . | . | . | . |
| Vv12g1226 | .            | . | . | . | . | . | . |
| .         | .            | . | . | . | . | . | . |
| Vv12g1227 | .            | . | . | . | . | . | . |
| .         | .            | . | . | . | . | . | . |
| Vv12g1228 | Tc01_g040220 | . | . | . | . | . | . |
| .         | .            | . | . | . | . | . | . |
| Vv12g1229 | .            | . | . | . | . | . | . |
| .         | .            | . | . | . | . | . | . |
| Vv12g1230 | Tc01_g040210 | . | . | . | . | . | . |
| .         | .            | . | . | . | . | . | . |
| Vv12g1231 | .            | . | . | . | . | . | . |
| .         | .            | . | . | . | . | . | . |
| Vv12g1232 | Tc01_g040200 | . | . | . | . | . | . |
| .         | .            | . | . | . | . | . | . |
| Vv12g1233 | Tc01_g040190 | . | . | . | . | . | . |
| .         | .            | . | . | . | . | . | . |
| Vv12g1234 | .            | . | . | . | . | . | . |
| .         | .            | . | . | . | . | . | . |
| Vv12g1235 | Tc01_g040180 | . | . | . | . | . | . |
| .         | .            | . | . | . | . | . | . |
| Vv12g1236 | .            | . | . | . | . | . | . |
| .         | .            | . | . | . | . | . | . |
| Vv12g1237 | .            | . | . | . | . | . | . |
| .         | .            | . | . | . | . | . | . |
| Vv12g1238 | .            | . | . | . | . | . | . |

|           |              |  |                    |  |  |
|-----------|--------------|--|--------------------|--|--|
| Vv12g1239 | Tc01_g040170 |  |                    |  |  |
| Vv12g1240 | Tc01_g040160 |  | Gorai.008G112600.1 |  |  |
| Vv12g1241 |              |  |                    |  |  |
| Vv12g1242 | Tc01_g040150 |  |                    |  |  |
| Vv12g1243 |              |  |                    |  |  |
| Vv12g1244 |              |  |                    |  |  |
| Vv12g1245 |              |  |                    |  |  |
| Vv12g1246 |              |  |                    |  |  |
| Vv12g1247 |              |  |                    |  |  |
| Vv12g1248 | Tc01_g040050 |  |                    |  |  |
| Vv12g1249 |              |  |                    |  |  |
| Vv12g1250 | Tc01_g040010 |  |                    |  |  |
| Vv12g1251 |              |  |                    |  |  |
| Vv12g1252 |              |  |                    |  |  |
| Vv12g1253 |              |  |                    |  |  |
| Vv12g1254 | Tc01_g011350 |  |                    |  |  |



|           |              |   |   |                    |   |   |   |
|-----------|--------------|---|---|--------------------|---|---|---|
| Vv12g1255 | .            | . | . | .                  | . | . | . |
| .         | .            | . | . | .                  | . | . | . |
| Vv12g1256 | Tc01_g039880 | . | . | Gorai.008G111100.1 | . | . | . |
| .         | .            | . | . | .                  | . | . | . |
| Vv12g1257 | Tc01_g038610 | . | . | .                  | . | . | . |
| .         | .            | . | . | .                  | . | . | . |
| Vv12g1258 | Tc01_g007650 | . | . | .                  | . | . | . |
| .         | .            | . | . | .                  | . | . | . |
| Vv12g1259 | .            | . | . | .                  | . | . | . |
| .         | .            | . | . | .                  | . | . | . |
| Vv12g1260 | .            | . | . | .                  | . | . | . |
| .         | .            | . | . | .                  | . | . | . |
| Vv12g1261 | .            | . | . | .                  | . | . | . |
| .         | .            | . | . | .                  | . | . | . |
| Vv12g1262 | .            | . | . | .                  | . | . | . |
| .         | .            | . | . | .                  | . | . | . |
| Vv12g1263 | .            | . | . | .                  | . | . | . |
| .         | .            | . | . | .                  | . | . | . |
| Vv12g1264 | .            | . | . | .                  | . | . | . |
| .         | .            | . | . | .                  | . | . | . |
| Vv12g1265 | .            | . | . | .                  | . | . | . |
| .         | .            | . | . | .                  | . | . | . |
| Vv12g1266 | .            | . | . | .                  | . | . | . |
| .         | .            | . | . | .                  | . | . | . |
| Vv12g1267 | .            | . | . | .                  | . | . | . |
| .         | .            | . | . | .                  | . | . | . |
| Vv12g1268 | .            | . | . | .                  | . | . | . |
| .         | .            | . | . | .                  | . | . | . |
| Vv12g1269 | .            | . | . | .                  | . | . | . |
| .         | .            | . | . | .                  | . | . | . |
| Vv12g1270 | .            | . | . | .                  | . | . | . |
| .         | .            | . | . | .                  | . | . | . |
| Vv12g1271 | .            | . | . | .                  | . | . | . |
| .         | .            | . | . | .                  | . | . | . |

|           |              |   |   |   |   |   |   |
|-----------|--------------|---|---|---|---|---|---|
| Vv12g1272 | .            | . | . | . | . | . | . |
| .         | .            | . | . | . | . | . | . |
| Vv12g1273 | .            | . | . | . | . | . | . |
| .         | .            | . | . | . | . | . | . |
| Vv12g1274 | .            | . | . | . | . | . | . |
| .         | .            | . | . | . | . | . | . |
| Vv12g1275 | .            | . | . | . | . | . | . |
| .         | .            | . | . | . | . | . | . |
| Vv12g1276 | .            | . | . | . | . | . | . |
| .         | .            | . | . | . | . | . | . |
| Vv12g1277 | .            | . | . | . | . | . | . |
| .         | .            | . | . | . | . | . | . |
| Vv12g1278 | .            | . | . | . | . | . | . |
| .         | .            | . | . | . | . | . | . |
| Vv12g1279 | .            | . | . | . | . | . | . |
| .         | .            | . | . | . | . | . | . |
| Vv12g1280 | .            | . | . | . | . | . | . |
| .         | .            | . | . | . | . | . | . |
| Vv12g1281 | Tc01_g040010 | . | . | . | . | . | . |
| .         | .            | . | . | . | . | . | . |
| Vv12g1282 | .            | . | . | . | . | . | . |
| .         | .            | . | . | . | . | . | . |
| Vv12g1283 | .            | . | . | . | . | . | . |
| .         | .            | . | . | . | . | . | . |
| Vv12g1284 | .            | . | . | . | . | . | . |
| .         | .            | . | . | . | . | . | . |
| Vv12g1285 | .            | . | . | . | . | . | . |
| .         | .            | . | . | . | . | . | . |
| Vv12g1286 | .            | . | . | . | . | . | . |
| .         | .            | . | . | . | . | . | . |
| Vv12g1287 | .            | . | . | . | . | . | . |
| .         | .            | . | . | . | . | . | . |
| Vv12g1288 | .            | . | . | . | . | . | . |

|           |                                    |  |  |                    |  |  |  |
|-----------|------------------------------------|--|--|--------------------|--|--|--|
| Vv12g1289 |                                    |  |  |                    |  |  |  |
| Vv12g1290 |                                    |  |  |                    |  |  |  |
| Vv12g1291 |                                    |  |  |                    |  |  |  |
| Vv12g1292 |                                    |  |  |                    |  |  |  |
| Vv12g1293 |                                    |  |  |                    |  |  |  |
| Vv12g1294 |                                    |  |  |                    |  |  |  |
| Vv12g1295 |                                    |  |  |                    |  |  |  |
| Vv12g1296 |                                    |  |  |                    |  |  |  |
| Vv12g1297 | Tc01_g038650                       |  |  |                    |  |  |  |
| Vv12g1298 | Tc01_g007620                       |  |  |                    |  |  |  |
| Vv12g1299 |                                    |  |  |                    |  |  |  |
| Vv12g1300 | Tc01_g007590<br>Gorai.003G036300.1 |  |  | Gorai.008G088900.1 |  |  |  |
| Vv12g1301 |                                    |  |  |                    |  |  |  |
| Vv12g1302 |                                    |  |  |                    |  |  |  |
| Vv12g1303 |                                    |  |  |                    |  |  |  |
| Vv12g1304 |                                    |  |  |                    |  |  |  |

|           |              |   |                    |   |   |   |
|-----------|--------------|---|--------------------|---|---|---|
| Vv12g1305 | Tc01_g040050 | . | .                  | . | . | . |
| .         | .            | . | .                  | . | . | . |
| Vv12g1306 | .            | . | .                  | . | . | . |
| .         | .            | . | .                  | . | . | . |
| Vv12g1307 | .            | . | .                  | . | . | . |
| .         | .            | . | .                  | . | . | . |
| Vv12g1308 | .            | . | .                  | . | . | . |
| .         | .            | . | .                  | . | . | . |
| Vv12g1309 | .            | . | .                  | . | . | . |
| .         | .            | . | .                  | . | . | . |
| Vv12g1310 | .            | . | .                  | . | . | . |
| .         | .            | . | .                  | . | . | . |
| Vv12g1311 | .            | . | .                  | . | . | . |
| .         | .            | . | .                  | . | . | . |
| Vv12g1312 | .            | . | .                  | . | . | . |
| .         | .            | . | .                  | . | . | . |
| Vv12g1313 | .            | . | .                  | . | . | . |
| .         | .            | . | .                  | . | . | . |
| Vv12g1314 | .            | . | .                  | . | . | . |
| .         | .            | . | .                  | . | . | . |
| Vv12g1315 | .            | . | .                  | . | . | . |
| .         | .            | . | .                  | . | . | . |
| Vv12g1316 | Tc01_g040150 | . | .                  | . | . | . |
| .         | .            | . | .                  | . | . | . |
| Vv12g1317 | Tc01_g040160 | . | Gorai.008G112600.1 | . | . | . |
| .         | .            | . | .                  | . | . | . |
| Vv12g1318 | Tc01_g012740 | . | .                  | . | . | . |
| .         | .            | . | .                  | . | . | . |
| Vv12g1319 | Tc01_g012730 | . | .                  | . | . | . |
| .         | .            | . | .                  | . | . | . |
| Vv12g1320 | .            | . | .                  | . | . | . |
| .         | .            | . | .                  | . | . | . |
| Vv12g1321 | .            | . | .                  | . | . | . |

|           |              |   |   |   |   |   |
|-----------|--------------|---|---|---|---|---|
| Vv12g1322 | Tc01_g007530 | . | . | . | . | . |
| Vv12g1323 | .            | . | . | . | . | . |
| Vv12g1324 | .            | . | . | . | . | . |
| Vv12g1325 | .            | . | . | . | . | . |
| Vv12g1326 | .            | . | . | . | . | . |
| Vv12g1327 | Tc01_g040170 | . | . | . | . | . |
| Vv12g1328 | Tc01_g040180 | . | . | . | . | . |
| Vv12g1329 | .            | . | . | . | . | . |
| Vv12g1330 | Tc01_g040190 | . | . | . | . | . |
| Vv12g1331 | .            | . | . | . | . | . |
| Vv12g1332 | .            | . | . | . | . | . |
| Vv12g1333 | Tc01_g040200 | . | . | . | . | . |
| Vv12g1334 | .            | . | . | . | . | . |
| Vv12g1335 | .            | . | . | . | . | . |
| Vv12g1336 | .            | . | . | . | . | . |
| Vv12g1337 | .            | . | . | . | . | . |

|              |              |   |   |   |        |   |
|--------------|--------------|---|---|---|--------|---|
| Vv12g1338    | Tc01_g040210 | . | . | . | .      | . |
| .            | .            | . | . | . | .      | . |
| Vv12g1339    | Tc01_g040220 | . | . | . | .      | . |
| .            | .            | . | . | . | .      | . |
| Vv12g1340    | .            | . | . | . | .      | . |
| .            | .            | . | . | . | .      | . |
| Vv12g1341    | .            | . | . | . | .      | . |
| .            | .            | . | . | . | .      | . |
| Vv12g1342    | .            | . | . | . | .      | . |
| .            | .            | . | . | . | .      | . |
| Vv12g1343    | .            | . | . | . | .      | . |
| .            | .            | . | . | . | .      | . |
| Vv12g1344    | .            | . | . | . | .      | . |
| .            | .            | . | . | . | .      | . |
| Vv12g1345    | .            | . | . | . | .      | . |
| .            | .            | . | . | . | .      | . |
| Vv12g1346    | Tc01_g037320 | . | . | . | .      | . |
| .            | .            | . | . | . | .      | . |
| Vv12g1347    | .            | . | . | . | .      | . |
| .            | .            | . | . | . | .      | . |
| Vv12g1348    | .            | . | . | . | .      | . |
| .            | .            | . | . | . | .      | . |
| Vv12g1349    | .            | . | . | . | .      | . |
| .            | .            | . | . | . | .      | . |
| Vv12g1350    | .            | . | . | . | .      | . |
| .            | .            | . | . | . | .      | . |
| Vv12g1351    | .            | . | . | . | .      | . |
| .            | .            | . | . | . | .      | . |
| Vv12g1352    | Tc01_g007220 | . | . | . | .      | . |
| 003G034500.1 | .            | . | . | . | Gorai. | . |
| .            | .            | . | . | . | .      | . |
| Vv12g1353    | .            | . | . | . | .      | . |
| .            | .            | . | . | . | .      | . |
| Vv12g1354    | .            | . | . | . | .      | . |
| .            | .            | . | . | . | .      | . |

|                    |              |   |                    |        |
|--------------------|--------------|---|--------------------|--------|
| Vv12g1355          | Tc01_g002030 | . | .                  | Gorai. |
| 003G011000.1       | .            | . | .                  | .      |
| Vv12g1356          | .            | . | .                  | .      |
| .                  | .            | . | .                  | .      |
| Vv12g1357          | Tc01_g007200 | . | Gorai.008G087500.1 | .      |
| Gorai.003G034200.1 | .            | . | .                  | .      |
| .                  | .            | . | .                  | .      |
| Vv12g1358          | Tc01_g002220 | . | Gorai.008G064700.1 | .      |
| .                  | .            | . | .                  | .      |
| Vv12g1359          | .            | . | .                  | .      |
| .                  | .            | . | .                  | .      |
| Vv12g1360          | .            | . | .                  | .      |
| .                  | .            | . | .                  | .      |
| Vv12g1361          | .            | . | .                  | .      |
| .                  | .            | . | .                  | .      |
| Vv12g1362          | Tc01_g025760 | . | .                  | .      |
| .                  | .            | . | .                  | .      |
| Vv12g1363          | Tc01_g038770 | . | .                  | .      |
| .                  | .            | . | .                  | .      |
| Vv12g1364          | .            | . | .                  | .      |
| .                  | .            | . | .                  | .      |
| Vv12g1365          | .            | . | .                  | .      |
| .                  | .            | . | .                  | .      |
| Vv12g1366          | .            | . | .                  | .      |
| .                  | .            | . | .                  | .      |
| Vv12g1367          | .            | . | .                  | .      |
| .                  | .            | . | .                  | .      |
| Vv12g1368          | Tc01_g038760 | . | .                  | .      |
| .                  | .            | . | .                  | .      |
| Vv12g1369          | Tc01_g038750 | . | .                  | .      |
| .                  | .            | . | .                  | .      |
| Vv12g1370          | .            | . | .                  | .      |
| .                  | .            | . | .                  | .      |
| .                  | .            | . | .                  | .      |

|              |              |   |   |   |   |        |   |
|--------------|--------------|---|---|---|---|--------|---|
| Vv12g1371    | .            | . | . | . | . | .      | . |
| .            | .            | . | . | . | . | .      | . |
| Vv12g1372    | .            | . | . | . | . | .      | . |
| .            | .            | . | . | . | . | .      | . |
| Vv12g1373    | .            | . | . | . | . | .      | . |
| .            | .            | . | . | . | . | .      | . |
| Vv12g1374    | .            | . | . | . | . | .      | . |
| .            | .            | . | . | . | . | .      | . |
| Vv12g1375    | .            | . | . | . | . | .      | . |
| .            | .            | . | . | . | . | .      | . |
| Vv12g1376    | .            | . | . | . | . | .      | . |
| .            | .            | . | . | . | . | .      | . |
| Vv12g1377    | .            | . | . | . | . | .      | . |
| .            | .            | . | . | . | . | .      | . |
| Vv12g1378    | .            | . | . | . | . | .      | . |
| .            | .            | . | . | . | . | .      | . |
| Vv12g1379    | Tc01_g026140 | . | . | . | . | .      | . |
| .            | .            | . | . | . | . | .      | . |
| Vv12g1380    | .            | . | . | . | . | .      | . |
| .            | .            | . | . | . | . | .      | . |
| Vv12g1381    | Tc01_g037000 | . | . | . | . | .      | . |
| .            | .            | . | . | . | . | .      | . |
| Vv12g1382    | .            | . | . | . | . | .      | . |
| .            | .            | . | . | . | . | .      | . |
| Vv12g1383    | .            | . | . | . | . | .      | . |
| .            | .            | . | . | . | . | .      | . |
| Vv12g1384    | .            | . | . | . | . | .      | . |
| .            | .            | . | . | . | . | .      | . |
| Vv12g1385    | Tc01_g002530 | . | . | . | . | Gorai. | . |
| 003G012700.1 | .            | . | . | . | . | .      | . |
| .            | .            | . | . | . | . | .      | . |
| Vv12g1386    | .            | . | . | . | . | .      | . |
| .            | .            | . | . | . | . | .      | . |
| Vv12g1387    | .            | . | . | . | . | .      | . |
| .            | .            | . | . | . | . | .      | . |



|           |              |   |                    |   |   |   |   |
|-----------|--------------|---|--------------------|---|---|---|---|
| Vv12g1388 | .            | . | .                  | . | . | . | . |
| .         | .            | . | .                  | . | . | . | . |
| Vv12g1389 | .            | . | .                  | . | . | . | . |
| .         | .            | . | .                  | . | . | . | . |
| Vv12g1390 | .            | . | .                  | . | . | . | . |
| .         | .            | . | .                  | . | . | . | . |
| Vv12g1391 | .            | . | .                  | . | . | . | . |
| .         | .            | . | .                  | . | . | . | . |
| Vv12g1392 | Tc01_g026460 |   | Gorai.007G152300.1 | . | . | . | . |
| .         | .            | . | .                  | . | . | . | . |
| Vv12g1393 | Tc01_g026890 |   | .                  | . | . | . | . |
| .         | .            | . | .                  | . | . | . | . |
| Vv12g1394 | .            | . | .                  | . | . | . | . |
| .         | .            | . | .                  | . | . | . | . |
| Vv12g1395 | .            | . | .                  | . | . | . | . |
| .         | .            | . | .                  | . | . | . | . |
| Vv12g1396 | Tc01_g002670 |   | .                  | . | . | . | . |
| .         | .            | . | .                  | . | . | . | . |
| Vv12g1397 | .            | . | .                  | . | . | . | . |
| .         | .            | . | .                  | . | . | . | . |
| Vv12g1398 | Tc01_g002680 |   | .                  | . | . | . | . |
| .         | .            | . | .                  | . | . | . | . |
| Vv12g1399 | .            | . | .                  | . | . | . | . |
| .         | .            | . | .                  | . | . | . | . |
| Vv12g1400 | .            | . | .                  | . | . | . | . |
| .         | .            | . | .                  | . | . | . | . |
| Vv12g1401 | .            | . | .                  | . | . | . | . |
| .         | .            | . | .                  | . | . | . | . |
| Vv12g1402 | .            | . | .                  | . | . | . | . |
| .         | .            | . | .                  | . | . | . | . |
| Vv12g1403 | .            | . | .                  | . | . | . | . |
| .         | .            | . | .                  | . | . | . | . |
| Vv12g1404 | .            | . | .                  | . | . | . | . |

|           |   |   |   |   |   |   |   |
|-----------|---|---|---|---|---|---|---|
| .         | . | . | . | . | . | . | . |
| Vv12g1405 | . | . | . | . | . | . | . |
| .         | . | . | . | . | . | . | . |
| Vv12g1406 | . | . | . | . | . | . | . |
| .         | . | . | . | . | . | . | . |
| Vv12g1407 | . | . | . | . | . | . | . |
| .         | . | . | . | . | . | . | . |
| Vv12g1408 | . | . | . | . | . | . | . |
| .         | . | . | . | . | . | . | . |
| Vv12g1409 | . | . | . | . | . | . | . |
| .         | . | . | . | . | . | . | . |
| Vv12g1410 | . | . | . | . | . | . | . |
| .         | . | . | . | . | . | . | . |
| Vv12g1411 | . | . | . | . | . | . | . |
| .         | . | . | . | . | . | . | . |
| Vv12g1412 | . | . | . | . | . | . | . |
| .         | . | . | . | . | . | . | . |
| Vv12g1413 | . | . | . | . | . | . | . |
| .         | . | . | . | . | . | . | . |
| Vv12g1414 | . | . | . | . | . | . | . |
| .         | . | . | . | . | . | . | . |
| Vv12g1415 | . | . | . | . | . | . | . |
| .         | . | . | . | . | . | . | . |
| Vv12g1416 | . | . | . | . | . | . | . |
| .         | . | . | . | . | . | . | . |
| Vv12g1417 | . | . | . | . | . | . | . |
| .         | . | . | . | . | . | . | . |
| Vv12g1418 | . | . | . | . | . | . | . |
| .         | . | . | . | . | . | . | . |
| Vv12g1419 | . | . | . | . | . | . | . |
| .         | . | . | . | . | . | . | . |
| Vv12g1420 | . | . | . | . | . | . | . |
| .         | . | . | . | . | . | . | . |
| .         | . | . | . | . | . | . | . |



|              |              |   |   |   |        |   |
|--------------|--------------|---|---|---|--------|---|
| Vv12g1438    | Tc01_g003110 | . | . | . | .      | . |
| .            | .            | . | . | . | .      | . |
| Vv12g1439    | .            | . | . | . | .      | . |
| .            | .            | . | . | . | .      | . |
| Vv12g1440    | .            | . | . | . | .      | . |
| .            | .            | . | . | . | .      | . |
| Vv12g1441    | Tc01_g003370 | . | . | . | Gorai. | . |
| 003G015600.1 | .            | . | . | . | .      | . |
| .            | .            | . | . | . | .      | . |
| Vv12g1442    | .            | . | . | . | .      | . |
| .            | .            | . | . | . | .      | . |
| Vv12g1443    | .            | . | . | . | .      | . |
| .            | .            | . | . | . | .      | . |
| Vv12g1444    | .            | . | . | . | .      | . |
| .            | .            | . | . | . | .      | . |
| Vv12g1445    | .            | . | . | . | .      | . |
| .            | .            | . | . | . | .      | . |
| Vv12g1446    | .            | . | . | . | .      | . |
| .            | .            | . | . | . | .      | . |
| Vv12g1447    | .            | . | . | . | .      | . |
| .            | .            | . | . | . | .      | . |
| Vv12g1448    | .            | . | . | . | .      | . |
| .            | .            | . | . | . | .      | . |
| Vv12g1449    | .            | . | . | . | .      | . |
| .            | .            | . | . | . | .      | . |
| Vv12g1450    | .            | . | . | . | .      | . |
| .            | .            | . | . | . | .      | . |
| Vv12g1451    | .            | . | . | . | .      | . |
| .            | .            | . | . | . | .      | . |
| Vv12g1452    | .            | . | . | . | .      | . |
| .            | .            | . | . | . | .      | . |
| Vv12g1453    | .            | . | . | . | .      | . |
| .            | .            | . | . | . | .      | . |
| Vv12g1454    | .            | . | . | . | .      | . |

|           |   |   |   |   |   |   |   |
|-----------|---|---|---|---|---|---|---|
| .         | . | . | . | . | . | . | . |
| Vv12g1455 | . | . | . | . | . | . | . |
| .         | . | . | . | . | . | . | . |
| Vv12g1456 | . | . | . | . | . | . | . |
| .         | . | . | . | . | . | . | . |
| Vv12g1457 | . | . | . | . | . | . | . |
| .         | . | . | . | . | . | . | . |
| Vv12g1458 | . | . | . | . | . | . | . |
| .         | . | . | . | . | . | . | . |
| Vv12g1459 | . | . | . | . | . | . | . |
| .         | . | . | . | . | . | . | . |
| Vv12g1460 | . | . | . | . | . | . | . |
| .         | . | . | . | . | . | . | . |
| Vv12g1461 | . | . | . | . | . | . | . |
| .         | . | . | . | . | . | . | . |
| Vv12g1462 | . | . | . | . | . | . | . |
| .         | . | . | . | . | . | . | . |
| Vv12g1463 | . | . | . | . | . | . | . |
| .         | . | . | . | . | . | . | . |
| Vv12g1464 | . | . | . | . | . | . | . |
| .         | . | . | . | . | . | . | . |
| Vv12g1465 | . | . | . | . | . | . | . |
| .         | . | . | . | . | . | . | . |
| Vv12g1466 | . | . | . | . | . | . | . |
| .         | . | . | . | . | . | . | . |
| Vv12g1467 | . | . | . | . | . | . | . |
| .         | . | . | . | . | . | . | . |
| Vv12g1468 | . | . | . | . | . | . | . |
| .         | . | . | . | . | . | . | . |
| Vv12g1469 | . | . | . | . | . | . | . |
| .         | . | . | . | . | . | . | . |
| Vv12g1470 | . | . | . | . | . | . | . |
| .         | . | . | . | . | . | . | . |
| .         | . | . | . | . | . | . | . |

|              |              |                    |   |   |        |   |   |
|--------------|--------------|--------------------|---|---|--------|---|---|
| Vv12g1471    | .            | .                  | . | . | .      | . | . |
| .            | .            | .                  | . | . | .      | . | . |
| Vv12g1472    | .            | .                  | . | . | .      | . | . |
| .            | .            | .                  | . | . | .      | . | . |
| Vv12g1473    | .            | .                  | . | . | .      | . | . |
| .            | .            | .                  | . | . | .      | . | . |
| Vv12g1474    | .            | .                  | . | . | .      | . | . |
| .            | .            | .                  | . | . | .      | . | . |
| Vv12g1475    | .            | .                  | . | . | .      | . | . |
| .            | .            | .                  | . | . | .      | . | . |
| Vv12g1476    | .            | .                  | . | . | .      | . | . |
| .            | .            | .                  | . | . | .      | . | . |
| Vv12g1477    | .            | .                  | . | . | .      | . | . |
| .            | .            | .                  | . | . | .      | . | . |
| Vv12g1478    | .            | .                  | . | . | .      | . | . |
| .            | .            | .                  | . | . | .      | . | . |
| Vv12g1479    | .            | .                  | . | . | .      | . | . |
| .            | .            | .                  | . | . | .      | . | . |
| Vv12g1480    | .            | .                  | . | . | .      | . | . |
| .            | .            | .                  | . | . | .      | . | . |
| Vv12g1481    | .            | .                  | . | . | .      | . | . |
| .            | .            | .                  | . | . | .      | . | . |
| Vv13g0001    | .            | .                  | . | . | .      | . | . |
| .            | .            | .                  | . | . | .      | . | . |
| Vv13g0002    | .            | Gorai.013G021900.1 | . | . | .      | . | . |
| .            | .            | .                  | . | . | .      | . | . |
| Vv13g0003    | .            | Gorai.013G010300.1 | . | . | .      | . | . |
| .            | .            | .                  | . | . | .      | . | . |
| Vv13g0004    | .            | Gorai.013G010200.1 | . | . | .      | . | . |
| .            | .            | .                  | . | . | .      | . | . |
| Vv13g0005    | .            | Gorai.013G010100.1 | . | . | Gorai. | . | . |
| 009G291800.1 | .            | .                  | . | . | .      | . | . |
| .            | .            | .                  | . | . | .      | . | . |
| Vv13g0006    | Tc10_g010020 | .                  | . | . | .      | . | . |

|                    |                    |                    |                    |                    |        |   |   |
|--------------------|--------------------|--------------------|--------------------|--------------------|--------|---|---|
| .                  | .                  | .                  | .                  | .                  | .      | . | . |
| .                  | .                  | .                  | .                  | .                  | .      | . | . |
| Vv13g0007          | .                  | .                  | .                  | Gorai.009G291900.1 | .      | . | . |
| .                  | .                  | .                  | .                  | .                  | .      | . | . |
| .                  | .                  | .                  | .                  | .                  | .      | . | . |
| Vv13g0008          | Tc10_g002060       | .                  | .                  | .                  | .      | . | . |
| Vv06g0723          | .                  | .                  | .                  | .                  | .      | . | . |
| .                  | .                  | .                  | .                  | .                  | .      | . | . |
| Vv13g0009          | .                  | Gorai.013G010000.1 | .                  | .                  | .      | . | . |
| .                  | .                  | .                  | .                  | .                  | .      | . | . |
| .                  | .                  | .                  | .                  | .                  | .      | . | . |
| Vv13g0010          | .                  | Gorai.013G009900.1 | .                  | .                  | Gorai. | . | . |
| 009G292000.1       | .                  | .                  | .                  | .                  | .      | . | . |
| .                  | .                  | .                  | .                  | .                  | .      | . | . |
| .                  | .                  | .                  | .                  | .                  | .      | . | . |
| Vv13g0011          | .                  | Gorai.013G006900.1 | .                  | .                  | Gorai. | . | . |
| 009G292100.1       | .                  | .                  | .                  | .                  | .      | . | . |
| .                  | .                  | .                  | .                  | .                  | .      | . | . |
| .                  | .                  | .                  | .                  | .                  | .      | . | . |
| Vv13g0012          | .                  | .                  | .                  | .                  | .      | . | . |
| .                  | .                  | .                  | .                  | .                  | .      | . | . |
| .                  | .                  | .                  | .                  | .                  | .      | . | . |
| Vv13g0013          | .                  | .                  | .                  | .                  | .      | . | . |
| .                  | .                  | .                  | .                  | .                  | .      | . | . |
| .                  | .                  | .                  | .                  | .                  | .      | . | . |
| Vv13g0014          | .                  | Gorai.013G019300.1 | .                  | Gorai.011G283400.1 | .      | . | . |
| .                  | Gorai.010G198800.1 | .                  | .                  | .                  | .      | . | . |
| .                  | .                  | .                  | .                  | .                  | .      | . | . |
| .                  | .                  | .                  | .                  | .                  | .      | . | . |
| Vv13g0015          | .                  | .                  | .                  | .                  | Gorai. | . | . |
| 012G075900.1       | .                  | .                  | .                  | .                  | .      | . | . |
| .                  | .                  | .                  | .                  | .                  | .      | . | . |
| .                  | .                  | .                  | .                  | .                  | .      | . | . |
| Vv13g0016          | .                  | .                  | .                  | .                  | .      | . | . |
| .                  | .                  | .                  | .                  | .                  | .      | . | . |
| .                  | .                  | .                  | .                  | .                  | .      | . | . |
| Vv13g0017          | .                  | .                  | Gorai.011G283500.1 | .                  | .      | . | . |
| Gorai.010G198700.1 | .                  | .                  | Vv06g0735          | Tc09_g030170       | .      | . | . |
| Gorai.001G115400.1 | .                  | .                  | Gorai.004G007000.1 | .                  | .      | . | . |
| Gorai.003G123600.1 | .                  | .                  | .                  | .                  | .      | . | . |
| .                  | .                  | .                  | .                  | .                  | .      | . | . |
| Vv13g0018          | .                  | .                  | .                  | .                  | .      | . | . |
| .                  | .                  | .                  | .                  | .                  | .      | . | . |
| .                  | .                  | .                  | .                  | .                  | .      | . | . |
| Vv13g0019          | .                  | Gorai.013G019200.1 | .                  | Gorai.011G283600.1 | .      | . | . |
| Gorai.009G322100.1 | .                  | .                  | .                  | .                  | .      | . | . |
| .                  | .                  | .                  | .                  | .                  | .      | . | . |
| .                  | .                  | .                  | .                  | .                  | .      | . | . |
| Vv13g0020          | .                  | Gorai.013G019000.1 | .                  | Gorai.011G283700.1 | .      | . | . |
| .                  | .                  | Gorai.012G076000.1 | .                  | Vv06g0737          | .      | . | . |
| Tc09_g030150       | .                  | .                  | .                  | Gorai.003G123400.1 | .      | . | . |

|                    |                    |                    |                    |                    |   |
|--------------------|--------------------|--------------------|--------------------|--------------------|---|
| Vv13g0021          | .                  | .                  | Gorai.011G283800.1 | .                  | . |
| .                  | .                  | .                  | .                  | .                  | . |
| Vv13g0022          | Tc10_g001900       | .                  | Gorai.013G018900.1 | Gorai.             | . |
| 011G283900.1       | .                  | .                  | Gorai.012G076100.1 | Vv08g1125          | . |
| Tc05_g002780       | Gorai.006G181400.1 | .                  | Gorai.002G262100.1 | .                  | . |
| .                  | Gorai.012G112900.1 | .                  | .                  | .                  | . |
| .                  | .                  | .                  | .                  | .                  | . |
| Vv13g0023          | .                  | .                  | .                  | .                  | . |
| .                  | .                  | .                  | .                  | .                  | . |
| .                  | .                  | .                  | .                  | .                  | . |
| Vv13g0024          | .                  | .                  | .                  | Gorai.             | . |
| 012G076200.1       | .                  | .                  | .                  | .                  | . |
| .                  | .                  | .                  | .                  | .                  | . |
| Vv13g0025          | .                  | .                  | Gorai.009G322200.1 | .                  | . |
| .                  | .                  | .                  | .                  | .                  | . |
| Vv06g0738          | Tc09_g030140       | .                  | Gorai.001G115500.1 | .                  | . |
| .                  | .                  | .                  | .                  | .                  | . |
| Vv13g0026          | Tc10_g001670       | .                  | .                  | .                  | . |
| .                  | .                  | .                  | .                  | .                  | . |
| .                  | .                  | .                  | .                  | .                  | . |
| Vv13g0027          | Tc10_g001660       | .                  | .                  | .                  | . |
| .                  | .                  | .                  | .                  | .                  | . |
| .                  | .                  | .                  | .                  | .                  | . |
| Vv13g0028          | Tc10_g001620       | .                  | .                  | Gorai.009G322300.1 | . |
| .                  | .                  | .                  | .                  | .                  | . |
| .                  | Vv06g0740          | Tc09_g030120       | Gorai.013G260600.1 | .                  | . |
| Gorai.001G115600.1 | .                  | .                  | .                  | .                  | . |
| Vv13g0029          | Tc10_g001610       | .                  | .                  | .                  | . |
| .                  | .                  | .                  | .                  | .                  | . |
| .                  | .                  | .                  | .                  | .                  | . |
| Vv13g0030          | .                  | .                  | .                  | .                  | . |
| .                  | .                  | .                  | .                  | .                  | . |
| .                  | .                  | .                  | .                  | .                  | . |
| Vv13g0031          | .                  | .                  | .                  | Gorai.             | . |
| 012G076300.1       | Vv08g1137          | Tc05_g002660       | .                  | .                  | . |
| Gorai.002G148600.1 | .                  | .                  | .                  | .                  | . |
| .                  | .                  | .                  | .                  | .                  | . |
| Vv13g0032          | .                  | Gorai.011G285700.1 | .                  | .                  | . |
| Gorai.012G076400.1 | Vv08g1139          | Tc05_g002630       | .                  | .                  | . |
| .                  | Gorai.012G113200.1 | .                  | .                  | .                  | . |
| .                  | .                  | .                  | .                  | .                  | . |
| Vv13g0033          | .                  | Gorai.011G285800.1 | .                  | .                  | . |
| .                  | .                  | .                  | .                  | .                  | . |
| .                  | .                  | .                  | .                  | .                  | . |
| Vv13g0034          | .                  | Gorai.013G018700.1 | .                  | .                  | . |
| Gorai.012G076700.1 | Vv08g1140          | Tc05_g002620       | .                  | .                  | . |
| Gorai.006G181800.1 | .                  | Gorai.007G378800.1 | .                  | .                  | . |
| .                  | .                  | .                  | .                  | .                  | . |



|           |                    |                    |                    |                    |                    |   |   |
|-----------|--------------------|--------------------|--------------------|--------------------|--------------------|---|---|
| Vv13g0035 | .                  | .                  | .                  | .                  | .                  | . | . |
| .         | .                  | .                  | .                  | .                  | .                  | . | . |
| Vv13g0036 | .                  | .                  | .                  | .                  | .                  | . | . |
| .         | .                  | .                  | .                  | .                  | .                  | . | . |
| Vv13g0037 | .                  | .                  | .                  | .                  | .                  | . | . |
| .         | .                  | .                  | .                  | .                  | .                  | . | . |
| Vv13g0038 | .                  | .                  | .                  | .                  | .                  | . | . |
| .         | .                  | .                  | .                  | .                  | .                  | . | . |
| Vv13g0039 | .                  | .                  | .                  | .                  | .                  | . | . |
| .         | .                  | .                  | .                  | .                  | .                  | . | . |
| Vv13g0040 | .                  | .                  | Gorai.011G286200.1 | .                  | .                  | . | . |
| .         | .                  | .                  | .                  | .                  | .                  | . | . |
| Vv13g0041 | .                  | Gorai.013G018400.1 | .                  | Gorai.011G286300.1 | .                  | . | . |
| .         | Gorai.010G198400.1 | .                  | Gorai.012G076800.1 | .                  | .                  | . | . |
| .         | .                  | .                  | .                  | .                  | .                  | . | . |
| Vv13g0042 | .                  | .                  | .                  | .                  | .                  | . | . |
| .         | .                  | .                  | .                  | .                  | .                  | . | . |
| Vv13g0043 | .                  | .                  | .                  | .                  | Gorai.010G198300.1 | . | . |
| .         | .                  | .                  | .                  | .                  | .                  | . | . |
| Vv13g0044 | .                  | .                  | .                  | .                  | .                  | . | . |
| .         | .                  | .                  | .                  | .                  | .                  | . | . |
| Vv13g0045 | Tc10_g009860       | .                  | .                  | .                  | .                  | . | . |
| .         | .                  | .                  | .                  | .                  | .                  | . | . |
| Vv13g0046 | .                  | .                  | .                  | .                  | .                  | . | . |
| .         | .                  | .                  | .                  | .                  | .                  | . | . |
| Vv13g0047 | .                  | Gorai.013G018300.1 | .                  | .                  | .                  | . | . |
| .         | Vv08g1150          | Tc05_g002500       | .                  | .                  | .                  | . | . |
| .         | Gorai.012G114000.1 | .                  | .                  | .                  | .                  | . | . |
| .         | .                  | .                  | .                  | .                  | .                  | . | . |
| Vv13g0048 | .                  | .                  | .                  | .                  | .                  | . | . |
| .         | .                  | .                  | .                  | .                  | .                  | . | . |
| Vv13g0049 | .                  | .                  | .                  | .                  | .                  | . | . |
| .         | .                  | .                  | .                  | .                  | .                  | . | . |
| Vv13g0050 | .                  | .                  | .                  | .                  | .                  | . | . |
| .         | .                  | .                  | .                  | .                  | .                  | . | . |
| .         | .                  | .                  | .                  | .                  | .                  | . | . |

|                    |                    |                    |              |                    |   |        |   |
|--------------------|--------------------|--------------------|--------------|--------------------|---|--------|---|
| Vv13g0051          | .                  | .                  | .            | .                  | . | .      | . |
| .                  | .                  | .                  | .            | .                  | . | .      | . |
| Vv13g0052          | .                  | .                  | .            | .                  | . | .      | . |
| .                  | .                  | .                  | .            | .                  | . | .      | . |
| Vv13g0053          | .                  | .                  | .            | .                  | . | .      | . |
| .                  | .                  | .                  | .            | .                  | . | .      | . |
| Vv13g0054          | .                  | .                  | .            | .                  | . | .      | . |
| .                  | .                  | .                  | .            | .                  | . | .      | . |
| Vv13g0055          | Tc10_g001560       | .                  | .            | .                  | . | Gorai. | . |
| 010G198200.1       | .                  | .                  | .            | .                  | . | .      | . |
| .                  | .                  | .                  | .            | .                  | . | .      | . |
| Vv13g0056          | Tc10_g001550       | .                  | .            | Gorai.011G287800.1 | . | .      | . |
| Gorai.010G198100.1 | .                  | .                  | .            | .                  | . | .      | . |
| .                  | .                  | Vv06g0772          | Tc09_g029920 | .                  | . | .      | . |
| .                  | .                  | Gorai.009G092100.1 | .            | .                  | . | .      | . |
| Vv13g0057          | Tc10_g001540       | .                  | .            | Gorai.011G287900.1 | . | .      | . |
| .                  | .                  | .                  | .            | .                  | . | .      | . |
| .                  | Vv06g0773          | Tc09_g029910       | .            | .                  | . | .      | . |
| .                  | Gorai.006G106600.1 | .                  | .            | .                  | . | .      | . |
| Vv13g0058          | Tc10_g001510       | .                  | .            | .                  | . | Gorai. | . |
| 010G198000.1       | Gorai.012G076900.1 | .                  | .            | Vv08g1152          | . | .      | . |
| .                  | .                  | .                  | .            | Vv06g0779          | . | .      | . |
| Tc09_g029880       | .                  | .                  | .            | Gorai.009G091700.1 | . | .      | . |
| Gorai.006G106400.1 | .                  | .                  | .            | .                  | . | .      | . |
| Vv13g0059          | Tc10_g001480       | .                  | .            | Gorai.011G288000.1 | . | .      | . |
| Gorai.010G197900.1 | .                  | .                  | .            | Vv08g0345          | . | .      | . |
| .                  | .                  | .                  | .            | Vv06g0781          | . | .      | . |
| Tc09_g029860       | .                  | .                  | .            | Gorai.009G091400.1 | . | .      | . |
| Vv13g0060          | Tc10_g001460       | .                  | .            | .                  | . | Gorai. | . |
| 010G197800.1       | .                  | .                  | .            | .                  | . | .      | . |
| .                  | .                  | .                  | .            | .                  | . | .      | . |
| Vv13g0061          | Tc10_g001450       | Gorai.013G018100.1 | .            | Gorai.             | . | .      | . |
| 011G288100.1       | Gorai.010G197700.1 | .                  | .            | .                  | . | .      | . |
| .                  | .                  | .                  | .            | .                  | . | .      | . |
| .                  | .                  | .                  | .            | .                  | . | .      | . |
| Vv13g0062          | Tc10_g001430       | Gorai.013G018000.1 | .            | Gorai.             | . | .      | . |
| 011G288400.1       | .                  | .                  | Vv08g0348    | .                  | . | .      | . |
| .                  | .                  | .                  | .            | .                  | . | .      | . |
| .                  | .                  | .                  | .            | .                  | . | .      | . |
| Vv13g0063          | Tc10_g001420       | .                  | .            | .                  | . | .      | . |
| .                  | .                  | .                  | .            | .                  | . | .      | . |
| .                  | .                  | .                  | .            | .                  | . | .      | . |
| Vv13g0064          | .                  | Gorai.011G288600.1 | .            | .                  | . | .      | . |
| .                  | .                  | .                  | .            | .                  | . | .      | . |
| .                  | .                  | .                  | .            | .                  | . | .      | . |
| Vv13g0065          | Tc10_g001410       | .                  | .            | Gorai.011G289100.1 | . | .      | . |

|                    |                    |                    |                    |                    |   |
|--------------------|--------------------|--------------------|--------------------|--------------------|---|
| Gorai.009G322600.1 | .                  | .                  | .                  | .                  | . |
| .                  | .                  | .                  | Vv06g0784          | Tc09_g029790       | . |
| .                  | .                  | .                  | Gorai.009G091300.1 | .                  | . |
| Vv13g0066          | Tc10_g001400       | Gorai.013G017700.1 | Gorai.             | .                  | . |
| 011G289200.1       | .                  | Gorai.010G196600.1 | .                  | Vv08g0350          | . |
| Tc05_g002430       | .                  | .                  | .                  | Gorai.012G114500.1 | . |
| .                  | .                  | .                  | .                  | .                  | . |
| Vv13g0067          | Tc10_g001390       | Gorai.011G289300.1 | .                  | .                  | . |
| .                  | Gorai.012G077000.1 | .                  | .                  | .                  | . |
| .                  | .                  | .                  | .                  | .                  | . |
| .                  | .                  | .                  | .                  | .                  | . |
| Vv13g0068          | Tc10_g001380       | Gorai.013G017600.1 | Gorai.             | .                  | . |
| 011G289400.1       | .                  | Gorai.010G196500.1 | .                  | .                  | . |
| .                  | .                  | .                  | .                  | Vv06g0785          | . |
| Tc09_g029780       | .                  | Gorai.001G116400.1 | Gorai.004G007300.1 | .                  | . |
| Gorai.009G091200.1 | .                  | Gorai.006G106300.1 | .                  | .                  | . |
| Vv13g0069          | .                  | .                  | .                  | .                  | . |
| .                  | .                  | .                  | .                  | .                  | . |
| .                  | .                  | .                  | .                  | .                  | . |
| Vv13g0070          | .                  | .                  | .                  | .                  | . |
| .                  | .                  | .                  | .                  | .                  | . |
| .                  | .                  | .                  | .                  | .                  | . |
| Vv13g0071          | .                  | .                  | .                  | .                  | . |
| .                  | .                  | .                  | .                  | .                  | . |
| .                  | .                  | .                  | .                  | .                  | . |
| Vv13g0072          | Tc10_g001370       | Gorai.011G289500.1 | .                  | .                  | . |
| .                  | .                  | .                  | .                  | .                  | . |
| .                  | .                  | .                  | .                  | .                  | . |
| Vv13g0073          | Tc10_g001360       | Gorai.011G289600.1 | .                  | .                  | . |
| .                  | Vv08g0357          | Tc05_g002310       | .                  | .                  | . |
| Gorai.002G262800.1 | .                  | Gorai.012G115000.1 | .                  | .                  | . |
| Vv06g0788          | Tc09_g029750       | Gorai.001G116500.1 | .                  | .                  | . |
| .                  | Gorai.006G106100.1 | .                  | .                  | .                  | . |
| Vv13g0074          | Tc10_g001350       | .                  | .                  | .                  | . |
| Gorai.012G077100.1 | .                  | .                  | .                  | .                  | . |
| .                  | .                  | .                  | .                  | .                  | . |
| Vv13g0075          | .                  | .                  | .                  | .                  | . |
| Vv08g0360          | Tc05_g002290       | .                  | .                  | Gorai.             | . |
| 012G115100.1       | .                  | .                  | .                  | .                  | . |
| .                  | .                  | .                  | .                  | .                  | . |
| Vv13g0076          | Tc10_g001340       | Gorai.013G017500.1 | .                  | .                  | . |
| .                  | .                  | .                  | .                  | .                  | . |
| .                  | .                  | .                  | .                  | .                  | . |
| Vv13g0077          | Tc10_g001320       | .                  | .                  | .                  | . |
| Gorai.012G077500.1 | .                  | .                  | .                  | .                  | . |
| .                  | Vv06g0798          | Tc09_g029660       | Gorai.             | .                  | . |
| 001G116900.1       | .                  | Gorai.006G105300.1 | .                  | .                  | . |
| Vv13g0078          | .                  | .                  | .                  | .                  | . |
| .                  | .                  | .                  | .                  | .                  | . |
| .                  | .                  | .                  | .                  | .                  | . |

|                    |                    |                    |   |   |   |                    |   |
|--------------------|--------------------|--------------------|---|---|---|--------------------|---|
| Vv13g0079          | .                  | .                  | . | . | . | .                  | . |
| .                  | .                  | .                  | . | . | . | .                  | . |
| .                  | .                  | .                  | . | . | . | .                  | . |
| Vv13g0080          | Tc10_g001300       | .                  | . | . | . | .                  | . |
| .                  | .                  | .                  | . | . | . | .                  | . |
| .                  | .                  | .                  | . | . | . | .                  | . |
| Vv13g0081          | Tc10_g001290       | .                  | . | . | . | Gorai.             | . |
| 010G196300.1       | .                  | .                  | . | . | . | .                  | . |
| .                  | .                  | .                  | . | . | . | .                  | . |
| Vv13g0082          | Tc10_g001280       | .                  | . | . | . | .                  | . |
| .                  | .                  | .                  | . | . | . | .                  | . |
| .                  | .                  | .                  | . | . | . | .                  | . |
| Vv13g0083          | .                  | .                  | . | . | . | .                  | . |
| .                  | .                  | .                  | . | . | . | .                  | . |
| .                  | .                  | .                  | . | . | . | .                  | . |
| Vv13g0084          | Tc10_g001270       | .                  | . | . | . | .                  | . |
| Gorai.012G077700.1 | .                  | .                  | . | . | . | .                  | . |
| .                  | Vv06g0801          | .                  | . | . | . | .                  | . |
| .                  | .                  | .                  | . | . | . | .                  | . |
| Vv13g0085          | Tc10_g001260       | Gorai.013G017300.1 | . | . | . | .                  | . |
| Gorai.009G322700.1 | Gorai.010G196100.1 | Gorai.012G077900.1 | . | . | . | .                  | . |
| .                  | .                  | .                  | . | . | . | .                  | . |
| Vv06g0804          | .                  | .                  | . | . | . | .                  | . |
| Vv13g0086          | Tc10_g001250       | Gorai.013G017200.1 | . | . | . | .                  | . |
| .                  | .                  | .                  | . | . | . | .                  | . |
| .                  | .                  | .                  | . | . | . | .                  | . |
| Vv13g0087          | Tc10_g001240       | .                  | . | . | . | .                  | . |
| Gorai.012G078000.1 | .                  | .                  | . | . | . | .                  | . |
| .                  | .                  | .                  | . | . | . | .                  | . |
| Vv13g0088          | Tc10_g001230       | .                  | . | . | . | .                  | . |
| Gorai.012G078100.1 | .                  | .                  | . | . | . | .                  | . |
| .                  | .                  | .                  | . | . | . | .                  | . |
| Vv13g0089          | Tc10_g001220       | .                  | . | . | . | .                  | . |
| Gorai.012G078200.1 | .                  | .                  | . | . | . | .                  | . |
| .                  | .                  | .                  | . | . | . | .                  | . |
| Vv13g0090          | .                  | .                  | . | . | . | .                  | . |
| .                  | .                  | .                  | . | . | . | .                  | . |
| .                  | .                  | .                  | . | . | . | .                  | . |
| Vv13g0091          | .                  | .                  | . | . | . | .                  | . |
| .                  | .                  | .                  | . | . | . | .                  | . |
| .                  | .                  | .                  | . | . | . | .                  | . |
| Vv13g0092          | .                  | .                  | . | . | . | .                  | . |
| .                  | .                  | .                  | . | . | . | Vv06g0813          | . |
| .                  | .                  | .                  | . | . | . | Gorai.003G147200.1 | . |
| Vv13g0093          | Tc10_g001190       | Gorai.013G017100.1 | . | . | . | .                  | . |
| .                  | Gorai.012G078300.1 | .                  | . | . | . | .                  | . |
| .                  | .                  | .                  | . | . | . | .                  | . |
| .                  | .                  | .                  | . | . | . | .                  | . |
| Vv13g0094          | .                  | .                  | . | . | . | .                  | . |
| .                  | .                  | .                  | . | . | . | .                  | . |

|                    |                    |                    |                    |                    |        |   |
|--------------------|--------------------|--------------------|--------------------|--------------------|--------|---|
| Vv13g0095          | .                  | .                  | .                  | .                  | .      | . |
| .                  | .                  | .                  | .                  | .                  | .      | . |
| Vv13g0096          | Tc10_g001180       | .                  | .                  | .                  | .      | . |
| .                  | .                  | .                  | .                  | .                  | .      | . |
| Vv13g0097          | Tc10_g001170       | Gorai.013G017000.1 | .                  | .                  | .      | . |
| .                  | .                  | .                  | .                  | .                  | .      | . |
| Vv13g0098          | Tc10_g001160       | .                  | Gorai.011G290800.1 | .                  | .      | . |
| .                  | .                  | .                  | .                  | .                  | .      | . |
| Vv13g0099          | Tc10_g001150       | .                  | .                  | .                  | .      | . |
| .                  | .                  | .                  | .                  | .                  | .      | . |
| Vv13g0100          | Tc10_g001140       | .                  | .                  | .                  | .      | . |
| .                  | .                  | .                  | .                  | .                  | .      | . |
| Vv13g0101          | Tc10_g001130       | .                  | .                  | .                  | .      | . |
| .                  | .                  | .                  | .                  | .                  | .      | . |
| Vv06g0821          | .                  | .                  | .                  | Gorai.009G112300.1 | .      | . |
| .                  | .                  | .                  | .                  | .                  | .      | . |
| Vv13g0102          | Tc10_g001120       | .                  | .                  | .                  | Gorai. | . |
| 010G195800.1       | .                  | .                  | .                  | .                  | .      | . |
| .                  | .                  | .                  | .                  | .                  | .      | . |
| Vv13g0103          | Tc10_g001110       | .                  | .                  | .                  | .      | . |
| Gorai.012G078400.1 | .                  | .                  | .                  | .                  | .      | . |
| .                  | .                  | .                  | .                  | .                  | .      | . |
| Vv13g0104          | Tc10_g001100       | .                  | Gorai.011G291100.1 | .                  | .      | . |
| .                  | .                  | .                  | .                  | .                  | .      | . |
| .                  | .                  | .                  | .                  | .                  | .      | . |
| Vv13g0105          | Tc10_g001090       | .                  | .                  | .                  | Gorai. | . |
| 010G195700.1       | Gorai.012G078500.1 | .                  | .                  | .                  | .      | . |
| .                  | .                  | .                  | .                  | .                  | .      | . |
| .                  | .                  | .                  | .                  | .                  | .      | . |
| Vv13g0106          | .                  | .                  | .                  | .                  | .      | . |
| .                  | .                  | .                  | .                  | .                  | .      | . |
| .                  | .                  | .                  | .                  | .                  | .      | . |
| Vv13g0107          | .                  | .                  | .                  | .                  | .      | . |
| .                  | .                  | .                  | .                  | .                  | .      | . |
| .                  | .                  | .                  | .                  | .                  | .      | . |
| Vv13g0108          | .                  | .                  | .                  | .                  | .      | . |
| .                  | .                  | .                  | .                  | .                  | .      | . |
| .                  | .                  | .                  | .                  | .                  | .      | . |
| Vv13g0109          | .                  | .                  | .                  | .                  | .      | . |
| .                  | .                  | .                  | .                  | .                  | .      | . |
| .                  | .                  | .                  | .                  | .                  | .      | . |
| Vv13g0110          | .                  | .                  | .                  | .                  | .      | . |
| .                  | .                  | .                  | .                  | .                  | .      | . |

|                    |                    |                    |           |                    |
|--------------------|--------------------|--------------------|-----------|--------------------|
| Vv13g0111          | Tc10_g001070       | Gorai.013G016800.1 | .         | .                  |
|                    | Gorai.010G195600.1 | .                  | Vv08g0366 | .                  |
| Tc05_g002240       | Gorai.006G183400.1 | .                  | .         | .                  |
| Vv13g0112          | Tc10_g001060       | .                  | .         | .                  |
| Gorai.012G078600.1 | .                  | .                  | .         | .                  |
| Vv13g0113          | Tc10_g001050       | .                  | .         | .                  |
| Gorai.012G078700.1 | .                  | .                  | .         | .                  |
| Vv13g0114          | Tc10_g001040       | .                  | .         | Gorai.             |
| 010G195500.1       | .                  | .                  | .         | .                  |
| Vv13g0115          | Tc10_g001030       | .                  | .         | Gorai.             |
| 010G195400.1       | Gorai.012G078800.1 | .                  | .         | .                  |
| .                  | .                  | .                  | .         | .                  |
| Vv13g0116          | .                  | .                  | .         | Vv06g0831          |
| .                  | .                  | .                  | .         | .                  |
| Vv13g0117          | Tc10_g001020       | .                  | .         | .                  |
| .                  | .                  | .                  | .         | .                  |
| Vv13g0118          | .                  | .                  | .         | .                  |
| .                  | .                  | .                  | .         | .                  |
| Vv13g0119          | Tc10_g001010       | .                  | .         | Gorai.             |
| 010G195300.1       | Gorai.012G079000.1 | .                  | .         | .                  |
| .                  | .                  | .                  | .         | .                  |
| Vv13g0120          | .                  | .                  | .         | .                  |
| .                  | .                  | .                  | .         | .                  |
| Vv13g0121          | .                  | .                  | .         | .                  |
| .                  | .                  | .                  | .         | .                  |
| Vv13g0122          | .                  | .                  | .         | .                  |
| .                  | .                  | .                  | .         | .                  |
| Vv13g0123          | Tc10_g001000       | .                  | .         | Gorai.009G322800.1 |
| .                  | Gorai.012G079300.1 | .                  | .         | .                  |
| .                  | .                  | Vv06g0839          | .         | .                  |
| Vv13g0124          | .                  | .                  | .         | .                  |
| .                  | .                  | .                  | .         | .                  |
| Vv13g0125          | Tc10_g000990       | .                  | .         | Gorai.011G291500.1 |
|                    | Gorai.010G195100.1 | .                  | .         | .                  |
| .                  | .                  | Vv06g0844          | .         | .                  |

|                    |                    |   |              |                    |        |
|--------------------|--------------------|---|--------------|--------------------|--------|
| Vv13g0126          | Tc10_g000970       | . | .            | .                  | .      |
| Gorai.012G079500.1 | .                  | . | .            | .                  | .      |
| Vv13g0127          | Tc10_g000960       | . | .            | .                  | .      |
| Gorai.012G079600.1 | .                  | . | .            | .                  | .      |
| Vv13g0128          | .                  | . | .            | .                  | .      |
| .                  | .                  | . | .            | .                  | .      |
| Vv13g0129          | Tc10_g000950       | . | .            | .                  | .      |
| .                  | .                  | . | .            | .                  | .      |
| Vv13g0130          | Tc10_g000890       | . | .            | .                  | Gorai. |
| 010G195000.1       | Vv08g0368          | . | Tc05_g002230 | .                  | .      |
| .                  | Gorai.012G115400.1 | . | .            | .                  | .      |
| Vv13g0131          | Tc10_g000870       | . | .            | Gorai.009G323000.1 | .      |
| Gorai.010G194800.1 | .                  | . | .            | .                  | .      |
| .                  | .                  | . | .            | .                  | .      |
| Vv13g0132          | Tc10_g000860       | . | .            | .                  | Gorai. |
| 010G194700.1       | .                  | . | .            | .                  | .      |
| Vv13g0133          | .                  | . | .            | .                  | .      |
| .                  | .                  | . | .            | .                  | .      |
| Vv13g0134          | .                  | . | .            | .                  | .      |
| .                  | .                  | . | .            | .                  | .      |
| Vv13g0135          | Tc10_g000830       | . | .            | .                  | Gorai. |
| 010G194300.1       | .                  | . | .            | .                  | .      |
| Vv13g0136          | .                  | . | .            | .                  | .      |
| .                  | .                  | . | .            | .                  | .      |
| Vv13g0137          | .                  | . | .            | .                  | .      |
| Vv06g0868          | .                  | . | .            | .                  | Gorai. |
| 003G150300.1       | .                  | . | .            | .                  | .      |
| Vv13g0138          | Tc10_g000820       | . | .            | .                  | Gorai. |
| 010G194100.1       | .                  | . | .            | .                  | .      |
| Vv13g0139          | Tc10_g000810       | . | .            | .                  | Gorai. |
| 010G193900.1       | .                  | . | .            | .                  | .      |
| Vv13g0140          | .                  | . | .            | .                  | .      |
| .                  | .                  | . | .            | .                  | .      |
| Vv13g0141          | Tc10_g000800       | . | .            | .                  | Gorai. |
| 010G193800.1       | .                  | . | .            | .                  | .      |

|           |                    |                    |                    |   |
|-----------|--------------------|--------------------|--------------------|---|
| Vv13g0142 | Tc10_g000790       | Gorai.013G016600.1 | .                  | . |
|           | Gorai.010G193700.1 | .                  | .                  | . |
| .         | .                  | .                  | .                  | . |
| Vv13g0143 | .                  | .                  | .                  | . |
| .         | .                  | .                  | .                  | . |
| Vv13g0144 | .                  | .                  | .                  | . |
| .         | .                  | .                  | .                  | . |
| Vv13g0145 | .                  | Gorai.013G014500.1 | .                  | . |
| .         | .                  | .                  | .                  | . |
| Vv13g0146 | .                  | .                  | .                  | . |
| .         | .                  | .                  | .                  | . |
| Vv13g0147 | .                  | .                  | .                  | . |
| .         | .                  | .                  | .                  | . |
| Vv13g0148 | .                  | .                  | .                  | . |
| .         | .                  | .                  | .                  | . |
| Vv13g0149 | .                  | .                  | .                  | . |
| .         | .                  | .                  | .                  | . |
| Vv13g0150 | Tc10_g000740       | .                  | .                  | . |
| .         | .                  | .                  | .                  | . |
| Vv13g0151 | .                  | .                  | .                  | . |
| .         | .                  | .                  | .                  | . |
| Vv13g0152 | .                  | .                  | .                  | . |
| .         | .                  | .                  | .                  | . |
| Vv13g0153 | Tc10_g000730       | Gorai.011G292600.1 | .                  | . |
|           | Gorai.010G193300.1 | .                  | .                  | . |
| .         | .                  | .                  | .                  | . |
| Vv13g0154 | .                  | .                  | .                  | . |
| .         | .                  | .                  | .                  | . |
| Vv13g0155 | .                  | .                  | Gorai.010G193200.1 | . |
| .         | .                  | .                  | .                  | . |
| Vv13g0156 | .                  | .                  | .                  | . |
| .         | .                  | .                  | .                  | . |
| Vv13g0157 | .                  | .                  | .                  | . |
| .         | .                  | .                  | .                  | . |



|                    |                    |                    |                    |   |        |
|--------------------|--------------------|--------------------|--------------------|---|--------|
| Vv13g0158          | Tc10_g000660       | .                  | .                  | . | Gorai. |
| 010G192900.1       | .                  | .                  | .                  | . | .      |
| Vv13g0159          | .                  | .                  | .                  | . | .      |
| .                  | .                  | .                  | .                  | . | .      |
| Vv13g0160          | Tc10_g000640       | .                  | .                  | . | Gorai. |
| 010G192600.1       | Gorai.012G079900.1 | .                  | .                  | . | .      |
| .                  | .                  | .                  | .                  | . | .      |
| Vv13g0161          | Tc10_g000610       | .                  | .                  | . | .      |
| Gorai.012G080100.1 | .                  | .                  | .                  | . | .      |
| Vv13g0162          | .                  | Gorai.011G293300.1 | .                  | . | .      |
| .                  | .                  | .                  | .                  | . | .      |
| Vv13g0163          | .                  | .                  | .                  | . | .      |
| .                  | .                  | .                  | .                  | . | .      |
| Vv13g0164          | .                  | .                  | .                  | . | .      |
| Vv06g0899          | .                  | .                  | .                  | . | .      |
| Vv13g0165          | .                  | .                  | .                  | . | Gorai. |
| 012G016300.1       | .                  | .                  | .                  | . | .      |
| Vv13g0166          | .                  | Gorai.011G211500.1 | .                  | . | .      |
| .                  | .                  | .                  | .                  | . | .      |
| Vv13g0167          | .                  | .                  | .                  | . | .      |
| .                  | .                  | .                  | .                  | . | .      |
| Vv13g0168          | .                  | .                  | .                  | . | .      |
| .                  | .                  | .                  | .                  | . | .      |
| Vv13g0169          | Tc10_g016040       | .                  | Gorai.011G211400.1 | . | .      |
| .                  | .                  | .                  | .                  | . | .      |
| Vv13g0170          | .                  | .                  | .                  | . | .      |
| Vv06g0908          | Tc09_g004920       | .                  | .                  | . | .      |
| Vv13g0171          | .                  | Gorai.011G210600.1 | .                  | . | .      |
| Gorai.010G217900.1 | Gorai.012G015700.1 | .                  | .                  | . | .      |
| .                  | .                  | .                  | .                  | . | .      |
| Vv13g0172          | .                  | .                  | .                  | . | .      |
| .                  | .                  | .                  | .                  | . | .      |
| Vv13g0173          | .                  | .                  | .                  | . | .      |
| .                  | .                  | .                  | .                  | . | .      |

|                    |           |                    |                    |   |   |        |   |
|--------------------|-----------|--------------------|--------------------|---|---|--------|---|
| Vv13g0174          | .         | .                  | .                  | . | . | .      | . |
| .                  | .         | .                  | .                  | . | . | .      | . |
| Vv13g0175          | .         | .                  | .                  | . | . | .      | . |
| .                  | .         | .                  | .                  | . | . | .      | . |
| Vv13g0176          | .         | .                  | .                  | . | . | .      | . |
| .                  | .         | .                  | .                  | . | . | .      | . |
| Vv13g0177          | .         | .                  | .                  | . | . | .      | . |
| .                  | .         | .                  | .                  | . | . | .      | . |
| Vv13g0178          | .         | .                  | .                  | . | . | .      | . |
| .                  | .         | .                  | .                  | . | . | .      | . |
| Vv13g0179          | .         | .                  | Gorai.011G210200.1 | . | . | .      | . |
| Gorai.012G015500.1 | .         | .                  | .                  | . | . | .      | . |
| .                  | .         | .                  | .                  | . | . | .      | . |
| Vv13g0180          | .         | .                  | .                  | . | . | .      | . |
| .                  | .         | .                  | .                  | . | . | .      | . |
| Vv13g0181          | .         | .                  | Gorai.011G210100.1 | . | . | .      | . |
| .                  | .         | .                  | .                  | . | . | .      | . |
| Vv13g0182          | .         | Gorai.013G008100.1 | .                  | . | . | .      | . |
| .                  | .         | .                  | .                  | . | . | .      | . |
| Vv13g0183          | .         | .                  | .                  | . | . | .      | . |
| .                  | .         | .                  | .                  | . | . | .      | . |
| Vv13g0184          | .         | .                  | .                  | . | . | Gorai. | . |
| 012G082500.1       | .         | .                  | .                  | . | . | .      | . |
| .                  | .         | .                  | .                  | . | . | .      | . |
| Vv13g0185          | .         | .                  | .                  | . | . | .      | . |
| .                  | .         | .                  | .                  | . | . | .      | . |
| Vv13g0186          | .         | .                  | .                  | . | . | .      | . |
| .                  | .         | .                  | .                  | . | . | .      | . |
| Vv13g0187          | .         | .                  | .                  | . | . | .      | . |
| Vv06g0923          | .         | .                  | .                  | . | . | .      | . |
| .                  | .         | .                  | .                  | . | . | .      | . |
| Vv13g0188          | .         | .                  | .                  | . | . | .      | . |
| .                  | .         | .                  | .                  | . | . | .      | . |
| Vv13g0189          | .         | Gorai.013G007300.1 | .                  | . | . | .      | . |
| .                  | Vv06g0924 | .                  | .                  | . | . | .      | . |
| .                  | .         | .                  | .                  | . | . | .      | . |

|              |                    |                    |   |        |   |
|--------------|--------------------|--------------------|---|--------|---|
| Vv13g0190    | .                  | Gorai.013G006900.1 | . | .      | . |
|              | Gorai.012G014700.1 | .                  | . | .      | . |
| .            | .                  | .                  | . | .      | . |
| Vv13g0191    | Tc10_g016160       | .                  | . | .      | . |
| .            | .                  | .                  | . | .      | . |
| Vv13g0192    | Tc10_g016170       | .                  | . | .      | . |
| .            | .                  | .                  | . | .      | . |
| Vv13g0193    | Tc10_g016240       | .                  | . | .      | . |
| .            | .                  | .                  | . | .      | . |
| Vv13g0194    | .                  | .                  | . | .      | . |
| .            | .                  | .                  | . | .      | . |
| Vv13g0195    | .                  | .                  | . | .      | . |
| .            | .                  | .                  | . | .      | . |
| Vv13g0196    | .                  | .                  | . | .      | . |
| .            | .                  | .                  | . | .      | . |
| Vv13g0197    | .                  | .                  | . | .      | . |
| .            | .                  | .                  | . | .      | . |
| Vv13g0198    | .                  | .                  | . | .      | . |
| .            | .                  | .                  | . | .      | . |
| Vv13g0199    | .                  | .                  | . | .      | . |
| .            | .                  | .                  | . | .      | . |
| Vv13g0200    | .                  | .                  | . | .      | . |
| .            | .                  | .                  | . | .      | . |
| Vv13g0201    | .                  | .                  | . | .      | . |
| .            | .                  | .                  | . | .      | . |
| Vv13g0202    | .                  | .                  | . | .      | . |
| .            | .                  | .                  | . | .      | . |
| Vv13g0203    | .                  | .                  | . | .      | . |
| .            | .                  | .                  | . | .      | . |
| Vv13g0204    | Tc10_g016280       | .                  | . | Gorai. | . |
| 010G218500.1 | .                  | .                  | . | .      | . |
| .            | .                  | .                  | . | .      | . |
| Vv13g0205    | .                  | .                  | . | .      | . |
| .            | .                  | .                  | . | .      | . |
| Vv13g0206    | Tc10_g016290       | .                  | . | .      | . |

|                    |                    |                    |                    |   |   |   |
|--------------------|--------------------|--------------------|--------------------|---|---|---|
| Gorai.012G014600.1 | .                  | .                  | .                  | . | . | . |
| Vv13g0207          | Tc10_g016300       | .                  | Gorai.011G209400.1 | . | . | . |
|                    | Gorai.010G218600.1 | .                  | .                  | . | . | . |
| .                  | .                  | .                  | .                  | . | . | . |
| Vv13g0208          | Tc10_g016310       | .                  | Gorai.011G209200.1 | . | . | . |
|                    | Gorai.010G218700.1 | Gorai.012G014500.1 | .                  | . | . | . |
| .                  | .                  | .                  | .                  | . | . | . |
| Vv13g0209          | Tc10_g016320       | .                  | .                  | . | . | . |
| .                  | .                  | .                  | .                  | . | . | . |
| Vv13g0210          | .                  | .                  | .                  | . | . | . |
| .                  | .                  | .                  | .                  | . | . | . |
| Vv13g0211          | Tc10_g016330       | Gorai.013G007000.1 | Gorai.             | . | . | . |
| 011G209100.1       | .                  | Gorai.012G014400.1 | .                  | . | . | . |
| .                  | .                  | .                  | .                  | . | . | . |
| Vv13g0212          | Tc10_g016390       | Gorai.013G007200.1 | Gorai.             | . | . | . |
| 011G208100.1       | .                  | .                  | .                  | . | . | . |
| .                  | .                  | .                  | .                  | . | . | . |
| Vv13g0213          | Tc10_g016400       | .                  | Gorai.011G208000.1 | . | . | . |
| .                  | .                  | .                  | .                  | . | . | . |
| Vv13g0214          | .                  | .                  | .                  | . | . | . |
| .                  | .                  | .                  | .                  | . | . | . |
| Vv13g0215          | .                  | .                  | .                  | . | . | . |
| .                  | .                  | .                  | .                  | . | . | . |
| Vv13g0216          | Tc10_g016410       | .                  | .                  | . | . | . |
| .                  | .                  | .                  | .                  | . | . | . |
| Vv13g0217          | Tc10_g016420       | .                  | Gorai.011G207900.1 | . | . | . |
| .                  | Vv06g0925          | .                  | .                  | . | . | . |
| .                  | .                  | .                  | .                  | . | . | . |
| Vv13g0218          | .                  | .                  | .                  | . | . | . |
| .                  | .                  | .                  | .                  | . | . | . |
| Vv13g0219          | .                  | .                  | .                  | . | . | . |
| .                  | .                  | .                  | .                  | . | . | . |
| Vv13g0220          | .                  | Gorai.013G006800.1 | .                  | . | . | . |
| .                  | .                  | .                  | .                  | . | . | . |
| Vv13g0221          | .                  | .                  | .                  | . | . | . |

|                    |                    |                    |                    |   |   |        |   |
|--------------------|--------------------|--------------------|--------------------|---|---|--------|---|
| .                  | .                  | .                  | .                  | . | . | .      | . |
| .                  | .                  | .                  | .                  | . | . | .      | . |
| Vv13g0222          | .                  | .                  | .                  | . | . | .      | . |
| .                  | .                  | .                  | .                  | . | . | .      | . |
| Vv13g0223          | .                  | .                  | .                  | . | . | .      | . |
| .                  | .                  | .                  | .                  | . | . | .      | . |
| Vv13g0224          | Tc10_g014960       | Gorai.013G004700.1 | .                  | . | . | .      | . |
| .                  | Gorai.012G017600.1 | Vv08g0899          | .                  | . | . | .      | . |
| Tc05_g026640       | .                  | .                  | .                  | . | . | .      | . |
| .                  | .                  | .                  | .                  | . | . | .      | . |
| Vv13g0225          | .                  | .                  | .                  | . | . | .      | . |
| .                  | .                  | .                  | .                  | . | . | .      | . |
| Vv13g0226          | .                  | .                  | .                  | . | . | Gorai. | . |
| 012G066600.1       | .                  | .                  | .                  | . | . | .      | . |
| .                  | .                  | .                  | .                  | . | . | .      | . |
| Vv13g0227          | .                  | .                  | .                  | . | . | .      | . |
| .                  | .                  | .                  | .                  | . | . | .      | . |
| Vv13g0228          | .                  | Gorai.013G002900.1 | .                  | . | . | .      | . |
| .                  | Vv08g0873          | .                  | .                  | . | . | .      | . |
| .                  | .                  | .                  | .                  | . | . | .      | . |
| Vv13g0229          | .                  | .                  | .                  | . | . | .      | . |
| .                  | .                  | .                  | .                  | . | . | .      | . |
| Vv13g0230          | Tc10_g016530       | .                  | .                  | . | . | Gorai. | . |
| 010G219100.1       | .                  | .                  | .                  | . | . | .      | . |
| .                  | .                  | .                  | .                  | . | . | .      | . |
| Vv13g0231          | Tc10_g016560       | .                  | .                  | . | . | .      | . |
| Gorai.012G014000.1 | .                  | .                  | .                  | . | . | .      | . |
| .                  | .                  | .                  | .                  | . | . | .      | . |
| Vv13g0232          | Tc10_g016570       | Gorai.013G008300.1 | .                  | . | . | .      | . |
| .                  | Gorai.010G219200.1 | Gorai.012G013900.1 | .                  | . | . | .      | . |
| .                  | .                  | .                  | .                  | . | . | .      | . |
| Vv13g0233          | Tc10_g016580       | .                  | Gorai.011G206700.1 | . | . | .      | . |
| .                  | .                  | .                  | .                  | . | . | .      | . |
| Vv13g0234          | Tc10_g016590       | Gorai.013G008400.1 | .                  | . | . | .      | . |
| .                  | .                  | .                  | .                  | . | . | .      | . |
| Vv13g0235          | Tc10_g016600       | .                  | .                  | . | . | .      | . |
| .                  | .                  | .                  | .                  | . | . | .      | . |
| Vv13g0236          | .                  | .                  | .                  | . | . | .      | . |
| .                  | .                  | .                  | .                  | . | . | .      | . |
| Vv13g0237          | Tc10_g015000       | .                  | Gorai.011G206500.1 | . | . | .      | . |

|              |                    |                    |        |  |  |
|--------------|--------------------|--------------------|--------|--|--|
| Vv13g0238    | Tc10_g016620       |                    |        |  |  |
| Vv13g0239    | Gorai.012G013600.1 | Gorai.011G240500.1 |        |  |  |
| Vv13g0240    | Tc10_g016640       |                    |        |  |  |
| Vv13g0241    | Tc10_g016650       | Gorai.013G008500.1 | Gorai. |  |  |
| 011G206300.1 |                    | Gorai.012G013500.1 |        |  |  |
| Vv13g0242    | Tc10_g016660       | Gorai.013G008700.1 |        |  |  |
|              | Vv06g0943          |                    |        |  |  |
| Vv13g0243    | Tc10_g016670       | Gorai.011G203600.1 |        |  |  |
| Vv13g0244    |                    |                    |        |  |  |
| Vv13g0245    | Tc10_g016690       |                    |        |  |  |
| Vv13g0246    | Tc10_g004690       | Gorai.009G315800.1 |        |  |  |
| Vv13g0247    | Tc10_g004680       | Gorai.013G024500.1 |        |  |  |
| Vv13g0248    |                    |                    |        |  |  |
| Vv13g0249    | Tc10_g004670       | Gorai.011G241800.1 |        |  |  |
|              | Gorai.012G010900.1 |                    |        |  |  |
| Vv13g0250    |                    |                    |        |  |  |
| Vv13g0251    | Tc10_g004660       | Gorai.011G241900.1 |        |  |  |
| Vv13g0252    | Tc10_g004650       |                    |        |  |  |

|                    |                    |                    |                    |        |        |
|--------------------|--------------------|--------------------|--------------------|--------|--------|
| Vv06g0429          | Tc09_g032930       | .                  | .                  | .      | Gorai. |
| 009G103700.1       | .                  | .                  | .                  | .      | .      |
| Vv13g0253          | Tc10_g004640       | .                  | .                  | .      | Gorai. |
| 010G203600.1       | .                  | .                  | .                  | .      | .      |
| .                  | .                  | .                  | .                  | .      | .      |
| Vv13g0254          | Tc10_g004630       | .                  | Gorai.011G242000.1 | .      | .      |
| Gorai.009G315900.1 | .                  | .                  | .                  | .      | .      |
| .                  | .                  | .                  | .                  | .      | .      |
| .                  | .                  | .                  | .                  | .      | .      |
| Vv13g0255          | Tc10_g004610       | Gorai.013G024400.1 | .                  | Gorai. | .      |
| 011G242200.1       | Gorai.009G316000.1 | .                  | .                  | .      | .      |
| .                  | .                  | .                  | .                  | .      | .      |
| .                  | .                  | .                  | .                  | .      | .      |
| Vv13g0256          | Tc10_g004590       | Gorai.013G024300.1 | .                  | .      | .      |
| .                  | .                  | .                  | .                  | .      | .      |
| .                  | .                  | .                  | .                  | .      | .      |
| Vv13g0257          | .                  | .                  | .                  | .      | .      |
| .                  | .                  | .                  | .                  | .      | .      |
| .                  | .                  | .                  | .                  | .      | .      |
| Vv13g0258          | Tc10_g004580       | Gorai.013G024200.1 | .                  | .      | .      |
| .                  | .                  | .                  | .                  | .      | .      |
| .                  | Vv06g0432          | .                  | .                  | .      | .      |
| .                  | .                  | .                  | .                  | .      | .      |
| Vv13g0259          | .                  | .                  | .                  | .      | .      |
| .                  | .                  | .                  | .                  | .      | .      |
| .                  | .                  | .                  | .                  | .      | .      |
| Vv13g0260          | Tc10_g004570       | .                  | Gorai.011G242300.1 | .      | .      |
| Gorai.010G203500.1 | .                  | .                  | Vv08g0886          | .      | .      |
| .                  | Gorai.012G100800.1 | .                  | .                  | .      | .      |
| .                  | .                  | .                  | .                  | .      | .      |
| Vv13g0261          | Tc10_g004560       | .                  | Gorai.011G242400.1 | .      | .      |
| .                  | .                  | .                  | .                  | .      | .      |
| .                  | .                  | .                  | .                  | .      | .      |
| Vv13g0262          | Tc10_g004540       | .                  | Gorai.011G242500.1 | .      | .      |
| Gorai.010G203400.1 | .                  | .                  | .                  | .      | .      |
| .                  | .                  | .                  | .                  | .      | .      |
| .                  | .                  | .                  | .                  | .      | .      |
| Vv13g0263          | Tc10_g004530       | .                  | Gorai.011G242600.1 | .      | .      |
| .                  | .                  | .                  | .                  | .      | .      |
| .                  | .                  | .                  | .                  | .      | .      |
| Vv13g0264          | .                  | Gorai.013G024100.1 | Gorai.011G242700.1 | .      | .      |
| .                  | Gorai.010G203100.1 | .                  | .                  | .      | .      |
| .                  | .                  | .                  | .                  | .      | .      |
| .                  | .                  | .                  | .                  | .      | .      |
| Vv13g0265          | .                  | .                  | .                  | .      | .      |
| .                  | .                  | .                  | .                  | .      | .      |
| .                  | .                  | .                  | .                  | .      | .      |
| Vv13g0266          | .                  | .                  | .                  | .      | .      |
| .                  | .                  | .                  | .                  | .      | .      |
| .                  | .                  | .                  | .                  | .      | .      |

|                    |                    |                    |                    |   |           |        |
|--------------------|--------------------|--------------------|--------------------|---|-----------|--------|
| Vv13g0267          | .                  | .                  | .                  | . | .         | Gorai. |
| 012G066900.1       | .                  | .                  | .                  | . | .         | .      |
| Vv13g0268          | .                  | .                  | .                  | . | .         | .      |
| Vv13g0269          | Tc10_g004500       | .                  | Gorai.011G242800.1 | . | .         | .      |
| Vv13g0270          | .                  | .                  | .                  | . | .         | .      |
| Vv13g0271          | Tc10_g004440       | Gorai.013G023900.1 | .                  | . | .         | .      |
|                    | Gorai.012G067300.1 | .                  | .                  | . | .         | .      |
| Vv13g0272          | Tc10_g004430       | Gorai.011G244700.1 | .                  | . | .         | .      |
|                    | Gorai.010G203000.1 | .                  | .                  | . | .         | .      |
| Vv13g0273          | Tc10_g004420       | .                  | .                  | . | .         | .      |
| Gorai.012G067400.1 | .                  | .                  | .                  | . | .         | .      |
| Vv13g0274          | .                  | .                  | .                  | . | .         | .      |
| Vv13g0275          | Tc10_g004410       | .                  | .                  | . | .         | .      |
| Vv13g0276          | .                  | .                  | .                  | . | .         | .      |
| Vv13g0277          | .                  | .                  | .                  | . | .         | .      |
| Vv13g0278          | .                  | .                  | .                  | . | .         | .      |
|                    | Tc09_g032510       | .                  | Gorai.009G102800.1 | . | Vv06g0456 | .      |
| Vv13g0279          | Tc10_g004370       | Gorai.013G023400.1 | .                  | . | .         | .      |
| Vv13g0280          | .                  | .                  | .                  | . | .         | .      |
| Vv13g0281          | .                  | Gorai.011G244900.1 | .                  | . | .         | .      |
|                    | Gorai.012G067500.1 | .                  | .                  | . | .         | .      |
| Vv13g0282          | .                  | Gorai.011G245000.1 | Gorai.             | . | .         | .      |



|                    |                    |                    |                    |                    |   |
|--------------------|--------------------|--------------------|--------------------|--------------------|---|
| 009G316400.1       | .                  | Gorai.012G067600.1 | .                  | .                  | . |
| .                  | .                  | .                  | .                  | .                  | . |
| .                  | .                  | .                  | .                  | .                  | . |
| Vv13g0283          | Tc10_g004310       | .                  | .                  | Gorai.             | . |
| 010G202900.1       | Gorai.012G067700.1 | .                  | .                  | .                  | . |
| .                  | .                  | .                  | .                  | .                  | . |
| .                  | .                  | .                  | .                  | .                  | . |
| Vv13g0284          | .                  | Gorai.011G245100.1 | .                  | .                  | . |
| .                  | .                  | .                  | .                  | .                  | . |
| .                  | .                  | .                  | .                  | .                  | . |
| Vv13g0285          | .                  | .                  | .                  | Gorai.010G202800.1 | . |
| .                  | .                  | .                  | .                  | .                  | . |
| .                  | .                  | .                  | .                  | .                  | . |
| Vv06g0463          | Tc09_g032420       | .                  | .                  | Gorai.001G107300.1 | . |
| .                  | Gorai.009G102300.1 | .                  | .                  | .                  | . |
| Vv13g0286          | .                  | .                  | .                  | .                  | . |
| .                  | .                  | .                  | .                  | .                  | . |
| .                  | .                  | .                  | .                  | .                  | . |
| Vv13g0287          | .                  | .                  | Gorai.009G316600.1 | .                  | . |
| .                  | .                  | .                  | .                  | .                  | . |
| .                  | .                  | .                  | .                  | .                  | . |
| Vv06g0465          | Tc09_g032410       | .                  | .                  | Gorai.001G107400.1 | . |
| .                  | Gorai.009G102200.1 | .                  | Gorai.003G137500.1 | .                  | . |
| Vv13g0288          | .                  | Gorai.011G245300.1 | .                  | Gorai.             | . |
| 009G316700.1       | .                  | .                  | .                  | .                  | . |
| .                  | .                  | .                  | .                  | .                  | . |
| .                  | .                  | .                  | .                  | .                  | . |
| Vv13g0289          | .                  | Gorai.011G245500.1 | .                  | .                  | . |
| Gorai.010G202700.1 | .                  | .                  | .                  | .                  | . |
| .                  | .                  | .                  | .                  | .                  | . |
| .                  | .                  | .                  | .                  | .                  | . |
| Vv13g0290          | .                  | Gorai.011G245700.1 | .                  | .                  | . |
| .                  | Gorai.012G068000.1 | .                  | .                  | .                  | . |
| .                  | .                  | .                  | .                  | .                  | . |
| .                  | .                  | .                  | .                  | .                  | . |
| Vv13g0291          | Tc10_g000510       | .                  | Gorai.011G245900.1 | .                  | . |
| Gorai.009G316800.1 | .                  | .                  | .                  | .                  | . |
| .                  | .                  | .                  | .                  | .                  | . |
| .                  | .                  | .                  | .                  | .                  | . |
| Vv13g0292          | Tc10_g000500       | .                  | Gorai.011G246000.1 | .                  | . |
| .                  | .                  | .                  | .                  | .                  | . |
| .                  | .                  | .                  | .                  | .                  | . |
| .                  | Vv06g0468          | Tc09_g032380       | .                  | .                  | . |
| .                  | Gorai.003G137200.1 | .                  | .                  | .                  | . |
| Vv13g0293          | .                  | Gorai.011G246100.1 | .                  | Gorai.             | . |
| 009G316900.1       | .                  | .                  | .                  | .                  | . |
| .                  | .                  | .                  | .                  | .                  | . |
| .                  | .                  | .                  | .                  | .                  | . |
| Vv13g0294          | .                  | Gorai.011G246200.1 | .                  | .                  | . |
| .                  | Vv08g0891          | .                  | Gorai.006G177600.1 | .                  | . |
| Gorai.002G252300.1 | .                  | .                  | .                  | .                  | . |
| .                  | .                  | .                  | .                  | .                  | . |
| .                  | .                  | .                  | .                  | .                  | . |
| Vv13g0295          | .                  | .                  | .                  | Gorai.010G202600.1 | . |

|                           |                    |  |                    |  |        |  |  |
|---------------------------|--------------------|--|--------------------|--|--------|--|--|
| Vv13g0296                 |                    |  |                    |  |        |  |  |
| Vv13g0297                 |                    |  |                    |  |        |  |  |
| Vv13g0298                 |                    |  | Gorai.011G246300.1 |  |        |  |  |
| Vv13g0299<br>009G317000.1 |                    |  | Gorai.011G246400.1 |  | Gorai. |  |  |
| Vv13g0300                 |                    |  |                    |  |        |  |  |
| Vv13g0301                 |                    |  | Gorai.011G246500.1 |  |        |  |  |
| Vv13g0302                 |                    |  | Gorai.011G246600.1 |  |        |  |  |
|                           | Gorai.012G068100.1 |  |                    |  |        |  |  |
| Vv13g0303                 |                    |  | Gorai.011G247000.1 |  |        |  |  |
| Vv13g0304                 |                    |  |                    |  |        |  |  |
| Vv13g0305                 |                    |  |                    |  |        |  |  |
| Vv13g0306                 |                    |  |                    |  |        |  |  |
| Vv13g0307                 |                    |  |                    |  |        |  |  |
| Vv13g0308                 |                    |  |                    |  |        |  |  |
| Vv13g0309                 |                    |  |                    |  |        |  |  |
| Vv13g0310                 |                    |  | Gorai.011G247700.1 |  |        |  |  |
| Vv13g0311                 |                    |  |                    |  |        |  |  |

|                    |                    |                    |                    |                    |           |   |   |
|--------------------|--------------------|--------------------|--------------------|--------------------|-----------|---|---|
| .                  | .                  | .                  | .                  | .                  | .         | . | . |
| .                  | .                  | .                  | .                  | .                  | .         | . | . |
| Vv13g0312          | Tc10_g004240       | .                  | .                  | Gorai.009G317700.1 | .         | . | . |
| .                  | .                  | .                  | .                  | .                  | .         | . | . |
| .                  | .                  | .                  | .                  | .                  | .         | . | . |
| Vv13g0313          | Tc10_g004230       | .                  | .                  | Gorai.011G252900.1 | .         | . | . |
| .                  | Gorai.012G069000.1 | .                  | .                  | .                  | .         | . | . |
| .                  | .                  | .                  | .                  | .                  | .         | . | . |
| .                  | .                  | .                  | .                  | .                  | .         | . | . |
| Vv13g0314          | Tc10_g004220       | .                  | .                  | .                  | .         | . | . |
| Gorai.012G069100.1 | .                  | .                  | .                  | .                  | .         | . | . |
| .                  | .                  | .                  | .                  | .                  | .         | . | . |
| Vv13g0315          | Tc10_g004200       | .                  | .                  | Gorai.011G253100.1 | .         | . | . |
| .                  | .                  | .                  | .                  | .                  | .         | . | . |
| .                  | Vv06g0479          | Tc09_g032280       | .                  | Gorai.013G265400.1 | .         | . | . |
| .                  | Gorai.009G101700.1 | .                  | .                  | Gorai.003G136600.1 | .         | . | . |
| Vv13g0316          | .                  | .                  | .                  | .                  | .         | . | . |
| .                  | .                  | .                  | .                  | .                  | .         | . | . |
| .                  | .                  | .                  | .                  | .                  | .         | . | . |
| Vv13g0317          | Tc10_g003910       | .                  | .                  | Gorai.011G253200.1 | .         | . | . |
| Gorai.009G317800.1 | .                  | .                  | .                  | .                  | .         | . | . |
| .                  | .                  | .                  | .                  | .                  | .         | . | . |
| .                  | .                  | .                  | .                  | .                  | .         | . | . |
| Vv13g0318          | .                  | .                  | .                  | .                  | .         | . | . |
| .                  | .                  | .                  | .                  | .                  | .         | . | . |
| .                  | .                  | .                  | .                  | .                  | .         | . | . |
| Vv13g0319          | .                  | .                  | .                  | .                  | .         | . | . |
| .                  | .                  | .                  | .                  | .                  | .         | . | . |
| .                  | .                  | .                  | .                  | .                  | .         | . | . |
| Vv13g0320          | .                  | .                  | .                  | .                  | .         | . | . |
| .                  | .                  | .                  | .                  | .                  | .         | . | . |
| .                  | .                  | .                  | .                  | .                  | .         | . | . |
| Vv13g0321          | .                  | .                  | .                  | .                  | .         | . | . |
| .                  | .                  | .                  | .                  | .                  | .         | . | . |
| .                  | .                  | .                  | .                  | .                  | .         | . | . |
| Vv13g0322          | .                  | .                  | Gorai.011G253900.1 | .                  | .         | . | . |
| .                  | .                  | .                  | .                  | .                  | .         | . | . |
| .                  | .                  | .                  | .                  | .                  | .         | . | . |
| Vv13g0323          | Tc10_g003860       | .                  | .                  | Gorai.011G254000.1 | .         | . | . |
| .                  | .                  | .                  | .                  | .                  | .         | . | . |
| .                  | Vv06g0483          | Tc09_g032240       | .                  | Gorai.             | .         | . | . |
| 001G108000.1       | Gorai.009G101600.1 | .                  | .                  | Gorai.003G136300.1 | .         | . | . |
| Vv13g0324          | .                  | .                  | .                  | .                  | .         | . | . |
| .                  | .                  | .                  | .                  | .                  | Vv06g0484 | . | . |
| .                  | .                  | .                  | .                  | .                  | .         | . | . |
| Vv13g0325          | .                  | .                  | .                  | .                  | .         | . | . |
| .                  | .                  | .                  | .                  | .                  | .         | . | . |
| .                  | .                  | .                  | .                  | .                  | .         | . | . |
| Vv13g0326          | Tc10_g003850       | Gorai.013G023300.1 | .                  | Gorai.             | .         | . | . |
| 011G254300.1       | Gorai.010G202400.1 | .                  | .                  | .                  | .         | . | . |

|                    |                    |                    |                    |   |        |   |   |
|--------------------|--------------------|--------------------|--------------------|---|--------|---|---|
| .                  | .                  | .                  | .                  | . | .      | . | . |
| .                  | .                  | .                  | .                  | . | .      | . | . |
| Vv13g0327          | Tc10_g003840       | Gorai.013G023200.1 | .                  | . | .      | . | . |
| Gorai.009G318200.1 | .                  | .                  | Vv08g0923          | . | .      | . | . |
| Tc05_g005000       | Gorai.006G175000.1 | Gorai.002G254400.1 | .                  | . | .      | . | . |
| .                  | Vv06g0488          | Tc09_g032210       | .                  | . | .      | . | . |
| .                  | Gorai.009G101500.1 | .                  | .                  | . | .      | . | . |
| Vv13g0328          | Tc10_g003790       | .                  | .                  | . | .      | . | . |
| .                  | .                  | .                  | .                  | . | .      | . | . |
| .                  | .                  | .                  | .                  | . | .      | . | . |
| Vv13g0329          | Tc10_g003760       | Gorai.011G255300.1 | .                  | . | .      | . | . |
| .                  | Gorai.012G069500.1 | .                  | .                  | . | .      | . | . |
| .                  | .                  | .                  | .                  | . | .      | . | . |
| .                  | .                  | .                  | .                  | . | .      | . | . |
| Vv13g0330          | Tc10_g003730       | Gorai.013G023100.1 | Gorai.             | . | .      | . | . |
| 011G255400.1       | .                  | .                  | .                  | . | .      | . | . |
| .                  | .                  | .                  | .                  | . | .      | . | . |
| .                  | .                  | .                  | .                  | . | .      | . | . |
| Vv13g0331          | .                  | .                  | .                  | . | .      | . | . |
| .                  | .                  | .                  | .                  | . | .      | . | . |
| .                  | .                  | .                  | .                  | . | .      | . | . |
| Vv13g0332          | .                  | .                  | .                  | . | .      | . | . |
| .                  | .                  | .                  | .                  | . | .      | . | . |
| .                  | .                  | .                  | .                  | . | .      | . | . |
| Vv13g0333          | Tc10_g003700       | Gorai.013G022900.1 | .                  | . | .      | . | . |
| .                  | Gorai.012G069600.1 | Vv08g0925          | .                  | . | .      | . | . |
| Tc05_g004990       | .                  | Gorai.002G254800.1 | .                  | . | .      | . | . |
| Vv06g0496          | .                  | Tc09_g032130       | Gorai.013G264800.1 | . | .      | . | . |
| .                  | .                  | Gorai.003G135600.1 | .                  | . | .      | . | . |
| Vv13g0334          | .                  | .                  | .                  | . | .      | . | . |
| .                  | .                  | .                  | .                  | . | .      | . | . |
| .                  | .                  | .                  | .                  | . | .      | . | . |
| Vv13g0335          | .                  | .                  | .                  | . | .      | . | . |
| .                  | .                  | .                  | .                  | . | .      | . | . |
| .                  | .                  | .                  | .                  | . | .      | . | . |
| Vv13g0336          | .                  | .                  | .                  | . | .      | . | . |
| .                  | .                  | .                  | .                  | . | .      | . | . |
| .                  | .                  | .                  | .                  | . | .      | . | . |
| Vv13g0337          | .                  | .                  | .                  | . | .      | . | . |
| .                  | .                  | .                  | .                  | . | .      | . | . |
| .                  | .                  | .                  | .                  | . | .      | . | . |
| Vv13g0338          | Tc10_g003670       | .                  | .                  | . | .      | . | . |
| .                  | .                  | .                  | .                  | . | .      | . | . |
| .                  | .                  | .                  | .                  | . | .      | . | . |
| Vv13g0339          | .                  | .                  | .                  | . | .      | . | . |
| .                  | .                  | .                  | .                  | . | .      | . | . |
| .                  | .                  | .                  | .                  | . | .      | . | . |
| Vv13g0340          | .                  | .                  | .                  | . | Gorai. | . | . |
| 012G069700.1       | .                  | .                  | .                  | . | .      | . | . |
| .                  | .                  | .                  | .                  | . | .      | . | . |

|                    |                    |   |                    |                    |   |   |   |
|--------------------|--------------------|---|--------------------|--------------------|---|---|---|
| Vv13g0341          | .                  | . | .                  | .                  | . | . | . |
| .                  | .                  | . | .                  | .                  | . | . | . |
| Vv13g0342          | .                  | . | .                  | Gorai.009G318900.1 | . | . | . |
| .                  | .                  | . | .                  | .                  | . | . | . |
| Vv13g0343          | .                  | . | .                  | Gorai.011G255700.1 | . | . | . |
| .                  | .                  | . | .                  | .                  | . | . | . |
| Vv13g0344          | Tc10_g003640       | . | Gorai.013G022700.1 | .                  | . | . | . |
| .                  | .                  | . | .                  | .                  | . | . | . |
| .                  | Vv06g0506          | . | Tc09_g032060       | Gorai.013G264500.1 | . | . | . |
| .                  | .                  | . | Gorai.003G135000.1 | .                  | . | . | . |
| Vv13g0345          | .                  | . | .                  | .                  | . | . | . |
| .                  | .                  | . | .                  | .                  | . | . | . |
| Vv13g0346          | Tc10_g003630       | . | .                  | .                  | . | . | . |
| .                  | .                  | . | .                  | .                  | . | . | . |
| Vv06g0507          | Tc09_g032050       | . | Gorai.013G264400.1 | .                  | . | . | . |
| Gorai.004G004600.1 | .                  | . | Gorai.003G134900.1 | .                  | . | . | . |
| Vv13g0347          | .                  | . | .                  | .                  | . | . | . |
| Vv08g0934          | Tc05_g004880       | . | Gorai.002G255200.1 | .                  | . | . | . |
| Gorai.012G102800.1 | .                  | . | .                  | .                  | . | . | . |
| .                  | .                  | . | .                  | .                  | . | . | . |
| Vv13g0348          | Tc10_g003620       | . | .                  | .                  | . | . | . |
| .                  | .                  | . | .                  | .                  | . | . | . |
| Vv13g0349          | .                  | . | Gorai.011G256000.1 | .                  | . | . | . |
| .                  | .                  | . | .                  | .                  | . | . | . |
| Vv13g0350          | Tc10_g003610       | . | Gorai.011G256100.1 | .                  | . | . | . |
| .                  | Gorai.012G070000.1 | . | .                  | .                  | . | . | . |
| .                  | .                  | . | Vv06g0509          | Tc09_g032030       | . | . | . |
| .                  | .                  | . | Gorai.009G100900.1 | Gorai.003G134600.1 | . | . | . |
| Vv13g0351          | .                  | . | .                  | .                  | . | . | . |
| .                  | .                  | . | .                  | .                  | . | . | . |
| Vv13g0352          | .                  | . | .                  | .                  | . | . | . |
| .                  | .                  | . | .                  | .                  | . | . | . |
| Vv13g0353          | .                  | . | .                  | .                  | . | . | . |
| .                  | .                  | . | .                  | .                  | . | . | . |
| Vv13g0354          | .                  | . | .                  | .                  | . | . | . |
| .                  | .                  | . | .                  | .                  | . | . | . |
| Vv13g0355          | Tc10_g003590       | . | Gorai.011G256300.1 | .                  | . | . | . |
| .                  | .                  | . | .                  | .                  | . | . | . |
| .                  | .                  | . | .                  | .                  | . | . | . |
| Vv13g0356          | Tc10_g003480       | . | .                  | .                  | . | . | . |

|                    |                    |                    |                    |        |   |
|--------------------|--------------------|--------------------|--------------------|--------|---|
| Vv08g0943          | .                  | .                  | .                  | .      | . |
| Vv06g0513          | Tc09_g031990       | .                  | Gorai.013G264300.1 | .      | . |
| Gorai.001G108800.1 | .                  | Gorai.009G100700.1 | Gorai.             | .      | . |
| 003G134400.1       | .                  | .                  | .                  | .      | . |
| Vv13g0357          | Tc10_g003470       | .                  | Gorai.011G256600.1 | .      | . |
| .                  | Gorai.010G202100.1 | .                  | Vv08g0944          | .      | . |
| Tc05_g004790       | Gorai.006G174000.1 | .                  | Gorai.002G258500.1 | .      | . |
| .                  | Gorai.007G375600.1 | .                  | Vv06g0516          | .      | . |
| Tc09_g031960       | .                  | .                  | Gorai.009G100400.1 | .      | . |
| Gorai.003G133700.1 | .                  | .                  | .                  | .      | . |
| Vv13g0358          | Tc10_g003460       | .                  | Gorai.009G319000.1 | .      | . |
| .                  | Vv08g0945          | .                  | Tc05_g004780       | .      | . |
| Gorai.002G258400.1 | .                  | Gorai.012G103100.1 | .                  | .      | . |
| Vv06g0517          | Tc09_g031950       | .                  | .                  | Gorai. | . |
| 009G100300.1       | .                  | .                  | .                  | .      | . |
| Vv13g0359          | Tc10_g003450       | .                  | Gorai.011G256700.1 | .      | . |
| .                  | .                  | .                  | .                  | .      | . |
| .                  | .                  | .                  | .                  | .      | . |
| Vv13g0360          | Tc10_g003430       | Gorai.013G022600.1 | Gorai.             | .      | . |
| 011G256800.1       | Gorai.009G319200.1 | .                  | .                  | .      | . |
| .                  | .                  | .                  | Vv06g0519          | .      | . |
| Tc09_g031930       | Gorai.001G109100.1 | .                  | Gorai.             | .      | . |
| 009G100200.1       | Gorai.003G133600.1 | .                  | .                  | .      | . |
| Vv13g0361          | .                  | .                  | .                  | .      | . |
| .                  | .                  | .                  | .                  | .      | . |
| .                  | .                  | .                  | .                  | .      | . |
| Vv13g0362          | .                  | .                  | .                  | .      | . |
| .                  | .                  | .                  | .                  | .      | . |
| .                  | .                  | .                  | .                  | .      | . |
| Vv13g0363          | .                  | .                  | .                  | .      | . |
| .                  | .                  | .                  | .                  | .      | . |
| .                  | .                  | .                  | .                  | .      | . |
| Vv13g0364          | .                  | .                  | .                  | .      | . |
| .                  | .                  | .                  | .                  | .      | . |
| .                  | .                  | .                  | .                  | .      | . |
| Vv13g0365          | .                  | .                  | .                  | .      | . |
| .                  | .                  | .                  | .                  | .      | . |
| .                  | .                  | .                  | .                  | .      | . |
| Vv13g0366          | .                  | .                  | .                  | .      | . |
| .                  | .                  | .                  | .                  | .      | . |
| .                  | .                  | .                  | .                  | .      | . |
| Vv13g0367          | .                  | .                  | .                  | .      | . |
| .                  | .                  | .                  | .                  | .      | . |
| .                  | .                  | .                  | .                  | .      | . |
| Vv13g0368          | .                  | .                  | .                  | .      | . |
| .                  | .                  | .                  | .                  | .      | . |
| .                  | .                  | .                  | .                  | .      | . |
| Vv13g0369          | .                  | .                  | .                  | .      | . |
| .                  | .                  | .                  | .                  | .      | . |
| .                  | .                  | .                  | .                  | .      | . |

|                    |                    |                    |                    |   |        |   |   |
|--------------------|--------------------|--------------------|--------------------|---|--------|---|---|
| Vv13g0370          | .                  | .                  | .                  | . | .      | . | . |
| .                  | .                  | .                  | .                  | . | .      | . | . |
| Vv13g0371          | .                  | .                  | .                  | . | .      | . | . |
| .                  | .                  | .                  | .                  | . | .      | . | . |
| Vv13g0372          | .                  | .                  | .                  | . | .      | . | . |
| .                  | .                  | .                  | .                  | . | .      | . | . |
| Vv13g0373          | .                  | .                  | .                  | . | .      | . | . |
| .                  | .                  | .                  | .                  | . | .      | . | . |
| Vv13g0374          | Tc10_g003330       | .                  | .                  | . | .      | . | . |
| Gorai.012G070100.1 | .                  | .                  | .                  | . | .      | . | . |
| .                  | .                  | .                  | .                  | . | .      | . | . |
| Vv13g0375          | Tc10_g003320       | .                  | .                  | . | .      | . | . |
| Gorai.012G070200.1 | .                  | .                  | .                  | . | .      | . | . |
| .                  | .                  | .                  | .                  | . | .      | . | . |
| Vv13g0376          | .                  | .                  | .                  | . | .      | . | . |
| .                  | .                  | .                  | .                  | . | .      | . | . |
| Vv13g0377          | .                  | .                  | Gorai.011G259600.1 | . | .      | . | . |
| .                  | .                  | .                  | .                  | . | .      | . | . |
| Vv13g0378          | .                  | .                  | .                  | . | .      | . | . |
| .                  | .                  | .                  | .                  | . | .      | . | . |
| Vv13g0379          | .                  | .                  | Gorai.011G260000.1 | . | .      | . | . |
| .                  | .                  | .                  | .                  | . | .      | . | . |
| Vv13g0380          | .                  | .                  | .                  | . | .      | . | . |
| .                  | .                  | .                  | .                  | . | .      | . | . |
| Vv13g0381          | Gorai.013G022500.1 | .                  | Gorai.             | . | Gorai. | . | . |
| 009G319300.1       | .                  | Vv08g0949          | Tc05_g004730       | . | .      | . | . |
| Gorai.006G173700.1 | .                  | Gorai.012G103400.1 | .                  | . | .      | . | . |
| Vv06g0524          | Tc09_g031890       | .                  | Gorai.001G109300.1 | . | .      | . | . |
| Gorai.004G004800.1 | Gorai.009G100100.1 | .                  | Gorai.             | . | .      | . | . |
| 003G133200.1       | .                  | .                  | .                  | . | .      | . | . |
| Vv13g0382          | .                  | .                  | .                  | . | .      | . | . |
| .                  | .                  | .                  | .                  | . | .      | . | . |
| Vv13g0383          | .                  | .                  | .                  | . | .      | . | . |
| .                  | .                  | .                  | .                  | . | .      | . | . |
| Vv13g0384          | .                  | .                  | .                  | . | .      | . | . |
| .                  | .                  | .                  | .                  | . | .      | . | . |
| Vv13g0385          | .                  | .                  | .                  | . | .      | . | . |
| .                  | .                  | .                  | .                  | . | .      | . | . |

|                    |                    |                    |   |                    |   |                    |   |
|--------------------|--------------------|--------------------|---|--------------------|---|--------------------|---|
| Vv13g0386          | .                  | .                  | . | .                  | . | .                  | . |
| .                  | .                  | .                  | . | .                  | . | .                  | . |
| Vv13g0387          | Tc10_g003090       | .                  | . | Gorai.011G262500.1 | . | .                  | . |
| .                  | .                  | .                  | . | .                  | . | .                  | . |
| Vv13g0388          | Tc10_g003080       | .                  | . | .                  | . | Gorai.             | . |
| 010G201500.1       | .                  | .                  | . | .                  | . | .                  | . |
| Vv13g0389          | Tc10_g003070       | .                  | . | .                  | . | Gorai.009G319600.1 | . |
| .                  | Gorai.012G070900.1 | .                  | . | .                  | . | .                  | . |
| .                  | .                  | .                  | . | .                  | . | .                  | . |
| Vv13g0390          | .                  | .                  | . | .                  | . | .                  | . |
| .                  | .                  | .                  | . | .                  | . | .                  | . |
| Vv13g0391          | .                  | .                  | . | .                  | . | .                  | . |
| .                  | .                  | .                  | . | .                  | . | .                  | . |
| Vv13g0392          | Tc10_g003060       | .                  | . | Gorai.011G265400.1 | . | .                  | . |
| Gorai.010G201400.1 | .                  | .                  | . | Gorai.012G071000.1 | . | .                  | . |
| .                  | .                  | .                  | . | .                  | . | Vv06g0564          | . |
| Gorai.013G263400.1 | .                  | .                  | . | .                  | . | .                  | . |
| Vv13g0393          | .                  | .                  | . | .                  | . | .                  | . |
| .                  | .                  | .                  | . | .                  | . | .                  | . |
| Vv13g0394          | .                  | .                  | . | .                  | . | .                  | . |
| .                  | .                  | .                  | . | .                  | . | Vv06g0566          | . |
| .                  | .                  | .                  | . | .                  | . | .                  | . |
| Vv13g0395          | .                  | Gorai.013G022200.1 | . | Gorai.011G266000.1 | . | .                  | . |
| .                  | .                  | .                  | . | Vv08g0967          | . | Tc05_g004480       | . |
| Gorai.006G172400.1 | Gorai.002G257400.1 | .                  | . | Gorai.             | . | .                  | . |
| 012G104400.1       | Gorai.007G376300.1 | .                  | . | Vv06g0567          | . | .                  | . |
| Tc09_g031580       | Gorai.001G111100.1 | .                  | . | Gorai.             | . | .                  | . |
| 009G098800.1       | Gorai.003G131000.1 | .                  | . | .                  | . | .                  | . |
| Vv13g0396          | Gorai.013G021300.1 | .                  | . | Gorai.011G266100.1 | . | .                  | . |
| .                  | .                  | .                  | . | Vv08g0973          | . | Tc05_g004440       | . |
| .                  | .                  | .                  | . | .                  | . | .                  | . |
| Tc09_g031520       | .                  | .                  | . | Vv06g0576          | . | .                  | . |
| Gorai.003G130700.1 | .                  | .                  | . | Gorai.009G098300.1 | . | .                  | . |
| Vv13g0397          | Tc10_g000490       | .                  | . | .                  | . | .                  | . |
| .                  | .                  | .                  | . | .                  | . | .                  | . |
| .                  | .                  | .                  | . | .                  | . | .                  | . |
| Vv13g0398          | .                  | .                  | . | .                  | . | .                  | . |
| .                  | .                  | .                  | . | .                  | . | Vv06g0578          | . |
| Tc09_g031500       | .                  | .                  | . | Gorai.009G098200.1 | . | .                  | . |
| Gorai.003G130500.1 | .                  | .                  | . | .                  | . | .                  | . |
| Vv13g0399          | Gorai.013G018300.1 | .                  | . | Gorai.011G266200.1 | . | .                  | . |
| .                  | .                  | .                  | . | .                  | . | .                  | . |



|                    |                    |   |                    |   |   |           |   |
|--------------------|--------------------|---|--------------------|---|---|-----------|---|
| .                  | .                  | . | .                  | . | . | .         | . |
| .                  | .                  | . | .                  | . | . | .         | . |
| Vv13g0400          | .                  | . | .                  | . | . | .         | . |
|                    | Tc09_g031490       | . | Gorai.001G111600.1 | . | . | Vv06g0579 | . |
| .                  | .                  | . | .                  | . | . | .         | . |
| Vv13g0401          | .                  | . | .                  | . | . | .         | . |
| .                  | .                  | . | .                  | . | . | .         | . |
| .                  | .                  | . | .                  | . | . | .         | . |
| Vv13g0402          | .                  | . | .                  | . | . | .         | . |
| Vv08g0975          | Tc05_g004430       | . | .                  | . | . | .         | . |
| Gorai.007G376400.1 | Vv06g0580          | . | Tc09_g031480       | . | . | .         | . |
| .                  | Gorai.009G098100.1 | . | Gorai.003G130400.1 | . | . | .         | . |
| Vv13g0403          | .                  | . | .                  | . | . | .         | . |
| .                  | .                  | . | .                  | . | . | .         | . |
| .                  | .                  | . | .                  | . | . | .         | . |
| Vv13g0404          | .                  | . | Gorai.011G266300.1 | . | . | .         | . |
| .                  | .                  | . | .                  | . | . | .         | . |
| .                  | .                  | . | .                  | . | . | .         | . |
| Vv13g0405          | .                  | . | Gorai.011G266400.1 | . | . | Gorai.    | . |
| 009G319700.1       | .                  | . | .                  | . | . | .         | . |
| .                  | .                  | . | .                  | . | . | .         | . |
| .                  | .                  | . | .                  | . | . | .         | . |
| Vv13g0406          | .                  | . | .                  | . | . | .         | . |
| .                  | .                  | . | .                  | . | . | .         | . |
| .                  | .                  | . | .                  | . | . | .         | . |
| Vv13g0407          | .                  | . | .                  | . | . | .         | . |
| .                  | .                  | . | .                  | . | . | .         | . |
| .                  | .                  | . | .                  | . | . | .         | . |
| Vv13g0408          | .                  | . | .                  | . | . | .         | . |
| .                  | .                  | . | .                  | . | . | .         | . |
| .                  | .                  | . | .                  | . | . | .         | . |
| Vv13g0409          | Tc10_g000830       | . | .                  | . | . | .         | . |
| .                  | .                  | . | .                  | . | . | .         | . |
| .                  | .                  | . | .                  | . | . | .         | . |
| Vv13g0410          | .                  | . | .                  | . | . | .         | . |
| .                  | .                  | . | .                  | . | . | .         | . |
| .                  | .                  | . | .                  | . | . | .         | . |
| Vv13g0411          | .                  | . | .                  | . | . | .         | . |
| .                  | .                  | . | .                  | . | . | .         | . |
| .                  | .                  | . | .                  | . | . | .         | . |
| Vv13g0412          | Tc10_g002800       | . | Gorai.011G266800.1 | . | . | .         | . |
| .                  | .                  | . | .                  | . | . | .         | . |
| .                  | .                  | . | .                  | . | . | .         | . |
| Vv13g0413          | Tc10_g002790       | . | Gorai.011G266900.1 | . | . | .         | . |
|                    | Gorai.010G201200.1 | . | Vv08g0989          | . | . | .         | . |
| Tc05_g004300       | Gorai.006G171400.1 | . | .                  | . | . | .         | . |
| .                  | .                  | . | .                  | . | . | .         | . |
| Vv13g0414          | .                  | . | .                  | . | . | .         | . |
| .                  | .                  | . | .                  | . | . | .         | . |

|                    |                    |                    |                    |                    |   |           |
|--------------------|--------------------|--------------------|--------------------|--------------------|---|-----------|
| Vv13g0415          | .                  | .                  | .                  | Gorai.011G267200.1 | . | .         |
|                    | Gorai.012G071300.1 | .                  | .                  | .                  | . | .         |
| .                  | .                  | .                  | .                  | .                  | . | .         |
| Vv13g0416          | .                  | .                  | .                  | .                  | . | Vv06g0592 |
|                    | Tc09_g031320       | .                  | .                  | .                  | . | .         |
| Vv13g0417          | .                  | .                  | .                  | .                  | . | Vv06g0593 |
| .                  | .                  | .                  | .                  | .                  | . | .         |
|                    |                    | Gorai.001G112000.1 |                    | Gorai.004G005400.1 |   |           |
|                    | Gorai.009G097200.1 |                    | Gorai.003G129200.1 |                    |   |           |
| Vv13g0418          | .                  | .                  | .                  | .                  | . | .         |
| .                  | .                  | .                  | .                  | .                  | . | .         |
| .                  | .                  | .                  | .                  | .                  | . | .         |
| Vv13g0419          | .                  | .                  | .                  | .                  | . | .         |
| Vv08g0997          | Tc05_g004240       | .                  | .                  | .                  | . | Gorai.    |
| 012G105400.1       | .                  | .                  | .                  | .                  | . | .         |
| .                  | .                  | .                  | .                  | .                  | . | .         |
| Vv13g0420          | .                  | .                  | .                  | .                  | . | .         |
| .                  | .                  | .                  | .                  | .                  | . | .         |
| .                  | .                  | .                  | .                  | .                  | . | .         |
| Vv13g0421          | .                  | .                  | .                  | .                  | . | .         |
| .                  | .                  | .                  | .                  | .                  | . | .         |
| .                  | .                  | .                  | .                  | .                  | . | .         |
| Vv13g0422          | Tc10_g000980       | .                  | .                  | .                  | . | .         |
| .                  | .                  | .                  | .                  | .                  | . | .         |
| .                  | .                  | .                  | .                  | .                  | . | .         |
| Vv13g0423          | .                  | .                  | Gorai.011G267600.1 | .                  | . | .         |
| Gorai.010G200600.1 | .                  | .                  | Vv08g1004          | Tc05_g004060       | . | .         |
| .                  | .                  | Gorai.012G106000.1 | .                  | Vv06g0603          | . | .         |
| .                  | .                  | .                  | .                  | .                  | . | .         |
| Vv13g0424          | Tc10_g001160       | .                  | Gorai.011G267700.1 | .                  | . | .         |
| .                  | .                  | .                  | .                  | .                  | . | .         |
| .                  | .                  | .                  | .                  | .                  | . | .         |
| Vv13g0425          | .                  | .                  | .                  | .                  | . | .         |
| .                  | .                  | .                  | .                  | .                  | . | .         |
| .                  | .                  | .                  | .                  | .                  | . | .         |
| Vv13g0426          | .                  | .                  | .                  | .                  | . | .         |
| .                  | .                  | .                  | .                  | .                  | . | .         |
| .                  | .                  | .                  | .                  | .                  | . | .         |
| Vv13g0427          | .                  | .                  | .                  | .                  | . | .         |
| .                  | .                  | .                  | .                  | .                  | . | .         |
| .                  | .                  | .                  | .                  | .                  | . | .         |
| Vv13g0428          | .                  | .                  | .                  | .                  | . | .         |
| .                  | .                  | .                  | .                  | .                  | . | .         |
| .                  | .                  | .                  | .                  | .                  | . | .         |
| Vv13g0429          | .                  | .                  | Gorai.011G267800.1 | .                  | . | .         |
| .                  | .                  | .                  | .                  | .                  | . | .         |
| .                  | .                  | .                  | .                  | .                  | . | .         |

|              |                    |                    |                    |   |           |
|--------------|--------------------|--------------------|--------------------|---|-----------|
| Vv13g0430    | .                  | .                  | Gorai.011G267900.1 | . | .         |
| .            | .                  | .                  | .                  | . | .         |
| Vv13g0431    | .                  | .                  | Gorai.011G268000.1 | . | .         |
| .            | Vv08g1008          | .                  | Tc05_g004020       | . | .         |
| .            | .                  | Vv06g0610          | .                  | . | .         |
| Vv13g0432    | .                  | .                  | .                  | . | .         |
| .            | .                  | .                  | .                  | . | .         |
| Vv13g0433    | .                  | .                  | .                  | . | .         |
| .            | .                  | .                  | .                  | . | .         |
| Vv13g0434    | .                  | .                  | .                  | . | .         |
| .            | .                  | .                  | .                  | . | .         |
| Vv13g0435    | .                  | .                  | .                  | . | .         |
| .            | .                  | .                  | .                  | . | .         |
| Vv13g0436    | .                  | .                  | .                  | . | .         |
| .            | .                  | .                  | .                  | . | .         |
| Vv13g0437    | .                  | .                  | .                  | . | .         |
| .            | .                  | .                  | .                  | . | .         |
| Vv13g0438    | .                  | .                  | .                  | . | .         |
| .            | .                  | .                  | .                  | . | .         |
| Vv13g0439    | .                  | .                  | .                  | . | Gorai.    |
| 012G072100.1 | .                  | .                  | .                  | . | .         |
| .            | .                  | .                  | .                  | . | .         |
| Vv13g0440    | Tc10_g001270       | .                  | .                  | . | .         |
| .            | .                  | .                  | .                  | . | .         |
| Vv06g0638    | Tc09_g031060       | .                  | .                  | . | Gorai.    |
| 009G096200.1 | Gorai.003G128900.1 | .                  | .                  | . | .         |
| Vv13g0441    | .                  | .                  | .                  | . | .         |
| .            | .                  | .                  | .                  | . | Vv06g0639 |
| .            | Tc09_g031050       | Gorai.013G261900.1 | .                  | . | .         |
| .            | Gorai.003G128800.1 | .                  | .                  | . | .         |
| Vv13g0442    | .                  | .                  | Gorai.011G268300.1 | . | .         |
| .            | .                  | .                  | .                  | . | .         |
| Vv13g0443    | .                  | .                  | .                  | . | .         |
| .            | .                  | .                  | .                  | . | .         |
| Vv13g0444    | .                  | .                  | .                  | . | .         |
| .            | .                  | .                  | .                  | . | .         |
| Vv13g0445    | .                  | .                  | Gorai.011G268400.1 | . | .         |
| .            | Gorai.012G072300.1 | .                  | .                  | . | .         |

|                    |                    |                    |                    |        |   |   |   |
|--------------------|--------------------|--------------------|--------------------|--------|---|---|---|
| .                  | .                  | .                  | .                  | .      | . | . | . |
| .                  | .                  | .                  | .                  | .      | . | . | . |
| Vv13g0446          | .                  | .                  | Gorai.011G268500.1 | .      | . | . | . |
| Gorai.010G200500.1 | .                  | .                  | .                  | .      | . | . | . |
| .                  | .                  | .                  | .                  | .      | . | . | . |
| .                  | .                  | .                  | .                  | .      | . | . | . |
| Vv13g0447          | .                  | .                  | .                  | .      | . | . | . |
| .                  | .                  | .                  | .                  | .      | . | . | . |
| .                  | .                  | .                  | .                  | .      | . | . | . |
| Vv13g0448          | .                  | .                  | Gorai.011G268700.1 | .      | . | . | . |
| Gorai.012G072600.1 | .                  | .                  | .                  | .      | . | . | . |
| .                  | .                  | .                  | .                  | .      | . | . | . |
| .                  | .                  | .                  | .                  | .      | . | . | . |
| Vv13g0449          | .                  | .                  | .                  | .      | . | . | . |
| .                  | .                  | .                  | .                  | .      | . | . | . |
| .                  | .                  | .                  | .                  | .      | . | . | . |
| Vv13g0450          | .                  | .                  | .                  | .      | . | . | . |
| .                  | .                  | .                  | .                  | .      | . | . | . |
| .                  | .                  | .                  | .                  | .      | . | . | . |
| Vv13g0451          | .                  | .                  | .                  | .      | . | . | . |
| .                  | .                  | .                  | .                  | .      | . | . | . |
| .                  | .                  | .                  | .                  | .      | . | . | . |
| Vv13g0452          | .                  | .                  | Gorai.011G268900.1 | .      | . | . | . |
| Gorai.010G200400.1 | .                  | .                  | .                  | .      | . | . | . |
| .                  | .                  | .                  | .                  | .      | . | . | . |
| .                  | .                  | .                  | .                  | .      | . | . | . |
| Vv13g0453          | Tc10_g002650       | .                  | Gorai.011G269100.1 | .      | . | . | . |
| .                  | Gorai.012G072800.1 | .                  | .                  | .      | . | . | . |
| .                  | .                  | .                  | .                  | .      | . | . | . |
| .                  | .                  | .                  | .                  | .      | . | . | . |
| Vv13g0454          | Tc10_g002620       | .                  | Gorai.011G269200.1 | .      | . | . | . |
| .                  | Vv08g1021          | .                  | Tc05_g003910       | Gorai. | . | . | . |
| 006G170500.1       | .                  | Gorai.012G107000.1 | .                  | .      | . | . | . |
| .                  | .                  | .                  | .                  | .      | . | . | . |
| Vv13g0455          | Tc10_g002600       | .                  | Gorai.011G269600.1 | .      | . | . | . |
| .                  | Gorai.012G073000.1 | .                  | .                  | .      | . | . | . |
| .                  | .                  | .                  | .                  | .      | . | . | . |
| .                  | .                  | .                  | .                  | .      | . | . | . |
| Vv13g0456          | Tc10_g002590       | .                  | Gorai.011G269700.1 | .      | . | . | . |
| .                  | Vv08g1028          | .                  | Tc05_g003840       | .      | . | . | . |
| .                  | Gorai.012G107700.1 | .                  | .                  | .      | . | . | . |
| .                  | .                  | .                  | .                  | .      | . | . | . |
| Vv13g0457          | .                  | .                  | .                  | .      | . | . | . |
| .                  | .                  | .                  | .                  | .      | . | . | . |
| .                  | .                  | .                  | .                  | .      | . | . | . |
| Vv13g0458          | Tc10_g002580       | .                  | Gorai.011G269800.1 | .      | . | . | . |
| .                  | Gorai.012G073100.1 | .                  | .                  | .      | . | . | . |
| .                  | .                  | .                  | .                  | .      | . | . | . |
| .                  | .                  | .                  | .                  | .      | . | . | . |
| Vv13g0459          | Tc10_g002530       | .                  | Gorai.011G269900.1 | .      | . | . | . |

|                    |                    |                    |   |                    |   |   |   |
|--------------------|--------------------|--------------------|---|--------------------|---|---|---|
| .                  | .                  | .                  | . | .                  | . | . | . |
| .                  | .                  | .                  | . | .                  | . | . | . |
| Vv13g0460          | Tc10_g002450       | .                  | . | Gorai.011G270500.1 | . | . | . |
| .                  | .                  | .                  | . | .                  | . | . | . |
| .                  | .                  | .                  | . | .                  | . | . | . |
| Vv13g0461          | .                  | .                  | . | .                  | . | . | . |
| .                  | .                  | .                  | . | .                  | . | . | . |
| .                  | .                  | .                  | . | .                  | . | . | . |
| Vv13g0462          | Tc10_g002430       | .                  | . | .                  | . | . | . |
| .                  | .                  | .                  | . | .                  | . | . | . |
| .                  | .                  | .                  | . | .                  | . | . | . |
| Vv13g0463          | Tc10_g002410       | .                  | . | Gorai.011G270900.1 | . | . | . |
| .                  | .                  | .                  | . | .                  | . | . | . |
| .                  | .                  | .                  | . | .                  | . | . | . |
| Vv13g0464          | Tc10_g002400       | .                  | . | Gorai.011G271000.1 | . | . | . |
| .                  | .                  | .                  | . | .                  | . | . | . |
| .                  | .                  | .                  | . | .                  | . | . | . |
| Vv13g0465          | Tc10_g002390       | .                  | . | Gorai.011G271200.1 | . | . | . |
| .                  | Vv08g1047          | .                  | . | Tc05_g003660       | . | . | . |
| Gorai.002G255800.1 | .                  | Gorai.012G108300.1 | . | .                  | . | . | . |
| .                  | .                  | .                  | . | .                  | . | . | . |
| Vv13g0466          | Tc10_g002380       | .                  | . | .                  | . | . | . |
| Vv08g1049          | Tc05_g003640       | .                  | . | Gorai.006G169400.1 | . | . | . |
| .                  | .                  | .                  | . | .                  | . | . | . |
| .                  | .                  | .                  | . | .                  | . | . | . |
| Vv13g0467          | Tc10_g002370       | .                  | . | Gorai.011G271400.1 | . | . | . |
| .                  | Gorai.012G073300.1 | .                  | . | .                  | . | . | . |
| .                  | .                  | .                  | . | .                  | . | . | . |
| .                  | .                  | .                  | . | .                  | . | . | . |
| Vv13g0468          | Tc10_g002350       | .                  | . | Gorai.011G272000.1 | . | . | . |
| Gorai.010G200300.1 | .                  | .                  | . | .                  | . | . | . |
| .                  | .                  | .                  | . | .                  | . | . | . |
| .                  | .                  | .                  | . | .                  | . | . | . |
| Vv13g0469          | Tc10_g002340       | .                  | . | Gorai.011G272100.1 | . | . | . |
| Gorai.010G200200.1 | .                  | .                  | . | .                  | . | . | . |
| .                  | .                  | .                  | . | .                  | . | . | . |
| .                  | .                  | .                  | . | .                  | . | . | . |
| Vv13g0470          | .                  | .                  | . | .                  | . | . | . |
| .                  | .                  | .                  | . | .                  | . | . | . |
| .                  | .                  | .                  | . | .                  | . | . | . |
| Vv13g0471          | Tc10_g002320       | .                  | . | Gorai.011G272200.1 | . | . | . |
| Gorai.010G200000.1 | .                  | .                  | . | .                  | . | . | . |
| .                  | .                  | .                  | . | .                  | . | . | . |
| .                  | .                  | .                  | . | .                  | . | . | . |
| Vv13g0472          | .                  | .                  | . | .                  | . | . | . |
| .                  | .                  | .                  | . | .                  | . | . | . |
| .                  | .                  | .                  | . | .                  | . | . | . |
| Vv13g0473          | Tc10_g002310       | .                  | . | Gorai.011G272300.1 | . | . | . |
| .                  | .                  | .                  | . | .                  | . | . | . |
| .                  | .                  | .                  | . | .                  | . | . | . |

|           |   |   |   |   |   |   |   |
|-----------|---|---|---|---|---|---|---|
| Vv13g0474 | . | . | . | . | . | . | . |
| .         | . | . | . | . | . | . | . |
| Vv13g0475 | . | . | . | . | . | . | . |
| .         | . | . | . | . | . | . | . |
| Vv13g0476 | . | . | . | . | . | . | . |
| .         | . | . | . | . | . | . | . |
| Vv13g0477 | . | . | . | . | . | . | . |
| .         | . | . | . | . | . | . | . |
| Vv13g0478 | . | . | . | . | . | . | . |
| .         | . | . | . | . | . | . | . |
| Vv13g0479 | . | . | . | . | . | . | . |
| .         | . | . | . | . | . | . | . |
| Vv13g0480 | . | . | . | . | . | . | . |
| .         | . | . | . | . | . | . | . |
| Vv13g0481 | . | . | . | . | . | . | . |
| .         | . | . | . | . | . | . | . |
| Vv13g0482 | . | . | . | . | . | . | . |
| .         | . | . | . | . | . | . | . |
| Vv13g0483 | . | . | . | . | . | . | . |
| .         | . | . | . | . | . | . | . |
| Vv13g0484 | . | . | . | . | . | . | . |
| .         | . | . | . | . | . | . | . |
| Vv13g0485 | . | . | . | . | . | . | . |
| .         | . | . | . | . | . | . | . |
| Vv13g0486 | . | . | . | . | . | . | . |
| .         | . | . | . | . | . | . | . |
| Vv13g0487 | . | . | . | . | . | . | . |
| .         | . | . | . | . | . | . | . |
| Vv13g0488 | . | . | . | . | . | . | . |
| .         | . | . | . | . | . | . | . |
| Vv13g0489 | . | . | . | . | . | . | . |
| .         | . | . | . | . | . | . | . |
| Vv13g0490 | . | . | . | . | . | . | . |
| .         | . | . | . | . | . | . | . |

|                    |                    |                    |                    |   |        |   |
|--------------------|--------------------|--------------------|--------------------|---|--------|---|
| Vv13g0491          | .                  | .                  | .                  | . | .      | . |
| Vv08g1053          | Tc05_g003600       | .                  | .                  | . | Gorai. | . |
| 012G108500.1       | .                  | .                  | .                  | . | .      | . |
| Vv13g0492          | .                  | .                  | .                  | . | Gorai. | . |
| 012G073500.1       | Vv08g1054          | Tc05_g003590       | Gorai.006G178100.1 | . | .      | . |
| .                  | Gorai.012G108600.1 | .                  | Gorai.007G377300.1 | . | .      | . |
| Vv13g0493          | .                  | .                  | Gorai.011G274100.1 | . | .      | . |
| Gorai.012G073600.1 | .                  | Vv08g1055          | Tc05_g003580       | . | .      | . |
| Gorai.006G178200.1 | .                  | .                  | Gorai.007G377400.1 | . | .      | . |
| Vv13g0494          | .                  | .                  | Gorai.011G274200.1 | . | .      | . |
| .                  | .                  | .                  | .                  | . | .      | . |
| Vv13g0495          | .                  | .                  | Gorai.011G274300.1 | . | .      | . |
| Gorai.010G199600.1 | .                  | Vv08g1057          | Gorai.             | . | .      | . |
| 006G178300.1       | Gorai.002G258900.1 | .                  | .                  | . | .      | . |
| Vv13g0496          | .                  | .                  | Gorai.011G274500.1 | . | .      | . |
| .                  | .                  | .                  | .                  | . | .      | . |
| Vv13g0497          | .                  | .                  | Gorai.011G274600.1 | . | .      | . |
| Gorai.012G073700.1 | .                  | Vv08g1064          | Tc05_g003490       | . | .      | . |
| Gorai.006G178800.1 | .                  | Gorai.012G109000.1 | .                  | . | .      | . |
| Gorai.007G377500.1 | .                  | .                  | .                  | . | .      | . |
| Vv13g0498          | .                  | .                  | .                  | . | .      | . |
| Vv04g0160          | .                  | .                  | .                  | . | .      | . |
| Vv13g0499          | .                  | .                  | .                  | . | .      | . |
| Vv04g0159          | .                  | .                  | .                  | . | .      | . |
| Vv13g0500          | .                  | .                  | .                  | . | .      | . |
| Vv04g0158          | .                  | .                  | .                  | . | .      | . |
| Vv13g0501          | .                  | .                  | .                  | . | .      | . |
| Vv04g0157          | .                  | .                  | .                  | . | .      | . |
| Vv13g0502          | .                  | .                  | .                  | . | .      | . |
| Vv13g0503          | .                  | .                  | .                  | . | .      | . |
| Vv13g0504          | .                  | .                  | .                  | . | .      | . |
| Vv13g0505          | .                  | .                  | .                  | . | .      | . |

|           |   |   |                    |   |   |   |   |
|-----------|---|---|--------------------|---|---|---|---|
| .         | . | . | .                  | . | . | . | . |
| .         | . | . | .                  | . | . | . | . |
| Vv13g0506 | . | . | .                  | . | . | . | . |
| Vv04g0156 | . | . | .                  | . | . | . | . |
| .         | . | . | .                  | . | . | . | . |
| Vv13g0507 | . | . | .                  | . | . | . | . |
| .         | . | . | .                  | . | . | . | . |
| .         | . | . | .                  | . | . | . | . |
| Vv13g0508 | . | . | .                  | . | . | . | . |
| Vv04g0155 | . | . | .                  | . | . | . | . |
| .         | . | . | .                  | . | . | . | . |
| Vv13g0509 | . | . | .                  | . | . | . | . |
| .         | . | . | .                  | . | . | . | . |
| .         | . | . | .                  | . | . | . | . |
| Vv13g0510 | . | . | .                  | . | . | . | . |
| .         | . | . | .                  | . | . | . | . |
| .         | . | . | .                  | . | . | . | . |
| Vv13g0511 | . | . | .                  | . | . | . | . |
| .         | . | . | .                  | . | . | . | . |
| .         | . | . | .                  | . | . | . | . |
| Vv13g0512 | . | . | .                  | . | . | . | . |
| .         | . | . | .                  | . | . | . | . |
| .         | . | . | .                  | . | . | . | . |
| Vv13g0513 | . | . | Gorai.011G275500.1 | . | . | . | . |
| .         | . | . | .                  | . | . | . | . |
| .         | . | . | .                  | . | . | . | . |
| Vv13g0514 | . | . | .                  | . | . | . | . |
| Vv04g0151 | . | . | .                  | . | . | . | . |
| .         | . | . | .                  | . | . | . | . |
| Vv13g0515 | . | . | .                  | . | . | . | . |
| .         | . | . | .                  | . | . | . | . |
| .         | . | . | .                  | . | . | . | . |
| Vv13g0516 | . | . | .                  | . | . | . | . |
| .         | . | . | .                  | . | . | . | . |
| .         | . | . | .                  | . | . | . | . |
| Vv13g0517 | . | . | .                  | . | . | . | . |
| .         | . | . | .                  | . | . | . | . |
| .         | . | . | .                  | . | . | . | . |
| Vv13g0518 | . | . | .                  | . | . | . | . |
| .         | . | . | .                  | . | . | . | . |
| .         | . | . | .                  | . | . | . | . |
| Vv13g0519 | . | . | .                  | . | . | . | . |
| .         | . | . | .                  | . | . | . | . |
| .         | . | . | .                  | . | . | . | . |
| Vv13g0520 | . | . | .                  | . | . | . | . |
| .         | . | . | .                  | . | . | . | . |
| .         | . | . | .                  | . | . | . | . |
| Vv13g0521 | . | . | .                  | . | . | . | . |
| .         | . | . | .                  | . | . | . | . |
| .         | . | . | .                  | . | . | . | . |



|           |           |   |   |                    |                    |   |   |
|-----------|-----------|---|---|--------------------|--------------------|---|---|
| Vv13g0522 | .         | . | . | .                  | .                  | . | . |
| .         | .         | . | . | .                  | .                  | . | . |
| Vv13g0523 | .         | . | . | .                  | .                  | . | . |
| .         | .         | . | . | .                  | .                  | . | . |
| Vv13g0524 | .         | . | . | .                  | .                  | . | . |
| .         | .         | . | . | .                  | .                  | . | . |
| Vv13g0525 | .         | . | . | .                  | .                  | . | . |
| .         | .         | . | . | .                  | .                  | . | . |
| Vv13g0526 | .         | . | . | .                  | .                  | . | . |
| .         | .         | . | . | .                  | .                  | . | . |
| Vv13g0527 | .         | . | . | .                  | .                  | . | . |
| .         | .         | . | . | .                  | .                  | . | . |
| Vv13g0528 | .         | . | . | .                  | .                  | . | . |
| .         | .         | . | . | .                  | .                  | . | . |
| Vv13g0529 | .         | . | . | .                  | .                  | . | . |
| .         | .         | . | . | .                  | .                  | . | . |
| Vv13g0530 | .         | . | . | .                  | .                  | . | . |
| .         | .         | . | . | .                  | .                  | . | . |
| Vv13g0531 | .         | . | . | .                  | .                  | . | . |
| .         | .         | . | . | .                  | .                  | . | . |
| Vv13g0532 | .         | . | . | .                  | .                  | . | . |
| Vv04g0150 | .         | . | . | .                  | .                  | . | . |
| .         | .         | . | . | .                  | .                  | . | . |
| Vv13g0533 | .         | . | . | .                  | .                  | . | . |
| .         | .         | . | . | .                  | .                  | . | . |
| Vv13g0534 | .         | . | . | .                  | .                  | . | . |
| .         | .         | . | . | .                  | .                  | . | . |
| Vv13g0535 | .         | . | . | Gorai.011G275900.1 | .                  | . | . |
| .         | Vv04g0149 | . | . | .                  | Gorai.001G021400.1 | . | . |
| .         | .         | . | . | .                  | .                  | . | . |
| Vv13g0536 | .         | . | . | .                  | .                  | . | . |
| .         | .         | . | . | .                  | .                  | . | . |
| Vv13g0537 | .         | . | . | .                  | .                  | . | . |
| .         | .         | . | . | .                  | .                  | . | . |
| Vv13g0538 | .         | . | . | .                  | .                  | . | . |

|           |   |   |   |   |   |   |   |
|-----------|---|---|---|---|---|---|---|
| .         | . | . | . | . | . | . | . |
| Vv13g0539 | . | . | . | . | . | . | . |
| .         | . | . | . | . | . | . | . |
| Vv13g0540 | . | . | . | . | . | . | . |
| .         | . | . | . | . | . | . | . |
| Vv13g0541 | . | . | . | . | . | . | . |
| .         | . | . | . | . | . | . | . |
| Vv13g0542 | . | . | . | . | . | . | . |
| .         | . | . | . | . | . | . | . |
| Vv13g0543 | . | . | . | . | . | . | . |
| .         | . | . | . | . | . | . | . |
| Vv13g0544 | . | . | . | . | . | . | . |
| .         | . | . | . | . | . | . | . |
| Vv13g0545 | . | . | . | . | . | . | . |
| .         | . | . | . | . | . | . | . |
| Vv13g0546 | . | . | . | . | . | . | . |
| .         | . | . | . | . | . | . | . |
| Vv13g0547 | . | . | . | . | . | . | . |
| .         | . | . | . | . | . | . | . |
| Vv13g0548 | . | . | . | . | . | . | . |
| .         | . | . | . | . | . | . | . |
| Vv13g0549 | . | . | . | . | . | . | . |
| .         | . | . | . | . | . | . | . |
| Vv13g0550 | . | . | . | . | . | . | . |
| .         | . | . | . | . | . | . | . |
| Vv13g0551 | . | . | . | . | . | . | . |
| .         | . | . | . | . | . | . | . |
| Vv13g0552 | . | . | . | . | . | . | . |
| .         | . | . | . | . | . | . | . |
| Vv13g0553 | . | . | . | . | . | . | . |
| .         | . | . | . | . | . | . | . |
| Vv13g0554 | . | . | . | . | . | . | . |
| .         | . | . | . | . | . | . | . |
| .         | . | . | . | . | . | . | . |

|              |              |                    |                    |                    |        |   |
|--------------|--------------|--------------------|--------------------|--------------------|--------|---|
| Vv13g0555    | .            | .                  | .                  | .                  | .      | . |
| Vv04g0148    | .            | .                  | .                  | .                  | .      | . |
| .            | .            | .                  | .                  | .                  | .      | . |
| Vv13g0556    | .            | .                  | Gorai.011G278300.1 | .                  | .      | . |
| .            | .            | .                  | .                  | .                  | .      | . |
| .            | .            | .                  | .                  | .                  | .      | . |
| Vv13g0557    | .            | Gorai.013G020500.1 | .                  | Gorai.011G278400.1 | .      | . |
| .            | .            | .                  | .                  | .                  | .      | . |
| .            | .            | .                  | .                  | .                  | .      | . |
| Vv13g0558    | .            | .                  | .                  | .                  | .      | . |
| .            | .            | .                  | .                  | .                  | .      | . |
| .            | .            | .                  | .                  | .                  | .      | . |
| Vv13g0559    | Tc10_g002290 | .                  | Gorai.013G020300.1 | .                  | Gorai. | . |
| 011G278600.1 | .            | .                  | .                  | .                  | .      | . |
| .            | .            | .                  | .                  | .                  | .      | . |
| .            | .            | .                  | .                  | .                  | .      | . |
| Vv13g0560    | Tc10_g002270 | .                  | Gorai.011G278700.1 | .                  | .      | . |
| .            | .            | .                  | .                  | .                  | .      | . |
| .            | .            | .                  | .                  | .                  | .      | . |
| Vv13g0561    | .            | .                  | .                  | .                  | .      | . |
| .            | .            | .                  | .                  | .                  | .      | . |
| .            | .            | .                  | .                  | .                  | .      | . |
| Vv13g0562    | Tc10_g013130 | .                  | Gorai.011G278800.1 | .                  | .      | . |
| .            | .            | .                  | .                  | .                  | .      | . |
| .            | .            | .                  | .                  | .                  | .      | . |
| Vv13g0563    | Tc10_g002260 | .                  | Gorai.013G020100.1 | .                  | .      | . |
| .            | .            | .                  | .                  | .                  | .      | . |
| .            | .            | .                  | .                  | .                  | .      | . |
| Vv13g0564    | .            | .                  | .                  | .                  | .      | . |
| .            | .            | .                  | .                  | .                  | .      | . |
| .            | .            | .                  | .                  | .                  | .      | . |
| Vv13g0565    | Tc10_g002220 | .                  | Gorai.013G019900.1 | .                  | Gorai. | . |
| 011G279000.1 | .            | .                  | .                  | .                  | .      | . |
| .            | .            | .                  | .                  | .                  | .      | . |
| .            | .            | .                  | .                  | .                  | .      | . |
| Vv13g0566    | Tc10_g002200 | .                  | Gorai.013G019800.1 | .                  | Gorai. | . |
| 011G279100.1 | .            | .                  | .                  | .                  | .      | . |
| .            | .            | .                  | .                  | .                  | .      | . |
| .            | .            | .                  | .                  | .                  | .      | . |
| Vv13g0567    | .            | .                  | .                  | .                  | .      | . |
| .            | .            | .                  | .                  | .                  | .      | . |
| .            | .            | .                  | .                  | .                  | .      | . |
| Vv13g0568    | Tc10_g002190 | .                  | Gorai.013G019700.1 | .                  | .      | . |
| .            | .            | .                  | .                  | .                  | .      | . |
| .            | .            | .                  | .                  | .                  | .      | . |
| Vv13g0569    | Tc10_g013030 | .                  | .                  | .                  | .      | . |
| .            | .            | .                  | .                  | .                  | .      | . |
| .            | .            | .                  | .                  | .                  | .      | . |
| Vv13g0570    | Tc10_g002180 | .                  | Gorai.011G279300.1 | .                  | .      | . |

|                           |                    |                    |                    |                    |  |
|---------------------------|--------------------|--------------------|--------------------|--------------------|--|
| Vv13g0571                 | Tc10_g002170       |                    |                    |                    |  |
| Vv13g0572                 | Tc10_g002120       |                    | Gorai.011G279900.1 |                    |  |
| Vv13g0573                 | Tc10_g002100       |                    | Gorai.011G280200.1 |                    |  |
| Vv13g0574                 |                    |                    |                    |                    |  |
| Vv13g0575<br>011G280300.1 | Tc10_g002090       | Gorai.013G019600.1 |                    | Gorai.             |  |
| Vv13g0576                 | Tc10_g002080       |                    | Gorai.011G280400.1 |                    |  |
| Vv13g0577                 |                    |                    |                    |                    |  |
| Vv13g0578<br>011G280500.1 | Tc10_g002060       | Gorai.013G019500.1 |                    | Gorai.             |  |
| Vv13g0579                 | Tc10_g002040       |                    | Gorai.011G282700.1 |                    |  |
| Vv13g0580                 |                    |                    |                    |                    |  |
| Vv13g0581                 | Tc10_g002020       |                    | Gorai.011G283000.1 |                    |  |
|                           | Vv06g0441          |                    | Tc09_g032770       |                    |  |
|                           | Gorai.009G103500.1 |                    | Gorai.003G138900.1 |                    |  |
| Vv13g0582                 |                    | Gorai.013G019400.1 |                    | Gorai.011G283100.1 |  |
| Vv13g0583                 |                    |                    | Gorai.009G315700.1 |                    |  |
| Gorai.004G002200.1        | Vv06g0427          |                    | Tc09_g032950       |                    |  |
| Vv13g0584                 | Tc10_g004710       |                    |                    |                    |  |
| Vv13g0585                 | Tc10_g004730       |                    |                    | Gorai.             |  |

|                    |              |                    |                    |   |   |   |
|--------------------|--------------|--------------------|--------------------|---|---|---|
| 010G203700.1       | .            | .                  | .                  | . | . | . |
| Vv13g0586          | Tc10_g004740 | .                  | Gorai.011G241700.1 | . | . | . |
| Vv13g0587          | Tc10_g004750 | Gorai.013G024700.1 | .                  | . | . | . |
| Vv13g0588          | Tc10_g004760 | Gorai.013G024800.1 | .                  | . | . | . |
| Vv13g0589          | Tc10_g004860 | .                  | .                  | . | . | . |
| Vv13g0590          | Tc10_g004870 | .                  | Gorai.011G241600.1 | . | . | . |
| Gorai.009G315600.1 | .            | .                  | Vv06g0410          | . | . | . |
| Gorai.001G126500.1 | .            | Gorai.004G011500.1 | .                  | . | . | . |
| Gorai.006G116300.1 | .            | .                  | .                  | . | . | . |
| Vv13g0591          | Tc10_g004890 | .                  | Gorai.011G241500.1 | . | . | . |
| Gorai.009G315100.1 | .            | .                  | .                  | . | . | . |
| Vv13g0592          | Tc10_g004900 | .                  | .                  | . | . | . |
| Vv13g0593          | .            | .                  | .                  | . | . | . |
| Vv13g0594          | .            | .                  | .                  | . | . | . |
| Vv13g0595          | .            | .                  | .                  | . | . | . |
| Vv08g0857          | .            | .                  | .                  | . | . | . |
| Vv13g0596          | Tc10_g004940 | .                  | .                  | . | . | . |
| Vv13g0597          | .            | Gorai.013G025000.1 | .                  | . | . | . |
| Vv13g0598          | Tc10_g004980 | .                  | .                  | . | . | . |
| Vv13g0599          | Tc10_g004990 | .                  | .                  | . | . | . |
| Vv13g0600          | .            | .                  | .                  | . | . | . |
| .                  | .            | .                  | .                  | . | . | . |
| .                  | .            | .                  | .                  | . | . | . |

|                    |              |                    |   |                    |           |   |   |
|--------------------|--------------|--------------------|---|--------------------|-----------|---|---|
| Vv13g0601          | .            | .                  | . | .                  | .         | . | . |
| .                  | .            | .                  | . | .                  | .         | . | . |
| Vv13g0602          | .            | .                  | . | .                  | .         | . | . |
| .                  | .            | .                  | . | .                  | .         | . | . |
| Vv13g0603          | Tc10_g005000 | .                  | . | .                  | .         | . | . |
| .                  | .            | .                  | . | .                  | .         | . | . |
| Vv13g0604          | .            | .                  | . | .                  | .         | . | . |
| .                  | .            | .                  | . | .                  | .         | . | . |
| Vv13g0605          | .            | Gorai.013G016900.1 | . | .                  | .         | . | . |
| Gorai.010G203800.1 | .            | .                  | . | .                  | .         | . | . |
| .                  | .            | .                  | . | .                  | .         | . | . |
| Vv13g0606          | .            | Gorai.013G014500.1 | . | .                  | .         | . | . |
| .                  | .            | .                  | . | .                  | .         | . | . |
| Vv13g0607          | .            | .                  | . | .                  | .         | . | . |
| .                  | .            | .                  | . | .                  | .         | . | . |
| Vv13g0608          | .            | .                  | . | .                  | .         | . | . |
| .                  | .            | .                  | . | .                  | .         | . | . |
| Vv13g0609          | .            | .                  | . | .                  | .         | . | . |
| .                  | .            | .                  | . | .                  | .         | . | . |
| Vv13g0610          | .            | .                  | . | .                  | .         | . | . |
| .                  | .            | .                  | . | .                  | .         | . | . |
| Vv13g0611          | .            | .                  | . | .                  | .         | . | . |
| .                  | .            | .                  | . | .                  | .         | . | . |
| Vv13g0612          | .            | .                  | . | .                  | .         | . | . |
| .                  | .            | .                  | . | .                  | .         | . | . |
| Vv13g0613          | .            | .                  | . | .                  | .         | . | . |
| .                  | .            | .                  | . | .                  | .         | . | . |
| Vv13g0614          | .            | .                  | . | .                  | .         | . | . |
| .                  | .            | .                  | . | .                  | .         | . | . |
| Vv13g0615          | .            | .                  | . | .                  | .         | . | . |
| .                  | .            | .                  | . | .                  | .         | . | . |
| Vv13g0616          | .            | .                  | . | .                  | .         | . | . |
| .                  | .            | .                  | . | .                  | .         | . | . |
| .                  | .            | Gorai.001G129700.1 | . | .                  | Vv06g0395 | . | . |
| .                  | .            | Gorai.006G120900.1 | . | Gorai.004G012800.1 | .         | . | . |
| .                  | .            | .                  | . | .                  | .         | . | . |

|                    |                    |   |   |                    |                    |           |   |
|--------------------|--------------------|---|---|--------------------|--------------------|-----------|---|
| Vv13g0617          | .                  | . | . | .                  | .                  | .         | . |
| .                  | .                  | . | . | .                  | .                  | .         | . |
| Vv13g0618          | .                  | . | . | .                  | .                  | .         | . |
| .                  | .                  | . | . | .                  | .                  | Vv06g0393 | . |
| Vv13g0619          | .                  | . | . | .                  | .                  | .         | . |
| .                  | .                  | . | . | .                  | .                  | .         | . |
| Vv13g0620          | .                  | . | . | .                  | .                  | .         | . |
| .                  | .                  | . | . | .                  | .                  | .         | . |
| Vv13g0621          | .                  | . | . | .                  | .                  | .         | . |
| .                  | .                  | . | . | .                  | .                  | .         | . |
| Vv13g0622          | .                  | . | . | .                  | .                  | .         | . |
| .                  | .                  | . | . | .                  | .                  | .         | . |
| Vv13g0623          | Tc10_g005010       | . | . | .                  | .                  | .         | . |
| .                  | .                  | . | . | .                  | .                  | .         | . |
| Vv13g0624          | Tc10_g005020       | . | . | .                  | .                  | Gorai.    | . |
| 010G204000.1       | .                  | . | . | .                  | .                  | .         | . |
| Vv13g0625          | .                  | . | . | .                  | .                  | .         | . |
| .                  | .                  | . | . | .                  | .                  | .         | . |
| Vv13g0626          | .                  | . | . | .                  | .                  | .         | . |
| .                  | .                  | . | . | .                  | .                  | .         | . |
| Vv13g0627          | Tc10_g005040       | . | . | .                  | Gorai.009G314900.1 | .         | . |
| Gorai.010G204200.1 | .                  | . | . | Vv08g0828          | .                  | .         | . |
| Tc05_g005990       | Gorai.006G168400.1 | . | . | Gorai.002G249700.1 | .                  | .         | . |
| .                  | .                  | . | . | .                  | .                  | .         | . |
| Vv13g0628          | Tc10_g005070       | . | . | .                  | .                  | .         | . |
| .                  | .                  | . | . | .                  | .                  | .         | . |
| Vv13g0629          | .                  | . | . | .                  | .                  | .         | . |
| .                  | .                  | . | . | .                  | .                  | .         | . |
| Vv13g0630          | Tc10_g005090       | . | . | Gorai.011G241200.1 | .                  | .         | . |
| Gorai.010G204400.1 | .                  | . | . | Vv08g0824          | .                  | .         | . |
| Tc05_g006010       | Gorai.002G249600.1 | . | . | .                  | .                  | .         | . |
| Vv06g0382          | .                  | . | . | .                  | .                  | .         | . |
| Vv13g0631          | Tc10_g005100       | . | . | .                  | Gorai.             | .         | . |
| 010G204700.1       | .                  | . | . | .                  | .                  | .         | . |
| .                  | .                  | . | . | .                  | .                  | .         | . |
| Vv13g0632          | Tc10_g005120       | . | . | Gorai.011G241100.1 | .                  | .         | . |
| .                  | .                  | . | . | .                  | .                  | .         | . |

|              |                    |                    |   |                    |                    |   |   |
|--------------|--------------------|--------------------|---|--------------------|--------------------|---|---|
| Vv13g0633    | .                  | .                  | . | .                  | .                  | . | . |
| .            | .                  | .                  | . | .                  | .                  | . | . |
| Vv13g0634    | Tc10_g005150       | .                  | . | .                  | Gorai.009G314800.1 | . | . |
| .            | .                  | .                  | . | .                  | .                  | . | . |
| Vv13g0635    | .                  | .                  | . | .                  | .                  | . | . |
| .            | .                  | .                  | . | .                  | .                  | . | . |
| Vv13g0636    | Tc10_g005160       | .                  | . | Gorai.011G240900.1 | .                  | . | . |
| .            | .                  | .                  | . | .                  | .                  | . | . |
| Vv13g0637    | Tc10_g005170       | .                  | . | .                  | Gorai.009G314700.1 | . | . |
| .            | .                  | .                  | . | .                  | .                  | . | . |
| Vv13g0638    | Tc10_g005180       | .                  | . | .                  | Gorai.             | . | . |
| 010G204900.1 | .                  | .                  | . | .                  | .                  | . | . |
| Vv13g0639    | Tc10_g005190       | Gorai.013G026300.1 | . | .                  | Gorai.             | . | . |
| 011G240800.1 | Gorai.009G314600.1 | .                  | . | .                  | .                  | . | . |
| .            | .                  | .                  | . | .                  | .                  | . | . |
| Vv13g0640    | .                  | .                  | . | .                  | .                  | . | . |
| .            | .                  | .                  | . | .                  | .                  | . | . |
| Vv13g0641    | Tc10_g005200       | .                  | . | .                  | .                  | . | . |
| .            | .                  | .                  | . | .                  | .                  | . | . |
| Vv13g0642    | Tc10_g005210       | .                  | . | .                  | .                  | . | . |
| .            | .                  | .                  | . | .                  | .                  | . | . |
| Vv13g0643    | .                  | .                  | . | .                  | Gorai.             | . | . |
| 012G004000.1 | .                  | .                  | . | .                  | .                  | . | . |
| Vv13g0644    | .                  | .                  | . | .                  | Gorai.010G205000.1 | . | . |
| .            | Vv08g0805          | Tc05_g006140       | . | .                  | .                  | . | . |
| .            | Vv06g0367          | .                  | . | .                  | Gorai.             | . | . |
| 001G130800.1 | Gorai.009G078700.1 | .                  | . | .                  | .                  | . | . |
| Vv13g0645    | .                  | .                  | . | .                  | .                  | . | . |
| .            | .                  | .                  | . | .                  | .                  | . | . |
| Vv13g0646    | Tc10_g005220       | .                  | . | Gorai.011G240700.1 | .                  | . | . |
| .            | Gorai.010G205100.1 | Gorai.012G004100.1 | . | .                  | Vv08g0804          | . | . |
| .            | Tc05_g006150       | .                  | . | .                  | .                  | . | . |
| Vv06g0366    | Tc09_g025760       | .                  | . | .                  | Gorai.             | . | . |
| 009G078600.1 | .                  | .                  | . | .                  | .                  | . | . |
| Vv13g0647    | .                  | .                  | . | .                  | .                  | . | . |
| .            | .                  | .                  | . | .                  | Vv06g0365          | . | . |
| .            | .                  | .                  | . | .                  | .                  | . | . |



|           |                    |   |   |                    |   |
|-----------|--------------------|---|---|--------------------|---|
| Vv13g0648 | Tc10_g005230       | . | . | Gorai.009G314500.1 | . |
| .         | Gorai.012G004200.1 | . | . | .                  | . |
| .         | .                  | . | . | .                  | . |
| .         | .                  | . | . | .                  | . |
| Vv13g0649 | Tc10_g005240       | . | . | .                  | . |
| .         | .                  | . | . | .                  | . |
| .         | .                  | . | . | .                  | . |
| Vv13g0650 | .                  | . | . | .                  | . |
| .         | .                  | . | . | .                  | . |
| .         | .                  | . | . | .                  | . |
| Vv13g0651 | Tc10_g005250       | . | . | Gorai.011G240600.1 | . |
| .         | Gorai.012G004300.1 | . | . | .                  | . |
| .         | .                  | . | . | .                  | . |
| .         | .                  | . | . | .                  | . |
| Vv13g0652 | Tc10_g005260       | . | . | Gorai.011G240500.1 | . |
| .         | .                  | . | . | .                  | . |
| .         | .                  | . | . | .                  | . |
| Vv13g0653 | .                  | . | . | .                  | . |
| .         | .                  | . | . | .                  | . |
| .         | .                  | . | . | .                  | . |
| Vv13g0654 | Tc10_g005330       | . | . | Gorai.009G314300.1 | . |
| .         | .                  | . | . | .                  | . |
| .         | .                  | . | . | .                  | . |
| Vv13g0655 | Tc10_g005350       | . | . | Gorai.011G240400.1 | . |
| .         | .                  | . | . | .                  | . |
| .         | .                  | . | . | .                  | . |
| Vv13g0656 | .                  | . | . | .                  | . |
| .         | .                  | . | . | .                  | . |
| .         | .                  | . | . | .                  | . |
| Vv13g0657 | Tc10_g005360       | . | . | Gorai.011G240300.1 | . |
| .         | .                  | . | . | .                  | . |
| .         | .                  | . | . | .                  | . |
| Vv13g0658 | .                  | . | . | .                  | . |
| .         | .                  | . | . | .                  | . |
| .         | .                  | . | . | .                  | . |
| Vv13g0659 | .                  | . | . | .                  | . |
| .         | .                  | . | . | .                  | . |
| .         | .                  | . | . | .                  | . |
| Vv13g0660 | .                  | . | . | .                  | . |
| .         | .                  | . | . | .                  | . |
| .         | .                  | . | . | .                  | . |
| Vv13g0661 | .                  | . | . | .                  | . |
| .         | .                  | . | . | .                  | . |
| .         | .                  | . | . | .                  | . |
| Vv13g0662 | .                  | . | . | .                  | . |
| .         | .                  | . | . | .                  | . |
| .         | .                  | . | . | .                  | . |
| Vv13g0663 | .                  | . | . | .                  | . |
| .         | .                  | . | . | .                  | . |
| .         | .                  | . | . | .                  | . |

|                    |                    |                    |                    |           |
|--------------------|--------------------|--------------------|--------------------|-----------|
| Vv13g0664          | Tc10_g005370       | .                  | Gorai.011G240100.1 | .         |
| Gorai.009G314200.1 | .                  | .                  | .                  | .         |
| .                  | .                  | Vv06g0350          | .                  | .         |
| .                  | Gorai.009G103400.1 | .                  | .                  | .         |
| Vv13g0665          | Tc10_g005380       | .                  | Gorai.011G240000.1 | .         |
| .                  | Gorai.012G004400.1 | .                  | .                  | .         |
| .                  | .                  | .                  | .                  | .         |
| Vv13g0666          | Tc10_g005390       | .                  | .                  | .         |
| .                  | .                  | .                  | .                  | .         |
| Vv13g0667          | .                  | .                  | .                  | .         |
| .                  | .                  | .                  | .                  | .         |
| Vv13g0668          | Tc10_g005420       | .                  | .                  | .         |
| .                  | .                  | .                  | .                  | .         |
| Vv06g0340          | Tc09_g033360       | .                  | .                  | Gorai.    |
| 009G106600.1       | Gorai.003G141300.1 | .                  | .                  | .         |
| Vv13g0669          | Tc10_g005430       | .                  | .                  | Gorai.    |
| 010G205300.1       | .                  | .                  | .                  | .         |
| .                  | .                  | .                  | .                  | .         |
| Vv13g0670          | Tc10_g005440       | .                  | .                  | .         |
| Gorai.012G004700.1 | .                  | .                  | .                  | .         |
| .                  | .                  | .                  | .                  | .         |
| Vv13g0671          | .                  | .                  | .                  | .         |
| .                  | .                  | .                  | .                  | .         |
| .                  | .                  | .                  | .                  | .         |
| Vv13g0672          | Gorai.013G027300.1 | .                  | .                  | .         |
| .                  | Vv08g0781          | Tc05_g006410       | Gorai.006G166700.1 | .         |
| .                  | .                  | .                  | .                  | .         |
| .                  | .                  | .                  | .                  | .         |
| Vv13g0673          | Tc10_g005470       | .                  | Gorai.011G239400.1 | .         |
| .                  | .                  | .                  | .                  | .         |
| .                  | .                  | .                  | .                  | .         |
| Vv13g0674          | .                  | .                  | .                  | .         |
| .                  | .                  | .                  | .                  | .         |
| .                  | .                  | .                  | .                  | .         |
| Vv13g0675          | .                  | .                  | .                  | Vv06g0331 |
| .                  | .                  | .                  | .                  | .         |
| Tc09_g033470       | Gorai.013G266900.1 | .                  | .                  | .         |
| Gorai.009G107500.1 | Gorai.003G142200.1 | .                  | .                  | .         |
| Vv13g0676          | Gorai.013G027400.1 | .                  | .                  | .         |
| .                  | Vv08g0777          | Tc05_g006440       | .                  | .         |
| Gorai.009G417500.1 | .                  | Vv06g0330          | .                  | .         |
| Tc09_g033480       | .                  | Gorai.009G107600.1 | .                  | .         |
| Gorai.003G142300.1 | .                  | .                  | .                  | .         |
| Vv13g0677          | Tc10_g005520       | .                  | .                  | .         |
| .                  | .                  | .                  | .                  | .         |
| .                  | .                  | .                  | .                  | .         |
| Vv13g0678          | Tc10_g005550       | .                  | Gorai.011G239300.1 | .         |

|                    |                    |                    |                    |        |   |   |   |
|--------------------|--------------------|--------------------|--------------------|--------|---|---|---|
| .                  | .                  | .                  | .                  | .      | . | . | . |
| Vv13g0679          | Tc10_g005570       | .                  | Gorai.011G239000.1 | .      | . | . | . |
| .                  | .                  | .                  | .                  | .      | . | . | . |
| Vv13g0680          | Tc10_g005610       | .                  | Gorai.011G238900.1 | .      | . | . | . |
| .                  | Gorai.012G004800.1 | .                  | Vv08g0776          | .      | . | . | . |
| Tc05_g006450       | Gorai.006G166400.1 | .                  | .                  | .      | . | . | . |
| .                  | Vv06g0326          | Tc09_g033510       | Gorai.013G267100.1 | .      | . | . | . |
| .                  | Gorai.009G107800.1 | .                  | Gorai.006G120400.1 | .      | . | . | . |
| Vv13g0681          | Tc10_g005620       | .                  | Gorai.011G238800.1 | .      | . | . | . |
| Gorai.009G313700.1 | .                  | .                  | .                  | .      | . | . | . |
| .                  | .                  | Vv06g0325          | Tc09_g033520       | .      | . | . | . |
| Gorai.013G267200.1 | .                  | .                  | Gorai.009G107900.1 | .      | . | . | . |
| Gorai.003G142600.1 | .                  | .                  | .                  | .      | . | . | . |
| Vv13g0682          | Tc10_g005630       | .                  | Gorai.009G313600.1 | .      | . | . | . |
| .                  | Gorai.010G205600.1 | .                  | .                  | .      | . | . | . |
| .                  | .                  | Vv06g0323          | Tc09_g033540       | .      | . | . | . |
| .                  | .                  | Gorai.009G108000.1 | Gorai.003G142800.1 | .      | . | . | . |
| Vv13g0683          | Tc10_g005640       | .                  | Gorai.011G238700.1 | .      | . | . | . |
| Gorai.009G313500.1 | .                  | .                  | .                  | .      | . | . | . |
| .                  | .                  | .                  | .                  | .      | . | . | . |
| .                  | .                  | .                  | .                  | .      | . | . | . |
| Vv13g0684          | Tc10_g005650       | Gorai.013G027500.1 | Gorai.             | .      | . | . | . |
| 011G238600.1       | .                  | .                  | Vv08g0775          | .      | . | . | . |
| Tc05_g006470       | .                  | .                  | Gorai.009G417400.1 | .      | . | . | . |
| .                  | .                  | .                  | .                  | .      | . | . | . |
| Vv13g0685          | Tc10_g005670       | .                  | Gorai.             | .      | . | . | . |
| 010G205700.1       | .                  | .                  | .                  | .      | . | . | . |
| .                  | .                  | .                  | .                  | .      | . | . | . |
| Vv13g0686          | Tc10_g005680       | .                  | .                  | .      | . | . | . |
| .                  | .                  | .                  | .                  | .      | . | . | . |
| .                  | .                  | .                  | .                  | .      | . | . | . |
| Vv13g0687          | Tc10_g005690       | .                  | Gorai.011G238500.1 | .      | . | . | . |
| .                  | Gorai.012G005000.1 | .                  | .                  | .      | . | . | . |
| .                  | .                  | .                  | .                  | .      | . | . | . |
| .                  | .                  | .                  | .                  | .      | . | . | . |
| Vv13g0688          | Tc10_g005730       | .                  | Gorai.011G238400.1 | .      | . | . | . |
| .                  | Vv08g0763          | .                  | Tc05_g006550       | Gorai. | . | . | . |
| 006G166000.1       | Gorai.002G248000.1 | .                  | Gorai.009G416300.1 | .      | . | . | . |
| .                  | Gorai.007G373600.1 | Vv06g0312          | .                  | .      | . | . | . |
| .                  | Gorai.006G166000.1 | .                  | .                  | .      | . | . | . |
| Vv13g0689          | .                  | .                  | Gorai.009G313300.1 | .      | . | . | . |
| .                  | .                  | .                  | .                  | .      | . | . | . |
| .                  | .                  | .                  | .                  | .      | . | . | . |
| Vv13g0690          | .                  | .                  | .                  | .      | . | . | . |
| .                  | .                  | .                  | .                  | .      | . | . | . |
| .                  | .                  | .                  | .                  | .      | . | . | . |
| Vv13g0691          | .                  | .                  | .                  | .      | . | . | . |
| .                  | .                  | .                  | .                  | .      | . | . | . |

|                    |                    |                    |                    |                    |   |   |
|--------------------|--------------------|--------------------|--------------------|--------------------|---|---|
| Vv13g0692          | .                  | .                  | .                  | .                  | . | . |
| Vv08g0729          | .                  | .                  | .                  | .                  | . | . |
| Vv13g0693          | Tc10_g005740       | .                  | .                  | .                  | . | . |
| .                  | .                  | .                  | .                  | .                  | . | . |
| Vv13g0694          | .                  | .                  | .                  | .                  | . | . |
| .                  | .                  | .                  | .                  | .                  | . | . |
| Vv13g0695          | Tc10_g005760       | .                  | .                  | .                  | . | . |
| .                  | .                  | .                  | .                  | .                  | . | . |
| Vv13g0696          | Tc10_g005770       | .                  | .                  | Gorai.009G313100.1 | . | . |
| .                  | .                  | .                  | .                  | .                  | . | . |
| Vv13g0697          | Tc10_g005780       | .                  | .                  | .                  | . | . |
| .                  | .                  | .                  | .                  | .                  | . | . |
| Vv13g0698          | .                  | .                  | .                  | .                  | . | . |
| .                  | .                  | .                  | .                  | .                  | . | . |
| Vv13g0699          | .                  | .                  | .                  | Gorai.009G313000.1 | . | . |
| .                  | .                  | .                  | .                  | .                  | . | . |
| Vv13g0700          | Tc10_g005950       | .                  | .                  | .                  | . | . |
| .                  | .                  | .                  | .                  | .                  | . | . |
| Vv13g0701          | .                  | .                  | Gorai.011G238300.1 | Gorai.             | . | . |
| 009G312500.1       | .                  | .                  | Vv06g0295          | .                  | . | . |
| .                  | Gorai.009G109800.1 | .                  | .                  | .                  | . | . |
| Vv13g0702          | Tc10_g005970       | .                  | Gorai.011G238200.1 | .                  | . | . |
| .                  | .                  | .                  | .                  | .                  | . | . |
| Vv13g0703          | Tc10_g005980       | .                  | Gorai.011G238100.1 | .                  | . | . |
| Gorai.009G312200.1 | .                  | .                  | .                  | .                  | . | . |
| .                  | .                  | .                  | .                  | .                  | . | . |
| Vv13g0704          | .                  | .                  | .                  | .                  | . | . |
| Vv06g0293          | Tc09_g033690       | Gorai.013G268100.1 | Gorai.             | .                  | . | . |
| 001G134600.1       | .                  | Gorai.006G165400.1 | .                  | .                  | . | . |
| Vv13g0705          | .                  | .                  | Gorai.009G312000.1 | .                  | . | . |
| .                  | .                  | .                  | .                  | .                  | . | . |
| Vv13g0706          | Tc10_g006020       | .                  | .                  | .                  | . | . |
| Gorai.012G005300.1 | .                  | .                  | .                  | .                  | . | . |
| Vv13g0707          | .                  | .                  | .                  | .                  | . | . |

|                    |                    |   |   |                    |                    |        |   |
|--------------------|--------------------|---|---|--------------------|--------------------|--------|---|
| .                  | .                  | . | . | .                  | .                  | .      | . |
| .                  | .                  | . | . | .                  | .                  | .      | . |
| Vv13g0708          | Tc10_g006040       | . | . | .                  | .                  | .      | . |
| Gorai.012G005400.1 | .                  | . | . | .                  | .                  | .      | . |
| .                  | .                  | . | . | .                  | .                  | .      | . |
| Vv13g0709          | Tc10_g006060       | . | . | .                  | Gorai.009G311900.1 | .      | . |
| .                  | .                  | . | . | .                  | .                  | .      | . |
| .                  | .                  | . | . | .                  | .                  | .      | . |
| Vv13g0710          | Tc10_g006080       | . | . | Gorai.011G238000.1 | .                  | .      | . |
| Gorai.009G311500.1 | .                  | . | . | Vv08g1469          | .                  | .      | . |
| Tc05_g014680       | .                  | . | . | .                  | .                  | .      | . |
| .                  | .                  | . | . | .                  | .                  | .      | . |
| Vv13g0711          | Tc10_g006110       | . | . | Gorai.011G237900.1 | .                  | .      | . |
| .                  | .                  | . | . | .                  | .                  | .      | . |
| .                  | .                  | . | . | .                  | .                  | .      | . |
| Vv13g0712          | Tc10_g006250       | . | . | .                  | .                  | .      | . |
| .                  | .                  | . | . | .                  | .                  | .      | . |
| .                  | .                  | . | . | .                  | .                  | .      | . |
| Vv13g0713          | Tc10_g006320       | . | . | Gorai.011G237300.1 | .                  | .      | . |
| .                  | .                  | . | . | .                  | .                  | .      | . |
| .                  | .                  | . | . | .                  | .                  | .      | . |
| Vv13g0714          | .                  | . | . | .                  | .                  | Gorai. | . |
| 012G005800.1       | .                  | . | . | .                  | .                  | .      | . |
| .                  | .                  | . | . | .                  | .                  | .      | . |
| Vv13g0715          | Tc10_g006330       | . | . | .                  | .                  | .      | . |
| .                  | .                  | . | . | .                  | .                  | .      | . |
| .                  | .                  | . | . | .                  | .                  | .      | . |
| Vv13g0716          | Tc10_g006340       | . | . | .                  | .                  | Gorai. | . |
| 010G205900.1       | Gorai.012G005900.1 | . | . | .                  | .                  | .      | . |
| .                  | .                  | . | . | .                  | .                  | .      | . |
| .                  | .                  | . | . | .                  | .                  | .      | . |
| Vv13g0717          | Tc10_g006350       | . | . | Gorai.011G237100.1 | .                  | .      | . |
| .                  | .                  | . | . | .                  | .                  | .      | . |
| .                  | .                  | . | . | .                  | .                  | .      | . |
| Vv13g0718          | Tc10_g006370       | . | . | Gorai.011G236400.1 | .                  | .      | . |
| .                  | Gorai.012G006000.1 | . | . | .                  | .                  | .      | . |
| .                  | .                  | . | . | .                  | .                  | .      | . |
| .                  | .                  | . | . | .                  | .                  | .      | . |
| Vv13g0719          | .                  | . | . | .                  | .                  | .      | . |
| .                  | .                  | . | . | .                  | .                  | .      | . |
| .                  | .                  | . | . | .                  | .                  | .      | . |
| Vv13g0720          | .                  | . | . | .                  | .                  | .      | . |
| .                  | .                  | . | . | .                  | .                  | .      | . |
| .                  | .                  | . | . | .                  | .                  | .      | . |
| Vv13g0721          | Tc10_g006430       | . | . | Gorai.011G236100.1 | .                  | .      | . |
| .                  | .                  | . | . | .                  | .                  | .      | . |
| .                  | .                  | . | . | .                  | .                  | .      | . |
| Vv13g0722          | .                  | . | . | .                  | .                  | .      | . |
| .                  | .                  | . | . | .                  | .                  | .      | . |
| .                  | .                  | . | . | .                  | .                  | .      | . |

|                    |              |   |                    |                    |        |
|--------------------|--------------|---|--------------------|--------------------|--------|
| Vv13g0723          | Tc10_g006440 | . | .                  | .                  | Gorai. |
| 010G206000.1       | .            | . | .                  | .                  | .      |
| Vv13g0724          | Tc10_g006450 | . | Gorai.011G236000.1 | .                  | .      |
| Gorai.010G207000.1 | .            | . | .                  | .                  | .      |
| Vv13g0725          | Tc10_g006530 | . | .                  | Gorai.009G310600.1 | .      |
| Vv13g0726          | .            | . | .                  | .                  | .      |
| Vv13g0727          | .            | . | .                  | .                  | .      |
| Vv13g0728          | .            | . | .                  | .                  | .      |
| Vv13g0729          | .            | . | .                  | .                  | .      |
| Vv13g0730          | .            | . | .                  | .                  | .      |
| Vv13g0731          | .            | . | .                  | .                  | .      |
| Vv13g0732          | .            | . | .                  | .                  | .      |
| Vv13g0733          | .            | . | .                  | .                  | .      |
| Vv13g0734          | .            | . | .                  | .                  | .      |
| Vv13g0735          | .            | . | .                  | .                  | .      |
| Vv13g0736          | .            | . | .                  | .                  | .      |
| Vv13g0737          | .            | . | .                  | .                  | .      |
| Vv13g0738          | .            | . | .                  | .                  | .      |
| Vv13g0739          | .            | . | .                  | .                  | .      |

|           |                    |  |                    |                    |  |  |
|-----------|--------------------|--|--------------------|--------------------|--|--|
| Vv13g0740 |                    |  |                    |                    |  |  |
| Vv13g0741 |                    |  | Gorai.011G235000.1 |                    |  |  |
| Vv13g0742 | Vv08g1430          |  | Gorai.011G234900.1 |                    |  |  |
|           |                    |  | Tc05_g007230       | Gorai.006G161600.1 |  |  |
| Vv13g0743 |                    |  |                    |                    |  |  |
| Vv13g0744 |                    |  |                    |                    |  |  |
| Vv13g0745 |                    |  |                    |                    |  |  |
| Vv13g0746 |                    |  |                    |                    |  |  |
| Vv13g0747 |                    |  |                    |                    |  |  |
| Vv13g0748 |                    |  |                    |                    |  |  |
| Vv13g0749 | Tc10_g006570       |  |                    |                    |  |  |
| Vv13g0750 | Tc10_g006590       |  |                    |                    |  |  |
| Vv13g0751 |                    |  |                    |                    |  |  |
| Vv13g0752 | Tc10_g006620       |  |                    |                    |  |  |
| Vv13g0753 | Tc10_g006910       |  |                    |                    |  |  |
| Vv13g0754 | Tc10_g006940       |  | Gorai.011G234400.1 |                    |  |  |
|           | Gorai.012G006900.1 |  |                    |                    |  |  |
| Vv13g0755 | Tc10_g006970       |  |                    |                    |  |  |

|                    |                    |   |   |                    |                    |   |   |
|--------------------|--------------------|---|---|--------------------|--------------------|---|---|
| .                  | .                  | . | . | .                  | .                  | . | . |
| .                  | .                  | . | . | .                  | .                  | . | . |
| Vv13g0756          | Tc10_g006980       | . | . | .                  | .                  | . | . |
| .                  | .                  | . | . | .                  | .                  | . | . |
| .                  | .                  | . | . | .                  | .                  | . | . |
| Vv13g0757          | .                  | . | . | .                  | .                  | . | . |
| .                  | .                  | . | . | .                  | .                  | . | . |
| .                  | .                  | . | . | .                  | .                  | . | . |
| Vv13g0758          | .                  | . | . | Gorai.009G310500.1 | .                  | . | . |
| .                  | .                  | . | . | .                  | .                  | . | . |
| .                  | .                  | . | . | .                  | .                  | . | . |
| Vv13g0759          | Tc10_g007000       | . | . | .                  | Gorai.009G309300.1 | . | . |
| .                  | Gorai.012G007000.1 | . | . | .                  | .                  | . | . |
| .                  | .                  | . | . | .                  | .                  | . | . |
| .                  | .                  | . | . | .                  | .                  | . | . |
| Vv13g0760          | Tc10_g007040       | . | . | .                  | Gorai.009G309000.1 | . | . |
| .                  | .                  | . | . | .                  | .                  | . | . |
| .                  | .                  | . | . | .                  | .                  | . | . |
| Vv13g0761          | Tc10_g007050       | . | . | .                  | .                  | . | . |
| Gorai.012G007300.1 | .                  | . | . | .                  | .                  | . | . |
| .                  | .                  | . | . | .                  | .                  | . | . |
| Vv13g0762          | Tc10_g007060       | . | . | .                  | .                  | . | . |
| Gorai.012G007500.1 | .                  | . | . | .                  | .                  | . | . |
| .                  | .                  | . | . | .                  | .                  | . | . |
| Vv13g0763          | .                  | . | . | .                  | .                  | . | . |
| .                  | .                  | . | . | .                  | .                  | . | . |
| .                  | .                  | . | . | .                  | .                  | . | . |
| Vv13g0764          | .                  | . | . | Gorai.011G234300.1 | .                  | . | . |
| .                  | .                  | . | . | .                  | .                  | . | . |
| .                  | .                  | . | . | .                  | .                  | . | . |
| Vv13g0765          | Tc10_g007080       | . | . | .                  | Gorai.009G308900.1 | . | . |
| .                  | .                  | . | . | .                  | .                  | . | . |
| .                  | .                  | . | . | .                  | .                  | . | . |
| Vv13g0766          | .                  | . | . | .                  | .                  | . | . |
| .                  | .                  | . | . | .                  | .                  | . | . |
| .                  | .                  | . | . | .                  | .                  | . | . |
| Vv13g0767          | .                  | . | . | .                  | .                  | . | . |
| .                  | .                  | . | . | .                  | .                  | . | . |
| .                  | .                  | . | . | .                  | .                  | . | . |
| Vv13g0768          | .                  | . | . | .                  | .                  | . | . |
| .                  | .                  | . | . | .                  | .                  | . | . |
| .                  | .                  | . | . | .                  | .                  | . | . |
| Vv13g0769          | Tc10_g007170       | . | . | Gorai.011G234000.1 | .                  | . | . |
| Gorai.009G308500.1 | Gorai.010G207600.1 | . | . | .                  | .                  | . | . |
| .                  | .                  | . | . | .                  | .                  | . | . |
| .                  | .                  | . | . | .                  | .                  | . | . |
| Vv13g0770          | Tc10_g007200       | . | . | .                  | .                  | . | . |
| .                  | .                  | . | . | .                  | .                  | . | . |
| .                  | .                  | . | . | .                  | .                  | . | . |
| Vv13g0771          | Tc10_g007210       | . | . | .                  | .                  | . | . |



|           |              |   |                    |                    |   |   |
|-----------|--------------|---|--------------------|--------------------|---|---|
| .         | .            | . | .                  | .                  | . | . |
| .         | .            | . | .                  | .                  | . | . |
| Vv13g0772 | Tc10_g007220 | . | .                  | Gorai.009G308200.1 | . | . |
| .         | .            | . | .                  | .                  | . | . |
| .         | .            | . | .                  | .                  | . | . |
| Vv13g0773 | .            | . | Gorai.011G233900.1 | .                  | . | . |
| .         | .            | . | .                  | .                  | . | . |
| .         | .            | . | .                  | .                  | . | . |
| Vv13g0774 | Tc10_g007710 | . | Gorai.011G233700.1 | .                  | . | . |
| .         | Vv08g1392    | . | .                  | .                  | . | . |
| .         | .            | . | .                  | .                  | . | . |
| .         | .            | . | .                  | .                  | . | . |
| Vv13g0775 | .            | . | .                  | .                  | . | . |
| .         | .            | . | .                  | .                  | . | . |
| .         | .            | . | .                  | .                  | . | . |
| Vv13g0776 | .            | . | .                  | .                  | . | . |
| .         | .            | . | .                  | .                  | . | . |
| .         | .            | . | .                  | .                  | . | . |
| Vv13g0777 | .            | . | .                  | .                  | . | . |
| .         | .            | . | .                  | .                  | . | . |
| .         | .            | . | .                  | .                  | . | . |
| Vv13g0778 | .            | . | .                  | .                  | . | . |
| .         | .            | . | .                  | .                  | . | . |
| .         | .            | . | .                  | .                  | . | . |
| Vv13g0779 | .            | . | .                  | .                  | . | . |
| .         | .            | . | .                  | .                  | . | . |
| .         | .            | . | .                  | .                  | . | . |
| Vv13g0780 | .            | . | .                  | .                  | . | . |
| .         | .            | . | .                  | .                  | . | . |
| .         | .            | . | .                  | .                  | . | . |
| Vv13g0781 | .            | . | .                  | .                  | . | . |
| .         | .            | . | .                  | .                  | . | . |
| .         | .            | . | .                  | .                  | . | . |
| Vv13g0782 | Tc10_g015110 | . | .                  | .                  | . | . |
| .         | .            | . | .                  | .                  | . | . |
| .         | .            | . | .                  | .                  | . | . |
| Vv13g0783 | .            | . | .                  | .                  | . | . |
| .         | .            | . | .                  | .                  | . | . |
| .         | .            | . | .                  | .                  | . | . |
| Vv13g0784 | Tc10_g007850 | . | .                  | .                  | . | . |
| .         | .            | . | .                  | .                  | . | . |
| .         | .            | . | .                  | .                  | . | . |
| Vv13g0785 | Tc10_g007880 | . | .                  | Gorai.009G307600.1 | . | . |
| .         | .            | . | .                  | .                  | . | . |
| .         | .            | . | .                  | .                  | . | . |
| Vv13g0786 | .            | . | .                  | .                  | . | . |
| .         | .            | . | .                  | .                  | . | . |
| .         | .            | . | .                  | .                  | . | . |
| Vv13g0787 | Tc10_g007950 | . | .                  | .                  | . | . |
| .         | .            | . | .                  | .                  | . | . |

|           |              |   |                    |                    |   |   |   |
|-----------|--------------|---|--------------------|--------------------|---|---|---|
| Vv13g0788 | .            | . | .                  | .                  | . | . | . |
| .         | .            | . | .                  | .                  | . | . | . |
| Vv13g0789 | .            | . | .                  | .                  | . | . | . |
| .         | .            | . | .                  | .                  | . | . | . |
| Vv13g0790 | .            | . | .                  | .                  | . | . | . |
| .         | .            | . | .                  | .                  | . | . | . |
| Vv13g0791 | Tc10_g008060 | . | .                  | .                  | . | . | . |
| .         | .            | . | .                  | .                  | . | . | . |
| Vv13g0792 | .            | . | .                  | .                  | . | . | . |
| .         | .            | . | .                  | .                  | . | . | . |
| Vv13g0793 | .            | . | .                  | .                  | . | . | . |
| .         | .            | . | .                  | .                  | . | . | . |
| Vv13g0794 | Tc10_g008100 | . | .                  | Gorai.009G307400.1 | . | . | . |
| .         | .            | . | .                  | .                  | . | . | . |
| Vv13g0795 | .            | . | .                  | .                  | . | . | . |
| .         | .            | . | .                  | .                  | . | . | . |
| Vv13g0796 | .            | . | .                  | .                  | . | . | . |
| .         | .            | . | .                  | .                  | . | . | . |
| Vv13g0797 | .            | . | .                  | .                  | . | . | . |
| .         | .            | . | .                  | .                  | . | . | . |
| Vv13g0798 | .            | . | .                  | .                  | . | . | . |
| .         | .            | . | .                  | .                  | . | . | . |
| Vv13g0799 | .            | . | .                  | .                  | . | . | . |
| .         | .            | . | .                  | .                  | . | . | . |
| Vv13g0800 | Tc10_g008510 | . | .                  | Gorai.009G307300.1 | . | . | . |
| .         | .            | . | .                  | .                  | . | . | . |
| Vv13g0801 | Tc10_g009130 | . | .                  | .                  | . | . | . |
| .         | .            | . | .                  | .                  | . | . | . |
| Vv13g0802 | .            | . | Gorai.011G233500.1 | .                  | . | . | . |
| .         | .            | . | .                  | .                  | . | . | . |
| Vv13g0803 | .            | . | .                  | .                  | . | . | . |
| .         | .            | . | .                  | .                  | . | . | . |
| Vv13g0804 | Tc10_g014650 | . | .                  | .                  | . | . | . |

|                    |              |   |                    |                    |        |   |   |
|--------------------|--------------|---|--------------------|--------------------|--------|---|---|
| .                  | .            | . | .                  | .                  | .      | . | . |
| .                  | .            | . | .                  | .                  | .      | . | . |
| Vv13g0805          | .            | . | .                  | .                  | .      | . | . |
| Vv08g1357          | Tc05_g007940 | . | Gorai.006G159400.1 | .                  | Gorai. | . | . |
| 002G244300.1       | .            | . | Gorai.007G371600.1 | .                  | .      | . | . |
| .                  | .            | . | .                  | .                  | .      | . | . |
| Vv13g0806          | .            | . | .                  | .                  | .      | . | . |
| .                  | .            | . | .                  | .                  | .      | . | . |
| .                  | .            | . | .                  | .                  | .      | . | . |
| Vv13g0807          | .            | . | Gorai.011G233300.1 | .                  | .      | . | . |
| .                  | .            | . | .                  | .                  | .      | . | . |
| .                  | .            | . | .                  | .                  | .      | . | . |
| Vv13g0808          | .            | . | Gorai.011G233200.1 | .                  | .      | . | . |
| .                  | .            | . | .                  | .                  | .      | . | . |
| .                  | .            | . | .                  | .                  | .      | . | . |
| Vv13g0809          | .            | . | .                  | .                  | .      | . | . |
| .                  | .            | . | .                  | .                  | .      | . | . |
| .                  | .            | . | .                  | .                  | .      | . | . |
| Vv13g0810          | .            | . | .                  | .                  | .      | . | . |
| .                  | .            | . | .                  | .                  | .      | . | . |
| .                  | .            | . | .                  | .                  | .      | . | . |
| Vv13g0811          | .            | . | Gorai.011G233100.1 | .                  | .      | . | . |
| .                  | .            | . | .                  | .                  | .      | . | . |
| .                  | .            | . | .                  | .                  | .      | . | . |
| Vv13g0812          | .            | . | .                  | .                  | .      | . | . |
| Vv08g1353          | .            | . | Gorai.002G243800.1 | .                  | .      | . | . |
| .                  | .            | . | .                  | .                  | .      | . | . |
| Vv13g0813          | .            | . | .                  | .                  | .      | . | . |
| .                  | .            | . | .                  | .                  | .      | . | . |
| .                  | .            | . | .                  | .                  | .      | . | . |
| Vv13g0814          | .            | . | .                  | .                  | .      | . | . |
| .                  | .            | . | .                  | .                  | .      | . | . |
| .                  | .            | . | .                  | .                  | .      | . | . |
| Vv13g0815          | .            | . | Gorai.011G233000.1 | .                  | .      | . | . |
| .                  | Vv08g1352    | . | Tc05_g007990       | Gorai.006G158900.1 | .      | . | . |
| Gorai.002G243700.1 | .            | . | .                  | .                  | .      | . | . |
| .                  | .            | . | .                  | .                  | .      | . | . |
| Vv13g0816          | .            | . | .                  | .                  | .      | . | . |
| .                  | .            | . | .                  | .                  | .      | . | . |
| .                  | .            | . | .                  | .                  | .      | . | . |
| Vv13g0817          | .            | . | .                  | .                  | .      | . | . |
| .                  | .            | . | .                  | .                  | .      | . | . |
| .                  | .            | . | .                  | .                  | .      | . | . |
| Vv13g0818          | .            | . | .                  | .                  | .      | . | . |
| .                  | .            | . | .                  | .                  | .      | . | . |
| .                  | .            | . | .                  | .                  | .      | . | . |
| Vv13g0819          | .            | . | .                  | .                  | .      | . | . |
| .                  | .            | . | .                  | .                  | .      | . | . |
| .                  | .            | . | .                  | .                  | .      | . | . |
| Vv13g0820          | .            | . | .                  | .                  | .      | . | . |

|                    |              |   |                    |                    |   |
|--------------------|--------------|---|--------------------|--------------------|---|
| Vv08g1351          | Tc05_g008000 | . | .                  | .                  | . |
| Gorai.007G371500.1 | .            | . | .                  | .                  | . |
| Vv13g0821          | .            | . | .                  | .                  | . |
| .                  | .            | . | .                  | .                  | . |
| Vv13g0822          | .            | . | .                  | .                  | . |
| .                  | .            | . | .                  | .                  | . |
| Vv13g0823          | .            | . | .                  | .                  | . |
| .                  | .            | . | .                  | .                  | . |
| Vv13g0824          | .            | . | .                  | .                  | . |
| .                  | .            | . | .                  | .                  | . |
| Vv13g0825          | .            | . | .                  | .                  | . |
| .                  | .            | . | .                  | .                  | . |
| Vv13g0826          | .            | . | .                  | .                  | . |
| .                  | .            | . | .                  | .                  | . |
| Vv13g0827          | .            | . | .                  | .                  | . |
| .                  | .            | . | .                  | .                  | . |
| Vv13g0828          | .            | . | .                  | .                  | . |
| .                  | .            | . | .                  | .                  | . |
| Vv13g0829          | .            | . | .                  | .                  | . |
| .                  | .            | . | .                  | .                  | . |
| Vv13g0830          | .            | . | .                  | .                  | . |
| .                  | .            | . | .                  | .                  | . |
| Vv13g0831          | .            | . | .                  | .                  | . |
| .                  | .            | . | .                  | .                  | . |
| Vv13g0832          | Tc10_g011760 | . | .                  | Gorai.009G304700.1 | . |
| .                  | .            | . | .                  | .                  | . |
| Vv13g0833          | .            | . | .                  | .                  | . |
| .                  | .            | . | .                  | .                  | . |
| Vv13g0834          | Tc10_g011460 | . | .                  | .                  | . |
| .                  | .            | . | .                  | .                  | . |
| Vv13g0835          | .            | . | .                  | .                  | . |
| .                  | .            | . | .                  | .                  | . |
| Vv13g0836          | .            | . | Gorai.009G304600.1 | .                  | . |
| .                  | .            | . | .                  | .                  | . |

|           |              |  |  |                    |  |  |
|-----------|--------------|--|--|--------------------|--|--|
| Vv13g0837 |              |  |  |                    |  |  |
| Vv13g0838 |              |  |  | Gorai.009G302500.1 |  |  |
| Vv13g0839 |              |  |  |                    |  |  |
| Vv13g0840 |              |  |  |                    |  |  |
| Vv13g0841 | Tc10_g003050 |  |  |                    |  |  |
| Vv13g0842 |              |  |  |                    |  |  |
| Vv13g0843 |              |  |  |                    |  |  |
| Vv13g0844 | Tc10_g010120 |  |  |                    |  |  |
| Vv13g0845 |              |  |  |                    |  |  |
| Vv13g0846 | Tc10_g010250 |  |  |                    |  |  |
| Vv13g0847 | Tc10_g010670 |  |  |                    |  |  |
| Vv13g0848 |              |  |  |                    |  |  |
| Vv08g1330 | Tc05_g008200 |  |  | Gorai.002G243400.1 |  |  |
| Vv13g0849 |              |  |  |                    |  |  |
| Vv13g0850 |              |  |  |                    |  |  |
| Vv13g0851 |              |  |  |                    |  |  |
| Vv13g0852 | Tc10_g003140 |  |  | Gorai.011G232200.1 |  |  |

|              |   |   |   |   |   |        |   |
|--------------|---|---|---|---|---|--------|---|
| Vv13g0853    | . | . | . | . | . | .      | . |
| .            | . | . | . | . | . | .      | . |
| Vv13g0854    | . | . | . | . | . | .      | . |
| .            | . | . | . | . | . | .      | . |
| Vv13g0855    | . | . | . | . | . | .      | . |
| .            | . | . | . | . | . | .      | . |
| Vv13g0856    | . | . | . | . | . | .      | . |
| .            | . | . | . | . | . | .      | . |
| Vv13g0857    | . | . | . | . | . | .      | . |
| .            | . | . | . | . | . | .      | . |
| Vv13g0858    | . | . | . | . | . | .      | . |
| .            | . | . | . | . | . | .      | . |
| Vv13g0859    | . | . | . | . | . | Gorai. | . |
| 012G025000.1 | . | . | . | . | . | .      | . |
| .            | . | . | . | . | . | .      | . |
| Vv13g0860    | . | . | . | . | . | .      | . |
| .            | . | . | . | . | . | .      | . |
| Vv13g0861    | . | . | . | . | . | Gorai. | . |
| 012G024300.1 | . | . | . | . | . | .      | . |
| .            | . | . | . | . | . | .      | . |
| Vv13g0862    | . | . | . | . | . | .      | . |
| .            | . | . | . | . | . | .      | . |
| Vv13g0863    | . | . | . | . | . | .      | . |
| .            | . | . | . | . | . | .      | . |
| Vv13g0864    | . | . | . | . | . | .      | . |
| .            | . | . | . | . | . | .      | . |
| Vv13g0865    | . | . | . | . | . | .      | . |
| .            | . | . | . | . | . | .      | . |
| Vv13g0866    | . | . | . | . | . | .      | . |
| .            | . | . | . | . | . | .      | . |
| Vv13g0867    | . | . | . | . | . | .      | . |
| .            | . | . | . | . | . | .      | . |
| Vv13g0868    | . | . | . | . | . | .      | . |
| .            | . | . | . | . | . | .      | . |
| Vv13g0869    | . | . | . | . | . | .      | . |
| .            | . | . | . | . | . | .      | . |



|                    |              |   |   |                    |   |   |   |
|--------------------|--------------|---|---|--------------------|---|---|---|
| Vv13g0886          | .            | . | . | .                  | . | . | . |
| .                  | .            | . | . | .                  | . | . | . |
| Vv13g0887          | Tc10_g009000 | . | . | .                  | . | . | . |
| .                  | .            | . | . | .                  | . | . | . |
| Vv13g0888          | .            | . | . | .                  | . | . | . |
| .                  | .            | . | . | .                  | . | . | . |
| Vv13g0889          | .            | . | . | .                  | . | . | . |
| .                  | .            | . | . | .                  | . | . | . |
| Vv13g0890          | .            | . | . | .                  | . | . | . |
| .                  | .            | . | . | .                  | . | . | . |
| Vv13g0891          | .            | . | . | .                  | . | . | . |
| .                  | .            | . | . | .                  | . | . | . |
| Vv13g0892          | .            | . | . | .                  | . | . | . |
| .                  | .            | . | . | .                  | . | . | . |
| Vv13g0893          | Tc10_g009030 | . | . | Gorai.011G229600.1 | . | . | . |
| .                  | .            | . | . | .                  | . | . | . |
| Vv13g0894          | .            | . | . | .                  | . | . | . |
| .                  | .            | . | . | .                  | . | . | . |
| Vv13g0895          | .            | . | . | .                  | . | . | . |
| .                  | .            | . | . | .                  | . | . | . |
| Vv13g0896          | .            | . | . | .                  | . | . | . |
| .                  | .            | . | . | .                  | . | . | . |
| Vv13g0897          | .            | . | . | .                  | . | . | . |
| .                  | .            | . | . | .                  | . | . | . |
| Vv13g0898          | Tc10_g009120 | . | . | .                  | . | . | . |
| Gorai.012G023500.1 | .            | . | . | .                  | . | . | . |
| .                  | .            | . | . | .                  | . | . | . |
| Vv13g0899          | Tc10_g009130 | . | . | .                  | . | . | . |
| .                  | .            | . | . | .                  | . | . | . |
| Vv13g0900          | .            | . | . | .                  | . | . | . |
| .                  | .            | . | . | .                  | . | . | . |
| Vv13g0901          | .            | . | . | .                  | . | . | . |
| .                  | .            | . | . | .                  | . | . | . |
| Vv13g0902          | .            | . | . | .                  | . | . | . |
| .                  | .            | . | . | .                  | . | . | . |



|              |              |   |   |   |   |        |   |
|--------------|--------------|---|---|---|---|--------|---|
| Vv13g0903    | .            | . | . | . | . | .      | . |
| .            | .            | . | . | . | . | .      | . |
| Vv13g0904    | .            | . | . | . | . | .      | . |
| Vv08g1288    | .            | . | . | . | . | .      | . |
| .            | .            | . | . | . | . | .      | . |
| Vv13g0905    | .            | . | . | . | . | .      | . |
| .            | .            | . | . | . | . | .      | . |
| Vv13g0906    | .            | . | . | . | . | .      | . |
| .            | .            | . | . | . | . | .      | . |
| Vv13g0907    | Tc10_g000740 | . | . | . | . | .      | . |
| .            | .            | . | . | . | . | .      | . |
| Vv13g0908    | .            | . | . | . | . | .      | . |
| .            | .            | . | . | . | . | .      | . |
| Vv13g0909    | .            | . | . | . | . | .      | . |
| .            | .            | . | . | . | . | .      | . |
| Vv13g0910    | .            | . | . | . | . | .      | . |
| .            | .            | . | . | . | . | .      | . |
| Vv13g0911    | .            | . | . | . | . | .      | . |
| .            | .            | . | . | . | . | .      | . |
| Vv13g0912    | .            | . | . | . | . | Gorai. | . |
| 012G021500.1 | .            | . | . | . | . | .      | . |
| .            | .            | . | . | . | . | .      | . |
| Vv13g0913    | .            | . | . | . | . | .      | . |
| .            | .            | . | . | . | . | .      | . |
| Vv13g0914    | Tc10_g000360 | . | . | . | . | .      | . |
| .            | .            | . | . | . | . | .      | . |
| Vv13g0915    | .            | . | . | . | . | .      | . |
| .            | .            | . | . | . | . | .      | . |
| Vv13g0916    | .            | . | . | . | . | .      | . |
| .            | .            | . | . | . | . | .      | . |
| Vv13g0917    | .            | . | . | . | . | .      | . |
| .            | .            | . | . | . | . | .      | . |
| Vv13g0918    | .            | . | . | . | . | .      | . |
| .            | .            | . | . | . | . | .      | . |
| Vv13g0919    | .            | . | . | . | . | .      | . |

|              |              |   |   |   |   |        |   |
|--------------|--------------|---|---|---|---|--------|---|
| .            | .            | . | . | . | . | .      | . |
| .            | .            | . | . | . | . | .      | . |
| Vv13g0920    | .            | . | . | . | . | .      | . |
| .            | .            | . | . | . | . | .      | . |
| Vv13g0921    | .            | . | . | . | . | .      | . |
| .            | .            | . | . | . | . | .      | . |
| Vv13g0922    | .            | . | . | . | . | .      | . |
| .            | .            | . | . | . | . | .      | . |
| Vv13g0923    | .            | . | . | . | . | .      | . |
| .            | .            | . | . | . | . | .      | . |
| Vv13g0924    | .            | . | . | . | . | .      | . |
| .            | .            | . | . | . | . | .      | . |
| Vv13g0925    | .            | . | . | . | . | Gorai. | . |
| 012G021400.1 | .            | . | . | . | . | .      | . |
| .            | .            | . | . | . | . | .      | . |
| Vv13g0926    | .            | . | . | . | . | .      | . |
| .            | .            | . | . | . | . | .      | . |
| Vv13g0927    | .            | . | . | . | . | .      | . |
| .            | .            | . | . | . | . | .      | . |
| Vv13g0928    | .            | . | . | . | . | .      | . |
| .            | .            | . | . | . | . | .      | . |
| Vv13g0929    | .            | . | . | . | . | .      | . |
| .            | .            | . | . | . | . | .      | . |
| Vv13g0930    | .            | . | . | . | . | .      | . |
| .            | .            | . | . | . | . | .      | . |
| Vv13g0931    | .            | . | . | . | . | .      | . |
| .            | .            | . | . | . | . | .      | . |
| Vv13g0932    | .            | . | . | . | . | .      | . |
| .            | .            | . | . | . | . | .      | . |
| Vv13g0933    | .            | . | . | . | . | .      | . |
| .            | .            | . | . | . | . | .      | . |
| Vv13g0934    | Tc10_g000320 | . | . | . | . | .      | . |
| .            | .            | . | . | . | . | .      | . |
| Vv13g0935    | Tc10_g012360 | . | . | . | . | .      | . |
| .            | .            | . | . | . | . | .      | . |
| .            | .            | . | . | . | . | .      | . |

|           |              |   |   |   |                    |   |   |
|-----------|--------------|---|---|---|--------------------|---|---|
| Vv13g0936 | .            | . | . | . | .                  | . | . |
| .         | .            | . | . | . | .                  | . | . |
| Vv13g0937 | .            | . | . | . | .                  | . | . |
| .         | .            | . | . | . | .                  | . | . |
| Vv13g0938 | .            | . | . | . | .                  | . | . |
| .         | .            | . | . | . | .                  | . | . |
| Vv13g0939 | .            | . | . | . | .                  | . | . |
| .         | .            | . | . | . | .                  | . | . |
| Vv13g0940 | .            | . | . | . | .                  | . | . |
| .         | .            | . | . | . | .                  | . | . |
| Vv13g0941 | .            | . | . | . | .                  | . | . |
| .         | .            | . | . | . | .                  | . | . |
| Vv13g0942 | Tc10_g012460 | . | . | . | .                  | . | . |
| .         | .            | . | . | . | .                  | . | . |
| Vv13g0943 | Tc10_g012510 | . | . | . | Gorai.009G301100.1 | . | . |
| .         | .            | . | . | . | .                  | . | . |
| Vv13g0944 | .            | . | . | . | .                  | . | . |
| .         | .            | . | . | . | .                  | . | . |
| Vv13g0945 | .            | . | . | . | .                  | . | . |
| .         | .            | . | . | . | .                  | . | . |
| Vv13g0946 | .            | . | . | . | .                  | . | . |
| .         | .            | . | . | . | .                  | . | . |
| Vv13g0947 | .            | . | . | . | .                  | . | . |
| .         | .            | . | . | . | .                  | . | . |
| Vv13g0948 | .            | . | . | . | .                  | . | . |
| .         | .            | . | . | . | .                  | . | . |
| Vv13g0949 | .            | . | . | . | .                  | . | . |
| .         | .            | . | . | . | .                  | . | . |
| Vv13g0950 | .            | . | . | . | .                  | . | . |
| .         | .            | . | . | . | .                  | . | . |
| Vv13g0951 | Tc10_g013030 | . | . | . | Gorai.009G300000.1 | . | . |
| .         | .            | . | . | . | .                  | . | . |
| Vv13g0952 | .            | . | . | . | .                  | . | . |
| .         | .            | . | . | . | .                  | . | . |

|           |              |   |   |   |   |   |   |
|-----------|--------------|---|---|---|---|---|---|
| Vv13g0953 | .            | . | . | . | . | . | . |
| .         | .            | . | . | . | . | . | . |
| Vv13g0954 | .            | . | . | . | . | . | . |
| .         | .            | . | . | . | . | . | . |
| Vv13g0955 | .            | . | . | . | . | . | . |
| .         | .            | . | . | . | . | . | . |
| Vv13g0956 | .            | . | . | . | . | . | . |
| .         | .            | . | . | . | . | . | . |
| Vv13g0957 | Tc10_g013060 | . | . | . | . | . | . |
| .         | .            | . | . | . | . | . | . |
| Vv13g0958 | .            | . | . | . | . | . | . |
| .         | .            | . | . | . | . | . | . |
| Vv13g0959 | .            | . | . | . | . | . | . |
| .         | .            | . | . | . | . | . | . |
| Vv13g0960 | .            | . | . | . | . | . | . |
| .         | .            | . | . | . | . | . | . |
| Vv13g0961 | .            | . | . | . | . | . | . |
| .         | .            | . | . | . | . | . | . |
| Vv13g0962 | .            | . | . | . | . | . | . |
| .         | .            | . | . | . | . | . | . |
| Vv13g0963 | .            | . | . | . | . | . | . |
| .         | .            | . | . | . | . | . | . |
| Vv13g0964 | .            | . | . | . | . | . | . |
| .         | .            | . | . | . | . | . | . |
| Vv13g0965 | .            | . | . | . | . | . | . |
| .         | .            | . | . | . | . | . | . |
| Vv13g0966 | .            | . | . | . | . | . | . |
| .         | .            | . | . | . | . | . | . |
| Vv13g0967 | .            | . | . | . | . | . | . |
| .         | .            | . | . | . | . | . | . |
| Vv13g0968 | .            | . | . | . | . | . | . |
| .         | .            | . | . | . | . | . | . |
| Vv13g0969 | .            | . | . | . | . | . | . |

|              |              |   |   |                    |   |        |   |
|--------------|--------------|---|---|--------------------|---|--------|---|
| .            | .            | . | . | .                  | . | .      | . |
| .            | .            | . | . | .                  | . | .      | . |
| Vv13g0970    | .            | . | . | .                  | . | .      | . |
| .            | .            | . | . | .                  | . | .      | . |
| .            | .            | . | . | .                  | . | .      | . |
| Vv13g0971    | .            | . | . | .                  | . | Gorai. | . |
| 012G019000.1 | .            | . | . | .                  | . | .      | . |
| .            | .            | . | . | .                  | . | .      | . |
| Vv13g0972    | .            | . | . | .                  | . | .      | . |
| .            | .            | . | . | .                  | . | .      | . |
| .            | .            | . | . | .                  | . | .      | . |
| Vv13g0973    | Tc10_g000220 | . | . | .                  | . | .      | . |
| .            | .            | . | . | .                  | . | .      | . |
| .            | .            | . | . | .                  | . | .      | . |
| Vv13g0974    | Tc10_g016270 | . | . | .                  | . | .      | . |
| .            | .            | . | . | .                  | . | .      | . |
| .            | .            | . | . | .                  | . | .      | . |
| Vv13g0975    | .            | . | . | .                  | . | .      | . |
| .            | .            | . | . | .                  | . | .      | . |
| .            | .            | . | . | .                  | . | .      | . |
| Vv13g0976    | .            | . | . | .                  | . | .      | . |
| .            | .            | . | . | .                  | . | .      | . |
| .            | .            | . | . | .                  | . | .      | . |
| Vv13g0977    | .            | . | . | .                  | . | .      | . |
| .            | .            | . | . | .                  | . | .      | . |
| .            | .            | . | . | .                  | . | .      | . |
| Vv13g0978    | .            | . | . | .                  | . | .      | . |
| .            | .            | . | . | .                  | . | .      | . |
| .            | .            | . | . | .                  | . | .      | . |
| Vv13g0979    | .            | . | . | .                  | . | .      | . |
| .            | .            | . | . | .                  | . | .      | . |
| .            | .            | . | . | .                  | . | .      | . |
| Vv13g0980    | .            | . | . | .                  | . | .      | . |
| .            | .            | . | . | .                  | . | .      | . |
| .            | .            | . | . | .                  | . | .      | . |
| Vv13g0981    | .            | . | . | .                  | . | .      | . |
| .            | .            | . | . | .                  | . | .      | . |
| .            | .            | . | . | .                  | . | .      | . |
| Vv13g0982    | .            | . | . | .                  | . | .      | . |
| .            | .            | . | . | .                  | . | .      | . |
| .            | .            | . | . | .                  | . | .      | . |
| Vv13g0983    | .            | . | . | .                  | . | .      | . |
| .            | .            | . | . | .                  | . | .      | . |
| .            | .            | . | . | .                  | . | .      | . |
| Vv13g0984    | .            | . | . | .                  | . | .      | . |
| .            | .            | . | . | .                  | . | .      | . |
| .            | .            | . | . | .                  | . | .      | . |
| Vv13g0985    | .            | . | . | Gorai.009G294600.1 | . | .      | . |
| .            | .            | . | . | .                  | . | .      | . |
| .            | .            | . | . | .                  | . | .      | . |

|           |              |   |   |   |   |   |   |
|-----------|--------------|---|---|---|---|---|---|
| Vv13g0986 | .            | . | . | . | . | . | . |
| .         | .            | . | . | . | . | . | . |
| Vv13g0987 | .            | . | . | . | . | . | . |
| .         | .            | . | . | . | . | . | . |
| Vv13g0988 | .            | . | . | . | . | . | . |
| .         | .            | . | . | . | . | . | . |
| Vv13g0989 | .            | . | . | . | . | . | . |
| .         | .            | . | . | . | . | . | . |
| Vv13g0990 | .            | . | . | . | . | . | . |
| .         | .            | . | . | . | . | . | . |
| Vv13g0991 | Tc10_g016140 | . | . | . | . | . | . |
| .         | .            | . | . | . | . | . | . |
| Vv13g0992 | .            | . | . | . | . | . | . |
| .         | .            | . | . | . | . | . | . |
| Vv13g0993 | .            | . | . | . | . | . | . |
| .         | .            | . | . | . | . | . | . |
| Vv13g0994 | .            | . | . | . | . | . | . |
| .         | .            | . | . | . | . | . | . |
| Vv13g0995 | .            | . | . | . | . | . | . |
| .         | .            | . | . | . | . | . | . |
| Vv13g0996 | .            | . | . | . | . | . | . |
| .         | .            | . | . | . | . | . | . |
| Vv13g0997 | .            | . | . | . | . | . | . |
| .         | .            | . | . | . | . | . | . |
| Vv13g0998 | .            | . | . | . | . | . | . |
| .         | .            | . | . | . | . | . | . |
| Vv13g0999 | .            | . | . | . | . | . | . |
| .         | .            | . | . | . | . | . | . |
| Vv13g1000 | .            | . | . | . | . | . | . |
| .         | .            | . | . | . | . | . | . |
| Vv13g1001 | Tc10_g016130 | . | . | . | . | . | . |
| .         | .            | . | . | . | . | . | . |
| Vv13g1002 | .            | . | . | . | . | . | . |
| .         | .            | . | . | . | . | . | . |

|           |   |   |   |   |                    |   |   |
|-----------|---|---|---|---|--------------------|---|---|
| Vv13g1003 | . | . | . | . | .                  | . | . |
| .         | . | . | . | . | .                  | . | . |
| Vv13g1004 | . | . | . | . | Gorai.009G295800.1 | . | . |
| .         | . | . | . | . | .                  | . | . |
| Vv13g1005 | . | . | . | . | Gorai.009G295900.1 | . | . |
| .         | . | . | . | . | .                  | . | . |
| Vv13g1006 | . | . | . | . | .                  | . | . |
| .         | . | . | . | . | .                  | . | . |
| Vv13g1007 | . | . | . | . | Gorai.009G296000.1 | . | . |
| .         | . | . | . | . | .                  | . | . |
| Vv13g1008 | . | . | . | . | .                  | . | . |
| .         | . | . | . | . | .                  | . | . |
| Vv13g1009 | . | . | . | . | .                  | . | . |
| .         | . | . | . | . | .                  | . | . |
| Vv13g1010 | . | . | . | . | .                  | . | . |
| .         | . | . | . | . | .                  | . | . |
| Vv13g1011 | . | . | . | . | .                  | . | . |
| .         | . | . | . | . | .                  | . | . |
| Vv13g1012 | . | . | . | . | .                  | . | . |
| .         | . | . | . | . | .                  | . | . |
| Vv13g1013 | . | . | . | . | .                  | . | . |
| .         | . | . | . | . | .                  | . | . |
| Vv13g1014 | . | . | . | . | .                  | . | . |
| .         | . | . | . | . | .                  | . | . |
| Vv13g1015 | . | . | . | . | .                  | . | . |
| .         | . | . | . | . | .                  | . | . |
| Vv13g1016 | . | . | . | . | .                  | . | . |
| .         | . | . | . | . | .                  | . | . |
| Vv13g1017 | . | . | . | . | .                  | . | . |
| .         | . | . | . | . | .                  | . | . |
| Vv13g1018 | . | . | . | . | .                  | . | . |
| .         | . | . | . | . | .                  | . | . |
| Vv13g1019 | . | . | . | . | .                  | . | . |

|           |              |   |   |   |   |   |   |
|-----------|--------------|---|---|---|---|---|---|
| .         | .            | . | . | . | . | . | . |
| .         | .            | . | . | . | . | . | . |
| Vv13g1020 | .            | . | . | . | . | . | . |
| .         | .            | . | . | . | . | . | . |
| Vv13g1021 | .            | . | . | . | . | . | . |
| .         | .            | . | . | . | . | . | . |
| Vv13g1022 | .            | . | . | . | . | . | . |
| .         | .            | . | . | . | . | . | . |
| Vv13g1023 | .            | . | . | . | . | . | . |
| .         | .            | . | . | . | . | . | . |
| Vv13g1024 | .            | . | . | . | . | . | . |
| .         | .            | . | . | . | . | . | . |
| Vv13g1025 | .            | . | . | . | . | . | . |
| .         | .            | . | . | . | . | . | . |
| Vv13g1026 | .            | . | . | . | . | . | . |
| .         | .            | . | . | . | . | . | . |
| Vv13g1027 | .            | . | . | . | . | . | . |
| .         | .            | . | . | . | . | . | . |
| Vv13g1028 | .            | . | . | . | . | . | . |
| .         | .            | . | . | . | . | . | . |
| Vv13g1029 | .            | . | . | . | . | . | . |
| .         | .            | . | . | . | . | . | . |
| Vv13g1030 | .            | . | . | . | . | . | . |
| .         | .            | . | . | . | . | . | . |
| Vv13g1031 | .            | . | . | . | . | . | . |
| .         | .            | . | . | . | . | . | . |
| Vv13g1032 | .            | . | . | . | . | . | . |
| .         | .            | . | . | . | . | . | . |
| Vv13g1033 | .            | . | . | . | . | . | . |
| .         | .            | . | . | . | . | . | . |
| Vv13g1034 | Tc10_g015880 | . | . | . | . | . | . |
| .         | .            | . | . | . | . | . | . |
| Vv13g1035 | Tc10_g015870 | . | . | . | . | . | . |
| .         | .            | . | . | . | . | . | . |
| .         | .            | . | . | . | . | . | . |





|              |              |                    |                    |                    |   |
|--------------|--------------|--------------------|--------------------|--------------------|---|
| Vv13g1053    | .            | .                  | .                  | Gorai.009G295800.1 | . |
| .            | .            | .                  | .                  | .                  | . |
| Vv13g1054    | Tc10_g015910 | .                  | .                  | .                  | . |
| .            | .            | .                  | .                  | .                  | . |
| Vv13g1055    | .            | .                  | .                  | Gorai.009G295700.1 | . |
| .            | .            | .                  | .                  | .                  | . |
| Vv13g1056    | .            | .                  | .                  | Gorai.009G292700.1 | . |
| .            | .            | .                  | .                  | .                  | . |
| Vv13g1057    | Tc10_g000590 | .                  | .                  | Gorai.             | . |
| 010G192500.1 | .            | .                  | .                  | .                  | . |
| .            | .            | .                  | .                  | .                  | . |
| Vv13g1058    | .            | .                  | .                  | .                  | . |
| .            | .            | .                  | .                  | .                  | . |
| Vv13g1059    | .            | .                  | .                  | .                  | . |
| Vv14g0398    | .            | .                  | .                  | .                  | . |
| .            | .            | .                  | .                  | .                  | . |
| Vv13g1060    | Tc10_g000570 | Gorai.013G015600.1 | .                  | .                  | . |
| .            | .            | .                  | .                  | .                  | . |
| Vv13g1061    | Tc10_g000540 | .                  | Gorai.011G293500.1 | .                  | . |
| .            | .            | .                  | .                  | .                  | . |
| Vv13g1062    | Tc10_g016110 | .                  | .                  | .                  | . |
| .            | .            | .                  | .                  | .                  | . |
| Vv13g1063    | .            | .                  | .                  | .                  | . |
| .            | .            | .                  | .                  | .                  | . |
| Vv13g1064    | .            | .                  | .                  | .                  | . |
| .            | .            | .                  | .                  | .                  | . |
| Vv13g1065    | .            | .                  | .                  | .                  | . |
| .            | .            | .                  | .                  | .                  | . |
| Vv13g1066    | Tc10_g016120 | .                  | .                  | .                  | . |
| .            | .            | .                  | .                  | .                  | . |
| Vv13g1067    | Tc10_g016130 | .                  | .                  | .                  | . |
| .            | .            | .                  | .                  | .                  | . |
| Vv13g1068    | Tc10_g001330 | .                  | .                  | .                  | . |
| .            | .            | .                  | .                  | .                  | . |
| Vv13g1069    | Tc10_g001320 | .                  | .                  | .                  | . |

|           |                    |                    |   |   |   |   |   |
|-----------|--------------------|--------------------|---|---|---|---|---|
| .         | .                  | .                  | . | . | . | . | . |
| .         | .                  | .                  | . | . | . | . | . |
| Vv13g1070 | .                  | .                  | . | . | . | . | . |
| .         | .                  | .                  | . | . | . | . | . |
| Vv13g1071 | .                  | .                  | . | . | . | . | . |
| .         | .                  | .                  | . | . | . | . | . |
| Vv13g1072 | .                  | .                  | . | . | . | . | . |
| .         | .                  | .                  | . | . | . | . | . |
| Vv13g1073 | Tc10_g000500       | .                  | . | . | . | . | . |
| .         | .                  | .                  | . | . | . | . | . |
| Vv13g1074 | Tc10_g000490       | .                  | . | . | . | . | . |
| .         | .                  | .                  | . | . | . | . | . |
| Vv13g1075 | Tc10_g000480       | Gorai.013G015400.1 | . | . | . | . | . |
| .         | .                  | .                  | . | . | . | . | . |
| Vv13g1076 | Tc10_g000470       | Gorai.013G015300.1 | . | . | . | . | . |
| .         | .                  | .                  | . | . | . | . | . |
| Vv13g1077 | .                  | .                  | . | . | . | . | . |
| .         | .                  | .                  | . | . | . | . | . |
| Vv13g1078 | .                  | .                  | . | . | . | . | . |
| .         | .                  | .                  | . | . | . | . | . |
| Vv13g1079 | Tc10_g000460       | .                  | . | . | . | . | . |
| .         | .                  | .                  | . | . | . | . | . |
| Vv13g1080 | .                  | .                  | . | . | . | . | . |
| Vv14g0418 | Tc04_g023450       | .                  | . | . | . | . | . |
| .         | .                  | .                  | . | . | . | . | . |
| Vv13g1081 | .                  | .                  | . | . | . | . | . |
| Vv14g0419 | .                  | .                  | . | . | . | . | . |
| .         | .                  | .                  | . | . | . | . | . |
| Vv13g1082 | .                  | .                  | . | . | . | . | . |
| Vv14g0421 | .                  | Gorai.007G292400.1 | . | . | . | . | . |
| .         | .                  | .                  | . | . | . | . | . |
| Vv13g1083 | .                  | .                  | . | . | . | . | . |
| .         | .                  | .                  | . | . | . | . | . |
| Vv13g1084 | .                  | .                  | . | . | . | . | . |
| Vv14g0431 | Tc04_g027160       | Gorai.007G292300.1 | . | . | . | . | . |
|           | Gorai.011G183500.1 | .                  | . | . | . | . | . |
| .         | .                  | .                  | . | . | . | . | . |
| Vv13g1085 | .                  | .                  | . | . | . | . | . |
| .         | .                  | .                  | . | . | . | . | . |



|                    |              |                    |   |   |        |
|--------------------|--------------|--------------------|---|---|--------|
| Vv13g1102          | Tc10_g000440 | .                  | . | . | Gorai. |
| 010G192300.1       | .            | .                  | . | . | .      |
| .                  | .            | .                  | . | . | .      |
| Vv13g1103          | .            | .                  | . | . | .      |
| .                  | .            | .                  | . | . | .      |
| .                  | .            | .                  | . | . | .      |
| Vv13g1104          | Tc10_g000410 | Gorai.013G014900.1 | . | . | .      |
| .                  | .            | .                  | . | . | .      |
| .                  | .            | .                  | . | . | .      |
| Vv13g1105          | Tc10_g000370 | .                  | . | . | .      |
| .                  | .            | .                  | . | . | .      |
| .                  | .            | .                  | . | . | .      |
| Vv13g1106          | .            | .                  | . | . | .      |
| .                  | .            | .                  | . | . | .      |
| .                  | .            | .                  | . | . | .      |
| Vv13g1107          | .            | Gorai.011G295300.1 | . | . | .      |
| Gorai.010G192000.1 | .            | .                  | . | . | .      |
| .                  | .            | .                  | . | . | .      |
| .                  | .            | .                  | . | . | .      |
| Vv13g1108          | .            | .                  | . | . | .      |
| .                  | .            | .                  | . | . | .      |
| .                  | .            | .                  | . | . | .      |
| Vv13g1109          | Tc10_g000360 | .                  | . | . | .      |
| .                  | .            | .                  | . | . | .      |
| .                  | .            | .                  | . | . | .      |
| Vv13g1110          | Tc10_g000340 | .                  | . | . | .      |
| .                  | .            | .                  | . | . | .      |
| .                  | .            | .                  | . | . | .      |
| Vv13g1111          | Tc10_g000320 | .                  | . | . | .      |
| .                  | .            | .                  | . | . | .      |
| .                  | .            | .                  | . | . | .      |
| Vv13g1112          | .            | .                  | . | . | .      |
| .                  | .            | .                  | . | . | .      |
| .                  | .            | .                  | . | . | .      |
| Vv13g1113          | .            | .                  | . | . | .      |
| .                  | .            | .                  | . | . | .      |
| .                  | .            | .                  | . | . | .      |
| Vv13g1114          | .            | .                  | . | . | .      |
| .                  | .            | .                  | . | . | .      |
| .                  | .            | .                  | . | . | .      |
| Vv13g1115          | .            | .                  | . | . | .      |
| .                  | .            | .                  | . | . | .      |
| .                  | .            | .                  | . | . | .      |
| Vv13g1116          | .            | .                  | . | . | .      |
| .                  | .            | .                  | . | . | .      |
| .                  | .            | .                  | . | . | .      |
| Vv13g1117          | .            | .                  | . | . | .      |
| .                  | .            | .                  | . | . | .      |
| .                  | .            | .                  | . | . | .      |
| Vv13g1118          | .            | .                  | . | . | .      |

|                    |              |                    |   |   |   |   |   |
|--------------------|--------------|--------------------|---|---|---|---|---|
| .                  | .            | .                  | . | . | . | . | . |
| .                  | .            | .                  | . | . | . | . | . |
| Vv13g1119          | .            | .                  | . | . | . | . | . |
| .                  | .            | .                  | . | . | . | . | . |
| Vv13g1120          | .            | .                  | . | . | . | . | . |
| .                  | .            | .                  | . | . | . | . | . |
| Vv13g1121          | .            | .                  | . | . | . | . | . |
| .                  | .            | .                  | . | . | . | . | . |
| Vv13g1122          | .            | Gorai.013G013400.1 | . | . | . | . | . |
| Gorai.010G189600.1 | .            | .                  | . | . | . | . | . |
| .                  | .            | .                  | . | . | . | . | . |
| .                  | .            | .                  | . | . | . | . | . |
| Vv13g1123          | Tc10_g000210 | .                  | . | . | . | . | . |
| .                  | .            | .                  | . | . | . | . | . |
| Vv13g1124          | .            | .                  | . | . | . | . | . |
| .                  | .            | .                  | . | . | . | . | . |
| Vv13g1125          | .            | .                  | . | . | . | . | . |
| .                  | .            | .                  | . | . | . | . | . |
| Vv13g1126          | .            | Gorai.011G295400.1 | . | . | . | . | . |
| .                  | .            | .                  | . | . | . | . | . |
| Vv13g1127          | .            | .                  | . | . | . | . | . |
| .                  | .            | .                  | . | . | . | . | . |
| Vv13g1128          | .            | .                  | . | . | . | . | . |
| .                  | .            | .                  | . | . | . | . | . |
| Vv13g1129          | .            | .                  | . | . | . | . | . |
| .                  | .            | .                  | . | . | . | . | . |
| Vv13g1130          | .            | .                  | . | . | . | . | . |
| .                  | .            | .                  | . | . | . | . | . |
| Vv13g1131          | .            | .                  | . | . | . | . | . |
| .                  | .            | .                  | . | . | . | . | . |
| Vv13g1132          | .            | .                  | . | . | . | . | . |
| .                  | .            | .                  | . | . | . | . | . |
| Vv13g1133          | .            | .                  | . | . | . | . | . |
| .                  | .            | .                  | . | . | . | . | . |
| Vv13g1134          | .            | .                  | . | . | . | . | . |
| .                  | .            | .                  | . | . | . | . | . |

|                    |              |   |   |   |   |   |   |
|--------------------|--------------|---|---|---|---|---|---|
| Vv13g1135          | .            | . | . | . | . | . | . |
| .                  | .            | . | . | . | . | . | . |
| Vv13g1136          | .            | . | . | . | . | . | . |
| .                  | .            | . | . | . | . | . | . |
| Vv13g1137          | .            | . | . | . | . | . | . |
| .                  | .            | . | . | . | . | . | . |
| Vv13g1138          | .            | . | . | . | . | . | . |
| .                  | .            | . | . | . | . | . | . |
| Vv13g1139          | .            | . | . | . | . | . | . |
| .                  | .            | . | . | . | . | . | . |
| Vv13g1140          | .            | . | . | . | . | . | . |
| .                  | .            | . | . | . | . | . | . |
| Vv13g1141          | .            | . | . | . | . | . | . |
| .                  | .            | . | . | . | . | . | . |
| Vv13g1142          | .            | . | . | . | . | . | . |
| .                  | .            | . | . | . | . | . | . |
| Vv13g1143          | Tc10_g005330 | . | . | . | . | . | . |
| .                  | .            | . | . | . | . | . | . |
| Vv13g1144          | .            | . | . | . | . | . | . |
| .                  | .            | . | . | . | . | . | . |
| Vv13g1145          | .            | . | . | . | . | . | . |
| .                  | .            | . | . | . | . | . | . |
| Vv13g1146          | .            | . | . | . | . | . | . |
| .                  | .            | . | . | . | . | . | . |
| Vv13g1147          | .            | . | . | . | . | . | . |
| .                  | .            | . | . | . | . | . | . |
| Vv13g1148          | .            | . | . | . | . | . | . |
| .                  | .            | . | . | . | . | . | . |
| Vv13g1149          | Tc10_g006540 | . | . | . | . | . | . |
| Gorai.012G006300.1 | .            | . | . | . | . | . | . |
| .                  | .            | . | . | . | . | . | . |
| Vv13g1150          | Tc10_g005210 | . | . | . | . | . | . |
| .                  | .            | . | . | . | . | . | . |
| .                  | .            | . | . | . | . | . | . |
| Vv13g1151          | Tc10_g005200 | . | . | . | . | . | . |

|           |              |   |   |   |   |   |   |
|-----------|--------------|---|---|---|---|---|---|
| .         | .            | . | . | . | . | . | . |
| Vv13g1152 | .            | . | . | . | . | . | . |
| .         | .            | . | . | . | . | . | . |
| Vv13g1153 | .            | . | . | . | . | . | . |
| .         | .            | . | . | . | . | . | . |
| Vv13g1154 | .            | . | . | . | . | . | . |
| .         | .            | . | . | . | . | . | . |
| Vv13g1155 | .            | . | . | . | . | . | . |
| .         | .            | . | . | . | . | . | . |
| Vv13g1156 | .            | . | . | . | . | . | . |
| .         | .            | . | . | . | . | . | . |
| Vv13g1157 | .            | . | . | . | . | . | . |
| .         | .            | . | . | . | . | . | . |
| Vv13g1158 | .            | . | . | . | . | . | . |
| .         | .            | . | . | . | . | . | . |
| Vv13g1159 | .            | . | . | . | . | . | . |
| .         | .            | . | . | . | . | . | . |
| Vv13g1160 | .            | . | . | . | . | . | . |
| .         | .            | . | . | . | . | . | . |
| Vv13g1161 | .            | . | . | . | . | . | . |
| .         | .            | . | . | . | . | . | . |
| Vv13g1162 | .            | . | . | . | . | . | . |
| .         | .            | . | . | . | . | . | . |
| Vv13g1163 | .            | . | . | . | . | . | . |
| .         | .            | . | . | . | . | . | . |
| Vv13g1164 | .            | . | . | . | . | . | . |
| .         | .            | . | . | . | . | . | . |
| Vv13g1165 | Tc10_g006230 | . | . | . | . | . | . |
| .         | .            | . | . | . | . | . | . |
| Vv13g1166 | .            | . | . | . | . | . | . |
| .         | .            | . | . | . | . | . | . |
| Vv13g1167 | Tc10_g006220 | . | . | . | . | . | . |
| .         | .            | . | . | . | . | . | . |
| .         | .            | . | . | . | . | . | . |



|           |   |   |   |   |   |   |   |
|-----------|---|---|---|---|---|---|---|
| Vv13g1168 | . | . | . | . | . | . | . |
| .         | . | . | . | . | . | . | . |
| Vv13g1169 | . | . | . | . | . | . | . |
| .         | . | . | . | . | . | . | . |
| Vv13g1170 | . | . | . | . | . | . | . |
| .         | . | . | . | . | . | . | . |
| Vv13g1171 | . | . | . | . | . | . | . |
| .         | . | . | . | . | . | . | . |
| Vv13g1172 | . | . | . | . | . | . | . |
| .         | . | . | . | . | . | . | . |
| Vv13g1173 | . | . | . | . | . | . | . |
| .         | . | . | . | . | . | . | . |
| Vv13g1174 | . | . | . | . | . | . | . |
| .         | . | . | . | . | . | . | . |
| Vv13g1175 | . | . | . | . | . | . | . |
| .         | . | . | . | . | . | . | . |
| Vv13g1176 | . | . | . | . | . | . | . |
| .         | . | . | . | . | . | . | . |
| Vv13g1177 | . | . | . | . | . | . | . |
| .         | . | . | . | . | . | . | . |
| Vv13g1178 | . | . | . | . | . | . | . |
| .         | . | . | . | . | . | . | . |
| Vv13g1179 | . | . | . | . | . | . | . |
| .         | . | . | . | . | . | . | . |
| Vv13g1180 | . | . | . | . | . | . | . |
| .         | . | . | . | . | . | . | . |
| Vv13g1181 | . | . | . | . | . | . | . |
| .         | . | . | . | . | . | . | . |
| Vv13g1182 | . | . | . | . | . | . | . |
| .         | . | . | . | . | . | . | . |
| Vv13g1183 | . | . | . | . | . | . | . |
| .         | . | . | . | . | . | . | . |
| Vv13g1184 | . | . | . | . | . | . | . |
| .         | . | . | . | . | . | . | . |

|           |              |   |   |   |   |   |   |
|-----------|--------------|---|---|---|---|---|---|
| Vv13g1185 | .            | . | . | . | . | . | . |
| .         | .            | . | . | . | . | . | . |
| Vv13g1186 | .            | . | . | . | . | . | . |
| .         | .            | . | . | . | . | . | . |
| Vv13g1187 | .            | . | . | . | . | . | . |
| Vv08g1825 | .            | . | . | . | . | . | . |
| .         | .            | . | . | . | . | . | . |
| Vv13g1188 | .            | . | . | . | . | . | . |
| .         | .            | . | . | . | . | . | . |
| Vv13g1189 | .            | . | . | . | . | . | . |
| .         | .            | . | . | . | . | . | . |
| Vv13g1190 | .            | . | . | . | . | . | . |
| .         | .            | . | . | . | . | . | . |
| Vv13g1191 | .            | . | . | . | . | . | . |
| .         | .            | . | . | . | . | . | . |
| Vv13g1192 | .            | . | . | . | . | . | . |
| .         | .            | . | . | . | . | . | . |
| Vv13g1193 | Tc10_g006210 | . | . | . | . | . | . |
| .         | .            | . | . | . | . | . | . |
| Vv13g1194 | .            | . | . | . | . | . | . |
| .         | .            | . | . | . | . | . | . |
| Vv13g1195 | .            | . | . | . | . | . | . |
| .         | .            | . | . | . | . | . | . |
| Vv13g1196 | .            | . | . | . | . | . | . |
| .         | .            | . | . | . | . | . | . |
| Vv13g1197 | .            | . | . | . | . | . | . |
| Vv08g1799 | Tc05_g016710 | . | . | . | . | . | . |
| .         | .            | . | . | . | . | . | . |
| Vv13g1198 | .            | . | . | . | . | . | . |
| .         | .            | . | . | . | . | . | . |
| Vv13g1199 | .            | . | . | . | . | . | . |
| .         | .            | . | . | . | . | . | . |
| Vv13g1200 | .            | . | . | . | . | . | . |
| .         | .            | . | . | . | . | . | . |
| Vv13g1201 | Tc10_g006160 | . | . | . | . | . | . |

|           |              |   |   |   |   |   |
|-----------|--------------|---|---|---|---|---|
| Vv13g1202 | Tc10_g006150 | . | . | . | . | . |
| Vv13g1203 | Tc10_g013490 | . | . | . | . | . |
| Vv13g1204 | Tc10_g013480 | . | . | . | . | . |
| Vv13g1205 | .            | . | . | . | . | . |
| Vv13g1206 | Tc10_g013470 | . | . | . | . | . |
| Vv13g1207 | .            | . | . | . | . | . |
| Vv08g1798 | .            | . | . | . | . | . |
| Vv13g1208 | .            | . | . | . | . | . |
| Vv08g1793 | Tc05_g016440 | . | . | . | . | . |
| Vv13g1209 | .            | . | . | . | . | . |
| Vv13g1210 | .            | . | . | . | . | . |
| Vv13g1211 | .            | . | . | . | . | . |
| Vv08g1792 | Tc05_g016430 | . | . | . | . | . |
| Vv13g1212 | .            | . | . | . | . | . |
| Vv13g1213 | .            | . | . | . | . | . |
| Vv13g1214 | .            | . | . | . | . | . |
| Vv13g1215 | .            | . | . | . | . | . |
| Vv13g1216 | .            | . | . | . | . | . |
| Vv13g1217 | Tc10_g006120 | . | . | . | . | . |

|              |   |   |   |   |   |        |   |
|--------------|---|---|---|---|---|--------|---|
| Vv13g1218    | . | . | . | . | . | .      | . |
| .            | . | . | . | . | . | .      | . |
| Vv13g1219    | . | . | . | . | . | .      | . |
| .            | . | . | . | . | . | .      | . |
| Vv13g1220    | . | . | . | . | . | .      | . |
| .            | . | . | . | . | . | .      | . |
| Vv13g1221    | . | . | . | . | . | .      | . |
| .            | . | . | . | . | . | .      | . |
| Vv13g1222    | . | . | . | . | . | .      | . |
| .            | . | . | . | . | . | .      | . |
| Vv13g1223    | . | . | . | . | . | .      | . |
| .            | . | . | . | . | . | .      | . |
| Vv13g1224    | . | . | . | . | . | .      | . |
| .            | . | . | . | . | . | .      | . |
| Vv13g1225    | . | . | . | . | . | .      | . |
| .            | . | . | . | . | . | .      | . |
| Vv13g1226    | . | . | . | . | . | .      | . |
| .            | . | . | . | . | . | .      | . |
| Vv13g1227    | . | . | . | . | . | .      | . |
| Vv08g1776    | . | . | . | . | . | Gorai. | . |
| 007G360200.1 | . | . | . | . | . | .      | . |
| Vv13g1228    | . | . | . | . | . | .      | . |
| .            | . | . | . | . | . | .      | . |
| Vv13g1229    | . | . | . | . | . | .      | . |
| .            | . | . | . | . | . | .      | . |
| Vv13g1230    | . | . | . | . | . | .      | . |
| .            | . | . | . | . | . | .      | . |
| Vv13g1231    | . | . | . | . | . | .      | . |
| .            | . | . | . | . | . | .      | . |
| Vv13g1232    | . | . | . | . | . | .      | . |
| .            | . | . | . | . | . | .      | . |
| Vv13g1233    | . | . | . | . | . | .      | . |
| .            | . | . | . | . | . | .      | . |
| Vv13g1234    | . | . | . | . | . | .      | . |
| .            | . | . | . | . | . | .      | . |

|           |              |   |   |                    |   |   |   |
|-----------|--------------|---|---|--------------------|---|---|---|
| Vv13g1235 | .            | . | . | .                  | . | . | . |
| .         | .            | . | . | .                  | . | . | . |
| Vv13g1236 | .            | . | . | .                  | . | . | . |
| .         | .            | . | . | .                  | . | . | . |
| Vv13g1237 | .            | . | . | .                  | . | . | . |
| Vv08g1775 | .            | . | . | .                  | . | . | . |
| .         | .            | . | . | .                  | . | . | . |
| Vv13g1238 | Tc10_g013170 | . | . | Gorai.011G222300.1 | . | . | . |
| .         | .            | . | . | .                  | . | . | . |
| Vv13g1239 | .            | . | . | .                  | . | . | . |
| Vv08g1774 | .            | . | . | .                  | . | . | . |
| .         | .            | . | . | .                  | . | . | . |
| Vv13g1240 | .            | . | . | .                  | . | . | . |
| .         | .            | . | . | .                  | . | . | . |
| Vv13g1241 | .            | . | . | .                  | . | . | . |
| .         | .            | . | . | .                  | . | . | . |
| Vv13g1242 | .            | . | . | .                  | . | . | . |
| .         | .            | . | . | .                  | . | . | . |
| Vv13g1243 | .            | . | . | .                  | . | . | . |
| .         | .            | . | . | .                  | . | . | . |
| Vv13g1244 | Tc10_g006080 | . | . | .                  | . | . | . |
| .         | .            | . | . | .                  | . | . | . |
| Vv13g1245 | Tc10_g006070 | . | . | .                  | . | . | . |
| .         | .            | . | . | .                  | . | . | . |
| Vv13g1246 | .            | . | . | .                  | . | . | . |
| .         | .            | . | . | .                  | . | . | . |
| Vv13g1247 | .            | . | . | .                  | . | . | . |
| .         | .            | . | . | .                  | . | . | . |
| Vv13g1248 | .            | . | . | .                  | . | . | . |
| .         | .            | . | . | .                  | . | . | . |
| Vv13g1249 | .            | . | . | .                  | . | . | . |
| .         | .            | . | . | .                  | . | . | . |
| Vv13g1250 | .            | . | . | .                  | . | . | . |
| .         | .            | . | . | .                  | . | . | . |
| Vv13g1251 | .            | . | . | .                  | . | . | . |

|                    |                    |                    |   |                    |                    |           |   |
|--------------------|--------------------|--------------------|---|--------------------|--------------------|-----------|---|
| .                  | .                  | .                  | . | .                  | .                  | .         | . |
| .                  | .                  | .                  | . | .                  | .                  | .         | . |
| Vv13g1252          | .                  | .                  | . | .                  | .                  | .         | . |
| .                  | .                  | .                  | . | .                  | .                  | .         | . |
| Vv13g1253          | .                  | .                  | . | .                  | .                  | .         | . |
| .                  | .                  | .                  | . | .                  | .                  | .         | . |
| Vv13g1254          | .                  | .                  | . | .                  | .                  | .         | . |
| .                  | .                  | .                  | . | .                  | .                  | .         | . |
| Vv13g1255          | .                  | .                  | . | .                  | .                  | .         | . |
| .                  | .                  | .                  | . | .                  | .                  | .         | . |
| Vv13g1256          | .                  | .                  | . | .                  | .                  | .         | . |
| Vv08g1766          | .                  | .                  | . | .                  | .                  | .         | . |
| .                  | .                  | .                  | . | .                  | .                  | .         | . |
| Vv13g1257          | .                  | .                  | . | .                  | .                  | .         | . |
| .                  | .                  | .                  | . | .                  | .                  | Vv06g0272 | . |
| .                  | Gorai.013G251200.1 | .                  | . | .                  | .                  | .         | . |
| Vv13g1258          | .                  | .                  | . | .                  | .                  | .         | . |
| .                  | .                  | .                  | . | .                  | .                  | .         | . |
| Vv13g1259          | .                  | .                  | . | .                  | .                  | .         | . |
| .                  | .                  | .                  | . | .                  | .                  | .         | . |
| Vv13g1260          | .                  | .                  | . | .                  | .                  | .         | . |
| .                  | .                  | .                  | . | .                  | .                  | .         | . |
| Vv13g1261          | .                  | .                  | . | .                  | .                  | .         | . |
| .                  | .                  | .                  | . | .                  | .                  | Vv06g0269 | . |
| .                  | .                  | .                  | . | .                  | Gorai.009G073300.1 | .         | . |
| Gorai.006G128600.1 | .                  | .                  | . | .                  | .                  | .         | . |
| Vv13g1262          | .                  | .                  | . | .                  | .                  | .         | . |
| Vv08g1764          | .                  | .                  | . | .                  | .                  | .         | . |
| Vv06g0266          | .                  | .                  | . | Gorai.001G138300.1 | .                  | Gorai.    | . |
| 004G037500.1       | .                  | Gorai.006G138100.1 | . | .                  | .                  | .         | . |
| Vv13g1263          | .                  | .                  | . | .                  | .                  | .         | . |
| .                  | .                  | .                  | . | .                  | .                  | .         | . |
| .                  | .                  | .                  | . | .                  | .                  | .         | . |
| Vv13g1264          | .                  | .                  | . | .                  | .                  | .         | . |
| Vv08g1763          | .                  | .                  | . | Gorai.002G230300.1 | .                  | .         | . |
| .                  | .                  | .                  | . | .                  | .                  | .         | . |
| Vv13g1265          | .                  | .                  | . | .                  | .                  | .         | . |
| .                  | .                  | .                  | . | .                  | .                  | Vv06g0264 | . |
| .                  | .                  | .                  | . | Gorai.004G037400.1 | .                  | .         | . |
| Gorai.006G128800.1 | .                  | .                  | . | .                  | .                  | .         | . |
| Vv13g1266          | .                  | .                  | . | .                  | .                  | .         | . |
| .                  | .                  | .                  | . | .                  | .                  | .         | . |
| .                  | .                  | .                  | . | .                  | .                  | .         | . |

|              |   |                    |   |   |   |        |   |
|--------------|---|--------------------|---|---|---|--------|---|
| Vv13g1267    | . | .                  | . | . | . | .      | . |
| .            | . | .                  | . | . | . | .      | . |
| Vv13g1268    | . | .                  | . | . | . | .      | . |
| .            | . | .                  | . | . | . | .      | . |
| Vv13g1269    | . | .                  | . | . | . | .      | . |
| .            | . | .                  | . | . | . | .      | . |
| Vv13g1270    | . | .                  | . | . | . | .      | . |
| .            | . | .                  | . | . | . | .      | . |
| Vv13g1271    | . | .                  | . | . | . | .      | . |
| .            | . | .                  | . | . | . | .      | . |
| Vv13g1272    | . | .                  | . | . | . | .      | . |
| .            | . | .                  | . | . | . | .      | . |
| Vv13g1273    | . | .                  | . | . | . | .      | . |
| .            | . | .                  | . | . | . | .      | . |
| Vv13g1274    | . | .                  | . | . | . | .      | . |
| .            | . | .                  | . | . | . | .      | . |
| Vv13g1275    | . | .                  | . | . | . | .      | . |
| .            | . | .                  | . | . | . | .      | . |
| Vv13g1276    | . | .                  | . | . | . | .      | . |
| .            | . | .                  | . | . | . | .      | . |
| Vv13g1277    | . | .                  | . | . | . | .      | . |
| .            | . | .                  | . | . | . | .      | . |
| Vv13g1278    | . | .                  | . | . | . | .      | . |
| .            | . | .                  | . | . | . | .      | . |
| Vv13g1279    | . | .                  | . | . | . | .      | . |
| .            | . | .                  | . | . | . | .      | . |
| Vv13g1280    | . | .                  | . | . | . | .      | . |
| Vv08g1748    | . | .                  | . | . | . | .      | . |
| Vv06g0236    | . | Gorai.013G250800.1 | . | . | . | Gorai. | . |
| 004G037000.1 | . | Gorai.006G138700.1 | . | . | . | .      | . |
| Vv13g1281    | . | .                  | . | . | . | .      | . |
| .            | . | .                  | . | . | . | .      | . |
| Vv13g1282    | . | .                  | . | . | . | .      | . |
| .            | . | .                  | . | . | . | .      | . |
| Vv13g1283    | . | .                  | . | . | . | .      | . |

|           |                    |  |  |                    |  |  |  |
|-----------|--------------------|--|--|--------------------|--|--|--|
| Vv13g1284 |                    |  |  |                    |  |  |  |
| Vv13g1285 |                    |  |  |                    |  |  |  |
| Vv13g1286 |                    |  |  |                    |  |  |  |
| Vv13g1287 |                    |  |  |                    |  |  |  |
| Vv13g1288 |                    |  |  |                    |  |  |  |
| Vv13g1289 |                    |  |  |                    |  |  |  |
| Vv13g1290 |                    |  |  |                    |  |  |  |
| Vv08g1741 | Tc05_g008610       |  |  | Gorai.002G229200.1 |  |  |  |
|           | Gorai.007G358100.1 |  |  | Vv06g0229          |  |  |  |
|           | Gorai.004G036200.1 |  |  |                    |  |  |  |
| Vv13g1291 |                    |  |  |                    |  |  |  |
| Vv13g1292 |                    |  |  |                    |  |  |  |
| Vv13g1293 |                    |  |  |                    |  |  |  |
| Vv13g1294 |                    |  |  |                    |  |  |  |
| Vv13g1295 |                    |  |  |                    |  |  |  |
| Vv13g1296 |                    |  |  |                    |  |  |  |
| Vv13g1297 |                    |  |  |                    |  |  |  |
| Vv13g1298 |                    |  |  |                    |  |  |  |
| Vv13g1299 |                    |  |  |                    |  |  |  |



|           |              |   |   |   |   |   |
|-----------|--------------|---|---|---|---|---|
| Vv13g1300 | Tc10_g006250 | . | . | . | . | . |
| .         | .            | . | . | . | . | . |
| Vv13g1301 | .            | . | . | . | . | . |
| .         | .            | . | . | . | . | . |
| Vv13g1302 | .            | . | . | . | . | . |
| .         | .            | . | . | . | . | . |
| Vv13g1303 | .            | . | . | . | . | . |
| .         | .            | . | . | . | . | . |
| Vv13g1304 | .            | . | . | . | . | . |
| .         | .            | . | . | . | . | . |
| Vv13g1305 | .            | . | . | . | . | . |
| .         | .            | . | . | . | . | . |
| Vv13g1306 | .            | . | . | . | . | . |
| Vv06g0219 | .            | . | . | . | . | . |
| .         | .            | . | . | . | . | . |
| Vv13g1307 | .            | . | . | . | . | . |
| .         | .            | . | . | . | . | . |
| Vv13g1308 | .            | . | . | . | . | . |
| .         | .            | . | . | . | . | . |
| Vv13g1309 | .            | . | . | . | . | . |
| .         | .            | . | . | . | . | . |
| Vv13g1310 | .            | . | . | . | . | . |
| .         | .            | . | . | . | . | . |
| Vv13g1311 | .            | . | . | . | . | . |
| .         | .            | . | . | . | . | . |
| Vv13g1312 | .            | . | . | . | . | . |
| .         | .            | . | . | . | . | . |
| Vv13g1313 | .            | . | . | . | . | . |
| .         | .            | . | . | . | . | . |
| Vv13g1314 | .            | . | . | . | . | . |
| .         | .            | . | . | . | . | . |
| Vv13g1315 | .            | . | . | . | . | . |
| .         | .            | . | . | . | . | . |
| Vv13g1316 | .            | . | . | . | . | . |

|           |              |   |   |   |                    |   |   |
|-----------|--------------|---|---|---|--------------------|---|---|
| .         | .            | . | . | . | .                  | . | . |
| .         | .            | . | . | . | .                  | . | . |
| Vv13g1317 | .            | . | . | . | .                  | . | . |
| .         | .            | . | . | . | .                  | . | . |
| Vv13g1318 | .            | . | . | . | .                  | . | . |
| .         | .            | . | . | . | .                  | . | . |
| Vv13g1319 | .            | . | . | . | .                  | . | . |
| .         | .            | . | . | . | .                  | . | . |
| Vv13g1320 | .            | . | . | . | .                  | . | . |
| .         | .            | . | . | . | .                  | . | . |
| Vv13g1321 | .            | . | . | . | .                  | . | . |
| .         | .            | . | . | . | .                  | . | . |
| Vv13g1322 | .            | . | . | . | .                  | . | . |
| .         | .            | . | . | . | .                  | . | . |
| Vv13g1323 | Tc10_g006390 | . | . | . | .                  | . | . |
| Vv06g0194 | .            | . | . | . | .                  | . | . |
| .         | .            | . | . | . | .                  | . | . |
| Vv13g1324 | .            | . | . | . | .                  | . | . |
| Vv06g0192 | .            | . | . | . | .                  | . | . |
| .         | .            | . | . | . | .                  | . | . |
| Vv13g1325 | .            | . | . | . | .                  | . | . |
| Vv06g0191 | .            | . | . | . | Gorai.009G071200.1 | . | . |
| .         | .            | . | . | . | .                  | . | . |
| Vv13g1326 | .            | . | . | . | .                  | . | . |
| .         | .            | . | . | . | .                  | . | . |
| Vv13g1327 | .            | . | . | . | .                  | . | . |
| .         | .            | . | . | . | .                  | . | . |
| Vv13g1328 | .            | . | . | . | .                  | . | . |
| Vv06g0187 | .            | . | . | . | .                  | . | . |
| .         | .            | . | . | . | .                  | . | . |
| Vv13g1329 | .            | . | . | . | .                  | . | . |
| .         | .            | . | . | . | .                  | . | . |
| Vv14g0001 | .            | . | . | . | .                  | . | . |
| .         | .            | . | . | . | .                  | . | . |
| Vv14g0002 | .            | . | . | . | .                  | . | . |
| .         | .            | . | . | . | .                  | . | . |
| Vv14g0003 | .            | . | . | . | .                  | . | . |
| .         | .            | . | . | . | .                  | . | . |
| .         | .            | . | . | . | .                  | . | . |

|           |                    |   |                    |   |
|-----------|--------------------|---|--------------------|---|
| Vv14g0004 | Tc05_g004980       | . | Gorai.002G261200.1 | . |
|           | Gorai.012G101800.1 | . | .                  | . |
| .         | .                  | . | .                  | . |
| Vv14g0005 | Tc04_g005500       | . | .                  | . |
| .         | .                  | . | .                  | . |
| .         | .                  | . | .                  | . |
| Vv14g0006 | .                  | . | .                  | . |
| .         | .                  | . | .                  | . |
| .         | .                  | . | .                  | . |
| Vv14g0007 | .                  | . | .                  | . |
| .         | .                  | . | .                  | . |
| .         | .                  | . | .                  | . |
| Vv14g0008 | .                  | . | .                  | . |
| Vv05g0331 | Gorai.006G263500.1 | . | .                  | . |
|           | Gorai.002G028200.1 | . | .                  | . |
| .         | .                  | . | .                  | . |
| Vv14g0009 | .                  | . | .                  | . |
| .         | .                  | . | .                  | . |
| .         | .                  | . | .                  | . |
| Vv14g0010 | .                  | . | .                  | . |
| .         | .                  | . | .                  | . |
| .         | .                  | . | .                  | . |
| Vv14g0011 | .                  | . | .                  | . |
| .         | .                  | . | .                  | . |
| .         | .                  | . | .                  | . |
| Vv14g0012 | .                  | . | .                  | . |
| .         | .                  | . | .                  | . |
| .         | .                  | . | .                  | . |
| Vv14g0013 | .                  | . | .                  | . |
| .         | .                  | . | .                  | . |
| .         | .                  | . | .                  | . |
| Vv14g0014 | .                  | . | .                  | . |
| .         | .                  | . | .                  | . |
| .         | .                  | . | .                  | . |
| Vv14g0015 | .                  | . | .                  | . |
| .         | .                  | . | .                  | . |
| .         | .                  | . | .                  | . |
| Vv14g0016 | .                  | . | .                  | . |
| .         | .                  | . | .                  | . |
| .         | .                  | . | .                  | . |
| Vv14g0017 | .                  | . | .                  | . |
| .         | .                  | . | .                  | . |
| .         | .                  | . | .                  | . |
| Vv14g0018 | Tc04_g005140       | . | Gorai.001G275900.1 | . |
| .         | Gorai.012G082800.1 | . | .                  | . |
| .         | .                  | . | .                  | . |
| .         | .                  | . | .                  | . |
| Vv14g0019 | .                  | . | .                  | . |
| .         | .                  | . | .                  | . |

|                    |              |   |                    |   |   |   |
|--------------------|--------------|---|--------------------|---|---|---|
| Vv14g0020          | .            | . | Gorai.013G131700.1 | . | . | . |
| .                  | .            | . | .                  | . | . | . |
| Vv14g0021          | .            | . | .                  | . | . | . |
| .                  | .            | . | .                  | . | . | . |
| Vv14g0022          | .            | . | .                  | . | . | . |
| .                  | .            | . | .                  | . | . | . |
| Vv14g0023          | .            | . | .                  | . | . | . |
| .                  | .            | . | .                  | . | . | . |
| Vv14g0024          | .            | . | .                  | . | . | . |
| .                  | .            | . | .                  | . | . | . |
| Vv14g0025          | .            | . | .                  | . | . | . |
| .                  | .            | . | .                  | . | . | . |
| Vv14g0026          | .            | . | .                  | . | . | . |
| .                  | .            | . | .                  | . | . | . |
| Vv14g0027          | Tc05_g004610 | . | Gorai.013G131600.1 | . | . | . |
| Gorai.013G211000.1 | .            | . | Vv05g0304          | . | . | . |
| .                  | .            | . | Vv07g0619          | . | . | . |
| Gorai.007G118400.1 | .            | . | .                  | . | . | . |
| Vv14g0028          | .            | . | .                  | . | . | . |
| .                  | .            | . | .                  | . | . | . |
| Vv14g0029          | .            | . | .                  | . | . | . |
| .                  | .            | . | .                  | . | . | . |
| Vv14g0030          | Tc04_g005090 | . | Gorai.007G309400.1 | . | . | . |
| Gorai.007G118100.1 | .            | . | .                  | . | . | . |
| .                  | .            | . | .                  | . | . | . |
| Vv14g0031          | .            | . | .                  | . | . | . |
| .                  | .            | . | .                  | . | . | . |
| Vv14g0032          | .            | . | .                  | . | . | . |
| .                  | .            | . | .                  | . | . | . |
| Vv14g0033          | .            | . | .                  | . | . | . |
| .                  | .            | . | .                  | . | . | . |
| Vv14g0034          | .            | . | Gorai.013G210200.1 | . | . | . |
| .                  | Vv05g0297    | . | .                  | . | . | . |
| .                  | .            | . | .                  | . | . | . |
| Vv14g0035          | .            | . | .                  | . | . | . |
| .                  | .            | . | .                  | . | . | . |

|                    |                    |                    |                    |                    |   |
|--------------------|--------------------|--------------------|--------------------|--------------------|---|
| Vv14g0036          | .                  | .                  | .                  | Gorai.013G210000.1 | . |
| .                  | .                  | .                  | .                  | .                  | . |
| Vv14g0037          | Tc04_g030740       | .                  | .                  | .                  | . |
| .                  | .                  | .                  | .                  | .                  | . |
| Vv14g0038          | .                  | .                  | .                  | .                  | . |
| .                  | .                  | .                  | .                  | .                  | . |
| Vv14g0039          | Tc04_g030730       | .                  | .                  | .                  | . |
| .                  | .                  | .                  | .                  | .                  | . |
| Vv14g0040          | .                  | .                  | .                  | .                  | . |
| Vv05g0292          | Tc04_g030740       | .                  | Gorai.005G073900.1 | .                  | . |
| .                  | .                  | .                  | .                  | .                  | . |
| Vv14g0041          | .                  | .                  | .                  | .                  | . |
| .                  | .                  | .                  | .                  | .                  | . |
| Vv14g0042          | .                  | .                  | .                  | .                  | . |
| .                  | .                  | .                  | .                  | .                  | . |
| Vv14g0043          | Tc04_g030610       | .                  | .                  | Gorai.013G209800.1 | . |
| .                  | .                  | .                  | .                  | .                  | . |
| Vv14g0044          | Tc04_g030600       | .                  | .                  | .                  | . |
| Vv05g0278          | Tc04_g030600       | .                  | .                  | .                  | . |
| .                  | .                  | .                  | .                  | .                  | . |
| Vv14g0045          | .                  | .                  | .                  | .                  | . |
| .                  | .                  | .                  | .                  | .                  | . |
| Vv14g0046          | .                  | .                  | .                  | .                  | . |
| Tc01_g032740       | .                  | Gorai.008G135500.1 | .                  | Vv07g0598          | . |
| .                  | .                  | .                  | .                  | .                  | . |
| Vv14g0047          | Tc04_g030560       | .                  | .                  | .                  | . |
| Gorai.002G032100.1 | Vv05g0275          | Tc04_g030560       | .                  | .                  | . |
| .                  | Gorai.011G205200.1 | .                  | .                  | .                  | . |
| .                  | .                  | .                  | .                  | .                  | . |
| Vv14g0048          | .                  | .                  | .                  | .                  | . |
| .                  | .                  | .                  | .                  | .                  | . |
| Vv14g0049          | .                  | Gorai.013G131200.1 | .                  | .                  | . |
| .                  | .                  | .                  | .                  | .                  | . |
| Vv07g0597          | .                  | .                  | .                  | .                  | . |
| Vv14g0050          | .                  | Gorai.007G309000.1 | .                  | .                  | . |
| .                  | .                  | .                  | .                  | .                  | . |
| .                  | .                  | .                  | .                  | .                  | . |
| Vv14g0051          | .                  | Gorai.013G131100.1 | .                  | .                  | . |

|                    |                    |   |                    |                    |                    |                    |   |
|--------------------|--------------------|---|--------------------|--------------------|--------------------|--------------------|---|
| .                  | .                  | . | .                  | .                  | .                  | .                  | . |
| .                  | .                  | . | .                  | .                  | .                  | .                  | . |
| Vv14g0052          | Tc05_g004510       | . | .                  | .                  | .                  | Gorai.             | . |
| 012G104300.1       | .                  | . | .                  | .                  | .                  | .                  | . |
| .                  | .                  | . | .                  | .                  | .                  | .                  | . |
| Vv14g0053          | Tc04_g030480       | . | .                  | .                  | .                  | Gorai.             | . |
| 011G205000.1       | .                  | . | .                  | .                  | .                  | .                  | . |
| .                  | .                  | . | .                  | .                  | .                  | .                  | . |
| Vv14g0054          | Tc04_g030470       | . | .                  | .                  | .                  | Gorai.             | . |
| 011G204900.1       | .                  | . | .                  | .                  | .                  | .                  | . |
| .                  | .                  | . | .                  | .                  | .                  | .                  | . |
| Vv14g0055          | Tc04_g030460       | . | .                  | .                  | .                  | Gorai.007G119200.1 | . |
| .                  | Vv05g0266          | . | .                  | .                  | Tc04_g030460       | .                  | . |
| Gorai.005G071300.1 | .                  | . | .                  | .                  | Vv07g0590          | .                  | . |
| Tc01_g032660       | Gorai.007G119200.1 | . | .                  | .                  | Gorai.008G135900.1 | .                  | . |
| .                  | Gorai.004G146800.1 | . | .                  | .                  | .                  | .                  | . |
| Vv14g0056          | .                  | . | .                  | .                  | .                  | .                  | . |
| .                  | .                  | . | .                  | .                  | .                  | .                  | . |
| .                  | .                  | . | .                  | .                  | .                  | .                  | . |
| Vv14g0057          | Tc04_g016760       | . | .                  | .                  | .                  | Gorai.             | . |
| 011G129900.1       | .                  | . | .                  | .                  | .                  | .                  | . |
| .                  | .                  | . | .                  | .                  | .                  | .                  | . |
| Vv14g0058          | .                  | . | .                  | .                  | .                  | .                  | . |
| .                  | .                  | . | .                  | .                  | .                  | .                  | . |
| .                  | .                  | . | .                  | .                  | .                  | .                  | . |
| Vv14g0059          | Tc04_g016740       | . | .                  | .                  | .                  | Gorai.             | . |
| 011G129800.1       | .                  | . | .                  | .                  | .                  | .                  | . |
| .                  | .                  | . | .                  | .                  | .                  | .                  | . |
| Vv14g0060          | .                  | . | .                  | .                  | .                  | .                  | . |
| .                  | .                  | . | .                  | .                  | .                  | .                  | . |
| .                  | .                  | . | .                  | .                  | .                  | .                  | . |
| Vv14g0061          | Tc04_g016340       | . | .                  | .                  | .                  | .                  | . |
| .                  | .                  | . | .                  | .                  | .                  | .                  | . |
| .                  | .                  | . | .                  | .                  | .                  | .                  | . |
| Vv14g0062          | .                  | . | Gorai.007G308700.1 | .                  | .                  | .                  | . |
| .                  | .                  | . | .                  | .                  | .                  | .                  | . |
| .                  | .                  | . | .                  | .                  | .                  | .                  | . |
| Vv14g0063          | .                  | . | .                  | .                  | .                  | .                  | . |
| .                  | .                  | . | .                  | .                  | .                  | .                  | . |
| .                  | .                  | . | .                  | .                  | .                  | .                  | . |
| Vv14g0064          | .                  | . | .                  | Gorai.013G209300.1 | .                  | .                  | . |
| .                  | .                  | . | .                  | .                  | .                  | .                  | . |
| .                  | .                  | . | .                  | .                  | .                  | .                  | . |
| Vv14g0065          | .                  | . | Gorai.007G308600.1 | .                  | Gorai.             | .                  | . |
| 013G209200.1       | .                  | . | .                  | .                  | .                  | .                  | . |
| .                  | .                  | . | .                  | .                  | .                  | .                  | . |
| .                  | .                  | . | .                  | .                  | .                  | .                  | . |
| Vv14g0066          | .                  | . | .                  | .                  | .                  | .                  | . |
| .                  | .                  | . | .                  | .                  | .                  | .                  | . |
| .                  | .                  | . | .                  | .                  | .                  | .                  | . |

|                    |                    |                    |           |   |   |   |   |
|--------------------|--------------------|--------------------|-----------|---|---|---|---|
| Vv14g0067          | .                  | .                  | .         | . | . | . | . |
| .                  | .                  | .                  | .         | . | . | . | . |
| Vv14g0068          | Tc04_g016080       | .                  | .         | . | . | . | . |
| .                  | .                  | .                  | .         | . | . | . | . |
| Vv14g0069          | .                  | .                  | .         | . | . | . | . |
| .                  | .                  | .                  | .         | . | . | . | . |
| Vv14g0070          | .                  | .                  | .         | . | . | . | . |
| .                  | .                  | .                  | .         | . | . | . | . |
| Vv14g0071          | .                  | .                  | .         | . | . | . | . |
| .                  | .                  | .                  | .         | . | . | . | . |
| Vv14g0072          | Tc04_g030230       | .                  | .         | . | . | . | . |
| Vv05g0237          | Tc04_g030230       | Gorai.006G266100.1 | .         | . | . | . | . |
| Gorai.005G069900.1 | .                  | .                  | Vv07g0575 | . | . | . | . |
| Tc01_g032480       | Gorai.008G136700.1 | .                  | .         | . | . | . | . |
| Vv14g0073          | .                  | Gorai.013G209000.1 | .         | . | . | . | . |
| .                  | .                  | .                  | .         | . | . | . | . |
| Vv14g0074          | .                  | Gorai.007G308400.1 | .         | . | . | . | . |
| .                  | .                  | .                  | .         | . | . | . | . |
| Vv14g0075          | Tc05_g009390       | .                  | .         | . | . | . | . |
| .                  | .                  | .                  | .         | . | . | . | . |
| Vv14g0076          | .                  | .                  | .         | . | . | . | . |
| .                  | .                  | .                  | .         | . | . | . | . |
| Vv14g0077          | .                  | .                  | .         | . | . | . | . |
| .                  | .                  | .                  | .         | . | . | . | . |
| Vv14g0078          | .                  | .                  | .         | . | . | . | . |
| .                  | .                  | .                  | .         | . | . | . | . |
| Vv14g0079          | Gorai.013G131000.1 | .                  | Gorai.    | . | . | . | . |
| 007G120600.1       | .                  | .                  | .         | . | . | . | . |
| .                  | .                  | .                  | .         | . | . | . | . |
| Vv14g0080          | Tc05_g004500       | .                  | .         | . | . | . | . |
| .                  | .                  | .                  | .         | . | . | . | . |
| Vv14g0081          | .                  | .                  | .         | . | . | . | . |
| .                  | .                  | .                  | .         | . | . | . | . |
| Vv14g0082          | Tc04_g030130       | Gorai.013G130900.1 | .         | . | . | . | . |
| Gorai.007G120900.1 | .                  | Vv05g0228          | .         | . | . | . | . |
| .                  | .                  | Vv07g0565          | .         | . | . | . | . |

|                    |              |                    |   |   |   |   |
|--------------------|--------------|--------------------|---|---|---|---|
| Tc01_g032360       | .            | .                  | . | . | . | . |
| Vv14g0083          | Tc04_g030120 | .                  | . | . | . | . |
| .                  | .            | .                  | . | . | . | . |
| Vv14g0084          | .            | .                  | . | . | . | . |
| .                  | .            | .                  | . | . | . | . |
| Vv14g0085          | .            | Gorai.013G130800.1 | . | . | . | . |
| Vv07g0563          | .            | Gorai.007G120900.1 | . | . | . | . |
| .                  | .            | .                  | . | . | . | . |
| Vv14g0086          | .            | .                  | . | . | . | . |
| .                  | .            | .                  | . | . | . | . |
| Vv14g0087          | .            | .                  | . | . | . | . |
| .                  | .            | .                  | . | . | . | . |
| Vv14g0088          | .            | .                  | . | . | . | . |
| .                  | .            | .                  | . | . | . | . |
| Vv14g0089          | .            | .                  | . | . | . | . |
| .                  | .            | .                  | . | . | . | . |
| Vv14g0090          | .            | .                  | . | . | . | . |
| .                  | .            | .                  | . | . | . | . |
| Vv14g0091          | .            | .                  | . | . | . | . |
| .                  | .            | .                  | . | . | . | . |
| Vv14g0092          | .            | .                  | . | . | . | . |
| .                  | .            | .                  | . | . | . | . |
| Vv14g0093          | .            | .                  | . | . | . | . |
| .                  | .            | .                  | . | . | . | . |
| Vv14g0094          | .            | .                  | . | . | . | . |
| Vv05g0193          | Tc04_g030120 | Gorai.006G265600.1 | . | . | . | . |
| .                  | .            | .                  | . | . | . | . |
| Vv14g0095          | .            | Gorai.007G308300.1 | . | . | . | . |
| .                  | .            | .                  | . | . | . | . |
| Vv14g0096          | .            | Gorai.007G308200.1 | . | . | . | . |
| .                  | .            | .                  | . | . | . | . |
| Vv07g0562          | Tc01_g032350 | .                  | . | . | . | . |
| Gorai.004G145900.1 | .            | .                  | . | . | . | . |
| Vv14g0097          | .            | Gorai.013G208400.1 | . | . | . | . |
| .                  | .            | .                  | . | . | . | . |
| Vv14g0098          | .            | Gorai.013G208300.1 | . | . | . | . |



|                    |                    |                    |                    |                    |   |   |
|--------------------|--------------------|--------------------|--------------------|--------------------|---|---|
| .                  | .                  | .                  | .                  | .                  | . | . |
| Vv14g0099          | Tc04_g030070       | Gorai.013G130600.1 | .                  | Gorai.             | . | . |
| 007G308100.1       | Gorai.013G208200.1 | .                  | .                  | Vv05g0188          | . | . |
|                    | Tc04_g030070       | .                  | .                  | Gorai.011G203600.1 | . | . |
| Vv14g0100          | Tc04_g023940       | .                  | .                  | .                  | . | . |
| .                  | .                  | .                  | .                  | .                  | . | . |
| Vv14g0101          | Tc04_g024140       | .                  | .                  | Gorai.             | . | . |
| 011G165700.1       | .                  | .                  | .                  | .                  | . | . |
| Vv14g0102          | Tc04_g030020       | .                  | .                  | Gorai.013G208100.1 | . | . |
| .                  | Gorai.002G031600.1 | .                  | .                  | .                  | . | . |
| .                  | .                  | Vv07g0546          | .                  | Tc01_g032270       | . | . |
| .                  | .                  | Gorai.004G145200.1 | .                  | .                  | . | . |
| Vv14g0103          | Tc04_g030010       | Gorai.013G130500.1 | .                  | .                  | . | . |
| Gorai.013G208000.1 | Gorai.011G203200.1 | .                  | .                  | .                  | . | . |
| .                  | .                  | .                  | .                  | .                  | . | . |
| Vv14g0104          | .                  | Gorai.013G130400.1 | .                  | .                  | . | . |
| .                  | .                  | .                  | .                  | .                  | . | . |
| Vv14g0105          | .                  | Gorai.013G130300.1 | .                  | .                  | . | . |
| .                  | .                  | .                  | .                  | .                  | . | . |
| Vv14g0106          | Tc04_g029940       | .                  | .                  | .                  | . | . |
| .                  | .                  | .                  | .                  | .                  | . | . |
| Vv14g0107          | .                  | .                  | .                  | .                  | . | . |
| .                  | .                  | .                  | .                  | .                  | . | . |
| Vv14g0108          | Tc05_g009270       | .                  | .                  | .                  | . | . |
| .                  | .                  | .                  | .                  | .                  | . | . |
| Vv14g0109          | .                  | .                  | .                  | .                  | . | . |
| .                  | .                  | .                  | .                  | .                  | . | . |
| Vv14g0110          | .                  | .                  | .                  | .                  | . | . |
| .                  | .                  | .                  | .                  | .                  | . | . |
| Vv14g0111          | Tc04_g029860       | .                  | .                  | Gorai.             | . | . |
| 011G202000.1       | .                  | Vv05g0171          | Tc04_g029860       | Gorai.             | . | . |
| 006G265400.1       | .                  | Gorai.006G080200.1 | Gorai.011G202000.1 | .                  | . | . |
|                    | Gorai.002G031000.1 | Vv07g0540          | Tc01_g032010       | .                  | . | . |
| .                  | .                  | .                  | .                  | .                  | . | . |
| Vv14g0112          | Tc04_g029780       | .                  | .                  | .                  | . | . |
|                    | Vv05g0163          | Tc04_g029780       | Gorai.006G265000.1 | .                  | . | . |
| Gorai.005G067900.1 | .                  | Gorai.011G201700.1 | Gorai.             | .                  | . | . |
| 002G030700.1       | .                  | .                  | .                  | .                  | . | . |

|                    |                    |                    |                    |   |   |
|--------------------|--------------------|--------------------|--------------------|---|---|
| Vv14g0113          | .                  | Gorai.013G130100.1 | .                  | . | . |
| .                  | .                  | .                  | .                  | . | . |
| Vv14g0114          | .                  | .                  | .                  | . | . |
| .                  | .                  | .                  | .                  | . | . |
| Vv14g0115          | Tc04_g029610       | .                  | .                  | . | . |
| Gorai.002G030400.1 | Vv05g0148          | Tc04_g029610       | .                  | . | . |
| .                  | Gorai.002G030400.1 | .                  | .                  | . | . |
| .                  | .                  | .                  | .                  | . | . |
| Vv14g0116          | .                  | Gorai.013G129700.1 | .                  | . | . |
| .                  | .                  | .                  | .                  | . | . |
| Vv14g0117          | .                  | Gorai.007G307200.1 | .                  | . | . |
| .                  | .                  | .                  | .                  | . | . |
| .                  | .                  | .                  | .                  | . | . |
| Vv14g0118          | .                  | .                  | .                  | . | . |
| .                  | .                  | .                  | .                  | . | . |
| Vv14g0119          | .                  | .                  | .                  | . | . |
| .                  | .                  | .                  | .                  | . | . |
| Vv14g0120          | Tc04_g024520       | .                  | .                  | . | . |
| .                  | .                  | .                  | .                  | . | . |
| Vv14g0121          | .                  | .                  | .                  | . | . |
| .                  | .                  | .                  | .                  | . | . |
| Vv14g0122          | Tc04_g029410       | Gorai.007G306800.1 | .                  | . | . |
| .                  | Vv05g0131          | Tc04_g029410       | .                  | . | . |
| Gorai.005G066400.1 | .                  | Vv07g0522          | .                  | . | . |
| Tc01_g031800       | .                  | .                  | .                  | . | . |
| Vv14g0123          | .                  | .                  | .                  | . | . |
| .                  | .                  | .                  | .                  | . | . |
| Vv14g0124          | .                  | .                  | .                  | . | . |
| .                  | .                  | .                  | .                  | . | . |
| Vv14g0125          | .                  | Gorai.007G306700.1 | .                  | . | . |
| .                  | .                  | .                  | .                  | . | . |
| Vv14g0126          | .                  | Gorai.013G129500.1 | Gorai.007G306600.1 | . | . |
| .                  | .                  | .                  | .                  | . | . |
| .                  | .                  | .                  | .                  | . | . |
| Vv14g0127          | .                  | .                  | .                  | . | . |
| .                  | .                  | .                  | .                  | . | . |
| Vv14g0128          | .                  | Gorai.013G129400.1 | Gorai.007G306500.1 | . | . |
| .                  | .                  | .                  | .                  | . | . |

|                    |                    |   |   |                    |   |   |   |
|--------------------|--------------------|---|---|--------------------|---|---|---|
| .                  | .                  | . | . | .                  | . | . | . |
| Vv14g0129          | Tc04_g029370       | . | . | Gorai.007G306400.1 | . | . | . |
| Gorai.013G207700.1 | .                  | . | . | .                  | . | . | . |
| .                  | .                  | . | . | .                  | . | . | . |
| Vv14g0130          | .                  | . | . | Gorai.013G207000.1 | . | . | . |
| .                  | .                  | . | . | .                  | . | . | . |
| Vv14g0131          | Tc04_g029350       | . | . | Gorai.007G122800.1 | . | . | . |
| .                  | Vv05g0126          | . | . | Tc04_g029350       | . | . | . |
| Gorai.006G079800.1 | .                  | . | . | Vv07g0509          | . | . | . |
| Tc01_g031670       | Gorai.007G122800.1 | . | . | Gorai.008G139700.1 | . | . | . |
| Gorai.004G050400.1 | .                  | . | . | .                  | . | . | . |
| Vv14g0132          | .                  | . | . | .                  | . | . | . |
| .                  | .                  | . | . | .                  | . | . | . |
| Vv14g0133          | .                  | . | . | Gorai.007G306200.1 | . | . | . |
| .                  | .                  | . | . | .                  | . | . | . |
| Vv14g0134          | .                  | . | . | .                  | . | . | . |
| .                  | .                  | . | . | .                  | . | . | . |
| Vv14g0135          | .                  | . | . | Gorai.007G306100.1 | . | . | . |
| .                  | .                  | . | . | .                  | . | . | . |
| Vv14g0136          | .                  | . | . | .                  | . | . | . |
| .                  | .                  | . | . | .                  | . | . | . |
| Vv14g0137          | .                  | . | . | Gorai.007G306000.1 | . | . | . |
| .                  | .                  | . | . | .                  | . | . | . |
| Vv14g0138          | .                  | . | . | .                  | . | . | . |
| .                  | .                  | . | . | .                  | . | . | . |
| Vv14g0139          | .                  | . | . | .                  | . | . | . |
| .                  | .                  | . | . | .                  | . | . | . |
| Vv14g0140          | .                  | . | . | .                  | . | . | . |
| .                  | .                  | . | . | .                  | . | . | . |
| Vv14g0141          | .                  | . | . | .                  | . | . | . |
| .                  | .                  | . | . | .                  | . | . | . |
| Vv14g0142          | .                  | . | . | .                  | . | . | . |
| .                  | .                  | . | . | .                  | . | . | . |
| Vv14g0143          | Gorai.013G129200.1 | . | . | Gorai.007G305800.1 | . | . | . |
| Gorai.013G206900.1 | .                  | . | . | Vv07g0501          | . | . | . |
| .                  | .                  | . | . | .                  | . | . | . |

|              |                    |                    |                    |   |   |           |   |
|--------------|--------------------|--------------------|--------------------|---|---|-----------|---|
| Vv14g0144    | .                  | .                  | .                  | . | . | .         | . |
|              | Tc01_g031580       | .                  | Gorai.008G140200.1 | . | . | Vv07g0497 | . |
|              | Gorai.004G144200.1 | .                  | .                  | . | . | .         | . |
| Vv14g0145    | .                  | .                  | .                  | . | . | .         | . |
|              | .                  | .                  | .                  | . | . | .         | . |
| Vv14g0146    | .                  | .                  | Gorai.007G305600.1 | . | . | .         | . |
|              | .                  | .                  | .                  | . | . | .         | . |
| Vv14g0147    | Tc04_g029230       | .                  | .                  | . | . | .         | . |
|              | Vv05g0119          | Tc04_g029230       | Gorai.006G259300.1 | . | . | .         | . |
|              | Gorai.006G079100.1 | .                  | .                  | . | . | .         | . |
| Vv14g0148    | Tc04_g029200       | Gorai.013G129100.1 | .                  | . | . | .         | . |
|              | .                  | Vv05g0116          | Tc04_g029210       | . | . | .         | . |
|              | Gorai.005G065800.1 | .                  | Gorai.011G198700.1 | . | . | .         | . |
| Vv14g0149    | .                  | .                  | .                  | . | . | .         | . |
|              | .                  | .                  | .                  | . | . | .         | . |
| Vv14g0150    | Tc04_g029140       | .                  | .                  | . | . | .         | . |
|              | .                  | .                  | .                  | . | . | .         | . |
| Vv14g0151    | Tc04_g024580       | .                  | .                  | . | . | .         | . |
|              | .                  | .                  | .                  | . | . | .         | . |
| Vv14g0152    | .                  | .                  | .                  | . | . | .         | . |
|              | .                  | .                  | .                  | . | . | .         | . |
| Vv14g0153    | .                  | .                  | .                  | . | . | .         | . |
|              | .                  | .                  | .                  | . | . | .         | . |
| Vv14g0154    | .                  | .                  | Gorai.007G124200.1 | . | . | .         | . |
|              | .                  | .                  | .                  | . | . | .         | . |
| Vv14g0155    | Tc04_g024840       | .                  | .                  | . | . | .         | . |
|              | .                  | .                  | .                  | . | . | .         | . |
| Vv14g0156    | .                  | .                  | .                  | . | . | .         | . |
|              | .                  | .                  | .                  | . | . | .         | . |
| Vv14g0157    | .                  | .                  | .                  | . | . | .         | . |
|              | .                  | .                  | .                  | . | . | .         | . |
| Vv14g0158    | .                  | Gorai.013G128900.1 | Gorai.007G305200.1 | . | . | .         | . |
|              | Gorai.007G124400.1 | .                  | .                  | . | . | .         | . |
|              | .                  | .                  | Vv07g0477          | . | . | .         | . |
| Tc01_g031420 | Gorai.007G124400.1 | .                  | .                  | . | . | .         | . |

|                    |                    |                    |                    |   |
|--------------------|--------------------|--------------------|--------------------|---|
| Vv14g0159          | Tc04_g029090       | Gorai.013G128700.1 | .                  | . |
| .                  | .                  | Vv05g0101          | Tc04_g029090       | . |
| .                  | .                  | .                  | .                  | . |
| Vv14g0160          | .                  | .                  | .                  | . |
| .                  | .                  | .                  | .                  | . |
| Vv14g0161          | .                  | .                  | .                  | . |
| .                  | .                  | .                  | .                  | . |
| Vv14g0162          | .                  | .                  | .                  | . |
| .                  | .                  | .                  | .                  | . |
| Vv14g0163          | .                  | Gorai.013G128600.1 | .                  | . |
| .                  | .                  | .                  | .                  | . |
| Vv14g0164          | .                  | .                  | .                  | . |
| .                  | .                  | .                  | .                  | . |
| Vv14g0165          | .                  | Gorai.013G128200.1 | .                  | . |
| .                  | .                  | .                  | .                  | . |
| Vv14g0166          | .                  | Gorai.013G128100.1 | .                  | . |
| .                  | .                  | .                  | .                  | . |
| Vv14g0167          | .                  | .                  | .                  | . |
| .                  | .                  | .                  | .                  | . |
| Vv14g0168          | Tc05_g002120       | .                  | Gorai.007G304100.1 | . |
| .                  | .                  | .                  | .                  | . |
| Vv14g0169          | .                  | .                  | .                  | . |
| .                  | .                  | .                  | .                  | . |
| Vv14g0170          | .                  | .                  | .                  | . |
| .                  | .                  | .                  | .                  | . |
| Vv14g0171          | Tc04_g029030       | Gorai.013G128000.1 | .                  | . |
| Gorai.007G124900.1 | .                  | .                  | Vv05g0097          | . |
| Tc04_g029030       | Gorai.005G065400.1 | .                  | .                  | . |
| Gorai.002G029800.1 | .                  | .                  | .                  | . |
| .                  | .                  | .                  | .                  | . |
| Vv14g0172          | Tc04_g029020       | .                  | .                  | . |
| Vv05g0096          | Tc04_g029020       | .                  | Gorai.005G065300.1 | . |
| .                  | Gorai.002G029400.1 | .                  | Vv07g0465          | . |
| Tc01_g031290       | .                  | .                  | .                  | . |
| Vv14g0173          | .                  | .                  | .                  | . |
| .                  | .                  | .                  | .                  | . |
| Vv14g0174          | .                  | Gorai.013G127800.1 | Gorai.007G303900.1 | . |

|                    |                    |                    |           |           |   |
|--------------------|--------------------|--------------------|-----------|-----------|---|
|                    | Gorai.007G125900.1 | .                  | .         | .         | . |
|                    | .                  | .                  | .         | Vv07g0457 | . |
| Tc01_g031170       | Gorai.007G125900.1 | .                  | .         | .         | . |
| Vv14g0175          | .                  | .                  | .         | .         | . |
| .                  | .                  | .                  | .         | .         | . |
| Vv14g0176          | .                  | .                  | .         | .         | . |
| .                  | .                  | .                  | .         | .         | . |
| Vv14g0177          | .                  | .                  | .         | .         | . |
| .                  | .                  | .                  | .         | .         | . |
| Vv14g0178          | .                  | .                  | .         | .         | . |
| .                  | .                  | .                  | .         | .         | . |
| Vv14g0179          | Tc04_g028970       | .                  | .         | .         | . |
| Vv05g0092          | Tc04_g028970       | Gorai.006G259800.1 | .         | .         | . |
| Gorai.005G065100.1 | .                  | .                  | Vv07g0456 | .         | . |
| Tc01_g031160       | Gorai.007G126000.1 | .                  | .         | .         | . |
| Gorai.004G237800.1 | .                  | .                  | .         | .         | . |
| Vv14g0180          | Gorai.013G127600.1 | Gorai.007G303700.1 | .         | .         | . |
| Gorai.013G206200.1 | .                  | .                  | .         | .         | . |
| .                  | .                  | .                  | .         | .         | . |
| Vv14g0181          | Tc04_g020020       | .                  | .         | Gorai.    | . |
| 011G150300.1       | .                  | .                  | .         | .         | . |
| .                  | Vv07g0452          | Tc01_g031120       | .         | .         | . |
| .                  | .                  | .                  | .         | .         | . |
| Vv14g0182          | .                  | .                  | .         | .         | . |
| .                  | .                  | .                  | .         | .         | . |
| Vv14g0183          | .                  | Gorai.007G303500.1 | .         | .         | . |
| .                  | Vv05g0054          | Tc04_g028650       | Gorai.    | .         | . |
| 005G062200.1       | Gorai.011G194000.1 | .                  | .         | .         | . |
| .                  | .                  | .                  | .         | .         | . |
| Vv14g0184          | .                  | Gorai.007G303400.1 | .         | .         | . |
| .                  | .                  | .                  | .         | .         | . |
| Vv14g0185          | .                  | .                  | .         | .         | . |
| .                  | .                  | .                  | .         | .         | . |
| Vv14g0186          | .                  | .                  | .         | .         | . |
| .                  | .                  | .                  | .         | .         | . |
| Vv14g0187          | .                  | .                  | .         | .         | . |
| .                  | .                  | .                  | .         | .         | . |
| Vv14g0188          | .                  | Gorai.007G303300.1 | .         | .         | . |
| .                  | .                  | .                  | .         | .         | . |
| .                  | .                  | .                  | .         | .         | . |

|              |                    |   |   |   |   |                    |   |
|--------------|--------------------|---|---|---|---|--------------------|---|
| Vv14g0189    | .                  | . | . | . | . | .                  | . |
| .            | .                  | . | . | . | . | .                  | . |
| Vv14g0190    | .                  | . | . | . | . | .                  | . |
| .            | .                  | . | . | . | . | .                  | . |
| Vv14g0191    | .                  | . | . | . | . | .                  | . |
| .            | .                  | . | . | . | . | .                  | . |
| Vv14g0192    | Tc04_g020200       | . | . | . | . | .                  | . |
| .            | .                  | . | . | . | . | .                  | . |
| Vv14g0193    | Tc04_g028700       | . | . | . | . | Gorai.             | . |
| 011G194100.1 | .                  | . | . | . | . | .                  | . |
| Vv14g0194    | .                  | . | . | . | . | .                  | . |
| .            | .                  | . | . | . | . | Vv07g0446          | . |
| Tc01_g031090 | .                  | . | . | . | . | Gorai.004G051500.1 | . |
| .            | .                  | . | . | . | . | .                  | . |
| Vv14g0195    | .                  | . | . | . | . | .                  | . |
| .            | .                  | . | . | . | . | .                  | . |
| Vv14g0196    | .                  | . | . | . | . | .                  | . |
| .            | .                  | . | . | . | . | .                  | . |
| Vv14g0197    | .                  | . | . | . | . | .                  | . |
| .            | .                  | . | . | . | . | .                  | . |
| Vv14g0198    | .                  | . | . | . | . | .                  | . |
| .            | .                  | . | . | . | . | .                  | . |
| Vv14g0199    | Tc05_g001730       | . | . | . | . | .                  | . |
| .            | .                  | . | . | . | . | .                  | . |
| Vv14g0200    | .                  | . | . | . | . | .                  | . |
| .            | .                  | . | . | . | . | .                  | . |
| Vv14g0201    | .                  | . | . | . | . | .                  | . |
| .            | .                  | . | . | . | . | .                  | . |
| Vv14g0202    | .                  | . | . | . | . | .                  | . |
| .            | .                  | . | . | . | . | .                  | . |
| Vv14g0203    | Gorai.013G126600.1 | . | . | . | . | Gorai.007G301500.1 | . |
| .            | .                  | . | . | . | . | .                  | . |
| .            | .                  | . | . | . | . | .                  | . |
| Vv14g0204    | .                  | . | . | . | . | .                  | . |
| .            | .                  | . | . | . | . | .                  | . |
| .            | .                  | . | . | . | . | .                  | . |

|                    |              |                    |   |                    |   |           |
|--------------------|--------------|--------------------|---|--------------------|---|-----------|
| Vv14g0205          | Tc04_g000790 | .                  | . | .                  | . | .         |
| .                  | .            | .                  | . | .                  | . | .         |
| Vv14g0206          | .            | Gorai.013G126400.1 | . | Gorai.007G301200.1 | . | .         |
| .                  | .            | .                  | . | .                  | . | .         |
| .                  | .            | .                  | . | .                  | . | .         |
| Vv14g0207          | .            | .                  | . | .                  | . | .         |
| .                  | .            | .                  | . | .                  | . | .         |
| Vv14g0208          | .            | .                  | . | Gorai.007G127300.1 | . | .         |
| .                  | .            | .                  | . | .                  | . | .         |
| Vv14g0209          | .            | .                  | . | .                  | . | .         |
| Vv05g0031          | .            | .                  | . | Gorai.011G192300.1 | . | .         |
| .                  | .            | .                  | . | .                  | . | .         |
| Vv14g0210          | .            | .                  | . | .                  | . | .         |
| .                  | .            | .                  | . | .                  | . | .         |
| .                  | .            | .                  | . | .                  | . | .         |
| Vv14g0211          | Tc04_g028490 | .                  | . | .                  | . | .         |
| .                  | .            | .                  | . | .                  | . | .         |
| Vv07g0432          | Tc01_g030870 | .                  | . | .                  | . | .         |
| Vv14g0212          | .            | .                  | . | .                  | . | .         |
| .                  | .            | .                  | . | .                  | . | .         |
| .                  | Tc01_g030860 | .                  | . | .                  | . | Vv07g0431 |
| Vv14g0213          | .            | .                  | . | .                  | . | .         |
| .                  | .            | .                  | . | .                  | . | .         |
| .                  | .            | .                  | . | .                  | . | .         |
| Vv14g0214          | .            | .                  | . | .                  | . | .         |
| .                  | .            | .                  | . | .                  | . | .         |
| .                  | .            | .                  | . | .                  | . | .         |
| Vv14g0215          | Tc05_g023060 | .                  | . | .                  | . | .         |
| .                  | .            | .                  | . | .                  | . | .         |
| .                  | .            | .                  | . | .                  | . | .         |
| Vv14g0216          | .            | .                  | . | .                  | . | .         |
| .                  | .            | .                  | . | .                  | . | .         |
| .                  | .            | .                  | . | .                  | . | .         |
| Vv14g0217          | Tc05_g023040 | .                  | . | .                  | . | .         |
| .                  | .            | .                  | . | .                  | . | .         |
| .                  | .            | .                  | . | .                  | . | .         |
| Vv14g0218          | .            | .                  | . | .                  | . | .         |
| .                  | .            | .                  | . | .                  | . | .         |
| .                  | .            | .                  | . | .                  | . | .         |
| Vv14g0219          | Tc04_g028320 | .                  | . | Gorai.007G300700.1 | . | .         |
| Gorai.007G128000.1 | .            | .                  | . | Vv05g0010          | . | .         |
| Tc04_g028320       | .            | .                  | . | .                  | . | Vv07g0413 |
| .                  | Tc01_g030610 | Gorai.007G128000.1 | . | .                  | . | .         |
| Gorai.004G090300.1 | .            | .                  | . | .                  | . | .         |
| Vv14g0220          | .            | .                  | . | .                  | . | .         |
| .                  | .            | .                  | . | .                  | . | .         |



|                    |              |   |                    |   |   |   |   |
|--------------------|--------------|---|--------------------|---|---|---|---|
| Vv14g0221          | .            | . | .                  | . | . | . | . |
| .                  | .            | . | .                  | . | . | . | . |
| Vv14g0222          | Tc05_g005630 | . | .                  | . | . | . | . |
| .                  | .            | . | .                  | . | . | . | . |
| Vv14g0223          | .            | . | .                  | . | . | . | . |
| .                  | .            | . | .                  | . | . | . | . |
| Vv14g0224          | Tc04_g000930 | . | .                  | . | . | . | . |
| Gorai.012G061700.1 | .            | . | .                  | . | . | . | . |
| Vv14g0225          | Tc05_g005300 | . | .                  | . | . | . | . |
| .                  | .            | . | .                  | . | . | . | . |
| Vv14g0226          | .            | . | .                  | . | . | . | . |
| .                  | .            | . | .                  | . | . | . | . |
| Vv14g0227          | .            | . | .                  | . | . | . | . |
| .                  | .            | . | .                  | . | . | . | . |
| Vv14g0228          | .            | . | .                  | . | . | . | . |
| .                  | .            | . | .                  | . | . | . | . |
| Vv14g0229          | .            | . | .                  | . | . | . | . |
| .                  | .            | . | .                  | . | . | . | . |
| Vv14g0230          | .            | . | Gorai.007G300000.1 | . | . | . | . |
| .                  | .            | . | .                  | . | . | . | . |
| Vv14g0231          | .            | . | .                  | . | . | . | . |
| .                  | .            | . | .                  | . | . | . | . |
| Vv14g0232          | Tc04_g020360 | . | Gorai.007G299900.1 | . | . | . | . |
| Gorai.007G129000.1 | .            | . | .                  | . | . | . | . |
| .                  | .            | . | .                  | . | . | . | . |
| Vv14g0233          | .            | . | .                  | . | . | . | . |
| .                  | .            | . | .                  | . | . | . | . |
| Vv14g0234          | .            | . | .                  | . | . | . | . |
| .                  | .            | . | .                  | . | . | . | . |
| Vv14g0235          | .            | . | .                  | . | . | . | . |
| .                  | .            | . | .                  | . | . | . | . |
| Vv14g0236          | .            | . | .                  | . | . | . | . |
| .                  | .            | . | .                  | . | . | . | . |
| .                  | .            | . | .                  | . | . | . | . |

|                    |              |   |   |                    |                    |           |   |
|--------------------|--------------|---|---|--------------------|--------------------|-----------|---|
| Vv14g0237          | .            | . | . | .                  | .                  | .         | . |
| .                  | .            | . | . | .                  | .                  | .         | . |
| Vv14g0238          | .            | . | . | .                  | .                  | .         | . |
| .                  | .            | . | . | .                  | .                  | .         | . |
| Vv14g0239          | .            | . | . | .                  | .                  | .         | . |
| .                  | .            | . | . | .                  | .                  | .         | . |
| Vv14g0240          | .            | . | . | .                  | .                  | .         | . |
| .                  | .            | . | . | .                  | .                  | .         | . |
| Vv14g0241          | .            | . | . | .                  | .                  | .         | . |
|                    |              |   |   |                    |                    | Vv07g0377 | . |
|                    | Tc01_g030370 | . |   | Gorai.008G146200.1 | .                  | .         | . |
| Gorai.004G052500.1 | .            | . | . | .                  | .                  | .         | . |
| Vv14g0242          | .            | . | . | .                  | .                  | .         | . |
| .                  | .            | . | . | .                  | .                  | .         | . |
| Vv14g0243          | Tc04_g003320 | . | . | .                  | .                  | .         | . |
| .                  | .            | . | . | .                  | .                  | .         | . |
| Vv14g0244          | Tc04_g028210 | . |   | Gorai.013G126000.1 | .                  | .         | . |
| .                  | .            | . | . | .                  | .                  | .         | . |
| Vv14g0245          | .            | . | . | .                  | .                  | .         | . |
| .                  | .            | . | . | .                  | .                  | .         | . |
| Vv14g0246          | .            | . | . |                    | Gorai.013G205600.1 | .         | . |
| .                  | .            | . | . | .                  | .                  | .         | . |
| Vv14g0247          | .            | . | . | .                  | .                  | .         | . |
| .                  | .            | . | . | .                  | .                  | .         | . |
| Vv14g0248          | .            | . | . | .                  | .                  | .         | . |
| Vv05g0006          | .            | . | . | .                  | .                  | .         | . |
| .                  | .            | . | . | .                  | .                  | .         | . |
| Vv14g0249          | .            | . | . | .                  | .                  | .         | . |
| .                  | .            | . | . | .                  | .                  | .         | . |
| Vv14g0250          | .            | . | . | .                  | .                  | .         | . |
| .                  | .            | . | . | .                  | .                  | .         | . |
| Vv14g0251          | .            | . | . | .                  | .                  | .         | . |
| .                  | .            | . | . | .                  | .                  | .         | . |
| Vv14g0252          | .            | . |   | Gorai.007G299500.1 | .                  | .         | . |
| .                  | .            | . | . | .                  | .                  | .         | . |
| Vv14g0253          | .            | . | . | .                  | .                  | .         | . |

|           |                    |                    |                    |                    |   |   |   |
|-----------|--------------------|--------------------|--------------------|--------------------|---|---|---|
| .         | .                  | .                  | .                  | .                  | . | . | . |
| Vv14g0254 | .                  | Gorai.013G125400.1 | .                  | Gorai.007G299400.1 | . | . | . |
| .         | .                  | .                  | .                  | .                  | . | . | . |
| .         | .                  | .                  | .                  | .                  | . | . | . |
| Vv14g0255 | Tc04_g017400       | Gorai.013G125300.1 | .                  | .                  | . | . | . |
|           | Gorai.011G134000.1 | .                  | .                  | .                  | . | . | . |
| .         | .                  | .                  | .                  | .                  | . | . | . |
| .         | .                  | .                  | .                  | .                  | . | . | . |
| Vv14g0256 | Tc04_g001160       | .                  | Gorai.007G299200.1 | .                  | . | . | . |
|           | Gorai.006G031200.1 | Gorai.012G063000.1 | .                  | .                  | . | . | . |
| .         | .                  | .                  | .                  | .                  | . | . | . |
| .         | .                  | .                  | .                  | .                  | . | . | . |
| Vv14g0257 | Tc04_g017700       | .                  | Gorai.007G299100.1 | .                  | . | . | . |
|           | Gorai.011G136900.1 | .                  | .                  | .                  | . | . | . |
| .         | .                  | .                  | .                  | .                  | . | . | . |
| .         | .                  | .                  | .                  | .                  | . | . | . |
| Vv14g0258 | .                  | .                  | .                  | .                  | . | . | . |
| .         | .                  | .                  | .                  | .                  | . | . | . |
| .         | .                  | .                  | .                  | .                  | . | . | . |
| Vv14g0259 | Tc05_g028760       | .                  | Gorai.007G299000.1 | .                  | . | . | . |
| .         | .                  | .                  | .                  | .                  | . | . | . |
| .         | .                  | .                  | .                  | .                  | . | . | . |
| Vv14g0260 | .                  | .                  | .                  | .                  | . | . | . |
| .         | .                  | .                  | .                  | .                  | . | . | . |
| .         | .                  | .                  | .                  | .                  | . | . | . |
| Vv14g0261 | Tc05_g028810       | Gorai.013G125200.1 | .                  | .                  | . | . | . |
|           | Gorai.007G129500.1 | .                  | Vv07g0345          | .                  | . | . | . |
|           | Tc01_g030060       | Gorai.007G129500.1 | .                  | .                  | . | . | . |
| .         | .                  | .                  | .                  | .                  | . | . | . |
| .         | .                  | .                  | .                  | .                  | . | . | . |
| Vv14g0262 | .                  | .                  | .                  | .                  | . | . | . |
| .         | .                  | .                  | .                  | .                  | . | . | . |
| .         | .                  | .                  | .                  | .                  | . | . | . |
| Vv14g0263 | Tc04_g027960       | .                  | Gorai.007G298900.1 | .                  | . | . | . |
| .         | .                  | .                  | .                  | .                  | . | . | . |
| .         | .                  | .                  | .                  | .                  | . | . | . |
| Vv14g0264 | Tc04_g027950       | .                  | .                  | .                  | . | . | . |
| .         | .                  | .                  | .                  | .                  | . | . | . |
| .         | .                  | .                  | .                  | .                  | . | . | . |
| Vv14g0265 | .                  | Gorai.013G125100.1 | .                  | Gorai.007G298800.1 | . | . | . |
|           | Gorai.013G205300.1 | .                  | .                  | .                  | . | . | . |
| .         | .                  | .                  | .                  | .                  | . | . | . |
| .         | .                  | .                  | .                  | .                  | . | . | . |
| Vv14g0266 | .                  | .                  | .                  | .                  | . | . | . |
| .         | .                  | .                  | .                  | .                  | . | . | . |
| .         | .                  | .                  | .                  | .                  | . | . | . |
| Vv14g0267 | .                  | .                  | Gorai.007G298700.1 | .                  | . | . | . |
| .         | .                  | .                  | .                  | .                  | . | . | . |
| .         | .                  | .                  | .                  | .                  | . | . | . |

|           |              |   |                    |   |   |
|-----------|--------------|---|--------------------|---|---|
| Vv14g0268 | .            | . | Gorai.007G298600.1 | . | . |
| .         | .            | . | .                  | . | . |
| Vv14g0269 | .            | . | .                  | . | . |
| .         | .            | . | .                  | . | . |
| Vv14g0270 | Tc04_g003160 | . | .                  | . | . |
| .         | .            | . | .                  | . | . |
| Vv14g0271 | .            | . | .                  | . | . |
| .         | .            | . | .                  | . | . |
| Vv14g0272 | .            | . | .                  | . | . |
| .         | .            | . | .                  | . | . |
| Vv14g0273 | .            | . | .                  | . | . |
| .         | .            | . | .                  | . | . |
| Vv14g0274 | .            | . | .                  | . | . |
| .         | .            | . | .                  | . | . |
| Vv14g0275 | .            | . | .                  | . | . |
| .         | .            | . | .                  | . | . |
| Vv14g0276 | .            | . | .                  | . | . |
| .         | .            | . | .                  | . | . |
| Vv14g0277 | .            | . | .                  | . | . |
| .         | .            | . | .                  | . | . |
| Vv14g0278 | .            | . | .                  | . | . |
| .         | .            | . | .                  | . | . |
| Vv14g0279 | .            | . | .                  | . | . |
| .         | .            | . | .                  | . | . |
| Vv14g0280 | .            | . | .                  | . | . |
| .         | .            | . | .                  | . | . |
| Vv14g0281 | .            | . | .                  | . | . |
| .         | .            | . | .                  | . | . |
| Vv14g0282 | .            | . | .                  | . | . |
| .         | .            | . | .                  | . | . |
| Vv14g0283 | .            | . | .                  | . | . |
| .         | .            | . | .                  | . | . |
| Vv14g0284 | Tc04_g003140 | . | .                  | . | . |
| .         | .            | . | .                  | . | . |

|                    |              |   |                    |                    |   |   |   |
|--------------------|--------------|---|--------------------|--------------------|---|---|---|
| Vv14g0285          | .            | . | .                  | .                  | . | . | . |
| .                  | .            | . | .                  | .                  | . | . | . |
| Vv14g0286          | Tc04_g027920 | . | Gorai.013G124900.1 | .                  | . | . | . |
| .                  | Vv07g0329    | . | Tc01_g029930       | Gorai.             | . | . | . |
| 007G130000.1       | .            | . | Gorai.004G053000.1 | .                  | . | . | . |
| .                  | .            | . | .                  | .                  | . | . | . |
| Vv14g0287          | .            | . | .                  | .                  | . | . | . |
| .                  | .            | . | .                  | .                  | . | . | . |
| Vv14g0288          | Tc04_g027900 | . | .                  | Gorai.007G129900.1 | . | . | . |
| Gorai.011G189100.1 | .            | . | .                  | .                  | . | . | . |
| .                  | .            | . | .                  | .                  | . | . | . |
| Vv14g0289          | .            | . | .                  | .                  | . | . | . |
| .                  | .            | . | .                  | .                  | . | . | . |
| Vv14g0290          | .            | . | Gorai.007G298500.1 | .                  | . | . | . |
| .                  | .            | . | .                  | .                  | . | . | . |
| Vv14g0291          | .            | . | .                  | .                  | . | . | . |
| .                  | .            | . | .                  | .                  | . | . | . |
| Vv14g0292          | .            | . | .                  | .                  | . | . | . |
| .                  | .            | . | .                  | .                  | . | . | . |
| Vv14g0293          | .            | . | .                  | .                  | . | . | . |
| .                  | .            | . | .                  | .                  | . | . | . |
| Vv14g0294          | .            | . | .                  | .                  | . | . | . |
| .                  | .            | . | .                  | .                  | . | . | . |
| Vv14g0295          | .            | . | .                  | .                  | . | . | . |
| .                  | .            | . | .                  | .                  | . | . | . |
| Vv14g0296          | .            | . | .                  | .                  | . | . | . |
| .                  | .            | . | .                  | .                  | . | . | . |
| Vv14g0297          | .            | . | .                  | .                  | . | . | . |
| .                  | .            | . | .                  | .                  | . | . | . |
| Vv14g0298          | .            | . | .                  | .                  | . | . | . |
| .                  | .            | . | .                  | .                  | . | . | . |
| Vv14g0299          | .            | . | .                  | .                  | . | . | . |
| .                  | .            | . | .                  | .                  | . | . | . |
| Vv14g0300          | .            | . | .                  | .                  | . | . | . |
| .                  | .            | . | .                  | .                  | . | . | . |



|                    |                    |                    |   |        |
|--------------------|--------------------|--------------------|---|--------|
| Vv14g0317          | .                  | Gorai.013G124600.1 | . | Gorai. |
| 013G202200.1       | .                  | Gorai.007G342200.1 | . | .      |
| .                  | .                  | .                  | . | .      |
| Vv14g0318          | .                  | .                  | . | .      |
| .                  | .                  | .                  | . | .      |
| Vv14g0319          | .                  | Gorai.007G297700.1 | . | .      |
| .                  | .                  | .                  | . | .      |
| Vv14g0320          | .                  | .                  | . | .      |
| .                  | .                  | .                  | . | .      |
| Vv14g0321          | .                  | .                  | . | .      |
| .                  | .                  | .                  | . | .      |
| Vv14g0322          | Tc04_g023850       | .                  | . | .      |
| .                  | .                  | .                  | . | .      |
| Vv14g0323          | .                  | .                  | . | .      |
| Vv05g0519          | Tc04_g023490       | Gorai.006G238200.1 | . | Gorai. |
| 005G041900.1       | .                  | .                  | . | .      |
| .                  | .                  | .                  | . | .      |
| Vv14g0324          | Gorai.013G124500.1 | .                  | . | .      |
| .                  | .                  | .                  | . | .      |
| Vv14g0325          | Tc04_g023490       | .                  | . | .      |
| .                  | .                  | .                  | . | .      |
| Vv14g0326          | .                  | .                  | . | .      |
| .                  | .                  | .                  | . | .      |
| Vv14g0327          | Gorai.013G124300.1 | .                  | . | .      |
| .                  | .                  | .                  | . | .      |
| Vv14g0328          | .                  | Gorai.007G297300.1 | . | .      |
| Gorai.007G342300.1 | .                  | .                  | . | .      |
| .                  | .                  | .                  | . | .      |
| Vv14g0329          | .                  | .                  | . | .      |
| .                  | .                  | .                  | . | .      |
| Vv14g0330          | .                  | .                  | . | .      |
| .                  | .                  | .                  | . | .      |
| Vv14g0331          | Tc04_g023400       | .                  | . | Gorai. |
| 007G342400.1       | Gorai.002G023900.1 | Vv05g0508          | . | .      |
| Tc04_g023400       | .                  | Gorai.006G052200.1 | . | .      |
| Gorai.002G023900.1 | .                  | .                  | . | .      |





|              |              |                    |                    |        |                    |   |   |
|--------------|--------------|--------------------|--------------------|--------|--------------------|---|---|
| Vv14g0348    | .            | .                  | .                  | .      | .                  | . | . |
| .            | .            | .                  | .                  | .      | .                  | . | . |
| Vv14g0349    | Tc04_g021990 | .                  | .                  | .      | .                  | . | . |
| .            | .            | .                  | .                  | .      | .                  | . | . |
| Vv14g0350    | .            | .                  | .                  | .      | .                  | . | . |
| .            | .            | .                  | .                  | .      | .                  | . | . |
| Vv14g0351    | .            | .                  | .                  | .      | .                  | . | . |
| .            | .            | .                  | .                  | .      | .                  | . | . |
| Vv14g0352    | .            | .                  | .                  | .      | .                  | . | . |
| .            | .            | .                  | .                  | .      | .                  | . | . |
| Vv14g0353    | .            | .                  | .                  | .      | .                  | . | . |
| .            | .            | .                  | .                  | .      | .                  | . | . |
| Vv14g0354    | Tc04_g021800 | .                  | .                  | .      | .                  | . | . |
| .            | .            | .                  | .                  | .      | .                  | . | . |
| Vv14g0355    | .            | .                  | Gorai.007G297100.1 | .      | .                  | . | . |
| .            | .            | .                  | .                  | .      | .                  | . | . |
| Vv14g0356    | .            | .                  | .                  | .      | .                  | . | . |
| .            | .            | .                  | .                  | .      | .                  | . | . |
| Vv14g0357    | .            | .                  | .                  | .      | .                  | . | . |
| .            | .            | .                  | .                  | .      | .                  | . | . |
| Vv14g0358    | .            | .                  | Gorai.007G297000.1 | .      | .                  | . | . |
| .            | .            | .                  | .                  | .      | .                  | . | . |
| Vv14g0359    | Tc04_g025820 | .                  | .                  | .      | .                  | . | . |
| .            | .            | .                  | .                  | .      | .                  | . | . |
| Vv14g0360    | .            | .                  | Gorai.007G296800.1 | .      | .                  | . | . |
| .            | .            | .                  | .                  | .      | .                  | . | . |
| Vv14g0361    | Tc04_g023240 | .                  | .                  | .      | .                  | . | . |
| .            | .            | .                  | .                  | .      | .                  | . | . |
| Vv14g0362    | Tc05_g031480 | Gorai.013G123900.1 | .                  | Gorai. | .                  | . | . |
| 007G296600.1 | .            | .                  | .                  | .      | .                  | . | . |
| .            | .            | .                  | .                  | .      | .                  | . | . |
| Vv14g0363    | .            | .                  | .                  | .      | .                  | . | . |
| .            | .            | .                  | .                  | .      | .                  | . | . |
| Vv14g0364    | .            | .                  | .                  | .      | Gorai.007G342600.1 | . | . |

|                    |                    |                    |                    |                    |   |   |   |
|--------------------|--------------------|--------------------|--------------------|--------------------|---|---|---|
| .                  | .                  | .                  | .                  | .                  | . | . | . |
| Vv07g0218          | .                  | .                  | .                  | .                  | . | . | . |
| Gorai.004G241600.1 | .                  | .                  | .                  | .                  | . | . | . |
| Vv14g0365          | Tc04_g023230       | .                  | Gorai.007G296500.1 | .                  | . | . | . |
| .                  | Vv05g0490          | .                  | Tc04_g023230       | .                  | . | . | . |
| Gorai.005G041300.1 | .                  | .                  | .                  | .                  | . | . | . |
| .                  | .                  | .                  | .                  | .                  | . | . | . |
| Vv14g0366          | .                  | .                  | Gorai.007G296400.1 | .                  | . | . | . |
| .                  | .                  | .                  | .                  | .                  | . | . | . |
| .                  | .                  | .                  | .                  | .                  | . | . | . |
| Vv14g0367          | Tc04_g023220       | .                  | .                  | .                  | . | . | . |
| .                  | .                  | .                  | .                  | .                  | . | . | . |
| .                  | .                  | .                  | .                  | .                  | . | . | . |
| Vv14g0368          | .                  | .                  | Gorai.007G296200.1 | .                  | . | . | . |
| .                  | .                  | .                  | .                  | .                  | . | . | . |
| .                  | .                  | .                  | .                  | .                  | . | . | . |
| Vv14g0369          | .                  | .                  | .                  | .                  | . | . | . |
| .                  | .                  | .                  | .                  | .                  | . | . | . |
| .                  | .                  | .                  | .                  | .                  | . | . | . |
| Vv14g0370          | Tc04_g023210       | Gorai.013G123800.1 | .                  | .                  | . | . | . |
| .                  | Gorai.006G052800.1 | Vv05g0489          | .                  | .                  | . | . | . |
| Tc04_g023210       | Gorai.005G041200.1 | .                  | .                  | .                  | . | . | . |
| .                  | .                  | .                  | .                  | .                  | . | . | . |
| Vv14g0371          | Tc04_g023170       | Gorai.007G296100.1 | .                  | .                  | . | . | . |
| .                  | .                  | .                  | .                  | .                  | . | . | . |
| .                  | .                  | .                  | .                  | .                  | . | . | . |
| Vv14g0372          | .                  | Gorai.007G296000.1 | .                  | .                  | . | . | . |
| Gorai.007G342800.1 | .                  | .                  | .                  | .                  | . | . | . |
| .                  | .                  | .                  | .                  | .                  | . | . | . |
| .                  | .                  | .                  | .                  | .                  | . | . | . |
| Vv14g0373          | .                  | Gorai.007G295900.1 | .                  | .                  | . | . | . |
| .                  | .                  | .                  | .                  | .                  | . | . | . |
| .                  | .                  | .                  | .                  | .                  | . | . | . |
| Vv14g0374          | .                  | .                  | .                  | .                  | . | . | . |
| .                  | .                  | .                  | .                  | .                  | . | . | . |
| .                  | .                  | .                  | .                  | .                  | . | . | . |
| Vv14g0375          | .                  | .                  | .                  | .                  | . | . | . |
| .                  | .                  | .                  | .                  | .                  | . | . | . |
| .                  | .                  | .                  | .                  | .                  | . | . | . |
| Vv14g0376          | .                  | .                  | .                  | Gorai.007G343000.1 | . | . | . |
| .                  | .                  | .                  | .                  | .                  | . | . | . |
| .                  | .                  | .                  | .                  | .                  | . | . | . |
| Vv14g0377          | .                  | .                  | .                  | .                  | . | . | . |
| .                  | .                  | .                  | .                  | .                  | . | . | . |
| .                  | .                  | .                  | .                  | .                  | . | . | . |
| Vv14g0378          | .                  | .                  | .                  | .                  | . | . | . |
| .                  | .                  | .                  | .                  | .                  | . | . | . |
| .                  | .                  | .                  | .                  | .                  | . | . | . |
| Vv14g0379          | .                  | .                  | .                  | .                  | . | . | . |
| .                  | .                  | .                  | .                  | .                  | . | . | . |

|                    |                    |                    |                    |        |        |   |   |
|--------------------|--------------------|--------------------|--------------------|--------|--------|---|---|
| Vv14g0380          | .                  | .                  | .                  | .      | .      | . | . |
| .                  | .                  | .                  | .                  | .      | .      | . | . |
| Vv14g0381          | .                  | .                  | Gorai.007G295500.1 | .      | .      | . | . |
| .                  | .                  | .                  | .                  | .      | .      | . | . |
| Vv14g0382          | .                  | .                  | .                  | .      | .      | . | . |
| .                  | .                  | .                  | .                  | .      | .      | . | . |
| Vv14g0383          | .                  | .                  | .                  | .      | .      | . | . |
| .                  | .                  | .                  | .                  | .      | .      | . | . |
| Vv14g0384          | .                  | .                  | .                  | .      | .      | . | . |
| .                  | .                  | .                  | .                  | .      | .      | . | . |
| Vv14g0385          | .                  | .                  | .                  | .      | .      | . | . |
| Vv05g0470          | .                  | .                  | .                  | .      | .      | . | . |
| .                  | .                  | .                  | .                  | .      | .      | . | . |
| Vv14g0386          | Tc04_g022980       | .                  | .                  | .      | .      | . | . |
| Vv05g0468          | Tc04_g022990       | .                  | .                  | .      | .      | . | . |
| .                  | .                  | .                  | .                  | .      | .      | . | . |
| Vv14g0387          | Tc04_g022960       | .                  | Gorai.007G295400.1 | .      | .      | . | . |
| .                  | Gorai.004G215700.1 | .                  | Vv05g0467          | .      | .      | . | . |
| Tc04_g022970       | .                  | .                  | .                  | .      | .      | . | . |
| .                  | .                  | .                  | .                  | .      | .      | . | . |
| Vv14g0388          | Tc04_g022920       | .                  | Gorai.007G295300.1 | .      | .      | . | . |
| .                  | Vv05g0464          | .                  | Tc04_g022920       | .      | .      | . | . |
| Gorai.006G054000.1 | .                  | .                  | .                  | .      | .      | . | . |
| .                  | .                  | .                  | .                  | .      | .      | . | . |
| Vv14g0389          | Tc04_g025620       | .                  | .                  | .      | Gorai. | . | . |
| 006G053800.1       | Vv05g0463          | .                  | Tc04_g022910       | .      | .      | . | . |
| Gorai.006G053800.1 | .                  | .                  | Vv07g0236          | .      | .      | . | . |
| Tc01_g028920       | Gorai.007G133700.1 | .                  | .                  | .      | Gorai. | . | . |
| 004G054800.1       | .                  | .                  | .                  | .      | .      | . | . |
| Vv14g0390          | .                  | .                  | .                  | .      | .      | . | . |
| .                  | .                  | .                  | .                  | .      | .      | . | . |
| .                  | .                  | .                  | .                  | .      | .      | . | . |
| Vv14g0391          | Tc04_g027640       | .                  | .                  | .      | .      | . | . |
| .                  | .                  | .                  | .                  | .      | .      | . | . |
| .                  | .                  | .                  | .                  | .      | .      | . | . |
| Vv14g0392          | .                  | .                  | Gorai.013G204500.1 | .      | .      | . | . |
| .                  | .                  | .                  | .                  | .      | .      | . | . |
| .                  | .                  | .                  | .                  | .      | .      | . | . |
| Vv14g0393          | Tc04_g016350       | .                  | Gorai.007G294900.1 | .      | .      | . | . |
| Gorai.013G204400.1 | .                  | .                  | .                  | .      | .      | . | . |
| .                  | .                  | .                  | .                  | .      | .      | . | . |
| .                  | .                  | .                  | .                  | .      | .      | . | . |
| Vv14g0394          | .                  | Gorai.007G294800.1 | .                  | Gorai. | .      | . | . |
| 013G204300.1       | Gorai.006G054300.1 | .                  | .                  | .      | .      | . | . |

|              |              |                    |                    |  |  |        |  |
|--------------|--------------|--------------------|--------------------|--|--|--------|--|
| Vv14g0395    |              |                    |                    |  |  |        |  |
| Vv14g0396    |              | Gorai.013G123700.1 |                    |  |  |        |  |
| Vv14g0397    |              |                    |                    |  |  |        |  |
| Vv14g0398    |              |                    |                    |  |  |        |  |
| Vv13g1059    |              |                    |                    |  |  |        |  |
| Vv14g0399    |              |                    |                    |  |  |        |  |
| Vv14g0400    | Tc05_g031530 |                    |                    |  |  |        |  |
| Vv14g0401    |              | Gorai.007G294200.1 |                    |  |  |        |  |
| Vv14g0402    |              | Gorai.007G294100.1 |                    |  |  | Gorai. |  |
| 013G204100.1 |              |                    |                    |  |  |        |  |
| Vv14g0403    |              |                    |                    |  |  |        |  |
| Vv14g0404    | Tc04_g027370 |                    | Gorai.007G294000.1 |  |  |        |  |
| Vv14g0405    |              |                    |                    |  |  |        |  |
| Vv14g0406    |              |                    |                    |  |  |        |  |
| Vv14g0407    |              |                    |                    |  |  |        |  |
| Vv14g0408    |              |                    |                    |  |  |        |  |
| Vv14g0409    |              |                    |                    |  |  |        |  |
| Vv14g0410    |              |                    |                    |  |  |        |  |

|                    |                    |                    |   |           |                    |        |   |
|--------------------|--------------------|--------------------|---|-----------|--------------------|--------|---|
| Vv14g0411          | .                  | .                  | . | .         | .                  | .      | . |
| .                  | .                  | .                  | . | .         | .                  | .      | . |
| Vv14g0412          | Tc04_g016370       | .                  | . | .         | .                  | Gorai. | . |
| 011G127800.1       | .                  | .                  | . | .         | .                  | .      | . |
| Vv14g0413          | .                  | .                  | . | .         | .                  | .      | . |
| .                  | .                  | .                  | . | .         | .                  | .      | . |
| Vv14g0414          | .                  | .                  | . | .         | .                  | .      | . |
| .                  | .                  | .                  | . | .         | .                  | .      | . |
| Vv14g0415          | .                  | Gorai.013G123500.1 | . | .         | Gorai.007G293800.1 | .      | . |
| .                  | .                  | .                  | . | .         | .                  | .      | . |
| .                  | .                  | .                  | . | .         | .                  | .      | . |
| Vv14g0416          | .                  | Gorai.013G123400.1 | . | .         | Gorai.             | .      | . |
| 007G133300.1       | .                  | Gorai.004G215100.1 | . | .         | .                  | .      | . |
| .                  | .                  | .                  | . | Vv07g0246 | .                  | .      | . |
| Tc01_g029050       | Gorai.007G133300.1 | .                  | . | .         | .                  | .      | . |
| Gorai.004G215100.1 | .                  | .                  | . | .         | .                  | .      | . |
| Vv14g0417          | .                  | .                  | . | .         | .                  | .      | . |
| .                  | .                  | .                  | . | .         | .                  | .      | . |
| Vv14g0418          | Tc04_g023450       | .                  | . | .         | .                  | .      | . |
| Vv13g1080          | .                  | .                  | . | .         | .                  | .      | . |
| Vv14g0419          | .                  | .                  | . | .         | .                  | .      | . |
| Vv13g1081          | .                  | .                  | . | .         | .                  | .      | . |
| Vv14g0420          | .                  | Gorai.013G120800.1 | . | .         | Gorai.007G292500.1 | .      | . |
| .                  | .                  | .                  | . | .         | .                  | .      | . |
| .                  | .                  | .                  | . | .         | .                  | .      | . |
| Vv14g0421          | .                  | Gorai.007G292400.1 | . | .         | .                  | .      | . |
| .                  | Vv13g1082          | .                  | . | .         | .                  | .      | . |
| Vv14g0422          | .                  | .                  | . | .         | .                  | .      | . |
| .                  | .                  | .                  | . | .         | .                  | .      | . |
| Vv14g0423          | Tc04_g023430       | .                  | . | .         | .                  | .      | . |
| .                  | .                  | .                  | . | .         | .                  | .      | . |
| Vv14g0424          | Tc04_g023420       | .                  | . | .         | .                  | .      | . |
| .                  | .                  | .                  | . | .         | .                  | .      | . |
| Vv14g0425          | .                  | .                  | . | .         | .                  | .      | . |
| .                  | .                  | .                  | . | .         | .                  | .      | . |
| .                  | .                  | .                  | . | .         | .                  | .      | . |

|                    |                    |   |                    |   |              |   |   |
|--------------------|--------------------|---|--------------------|---|--------------|---|---|
| Vv14g0426          | .                  | . | .                  | . | .            | . | . |
| .                  | .                  | . | .                  | . | .            | . | . |
| Vv14g0427          | .                  | . | .                  | . | .            | . | . |
| .                  | .                  | . | .                  | . | .            | . | . |
| Vv14g0428          | .                  | . | .                  | . | .            | . | . |
| .                  | .                  | . | .                  | . | .            | . | . |
| Vv14g0429          | .                  | . | .                  | . | .            | . | . |
| .                  | .                  | . | .                  | . | .            | . | . |
| Vv14g0430          | .                  | . | .                  | . | .            | . | . |
| .                  | .                  | . | .                  | . | .            | . | . |
| Vv14g0431          | Tc04_g027160       | . | Gorai.007G292300.1 | . | .            | . | . |
|                    | Gorai.011G183500.1 | . | Vv13g1084          | . | .            | . | . |
| .                  | .                  | . | .                  | . | .            | . | . |
| Vv14g0432          | .                  | . | .                  | . | .            | . | . |
| .                  | .                  | . | .                  | . | .            | . | . |
| Vv14g0433          | .                  | . | .                  | . | .            | . | . |
| Vv13g1089          | .                  | . | .                  | . | .            | . | . |
| .                  | .                  | . | .                  | . | .            | . | . |
| Vv14g0434          | .                  | . | Gorai.007G292200.1 | . | Gorai.       | . | . |
| 013G203800.1       | .                  | . | Vv13g1090          | . | .            | . | . |
| .                  | .                  | . | .                  | . | .            | . | . |
| Vv14g0435          | .                  | . | .                  | . | .            | . | . |
| .                  | .                  | . | .                  | . | .            | . | . |
| Vv14g0436          | .                  | . | .                  | . | .            | . | . |
| .                  | .                  | . | .                  | . | .            | . | . |
| Vv14g0437          | .                  | . | .                  | . | .            | . | . |
| .                  | .                  | . | .                  | . | .            | . | . |
| Vv14g0438          | Tc05_g031690       | . | .                  | . | .            | . | . |
| .                  | .                  | . | .                  | . | .            | . | . |
| Vv14g0439          | .                  | . | .                  | . | .            | . | . |
| .                  | .                  | . | .                  | . | .            | . | . |
| Vv14g0440          | .                  | . | Gorai.007G291800.1 | . | Gorai.       | . | . |
| 013G203700.1       | .                  | . | Vv07g0258          | . | Tc01_g029170 | . | . |
| .                  | .                  | . | .                  | . | .            | . | . |
| Vv14g0441          | Tc04_g027120       | . | Gorai.007G291700.1 | . | .            | . | . |
| Gorai.007G132900.1 | .                  | . | Vv07g0259          | . | .            | . | . |

|                    |                    |                    |                    |        |   |
|--------------------|--------------------|--------------------|--------------------|--------|---|
| Tc01_g029180       | Gorai.007G132900.1 | .                  | .                  | .      | . |
| Vv14g0442          | Tc04_g027130       | .                  | Gorai.007G291600.1 | .      | . |
|                    | Gorai.011G183200.1 | .                  | .                  | .      | . |
| Vv14g0443          | .                  | .                  | Gorai.007G291400.1 | .      | . |
| Vv14g0444          | .                  | .                  | Gorai.007G132800.1 | .      | . |
|                    | Gorai.004G214300.1 | Vv07g0264          | Tc01_g029220       | .      | . |
| Gorai.007G132800.1 | .                  | .                  | Gorai.004G214300.1 | .      | . |
| Vv14g0445          | .                  | .                  | .                  | .      | . |
| Vv14g0446          | .                  | .                  | Gorai.007G291200.1 | .      | . |
|                    | Gorai.004G214100.1 | Vv07g0267          | Tc01_g029250       | .      | . |
|                    | .                  | Gorai.004G239900.1 | .                  | .      | . |
| Vv14g0447          | .                  | .                  | Gorai.007G291100.1 | .      | . |
| Vv14g0448          | .                  | .                  | Gorai.007G288200.1 | .      | . |
| Vv14g0449          | .                  | .                  | .                  | Gorai. | . |
| 004G211800.1       | .                  | .                  | .                  | .      | . |
| Vv14g0450          | .                  | .                  | .                  | .      | . |
| Vv14g0451          | .                  | .                  | Gorai.013G203400.1 | .      | . |
| Vv14g0452          | .                  | .                  | .                  | .      | . |
| Vv14g0453          | .                  | .                  | Gorai.013G200700.1 | .      | . |
| Vv14g0454          | .                  | .                  | .                  | .      | . |
| Vv14g0455          | .                  | .                  | .                  | .      | . |
| Vv14g0456          | .                  | .                  | .                  | .      | . |

|           |              |                    |   |   |   |   |   |
|-----------|--------------|--------------------|---|---|---|---|---|
| Vv14g0457 | .            | .                  | . | . | . | . | . |
| .         | .            | .                  | . | . | . | . | . |
| Vv14g0458 | .            | .                  | . | . | . | . | . |
| .         | .            | .                  | . | . | . | . | . |
| Vv14g0459 | .            | .                  | . | . | . | . | . |
| .         | .            | .                  | . | . | . | . | . |
| Vv14g0460 | .            | .                  | . | . | . | . | . |
| .         | .            | .                  | . | . | . | . | . |
| Vv14g0461 | .            | .                  | . | . | . | . | . |
| .         | .            | .                  | . | . | . | . | . |
| Vv14g0462 | .            | Gorai.013G115800.1 | . | . | . | . | . |
| .         | .            | .                  | . | . | . | . | . |
| Vv14g0463 | .            | .                  | . | . | . | . | . |
| .         | .            | .                  | . | . | . | . | . |
| Vv14g0464 | .            | .                  | . | . | . | . | . |
| .         | .            | .                  | . | . | . | . | . |
| Vv14g0465 | .            | .                  | . | . | . | . | . |
| .         | .            | .                  | . | . | . | . | . |
| Vv14g0466 | .            | .                  | . | . | . | . | . |
| .         | .            | .                  | . | . | . | . | . |
| Vv14g0467 | .            | .                  | . | . | . | . | . |
| .         | .            | .                  | . | . | . | . | . |
| Vv14g0468 | .            | .                  | . | . | . | . | . |
| .         | .            | .                  | . | . | . | . | . |
| Vv14g0469 | .            | Gorai.013G115900.1 | . | . | . | . | . |
| .         | .            | .                  | . | . | . | . | . |
| Vv14g0470 | .            | .                  | . | . | . | . | . |
| .         | .            | .                  | . | . | . | . | . |
| Vv14g0471 | .            | Gorai.013G116000.1 | . | . | . | . | . |
| .         | Vv07g0285    | .                  | . | . | . | . | . |
| Vv14g0472 | Tc05_g030310 | Gorai.013G116100.1 | . | . | . | . | . |
| .         | .            | .                  | . | . | . | . | . |
| Vv14g0473 | Tc04_g027280 | .                  | . | . | . | . | . |
| .         | .            | .                  | . | . | . | . | . |



|           |              |                    |                    |                    |   |   |   |
|-----------|--------------|--------------------|--------------------|--------------------|---|---|---|
| Vv14g0474 | .            | .                  | .                  | .                  | . | . | . |
| .         | .            | .                  | .                  | .                  | . | . | . |
| Vv14g0475 | .            | .                  | .                  | .                  | . | . | . |
| .         | .            | .                  | .                  | .                  | . | . | . |
| Vv14g0476 | .            | .                  | .                  | .                  | . | . | . |
| .         | .            | .                  | .                  | .                  | . | . | . |
| Vv14g0477 | Tc04_g027300 | .                  | Gorai.013G116200.1 | .                  | . | . | . |
| .         | .            | .                  | .                  | .                  | . | . | . |
| Vv14g0478 | .            | .                  | .                  | Gorai.007G132000.1 | . | . | . |
| .         | .            | .                  | .                  | .                  | . | . | . |
| Vv14g0479 | .            | .                  | .                  | .                  | . | . | . |
| .         | .            | .                  | .                  | .                  | . | . | . |
| Vv14g0480 | .            | Gorai.013G116700.1 | .                  | .                  | . | . | . |
| .         | .            | .                  | .                  | .                  | . | . | . |
| Vv14g0481 | .            | .                  | .                  | .                  | . | . | . |
| .         | .            | .                  | .                  | .                  | . | . | . |
| Vv14g0482 | .            | .                  | .                  | .                  | . | . | . |
| Vv07g0294 | Tc01_g029560 | .                  | .                  | .                  | . | . | . |
| .         | .            | .                  | .                  | .                  | . | . | . |
| Vv14g0483 | .            | .                  | .                  | .                  | . | . | . |
| .         | .            | .                  | .                  | .                  | . | . | . |
| Vv14g0484 | .            | .                  | Gorai.007G264500.1 | .                  | . | . | . |
| .         | .            | .                  | .                  | .                  | . | . | . |
| Vv14g0485 | .            | .                  | .                  | .                  | . | . | . |
| .         | .            | .                  | .                  | .                  | . | . | . |
| Vv14g0486 | .            | .                  | Gorai.007G264400.1 | .                  | . | . | . |
| .         | .            | .                  | .                  | .                  | . | . | . |
| Vv14g0487 | .            | .                  | .                  | .                  | . | . | . |
| .         | .            | .                  | .                  | .                  | . | . | . |
| Vv14g0488 | .            | .                  | .                  | .                  | . | . | . |
| .         | .            | .                  | .                  | .                  | . | . | . |
| Vv14g0489 | .            | .                  | .                  | .                  | . | . | . |
| .         | .            | .                  | .                  | .                  | . | . | . |
| Vv14g0490 | Tc04_g027340 | .                  | Gorai.007G264300.1 | .                  | . | . | . |

|           |              |                    |                    |
|-----------|--------------|--------------------|--------------------|
| Vv14g0491 |              | Gorai.007G264200.1 |                    |
| Vv14g0492 |              |                    |                    |
| Vv14g0493 |              |                    |                    |
| Vv14g0494 |              |                    |                    |
| Vv14g0495 |              | Gorai.007G263800.1 |                    |
| Vv14g0496 |              |                    |                    |
| Vv14g0497 |              |                    |                    |
| Vv14g0498 |              |                    |                    |
| Vv14g0499 |              |                    |                    |
| Vv14g0500 |              | Gorai.013G116800.1 | Gorai.007G261000.1 |
| Vv14g0501 | Tc05_g030670 |                    |                    |
| Vv14g0502 | Tc05_g030680 |                    |                    |
| Vv14g0503 |              |                    |                    |
| Vv14g0504 |              |                    |                    |
| Vv14g0505 |              |                    |                    |
| Vv14g0506 | Tc05_g030690 |                    |                    |

|           |              |   |   |   |   |   |   |
|-----------|--------------|---|---|---|---|---|---|
| Vv14g0507 | .            | . | . | . | . | . | . |
| .         | .            | . | . | . | . | . | . |
| Vv14g0508 | .            | . | . | . | . | . | . |
| .         | .            | . | . | . | . | . | . |
| Vv14g0509 | .            | . | . | . | . | . | . |
| .         | .            | . | . | . | . | . | . |
| Vv14g0510 | .            | . | . | . | . | . | . |
| .         | .            | . | . | . | . | . | . |
| Vv14g0511 | .            | . | . | . | . | . | . |
| .         | .            | . | . | . | . | . | . |
| Vv14g0512 | .            | . | . | . | . | . | . |
| .         | .            | . | . | . | . | . | . |
| Vv14g0513 | Tc05_g030700 | . | . | . | . | . | . |
| .         | .            | . | . | . | . | . | . |
| Vv14g0514 | .            | . | . | . | . | . | . |
| .         | .            | . | . | . | . | . | . |
| Vv14g0515 | .            | . | . | . | . | . | . |
| .         | .            | . | . | . | . | . | . |
| Vv14g0516 | .            | . | . | . | . | . | . |
| .         | .            | . | . | . | . | . | . |
| Vv14g0517 | .            | . | . | . | . | . | . |
| .         | .            | . | . | . | . | . | . |
| Vv14g0518 | .            | . | . | . | . | . | . |
| .         | .            | . | . | . | . | . | . |
| Vv14g0519 | .            | . | . | . | . | . | . |
| .         | .            | . | . | . | . | . | . |
| Vv14g0520 | .            | . | . | . | . | . | . |
| .         | .            | . | . | . | . | . | . |
| Vv14g0521 | .            | . | . | . | . | . | . |
| .         | .            | . | . | . | . | . | . |
| Vv14g0522 | .            | . | . | . | . | . | . |
| .         | .            | . | . | . | . | . | . |
| Vv14g0523 | Tc05_g030740 | . | . | . | . | . | . |

|                    |                    |                    |                    |                    |                    |   |   |
|--------------------|--------------------|--------------------|--------------------|--------------------|--------------------|---|---|
| .                  | .                  | .                  | .                  | .                  | .                  | . | . |
| .                  | .                  | .                  | .                  | .                  | .                  | . | . |
| Vv14g0524          | .                  | .                  | .                  | .                  | .                  | . | . |
| .                  | .                  | .                  | .                  | .                  | .                  | . | . |
| Vv14g0525          | .                  | .                  | .                  | .                  | .                  | . | . |
| .                  | .                  | .                  | .                  | .                  | .                  | . | . |
| Vv14g0526          | .                  | .                  | .                  | .                  | .                  | . | . |
| .                  | .                  | .                  | .                  | .                  | .                  | . | . |
| Vv14g0527          | Tc04_g004860       | .                  | .                  | .                  | Gorai.007G131300.1 | . | . |
| .                  | .                  | .                  | .                  | .                  | .                  | . | . |
| Vv14g0528          | .                  | Gorai.013G122800.1 | .                  | .                  | Gorai.             | . | . |
| 013G202700.1       | .                  | .                  | .                  | .                  | .                  | . | . |
| .                  | .                  | .                  | .                  | .                  | .                  | . | . |
| Vv14g0529          | Tc04_g027460       | .                  | .                  | .                  | Gorai.             | . | . |
| 011G185800.1       | .                  | .                  | .                  | .                  | .                  | . | . |
| Vv14g0530          | .                  | .                  | Gorai.007G287100.1 | .                  | Gorai.             | . | . |
| 007G129000.1       | .                  | .                  | .                  | .                  | .                  | . | . |
| .                  | .                  | .                  | .                  | .                  | .                  | . | . |
| Vv14g0531          | Tc04_g023370       | .                  | .                  | .                  | .                  | . | . |
| .                  | .                  | .                  | .                  | .                  | .                  | . | . |
| Vv14g0532          | Tc04_g027500       | .                  | .                  | Gorai.007G287000.1 | .                  | . | . |
| Gorai.013G202400.1 | .                  | .                  | .                  | .                  | .                  | . | . |
| .                  | .                  | .                  | .                  | .                  | .                  | . | . |
| Vv14g0533          | .                  | .                  | .                  | .                  | .                  | . | . |
| .                  | .                  | .                  | .                  | .                  | .                  | . | . |
| Vv14g0534          | .                  | .                  | .                  | .                  | .                  | . | . |
| .                  | .                  | .                  | .                  | .                  | .                  | . | . |
| Vv14g0535          | Tc04_g004760       | .                  | .                  | .                  | .                  | . | . |
| .                  | .                  | .                  | .                  | .                  | .                  | . | . |
| Vv14g0536          | .                  | .                  | .                  | .                  | .                  | . | . |
| .                  | .                  | .                  | .                  | .                  | .                  | . | . |
| Vv14g0537          | Tc04_g021290       | Gorai.013G122600.1 | .                  | Gorai.             | .                  | . | . |
| 007G286900.1       | Gorai.013G202200.1 | Gorai.011G159400.1 | .                  | .                  | .                  | . | . |
| .                  | .                  | .                  | .                  | .                  | .                  | . | . |
| Vv14g0538          | .                  | .                  | .                  | .                  | .                  | . | . |
| .                  | .                  | .                  | .                  | .                  | .                  | . | . |

|                    |              |                    |                    |                    |   |
|--------------------|--------------|--------------------|--------------------|--------------------|---|
| Vv14g0539          | Tc05_g030820 | .                  | .                  | .                  | . |
| .                  | .            | .                  | .                  | .                  | . |
| Vv14g0540          | .            | .                  | Gorai.007G286600.1 | .                  | . |
| .                  | .            | .                  | .                  | .                  | . |
| Vv14g0541          | .            | .                  | .                  | .                  | . |
| .                  | .            | .                  | .                  | .                  | . |
| Vv14g0542          | .            | .                  | .                  | .                  | . |
| .                  | .            | .                  | .                  | .                  | . |
| Vv14g0543          | .            | Gorai.013G122400.1 | .                  | Gorai.007G286500.1 | . |
| .                  | .            | .                  | .                  | .                  | . |
| .                  | .            | .                  | .                  | .                  | . |
| Vv14g0544          | .            | .                  | .                  | .                  | . |
| .                  | .            | .                  | .                  | .                  | . |
| Vv14g0545          | .            | Gorai.013G122300.1 | .                  | .                  | . |
| .                  | .            | .                  | .                  | .                  | . |
| Vv14g0546          | Tc04_g021720 | .                  | .                  | .                  | . |
| .                  | .            | .                  | .                  | .                  | . |
| Vv14g0547          | .            | .                  | Gorai.007G286100.1 | .                  | . |
| .                  | .            | .                  | .                  | .                  | . |
| Vv14g0548          | .            | .                  | .                  | Gorai.007G344500.1 | . |
| .                  | .            | .                  | .                  | .                  | . |
| Vv14g0549          | .            | .                  | .                  | .                  | . |
| .                  | .            | .                  | .                  | .                  | . |
| Vv14g0550          | .            | Gorai.013G122200.1 | .                  | .                  | . |
| Gorai.007G344600.1 | .            | .                  | .                  | .                  | . |
| .                  | .            | .                  | .                  | .                  | . |
| Vv14g0551          | Tc04_g023790 | .                  | .                  | Gorai.013G202100.1 | . |
| .                  | .            | .                  | .                  | .                  | . |
| Vv14g0552          | .            | .                  | .                  | .                  | . |
| .                  | .            | .                  | .                  | .                  | . |
| Vv14g0553          | .            | Gorai.013G122000.1 | .                  | .                  | . |
| .                  | .            | .                  | .                  | .                  | . |
| Vv14g0554          | .            | .                  | Gorai.013G202000.1 | .                  | . |
| .                  | .            | .                  | .                  | .                  | . |

|           |   |                    |                    |                    |   |
|-----------|---|--------------------|--------------------|--------------------|---|
| Vv14g0555 | . | .                  | Gorai.007G286000.1 | .                  | . |
| .         | . | .                  | .                  | .                  | . |
| Vv14g0556 | . | .                  | .                  | .                  | . |
| .         | . | .                  | .                  | .                  | . |
| Vv14g0557 | . | .                  | .                  | .                  | . |
| .         | . | .                  | .                  | .                  | . |
| Vv14g0558 | . | .                  | .                  | .                  | . |
| .         | . | .                  | .                  | .                  | . |
| Vv14g0559 | . | .                  | .                  | .                  | . |
| .         | . | .                  | .                  | .                  | . |
| Vv14g0560 | . | .                  | .                  | .                  | . |
| .         | . | .                  | .                  | .                  | . |
| Vv14g0561 | . | .                  | .                  | .                  | . |
| .         | . | .                  | .                  | .                  | . |
| Vv14g0562 | . | .                  | .                  | .                  | . |
| .         | . | .                  | .                  | .                  | . |
| Vv14g0563 | . | .                  | .                  | .                  | . |
| .         | . | .                  | .                  | .                  | . |
| Vv14g0564 | . | .                  | .                  | .                  | . |
| .         | . | .                  | .                  | .                  | . |
| Vv14g0565 | . | .                  | .                  | .                  | . |
| .         | . | .                  | .                  | .                  | . |
| Vv14g0566 | . | .                  | .                  | .                  | . |
| .         | . | .                  | .                  | .                  | . |
| Vv14g0567 | . | .                  | .                  | .                  | . |
| .         | . | .                  | .                  | .                  | . |
| Vv14g0568 | . | .                  | .                  | .                  | . |
| .         | . | .                  | .                  | .                  | . |
| Vv14g0569 | . | .                  | .                  | .                  | . |
| .         | . | .                  | .                  | .                  | . |
| Vv14g0570 | . | Gorai.013G121900.1 | .                  | Gorai.007G285900.1 | . |
| .         | . | .                  | .                  | .                  | . |
| .         | . | .                  | .                  | .                  | . |
| .         | . | .                  | .                  | .                  | . |

|                    |              |                    |                    |                    |   |   |   |
|--------------------|--------------|--------------------|--------------------|--------------------|---|---|---|
| Vv14g0571          | .            | .                  | .                  | .                  | . | . | . |
| .                  | .            | .                  | .                  | .                  | . | . | . |
| Vv14g0572          | .            | Gorai.013G121800.1 | .                  | Gorai.007G285700.1 | . | . | . |
| .                  | .            | .                  | .                  | .                  | . | . | . |
| .                  | .            | .                  | .                  | .                  | . | . | . |
| Vv14g0573          | .            | .                  | Gorai.007G285600.1 | .                  | . | . | . |
| .                  | .            | .                  | .                  | .                  | . | . | . |
| Vv14g0574          | .            | Gorai.013G121400.1 | .                  | Gorai.007G285500.1 | . | . | . |
| Gorai.013G201800.1 | .            | .                  | .                  | .                  | . | . | . |
| .                  | .            | .                  | .                  | .                  | . | . | . |
| Vv14g0575          | .            | .                  | .                  | .                  | . | . | . |
| .                  | .            | .                  | .                  | .                  | . | . | . |
| Vv14g0576          | .            | .                  | .                  | .                  | . | . | . |
| .                  | .            | .                  | .                  | .                  | . | . | . |
| Vv14g0577          | .            | .                  | Gorai.007G285400.1 | .                  | . | . | . |
| Gorai.007G344700.1 | .            | .                  | .                  | .                  | . | . | . |
| .                  | .            | .                  | .                  | .                  | . | . | . |
| Vv14g0578          | Tc04_g024160 | .                  | .                  | .                  | . | . | . |
| .                  | .            | .                  | .                  | .                  | . | . | . |
| Vv14g0579          | .            | .                  | .                  | .                  | . | . | . |
| .                  | .            | .                  | .                  | .                  | . | . | . |
| Vv14g0580          | .            | .                  | .                  | .                  | . | . | . |
| .                  | .            | .                  | .                  | .                  | . | . | . |
| Vv14g0581          | .            | .                  | .                  | .                  | . | . | . |
| .                  | .            | .                  | .                  | .                  | . | . | . |
| Vv14g0582          | .            | .                  | .                  | .                  | . | . | . |
| .                  | .            | .                  | .                  | .                  | . | . | . |
| Vv14g0583          | .            | .                  | .                  | .                  | . | . | . |
| .                  | .            | .                  | .                  | .                  | . | . | . |
| Vv14g0584          | .            | .                  | .                  | .                  | . | . | . |
| .                  | .            | .                  | .                  | .                  | . | . | . |
| Vv14g0585          | .            | .                  | Gorai.007G285000.1 | .                  | . | . | . |
| .                  | .            | .                  | .                  | .                  | . | . | . |
| .                  | .            | .                  | .                  | .                  | . | . | . |
| Vv14g0586          | .            | .                  | Gorai.007G284900.1 | Gorai.             | . | . | . |
| 013G201600.1       | .            | .                  | .                  | .                  | . | . | . |

|                    |                    |                    |                    |                    |   |   |   |
|--------------------|--------------------|--------------------|--------------------|--------------------|---|---|---|
| .                  | .                  | .                  | .                  | .                  | . | . | . |
| .                  | .                  | .                  | .                  | .                  | . | . | . |
| Vv14g0587          | .                  | .                  | .                  | .                  | . | . | . |
| .                  | .                  | .                  | .                  | .                  | . | . | . |
| Vv14g0588          | .                  | .                  | .                  | .                  | . | . | . |
| .                  | .                  | .                  | .                  | .                  | . | . | . |
| Vv14g0589          | Tc05_g008440       | .                  | .                  | Gorai.007G284600.1 | . | . | . |
| Gorai.007G137800.1 | Gorai.007G344900.1 | .                  | .                  | .                  | . | . | . |
| .                  | .                  | .                  | .                  | .                  | . | . | . |
| Vv14g0590          | .                  | .                  | .                  | .                  | . | . | . |
| .                  | .                  | .                  | .                  | .                  | . | . | . |
| Vv14g0591          | .                  | .                  | Gorai.007G284500.1 | .                  | . | . | . |
| .                  | .                  | .                  | .                  | .                  | . | . | . |
| Vv14g0592          | Tc04_g024170       | Gorai.013G121300.1 | .                  | Gorai.             | . | . | . |
| 007G284200.1       | .                  | .                  | Vv05g0595          | .                  | . | . | . |
| Tc04_g024170       | Gorai.005G044800.1 | .                  | .                  | .                  | . | . | . |
| .                  | .                  | .                  | .                  | .                  | . | . | . |
| Vv14g0593          | .                  | .                  | .                  | .                  | . | . | . |
| .                  | .                  | .                  | .                  | .                  | . | . | . |
| Vv14g0594          | .                  | .                  | .                  | .                  | . | . | . |
| .                  | .                  | .                  | .                  | .                  | . | . | . |
| Vv14g0595          | Tc04_g024190       | .                  | .                  | Gorai.             | . | . | . |
| 011G167500.1       | .                  | .                  | .                  | .                  | . | . | . |
| .                  | .                  | .                  | .                  | .                  | . | . | . |
| Vv14g0596          | .                  | .                  | Gorai.007G284100.1 | .                  | . | . | . |
| .                  | .                  | .                  | .                  | .                  | . | . | . |
| Vv14g0597          | .                  | .                  | .                  | .                  | . | . | . |
| .                  | .                  | .                  | .                  | .                  | . | . | . |
| Vv14g0598          | .                  | .                  | Gorai.007G284000.1 | .                  | . | . | . |
| .                  | .                  | .                  | .                  | .                  | . | . | . |
| Vv14g0599          | Tc05_g008470       | .                  | .                  | Gorai.007G283800.1 | . | . | . |
| .                  | .                  | .                  | .                  | .                  | . | . | . |
| Vv14g0600          | Tc04_g009660       | .                  | .                  | Gorai.             | . | . | . |
| 006G013500.1       | .                  | .                  | .                  | .                  | . | . | . |
| .                  | .                  | .                  | .                  | .                  | . | . | . |
| Vv14g0601          | Tc04_g024240       | .                  | .                  | Gorai.013G201400.1 | . | . | . |
| Gorai.011G167700.1 | .                  | .                  | Vv05g0603          | .                  | . | . | . |
| Tc04_g024240       | Gorai.006G241800.1 | .                  | .                  | Gorai.             | . | . | . |
| 011G167700.1       | .                  | .                  | .                  | .                  | . | . | . |



|                    |              |   |                    |        |   |
|--------------------|--------------|---|--------------------|--------|---|
| Vv14g0602          | .            | . | Gorai.007G283700.1 | .      | . |
| .                  | .            | . | .                  | .      | . |
| Vv14g0603          | .            | . | Gorai.007G283600.1 | Gorai. | . |
| 013G201200.1       | .            | . | .                  | .      | . |
| .                  | .            | . | .                  | .      | . |
| Vv14g0604          | .            | . | Gorai.007G283500.1 | .      | . |
| .                  | .            | . | .                  | .      | . |
| Vv14g0605          | .            | . | .                  | .      | . |
| .                  | .            | . | .                  | .      | . |
| Vv14g0606          | .            | . | .                  | .      | . |
| .                  | .            | . | .                  | .      | . |
| Vv14g0607          | .            | . | .                  | .      | . |
| .                  | .            | . | .                  | .      | . |
| Vv14g0608          | Tc04_g020550 | . | .                  | .      | . |
| .                  | .            | . | .                  | .      | . |
| Vv14g0609          | Tc04_g024380 | . | Gorai.007G283400.1 | .      | . |
| .                  | Vv01g0679    | . | Gorai.005G186700.1 | .      | . |
| .                  | .            | . | .                  | .      | . |
| Vv14g0610          | .            | . | .                  | .      | . |
| .                  | .            | . | .                  | .      | . |
| Vv14g0611          | Tc04_g024390 | . | Gorai.007G283200.1 | .      | . |
| .                  | Vv01g0678    | . | Gorai.005G186800.1 | .      | . |
| .                  | .            | . | .                  | .      | . |
| Vv14g0612          | .            | . | Gorai.007G283000.1 | .      | . |
| .                  | Vv01g0677    | . | Gorai.005G186900.1 | .      | . |
| .                  | .            | . | .                  | .      | . |
| Vv14g0613          | .            | . | .                  | .      | . |
| .                  | .            | . | .                  | .      | . |
| Vv14g0614          | Tc04_g024400 | . | Gorai.007G282900.1 | .      | . |
| .                  | Vv01g0676    | . | Gorai.002G170600.1 | .      | . |
| Gorai.005G187000.1 | .            | . | .                  | .      | . |
| Vv14g0615          | .            | . | .                  | .      | . |
| .                  | .            | . | .                  | .      | . |
| Vv14g0616          | .            | . | Gorai.007G282600.1 | .      | . |
| .                  | .            | . | .                  | .      | . |

|                    |              |                    |                    |        |
|--------------------|--------------|--------------------|--------------------|--------|
| Vv14g0617          | Tc04_g024410 | .                  | Gorai.007G282500.1 | .      |
| .                  | Vv01g0675    | .                  | .                  | .      |
| Vv14g0618          | .            | .                  | .                  | .      |
| .                  | .            | .                  | .                  | .      |
| Vv14g0619          | .            | .                  | .                  | .      |
| .                  | .            | .                  | .                  | .      |
| Vv14g0620          | .            | .                  | Gorai.007G282100.1 | .      |
| .                  | .            | .                  | .                  | .      |
| Vv01g0674          | .            | .                  | Gorai.002G170700.1 | Gorai. |
| 005G187000.1       | .            | .                  | .                  | .      |
| Vv14g0621          | .            | .                  | .                  | .      |
| .                  | .            | .                  | .                  | .      |
| Vv14g0622          | .            | Gorai.013G121000.1 | Gorai.007G282000.1 | .      |
| .                  | .            | Vv05g0619          | Tc04_g024410       | .      |
| Gorai.006G242800.1 | .            | Gorai.005G045500.1 | .                  | .      |
| Vv01g0672          | .            | .                  | Gorai.005G186900.1 | .      |
| Vv14g0623          | .            | .                  | .                  | .      |
| .                  | .            | .                  | .                  | .      |
| Vv14g0624          | .            | .                  | .                  | .      |
| .                  | .            | .                  | .                  | .      |
| Vv14g0625          | Tc05_g026700 | .                  | .                  | .      |
| .                  | .            | .                  | .                  | .      |
| Vv14g0626          | Tc05_g017380 | .                  | Gorai.007G279900.1 | .      |
| .                  | Vv05g0632    | .                  | .                  | .      |
| .                  | .            | .                  | .                  | .      |
| Vv14g0627          | .            | .                  | .                  | .      |
| Vv05g0641          | .            | Gorai.006G243500.1 | .                  | .      |
| .                  | .            | .                  | .                  | .      |
| Vv14g0628          | .            | .                  | .                  | .      |
| Vv05g0642          | .            | .                  | .                  | .      |
| .                  | .            | .                  | .                  | .      |
| Vv14g0629          | .            | .                  | .                  | .      |
| .                  | .            | .                  | .                  | .      |
| Vv14g0630          | .            | .                  | .                  | .      |
| .                  | .            | .                  | .                  | .      |
| Vv14g0631          | .            | .                  | .                  | .      |
| .                  | .            | .                  | .                  | .      |

|           |              |                    |                    |                    |   |   |
|-----------|--------------|--------------------|--------------------|--------------------|---|---|
| Vv14g0632 | Tc05_g017900 | .                  | .                  | .                  | . | . |
| .         | .            | .                  | .                  | .                  | . | . |
| Vv14g0633 | Tc04_g009190 | .                  | .                  | Gorai.007G140300.1 | . | . |
| .         | .            | .                  | .                  | .                  | . | . |
| Vv14g0634 | .            | .                  | Gorai.007G140600.1 | .                  | . | . |
| .         | .            | .                  | .                  | .                  | . | . |
| Vv14g0635 | .            | Gorai.013G120900.1 | .                  | .                  | . | . |
| .         | .            | .                  | .                  | .                  | . | . |
| Vv14g0636 | Tc04_g020510 | Gorai.013G120800.1 | .                  | .                  | . | . |
| .         | .            | Vv05g0663          | .                  | .                  | . | . |
| .         | .            | .                  | .                  | .                  | . | . |
| Vv14g0637 | .            | .                  | .                  | .                  | . | . |
| .         | .            | .                  | .                  | .                  | . | . |
| Vv14g0638 | .            | .                  | .                  | .                  | . | . |
| .         | .            | .                  | .                  | .                  | . | . |
| Vv14g0639 | Tc04_g008940 | .                  | .                  | .                  | . | . |
| .         | .            | .                  | .                  | .                  | . | . |
| Vv14g0640 | .            | .                  | .                  | .                  | . | . |
| .         | .            | .                  | .                  | .                  | . | . |
| Vv14g0641 | .            | .                  | .                  | .                  | . | . |
| .         | .            | .                  | .                  | .                  | . | . |
| Vv14g0642 | .            | .                  | Gorai.007G141500.1 | .                  | . | . |
| .         | .            | .                  | .                  | .                  | . | . |
| Vv14g0643 | Tc04_g020330 | .                  | .                  | .                  | . | . |
| .         | .            | .                  | .                  | .                  | . | . |
| Vv14g0644 | .            | .                  | Gorai.013G200900.1 | .                  | . | . |
| .         | .            | .                  | .                  | .                  | . | . |
| Vv14g0645 | Tc05_g018100 | .                  | .                  | Gorai.007G141800.1 | . | . |
| .         | .            | .                  | .                  | .                  | . | . |
| Vv14g0646 | .            | .                  | .                  | .                  | . | . |
| .         | .            | .                  | .                  | .                  | . | . |
| Vv14g0647 | Tc05_g027190 | .                  | .                  | .                  | . | . |
| .         | .            | .                  | .                  | .                  | . | . |
| .         | .            | .                  | .                  | .                  | . | . |

|              |                    |   |              |                    |   |   |
|--------------|--------------------|---|--------------|--------------------|---|---|
| Vv14g0648    | Tc04_g023370       | . | .            | .                  | . | . |
| .            | .                  | . | .            | .                  | . | . |
| Vv14g0649    | Tc05_g027370       | . | .            | .                  | . | . |
| .            | .                  | . | .            | .                  | . | . |
| Vv14g0650    | .                  | . | .            | .                  | . | . |
| .            | .                  | . | .            | .                  | . | . |
| Vv14g0651    | Tc04_g024590       | . | .            | Gorai.007G141900.1 | . | . |
| .            | Vv05g0679          | . | Tc04_g024590 | Gorai.             | . | . |
| 006G245900.1 | Gorai.005G046400.1 | . | .            | .                  | . | . |
| .            | .                  | . | .            | .                  | . | . |
| Vv14g0652    | .                  | . | .            | .                  | . | . |
| .            | .                  | . | .            | .                  | . | . |
| Vv14g0653    | .                  | . | .            | .                  | . | . |
| .            | .                  | . | .            | .                  | . | . |
| Vv14g0654    | .                  | . | .            | .                  | . | . |
| .            | .                  | . | .            | .                  | . | . |
| Vv14g0655    | .                  | . | .            | .                  | . | . |
| .            | .                  | . | .            | .                  | . | . |
| Vv14g0656    | .                  | . | .            | .                  | . | . |
| .            | .                  | . | .            | .                  | . | . |
| Vv14g0657    | .                  | . | .            | .                  | . | . |
| .            | .                  | . | .            | .                  | . | . |
| Vv14g0658    | .                  | . | .            | .                  | . | . |
| Vv01g0664    | .                  | . | .            | .                  | . | . |
| .            | .                  | . | .            | .                  | . | . |
| Vv14g0659    | .                  | . | .            | .                  | . | . |
| .            | .                  | . | .            | .                  | . | . |
| Vv14g0660    | .                  | . | .            | .                  | . | . |
| .            | .                  | . | .            | .                  | . | . |
| Vv14g0661    | Tc04_g024710       | . | .            | .                  | . | . |
| .            | .                  | . | .            | .                  | . | . |
| Vv14g0662    | .                  | . | .            | .                  | . | . |
| .            | .                  | . | .            | .                  | . | . |
| Vv14g0663    | .                  | . | .            | .                  | . | . |
| .            | .                  | . | .            | .                  | . | . |
| Vv14g0664    | .                  | . | .            | .                  | . | . |

|           |              |  |  |  |  |  |
|-----------|--------------|--|--|--|--|--|
| Vv14g0665 | Tc04_g024840 |  |  |  |  |  |
| Vv14g0666 | Tc04_g023010 |  |  |  |  |  |
| Vv14g0667 |              |  |  |  |  |  |
| Vv14g0668 |              |  |  |  |  |  |
| Vv14g0669 |              |  |  |  |  |  |
| Vv14g0670 |              |  |  |  |  |  |
| Vv14g0671 |              |  |  |  |  |  |
| Vv14g0672 |              |  |  |  |  |  |
| Vv14g0673 |              |  |  |  |  |  |
| Vv14g0674 |              |  |  |  |  |  |
| Vv14g0675 |              |  |  |  |  |  |
| Vv14g0676 |              |  |  |  |  |  |
| Vv14g0677 |              |  |  |  |  |  |
| Vv14g0678 |              |  |  |  |  |  |
| Vv14g0679 |              |  |  |  |  |  |
| Vv14g0680 |              |  |  |  |  |  |

|           |              |   |   |   |   |   |
|-----------|--------------|---|---|---|---|---|
| Vv14g0681 | Tc04_g022630 | . | . | . | . | . |
| .         | .            | . | . | . | . | . |
| Vv14g0682 | .            | . | . | . | . | . |
| .         | .            | . | . | . | . | . |
| Vv14g0683 | .            | . | . | . | . | . |
| .         | .            | . | . | . | . | . |
| Vv14g0684 | .            | . | . | . | . | . |
| .         | .            | . | . | . | . | . |
| Vv14g0685 | .            | . | . | . | . | . |
| .         | .            | . | . | . | . | . |
| Vv14g0686 | .            | . | . | . | . | . |
| .         | .            | . | . | . | . | . |
| Vv14g0687 | .            | . | . | . | . | . |
| .         | .            | . | . | . | . | . |
| Vv14g0688 | .            | . | . | . | . | . |
| .         | .            | . | . | . | . | . |
| Vv14g0689 | .            | . | . | . | . | . |
| .         | .            | . | . | . | . | . |
| Vv14g0690 | .            | . | . | . | . | . |
| .         | .            | . | . | . | . | . |
| Vv14g0691 | .            | . | . | . | . | . |
| .         | .            | . | . | . | . | . |
| Vv14g0692 | .            | . | . | . | . | . |
| .         | .            | . | . | . | . | . |
| Vv14g0693 | .            | . | . | . | . | . |
| .         | .            | . | . | . | . | . |
| Vv14g0694 | .            | . | . | . | . | . |
| .         | .            | . | . | . | . | . |
| Vv14g0695 | .            | . | . | . | . | . |
| .         | .            | . | . | . | . | . |
| Vv14g0696 | .            | . | . | . | . | . |
| .         | .            | . | . | . | . | . |
| Vv14g0697 | .            | . | . | . | . | . |
| .         | .            | . | . | . | . | . |

|           |              |   |   |   |   |   |   |
|-----------|--------------|---|---|---|---|---|---|
| Vv14g0698 | .            | . | . | . | . | . | . |
| .         | .            | . | . | . | . | . | . |
| Vv14g0699 | .            | . | . | . | . | . | . |
| .         | .            | . | . | . | . | . | . |
| Vv14g0700 | .            | . | . | . | . | . | . |
| .         | .            | . | . | . | . | . | . |
| Vv14g0701 | .            | . | . | . | . | . | . |
| .         | .            | . | . | . | . | . | . |
| Vv14g0702 | .            | . | . | . | . | . | . |
| .         | .            | . | . | . | . | . | . |
| Vv14g0703 | .            | . | . | . | . | . | . |
| .         | .            | . | . | . | . | . | . |
| Vv14g0704 | .            | . | . | . | . | . | . |
| .         | .            | . | . | . | . | . | . |
| Vv14g0705 | .            | . | . | . | . | . | . |
| .         | .            | . | . | . | . | . | . |
| Vv14g0706 | .            | . | . | . | . | . | . |
| .         | .            | . | . | . | . | . | . |
| Vv14g0707 | .            | . | . | . | . | . | . |
| .         | .            | . | . | . | . | . | . |
| Vv14g0708 | Tc04_g029300 | . | . | . | . | . | . |
| .         | .            | . | . | . | . | . | . |
| Vv14g0709 | .            | . | . | . | . | . | . |
| .         | .            | . | . | . | . | . | . |
| Vv14g0710 | .            | . | . | . | . | . | . |
| .         | .            | . | . | . | . | . | . |
| Vv14g0711 | .            | . | . | . | . | . | . |
| .         | .            | . | . | . | . | . | . |
| Vv14g0712 | .            | . | . | . | . | . | . |
| .         | .            | . | . | . | . | . | . |
| Vv14g0713 | .            | . | . | . | . | . | . |
| .         | .            | . | . | . | . | . | . |
| Vv14g0714 | .            | . | . | . | . | . | . |

|           |              |   |   |   |   |   |   |
|-----------|--------------|---|---|---|---|---|---|
| .         | .            | . | . | . | . | . | . |
| Vv14g0715 | .            | . | . | . | . | . | . |
| Vv14g0716 | .            | . | . | . | . | . | . |
| Vv14g0717 | .            | . | . | . | . | . | . |
| Vv14g0718 | Tc04_g029380 | . | . | . | . | . | . |
| Vv14g0719 | .            | . | . | . | . | . | . |
| Vv14g0720 | .            | . | . | . | . | . | . |
| Vv14g0721 | .            | . | . | . | . | . | . |
| Vv14g0722 | .            | . | . | . | . | . | . |
| Vv14g0723 | .            | . | . | . | . | . | . |
| Vv14g0724 | .            | . | . | . | . | . | . |
| Vv14g0725 | .            | . | . | . | . | . | . |
| Vv14g0726 | .            | . | . | . | . | . | . |
| Vv14g0727 | .            | . | . | . | . | . | . |
| Vv14g0728 | .            | . | . | . | . | . | . |
| Vv14g0729 | .            | . | . | . | . | . | . |
| Vv14g0730 | .            | . | . | . | . | . | . |
| .         | .            | . | . | . | . | . | . |



|           |              |                    |                    |                    |   |   |   |
|-----------|--------------|--------------------|--------------------|--------------------|---|---|---|
| Vv14g0731 | .            | .                  | .                  | .                  | . | . | . |
| .         | .            | .                  | .                  | .                  | . | . | . |
| .         | .            | .                  | .                  | .                  | . | . | . |
| Vv14g0732 | .            | .                  | .                  | .                  | . | . | . |
| Vv01g0427 | .            | .                  | Gorai.005G193700.1 | .                  | . | . | . |
| .         | .            | .                  | .                  | .                  | . | . | . |
| Vv14g0733 | .            | .                  | .                  | .                  | . | . | . |
| .         | .            | .                  | .                  | .                  | . | . | . |
| .         | .            | .                  | .                  | .                  | . | . | . |
| Vv14g0734 | .            | .                  | .                  | .                  | . | . | . |
| .         | .            | .                  | .                  | .                  | . | . | . |
| .         | .            | .                  | .                  | .                  | . | . | . |
| Vv14g0735 | .            | .                  | .                  | .                  | . | . | . |
| .         | .            | .                  | .                  | .                  | . | . | . |
| .         | .            | .                  | .                  | .                  | . | . | . |
| Vv14g0736 | Tc04_g013830 | .                  | .                  | .                  | . | . | . |
| Vv17g0322 | .            | Gorai.001G084000.1 | .                  | .                  | . | . | . |
| .         | Vv01g0421    | .                  | .                  | .                  | . | . | . |
| .         | .            | .                  | .                  | .                  | . | . | . |
| Vv14g0737 | .            | .                  | .                  | .                  | . | . | . |
| .         | .            | .                  | .                  | .                  | . | . | . |
| .         | .            | .                  | .                  | .                  | . | . | . |
| Vv14g0738 | .            | .                  | .                  | .                  | . | . | . |
| .         | .            | .                  | .                  | .                  | . | . | . |
| .         | .            | .                  | .                  | .                  | . | . | . |
| Vv14g0739 | .            | .                  | .                  | .                  | . | . | . |
| .         | .            | .                  | .                  | .                  | . | . | . |
| .         | .            | .                  | .                  | .                  | . | . | . |
| Vv14g0740 | Tc04_g013880 | .                  | .                  | Gorai.007G184400.1 | . | . | . |
| .         | .            | .                  | .                  | .                  | . | . | . |
| .         | .            | .                  | .                  | .                  | . | . | . |
| Vv14g0741 | .            | .                  | .                  | .                  | . | . | . |
| .         | .            | .                  | .                  | .                  | . | . | . |
| .         | .            | .                  | .                  | .                  | . | . | . |
| Vv14g0742 | .            | .                  | .                  | .                  | . | . | . |
| .         | .            | .                  | .                  | .                  | . | . | . |
| .         | .            | .                  | .                  | .                  | . | . | . |
| Vv14g0743 | .            | .                  | .                  | .                  | . | . | . |
| .         | .            | .                  | .                  | .                  | . | . | . |
| .         | .            | .                  | .                  | .                  | . | . | . |
| Vv14g0744 | Tc04_g013950 | .                  | .                  | .                  | . | . | . |
| .         | .            | .                  | .                  | .                  | . | . | . |
| .         | .            | .                  | .                  | .                  | . | . | . |
| Vv14g0745 | .            | .                  | .                  | .                  | . | . | . |
| .         | .            | .                  | .                  | .                  | . | . | . |
| .         | .            | .                  | .                  | .                  | . | . | . |
| Vv14g0746 | Tc04_g013970 | .                  | .                  | .                  | . | . | . |
| .         | .            | .                  | .                  | .                  | . | . | . |
| Vv01g0407 | .            | .                  | .                  | .                  | . | . | . |
| Vv14g0747 | .            | .                  | .                  | .                  | . | . | . |

|              |              |   |   |   |                    |   |   |
|--------------|--------------|---|---|---|--------------------|---|---|
| .            | .            | . | . | . | .                  | . | . |
| .            | .            | . | . | . | .                  | . | . |
| Vv14g0748    | .            | . | . | . | .                  | . | . |
| .            | .            | . | . | . | .                  | . | . |
| Vv14g0749    | Tc04_g029540 | . | . | . | .                  | . | . |
| .            | .            | . | . | . | .                  | . | . |
| Vv14g0750    | .            | . | . | . | .                  | . | . |
| .            | .            | . | . | . | .                  | . | . |
| Vv14g0751    | Tc04_g014300 | . | . | . | Gorai.007G183400.1 | . | . |
| .            | .            | . | . | . | .                  | . | . |
| Vv14g0752    | .            | . | . | . | .                  | . | . |
| .            | .            | . | . | . | .                  | . | . |
| Vv14g0753    | .            | . | . | . | .                  | . | . |
| .            | .            | . | . | . | .                  | . | . |
| Vv14g0754    | .            | . | . | . | .                  | . | . |
| .            | .            | . | . | . | .                  | . | . |
| Vv14g0755    | Tc04_g014320 | . | . | . | Gorai.007G182700.1 | . | . |
| .            | Vv17g0344    | . | . | . | Gorai.             | . | . |
| 006G059300.1 | .            | . | . | . | .                  | . | . |
| .            | .            | . | . | . | .                  | . | . |
| Vv14g0756    | Tc04_g014330 | . | . | . | Gorai.007G182500.1 | . | . |
| .            | .            | . | . | . | .                  | . | . |
| Vv14g0757    | .            | . | . | . | .                  | . | . |
| .            | .            | . | . | . | .                  | . | . |
| Vv14g0758    | Tc04_g014340 | . | . | . | Gorai.007G182400.1 | . | . |
| .            | .            | . | . | . | .                  | . | . |
| Vv14g0759    | Tc04_g014350 | . | . | . | .                  | . | . |
| .            | .            | . | . | . | .                  | . | . |
| Vv01g0389    | .            | . | . | . | .                  | . | . |
| Vv14g0760    | .            | . | . | . | .                  | . | . |
| .            | .            | . | . | . | .                  | . | . |
| Vv14g0761    | .            | . | . | . | .                  | . | . |
| .            | .            | . | . | . | .                  | . | . |
| Vv14g0762    | .            | . | . | . | .                  | . | . |
| .            | .            | . | . | . | .                  | . | . |
| Vv14g0763    | .            | . | . | . | .                  | . | . |
| .            | .            | . | . | . | .                  | . | . |

|                    |                    |   |           |                    |        |
|--------------------|--------------------|---|-----------|--------------------|--------|
| Vv14g0764          | Tc04_g014420       | . | .         | .                  | Gorai. |
| 011G228800.1       | Vv17g0349          | . | .         | .                  | Gorai. |
| 006G060000.1       | .                  | . | Vv01g0384 | .                  | .      |
| Gorai.005G192100.1 | Gorai.009G347900.1 | . | .         | .                  | .      |
| Gorai.012G124300.1 | .                  | . | .         | .                  | .      |
| Vv14g0765          | Tc04_g014430       | . | .         | Gorai.007G182300.1 | .      |
| .                  | .                  | . | .         | .                  | .      |
| Vv14g0766          | Tc04_g014440       | . | .         | Gorai.007G182200.1 | .      |
| .                  | .                  | . | .         | .                  | .      |
| Vv14g0767          | Tc04_g014560       | . | .         | .                  | .      |
| .                  | .                  | . | .         | .                  | .      |
| Vv01g0377          | Tc02_g009740       | . | .         | .                  | .      |
| Vv14g0768          | Tc04_g014570       | . | .         | .                  | .      |
| .                  | .                  | . | .         | .                  | .      |
| Vv14g0769          | .                  | . | .         | .                  | .      |
| .                  | .                  | . | .         | .                  | .      |
| Vv14g0770          | Tc04_g014590       | . | .         | Gorai.007G181900.1 | .      |
| .                  | .                  | . | .         | .                  | .      |
| Vv14g0771          | Tc04_g014610       | . | .         | .                  | .      |
| Vv17g0355          | Gorai.001G081000.1 | . | .         | .                  | .      |
| .                  | Vv01g0374          | . | .         | .                  | .      |
| Vv14g0772          | .                  | . | .         | .                  | .      |
| .                  | .                  | . | .         | .                  | .      |
| Vv14g0773          | .                  | . | .         | .                  | .      |
| .                  | .                  | . | .         | .                  | .      |
| Vv14g0774          | .                  | . | .         | .                  | .      |
| .                  | .                  | . | .         | .                  | .      |
| Vv14g0775          | .                  | . | .         | .                  | .      |
| .                  | .                  | . | .         | .                  | .      |
| Vv14g0776          | .                  | . | .         | .                  | .      |
| .                  | .                  | . | .         | .                  | .      |
| Vv14g0777          | Tc04_g014640       | . | .         | .                  | .      |
| Vv17g0361          | Gorai.006G060100.1 | . | .         | .                  | .      |
| .                  | .                  | . | .         | .                  | .      |
| Vv14g0778          | Tc04_g014660       | . | .         | .                  | .      |
| .                  | .                  | . | .         | .                  | .      |
| .                  | .                  | . | .         | .                  | .      |

|              |              |                    |        |                    |
|--------------|--------------|--------------------|--------|--------------------|
| Vv14g0779    | Tc04_g014670 | .                  | .      | Gorai.007G181800.1 |
| .            | .            | .                  | .      | .                  |
| .            | Vv01g0372    | .                  | .      | .                  |
| .            | .            | .                  | .      | .                  |
| Vv14g0780    | Tc04_g014680 | .                  | .      | .                  |
| Vv17g0362    | .            | Gorai.001G075100.1 | Gorai. | .                  |
| 006G060200.1 | .            | Gorai.006G194400.1 | .      | .                  |
| .            | .            | .                  | .      | .                  |
| Vv14g0781    | Tc04_g014710 | .                  | .      | Gorai.007G181600.1 |
| .            | .            | .                  | .      | .                  |
| .            | .            | .                  | .      | .                  |
| Vv14g0782    | Tc04_g014730 | .                  | .      | .                  |
| .            | .            | .                  | .      | .                  |
| .            | .            | .                  | .      | .                  |
| Vv14g0783    | .            | .                  | .      | .                  |
| .            | .            | .                  | .      | .                  |
| .            | .            | .                  | .      | .                  |
| Vv14g0784    | Tc04_g014740 | .                  | .      | .                  |
| .            | .            | .                  | .      | .                  |
| .            | .            | .                  | .      | .                  |
| Vv14g0785    | Tc04_g014750 | .                  | .      | .                  |
| .            | .            | .                  | .      | .                  |
| .            | .            | .                  | .      | .                  |
| Vv14g0786    | Tc04_g014760 | .                  | .      | .                  |
| .            | .            | .                  | .      | .                  |
| .            | .            | .                  | .      | .                  |
| Vv14g0787    | .            | .                  | .      | .                  |
| .            | .            | .                  | .      | .                  |
| .            | .            | .                  | .      | .                  |
| Vv14g0788    | Tc04_g014770 | .                  | .      | .                  |
| .            | .            | .                  | .      | .                  |
| Vv01g0357    | .            | Gorai.005G191800.1 | .      | .                  |
| .            | .            | .                  | .      | .                  |
| Vv14g0789    | .            | .                  | .      | .                  |
| .            | .            | .                  | .      | .                  |
| .            | .            | .                  | .      | .                  |
| Vv14g0790    | Tc04_g014790 | .                  | .      | Gorai.007G181500.1 |
| .            | Vv17g0383    | .                  | .      | .                  |
| .            | Vv01g0353    | .                  | Gorai. | .                  |
| 005G190600.1 | .            | .                  | .      | .                  |
| Vv14g0791    | .            | .                  | .      | .                  |
| .            | .            | .                  | .      | .                  |
| .            | .            | .                  | .      | .                  |
| Vv14g0792    | .            | .                  | .      | .                  |
| .            | .            | .                  | .      | .                  |
| .            | .            | .                  | .      | .                  |
| Vv14g0793    | .            | .                  | .      | .                  |
| .            | .            | .                  | .      | .                  |
| .            | .            | .                  | .      | .                  |
| Vv14g0794    | .            | .                  | .      | .                  |

|                    |                    |                    |   |                    |                    |           |   |
|--------------------|--------------------|--------------------|---|--------------------|--------------------|-----------|---|
| .                  | .                  | .                  | . | .                  | .                  | .         | . |
| .                  | .                  | .                  | . | .                  | .                  | .         | . |
| Vv14g0795          | Tc04_g014830       | .                  | . | .                  | .                  | .         | . |
| Vv17g0390          | .                  | .                  | . | Gorai.006G061200.1 | .                  | .         | . |
| .                  | Vv01g0351          | .                  | . | Tc02_g010100       | Gorai.             | .         | . |
| 002G217800.1       | Gorai.005G190300.1 | .                  | . | .                  | .                  | .         | . |
| Vv14g0796          | Tc04_g014850       | .                  | . | .                  | Gorai.007G181200.1 | .         | . |
| .                  | .                  | .                  | . | .                  | .                  | .         | . |
| Vv14g0797          | .                  | .                  | . | .                  | .                  | .         | . |
| .                  | .                  | .                  | . | .                  | .                  | .         | . |
| Vv14g0798          | Tc04_g014860       | .                  | . | .                  | Gorai.007G181100.1 | .         | . |
| Gorai.011G231100.1 | .                  | .                  | . | .                  | .                  | .         | . |
| .                  | .                  | .                  | . | .                  | .                  | .         | . |
| Vv14g0799          | .                  | .                  | . | .                  | .                  | .         | . |
| .                  | .                  | .                  | . | .                  | .                  | .         | . |
| Vv14g0800          | .                  | .                  | . | .                  | .                  | .         | . |
| .                  | .                  | .                  | . | .                  | .                  | .         | . |
| Vv14g0801          | .                  | .                  | . | .                  | .                  | .         | . |
| .                  | .                  | .                  | . | .                  | .                  | Vv01g0344 | . |
| .                  | Gorai.002G218500.1 | .                  | . | .                  | .                  | .         | . |
| Vv14g0802          | .                  | .                  | . | .                  | .                  | .         | . |
| .                  | .                  | .                  | . | .                  | .                  | .         | . |
| Vv14g0803          | Tc04_g014870       | .                  | . | .                  | .                  | .         | . |
| .                  | .                  | .                  | . | .                  | .                  | .         | . |
| Vv14g0804          | .                  | .                  | . | .                  | .                  | .         | . |
| .                  | .                  | .                  | . | .                  | .                  | .         | . |
| Vv14g0805          | .                  | .                  | . | .                  | .                  | .         | . |
| .                  | .                  | .                  | . | .                  | .                  | .         | . |
| Vv14g0806          | Tc04_g014900       | .                  | . | .                  | .                  | .         | . |
| .                  | .                  | .                  | . | .                  | .                  | .         | . |
| Vv01g0337          | Tc02_g034190       | Gorai.013G076800.1 | . | .                  | .                  | .         | . |
| .                  | .                  | .                  | . | .                  | .                  | .         | . |
| Vv14g0807          | .                  | .                  | . | .                  | .                  | .         | . |
| .                  | .                  | .                  | . | .                  | .                  | .         | . |
| Vv14g0808          | Tc04_g014920       | .                  | . | .                  | .                  | .         | . |
| .                  | .                  | .                  | . | .                  | .                  | .         | . |
| Vv01g0328          | Tc02_g034280       | Gorai.013G081600.1 | . | .                  | Gorai.             | .         | . |
| 005G138400.1       | .                  | .                  | . | .                  | .                  | .         | . |
| Vv14g0809          | .                  | .                  | . | .                  | .                  | .         | . |
| .                  | .                  | .                  | . | .                  | .                  | .         | . |

|                    |                    |              |                    |                    |   |
|--------------------|--------------------|--------------|--------------------|--------------------|---|
| Vv14g0810          | .                  | .            | .                  | Gorai.007G180900.1 | . |
|                    | Vv01g0325          | Tc02_g034310 | .                  | Gorai.005G138300.1 | . |
| Vv14g0811          | .                  | .            | .                  | .                  | . |
| Vv14g0812          | .                  | .            | .                  | .                  | . |
| Vv14g0813          | .                  | .            | .                  | .                  | . |
| Vv14g0814          | .                  | .            | .                  | .                  | . |
| Vv14g0815          | Tc04_g015090       | .            | .                  | .                  | . |
| Vv14g0816          | Tc04_g015100       | .            | .                  | .                  | . |
| Vv01g0321          | Tc02_g034360       | .            | .                  | Gorai.             | . |
| 008G184600.1       | .                  | .            | .                  | .                  | . |
| Vv14g0817          | .                  | .            | .                  | .                  | . |
| Vv17g0417          | .                  | .            | Gorai.006G062300.1 | .                  | . |
| Gorai.008G184700.1 | Gorai.006G195300.1 | .            | .                  | Vv01g0319          | . |
| Tc02_g034390       | .                  | .            | .                  | .                  | . |
| Vv14g0818          | .                  | .            | .                  | .                  | . |
| Vv14g0819          | Tc04_g015110       | .            | .                  | .                  | . |
| Vv14g0820          | Tc04_g015120       | .            | .                  | .                  | . |
| Vv14g0821          | Tc04_g015130       | .            | Gorai.001G201400.1 | .                  | . |
| Vv14g0822          | Tc04_g015140       | .            | .                  | Gorai.007G189000.1 | . |
| Vv14g0823          | Tc04_g015150       | .            | .                  | .                  | . |
| Vv14g0824          | Tc04_g015160       | .            | .                  | Gorai.007G180600.1 | . |
| Vv14g0825          | .                  | .            | .                  | .                  | . |

|              |              |   |   |   |                    |        |   |
|--------------|--------------|---|---|---|--------------------|--------|---|
| .            | .            | . | . | . | .                  | .      | . |
| .            | .            | . | . | . | .                  | .      | . |
| Vv14g0826    | .            | . | . | . | .                  | .      | . |
| .            | .            | . | . | . | .                  | .      | . |
| Vv14g0827    | .            | . | . | . | .                  | .      | . |
| .            | .            | . | . | . | .                  | .      | . |
| Vv14g0828    | Tc04_g023450 | . | . | . | .                  | .      | . |
| .            | .            | . | . | . | .                  | .      | . |
| Vv14g0829    | .            | . | . | . | .                  | .      | . |
| .            | .            | . | . | . | .                  | .      | . |
| Vv14g0830    | Tc04_g023430 | . | . | . | .                  | .      | . |
| .            | .            | . | . | . | .                  | .      | . |
| Vv14g0831    | Tc04_g023420 | . | . | . | .                  | .      | . |
| .            | .            | . | . | . | .                  | .      | . |
| Vv14g0832    | Tc04_g015170 | . | . | . | .                  | .      | . |
| Vv17g0428    | Tc03_g007010 | . | . | . | .                  | Gorai. | . |
| 007G003000.1 | .            | . | . | . | .                  | .      | . |
| .            | .            | . | . | . | .                  | .      | . |
| Vv14g0833    | Tc04_g015190 | . | . | . | Gorai.007G180300.1 | .      | . |
| .            | .            | . | . | . | .                  | .      | . |
| Vv14g0834    | .            | . | . | . | .                  | .      | . |
| .            | .            | . | . | . | .                  | .      | . |
| Vv14g0835    | .            | . | . | . | .                  | .      | . |
| .            | .            | . | . | . | .                  | .      | . |
| Vv14g0836    | .            | . | . | . | Gorai.007G179100.1 | .      | . |
| .            | .            | . | . | . | .                  | .      | . |
| Vv14g0837    | Tc04_g015210 | . | . | . | Gorai.007G176300.1 | .      | . |
| .            | .            | . | . | . | .                  | .      | . |
| Vv14g0838    | .            | . | . | . | .                  | .      | . |
| .            | .            | . | . | . | .                  | .      | . |
| Vv14g0839    | Tc04_g015230 | . | . | . | .                  | .      | . |
| .            | .            | . | . | . | .                  | .      | . |
| Vv14g0840    | Tc04_g015240 | . | . | . | .                  | .      | . |
| .            | .            | . | . | . | .                  | .      | . |
| Vv14g0841    | Tc04_g015260 | . | . | . | .                  | .      | . |
| .            | .            | . | . | . | .                  | .      | . |

|              |              |                    |   |   |        |
|--------------|--------------|--------------------|---|---|--------|
| Vv01g0294    | Tc02_g034590 | .                  | . | . | Gorai. |
| 008G186200.1 | .            | .                  | . | . | .      |
| Vv14g0842    | Tc04_g015290 | .                  | . | . | .      |
| .            | .            | .                  | . | . | .      |
| Vv01g0287    | Tc02_g034650 | .                  | . | . | Gorai. |
| 008G186800.1 | .            | .                  | . | . | .      |
| Vv14g0843    | .            | .                  | . | . | .      |
| .            | .            | .                  | . | . | .      |
| .            | .            | .                  | . | . | .      |
| Vv14g0844    | Tc04_g015300 | .                  | . | . | .      |
| .            | .            | .                  | . | . | .      |
| .            | .            | .                  | . | . | .      |
| Vv14g0845    | .            | .                  | . | . | .      |
| Vv17g0445    | .            | Gorai.006G063500.1 | . | . | .      |
| .            | .            | .                  | . | . | .      |
| Vv14g0846    | Tc04_g015310 | .                  | . | . | .      |
| Vv17g0446    | .            | .                  | . | . | .      |
| .            | .            | .                  | . | . | .      |
| Vv14g0847    | .            | .                  | . | . | .      |
| .            | .            | .                  | . | . | .      |
| .            | .            | .                  | . | . | .      |
| Vv14g0848    | Tc04_g015320 | .                  | . | . | .      |
| .            | .            | .                  | . | . | .      |
| Vv01g0280    | Tc02_g034710 | .                  | . | . | Gorai. |
| 008G187200.1 | .            | .                  | . | . | .      |
| Vv14g0849    | .            | .                  | . | . | .      |
| .            | .            | .                  | . | . | .      |
| .            | .            | .                  | . | . | .      |
| Vv14g0850    | .            | .                  | . | . | .      |
| .            | .            | .                  | . | . | .      |
| .            | .            | .                  | . | . | .      |
| Vv14g0851    | .            | .                  | . | . | .      |
| .            | .            | .                  | . | . | .      |
| .            | .            | .                  | . | . | .      |
| Vv14g0852    | Tc04_g015480 | .                  | . | . | .      |
| .            | .            | .                  | . | . | .      |
| Vv01g0273    | .            | .                  | . | . | .      |
| Vv14g0853    | .            | .                  | . | . | .      |
| .            | .            | .                  | . | . | .      |
| .            | .            | .                  | . | . | .      |
| Vv14g0854    | .            | .                  | . | . | .      |
| .            | .            | .                  | . | . | .      |
| .            | .            | .                  | . | . | .      |
| Vv14g0855    | .            | .                  | . | . | .      |
| .            | .            | .                  | . | . | .      |
| .            | .            | .                  | . | . | .      |
| Vv14g0856    | .            | .                  | . | . | .      |
| .            | .            | .                  | . | . | .      |
| .            | .            | .                  | . | . | .      |
| Vv14g0857    | .            | .                  | . | . | .      |



|                           |              |  |                    |  |        |  |
|---------------------------|--------------|--|--------------------|--|--------|--|
| Vv14g0858                 |              |  |                    |  |        |  |
| Vv14g0859                 |              |  | Gorai.001G203600.1 |  |        |  |
| Vv14g0860                 |              |  |                    |  |        |  |
| Vv14g0861                 |              |  |                    |  |        |  |
| Vv14g0862                 |              |  |                    |  |        |  |
| Vv14g0863                 |              |  |                    |  |        |  |
| Vv14g0864                 |              |  | Gorai.007G187100.1 |  |        |  |
| Vv14g0865<br>012G118800.1 | Tc05_g001710 |  |                    |  | Gorai. |  |
| Vv14g0866                 |              |  |                    |  |        |  |
| Vv14g0867                 | Tc05_g001700 |  |                    |  |        |  |
| Vv14g0868                 |              |  |                    |  |        |  |
| Vv14g0869                 |              |  |                    |  |        |  |
| Vv14g0870                 |              |  |                    |  |        |  |
| Vv14g0871                 |              |  |                    |  |        |  |
| Vv14g0872                 |              |  |                    |  |        |  |
| Vv14g0873                 |              |  |                    |  |        |  |

|                    |              |   |   |                    |   |   |
|--------------------|--------------|---|---|--------------------|---|---|
| Vv14g0874          | Tc04_g015580 | . | . | .                  | . | . |
| .                  | .            | . | . | .                  | . | . |
| Vv14g0875          | .            | . | . | .                  | . | . |
| .                  | .            | . | . | .                  | . | . |
| Vv14g0876          | .            | . | . | Gorai.007G186800.1 | . | . |
| .                  | .            | . | . | .                  | . | . |
| Vv14g0877          | .            | . | . | .                  | . | . |
| .                  | .            | . | . | .                  | . | . |
| Vv14g0878          | .            | . | . | .                  | . | . |
| Vv17g0482          | .            | . | . | .                  | . | . |
| .                  | .            | . | . | .                  | . | . |
| Vv14g0879          | Tc04_g015610 | . | . | Gorai.001G203800.1 | . | . |
| Gorai.007G186600.1 | .            | . | . | .                  | . | . |
| .                  | .            | . | . | .                  | . | . |
| Vv14g0880          | Tc04_g015620 | . | . | .                  | . | . |
| .                  | .            | . | . | .                  | . | . |
| Vv14g0881          | Tc04_g017870 | . | . | .                  | . | . |
| .                  | .            | . | . | .                  | . | . |
| Vv14g0882          | Tc04_g015630 | . | . | .                  | . | . |
| .                  | .            | . | . | .                  | . | . |
| Vv14g0883          | .            | . | . | .                  | . | . |
| .                  | .            | . | . | .                  | . | . |
| Vv14g0884          | .            | . | . | .                  | . | . |
| .                  | .            | . | . | .                  | . | . |
| Vv14g0885          | .            | . | . | .                  | . | . |
| .                  | .            | . | . | .                  | . | . |
| Vv14g0886          | Tc04_g015640 | . | . | .                  | . | . |
| .                  | .            | . | . | .                  | . | . |
| Vv14g0887          | Tc04_g015650 | . | . | .                  | . | . |
| .                  | .            | . | . | .                  | . | . |
| Vv14g0888          | .            | . | . | .                  | . | . |
| .                  | .            | . | . | .                  | . | . |
| Vv14g0889          | .            | . | . | .                  | . | . |
| .                  | .            | . | . | .                  | . | . |
| Vv14g0890          | Tc04_g015680 | . | . | .                  | . | . |

|                                 |              |  |                    |  |        |           |
|---------------------------------|--------------|--|--------------------|--|--------|-----------|
| Vv14g0891                       |              |  |                    |  |        |           |
| Vv14g0892                       |              |  |                    |  |        |           |
| Vv14g0893                       |              |  |                    |  |        |           |
| Vv14g0894                       | Tc04_g004790 |  |                    |  |        |           |
| Vv14g0895                       |              |  |                    |  |        |           |
| Vv14g0896                       |              |  |                    |  |        | Vv01g0001 |
| Vv14g0897<br>007G184400.1       |              |  | Gorai.001G205700.1 |  | Gorai. |           |
| Vv14g0898                       |              |  | Gorai.001G205800.1 |  |        |           |
| Vv14g0899                       | Tc04_g015740 |  |                    |  |        |           |
| Vv14g0900<br>Gorai.012G082800.1 | Tc04_g005140 |  |                    |  |        |           |
| Vv14g0901                       |              |  |                    |  |        |           |
| Vv14g0902                       |              |  | Gorai.001G206000.1 |  |        |           |
| Vv14g0903                       |              |  |                    |  |        |           |
| Vv14g0904                       |              |  |                    |  |        |           |
| Vv14g0905                       |              |  |                    |  |        |           |
| Vv14g0906                       |              |  | Gorai.001G206200.1 |  |        |           |

|              |                    |                    |   |                    |        |   |   |
|--------------|--------------------|--------------------|---|--------------------|--------|---|---|
| Vv14g0907    | .                  | .                  | . | .                  | .      | . | . |
| .            | .                  | .                  | . | .                  | .      | . | . |
| Vv14g0908    | Tc04_g002220       | .                  | . | .                  | .      | . | . |
| .            | .                  | .                  | . | .                  | .      | . | . |
| Vv14g0909    | Tc05_g023260       | .                  | . | .                  | .      | . | . |
| .            | .                  | .                  | . | .                  | .      | . | . |
| Vv14g0910    | Tc04_g017860       | .                  | . | .                  | .      | . | . |
| .            | .                  | .                  | . | .                  | .      | . | . |
| Vv14g0911    | .                  | .                  | . | .                  | .      | . | . |
| .            | .                  | .                  | . | .                  | .      | . | . |
| Vv14g0912    | Tc04_g002020       | .                  | . | .                  | .      | . | . |
| .            | .                  | .                  | . | .                  | .      | . | . |
| Vv14g0913    | Tc04_g002010       | Gorai.011G094300.1 | . | .                  | .      | . | . |
| .            | .                  | .                  | . | .                  | .      | . | . |
| Vv14g0914    | Tc04_g002000       | Gorai.011G094400.1 | . | .                  | .      | . | . |
| .            | .                  | .                  | . | .                  | .      | . | . |
| Vv14g0915    | .                  | .                  | . | .                  | .      | . | . |
| .            | .                  | .                  | . | .                  | .      | . | . |
| Vv14g0916    | Tc04_g015880       | .                  | . | Gorai.007G175600.1 | .      | . | . |
| .            | .                  | .                  | . | .                  | .      | . | . |
| Vv14g0917    | .                  | .                  | . | .                  | .      | . | . |
| Vv17g0512    | Tc03_g012770       | Gorai.001G066500.1 | . | .                  | .      | . | . |
|              | Gorai.008G175000.1 | .                  | . | .                  | .      | . | . |
| .            | .                  | .                  | . | .                  | .      | . | . |
| Vv14g0918    | .                  | .                  | . | .                  | .      | . | . |
| .            | .                  | .                  | . | .                  | .      | . | . |
| Vv14g0919    | Tc04_g020920       | .                  | . | .                  | Gorai. | . | . |
| 011G156300.1 | .                  | .                  | . | .                  | .      | . | . |
| .            | .                  | .                  | . | .                  | .      | . | . |
| Vv14g0920    | .                  | .                  | . | .                  | .      | . | . |
| .            | .                  | .                  | . | .                  | .      | . | . |
| Vv14g0921    | .                  | .                  | . | Gorai.007G040600.1 | .      | . | . |
| .            | Vv17g0513          | Tc03_g012760       | . | .                  | .      | . | . |
|              | Gorai.008G175100.1 | Gorai.006G269200.1 | . | .                  | .      | . | . |
| .            | .                  | .                  | . | .                  | .      | . | . |
| Vv14g0922    | .                  | .                  | . | .                  | .      | . | . |
| Vv17g0514    | Tc03_g012750       | Gorai.001G066600.1 | . | .                  | .      | . | . |

|                    |                    |                    |                    |   |   |   |
|--------------------|--------------------|--------------------|--------------------|---|---|---|
| Gorai.007G040500.1 | .                  | .                  | .                  | . | . | . |
| Vv14g0923          | .                  | .                  | .                  | . | . | . |
| Vv14g0924          | .                  | .                  | Gorai.001G206500.1 | . | . | . |
| Vv14g0925          | .                  | .                  | .                  | . | . | . |
| Vv14g0926          | .                  | .                  | .                  | . | . | . |
| Vv17g0525          | .                  | Gorai.001G067500.1 | .                  | . | . | . |
| Vv14g0927          | .                  | .                  | .                  | . | . | . |
| Vv14g0928          | .                  | .                  | .                  | . | . | . |
| Vv14g0929          | .                  | .                  | Gorai.001G206900.1 | . | . | . |
| Vv14g0930          | .                  | .                  | Gorai.001G207000.1 | . | . | . |
| Vv14g0931          | .                  | .                  | Gorai.001G207100.1 | . | . | . |
| Vv14g0932          | .                  | .                  | Gorai.001G207200.1 | . | . | . |
| Vv14g0933          | .                  | .                  | .                  | . | . | . |
| Vv14g0934          | Tc05_g031790       | .                  | .                  | . | . | . |
| Vv17g0538          | Tc03_g012620       | .                  | .                  | . | . | . |
| Vv01g0014          | Tc02_g031670       | Gorai.013G096100.1 | .                  | . | . | . |
| Gorai.005G147200.1 | .                  | .                  | .                  | . | . | . |
| Vv14g0935          | .                  | .                  | .                  | . | . | . |
| Vv14g0936          | .                  | .                  | .                  | . | . | . |
| Vv17g0539          | Tc03_g012600       | Gorai.001G075800.1 | .                  | . | . | . |
| Tc02_g031690       | Gorai.006G268400.1 | Vv01g0017          | .                  | . | . | . |
| Vv14g0937          | Gorai.013G096000.1 | .                  | .                  | . | . | . |
| Vv14g0938          | Tc05_g023430       | Gorai.013G113000.1 | .                  | . | . | . |

|                    |                    |                    |                    |              |   |   |   |
|--------------------|--------------------|--------------------|--------------------|--------------|---|---|---|
| .                  | .                  | .                  | .                  | .            | . | . | . |
| .                  | .                  | .                  | .                  | .            | . | . | . |
| Vv14g0939          | .                  | .                  | .                  | .            | . | . | . |
| .                  | .                  | .                  | .                  | .            | . | . | . |
| Vv14g0940          | .                  | .                  | Gorai.001G207700.1 | .            | . | . | . |
| .                  | .                  | .                  | .                  | .            | . | . | . |
| Vv14g0941          | .                  | .                  | Gorai.001G208000.1 | Gorai.       | . | . | . |
| 007G039800.1       | .                  | .                  | Vv17g0542          | Tc03_g012560 | . | . | . |
| Gorai.001G076300.1 | .                  | .                  | Gorai.008G200200.1 | .            | . | . | . |
| Vv01g0021          | Tc02_g031760       | Gorai.013G095500.1 | .                  | .            | . | . | . |
| .                  | Gorai.008G200200.1 | .                  | .                  | .            | . | . | . |
| Vv14g0942          | Tc04_g021220       | .                  | .                  | Gorai.       | . | . | . |
| 011G158000.1       | .                  | .                  | .                  | .            | . | . | . |
| .                  | .                  | .                  | .                  | .            | . | . | . |
| Vv14g0943          | .                  | Gorai.001G208200.1 | .                  | .            | . | . | . |
| .                  | .                  | .                  | .                  | .            | . | . | . |
| Vv14g0944          | .                  | .                  | .                  | .            | . | . | . |
| .                  | .                  | .                  | .                  | .            | . | . | . |
| Vv14g0945          | .                  | .                  | .                  | .            | . | . | . |
| .                  | .                  | .                  | .                  | .            | . | . | . |
| Vv14g0946          | .                  | .                  | .                  | .            | . | . | . |
| .                  | .                  | .                  | .                  | .            | . | . | . |
| Vv14g0947          | .                  | .                  | .                  | .            | . | . | . |
| .                  | .                  | .                  | .                  | .            | . | . | . |
| Vv14g0948          | .                  | .                  | .                  | .            | . | . | . |
| Vv17g0546          | Tc03_g012490       | Gorai.001G076200.1 | .                  | .            | . | . | . |
| Gorai.008G200100.1 | .                  | .                  | .                  | .            | . | . | . |
| .                  | .                  | .                  | .                  | .            | . | . | . |
| Vv14g0949          | .                  | Gorai.001G208300.1 | .                  | .            | . | . | . |
| .                  | Vv17g0547          | Tc03_g012460       | .                  | .            | . | . | . |
| Gorai.008G200000.1 | .                  | .                  | .                  | .            | . | . | . |
| .                  | .                  | .                  | .                  | .            | . | . | . |
| Vv14g0950          | .                  | .                  | .                  | .            | . | . | . |
| .                  | .                  | .                  | .                  | .            | . | . | . |
| Vv14g0951          | .                  | .                  | .                  | .            | . | . | . |
| .                  | .                  | .                  | .                  | .            | . | . | . |
| Vv14g0952          | .                  | Gorai.001G208400.1 | .                  | .            | . | . | . |
| .                  | .                  | .                  | .                  | .            | . | . | . |
| Vv14g0953          | .                  | Gorai.001G208500.1 | .                  | .            | . | . | . |
| .                  | .                  | .                  | .                  | .            | . | . | . |

|              |              |   |                    |   |   |        |   |
|--------------|--------------|---|--------------------|---|---|--------|---|
| Vv14g0954    | .            | . | .                  | . | . | .      | . |
| .            | .            | . | .                  | . | . | .      | . |
| Vv14g0955    | Tc04_g015890 | . | .                  | . | . | Gorai. | . |
| 011G124900.1 | .            | . | .                  | . | . | .      | . |
| Vv14g0956    | .            | . | .                  | . | . | .      | . |
| .            | .            | . | .                  | . | . | .      | . |
| Vv14g0957    | .            | . | .                  | . | . | .      | . |
| .            | .            | . | .                  | . | . | .      | . |
| Vv14g0958    | .            | . | .                  | . | . | .      | . |
| .            | .            | . | .                  | . | . | .      | . |
| Vv14g0959    | .            | . | .                  | . | . | .      | . |
| .            | .            | . | .                  | . | . | .      | . |
| Vv14g0960    | .            | . | Gorai.001G208900.1 | . | . | .      | . |
| .            | .            | . | .                  | . | . | .      | . |
| Vv01g0030    | .            | . | .                  | . | . | .      | . |
| Vv14g0961    | .            | . | .                  | . | . | .      | . |
| .            | .            | . | .                  | . | . | .      | . |
| Vv14g0962    | .            | . | .                  | . | . | .      | . |
| .            | .            | . | .                  | . | . | .      | . |
| Vv14g0963    | .            | . | .                  | . | . | .      | . |
| .            | .            | . | .                  | . | . | .      | . |
| Vv14g0964    | .            | . | .                  | . | . | .      | . |
| .            | .            | . | .                  | . | . | .      | . |
| Vv14g0965    | Tc04_g020290 | . | .                  | . | . | Gorai. | . |
| 011G151900.1 | .            | . | .                  | . | . | .      | . |
| Vv14g0966    | .            | . | .                  | . | . | .      | . |
| .            | .            | . | .                  | . | . | .      | . |
| Vv14g0967    | Tc05_g031690 | . | .                  | . | . | .      | . |
| .            | .            | . | .                  | . | . | .      | . |
| Vv14g0968    | .            | . | .                  | . | . | .      | . |
| .            | .            | . | .                  | . | . | .      | . |
| Vv14g0969    | .            | . | .                  | . | . | .      | . |
| .            | .            | . | .                  | . | . | .      | . |
| Vv14g0970    | Tc04_g016050 | . | .                  | . | . | .      | . |

|              |                    |                    |   |                    |   |   |   |
|--------------|--------------------|--------------------|---|--------------------|---|---|---|
| .            | .                  | .                  | . | .                  | . | . | . |
| .            | .                  | .                  | . | .                  | . | . | . |
| Vv14g0971    | .                  | .                  | . | .                  | . | . | . |
| .            | .                  | .                  | . | .                  | . | . | . |
| Vv14g0972    | .                  | .                  | . | .                  | . | . | . |
| .            | .                  | .                  | . | .                  | . | . | . |
| Vv14g0973    | .                  | .                  | . | .                  | . | . | . |
| .            | .                  | .                  | . | .                  | . | . | . |
| Vv14g0974    | .                  | .                  | . | .                  | . | . | . |
| .            | .                  | .                  | . | .                  | . | . | . |
| Vv14g0975    | .                  | .                  | . | .                  | . | . | . |
| .            | .                  | .                  | . | .                  | . | . | . |
| Vv14g0976    | .                  | .                  | . | Gorai.007G082800.1 | . | . | . |
| .            | .                  | .                  | . | .                  | . | . | . |
| Vv14g0977    | .                  | .                  | . | .                  | . | . | . |
| .            | .                  | .                  | . | .                  | . | . | . |
| Vv14g0978    | .                  | .                  | . | Gorai.006G010500.1 | . | . | . |
| .            | .                  | .                  | . | .                  | . | . | . |
| Vv14g0979    | Tc05_g019280       | .                  | . | .                  | . | . | . |
| .            | .                  | .                  | . | .                  | . | . | . |
| Vv14g0980    | .                  | .                  | . | Gorai.007G082700.1 | . | . | . |
| .            | .                  | .                  | . | .                  | . | . | . |
| Vv14g0981    | .                  | .                  | . | Gorai.006G010200.1 | . | . | . |
| .            | .                  | .                  | . | .                  | . | . | . |
| Vv14g0982    | .                  | .                  | . | .                  | . | . | . |
| .            | .                  | .                  | . | .                  | . | . | . |
| Vv14g0983    | Tc04_g026560       | .                  | . | .                  | . | . | . |
| .            | .                  | .                  | . | .                  | . | . | . |
| Vv14g0984    | .                  | .                  | . | Gorai.006G010000.1 | . | . | . |
| .            | .                  | .                  | . | .                  | . | . | . |
| Vv01g0039    | Tc02_g031980       | Gorai.013G094600.1 | . | .                  | . | . | . |
| .            | Gorai.008G176700.1 | .                  | . | .                  | . | . | . |
| Vv14g0985    | Tc04_g026400       | Gorai.007G039600.1 | . | .                  | . | . | . |
| .            | Gorai.006G009900.1 | Vv17g0567          | . | .                  | . | . | . |
| Tc03_g012260 | .                  | .                  | . | .                  | . | . | . |
| .            | .                  | .                  | . | .                  | . | . | . |
| Vv14g0986    | .                  | .                  | . | .                  | . | . | . |



|              |              |   |   |   |   |                    |   |
|--------------|--------------|---|---|---|---|--------------------|---|
| Vv14g0987    | .            | . | . | . | . | Gorai.006G009800.1 | . |
| Vv14g0988    | .            | . | . | . | . | .                  | . |
| Vv14g0989    | .            | . | . | . | . | Gorai.006G009600.1 | . |
| Vv14g0990    | .            | . | . | . | . | .                  | . |
| Tc02_g032160 | .            | . | . | . | . | Vv01g0054          | . |
|              | .            | . | . | . | . | Gorai.008G177500.1 | . |
| Vv14g0991    | .            | . | . | . | . | Gorai.006G007300.1 | . |
| Vv14g0992    | .            | . | . | . | . | .                  | . |
| Vv14g0993    | Tc04_g026240 | . | . | . | . | .                  | . |
| Vv14g0994    | .            | . | . | . | . | .                  | . |
| Vv14g0995    | .            | . | . | . | . | Gorai.007G039300.1 | . |
| Vv14g0996    | Tc04_g020280 | . | . | . | . | .                  | . |
| Vv14g0997    | Tc05_g019240 | . | . | . | . | .                  | . |
| Vv14g0998    | Tc05_g022410 | . | . | . | . | .                  | . |
| Vv14g0999    | .            | . | . | . | . | Gorai.007G036500.1 | . |
| Vv14g1000    | Tc05_g022430 | . | . | . | . | .                  | . |
| Vv14g1001    | .            | . | . | . | . | Gorai.007G082000.1 | . |
| Vv14g1002    | .            | . | . | . | . | Gorai.007G079000.1 | . |

|           |                    |                    |                    |           |   |
|-----------|--------------------|--------------------|--------------------|-----------|---|
| Vv14g1003 | Tc04_g016460       | .                  | .                  | .         | . |
| .         | .                  | .                  | .                  | .         | . |
| Vv14g1004 | .                  | .                  | .                  | .         | . |
| .         | .                  | .                  | .                  | .         | . |
| Vv14g1005 | .                  | .                  | .                  | .         | . |
| .         | .                  | .                  | .                  | .         | . |
| Vv14g1006 | .                  | .                  | .                  | .         | . |
| .         | .                  | .                  | .                  | .         | . |
| Vv14g1007 | .                  | .                  | .                  | .         | . |
| .         | .                  | .                  | .                  | .         | . |
| Vv14g1008 | .                  | .                  | .                  | .         | . |
| .         | .                  | .                  | .                  | .         | . |
| Vv14g1009 | .                  | .                  | .                  | .         | . |
| .         | .                  | .                  | .                  | .         | . |
| Vv14g1010 | .                  | .                  | .                  | .         | . |
| .         | .                  | .                  | .                  | .         | . |
| Vv14g1011 | .                  | .                  | .                  | .         | . |
| .         | .                  | .                  | .                  | .         | . |
| Vv14g1012 | .                  | .                  | .                  | .         | . |
| Vv17g0163 | Tc03_g014500       | Gorai.001G060700.1 | .                  | .         | . |
|           | Gorai.008G202600.1 | Gorai.006G271000.1 | .                  | .         | . |
| .         | .                  | .                  | .                  | .         | . |
| Vv14g1013 | .                  | .                  | .                  | .         | . |
| .         | .                  | .                  | .                  | .         | . |
| Vv14g1014 | .                  | .                  | .                  | .         | . |
| .         | .                  | .                  | .                  | .         | . |
| Vv14g1015 | .                  | .                  | .                  | .         | . |
| .         | .                  | .                  | .                  | .         | . |
| Vv14g1016 | .                  | .                  | .                  | .         | . |
| .         | .                  | .                  | .                  | .         | . |
| Vv14g1017 | .                  | Gorai.011G088800.1 | Gorai.001G276400.1 | .         | . |
|           | Gorai.007G074000.1 | Gorai.006G038900.1 | .                  | Vv01g1311 | . |
| .         | .                  | .                  | .                  | .         | . |
| Vv14g1018 | .                  | Gorai.001G276300.1 | .                  | .         | . |
| .         | .                  | .                  | .                  | .         | . |

|                    |              |   |   |   |                    |   |   |
|--------------------|--------------|---|---|---|--------------------|---|---|
| Vv14g1019          | .            | . | . | . | .                  | . | . |
| .                  | .            | . | . | . | .                  | . | . |
| Vv14g1020          | .            | . | . | . | .                  | . | . |
| .                  | .            | . | . | . | .                  | . | . |
| Vv14g1021          | .            | . | . | . | .                  | . | . |
| .                  | .            | . | . | . | .                  | . | . |
| Vv14g1022          | .            | . | . | . | Gorai.007G045600.1 | . | . |
| Gorai.006G040900.1 | .            | . | . | . | .                  | . | . |
| .                  | .            | . | . | . | .                  | . | . |
| Vv14g1023          | .            | . | . | . | .                  | . | . |
| .                  | .            | . | . | . | .                  | . | . |
| Vv14g1024          | Tc04_g005560 | . | . | . | .                  | . | . |
| .                  | .            | . | . | . | .                  | . | . |
| Vv01g1298          | .            | . | . | . | .                  | . | . |
| Vv14g1025          | Tc05_g022730 | . | . | . | .                  | . | . |
| .                  | .            | . | . | . | .                  | . | . |
| Vv14g1026          | .            | . | . | . | .                  | . | . |
| .                  | .            | . | . | . | .                  | . | . |
| Vv14g1027          | Tc04_g005550 | . | . | . | .                  | . | . |
| .                  | .            | . | . | . | .                  | . | . |
| Vv14g1028          | .            | . | . | . | .                  | . | . |
| .                  | .            | . | . | . | .                  | . | . |
| Vv14g1029          | Tc04_g005520 | . | . | . | .                  | . | . |
| .                  | .            | . | . | . | .                  | . | . |
| Vv14g1030          | .            | . | . | . | .                  | . | . |
| .                  | .            | . | . | . | .                  | . | . |
| Vv14g1031          | .            | . | . | . | .                  | . | . |
| .                  | .            | . | . | . | .                  | . | . |
| Vv14g1032          | Tc04_g005510 | . | . | . | .                  | . | . |
| .                  | .            | . | . | . | .                  | . | . |
| Vv14g1033          | Tc04_g005500 | . | . | . | .                  | . | . |
| .                  | .            | . | . | . | .                  | . | . |
| Vv14g1034          | .            | . | . | . | Gorai.006G000100.1 | . | . |
| .                  | .            | . | . | . | .                  | . | . |
| .                  | .            | . | . | . | .                  | . | . |

|                    |              |              |   |   |                    |   |   |
|--------------------|--------------|--------------|---|---|--------------------|---|---|
| Vv14g1035          | .            | .            | . | . | .                  | . | . |
| .                  | .            | .            | . | . | .                  | . | . |
| Vv14g1036          | .            | .            | . | . | .                  | . | . |
| .                  | .            | .            | . | . | .                  | . | . |
| Vv14g1037          | .            | .            | . | . | .                  | . | . |
| .                  | .            | .            | . | . | .                  | . | . |
| Vv14g1038          | Tc04_g005480 | .            | . | . | .                  | . | . |
| Gorai.012G082500.1 | Vv17g0177    | Tc03_g007940 | . | . | .                  | . | . |
| .                  | .            | .            | . | . | .                  | . | . |
| Vv14g1039          | Tc04_g005470 | .            | . | . | .                  | . | . |
| .                  | .            | .            | . | . | .                  | . | . |
| Vv14g1040          | Tc04_g005460 | .            | . | . | .                  | . | . |
| Vv17g0189          | .            | .            | . | . | Gorai.005G133500.1 | . | . |
| .                  | Vv01g1294    | .            | . | . | .                  | . | . |
| Gorai.008G155700.1 | .            | .            | . | . | .                  | . | . |
| Vv14g1041          | Tc04_g005410 | .            | . | . | .                  | . | . |
| Vv01g1293          | .            | .            | . | . | .                  | . | . |
| .                  | .            | .            | . | . | .                  | . | . |
| Vv14g1042          | Tc04_g005400 | .            | . | . | .                  | . | . |
| .                  | .            | .            | . | . | .                  | . | . |
| Vv14g1043          | Tc04_g005390 | .            | . | . | .                  | . | . |
| .                  | .            | .            | . | . | .                  | . | . |
| Vv14g1044          | Tc04_g005360 | .            | . | . | Gorai.             | . | . |
| 006G000200.1       | .            | .            | . | . | .                  | . | . |
| .                  | .            | .            | . | . | .                  | . | . |
| Vv14g1045          | .            | .            | . | . | .                  | . | . |
| .                  | .            | .            | . | . | .                  | . | . |
| Vv14g1046          | .            | .            | . | . | .                  | . | . |
| .                  | .            | .            | . | . | .                  | . | . |
| Vv14g1047          | Tc04_g005330 | .            | . | . | .                  | . | . |
| .                  | .            | .            | . | . | .                  | . | . |
| Vv14g1048          | Tc04_g005320 | .            | . | . | Gorai.007G073200.1 | . | . |
| .                  | .            | .            | . | . | .                  | . | . |
| Vv14g1049          | Tc04_g005310 | .            | . | . | Gorai.007G073100.1 | . | . |
| .                  | .            | .            | . | . | .                  | . | . |
| Vv14g1050          | Tc04_g005300 | .            | . | . | .                  | . | . |
| .                  | .            | .            | . | . | .                  | . | . |
| .                  | .            | .            | . | . | .                  | . | . |

|                    |                    |                    |                    |                    |   |   |
|--------------------|--------------------|--------------------|--------------------|--------------------|---|---|
| Vv14g1051          | Tc04_g005290       | .                  | .                  | .                  | . | . |
| .                  | .                  | .                  | .                  | .                  | . | . |
| Vv14g1052          | Tc04_g005280       | Gorai.011G088500.1 | .                  | .                  | . | . |
| Gorai.007G073000.1 | .                  | .                  | .                  | .                  | . | . |
| .                  | .                  | .                  | .                  | .                  | . | . |
| Vv14g1053          | Tc04_g005270       | .                  | .                  | Gorai.007G072900.1 | . | . |
| .                  | .                  | .                  | .                  | .                  | . | . |
| Vv14g1054          | Tc04_g005260       | .                  | .                  | Gorai.007G072800.1 | . | . |
| .                  | Vv01g1277          | .                  | .                  | .                  | . | . |
| .                  | .                  | .                  | .                  | .                  | . | . |
| Vv14g1055          | Tc05_g025670       | .                  | .                  | .                  | . | . |
| .                  | .                  | .                  | .                  | .                  | . | . |
| Vv14g1056          | Tc04_g005230       | .                  | Gorai.001G276200.1 | .                  | . | . |
| .                  | .                  | .                  | .                  | .                  | . | . |
| Vv14g1057          | Tc04_g005210       | .                  | .                  | .                  | . | . |
| Gorai.012G082600.1 | .                  | .                  | .                  | .                  | . | . |
| .                  | .                  | .                  | .                  | .                  | . | . |
| Vv14g1058          | Tc05_g025990       | .                  | .                  | .                  | . | . |
| Vv01g1266          | Tc02_g002960       | .                  | Gorai.005G196900.1 | .                  | . | . |
| .                  | .                  | .                  | .                  | .                  | . | . |
| Vv14g1059          | .                  | .                  | .                  | .                  | . | . |
| .                  | .                  | .                  | .                  | .                  | . | . |
| Vv14g1060          | Tc04_g005190       | .                  | .                  | Gorai.             | . | . |
| 006G000300.1       | Gorai.012G082700.1 | .                  | .                  | .                  | . | . |
| .                  | .                  | .                  | .                  | .                  | . | . |
| Vv14g1061          | Tc04_g005180       | .                  | .                  | .                  | . | . |
| Vv17g0028          | Tc03_g015790       | .                  | .                  | .                  | . | . |
| .                  | .                  | .                  | .                  | .                  | . | . |
| Vv14g1062          | .                  | .                  | .                  | .                  | . | . |
| Vv17g0029          | Tc03_g015780       | .                  | .                  | .                  | . | . |
| .                  | .                  | .                  | .                  | .                  | . | . |
| Vv14g1063          | Tc04_g005170       | Gorai.011G088400.1 | .                  | .                  | . | . |
| .                  | .                  | .                  | .                  | .                  | . | . |
| Vv14g1064          | Tc04_g005160       | .                  | .                  | .                  | . | . |
| .                  | .                  | .                  | .                  | .                  | . | . |
| Vv14g1065          | .                  | .                  | .                  | .                  | . | . |
| .                  | .                  | .                  | .                  | .                  | . | . |
| Vv14g1066          | Tc04_g005150       | .                  | .                  | Gorai.007G072700.1 | . | . |

|                    |                    |                    |                    |   |   |   |   |
|--------------------|--------------------|--------------------|--------------------|---|---|---|---|
| .                  | .                  | .                  | .                  | . | . | . | . |
| .                  | Vv01g1259          | .                  | .                  | . | . | . | . |
| Vv14g1067          | Gorai.012G125000.1 | .                  | .                  | . | . | . | . |
| .                  | Tc04_g005140       | .                  | Gorai.001G275900.1 | . | . | . | . |
| .                  | Gorai.012G082800.1 | .                  | .                  | . | . | . | . |
| .                  | .                  | .                  | .                  | . | . | . | . |
| Vv14g1068          | Tc04_g005120       | .                  | Gorai.001G275800.1 | . | . | . | . |
| .                  | .                  | .                  | .                  | . | . | . | . |
| Vv14g1069          | Tc04_g005100       | .                  | Gorai.001G275700.1 | . | . | . | . |
| .                  | Gorai.006G000400.1 | .                  | .                  | . | . | . | . |
| .                  | .                  | Vv01g1255          | Tc02_g019700       | . | . | . | . |
| Vv14g1070          | .                  | .                  | .                  | . | . | . | . |
| .                  | .                  | .                  | .                  | . | . | . | . |
| Vv14g1071          | Tc04_g005090       | .                  | Gorai.001G275600.1 | . | . | . | . |
| Gorai.007G044800.1 | .                  | .                  | .                  | . | . | . | . |
| .                  | .                  | .                  | .                  | . | . | . | . |
| Vv14g1072          | Tc04_g005080       | .                  | Gorai.001G275500.1 | . | . | . | . |
| .                  | Gorai.006G041300.1 | .                  | .                  | . | . | . | . |
| .                  | .                  | .                  | .                  | . | . | . | . |
| Vv14g1073          | Tc04_g005070       | .                  | .                  | . | . | . | . |
| .                  | Vv17g0036          | .                  | .                  | . | . | . | . |
| Gorai.006G273600.1 | .                  | .                  | .                  | . | . | . | . |
| .                  | .                  | .                  | .                  | . | . | . | . |
| Vv14g1074          | .                  | .                  | .                  | . | . | . | . |
| .                  | .                  | .                  | .                  | . | . | . | . |
| Vv14g1075          | Tc04_g005050       | Gorai.011G088100.1 | Gorai.             | . | . | . | . |
| 001G275400.1       | .                  | .                  | .                  | . | . | . | . |
| .                  | .                  | .                  | .                  | . | . | . | . |
| Vv14g1076          | Tc04_g005020       | .                  | .                  | . | . | . | . |
| .                  | .                  | .                  | .                  | . | . | . | . |
| Vv14g1077          | .                  | .                  | .                  | . | . | . | . |
| .                  | .                  | .                  | .                  | . | . | . | . |
| Vv14g1078          | Tc04_g004990       | .                  | Gorai.007G044500.1 | . | . | . | . |
| .                  | .                  | .                  | .                  | . | . | . | . |
| Vv14g1079          | .                  | .                  | .                  | . | . | . | . |
| .                  | .                  | .                  | .                  | . | . | . | . |
| Vv14g1080          | Tc04_g004980       | .                  | Gorai.007G072500.1 | . | . | . | . |
| .                  | Gorai.012G082900.1 | Vv17g0045          | .                  | . | . | . | . |

|                    |                    |   |                    |   |                    |   |   |
|--------------------|--------------------|---|--------------------|---|--------------------|---|---|
| .                  | .                  | . | .                  | . | .                  | . | . |
| .                  | .                  | . | .                  | . | .                  | . | . |
| Vv14g1081          | Tc04_g004970       | . | .                  | . | .                  | . | . |
| .                  | .                  | . | .                  | . | .                  | . | . |
| .                  | .                  | . | .                  | . | .                  | . | . |
| Vv14g1082          | Tc04_g004880       | . | .                  | . | .                  | . | . |
| Vv17g0048          | Tc03_g015590       | . | .                  | . | .                  | . | . |
| Gorai.008G209600.1 | .                  | . | .                  | . | .                  | . | . |
| .                  | .                  | . | .                  | . | .                  | . | . |
| Vv14g1083          | .                  | . | .                  | . | .                  | . | . |
| .                  | .                  | . | .                  | . | .                  | . | . |
| .                  | .                  | . | .                  | . | .                  | . | . |
| Vv14g1084          | Tc04_g004860       | . | .                  | . | Gorai.007G072400.1 | . | . |
| .                  | .                  | . | .                  | . | .                  | . | . |
| .                  | Vv01g1237          | . | .                  | . | .                  | . | . |
| .                  | .                  | . | .                  | . | .                  | . | . |
| Vv14g1085          | .                  | . | .                  | . | .                  | . | . |
| .                  | .                  | . | .                  | . | .                  | . | . |
| .                  | .                  | . | .                  | . | .                  | . | . |
| Vv14g1086          | .                  | . | .                  | . | .                  | . | . |
| .                  | .                  | . | .                  | . | .                  | . | . |
| .                  | .                  | . | .                  | . | .                  | . | . |
| Vv14g1087          | Tc04_g004840       | . | .                  | . | .                  | . | . |
| .                  | .                  | . | .                  | . | .                  | . | . |
| Vv01g1233          | .                  | . | Gorai.005G196000.1 | . | .                  | . | . |
| .                  | .                  | . | .                  | . | .                  | . | . |
| Vv14g1088          | Tc04_g004800       | . | .                  | . | Gorai.             | . | . |
| 006G000600.1       | Gorai.012G083000.1 | . | .                  | . | .                  | . | . |
| .                  | .                  | . | .                  | . | .                  | . | . |
| .                  | .                  | . | .                  | . | .                  | . | . |
| Vv14g1089          | Tc04_g004790       | . | .                  | . | .                  | . | . |
| Gorai.012G083100.1 | .                  | . | .                  | . | .                  | . | . |
| .                  | Vv01g1225          | . | .                  | . | Gorai.005G195800.1 | . | . |
| .                  | .                  | . | .                  | . | .                  | . | . |
| Vv14g1090          | Tc04_g004780       | . | .                  | . | .                  | . | . |
| .                  | .                  | . | .                  | . | .                  | . | . |
| .                  | .                  | . | .                  | . | .                  | . | . |
| Vv14g1091          | Tc04_g004770       | . | .                  | . | Gorai.007G044200.1 | . | . |
| Gorai.006G000900.1 | .                  | . | .                  | . | Vv17g0051          | . | . |
| Tc03_g015560       | .                  | . | .                  | . | Gorai.006G272700.1 | . | . |
| .                  | .                  | . | .                  | . | .                  | . | . |
| Vv14g1092          | .                  | . | .                  | . | .                  | . | . |
| .                  | .                  | . | .                  | . | .                  | . | . |
| .                  | .                  | . | .                  | . | .                  | . | . |
| Vv14g1093          | Tc04_g004760       | . | .                  | . | Gorai.007G072100.1 | . | . |
| Gorai.006G001000.1 | .                  | . | .                  | . | .                  | . | . |
| .                  | .                  | . | .                  | . | .                  | . | . |
| .                  | .                  | . | .                  | . | .                  | . | . |
| Vv14g1094          | Tc04_g004750       | . | .                  | . | .                  | . | . |
| .                  | .                  | . | .                  | . | .                  | . | . |

|                    |                    |                    |        |                    |   |
|--------------------|--------------------|--------------------|--------|--------------------|---|
| Vv14g1095          | Tc04_g004740       | .                  | .      | .                  | . |
| .                  | .                  | .                  | .      | .                  | . |
| Vv14g1096          | .                  | .                  | .      | .                  | . |
| .                  | .                  | .                  | .      | .                  | . |
| Vv14g1097          | .                  | .                  | .      | .                  | . |
| .                  | .                  | .                  | .      | .                  | . |
| Vv14g1098          | Tc04_g004730       | .                  | .      | .                  | . |
| Gorai.012G083200.1 | .                  | .                  | .      | .                  | . |
| .                  | .                  | .                  | .      | .                  | . |
| Vv14g1099          | Tc04_g004720       | .                  | .      | .                  | . |
| Gorai.012G083300.1 | Vv17g0052          | Tc03_g015550       | .      | .                  | . |
| .                  | .                  | .                  | .      | .                  | . |
| .                  | .                  | .                  | .      | .                  | . |
| Vv14g1100          | Tc04_g004710       | .                  | .      | .                  | . |
| Gorai.012G083400.1 | .                  | .                  | .      | .                  | . |
| .                  | .                  | .                  | .      | .                  | . |
| Vv14g1101          | Tc04_g004700       | .                  | .      | .                  | . |
| Gorai.012G083500.1 | .                  | .                  | .      | .                  | . |
| .                  | Vv01g1222          | .                  | .      | Gorai.005G195700.1 | . |
| .                  | Gorai.008G156600.1 | .                  | .      | .                  | . |
| Vv14g1102          | Tc04_g004670       | .                  | .      | .                  | . |
| Gorai.012G083700.1 | .                  | .                  | .      | .                  | . |
| .                  | .                  | .                  | .      | .                  | . |
| Vv14g1103          | Tc04_g004640       | Gorai.011G087800.1 | Gorai. | .                  | . |
| 001G274600.1       | .                  | .                  | .      | .                  | . |
| .                  | .                  | .                  | .      | .                  | . |
| .                  | .                  | .                  | .      | .                  | . |
| Vv14g1104          | .                  | .                  | .      | .                  | . |
| Vv17g0070          | Tc03_g015480       | .                  | .      | Gorai.             | . |
| 008G209300.1       | .                  | .                  | .      | .                  | . |
| .                  | .                  | .                  | .      | .                  | . |
| Vv14g1105          | Tc04_g004620       | .                  | .      | .                  | . |
| .                  | .                  | .                  | .      | .                  | . |
| .                  | .                  | .                  | .      | .                  | . |
| Vv14g1106          | Tc04_g004610       | .                  | .      | Gorai.             | . |
| 006G044900.1       | Vv17g0071          | Tc03_g015470       | .      | .                  | . |
| .                  | Gorai.008G209200.1 | .                  | .      | .                  | . |
| .                  | .                  | .                  | .      | .                  | . |
| Vv14g1107          | Tc04_g004590       | .                  | .      | Gorai.007G071900.1 | . |
| .                  | .                  | .                  | .      | .                  | . |
| .                  | .                  | .                  | .      | .                  | . |
| Vv14g1108          | Tc04_g004580       | .                  | .      | Gorai.             | . |
| 006G044700.1       | Vv17g0074          | .                  | .      | .                  | . |
| .                  | .                  | .                  | .      | .                  | . |
| .                  | .                  | .                  | .      | .                  | . |
| Vv14g1109          | Tc04_g004560       | .                  | .      | Gorai.             | . |



|                    |                    |                    |                    |   |
|--------------------|--------------------|--------------------|--------------------|---|
| 006G044500.1       | Gorai.012G083900.1 | Vv17g0075          | .                  | . |
| .                  | .                  | .                  | .                  | . |
| .                  | .                  | .                  | .                  | . |
| Vv14g1110          | .                  | .                  | Gorai.             | . |
| 012G084000.1       | .                  | .                  | .                  | . |
| Vv01g1211          | Tc02_g018390       | .                  | Gorai.005G195000.1 | . |
| .                  | Gorai.008G156900.1 | Gorai.012G124500.1 | .                  | . |
| Vv14g1111          | .                  | .                  | .                  | . |
| .                  | .                  | .                  | .                  | . |
| .                  | .                  | .                  | .                  | . |
| Vv14g1112          | .                  | .                  | .                  | . |
| .                  | .                  | .                  | .                  | . |
| .                  | .                  | .                  | .                  | . |
| Vv14g1113          | .                  | .                  | .                  | . |
| .                  | .                  | .                  | .                  | . |
| .                  | .                  | .                  | .                  | . |
| Vv14g1114          | .                  | .                  | .                  | . |
| .                  | .                  | .                  | .                  | . |
| .                  | .                  | .                  | .                  | . |
| Vv14g1115          | .                  | .                  | Gorai.             | . |
| 012G084100.1       | .                  | .                  | .                  | . |
| .                  | .                  | .                  | .                  | . |
| Vv14g1116          | .                  | .                  | .                  | . |
| Vv17g0084          | Tc03_g015350       | .                  | .                  | . |
| .                  | .                  | .                  | .                  | . |
| Vv14g1117          | .                  | .                  | .                  | . |
| .                  | .                  | .                  | .                  | . |
| .                  | .                  | .                  | .                  | . |
| Vv14g1118          | .                  | Gorai.007G043600.1 | .                  | . |
| .                  | Vv17g0086          | Tc03_g015330       | Gorai.001G056300.1 | . |
| .                  | Gorai.008G208100.1 | Gorai.006G272400.1 | .                  | . |
| .                  | .                  | .                  | .                  | . |
| Vv14g1119          | .                  | Gorai.007G071700.1 | .                  | . |
| Gorai.006G044200.1 | .                  | .                  | .                  | . |
| .                  | Vv01g1205          | .                  | .                  | . |
| .                  | .                  | .                  | .                  | . |
| Vv14g1120          | .                  | .                  | .                  | . |
| .                  | .                  | .                  | .                  | . |
| .                  | .                  | .                  | .                  | . |
| Vv14g1121          | Tc04_g029970       | .                  | .                  | . |
| .                  | .                  | .                  | .                  | . |
| .                  | .                  | .                  | .                  | . |
| Vv14g1122          | .                  | Gorai.007G068800.1 | .                  | . |
| Gorai.006G043900.1 | Gorai.012G084400.1 | Vv17g0088          | .                  | . |
| Tc03_g015290       | Gorai.001G056500.1 | .                  | .                  | . |
| Vv01g1200          | .                  | .                  | .                  | . |
| Vv14g1123          | .                  | .                  | .                  | . |
| .                  | .                  | .                  | .                  | . |
| .                  | .                  | .                  | .                  | . |
| Vv14g1124          | Gorai.011G086900.1 | Gorai.001G273300.1 | .                  | . |

|                    |                    |                    |           |
|--------------------|--------------------|--------------------|-----------|
| .                  | Gorai.006G043800.1 | Gorai.012G084600.1 | .         |
| .                  | .                  | .                  | .         |
| .                  | .                  | .                  | .         |
| Vv14g1125          | .                  | .                  | .         |
| .                  | .                  | .                  | .         |
| Vv14g1126          | .                  | .                  | .         |
| .                  | .                  | .                  | .         |
| Vv14g1127          | Gorai.011G086700.1 | .                  | .         |
| .                  | .                  | .                  | .         |
| Vv14g1128          | Gorai.011G086600.1 | .                  | .         |
| Gorai.012G084800.1 | .                  | .                  | .         |
| .                  | .                  | .                  | .         |
| Vv14g1129          | Tc05_g016970       | Gorai.011G086500.1 | .         |
| .                  | .                  | .                  | .         |
| .                  | .                  | .                  | .         |
| Vv14g1130          | Gorai.012G085000.1 | Gorai.001G273200.1 | .         |
| .                  | .                  | .                  | .         |
| .                  | .                  | .                  | .         |
| Vv14g1131          | .                  | .                  | .         |
| .                  | .                  | .                  | .         |
| .                  | .                  | .                  | .         |
| Vv14g1132          | Tc04_g029800       | .                  | .         |
| .                  | .                  | .                  | .         |
| Vv1rg0354          | .                  | .                  | .         |
| Vv14g1133          | .                  | .                  | .         |
| .                  | .                  | .                  | .         |
| .                  | .                  | .                  | .         |
| Vv14g1134          | .                  | Gorai.007G043500.1 | .         |
| .                  | .                  | .                  | .         |
| Vv1rg0357          | .                  | .                  | .         |
| Vv14g1135          | .                  | .                  | .         |
| .                  | .                  | .                  | .         |
| .                  | .                  | .                  | .         |
| Vv14g1136          | Tc05_g017170       | .                  | .         |
| .                  | .                  | .                  | .         |
| Vv1rg0360          | .                  | .                  | .         |
| Vv14g1137          | Tc04_g004290       | Gorai.001G272800.1 | .         |
| Gorai.007G043300.1 | .                  | Gorai.012G086000.1 | Vv17g0107 |
| Tc03_g015050       | Gorai.001G057900.1 | .                  | .         |
| .                  | Vv1rg0365          | .                  | .         |
| .                  | .                  | .                  | .         |
| Vv14g1138          | Tc04_g004280       | .                  | Gorai.    |
| 006G043700.1       | .                  | .                  | .         |
| .                  | Vv1rg0366          | .                  | .         |
| .                  | .                  | .                  | .         |
| .                  | .                  | .                  | .         |

|                    |                    |                    |                    |   |                    |   |   |
|--------------------|--------------------|--------------------|--------------------|---|--------------------|---|---|
| Vv14g1139          | .                  | .                  | .                  | . | .                  | . | . |
| .                  | .                  | .                  | .                  | . | .                  | . | . |
| Vv14g1140          | .                  | .                  | .                  | . | .                  | . | . |
| .                  | .                  | .                  | .                  | . | .                  | . | . |
| Vv14g1141          | .                  | .                  | Gorai.001G272600.1 | . | .                  | . | . |
| .                  | .                  | .                  | .                  | . | .                  | . | . |
| Vv14g1142          | Tc05_g007270       | .                  | .                  | . | Gorai.             | . | . |
| 006G042600.1       | Gorai.012G086100.1 | .                  | .                  | . | .                  | . | . |
| .                  | .                  | .                  | .                  | . | .                  | . | . |
| Vv14g1143          | .                  | .                  | .                  | . | .                  | . | . |
| .                  | .                  | .                  | .                  | . | .                  | . | . |
| Vv14g1144          | .                  | .                  | .                  | . | .                  | . | . |
| .                  | .                  | .                  | .                  | . | .                  | . | . |
| Vv14g1145          | Tc05_g007230       | .                  | Gorai.001G272000.1 | . | .                  | . | . |
| Gorai.006G042500.1 | .                  | .                  | .                  | . | .                  | . | . |
| .                  | .                  | .                  | .                  | . | .                  | . | . |
| Vv14g1146          | .                  | .                  | .                  | . | .                  | . | . |
| .                  | .                  | .                  | .                  | . | .                  | . | . |
| Vv14g1147          | Tc04_g016340       | .                  | .                  | . | .                  | . | . |
| .                  | .                  | .                  | .                  | . | .                  | . | . |
| Vv14g1148          | .                  | .                  | Gorai.001G271700.1 | . | .                  | . | . |
| .                  | .                  | .                  | .                  | . | .                  | . | . |
| Vv14g1149          | .                  | Gorai.011G086200.1 | Gorai.001G271600.1 | . | .                  | . | . |
| .                  | .                  | Gorai.012G086400.1 | .                  | . | .                  | . | . |
| .                  | .                  | .                  | .                  | . | .                  | . | . |
| Vv14g1150          | .                  | .                  | .                  | . | .                  | . | . |
| .                  | .                  | .                  | .                  | . | .                  | . | . |
| Vv14g1151          | .                  | .                  | .                  | . | Gorai.006G042400.1 | . | . |
| .                  | .                  | .                  | .                  | . | .                  | . | . |
| Vv14g1152          | Tc05_g002060       | .                  | .                  | . | .                  | . | . |
| Vv17g0116          | .                  | .                  | .                  | . | .                  | . | . |
| .                  | .                  | .                  | .                  | . | .                  | . | . |
| Vv14g1153          | .                  | .                  | Gorai.007G042800.1 | . | .                  | . | . |
| .                  | .                  | .                  | .                  | . | .                  | . | . |
| Vv1rg0387          | .                  | .                  | .                  | . | .                  | . | . |
| Vv14g1154          | .                  | .                  | .                  | . | .                  | . | . |
| .                  | .                  | .                  | .                  | . | .                  | . | . |

|                    |              |                    |                    |                    |                    |
|--------------------|--------------|--------------------|--------------------|--------------------|--------------------|
| Vv14g1155          | .            | .                  | .                  | .                  | Gorai.006G042300.1 |
| .                  | .            | .                  | .                  | .                  | .                  |
| Vv14g1156          | .            | Gorai.011G086100.1 | .                  | Gorai.001G271500.1 | .                  |
| .                  | .            | .                  | .                  | .                  | .                  |
| .                  | .            | .                  | .                  | .                  | .                  |
| Vv14g1157          | .            | .                  | .                  | .                  | Gorai.             |
| 012G086500.1       | .            | .                  | .                  | .                  | .                  |
| .                  | .            | .                  | .                  | .                  | .                  |
| Vv14g1158          | .            | .                  | .                  | .                  | Gorai.006G042000.1 |
| .                  | .            | .                  | .                  | .                  | .                  |
| .                  | .            | .                  | .                  | .                  | .                  |
| Vv14g1159          | .            | Gorai.011G085900.1 | .                  | .                  | .                  |
| Gorai.006G041900.1 | .            | Gorai.012G086800.1 | .                  | .                  | .                  |
| .                  | .            | .                  | .                  | .                  | .                  |
| .                  | .            | .                  | .                  | .                  | .                  |
| Vv14g1160          | .            | .                  | Gorai.001G271300.1 | .                  | Gorai.             |
| 007G039800.1       | .            | Gorai.012G086900.1 | .                  | .                  | .                  |
| .                  | .            | .                  | .                  | .                  | .                  |
| .                  | .            | .                  | .                  | .                  | .                  |
| Vv14g1161          | .            | .                  | .                  | .                  | .                  |
| .                  | .            | .                  | .                  | .                  | .                  |
| .                  | .            | .                  | .                  | .                  | .                  |
| Vv14g1162          | .            | .                  | .                  | .                  | .                  |
| .                  | .            | .                  | .                  | .                  | .                  |
| .                  | .            | .                  | .                  | .                  | .                  |
| Vv14g1163          | .            | .                  | Gorai.001G271200.1 | .                  | .                  |
| Gorai.012G087000.1 | .            | .                  | .                  | .                  | .                  |
| .                  | .            | .                  | .                  | .                  | .                  |
| .                  | .            | .                  | .                  | .                  | .                  |
| Vv14g1164          | .            | .                  | Gorai.001G271100.1 | .                  | .                  |
| .                  | .            | .                  | .                  | .                  | .                  |
| .                  | .            | .                  | .                  | .                  | .                  |
| Vv14g1165          | Tc05_g007150 | .                  | .                  | .                  | .                  |
| .                  | .            | .                  | .                  | .                  | .                  |
| .                  | .            | .                  | .                  | .                  | .                  |
| Vv14g1166          | .            | .                  | .                  | .                  | Gorai.006G041700.1 |
| .                  | .            | .                  | .                  | .                  | .                  |
| .                  | .            | .                  | .                  | .                  | .                  |
| Vv14g1167          | .            | .                  | Gorai.001G270800.1 | .                  | .                  |
| .                  | .            | .                  | .                  | .                  | .                  |
| .                  | .            | .                  | .                  | .                  | .                  |
| Vv14g1168          | .            | .                  | .                  | .                  | .                  |
| .                  | .            | .                  | .                  | .                  | .                  |
| .                  | .            | .                  | .                  | .                  | .                  |
| Vv14g1169          | Tc05_g006740 | .                  | .                  | .                  | .                  |
| .                  | .            | .                  | .                  | .                  | .                  |
| .                  | .            | .                  | .                  | .                  | .                  |

|              |                    |                    |                    |                    |                    |   |   |   |
|--------------|--------------------|--------------------|--------------------|--------------------|--------------------|---|---|---|
| Vv14g1170    | .                  | .                  | .                  | .                  | Gorai.006G041500.1 | . | . | . |
| .            | .                  | .                  | .                  | .                  | .                  | . | . | . |
| Vv14g1171    | .                  | Gorai.011G084300.1 | .                  | .                  | Gorai.001G270700.1 | . | . | . |
| .            | Gorai.006G041400.1 | .                  | .                  | .                  | Vv17g0133          | . | . | . |
| Tc03_g014740 | .                  | .                  | .                  | Gorai.008G205600.1 | .                  | . | . | . |
| .            | .                  | .                  | .                  | .                  | .                  | . | . | . |
| Vv14g1172    | .                  | .                  | Gorai.001G270600.1 | .                  | .                  | . | . | . |
| .            | Gorai.012G087300.1 | .                  | .                  | .                  | .                  | . | . | . |
| .            | .                  | Vv1rg0424          | .                  | .                  | .                  | . | . | . |
| .            | .                  | .                  | .                  | .                  | .                  | . | . | . |
| Vv14g1173    | .                  | .                  | .                  | .                  | Gorai.006G041200.1 | . | . | . |
| .            | Gorai.012G087400.1 | .                  | .                  | .                  | .                  | . | . | . |
| .            | .                  | .                  | .                  | .                  | .                  | . | . | . |
| .            | .                  | .                  | .                  | .                  | .                  | . | . | . |
| Vv14g1174    | .                  | .                  | .                  | .                  | .                  | . | . | . |
| .            | .                  | .                  | .                  | .                  | .                  | . | . | . |
| .            | .                  | .                  | .                  | .                  | .                  | . | . | . |
| Vv14g1175    | .                  | .                  | Gorai.001G270200.1 | .                  | .                  | . | . | . |
| .            | Gorai.012G087500.1 | .                  | .                  | .                  | .                  | . | . | . |
| .            | .                  | .                  | .                  | .                  | .                  | . | . | . |
| .            | .                  | .                  | .                  | .                  | .                  | . | . | . |
| Vv14g1176    | .                  | Gorai.011G091800.1 | .                  | .                  | .                  | . | . | . |
| .            | .                  | .                  | .                  | .                  | .                  | . | . | . |
| .            | .                  | .                  | .                  | .                  | .                  | . | . | . |
| Vv14g1177    | Tc04_g016210       | .                  | .                  | .                  | .                  | . | . | . |
| .            | .                  | .                  | .                  | .                  | .                  | . | . | . |
| .            | .                  | .                  | .                  | .                  | .                  | . | . | . |
| Vv14g1178    | Tc05_g002040       | .                  | .                  | .                  | .                  | . | . | . |
| .            | .                  | .                  | .                  | .                  | .                  | . | . | . |
| .            | .                  | .                  | .                  | .                  | .                  | . | . | . |
| Vv14g1179    | .                  | .                  | .                  | .                  | .                  | . | . | . |
| .            | .                  | .                  | .                  | .                  | .                  | . | . | . |
| .            | .                  | .                  | .                  | .                  | .                  | . | . | . |
| Vv14g1180    | Tc05_g002020       | .                  | .                  | .                  | .                  | . | . | . |
| .            | .                  | .                  | .                  | .                  | .                  | . | . | . |
| .            | .                  | .                  | .                  | .                  | .                  | . | . | . |
| Vv14g1181    | .                  | .                  | .                  | .                  | .                  | . | . | . |
| .            | .                  | .                  | .                  | .                  | .                  | . | . | . |
| .            | .                  | .                  | .                  | .                  | .                  | . | . | . |
| Vv14g1182    | .                  | .                  | .                  | .                  | .                  | . | . | . |
| .            | .                  | .                  | .                  | .                  | .                  | . | . | . |
| .            | .                  | .                  | .                  | .                  | .                  | . | . | . |
| Vv14g1183    | .                  | .                  | .                  | .                  | .                  | . | . | . |
| .            | .                  | .                  | .                  | .                  | .                  | . | . | . |
| .            | .                  | .                  | .                  | .                  | .                  | . | . | . |
| Vv14g1184    | .                  | .                  | .                  | .                  | .                  | . | . | . |
| .            | .                  | .                  | .                  | .                  | .                  | . | . | . |
| .            | .                  | .                  | .                  | .                  | .                  | . | . | . |
| Vv14g1185    | .                  | .                  | .                  | .                  | .                  | . | . | . |

|                    |                    |   |                    |                    |   |   |   |
|--------------------|--------------------|---|--------------------|--------------------|---|---|---|
| .                  | .                  | . | .                  | .                  | . | . | . |
| .                  | .                  | . | .                  | .                  | . | . | . |
| Vv14g1186          | Tc04_g003440       | . | .                  | .                  | . | . | . |
| .                  | .                  | . | .                  | .                  | . | . | . |
| Vv14g1187          | .                  | . | .                  | .                  | . | . | . |
| .                  | .                  | . | .                  | .                  | . | . | . |
| Vv14g1188          | .                  | . | .                  | .                  | . | . | . |
| .                  | .                  | . | .                  | .                  | . | . | . |
| Vv14g1189          | Tc04_g003430       | . | .                  | .                  | . | . | . |
| .                  | .                  | . | .                  | .                  | . | . | . |
| Vv14g1190          | .                  | . | .                  | .                  | . | . | . |
| .                  | .                  | . | .                  | .                  | . | . | . |
| Vv14g1191          | Tc04_g003390       | . | .                  | .                  | . | . | . |
| .                  | .                  | . | .                  | .                  | . | . | . |
| Vv14g1192          | .                  | . | .                  | .                  | . | . | . |
| .                  | .                  | . | .                  | .                  | . | . | . |
| Vv14g1193          | .                  | . | .                  | .                  | . | . | . |
| .                  | .                  | . | .                  | .                  | . | . | . |
| Vv14g1194          | .                  | . | .                  | .                  | . | . | . |
| .                  | .                  | . | .                  | .                  | . | . | . |
| Vv14g1195          | .                  | . | .                  | .                  | . | . | . |
| .                  | .                  | . | .                  | .                  | . | . | . |
| Vv14g1196          | .                  | . | .                  | .                  | . | . | . |
| .                  | .                  | . | .                  | .                  | . | . | . |
| Vv14g1197          | .                  | . | .                  | .                  | . | . | . |
| .                  | .                  | . | .                  | .                  | . | . | . |
| Vv14g1198          | .                  | . | .                  | .                  | . | . | . |
| Vv17g0141          | Tc03_g014680       | . | .                  | .                  | . | . | . |
| .                  | .                  | . | .                  | .                  | . | . | . |
| Vv14g1199          | Gorai.011G091700.1 | . | .                  | Gorai.001G270100.1 | . | . | . |
| .                  | Gorai.006G041100.1 | . | .                  | Vv17g0144          | . | . | . |
| .                  | .                  | . | .                  | .                  | . | . | . |
| Vv14g1200          | .                  | . | Gorai.001G270000.1 | .                  | . | . | . |
| .                  | .                  | . | .                  | .                  | . | . | . |
| Vv14g1201          | Gorai.011G091500.1 | . | .                  | .                  | . | . | . |
| Gorai.006G041000.1 | .                  | . | .                  | .                  | . | . | . |

|                    |                    |                    |                    |                    |   |   |   |
|--------------------|--------------------|--------------------|--------------------|--------------------|---|---|---|
| .                  | .                  | .                  | .                  | .                  | . | . | . |
| .                  | .                  | .                  | .                  | .                  | . | . | . |
| Vv14g1202          | .                  | .                  | Gorai.001G269900.1 | .                  | . | . | . |
| Gorai.006G040600.1 | .                  | Gorai.012G087600.1 | .                  | .                  | . | . | . |
| .                  | .                  | .                  | .                  | .                  | . | . | . |
| .                  | .                  | .                  | .                  | .                  | . | . | . |
| Vv14g1203          | .                  | .                  | .                  | .                  | . | . | . |
| .                  | .                  | .                  | .                  | .                  | . | . | . |
| .                  | .                  | .                  | .                  | .                  | . | . | . |
| Vv14g1204          | .                  | Gorai.011G091900.1 | .                  | Gorai.001G269600.1 | . | . | . |
| .                  | .                  | .                  | .                  | .                  | . | . | . |
| .                  | .                  | .                  | .                  | .                  | . | . | . |
| .                  | .                  | .                  | .                  | .                  | . | . | . |
| Vv14g1205          | Tc04_g015880       | .                  | .                  | .                  | . | . | . |
| .                  | .                  | .                  | .                  | .                  | . | . | . |
| .                  | .                  | .                  | .                  | .                  | . | . | . |
| Vv14g1206          | Tc04_g015760       | .                  | Gorai.001G269500.1 | .                  | . | . | . |
| .                  | Gorai.012G087800.1 | .                  | .                  | .                  | . | . | . |
| .                  | .                  | .                  | .                  | .                  | . | . | . |
| .                  | .                  | .                  | .                  | .                  | . | . | . |
| Vv14g1207          | Tc04_g002990       | .                  | Gorai.001G269400.1 | .                  | . | . | . |
| .                  | Gorai.012G088300.1 | .                  | Vv17g0150          | .                  | . | . | . |
| .                  | .                  | .                  | .                  | .                  | . | . | . |
| .                  | .                  | .                  | .                  | .                  | . | . | . |
| Vv14g1208          | Tc04_g002980       | Gorai.011G092300.1 | .                  | Gorai.             | . | . | . |
| 001G269300.1       | .                  | .                  | .                  | .                  | . | . | . |
| .                  | .                  | Vv1rg0244          | .                  | .                  | . | . | . |
| .                  | .                  | .                  | .                  | .                  | . | . | . |
| Vv14g1209          | Tc04_g002970       | .                  | Gorai.001G269200.1 | .                  | . | . | . |
| .                  | Gorai.012G088400.1 | .                  | .                  | .                  | . | . | . |
| .                  | .                  | .                  | .                  | .                  | . | . | . |
| .                  | .                  | .                  | .                  | .                  | . | . | . |
| Vv14g1210          | Tc04_g002950       | .                  | .                  | .                  | . | . | . |
| Gorai.012G088600.1 | .                  | .                  | .                  | .                  | . | . | . |
| .                  | .                  | .                  | .                  | .                  | . | . | . |
| .                  | .                  | .                  | .                  | .                  | . | . | . |
| Vv14g1211          | .                  | .                  | .                  | .                  | . | . | . |
| .                  | .                  | .                  | .                  | .                  | . | . | . |
| .                  | .                  | .                  | .                  | .                  | . | . | . |
| Vv14g1212          | Tc04_g002940       | .                  | .                  | Gorai.             | . | . | . |
| 006G040200.1       | Gorai.012G088700.1 | .                  | .                  | .                  | . | . | . |
| .                  | .                  | .                  | .                  | .                  | . | . | . |
| .                  | .                  | .                  | .                  | .                  | . | . | . |
| Vv14g1213          | .                  | .                  | .                  | .                  | . | . | . |
| .                  | .                  | .                  | .                  | .                  | . | . | . |
| .                  | .                  | .                  | .                  | .                  | . | . | . |
| Vv14g1214          | .                  | .                  | .                  | .                  | . | . | . |
| .                  | .                  | .                  | .                  | .                  | . | . | . |
| .                  | .                  | .                  | .                  | .                  | . | . | . |
| Vv14g1215          | .                  | .                  | .                  | .                  | . | . | . |
| .                  | .                  | .                  | .                  | .                  | . | . | . |

|                    |                    |                    |   |                    |   |        |   |
|--------------------|--------------------|--------------------|---|--------------------|---|--------|---|
| Vv14g1216          | .                  | .                  | . | .                  | . | .      | . |
| .                  | .                  | .                  | . | .                  | . | .      | . |
| Vv14g1217          | Tc04_g002920       | .                  | . | .                  | . | .      | . |
| .                  | .                  | .                  | . | .                  | . | .      | . |
| Vv14g1218          | Tc04_g002880       | .                  | . | .                  | . | Gorai. | . |
| 006G040100.1       | Gorai.012G088800.1 | .                  | . | .                  | . | .      | . |
| .                  | .                  | .                  | . | .                  | . | .      | . |
| Vv14g1219          | Tc04_g002870       | Gorai.011G092400.1 | . | .                  | . | .      | . |
| Gorai.006G040000.1 | Gorai.012G088900.1 | .                  | . | .                  | . | .      | . |
| .                  | .                  | .                  | . | .                  | . | .      | . |
| Vv14g1220          | Tc04_g002860       | .                  | . | .                  | . | Gorai. | . |
| 006G039900.1       | .                  | .                  | . | .                  | . | .      | . |
| .                  | .                  | .                  | . | .                  | . | .      | . |
| Vv14g1221          | Tc04_g002850       | .                  | . | .                  | . | .      | . |
| .                  | .                  | .                  | . | .                  | . | .      | . |
| Vv1rg0253          | .                  | .                  | . | .                  | . | .      | . |
| Vv14g1222          | .                  | .                  | . | .                  | . | .      | . |
| Vv17g0163          | Tc03_g014500       | Gorai.001G060700.1 | . | .                  | . | .      | . |
| Gorai.008G202600.1 | Gorai.006G271000.1 | .                  | . | .                  | . | .      | . |
| .                  | .                  | .                  | . | .                  | . | .      | . |
| Vv14g1223          | Tc04_g002840       | .                  | . | Gorai.007G073800.1 | . | .      | . |
| .                  | Gorai.012G089000.1 | .                  | . | .                  | . | .      | . |
| .                  | .                  | .                  | . | .                  | . | .      | . |
| Vv14g1224          | Tc04_g002830       | .                  | . | .                  | . | Gorai. | . |
| 006G039800.1       | Gorai.012G089100.1 | .                  | . | .                  | . | .      | . |
| .                  | .                  | .                  | . | .                  | . | .      | . |
| Vv14g1225          | Tc04_g002820       | Gorai.011G092500.1 | . | .                  | . | .      | . |
| Gorai.006G039700.1 | .                  | .                  | . | .                  | . | .      | . |
| .                  | .                  | .                  | . | .                  | . | .      | . |
| Vv14g1226          | .                  | .                  | . | .                  | . | .      | . |
| .                  | .                  | .                  | . | .                  | . | .      | . |
| Vv14g1227          | Tc04_g002810       | Gorai.011G092600.1 | . | .                  | . | .      | . |
| Gorai.006G039500.1 | .                  | Vv17g0167          | . | .                  | . | .      | . |
| Tc03_g014450       | Gorai.001G061000.1 | .                  | . | .                  | . | .      | . |
| Gorai.006G268000.1 | .                  | .                  | . | .                  | . | .      | . |
| .                  | .                  | .                  | . | .                  | . | .      | . |
| Vv14g1228          | .                  | .                  | . | .                  | . | .      | . |
| .                  | .                  | .                  | . | .                  | . | .      | . |
| Vv14g1229          | .                  | .                  | . | .                  | . | .      | . |
| .                  | .                  | .                  | . | .                  | . | .      | . |



|                    |                    |                    |                    |        |
|--------------------|--------------------|--------------------|--------------------|--------|
| Vv14g1230          | Tc04_g002790       | .                  | Gorai.001G268800.1 | .      |
|                    | Gorai.006G039400.1 | .                  | Vv17g0168          | .      |
| Tc03_g014440       | .                  | .                  | .                  | .      |
| Vv14g1231          | Tc04_g002780       | .                  | .                  | Gorai. |
| 006G039300.1       | Vv1rg0258          | .                  | .                  | .      |
| .                  | .                  | .                  | .                  | .      |
| Vv14g1232          | Tc04_g002770       | .                  | Gorai.001G268600.1 | .      |
|                    | Gorai.006G039200.1 | Gorai.012G089200.1 | Vv1rg0261          | .      |
| .                  | .                  | .                  | .                  | .      |
| Vv14g1233          | .                  | .                  | .                  | .      |
| .                  | .                  | .                  | .                  | .      |
| Vv14g1234          | Tc04_g002750       | .                  | Gorai.007G073900.1 | .      |
| .                  | Gorai.012G089300.1 | .                  | .                  | .      |
| .                  | .                  | .                  | .                  | .      |
| Vv14g1235          | .                  | .                  | .                  | .      |
| .                  | .                  | .                  | .                  | .      |
| Vv14g1236          | Tc04_g002710       | Gorai.011G092900.1 | .                  | .      |
|                    | Gorai.006G039000.1 | Gorai.012G067800.1 | .                  | .      |
| .                  | .                  | .                  | .                  | .      |
| Vv14g1237          | Tc04_g002700       | Gorai.011G088800.1 | Gorai.             | .      |
| 001G268500.1       | Gorai.007G074000.1 | Gorai.006G038900.1 | .                  | .      |
| Gorai.012G089500.1 | Vv17g1164          | Tc03_g014400       | .                  | .      |
|                    | Gorai.007G041900.1 | Vv1rg0282          | .                  | .      |
| .                  | .                  | .                  | .                  | .      |
| Vv14g1238          | Tc04_g002690       | .                  | .                  | .      |
|                    | Vv17g1162          | .                  | .                  | .      |
|                    | Vv1rg0286          | .                  | .                  | .      |
| Vv14g1239          | .                  | .                  | Gorai.006G038800.1 | .      |
| .                  | .                  | .                  | .                  | .      |
| Vv14g1240          | Tc04_g002680       | Gorai.011G085900.1 | Gorai.             | .      |
| 001G268400.1       | .                  | Gorai.012G089600.1 | .                  | .      |
| .                  | .                  | Vv1rg0289          | .                  | .      |
| .                  | .                  | .                  | .                  | .      |
| Vv14g1241          | Tc04_g002670       | .                  | Gorai.001G268300.1 | .      |
|                    | Gorai.006G038700.1 | Gorai.012G089700.1 | .                  | .      |
| .                  | .                  | .                  | .                  | .      |
| Vv14g1242          | Tc04_g002660       | Gorai.011G093000.1 | .                  | .      |
| .                  | Gorai.012G089800.1 | .                  | .                  | .      |
| .                  | .                  | .                  | .                  | .      |
| .                  | .                  | .                  | .                  | .      |

|                    |                    |                    |                    |
|--------------------|--------------------|--------------------|--------------------|
| Vv14g1243          | Tc04_g002650       | Gorai.011G093100.1 | .                  |
| Gorai.007G074100.1 | Gorai.006G038600.1 | .                  | .                  |
| .                  | .                  | .                  | .                  |
| .                  | .                  | .                  | .                  |
| Vv14g1244          | Tc04_g002640       | Gorai.001G268200.1 | .                  |
| Gorai.007G074200.1 | Gorai.006G038500.1 | .                  | .                  |
| .                  | .                  | Vv1rg0292          | .                  |
| .                  | .                  | .                  | .                  |
| Vv14g1245          | Tc04_g002630       | Gorai.011G093200.1 | Gorai.             |
| 001G268100.1       | Gorai.007G074300.1 | Gorai.006G038400.1 | .                  |
| .                  | .                  | .                  | .                  |
| Vv1rg0301          | .                  | .                  | .                  |
| Vv14g1246          | Tc04_g002610       | Gorai.007G074400.1 | .                  |
| Gorai.006G037700.1 | .                  | .                  | .                  |
| .                  | .                  | .                  | .                  |
| .                  | .                  | .                  | .                  |
| Vv14g1247          | .                  | Gorai.006G037600.1 | .                  |
| .                  | .                  | .                  | .                  |
| .                  | .                  | .                  | .                  |
| Vv14g1248          | .                  | .                  | .                  |
| .                  | .                  | .                  | .                  |
| .                  | .                  | .                  | .                  |
| Vv14g1249          | .                  | Gorai.001G267900.1 | .                  |
| .                  | .                  | .                  | .                  |
| .                  | .                  | .                  | .                  |
| Vv14g1250          | .                  | .                  | Gorai.             |
| 012G090700.1       | Vv17g1141          | Tc03_g014190       | Gorai.001G061600.1 |
| .                  | .                  | .                  | .                  |
| .                  | .                  | .                  | .                  |
| Vv14g1251          | .                  | .                  | .                  |
| .                  | .                  | .                  | .                  |
| .                  | .                  | .                  | .                  |
| Vv14g1252          | .                  | .                  | .                  |
| .                  | .                  | .                  | .                  |
| .                  | .                  | .                  | .                  |
| Vv14g1253          | .                  | Gorai.001G267700.1 | .                  |
| Gorai.006G037200.1 | .                  | .                  | .                  |
| .                  | .                  | .                  | .                  |
| .                  | .                  | .                  | .                  |
| Vv14g1254          | Tc04_g002530       | Gorai.001G267600.1 | .                  |
| Gorai.007G074700.1 | .                  | .                  | .                  |
| .                  | .                  | Vv1rg0302          | .                  |
| .                  | .                  | .                  | .                  |
| Vv14g1255          | .                  | Gorai.006G037100.1 | .                  |
| .                  | .                  | .                  | .                  |
| .                  | .                  | .                  | .                  |
| Vv14g1256          | .                  | Gorai.007G074900.1 | .                  |
| Gorai.006G037000.1 | Gorai.012G091100.1 | .                  | .                  |
| .                  | .                  | .                  | .                  |
| .                  | .                  | .                  | .                  |

|                    |                    |                    |                    |                    |                    |        |   |
|--------------------|--------------------|--------------------|--------------------|--------------------|--------------------|--------|---|
| Vv14g1257          | .                  | .                  | .                  | .                  | .                  | .      | . |
| .                  | .                  | .                  | .                  | .                  | .                  | .      | . |
| Vv14g1258          | .                  | .                  | .                  | Gorai.007G075000.1 | .                  | .      | . |
| .                  | .                  | .                  | .                  | .                  | .                  | .      | . |
| Vv14g1259          | .                  | .                  | .                  | .                  | .                  | Gorai. | . |
| 012G091200.1       | .                  | .                  | .                  | .                  | .                  | .      | . |
| .                  | .                  | .                  | .                  | .                  | .                  | .      | . |
| Vv14g1260          | .                  | .                  | Gorai.001G267500.1 | .                  | .                  | .      | . |
| Gorai.012G091400.1 | .                  | .                  | .                  | .                  | .                  | .      | . |
| .                  | .                  | .                  | .                  | .                  | .                  | .      | . |
| .                  | .                  | .                  | .                  | .                  | .                  | .      | . |
| Vv14g1261          | .                  | .                  | .                  | .                  | .                  | .      | . |
| Vv17g1118          | Tc03_g014120       | .                  | .                  | .                  | .                  | Gorai. | . |
| 008G204500.1       | Gorai.006G270200.1 | .                  | .                  | .                  | .                  | .      | . |
| .                  | .                  | .                  | .                  | .                  | .                  | .      | . |
| Vv14g1262          | .                  | .                  | .                  | .                  | Gorai.006G036900.1 | .      | . |
| .                  | Vv17g1117          | Tc03_g014110       | Gorai.001G061800.1 | .                  | .                  | .      | . |
| .                  | Gorai.007G041600.1 | Gorai.008G204400.1 | .                  | .                  | .                  | .      | . |
| .                  | .                  | .                  | .                  | .                  | .                  | .      | . |
| Vv14g1263          | .                  | .                  | .                  | .                  | .                  | .      | . |
| .                  | .                  | .                  | .                  | .                  | .                  | .      | . |
| .                  | .                  | .                  | .                  | .                  | .                  | .      | . |
| Vv14g1264          | Tc04_g002380       | .                  | .                  | .                  | .                  | Gorai. | . |
| 006G036800.1       | Gorai.012G091500.1 | .                  | .                  | .                  | .                  | .      | . |
| .                  | .                  | .                  | .                  | .                  | .                  | .      | . |
| .                  | .                  | .                  | .                  | .                  | .                  | .      | . |
| Vv14g1265          | Tc04_g002370       | .                  | .                  | .                  | .                  | .      | . |
| .                  | .                  | .                  | .                  | .                  | .                  | .      | . |
| .                  | .                  | .                  | .                  | .                  | .                  | .      | . |
| Vv14g1266          | Tc04_g002360       | .                  | Gorai.001G267400.1 | .                  | .                  | .      | . |
| Gorai.006G036700.1 | .                  | .                  | .                  | .                  | .                  | .      | . |
| .                  | .                  | .                  | .                  | .                  | .                  | .      | . |
| .                  | .                  | .                  | .                  | .                  | .                  | .      | . |
| Vv14g1267          | Tc04_g002330       | .                  | .                  | .                  | .                  | Gorai. | . |
| 006G036400.1       | .                  | .                  | .                  | .                  | .                  | .      | . |
| .                  | .                  | .                  | .                  | .                  | .                  | .      | . |
| Vv14g1268          | Tc04_g002320       | .                  | Gorai.001G267300.1 | .                  | .                  | .      | . |
| Gorai.006G036300.1 | .                  | .                  | Vv17g1097          | .                  | .                  | .      | . |
| .                  | .                  | .                  | Vv01g0714          | .                  | .                  | .      | . |
| Tc02_g025720       | Gorai.002G189900.1 | .                  | Gorai.005G174600.1 | .                  | .                  | .      | . |
| Gorai.008G162500.1 | .                  | .                  | .                  | .                  | .                  | .      | . |
| Vv14g1269          | Tc04_g002240       | .                  | Gorai.001G267200.1 | .                  | .                  | .      | . |
| .                  | .                  | .                  | .                  | .                  | .                  | .      | . |
| .                  | .                  | .                  | .                  | .                  | .                  | .      | . |
| Vv14g1270          | .                  | .                  | .                  | .                  | .                  | .      | . |
| .                  | .                  | .                  | .                  | .                  | .                  | .      | . |
| .                  | .                  | .                  | .                  | .                  | .                  | .      | . |
| Vv14g1271          | .                  | .                  | .                  | .                  | .                  | .      | . |

|                    |                    |                    |                    |        |           |
|--------------------|--------------------|--------------------|--------------------|--------|-----------|
|                    |                    |                    |                    |        | Vv01g0725 |
|                    | Tc02_g025570       |                    | Gorai.005G175000.1 |        | .         |
| Gorai.008G162000.1 |                    |                    |                    |        |           |
| Vv14g1272          |                    |                    |                    |        |           |
|                    |                    |                    |                    |        |           |
| Vv14g1273          | Tc04_g002230       |                    |                    |        | Gorai.    |
| 006G036200.1       | Gorai.012G066600.1 |                    |                    |        |           |
|                    |                    |                    |                    |        |           |
| Vv14g1274          | Tc04_g002220       |                    |                    |        |           |
| Gorai.012G066500.1 | Vv17g1087          |                    | Tc03_g013920       | Gorai. |           |
| 001G062700.1       |                    |                    | Gorai.006G269800.1 |        |           |
|                    |                    |                    |                    |        |           |
| Vv14g1275          |                    |                    |                    |        |           |
|                    |                    |                    |                    |        |           |
| Vv14g1276          |                    | Gorai.011G093700.1 |                    |        |           |
|                    | Vv17g1083          | Tc03_g013840       |                    |        |           |
| Gorai.007G041500.1 |                    | Vv01g0730          |                    |        |           |
| Tc02_g025410       |                    | Gorai.005G183600.1 |                    |        |           |
| Vv14g1277          |                    |                    |                    | Gorai. |           |
| 012G066400.1       |                    |                    |                    |        |           |
|                    |                    |                    |                    |        |           |
| Vv14g1278          |                    |                    |                    |        |           |
|                    |                    |                    |                    |        |           |
| Vv14g1279          |                    |                    |                    |        |           |
|                    |                    |                    |                    |        | Vv01g0731 |
|                    | Tc02_g025400       |                    | Gorai.005G175200.1 |        |           |
|                    |                    |                    |                    |        |           |
| Vv14g1280          |                    |                    |                    |        |           |
|                    |                    |                    |                    |        |           |
| Vv14g1281          |                    |                    |                    |        | Gorai.    |
| 012G066300.1       |                    |                    |                    |        |           |
|                    | Vv01g0732          |                    | Gorai.005G175300.1 |        |           |
|                    |                    |                    |                    |        |           |
| Vv14g1282          |                    |                    |                    |        |           |
|                    |                    |                    |                    |        |           |
| Vv14g1283          |                    |                    |                    |        |           |
|                    |                    |                    |                    |        |           |
| Vv14g1284          |                    |                    |                    |        |           |
|                    |                    |                    |                    |        |           |
| Vv14g1285          |                    |                    |                    |        | Gorai.    |
| 012G066200.1       |                    |                    |                    |        |           |
|                    |                    |                    |                    |        |           |

|                    |                    |                    |   |        |   |   |
|--------------------|--------------------|--------------------|---|--------|---|---|
| Vv14g1286          | Tc04_g002200       | .                  | . | .      | . | . |
| .                  | .                  | .                  | . | .      | . | . |
| Vv14g1287          | .                  | .                  | . | .      | . | . |
| .                  | .                  | .                  | . | .      | . | . |
| Vv14g1288          | .                  | .                  | . | .      | . | . |
| .                  | .                  | .                  | . | .      | . | . |
| Vv14g1289          | Tc04_g002190       | .                  | . | .      | . | . |
| .                  | .                  | .                  | . | .      | . | . |
| Vv14g1290          | .                  | .                  | . | .      | . | . |
| .                  | .                  | .                  | . | .      | . | . |
| Vv14g1291          | Tc04_g002180       | .                  | . | .      | . | . |
| Gorai.012G066100.1 | .                  | .                  | . | .      | . | . |
| .                  | .                  | .                  | . | .      | . | . |
| Vv14g1292          | Tc04_g002170       | .                  | . | .      | . | . |
| Gorai.012G066000.1 | .                  | .                  | . | .      | . | . |
| .                  | .                  | .                  | . | .      | . | . |
| Vv14g1293          | Tc04_g002150       | .                  | . | .      | . | . |
| Gorai.012G065900.1 | .                  | .                  | . | .      | . | . |
| .                  | .                  | .                  | . | .      | . | . |
| Vv14g1294          | Tc04_g002130       | Gorai.011G093900.1 | . | Gorai. | . | . |
| 001G267000.1       | Gorai.006G035100.1 | .                  | . | .      | . | . |
| .                  | .                  | .                  | . | .      | . | . |
| Vv14g1295          | Tc04_g002100       | Gorai.011G094000.1 | . | .      | . | . |
| Gorai.006G035000.1 | .                  | .                  | . | .      | . | . |
| .                  | .                  | .                  | . | .      | . | . |
| Vv14g1296          | .                  | Gorai.001G266500.1 | . | Gorai. | . | . |
| 007G075200.1       | .                  | .                  | . | .      | . | . |
| .                  | .                  | .                  | . | .      | . | . |
| Vv14g1297          | .                  | .                  | . | .      | . | . |
| .                  | .                  | .                  | . | .      | . | . |
| Vv14g1298          | .                  | .                  | . | .      | . | . |
| Vv17g1043          | Tc03_g002290       | .                  | . | .      | . | . |
| .                  | .                  | .                  | . | .      | . | . |
| Vv14g1299          | .                  | .                  | . | .      | . | . |
| .                  | .                  | .                  | . | .      | . | . |
| Vv14g1300          | Tc04_g002020       | .                  | . | .      | . | . |
| .                  | .                  | .                  | . | .      | . | . |
| Vv14g1301          | Tc04_g002010       | .                  | . | .      | . | . |
| .                  | .                  | .                  | . | .      | . | . |

|                    |                    |                    |                    |              |                    |   |
|--------------------|--------------------|--------------------|--------------------|--------------|--------------------|---|
| Vv14g1302          | .                  | .                  | Gorai.011G094100.1 | .            | .                  | . |
| .                  | .                  | .                  | .                  | .            | .                  | . |
| Vv14g1303          | .                  | .                  | .                  | .            | .                  | . |
| .                  | .                  | .                  | .                  | .            | .                  | . |
| Vv14g1304          | .                  | .                  | .                  | .            | Gorai.             | . |
| 012G065600.1       | .                  | .                  | .                  | .            | .                  | . |
| .                  | .                  | .                  | .                  | .            | .                  | . |
| Vv14g1305          | .                  | .                  | .                  | .            | .                  | . |
| .                  | .                  | .                  | .                  | .            | .                  | . |
| Vv14g1306          | .                  | .                  | .                  | .            | Gorai.006G034900.1 | . |
| .                  | .                  | .                  | .                  | .            | .                  | . |
| Vv01g0737          | .                  | Tc02_g025310       | .                  | .            | Gorai.005G175700.1 | . |
| Gorai.009G335200.1 | .                  | .                  | .                  | .            | .                  | . |
| Vv14g1307          | .                  | .                  | .                  | .            | .                  | . |
| .                  | .                  | .                  | .                  | .            | .                  | . |
| .                  | .                  | .                  | .                  | .            | .                  | . |
| Vv14g1308          | Tc04_g001980       | .                  | Gorai.011G094500.1 | .            | Gorai.             | . |
| 001G266300.1       | .                  | .                  | Gorai.012G065300.1 | .            | .                  | . |
| .                  | .                  | .                  | .                  | .            | .                  | . |
| Tc02_g024980       | .                  | Gorai.005G177400.1 | .                  | Vv01g0774    | Gorai.             | . |
| 008G161300.1       | .                  | .                  | .                  | .            | .                  | . |
| Vv14g1309          | Tc04_g001970       | .                  | .                  | .            | .                  | . |
| Gorai.012G065200.1 | .                  | .                  | .                  | .            | .                  | . |
| .                  | .                  | .                  | .                  | .            | .                  | . |
| Vv14g1310          | .                  | .                  | .                  | .            | .                  | . |
| .                  | .                  | .                  | .                  | .            | .                  | . |
| .                  | .                  | .                  | .                  | .            | .                  | . |
| Vv14g1311          | Tc04_g001960       | .                  | .                  | .            | Gorai.             | . |
| 006G034800.1       | .                  | .                  | .                  | .            | .                  | . |
| .                  | .                  | .                  | .                  | .            | .                  | . |
| Vv14g1312          | Tc04_g001940       | .                  | .                  | .            | Gorai.             | . |
| 006G034700.1       | Gorai.012G065000.1 | .                  | .                  | .            | .                  | . |
| .                  | .                  | .                  | .                  | .            | .                  | . |
| Gorai.002G187800.1 | .                  | .                  | Vv01g0777          | Tc02_g024950 | Gorai.             | . |
| 008G161200.1       | .                  | .                  | Gorai.009G335700.1 | .            | .                  | . |
| Vv14g1313          | Tc04_g001930       | .                  | .                  | .            | .                  | . |
| .                  | .                  | .                  | .                  | .            | .                  | . |
| .                  | .                  | .                  | .                  | .            | .                  | . |
| Vv14g1314          | .                  | .                  | .                  | .            | Gorai.             | . |
| 012G064900.1       | .                  | .                  | .                  | .            | .                  | . |
| .                  | .                  | .                  | .                  | .            | .                  | . |
| Vv14g1315          | Tc04_g001920       | .                  | .                  | .            | Gorai.007G075300.1 | . |
| Gorai.006G034600.1 | .                  | .                  | .                  | .            | .                  | . |
| .                  | .                  | .                  | .                  | .            | .                  | . |
| .                  | .                  | .                  | .                  | .            | .                  | . |
| Vv14g1316          | Tc04_g001910       | .                  | Gorai.001G266100.1 | .            | .                  | . |

|                    |                    |                    |                    |        |   |
|--------------------|--------------------|--------------------|--------------------|--------|---|
|                    | Gorai.006G034500.1 |                    | Gorai.012G064800.1 | .      | . |
| .                  | .                  | .                  | .                  | .      | . |
| .                  | .                  | .                  | .                  | .      | . |
| Vv14g1317          | .                  | .                  | .                  | .      | . |
| .                  | .                  | .                  | .                  | .      | . |
| .                  | .                  | .                  | .                  | .      | . |
| Vv14g1318          | Tc04_g001900       | .                  | .                  | .      | . |
| Gorai.012G064700.1 | .                  | .                  | .                  | .      | . |
| .                  | .                  | .                  | .                  | .      | . |
| Vv14g1319          | .                  | .                  | Gorai.001G266000.1 | .      | . |
| .                  | .                  | .                  | .                  | .      | . |
| .                  | .                  | .                  | .                  | .      | . |
| Vv14g1320          | Tc04_g001880       | .                  | .                  | .      | . |
| Gorai.012G064600.1 | .                  | .                  | .                  | .      | . |
| .                  | .                  | .                  | .                  | .      | . |
| Vv14g1321          | .                  | .                  | .                  | .      | . |
| .                  | .                  | .                  | .                  | .      | . |
| .                  | .                  | .                  | .                  | .      | . |
| Vv14g1322          | .                  | .                  | .                  | .      | . |
| .                  | .                  | .                  | .                  | .      | . |
| .                  | .                  | .                  | .                  | .      | . |
| Vv14g1323          | Tc04_g001790       | .                  | .                  | .      | . |
| .                  | .                  | .                  | .                  | .      | . |
| .                  | .                  | .                  | .                  | .      | . |
| Vv14g1324          | Tc04_g001770       | .                  | Gorai.001G265900.1 | .      | . |
| .                  | .                  | .                  | .                  | .      | . |
| .                  | .                  | .                  | .                  | .      | . |
| Vv14g1325          | Tc04_g001760       | .                  | Gorai.001G265500.1 | .      | . |
| .                  | .                  | .                  | .                  | .      | . |
| .                  | .                  | .                  | .                  | .      | . |
| Vv14g1326          | Tc04_g001750       | .                  | .                  | Gorai. | . |
| 006G034300.1       | Gorai.012G064500.1 | .                  | .                  | .      | . |
| .                  | .                  | .                  | .                  | .      | . |
| .                  | .                  | .                  | .                  | .      | . |
| Vv14g1327          | Tc04_g001740       | Gorai.011G094600.1 | .                  | .      | . |
| Gorai.007G075400.1 | Gorai.006G034200.1 | Gorai.012G064400.1 | .                  | .      | . |
| .                  | .                  | .                  | .                  | .      | . |
| .                  | .                  | .                  | .                  | .      | . |
| Vv14g1328          | Tc04_g001730       | .                  | Gorai.001G265400.1 | .      | . |
| .                  | .                  | .                  | .                  | .      | . |
| .                  | .                  | .                  | .                  | .      | . |
| Vv14g1329          | Tc04_g001720       | .                  | .                  | Gorai. | . |
| 006G034100.1       | .                  | .                  | .                  | .      | . |
| .                  | .                  | .                  | .                  | .      | . |
| Vv14g1330          | Tc04_g001700       | .                  | .                  | Gorai. | . |
| 006G033800.1       | .                  | .                  | .                  | .      | . |
| .                  | .                  | .                  | .                  | .      | . |
| Vv14g1331          | Tc04_g001680       | .                  | .                  | .      | . |
| .                  | .                  | .                  | .                  | .      | . |
| .                  | .                  | .                  | .                  | .      | . |

|                    |                    |                    |                    |                    |                    |   |
|--------------------|--------------------|--------------------|--------------------|--------------------|--------------------|---|
| Vv14g1332          | .                  | .                  | .                  | .                  | Gorai.006G033600.1 | . |
| .                  | .                  | .                  | .                  | .                  | .                  | . |
| Vv14g1333          | .                  | .                  | .                  | .                  | .                  | . |
| Vv17g1017          | .                  | .                  | .                  | .                  | .                  | . |
| .                  | .                  | .                  | .                  | .                  | .                  | . |
| Vv14g1334          | Tc04_g001670       | .                  | .                  | .                  | .                  | . |
| Gorai.012G064300.1 | .                  | .                  | .                  | .                  | .                  | . |
| .                  | .                  | .                  | .                  | .                  | .                  | . |
| Vv14g1335          | Tc04_g001660       | .                  | Gorai.001G265000.1 | .                  | .                  | . |
| .                  | Gorai.012G064200.1 | .                  | .                  | .                  | .                  | . |
| .                  | .                  | .                  | .                  | .                  | .                  | . |
| .                  | .                  | .                  | .                  | .                  | .                  | . |
| Vv14g1336          | Tc04_g001650       | Gorai.011G094700.1 | .                  | .                  | .                  | . |
| Gorai.006G033300.1 | .                  | Gorai.012G064100.1 | .                  | .                  | .                  | . |
| .                  | .                  | .                  | .                  | .                  | .                  | . |
| .                  | .                  | .                  | .                  | .                  | .                  | . |
| Vv14g1337          | .                  | .                  | .                  | .                  | .                  | . |
| .                  | .                  | .                  | .                  | .                  | .                  | . |
| .                  | .                  | .                  | .                  | .                  | .                  | . |
| Vv14g1338          | Tc04_g001640       | .                  | Gorai.001G264900.1 | .                  | .                  | . |
| .                  | Gorai.012G064000.1 | .                  | .                  | .                  | .                  | . |
| .                  | .                  | .                  | .                  | .                  | .                  | . |
| .                  | .                  | .                  | .                  | .                  | .                  | . |
| Vv14g1339          | Tc04_g001620       | .                  | .                  | .                  | .                  | . |
| .                  | .                  | .                  | .                  | .                  | .                  | . |
| .                  | .                  | .                  | .                  | .                  | .                  | . |
| Vv14g1340          | Tc04_g001610       | .                  | Gorai.001G264700.1 | .                  | .                  | . |
| .                  | .                  | .                  | .                  | .                  | .                  | . |
| .                  | .                  | .                  | .                  | .                  | .                  | . |
| Vv14g1341          | Tc04_g001590       | .                  | Gorai.001G264600.1 | .                  | .                  | . |
| Gorai.007G075500.1 | .                  | .                  | .                  | .                  | .                  | . |
| .                  | .                  | .                  | .                  | .                  | .                  | . |
| .                  | .                  | .                  | .                  | .                  | .                  | . |
| Vv14g1342          | Tc04_g001580       | .                  | .                  | Gorai.007G075600.1 | .                  | . |
| .                  | .                  | .                  | .                  | .                  | .                  | . |
| .                  | .                  | .                  | .                  | .                  | .                  | . |
| Vv14g1343          | .                  | .                  | .                  | .                  | .                  | . |
| .                  | .                  | .                  | .                  | .                  | .                  | . |
| .                  | .                  | .                  | .                  | .                  | .                  | . |
| Vv14g1344          | Tc04_g001570       | .                  | Gorai.007G075700.1 | .                  | .                  | . |
| Gorai.006G033100.1 | .                  | Gorai.012G063800.1 | .                  | Vv17g1007          | .                  | . |
| Tc03_g001980       | .                  | .                  | .                  | .                  | .                  | . |
| .                  | .                  | .                  | .                  | .                  | .                  | . |
| Vv14g1345          | Tc04_g001560       | Gorai.011G094900.1 | Gorai.             | .                  | .                  | . |
| 001G264500.1       | Gorai.006G033000.1 | .                  | .                  | .                  | .                  | . |
| .                  | .                  | .                  | .                  | .                  | .                  | . |
| .                  | .                  | .                  | .                  | .                  | .                  | . |
| Vv14g1346          | Tc04_g001550       | Gorai.011G095000.1 | .                  | .                  | .                  | . |
| .                  | .                  | .                  | .                  | .                  | .                  | . |



|                    |                    |                    |                    |                    |   |   |
|--------------------|--------------------|--------------------|--------------------|--------------------|---|---|
| Vv14g1347          | Tc04_g001540       | .                  | .                  | .                  | . | . |
| .                  | .                  | .                  | .                  | .                  | . | . |
| Vv14g1348          | .                  | .                  | .                  | .                  | . | . |
| .                  | .                  | .                  | .                  | .                  | . | . |
| Vv14g1349          | .                  | .                  | .                  | .                  | . | . |
| .                  | .                  | .                  | .                  | .                  | . | . |
| Vv14g1350          | Tc04_g001520       | .                  | .                  | .                  | . | . |
| .                  | .                  | .                  | .                  | .                  | . | . |
| Vv14g1351          | .                  | Gorai.001G264400.1 | .                  | Gorai.             | . | . |
| 007G075900.1       | Gorai.006G032800.1 | .                  | Gorai.012G063700.1 | .                  | . | . |
| .                  | .                  | .                  | .                  | .                  | . | . |
| Vv14g1352          | .                  | .                  | .                  | .                  | . | . |
| .                  | .                  | .                  | .                  | .                  | . | . |
| Vv14g1353          | Tc04_g001510       | .                  | .                  | Gorai.007G076000.1 | . | . |
| .                  | Gorai.012G063600.1 | .                  | .                  | .                  | . | . |
| .                  | .                  | .                  | .                  | .                  | . | . |
| Vv14g1354          | Tc04_g001490       | .                  | .                  | .                  | . | . |
| Gorai.012G063500.1 | Vv17g1003          | .                  | .                  | .                  | . | . |
| .                  | .                  | .                  | .                  | .                  | . | . |
| Vv14g1355          | Tc04_g001480       | .                  | Gorai.001G264300.1 | .                  | . | . |
| .                  | .                  | .                  | .                  | .                  | . | . |
| Vv14g1356          | Tc04_g001470       | .                  | Gorai.001G264200.1 | .                  | . | . |
| .                  | .                  | .                  | .                  | .                  | . | . |
| Vv14g1357          | .                  | .                  | .                  | .                  | . | . |
| .                  | .                  | .                  | .                  | .                  | . | . |
| Vv14g1358          | Tc04_g001440       | .                  | Gorai.001G264100.1 | .                  | . | . |
| .                  | .                  | .                  | .                  | .                  | . | . |
| Vv14g1359          | Tc04_g001430       | .                  | Gorai.001G264000.1 | .                  | . | . |
| Gorai.006G032200.1 | .                  | .                  | .                  | .                  | . | . |
| .                  | .                  | .                  | .                  | .                  | . | . |
| Vv14g1360          | .                  | .                  | .                  | .                  | . | . |
| .                  | .                  | .                  | .                  | .                  | . | . |
| Vv14g1361          | Tc04_g001420       | .                  | .                  | .                  | . | . |
| Vv17g0978          | Tc03_g001550       | .                  | .                  | .                  | . | . |
| .                  | .                  | .                  | .                  | .                  | . | . |

|                    |                    |                    |                    |        |   |
|--------------------|--------------------|--------------------|--------------------|--------|---|
| Vv14g1362          | Tc04_g001390       | .                  | .                  | .      | . |
| Gorai.012G063400.1 | .                  | .                  | .                  | .      | . |
| .                  | .                  | .                  | .                  | .      | . |
| Vv14g1363          | Tc04_g001380       | Gorai.011G095200.1 | .                  | .      | . |
| .                  | .                  | .                  | .                  | .      | . |
| .                  | .                  | .                  | .                  | .      | . |
| Vv14g1364          | Tc04_g001370       | Gorai.011G095300.1 | Gorai.             | .      | . |
| 001G263700.1       | .                  | .                  | .                  | .      | . |
| .                  | .                  | .                  | .                  | .      | . |
| .                  | .                  | .                  | .                  | .      | . |
| Vv14g1365          | .                  | .                  | Gorai.006G032100.1 | .      | . |
| .                  | .                  | .                  | .                  | .      | . |
| .                  | .                  | .                  | .                  | .      | . |
| Vv14g1366          | .                  | .                  | .                  | .      | . |
| .                  | .                  | .                  | .                  | .      | . |
| .                  | .                  | .                  | .                  | .      | . |
| Vv14g1367          | Tc04_g001360       | Gorai.011G095400.1 | .                  | .      | . |
| .                  | .                  | .                  | .                  | .      | . |
| .                  | .                  | .                  | .                  | .      | . |
| Vv14g1368          | .                  | .                  | .                  | .      | . |
| .                  | .                  | .                  | .                  | .      | . |
| .                  | .                  | .                  | .                  | .      | . |
| Vv14g1369          | .                  | .                  | Gorai.006G032000.1 | .      | . |
| .                  | .                  | .                  | .                  | .      | . |
| .                  | .                  | .                  | .                  | .      | . |
| Vv14g1370          | Tc04_g001350       | .                  | .                  | Gorai. | . |
| 006G031800.1       | Vv17g0967          | Tc03_g001450       | .                  | .      | . |
| .                  | .                  | .                  | .                  | .      | . |
| .                  | .                  | .                  | .                  | .      | . |
| Vv14g1371          | .                  | .                  | .                  | .      | . |
| Vv17g0966          | Tc03_g001440       | .                  | .                  | .      | . |
| .                  | .                  | .                  | .                  | .      | . |
| .                  | .                  | .                  | .                  | .      | . |
| Vv14g1372          | Tc04_g001340       | .                  | .                  | .      | . |
| Vv17g0960          | Tc03_g001390       | .                  | .                  | .      | . |
| .                  | .                  | .                  | .                  | .      | . |
| .                  | .                  | .                  | .                  | .      | . |
| Vv14g1373          | Tc04_g001320       | .                  | .                  | Gorai. | . |
| 006G031600.1       | .                  | .                  | .                  | .      | . |
| .                  | .                  | .                  | .                  | .      | . |
| .                  | .                  | .                  | .                  | .      | . |
| Vv14g1374          | Tc04_g001310       | .                  | .                  | .      | . |
| Gorai.012G063100.1 | Vv17g0955          | Tc03_g001360       | .                  | .      | . |
| .                  | .                  | .                  | .                  | .      | . |
| .                  | .                  | .                  | .                  | .      | . |
| Vv14g1375          | .                  | .                  | .                  | .      | . |
| Vv17g0953          | Gorai.001G071400.1 | .                  | .                  | .      | . |
| .                  | .                  | .                  | .                  | .      | . |
| .                  | .                  | .                  | .                  | .      | . |
| Vv14g1376          | Tc04_g001170       | Gorai.001G263600.1 | .                  | .      | . |
| .                  | .                  | .                  | .                  | .      | . |
| .                  | .                  | .                  | .                  | .      | . |
| Vv14g1377          | Tc04_g001160       | Gorai.001G263500.1 | .                  | .      | . |
| Gorai.006G031200.1 | Gorai.012G063000.1 | .                  | .                  | .      | . |

|                    |                    |                    |   |                    |   |        |   |
|--------------------|--------------------|--------------------|---|--------------------|---|--------|---|
| .                  | .                  | .                  | . | .                  | . | .      | . |
| .                  | .                  | .                  | . | .                  | . | .      | . |
| Vv14g1378          | .                  | .                  | . | .                  | . | .      | . |
| .                  | .                  | .                  | . | .                  | . | .      | . |
| .                  | .                  | .                  | . | .                  | . | .      | . |
| Vv14g1379          | Tc04_g001150       | .                  | . | .                  | . | Gorai. | . |
| 006G031000.1       | Gorai.012G062900.1 | .                  | . | .                  | . | .      | . |
| .                  | .                  | .                  | . | .                  | . | .      | . |
| .                  | .                  | .                  | . | .                  | . | .      | . |
| Vv14g1380          | Tc04_g001140       | .                  | . | .                  | . | .      | . |
| .                  | .                  | .                  | . | .                  | . | .      | . |
| .                  | .                  | .                  | . | .                  | . | .      | . |
| Vv14g1381          | Tc04_g001130       | .                  | . | Gorai.001G263400.1 | . | .      | . |
| .                  | .                  | .                  | . | .                  | . | .      | . |
| .                  | .                  | .                  | . | .                  | . | .      | . |
| Vv14g1382          | Tc04_g001120       | Gorai.011G095500.1 | . | .                  | . | .      | . |
| .                  | .                  | .                  | . | .                  | . | .      | . |
| .                  | .                  | .                  | . | .                  | . | .      | . |
| Vv14g1383          | .                  | .                  | . | .                  | . | .      | . |
| .                  | .                  | .                  | . | .                  | . | .      | . |
| .                  | .                  | .                  | . | .                  | . | .      | . |
| Vv14g1384          | Tc04_g001110       | .                  | . | Gorai.001G263300.1 | . | .      | . |
| .                  | Gorai.012G062700.1 | .                  | . | .                  | . | .      | . |
| .                  | .                  | .                  | . | .                  | . | .      | . |
| .                  | .                  | .                  | . | .                  | . | .      | . |
| Vv14g1385          | .                  | .                  | . | .                  | . | .      | . |
| .                  | .                  | .                  | . | .                  | . | .      | . |
| .                  | .                  | .                  | . | .                  | . | .      | . |
| Vv14g1386          | Tc04_g001100       | .                  | . | Gorai.001G263200.1 | . | .      | . |
| Gorai.006G030800.1 | .                  | .                  | . | .                  | . | .      | . |
| .                  | .                  | .                  | . | .                  | . | .      | . |
| .                  | .                  | .                  | . | .                  | . | .      | . |
| Vv14g1387          | Tc04_g001090       | Gorai.011G095600.1 | . | .                  | . | .      | . |
| Gorai.006G030700.1 | .                  | .                  | . | .                  | . | .      | . |
| .                  | .                  | .                  | . | .                  | . | .      | . |
| .                  | .                  | .                  | . | .                  | . | .      | . |
| Vv14g1388          | Tc04_g001080       | .                  | . | Gorai.001G263100.1 | . | .      | . |
| .                  | Gorai.012G062600.1 | .                  | . | Vv17g0943          | . | .      | . |
| Tc03_g001290       | .                  | .                  | . | .                  | . | .      | . |
| .                  | .                  | .                  | . | .                  | . | .      | . |
| Vv14g1389          | .                  | .                  | . | .                  | . | .      | . |
| .                  | .                  | .                  | . | .                  | . | .      | . |
| .                  | .                  | .                  | . | .                  | . | .      | . |
| Vv14g1390          | Tc04_g001070       | .                  | . | .                  | . | .      | . |
| Gorai.012G062400.1 | .                  | .                  | . | .                  | . | .      | . |
| .                  | .                  | .                  | . | .                  | . | .      | . |
| Vv14g1391          | Tc04_g001060       | .                  | . | Gorai.001G263000.1 | . | .      | . |
| .                  | Gorai.012G062300.1 | .                  | . | .                  | . | .      | . |
| .                  | .                  | .                  | . | .                  | . | .      | . |
| .                  | .                  | .                  | . | .                  | . | .      | . |
| .                  | .                  | .                  | . | .                  | . | .      | . |

|                    |                    |                    |                    |                    |   |
|--------------------|--------------------|--------------------|--------------------|--------------------|---|
| Vv14g1392          | Tc04_g001050       | .                  | .                  | Gorai.007G076200.1 | . |
|                    | Gorai.006G030600.1 | .                  | .                  | .                  | . |
| .                  | .                  | .                  | .                  | .                  | . |
| Vv14g1393          | Tc04_g001040       | .                  | .                  | Gorai.             | . |
| 006G030500.1       | Gorai.012G062200.1 | .                  | .                  | .                  | . |
| .                  | .                  | .                  | .                  | .                  | . |
| Vv14g1394          | Tc04_g001030       | .                  | Gorai.001G262800.1 | .                  | . |
| .                  | .                  | .                  | .                  | .                  | . |
| Vv14g1395          | Tc04_g001020       | Gorai.011G095700.1 | .                  | .                  | . |
| Gorai.007G076300.1 | Gorai.006G030400.1 | .                  | .                  | .                  | . |
| .                  | .                  | .                  | .                  | .                  | . |
| Vv14g1396          | Tc04_g001010       | .                  | Gorai.001G262700.1 | .                  | . |
| .                  | Gorai.012G062000.1 | .                  | .                  | .                  | . |
| .                  | .                  | .                  | .                  | .                  | . |
| Vv14g1397          | Tc04_g001000       | Gorai.011G095800.1 | Gorai.             | .                  | . |
| 001G262600.1       | .                  | Vv17g0931          | .                  | .                  | . |
| .                  | .                  | .                  | .                  | .                  | . |
| Vv14g1398          | Tc04_g000990       | .                  | Gorai.001G262500.1 | .                  | . |
| .                  | Vv01g0753          | Tc02_g025190       | Gorai.002G188400.1 | .                  | . |
|                    | Gorai.005G176500.1 | .                  | .                  | .                  | . |
| Vv14g1399          | Tc04_g000980       | .                  | Gorai.001G262400.1 | .                  | . |
|                    | Gorai.006G030300.1 | Gorai.012G061900.1 | .                  | .                  | . |
| .                  | .                  | .                  | .                  | .                  | . |
| Vv14g1400          | Tc04_g000970       | .                  | .                  | .                  | . |
| Gorai.012G061800.1 | .                  | .                  | .                  | .                  | . |
| .                  | .                  | .                  | .                  | .                  | . |
| Vv14g1401          | Tc04_g000950       | .                  | Gorai.001G262300.1 | .                  | . |
| .                  | .                  | .                  | .                  | .                  | . |
| .                  | .                  | .                  | .                  | .                  | . |
| Vv14g1402          | .                  | .                  | .                  | .                  | . |
| .                  | .                  | .                  | .                  | .                  | . |
| Vv14g1403          | Tc04_g000940       | .                  | .                  | .                  | . |
| .                  | .                  | .                  | .                  | .                  | . |
| Vv14g1404          | .                  | Gorai.001G262200.1 | .                  | .                  | . |
| .                  | .                  | .                  | .                  | .                  | . |
| Vv14g1405          | Tc04_g000930       | .                  | Gorai.001G262100.1 | .                  | . |
| .                  | Gorai.012G061700.1 | .                  | .                  | .                  | . |
| .                  | .                  | .                  | .                  | .                  | . |
| .                  | .                  | .                  | .                  | .                  | . |

|                    |                    |   |                    |                    |   |        |   |
|--------------------|--------------------|---|--------------------|--------------------|---|--------|---|
| Vv14g1406          | .                  | . | .                  | .                  | . | .      | . |
| .                  | .                  | . | .                  | .                  | . | .      | . |
| Vv14g1407          | Tc04_g000920       | . | .                  | .                  | . | Gorai. | . |
| 006G030200.1       | Gorai.012G061500.1 | . | .                  | Vv17g0922          | . | .      | . |
| Tc03_g001070       | .                  | . | .                  | .                  | . | .      | . |
| .                  | .                  | . | .                  | .                  | . | .      | . |
| Vv14g1408          | .                  | . | .                  | .                  | . | .      | . |
| .                  | .                  | . | .                  | .                  | . | .      | . |
| Vv14g1409          | Tc04_g000910       | . | .                  | Gorai.001G262000.1 | . | .      | . |
| Gorai.006G030100.1 | .                  | . | .                  | .                  | . | .      | . |
| .                  | .                  | . | .                  | .                  | . | .      | . |
| Vv14g1410          | Tc04_g000880       | . | .                  | Gorai.001G261500.1 | . | .      | . |
| .                  | Vv17g0916          | . | .                  | Tc03_g001050       | . | .      | . |
| .                  | .                  | . | .                  | .                  | . | .      | . |
| Vv14g1411          | Tc04_g000870       | . | .                  | .                  | . | Gorai. | . |
| 006G029800.1       | .                  | . | .                  | .                  | . | .      | . |
| .                  | .                  | . | .                  | .                  | . | .      | . |
| Vv14g1412          | Tc04_g000850       | . | .                  | Gorai.001G261400.1 | . | .      | . |
| .                  | .                  | . | .                  | .                  | . | .      | . |
| Vv14g1413          | .                  | . | .                  | .                  | . | .      | . |
| .                  | .                  | . | .                  | .                  | . | .      | . |
| Vv14g1414          | .                  | . | .                  | .                  | . | .      | . |
| .                  | .                  | . | .                  | .                  | . | .      | . |
| Vv14g1415          | .                  | . | .                  | .                  | . | .      | . |
| .                  | .                  | . | .                  | .                  | . | .      | . |
| Vv14g1416          | Tc04_g000840       | . | .                  | Gorai.007G076500.1 | . | .      | . |
| .                  | .                  | . | .                  | .                  | . | .      | . |
| Vv14g1417          | .                  | . | .                  | .                  | . | .      | . |
| .                  | .                  | . | .                  | .                  | . | .      | . |
| Vv14g1418          | Tc04_g000830       | . | .                  | .                  | . | .      | . |
| .                  | .                  | . | .                  | .                  | . | .      | . |
| Vv01g0785          | Tc02_g023410       | . | .                  | Gorai.005G182900.1 | . | .      | . |
| .                  | .                  | . | .                  | .                  | . | .      | . |
| Vv14g1419          | Tc04_g000810       | . | .                  | Gorai.001G261300.1 | . | .      | . |
| Gorai.007G076700.1 | .                  | . | Gorai.012G061300.1 | .                  | . | .      | . |
| .                  | .                  | . | .                  | .                  | . | .      | . |
| Vv14g1420          | Tc04_g000800       | . | .                  | Gorai.001G261200.1 | . | .      | . |
| Gorai.006G029700.1 | .                  | . | .                  | .                  | . | .      | . |
| .                  | .                  | . | .                  | .                  | . | .      | . |

|                    |                    |                    |        |   |
|--------------------|--------------------|--------------------|--------|---|
| Vv14g1421          | Tc04_g000790       | .                  | .      | . |
| Gorai.012G061200.1 | Vv17g0904          | Tc03_g000950       | Gorai. | . |
| 001G068400.1       | .                  | .                  | .      | . |
| Vv14g1422          | .                  | .                  | .      | . |
| .                  | .                  | .                  | .      | . |
| Vv14g1423          | .                  | .                  | .      | . |
| .                  | .                  | .                  | .      | . |
| Vv14g1424          | Tc04_g000770       | Gorai.011G095900.1 | .      | . |
| .                  | .                  | .                  | .      | . |
| Vv14g1425          | Tc04_g000760       | .                  | Gorai. | . |
| 006G029600.1       | .                  | .                  | .      | . |
| .                  | Vv01g0791          | Tc02_g000580       | .      | . |
| .                  | .                  | .                  | .      | . |
| Vv14g1426          | .                  | .                  | .      | . |
| .                  | .                  | .                  | .      | . |
| Vv14g1427          | Tc04_g000750       | .                  | Gorai. | . |
| 006G029400.1       | Gorai.012G061000.1 | .                  | .      | . |
| .                  | .                  | .                  | .      | . |
| Vv14g1428          | .                  | .                  | .      | . |
| .                  | .                  | .                  | .      | . |
| Vv14g1429          | .                  | .                  | .      | . |
| .                  | .                  | .                  | .      | . |
| Vv14g1430          | .                  | .                  | .      | . |
| .                  | .                  | .                  | .      | . |
| Vv14g1431          | Tc04_g000730       | .                  | .      | . |
| .                  | .                  | .                  | .      | . |
| Vv14g1432          | .                  | .                  | .      | . |
| .                  | .                  | .                  | .      | . |
| Vv14g1433          | .                  | .                  | .      | . |
| Vv17g0898          | .                  | .                  | .      | . |
| .                  | .                  | .                  | .      | . |
| Vv14g1434          | Tc04_g000720       | .                  | Gorai. | . |
| 006G029200.1       | .                  | .                  | .      | . |
| .                  | .                  | .                  | .      | . |
| Vv14g1435          | Tc04_g000710       | Gorai.001G261100.1 | .      | . |
| .                  | Vv17g0896          | Tc03_g000920       | .      | . |
| .                  | Gorai.008G158500.1 | Vv01g0800          | .      | . |
| .                  | .                  | Gorai.008G155700.1 | .      | . |

|                    |                    |                    |                    |        |   |
|--------------------|--------------------|--------------------|--------------------|--------|---|
| Vv14g1436          | Tc04_g000700       | .                  | .                  | .      | . |
| Gorai.012G060800.1 | Vv17g0895          | .                  | .                  | .      | . |
| .                  | Gorai.006G187100.1 | .                  | .                  | .      | . |
| .                  | .                  | .                  | .                  | .      | . |
| Vv14g1437          | .                  | .                  | .                  | .      | . |
| .                  | .                  | .                  | .                  | .      | . |
| .                  | .                  | .                  | .                  | .      | . |
| Vv14g1438          | Tc04_g000680       | .                  | .                  | .      | . |
| Gorai.012G060600.1 | .                  | .                  | .                  | .      | . |
| .                  | .                  | .                  | .                  | .      | . |
| Vv14g1439          | Tc04_g000670       | .                  | .                  | Gorai. | . |
| 006G029100.1       | Gorai.012G060500.1 | .                  | .                  | .      | . |
| .                  | .                  | Vv01g0805          | Tc02_g000600       | .      | . |
| Gorai.002G213100.1 | .                  | .                  | Gorai.012G171200.1 | .      | . |
| Vv14g1440          | Tc04_g000660       | .                  | Gorai.001G260900.1 | .      | . |
| .                  | .                  | .                  | .                  | .      | . |
| .                  | Vv01g0814          | .                  | Gorai.             | .      | . |
| 009G343600.1       | Gorai.012G171100.1 | .                  | .                  | .      | . |
| Vv14g1441          | Tc04_g000630       | .                  | Gorai.007G076900.1 | .      | . |
| .                  | Vv17g0889          | Tc03_g000800       | .                  | .      | . |
| .                  | .                  | .                  | .                  | .      | . |
| Vv14g1442          | .                  | .                  | .                  | .      | . |
| .                  | .                  | .                  | .                  | .      | . |
| .                  | .                  | .                  | .                  | .      | . |
| Vv14g1443          | Tc04_g000610       | .                  | Gorai.001G260600.1 | .      | . |
| .                  | .                  | .                  | .                  | .      | . |
| .                  | .                  | .                  | .                  | .      | . |
| Vv14g1444          | .                  | .                  | .                  | .      | . |
| .                  | .                  | .                  | .                  | .      | . |
| .                  | .                  | .                  | .                  | .      | . |
| Vv14g1445          | Tc04_g000590       | .                  | Gorai.001G260400.1 | .      | . |
| Gorai.007G077000.1 | .                  | Gorai.012G060200.1 | .                  | .      | . |
| .                  | .                  | .                  | .                  | .      | . |
| .                  | .                  | .                  | .                  | .      | . |
| Vv14g1446          | Tc04_g000550       | .                  | .                  | .      | . |
| Gorai.012G060000.1 | Vv17g0879          | Tc03_g000710       | .                  | .      | . |
| .                  | Gorai.006G188000.1 | Vv01g0821          | .                  | .      | . |
| Tc02_g023300       | Gorai.005G184300.1 | .                  | .                  | .      | . |
| Vv14g1447          | Tc04_g000520       | .                  | .                  | .      | . |
| Gorai.012G059900.1 | Vv17g0877          | Tc03_g000690       | .                  | .      | . |
| .                  | Vv01g0832          | Tc02_g023290       | .                  | .      | . |
| Gorai.005G184400.1 | .                  | .                  | .                  | .      | . |
| Vv14g1448          | Tc04_g000500       | .                  | Gorai.007G077100.1 | .      | . |
| .                  | Vv17g0876          | Tc03_g000680       | Gorai.             | .      | . |
| 001G070400.1       | .                  | .                  | .                  | .      | . |
| .                  | .                  | .                  | .                  | .      | . |
| Vv14g1449          | Tc04_g000490       | .                  | .                  | .      | . |
| Gorai.012G059800.1 | .                  | .                  | .                  | .      | . |
| .                  | .                  | .                  | .                  | .      | . |

|                    |                    |                    |                    |                    |        |   |   |
|--------------------|--------------------|--------------------|--------------------|--------------------|--------|---|---|
| Vv14g1450          | .                  | .                  | .                  | .                  | .      | . | . |
| .                  | .                  | .                  | .                  | .                  | .      | . | . |
| Vv14g1451          | .                  | .                  | .                  | .                  | .      | . | . |
| .                  | .                  | .                  | .                  | .                  | .      | . | . |
| Vv14g1452          | Tc04_g000480       | .                  | .                  | .                  | .      | . | . |
| Gorai.012G059700.1 | .                  | .                  | .                  | .                  | .      | . | . |
| .                  | .                  | .                  | .                  | .                  | .      | . | . |
| Vv14g1453          | Tc04_g000460       | Gorai.011G096000.1 | .                  | .                  | .      | . | . |
| Gorai.006G028500.1 | .                  | Gorai.012G059600.1 | .                  | .                  | .      | . | . |
| .                  | .                  | .                  | .                  | .                  | .      | . | . |
| .                  | .                  | .                  | .                  | .                  | .      | . | . |
| Vv14g1454          | Tc04_g000450       | .                  | .                  | Gorai.007G077200.1 | .      | . | . |
| .                  | Gorai.012G059500.1 | .                  | .                  | .                  | .      | . | . |
| .                  | .                  | .                  | .                  | .                  | .      | . | . |
| .                  | .                  | .                  | .                  | .                  | .      | . | . |
| Vv14g1455          | .                  | .                  | .                  | .                  | .      | . | . |
| Vv17g0873          | Tc03_g000650       | .                  | .                  | .                  | .      | . | . |
| Gorai.006G187700.1 | .                  | .                  | .                  | .                  | .      | . | . |
| .                  | .                  | .                  | .                  | .                  | .      | . | . |
| Vv14g1456          | .                  | .                  | .                  | .                  | .      | . | . |
| .                  | .                  | .                  | .                  | .                  | .      | . | . |
| .                  | .                  | .                  | .                  | .                  | .      | . | . |
| Vv14g1457          | Tc04_g000420       | .                  | .                  | .                  | Gorai. | . | . |
| 006G028400.1       | .                  | .                  | .                  | .                  | .      | . | . |
| .                  | .                  | .                  | .                  | .                  | .      | . | . |
| Vv14g1458          | .                  | .                  | .                  | .                  | .      | . | . |
| .                  | .                  | .                  | .                  | .                  | .      | . | . |
| .                  | .                  | .                  | .                  | .                  | .      | . | . |
| Vv14g1459          | .                  | .                  | .                  | .                  | .      | . | . |
| .                  | .                  | .                  | .                  | .                  | .      | . | . |
| .                  | .                  | .                  | .                  | .                  | .      | . | . |
| Vv14g1460          | .                  | .                  | .                  | .                  | .      | . | . |
| .                  | .                  | .                  | .                  | .                  | .      | . | . |
| .                  | .                  | .                  | .                  | .                  | .      | . | . |
| Vv14g1461          | Tc04_g000400       | .                  | Gorai.001G259900.1 | .                  | .      | . | . |
| .                  | .                  | .                  | .                  | .                  | .      | . | . |
| .                  | .                  | .                  | .                  | .                  | .      | . | . |
| Vv14g1462          | Tc04_g000390       | .                  | .                  | Gorai.007G077300.1 | .      | . | . |
| .                  | .                  | .                  | .                  | .                  | .      | . | . |
| .                  | Vv01g0850          | Tc02_g023050       | .                  | Gorai.             | .      | . | . |
| 005G185700.1       | .                  | .                  | .                  | .                  | .      | . | . |
| Vv14g1463          | Tc04_g000380       | .                  | Gorai.001G259800.1 | .                  | .      | . | . |
| .                  | .                  | .                  | .                  | .                  | .      | . | . |
| .                  | .                  | .                  | .                  | .                  | .      | . | . |
| Vv14g1464          | .                  | .                  | .                  | .                  | .      | . | . |
| .                  | .                  | .                  | .                  | .                  | .      | . | . |
| .                  | .                  | .                  | .                  | .                  | .      | . | . |
| Vv14g1465          | .                  | Gorai.001G259700.1 | .                  | .                  | .      | . | . |



|                    |                    |                    |                    |        |   |
|--------------------|--------------------|--------------------|--------------------|--------|---|
| .                  | Vv17g0862          | .                  | .                  | .      | . |
| Gorai.006G187800.1 | .                  | .                  | .                  | .      | . |
| Vv14g1466          | Tc04_g000360       | .                  | Gorai.001G259600.1 | .      | . |
| .                  | .                  | .                  | .                  | .      | . |
| Vv14g1467          | .                  | .                  | .                  | .      | . |
| Vv17g0841          | Tc03_g000280       | .                  | .                  | .      | . |
| .                  | .                  | .                  | .                  | .      | . |
| Vv14g1468          | .                  | .                  | .                  | .      | . |
| .                  | .                  | .                  | .                  | .      | . |
| Vv14g1469          | .                  | .                  | .                  | .      | . |
| .                  | .                  | .                  | .                  | .      | . |
| Vv14g1470          | .                  | Gorai.001G259500.1 | .                  | .      | . |
| .                  | Vv17g0828          | .                  | .                  | .      | . |
| .                  | .                  | .                  | .                  | .      | . |
| Vv14g1471          | Tc04_g000350       | .                  | .                  | .      | . |
| Vv17g0825          | .                  | .                  | .                  | .      | . |
| .                  | .                  | .                  | .                  | .      | . |
| Vv14g1472          | .                  | .                  | .                  | .      | . |
| Vv17g0823          | .                  | .                  | .                  | .      | . |
| .                  | .                  | .                  | .                  | .      | . |
| Vv14g1473          | Tc04_g000340       | .                  | Gorai.001G259400.1 | .      | . |
| .                  | Gorai.012G059300.1 | .                  | .                  | .      | . |
| .                  | .                  | .                  | .                  | .      | . |
| Vv14g1474          | .                  | .                  | .                  | .      | . |
| .                  | .                  | .                  | .                  | .      | . |
| Vv14g1475          | Tc04_g000330       | .                  | Gorai.001G259300.1 | .      | . |
| .                  | .                  | .                  | .                  | .      | . |
| Vv14g1476          | Tc04_g000320       | .                  | Gorai.001G259200.1 | .      | . |
| .                  | .                  | .                  | .                  | .      | . |
| Vv14g1477          | Tc04_g000310       | .                  | .                  | Gorai. | . |
| 006G028100.1       | .                  | .                  | .                  | .      | . |
| .                  | Vv01g0868          | .                  | .                  | .      | . |
| Gorai.012G123100.1 | .                  | .                  | .                  | .      | . |
| Vv14g1478          | Tc04_g000300       | .                  | Gorai.001G259100.1 | .      | . |
| Gorai.006G028000.1 | .                  | .                  | .                  | .      | . |
| .                  | .                  | .                  | .                  | .      | . |
| Vv14g1479          | Tc04_g000290       | .                  | .                  | Gorai. | . |
| 006G027700.1       | .                  | .                  | .                  | .      | . |
| .                  | .                  | .                  | .                  | .      | . |
| Vv14g1480          | Tc04_g000280       | .                  | Gorai.001G259000.1 | .      | . |
| .                  | Gorai.012G059200.1 | .                  | .                  | .      | . |

|                    |              |   |                    |                    |   |                    |   |
|--------------------|--------------|---|--------------------|--------------------|---|--------------------|---|
| .                  | .            | . | .                  | .                  | . | .                  | . |
| .                  | .            | . | .                  | .                  | . | .                  | . |
| Vv14g1481          | .            | . | .                  | .                  | . | Gorai.             | . |
| 012G058700.1       | .            | . | .                  | .                  | . | .                  | . |
| Vv01g0871          | .            | . | .                  | .                  | . | Gorai.009G345000.1 | . |
| .                  | .            | . | .                  | .                  | . | .                  | . |
| Vv14g1482          | .            | . | .                  | .                  | . | .                  | . |
| .                  | .            | . | .                  | .                  | . | .                  | . |
| .                  | .            | . | .                  | .                  | . | .                  | . |
| Vv14g1483          | Tc04_g015390 | . | .                  | Gorai.001G258900.1 | . | .                  | . |
| .                  | .            | . | .                  | .                  | . | .                  | . |
| Vv14g1484          | Tc04_g015410 | . | .                  | .                  | . | .                  | . |
| .                  | .            | . | .                  | .                  | . | .                  | . |
| Vv14g1485          | .            | . | .                  | .                  | . | .                  | . |
| .                  | .            | . | .                  | .                  | . | .                  | . |
| Vv14g1486          | .            | . | Gorai.001G258800.1 | .                  | . | .                  | . |
| .                  | .            | . | .                  | .                  | . | .                  | . |
| Vv14g1487          | Tc04_g007060 | . | .                  | .                  | . | .                  | . |
| .                  | .            | . | .                  | .                  | . | .                  | . |
| Vv14g1488          | .            | . | .                  | .                  | . | .                  | . |
| .                  | .            | . | .                  | .                  | . | .                  | . |
| Vv14g1489          | .            | . | .                  | .                  | . | .                  | . |
| .                  | .            | . | .                  | .                  | . | .                  | . |
| Vv14g1490          | Tc04_g007120 | . | .                  | .                  | . | .                  | . |
| .                  | .            | . | .                  | .                  | . | .                  | . |
| Vv14g1491          | .            | . | .                  | .                  | . | .                  | . |
| .                  | .            | . | .                  | .                  | . | .                  | . |
| Vv14g1492          | Tc04_g007210 | . | .                  | .                  | . | .                  | . |
| .                  | .            | . | .                  | .                  | . | .                  | . |
| Vv14g1493          | .            | . | .                  | .                  | . | .                  | . |
| .                  | .            | . | .                  | .                  | . | .                  | . |
| Vv14g1494          | .            | . | Gorai.001G258100.1 | .                  | . | .                  | . |
| .                  | .            | . | .                  | .                  | . | .                  | . |
| Vv14g1495          | Tc04_g015620 | . | Gorai.001G257600.1 | .                  | . | .                  | . |
| Gorai.007G201000.1 | .            | . | .                  | .                  | . | .                  | . |
| .                  | .            | . | .                  | .                  | . | .                  | . |
| Vv14g1496          | .            | . | .                  | .                  | . | .                  | . |

|              |                    |  |  |                    |                    |  |  |
|--------------|--------------------|--|--|--------------------|--------------------|--|--|
| Vv14g1497    |                    |  |  |                    |                    |  |  |
| Vv14g1498    |                    |  |  | Gorai.007G078200.1 |                    |  |  |
| Vv14g1499    |                    |  |  | Gorai.007G078100.1 |                    |  |  |
| Vv14g1500    | Tc04_g000970       |  |  |                    |                    |  |  |
| Vv14g1501    |                    |  |  | Gorai.007G078000.1 |                    |  |  |
| Vv14g1502    |                    |  |  |                    |                    |  |  |
| Vv14g1503    |                    |  |  |                    |                    |  |  |
| Vv14g1504    |                    |  |  |                    |                    |  |  |
| Vv17g0576    |                    |  |  |                    | Gorai.008G189700.1 |  |  |
| 009G346100.1 | Vv01g0892          |  |  |                    | Gorai.             |  |  |
| Vv14g1505    | Gorai.008G189700.1 |  |  |                    |                    |  |  |
| Vv14g1506    | Tc04_g015680       |  |  |                    |                    |  |  |
| Vv14g1507    |                    |  |  | Gorai.007G033900.1 |                    |  |  |
| Vv14g1508    |                    |  |  |                    |                    |  |  |
| Vv14g1509    |                    |  |  |                    |                    |  |  |
| Vv14g1510    |                    |  |  |                    |                    |  |  |
| Vv14g1511    |                    |  |  |                    |                    |  |  |
| Vv14g1512    |                    |  |  |                    |                    |  |  |

|                    |                    |                    |                    |        |   |
|--------------------|--------------------|--------------------|--------------------|--------|---|
| Vv14g1513          | Tc04_g012930       | .                  | .                  | .      | . |
| .                  | .                  | .                  | .                  | .      | . |
| Vv14g1514          | .                  | .                  | .                  | .      | . |
| .                  | .                  | .                  | .                  | .      | . |
| Vv14g1515          | .                  | .                  | .                  | .      | . |
| .                  | .                  | .                  | .                  | .      | . |
| Vv14g1516          | Tc04_g012950       | .                  | .                  | .      | . |
| .                  | .                  | .                  | .                  | .      | . |
| Vv14g1517          | .                  | .                  | .                  | .      | . |
| .                  | .                  | .                  | .                  | .      | . |
| Vv14g1518          | .                  | .                  | Gorai.007G077800.1 | .      | . |
| Gorai.006G026900.1 | .                  | .                  | .                  | .      | . |
| .                  | .                  | .                  | .                  | .      | . |
| Vv14g1519          | .                  | .                  | .                  | .      | . |
| .                  | .                  | .                  | .                  | .      | . |
| Vv14g1520          | .                  | .                  | .                  | .      | . |
| .                  | .                  | .                  | .                  | .      | . |
| Vv14g1521          | .                  | .                  | .                  | Gorai. | . |
| 012G058500.1       | .                  | .                  | .                  | .      | . |
| .                  | .                  | .                  | .                  | .      | . |
| Vv14g1522          | .                  | .                  | .                  | .      | . |
| .                  | .                  | .                  | .                  | .      | . |
| Vv14g1523          | .                  | .                  | Gorai.007G077700.1 | .      | . |
| .                  | .                  | .                  | .                  | .      | . |
| Vv14g1524          | .                  | .                  | .                  | .      | . |
| .                  | .                  | .                  | .                  | .      | . |
| Vv14g1525          | .                  | .                  | .                  | .      | . |
| .                  | .                  | .                  | .                  | .      | . |
| Vv14g1526          | Tc04_g000710       | .                  | Gorai.007G074700.1 | .      | . |
| .                  | .                  | .                  | .                  | .      | . |
| Vv14g1527          | .                  | Gorai.001G257500.1 | Gorai.             | .      | . |
| 007G200200.1       | Gorai.006G026100.1 | .                  | .                  | .      | . |
| .                  | .                  | .                  | .                  | .      | . |
| Vv14g1528          | .                  | Gorai.001G257400.1 | Gorai.             | .      | . |
| 007G200000.1       | Gorai.006G026000.1 | .                  | .                  | .      | . |

|                    |                    |              |   |   |   |                    |   |
|--------------------|--------------------|--------------|---|---|---|--------------------|---|
| .                  | .                  | .            | . | . | . | .                  | . |
| Vv14g1529          | Tc04_g007270       | .            | . | . | . | Gorai.             | . |
| 006G025900.1       | .                  | .            | . | . | . | .                  | . |
| .                  | Vv01g0911          | .            | . | . | . | .                  | . |
| .                  | .                  | .            | . | . | . | .                  | . |
| Vv14g1530          | Tc04_g007280       | .            | . | . | . | .                  | . |
| .                  | .                  | .            | . | . | . | .                  | . |
| .                  | .                  | .            | . | . | . | .                  | . |
| Vv14g1531          | Tc04_g007300       | .            | . | . | . | .                  | . |
| .                  | .                  | .            | . | . | . | .                  | . |
| Vv01g0921          | Tc02_g022210       | .            | . | . | . | .                  | . |
| Vv14g1532          | .                  | .            | . | . | . | .                  | . |
| .                  | .                  | .            | . | . | . | Vv01g0922          | . |
| Tc02_g022200       | Gorai.002G164600.1 | .            | . | . | . | Gorai.005G189500.1 | . |
| .                  | .                  | .            | . | . | . | .                  | . |
| Vv14g1533          | .                  | .            | . | . | . | .                  | . |
| Vv17g0596          | .                  | .            | . | . | . | .                  | . |
| .                  | .                  | .            | . | . | . | .                  | . |
| Vv14g1534          | Tc04_g007880       | .            | . | . | . | Gorai.             | . |
| 006G025600.1       | .                  | .            | . | . | . | .                  | . |
| .                  | .                  | .            | . | . | . | .                  | . |
| Vv14g1535          | .                  | .            | . | . | . | Gorai.007G034900.1 | . |
| .                  | .                  | .            | . | . | . | .                  | . |
| .                  | .                  | .            | . | . | . | .                  | . |
| Vv14g1536          | .                  | .            | . | . | . | .                  | . |
| .                  | .                  | .            | . | . | . | .                  | . |
| .                  | .                  | .            | . | . | . | .                  | . |
| Vv14g1537          | .                  | .            | . | . | . | .                  | . |
| .                  | .                  | .            | . | . | . | .                  | . |
| .                  | .                  | .            | . | . | . | .                  | . |
| Vv14g1538          | Tc04_g025710       | .            | . | . | . | .                  | . |
| .                  | .                  | .            | . | . | . | .                  | . |
| .                  | .                  | .            | . | . | . | .                  | . |
| Vv14g1539          | .                  | .            | . | . | . | .                  | . |
| Vv17g0600          | .                  | .            | . | . | . | .                  | . |
| .                  | .                  | .            | . | . | . | .                  | . |
| Vv14g1540          | Tc04_g016040       | .            | . | . | . | Gorai.007G198800.1 | . |
| .                  | .                  | .            | . | . | . | .                  | . |
| .                  | Vv01g0926          | Tc02_g022140 | . | . | . | .                  | . |
| Gorai.009G346700.1 | .                  | .            | . | . | . | .                  | . |
| Vv14g1541          | Tc04_g013320       | .            | . | . | . | Gorai.007G196200.1 | . |
| .                  | .                  | .            | . | . | . | .                  | . |
| .                  | .                  | .            | . | . | . | .                  | . |
| Vv14g1542          | Tc04_g017620       | .            | . | . | . | .                  | . |
| .                  | .                  | .            | . | . | . | .                  | . |
| .                  | .                  | .            | . | . | . | .                  | . |
| Vv14g1543          | Tc04_g025970       | .            | . | . | . | .                  | . |
| .                  | .                  | .            | . | . | . | .                  | . |
| Vv17g0616          | Tc03_g009550       | .            | . | . | . | .                  | . |
| .                  | Vv01g0940          | Tc02_g034120 | . | . | . | .                  | . |

|              |                    |              |   |   |   |        |   |
|--------------|--------------------|--------------|---|---|---|--------|---|
| Vv14g1544    | .                  | .            | . | . | . | .      | . |
| .            | .                  | .            | . | . | . | .      | . |
| Vv14g1545    | .                  | .            | . | . | . | .      | . |
| .            | .                  | .            | . | . | . | .      | . |
| Vv14g1546    | .                  | .            | . | . | . | .      | . |
| .            | .                  | .            | . | . | . | .      | . |
| Vv14g1547    | .                  | .            | . | . | . | .      | . |
| .            | .                  | .            | . | . | . | .      | . |
| Vv14g1548    | .                  | .            | . | . | . | .      | . |
| .            | .                  | .            | . | . | . | .      | . |
| Vv14g1549    | .                  | .            | . | . | . | .      | . |
| .            | .                  | .            | . | . | . | .      | . |
| Vv14g1550    | Tc04_g016210       | .            | . | . | . | .      | . |
| .            | .                  | .            | . | . | . | .      | . |
| Vv14g1551    | .                  | .            | . | . | . | .      | . |
| Vv17g0621    | Tc03_g009580       | .            | . | . | . | Gorai. | . |
| 008G182700.1 | Vv01g0951          | Tc02_g034040 | . | . | . | .      | . |
| .            | Gorai.008G190600.1 | .            | . | . | . | .      | . |
| Vv14g1552    | .                  | .            | . | . | . | .      | . |
| .            | .                  | .            | . | . | . | .      | . |
| Vv14g1553    | .                  | .            | . | . | . | .      | . |
| .            | .                  | .            | . | . | . | .      | . |
| Vv14g1554    | .                  | .            | . | . | . | .      | . |
| Vv17g0625    | Tc03_g009670       | .            | . | . | . | .      | . |
| Vv01g0953    | Tc02_g034020       | .            | . | . | . | .      | . |
| .            | .                  | .            | . | . | . | .      | . |
| Vv14g1555    | .                  | .            | . | . | . | .      | . |
| .            | .                  | .            | . | . | . | .      | . |
| Vv14g1556    | .                  | .            | . | . | . | .      | . |
| .            | .                  | .            | . | . | . | .      | . |
| Vv14g1557    | Tc04_g007900       | .            | . | . | . | Gorai. | . |
| 006G025400.1 | .                  | .            | . | . | . | .      | . |
| .            | .                  | .            | . | . | . | .      | . |
| Vv14g1558    | Tc04_g007930       | .            | . | . | . | Gorai. | . |
| 006G025300.1 | .                  | .            | . | . | . | .      | . |
| .            | .                  | .            | . | . | . | .      | . |
| Vv14g1559    | Tc05_g023660       | .            | . | . | . | .      | . |
| Vv17g0630    | .                  | .            | . | . | . | .      | . |

|                    |                    |              |                    |                    |   |           |   |
|--------------------|--------------------|--------------|--------------------|--------------------|---|-----------|---|
| Vv14g1560          | .                  | .            | .                  | .                  | . | .         | . |
| .                  | .                  | .            | .                  | .                  | . | .         | . |
| Vv14g1561          | .                  | .            | .                  | .                  | . | .         | . |
| .                  | .                  | .            | .                  | .                  | . | .         | . |
| Vv14g1562          | .                  | .            | .                  | .                  | . | .         | . |
| Vv17g0634          | Tc03_g009820       | .            | .                  | .                  | . | Gorai.    | . |
| 008G191200.1       | .                  | Vv01g0961    | .                  | Tc02_g033950       | . | Gorai.    | . |
| 013G074800.1       | .                  | .            | Gorai.008G191200.1 | .                  | . | Gorai.    | . |
| 012G117800.1       | .                  | .            | .                  | .                  | . | .         | . |
| Vv14g1563          | .                  | .            | .                  | .                  | . | .         | . |
| .                  | .                  | .            | .                  | .                  | . | .         | . |
| Vv14g1564          | Tc05_g023640       | .            | .                  | .                  | . | .         | . |
| Vv17g0636          | .                  | .            | .                  | .                  | . | Gorai.    | . |
| 008G182300.1       | .                  | Vv01g0964    | .                  | Tc02_g033920       | . | .         | . |
| .                  | Gorai.008G191300.1 | .            | .                  | .                  | . | .         | . |
| Vv14g1565          | Tc04_g017560       | .            | .                  | .                  | . | .         | . |
| Vv17g0638          | Tc03_g009840       | .            | .                  | .                  | . | .         | . |
| .                  | Vv01g0966          | Tc02_g033900 | .                  | Gorai.013G082700.1 | . | .         | . |
| .                  | Gorai.009G323400.1 | .            | .                  | .                  | . | .         | . |
| Vv14g1566          | .                  | .            | .                  | Gorai.007G035800.1 | . | .         | . |
| .                  | Vv17g0639          | .            | .                  | Gorai.001G072400.1 | . | .         | . |
| .                  | .                  | .            | .                  | .                  | . | .         | . |
| Vv14g1567          | .                  | .            | Gorai.001G257300.1 | .                  | . | .         | . |
| Gorai.012G057200.1 | .                  | .            | .                  | .                  | . | .         | . |
| .                  | .                  | .            | .                  | .                  | . | .         | . |
| Vv14g1568          | .                  | .            | .                  | .                  | . | Gorai.    | . |
| 012G057100.1       | .                  | .            | .                  | .                  | . | .         | . |
| .                  | .                  | .            | .                  | .                  | . | .         | . |
| Vv14g1569          | .                  | .            | .                  | .                  | . | Gorai.    | . |
| 012G057000.1       | .                  | .            | .                  | .                  | . | .         | . |
| .                  | .                  | .            | .                  | .                  | . | .         | . |
| Vv14g1570          | .                  | .            | .                  | .                  | . | .         | . |
| .                  | .                  | .            | .                  | .                  | . | Vv1rg0202 | . |
| .                  | .                  | .            | .                  | .                  | . | .         | . |
| Vv14g1571          | .                  | .            | .                  | .                  | . | Gorai.    | . |
| 012G056900.1       | .                  | .            | .                  | .                  | . | .         | . |
| Vv1rg0201          | .                  | .            | .                  | .                  | . | .         | . |
| Vv14g1572          | .                  | .            | .                  | Gorai.007G036000.1 | . | .         | . |
| .                  | .                  | .            | .                  | .                  | . | .         | . |
| .                  | .                  | .            | .                  | .                  | . | .         | . |
| Vv14g1573          | .                  | .            | .                  | .                  | . | .         | . |
| .                  | .                  | .            | .                  | .                  | . | .         | . |
| .                  | .                  | .            | .                  | .                  | . | .         | . |
| Vv14g1574          | .                  | .            | .                  | .                  | . | .         | . |

|                    |                    |   |                    |   |                    |   |
|--------------------|--------------------|---|--------------------|---|--------------------|---|
| .                  | .                  | . | .                  | . | .                  | . |
| .                  | .                  | . | .                  | . | .                  | . |
| Vv14g1575          | .                  | . | .                  | . | .                  | . |
| .                  | .                  | . | .                  | . | .                  | . |
| Vv14g1576          | .                  | . | .                  | . | .                  | . |
| .                  | .                  | . | .                  | . | .                  | . |
| Vv14g1577          | .                  | . | .                  | . | .                  | . |
| .                  | .                  | . | .                  | . | .                  | . |
| Vv14g1578          | .                  | . | .                  | . | .                  | . |
| .                  | .                  | . | .                  | . | .                  | . |
| Vv14g1579          | .                  | . | .                  | . | .                  | . |
| .                  | .                  | . | .                  | . | .                  | . |
| Vv14g1580          | .                  | . | .                  | . | Gorai.006G023000.1 | . |
|                    | Gorai.012G055600.1 | . | Vv17g0643          | . | .                  | . |
| .                  | .                  | . | .                  | . | .                  | . |
| Vv14g1581          | .                  | . | .                  | . | .                  | . |
| .                  | .                  | . | .                  | . | .                  | . |
| Vv14g1582          | .                  | . | .                  | . | .                  | . |
| .                  | .                  | . | .                  | . | .                  | . |
| Vv14g1583          | .                  | . | .                  | . | .                  | . |
| .                  | .                  | . | .                  | . | .                  | . |
| Vv14g1584          | .                  | . | .                  | . | .                  | . |
| .                  | .                  | . | .                  | . | .                  | . |
| Vv14g1585          | .                  | . | .                  | . | .                  | . |
| .                  | .                  | . | .                  | . | .                  | . |
| Vv14g1586          | Tc05_g004120       | . | .                  | . | .                  | . |
| .                  | .                  | . | .                  | . | .                  | . |
| Vv14g1587          | .                  | . | .                  | . | .                  | . |
| .                  | .                  | . | .                  | . | .                  | . |
| Vv14g1588          | .                  | . | Gorai.001G256400.1 | . | .                  | . |
| .                  | .                  | . | .                  | . | .                  | . |
| Vv14g1589          | Tc05_g004140       | . | .                  | . | .                  | . |
| .                  | .                  | . | .                  | . | .                  | . |
| Vv14g1590          | Tc04_g008100       | . | .                  | . | .                  | . |
| Gorai.012G055500.1 | .                  | . | .                  | . | .                  | . |



|                    |                    |                    |                    |                    |                    |   |
|--------------------|--------------------|--------------------|--------------------|--------------------|--------------------|---|
| Vv14g1591          | .                  | .                  | .                  | Gorai.001G256300.1 | .                  | . |
| Gorai.006G022100.1 | .                  | .                  | Gorai.012G055400.1 | .                  | .                  | . |
| .                  | .                  | .                  | .                  | Vv1rg0191          | .                  | . |
| Vv14g1592          | .                  | .                  | .                  | .                  | Gorai.006G022000.1 | . |
| Gorai.012G055300.1 | .                  | .                  | .                  | .                  | .                  | . |
| .                  | .                  | .                  | .                  | .                  | .                  | . |
| Vv14g1593          | .                  | .                  | .                  | .                  | Gorai.006G021900.1 | . |
| Vv1rg0189          | .                  | .                  | .                  | .                  | .                  | . |
| Vv14g1594          | .                  | .                  | Gorai.001G256200.1 | .                  | Gorai.             | . |
| 007G036200.1       | Gorai.006G021800.1 | .                  | .                  | Vv17g0647          | .                  | . |
| Tc03_g009870       | .                  | .                  | Gorai.008G181800.1 | .                  | .                  | . |
| Vv1rg0186          | .                  | .                  | .                  | .                  | .                  | . |
| Vv14g1595          | .                  | .                  | .                  | .                  | .                  | . |
| .                  | .                  | .                  | .                  | .                  | .                  | . |
| Vv14g1596          | Tc05_g023350       | .                  | .                  | .                  | .                  | . |
| .                  | .                  | .                  | .                  | .                  | .                  | . |
| Vv14g1597          | .                  | .                  | Gorai.001G255600.1 | .                  | .                  | . |
| .                  | .                  | .                  | .                  | .                  | .                  | . |
| Vv14g1598          | .                  | .                  | .                  | .                  | .                  | . |
| .                  | .                  | .                  | .                  | .                  | .                  | . |
| Vv14g1599          | .                  | .                  | Gorai.001G238700.1 | .                  | Gorai.             | . |
| 007G036500.1       | Gorai.006G020700.1 | Gorai.012G055000.1 | .                  | .                  | .                  | . |
| Vv17g0651          | Tc03_g010150       | .                  | .                  | .                  | .                  | . |
| Vv1rg0180          | .                  | .                  | .                  | .                  | .                  | . |
| Vv14g1600          | .                  | .                  | .                  | Gorai.006G020600.1 | .                  | . |
| .                  | .                  | .                  | .                  | .                  | .                  | . |
| Vv14g1601          | .                  | .                  | .                  | Gorai.007G036700.1 | .                  | . |
| .                  | Vv17g0654          | Tc03_g010220       | .                  | .                  | .                  | . |
| .                  | .                  | .                  | .                  | .                  | .                  | . |
| Vv14g1602          | .                  | .                  | .                  | Gorai.006G020500.1 | .                  | . |
| .                  | .                  | .                  | .                  | .                  | .                  | . |
| Vv1rg0167          | .                  | .                  | .                  | .                  | .                  | . |
| Vv14g1603          | .                  | .                  | .                  | Gorai.006G018000.1 | .                  | . |
| .                  | .                  | .                  | .                  | .                  | .                  | . |
| Vv14g1604          | .                  | .                  | .                  | Gorai.007G036900.1 | .                  | . |
| .                  | .                  | .                  | .                  | .                  | .                  | . |
| Vv14g1605          | .                  | .                  | .                  | .                  | .                  | . |
| .                  | .                  | .                  | .                  | .                  | .                  | . |

|           |              |   |                    |                    |   |   |   |
|-----------|--------------|---|--------------------|--------------------|---|---|---|
| Vv14g1606 | .            | . | .                  | .                  | . | . | . |
| .         | .            | . | .                  | .                  | . | . | . |
| Vv14g1607 | .            | . | Gorai.001G238800.1 | .                  | . | . | . |
| .         | .            | . | .                  | .                  | . | . | . |
| Vv14g1608 | .            | . | .                  | Gorai.006G017900.1 | . | . | . |
| .         | .            | . | .                  | .                  | . | . | . |
| Vv14g1609 | .            | . | .                  | Gorai.006G017800.1 | . | . | . |
| .         | .            | . | .                  | .                  | . | . | . |
| Vv14g1610 | .            | . | .                  | Gorai.007G076400.1 | . | . | . |
| .         | .            | . | .                  | .                  | . | . | . |
| Vv14g1611 | .            | . | .                  | .                  | . | . | . |
| .         | .            | . | .                  | .                  | . | . | . |
| Vv14g1612 | .            | . | .                  | .                  | . | . | . |
| .         | .            | . | .                  | .                  | . | . | . |
| Vv14g1613 | .            | . | .                  | .                  | . | . | . |
| .         | .            | . | .                  | .                  | . | . | . |
| Vv14g1614 | .            | . | .                  | .                  | . | . | . |
| .         | .            | . | .                  | .                  | . | . | . |
| Vv14g1615 | Tc05_g004390 | . | .                  | .                  | . | . | . |
| .         | .            | . | .                  | .                  | . | . | . |
| Vv14g1616 | .            | . | .                  | .                  | . | . | . |
| .         | .            | . | .                  | .                  | . | . | . |
| Vv14g1617 | .            | . | .                  | .                  | . | . | . |
| .         | .            | . | .                  | .                  | . | . | . |
| Vv14g1618 | .            | . | .                  | .                  | . | . | . |
| .         | .            | . | .                  | .                  | . | . | . |
| Vv14g1619 | .            | . | .                  | .                  | . | . | . |
| .         | .            | . | .                  | .                  | . | . | . |
| Vv14g1620 | .            | . | .                  | .                  | . | . | . |
| .         | .            | . | .                  | .                  | . | . | . |
| Vv14g1621 | .            | . | .                  | .                  | . | . | . |
| .         | .            | . | .                  | .                  | . | . | . |
| Vv14g1622 | .            | . | .                  | .                  | . | . | . |

|                    |              |                    |                    |                    |           |   |
|--------------------|--------------|--------------------|--------------------|--------------------|-----------|---|
| .                  | .            | .                  | .                  | .                  | .         | . |
| .                  | .            | .                  | .                  | .                  | .         | . |
| Vv14g1623          | Tc04_g008890 | .                  | .                  | .                  | Gorai.    | . |
| 006G016800.1       | .            | .                  | .                  | .                  | .         | . |
| .                  | .            | .                  | .                  | .                  | .         | . |
| Vv14g1624          | .            | .                  | .                  | .                  | Gorai.    | . |
| 012G054100.1       | .            | .                  | .                  | .                  | .         | . |
| .                  | .            | .                  | .                  | .                  | .         | . |
| Vv14g1625          | Tc04_g008920 | .                  | .                  | Gorai.007G078900.1 | .         | . |
| Gorai.006G016700.1 | .            | Gorai.012G054000.1 | .                  | .                  | .         | . |
| .                  | .            | .                  | .                  | .                  | .         | . |
| .                  | .            | .                  | .                  | .                  | .         | . |
| Vv14g1626          | .            | .                  | .                  | .                  | .         | . |
| .                  | .            | .                  | .                  | .                  | .         | . |
| .                  | .            | .                  | .                  | .                  | .         | . |
| Vv14g1627          | .            | .                  | .                  | .                  | .         | . |
| .                  | .            | .                  | .                  | .                  | .         | . |
| .                  | .            | .                  | .                  | .                  | .         | . |
| Vv14g1628          | .            | .                  | .                  | .                  | .         | . |
| .                  | .            | .                  | .                  | .                  | .         | . |
| .                  | .            | .                  | .                  | .                  | .         | . |
| Vv14g1629          | .            | .                  | .                  | .                  | .         | . |
| .                  | .            | .                  | .                  | .                  | .         | . |
| .                  | .            | .                  | .                  | .                  | .         | . |
| Vv14g1630          | .            | .                  | .                  | .                  | .         | . |
| .                  | .            | .                  | .                  | .                  | Vv1rg0138 | . |
| .                  | .            | .                  | .                  | .                  | .         | . |
| Vv14g1631          | .            | .                  | Gorai.001G239100.1 | .                  | Gorai.    | . |
| 007G037300.1       | .            | .                  | Vv17g0681          | .                  | .         | . |
| .                  | .            | .                  | Vv1rg0137          | .                  | .         | . |
| .                  | .            | .                  | .                  | .                  | .         | . |
| Vv14g1632          | .            | .                  | .                  | .                  | .         | . |
| .                  | .            | .                  | .                  | .                  | .         | . |
| .                  | .            | .                  | .                  | .                  | .         | . |
| Vv14g1633          | .            | .                  | .                  | .                  | .         | . |
| .                  | .            | .                  | .                  | .                  | .         | . |
| .                  | .            | .                  | .                  | .                  | .         | . |
| Vv14g1634          | .            | .                  | .                  | .                  | .         | . |
| .                  | .            | .                  | .                  | .                  | .         | . |
| .                  | .            | .                  | .                  | .                  | .         | . |
| Vv14g1635          | Tc04_g001100 | .                  | .                  | .                  | .         | . |
| .                  | .            | .                  | .                  | .                  | .         | . |
| .                  | .            | .                  | .                  | .                  | .         | . |
| Vv14g1636          | .            | .                  | .                  | .                  | .         | . |
| .                  | .            | .                  | .                  | .                  | .         | . |
| .                  | .            | .                  | .                  | .                  | .         | . |
| Vv14g1637          | .            | .                  | .                  | .                  | .         | . |
| .                  | .            | .                  | .                  | .                  | .         | . |
| .                  | .            | .                  | .                  | .                  | .         | . |
| Vv14g1638          | .            | .                  | .                  | .                  | .         | . |

|                    |                    |   |                    |                    |        |   |   |
|--------------------|--------------------|---|--------------------|--------------------|--------|---|---|
| .                  | .                  | . | .                  | .                  | .      | . | . |
| .                  | .                  | . | .                  | .                  | .      | . | . |
| Vv14g1639          | .                  | . | .                  | Gorai.007G037800.1 | .      | . | . |
| .                  | .                  | . | .                  | .                  | .      | . | . |
| .                  | .                  | . | .                  | .                  | .      | . | . |
| Vv14g1640          | .                  | . | .                  | .                  | .      | . | . |
| Vv17g0688          | Tc03_g025210       | . | .                  | .                  | .      | . | . |
| .                  | .                  | . | .                  | .                  | .      | . | . |
| Vv14g1641          | .                  | . | .                  | .                  | .      | . | . |
| .                  | .                  | . | .                  | .                  | .      | . | . |
| .                  | .                  | . | .                  | .                  | .      | . | . |
| Vv14g1642          | .                  | . | .                  | .                  | .      | . | . |
| .                  | .                  | . | .                  | .                  | .      | . | . |
| .                  | .                  | . | .                  | .                  | .      | . | . |
| Vv14g1643          | Tc04_g008960       | . | .                  | .                  | Gorai. | . | . |
| 006G016600.1       | .                  | . | .                  | .                  | .      | . | . |
| .                  | Vv1rg0126          | . | .                  | .                  | .      | . | . |
| .                  | .                  | . | .                  | .                  | .      | . | . |
| Vv14g1644          | .                  | . | .                  | .                  | .      | . | . |
| .                  | .                  | . | .                  | .                  | .      | . | . |
| .                  | .                  | . | .                  | .                  | .      | . | . |
| Vv14g1645          | .                  | . | .                  | .                  | .      | . | . |
| .                  | .                  | . | .                  | .                  | .      | . | . |
| .                  | .                  | . | .                  | .                  | .      | . | . |
| Vv14g1646          | .                  | . | .                  | .                  | .      | . | . |
| .                  | .                  | . | .                  | .                  | .      | . | . |
| .                  | .                  | . | .                  | .                  | .      | . | . |
| Vv14g1647          | .                  | . | .                  | Gorai.007G079000.1 | .      | . | . |
| .                  | .                  | . | .                  | .                  | .      | . | . |
| .                  | .                  | . | .                  | .                  | .      | . | . |
| Vv14g1648          | Tc04_g009000       | . | .                  | .                  | .      | . | . |
| .                  | .                  | . | .                  | .                  | .      | . | . |
| .                  | .                  | . | .                  | .                  | .      | . | . |
| Vv14g1649          | .                  | . | .                  | .                  | .      | . | . |
| .                  | .                  | . | .                  | .                  | .      | . | . |
| .                  | .                  | . | .                  | .                  | .      | . | . |
| Vv14g1650          | Tc04_g009010       | . | .                  | Gorai.001G239200.1 | .      | . | . |
| Gorai.006G016400.1 | .                  | . | .                  | .                  | .      | . | . |
| .                  | .                  | . | .                  | .                  | .      | . | . |
| .                  | .                  | . | .                  | .                  | .      | . | . |
| Vv14g1651          | Tc04_g009020       | . | .                  | Gorai.007G079100.1 | .      | . | . |
| .                  | Gorai.012G053600.1 | . | .                  | .                  | .      | . | . |
| .                  | .                  | . | .                  | .                  | .      | . | . |
| .                  | .                  | . | .                  | .                  | .      | . | . |
| Vv14g1652          | .                  | . | .                  | .                  | .      | . | . |
| .                  | .                  | . | .                  | .                  | .      | . | . |
| .                  | .                  | . | .                  | .                  | .      | . | . |
| Vv14g1653          | Tc04_g009040       | . | .                  | Gorai.007G079200.1 | .      | . | . |
| Gorai.006G015600.1 | .                  | . | Gorai.012G053300.1 | .                  | .      | . | . |
| .                  | .                  | . | .                  | .                  | .      | . | . |
| .                  | .                  | . | .                  | .                  | .      | . | . |

|                    |                    |   |                    |                    |
|--------------------|--------------------|---|--------------------|--------------------|
| Vv14g1654          | Tc05_g004730       | . | .                  | Gorai.007G079300.1 |
|                    | Gorai.006G015500.1 | . | Vv17g0693          | .                  |
|                    | .                  | . | Vv1rg0123          | .                  |
| Vv14g1655          | .                  | . | .                  | .                  |
|                    | .                  | . | .                  | .                  |
| Vv14g1656          | .                  | . | Gorai.007G079700.1 | .                  |
| Gorai.006G015300.1 | Gorai.012G053200.1 | . | .                  | .                  |
|                    | .                  | . | .                  | .                  |
| Vv14g1657          | Tc04_g000970       | . | .                  | .                  |
|                    | .                  | . | .                  | .                  |
| Vv14g1658          | Tc04_g009150       | . | Gorai.001G239700.1 | .                  |
|                    | Gorai.006G015100.1 | . | Vv17g0699          | .                  |
|                    | Gorai.008G194200.1 | . | Vv1rg0119          | .                  |
|                    | .                  | . | .                  | .                  |
| Vv14g1659          | .                  | . | Gorai.             | .                  |
| 012G052900.1       | .                  | . | .                  | .                  |
|                    | .                  | . | .                  | .                  |
| Vv14g1660          | .                  | . | Gorai.006G014900.1 | .                  |
|                    | .                  | . | .                  | .                  |
| Vv14g1661          | .                  | . | Gorai.006G014800.1 | .                  |
|                    | Gorai.012G052800.1 | . | .                  | .                  |
|                    | Vv1rg0114          | . | .                  | .                  |
|                    | .                  | . | .                  | .                  |
| Vv14g1662          | Tc05_g004980       | . | .                  | .                  |
|                    | .                  | . | .                  | .                  |
|                    | .                  | . | .                  | .                  |
| Vv14g1663          | Tc04_g009200       | . | .                  | .                  |
| Gorai.012G052700.1 | .                  | . | .                  | .                  |
|                    | .                  | . | .                  | .                  |
| Vv14g1664          | Tc05_g020930       | . | .                  | .                  |
|                    | .                  | . | .                  | .                  |
|                    | .                  | . | .                  | .                  |
| Vv14g1665          | Tc04_g009220       | . | Gorai.007G079900.1 | .                  |
|                    | .                  | . | .                  | .                  |
|                    | .                  | . | .                  | .                  |
| Vv14g1666          | .                  | . | .                  | .                  |
|                    | .                  | . | .                  | .                  |
|                    | .                  | . | .                  | .                  |
| Vv14g1667          | Tc04_g009420       | . | .                  | .                  |
| Gorai.012G052500.1 | .                  | . | .                  | .                  |
|                    | .                  | . | .                  | .                  |
| Vv14g1668          | .                  | . | .                  | .                  |
|                    | .                  | . | .                  | .                  |
|                    | .                  | . | .                  | .                  |

|                    |                    |                    |                    |        |
|--------------------|--------------------|--------------------|--------------------|--------|
| Vv14g1669          | Tc04_g009470       | .                  | Gorai.001G240300.1 | .      |
| .                  | Gorai.012G052100.1 | .                  | .                  | .      |
| .                  | .                  | .                  | .                  | .      |
| .                  | .                  | .                  | .                  | .      |
| Vv14g1670          | Tc04_g009480       | .                  | Gorai.001G240400.1 | .      |
| .                  | .                  | .                  | .                  | .      |
| .                  | .                  | .                  | .                  | .      |
| .                  | .                  | .                  | .                  | .      |
| Vv14g1671          | Tc04_g009500       | .                  | .                  | .      |
| .                  | .                  | .                  | .                  | .      |
| .                  | .                  | .                  | .                  | .      |
| .                  | .                  | .                  | .                  | .      |
| Vv14g1672          | Tc04_g009520       | .                  | .                  | Gorai. |
| 006G014300.1       | Gorai.012G052000.1 | .                  | .                  | .      |
| .                  | .                  | .                  | .                  | .      |
| .                  | .                  | .                  | .                  | .      |
| Vv14g1673          | Tc04_g009560       | .                  | .                  | Gorai. |
| 006G014200.1       | Gorai.012G051900.1 | .                  | .                  | .      |
| .                  | .                  | .                  | .                  | .      |
| .                  | .                  | .                  | .                  | .      |
| Vv14g1674          | .                  | .                  | .                  | .      |
| .                  | .                  | .                  | .                  | .      |
| .                  | .                  | .                  | .                  | .      |
| .                  | .                  | .                  | .                  | .      |
| Vv14g1675          | Tc04_g009570       | .                  | Gorai.001G240600.1 | .      |
| Gorai.006G014100.1 | .                  | .                  | .                  | .      |
| .                  | .                  | .                  | .                  | .      |
| .                  | .                  | .                  | .                  | .      |
| Vv14g1676          | Tc04_g009590       | .                  | .                  | Gorai. |
| 006G014000.1       | .                  | .                  | .                  | .      |
| .                  | .                  | .                  | .                  | .      |
| .                  | .                  | .                  | .                  | .      |
| Vv14g1677          | Tc04_g009600       | .                  | Gorai.001G240700.1 | .      |
| Gorai.007G080000.1 | .                  | .                  | .                  | .      |
| .                  | .                  | .                  | .                  | .      |
| .                  | .                  | .                  | .                  | .      |
| Vv14g1678          | Tc04_g009610       | .                  | Gorai.001G240800.1 | .      |
| .                  | .                  | .                  | .                  | .      |
| .                  | .                  | .                  | .                  | .      |
| .                  | .                  | .                  | .                  | .      |
| Vv14g1679          | .                  | .                  | .                  | .      |
| .                  | .                  | .                  | .                  | .      |
| .                  | .                  | .                  | .                  | .      |
| .                  | .                  | .                  | .                  | .      |
| Vv14g1680          | Tc04_g009620       | .                  | Gorai.001G240900.1 | .      |
| Gorai.007G038300.1 | .                  | Gorai.012G051800.1 | Vv17g0722          | .      |
| .                  | .                  | Gorai.008G179200.1 | .                  | .      |
| .                  | .                  | .                  | .                  | .      |
| Vv14g1681          | .                  | .                  | .                  | .      |
| .                  | .                  | .                  | .                  | .      |
| .                  | .                  | .                  | .                  | .      |
| .                  | .                  | .                  | .                  | .      |
| Vv14g1682          | Tc04_g009640       | .                  | .                  | .      |
| Gorai.012G051600.1 | .                  | .                  | .                  | .      |
| .                  | .                  | .                  | .                  | .      |
| .                  | .                  | .                  | .                  | .      |
| Vv14g1683          | Tc04_g009650       | .                  | .                  | Gorai. |
| 006G013600.1       | .                  | .                  | .                  | .      |

|                    |                    |   |                    |   |
|--------------------|--------------------|---|--------------------|---|
| Vv14g1684          | Tc04_g009660       | . | Gorai.001G241000.1 | . |
| Gorai.007G080200.1 | Gorai.006G013500.1 | . | .                  | . |
| .                  | .                  | . | .                  | . |
| Vv14g1685          | Tc04_g009670       | . | Gorai.007G080300.1 | . |
| .                  | .                  | . | .                  | . |
| Vv14g1686          | Tc04_g009690       | . | Gorai.001G241100.1 | . |
| Gorai.007G080500.1 | Gorai.006G013400.1 | . | .                  | . |
| .                  | .                  | . | .                  | . |
| Vv14g1687          | Tc04_g009720       | . | Gorai.             | . |
| 006G013200.1       | .                  | . | .                  | . |
| .                  | .                  | . | .                  | . |
| Vv14g1688          | Tc05_g020810       | . | .                  | . |
| .                  | .                  | . | .                  | . |
| Vv14g1689          | Tc04_g009730       | . | .                  | . |
| Gorai.012G051400.1 | .                  | . | .                  | . |
| .                  | .                  | . | .                  | . |
| Vv14g1690          | .                  | . | .                  | . |
| .                  | .                  | . | .                  | . |
| Vv14g1691          | Tc04_g009750       | . | Gorai.007G080600.1 | . |
| .                  | .                  | . | .                  | . |
| Vv14g1692          | Tc04_g009760       | . | Gorai.007G080700.1 | . |
| .                  | Gorai.012G051300.1 | . | .                  | . |
| .                  | .                  | . | .                  | . |
| Vv14g1693          | Tc04_g009770       | . | Gorai.007G080800.1 | . |
| .                  | .                  | . | .                  | . |
| Vv14g1694          | Tc04_g009780       | . | Gorai.             | . |
| 006G013100.1       | Gorai.012G051200.1 | . | .                  | . |
| .                  | .                  | . | .                  | . |
| Vv14g1695          | .                  | . | .                  | . |
| .                  | .                  | . | .                  | . |
| Vv14g1696          | Tc04_g009800       | . | .                  | . |
| .                  | .                  | . | .                  | . |
| Vv14g1697          | Tc04_g009810       | . | .                  | . |
| Gorai.012G051000.1 | .                  | . | .                  | . |
| .                  | .                  | . | .                  | . |
| Vv14g1698          | Tc04_g009880       | . | Gorai.007G080900.1 | . |
| .                  | .                  | . | .                  | . |
| .                  | .                  | . | .                  | . |

|                                 |                                    |                    |                    |                    |        |
|---------------------------------|------------------------------------|--------------------|--------------------|--------------------|--------|
| Vv14g1699<br>006G012900.1       | Tc04_g009890                       | .                  | .                  | .                  | Gorai. |
| .                               | .                                  | .                  | .                  | .                  | .      |
| Vv14g1700                       | Tc04_g009910                       | .                  | .                  | Gorai.007G081000.1 | .      |
| .                               | .                                  | .                  | .                  | .                  | .      |
| Vv14g1701<br>006G012500.1       | Tc04_g010040<br>Gorai.012G050600.1 | .                  | .                  | .                  | Gorai. |
| .                               | .                                  | .                  | .                  | .                  | .      |
| Vv14g1702                       | .                                  | .                  | .                  | .                  | .      |
| .                               | .                                  | .                  | .                  | .                  | .      |
| Vv14g1703                       | Tc04_g010050                       | .                  | .                  | Gorai.007G081200.1 | .      |
| Gorai.006G012300.1              | Gorai.012G050400.1                 | .                  | .                  | .                  | .      |
| .                               | .                                  | .                  | .                  | .                  | .      |
| Vv14g1704                       | Tc04_g010060                       | .                  | .                  | Gorai.007G081300.1 | .      |
| .                               | .                                  | .                  | .                  | .                  | .      |
| Vv14g1705<br>006G012200.1       | Tc04_g010070<br>Gorai.012G050300.1 | .                  | .                  | .                  | Gorai. |
| .                               | .                                  | .                  | Vv17g0746          | .                  | .      |
| .                               | .                                  | .                  | .                  | .                  | .      |
| Vv14g1706                       | .                                  | .                  | .                  | .                  | .      |
| .                               | .                                  | .                  | .                  | .                  | .      |
| Vv14g1707<br>006G012000.1       | Tc04_g010090                       | .                  | .                  | .                  | Gorai. |
| .                               | .                                  | .                  | .                  | .                  | .      |
| Vv14g1708<br>006G011900.1       | Tc04_g010100                       | .                  | .                  | .                  | Gorai. |
| .                               | .                                  | .                  | .                  | .                  | .      |
| Vv14g1709<br>006G011800.1       | Tc04_g010110<br>Gorai.012G050100.1 | .                  | .                  | .                  | Gorai. |
| .                               | .                                  | .                  | .                  | .                  | .      |
| Vv14g1710                       | .                                  | .                  | .                  | .                  | .      |
| .                               | .                                  | .                  | .                  | .                  | .      |
| Vv14g1711<br>Gorai.007G040000.1 | Tc04_g010130                       | .                  | Gorai.001G243400.1 | .                  | .      |
| .                               | .                                  | Gorai.012G049900.1 | .                  | .                  | .      |
| .                               | .                                  | .                  | .                  | .                  | .      |
| Vv14g1712                       | Tc04_g010140                       | .                  | .                  | Gorai.007G081600.1 | .      |
| .                               | .                                  | .                  | .                  | .                  | .      |
| Vv14g1713                       | .                                  | .                  | Gorai.007G081700.1 | .                  | .      |
| .                               | .                                  | .                  | .                  | .                  | .      |
| .                               | .                                  | .                  | .                  | .                  | .      |



|                    |                    |                    |        |                    |        |
|--------------------|--------------------|--------------------|--------|--------------------|--------|
| Vv14g1714          | Tc04_g010150       | .                  | .      | .                  | Gorai. |
| 006G011600.1       | .                  | .                  | .      | .                  | .      |
| .                  | .                  | .                  | .      | .                  | .      |
| Vv14g1715          | .                  | .                  | .      | .                  | .      |
| .                  | .                  | .                  | .      | .                  | .      |
| .                  | .                  | .                  | .      | .                  | .      |
| Vv14g1716          | Tc04_g010170       | .                  | .      | .                  | Gorai. |
| 006G011500.1       | .                  | .                  | .      | .                  | .      |
| .                  | .                  | .                  | .      | .                  | .      |
| Vv14g1717          | Tc04_g010180       | .                  | .      | .                  | .      |
| Vv17g0749          | .                  | Gorai.001G078200.1 | .      | .                  | .      |
| .                  | .                  | .                  | .      | .                  | .      |
| .                  | .                  | .                  | .      | .                  | .      |
| Vv14g1718          | Tc04_g010190       | .                  | .      | .                  | .      |
| Gorai.012G049800.1 | .                  | .                  | .      | .                  | .      |
| .                  | .                  | .                  | .      | .                  | .      |
| Vv14g1719          | .                  | .                  | .      | .                  | .      |
| .                  | .                  | .                  | .      | .                  | .      |
| .                  | .                  | .                  | .      | .                  | .      |
| Vv14g1720          | Tc04_g010210       | .                  | .      | Gorai.007G081800.1 | .      |
| .                  | Vv17g0764          | Tc03_g011610       | Gorai. | .                  | .      |
| 001G077900.1       | .                  | Gorai.008G177900.1 | .      | .                  | .      |
| .                  | .                  | .                  | .      | .                  | .      |
| Vv14g1721          | .                  | .                  | .      | .                  | .      |
| .                  | .                  | .                  | .      | .                  | .      |
| .                  | .                  | .                  | .      | .                  | .      |
| Vv14g1722          | .                  | .                  | .      | .                  | .      |
| .                  | .                  | .                  | .      | .                  | .      |
| .                  | .                  | .                  | .      | .                  | .      |
| Vv14g1723          | Tc04_g010220       | .                  | .      | .                  | Gorai. |
| 006G011300.1       | Gorai.012G049600.1 | .                  | .      | .                  | .      |
| .                  | .                  | .                  | .      | .                  | .      |
| .                  | .                  | .                  | .      | .                  | .      |
| Vv14g1724          | .                  | .                  | .      | .                  | .      |
| .                  | .                  | .                  | .      | .                  | .      |
| .                  | .                  | .                  | .      | .                  | .      |
| Vv14g1725          | Tc04_g010230       | .                  | .      | Gorai.007G081900.1 | .      |
| Gorai.006G011200.1 | .                  | Gorai.012G049500.1 | .      | .                  | .      |
| .                  | .                  | .                  | .      | .                  | .      |
| .                  | .                  | .                  | .      | .                  | .      |
| Vv14g1726          | .                  | .                  | .      | .                  | .      |
| .                  | .                  | .                  | .      | .                  | .      |
| .                  | .                  | .                  | .      | .                  | .      |
| Vv14g1727          | Tc04_g010240       | .                  | .      | .                  | Gorai. |
| 006G011100.1       | Gorai.012G049300.1 | .                  | .      | .                  | .      |
| .                  | .                  | .                  | .      | .                  | .      |
| .                  | .                  | .                  | .      | .                  | .      |
| Vv14g1728          | Tc04_g010250       | .                  | .      | .                  | Gorai. |
| 006G010900.1       | .                  | .                  | .      | .                  | .      |
| .                  | .                  | .                  | .      | .                  | .      |

|           |              |   |   |                    |   |   |   |
|-----------|--------------|---|---|--------------------|---|---|---|
| Vv14g1729 | .            | . | . | .                  | . | . | . |
| .         | .            | . | . | .                  | . | . | . |
| Vv15g0001 | .            | . | . | .                  | . | . | . |
| .         | .            | . | . | .                  | . | . | . |
| Vv15g0002 | Tc01_g040010 | . | . | .                  | . | . | . |
| .         | .            | . | . | .                  | . | . | . |
| Vv15g0003 | .            | . | . | .                  | . | . | . |
| .         | .            | . | . | .                  | . | . | . |
| Vv15g0004 | .            | . | . | .                  | . | . | . |
| .         | .            | . | . | .                  | . | . | . |
| Vv15g0005 | .            | . | . | .                  | . | . | . |
| .         | .            | . | . | .                  | . | . | . |
| Vv15g0006 | Tc01_g009040 | . | . | .                  | . | . | . |
| .         | .            | . | . | .                  | . | . | . |
| Vv15g0007 | .            | . | . | .                  | . | . | . |
| .         | .            | . | . | .                  | . | . | . |
| Vv15g0008 | .            | . | . | .                  | . | . | . |
| .         | .            | . | . | .                  | . | . | . |
| Vv15g0009 | .            | . | . | .                  | . | . | . |
| .         | .            | . | . | .                  | . | . | . |
| Vv15g0010 | .            | . | . | .                  | . | . | . |
| .         | .            | . | . | .                  | . | . | . |
| Vv15g0011 | .            | . | . | .                  | . | . | . |
| .         | .            | . | . | .                  | . | . | . |
| Vv15g0012 | Tc01_g003310 | . | . | .                  | . | . | . |
| .         | .            | . | . | .                  | . | . | . |
| Vv15g0013 | .            | . | . | .                  | . | . | . |
| .         | .            | . | . | .                  | . | . | . |
| Vv15g0014 | .            | . | . | .                  | . | . | . |
| .         | .            | . | . | .                  | . | . | . |
| Vv15g0015 | .            | . | . | .                  | . | . | . |
| Vv02g0740 | .            | . | . | .                  | . | . | . |
| .         | .            | . | . | .                  | . | . | . |
| Vv15g0016 | Tc01_g003020 | . | . | Gorai.008G067300.1 | . | . | . |
| .         | .            | . | . | .                  | . | . | . |

|           |              |   |                    |                    |   |   |   |
|-----------|--------------|---|--------------------|--------------------|---|---|---|
| Vv15g0017 | .            | . | .                  | .                  | . | . | . |
| .         | .            | . | .                  | .                  | . | . | . |
| Vv15g0018 | .            | . | .                  | .                  | . | . | . |
| .         | .            | . | .                  | .                  | . | . | . |
| Vv15g0019 | .            | . | .                  | .                  | . | . | . |
| .         | .            | . | .                  | .                  | . | . | . |
| Vv15g0020 | .            | . | .                  | .                  | . | . | . |
| .         | .            | . | .                  | .                  | . | . | . |
| Vv15g0021 | .            | . | .                  | .                  | . | . | . |
| .         | .            | . | .                  | .                  | . | . | . |
| Vv15g0022 | .            | . | .                  | .                  | . | . | . |
| .         | .            | . | .                  | .                  | . | . | . |
| Vv15g0023 | .            | . | .                  | .                  | . | . | . |
| .         | .            | . | .                  | .                  | . | . | . |
| Vv15g0024 | .            | . | .                  | .                  | . | . | . |
| .         | .            | . | .                  | .                  | . | . | . |
| Vv15g0025 | .            | . | .                  | .                  | . | . | . |
| .         | .            | . | .                  | .                  | . | . | . |
| Vv15g0026 | Tc01_g008680 | . | .                  | .                  | . | . | . |
| Vv02g0704 | .            | . | Gorai.004G189000.1 | .                  | . | . | . |
| .         | .            | . | .                  | .                  | . | . | . |
| Vv15g0027 | .            | . | .                  | .                  | . | . | . |
| Vv02g0703 | .            | . | .                  | Gorai.008G229500.1 | . | . | . |
| .         | .            | . | .                  | .                  | . | . | . |
| Vv15g0028 | .            | . | .                  | .                  | . | . | . |
| .         | .            | . | .                  | .                  | . | . | . |
| Vv15g0029 | .            | . | .                  | .                  | . | . | . |
| .         | .            | . | .                  | .                  | . | . | . |
| Vv15g0030 | .            | . | .                  | .                  | . | . | . |
| .         | .            | . | .                  | .                  | . | . | . |
| Vv15g0031 | .            | . | .                  | .                  | . | . | . |
| .         | .            | . | .                  | .                  | . | . | . |
| Vv15g0032 | .            | . | .                  | .                  | . | . | . |
| .         | .            | . | .                  | .                  | . | . | . |
| .         | .            | . | .                  | .                  | . | . | . |

|              |                    |   |   |                    |   |        |   |
|--------------|--------------------|---|---|--------------------|---|--------|---|
| Vv15g0033    | .                  | . | . | .                  | . | .      | . |
| .            | .                  | . | . | .                  | . | .      | . |
| Vv15g0034    | .                  | . | . | .                  | . | .      | . |
| .            | .                  | . | . | .                  | . | .      | . |
| Vv15g0035    | Tc01_g040000       | . | . | Gorai.008G111700.1 | . | .      | . |
| .            | Gorai.004G168400.1 | . | . | .                  | . | .      | . |
| .            | .                  | . | . | .                  | . | .      | . |
| Vv15g0036    | .                  | . | . | .                  | . | .      | . |
| .            | .                  | . | . | .                  | . | .      | . |
| Vv15g0037    | .                  | . | . | .                  | . | Gorai. | . |
| 004G168200.1 | Vv02g0683          | . | . | Gorai.003G179700.1 | . | .      | . |
| .            | Gorai.006G215400.1 | . | . | .                  | . | .      | . |
| .            | .                  | . | . | .                  | . | .      | . |
| Vv15g0038    | .                  | . | . | .                  | . | .      | . |
| .            | .                  | . | . | .                  | . | .      | . |
| Vv15g0039    | Tc01_g039970       | . | . | .                  | . | .      | . |
| .            | .                  | . | . | .                  | . | .      | . |
| Vv15g0040    | .                  | . | . | .                  | . | .      | . |
| .            | .                  | . | . | .                  | . | .      | . |
| Vv15g0041    | .                  | . | . | .                  | . | .      | . |
| .            | .                  | . | . | .                  | . | .      | . |
| Vv15g0042    | .                  | . | . | .                  | . | .      | . |
| .            | .                  | . | . | .                  | . | .      | . |
| Vv15g0043    | .                  | . | . | .                  | . | .      | . |
| .            | .                  | . | . | .                  | . | .      | . |
| Vv15g0044    | Tc01_g008550       | . | . | .                  | . | .      | . |
| .            | .                  | . | . | .                  | . | .      | . |
| Vv15g0045    | .                  | . | . | Gorai.008G111600.1 | . | .      | . |
| .            | .                  | . | . | .                  | . | .      | . |
| Vv15g0046    | .                  | . | . | .                  | . | .      | . |
| .            | .                  | . | . | .                  | . | .      | . |
| Vv15g0047    | .                  | . | . | .                  | . | .      | . |
| .            | .                  | . | . | .                  | . | .      | . |
| Vv15g0048    | .                  | . | . | .                  | . | .      | . |
| .            | .                  | . | . | .                  | . | .      | . |
| .            | .                  | . | . | .                  | . | .      | . |

|                    |                    |                    |   |   |   |   |   |
|--------------------|--------------------|--------------------|---|---|---|---|---|
| Vv15g0049          | .                  | .                  | . | . | . | . | . |
| .                  | .                  | .                  | . | . | . | . | . |
| Vv15g0050          | .                  | .                  | . | . | . | . | . |
| .                  | .                  | .                  | . | . | . | . | . |
| Vv15g0051          | .                  | .                  | . | . | . | . | . |
| .                  | .                  | .                  | . | . | . | . | . |
| Vv15g0052          | .                  | .                  | . | . | . | . | . |
| .                  | .                  | .                  | . | . | . | . | . |
| Vv15g0053          | Tc01_g039940       | .                  | . | . | . | . | . |
| Gorai.004G168100.1 | .                  | .                  | . | . | . | . | . |
| .                  | .                  | .                  | . | . | . | . | . |
| Vv15g0054          | .                  | .                  | . | . | . | . | . |
| .                  | .                  | .                  | . | . | . | . | . |
| Vv15g0055          | .                  | .                  | . | . | . | . | . |
| .                  | .                  | .                  | . | . | . | . | . |
| Vv15g0056          | .                  | .                  | . | . | . | . | . |
| .                  | .                  | .                  | . | . | . | . | . |
| Vv15g0057          | .                  | .                  | . | . | . | . | . |
| .                  | .                  | .                  | . | . | . | . | . |
| Vv15g0058          | Tc01_g039930       | .                  | . | . | . | . | . |
| .                  | .                  | .                  | . | . | . | . | . |
| Vv15g0059          | .                  | .                  | . | . | . | . | . |
| .                  | .                  | .                  | . | . | . | . | . |
| Vv15g0060          | Gorai.004G168000.1 | Gorai.008G111300.1 | . | . | . | . | . |
| .                  | .                  | .                  | . | . | . | . | . |
| Vv15g0061          | .                  | .                  | . | . | . | . | . |
| .                  | .                  | .                  | . | . | . | . | . |
| Vv15g0062          | .                  | .                  | . | . | . | . | . |
| .                  | .                  | .                  | . | . | . | . | . |
| Vv15g0063          | .                  | .                  | . | . | . | . | . |
| .                  | .                  | .                  | . | . | . | . | . |
| Vv15g0064          | Tc01_g039900       | .                  | . | . | . | . | . |
| Gorai.004G167800.1 | .                  | .                  | . | . | . | . | . |
| .                  | .                  | .                  | . | . | . | . | . |
| Vv15g0065          | .                  | .                  | . | . | . | . | . |

|                    |                    |                    |                    |                    |        |   |   |
|--------------------|--------------------|--------------------|--------------------|--------------------|--------|---|---|
| .                  | .                  | .                  | .                  | .                  | .      | . | . |
| .                  | .                  | .                  | .                  | .                  | .      | . | . |
| Vv15g0066          | Tc01_g039890       | .                  | .                  | .                  | .      | . | . |
| Vv02g0660          | .                  | .                  | Gorai.004G190400.1 | .                  | Gorai. | . | . |
| 003G179300.1       | .                  | .                  | Gorai.006G215200.1 | .                  | .      | . | . |
| .                  | .                  | .                  | .                  | .                  | .      | . | . |
| Vv15g0067          | .                  | .                  | .                  | .                  | .      | . | . |
| .                  | .                  | .                  | .                  | .                  | .      | . | . |
| .                  | .                  | .                  | .                  | .                  | .      | . | . |
| Vv15g0068          | .                  | .                  | .                  | .                  | .      | . | . |
| .                  | .                  | .                  | .                  | .                  | .      | . | . |
| .                  | .                  | .                  | .                  | .                  | .      | . | . |
| Vv15g0069          | .                  | .                  | .                  | .                  | .      | . | . |
| .                  | .                  | .                  | .                  | .                  | .      | . | . |
| .                  | .                  | .                  | .                  | .                  | .      | . | . |
| Vv15g0070          | Tc01_g039870       | .                  | .                  | .                  | .      | . | . |
| .                  | .                  | .                  | .                  | .                  | .      | . | . |
| .                  | .                  | .                  | .                  | .                  | .      | . | . |
| Vv15g0071          | .                  | .                  | .                  | .                  | .      | . | . |
| .                  | .                  | .                  | .                  | .                  | .      | . | . |
| .                  | .                  | .                  | .                  | .                  | .      | . | . |
| Vv15g0072          | Tc01_g039860       | .                  | Gorai.008G111200.1 | .                  | .      | . | . |
| Gorai.004G038100.1 | .                  | .                  | Gorai.004G167700.1 | .                  | .      | . | . |
| .                  | .                  | .                  | .                  | .                  | .      | . | . |
| .                  | .                  | .                  | .                  | .                  | .      | . | . |
| Vv15g0073          | Tc01_g039850       | .                  | .                  | .                  | .      | . | . |
| .                  | .                  | .                  | .                  | .                  | .      | . | . |
| .                  | .                  | .                  | .                  | .                  | .      | . | . |
| Vv15g0074          | .                  | .                  | .                  | .                  | .      | . | . |
| .                  | .                  | .                  | .                  | .                  | .      | . | . |
| .                  | .                  | .                  | .                  | .                  | .      | . | . |
| Vv15g0075          | .                  | .                  | .                  | .                  | Gorai. | . | . |
| 004G167600.1       | .                  | .                  | .                  | .                  | .      | . | . |
| .                  | .                  | .                  | .                  | .                  | .      | . | . |
| Vv15g0076          | .                  | .                  | .                  | .                  | .      | . | . |
| .                  | .                  | .                  | .                  | .                  | .      | . | . |
| .                  | .                  | .                  | .                  | .                  | .      | . | . |
| Vv15g0077          | Tc01_g039840       | .                  | .                  | .                  | .      | . | . |
| Gorai.004G167500.1 | Vv02g0647          | .                  | .                  | Gorai.004G190800.1 | .      | . | . |
| .                  | .                  | .                  | Gorai.006G214900.1 | .                  | .      | . | . |
| .                  | .                  | .                  | .                  | .                  | .      | . | . |
| Vv15g0078          | Tc01_g039830       | .                  | Gorai.008G110800.1 | .                  | .      | . | . |
| .                  | Gorai.004G167400.1 | .                  | Vv02g0646          | .                  | .      | . | . |
| Gorai.004G190900.1 | .                  | .                  | .                  | Gorai.006G214800.1 | .      | . | . |
| .                  | .                  | .                  | .                  | .                  | .      | . | . |
| Vv15g0079          | Tc01_g039820       | .                  | Gorai.008G110700.1 | .                  | .      | . | . |
| Gorai.004G038500.1 | .                  | Gorai.004G167300.1 | .                  | Vv02g0642          | .      | . | . |
| .                  | .                  | .                  | .                  | .                  | .      | . | . |
| .                  | .                  | .                  | .                  | .                  | .      | . | . |
| Vv15g0080          | .                  | .                  | .                  | .                  | .      | . | . |

|                    |              |  |                    |  |  |
|--------------------|--------------|--|--------------------|--|--|
| Vv15g0081          | Tc01_g039810 |  |                    |  |  |
| Vv15g0082          |              |  |                    |  |  |
| Vv15g0083          |              |  |                    |  |  |
| Vv15g0084          | Tc01_g039800 |  | Gorai.008G110600.1 |  |  |
| Vv15g0085          |              |  |                    |  |  |
| Vv15g0086          | Tc01_g039790 |  | Gorai.008G110500.1 |  |  |
| Vv15g0087          |              |  |                    |  |  |
| Vv15g0088          | Tc01_g039780 |  |                    |  |  |
| Gorai.004G167200.1 |              |  |                    |  |  |
| Vv15g0089          | Tc01_g039770 |  | Gorai.008G110400.1 |  |  |
| Vv15g0090          | Tc01_g039760 |  |                    |  |  |
| Vv15g0091          | Tc01_g039750 |  |                    |  |  |
| Vv15g0092          |              |  |                    |  |  |
| Vv15g0093          |              |  |                    |  |  |
| Vv15g0094          | Tc01_g039740 |  |                    |  |  |
| Vv15g0095          |              |  |                    |  |  |
| Vv15g0096          |              |  |                    |  |  |

|                    |                    |   |   |                    |                    |        |   |
|--------------------|--------------------|---|---|--------------------|--------------------|--------|---|
| Vv15g0097          | .                  | . | . | .                  | .                  | .      | . |
| .                  | .                  | . | . | .                  | .                  | .      | . |
| Vv15g0098          | .                  | . | . | .                  | .                  | .      | . |
| .                  | .                  | . | . | .                  | .                  | .      | . |
| Vv15g0099          | .                  | . | . | .                  | .                  | .      | . |
| .                  | .                  | . | . | .                  | .                  | .      | . |
| Vv15g0100          | Tc01_g039560       | . | . | Gorai.008G109800.1 | .                  | .      | . |
| .                  | .                  | . | . | .                  | .                  | .      | . |
| Vv15g0101          | Tc01_g039540       | . | . | Gorai.008G109700.1 | .                  | .      | . |
| .                  | Gorai.004G167000.1 | . | . | .                  | .                  | .      | . |
| .                  | .                  | . | . | .                  | .                  | .      | . |
| Vv15g0102          | Tc01_g039530       | . | . | .                  | .                  | .      | . |
| .                  | .                  | . | . | .                  | .                  | .      | . |
| Vv15g0103          | .                  | . | . | .                  | .                  | .      | . |
| .                  | .                  | . | . | .                  | .                  | .      | . |
| Vv15g0104          | .                  | . | . | .                  | .                  | .      | . |
| .                  | .                  | . | . | .                  | .                  | .      | . |
| Vv15g0105          | .                  | . | . | .                  | .                  | .      | . |
| .                  | .                  | . | . | .                  | .                  | .      | . |
| Vv15g0106          | Tc01_g039520       | . | . | .                  | .                  | .      | . |
| Gorai.004G166900.1 | .                  | . | . | .                  | .                  | .      | . |
| .                  | .                  | . | . | .                  | .                  | .      | . |
| Vv15g0107          | .                  | . | . | .                  | .                  | .      | . |
| .                  | .                  | . | . | .                  | .                  | .      | . |
| Vv15g0108          | .                  | . | . | .                  | .                  | Gorai. | . |
| 004G166600.1       | .                  | . | . | .                  | .                  | .      | . |
| .                  | .                  | . | . | .                  | .                  | .      | . |
| Vv15g0109          | .                  | . | . | .                  | Gorai.004G038600.1 | .      | . |
| .                  | .                  | . | . | .                  | .                  | .      | . |
| Vv15g0110          | .                  | . | . | .                  | .                  | .      | . |
| .                  | .                  | . | . | .                  | .                  | .      | . |
| Vv15g0111          | Tc01_g039390       | . | . | Gorai.008G109500.1 | .                  | .      | . |
| .                  | .                  | . | . | .                  | .                  | .      | . |
| Vv15g0112          | .                  | . | . | .                  | .                  | .      | . |
| .                  | .                  | . | . | .                  | .                  | .      | . |
| Vv15g0113          | Tc01_g039350       | . | . | .                  | .                  | .      | . |



|                    |                    |   |   |                    |                    |   |   |
|--------------------|--------------------|---|---|--------------------|--------------------|---|---|
| .                  | .                  | . | . | .                  | .                  | . | . |
| .                  | .                  | . | . | .                  | .                  | . | . |
| Vv15g0114          | Tc01_g039340       | . | . | .                  | .                  | . | . |
| .                  | .                  | . | . | .                  | .                  | . | . |
| .                  | .                  | . | . | .                  | .                  | . | . |
| Vv15g0115          | .                  | . | . | .                  | Gorai.004G038700.1 | . | . |
| .                  | Gorai.004G166300.1 | . | . | .                  | .                  | . | . |
| .                  | .                  | . | . | .                  | .                  | . | . |
| .                  | .                  | . | . | .                  | .                  | . | . |
| Vv15g0116          | Tc01_g039330       | . | . | .                  | .                  | . | . |
| Gorai.004G166200.1 | .                  | . | . | .                  | .                  | . | . |
| .                  | .                  | . | . | .                  | .                  | . | . |
| Vv15g0117          | .                  | . | . | .                  | .                  | . | . |
| .                  | .                  | . | . | .                  | .                  | . | . |
| .                  | .                  | . | . | .                  | .                  | . | . |
| Vv15g0118          | .                  | . | . | .                  | Gorai.004G038800.1 | . | . |
| .                  | .                  | . | . | .                  | .                  | . | . |
| .                  | .                  | . | . | .                  | .                  | . | . |
| Vv15g0119          | .                  | . | . | .                  | .                  | . | . |
| .                  | .                  | . | . | .                  | .                  | . | . |
| .                  | .                  | . | . | .                  | .                  | . | . |
| Vv15g0120          | .                  | . | . | .                  | .                  | . | . |
| .                  | .                  | . | . | .                  | .                  | . | . |
| .                  | .                  | . | . | .                  | .                  | . | . |
| Vv15g0121          | .                  | . | . | .                  | .                  | . | . |
| .                  | .                  | . | . | .                  | .                  | . | . |
| .                  | .                  | . | . | .                  | .                  | . | . |
| Vv15g0122          | .                  | . | . | .                  | .                  | . | . |
| .                  | .                  | . | . | .                  | .                  | . | . |
| .                  | .                  | . | . | .                  | .                  | . | . |
| Vv15g0123          | .                  | . | . | .                  | .                  | . | . |
| .                  | .                  | . | . | .                  | .                  | . | . |
| .                  | .                  | . | . | .                  | .                  | . | . |
| Vv15g0124          | Tc01_g039320       | . | . | .                  | .                  | . | . |
| .                  | .                  | . | . | .                  | .                  | . | . |
| .                  | .                  | . | . | .                  | .                  | . | . |
| Vv15g0125          | .                  | . | . | .                  | .                  | . | . |
| .                  | .                  | . | . | .                  | .                  | . | . |
| .                  | .                  | . | . | .                  | .                  | . | . |
| Vv15g0126          | .                  | . | . | .                  | .                  | . | . |
| .                  | .                  | . | . | .                  | .                  | . | . |
| .                  | .                  | . | . | .                  | .                  | . | . |
| Vv15g0127          | .                  | . | . | .                  | .                  | . | . |
| .                  | .                  | . | . | .                  | .                  | . | . |
| .                  | .                  | . | . | .                  | .                  | . | . |
| Vv15g0128          | Tc01_g039310       | . | . | Gorai.008G109100.1 | .                  | . | . |
| .                  | .                  | . | . | .                  | .                  | . | . |
| .                  | .                  | . | . | .                  | .                  | . | . |
| Vv15g0129          | .                  | . | . | .                  | .                  | . | . |
| .                  | .                  | . | . | .                  | .                  | . | . |



|                    |              |   |                    |   |        |   |   |
|--------------------|--------------|---|--------------------|---|--------|---|---|
| Vv15g0146          | .            | . | .                  | . | .      | . | . |
| .                  | .            | . | .                  | . | .      | . | . |
| Vv15g0147          | .            | . | Gorai.008G108300.1 | . | .      | . | . |
| Gorai.004G165600.1 | .            | . | .                  | . | .      | . | . |
| .                  | .            | . | .                  | . | .      | . | . |
| Vv15g0148          | .            | . | .                  | . | .      | . | . |
| .                  | .            | . | .                  | . | .      | . | . |
| Vv15g0149          | .            | . | .                  | . | .      | . | . |
| .                  | .            | . | .                  | . | .      | . | . |
| Vv15g0150          | .            | . | .                  | . | .      | . | . |
| .                  | .            | . | .                  | . | .      | . | . |
| Vv15g0151          | .            | . | .                  | . | .      | . | . |
| .                  | .            | . | .                  | . | .      | . | . |
| Vv15g0152          | Tc01_g039110 | . | .                  | . | Gorai. | . | . |
| 004G039300.1       | .            | . | .                  | . | .      | . | . |
| Vv15g0153          | .            | . | Gorai.008G108200.1 | . | .      | . | . |
| .                  | .            | . | .                  | . | .      | . | . |
| Vv15g0154          | .            | . | .                  | . | .      | . | . |
| .                  | .            | . | .                  | . | .      | . | . |
| Vv15g0155          | .            | . | .                  | . | .      | . | . |
| .                  | .            | . | .                  | . | .      | . | . |
| Vv15g0156          | Tc01_g039090 | . | .                  | . | .      | . | . |
| Gorai.004G165500.1 | .            | . | .                  | . | .      | . | . |
| Vv15g0157          | Tc01_g039080 | . | .                  | . | .      | . | . |
| .                  | .            | . | .                  | . | .      | . | . |
| Vv15g0158          | Tc01_g039070 | . | .                  | . | .      | . | . |
| .                  | .            | . | .                  | . | .      | . | . |
| Vv15g0159          | Tc01_g039060 | . | .                  | . | .      | . | . |
| .                  | .            | . | .                  | . | .      | . | . |
| Vv15g0160          | .            | . | .                  | . | .      | . | . |
| .                  | .            | . | .                  | . | .      | . | . |
| Vv15g0161          | Tc01_g039050 | . | Gorai.008G108000.1 | . | .      | . | . |
| .                  | .            | . | .                  | . | .      | . | . |
| .                  | .            | . | .                  | . | .      | . | . |

|           |              |   |   |                    |                    |   |   |
|-----------|--------------|---|---|--------------------|--------------------|---|---|
| Vv15g0162 | .            | . | . | .                  | .                  | . | . |
| .         | .            | . | . | .                  | .                  | . | . |
| Vv15g0163 | .            | . | . | .                  | .                  | . | . |
| .         | .            | . | . | .                  | .                  | . | . |
| Vv15g0164 | Tc01_g039040 | . | . | Gorai.008G107900.1 | .                  | . | . |
| .         | .            | . | . | .                  | .                  | . | . |
| Vv15g0165 | .            | . | . | .                  | .                  | . | . |
| .         | .            | . | . | .                  | .                  | . | . |
| Vv15g0166 | .            | . | . | .                  | .                  | . | . |
| .         | .            | . | . | .                  | .                  | . | . |
| Vv15g0167 | .            | . | . | .                  | Gorai.004G039400.1 | . | . |
| .         | .            | . | . | .                  | .                  | . | . |
| Vv15g0168 | Tc01_g039030 | . | . | .                  | .                  | . | . |
| .         | .            | . | . | .                  | .                  | . | . |
| Vv15g0169 | .            | . | . | .                  | .                  | . | . |
| .         | .            | . | . | .                  | .                  | . | . |
| Vv15g0170 | .            | . | . | .                  | .                  | . | . |
| .         | .            | . | . | .                  | .                  | . | . |
| Vv15g0171 | .            | . | . | .                  | .                  | . | . |
| .         | .            | . | . | .                  | .                  | . | . |
| Vv15g0172 | .            | . | . | .                  | .                  | . | . |
| .         | .            | . | . | .                  | .                  | . | . |
| Vv15g0173 | .            | . | . | .                  | .                  | . | . |
| .         | .            | . | . | .                  | .                  | . | . |
| Vv15g0174 | .            | . | . | .                  | .                  | . | . |
| .         | .            | . | . | .                  | .                  | . | . |
| Vv15g0175 | .            | . | . | .                  | .                  | . | . |
| .         | .            | . | . | .                  | .                  | . | . |
| Vv15g0176 | Tc01_g038810 | . | . | .                  | .                  | . | . |
| .         | .            | . | . | .                  | .                  | . | . |
| Vv15g0177 | Tc01_g038800 | . | . | .                  | .                  | . | . |
| .         | .            | . | . | .                  | .                  | . | . |
| Vv15g0178 | .            | . | . | .                  | .                  | . | . |
| .         | .            | . | . | .                  | .                  | . | . |

|                    |                    |   |   |   |                    |   |
|--------------------|--------------------|---|---|---|--------------------|---|
| Vv15g0179          | Tc01_g017270       | . | . | . | .                  | . |
| .                  | .                  | . | . | . | .                  | . |
| Vv15g0180          | .                  | . | . | . | .                  | . |
| .                  | .                  | . | . | . | .                  | . |
| Vv15g0181          | .                  | . | . | . | .                  | . |
| .                  | .                  | . | . | . | .                  | . |
| Vv15g0182          | .                  | . | . | . | .                  | . |
| .                  | .                  | . | . | . | .                  | . |
| Vv15g0183          | Tc01_g038650       | . | . | . | .                  | . |
| .                  | .                  | . | . | . | .                  | . |
| Vv15g0184          | .                  | . | . | . | .                  | . |
| .                  | .                  | . | . | . | .                  | . |
| Vv15g0185          | Tc01_g038630       | . | . | . | Gorai.001G176400.1 | . |
| .                  | Gorai.004G165200.1 | . | . | . | .                  | . |
| .                  | .                  | . | . | . | .                  | . |
| Vv15g0186          | Tc01_g038620       | . | . | . | Gorai.             | . |
| 004G039600.1       | Gorai.004G165100.1 | . | . | . | .                  | . |
| .                  | .                  | . | . | . | .                  | . |
| Vv15g0187          | .                  | . | . | . | .                  | . |
| .                  | .                  | . | . | . | .                  | . |
| Vv15g0188          | .                  | . | . | . | Gorai.004G039700.1 | . |
| .                  | .                  | . | . | . | .                  | . |
| Vv15g0189          | .                  | . | . | . | .                  | . |
| .                  | .                  | . | . | . | .                  | . |
| Vv15g0190          | .                  | . | . | . | .                  | . |
| .                  | .                  | . | . | . | .                  | . |
| Vv15g0191          | Tc01_g038610       | . | . | . | .                  | . |
| Gorai.004G165000.1 | .                  | . | . | . | .                  | . |
| .                  | .                  | . | . | . | .                  | . |
| Vv15g0192          | Tc01_g038600       | . | . | . | .                  | . |
| .                  | .                  | . | . | . | .                  | . |
| Vv15g0193          | Tc01_g038590       | . | . | . | Gorai.008G107600.1 | . |
| .                  | .                  | . | . | . | .                  | . |
| Vv15g0194          | Tc01_g038570       | . | . | . | .                  | . |
| .                  | .                  | . | . | . | .                  | . |

|                    |              |   |                    |   |        |
|--------------------|--------------|---|--------------------|---|--------|
| Vv15g0195          | Tc01_g038560 | . | .                  | . | .      |
| .                  | .            | . | .                  | . | .      |
| Vv15g0196          | .            | . | .                  | . | .      |
| .                  | .            | . | .                  | . | .      |
| Vv15g0197          | Tc01_g011350 | . | .                  | . | .      |
| .                  | .            | . | .                  | . | .      |
| Vv15g0198          | Tc01_g038530 | . | .                  | . | .      |
| .                  | .            | . | .                  | . | .      |
| Vv15g0199          | .            | . | .                  | . | .      |
| .                  | .            | . | .                  | . | .      |
| Vv15g0200          | .            | . | .                  | . | .      |
| .                  | .            | . | .                  | . | .      |
| Vv15g0201          | .            | . | .                  | . | .      |
| .                  | .            | . | .                  | . | .      |
| Vv15g0202          | .            | . | .                  | . | Gorai. |
| 004G164800.1       | .            | . | .                  | . | .      |
| .                  | .            | . | .                  | . | .      |
| Vv15g0203          | .            | . | .                  | . | .      |
| .                  | .            | . | .                  | . | .      |
| Vv15g0204          | Tc01_g038490 | . | Gorai.008G107400.1 | . | .      |
| .                  | .            | . | .                  | . | .      |
| Vv15g0205          | Tc01_g038480 | . | Gorai.008G107300.1 | . | .      |
| Gorai.001G176000.1 | .            | . | .                  | . | .      |
| .                  | .            | . | .                  | . | .      |
| Vv15g0206          | .            | . | .                  | . | .      |
| .                  | .            | . | .                  | . | .      |
| Vv15g0207          | .            | . | .                  | . | .      |
| .                  | .            | . | .                  | . | .      |
| Vv15g0208          | .            | . | .                  | . | .      |
| .                  | .            | . | .                  | . | .      |
| Vv15g0209          | .            | . | .                  | . | .      |
| .                  | .            | . | .                  | . | .      |
| Vv15g0210          | .            | . | .                  | . | .      |
| .                  | .            | . | .                  | . | .      |
| .                  | .            | . | .                  | . | .      |

|                    |              |   |   |   |                    |   |   |
|--------------------|--------------|---|---|---|--------------------|---|---|
| Vv15g0211          | .            | . | . | . | .                  | . | . |
| .                  | .            | . | . | . | .                  | . | . |
| Vv15g0212          | .            | . | . | . | .                  | . | . |
| .                  | .            | . | . | . | .                  | . | . |
| Vv15g0213          | .            | . | . | . | .                  | . | . |
| .                  | .            | . | . | . | .                  | . | . |
| Vv15g0214          | .            | . | . | . | .                  | . | . |
| .                  | .            | . | . | . | .                  | . | . |
| Vv15g0215          | .            | . | . | . | .                  | . | . |
| .                  | .            | . | . | . | .                  | . | . |
| Vv15g0216          | .            | . | . | . | .                  | . | . |
| .                  | .            | . | . | . | .                  | . | . |
| Vv15g0217          | .            | . | . | . | .                  | . | . |
| .                  | .            | . | . | . | .                  | . | . |
| Vv15g0218          | .            | . | . | . | .                  | . | . |
| .                  | .            | . | . | . | .                  | . | . |
| Vv15g0219          | Tc01_g017110 | . | . | . | .                  | . | . |
| .                  | .            | . | . | . | .                  | . | . |
| Vv15g0220          | Tc01_g011440 | . | . | . | .                  | . | . |
| .                  | .            | . | . | . | .                  | . | . |
| Vv15g0221          | .            | . | . | . | Gorai.004G039800.1 | . | . |
| .                  | .            | . | . | . | .                  | . | . |
| Vv15g0222          | .            | . | . | . | .                  | . | . |
| .                  | .            | . | . | . | .                  | . | . |
| Vv15g0223          | .            | . | . | . | .                  | . | . |
| .                  | .            | . | . | . | .                  | . | . |
| Vv15g0224          | .            | . | . | . | .                  | . | . |
| .                  | .            | . | . | . | .                  | . | . |
| Vv15g0225          | .            | . | . | . | .                  | . | . |
| .                  | .            | . | . | . | .                  | . | . |
| Vv15g0226          | Tc01_g038420 | . | . | . | .                  | . | . |
| Gorai.004G164700.1 | .            | . | . | . | .                  | . | . |
| .                  | .            | . | . | . | .                  | . | . |
| Vv15g0227          | Tc01_g038410 | . | . | . | Gorai.001G175600.1 | . | . |
| .                  | .            | . | . | . | .                  | . | . |

|           |                                    |                                          |
|-----------|------------------------------------|------------------------------------------|
| Vv15g0228 | Tc01_g038400                       | Gorai.008G107100.1                       |
| Vv15g0229 |                                    |                                          |
| Vv15g0230 |                                    |                                          |
| Vv15g0231 |                                    |                                          |
| Vv15g0232 |                                    |                                          |
| Vv15g0233 | Tc01_g038380<br>Gorai.004G164500.1 | Gorai.008G107000.1                       |
| Vv15g0234 |                                    |                                          |
| Vv15g0235 |                                    |                                          |
| Vv15g0236 |                                    |                                          |
| Vv15g0237 | Tc01_g038360<br>Gorai.004G164400.1 |                                          |
| Vv15g0238 |                                    |                                          |
| Vv15g0239 | Tc01_g011460                       | Gorai.008G106900.1                       |
| Vv15g0240 |                                    |                                          |
| Vv15g0241 | Tc01_g038340<br>Gorai.004G164200.1 | Gorai.008G106700.1                       |
| Vv15g0242 | Tc01_g038310<br>Gorai.001G175500.1 | Gorai.008G106600.1<br>Gorai.004G039900.1 |
| Vv15g0243 | Tc01_g038300                       | Gorai.008G106500.1                       |



|                    |              |                    |                    |   |
|--------------------|--------------|--------------------|--------------------|---|
| Gorai.001G175400.1 | .            | Gorai.004G164000.1 | .                  | . |
| .                  | .            | .                  | .                  | . |
| Vv15g0244          | Tc01_g038290 | .                  | Gorai.001G175300.1 | . |
| .                  | .            | .                  | .                  | . |
| Vv15g0245          | Tc01_g038280 | .                  | Gorai.008G106400.1 | . |
| .                  | .            | .                  | .                  | . |
| Vv15g0246          | Tc01_g038270 | .                  | .                  | . |
| .                  | .            | .                  | .                  | . |
| Vv15g0247          | .            | .                  | .                  | . |
| .                  | .            | .                  | .                  | . |
| Vv15g0248          | .            | .                  | .                  | . |
| .                  | .            | .                  | .                  | . |
| Vv15g0249          | .            | .                  | .                  | . |
| .                  | .            | .                  | .                  | . |
| Vv15g0250          | .            | .                  | .                  | . |
| .                  | .            | .                  | .                  | . |
| Vv15g0251          | .            | .                  | .                  | . |
| .                  | .            | .                  | .                  | . |
| Vv15g0252          | .            | .                  | .                  | . |
| .                  | .            | .                  | .                  | . |
| Vv15g0253          | .            | .                  | .                  | . |
| .                  | .            | .                  | .                  | . |
| Vv15g0254          | .            | .                  | .                  | . |
| .                  | .            | .                  | .                  | . |
| Vv15g0255          | .            | .                  | .                  | . |
| .                  | .            | .                  | .                  | . |
| Vv15g0256          | .            | .                  | .                  | . |
| .                  | .            | .                  | .                  | . |
| Vv15g0257          | .            | .                  | .                  | . |
| .                  | .            | .                  | .                  | . |
| Vv15g0258          | .            | .                  | .                  | . |
| .                  | .            | .                  | .                  | . |
| Vv15g0259          | .            | .                  | .                  | . |
| .                  | .            | .                  | .                  | . |

|                    |                    |                    |                    |   |   |   |   |
|--------------------|--------------------|--------------------|--------------------|---|---|---|---|
| Vv15g0260          | .                  | .                  | .                  | . | . | . | . |
| .                  | .                  | .                  | .                  | . | . | . | . |
| Vv15g0261          | .                  | .                  | .                  | . | . | . | . |
| .                  | .                  | .                  | .                  | . | . | . | . |
| Vv15g0262          | .                  | .                  | .                  | . | . | . | . |
| .                  | .                  | .                  | .                  | . | . | . | . |
| Vv15g0263          | .                  | .                  | .                  | . | . | . | . |
| .                  | .                  | .                  | .                  | . | . | . | . |
| Vv15g0264          | Tc01_g038180       | .                  | .                  | . | . | . | . |
| .                  | .                  | .                  | .                  | . | . | . | . |
| Vv15g0265          | Tc01_g038170       | .                  | .                  | . | . | . | . |
| Gorai.004G163900.1 | .                  | .                  | .                  | . | . | . | . |
| .                  | .                  | .                  | .                  | . | . | . | . |
| Vv15g0266          | Tc01_g038160       | .                  | Gorai.008G113000.1 | . | . | . | . |
|                    | Gorai.004G040100.1 | Gorai.004G163800.1 | Vv02g0623          | . | . | . | . |
|                    | Tc03_g025100       | Gorai.004G163800.1 | Gorai.003G170900.1 | . | . | . | . |
|                    | Gorai.007G028100.1 | Gorai.008G235700.1 | Gorai.             | . | . | . | . |
| 006G213500.1       | .                  | .                  | .                  | . | . | . | . |
| Vv15g0267          | Tc01_g038150       | .                  | .                  | . | . | . | . |
| .                  | .                  | .                  | .                  | . | . | . | . |
| Vv15g0268          | Tc01_g038140       | .                  | Gorai.001G175000.1 | . | . | . | . |
| .                  | .                  | .                  | .                  | . | . | . | . |
| Vv15g0269          | Tc01_g038130       | .                  | Gorai.008G106100.1 | . | . | . | . |
|                    | Vv02g0616          | Tc03_g025170       | .                  | . | . | . | . |
| Gorai.003G170700.1 | .                  | .                  | .                  | . | . | . | . |
| .                  | .                  | .                  | .                  | . | . | . | . |
| Vv15g0270          | .                  | .                  | .                  | . | . | . | . |
| .                  | .                  | .                  | .                  | . | . | . | . |
| Vv15g0271          | .                  | .                  | .                  | . | . | . | . |
| .                  | .                  | .                  | .                  | . | . | . | . |
| Vv15g0272          | .                  | .                  | .                  | . | . | . | . |
| .                  | .                  | .                  | .                  | . | . | . | . |
| Vv15g0273          | .                  | .                  | .                  | . | . | . | . |
| .                  | .                  | .                  | .                  | . | . | . | . |
| Vv15g0274          | .                  | .                  | .                  | . | . | . | . |
| .                  | .                  | .                  | .                  | . | . | . | . |
| Vv15g0275          | .                  | .                  | .                  | . | . | . | . |

|           |              |  |                    |  |  |  |
|-----------|--------------|--|--------------------|--|--|--|
| Vv15g0276 |              |  |                    |  |  |  |
| Vv15g0277 |              |  |                    |  |  |  |
| Vv15g0278 |              |  | Gorai.008G113600.1 |  |  |  |
| Vv15g0279 |              |  |                    |  |  |  |
| Vv15g0280 |              |  | Gorai.008G113700.1 |  |  |  |
| Vv15g0281 |              |  | Gorai.008G113800.1 |  |  |  |
| Vv15g0282 |              |  |                    |  |  |  |
| Vv15g0283 |              |  |                    |  |  |  |
| Vv15g0284 |              |  |                    |  |  |  |
| Vv15g0285 |              |  |                    |  |  |  |
| Vv15g0286 |              |  |                    |  |  |  |
| Vv15g0287 |              |  |                    |  |  |  |
| Vv02g0601 | Tc03_g025320 |  | Gorai.003G170400.1 |  |  |  |
| Vv15g0288 |              |  |                    |  |  |  |
| Vv15g0289 |              |  |                    |  |  |  |
| Vv15g0290 |              |  |                    |  |  |  |
| Vv15g0291 |              |  |                    |  |  |  |

|                    |                    |                    |        |                    |        |   |
|--------------------|--------------------|--------------------|--------|--------------------|--------|---|
| Vv15g0292          | Tc01_g037990       | .                  | .      | .                  | .      | . |
| .                  | .                  | .                  | .      | .                  | .      | . |
| Vv15g0293          | .                  | .                  | .      | .                  | .      | . |
| .                  | .                  | .                  | .      | .                  | .      | . |
| Vv15g0294          | .                  | .                  | .      | .                  | .      | . |
| .                  | .                  | .                  | .      | .                  | .      | . |
| Vv15g0295          | .                  | .                  | .      | .                  | .      | . |
| .                  | .                  | .                  | .      | .                  | .      | . |
| Vv15g0296          | Tc01_g037960       | .                  | .      | .                  | .      | . |
| .                  | .                  | .                  | .      | .                  | .      | . |
| Vv15g0297          | Tc01_g037930       | .                  | .      | .                  | .      | . |
| Vv02g0566          | Tc03_g025600       | Gorai.004G201400.1 | .      | .                  | .      | . |
| Gorai.003G114700.1 | .                  | Gorai.008G238500.1 | Gorai. | .                  | .      | . |
| 006G212100.1       | .                  | .                  | .      | .                  | .      | . |
| Vv15g0298          | .                  | .                  | .      | .                  | .      | . |
| .                  | .                  | .                  | .      | .                  | .      | . |
| Vv15g0299          | Tc01_g037920       | Gorai.008G113200.1 | .      | .                  | .      | . |
| .                  | Vv02g0564          | Tc03_g025620       | Gorai. | .                  | .      | . |
| 004G201500.1       | Gorai.003G114800.1 | Gorai.007G090200.1 | .      | .                  | .      | . |
| Gorai.008G238600.1 | Gorai.006G212000.1 | .                  | .      | .                  | .      | . |
| Vv15g0300          | .                  | .                  | .      | .                  | .      | . |
| .                  | .                  | .                  | .      | .                  | .      | . |
| Vv15g0301          | .                  | .                  | .      | .                  | Gorai. | . |
| 004G163300.1       | .                  | .                  | .      | .                  | .      | . |
| Vv15g0302          | .                  | .                  | .      | .                  | .      | . |
| .                  | .                  | .                  | .      | .                  | .      | . |
| Vv15g0303          | .                  | .                  | .      | Gorai.001G174700.1 | .      | . |
| .                  | .                  | .                  | .      | .                  | .      | . |
| Vv15g0304          | .                  | .                  | .      | .                  | .      | . |
| .                  | .                  | .                  | .      | .                  | .      | . |
| Vv15g0305          | Tc01_g037860       | .                  | .      | .                  | Gorai. | . |
| 004G040500.1       | Gorai.004G163100.1 | .                  | .      | .                  | .      | . |
| .                  | .                  | .                  | .      | .                  | .      | . |
| Vv15g0306          | .                  | .                  | .      | .                  | .      | . |
| .                  | .                  | .                  | .      | .                  | .      | . |
| .                  | .                  | .                  | .      | .                  | .      | . |

|                    |                    |                    |                    |                    |        |   |   |
|--------------------|--------------------|--------------------|--------------------|--------------------|--------|---|---|
| Vv15g0307          | .                  | .                  | .                  | .                  | .      | . | . |
| .                  | .                  | .                  | .                  | .                  | .      | . | . |
| Vv15g0308          | .                  | .                  | .                  | .                  | .      | . | . |
| .                  | .                  | .                  | .                  | .                  | .      | . | . |
| Vv15g0309          | .                  | .                  | .                  | .                  | .      | . | . |
| .                  | .                  | .                  | .                  | .                  | .      | . | . |
| Vv15g0310          | .                  | .                  | .                  | .                  | .      | . | . |
| .                  | .                  | .                  | .                  | .                  | .      | . | . |
| Vv15g0311          | .                  | .                  | .                  | .                  | .      | . | . |
| .                  | .                  | .                  | .                  | .                  | .      | . | . |
| Vv15g0312          | .                  | .                  | Gorai.008G105800.1 | .                  | .      | . | . |
| .                  | .                  | .                  | .                  | .                  | .      | . | . |
| Vv15g0313          | .                  | .                  | .                  | .                  | .      | . | . |
| .                  | .                  | .                  | .                  | .                  | .      | . | . |
| Vv15g0314          | Tc01_g037770       | .                  | .                  | Gorai.001G174200.1 | .      | . | . |
|                    | Gorai.004G040700.1 | Gorai.004G162400.1 | .                  | Vv02g0542          | .      | . | . |
|                    | Tc03_g025870       | Gorai.004G162400.1 | .                  | Gorai.             | .      | . | . |
| 007G090600.1       | Gorai.008G284100.1 | Gorai.006G195900.1 | .                  | .                  | .      | . | . |
| .                  | .                  | .                  | .                  | .                  | .      | . | . |
| Vv15g0315          | Tc01_g037760       | .                  | .                  | .                  | .      | . | . |
| .                  | .                  | .                  | .                  | .                  | .      | . | . |
| Vv15g0316          | Tc01_g037750       | .                  | .                  | .                  | .      | . | . |
| .                  | .                  | .                  | .                  | .                  | .      | . | . |
| Vv15g0317          | Tc01_g037740       | .                  | Gorai.008G113900.1 | .                  | .      | . | . |
| .                  | Gorai.004G162000.1 | .                  | Vv02g0537          | .                  | .      | . | . |
| Tc03_g025910       | Gorai.004G162000.1 | .                  | .                  | .                  | Gorai. | . | . |
| 008G239700.1       | .                  | .                  | .                  | .                  | .      | . | . |
| .                  | .                  | .                  | .                  | .                  | .      | . | . |
| Vv15g0318          | Tc01_g037710       | .                  | Gorai.008G114100.1 | .                  | .      | . | . |
| Gorai.001G174100.1 | .                  | .                  | .                  | .                  | .      | . | . |
| .                  | .                  | .                  | .                  | .                  | .      | . | . |
| Vv15g0319          | .                  | .                  | .                  | .                  | .      | . | . |
| .                  | .                  | .                  | .                  | .                  | .      | . | . |
| Vv15g0320          | .                  | .                  | .                  | .                  | .      | . | . |
| .                  | .                  | .                  | .                  | .                  | .      | . | . |
| Vv15g0321          | .                  | .                  | .                  | .                  | .      | . | . |
| .                  | .                  | .                  | .                  | .                  | .      | . | . |
| .                  | .                  | .                  | .                  | .                  | .      | . | . |

|                    |                    |                    |                    |   |   |        |   |
|--------------------|--------------------|--------------------|--------------------|---|---|--------|---|
| Vv15g0322          | .                  | .                  | .                  | . | . | .      | . |
| .                  | .                  | .                  | .                  | . | . | .      | . |
| Vv15g0323          | Tc01_g007280       | .                  | .                  | . | . | .      | . |
| .                  | .                  | .                  | .                  | . | . | .      | . |
| Vv15g0324          | Tc01_g037530       | .                  | .                  | . | . | .      | . |
|                    | Vv02g0534          | Tc03_g026070       | Gorai.004G161300.1 | . | . | .      | . |
|                    | Gorai.007G021700.1 | Gorai.008G283600.1 | .                  | . | . | .      | . |
| .                  | .                  | .                  | .                  | . | . | .      | . |
| Vv15g0325          | .                  | .                  | .                  | . | . | Gorai. | . |
| 004G160800.1       | .                  | .                  | .                  | . | . | .      | . |
| .                  | .                  | .                  | .                  | . | . | .      | . |
| Vv15g0326          | .                  | .                  | .                  | . | . | .      | . |
| .                  | .                  | .                  | .                  | . | . | .      | . |
| Vv15g0327          | .                  | .                  | .                  | . | . | .      | . |
| .                  | .                  | .                  | .                  | . | . | .      | . |
| Vv15g0328          | Tc01_g037490       | .                  | .                  | . | . | .      | . |
| .                  | .                  | .                  | .                  | . | . | .      | . |
| Vv15g0329          | .                  | .                  | .                  | . | . | .      | . |
| .                  | .                  | .                  | .                  | . | . | .      | . |
| Vv15g0330          | Tc01_g037470       | .                  | .                  | . | . | .      | . |
| .                  | .                  | .                  | .                  | . | . | .      | . |
| Vv15g0331          | .                  | .                  | .                  | . | . | .      | . |
| .                  | .                  | .                  | .                  | . | . | .      | . |
| Vv15g0332          | .                  | .                  | .                  | . | . | .      | . |
| .                  | .                  | .                  | .                  | . | . | .      | . |
| Vv15g0333          | .                  | .                  | .                  | . | . | .      | . |
| .                  | .                  | .                  | .                  | . | . | .      | . |
| Vv15g0334          | .                  | .                  | .                  | . | . | .      | . |
| .                  | .                  | .                  | .                  | . | . | .      | . |
| Vv15g0335          | Tc01_g037430       | .                  | .                  | . | . | .      | . |
| Gorai.004G158000.1 | Vv02g0531          | Tc03_g026120       | Gorai.             | . | . | .      | . |
| 004G160700.1       | Gorai.007G091800.1 | Gorai.008G240700.1 | .                  | . | . | .      | . |
|                    | Gorai.006G211500.1 | .                  | .                  | . | . | .      | . |
| .                  | .                  | .                  | .                  | . | . | .      | . |
| Vv15g0336          | .                  | .                  | .                  | . | . | .      | . |
| .                  | .                  | .                  | .                  | . | . | .      | . |
| Vv15g0337          | .                  | .                  | .                  | . | . | .      | . |
| .                  | .                  | .                  | .                  | . | . | .      | . |

|                    |              |                    |                    |   |        |   |   |
|--------------------|--------------|--------------------|--------------------|---|--------|---|---|
| Vv15g0338          | .            | .                  | .                  | . | .      | . | . |
| .                  | .            | .                  | .                  | . | .      | . | . |
| Vv15g0339          | .            | .                  | .                  | . | .      | . | . |
| .                  | .            | .                  | .                  | . | .      | . | . |
| Vv15g0340          | .            | .                  | .                  | . | .      | . | . |
| .                  | .            | .                  | .                  | . | .      | . | . |
| Vv15g0341          | .            | .                  | Gorai.008G114200.1 | . | .      | . | . |
| .                  | .            | .                  | .                  | . | .      | . | . |
| Vv15g0342          | Tc01_g007270 | .                  | .                  | . | Gorai. | . | . |
| 004G040800.1       | .            | .                  | .                  | . | .      | . | . |
| .                  | .            | .                  | .                  | . | .      | . | . |
| Vv15g0343          | .            | .                  | .                  | . | .      | . | . |
| .                  | .            | .                  | .                  | . | .      | . | . |
| Vv15g0344          | .            | .                  | Gorai.001G174000.1 | . | .      | . | . |
| .                  | .            | .                  | .                  | . | .      | . | . |
| Vv15g0345          | .            | .                  | .                  | . | .      | . | . |
| .                  | .            | .                  | .                  | . | .      | . | . |
| Vv15g0346          | .            | .                  | .                  | . | .      | . | . |
| .                  | .            | .                  | .                  | . | .      | . | . |
| Vv15g0347          | .            | .                  | Gorai.001G173900.1 | . | .      | . | . |
| .                  | .            | .                  | .                  | . | .      | . | . |
| Vv15g0348          | .            | .                  | Gorai.001G173700.1 | . | .      | . | . |
| .                  | .            | .                  | .                  | . | .      | . | . |
| Vv15g0349          | .            | .                  | .                  | . | Gorai. | . | . |
| 004G156300.1       | .            | .                  | .                  | . | .      | . | . |
| .                  | .            | .                  | .                  | . | .      | . | . |
| Vv15g0350          | .            | .                  | .                  | . | .      | . | . |
| .                  | .            | .                  | .                  | . | .      | . | . |
| Vv15g0351          | .            | .                  | .                  | . | .      | . | . |
| Vv02g0465          | Tc03_g026680 | Gorai.004G207700.1 | .                  | . | .      | . | . |
| Gorai.008G243500.1 | .            | .                  | .                  | . | .      | . | . |
| .                  | .            | .                  | .                  | . | .      | . | . |
| Vv15g0352          | .            | Gorai.008G116300.1 | .                  | . | .      | . | . |
| Gorai.004G156100.1 | .            | Vv02g0467          | Tc03_g026670       | . | .      | . | . |
| .                  | .            | Gorai.006G210200.1 | .                  | . | .      | . | . |
| .                  | .            | .                  | .                  | . | .      | . | . |
| Vv15g0353          | .            | .                  | .                  | . | Gorai. | . | . |
| 004G156000.1       | .            | .                  | .                  | . | .      | . | . |

|                    |                    |                    |                    |   |        |   |   |
|--------------------|--------------------|--------------------|--------------------|---|--------|---|---|
| Vv15g0354          | .                  | .                  | .                  | . | .      | . | . |
| .                  | .                  | .                  | .                  | . | .      | . | . |
| Vv15g0355          | .                  | .                  | Gorai.008G115900.1 | . | .      | . | . |
| .                  | Vv02g0473          | .                  | Tc03_g026620       | . | Gorai. | . | . |
| 003G162900.1       | .                  | Gorai.008G243400.1 | .                  | . | .      | . | . |
| .                  | .                  | .                  | .                  | . | .      | . | . |
| Vv15g0356          | .                  | .                  | Gorai.008G115800.1 | . | .      | . | . |
| .                  | Gorai.004G155900.1 | .                  | .                  | . | .      | . | . |
| .                  | .                  | .                  | .                  | . | .      | . | . |
| .                  | .                  | .                  | .                  | . | .      | . | . |
| Vv15g0357          | .                  | .                  | .                  | . | .      | . | . |
| .                  | .                  | .                  | .                  | . | .      | . | . |
| .                  | .                  | .                  | .                  | . | .      | . | . |
| Vv15g0358          | .                  | .                  | .                  | . | .      | . | . |
| .                  | .                  | .                  | .                  | . | .      | . | . |
| .                  | .                  | .                  | .                  | . | .      | . | . |
| Vv15g0359          | .                  | .                  | .                  | . | .      | . | . |
| .                  | .                  | .                  | .                  | . | .      | . | . |
| .                  | .                  | .                  | .                  | . | .      | . | . |
| Vv15g0360          | .                  | .                  | .                  | . | .      | . | . |
| .                  | .                  | .                  | .                  | . | .      | . | . |
| .                  | .                  | .                  | .                  | . | .      | . | . |
| Vv15g0361          | .                  | .                  | .                  | . | .      | . | . |
| .                  | .                  | .                  | .                  | . | .      | . | . |
| .                  | .                  | .                  | .                  | . | .      | . | . |
| Vv15g0362          | .                  | .                  | .                  | . | .      | . | . |
| .                  | .                  | .                  | .                  | . | .      | . | . |
| .                  | .                  | .                  | .                  | . | .      | . | . |
| Vv15g0363          | .                  | .                  | .                  | . | .      | . | . |
| Vv02g0478          | Tc03_g026580       | Gorai.004G206900.1 | .                  | . | .      | . | . |
| Gorai.007G094200.1 | Gorai.008G243000.1 | Gorai.006G197000.1 | .                  | . | .      | . | . |
| .                  | .                  | .                  | .                  | . | .      | . | . |
| Vv15g0364          | .                  | Gorai.008G115700.1 | .                  | . | .      | . | . |
| .                  | Vv02g0481          | Tc03_g026510       | Gorai.004G206700.1 | . | .      | . | . |
| .                  | Gorai.007G094100.1 | .                  | .                  | . | .      | . | . |
| .                  | .                  | .                  | .                  | . | .      | . | . |
| Vv15g0365          | .                  | .                  | .                  | . | .      | . | . |
| .                  | .                  | .                  | .                  | . | .      | . | . |
| .                  | .                  | .                  | .                  | . | .      | . | . |
| Vv15g0366          | .                  | .                  | .                  | . | .      | . | . |
| .                  | .                  | .                  | .                  | . | .      | . | . |
| .                  | .                  | .                  | .                  | . | .      | . | . |
| Vv15g0367          | .                  | .                  | .                  | . | .      | . | . |
| .                  | .                  | .                  | .                  | . | .      | . | . |
| .                  | .                  | .                  | .                  | . | .      | . | . |
| Vv15g0368          | Tc01_g037040       | Gorai.008G115400.1 | .                  | . | .      | . | . |
| .                  | .                  | .                  | .                  | . | .      | . | . |
| .                  | .                  | .                  | .                  | . | .      | . | . |



|                    |                    |                    |                    |   |   |
|--------------------|--------------------|--------------------|--------------------|---|---|
| Vv15g0369          | Tc01_g037030       | .                  | .                  | . | . |
| .                  | .                  | .                  | .                  | . | . |
| Vv15g0370          | Tc01_g037020       | .                  | Gorai.008G115500.1 | . | . |
| .                  | .                  | .                  | .                  | . | . |
| Vv15g0371          | .                  | .                  | .                  | . | . |
| .                  | .                  | .                  | .                  | . | . |
| Vv15g0372          | .                  | .                  | .                  | . | . |
| .                  | .                  | .                  | .                  | . | . |
| Vv15g0373          | .                  | Gorai.008G115300.1 | .                  | . | . |
| .                  | .                  | .                  | .                  | . | . |
| Vv15g0374          | .                  | .                  | .                  | . | . |
| .                  | .                  | .                  | .                  | . | . |
| Vv15g0375          | .                  | .                  | .                  | . | . |
| Vv02g0484          | Tc03_g026480       | .                  | Gorai.003G163900.1 | . | . |
| Gorai.007G009800.1 | Gorai.008G242500.1 | .                  | .                  | . | . |
| .                  | .                  | .                  | .                  | . | . |
| Vv15g0376          | .                  | .                  | .                  | . | . |
| .                  | .                  | .                  | .                  | . | . |
| Vv15g0377          | .                  | .                  | .                  | . | . |
| .                  | .                  | .                  | .                  | . | . |
| Vv15g0378          | .                  | .                  | .                  | . | . |
| .                  | .                  | .                  | .                  | . | . |
| Vv15g0379          | .                  | .                  | .                  | . | . |
| .                  | .                  | .                  | .                  | . | . |
| Vv15g0380          | Tc01_g021930       | .                  | .                  | . | . |
| Gorai.004G155600.1 | .                  | .                  | .                  | . | . |
| .                  | .                  | .                  | .                  | . | . |
| Vv15g0381          | .                  | .                  | .                  | . | . |
| .                  | .                  | .                  | .                  | . | . |
| Vv15g0382          | .                  | .                  | .                  | . | . |
| .                  | .                  | .                  | .                  | . | . |
| Vv15g0383          | .                  | .                  | .                  | . | . |
| Vv02g0492          | Tc03_g026410       | .                  | Gorai.003G164300.1 | . | . |
| .                  | .                  | .                  | .                  | . | . |
| Vv15g0384          | .                  | Gorai.008G115100.1 | .                  | . | . |
| .                  | .                  | .                  | .                  | . | . |
| .                  | .                  | .                  | .                  | . | . |

|           |              |   |   |                    |   |   |   |
|-----------|--------------|---|---|--------------------|---|---|---|
| Vv15g0385 | .            | . | . | .                  | . | . | . |
| .         | .            | . | . | .                  | . | . | . |
| Vv15g0386 | .            | . | . | .                  | . | . | . |
| .         | .            | . | . | .                  | . | . | . |
| Vv15g0387 | .            | . | . | .                  | . | . | . |
| .         | .            | . | . | .                  | . | . | . |
| Vv15g0388 | .            | . | . | .                  | . | . | . |
| .         | .            | . | . | .                  | . | . | . |
| Vv15g0389 | .            | . | . | .                  | . | . | . |
| .         | .            | . | . | .                  | . | . | . |
| Vv15g0390 | .            | . | . | .                  | . | . | . |
| .         | .            | . | . | .                  | . | . | . |
| Vv15g0391 | .            | . | . | .                  | . | . | . |
| .         | .            | . | . | .                  | . | . | . |
| Vv15g0392 | .            | . | . | .                  | . | . | . |
| .         | .            | . | . | .                  | . | . | . |
| Vv15g0393 | .            | . | . | Gorai.008G115000.1 | . | . | . |
| .         | .            | . | . | .                  | . | . | . |
| Vv15g0394 | .            | . | . | Gorai.001G173300.1 | . | . | . |
| .         | .            | . | . | .                  | . | . | . |
| Vv15g0395 | .            | . | . | .                  | . | . | . |
| .         | .            | . | . | .                  | . | . | . |
| Vv15g0396 | .            | . | . | .                  | . | . | . |
| .         | .            | . | . | .                  | . | . | . |
| Vv15g0397 | .            | . | . | .                  | . | . | . |
| .         | .            | . | . | .                  | . | . | . |
| Vv15g0398 | .            | . | . | .                  | . | . | . |
| .         | .            | . | . | .                  | . | . | . |
| Vv15g0399 | .            | . | . | .                  | . | . | . |
| .         | .            | . | . | .                  | . | . | . |
| Vv15g0400 | .            | . | . | .                  | . | . | . |
| .         | .            | . | . | .                  | . | . | . |
| Vv15g0401 | Tc01_g034320 | . | . | .                  | . | . | . |
| .         | .            | . | . | .                  | . | . | . |

|              |              |  |  |  |  |        |  |
|--------------|--------------|--|--|--|--|--------|--|
| Vv15g0402    |              |  |  |  |  |        |  |
| Vv15g0403    |              |  |  |  |  |        |  |
| Vv15g0404    |              |  |  |  |  |        |  |
| Vv15g0405    |              |  |  |  |  |        |  |
| Vv15g0406    |              |  |  |  |  |        |  |
| Vv15g0407    | Tc01_g021730 |  |  |  |  |        |  |
| Vv15g0408    |              |  |  |  |  |        |  |
| Vv15g0409    |              |  |  |  |  |        |  |
| Vv15g0410    | Tc01_g021630 |  |  |  |  |        |  |
| Vv15g0411    |              |  |  |  |  |        |  |
| Vv15g0412    |              |  |  |  |  |        |  |
| Vv15g0413    |              |  |  |  |  |        |  |
| Vv02g0512    |              |  |  |  |  |        |  |
| Vv15g0414    |              |  |  |  |  |        |  |
| Vv15g0415    |              |  |  |  |  |        |  |
| Vv15g0416    |              |  |  |  |  |        |  |
| Vv15g0417    |              |  |  |  |  | Gorai. |  |
| 004G155500.1 |              |  |  |  |  |        |  |
| Vv15g0418    |              |  |  |  |  |        |  |

|                    |                    |                    |  |  |  |
|--------------------|--------------------|--------------------|--|--|--|
| Vv15g0419          | Tc01_g037280       |                    |  |  |  |
| Vv15g0420          | Tc01_g037270       |                    |  |  |  |
| Vv15g0421          | Tc01_g037260       |                    |  |  |  |
| Gorai.004G155400.1 |                    |                    |  |  |  |
| Vv15g0422          |                    |                    |  |  |  |
| Vv15g0423          | Tc01_g037250       |                    |  |  |  |
| Vv15g0424          | Tc01_g037240       |                    |  |  |  |
| Vv15g0425          |                    |                    |  |  |  |
| Vv15g0426          |                    |                    |  |  |  |
| Vv15g0427          |                    |                    |  |  |  |
| Vv15g0428          | Tc01_g004660       |                    |  |  |  |
| Vv15g0429          |                    |                    |  |  |  |
| Vv02g0514          | Tc03_g026260       | Gorai.004G204600.1 |  |  |  |
| Gorai.007G092400.1 | Gorai.008G241800.1 |                    |  |  |  |
| Vv15g0430          |                    | Gorai.008G114900.1 |  |  |  |
| Vv15g0431          |                    |                    |  |  |  |
| Vv15g0432          | Tc01_g004600       | Gorai.008G112900.1 |  |  |  |
| Gorai.003G021400.1 |                    |                    |  |  |  |
| Vv15g0433          | Tc01_g036870       |                    |  |  |  |
| Vv15g0434          | Tc01_g036850       |                    |  |  |  |

|                    |              |  |  |                    |  |  |
|--------------------|--------------|--|--|--------------------|--|--|
| Vv15g0435          |              |  |  |                    |  |  |
| Vv15g0436          | Tc01_g004480 |  |  | Gorai.008G073100.1 |  |  |
| Vv15g0437          | Tc01_g036830 |  |  |                    |  |  |
| Vv15g0438          |              |  |  |                    |  |  |
| Vv15g0439          |              |  |  |                    |  |  |
| Vv15g0440          | Tc01_g034130 |  |  |                    |  |  |
| Vv15g0441          | Tc01_g036810 |  |  |                    |  |  |
| Gorai.004G156500.1 |              |  |  |                    |  |  |
| Vv15g0442          |              |  |  |                    |  |  |
| Vv15g0443          |              |  |  |                    |  |  |
| Vv15g0444          | Tc01_g036790 |  |  | Gorai.001G171700.1 |  |  |
| Vv15g0445          | Tc01_g036780 |  |  |                    |  |  |
| Vv15g0446          | Tc01_g036750 |  |  |                    |  |  |
| Gorai.004G156600.1 |              |  |  |                    |  |  |
| Vv15g0447          | Tc01_g036730 |  |  |                    |  |  |
| Vv15g0448          | Tc01_g036720 |  |  |                    |  |  |
| Vv15g0449          | Tc01_g036710 |  |  |                    |  |  |
| Vv15g0450          | Tc01_g036700 |  |  | Gorai.001G171500.1 |  |  |

|                    |                    |                    |                    |                    |
|--------------------|--------------------|--------------------|--------------------|--------------------|
| Vv15g0451          | Tc01_g036690       | .                  | .                  | Gorai.001G171000.1 |
| .                  | .                  | Vv02g0528          | Tc03_g026150       | .                  |
| .                  | Gorai.007G092100.1 | Gorai.008G241000.1 | .                  | .                  |
| Vv15g0452          | Tc01_g036680       | .                  | .                  | .                  |
| .                  | .                  | .                  | .                  | .                  |
| Vv15g0453          | Tc01_g036670       | .                  | .                  | .                  |
| .                  | .                  | .                  | .                  | .                  |
| Vv15g0454          | Tc01_g036660       | .                  | .                  | .                  |
| .                  | .                  | .                  | .                  | .                  |
| Vv15g0455          | .                  | .                  | .                  | .                  |
| .                  | .                  | .                  | .                  | .                  |
| Vv15g0456          | .                  | .                  | .                  | .                  |
| .                  | .                  | .                  | .                  | .                  |
| Vv15g0457          | .                  | .                  | Gorai.001G168700.1 | .                  |
| .                  | .                  | .                  | .                  | .                  |
| Vv15g0458          | .                  | .                  | .                  | .                  |
| .                  | .                  | .                  | .                  | .                  |
| Vv15g0459          | Tc01_g036640       | .                  | .                  | .                  |
| .                  | .                  | .                  | .                  | .                  |
| Vv15g0460          | Tc01_g036630       | .                  | .                  | .                  |
| .                  | .                  | .                  | .                  | .                  |
| Vv15g0461          | Tc01_g036620       | .                  | .                  | .                  |
| Gorai.004G156800.1 | .                  | .                  | .                  | .                  |
| Vv15g0462          | Tc01_g036610       | .                  | .                  | .                  |
| .                  | .                  | .                  | .                  | .                  |
| Vv15g0463          | .                  | .                  | .                  | .                  |
| .                  | .                  | .                  | .                  | .                  |
| Vv15g0464          | .                  | .                  | .                  | .                  |
| .                  | .                  | .                  | .                  | .                  |
| Vv15g0465          | .                  | .                  | .                  | .                  |
| .                  | .                  | .                  | .                  | .                  |
| Vv15g0466          | .                  | .                  | .                  | .                  |
| .                  | .                  | .                  | .                  | .                  |
| Vv15g0467          | .                  | .                  | .                  | .                  |

|              |              |   |   |   |   |        |   |
|--------------|--------------|---|---|---|---|--------|---|
| .            | .            | . | . | . | . | .      | . |
| .            | .            | . | . | . | . | .      | . |
| Vv15g0468    | .            | . | . | . | . | .      | . |
| .            | .            | . | . | . | . | .      | . |
| Vv15g0469    | .            | . | . | . | . | .      | . |
| .            | .            | . | . | . | . | .      | . |
| Vv15g0470    | .            | . | . | . | . | .      | . |
| .            | .            | . | . | . | . | .      | . |
| Vv15g0471    | .            | . | . | . | . | .      | . |
| .            | .            | . | . | . | . | .      | . |
| Vv15g0472    | Tc01_g033300 | . | . | . | . | .      | . |
| .            | .            | . | . | . | . | .      | . |
| Vv15g0473    | Tc01_g033310 | . | . | . | . | .      | . |
| .            | .            | . | . | . | . | .      | . |
| Vv15g0474    | Tc01_g033320 | . | . | . | . | .      | . |
| .            | .            | . | . | . | . | .      | . |
| Vv15g0475    | Tc01_g033340 | . | . | . | . | .      | . |
| .            | .            | . | . | . | . | .      | . |
| Vv15g0476    | Tc01_g033370 | . | . | . | . | .      | . |
| .            | .            | . | . | . | . | .      | . |
| Vv15g0477    | .            | . | . | . | . | .      | . |
| .            | .            | . | . | . | . | .      | . |
| Vv15g0478    | Tc01_g033380 | . | . | . | . | .      | . |
| .            | .            | . | . | . | . | .      | . |
| Vv15g0479    | .            | . | . | . | . | .      | . |
| .            | .            | . | . | . | . | .      | . |
| Vv15g0480    | Tc01_g033390 | . | . | . | . | .      | . |
| .            | .            | . | . | . | . | .      | . |
| Vv15g0481    | Tc01_g033440 | . | . | . | . | .      | . |
| .            | .            | . | . | . | . | .      | . |
| Vv15g0482    | Tc01_g033450 | . | . | . | . | .      | . |
| Vv16g0531    | Tc03_g021990 | . | . | . | . | Gorai. | . |
| 007G114600.1 | .            | . | . | . | . | .      | . |
| .            | .            | . | . | . | . | .      | . |
| Vv15g0483    | Tc01_g033470 | . | . | . | . | .      | . |
| .            | .            | . | . | . | . | .      | . |

|           |              |   |   |   |   |   |   |
|-----------|--------------|---|---|---|---|---|---|
| Vv15g0484 | .            | . | . | . | . | . | . |
| .         | .            | . | . | . | . | . | . |
| Vv15g0485 | .            | . | . | . | . | . | . |
| .         | .            | . | . | . | . | . | . |
| Vv15g0486 | Tc01_g033480 | . | . | . | . | . | . |
| .         | .            | . | . | . | . | . | . |
| Vv15g0487 | .            | . | . | . | . | . | . |
| .         | .            | . | . | . | . | . | . |
| Vv15g0488 | .            | . | . | . | . | . | . |
| .         | .            | . | . | . | . | . | . |
| Vv15g0489 | .            | . | . | . | . | . | . |
| .         | .            | . | . | . | . | . | . |
| Vv15g0490 | .            | . | . | . | . | . | . |
| .         | .            | . | . | . | . | . | . |
| Vv15g0491 | Tc01_g033490 | . | . | . | . | . | . |
| .         | .            | . | . | . | . | . | . |
| Vv15g0492 | .            | . | . | . | . | . | . |
| .         | .            | . | . | . | . | . | . |
| Vv15g0493 | .            | . | . | . | . | . | . |
| .         | .            | . | . | . | . | . | . |
| Vv15g0494 | .            | . | . | . | . | . | . |
| .         | .            | . | . | . | . | . | . |
| Vv15g0495 | .            | . | . | . | . | . | . |
| .         | .            | . | . | . | . | . | . |
| Vv15g0496 | .            | . | . | . | . | . | . |
| .         | .            | . | . | . | . | . | . |
| Vv15g0497 | .            | . | . | . | . | . | . |
| .         | .            | . | . | . | . | . | . |
| Vv15g0498 | Tc01_g033520 | . | . | . | . | . | . |
| .         | .            | . | . | . | . | . | . |
| Vv15g0499 | Tc01_g033530 | . | . | . | . | . | . |
| .         | Vv02g0306    | . | . | . | . | . | . |
| Vv15g0500 | Tc01_g033540 | . | . | . | . | . | . |



|                    |              |                    |   |   |                    |   |
|--------------------|--------------|--------------------|---|---|--------------------|---|
| .                  | .            | .                  | . | . | .                  | . |
| Vv15g0501          | Tc01_g033550 | .                  | . | . | .                  | . |
| .                  | .            | .                  | . | . | .                  | . |
| Vv15g0502          | Tc01_g033560 | .                  | . | . | .                  | . |
| Gorai.004G159700.1 | .            | .                  | . | . | .                  | . |
| .                  | .            | .                  | . | . | .                  | . |
| Vv15g0503          | .            | .                  | . | . | .                  | . |
| .                  | .            | .                  | . | . | .                  | . |
| Vv15g0504          | Tc01_g033570 | .                  | . | . | .                  | . |
| .                  | .            | .                  | . | . | .                  | . |
| Vv15g0505          | .            | .                  | . | . | .                  | . |
| .                  | .            | .                  | . | . | .                  | . |
| Tc03_g021850       | .            | .                  | . | . | Vv16g0544          | . |
| .                  | .            | .                  | . | . | Gorai.008G260800.1 | . |
| Vv15g0506          | Tc01_g033580 | .                  | . | . | .                  | . |
| Vv02g0303          | .            | .                  | . | . | Gorai.             | . |
| 008G260800.1       | .            | .                  | . | . | .                  | . |
| .                  | .            | .                  | . | . | .                  | . |
| Vv15g0507          | .            | .                  | . | . | .                  | . |
| .                  | .            | .                  | . | . | .                  | . |
| Vv15g0508          | .            | .                  | . | . | .                  | . |
| .                  | .            | .                  | . | . | .                  | . |
| Vv15g0509          | .            | .                  | . | . | Vv16g0545          | . |
| .                  | .            | .                  | . | . | Gorai.008G260600.1 | . |
| Vv15g0510          | Tc01_g033590 | .                  | . | . | .                  | . |
| Vv02g0302          | .            | .                  | . | . | Gorai.             | . |
| 008G264900.1       | .            | .                  | . | . | .                  | . |
| .                  | .            | .                  | . | . | .                  | . |
| Vv15g0511          | Tc01_g033600 | .                  | . | . | .                  | . |
| .                  | .            | .                  | . | . | .                  | . |
| Vv15g0512          | Tc01_g033610 | .                  | . | . | .                  | . |
| .                  | .            | .                  | . | . | .                  | . |
| Vv15g0513          | .            | .                  | . | . | .                  | . |
| Vv02g0300          | .            | Gorai.004G128400.1 | . | . | .                  | . |
| .                  | .            | .                  | . | . | .                  | . |
| Vv15g0514          | Tc01_g033620 | .                  | . | . | .                  | . |
| .                  | .            | .                  | . | . | .                  | . |
| Vv15g0515          | Tc01_g033640 | .                  | . | . | .                  | . |
| .                  | .            | .                  | . | . | .                  | . |
| Vv16g0549          | Tc03_g021790 | .                  | . | . | Gorai.007G017200.1 | . |

|                    |                    |   |   |   |                    |   |
|--------------------|--------------------|---|---|---|--------------------|---|
| Vv15g0516          | Tc01_g033650       | . | . | . | .                  | . |
| Vv16g0550          | Tc03_g021780       | . | . | . | Gorai.007G113000.1 | . |
|                    | Gorai.008G265100.1 | . | . | . | .                  | . |
| Vv15g0517          | Tc01_g033660       | . | . | . | .                  | . |
| .                  | .                  | . | . | . | .                  | . |
| Vv15g0518          | .                  | . | . | . | .                  | . |
| .                  | .                  | . | . | . | .                  | . |
| Vv15g0519          | .                  | . | . | . | .                  | . |
| .                  | .                  | . | . | . | .                  | . |
| Vv15g0520          | .                  | . | . | . | .                  | . |
| .                  | .                  | . | . | . | .                  | . |
| Vv15g0521          | Tc01_g033670       | . | . | . | .                  | . |
| .                  | .                  | . | . | . | .                  | . |
| Vv15g0522          | .                  | . | . | . | .                  | . |
| .                  | .                  | . | . | . | .                  | . |
| Vv15g0523          | Tc01_g033680       | . | . | . | .                  | . |
| .                  | .                  | . | . | . | .                  | . |
| Vv15g0524          | .                  | . | . | . | .                  | . |
| .                  | .                  | . | . | . | .                  | . |
| Vv15g0525          | .                  | . | . | . | .                  | . |
| .                  | .                  | . | . | . | .                  | . |
| Vv15g0526          | Tc01_g033730       | . | . | . | .                  | . |
| .                  | .                  | . | . | . | .                  | . |
| Vv15g0527          | Tc01_g033750       | . | . | . | .                  | . |
|                    | Vv02g0278          | . | . | . | Gorai.004G129100.1 | . |
| Gorai.007G112600.1 | .                  | . | . | . | Gorai.006G205200.1 | . |
| .                  | .                  | . | . | . | .                  | . |
| Vv15g0528          | Tc01_g033780       | . | . | . | .                  | . |
| .                  | .                  | . | . | . | .                  | . |
| Vv15g0529          | .                  | . | . | . | .                  | . |
| .                  | .                  | . | . | . | .                  | . |
| Vv15g0530          | .                  | . | . | . | .                  | . |
| .                  | .                  | . | . | . | .                  | . |
| Vv15g0531          | Tc01_g033790       | . | . | . | .                  | . |
|                    | Vv02g0275          | . | . | . | Gorai.007G019100.1 | . |

|              |                    |   |                    |   |
|--------------|--------------------|---|--------------------|---|
|              | Gorai.008G259600.1 | . | Vv16g0567          | . |
| Tc03_g021610 | .                  | . | .                  | . |
| Vv15g0532    | Tc01_g033820       | . | .                  | . |
| .            | .                  | . | .                  | . |
| Vv15g0533    | .                  | . | .                  | . |
| .            | .                  | . | .                  | . |
| Vv15g0534    | Tc01_g033830       | . | .                  | . |
| .            | .                  | . | .                  | . |
| Vv15g0535    | Tc01_g033850       | . | .                  | . |
| .            | .                  | . | .                  | . |
| Vv15g0536    | .                  | . | .                  | . |
| .            | .                  | . | .                  | . |
| Vv15g0537    | .                  | . | .                  | . |
| .            | .                  | . | .                  | . |
| Vv15g0538    | .                  | . | .                  | . |
| .            | .                  | . | .                  | . |
| Vv15g0539    | Tc01_g033860       | . | .                  | . |
| .            | .                  | . | .                  | . |
| Vv15g0540    | Tc01_g033880       | . | .                  | . |
| .            | .                  | . | .                  | . |
| Vv15g0541    | Tc01_g033890       | . | .                  | . |
| .            | .                  | . | .                  | . |
| Vv16g0572    | Tc03_g021570       | . | Gorai.003G122900.1 | . |
| .            | .                  | . | .                  | . |
| Vv15g0542    | Tc01_g033900       | . | .                  | . |
| .            | .                  | . | .                  | . |
| Vv15g0543    | .                  | . | .                  | . |
| .            | .                  | . | .                  | . |
| Vv15g0544    | .                  | . | .                  | . |
| .            | .                  | . | .                  | . |
| Vv15g0545    | Tc01_g033910       | . | .                  | . |
| .            | .                  | . | .                  | . |
| Vv15g0546    | .                  | . | .                  | . |
| .            | .                  | . | .                  | . |
| Vv15g0547    | Tc01_g033920       | . | .                  | . |
| .            | .                  | . | .                  | . |

|                    |                    |                    |   |   |                    |   |
|--------------------|--------------------|--------------------|---|---|--------------------|---|
| Vv15g0548          | Tc01_g033940       | .                  | . | . | .                  | . |
| .                  | .                  | .                  | . | . | .                  | . |
| Vv15g0549          | Tc01_g033960       | .                  | . | . | .                  | . |
| .                  | .                  | .                  | . | . | .                  | . |
| Vv15g0550          | Tc01_g033970       | .                  | . | . | .                  | . |
| .                  | .                  | .                  | . | . | .                  | . |
| Vv15g0551          | .                  | .                  | . | . | .                  | . |
| .                  | .                  | .                  | . | . | .                  | . |
| Vv15g0552          | Tc01_g033980       | .                  | . | . | .                  | . |
| Vv02g0264          | Tc03_g029890       | .                  | . | . | Gorai.             | . |
| 007G111400.1       | Gorai.008G258900.1 | .                  | . | . | Vv16g0578          | . |
| Tc03_g021520       | .                  | Gorai.007G111400.1 | . | . | Gorai.             | . |
| 008G258900.1       | .                  | .                  | . | . | .                  | . |
| Vv15g0553          | Tc01_g034000       | .                  | . | . | .                  | . |
| .                  | .                  | .                  | . | . | .                  | . |
| Vv15g0554          | .                  | .                  | . | . | .                  | . |
| Vv16g0580          | Tc03_g021500       | .                  | . | . | Gorai.007G016700.1 | . |
| Gorai.008G266000.1 | .                  | .                  | . | . | .                  | . |
| Vv15g0555          | Tc01_g034020       | .                  | . | . | .                  | . |
| .                  | .                  | .                  | . | . | .                  | . |
| Vv15g0556          | Tc01_g034030       | .                  | . | . | .                  | . |
| .                  | .                  | .                  | . | . | .                  | . |
| Vv15g0557          | .                  | .                  | . | . | .                  | . |
| .                  | .                  | .                  | . | . | .                  | . |
| Vv15g0558          | Tc01_g034050       | .                  | . | . | .                  | . |
| .                  | .                  | .                  | . | . | .                  | . |
| Vv15g0559          | Tc01_g034060       | .                  | . | . | .                  | . |
| .                  | .                  | .                  | . | . | .                  | . |
| Vv15g0560          | Tc01_g034070       | .                  | . | . | .                  | . |
| .                  | .                  | .                  | . | . | .                  | . |
| Vv15g0561          | .                  | .                  | . | . | .                  | . |
| .                  | .                  | .                  | . | . | .                  | . |
| Vv16g0001          | .                  | .                  | . | . | .                  | . |
| .                  | .                  | .                  | . | . | .                  | . |
| Vv16g0002          | .                  | .                  | . | . | .                  | . |

|           |              |  |  |  |  |  |  |
|-----------|--------------|--|--|--|--|--|--|
| Vv16g0003 |              |  |  |  |  |  |  |
| Vv16g0004 |              |  |  |  |  |  |  |
| Vv16g0005 |              |  |  |  |  |  |  |
| Vv16g0006 |              |  |  |  |  |  |  |
| Vv16g0007 | Tc03_g024460 |  |  |  |  |  |  |
| Vv16g0008 |              |  |  |  |  |  |  |
| Vv16g0009 | Tc03_g026200 |  |  |  |  |  |  |
| Vv16g0010 |              |  |  |  |  |  |  |
| Vv16g0011 |              |  |  |  |  |  |  |
| Vv16g0012 |              |  |  |  |  |  |  |
| Vv16g0013 |              |  |  |  |  |  |  |
| Vv16g0014 |              |  |  |  |  |  |  |
| Vv16g0015 |              |  |  |  |  |  |  |
| Vv16g0016 | Tc03_g023800 |  |  |  |  |  |  |
| Vv16g0017 |              |  |  |  |  |  |  |
| Vv16g0018 |              |  |  |  |  |  |  |

|           |              |   |   |                    |   |   |   |
|-----------|--------------|---|---|--------------------|---|---|---|
| Vv16g0019 | .            | . | . | .                  | . | . | . |
| .         | .            | . | . | .                  | . | . | . |
| Vv16g0020 | .            | . | . | .                  | . | . | . |
| .         | .            | . | . | .                  | . | . | . |
| Vv16g0021 | .            | . | . | .                  | . | . | . |
| .         | .            | . | . | .                  | . | . | . |
| Vv16g0022 | .            | . | . | .                  | . | . | . |
| .         | .            | . | . | .                  | . | . | . |
| Vv16g0023 | .            | . | . | .                  | . | . | . |
| .         | .            | . | . | .                  | . | . | . |
| Vv16g0024 | .            | . | . | .                  | . | . | . |
| .         | .            | . | . | .                  | . | . | . |
| Vv16g0025 | Tc03_g023790 | . | . | .                  | . | . | . |
| .         | .            | . | . | .                  | . | . | . |
| Vv16g0026 | .            | . | . | .                  | . | . | . |
| .         | .            | . | . | .                  | . | . | . |
| Vv16g0027 | .            | . | . | .                  | . | . | . |
| .         | .            | . | . | .                  | . | . | . |
| Vv16g0028 | .            | . | . | .                  | . | . | . |
| .         | .            | . | . | .                  | . | . | . |
| Vv16g0029 | Tc03_g024420 | . | . | Gorai.007G029700.1 | . | . | . |
| .         | .            | . | . | .                  | . | . | . |
| Vv16g0030 | .            | . | . | .                  | . | . | . |
| .         | .            | . | . | .                  | . | . | . |
| Vv16g0031 | .            | . | . | .                  | . | . | . |
| .         | .            | . | . | .                  | . | . | . |
| Vv16g0032 | Tc03_g013680 | . | . | Gorai.003G107300.1 | . | . | . |
| .         | .            | . | . | .                  | . | . | . |
| Vv16g0033 | .            | . | . | .                  | . | . | . |
| .         | .            | . | . | .                  | . | . | . |
| Vv16g0034 | .            | . | . | .                  | . | . | . |
| .         | .            | . | . | .                  | . | . | . |
| Vv16g0035 | .            | . | . | .                  | . | . | . |
| .         | .            | . | . | .                  | . | . | . |

|              |                    |   |   |                    |        |   |   |
|--------------|--------------------|---|---|--------------------|--------|---|---|
| Vv16g0036    | .                  | . | . | .                  | .      | . | . |
| .            | .                  | . | . | .                  | .      | . | . |
| Vv16g0037    | .                  | . | . | .                  | .      | . | . |
| .            | .                  | . | . | .                  | .      | . | . |
| Vv16g0038    | .                  | . | . | .                  | .      | . | . |
| .            | .                  | . | . | .                  | .      | . | . |
| Vv16g0039    | .                  | . | . | .                  | .      | . | . |
| .            | .                  | . | . | .                  | .      | . | . |
| Vv16g0040    | .                  | . | . | .                  | .      | . | . |
| .            | .                  | . | . | .                  | .      | . | . |
| Vv16g0041    | Tc03_g013700       | . | . | Gorai.003G107400.1 | .      | . | . |
|              | Gorai.008G202400.1 | . | . | .                  | .      | . | . |
| .            | .                  | . | . | .                  | .      | . | . |
| Vv16g0042    | .                  | . | . | .                  | .      | . | . |
| .            | .                  | . | . | .                  | .      | . | . |
| Vv16g0043    | .                  | . | . | .                  | .      | . | . |
| .            | .                  | . | . | .                  | .      | . | . |
| Vv16g0044    | Tc03_g013710       | . | . | .                  | Gorai. | . | . |
| 008G202500.1 | .                  | . | . | .                  | .      | . | . |
| .            | .                  | . | . | .                  | .      | . | . |
| Vv16g0045    | Tc03_g025810       | . | . | .                  | .      | . | . |
| .            | .                  | . | . | .                  | .      | . | . |
| Vv16g0046    | .                  | . | . | .                  | .      | . | . |
| .            | .                  | . | . | .                  | .      | . | . |
| Vv16g0047    | .                  | . | . | .                  | .      | . | . |
| .            | .                  | . | . | .                  | .      | . | . |
| Vv16g0048    | Tc03_g013740       | . | . | .                  | .      | . | . |
| .            | .                  | . | . | .                  | .      | . | . |
| Vv16g0049    | .                  | . | . | .                  | .      | . | . |
| .            | .                  | . | . | .                  | .      | . | . |
| Vv16g0050    | .                  | . | . | .                  | .      | . | . |
| .            | .                  | . | . | .                  | .      | . | . |
| Vv16g0051    | Tc03_g025790       | . | . | .                  | .      | . | . |
| .            | .                  | . | . | .                  | .      | . | . |
| .            | .                  | . | . | .                  | .      | . | . |

|           |              |   |   |   |   |   |   |
|-----------|--------------|---|---|---|---|---|---|
| Vv16g0052 | .            | . | . | . | . | . | . |
| .         | .            | . | . | . | . | . | . |
| Vv16g0053 | .            | . | . | . | . | . | . |
| .         | .            | . | . | . | . | . | . |
| Vv16g0054 | Tc03_g025780 | . | . | . | . | . | . |
| .         | .            | . | . | . | . | . | . |
| Vv16g0055 | .            | . | . | . | . | . | . |
| .         | .            | . | . | . | . | . | . |
| Vv16g0056 | .            | . | . | . | . | . | . |
| .         | .            | . | . | . | . | . | . |
| Vv16g0057 | .            | . | . | . | . | . | . |
| .         | .            | . | . | . | . | . | . |
| Vv16g0058 | Tc03_g025770 | . | . | . | . | . | . |
| .         | .            | . | . | . | . | . | . |
| Vv16g0059 | .            | . | . | . | . | . | . |
| .         | .            | . | . | . | . | . | . |
| Vv16g0060 | .            | . | . | . | . | . | . |
| .         | .            | . | . | . | . | . | . |
| Vv16g0061 | Tc03_g025760 | . | . | . | . | . | . |
| .         | .            | . | . | . | . | . | . |
| Vv16g0062 | .            | . | . | . | . | . | . |
| .         | .            | . | . | . | . | . | . |
| Vv16g0063 | Tc03_g025740 | . | . | . | . | . | . |
| .         | .            | . | . | . | . | . | . |
| Vv16g0064 | .            | . | . | . | . | . | . |
| .         | .            | . | . | . | . | . | . |
| Vv16g0065 | .            | . | . | . | . | . | . |
| .         | .            | . | . | . | . | . | . |
| Vv16g0066 | .            | . | . | . | . | . | . |
| .         | .            | . | . | . | . | . | . |
| Vv16g0067 | .            | . | . | . | . | . | . |
| .         | .            | . | . | . | . | . | . |
| Vv16g0068 | .            | . | . | . | . | . | . |
| .         | .            | . | . | . | . | . | . |



|              |              |   |   |                    |        |   |   |
|--------------|--------------|---|---|--------------------|--------|---|---|
| Vv16g0069    | .            | . | . | .                  | .      | . | . |
| .            | .            | . | . | .                  | .      | . | . |
| Vv16g0070    | .            | . | . | .                  | .      | . | . |
| .            | .            | . | . | .                  | .      | . | . |
| Vv16g0071    | Tc03_g030330 | . | . | .                  | Gorai. | . | . |
| 008G222500.1 | .            | . | . | .                  | .      | . | . |
| .            | .            | . | . | .                  | .      | . | . |
| Vv16g0072    | .            | . | . | .                  | .      | . | . |
| .            | .            | . | . | .                  | .      | . | . |
| Vv16g0073    | .            | . | . | .                  | .      | . | . |
| .            | .            | . | . | .                  | .      | . | . |
| Vv16g0074    | .            | . | . | .                  | .      | . | . |
| .            | .            | . | . | .                  | .      | . | . |
| Vv16g0075    | Tc03_g022880 | . | . | Gorai.003G077000.1 | .      | . | . |
| .            | .            | . | . | .                  | .      | . | . |
| Vv16g0076    | .            | . | . | .                  | .      | . | . |
| .            | .            | . | . | .                  | .      | . | . |
| Vv16g0077    | .            | . | . | .                  | .      | . | . |
| .            | .            | . | . | .                  | .      | . | . |
| Vv16g0078    | .            | . | . | .                  | .      | . | . |
| .            | .            | . | . | .                  | .      | . | . |
| Vv16g0079    | .            | . | . | .                  | .      | . | . |
| .            | .            | . | . | .                  | .      | . | . |
| Vv16g0080    | .            | . | . | .                  | .      | . | . |
| .            | .            | . | . | .                  | .      | . | . |
| Vv16g0081    | .            | . | . | .                  | .      | . | . |
| .            | .            | . | . | .                  | .      | . | . |
| Vv16g0082    | .            | . | . | .                  | .      | . | . |
| .            | .            | . | . | .                  | .      | . | . |
| Vv16g0083    | .            | . | . | .                  | .      | . | . |
| .            | .            | . | . | .                  | .      | . | . |
| Vv16g0084    | .            | . | . | .                  | .      | . | . |
| .            | .            | . | . | .                  | .      | . | . |
| Vv16g0085    | .            | . | . | .                  | .      | . | . |

|           |              |   |   |   |   |   |   |
|-----------|--------------|---|---|---|---|---|---|
| .         | .            | . | . | . | . | . | . |
| .         | .            | . | . | . | . | . | . |
| Vv16g0086 | .            | . | . | . | . | . | . |
| .         | .            | . | . | . | . | . | . |
| Vv16g0087 | Tc03_g003090 | . | . | . | . | . | . |
| .         | .            | . | . | . | . | . | . |
| Vv16g0088 | .            | . | . | . | . | . | . |
| .         | .            | . | . | . | . | . | . |
| Vv16g0089 | .            | . | . | . | . | . | . |
| .         | .            | . | . | . | . | . | . |
| Vv16g0090 | .            | . | . | . | . | . | . |
| .         | .            | . | . | . | . | . | . |
| Vv16g0091 | .            | . | . | . | . | . | . |
| .         | .            | . | . | . | . | . | . |
| Vv16g0092 | .            | . | . | . | . | . | . |
| .         | .            | . | . | . | . | . | . |
| Vv16g0093 | .            | . | . | . | . | . | . |
| .         | .            | . | . | . | . | . | . |
| Vv16g0094 | .            | . | . | . | . | . | . |
| .         | .            | . | . | . | . | . | . |
| Vv16g0095 | Tc03_g030740 | . | . | . | . | . | . |
| .         | .            | . | . | . | . | . | . |
| Vv16g0096 | .            | . | . | . | . | . | . |
| .         | .            | . | . | . | . | . | . |
| Vv16g0097 | .            | . | . | . | . | . | . |
| .         | .            | . | . | . | . | . | . |
| Vv16g0098 | .            | . | . | . | . | . | . |
| .         | .            | . | . | . | . | . | . |
| Vv16g0099 | .            | . | . | . | . | . | . |
| .         | .            | . | . | . | . | . | . |
| Vv16g0100 | .            | . | . | . | . | . | . |
| .         | .            | . | . | . | . | . | . |
| Vv16g0101 | .            | . | . | . | . | . | . |
| .         | .            | . | . | . | . | . | . |
| .         | .            | . | . | . | . | . | . |

|           |              |   |   |   |   |   |   |
|-----------|--------------|---|---|---|---|---|---|
| Vv16g0102 | .            | . | . | . | . | . | . |
| .         | .            | . | . | . | . | . | . |
| Vv16g0103 | Tc03_g030750 | . | . | . | . | . | . |
| .         | .            | . | . | . | . | . | . |
| Vv16g0104 | .            | . | . | . | . | . | . |
| .         | .            | . | . | . | . | . | . |
| Vv16g0105 | .            | . | . | . | . | . | . |
| .         | .            | . | . | . | . | . | . |
| Vv16g0106 | .            | . | . | . | . | . | . |
| .         | .            | . | . | . | . | . | . |
| Vv16g0107 | .            | . | . | . | . | . | . |
| .         | .            | . | . | . | . | . | . |
| Vv16g0108 | .            | . | . | . | . | . | . |
| .         | .            | . | . | . | . | . | . |
| Vv16g0109 | Tc03_g003550 | . | . | . | . | . | . |
| .         | .            | . | . | . | . | . | . |
| Vv16g0110 | .            | . | . | . | . | . | . |
| .         | .            | . | . | . | . | . | . |
| Vv16g0111 | .            | . | . | . | . | . | . |
| .         | .            | . | . | . | . | . | . |
| Vv16g0112 | .            | . | . | . | . | . | . |
| .         | .            | . | . | . | . | . | . |
| Vv16g0113 | .            | . | . | . | . | . | . |
| .         | .            | . | . | . | . | . | . |
| Vv16g0114 | Tc03_g022750 | . | . | . | . | . | . |
| .         | .            | . | . | . | . | . | . |
| Vv16g0115 | .            | . | . | . | . | . | . |
| .         | .            | . | . | . | . | . | . |
| Vv16g0116 | .            | . | . | . | . | . | . |
| .         | .            | . | . | . | . | . | . |
| Vv16g0117 | .            | . | . | . | . | . | . |
| .         | .            | . | . | . | . | . | . |
| Vv16g0118 | .            | . | . | . | . | . | . |
| .         | .            | . | . | . | . | . | . |

|                    |                    |   |   |   |   |                    |
|--------------------|--------------------|---|---|---|---|--------------------|
| Vv16g0119          | .                  | . | . | . | . | Gorai.008G226700.1 |
| .                  | .                  | . | . | . | . | .                  |
| .                  | .                  | . | . | . | . | .                  |
| Vv16g0120          | .                  | . | . | . | . | .                  |
| .                  | .                  | . | . | . | . | .                  |
| .                  | .                  | . | . | . | . | .                  |
| Vv16g0121          | .                  | . | . | . | . | .                  |
| .                  | .                  | . | . | . | . | .                  |
| .                  | .                  | . | . | . | . | .                  |
| Vv16g0122          | .                  | . | . | . | . | .                  |
| .                  | .                  | . | . | . | . | .                  |
| .                  | .                  | . | . | . | . | .                  |
| Vv16g0123          | .                  | . | . | . | . | .                  |
| .                  | .                  | . | . | . | . | .                  |
| .                  | .                  | . | . | . | . | .                  |
| Vv16g0124          | .                  | . | . | . | . | .                  |
| .                  | .                  | . | . | . | . | .                  |
| .                  | .                  | . | . | . | . | .                  |
| Vv16g0125          | .                  | . | . | . | . | .                  |
| .                  | .                  | . | . | . | . | .                  |
| .                  | .                  | . | . | . | . | .                  |
| Vv16g0126          | .                  | . | . | . | . | .                  |
| .                  | .                  | . | . | . | . | .                  |
| .                  | .                  | . | . | . | . | .                  |
| Vv16g0127          | .                  | . | . | . | . | Gorai.007G032400.1 |
| Gorai.008G226100.1 | .                  | . | . | . | . | Gorai.             |
| 004G163500.1       | Gorai.003G183000.1 | . | . | . | . | Gorai.007G032400.1 |
| Gorai.008G226100.1 | Gorai.006G217100.1 | . | . | . | . | .                  |
| .                  | .                  | . | . | . | . | .                  |
| Vv16g0128          | .                  | . | . | . | . | .                  |
| .                  | .                  | . | . | . | . | .                  |
| .                  | .                  | . | . | . | . | .                  |
| Vv16g0129          | .                  | . | . | . | . | .                  |
| .                  | .                  | . | . | . | . | .                  |
| .                  | .                  | . | . | . | . | .                  |
| Vv16g0130          | .                  | . | . | . | . | Gorai.007G032800.1 |
| Gorai.008G225600.1 | .                  | . | . | . | . | .                  |
| Gorai.007G032800.1 | .                  | . | . | . | . | .                  |
| .                  | .                  | . | . | . | . | .                  |
| Vv16g0131          | .                  | . | . | . | . | .                  |
| .                  | .                  | . | . | . | . | .                  |
| .                  | .                  | . | . | . | . | .                  |
| Vv16g0132          | .                  | . | . | . | . | .                  |
| .                  | .                  | . | . | . | . | .                  |
| .                  | .                  | . | . | . | . | .                  |
| Vv16g0133          | .                  | . | . | . | . | .                  |
| .                  | .                  | . | . | . | . | .                  |
| .                  | .                  | . | . | . | . | .                  |

|                    |              |                    |                    |                    |   |   |   |
|--------------------|--------------|--------------------|--------------------|--------------------|---|---|---|
| Vv16g0134          | .            | .                  | .                  | .                  | . | . | . |
| .                  | .            | .                  | .                  | .                  | . | . | . |
| Vv16g0135          | .            | .                  | .                  | .                  | . | . | . |
| .                  | .            | .                  | .                  | .                  | . | . | . |
| Vv16g0136          | .            | .                  | .                  | .                  | . | . | . |
| .                  | .            | .                  | .                  | .                  | . | . | . |
| Vv16g0137          | .            | .                  | .                  | .                  | . | . | . |
| .                  | .            | .                  | .                  | .                  | . | . | . |
| Vv16g0138          | .            | .                  | .                  | .                  | . | . | . |
| .                  | .            | .                  | .                  | .                  | . | . | . |
| Vv16g0139          | .            | .                  | .                  | .                  | . | . | . |
| .                  | .            | .                  | .                  | .                  | . | . | . |
| Vv16g0140          | .            | .                  | .                  | .                  | . | . | . |
| .                  | .            | .                  | .                  | .                  | . | . | . |
| Vv16g0141          | .            | .                  | .                  | .                  | . | . | . |
| Vv02g0778          | .            | Gorai.004G184100.1 | .                  | .                  | . | . | . |
| .                  | .            | .                  | .                  | .                  | . | . | . |
| Vv16g0142          | .            | .                  | .                  | .                  | . | . | . |
| .                  | .            | .                  | .                  | .                  | . | . | . |
| Vv16g0143          | .            | .                  | .                  | .                  | . | . | . |
| .                  | .            | .                  | .                  | .                  | . | . | . |
| Vv16g0144          | .            | .                  | .                  | .                  | . | . | . |
| .                  | .            | .                  | .                  | .                  | . | . | . |
| Vv16g0145          | .            | .                  | .                  | Gorai.007G033100.1 | . | . | . |
| .                  | Vv02g0785    | .                  | Tc03_g029660       | .                  | . | . | . |
| Gorai.007G033100.1 | .            | .                  | Gorai.006G217500.1 | .                  | . | . | . |
| .                  | .            | .                  | .                  | .                  | . | . | . |
| Vv16g0146          | Tc03_g029670 | .                  | .                  | .                  | . | . | . |
| .                  | .            | .                  | .                  | .                  | . | . | . |
| Vv16g0147          | .            | .                  | .                  | .                  | . | . | . |
| .                  | .            | .                  | .                  | .                  | . | . | . |
| Vv16g0148          | Tc03_g029680 | .                  | .                  | .                  | . | . | . |
| .                  | .            | .                  | .                  | .                  | . | . | . |
| Vv16g0149          | Tc03_g029690 | .                  | .                  | .                  | . | . | . |
| .                  | .            | .                  | .                  | .                  | . | . | . |
| Vv16g0150          | .            | .                  | .                  | .                  | . | . | . |

|                    |                    |                    |                    |                    |        |  |
|--------------------|--------------------|--------------------|--------------------|--------------------|--------|--|
| Vv16g0151          |                    |                    |                    |                    |        |  |
| Vv16g0152          | Tc03_g018360       |                    |                    | Gorai.006G064000.1 |        |  |
| Vv16g0153          |                    |                    |                    |                    |        |  |
| Vv16g0154          |                    |                    |                    |                    |        |  |
| Vv16g0155          |                    |                    |                    |                    |        |  |
| Vv16g0156          |                    |                    |                    |                    |        |  |
| Vv16g0157          |                    |                    |                    |                    |        |  |
| Vv16g0158          |                    |                    |                    |                    |        |  |
| Vv16g0159          |                    |                    |                    |                    |        |  |
| Vv16g0160          |                    |                    |                    |                    |        |  |
| Vv16g0161          | Tc03_g029760       |                    |                    |                    | Gorai. |  |
| 008G225200.1       |                    |                    |                    |                    |        |  |
| Vv16g0162          |                    |                    |                    | Gorai.007G033300.1 |        |  |
| 003G183900.1       | Vv02g0806          | Tc03_g029760       |                    | Gorai.             |        |  |
|                    | Gorai.007G033300.1 | Gorai.008G225200.1 |                    |                    |        |  |
| Vv16g0163          | Tc03_g029800       |                    |                    |                    | Gorai. |  |
| 008G224800.1       | Vv02g0810          | Tc03_g029800       |                    | Gorai.             |        |  |
| 004G183100.1       | Gorai.003G184100.1 |                    | Gorai.008G224800.1 |                    |        |  |
|                    | Gorai.006G217600.1 |                    |                    |                    |        |  |
| Vv16g0164          | Tc03_g029810       |                    |                    |                    | Gorai. |  |
| 008G224700.1       | Vv02g0812          | Tc03_g029810       |                    |                    |        |  |
| Gorai.003G184200.1 |                    | Gorai.008G224700.1 |                    |                    |        |  |
| Vv16g0165          |                    |                    |                    |                    |        |  |

|                    |              |              |   |   |                    |
|--------------------|--------------|--------------|---|---|--------------------|
| Vv16g0166          | Tc03_g029870 | .            | . | . | Gorai.             |
| 008G224600.1       | .            | .            | . | . | .                  |
| Vv16g0167          | Tc03_g029910 | .            | . | . | Gorai.             |
| 008G224500.1       | .            | .            | . | . | .                  |
| Vv16g0168          | .            | .            | . | . | Gorai.008G224400.1 |
|                    | Vv02g0824    | Tc03_g030440 | . | . | .                  |
| Gorai.008G224400.1 | .            | .            | . | . | .                  |
| Vv16g0169          | Tc03_g029920 | .            | . | . | .                  |
| .                  | .            | .            | . | . | .                  |
| Vv16g0170          | .            | .            | . | . | .                  |
| .                  | .            | .            | . | . | .                  |
| Vv16g0171          | .            | .            | . | . | .                  |
| .                  | .            | .            | . | . | .                  |
| Vv16g0172          | .            | .            | . | . | .                  |
| .                  | .            | .            | . | . | .                  |
| Vv16g0173          | .            | .            | . | . | .                  |
| .                  | .            | .            | . | . | .                  |
| Vv16g0174          | .            | .            | . | . | .                  |
| .                  | .            | .            | . | . | .                  |
| Vv16g0175          | .            | .            | . | . | .                  |
| .                  | .            | .            | . | . | .                  |
| Vv16g0176          | .            | .            | . | . | .                  |
| .                  | .            | .            | . | . | .                  |
| Vv16g0177          | .            | .            | . | . | .                  |
| .                  | .            | .            | . | . | .                  |
| Vv16g0178          | .            | .            | . | . | .                  |
| .                  | .            | .            | . | . | .                  |
| Vv16g0179          | .            | .            | . | . | .                  |
| .                  | .            | .            | . | . | .                  |
| Vv16g0180          | .            | .            | . | . | .                  |
| .                  | .            | .            | . | . | .                  |
| Vv16g0181          | .            | .            | . | . | .                  |
| .                  | .            | .            | . | . | .                  |
| .                  | .            | .            | . | . | .                  |

|              |              |                    |   |   |   |                    |   |
|--------------|--------------|--------------------|---|---|---|--------------------|---|
| Vv16g0182    | .            | .                  | . | . | . | .                  | . |
| .            | .            | .                  | . | . | . | .                  | . |
| Vv16g0183    | Tc03_g030010 | .                  | . | . | . | Gorai.             | . |
| 008G223700.1 | .            | .                  | . | . | . | .                  | . |
| Vv16g0184    | .            | .                  | . | . | . | .                  | . |
| .            | .            | .                  | . | . | . | .                  | . |
| Vv16g0185    | .            | .                  | . | . | . | .                  | . |
| .            | .            | .                  | . | . | . | .                  | . |
| Vv16g0186    | Tc03_g030140 | .                  | . | . | . | Gorai.007G033600.1 | . |
| .            | .            | .                  | . | . | . | .                  | . |
| Vv16g0187    | .            | .                  | . | . | . | .                  | . |
| .            | .            | .                  | . | . | . | .                  | . |
| Vv16g0188    | .            | .                  | . | . | . | .                  | . |
| .            | .            | .                  | . | . | . | .                  | . |
| Vv16g0189    | .            | .                  | . | . | . | .                  | . |
| .            | .            | .                  | . | . | . | .                  | . |
| Vv16g0190    | .            | .                  | . | . | . | .                  | . |
| .            | .            | .                  | . | . | . | .                  | . |
| Vv16g0191    | Tc03_g018230 | .                  | . | . | . | .                  | . |
| .            | .            | .                  | . | . | . | .                  | . |
| Vv16g0192    | Tc03_g030350 | .                  | . | . | . | Gorai.             | . |
| 008G219800.1 | .            | .                  | . | . | . | .                  | . |
| Vv16g0193    | .            | .                  | . | . | . | .                  | . |
| .            | .            | .                  | . | . | . | .                  | . |
| Vv16g0194    | .            | .                  | . | . | . | .                  | . |
| .            | .            | .                  | . | . | . | .                  | . |
| Vv16g0195    | .            | .                  | . | . | . | .                  | . |
| .            | .            | .                  | . | . | . | .                  | . |
| Vv16g0196    | .            | .                  | . | . | . | .                  | . |
| .            | .            | .                  | . | . | . | .                  | . |
| Vv16g0197    | .            | .                  | . | . | . | .                  | . |
| .            | .            | .                  | . | . | . | .                  | . |
| Vv16g0198    | Tc03_g018140 | Gorai.001G048500.1 | . | . | . | .                  | . |
| .            | .            | .                  | . | . | . | .                  | . |



|           |              |  |  |  |  |  |  |
|-----------|--------------|--|--|--|--|--|--|
| Vv16g0199 |              |  |  |  |  |  |  |
| Vv16g0200 |              |  |  |  |  |  |  |
| Vv16g0201 | Tc03_g018020 |  |  |  |  |  |  |
| Vv16g0202 |              |  |  |  |  |  |  |
| Vv16g0203 |              |  |  |  |  |  |  |
| Vv16g0204 |              |  |  |  |  |  |  |
| Vv16g0205 |              |  |  |  |  |  |  |
| Vv16g0206 |              |  |  |  |  |  |  |
| Vv16g0207 |              |  |  |  |  |  |  |
| Vv16g0208 |              |  |  |  |  |  |  |
| Vv16g0209 |              |  |  |  |  |  |  |
| Vv16g0210 |              |  |  |  |  |  |  |
| Vv16g0211 |              |  |  |  |  |  |  |
| Vv16g0212 |              |  |  |  |  |  |  |
| Vv16g0213 |              |  |  |  |  |  |  |
| Vv16g0214 |              |  |  |  |  |  |  |
| Vv16g0215 |              |  |  |  |  |  |  |

|           |              |  |                    |  |  |  |
|-----------|--------------|--|--------------------|--|--|--|
| Vv16g0216 |              |  |                    |  |  |  |
| Vv16g0217 |              |  |                    |  |  |  |
| Vv16g0218 |              |  |                    |  |  |  |
| Vv16g0219 |              |  |                    |  |  |  |
| Vv16g0220 |              |  |                    |  |  |  |
| Vv16g0221 |              |  |                    |  |  |  |
| Vv16g0222 |              |  |                    |  |  |  |
| Vv16g0223 | Tc03_g030420 |  | Gorai.001G052000.1 |  |  |  |
| Vv16g0224 |              |  |                    |  |  |  |
| Vv16g0225 |              |  |                    |  |  |  |
| Vv16g0226 |              |  |                    |  |  |  |
| Vv16g0227 |              |  |                    |  |  |  |
| Vv16g0228 |              |  |                    |  |  |  |
| Vv16g0229 |              |  |                    |  |  |  |
| Vv16g0230 |              |  |                    |  |  |  |
| Vv16g0231 |              |  |                    |  |  |  |

|              |              |                    |   |   |        |   |   |
|--------------|--------------|--------------------|---|---|--------|---|---|
| Vv16g0232    | .            | .                  | . | . | .      | . | . |
| .            | .            | .                  | . | . | .      | . | . |
| Vv16g0233    | .            | .                  | . | . | .      | . | . |
| .            | .            | .                  | . | . | .      | . | . |
| Vv16g0234    | .            | .                  | . | . | .      | . | . |
| .            | .            | .                  | . | . | .      | . | . |
| Vv16g0235    | .            | .                  | . | . | .      | . | . |
| .            | .            | .                  | . | . | .      | . | . |
| Vv16g0236    | .            | .                  | . | . | .      | . | . |
| .            | .            | .                  | . | . | .      | . | . |
| Vv16g0237    | .            | .                  | . | . | .      | . | . |
| .            | .            | .                  | . | . | .      | . | . |
| Vv16g0238    | .            | .                  | . | . | .      | . | . |
| .            | .            | .                  | . | . | .      | . | . |
| Vv16g0239    | .            | .                  | . | . | .      | . | . |
| .            | .            | .                  | . | . | .      | . | . |
| Vv16g0240    | .            | .                  | . | . | .      | . | . |
| .            | .            | .                  | . | . | .      | . | . |
| Vv16g0241    | .            | .                  | . | . | .      | . | . |
| .            | .            | .                  | . | . | .      | . | . |
| Vv16g0242    | .            | .                  | . | . | .      | . | . |
| .            | .            | .                  | . | . | .      | . | . |
| Vv16g0243    | .            | .                  | . | . | .      | . | . |
| .            | .            | .                  | . | . | .      | . | . |
| Vv16g0244    | .            | .                  | . | . | .      | . | . |
| .            | .            | .                  | . | . | .      | . | . |
| Vv16g0245    | .            | Gorai.001G052100.1 | . | . | .      | . | . |
| .            | .            | .                  | . | . | .      | . | . |
| Vv16g0246    | Tc03_g024210 | .                  | . | . | Gorai. | . | . |
| 008G231200.1 | .            | .                  | . | . | .      | . | . |
| .            | .            | .                  | . | . | .      | . | . |
| Vv16g0247    | .            | Gorai.001G052200.1 | . | . | .      | . | . |
| .            | .            | .                  | . | . | .      | . | . |
| .            | .            | .                  | . | . | .      | . | . |
| Vv16g0248    | .            | .                  | . | . | .      | . | . |
| .            | .            | .                  | . | . | .      | . | . |

|                    |                    |                    |                    |   |
|--------------------|--------------------|--------------------|--------------------|---|
| Vv16g0249          | Tc03_g024200       | Gorai.001G052300.1 | .                  | . |
|                    | Gorai.008G231100.1 | .                  | .                  | . |
| .                  | .                  | .                  | .                  | . |
| Vv16g0250          | .                  | .                  | .                  | . |
| .                  | .                  | .                  | .                  | . |
| Vv16g0251          | Tc03_g024190       | .                  | .                  | . |
| .                  | .                  | .                  | .                  | . |
| Vv16g0252          | .                  | .                  | .                  | . |
| .                  | .                  | .                  | .                  | . |
| Vv16g0253          | .                  | .                  | .                  | . |
| .                  | .                  | .                  | .                  | . |
| Vv16g0254          | .                  | .                  | .                  | . |
| .                  | .                  | .                  | .                  | . |
| Vv16g0255          | .                  | .                  | Gorai.008G231000.1 | . |
| .                  | .                  | .                  | .                  | . |
| Vv16g0256          | .                  | .                  | .                  | . |
| .                  | .                  | .                  | .                  | . |
| Vv16g0257          | .                  | .                  | .                  | . |
| .                  | .                  | .                  | .                  | . |
| Vv16g0258          | .                  | .                  | Gorai.008G213200.1 | . |
| .                  | .                  | .                  | .                  | . |
| Vv16g0259          | .                  | .                  | .                  | . |
| .                  | .                  | .                  | .                  | . |
| Vv16g0260          | .                  | Gorai.001G052500.1 | .                  | . |
| Gorai.008G213100.1 | .                  | .                  | .                  | . |
| .                  | .                  | .                  | .                  | . |
| Vv16g0261          | .                  | .                  | .                  | . |
| .                  | .                  | .                  | .                  | . |
| Vv16g0262          | .                  | .                  | .                  | . |
| .                  | .                  | .                  | .                  | . |
| Vv16g0263          | .                  | .                  | .                  | . |
| .                  | .                  | .                  | .                  | . |
| Vv16g0264          | .                  | .                  | .                  | . |
| .                  | .                  | .                  | .                  | . |

|           |              |   |   |   |                    |   |   |
|-----------|--------------|---|---|---|--------------------|---|---|
| Vv16g0265 | .            | . | . | . | .                  | . | . |
| .         | .            | . | . | . | .                  | . | . |
| Vv16g0266 | .            | . | . | . | .                  | . | . |
| .         | .            | . | . | . | .                  | . | . |
| Vv16g0267 | .            | . | . | . | .                  | . | . |
| .         | .            | . | . | . | .                  | . | . |
| Vv16g0268 | .            | . | . | . | .                  | . | . |
| .         | .            | . | . | . | .                  | . | . |
| Vv16g0269 | .            | . | . | . | .                  | . | . |
| .         | .            | . | . | . | .                  | . | . |
| Vv16g0270 | .            | . | . | . | .                  | . | . |
| .         | .            | . | . | . | .                  | . | . |
| Vv16g0271 | .            | . | . | . | Gorai.008G230500.1 | . | . |
| .         | .            | . | . | . | .                  | . | . |
| Vv16g0272 | .            | . | . | . | .                  | . | . |
| .         | .            | . | . | . | .                  | . | . |
| Vv16g0273 | .            | . | . | . | .                  | . | . |
| .         | .            | . | . | . | .                  | . | . |
| Vv16g0274 | .            | . | . | . | .                  | . | . |
| .         | .            | . | . | . | .                  | . | . |
| Vv16g0275 | Tc03_g016120 | . | . | . | .                  | . | . |
| .         | .            | . | . | . | .                  | . | . |
| Vv16g0276 | .            | . | . | . | .                  | . | . |
| .         | .            | . | . | . | .                  | . | . |
| Vv16g0277 | .            | . | . | . | .                  | . | . |
| .         | .            | . | . | . | .                  | . | . |
| Vv16g0278 | .            | . | . | . | .                  | . | . |
| .         | .            | . | . | . | .                  | . | . |
| Vv16g0279 | .            | . | . | . | .                  | . | . |
| .         | .            | . | . | . | .                  | . | . |
| Vv16g0280 | .            | . | . | . | .                  | . | . |
| .         | .            | . | . | . | .                  | . | . |
| Vv16g0281 | .            | . | . | . | .                  | . | . |

|           |   |   |   |   |   |   |   |
|-----------|---|---|---|---|---|---|---|
| .         | . | . | . | . | . | . | . |
| Vv16g0282 | . | . | . | . | . | . | . |
| .         | . | . | . | . | . | . | . |
| Vv16g0283 | . | . | . | . | . | . | . |
| .         | . | . | . | . | . | . | . |
| Vv16g0284 | . | . | . | . | . | . | . |
| .         | . | . | . | . | . | . | . |
| Vv16g0285 | . | . | . | . | . | . | . |
| .         | . | . | . | . | . | . | . |
| Vv16g0286 | . | . | . | . | . | . | . |
| .         | . | . | . | . | . | . | . |
| Vv16g0287 | . | . | . | . | . | . | . |
| .         | . | . | . | . | . | . | . |
| Vv16g0288 | . | . | . | . | . | . | . |
| .         | . | . | . | . | . | . | . |
| Vv16g0289 | . | . | . | . | . | . | . |
| .         | . | . | . | . | . | . | . |
| Vv16g0290 | . | . | . | . | . | . | . |
| .         | . | . | . | . | . | . | . |
| Vv16g0291 | . | . | . | . | . | . | . |
| .         | . | . | . | . | . | . | . |
| Vv16g0292 | . | . | . | . | . | . | . |
| .         | . | . | . | . | . | . | . |
| Vv16g0293 | . | . | . | . | . | . | . |
| .         | . | . | . | . | . | . | . |
| Vv16g0294 | . | . | . | . | . | . | . |
| .         | . | . | . | . | . | . | . |
| Vv16g0295 | . | . | . | . | . | . | . |
| .         | . | . | . | . | . | . | . |
| Vv16g0296 | . | . | . | . | . | . | . |
| .         | . | . | . | . | . | . | . |
| Vv16g0297 | . | . | . | . | . | . | . |
| .         | . | . | . | . | . | . | . |
| .         | . | . | . | . | . | . | . |

|              |              |   |   |   |   |        |   |
|--------------|--------------|---|---|---|---|--------|---|
| Vv16g0298    | .            | . | . | . | . | .      | . |
| .            | .            | . | . | . | . | .      | . |
| Vv16g0299    | .            | . | . | . | . | .      | . |
| .            | .            | . | . | . | . | .      | . |
| Vv16g0300    | Tc03_g018250 | . | . | . | . | .      | . |
| .            | .            | . | . | . | . | .      | . |
| Vv16g0301    | .            | . | . | . | . | .      | . |
| .            | .            | . | . | . | . | .      | . |
| Vv16g0302    | .            | . | . | . | . | .      | . |
| .            | .            | . | . | . | . | .      | . |
| Vv16g0303    | .            | . | . | . | . | .      | . |
| .            | .            | . | . | . | . | .      | . |
| Vv16g0304    | .            | . | . | . | . | .      | . |
| .            | .            | . | . | . | . | .      | . |
| Vv16g0305    | .            | . | . | . | . | .      | . |
| .            | .            | . | . | . | . | .      | . |
| Vv16g0306    | Tc03_g018240 | . | . | . | . | .      | . |
| .            | .            | . | . | . | . | .      | . |
| Vv16g0307    | .            | . | . | . | . | .      | . |
| .            | .            | . | . | . | . | .      | . |
| Vv16g0308    | .            | . | . | . | . | .      | . |
| .            | .            | . | . | . | . | .      | . |
| Vv16g0309    | .            | . | . | . | . | .      | . |
| .            | .            | . | . | . | . | .      | . |
| Vv16g0310    | Tc03_g016210 | . | . | . | . | .      | . |
| 008G212300.1 | .            | . | . | . | . | Gorai. | . |
| .            | .            | . | . | . | . | .      | . |
| Vv16g0311    | .            | . | . | . | . | .      | . |
| .            | .            | . | . | . | . | .      | . |
| Vv16g0312    | Tc03_g016220 | . | . | . | . | .      | . |
| .            | .            | . | . | . | . | .      | . |
| Vv16g0313    | .            | . | . | . | . | .      | . |
| .            | .            | . | . | . | . | .      | . |
| Vv16g0314    | .            | . | . | . | . | .      | . |
| .            | .            | . | . | . | . | .      | . |

|              |              |   |                    |   |        |   |
|--------------|--------------|---|--------------------|---|--------|---|
| Vv16g0315    | .            | . | Gorai.001G052600.1 | . | .      | . |
| .            | .            | . | .                  | . | .      | . |
| Vv16g0316    | .            | . | .                  | . | .      | . |
| .            | .            | . | .                  | . | .      | . |
| Vv16g0317    | .            | . | .                  | . | .      | . |
| .            | .            | . | .                  | . | .      | . |
| Vv16g0318    | .            | . | .                  | . | .      | . |
| .            | .            | . | .                  | . | .      | . |
| Vv16g0319    | .            | . | .                  | . | .      | . |
| .            | .            | . | .                  | . | .      | . |
| Vv16g0320    | Tc03_g002720 | . | .                  | . | Gorai. | . |
| 008G212200.1 | .            | . | .                  | . | .      | . |
| Vv16g0321    | .            | . | Gorai.003G111300.1 | . | .      | . |
| .            | .            | . | .                  | . | .      | . |
| Vv16g0322    | .            | . | .                  | . | .      | . |
| .            | .            | . | .                  | . | .      | . |
| Vv16g0323    | .            | . | .                  | . | .      | . |
| .            | .            | . | .                  | . | .      | . |
| Vv16g0324    | Tc03_g016340 | . | .                  | . | .      | . |
| .            | .            | . | .                  | . | .      | . |
| Vv16g0325    | .            | . | .                  | . | .      | . |
| .            | .            | . | .                  | . | .      | . |
| Vv16g0326    | .            | . | .                  | . | .      | . |
| .            | .            | . | .                  | . | .      | . |
| Vv16g0327    | .            | . | Gorai.003G111600.1 | . | .      | . |
| .            | .            | . | .                  | . | .      | . |
| Vv16g0328    | .            | . | .                  | . | .      | . |
| .            | .            | . | .                  | . | .      | . |
| Vv16g0329    | .            | . | .                  | . | .      | . |
| .            | .            | . | .                  | . | .      | . |
| Vv16g0330    | .            | . | .                  | . | .      | . |
| .            | .            | . | .                  | . | .      | . |
| Vv16g0331    | .            | . | .                  | . | .      | . |



|           |              |  |                    |  |  |  |
|-----------|--------------|--|--------------------|--|--|--|
| Vv16g0332 |              |  |                    |  |  |  |
| Vv16g0333 |              |  |                    |  |  |  |
| Vv16g0334 | Tc03_g016350 |  | Gorai.001G051800.1 |  |  |  |
| Vv16g0335 |              |  |                    |  |  |  |
| Vv16g0336 |              |  |                    |  |  |  |
| Vv16g0337 |              |  |                    |  |  |  |
| Vv16g0338 |              |  |                    |  |  |  |
| Vv16g0339 |              |  |                    |  |  |  |
| Vv16g0340 |              |  |                    |  |  |  |
| Vv16g0341 |              |  |                    |  |  |  |
| Vv16g0342 |              |  |                    |  |  |  |
| Vv16g0343 |              |  |                    |  |  |  |
| Vv16g0344 |              |  |                    |  |  |  |
| Vv16g0345 |              |  |                    |  |  |  |
| Vv16g0346 |              |  |                    |  |  |  |
| Vv16g0347 |              |  |                    |  |  |  |

|              |              |   |   |                    |   |        |   |
|--------------|--------------|---|---|--------------------|---|--------|---|
| Vv16g0348    | .            | . | . | .                  | . | .      | . |
| .            | .            | . | . | .                  | . | .      | . |
| Vv16g0349    | .            | . | . | .                  | . | .      | . |
| .            | .            | . | . | .                  | . | .      | . |
| Vv16g0350    | Tc03_g002470 | . | . | .                  | . | Gorai. | . |
| 008G233500.1 | .            | . | . | .                  | . | .      | . |
| .            | .            | . | . | .                  | . | .      | . |
| Vv16g0351    | .            | . | . | .                  | . | .      | . |
| .            | .            | . | . | .                  | . | .      | . |
| Vv16g0352    | .            | . | . | .                  | . | .      | . |
| .            | .            | . | . | .                  | . | .      | . |
| Vv16g0353    | .            | . | . | .                  | . | .      | . |
| .            | .            | . | . | .                  | . | .      | . |
| Vv16g0354    | .            | . | . | .                  | . | .      | . |
| .            | .            | . | . | .                  | . | .      | . |
| Vv16g0355    | .            | . | . | .                  | . | .      | . |
| .            | .            | . | . | .                  | . | .      | . |
| Vv16g0356    | .            | . | . | .                  | . | .      | . |
| .            | .            | . | . | .                  | . | .      | . |
| Vv16g0357    | .            | . | . | .                  | . | .      | . |
| .            | .            | . | . | .                  | . | .      | . |
| Vv16g0358    | .            | . | . | .                  | . | .      | . |
| .            | .            | . | . | .                  | . | .      | . |
| Vv16g0359    | Tc03_g013950 | . | . | Gorai.003G111700.1 | . | .      | . |
| .            | .            | . | . | .                  | . | .      | . |
| Vv16g0360    | .            | . | . | .                  | . | .      | . |
| .            | .            | . | . | .                  | . | .      | . |
| Vv16g0361    | .            | . | . | .                  | . | .      | . |
| .            | .            | . | . | .                  | . | .      | . |
| Vv16g0362    | Tc03_g016390 | . | . | .                  | . | Gorai. | . |
| 008G213300.1 | .            | . | . | .                  | . | .      | . |
| .            | .            | . | . | .                  | . | .      | . |
| Vv16g0363    | Tc03_g016400 | . | . | .                  | . | .      | . |
| .            | .            | . | . | .                  | . | .      | . |
| Vv16g0364    | .            | . | . | .                  | . | .      | . |
| .            | .            | . | . | .                  | . | .      | . |

|              |              |                    |                    |   |        |   |   |
|--------------|--------------|--------------------|--------------------|---|--------|---|---|
| Vv16g0365    | .            | .                  | .                  | . | .      | . | . |
| .            | .            | .                  | .                  | . | .      | . | . |
| Vv16g0366    | .            | .                  | .                  | . | .      | . | . |
| .            | .            | .                  | .                  | . | .      | . | . |
| Vv16g0367    | .            | .                  | .                  | . | .      | . | . |
| .            | .            | .                  | .                  | . | .      | . | . |
| Vv16g0368    | .            | .                  | .                  | . | .      | . | . |
| .            | .            | .                  | .                  | . | .      | . | . |
| Vv16g0369    | Tc03_g016480 | .                  | Gorai.001G051700.1 | . | .      | . | . |
| .            | .            | .                  | .                  | . | .      | . | . |
| Vv16g0370    | .            | .                  | .                  | . | .      | . | . |
| .            | .            | .                  | .                  | . | .      | . | . |
| Vv16g0371    | .            | .                  | .                  | . | .      | . | . |
| .            | .            | .                  | .                  | . | .      | . | . |
| Vv16g0372    | .            | .                  | .                  | . | .      | . | . |
| .            | .            | .                  | .                  | . | .      | . | . |
| Vv16g0373    | .            | .                  | .                  | . | .      | . | . |
| .            | .            | .                  | .                  | . | .      | . | . |
| Vv16g0374    | .            | .                  | .                  | . | .      | . | . |
| .            | .            | .                  | .                  | . | .      | . | . |
| Vv16g0375    | .            | Gorai.001G051500.1 | .                  | . | .      | . | . |
| .            | .            | .                  | .                  | . | .      | . | . |
| Vv16g0376    | .            | .                  | .                  | . | .      | . | . |
| .            | .            | .                  | .                  | . | .      | . | . |
| Vv16g0377    | Tc03_g016520 | .                  | Gorai.003G112000.1 | . | .      | . | . |
| .            | .            | .                  | .                  | . | .      | . | . |
| Vv16g0378    | .            | .                  | .                  | . | .      | . | . |
| .            | .            | .                  | .                  | . | .      | . | . |
| Vv16g0379    | .            | .                  | .                  | . | .      | . | . |
| .            | .            | .                  | .                  | . | .      | . | . |
| Vv16g0380    | Tc03_g016530 | .                  | .                  | . | Gorai. | . | . |
| 008G213800.1 | .            | .                  | .                  | . | .      | . | . |
| .            | .            | .                  | .                  | . | .      | . | . |
| Vv16g0381    | .            | .                  | .                  | . | .      | . | . |

|                    |              |                    |                    |   |
|--------------------|--------------|--------------------|--------------------|---|
| Vv16g0382          | Tc03_g016560 | Gorai.001G051400.1 | .                  | . |
| Vv16g0383          |              | Gorai.001G051300.1 | .                  | . |
| Gorai.008G213900.1 | .            | .                  | .                  | . |
| Vv16g0384          | .            | .                  | .                  | . |
| Vv16g0385          | Tc03_g016570 | Gorai.003G112200.1 | .                  | . |
| Gorai.008G232700.1 | .            | .                  | .                  | . |
| Vv16g0386          | .            | .                  | .                  | . |
| Vv16g0387          | Tc03_g013540 | .                  | .                  | . |
| Vv16g0388          | .            | .                  | .                  | . |
| Vv16g0389          | .            | .                  | .                  | . |
| Vv16g0390          | .            | .                  | .                  | . |
| Vv16g0391          | Tc03_g016600 | Gorai.001G051200.1 | .                  | . |
| Gorai.008G214000.1 | .            | .                  | .                  | . |
| Vv16g0392          | .            | .                  | Gorai.008G232600.1 | . |
| Vv16g0393          | .            | .                  | .                  | . |
| Vv16g0394          | Tc03_g016630 | Gorai.001G051100.1 | .                  | . |
| Vv16g0395          | .            | .                  | .                  | . |
| Vv16g0396          | Tc03_g013430 | .                  | Gorai.             | . |
| 008G232500.1       | .            | .                  | .                  | . |

|           |              |   |   |   |   |                    |   |
|-----------|--------------|---|---|---|---|--------------------|---|
| Vv16g0397 | .            | . | . | . | . | .                  | . |
| .         | .            | . | . | . | . | .                  | . |
| Vv16g0398 | .            | . | . | . | . | Gorai.008G230500.1 | . |
| .         | .            | . | . | . | . | .                  | . |
| Vv16g0399 | .            | . | . | . | . | .                  | . |
| .         | .            | . | . | . | . | .                  | . |
| Vv16g0400 | .            | . | . | . | . | .                  | . |
| .         | .            | . | . | . | . | .                  | . |
| Vv16g0401 | .            | . | . | . | . | .                  | . |
| .         | .            | . | . | . | . | .                  | . |
| Vv16g0402 | .            | . | . | . | . | .                  | . |
| .         | .            | . | . | . | . | .                  | . |
| Vv16g0403 | .            | . | . | . | . | .                  | . |
| .         | .            | . | . | . | . | .                  | . |
| Vv16g0404 | .            | . | . | . | . | .                  | . |
| .         | .            | . | . | . | . | .                  | . |
| Vv16g0405 | .            | . | . | . | . | .                  | . |
| .         | .            | . | . | . | . | .                  | . |
| Vv16g0406 | .            | . | . | . | . | .                  | . |
| .         | .            | . | . | . | . | .                  | . |
| Vv16g0407 | Tc03_g019360 | . | . | . | . | .                  | . |
| .         | .            | . | . | . | . | .                  | . |
| Vv16g0408 | .            | . | . | . | . | .                  | . |
| .         | .            | . | . | . | . | .                  | . |
| Vv16g0409 | .            | . | . | . | . | .                  | . |
| .         | .            | . | . | . | . | .                  | . |
| Vv16g0410 | .            | . | . | . | . | .                  | . |
| .         | .            | . | . | . | . | .                  | . |
| Vv16g0411 | .            | . | . | . | . | .                  | . |
| .         | .            | . | . | . | . | .                  | . |
| Vv16g0412 | .            | . | . | . | . | .                  | . |
| .         | .            | . | . | . | . | .                  | . |
| Vv16g0413 | .            | . | . | . | . | .                  | . |
| .         | .            | . | . | . | . | .                  | . |

|           |              |                    |                    |                    |   |
|-----------|--------------|--------------------|--------------------|--------------------|---|
| Vv16g0414 | Tc03_g019370 | .                  | .                  | .                  | . |
| .         | .            | .                  | .                  | .                  | . |
| Vv16g0415 | .            | .                  | .                  | .                  | . |
| .         | .            | .                  | .                  | .                  | . |
| Vv16g0416 | .            | .                  | .                  | .                  | . |
| .         | .            | .                  | .                  | .                  | . |
| Vv16g0417 | .            | .                  | .                  | .                  | . |
| .         | .            | .                  | .                  | .                  | . |
| Vv16g0418 | .            | .                  | .                  | .                  | . |
| .         | .            | .                  | .                  | .                  | . |
| Vv16g0419 | .            | .                  | .                  | .                  | . |
| .         | .            | .                  | .                  | .                  | . |
| Vv16g0420 | .            | .                  | .                  | .                  | . |
| .         | .            | .                  | .                  | .                  | . |
| Vv16g0421 | .            | .                  | .                  | .                  | . |
| .         | .            | .                  | .                  | .                  | . |
| Vv16g0422 | .            | .                  | .                  | .                  | . |
| .         | .            | .                  | .                  | .                  | . |
| Vv16g0423 | .            | .                  | .                  | .                  | . |
| .         | .            | .                  | .                  | .                  | . |
| Vv16g0424 | Tc03_g016640 | Gorai.001G051000.1 | .                  | .                  | . |
| .         | .            | .                  | .                  | .                  | . |
| Vv16g0425 | .            | .                  | .                  | .                  | . |
| .         | .            | .                  | .                  | .                  | . |
| Vv16g0426 | .            | .                  | .                  | .                  | . |
| .         | .            | .                  | .                  | .                  | . |
| Vv16g0427 | .            | .                  | .                  | .                  | . |
| .         | .            | .                  | .                  | .                  | . |
| Vv16g0428 | .            | .                  | .                  | Gorai.008G215500.1 | . |
| .         | .            | .                  | .                  | .                  | . |
| Vv16g0429 | .            | .                  | .                  | .                  | . |
| .         | .            | .                  | .                  | .                  | . |
| Vv16g0430 | .            | .                  | Gorai.003G113000.1 | .                  | . |

|                    |              |                    |                    |   |   |   |
|--------------------|--------------|--------------------|--------------------|---|---|---|
| Gorai.008G215600.1 | .            | .                  | .                  | . | . | . |
| .                  | .            | .                  | .                  | . | . | . |
| .                  | .            | .                  | .                  | . | . | . |
| Vv16g0431          | .            | .                  | .                  | . | . | . |
| .                  | .            | .                  | .                  | . | . | . |
| .                  | .            | .                  | .                  | . | . | . |
| Vv16g0432          | .            | .                  | Gorai.003G113100.1 | . | . | . |
| Gorai.008G215700.1 | .            | .                  | .                  | . | . | . |
| .                  | .            | .                  | .                  | . | . | . |
| .                  | .            | .                  | .                  | . | . | . |
| Vv16g0433          | .            | .                  | .                  | . | . | . |
| .                  | .            | .                  | .                  | . | . | . |
| .                  | .            | .                  | .                  | . | . | . |
| Vv16g0434          | .            | .                  | Gorai.003G113200.1 | . | . | . |
| .                  | .            | .                  | .                  | . | . | . |
| .                  | .            | .                  | .                  | . | . | . |
| Vv16g0435          | .            | .                  | .                  | . | . | . |
| .                  | .            | .                  | .                  | . | . | . |
| .                  | .            | .                  | .                  | . | . | . |
| Vv16g0436          | .            | .                  | .                  | . | . | . |
| .                  | .            | .                  | .                  | . | . | . |
| .                  | .            | .                  | .                  | . | . | . |
| Vv16g0437          | .            | .                  | .                  | . | . | . |
| .                  | .            | .                  | .                  | . | . | . |
| .                  | .            | .                  | .                  | . | . | . |
| Vv16g0438          | Tc03_g019480 | .                  | .                  | . | . | . |
| .                  | .            | .                  | .                  | . | . | . |
| .                  | .            | .                  | .                  | . | . | . |
| Vv16g0439          | .            | .                  | .                  | . | . | . |
| .                  | .            | .                  | .                  | . | . | . |
| .                  | .            | .                  | .                  | . | . | . |
| Vv16g0440          | Tc03_g016990 | Gorai.001G049000.1 | .                  | . | . | . |
| .                  | .            | .                  | .                  | . | . | . |
| .                  | .            | .                  | .                  | . | . | . |
| Vv16g0441          | .            | .                  | .                  | . | . | . |
| .                  | .            | .                  | .                  | . | . | . |
| .                  | .            | .                  | .                  | . | . | . |
| Vv16g0442          | .            | .                  | .                  | . | . | . |
| .                  | .            | .                  | .                  | . | . | . |
| .                  | .            | .                  | .                  | . | . | . |
| Vv16g0443          | .            | .                  | .                  | . | . | . |
| .                  | .            | .                  | .                  | . | . | . |
| .                  | .            | .                  | .                  | . | . | . |
| Vv16g0444          | .            | .                  | .                  | . | . | . |
| .                  | .            | .                  | .                  | . | . | . |
| .                  | .            | .                  | .                  | . | . | . |
| Vv16g0445          | .            | .                  | .                  | . | . | . |
| .                  | .            | .                  | .                  | . | . | . |
| .                  | .            | .                  | .                  | . | . | . |
| Vv16g0446          | .            | .                  | .                  | . | . | . |

|           |   |   |   |   |   |   |   |
|-----------|---|---|---|---|---|---|---|
| .         | . | . | . | . | . | . | . |
| Vv16g0447 | . | . | . | . | . | . | . |
| .         | . | . | . | . | . | . | . |
| Vv16g0448 | . | . | . | . | . | . | . |
| .         | . | . | . | . | . | . | . |
| Vv16g0449 | . | . | . | . | . | . | . |
| .         | . | . | . | . | . | . | . |
| Vv16g0450 | . | . | . | . | . | . | . |
| .         | . | . | . | . | . | . | . |
| Vv16g0451 | . | . | . | . | . | . | . |
| .         | . | . | . | . | . | . | . |
| Vv16g0452 | . | . | . | . | . | . | . |
| .         | . | . | . | . | . | . | . |
| Vv16g0453 | . | . | . | . | . | . | . |
| .         | . | . | . | . | . | . | . |
| Vv16g0454 | . | . | . | . | . | . | . |
| .         | . | . | . | . | . | . | . |
| Vv16g0455 | . | . | . | . | . | . | . |
| .         | . | . | . | . | . | . | . |
| Vv16g0456 | . | . | . | . | . | . | . |
| .         | . | . | . | . | . | . | . |
| Vv16g0457 | . | . | . | . | . | . | . |
| .         | . | . | . | . | . | . | . |
| Vv16g0458 | . | . | . | . | . | . | . |
| .         | . | . | . | . | . | . | . |
| Vv16g0459 | . | . | . | . | . | . | . |
| .         | . | . | . | . | . | . | . |
| Vv16g0460 | . | . | . | . | . | . | . |
| .         | . | . | . | . | . | . | . |
| Vv16g0461 | . | . | . | . | . | . | . |
| .         | . | . | . | . | . | . | . |
| Vv16g0462 | . | . | . | . | . | . | . |
| .         | . | . | . | . | . | . | . |
| .         | . | . | . | . | . | . | . |



|           |              |   |   |   |   |   |   |
|-----------|--------------|---|---|---|---|---|---|
| Vv16g0463 | .            | . | . | . | . | . | . |
| .         | .            | . | . | . | . | . | . |
| Vv16g0464 | .            | . | . | . | . | . | . |
| .         | .            | . | . | . | . | . | . |
| Vv16g0465 | .            | . | . | . | . | . | . |
| .         | .            | . | . | . | . | . | . |
| Vv16g0466 | Tc03_g004410 | . | . | . | . | . | . |
| .         | .            | . | . | . | . | . | . |
| Vv16g0467 | .            | . | . | . | . | . | . |
| .         | .            | . | . | . | . | . | . |
| Vv16g0468 | .            | . | . | . | . | . | . |
| .         | .            | . | . | . | . | . | . |
| Vv16g0469 | .            | . | . | . | . | . | . |
| .         | .            | . | . | . | . | . | . |
| Vv16g0470 | .            | . | . | . | . | . | . |
| .         | .            | . | . | . | . | . | . |
| Vv16g0471 | Tc03_g004110 | . | . | . | . | . | . |
| .         | .            | . | . | . | . | . | . |
| Vv16g0472 | Tc03_g004080 | . | . | . | . | . | . |
| .         | .            | . | . | . | . | . | . |
| Vv16g0473 | .            | . | . | . | . | . | . |
| .         | .            | . | . | . | . | . | . |
| Vv16g0474 | Tc03_g017330 | . | . | . | . | . | . |
| .         | .            | . | . | . | . | . | . |
| Vv16g0475 | .            | . | . | . | . | . | . |
| .         | .            | . | . | . | . | . | . |
| Vv16g0476 | .            | . | . | . | . | . | . |
| .         | .            | . | . | . | . | . | . |
| Vv16g0477 | Tc03_g017340 | . | . | . | . | . | . |
| .         | .            | . | . | . | . | . | . |
| Vv16g0478 | .            | . | . | . | . | . | . |
| .         | .            | . | . | . | . | . | . |
| Vv16g0479 | Tc03_g017360 | . | . | . | . | . | . |
| .         | .            | . | . | . | . | . | . |

|           |              |   |   |   |                    |   |   |
|-----------|--------------|---|---|---|--------------------|---|---|
| Vv16g0480 | .            | . | . | . | .                  | . | . |
| .         | .            | . | . | . | .                  | . | . |
| Vv16g0481 | Tc03_g017370 | . | . | . | .                  | . | . |
| .         | .            | . | . | . | .                  | . | . |
| Vv16g0482 | Tc03_g022290 | . | . | . | Gorai.007G018200.1 | . | . |
| .         | .            | . | . | . | .                  | . | . |
| Vv16g0483 | .            | . | . | . | .                  | . | . |
| .         | .            | . | . | . | .                  | . | . |
| Vv16g0484 | .            | . | . | . | .                  | . | . |
| .         | .            | . | . | . | .                  | . | . |
| Vv16g0485 | .            | . | . | . | .                  | . | . |
| .         | .            | . | . | . | .                  | . | . |
| Vv16g0486 | .            | . | . | . | .                  | . | . |
| .         | .            | . | . | . | .                  | . | . |
| Vv16g0487 | .            | . | . | . | .                  | . | . |
| .         | .            | . | . | . | .                  | . | . |
| Vv16g0488 | .            | . | . | . | .                  | . | . |
| .         | .            | . | . | . | .                  | . | . |
| Vv16g0489 | .            | . | . | . | .                  | . | . |
| .         | .            | . | . | . | .                  | . | . |
| Vv16g0490 | .            | . | . | . | .                  | . | . |
| .         | .            | . | . | . | .                  | . | . |
| Vv16g0491 | .            | . | . | . | .                  | . | . |
| .         | .            | . | . | . | .                  | . | . |
| Vv16g0492 | .            | . | . | . | .                  | . | . |
| .         | .            | . | . | . | .                  | . | . |
| Vv16g0493 | .            | . | . | . | .                  | . | . |
| .         | .            | . | . | . | .                  | . | . |
| Vv16g0494 | .            | . | . | . | .                  | . | . |
| .         | .            | . | . | . | .                  | . | . |
| Vv16g0495 | .            | . | . | . | .                  | . | . |
| .         | .            | . | . | . | .                  | . | . |
| Vv16g0496 | .            | . | . | . | .                  | . | . |

|              |              |   |   |   |   |        |   |
|--------------|--------------|---|---|---|---|--------|---|
| .            | .            | . | . | . | . | .      | . |
| .            | .            | . | . | . | . | .      | . |
| Vv16g0497    | .            | . | . | . | . | .      | . |
| .            | .            | . | . | . | . | .      | . |
| Vv16g0498    | Tc03_g017380 | . | . | . | . | .      | . |
| .            | .            | . | . | . | . | .      | . |
| Vv16g0499    | .            | . | . | . | . | .      | . |
| .            | .            | . | . | . | . | .      | . |
| Vv16g0500    | .            | . | . | . | . | .      | . |
| .            | .            | . | . | . | . | .      | . |
| Vv16g0501    | .            | . | . | . | . | .      | . |
| .            | .            | . | . | . | . | .      | . |
| Vv16g0502    | .            | . | . | . | . | .      | . |
| .            | .            | . | . | . | . | .      | . |
| Vv16g0503    | .            | . | . | . | . | .      | . |
| .            | .            | . | . | . | . | .      | . |
| Vv16g0504    | .            | . | . | . | . | .      | . |
| .            | .            | . | . | . | . | .      | . |
| Vv16g0505    | .            | . | . | . | . | .      | . |
| .            | .            | . | . | . | . | .      | . |
| Vv16g0506    | .            | . | . | . | . | .      | . |
| .            | .            | . | . | . | . | .      | . |
| Vv16g0507    | .            | . | . | . | . | .      | . |
| .            | .            | . | . | . | . | .      | . |
| Vv16g0508    | .            | . | . | . | . | .      | . |
| .            | .            | . | . | . | . | .      | . |
| Vv16g0509    | .            | . | . | . | . | .      | . |
| .            | .            | . | . | . | . | .      | . |
| Vv16g0510    | Tc03_g017710 | . | . | . | . | .      | . |
| .            | .            | . | . | . | . | .      | . |
| Vv16g0511    | Tc03_g022180 | . | . | . | . | .      | . |
| .            | .            | . | . | . | . | .      | . |
| Vv16g0512    | Tc03_g022170 | . | . | . | . | Gorai. | . |
| 008G262800.1 | .            | . | . | . | . | .      | . |
| .            | .            | . | . | . | . | .      | . |

|                    |              |   |   |   |                    |   |
|--------------------|--------------|---|---|---|--------------------|---|
| Vv16g0513          | Tc03_g022160 | . | . | . | .                  | . |
| .                  | .            | . | . | . | .                  | . |
| Vv16g0514          | .            | . | . | . | .                  | . |
| .                  | .            | . | . | . | .                  | . |
| Vv16g0515          | Tc03_g022140 | . | . | . | Gorai.007G017700.1 | . |
| Gorai.008G262900.1 | .            | . | . | . | .                  | . |
| .                  | .            | . | . | . | .                  | . |
| Vv16g0516          | .            | . | . | . | .                  | . |
| .                  | .            | . | . | . | .                  | . |
| Vv16g0517          | .            | . | . | . | .                  | . |
| .                  | .            | . | . | . | .                  | . |
| Vv16g0518          | .            | . | . | . | .                  | . |
| .                  | .            | . | . | . | .                  | . |
| Vv16g0519          | Tc03_g022120 | . | . | . | .                  | . |
| .                  | .            | . | . | . | .                  | . |
| Vv16g0520          | .            | . | . | . | .                  | . |
| .                  | .            | . | . | . | .                  | . |
| Vv16g0521          | .            | . | . | . | .                  | . |
| .                  | .            | . | . | . | .                  | . |
| Vv16g0522          | Tc03_g022100 | . | . | . | Gorai.             | . |
| 008G263000.1       | .            | . | . | . | .                  | . |
| .                  | .            | . | . | . | .                  | . |
| Vv16g0523          | .            | . | . | . | .                  | . |
| .                  | .            | . | . | . | .                  | . |
| Vv16g0524          | Tc03_g022070 | . | . | . | Gorai.             | . |
| 008G263400.1       | .            | . | . | . | .                  | . |
| .                  | .            | . | . | . | .                  | . |
| Vv16g0525          | .            | . | . | . | Gorai.008G263400.1 | . |
| .                  | .            | . | . | . | .                  | . |
| Vv16g0526          | .            | . | . | . | Gorai.007G115000.1 | . |
| .                  | .            | . | . | . | .                  | . |
| Vv16g0527          | .            | . | . | . | .                  | . |
| .                  | .            | . | . | . | .                  | . |
| Vv16g0528          | Tc03_g022050 | . | . | . | Gorai.007G114700.1 | . |
| Gorai.008G263600.1 | .            | . | . | . | .                  | . |
| .                  | .            | . | . | . | .                  | . |
| .                  | .            | . | . | . | .                  | . |

|                    |              |   |                    |                    |        |
|--------------------|--------------|---|--------------------|--------------------|--------|
| Vv16g0529          | Tc03_g022030 | . | .                  | .                  | .      |
| .                  | .            | . | .                  | .                  | .      |
| Vv16g0530          | Tc03_g022020 | . | .                  | .                  | Gorai. |
| 008G262000.1       | .            | . | .                  | .                  | .      |
| .                  | .            | . | .                  | .                  | .      |
| Vv16g0531          | Tc03_g021990 | . | .                  | Gorai.007G114600.1 | .      |
| .                  | Vv15g0482    | . | Tc01_g033450       | .                  | .      |
| .                  | .            | . | .                  | .                  | .      |
| Vv16g0532          | Tc03_g021980 | . | .                  | Gorai.007G017500.1 | .      |
| .                  | .            | . | .                  | .                  | .      |
| Vv16g0533          | .            | . | .                  | .                  | .      |
| .                  | .            | . | .                  | .                  | .      |
| Vv16g0534          | Tc03_g021930 | . | .                  | .                  | .      |
| .                  | .            | . | .                  | .                  | .      |
| Vv16g0535          | .            | . | .                  | .                  | .      |
| .                  | .            | . | .                  | .                  | .      |
| Vv16g0536          | Tc03_g021920 | . | .                  | .                  | Gorai. |
| 008G263900.1       | .            | . | .                  | .                  | .      |
| .                  | .            | . | .                  | .                  | .      |
| Vv16g0537          | .            | . | .                  | .                  | .      |
| .                  | .            | . | .                  | .                  | .      |
| Vv16g0538          | Tc03_g021910 | . | .                  | .                  | Gorai. |
| 008G264000.1       | Vv02g0309    | . | Tc03_g015160       | .                  | Gorai. |
| 004G128100.1       | .            | . | Gorai.008G261300.1 | .                  | Gorai. |
| 006G204300.1       | .            | . | .                  | .                  | .      |
| Vv16g0539          | .            | . | .                  | .                  | .      |
| .                  | .            | . | .                  | .                  | .      |
| Vv16g0540          | Tc03_g021880 | . | .                  | .                  | Gorai. |
| 008G264300.1       | .            | . | .                  | .                  | .      |
| .                  | .            | . | .                  | .                  | .      |
| Vv16g0541          | Tc03_g021870 | . | .                  | .                  | Gorai. |
| 008G264600.1       | .            | . | .                  | .                  | .      |
| .                  | .            | . | .                  | .                  | .      |
| Vv16g0542          | .            | . | .                  | .                  | .      |
| .                  | .            | . | .                  | .                  | .      |
| Vv16g0543          | Tc03_g021860 | . | .                  | Gorai.007G017400.1 | .      |
| .                  | .            | . | .                  | .                  | .      |
| Vv16g0544          | Tc03_g021850 | . | .                  | .                  | Gorai. |
| 008G260800.1       | Vv02g0303    | . | .                  | .                  | .      |
| Gorai.008G260800.1 | .            | . | Vv15g0505          | .                  | .      |

|                    |              |              |              |                    |
|--------------------|--------------|--------------|--------------|--------------------|
| Vv16g0545          | .            | .            | .            | Gorai.008G260600.1 |
| .                  | Vv02g0302    | .            | .            | .                  |
| Gorai.008G264900.1 | .            | Vv15g0508    | .            | .                  |
| .                  | .            | .            | .            | .                  |
| Vv16g0546          | Tc03_g021840 | .            | .            | Gorai.             |
| 008G265000.1       | .            | .            | .            | .                  |
| .                  | .            | .            | .            | .                  |
| Vv16g0547          | Tc03_g021830 | .            | .            | .                  |
| .                  | .            | .            | .            | .                  |
| .                  | .            | .            | .            | .                  |
| Vv16g0548          | Tc03_g021800 | .            | .            | Gorai.007G017300.1 |
| .                  | .            | .            | .            | .                  |
| .                  | .            | .            | .            | .                  |
| Vv16g0549          | Tc03_g021790 | .            | .            | Gorai.007G017200.1 |
| .                  | .            | .            | .            | .                  |
| .                  | Vv15g0515    | Tc01_g033640 | .            | .                  |
| .                  | .            | .            | .            | .                  |
| Vv16g0550          | Tc03_g021780 | .            | .            | Gorai.007G113000.1 |
| Gorai.008G265100.1 | .            | .            | .            | .                  |
| .                  | .            | Vv15g0516    | Tc01_g033650 | .                  |
| .                  | .            | .            | .            | .                  |
| Vv16g0551          | .            | .            | .            | .                  |
| .                  | .            | .            | .            | .                  |
| .                  | .            | .            | .            | .                  |
| Vv16g0552          | Tc03_g021770 | .            | .            | .                  |
| .                  | .            | .            | .            | .                  |
| .                  | .            | .            | .            | .                  |
| Vv16g0553          | Tc03_g021760 | .            | .            | .                  |
| .                  | .            | .            | .            | .                  |
| .                  | .            | .            | .            | .                  |
| Vv16g0554          | .            | .            | .            | .                  |
| .                  | .            | .            | .            | .                  |
| .                  | .            | .            | .            | .                  |
| Vv16g0555          | .            | .            | .            | .                  |
| .                  | .            | .            | .            | .                  |
| .                  | .            | .            | .            | .                  |
| Vv16g0556          | .            | .            | .            | .                  |
| .                  | .            | .            | .            | .                  |
| .                  | .            | .            | .            | .                  |
| Vv16g0557          | Tc03_g021740 | .            | .            | .                  |
| .                  | .            | .            | .            | .                  |
| .                  | .            | .            | .            | .                  |
| Vv16g0558          | .            | .            | .            | .                  |
| .                  | .            | .            | .            | .                  |
| .                  | .            | .            | .            | .                  |
| Vv16g0559          | Tc03_g021690 | .            | .            | .                  |
| Vv02g0287          | .            | .            | .            | .                  |
| .                  | .            | .            | .            | .                  |
| Vv16g0560          | .            | .            | .            | .                  |

|                    |              |              |   |                    |   |   |
|--------------------|--------------|--------------|---|--------------------|---|---|
| .                  | .            | .            | . | .                  | . | . |
| .                  | .            | .            | . | .                  | . | . |
| Vv16g0561          | Tc03_g021670 | .            | . | Gorai.007G017000.1 | . | . |
| .                  | .            | .            | . | .                  | . | . |
| .                  | .            | .            | . | .                  | . | . |
| Vv16g0562          | .            | .            | . | .                  | . | . |
| .                  | .            | .            | . | .                  | . | . |
| .                  | .            | .            | . | .                  | . | . |
| Vv16g0563          | Tc03_g021660 | .            | . | .                  | . | . |
| .                  | .            | .            | . | .                  | . | . |
| .                  | .            | .            | . | .                  | . | . |
| Vv16g0564          | Tc03_g021650 | .            | . | Gorai.007G016900.1 | . | . |
| .                  | .            | .            | . | .                  | . | . |
| .                  | .            | .            | . | .                  | . | . |
| Vv16g0565          | Tc03_g021640 | .            | . | .                  | . | . |
| .                  | .            | .            | . | .                  | . | . |
| .                  | .            | .            | . | .                  | . | . |
| Vv16g0566          | Tc03_g021620 | .            | . | Gorai.             | . | . |
| 008G265500.1       | .            | .            | . | .                  | . | . |
| .                  | .            | .            | . | .                  | . | . |
| Vv16g0567          | Tc03_g021610 | .            | . | .                  | . | . |
| Vv02g0275          | .            | .            | . | Gorai.007G019100.1 | . | . |
| Gorai.008G259600.1 | .            | .            | . | Vv15g0531          | . | . |
| Tc01_g033790       | .            | .            | . | .                  | . | . |
| Vv16g0568          | Tc03_g021600 | .            | . | Gorai.             | . | . |
| 008G265600.1       | .            | .            | . | .                  | . | . |
| .                  | .            | .            | . | .                  | . | . |
| Vv16g0569          | .            | .            | . | .                  | . | . |
| .                  | .            | .            | . | .                  | . | . |
| .                  | .            | .            | . | .                  | . | . |
| Vv16g0570          | Tc03_g021590 | .            | . | .                  | . | . |
| .                  | .            | .            | . | .                  | . | . |
| .                  | .            | .            | . | .                  | . | . |
| Vv16g0571          | Tc03_g021580 | .            | . | Gorai.             | . | . |
| 008G265700.1       | .            | .            | . | .                  | . | . |
| .                  | .            | .            | . | .                  | . | . |
| Vv16g0572          | Tc03_g021570 | .            | . | Gorai.003G122900.1 | . | . |
| .                  | .            | .            | . | .                  | . | . |
| .                  | Vv15g0541    | Tc01_g033890 | . | .                  | . | . |
| .                  | .            | .            | . | .                  | . | . |
| Vv16g0573          | Tc03_g021560 | .            | . | Gorai.             | . | . |
| 008G265800.1       | .            | .            | . | .                  | . | . |
| .                  | .            | .            | . | .                  | . | . |
| Vv16g0574          | Tc03_g021550 | .            | . | .                  | . | . |
| .                  | .            | .            | . | .                  | . | . |
| .                  | .            | .            | . | .                  | . | . |
| Vv16g0575          | Tc03_g021540 | .            | . | Gorai.             | . | . |
| 008G265900.1       | .            | .            | . | .                  | . | . |
| .                  | .            | .            | . | .                  | . | . |
| Vv16g0576          | Tc03_g021530 | .            | . | .                  | . | . |

|                    |                    |   |                    |                    |   |   |   |
|--------------------|--------------------|---|--------------------|--------------------|---|---|---|
| .                  | .                  | . | .                  | .                  | . | . | . |
| .                  | .                  | . | .                  | .                  | . | . | . |
| Vv16g0577          | .                  | . | .                  | .                  | . | . | . |
| .                  | .                  | . | .                  | .                  | . | . | . |
| .                  | .                  | . | .                  | .                  | . | . | . |
| Vv16g0578          | Tc03_g021520       | . | .                  | Gorai.007G111400.1 | . | . | . |
| Gorai.008G258900.1 | .                  | . | .                  | Vv02g0264          | . | . | . |
| Tc03_g029890       | .                  | . | Gorai.007G111400.1 | Gorai.             | . | . | . |
| 008G258900.1       | Vv15g0552          | . | Tc01_g033980       | .                  | . | . | . |
| .                  | .                  | . | .                  | .                  | . | . | . |
| Vv16g0579          | Tc03_g021510       | . | .                  | .                  | . | . | . |
| .                  | .                  | . | .                  | .                  | . | . | . |
| .                  | .                  | . | .                  | .                  | . | . | . |
| Vv16g0580          | Tc03_g021500       | . | .                  | Gorai.007G016700.1 | . | . | . |
| Gorai.008G266000.1 | .                  | . | .                  | .                  | . | . | . |
| .                  | .                  | . | Vv15g0554          | .                  | . | . | . |
| .                  | .                  | . | .                  | .                  | . | . | . |
| Vv16g0581          | Tc03_g021480       | . | .                  | Gorai.             | . | . | . |
| 008G266100.1       | .                  | . | .                  | .                  | . | . | . |
| .                  | .                  | . | .                  | .                  | . | . | . |
| Vv16g0582          | Tc03_g021470       | . | .                  | Gorai.007G016600.1 | . | . | . |
| Gorai.008G258300.1 | .                  | . | Vv02g0258          | .                  | . | . | . |
| .                  | Gorai.007G020000.1 | . | Gorai.008G258300.1 | .                  | . | . | . |
| .                  | .                  | . | .                  | .                  | . | . | . |
| Vv16g0583          | Tc03_g021460       | . | Gorai.003G122800.1 | .                  | . | . | . |
| Gorai.008G266200.1 | .                  | . | .                  | .                  | . | . | . |
| .                  | .                  | . | .                  | .                  | . | . | . |
| .                  | .                  | . | .                  | .                  | . | . | . |
| Vv16g0584          | .                  | . | .                  | .                  | . | . | . |
| .                  | .                  | . | .                  | .                  | . | . | . |
| .                  | .                  | . | .                  | .                  | . | . | . |
| Vv16g0585          | Tc03_g021450       | . | Gorai.003G122700.1 | .                  | . | . | . |
| .                  | Vv02g0254          | . | .                  | Gorai.             | . | . | . |
| 003G122700.1       | .                  | . | .                  | .                  | . | . | . |
| .                  | .                  | . | .                  | .                  | . | . | . |
| Vv16g0586          | .                  | . | .                  | .                  | . | . | . |
| .                  | .                  | . | .                  | .                  | . | . | . |
| .                  | .                  | . | .                  | .                  | . | . | . |
| Vv16g0587          | Tc03_g021440       | . | .                  | .                  | . | . | . |
| .                  | .                  | . | .                  | .                  | . | . | . |
| .                  | .                  | . | .                  | .                  | . | . | . |
| Vv16g0588          | Tc03_g021430       | . | Gorai.003G122600.1 | .                  | . | . | . |
| Gorai.007G110900.1 | .                  | . | .                  | .                  | . | . | . |
| .                  | .                  | . | .                  | .                  | . | . | . |
| .                  | .                  | . | .                  | .                  | . | . | . |
| Vv16g0589          | Tc03_g021420       | . | .                  | Gorai.             | . | . | . |
| 008G266300.1       | .                  | . | .                  | .                  | . | . | . |
| .                  | .                  | . | .                  | .                  | . | . | . |
| Vv16g0590          | Tc03_g021400       | . | .                  | .                  | . | . | . |
| .                  | .                  | . | .                  | .                  | . | . | . |



|                    |                    |   |                    |                    |
|--------------------|--------------------|---|--------------------|--------------------|
| Vv16g0591          | Tc03_g021390       | . | .                  | Gorai.007G016500.1 |
|                    | Gorai.008G266400.1 | . | Vv02g0245          | .                  |
| Gorai.004G130100.1 | .                  | . | Gorai.008G266400.1 | .                  |
| Vv16g0592          | Tc03_g021380       | . | Gorai.003G122500.1 | .                  |
| .                  | .                  | . | .                  | .                  |
| Vv16g0593          | Tc03_g021370       | . | .                  | Gorai.             |
| 008G266500.1       | .                  | . | .                  | .                  |
| Vv16g0594          | Tc03_g021340       | . | .                  | .                  |
| .                  | .                  | . | .                  | .                  |
| Vv16g0595          | .                  | . | .                  | .                  |
| .                  | .                  | . | .                  | .                  |
| Vv16g0596          | Tc03_g021330       | . | .                  | .                  |
| .                  | .                  | . | .                  | .                  |
| Vv16g0597          | .                  | . | Gorai.007G016300.1 | .                  |
| .                  | Vv02g0242          | . | Gorai.004G130200.1 | .                  |
| .                  | .                  | . | .                  | .                  |
| Vv16g0598          | Tc03_g021320       | . | .                  | Gorai.007G016200.1 |
| .                  | .                  | . | .                  | .                  |
| Vv16g0599          | Tc03_g021300       | . | Gorai.003G122200.1 | .                  |
| Gorai.007G016100.1 | Gorai.008G257400.1 | . | .                  | Vv02g0241          |
| .                  | Gorai.004G130300.1 | . | Gorai.003G122200.1 | .                  |
| Gorai.008G257400.1 | .                  | . | Vv0Unrg3035        | .                  |
| Vv16g0600          | .                  | . | .                  | .                  |
| .                  | .                  | . | .                  | .                  |
| Vv16g0601          | Tc03_g021280       | . | .                  | .                  |
| .                  | .                  | . | .                  | .                  |
| Vv16g0602          | Tc03_g021270       | . | .                  | Gorai.             |
| 008G266900.1       | .                  | . | .                  | .                  |
| Vv16g0603          | Tc03_g021260       | . | .                  | Gorai.             |
| 008G267000.1       | Vv02g0229          | . | Tc03_g012980       | .                  |
| Gorai.003G076400.1 | .                  | . | Gorai.008G256800.1 | Gorai.             |
| 006G206100.1       | Vv0Unrg3026        | . | .                  | .                  |
| Vv16g0604          | .                  | . | .                  | .                  |
| .                  | .                  | . | .                  | .                  |
| Vv16g0605          | Tc03_g021250       | . | .                  | .                  |

|                    |                    |                    |
|--------------------|--------------------|--------------------|
| Vv16g0606          | Tc03_g021240       | Gorai.003G122100.1 |
| Vv16g0607          | Tc03_g021230       | Gorai.003G122000.1 |
| Gorai.007G110600.1 | Gorai.008G267100.1 |                    |
| Vv16g0608          |                    |                    |
| Vv16g0609          | Tc03_g021210       |                    |
| Vv16g0610          |                    |                    |
| Vv16g0611          | Tc03_g021200       | Gorai.003G121900.1 |
| Vv16g0612          | Tc03_g021190       |                    |
| Vv16g0613          | Tc03_g021180       |                    |
| Vv02g0217          | Tc03_g029430       | Gorai.004G131400.1 |
| Gorai.007G020600.1 |                    |                    |
| Vv16g0614          |                    |                    |
| Vv16g0615          |                    |                    |
| Vv16g0616          |                    |                    |
| Vv16g0617          | Tc03_g021160       | Gorai.             |
| 008G267400.1       |                    |                    |
| Vv16g0618          | Tc03_g021140       | Gorai.             |
| 008G267600.1       |                    |                    |
| Vv16g0619          |                    | Gorai.008G267800.1 |
| Vv16g0620          |                    |                    |
| Vv16g0621          | Tc03_g021120       |                    |

|                    |                    |             |                    |        |
|--------------------|--------------------|-------------|--------------------|--------|
| Vv02g0215          | Tc03_g029400       | .           | .                  | Gorai. |
| 007G110100.1       | Gorai.006G206300.1 | .           | Vv0Unrg3017        | .      |
| Vv16g0622          | Tc03_g021100       | .           | Gorai.007G109800.1 | .      |
| .                  | Vv0Unrg3013        | .           | .                  | .      |
| Vv16g0623          | Tc03_g021090       | .           | Gorai.             | .      |
| 008G267900.1       | .                  | .           | .                  | .      |
| Vv16g0624          | Tc03_g021080       | .           | .                  | .      |
| .                  | .                  | .           | .                  | .      |
| Vv16g0625          | Tc03_g021070       | .           | Gorai.003G121700.1 | .      |
| .                  | .                  | .           | .                  | .      |
| Vv16g0626          | .                  | .           | Gorai.008G256500.1 | .      |
| .                  | .                  | .           | .                  | .      |
| Vv16g0627          | Tc03_g021060       | .           | Gorai.003G121600.1 | .      |
| .                  | Vv02g0213          | .           | .                  | .      |
| .                  | .                  | .           | .                  | .      |
| Vv16g0628          | Tc03_g021050       | .           | Gorai.003G121500.1 | .      |
| Gorai.008G268100.1 | .                  | .           | .                  | .      |
| .                  | .                  | Vv0Unrg3010 | .                  | .      |
| Vv16g0629          | Tc03_g021040       | .           | Gorai.003G119000.1 | .      |
| Gorai.008G268200.1 | .                  | .           | .                  | .      |
| .                  | .                  | .           | .                  | .      |
| Vv16g0630          | Tc03_g021030       | .           | Gorai.             | .      |
| 008G268300.1       | .                  | .           | .                  | .      |
| Vv16g0631          | Tc03_g021020       | .           | Gorai.             | .      |
| 008G268400.1       | .                  | .           | .                  | .      |
| Vv16g0632          | Tc03_g021010       | .           | .                  | .      |
| .                  | .                  | .           | .                  | .      |
| Vv16g0633          | Tc03_g021000       | .           | Gorai.             | .      |
| 008G268500.1       | .                  | .           | .                  | .      |
| Vv16g0634          | .                  | .           | .                  | .      |
| .                  | .                  | .           | .                  | .      |
| Vv16g0635          | .                  | .           | Gorai.007G015700.1 | .      |
| Gorai.008G268600.1 | .                  | .           | .                  | .      |
| .                  | .                  | .           | .                  | .      |
| .                  | .                  | .           | .                  | .      |

|                    |                    |                    |           |              |                    |   |   |
|--------------------|--------------------|--------------------|-----------|--------------|--------------------|---|---|
| Vv16g0636          | .                  | .                  | .         | .            | .                  | . | . |
| .                  | .                  | .                  | .         | .            | .                  | . | . |
| Vv16g0637          | .                  | .                  | .         | .            | Gorai.007G109100.1 | . | . |
| Gorai.008G268700.1 | .                  | .                  | .         | .            | .                  | . | . |
| .                  | .                  | Vv0Unrg3004        | .         | .            | .                  | . | . |
| .                  | .                  | .                  | .         | .            | .                  | . | . |
| Vv16g0638          | Tc03_g020920       | .                  | .         | .            | .                  | . | . |
| .                  | .                  | .                  | .         | .            | .                  | . | . |
| Vv16g0639          | Tc03_g020910       | .                  | .         | .            | Gorai.007G108500.1 | . | . |
| .                  | .                  | Vv02g0173          | .         | .            | .                  | . | . |
| Gorai.007G108500.1 | .                  | .                  | .         | Vv0Unrg2999  | .                  | . | . |
| .                  | .                  | .                  | .         | .            | .                  | . | . |
| Vv16g0640          | .                  | .                  | .         | .            | Gorai.008G268800.1 | . | . |
| .                  | .                  | .                  | .         | .            | .                  | . | . |
| Vv16g0641          | .                  | .                  | .         | .            | .                  | . | . |
| .                  | .                  | .                  | .         | .            | .                  | . | . |
| Vv16g0642          | .                  | .                  | .         | .            | .                  | . | . |
| .                  | .                  | .                  | .         | .            | .                  | . | . |
| Vv16g0643          | .                  | .                  | .         | .            | .                  | . | . |
| .                  | .                  | .                  | .         | .            | .                  | . | . |
| Vv16g0644          | .                  | .                  | .         | .            | Gorai.007G108300.1 | . | . |
| Gorai.008G255200.1 | .                  | .                  | Vv02g0167 | Tc03_g029130 | .                  | . | . |
| Gorai.004G132400.1 | Gorai.003G078600.1 | Gorai.007G108300.1 | .         | .            | .                  | . | . |
| Gorai.008G255600.1 | .                  | Vv0Unrg2994        | .         | .            | .                  | . | . |
| .                  | .                  | .                  | .         | .            | .                  | . | . |
| Vv16g0645          | .                  | .                  | .         | .            | .                  | . | . |
| .                  | .                  | .                  | .         | .            | .                  | . | . |
| Vv16g0646          | .                  | .                  | .         | .            | .                  | . | . |
| .                  | .                  | .                  | .         | .            | .                  | . | . |
| Vv16g0647          | .                  | .                  | .         | .            | .                  | . | . |
| .                  | .                  | .                  | .         | .            | .                  | . | . |
| Vv17g0001          | .                  | .                  | .         | .            | .                  | . | . |
| .                  | .                  | .                  | .         | .            | .                  | . | . |
| Vv17g0002          | Tc03_g016040       | .                  | .         | .            | Gorai.             | . | . |
| 008G211400.1       | .                  | .                  | .         | .            | .                  | . | . |
| .                  | .                  | .                  | .         | .            | .                  | . | . |
| Vv17g0003          | .                  | .                  | .         | .            | Gorai.008G211300.1 | . | . |
| .                  | .                  | .                  | .         | .            | .                  | . | . |
| Vv17g0004          | .                  | .                  | .         | .            | .                  | . | . |

|                    |              |                    |   |                    |        |   |   |
|--------------------|--------------|--------------------|---|--------------------|--------|---|---|
| .                  | .            | .                  | . | .                  | .      | . | . |
| .                  | .            | .                  | . | .                  | .      | . | . |
| Vv17g0005          | .            | Gorai.001G053500.1 | . | .                  | .      | . | . |
| .                  | .            | .                  | . | .                  | .      | . | . |
| .                  | .            | .                  | . | .                  | .      | . | . |
| Vv17g0006          | Tc03_g019260 | .                  | . | .                  | .      | . | . |
| .                  | .            | .                  | . | .                  | .      | . | . |
| .                  | .            | .                  | . | .                  | .      | . | . |
| Vv17g0007          | .            | .                  | . | .                  | .      | . | . |
| .                  | .            | .                  | . | .                  | .      | . | . |
| .                  | .            | .                  | . | .                  | .      | . | . |
| Vv17g0008          | Tc03_g018890 | .                  | . | .                  | .      | . | . |
| Gorai.006G196400.1 | .            | .                  | . | .                  | .      | . | . |
| .                  | .            | .                  | . | .                  | .      | . | . |
| Vv17g0009          | Tc03_g016000 | .                  | . | Gorai.007G045200.1 | .      | . | . |
| .                  | .            | .                  | . | .                  | .      | . | . |
| .                  | .            | .                  | . | .                  | .      | . | . |
| Vv17g0010          | Tc03_g015990 | .                  | . | .                  | Gorai. | . | . |
| 008G211100.1       | .            | .                  | . | .                  | .      | . | . |
| .                  | .            | .                  | . | .                  | .      | . | . |
| Vv17g0011          | Tc03_g015980 | .                  | . | .                  | Gorai. | . | . |
| 008G156000.1       | .            | Vv01g1280          | . | .                  | .      | . | . |
| Gorai.008G156000.1 | .            | .                  | . | .                  | .      | . | . |
| .                  | .            | .                  | . | .                  | .      | . | . |
| Vv17g0012          | Tc03_g015970 | Gorai.001G053800.1 | . | .                  | .      | . | . |
| .                  | .            | Vv01g1278          | . | .                  | .      | . | . |
| .                  | .            | .                  | . | .                  | .      | . | . |
| .                  | .            | .                  | . | .                  | .      | . | . |
| Vv17g0013          | .            | .                  | . | .                  | .      | . | . |
| .                  | .            | .                  | . | .                  | .      | . | . |
| .                  | .            | .                  | . | .                  | .      | . | . |
| Vv17g0014          | .            | .                  | . | .                  | .      | . | . |
| .                  | .            | .                  | . | .                  | .      | . | . |
| .                  | .            | .                  | . | .                  | .      | . | . |
| Vv17g0015          | Tc03_g015960 | .                  | . | .                  | .      | . | . |
| .                  | .            | .                  | . | .                  | .      | . | . |
| .                  | .            | .                  | . | .                  | .      | . | . |
| Vv17g0016          | Tc03_g015950 | Gorai.001G053900.1 | . | .                  | .      | . | . |
| .                  | .            | .                  | . | .                  | .      | . | . |
| .                  | .            | .                  | . | .                  | .      | . | . |
| Vv17g0017          | Tc03_g015940 | .                  | . | .                  | .      | . | . |
| Vv01g1276          | .            | .                  | . | .                  | .      | . | . |
| Gorai.012G125800.1 | .            | .                  | . | .                  | .      | . | . |
| .                  | .            | .                  | . | .                  | .      | . | . |
| Vv17g0018          | Tc03_g015920 | .                  | . | .                  | Gorai. | . | . |
| 008G210800.1       | .            | .                  | . | .                  | .      | . | . |
| .                  | .            | .                  | . | .                  | .      | . | . |
| Vv17g0019          | .            | .                  | . | .                  | .      | . | . |
| .                  | .            | .                  | . | .                  | .      | . | . |
| .                  | .            | .                  | . | .                  | .      | . | . |

|                    |                    |                    |   |                    |        |
|--------------------|--------------------|--------------------|---|--------------------|--------|
| Vv17g0020          | Tc03_g015910       | .                  | . | .                  | Gorai. |
| 008G210700.1       | .                  | .                  | . | .                  | .      |
| .                  | .                  | .                  | . | .                  | .      |
| Vv17g0021          | .                  | .                  | . | .                  | .      |
| .                  | .                  | .                  | . | .                  | .      |
| .                  | .                  | .                  | . | .                  | .      |
| Vv17g0022          | Tc03_g015870       | .                  | . | Gorai.007G045000.1 | .      |
| .                  | Gorai.006G273100.1 | .                  | . | .                  | .      |
| .                  | .                  | .                  | . | .                  | .      |
| .                  | .                  | .                  | . | .                  | .      |
| Vv17g0023          | Tc03_g015850       | Gorai.001G054100.1 | . | .                  | .      |
| .                  | .                  | .                  | . | .                  | .      |
| .                  | .                  | .                  | . | .                  | .      |
| Vv17g0024          | Tc03_g015830       | Gorai.001G054200.1 | . | .                  | .      |
| Gorai.008G210400.1 | .                  | .                  | . | .                  | .      |
| .                  | .                  | .                  | . | .                  | .      |
| .                  | .                  | .                  | . | .                  | .      |
| Vv17g0025          | Tc03_g015820       | Gorai.001G054300.1 | . | .                  | .      |
| .                  | .                  | .                  | . | .                  | .      |
| .                  | .                  | .                  | . | .                  | .      |
| Vv17g0026          | Tc03_g015810       | .                  | . | .                  | .      |
| Vv01g1264          | .                  | .                  | . | .                  | .      |
| .                  | .                  | .                  | . | .                  | .      |
| Vv17g0027          | Tc03_g015800       | Gorai.001G054400.1 | . | .                  | .      |
| .                  | .                  | .                  | . | .                  | .      |
| .                  | .                  | .                  | . | .                  | .      |
| Vv17g0028          | Tc03_g015790       | .                  | . | .                  | .      |
| Vv14g1061          | Tc04_g005180       | .                  | . | .                  | .      |
| .                  | .                  | .                  | . | .                  | .      |
| Vv17g0029          | Tc03_g015780       | .                  | . | .                  | .      |
| Vv14g1062          | .                  | .                  | . | .                  | .      |
| .                  | .                  | .                  | . | .                  | .      |
| Vv17g0030          | Tc03_g015770       | Gorai.001G054500.1 | . | .                  | .      |
| .                  | .                  | .                  | . | .                  | .      |
| .                  | .                  | .                  | . | .                  | .      |
| Vv17g0031          | .                  | .                  | . | .                  | .      |
| .                  | .                  | .                  | . | .                  | .      |
| .                  | .                  | .                  | . | .                  | .      |
| Vv17g0032          | Tc03_g015740       | .                  | . | .                  | .      |
| .                  | .                  | .                  | . | .                  | .      |
| .                  | .                  | .                  | . | .                  | .      |
| Vv17g0033          | Tc03_g015720       | Gorai.001G054600.1 | . | .                  | .      |
| Gorai.007G044900.1 | .                  | .                  | . | .                  | .      |
| .                  | .                  | Vv01g1257          | . | .                  | .      |
| .                  | .                  | .                  | . | .                  | .      |
| Vv17g0034          | Tc03_g015710       | .                  | . | .                  | .      |
| .                  | .                  | .                  | . | .                  | .      |
| .                  | .                  | .                  | . | .                  | .      |
| Vv17g0035          | Tc03_g015700       | Gorai.001G054700.1 | . | .                  | .      |
| .                  | .                  | .                  | . | .                  | .      |

|                    |                    |                    |              |                    |                    |        |   |
|--------------------|--------------------|--------------------|--------------|--------------------|--------------------|--------|---|
| Vv17g0036          | .                  | .                  | .            | .                  | .                  | Gorai. | . |
| 006G273600.1       | Vv14g1073          | Tc04_g005070       | .            | .                  | .                  | .      | . |
| .                  | .                  | .                  | .            | .                  | .                  | .      | . |
| Vv17g0037          | Tc03_g015690       | .                  | .            | .                  | .                  | .      | . |
| Gorai.006G273300.1 | .                  | .                  | .            | .                  | .                  | .      | . |
| Vv17g0038          | Tc03_g015680       | .                  | .            | .                  | Gorai.007G044700.1 | .      | . |
| .                  | Vv01g1251          | Tc02_g019750       | .            | .                  | Gorai.             | .      | . |
| 005G196500.1       | .                  | .                  | .            | .                  | .                  | .      | . |
| Vv17g0039          | Tc03_g015670       | .                  | .            | .                  | Gorai.007G044600.1 | .      | . |
| Gorai.008G210100.1 | .                  | .                  | .            | .                  | .                  | .      | . |
| .                  | .                  | Vv01g1249          | Tc02_g019760 | .                  | .                  | .      | . |
| .                  | Gorai.008G210100.1 | .                  | .            | .                  | .                  | .      | . |
| Vv17g0040          | .                  | .                  | .            | .                  | .                  | .      | . |
| .                  | .                  | .                  | .            | .                  | .                  | .      | . |
| Vv17g0041          | Tc03_g015650       | Gorai.001G054800.1 | .            | .                  | .                  | .      | . |
| .                  | .                  | .                  | .            | .                  | .                  | .      | . |
| Vv17g0042          | .                  | .                  | .            | .                  | .                  | .      | . |
| .                  | .                  | .                  | .            | .                  | .                  | .      | . |
| Vv17g0043          | Tc03_g015620       | Gorai.001G054900.1 | .            | .                  | .                  | .      | . |
| Gorai.007G044400.1 | .                  | .                  | .            | .                  | .                  | .      | . |
| .                  | .                  | .                  | .            | .                  | .                  | .      | . |
| Vv17g0044          | .                  | .                  | .            | .                  | .                  | .      | . |
| .                  | .                  | .                  | .            | .                  | .                  | .      | . |
| Vv17g0045          | .                  | .                  | .            | .                  | .                  | .      | . |
| Vv14g1080          | Tc04_g004980       | .                  | .            | Gorai.007G072500.1 | .                  | .      | . |
| .                  | Gorai.012G082900.1 | .                  | .            | .                  | .                  | .      | . |
| Vv17g0046          | Tc03_g015610       | .                  | .            | .                  | Gorai.             | .      | . |
| 008G209800.1       | .                  | .                  | .            | .                  | .                  | .      | . |
| Vv17g0047          | Tc03_g015600       | Gorai.001G055000.1 | .            | .                  | .                  | .      | . |
| Gorai.007G044300.1 | Gorai.008G209700.1 | Gorai.006G272900.1 | .            | .                  | .                  | .      | . |
| Vv01g1242          | .                  | .                  | .            | Gorai.008G209700.1 | .                  | .      | . |
| .                  | .                  | .                  | .            | .                  | .                  | .      | . |
| Vv17g0048          | Tc03_g015590       | .                  | .            | Gorai.             | .                  | .      | . |
| 008G209600.1       | Vv14g1082          | Tc04_g004880       | .            | .                  | .                  | .      | . |
| .                  | .                  | .                  | .            | .                  | .                  | .      | . |
| Vv17g0049          | .                  | .                  | .            | .                  | .                  | .      | . |
| .                  | .                  | .                  | .            | .                  | .                  | .      | . |

|                    |                    |                    |                    |   |
|--------------------|--------------------|--------------------|--------------------|---|
| Vv17g0050          | Tc03_g015570       | Gorai.001G055200.1 | .                  | . |
| .                  | Gorai.006G272800.1 | .                  | .                  | . |
| .                  | .                  | Vv01g1226          | .                  | . |
| Vv17g0051          | Tc03_g015560       | .                  | .                  | . |
| Gorai.006G272700.1 | Vv14g1091          | Tc04_g004770       | .                  | . |
| Gorai.007G044200.1 | Gorai.006G000900.1 | .                  | .                  | . |
| Vv17g0052          | Tc03_g015550       | .                  | .                  | . |
| Vv14g1099          | Tc04_g004720       | .                  | .                  | . |
| Gorai.012G083300.1 | .                  | .                  | .                  | . |
| Vv17g0053          | .                  | .                  | .                  | . |
| .                  | .                  | .                  | .                  | . |
| Vv17g0054          | Tc03_g015540       | .                  | Gorai.007G044100.1 | . |
| Gorai.008G209500.1 | .                  | .                  | .                  | . |
| .                  | .                  | .                  | .                  | . |
| Vv17g0055          | Tc03_g015530       | Gorai.001G055300.1 | .                  | . |
| .                  | Gorai.006G272600.1 | .                  | .                  | . |
| .                  | .                  | .                  | .                  | . |
| Vv17g0056          | .                  | .                  | .                  | . |
| .                  | .                  | .                  | .                  | . |
| Vv17g0057          | .                  | .                  | .                  | . |
| .                  | .                  | .                  | .                  | . |
| Vv17g0058          | .                  | .                  | .                  | . |
| .                  | .                  | .                  | .                  | . |
| Vv17g0059          | .                  | .                  | .                  | . |
| .                  | .                  | .                  | .                  | . |
| Vv17g0060          | Tc03_g015520       | .                  | Gorai.             | . |
| 008G156700.1       | .                  | .                  | .                  | . |
| .                  | Vv01g1220          | .                  | Gorai.005G195600.1 | . |
| .                  | Gorai.008G156700.1 | .                  | .                  | . |
| Vv17g0061          | .                  | .                  | .                  | . |
| .                  | .                  | .                  | .                  | . |
| Vv17g0062          | .                  | .                  | .                  | . |
| .                  | .                  | .                  | .                  | . |
| Vv17g0063          | .                  | .                  | .                  | . |
| .                  | .                  | .                  | .                  | . |
| Vv17g0064          | .                  | .                  | .                  | . |



|                    |                    |                    |        |              |                    |   |   |
|--------------------|--------------------|--------------------|--------|--------------|--------------------|---|---|
| .                  | .                  | .                  | .      | .            | .                  | . | . |
| .                  | .                  | .                  | .      | .            | .                  | . | . |
| Vv17g0065          | .                  | .                  | .      | .            | .                  | . | . |
| .                  | .                  | .                  | .      | .            | .                  | . | . |
| .                  | .                  | .                  | .      | .            | .                  | . | . |
| Vv17g0066          | Tc03_g015510       | .                  | .      | .            | Gorai.007G044000.1 | . | . |
| .                  | .                  | .                  | .      | .            | .                  | . | . |
| .                  | .                  | .                  | .      | .            | .                  | . | . |
| Vv17g0067          | .                  | .                  | .      | .            | .                  | . | . |
| .                  | .                  | .                  | .      | .            | .                  | . | . |
| .                  | .                  | .                  | .      | .            | .                  | . | . |
| Vv17g0068          | .                  | .                  | .      | .            | .                  | . | . |
| .                  | .                  | .                  | .      | .            | .                  | . | . |
| .                  | .                  | .                  | .      | .            | .                  | . | . |
| Vv17g0069          | Tc03_g015490       | .                  | .      | .            | Gorai.007G043900.1 | . | . |
| .                  | .                  | .                  | .      | .            | .                  | . | . |
| .                  | .                  | .                  | .      | .            | .                  | . | . |
| Vv17g0070          | Tc03_g015480       | .                  | .      | .            | Gorai.             | . | . |
| 008G209300.1       | Vv14g1104          | .                  | .      | .            | .                  | . | . |
| .                  | .                  | .                  | .      | .            | .                  | . | . |
| .                  | .                  | .                  | .      | .            | .                  | . | . |
| Vv17g0071          | Tc03_g015470       | .                  | .      | .            | Gorai.             | . | . |
| 008G209200.1       | Vv14g1106          | .                  | .      | Tc04_g004610 | .                  | . | . |
| .                  | Gorai.006G044900.1 | .                  | .      | .            | .                  | . | . |
| .                  | .                  | .                  | .      | .            | .                  | . | . |
| Vv17g0072          | Tc03_g015460       | Gorai.001G055500.1 | .      | .            | .                  | . | . |
| .                  | Gorai.008G209100.1 | .                  | .      | .            | .                  | . | . |
| .                  | .                  | Vv01g1214          | .      | .            | .                  | . | . |
| Gorai.005G195100.1 | .                  | Gorai.008G209000.1 | Gorai. | .            | .                  | . | . |
| 012G124700.1       | .                  | .                  | .      | .            | .                  | . | . |
| Vv17g0073          | Tc03_g015450       | Gorai.001G055600.1 | .      | .            | .                  | . | . |
| .                  | Gorai.008G209000.1 | .                  | .      | .            | .                  | . | . |
| .                  | .                  | .                  | .      | .            | .                  | . | . |
| .                  | .                  | .                  | .      | .            | .                  | . | . |
| Vv17g0074          | .                  | .                  | .      | .            | .                  | . | . |
| Vv14g1108          | Tc04_g004580       | .                  | .      | .            | Gorai.             | . | . |
| 006G044700.1       | .                  | .                  | .      | .            | .                  | . | . |
| .                  | .                  | .                  | .      | .            | .                  | . | . |
| Vv17g0075          | .                  | .                  | .      | .            | .                  | . | . |
| Vv14g1109          | Tc04_g004560       | .                  | .      | .            | Gorai.             | . | . |
| 006G044500.1       | Gorai.012G083900.1 | .                  | .      | .            | .                  | . | . |
| .                  | .                  | .                  | .      | .            | .                  | . | . |
| Vv17g0076          | Tc03_g015430       | .                  | .      | .            | .                  | . | . |
| .                  | .                  | .                  | .      | .            | .                  | . | . |
| .                  | .                  | .                  | .      | .            | .                  | . | . |
| Vv17g0077          | Tc03_g015420       | .                  | .      | .            | Gorai.             | . | . |
| 008G208900.1       | .                  | .                  | .      | .            | .                  | . | . |
| .                  | .                  | .                  | .      | .            | .                  | . | . |
| Vv17g0078          | Tc03_g015400       | Gorai.001G055800.1 | .      | .            | .                  | . | . |
| .                  | .                  | .                  | .      | .            | .                  | . | . |



|                    |                    |                    |        |           |                    |   |   |
|--------------------|--------------------|--------------------|--------|-----------|--------------------|---|---|
| Vv17g0094          | .                  | .                  | .      | .         | .                  | . | . |
| .                  | .                  | .                  | .      | .         | .                  | . | . |
| Vv17g0095          | .                  | .                  | .      | .         | Gorai.008G157700.1 | . | . |
| .                  | .                  | .                  | .      | .         | .                  | . | . |
| Vv17g0096          | Tc03_g015170       | .                  | .      | .         | .                  | . | . |
| .                  | .                  | .                  | .      | .         | .                  | . | . |
| Vv17g0097          | Tc03_g015160       | Gorai.001G057100.1 | .      | .         | .                  | . | . |
| .                  | Gorai.008G207300.1 | Gorai.006G272200.1 | .      | .         | .                  | . | . |
| .                  | .                  | .                  | .      | Vv01g1193 | .                  | . | . |
| Vv17g0098          | Tc03_g015150       | Gorai.001G057500.1 | .      | .         | .                  | . | . |
| .                  | .                  | .                  | .      | .         | .                  | . | . |
| Vv17g0099          | .                  | .                  | .      | .         | .                  | . | . |
| .                  | .                  | .                  | .      | .         | .                  | . | . |
| Vv17g0100          | .                  | .                  | .      | .         | .                  | . | . |
| .                  | .                  | .                  | .      | .         | .                  | . | . |
| Vv17g0101          | .                  | .                  | .      | .         | .                  | . | . |
| .                  | .                  | .                  | .      | .         | .                  | . | . |
| Vv17g0102          | .                  | .                  | .      | .         | .                  | . | . |
| .                  | .                  | .                  | .      | .         | .                  | . | . |
| Vv17g0103          | .                  | .                  | .      | .         | .                  | . | . |
| .                  | .                  | .                  | .      | .         | .                  | . | . |
| Vv17g0104          | .                  | .                  | .      | .         | .                  | . | . |
| .                  | .                  | .                  | .      | .         | .                  | . | . |
| Vv17g0105          | .                  | .                  | .      | .         | .                  | . | . |
| .                  | .                  | .                  | .      | .         | .                  | . | . |
| Vv17g0106          | .                  | .                  | .      | .         | .                  | . | . |
| .                  | .                  | .                  | .      | .         | .                  | . | . |
| Vv17g0107          | Tc03_g015050       | Gorai.001G057900.1 | .      | .         | .                  | . | . |
| .                  | Vv14g1137          | Tc04_g004290       | .      | .         | .                  | . | . |
| Gorai.001G272800.1 | Gorai.007G043300.1 | .                  | Gorai. | .         | .                  | . | . |
| 012G086000.1       | .                  | .                  | .      | .         | .                  | . | . |
| Vv17g0108          | Tc03_g012600       | .                  | .      | .         | .                  | . | . |
| .                  | .                  | .                  | .      | .         | .                  | . | . |
| Vv01g1157          | .                  | .                  | .      | .         | .                  | . | . |
| Vv17g0109          | .                  | .                  | .      | .         | .                  | . | . |
| .                  | .                  | .                  | .      | .         | .                  | . | . |

|                    |                    |                    |   |   |                    |        |   |
|--------------------|--------------------|--------------------|---|---|--------------------|--------|---|
| Vv17g0110          | .                  | .                  | . | . | .                  | .      | . |
| .                  | .                  | .                  | . | . | .                  | .      | . |
| Vv17g0111          | Tc03_g012570       | .                  | . | . | .                  | .      | . |
| .                  | .                  | .                  | . | . | .                  | .      | . |
| Vv17g0112          | .                  | .                  | . | . | Gorai.008G207100.1 | .      | . |
| .                  | .                  | .                  | . | . | .                  | .      | . |
| Vv17g0113          | .                  | .                  | . | . | .                  | .      | . |
| .                  | .                  | .                  | . | . | .                  | .      | . |
| Vv17g0114          | Tc03_g012560       | .                  | . | . | .                  | .      | . |
| .                  | .                  | .                  | . | . | .                  | .      | . |
| Vv17g0115          | .                  | .                  | . | . | .                  | .      | . |
| .                  | .                  | .                  | . | . | .                  | .      | . |
| Vv17g0116          | .                  | .                  | . | . | .                  | .      | . |
| Vv14g1152          | Tc05_g002060       | .                  | . | . | .                  | .      | . |
| .                  | .                  | .                  | . | . | .                  | .      | . |
| Vv17g0117          | Tc03_g014940       | .                  | . | . | .                  | Gorai. | . |
| 008G206500.1       | .                  | .                  | . | . | .                  | .      | . |
| .                  | .                  | .                  | . | . | .                  | .      | . |
| Vv17g0118          | .                  | .                  | . | . | .                  | .      | . |
| .                  | .                  | .                  | . | . | .                  | .      | . |
| Vv17g0119          | Tc03_g014910       | Gorai.001G058900.1 | . | . | .                  | .      | . |
| .                  | Gorai.006G272000.1 | .                  | . | . | .                  | .      | . |
| .                  | .                  | .                  | . | . | .                  | .      | . |
| Vv17g0120          | Tc03_g014890       | .                  | . | . | .                  | Gorai. | . |
| 008G206400.1       | .                  | .                  | . | . | .                  | .      | . |
| .                  | .                  | .                  | . | . | .                  | .      | . |
| Vv17g0121          | Tc03_g014880       | Gorai.001G059000.1 | . | . | .                  | .      | . |
| Gorai.008G206300.1 | .                  | .                  | . | . | .                  | .      | . |
| .                  | .                  | .                  | . | . | .                  | .      | . |
| Vv17g0122          | Tc03_g014860       | .                  | . | . | .                  | .      | . |
| .                  | .                  | .                  | . | . | .                  | .      | . |
| Vv17g0123          | Tc03_g014850       | .                  | . | . | .                  | Gorai. | . |
| 008G206100.1       | Gorai.006G271900.1 | .                  | . | . | .                  | .      | . |
| .                  | .                  | .                  | . | . | .                  | .      | . |
| Vv17g0124          | Tc03_g014840       | .                  | . | . | .                  | .      | . |
| .                  | .                  | .                  | . | . | .                  | .      | . |
| Vv17g0125          | Tc03_g014820       | .                  | . | . | .                  | Gorai. | . |

|                    |                    |                    |   |   |   |                    |   |
|--------------------|--------------------|--------------------|---|---|---|--------------------|---|
| 008G206000.1       | .                  | .                  | . | . | . | .                  | . |
| .                  | .                  | .                  | . | . | . | .                  | . |
| Vv17g0126          | Tc03_g014810       | .                  | . | . | . | Gorai.             | . |
| 008G205900.1       | .                  | .                  | . | . | . | .                  | . |
| .                  | .                  | .                  | . | . | . | .                  | . |
| Vv17g0127          | .                  | .                  | . | . | . | .                  | . |
| .                  | .                  | .                  | . | . | . | .                  | . |
| .                  | .                  | .                  | . | . | . | .                  | . |
| Vv17g0128          | Tc03_g014790       | .                  | . | . | . | Gorai.             | . |
| 008G205800.1       | .                  | .                  | . | . | . | .                  | . |
| .                  | .                  | .                  | . | . | . | .                  | . |
| Vv17g0129          | Tc03_g014780       | Gorai.001G059200.1 | . | . | . | .                  | . |
| Gorai.007G042700.1 | .                  | .                  | . | . | . | .                  | . |
| .                  | .                  | .                  | . | . | . | .                  | . |
| .                  | .                  | .                  | . | . | . | .                  | . |
| Vv17g0130          | .                  | .                  | . | . | . | Gorai.008G205700.1 | . |
| .                  | .                  | .                  | . | . | . | .                  | . |
| .                  | .                  | .                  | . | . | . | .                  | . |
| Vv17g0131          | Tc03_g014760       | .                  | . | . | . | Gorai.007G042600.1 | . |
| .                  | Gorai.006G271700.1 | .                  | . | . | . | .                  | . |
| .                  | .                  | .                  | . | . | . | .                  | . |
| .                  | .                  | .                  | . | . | . | .                  | . |
| Vv17g0132          | Tc03_g014750       | .                  | . | . | . | Gorai.007G042500.1 | . |
| .                  | .                  | .                  | . | . | . | .                  | . |
| .                  | .                  | .                  | . | . | . | .                  | . |
| Vv17g0133          | Tc03_g014740       | .                  | . | . | . | Gorai.             | . |
| 008G205600.1       | .                  | Vv14g1171          | . | . | . | Gorai.011G084300.1 | . |
| .                  | Gorai.001G270700.1 | .                  | . | . | . | Gorai.006G041400.1 | . |
| .                  | .                  | .                  | . | . | . | .                  | . |
| Vv17g0134          | Tc03_g014730       | .                  | . | . | . | .                  | . |
| Gorai.006G271600.1 | .                  | .                  | . | . | . | .                  | . |
| .                  | .                  | .                  | . | . | . | .                  | . |
| .                  | .                  | .                  | . | . | . | .                  | . |
| Vv17g0135          | Tc03_g014720       | .                  | . | . | . | .                  | . |
| .                  | .                  | .                  | . | . | . | .                  | . |
| .                  | .                  | .                  | . | . | . | .                  | . |
| Vv17g0136          | Tc03_g014710       | .                  | . | . | . | Gorai.             | . |
| 008G205500.1       | .                  | .                  | . | . | . | .                  | . |
| .                  | .                  | .                  | . | . | . | .                  | . |
| Vv17g0137          | .                  | .                  | . | . | . | .                  | . |
| .                  | .                  | .                  | . | . | . | .                  | . |
| .                  | .                  | .                  | . | . | . | .                  | . |
| Vv17g0138          | Tc03_g014690       | Gorai.001G059400.1 | . | . | . | .                  | . |
| .                  | Gorai.008G205400.1 | .                  | . | . | . | .                  | . |
| .                  | .                  | .                  | . | . | . | .                  | . |
| .                  | .                  | .                  | . | . | . | .                  | . |
| Vv17g0139          | .                  | .                  | . | . | . | .                  | . |
| .                  | .                  | .                  | . | . | . | .                  | . |
| .                  | .                  | .                  | . | . | . | .                  | . |
| Vv17g0140          | .                  | .                  | . | . | . | .                  | . |
| .                  | .                  | .                  | . | . | . | .                  | . |

|                    |                    |                    |   |   |   |
|--------------------|--------------------|--------------------|---|---|---|
| Vv17g0141          | Tc03_g014680       | .                  | . | . | . |
| Vv14g1198          | .                  | .                  | . | . | . |
| Vv17g0142          | .                  | .                  | . | . | . |
| .                  | .                  | .                  | . | . | . |
| Vv17g0143          | .                  | .                  | . | . | . |
| .                  | .                  | .                  | . | . | . |
| Vv17g0144          | .                  | .                  | . | . | . |
| Vv14g1199          | Gorai.011G091700.1 | Gorai.001G270100.1 | . | . | . |
| .                  | Gorai.006G041100.1 | .                  | . | . | . |
| Vv17g0145          | Tc03_g014670       | Gorai.001G059500.1 | . | . | . |
| Gorai.007G042400.1 | .                  | .                  | . | . | . |
| .                  | .                  | .                  | . | . | . |
| Vv17g0146          | Tc03_g014660       | Gorai.001G059600.1 | . | . | . |
| .                  | .                  | .                  | . | . | . |
| Vv17g0147          | .                  | .                  | . | . | . |
| .                  | .                  | .                  | . | . | . |
| Vv17g0148          | Tc03_g014650       | Gorai.001G059700.1 | . | . | . |
| .                  | .                  | .                  | . | . | . |
| Vv17g0149          | Tc03_g014640       | .                  | . | . | . |
| .                  | .                  | .                  | . | . | . |
| Vv17g0150          | .                  | .                  | . | . | . |
| Vv14g1207          | Tc04_g002990       | Gorai.001G269400.1 | . | . | . |
| .                  | Gorai.012G088300.1 | .                  | . | . | . |
| Vv17g0151          | Tc03_g014630       | Gorai.001G059900.1 | . | . | . |
| .                  | .                  | .                  | . | . | . |
| Vv17g0152          | .                  | .                  | . | . | . |
| .                  | .                  | .                  | . | . | . |
| Vv17g0153          | Tc03_g014610       | Gorai.001G060100.1 | . | . | . |
| Gorai.008G205300.1 | .                  | .                  | . | . | . |
| .                  | .                  | .                  | . | . | . |
| Vv17g0154          | Tc03_g014600       | Gorai.001G060200.1 | . | . | . |
| Gorai.007G042300.1 | .                  | .                  | . | . | . |
| .                  | .                  | .                  | . | . | . |
| Vv17g0155          | Tc03_g014590       | Gorai.001G060300.1 | . | . | . |
| Gorai.008G205200.1 | Gorai.006G271500.1 | .                  | . | . | . |

|              |                    |                    |   |   |   |                    |   |
|--------------|--------------------|--------------------|---|---|---|--------------------|---|
| .            | .                  | .                  | . | . | . | .                  | . |
| .            | .                  | .                  | . | . | . | .                  | . |
| Vv17g0156    | Tc03_g014580       | .                  | . | . | . | .                  | . |
| .            | .                  | .                  | . | . | . | .                  | . |
| .            | .                  | .                  | . | . | . | .                  | . |
| Vv17g0157    | .                  | .                  | . | . | . | .                  | . |
| .            | .                  | .                  | . | . | . | .                  | . |
| .            | .                  | .                  | . | . | . | .                  | . |
| Vv17g0158    | Tc03_g014570       | Gorai.001G060400.1 | . | . | . | .                  | . |
| .            | .                  | .                  | . | . | . | .                  | . |
| .            | .                  | .                  | . | . | . | .                  | . |
| Vv17g0159    | Tc03_g014530       | .                  | . | . | . | .                  | . |
| .            | .                  | .                  | . | . | . | .                  | . |
| .            | .                  | .                  | . | . | . | .                  | . |
| Vv17g0160    | .                  | .                  | . | . | . | .                  | . |
| .            | .                  | .                  | . | . | . | .                  | . |
| .            | .                  | .                  | . | . | . | .                  | . |
| Vv17g0161    | Tc03_g014520       | Gorai.001G060500.1 | . | . | . | .                  | . |
| .            | Gorai.006G271400.1 | .                  | . | . | . | .                  | . |
| .            | .                  | .                  | . | . | . | .                  | . |
| .            | .                  | .                  | . | . | . | .                  | . |
| Vv17g0162    | .                  | .                  | . | . | . | .                  | . |
| .            | .                  | .                  | . | . | . | .                  | . |
| .            | .                  | .                  | . | . | . | .                  | . |
| Vv17g0163    | Tc03_g014500       | Gorai.001G060700.1 | . | . | . | .                  | . |
| .            | Gorai.008G202600.1 | Gorai.006G271000.1 | . | . | . | Vv14g1222          | . |
| .            | .                  | .                  | . | . | . | .                  | . |
| .            | .                  | .                  | . | . | . | .                  | . |
| Vv17g0164    | Tc03_g014480       | .                  | . | . | . | .                  | . |
| .            | .                  | .                  | . | . | . | .                  | . |
| .            | .                  | .                  | . | . | . | .                  | . |
| Vv17g0165    | Tc03_g014470       | Gorai.001G060800.1 | . | . | . | .                  | . |
| .            | .                  | .                  | . | . | . | .                  | . |
| .            | .                  | .                  | . | . | . | .                  | . |
| Vv17g0166    | Tc03_g014460       | Gorai.001G060900.1 | . | . | . | .                  | . |
| .            | .                  | .                  | . | . | . | .                  | . |
| .            | .                  | .                  | . | . | . | .                  | . |
| Vv17g0167    | Tc03_g014450       | Gorai.001G061000.1 | . | . | . | .                  | . |
| .            | Gorai.006G268000.1 | Vv14g1227          | . | . | . | .                  | . |
| Tc04_g002810 | Gorai.011G092600.1 | .                  | . | . | . | Gorai.             | . |
| 006G039500.1 | .                  | .                  | . | . | . | .                  | . |
| .            | .                  | .                  | . | . | . | .                  | . |
| Vv17g0168    | Tc03_g014440       | .                  | . | . | . | .                  | . |
| .            | Vv14g1230          | Tc04_g002790       | . | . | . | Gorai.001G268800.1 | . |
| .            | Gorai.006G039400.1 | .                  | . | . | . | .                  | . |
| .            | .                  | .                  | . | . | . | .                  | . |
| .            | .                  | .                  | . | . | . | .                  | . |
| Vv17g0169    | .                  | .                  | . | . | . | .                  | . |
| .            | .                  | .                  | . | . | . | .                  | . |
| .            | .                  | .                  | . | . | . | .                  | . |
| Vv17g0170    | .                  | Gorai.001G061100.1 | . | . | . | .                  | . |

|                    |              |   |   |   |                    |        |   |
|--------------------|--------------|---|---|---|--------------------|--------|---|
| .                  | .            | . | . | . | .                  | .      | . |
| .                  | .            | . | . | . | .                  | .      | . |
| Vv17g0171          | .            | . | . | . | .                  | .      | . |
| .                  | .            | . | . | . | .                  | .      | . |
| Vv17g0172          | .            | . | . | . | Gorai.005G134600.1 | .      | . |
| Gorai.006G190500.1 | .            | . | . | . | .                  | .      | . |
| .                  | .            | . | . | . | .                  | .      | . |
| Vv17g0173          | Tc03_g008530 | . | . | . | .                  | .      | . |
| .                  | .            | . | . | . | .                  | .      | . |
| .                  | .            | . | . | . | .                  | .      | . |
| Vv17g0174          | .            | . | . | . | .                  | Gorai. | . |
| 006G191100.1       | .            | . | . | . | .                  | .      | . |
| .                  | .            | . | . | . | .                  | .      | . |
| Vv17g0175          | .            | . | . | . | .                  | .      | . |
| .                  | .            | . | . | . | .                  | .      | . |
| .                  | .            | . | . | . | .                  | .      | . |
| Vv17g0176          | .            | . | . | . | .                  | .      | . |
| .                  | .            | . | . | . | .                  | .      | . |
| .                  | .            | . | . | . | .                  | .      | . |
| Vv17g0177          | Tc03_g007940 | . | . | . | .                  | .      | . |
| Vv14g1038          | Tc04_g005480 | . | . | . | .                  | .      | . |
| Gorai.012G082500.1 | .            | . | . | . | .                  | .      | . |
| .                  | .            | . | . | . | .                  | .      | . |
| Vv17g0178          | .            | . | . | . | .                  | .      | . |
| .                  | .            | . | . | . | .                  | .      | . |
| .                  | .            | . | . | . | .                  | .      | . |
| Vv17g0179          | Tc03_g007920 | . | . | . | .                  | .      | . |
| Gorai.006G191200.1 | .            | . | . | . | .                  | .      | . |
| .                  | .            | . | . | . | .                  | .      | . |
| Vv17g0180          | .            | . | . | . | .                  | .      | . |
| .                  | .            | . | . | . | .                  | .      | . |
| .                  | .            | . | . | . | .                  | .      | . |
| Vv17g0181          | Tc03_g007870 | . | . | . | .                  | .      | . |
| .                  | .            | . | . | . | .                  | .      | . |
| .                  | .            | . | . | . | .                  | .      | . |
| Vv17g0182          | Tc03_g007830 | . | . | . | Gorai.005G133600.1 | .      | . |
| .                  | .            | . | . | . | .                  | .      | . |
| .                  | .            | . | . | . | .                  | .      | . |
| Vv17g0183          | .            | . | . | . | .                  | .      | . |
| .                  | .            | . | . | . | .                  | .      | . |
| .                  | .            | . | . | . | .                  | .      | . |
| Vv17g0184          | .            | . | . | . | .                  | .      | . |
| .                  | .            | . | . | . | .                  | .      | . |
| .                  | .            | . | . | . | .                  | .      | . |
| Vv17g0185          | .            | . | . | . | .                  | .      | . |
| .                  | .            | . | . | . | .                  | .      | . |
| .                  | .            | . | . | . | .                  | .      | . |
| Vv17g0186          | Tc03_g007760 | . | . | . | .                  | .      | . |



|              |              |           |                    |                    |                    |   |   |
|--------------|--------------|-----------|--------------------|--------------------|--------------------|---|---|
| .            | .            | .         | .                  | .                  | .                  | . | . |
| .            | .            | .         | .                  | .                  | .                  | . | . |
| Vv17g0187    | .            | .         | .                  | .                  | .                  | . | . |
| .            | .            | .         | .                  | .                  | .                  | . | . |
| Vv17g0188    | .            | .         | .                  | .                  | .                  | . | . |
| .            | .            | .         | .                  | .                  | .                  | . | . |
| Vv17g0189    | .            | .         | .                  | .                  | Gorai.005G133500.1 | . | . |
| .            | Vv14g1040    | .         | Tc04_g005460       | .                  | .                  | . | . |
| .            | .            | Vv01g0590 | Tc02_g027880       | Gorai.             | .                  | . | . |
| 002G172600.1 | .            | .         | Gorai.008G291200.1 | .                  | .                  | . | . |
| Vv17g0190    | .            | .         | .                  | .                  | .                  | . | . |
| .            | .            | .         | .                  | .                  | .                  | . | . |
| Vv17g0191    | .            | .         | .                  | .                  | .                  | . | . |
| .            | .            | .         | .                  | .                  | .                  | . | . |
| Vv17g0192    | .            | .         | .                  | .                  | .                  | . | . |
| .            | .            | .         | .                  | .                  | .                  | . | . |
| Vv17g0193    | .            | .         | .                  | .                  | .                  | . | . |
| .            | .            | .         | .                  | .                  | .                  | . | . |
| Vv17g0194    | .            | .         | .                  | .                  | .                  | . | . |
| .            | .            | .         | .                  | .                  | .                  | . | . |
| Vv17g0195    | .            | .         | .                  | .                  | .                  | . | . |
| .            | .            | .         | .                  | .                  | .                  | . | . |
| Vv17g0196    | .            | .         | .                  | .                  | .                  | . | . |
| .            | .            | .         | .                  | .                  | .                  | . | . |
| Vv17g0197    | .            | .         | .                  | .                  | .                  | . | . |
| .            | .            | .         | .                  | .                  | .                  | . | . |
| Vv17g0198    | Tc03_g007360 | .         | .                  | .                  | .                  | . | . |
| .            | .            | .         | .                  | .                  | .                  | . | . |
| Vv17g0199    | Tc03_g007300 | .         | .                  | .                  | .                  | . | . |
| .            | .            | .         | .                  | .                  | .                  | . | . |
| Vv17g0200    | .            | .         | .                  | Gorai.005G132400.1 | .                  | . | . |
| .            | .            | .         | .                  | .                  | .                  | . | . |
| Vv17g0201    | .            | .         | .                  | .                  | .                  | . | . |
| .            | .            | .         | .                  | .                  | .                  | . | . |
| Vv17g0202    | Tc03_g007130 | .         | .                  | .                  | .                  | . | . |
| .            | .            | .         | .                  | .                  | .                  | . | . |

|                    |                    |                    |   |                    |
|--------------------|--------------------|--------------------|---|--------------------|
| Vv17g0203          | Tc03_g007120       | .                  | . | Gorai.005G132200.1 |
| .                  | .                  | .                  | . | .                  |
| Vv17g0204          | .                  | .                  | . | Gorai.             |
| 006G191400.1       | .                  | .                  | . | .                  |
| Vv17g0205          | .                  | .                  | . | .                  |
| .                  | .                  | .                  | . | .                  |
| Vv17g0206          | .                  | .                  | . | .                  |
| .                  | .                  | .                  | . | .                  |
| Vv17g0207          | .                  | .                  | . | .                  |
| .                  | .                  | .                  | . | .                  |
| Vv17g0208          | .                  | .                  | . | .                  |
| .                  | .                  | .                  | . | .                  |
| Vv17g0209          | .                  | .                  | . | .                  |
| .                  | .                  | .                  | . | .                  |
| Vv17g0210          | .                  | .                  | . | .                  |
| .                  | .                  | .                  | . | .                  |
| Vv17g0211          | .                  | .                  | . | .                  |
| .                  | .                  | .                  | . | .                  |
| Vv17g0212          | .                  | .                  | . | .                  |
| .                  | .                  | .                  | . | .                  |
| Vv17g0213          | Tc03_g006820       | .                  | . | .                  |
| Vv01g0581          | Tc02_g028050       | Gorai.002G173700.1 | . | .                  |
| Gorai.009G330500.1 | Gorai.008G291000.1 | .                  | . | .                  |
| Vv17g0214          | .                  | .                  | . | .                  |
| .                  | .                  | .                  | . | .                  |
| Vv17g0215          | .                  | .                  | . | .                  |
| .                  | .                  | .                  | . | .                  |
| Vv17g0216          | .                  | .                  | . | .                  |
| .                  | .                  | .                  | . | .                  |
| Vv17g0217          | .                  | .                  | . | .                  |
| .                  | .                  | .                  | . | .                  |
| Vv17g0218          | .                  | .                  | . | .                  |
| .                  | .                  | .                  | . | .                  |
| .                  | .                  | .                  | . | .                  |

|              |              |   |   |   |   |        |   |
|--------------|--------------|---|---|---|---|--------|---|
| Vv17g0219    | .            | . | . | . | . | .      | . |
| .            | .            | . | . | . | . | .      | . |
| .            | .            | . | . | . | . | .      | . |
| Vv17g0220    | .            | . | . | . | . | Gorai. | . |
| 006G191700.1 | .            | . | . | . | . | .      | . |
| .            | .            | . | . | . | . | .      | . |
| Vv17g0221    | .            | . | . | . | . | .      | . |
| .            | .            | . | . | . | . | .      | . |
| .            | .            | . | . | . | . | .      | . |
| Vv17g0222    | .            | . | . | . | . | .      | . |
| .            | .            | . | . | . | . | .      | . |
| .            | .            | . | . | . | . | .      | . |
| Vv17g0223    | Tc03_g003450 | . | . | . | . | .      | . |
| .            | .            | . | . | . | . | .      | . |
| .            | .            | . | . | . | . | .      | . |
| Vv17g0224    | .            | . | . | . | . | .      | . |
| .            | .            | . | . | . | . | .      | . |
| .            | .            | . | . | . | . | .      | . |
| Vv17g0225    | .            | . | . | . | . | .      | . |
| .            | .            | . | . | . | . | .      | . |
| .            | .            | . | . | . | . | .      | . |
| Vv17g0226    | .            | . | . | . | . | .      | . |
| .            | .            | . | . | . | . | .      | . |
| .            | .            | . | . | . | . | .      | . |
| Vv17g0227    | .            | . | . | . | . | .      | . |
| .            | .            | . | . | . | . | .      | . |
| .            | .            | . | . | . | . | .      | . |
| Vv17g0228    | Tc03_g001650 | . | . | . | . | .      | . |
| .            | .            | . | . | . | . | .      | . |
| .            | .            | . | . | . | . | .      | . |
| Vv17g0229    | .            | . | . | . | . | .      | . |
| .            | .            | . | . | . | . | .      | . |
| .            | .            | . | . | . | . | .      | . |
| Vv17g0230    | .            | . | . | . | . | .      | . |
| .            | .            | . | . | . | . | .      | . |
| .            | .            | . | . | . | . | .      | . |
| Vv17g0231    | .            | . | . | . | . | .      | . |
| .            | .            | . | . | . | . | .      | . |
| .            | .            | . | . | . | . | .      | . |
| Vv17g0232    | .            | . | . | . | . | .      | . |
| .            | .            | . | . | . | . | .      | . |
| .            | .            | . | . | . | . | .      | . |
| Vv17g0233    | .            | . | . | . | . | .      | . |
| .            | .            | . | . | . | . | .      | . |
| .            | .            | . | . | . | . | .      | . |
| Vv17g0234    | .            | . | . | . | . | .      | . |
| .            | .            | . | . | . | . | .      | . |
| .            | .            | . | . | . | . | .      | . |
| Vv17g0235    | .            | . | . | . | . | .      | . |
| .            | .            | . | . | . | . | .      | . |

|                    |                    |                    |   |                    |                    |        |   |
|--------------------|--------------------|--------------------|---|--------------------|--------------------|--------|---|
| Vv17g0236          | .                  | .                  | . | .                  | .                  | .      | . |
| .                  | .                  | .                  | . | .                  | .                  | .      | . |
| Vv17g0237          | .                  | .                  | . | .                  | .                  | .      | . |
| .                  | .                  | .                  | . | .                  | .                  | .      | . |
| Vv17g0238          | Tc03_g006240       | .                  | . | .                  | .                  | .      | . |
| .                  | .                  | .                  | . | .                  | .                  | .      | . |
| Vv17g0239          | Tc03_g001500       | .                  | . | .                  | .                  | .      | . |
| .                  | .                  | .                  | . | .                  | .                  | .      | . |
| Vv17g0240          | .                  | .                  | . | .                  | .                  | Gorai. | . |
| 006G191800.1       | .                  | .                  | . | .                  | .                  | .      | . |
| .                  | .                  | .                  | . | .                  | .                  | .      | . |
| Vv17g0241          | .                  | .                  | . | .                  | .                  | .      | . |
| .                  | .                  | .                  | . | .                  | .                  | .      | . |
| Vv17g0242          | Tc03_g003550       | .                  | . | .                  | Gorai.005G132000.1 | .      | . |
| .                  | Vv01g0542          | .                  | . | .                  | .                  | .      | . |
| Gorai.008G289900.1 | .                  | .                  | . | .                  | .                  | .      | . |
| .                  | .                  | .                  | . | .                  | .                  | .      | . |
| Vv17g0243          | .                  | .                  | . | Gorai.005G131900.1 | .                  | .      | . |
| .                  | Vv01g0520          | .                  | . | .                  | .                  | .      | . |
| Vv17g0244          | Tc03_g005600       | .                  | . | Gorai.006G049000.1 | .                  | .      | . |
| .                  | Gorai.006G179900.1 | .                  | . | .                  | .                  | .      | . |
| .                  | .                  | .                  | . | .                  | .                  | .      | . |
| Vv17g0245          | .                  | .                  | . | .                  | .                  | .      | . |
| .                  | .                  | .                  | . | .                  | .                  | .      | . |
| Vv17g0246          | Tc03_g005580       | .                  | . | .                  | .                  | .      | . |
| .                  | Vv01g0516          | Tc02_g027160       | . | .                  | .                  | .      | . |
| Gorai.008G289800.1 | .                  | .                  | . | .                  | .                  | .      | . |
| .                  | .                  | .                  | . | .                  | .                  | .      | . |
| Vv17g0247          | .                  | .                  | . | .                  | .                  | .      | . |
| .                  | .                  | .                  | . | .                  | .                  | .      | . |
| Vv17g0248          | Tc03_g005540       | .                  | . | .                  | .                  | .      | . |
| .                  | .                  | .                  | . | .                  | .                  | .      | . |
| Vv17g0249          | Tc03_g005490       | Gorai.001G087100.1 | . | .                  | .                  | .      | . |
| Gorai.005G131800.1 | .                  | .                  | . | .                  | .                  | .      | . |
| .                  | .                  | .                  | . | .                  | .                  | .      | . |
| Vv17g0250          | .                  | .                  | . | .                  | .                  | .      | . |
| .                  | .                  | .                  | . | .                  | .                  | .      | . |
| .                  | .                  | .                  | . | .                  | .                  | .      | . |

|                    |                    |                    |                    |                    |                    |   |
|--------------------|--------------------|--------------------|--------------------|--------------------|--------------------|---|
| Vv17g0251          | Tc03_g005400       | .                  | .                  | .                  | .                  | . |
| .                  | .                  | .                  | .                  | .                  | .                  | . |
| .                  | .                  | .                  | .                  | .                  | .                  | . |
| Vv17g0252          | Tc03_g005380       | .                  | .                  | .                  | .                  | . |
| Gorai.006G192100.1 | .                  | .                  | .                  | .                  | .                  | . |
| .                  | .                  | .                  | .                  | .                  | .                  | . |
| Vv17g0253          | .                  | .                  | .                  | .                  | .                  | . |
| .                  | .                  | .                  | .                  | .                  | .                  | . |
| .                  | .                  | .                  | .                  | .                  | .                  | . |
| Vv17g0254          | Tc03_g005360       | .                  | .                  | .                  | Gorai.005G131600.1 | . |
| .                  | .                  | .                  | .                  | .                  | .                  | . |
| .                  | .                  | .                  | .                  | .                  | .                  | . |
| Vv17g0255          | Tc03_g005310       | .                  | .                  | .                  | .                  | . |
| .                  | .                  | .                  | .                  | .                  | .                  | . |
| .                  | .                  | .                  | .                  | .                  | .                  | . |
| Vv17g0256          | Tc03_g005300       | .                  | .                  | .                  | .                  | . |
| .                  | .                  | .                  | .                  | .                  | .                  | . |
| .                  | .                  | .                  | .                  | .                  | .                  | . |
| Vv17g0257          | Tc03_g005280       | .                  | .                  | .                  | .                  | . |
| .                  | .                  | .                  | .                  | .                  | .                  | . |
| .                  | .                  | .                  | .                  | .                  | .                  | . |
| Vv17g0258          | .                  | .                  | .                  | .                  | .                  | . |
| .                  | .                  | .                  | .                  | .                  | .                  | . |
| .                  | .                  | .                  | .                  | .                  | .                  | . |
| Vv17g0259          | Tc03_g005260       | .                  | .                  | .                  | .                  | . |
| .                  | .                  | .                  | .                  | .                  | .                  | . |
| .                  | .                  | .                  | .                  | .                  | .                  | . |
| Vv17g0260          | Tc03_g005250       | .                  | .                  | .                  | .                  | . |
| .                  | .                  | .                  | .                  | .                  | .                  | . |
| .                  | .                  | .                  | .                  | .                  | .                  | . |
| Vv17g0261          | .                  | .                  | .                  | .                  | .                  | . |
| .                  | .                  | .                  | .                  | .                  | .                  | . |
| .                  | .                  | .                  | .                  | .                  | .                  | . |
| Vv17g0262          | .                  | .                  | .                  | Gorai.005G128600.1 | .                  | . |
| .                  | .                  | .                  | .                  | .                  | .                  | . |
| .                  | .                  | .                  | .                  | .                  | .                  | . |
| Vv17g0263          | .                  | .                  | .                  | .                  | .                  | . |
| .                  | .                  | .                  | .                  | .                  | .                  | . |
| .                  | .                  | .                  | .                  | .                  | .                  | . |
| Vv17g0264          | .                  | .                  | .                  | .                  | Gorai.             | . |
| 006G192300.1       | .                  | .                  | .                  | .                  | .                  | . |
| .                  | .                  | .                  | .                  | .                  | .                  | . |
| .                  | .                  | .                  | .                  | .                  | .                  | . |
| Vv17g0265          | .                  | Gorai.001G086600.1 | .                  | .                  | .                  | . |
| .                  | Vv01g0480          | Tc02_g027530       | Gorai.002G180100.1 | .                  | .                  | . |
| .                  | Gorai.005G162500.1 | .                  | Gorai.008G166500.1 | .                  | .                  | . |
| .                  | .                  | .                  | .                  | .                  | .                  | . |
| Vv17g0266          | .                  | .                  | .                  | .                  | .                  | . |
| .                  | .                  | .                  | .                  | .                  | .                  | . |
| .                  | .                  | .                  | .                  | .                  | .                  | . |
| Vv17g0267          | .                  | .                  | .                  | .                  | .                  | . |

|                    |              |                    |                    |                    |                    |   |   |
|--------------------|--------------|--------------------|--------------------|--------------------|--------------------|---|---|
| .                  | .            | .                  | .                  | .                  | .                  | . | . |
| .                  | .            | .                  | .                  | .                  | .                  | . | . |
| Vv17g0268          | .            | .                  | .                  | .                  | .                  | . | . |
| .                  | .            | .                  | .                  | .                  | .                  | . | . |
| .                  | .            | .                  | .                  | .                  | .                  | . | . |
| Vv17g0269          | .            | Gorai.001G086300.1 | .                  | .                  | Gorai.006G057000.1 | . | . |
| .                  | .            | .                  | .                  | .                  | .                  | . | . |
| .                  | .            | .                  | .                  | .                  | .                  | . | . |
| .                  | .            | .                  | .                  | .                  | .                  | . | . |
| Vv17g0270          | Tc03_g004840 | .                  | .                  | Gorai.006G057100.1 | .                  | . | . |
| .                  | .            | .                  | .                  | .                  | .                  | . | . |
| .                  | .            | .                  | .                  | .                  | .                  | . | . |
| Vv17g0271          | .            | .                  | .                  | .                  | Gorai.             | . | . |
| 006G192500.1       | .            | .                  | .                  | .                  | .                  | . | . |
| .                  | .            | .                  | .                  | .                  | .                  | . | . |
| Vv17g0272          | Tc03_g001100 | .                  | .                  | .                  | Gorai.007G001800.1 | . | . |
| .                  | .            | .                  | .                  | .                  | .                  | . | . |
| .                  | .            | .                  | .                  | .                  | .                  | . | . |
| Vv17g0273          | .            | Gorai.001G069800.1 | .                  | .                  | .                  | . | . |
| Gorai.006G192600.1 | .            | .                  | .                  | .                  | .                  | . | . |
| .                  | .            | .                  | .                  | .                  | .                  | . | . |
| .                  | .            | .                  | .                  | .                  | .                  | . | . |
| Vv17g0274          | .            | .                  | Gorai.006G057200.1 | .                  | .                  | . | . |
| .                  | .            | .                  | .                  | .                  | .                  | . | . |
| .                  | .            | .                  | .                  | .                  | .                  | . | . |
| Vv17g0275          | .            | .                  | .                  | .                  | .                  | . | . |
| .                  | .            | .                  | .                  | .                  | .                  | . | . |
| .                  | .            | .                  | .                  | .                  | .                  | . | . |
| Vv17g0276          | .            | .                  | .                  | .                  | .                  | . | . |
| .                  | .            | .                  | .                  | .                  | .                  | . | . |
| .                  | .            | .                  | .                  | .                  | .                  | . | . |
| Vv17g0277          | .            | .                  | .                  | .                  | .                  | . | . |
| .                  | .            | .                  | .                  | .                  | .                  | . | . |
| .                  | .            | .                  | .                  | .                  | .                  | . | . |
| Vv17g0278          | .            | .                  | .                  | .                  | .                  | . | . |
| .                  | .            | .                  | .                  | .                  | .                  | . | . |
| .                  | .            | .                  | .                  | .                  | .                  | . | . |
| Vv17g0279          | .            | .                  | .                  | .                  | .                  | . | . |
| .                  | .            | .                  | .                  | .                  | .                  | . | . |
| .                  | .            | .                  | .                  | .                  | .                  | . | . |
| Vv17g0280          | .            | .                  | .                  | .                  | .                  | . | . |
| .                  | .            | .                  | .                  | .                  | .                  | . | . |
| .                  | .            | .                  | .                  | .                  | .                  | . | . |
| Vv17g0281          | .            | .                  | .                  | .                  | .                  | . | . |
| .                  | .            | .                  | .                  | .                  | .                  | . | . |
| .                  | .            | .                  | .                  | .                  | .                  | . | . |
| Vv17g0282          | .            | .                  | .                  | .                  | .                  | . | . |
| .                  | .            | .                  | .                  | .                  | .                  | . | . |
| .                  | .            | .                  | .                  | .                  | .                  | . | . |
| Vv17g0283          | .            | .                  | .                  | .                  | .                  | . | . |

|                    |              |                    |   |   |   |        |   |
|--------------------|--------------|--------------------|---|---|---|--------|---|
| .                  | .            | .                  | . | . | . | .      | . |
| .                  | .            | .                  | . | . | . | .      | . |
| Vv17g0284          | .            | .                  | . | . | . | .      | . |
| .                  | .            | .                  | . | . | . | .      | . |
| Vv17g0285          | .            | .                  | . | . | . | .      | . |
| .                  | .            | .                  | . | . | . | .      | . |
| Vv17g0286          | .            | .                  | . | . | . | .      | . |
| .                  | .            | .                  | . | . | . | .      | . |
| Vv17g0287          | .            | .                  | . | . | . | Gorai. | . |
| 006G193100.1       | .            | .                  | . | . | . | .      | . |
| .                  | .            | .                  | . | . | . | .      | . |
| Vv17g0288          | .            | Gorai.001G084500.1 | . | . | . | .      | . |
| .                  | .            | .                  | . | . | . | .      | . |
| Vv17g0289          | .            | .                  | . | . | . | .      | . |
| .                  | .            | .                  | . | . | . | .      | . |
| Vv17g0290          | .            | .                  | . | . | . | .      | . |
| .                  | .            | .                  | . | . | . | .      | . |
| Vv17g0291          | .            | .                  | . | . | . | .      | . |
| .                  | .            | .                  | . | . | . | .      | . |
| Vv17g0292          | .            | .                  | . | . | . | .      | . |
| Vv01g0449          | .            | .                  | . | . | . | Gorai. | . |
| 012G123700.1       | .            | .                  | . | . | . | .      | . |
| Vv17g0293          | Tc03_g004820 | .                  | . | . | . | .      | . |
| .                  | .            | .                  | . | . | . | .      | . |
| Vv17g0294          | Tc03_g004810 | .                  | . | . | . | .      | . |
| Gorai.006G178700.1 | .            | .                  | . | . | . | .      | . |
| .                  | .            | .                  | . | . | . | .      | . |
| Vv17g0295          | .            | .                  | . | . | . | Gorai. | . |
| 006G178600.1       | .            | .                  | . | . | . | .      | . |
| .                  | .            | .                  | . | . | . | .      | . |
| Vv17g0296          | .            | .                  | . | . | . | .      | . |
| .                  | .            | .                  | . | . | . | .      | . |
| Vv17g0297          | Tc03_g004780 | .                  | . | . | . | .      | . |
| Gorai.006G177800.1 | .            | .                  | . | . | . | .      | . |
| .                  | .            | .                  | . | . | . | .      | . |
| Vv17g0298          | .            | .                  | . | . | . | .      | . |
| .                  | .            | .                  | . | . | . | .      | . |
| Vv17g0299          | Tc03_g004770 | .                  | . | . | . | .      | . |
| Gorai.006G193300.1 | .            | .                  | . | . | . | .      | . |
| .                  | .            | .                  | . | . | . | .      | . |

|              |              |   |   |   |                    |   |
|--------------|--------------|---|---|---|--------------------|---|
| Vv17g0300    | Tc03_g004760 | . | . | . | .                  | . |
| Vv01g0446    | .            | . | . | . | .                  | . |
| Vv17g0301    | .            | . | . | . | .                  | . |
| Vv17g0302    | .            | . | . | . | .                  | . |
| Vv17g0303    | Tc03_g004730 | . | . | . | .                  | . |
| Vv01g0445    | Tc02_g024630 | . | . | . | Gorai.005G178900.1 | . |
| Vv17g0304    | .            | . | . | . | .                  | . |
| Vv17g0305    | Tc03_g004720 | . | . | . | .                  | . |
| Vv01g0443    | Tc02_g024580 | . | . | . | Gorai.005G179100.1 | . |
| Vv17g0306    | .            | . | . | . | Gorai.006G057500.1 | . |
| Vv17g0307    | .            | . | . | . | .                  | . |
| Vv01g0437    | Tc02_g017590 | . | . | . | .                  | . |
| Vv17g0308    | .            | . | . | . | .                  | . |
| Vv01g0436    | Tc02_g017610 | . | . | . | .                  | . |
| Vv17g0309    | .            | . | . | . | .                  | . |
| Vv17g0310    | .            | . | . | . | .                  | . |
| 006G193500.1 | .            | . | . | . | Gorai.             | . |
| Vv17g0311    | Tc03_g000690 | . | . | . | .                  | . |
| Vv17g0312    | .            | . | . | . | .                  | . |
| Vv17g0313    | .            | . | . | . | .                  | . |
| Vv17g0314    | .            | . | . | . | .                  | . |
| Vv17g0315    | .            | . | . | . | .                  | . |



|                    |              |                    |   |   |                    |           |   |
|--------------------|--------------|--------------------|---|---|--------------------|-----------|---|
| Vv17g0316          | .            | .                  | . | . | .                  | .         | . |
| .                  | .            | .                  | . | . | .                  | .         | . |
| .                  | .            | .                  | . | . | .                  | .         | . |
| Vv17g0317          | .            | .                  | . | . | .                  | .         | . |
| Vv01g0434          | .            | .                  | . | . | .                  | .         | . |
| .                  | .            | .                  | . | . | .                  | .         | . |
| Vv17g0318          | .            | .                  | . | . | .                  | Gorai.    | . |
| 006G193600.1       | Vv01g0433    | .                  | . | . | .                  | .         | . |
| .                  | .            | .                  | . | . | .                  | .         | . |
| Vv17g0319          | .            | .                  | . | . | .                  | .         | . |
| .                  | .            | .                  | . | . | .                  | .         | . |
| .                  | .            | .                  | . | . | .                  | .         | . |
| Vv17g0320          | .            | Gorai.001G068100.1 | . | . | Gorai.006G057900.1 | .         | . |
| .                  | .            | .                  | . | . | .                  | .         | . |
| .                  | .            | .                  | . | . | .                  | .         | . |
| Vv17g0321          | .            | .                  | . | . | .                  | .         | . |
| .                  | .            | .                  | . | . | .                  | .         | . |
| .                  | .            | .                  | . | . | .                  | .         | . |
| Vv17g0322          | .            | Gorai.001G084000.1 | . | . | .                  | .         | . |
| .                  | Vv14g0736    | Tc04_g013830       | . | . | .                  | .         | . |
| .                  | .            | Vv01g0422          | . | . | .                  | .         | . |
| .                  | .            | .                  | . | . | .                  | .         | . |
| Vv17g0323          | .            | Gorai.001G068000.1 | . | . | .                  | .         | . |
| .                  | .            | .                  | . | . | .                  | .         | . |
| .                  | Vv01g0418    | .                  | . | . | Gorai.009G348900.1 | .         | . |
| .                  | .            | .                  | . | . | .                  | .         | . |
| Vv17g0324          | .            | Gorai.001G067900.1 | . | . | .                  | .         | . |
| .                  | .            | .                  | . | . | .                  | .         | . |
| .                  | .            | .                  | . | . | .                  | .         | . |
| Vv17g0325          | .            | .                  | . | . | .                  | .         | . |
| .                  | .            | .                  | . | . | .                  | Vv01g0415 | . |
| .                  | .            | .                  | . | . | .                  | .         | . |
| .                  | .            | Gorai.009G348200.1 | . | . | .                  | .         | . |
| Gorai.012G124000.1 | .            | .                  | . | . | .                  | .         | . |
| Vv17g0326          | .            | Gorai.006G058300.1 | . | . | .                  | .         | . |
| .                  | .            | .                  | . | . | .                  | .         | . |
| .                  | .            | .                  | . | . | .                  | .         | . |
| Vv17g0327          | Tc03_g027480 | Gorai.001G067700.1 | . | . | Gorai.             | .         | . |
| 006G058500.1       | .            | .                  | . | . | .                  | .         | . |
| .                  | .            | .                  | . | . | .                  | .         | . |
| .                  | .            | .                  | . | . | .                  | .         | . |
| Vv17g0328          | Tc03_g015780 | .                  | . | . | .                  | .         | . |
| .                  | .            | .                  | . | . | .                  | .         | . |
| .                  | .            | .                  | . | . | .                  | .         | . |
| Vv17g0329          | .            | .                  | . | . | .                  | .         | . |
| .                  | .            | .                  | . | . | .                  | .         | . |
| .                  | .            | .                  | . | . | .                  | .         | . |
| Vv17g0330          | .            | Gorai.001G064700.1 | . | . | .                  | .         | . |
| .                  | .            | .                  | . | . | .                  | .         | . |
| .                  | .            | .                  | . | . | .                  | .         | . |

|                    |              |                    |                    |                    |   |           |   |
|--------------------|--------------|--------------------|--------------------|--------------------|---|-----------|---|
| Vv17g0331          | .            | .                  | .                  | .                  | . | .         | . |
| .                  | .            | .                  | .                  | .                  | . | .         | . |
| Vv17g0332          | Tc03_g004130 |                    | Gorai.001G067600.1 |                    | . | .         | . |
| .                  | .            | .                  | .                  | .                  | . | .         | . |
| Vv17g0333          | .            | Gorai.001G075400.1 |                    | Gorai.006G059000.1 | . | .         | . |
| .                  | .            | Vv01g0409          | Tc02_g009450       |                    | . | .         | . |
| .                  | .            | .                  | .                  | .                  | . | .         | . |
| Vv17g0334          | .            | Gorai.001G075300.1 |                    | .                  | . | .         | . |
| .                  | .            | .                  | .                  | .                  | . | .         | . |
| Vv17g0335          | .            | .                  | .                  | .                  | . | .         | . |
| .                  | .            | .                  | .                  | .                  | . | .         | . |
| Vv17g0336          | Tc03_g027470 |                    | .                  | .                  | . | .         | . |
| .                  | .            | .                  | .                  | .                  | . | .         | . |
| Vv17g0337          | .            | .                  | .                  | .                  | . | Vv01g0406 | . |
| .                  | .            | .                  | .                  | .                  | . | .         | . |
| Vv17g0338          | .            | .                  | .                  | .                  | . | .         | . |
| .                  | .            | .                  | .                  | .                  | . | .         | . |
| Vv17g0339          | .            | .                  | .                  | .                  | . | .         | . |
| .                  | .            | .                  | .                  | .                  | . | .         | . |
| Vv17g0340          | .            | .                  | .                  | .                  | . | .         | . |
| .                  | .            | .                  | .                  | .                  | . | .         | . |
| Vv17g0341          | .            | .                  | .                  | .                  | . | .         | . |
| .                  | .            | .                  | .                  | .                  | . | .         | . |
| Vv17g0342          | .            | .                  | .                  | .                  | . | .         | . |
| .                  | .            | .                  | .                  | .                  | . | .         | . |
| Vv17g0343          | .            | .                  | .                  | .                  | . | .         | . |
| .                  | .            | .                  | .                  | .                  | . | .         | . |
| Vv17g0344          | .            | .                  | Gorai.006G059300.1 | .                  | . | .         | . |
| .                  | Vv14g0755    | Tc04_g014320       | .                  | .                  | . | .         | . |
| Gorai.007G182700.1 | .            | .                  | .                  | .                  | . | .         | . |
| .                  | .            | .                  | .                  | .                  | . | .         | . |
| Vv17g0345          | .            | .                  | .                  | .                  | . | .         | . |
| .                  | .            | .                  | .                  | .                  | . | .         | . |
| Vv17g0346          | .            | .                  | Gorai.006G059900.1 | .                  | . | .         | . |
| .                  | .            | .                  | .                  | .                  | . | .         | . |
| .                  | .            | .                  | .                  | .                  | . | .         | . |

|                    |           |                    |                    |   |   |           |   |
|--------------------|-----------|--------------------|--------------------|---|---|-----------|---|
| Vv17g0347          | .         | .                  | .                  | . | . | .         | . |
| .                  | .         | .                  | .                  | . | . | .         | . |
| Vv17g0348          | .         | .                  | .                  | . | . | .         | . |
| .                  | .         | .                  | .                  | . | . | .         | . |
| Vv17g0349          | .         | .                  | Gorai.006G060000.1 | . | . | .         | . |
| .                  | Vv14g0764 | Tc04_g014420       | .                  | . | . | .         | . |
| Gorai.011G228800.1 | .         | .                  | .                  | . | . | .         | . |
| .                  | .         | .                  | .                  | . | . | .         | . |
| Vv17g0350          | .         | Gorai.001G081500.1 | .                  | . | . | .         | . |
| .                  | .         | .                  | .                  | . | . | .         | . |
| Vv01g0387          | .         | .                  | .                  | . | . | .         | . |
| Gorai.012G124200.1 | .         | .                  | .                  | . | . | .         | . |
| Vv17g0351          | .         | Gorai.001G081300.1 | .                  | . | . | .         | . |
| .                  | .         | .                  | .                  | . | . | .         | . |
| Vv01g0384          | .         | .                  | Gorai.005G192100.1 | . | . | .         | . |
| Gorai.009G347900.1 | .         | Gorai.012G124300.1 | .                  | . | . | .         | . |
| Vv17g0352          | .         | .                  | .                  | . | . | .         | . |
| .                  | .         | .                  | .                  | . | . | .         | . |
| Vv17g0353          | .         | .                  | .                  | . | . | .         | . |
| .                  | .         | .                  | .                  | . | . | Vv01g0381 | . |
| Vv17g0354          | .         | .                  | .                  | . | . | .         | . |
| .                  | .         | .                  | .                  | . | . | .         | . |
| Vv17g0355          | .         | Gorai.001G081000.1 | .                  | . | . | .         | . |
| .                  | Vv14g0771 | Tc04_g014610       | .                  | . | . | .         | . |
| .                  | .         | Vv01g0374          | .                  | . | . | .         | . |
| Vv17g0356          | .         | .                  | .                  | . | . | .         | . |
| .                  | .         | .                  | .                  | . | . | .         | . |
| Vv17g0357          | .         | .                  | .                  | . | . | .         | . |
| .                  | .         | .                  | .                  | . | . | .         | . |
| Vv17g0358          | .         | .                  | .                  | . | . | Gorai.    | . |
| 006G194200.1       | .         | .                  | .                  | . | . | .         | . |
| Vv17g0359          | .         | .                  | .                  | . | . | .         | . |
| .                  | .         | .                  | .                  | . | . | .         | . |
| Vv17g0360          | .         | .                  | .                  | . | . | .         | . |
| .                  | .         | .                  | .                  | . | . | .         | . |
| Vv17g0361          | .         | .                  | Gorai.006G060100.1 | . | . | .         | . |
| .                  | Vv14g0777 | Tc04_g014640       | .                  | . | . | .         | . |
| .                  | .         | .                  | .                  | . | . | .         | . |
| .                  | .         | .                  | .                  | . | . | .         | . |

|              |                    |                    |                    |
|--------------|--------------------|--------------------|--------------------|
| Vv17g0362    | .                  | Gorai.001G075100.1 | Gorai.006G060200.1 |
| .            | .                  | Gorai.006G194400.1 | Vv14g0780          |
| Tc04_g014680 | .                  | .                  | .                  |
| .            | .                  | .                  | .                  |
| Vv17g0363    | .                  | .                  | .                  |
| .            | .                  | .                  | .                  |
| Vv17g0364    | Tc03_g015710       | .                  | .                  |
| .            | .                  | .                  | .                  |
| Vv17g0365    | .                  | .                  | .                  |
| .            | .                  | .                  | .                  |
| Vv17g0366    | .                  | .                  | .                  |
| .            | .                  | .                  | .                  |
| Vv17g0367    | .                  | .                  | .                  |
| .            | .                  | .                  | .                  |
| Vv17g0368    | .                  | .                  | .                  |
| .            | .                  | .                  | .                  |
| Vv17g0369    | Tc03_g015620       | Gorai.001G074900.1 | Gorai.             |
| 006G060400.1 | Gorai.007G044400.1 | .                  | Gorai.006G194500.1 |
| .            | .                  | .                  | .                  |
| Vv17g0370    | .                  | Gorai.006G060500.1 | .                  |
| .            | .                  | .                  | .                  |
| Vv17g0371    | .                  | .                  | .                  |
| .            | .                  | .                  | .                  |
| Vv17g0372    | .                  | .                  | .                  |
| .            | .                  | .                  | .                  |
| Vv17g0373    | .                  | .                  | .                  |
| .            | .                  | .                  | .                  |
| Vv17g0374    | .                  | Gorai.001G071900.1 | .                  |
| .            | .                  | .                  | .                  |
| Vv17g0375    | .                  | Gorai.006G060600.1 | .                  |
| .            | .                  | .                  | .                  |
| Vv17g0376    | .                  | .                  | .                  |
| .            | .                  | .                  | .                  |
| Vv17g0377    | .                  | .                  | .                  |
| .            | .                  | .                  | .                  |
| .            | .                  | .                  | .                  |

|              |                    |   |                    |                    |
|--------------|--------------------|---|--------------------|--------------------|
| Vv17g0378    | Tc03_g023390       | . | .                  | Gorai.007G031300.1 |
| .            | .                  | . | .                  | .                  |
| Vv17g0379    | .                  | . | .                  | .                  |
| .            | .                  | . | .                  | .                  |
| Vv17g0380    | .                  | . | .                  | .                  |
| .            | .                  | . | .                  | .                  |
| Vv17g0381    | .                  | . | .                  | Gorai.             |
| 006G194600.1 | .                  | . | .                  | .                  |
| .            | .                  | . | .                  | .                  |
| Vv17g0382    | .                  | . | .                  | .                  |
| .            | .                  | . | .                  | .                  |
| Vv17g0383    | .                  | . | .                  | .                  |
| Vv14g0790    | Tc04_g014790       | . | .                  | Gorai.007G181500.1 |
| .            | Vv01g0353          | . | .                  | Gorai.             |
| 005G190600.1 | .                  | . | .                  | .                  |
| Vv17g0384    | .                  | . | .                  | .                  |
| .            | .                  | . | .                  | .                  |
| Vv17g0385    | .                  | . | .                  | .                  |
| .            | .                  | . | .                  | .                  |
| Vv17g0386    | .                  | . | .                  | .                  |
| .            | .                  | . | .                  | .                  |
| Vv17g0387    | .                  | . | .                  | .                  |
| .            | .                  | . | .                  | .                  |
| Vv17g0388    | .                  | . | .                  | .                  |
| .            | .                  | . | .                  | .                  |
| Vv17g0389    | .                  | . | .                  | .                  |
| .            | .                  | . | .                  | .                  |
| Vv17g0390    | .                  | . | Gorai.006G061200.1 | .                  |
| .            | Vv14g0795          | . | Tc04_g014830       | .                  |
| .            | Vv01g0351          | . | Tc02_g010100       | Gorai.             |
| 002G217800.1 | Gorai.005G190300.1 | . | .                  | .                  |
| Vv17g0391    | .                  | . | .                  | .                  |
| .            | .                  | . | .                  | .                  |
| Vv17g0392    | .                  | . | Gorai.006G061400.1 | .                  |
| .            | .                  | . | .                  | .                  |
| Vv17g0393    | .                  | . | .                  | .                  |
| .            | .                  | . | .                  | .                  |
| .            | .                  | . | .                  | .                  |

|                    |                    |                    |                    |              |                    |           |   |
|--------------------|--------------------|--------------------|--------------------|--------------|--------------------|-----------|---|
| Vv17g0394          | .                  | .                  | .                  | .            | .                  | .         | . |
| .                  | .                  | .                  | .                  | .            | .                  | Vv01g0347 | . |
| .                  | Gorai.002G218400.1 | .                  | .                  | .            | .                  | .         | . |
| Vv17g0395          | .                  | .                  | .                  | .            | .                  | .         | . |
| .                  | .                  | .                  | .                  | .            | .                  | .         | . |
| Vv17g0396          | .                  | .                  | .                  | .            | .                  | .         | . |
| .                  | .                  | .                  | .                  | .            | .                  | .         | . |
| Vv17g0397          | .                  | .                  | .                  | .            | .                  | .         | . |
| .                  | .                  | .                  | .                  | .            | .                  | .         | . |
| Vv17g0398          | .                  | .                  | .                  | .            | .                  | .         | . |
| .                  | .                  | .                  | .                  | .            | .                  | .         | . |
| Vv17g0399          | .                  | .                  | .                  | .            | .                  | .         | . |
| .                  | .                  | .                  | .                  | .            | .                  | .         | . |
| Vv17g0400          | .                  | .                  | .                  | .            | .                  | .         | . |
| .                  | .                  | .                  | .                  | .            | .                  | .         | . |
| Vv17g0401          | .                  | .                  | .                  | .            | .                  | Gorai.    | . |
| 006G194900.1       | .                  | .                  | .                  | .            | .                  | .         | . |
| .                  | .                  | .                  | .                  | .            | .                  | .         | . |
| Vv17g0402          | .                  | .                  | .                  | .            | .                  | .         | . |
| .                  | .                  | .                  | .                  | .            | .                  | .         | . |
| Vv17g0403          | .                  | .                  | Gorai.006G061500.1 | .            | .                  | .         | . |
| Gorai.008G184200.1 | .                  | Gorai.006G195000.1 | .                  | .            | .                  | .         | . |
| .                  | .                  | .                  | .                  | .            | .                  | .         | . |
| .                  | .                  | .                  | .                  | .            | .                  | .         | . |
| Vv17g0404          | Tc03_g023370       | .                  | .                  | .            | Gorai.             | .         | . |
| 008G184400.1       | Gorai.006G195100.1 | .                  | .                  | .            | .                  | .         | . |
| .                  | .                  | Vv01g0323          | .                  | Tc02_g034330 | .                  | .         | . |
| .                  | .                  | Gorai.008G184400.1 | .                  | .            | .                  | .         | . |
| Vv17g0405          | .                  | .                  | .                  | .            | .                  | .         | . |
| .                  | .                  | .                  | .                  | .            | .                  | .         | . |
| Vv17g0406          | .                  | .                  | .                  | .            | Gorai.008G184500.1 | .         | . |
| .                  | .                  | .                  | .                  | .            | .                  | .         | . |
| .                  | Vv01g0322          | Tc02_g034340       | Gorai.013G081300.1 | .            | .                  | .         | . |
| .                  | Gorai.008G184500.1 | .                  | .                  | .            | .                  | .         | . |
| Vv17g0407          | .                  | .                  | .                  | .            | .                  | .         | . |
| .                  | .                  | .                  | .                  | .            | .                  | .         | . |
| Vv17g0408          | Tc03_g013740       | .                  | .                  | .            | .                  | .         | . |
| .                  | .                  | .                  | .                  | .            | .                  | .         | . |
| Vv17g0409          | .                  | .                  | .                  | .            | .                  | .         | . |
| .                  | .                  | .                  | .                  | .            | .                  | .         | . |

|                    |                    |                    |   |                    |        |   |
|--------------------|--------------------|--------------------|---|--------------------|--------|---|
| Vv17g0410          | Tc03_g013710       | .                  | . | .                  | .      | . |
| .                  | .                  | .                  | . | .                  | .      | . |
| Vv17g0411          | Tc03_g013700       | .                  | . | .                  | .      | . |
| .                  | .                  | .                  | . | .                  | .      | . |
| Vv17g0412          | .                  | .                  | . | .                  | .      | . |
| .                  | .                  | .                  | . | .                  | .      | . |
| Vv17g0413          | Tc03_g013660       | .                  | . | .                  | .      | . |
| .                  | .                  | .                  | . | .                  | .      | . |
| Vv17g0414          | .                  | .                  | . | .                  | .      | . |
| .                  | .                  | .                  | . | .                  | .      | . |
| Vv17g0415          | Tc03_g013620       | .                  | . | Gorai.007G041400.1 | .      | . |
| .                  | .                  | .                  | . | .                  | .      | . |
| Vv17g0416          | Tc03_g007350       | .                  | . | .                  | .      | . |
| Gorai.006G195200.1 | .                  | .                  | . | .                  | .      | . |
| .                  | .                  | .                  | . | .                  | .      | . |
| Vv17g0417          | .                  | Gorai.006G062300.1 | . | .                  | .      | . |
| Gorai.008G184700.1 | Gorai.006G195300.1 | Vv14g0817          | . | .                  | .      | . |
| .                  | .                  | Vv01g0318          | . | .                  | .      | . |
| Tc02_g034400       | .                  | Gorai.008G184800.1 | . | .                  | .      | . |
| Vv17g0418          | .                  | .                  | . | .                  | .      | . |
| .                  | .                  | .                  | . | .                  | .      | . |
| Vv17g0419          | .                  | Gorai.006G062600.1 | . | .                  | .      | . |
| .                  | .                  | .                  | . | .                  | .      | . |
| Vv17g0420          | .                  | .                  | . | .                  | Gorai. | . |
| 006G195500.1       | .                  | .                  | . | .                  | .      | . |
| .                  | .                  | .                  | . | .                  | .      | . |
| Vv17g0421          | Tc03_g031200       | .                  | . | .                  | .      | . |
| .                  | .                  | .                  | . | .                  | .      | . |
| Vv01g0314          | Tc02_g034440       | .                  | . | .                  | .      | . |
| Vv17g0422          | .                  | .                  | . | .                  | .      | . |
| .                  | .                  | .                  | . | .                  | .      | . |
| Vv17g0423          | .                  | .                  | . | .                  | .      | . |
| .                  | .                  | .                  | . | .                  | .      | . |
| Vv17g0424          | .                  | .                  | . | .                  | .      | . |
| .                  | .                  | .                  | . | .                  | .      | . |
| Vv17g0425          | .                  | .                  | . | .                  | .      | . |
| .                  | .                  | .                  | . | .                  | .      | . |
| .                  | .                  | .                  | . | .                  | .      | . |

|                    |              |                    |                    |                    |                    |           |   |
|--------------------|--------------|--------------------|--------------------|--------------------|--------------------|-----------|---|
| Vv17g0426          | .            | .                  | .                  | .                  | .                  | .         | . |
| .                  | .            | .                  | .                  | .                  | .                  | .         | . |
| Vv17g0427          | .            | .                  | .                  | .                  | .                  | .         | . |
| .                  | .            | .                  | .                  | .                  | .                  | Vv01g0309 | . |
| Tc02_g034480       | .            | Gorai.013G080300.1 | .                  | .                  | Gorai.005G138200.1 | .         | . |
| .                  | .            | .                  | .                  | .                  | .                  | .         | . |
| Vv17g0428          | Tc03_g007010 | .                  | .                  | Gorai.007G003000.1 | .                  | .         | . |
| .                  | .            | Vv14g0832          | Tc04_g015170       | .                  | .                  | .         | . |
| .                  | .            | .                  | .                  | .                  | .                  | .         | . |
| Vv17g0429          | .            | .                  | .                  | .                  | .                  | .         | . |
| .                  | .            | .                  | .                  | .                  | .                  | .         | . |
| Vv17g0430          | .            | .                  | .                  | .                  | .                  | .         | . |
| .                  | .            | .                  | .                  | .                  | .                  | .         | . |
| Vv17g0431          | .            | .                  | .                  | .                  | .                  | .         | . |
| .                  | .            | .                  | .                  | .                  | .                  | .         | . |
| Vv17g0432          | .            | .                  | .                  | .                  | .                  | .         | . |
| .                  | .            | .                  | .                  | .                  | .                  | .         | . |
| Vv17g0433          | .            | .                  | Gorai.006G063000.1 | .                  | .                  | .         | . |
| .                  | .            | .                  | .                  | .                  | .                  | .         | . |
| Vv17g0434          | .            | .                  | .                  | .                  | .                  | .         | . |
| .                  | .            | .                  | .                  | .                  | .                  | .         | . |
| Vv17g0435          | .            | .                  | .                  | .                  | .                  | .         | . |
| .                  | .            | .                  | .                  | .                  | .                  | .         | . |
| Vv17g0436          | .            | .                  | .                  | .                  | Gorai.008G186500.1 | .         | . |
| .                  | .            | .                  | .                  | .                  | .                  | .         | . |
| Vv01g0291          | Tc02_g034610 | .                  | .                  | .                  | .                  | .         | . |
| Gorai.008G186500.1 | .            | .                  | .                  | .                  | .                  | .         | . |
| Vv17g0437          | .            | Gorai.006G063200.1 | .                  | .                  | .                  | .         | . |
| .                  | .            | .                  | .                  | .                  | .                  | .         | . |
| Vv01g0290          | Tc02_g034630 | Gorai.013G079900.1 | .                  | .                  | .                  | .         | . |
| Gorai.005G137800.1 | .            | .                  | .                  | .                  | .                  | .         | . |
| Vv17g0438          | .            | .                  | .                  | .                  | .                  | .         | . |
| .                  | .            | .                  | .                  | .                  | .                  | .         | . |
| Vv17g0439          | .            | .                  | Gorai.006G063300.1 | .                  | .                  | .         | . |
| .                  | .            | .                  | .                  | .                  | .                  | .         | . |
| Vv17g0440          | .            | .                  | .                  | .                  | Gorai.008G186800.1 | .         | . |
| .                  | .            | .                  | .                  | .                  | .                  | .         | . |
| Vv01g0287          | Tc02_g034650 | .                  | .                  | .                  | .                  | .         | . |
| Gorai.008G186800.1 | .            | .                  | .                  | .                  | .                  | .         | . |



|                    |              |              |                    |   |                    |                    |   |
|--------------------|--------------|--------------|--------------------|---|--------------------|--------------------|---|
| Vv17g0441          | .            | .            | .                  | . | .                  | .                  | . |
| .                  | .            | .            | .                  | . | .                  | .                  | . |
| Vv17g0442          | .            | .            | .                  | . | .                  | .                  | . |
| .                  | .            | .            | .                  | . | .                  | .                  | . |
| Vv17g0443          | .            | .            | .                  | . | .                  | .                  | . |
| .                  | .            | .            | .                  | . | .                  | .                  | . |
| Vv17g0444          | .            | .            | .                  | . | .                  | Gorai.008G187000.1 | . |
| .                  | .            | .            | .                  | . | .                  | .                  | . |
|                    | Vv01g0282    | Tc02_g034690 | .                  | . | .                  | .                  | . |
| Gorai.008G187000.1 | .            | .            | .                  | . | .                  | .                  | . |
| Vv17g0445          | .            | .            | Gorai.006G063500.1 | . | .                  | .                  | . |
| .                  | Vv14g0845    | .            | .                  | . | .                  | .                  | . |
| .                  | .            | .            | .                  | . | .                  | .                  | . |
| Vv17g0446          | .            | .            | .                  | . | .                  | .                  | . |
| Vv14g0846          | Tc04_g015310 | .            | .                  | . | .                  | .                  | . |
| .                  | .            | .            | .                  | . | .                  | .                  | . |
| Vv17g0447          | .            | .            | .                  | . | .                  | .                  | . |
| .                  | .            | .            | .                  | . | .                  | .                  | . |
| Vv17g0448          | .            | .            | .                  | . | .                  | .                  | . |
| .                  | .            | .            | .                  | . | .                  | .                  | . |
| Vv17g0449          | .            | .            | .                  | . | .                  | .                  | . |
| .                  | .            | .            | .                  | . | .                  | .                  | . |
| Vv17g0450          | .            | .            | .                  | . | .                  | .                  | . |
| .                  | .            | .            | .                  | . | .                  | .                  | . |
| Vv17g0451          | .            | .            | .                  | . | .                  | .                  | . |
| .                  | .            | .            | .                  | . | .                  | .                  | . |
| Vv17g0452          | Tc03_g013520 | .            | .                  | . | Gorai.007G041300.1 | .                  | . |
| .                  | .            | .            | .                  | . | .                  | .                  | . |
| Vv17g0453          | .            | .            | .                  | . | .                  | .                  | . |
| .                  | .            | .            | .                  | . | .                  | .                  | . |
| Vv17g0454          | Tc03_g013510 | .            | .                  | . | .                  | .                  | . |
| .                  | .            | .            | .                  | . | .                  | .                  | . |
| Vv17g0455          | .            | .            | .                  | . | .                  | .                  | . |
| .                  | .            | .            | .                  | . | .                  | .                  | . |
| Vv17g0456          | Tc03_g013500 | .            | .                  | . | .                  | .                  | . |
| .                  | .            | .            | .                  | . | .                  | .                  | . |
| Vv17g0457          | Tc03_g013490 | .            | .                  | . | Gorai.007G041200.1 | .                  | . |

|                    |                    |                    |                    |                    |        |
|--------------------|--------------------|--------------------|--------------------|--------------------|--------|
|                    | Gorai.008G187800.1 | .                  | .                  | .                  | .      |
|                    | .                  | .                  | Vv01g0274          | Tc02_g034770       | .      |
|                    | .                  | .                  | Gorai.008G187800.1 | .                  | .      |
| Vv17g0458          | Tc03_g013480       | Gorai.001G064700.1 | .                  | .                  | .      |
| .                  | Gorai.006G269400.1 | .                  | .                  | .                  | .      |
| .                  | .                  | .                  | .                  | .                  | .      |
| Vv17g0459          | .                  | .                  | .                  | .                  | .      |
| .                  | .                  | .                  | .                  | .                  | .      |
| Vv17g0460          | Tc03_g031220       | .                  | .                  | .                  | .      |
| .                  | .                  | .                  | .                  | .                  | .      |
| Vv17g0461          | .                  | .                  | .                  | .                  | .      |
| .                  | .                  | .                  | .                  | .                  | .      |
| Vv17g0462          | .                  | .                  | .                  | .                  | .      |
| .                  | .                  | .                  | .                  | .                  | .      |
| Vv17g0463          | .                  | .                  | .                  | .                  | .      |
| .                  | .                  | .                  | .                  | .                  | .      |
| Vv17g0464          | .                  | .                  | .                  | .                  | .      |
| .                  | .                  | .                  | .                  | .                  | .      |
| Vv17g0465          | .                  | .                  | .                  | .                  | .      |
| .                  | .                  | .                  | .                  | .                  | .      |
| Vv17g0466          | .                  | .                  | .                  | .                  | .      |
| .                  | .                  | .                  | .                  | .                  | .      |
| Vv17g0467          | Tc03_g013470       | .                  | .                  | .                  | .      |
| .                  | .                  | .                  | .                  | .                  | .      |
| Vv17g0468          | Tc03_g013460       | .                  | .                  | .                  | .      |
| .                  | .                  | .                  | .                  | .                  | .      |
| Vv01g0251          | Tc02_g034900       | .                  | .                  | .                  | Gorai. |
| 008G188500.1       | .                  | .                  | .                  | .                  | .      |
| Vv17g0469          | Gorai.001G064800.1 | .                  | .                  | .                  | .      |
| Gorai.008G188500.1 | .                  | .                  | .                  | .                  | .      |
| .                  | .                  | .                  | .                  | .                  | .      |
| Vv17g0470          | Tc03_g013450       | .                  | .                  | Gorai.007G041100.1 | .      |
| .                  | Gorai.008G188600.1 | .                  | .                  | .                  | .      |
| .                  | .                  | .                  | .                  | .                  | .      |
| Vv17g0471          | Tc03_g013430       | Gorai.001G064900.1 | .                  | .                  | .      |
| .                  | .                  | .                  | .                  | .                  | .      |
| .                  | .                  | .                  | .                  | .                  | .      |
| Vv17g0472          | Tc03_g013410       | .                  | .                  | .                  | .      |

|                    |              |                    |                    |   |
|--------------------|--------------|--------------------|--------------------|---|
| Vv17g0473          | Tc03_g013400 | Gorai.001G065100.1 | .                  | . |
| Vv17g0474          | Tc03_g013390 | .                  | .                  | . |
| Vv17g0475          | .            | .                  | .                  | . |
| Vv17g0476          | Tc03_g013380 | .                  | .                  | . |
| Vv17g0477          | Tc03_g013370 | Gorai.001G065200.1 | .                  | . |
| Vv17g0478          | .            | .                  | .                  | . |
| Vv17g0479          | Tc03_g013340 | .                  | .                  | . |
| Vv17g0480          | Tc03_g013330 | Gorai.001G065400.1 | .                  | . |
| Gorai.007G040900.1 | .            | .                  | .                  | . |
| Vv17g0481          | Tc03_g013320 | .                  | .                  | . |
| Vv17g0482          | .            | .                  | .                  | . |
| Vv14g0878          | .            | .                  | .                  | . |
| Vv17g0483          | .            | .                  | Gorai.008G201500.1 | . |
| Vv17g0484          | .            | Gorai.001G065600.1 | .                  | . |
| Vv17g0485          | .            | .                  | .                  | . |
| Vv17g0486          | .            | Gorai.001G065700.1 | .                  | . |
| Vv17g0487          | Tc03_g013310 | .                  | .                  | . |
| Vv17g0488          | .            | .                  | .                  | . |

|                    |              |                    |   |   |        |
|--------------------|--------------|--------------------|---|---|--------|
| Vv17g0489          | Tc03_g013300 | .                  | . | . | Gorai. |
| 008G173900.1       | .            | .                  | . | . | .      |
| Vv17g0490          | .            | .                  | . | . | .      |
| .                  | .            | .                  | . | . | .      |
| Vv17g0491          | .            | .                  | . | . | .      |
| .                  | .            | .                  | . | . | .      |
| Vv17g0492          | Tc03_g013270 | Gorai.001G065800.1 | . | . | .      |
| Gorai.008G201400.1 | .            | .                  | . | . | .      |
| .                  | .            | .                  | . | . | .      |
| Vv17g0493          | Tc03_g013260 | .                  | . | . | Gorai. |
| 008G174100.1       | .            | .                  | . | . | .      |
| Vv17g0494          | Tc03_g013240 | Gorai.001G065900.1 | . | . | .      |
| .                  | .            | .                  | . | . | .      |
| Vv17g0495          | Tc03_g013230 | Gorai.001G066000.1 | . | . | .      |
| Gorai.008G201200.1 | .            | .                  | . | . | .      |
| .                  | .            | .                  | . | . | .      |
| Vv17g0496          | .            | .                  | . | . | .      |
| .                  | .            | .                  | . | . | .      |
| Vv17g0497          | .            | .                  | . | . | Gorai. |
| 006G269300.1       | .            | .                  | . | . | .      |
| Vv17g0498          | .            | .                  | . | . | .      |
| .                  | .            | .                  | . | . | .      |
| Vv17g0499          | Tc03_g013160 | .                  | . | . | .      |
| .                  | .            | .                  | . | . | .      |
| Vv17g0500          | Tc03_g013150 | .                  | . | . | .      |
| .                  | .            | .                  | . | . | .      |
| Vv17g0501          | .            | .                  | . | . | .      |
| .                  | .            | .                  | . | . | .      |
| Vv17g0502          | .            | .                  | . | . | .      |
| .                  | .            | .                  | . | . | .      |
| Vv17g0503          | .            | .                  | . | . | .      |
| .                  | .            | .                  | . | . | .      |
| Vv17g0504          | .            | .                  | . | . | .      |
| .                  | .            | .                  | . | . | .      |

|                    |                    |                    |           |                    |        |   |
|--------------------|--------------------|--------------------|-----------|--------------------|--------|---|
| Vv17g0505          | Tc03_g012880       | .                  | .         | Gorai.007G040800.1 | .      | . |
|                    | Gorai.008G200700.1 | .                  | .         | .                  | .      | . |
| Vv17g0506          | .                  | .                  | .         | .                  | .      | . |
| Vv17g0507          | Tc03_g012860       | .                  | .         | .                  | .      | . |
| Vv17g0508          | Tc03_g012850       | .                  | .         | .                  | .      | . |
| Vv17g0509          | Tc03_g012800       | .                  | .         | .                  | .      | . |
| Vv17g0510          | .                  | .                  | .         | .                  | .      | . |
| Vv17g0511          | Tc03_g012780       | Gorai.001G066400.1 | .         | .                  | .      | . |
| Vv17g0512          | Tc03_g012770       | Gorai.001G066500.1 | .         | .                  | .      | . |
|                    | Gorai.008G175000.1 | .                  | Vv14g0917 | .                  | .      | . |
| Vv17g0513          | Tc03_g012760       | .                  | .         | .                  | Gorai. | . |
| 008G175100.1       | Gorai.006G269200.1 | Vv14g0921          | .         | .                  | .      | . |
|                    | Gorai.007G040600.1 | .                  | .         | .                  | .      | . |
| Vv17g0514          | Tc03_g012750       | Gorai.001G066600.1 | .         | .                  | .      | . |
| Gorai.007G040500.1 | .                  | Vv14g0922          | .         | .                  | .      | . |
| Vv17g0515          | .                  | .                  | .         | .                  | .      | . |
| Vv17g0516          | .                  | .                  | .         | .                  | .      | . |
| Vv17g0517          | Tc03_g012730       | Gorai.001G066900.1 | .         | .                  | .      | . |
| Vv17g0518          | .                  | Gorai.001G067000.1 | .         | .                  | .      | . |
|                    | Gorai.006G268800.1 | .                  | .         | .                  | .      | . |
| Vv17g0519          | .                  | Gorai.001G067300.1 | .         | .                  | .      | . |
|                    | Gorai.006G268700.1 | .                  | .         | .                  | .      | . |

|           |           |                    |   |   |                    |   |   |
|-----------|-----------|--------------------|---|---|--------------------|---|---|
| .         | .         | .                  | . | . | .                  | . | . |
| .         | .         | .                  | . | . | .                  | . | . |
| Vv17g0520 | .         | .                  | . | . | Gorai.008G200500.1 | . | . |
| .         | .         | .                  | . | . | .                  | . | . |
| Vv17g0521 | .         | .                  | . | . | .                  | . | . |
| .         | .         | .                  | . | . | .                  | . | . |
| Vv17g0522 | .         | .                  | . | . | .                  | . | . |
| .         | .         | .                  | . | . | .                  | . | . |
| Vv17g0523 | .         | .                  | . | . | .                  | . | . |
| .         | .         | .                  | . | . | .                  | . | . |
| Vv17g0524 | .         | .                  | . | . | Gorai.008G200400.1 | . | . |
| .         | .         | .                  | . | . | .                  | . | . |
| Vv17g0525 | .         | Gorai.001G067500.1 | . | . | .                  | . | . |
| .         | Vv14g0926 | .                  | . | . | .                  | . | . |
| Vv17g0526 | .         | .                  | . | . | .                  | . | . |
| .         | .         | .                  | . | . | .                  | . | . |
| Vv17g0527 | .         | .                  | . | . | .                  | . | . |
| .         | .         | .                  | . | . | .                  | . | . |
| Vv17g0528 | .         | .                  | . | . | .                  | . | . |
| .         | .         | .                  | . | . | .                  | . | . |
| Vv17g0529 | .         | .                  | . | . | .                  | . | . |
| .         | .         | .                  | . | . | .                  | . | . |
| Vv17g0530 | .         | .                  | . | . | .                  | . | . |
| .         | .         | .                  | . | . | .                  | . | . |
| Vv17g0531 | .         | .                  | . | . | Gorai.008G200300.1 | . | . |
| .         | .         | .                  | . | . | .                  | . | . |
| Vv17g0532 | .         | .                  | . | . | .                  | . | . |
| .         | .         | .                  | . | . | .                  | . | . |
| Vv17g0533 | .         | .                  | . | . | .                  | . | . |
| .         | .         | .                  | . | . | .                  | . | . |
| Vv17g0534 | .         | .                  | . | . | .                  | . | . |
| .         | .         | .                  | . | . | .                  | . | . |
| Vv17g0535 | .         | .                  | . | . | .                  | . | . |
| .         | .         | .                  | . | . | .                  | . | . |
| .         | .         | .                  | . | . | .                  | . | . |

|                    |                    |                    |   |   |   |        |   |
|--------------------|--------------------|--------------------|---|---|---|--------|---|
| Vv17g0536          | .                  | .                  | . | . | . | .      | . |
| .                  | .                  | .                  | . | . | . | .      | . |
| Vv17g0537          | Tc03_g012650       | Gorai.001G075600.1 | . | . | . | .      | . |
| Gorai.007G039900.1 | .                  | .                  | . | . | . | .      | . |
| .                  | .                  | .                  | . | . | . | .      | . |
| Vv17g0538          | Tc03_g012620       | .                  | . | . | . | .      | . |
| Vv14g0934          | Tc05_g031790       | .                  | . | . | . | .      | . |
| .                  | .                  | .                  | . | . | . | .      | . |
| Vv17g0539          | Tc03_g012600       | Gorai.001G075800.1 | . | . | . | .      | . |
| .                  | Gorai.006G268400.1 | Vv14g0936          | . | . | . | .      | . |
| .                  | .                  | .                  | . | . | . | .      | . |
| Vv17g0540          | .                  | .                  | . | . | . | .      | . |
| .                  | .                  | .                  | . | . | . | .      | . |
| Vv17g0541          | .                  | .                  | . | . | . | .      | . |
| .                  | .                  | .                  | . | . | . | .      | . |
| Vv17g0542          | Tc03_g012560       | Gorai.001G076300.1 | . | . | . | .      | . |
| Gorai.008G200200.1 | .                  | Vv14g0941          | . | . | . | .      | . |
| Gorai.001G208000.1 | Gorai.007G039800.1 | .                  | . | . | . | .      | . |
| .                  | .                  | .                  | . | . | . | .      | . |
| Vv17g0543          | .                  | .                  | . | . | . | .      | . |
| .                  | .                  | .                  | . | . | . | .      | . |
| Vv17g0544          | Tc03_g012500       | .                  | . | . | . | .      | . |
| .                  | .                  | .                  | . | . | . | .      | . |
| Vv17g0545          | .                  | .                  | . | . | . | .      | . |
| .                  | .                  | .                  | . | . | . | .      | . |
| Vv17g0546          | Tc03_g012490       | Gorai.001G076200.1 | . | . | . | .      | . |
| Gorai.008G200100.1 | .                  | Vv14g0948          | . | . | . | .      | . |
| .                  | .                  | .                  | . | . | . | .      | . |
| Vv17g0547          | Tc03_g012460       | .                  | . | . | . | Gorai. | . |
| 008G200000.1       | Vv14g0949          | .                  | . | . | . | Gorai. | . |
| 001G208300.1       | .                  | .                  | . | . | . | .      | . |
| .                  | .                  | .                  | . | . | . | .      | . |
| Vv17g0548          | .                  | .                  | . | . | . | .      | . |
| .                  | .                  | .                  | . | . | . | .      | . |
| Vv17g0549          | Tc03_g012440       | Gorai.001G076000.1 | . | . | . | .      | . |
| .                  | .                  | .                  | . | . | . | .      | . |
| Vv17g0550          | Tc03_g012430       | .                  | . | . | . | Gorai. | . |
| 008G199900.1       | .                  | .                  | . | . | . | .      | . |
| .                  | .                  | .                  | . | . | . | .      | . |

|                    |              |   |   |   |   |        |   |
|--------------------|--------------|---|---|---|---|--------|---|
| Vv17g0551          | .            | . | . | . | . | .      | . |
| .                  | .            | . | . | . | . | .      | . |
| Vv17g0552          | .            | . | . | . | . | .      | . |
| .                  | .            | . | . | . | . | .      | . |
| Vv17g0553          | .            | . | . | . | . | .      | . |
| .                  | .            | . | . | . | . | .      | . |
| Vv17g0554          | Tc03_g012420 | . | . | . | . | .      | . |
| .                  | .            | . | . | . | . | .      | . |
| Vv17g0555          | .            | . | . | . | . | .      | . |
| .                  | .            | . | . | . | . | .      | . |
| Vv17g0556          | .            | . | . | . | . | .      | . |
| .                  | .            | . | . | . | . | .      | . |
| Vv17g0557          | .            | . | . | . | . | .      | . |
| .                  | .            | . | . | . | . | .      | . |
| Vv17g0558          | .            | . | . | . | . | .      | . |
| .                  | .            | . | . | . | . | .      | . |
| Vv17g0559          | .            | . | . | . | . | .      | . |
| .                  | .            | . | . | . | . | .      | . |
| Vv17g0560          | Tc03_g012380 | . | . | . | . | .      | . |
| .                  | .            | . | . | . | . | .      | . |
| Vv17g0561          | .            | . | . | . | . | .      | . |
| .                  | .            | . | . | . | . | .      | . |
| Vv17g0562          | Tc03_g012370 | . | . | . | . | .      | . |
| .                  | .            | . | . | . | . | .      | . |
| Vv17g0563          | Tc03_g012360 | . | . | . | . | .      | . |
| Gorai.006G268300.1 | .            | . | . | . | . | .      | . |
| Vv17g0564          | .            | . | . | . | . | .      | . |
| .                  | .            | . | . | . | . | .      | . |
| Vv17g0565          | Tc03_g012320 | . | . | . | . | Gorai. | . |
| 008G199700.1       | .            | . | . | . | . | .      | . |
| Vv17g0566          | Tc03_g012300 | . | . | . | . | .      | . |
| Gorai.006G268200.1 | .            | . | . | . | . | .      | . |
| Vv17g0567          | Tc03_g012260 | . | . | . | . | .      | . |
| Vv14g0985          | Tc04_g026400 | . | . | . | . | Gorai. | . |



|              |                    |   |   |                    |   |
|--------------|--------------------|---|---|--------------------|---|
| 007G039600.1 | Gorai.006G009900.1 | . | . | .                  | . |
| Vv17g0568    | .                  | . | . | Gorai.008G199600.1 | . |
|              | Gorai.006G265200.1 | . | . | .                  | . |
| .            | .                  | . | . | .                  | . |
| Vv17g0569    | Tc03_g012250       | . | . | .                  | . |
| .            | .                  | . | . | .                  | . |
| Vv17g0570    | Tc03_g012240       | . | . | .                  | . |
| .            | .                  | . | . | .                  | . |
| Vv17g0571    | .                  | . | . | .                  | . |
| .            | .                  | . | . | .                  | . |
| Vv17g0572    | .                  | . | . | .                  | . |
| .            | .                  | . | . | .                  | . |
| Vv17g0573    | .                  | . | . | Gorai.008G196700.1 | . |
| .            | .                  | . | . | .                  | . |
| Vv17g0574    | .                  | . | . | Gorai.008G189500.1 | . |
| .            | .                  | . | . | .                  | . |
| Vv17g0575    | .                  | . | . | Gorai.008G189600.1 | . |
| .            | .                  | . | . | .                  | . |
| Vv17g0576    | .                  | . | . | Gorai.008G189700.1 | . |
| .            | Vv14g1504          | . | . | .                  | . |
| .            | Vv01g0892          | . | . | Gorai.             | . |
| 009G346100.1 | Gorai.008G189700.1 | . | . | .                  | . |
| Vv17g0577    | .                  | . | . | .                  | . |
| .            | .                  | . | . | .                  | . |
| Vv17g0578    | .                  | . | . | .                  | . |
| .            | .                  | . | . | .                  | . |
| Vv17g0579    | Gorai.001G074900.1 | . | . | .                  | . |
| .            | .                  | . | . | .                  | . |
| Vv17g0580    | .                  | . | . | Gorai.008G189800.1 | . |
| .            | .                  | . | . | .                  | . |
| Vv17g0581    | .                  | . | . | .                  | . |
| .            | .                  | . | . | .                  | . |
| Vv17g0582    | Tc03_g029670       | . | . | .                  | . |
| .            | .                  | . | . | .                  | . |
| Vv17g0583    | .                  | . | . | .                  | . |

|           |                    |                    |                    |                    |
|-----------|--------------------|--------------------|--------------------|--------------------|
|           | Tc02_g022530       |                    | Gorai.005G189000.1 | Vv01g0907          |
| Vv17g0584 |                    |                    |                    |                    |
| Vv17g0585 |                    |                    |                    |                    |
| Vv17g0586 |                    |                    |                    |                    |
| Vv17g0587 |                    |                    |                    | Gorai.008G189900.1 |
| Vv17g0588 |                    |                    |                    |                    |
| Vv17g0589 | Tc03_g009010       |                    |                    |                    |
| Vv01g0912 |                    |                    |                    |                    |
| Vv17g0590 |                    |                    |                    |                    |
| Vv17g0591 | Tc03_g009030       | Gorai.001G074100.1 |                    |                    |
| Vv17g0592 |                    |                    |                    |                    |
| Vv17g0593 | Tc03_g009040       |                    | Gorai.007G034700.1 |                    |
|           | Gorai.008G190000.1 |                    |                    |                    |
| Vv17g0594 |                    |                    | Gorai.008G190100.1 |                    |
| Vv17g0595 |                    |                    |                    |                    |
| Vv17g0596 |                    |                    |                    |                    |
| Vv14g1533 |                    |                    |                    |                    |
| Vv17g0597 | Tc03_g029740       |                    |                    |                    |
| Vv17g0598 |                    |                    |                    |                    |
| Vv17g0599 | Tc03_g030060       |                    |                    |                    |

|                    |              |                    |                    |                    |                    |           |   |
|--------------------|--------------|--------------------|--------------------|--------------------|--------------------|-----------|---|
| .                  | .            | .                  | .                  | .                  | .                  | .         | . |
| .                  | .            | .                  | .                  | .                  | .                  | .         | . |
| Vv17g0600          | .            | .                  | .                  | .                  | .                  | .         | . |
| Vv14g1539          | .            | .                  | .                  | .                  | .                  | .         | . |
| .                  | .            | .                  | .                  | .                  | .                  | .         | . |
| Vv17g0601          | .            | .                  | .                  | .                  | .                  | .         | . |
| .                  | .            | .                  | .                  | .                  | .                  | .         | . |
| Vv17g0602          | .            | .                  | .                  | .                  | .                  | .         | . |
| .                  | .            | .                  | .                  | .                  | .                  | .         | . |
| Vv17g0603          | .            | .                  | .                  | .                  | .                  | .         | . |
|                    |              |                    |                    |                    |                    | Vv01g0931 | . |
| Tc02_g034200       | .            | .                  | .                  | .                  | .                  | .         | . |
| Vv17g0604          | .            | .                  | .                  | .                  | Gorai.008G190200.1 | .         | . |
| .                  | .            | .                  | .                  | .                  | .                  | .         | . |
| .                  | .            | .                  | .                  | .                  | .                  | .         | . |
| Vv17g0605          | Tc03_g009500 | .                  | Gorai.001G074000.1 | .                  | .                  | .         | . |
| Gorai.007G035200.1 | .            | .                  | .                  | .                  | .                  | .         | . |
| .                  | .            | .                  | .                  | .                  | .                  | .         | . |
| .                  | .            | .                  | .                  | .                  | .                  | .         | . |
| Vv17g0606          | .            | Gorai.001G073900.1 | .                  | .                  | .                  | .         | . |
| .                  | .            | .                  | .                  | .                  | .                  | .         | . |
| .                  | .            | .                  | .                  | .                  | .                  | .         | . |
| Vv17g0607          | Tc03_g009510 | .                  | .                  | Gorai.007G035300.1 | .                  | .         | . |
| .                  | .            | .                  | .                  | .                  | .                  | .         | . |
| Vv17g0608          | .            | .                  | .                  | .                  | .                  | .         | . |
| .                  | .            | .                  | .                  | .                  | .                  | .         | . |
| Vv17g0609          | .            | .                  | .                  | .                  | .                  | .         | . |
| .                  | .            | .                  | .                  | .                  | .                  | .         | . |
| Vv17g0610          | .            | .                  | .                  | .                  | .                  | .         | . |
| .                  | .            | .                  | .                  | .                  | .                  | .         | . |
| Vv17g0611          | .            | .                  | .                  | .                  | .                  | .         | . |
| .                  | .            | .                  | .                  | .                  | .                  | .         | . |
| Vv17g0612          | .            | .                  | .                  | .                  | .                  | .         | . |
| .                  | .            | .                  | .                  | .                  | .                  | .         | . |
| Vv17g0613          | .            | .                  | .                  | .                  | .                  | .         | . |
| .                  | .            | .                  | .                  | .                  | .                  | .         | . |
| Vv17g0614          | Tc03_g009530 | .                  | Gorai.001G073800.1 | .                  | .                  | .         | . |
| .                  | .            | .                  | .                  | .                  | .                  | .         | . |
| Vv17g0615          | Tc03_g009540 | .                  | Gorai.001G073600.1 | .                  | .                  | .         | . |
| Gorai.008G190300.1 | .            | .                  | .                  | .                  | .                  | .         | . |

|              |                    |                    |                    |                    |   |
|--------------|--------------------|--------------------|--------------------|--------------------|---|
|              | .                  | .                  | Vv01g0937          | Tc02_g021810       | . |
|              | Gorai.005G189800.1 | .                  | Gorai.008G190300.1 | .                  | . |
| Vv17g0616    | Tc03_g009550       | .                  | .                  | .                  | . |
|              | Vv14g1543          | Tc04_g025970       | .                  | .                  | . |
|              | Vv01g0940          | Tc02_g034120       | .                  | .                  | . |
| .            | .                  | .                  | .                  | .                  | . |
| Vv17g0617    | Tc03_g009560       | .                  | .                  | .                  | . |
| .            | .                  | .                  | .                  | .                  | . |
| Vv17g0618    | .                  | .                  | .                  | .                  | . |
| .            | .                  | .                  | .                  | .                  | . |
| Vv17g0619    | .                  | .                  | .                  | .                  | . |
| .            | .                  | .                  | .                  | .                  | . |
| Vv17g0620    | Tc03_g009570       | Gorai.001G073500.1 | .                  | .                  | . |
|              | Gorai.008G182800.1 | .                  | .                  | .                  | . |
| .            | .                  | Vv01g0950          | Tc02_g034050       | .                  | . |
| .            | .                  | Gorai.008G182800.1 | .                  | .                  | . |
| Vv17g0621    | Tc03_g009580       | .                  | .                  | Gorai.             | . |
| 008G182700.1 | .                  | Vv14g1551          | .                  | .                  | . |
| .            | .                  | Vv01g0951          | Tc02_g034040       | .                  | . |
| .            | Gorai.008G190600.1 | .                  | .                  | .                  | . |
| Vv17g0622    | Tc03_g009590       | Gorai.001G073200.1 | .                  | .                  | . |
| .            | .                  | .                  | .                  | .                  | . |
| Vv17g0623    | .                  | .                  | .                  | .                  | . |
| .            | .                  | .                  | .                  | .                  | . |
| Vv17g0624    | .                  | .                  | .                  | .                  | . |
| .            | .                  | .                  | .                  | .                  | . |
| Vv17g0625    | Tc03_g009670       | .                  | .                  | .                  | . |
|              | Vv14g1554          | .                  | .                  | .                  | . |
|              | Vv01g0953          | Tc02_g034020       | .                  | .                  | . |
| .            | .                  | .                  | .                  | .                  | . |
| Vv17g0626    | Tc03_g009680       | .                  | .                  | Gorai.             | . |
| 008G190900.1 | .                  | .                  | .                  | .                  | . |
| .            | .                  | .                  | .                  | .                  | . |
| Vv17g0627    | Tc03_g009710       | .                  | .                  | Gorai.             | . |
| 008G191000.1 | .                  | .                  | .                  | .                  | . |
| .            | .                  | .                  | .                  | .                  | . |
| Vv17g0628    | .                  | .                  | .                  | .                  | . |
| .            | .                  | .                  | .                  | .                  | . |
| Vv17g0629    | Tc03_g009780       | .                  | .                  | Gorai.007G035700.1 | . |
| .            | .                  | .                  | .                  | .                  | . |
| .            | .                  | .                  | .                  | .                  | . |
| Vv17g0630    | .                  | .                  | .                  | .                  | . |
| Vv14g1559    | Tc05_g023660       | .                  | .                  | .                  | . |

|                    |                    |                    |                    |   |                    |   |
|--------------------|--------------------|--------------------|--------------------|---|--------------------|---|
| Vv17g0631          | Tc03_g009790       | .                  | .                  | . | .                  | . |
| .                  | .                  | .                  | .                  | . | .                  | . |
| Vv17g0632          | .                  | .                  | .                  | . | .                  | . |
| .                  | .                  | .                  | .                  | . | .                  | . |
| Vv17g0633          | .                  | .                  | .                  | . | .                  | . |
| .                  | .                  | .                  | .                  | . | .                  | . |
| Vv17g0634          | Tc03_g009820       | .                  | .                  | . | Gorai.             | . |
| 008G191200.1       | Vv14g1562          | .                  | .                  | . | .                  | . |
| .                  | Vv01g0961          | Tc02_g033950       | Gorai.             | . | Gorai.             | . |
| 013G074800.1       | .                  | Gorai.008G191200.1 | Gorai.             | . | .                  | . |
| 012G117800.1       | .                  | .                  | .                  | . | .                  | . |
| Vv17g0635          | .                  | .                  | .                  | . | .                  | . |
| .                  | .                  | .                  | .                  | . | .                  | . |
| Vv17g0636          | .                  | .                  | .                  | . | Gorai.008G182300.1 | . |
| .                  | Vv14g1564          | Tc05_g023640       | .                  | . | .                  | . |
| .                  | Vv01g0964          | Tc02_g033920       | .                  | . | .                  | . |
| .                  | Gorai.008G191300.1 | .                  | .                  | . | .                  | . |
| Vv17g0637          | .                  | .                  | .                  | . | .                  | . |
| .                  | .                  | .                  | .                  | . | .                  | . |
| Vv17g0638          | Tc03_g009840       | .                  | .                  | . | .                  | . |
| Vv14g1565          | Tc04_g017560       | .                  | .                  | . | .                  | . |
| .                  | Vv01g0966          | Tc02_g033900       | Gorai.013G082700.1 | . | .                  | . |
| .                  | Gorai.009G323400.1 | .                  | .                  | . | .                  | . |
| Vv17g0639          | Gorai.001G072400.1 | .                  | .                  | . | .                  | . |
| .                  | Vv14g1566          | .                  | .                  | . | Gorai.             | . |
| 007G035800.1       | .                  | .                  | .                  | . | .                  | . |
| .                  | .                  | .                  | .                  | . | .                  | . |
| Vv17g0640          | .                  | .                  | .                  | . | .                  | . |
| .                  | .                  | .                  | .                  | . | .                  | . |
| Vv17g0641          | .                  | .                  | .                  | . | .                  | . |
| .                  | .                  | .                  | .                  | . | .                  | . |
| Vv17g0642          | .                  | .                  | .                  | . | Gorai.008G191700.1 | . |
| .                  | .                  | .                  | .                  | . | .                  | . |
| Vv17g0643          | .                  | .                  | .                  | . | .                  | . |
| Vv14g1580          | .                  | .                  | .                  | . | Gorai.006G023000.1 | . |
| Gorai.012G055600.1 | .                  | .                  | .                  | . | .                  | . |
| .                  | .                  | .                  | .                  | . | .                  | . |
| Vv17g0644          | .                  | .                  | .                  | . | .                  | . |
| .                  | .                  | .                  | .                  | . | .                  | . |
| .                  | .                  | .                  | .                  | . | .                  | . |
| Vv17g0645          | .                  | .                  | .                  | . | Gorai.008G182100.1 | . |

|                    |                    |                    |                    |                    |   |        |   |
|--------------------|--------------------|--------------------|--------------------|--------------------|---|--------|---|
| .                  | .                  | .                  | .                  | .                  | . | .      | . |
| Vv1rg0199          | .                  | .                  | .                  | .                  | . | .      | . |
| Vv17g0646          | .                  | .                  | .                  | .                  | . | .      | . |
| .                  | .                  | .                  | .                  | .                  | . | .      | . |
| Vv17g0647          | Tc03_g009870       | .                  | .                  | .                  | . | Gorai. | . |
| 008G181800.1       | Vv14g1594          | .                  | .                  | .                  | . | Gorai. | . |
| 001G256200.1       | Gorai.007G036200.1 | .                  | .                  | Gorai.006G021800.1 | . | .      | . |
| Vv1rg0186          | .                  | .                  | .                  | .                  | . | .      | . |
| Vv17g0648          | Tc03_g009920       | .                  | .                  | .                  | . | .      | . |
| .                  | .                  | .                  | .                  | .                  | . | .      | . |
| Vv1rg0183          | .                  | .                  | .                  | .                  | . | .      | . |
| Vv17g0649          | Tc03_g010030       | .                  | .                  | .                  | . | Gorai. | . |
| 008G191900.1       | .                  | .                  | .                  | .                  | . | .      | . |
| .                  | .                  | .                  | .                  | .                  | . | .      | . |
| Vv17g0650          | Tc03_g010060       | .                  | .                  | Gorai.007G036300.1 | . | .      | . |
| Gorai.008G192000.1 | .                  | .                  | .                  | .                  | . | .      | . |
| .                  | .                  | .                  | .                  | .                  | . | .      | . |
| Vv17g0651          | Tc03_g010150       | .                  | .                  | .                  | . | .      | . |
| Vv14g1599          | .                  | .                  | Gorai.001G238700.1 | .                  | . | .      | . |
| Gorai.007G036500.1 | Gorai.006G020700.1 | .                  | Gorai.012G055000.1 | .                  | . | .      | . |
| Vv1rg0180          | .                  | .                  | .                  | .                  | . | .      | . |
| Vv17g0652          | Tc03_g010200       | .                  | .                  | Gorai.007G036600.1 | . | .      | . |
| .                  | .                  | .                  | .                  | .                  | . | .      | . |
| Vv17g0653          | Tc03_g010210       | .                  | .                  | .                  | . | Gorai. | . |
| 008G192100.1       | .                  | .                  | .                  | .                  | . | .      | . |
| .                  | Vv1rg0172          | .                  | .                  | .                  | . | .      | . |
| .                  | .                  | .                  | .                  | .                  | . | .      | . |
| Vv17g0654          | Tc03_g010220       | .                  | .                  | .                  | . | .      | . |
| Vv14g1601          | .                  | .                  | .                  | Gorai.007G036700.1 | . | .      | . |
| .                  | .                  | .                  | .                  | .                  | . | .      | . |
| Vv17g0655          | Tc03_g010230       | .                  | .                  | .                  | . | Gorai. | . |
| 008G192300.1       | .                  | .                  | .                  | .                  | . | .      | . |
| .                  | .                  | .                  | .                  | .                  | . | .      | . |
| Vv17g0656          | Tc03_g010240       | Gorai.001G072200.1 | .                  | .                  | . | .      | . |
| Gorai.007G036800.1 | Gorai.008G181600.1 | .                  | .                  | .                  | . | .      | . |
| .                  | .                  | .                  | .                  | Vv1rg0171          | . | .      | . |
| .                  | .                  | .                  | .                  | .                  | . | .      | . |
| Vv17g0657          | .                  | .                  | .                  | .                  | . | .      | . |
| .                  | .                  | .                  | .                  | .                  | . | .      | . |
| Vv17g0658          | Tc03_g010320       | Gorai.001G071900.1 | .                  | .                  | . | .      | . |
| Gorai.008G192500.1 | .                  | .                  | .                  | .                  | . | .      | . |
| .                  | .                  | Vv1rg0157          | .                  | .                  | . | .      | . |
| .                  | .                  | .                  | .                  | .                  | . | .      | . |
| Vv17g0659          | Tc03_g010330       | Gorai.001G071800.1 | .                  | .                  | . | .      | . |
| .                  | .                  | .                  | .                  | .                  | . | .      | . |

|                    |                    |   |   |   |        |   |
|--------------------|--------------------|---|---|---|--------|---|
| .                  | Vv1rg0156          | . | . | . | .      | . |
| .                  |                    | . | . | . | .      | . |
| Vv17g0660          |                    | . | . | . | .      | . |
| .                  |                    | . | . | . | .      | . |
| Vv17g0661          | Tc03_g010340       | . | . | . | .      | . |
| .                  |                    | . | . | . | .      | . |
| Vv17g0662          |                    | . | . | . | .      | . |
| .                  |                    | . | . | . | .      | . |
| Vv17g0663          |                    | . | . | . | .      | . |
| .                  |                    | . | . | . | .      | . |
| Vv17g0664          |                    | . | . | . | .      | . |
| .                  |                    | . | . | . | .      | . |
| Vv17g0665          | Tc03_g010380       | . | . | . | .      | . |
| .                  |                    | . | . | . | .      | . |
| Vv17g0666          | Gorai.001G069500.1 | . | . | . | .      | . |
| .                  |                    | . | . | . | .      | . |
| Vv17g0667          | Tc03_g010390       | . | . | . | .      | . |
| .                  |                    | . | . | . | .      | . |
| Vv17g0668          |                    | . | . | . | .      | . |
| .                  |                    | . | . | . | .      | . |
| Vv17g0669          | Tc03_g010400       | . | . | . | .      | . |
| .                  |                    | . | . | . | .      | . |
| Vv17g0670          |                    | . | . | . | Gorai. | . |
| 006G178700.1       |                    | . | . | . | .      | . |
| .                  |                    | . | . | . | .      | . |
| Vv17g0671          |                    | . | . | . | .      | . |
| .                  |                    | . | . | . | .      | . |
| Vv17g0672          | Tc03_g010420       | . | . | . | .      | . |
| Gorai.006G178600.1 |                    | . | . | . | .      | . |
| .                  |                    | . | . | . | .      | . |
| Vv17g0673          | Tc03_g010430       | . | . | . | .      | . |
| Gorai.006G178400.1 |                    | . | . | . | .      | . |
| .                  |                    | . | . | . | .      | . |
| Vv17g0674          |                    | . | . | . | .      | . |
| .                  |                    | . | . | . | .      | . |
| Vv17g0675          |                    | . | . | . | .      | . |
| .                  |                    | . | . | . | .      | . |
| .                  |                    | . | . | . | .      | . |

|              |                    |   |                    |   |                    |   |   |
|--------------|--------------------|---|--------------------|---|--------------------|---|---|
| Vv17g0676    | .                  | . | .                  | . | .                  | . | . |
| .            | .                  | . | .                  | . | .                  | . | . |
| Vv17g0677    | .                  | . | .                  | . | .                  | . | . |
| .            | .                  | . | .                  | . | .                  | . | . |
| Vv17g0678    | Tc03_g010450       | . | .                  | . | .                  | . | . |
| .            | .                  | . | .                  | . | .                  | . | . |
| Vv17g0679    | Tc03_g010460       | . | .                  | . | .                  | . | . |
| .            | .                  | . | .                  | . | .                  | . | . |
| Vv17g0680    | .                  | . | .                  | . | .                  | . | . |
| .            | .                  | . | .                  | . | .                  | . | . |
| Vv17g0681    | .                  | . | .                  | . | .                  | . | . |
| Vv14g1631    | .                  | . | Gorai.001G239100.1 | . | Gorai.             | . | . |
| 007G037300.1 | .                  | . | Vv1rg0138          | . | .                  | . | . |
| .            | .                  | . | .                  | . | .                  | . | . |
| Vv17g0682    | .                  | . | .                  | . | .                  | . | . |
| .            | .                  | . | .                  | . | .                  | . | . |
| Vv17g0683    | Tc03_g024750       | . | .                  | . | .                  | . | . |
| .            | .                  | . | .                  | . | .                  | . | . |
| Vv17g0684    | .                  | . | .                  | . | Gorai.008G181000.1 | . | . |
| .            | .                  | . | .                  | . | .                  | . | . |
| Vv1rg0135    | .                  | . | .                  | . | .                  | . | . |
| Vv17g0685    | .                  | . | .                  | . | .                  | . | . |
| .            | .                  | . | .                  | . | .                  | . | . |
| Vv17g0686    | Tc03_g024920       | . | .                  | . | Gorai.             | . | . |
| 008G193400.1 | Gorai.006G266900.1 | . | .                  | . | .                  | . | . |
| .            | .                  | . | .                  | . | .                  | . | . |
| Vv17g0687    | .                  | . | .                  | . | .                  | . | . |
| .            | .                  | . | .                  | . | .                  | . | . |
| Vv17g0688    | Tc03_g025210       | . | .                  | . | .                  | . | . |
| Vv14g1640    | .                  | . | .                  | . | .                  | . | . |
| .            | .                  | . | .                  | . | .                  | . | . |
| Vv17g0689    | .                  | . | .                  | . | .                  | . | . |
| .            | .                  | . | .                  | . | .                  | . | . |
| Vv17g0690    | .                  | . | .                  | . | .                  | . | . |
| .            | .                  | . | .                  | . | .                  | . | . |
| Vv17g0691    | .                  | . | .                  | . | .                  | . | . |
| .            | .                  | . | .                  | . | .                  | . | . |
| .            | .                  | . | .                  | . | .                  | . | . |



|              |                    |              |   |                    |                    |   |   |
|--------------|--------------------|--------------|---|--------------------|--------------------|---|---|
| Vv17g0692    | .                  | .            | . | .                  | .                  | . | . |
| .            | .                  | .            | . | .                  | .                  | . | . |
| Vv17g0693    | .                  | .            | . | .                  | .                  | . | . |
| Vv14g1654    | Tc05_g004730       | .            | . | Gorai.007G079300.1 | .                  | . | . |
|              | Gorai.006G015500.1 | .            | . | Vv1rg0123          | .                  | . | . |
| .            | .                  | .            | . | .                  | .                  | . | . |
| Vv17g0694    | Tc03_g010570       | .            | . | .                  | Gorai.             | . | . |
| 008G193800.1 | .                  | .            | . | .                  | .                  | . | . |
| .            | .                  | .            | . | .                  | .                  | . | . |
| Vv17g0695    | .                  | .            | . | .                  | .                  | . | . |
| .            | .                  | .            | . | .                  | .                  | . | . |
| Vv17g0696    | .                  | .            | . | .                  | .                  | . | . |
| .            | .                  | .            | . | .                  | .                  | . | . |
| Vv17g0697    | .                  | .            | . | .                  | .                  | . | . |
| .            | .                  | .            | . | .                  | .                  | . | . |
| Vv17g0698    | .                  | .            | . | .                  | Gorai.008G194000.1 | . | . |
| .            | .                  | .            | . | .                  | .                  | . | . |
| .            | .                  | .            | . | .                  | .                  | . | . |
| Vv17g0699    | .                  | .            | . | .                  | Gorai.008G194200.1 | . | . |
| .            | Vv14g1658          | Tc04_g009150 | . | Gorai.             | .                  | . | . |
| 001G239700.1 | Gorai.006G015100.1 | .            | . | Vv1rg0119          | .                  | . | . |
| .            | .                  | .            | . | .                  | .                  | . | . |
| Vv17g0700    | .                  | .            | . | .                  | .                  | . | . |
| .            | .                  | .            | . | .                  | .                  | . | . |
| Vv17g0701    | .                  | .            | . | .                  | Gorai.008G194300.1 | . | . |
| .            | .                  | .            | . | .                  | .                  | . | . |
| Vv17g0702    | .                  | .            | . | .                  | .                  | . | . |
| .            | .                  | .            | . | .                  | .                  | . | . |
| Vv17g0703    | .                  | .            | . | .                  | Gorai.008G180100.1 | . | . |
| .            | .                  | .            | . | .                  | .                  | . | . |
|              | Vv1rg0110          | .            | . | .                  | .                  | . | . |
| Vv17g0704    | .                  | .            | . | .                  | .                  | . | . |
| .            | .                  | .            | . | .                  | .                  | . | . |
| Vv17g0705    | Tc03_g025530       | .            | . | Gorai.007G017500.1 | .                  | . | . |
| .            | .                  | .            | . | .                  | .                  | . | . |
| Vv17g0706    | Tc03_g025710       | .            | . | .                  | .                  | . | . |
| .            | .                  | .            | . | .                  | .                  | . | . |
| Vv17g0707    | .                  | .            | . | .                  | .                  | . | . |
| .            | .                  | .            | . | .                  | .                  | . | . |
| .            | .                  | .            | . | .                  | .                  | . | . |

|                    |                    |                    |   |   |   |                    |   |
|--------------------|--------------------|--------------------|---|---|---|--------------------|---|
| Vv17g0708          | .                  | .                  | . | . | . | .                  | . |
| .                  | .                  | .                  | . | . | . | .                  | . |
| Vv17g0709          | .                  | .                  | . | . | . | .                  | . |
| .                  | .                  | .                  | . | . | . | .                  | . |
| Vv17g0710          | .                  | .                  | . | . | . | Gorai.008G194500.1 | . |
| .                  | .                  | .                  | . | . | . | .                  | . |
| Vv17g0711          | .                  | .                  | . | . | . | .                  | . |
| .                  | .                  | .                  | . | . | . | .                  | . |
| Vv17g0712          | .                  | .                  | . | . | . | .                  | . |
| .                  | .                  | .                  | . | . | . | .                  | . |
| Vv17g0713          | .                  | .                  | . | . | . | .                  | . |
| .                  | .                  | .                  | . | . | . | .                  | . |
| Vv17g0714          | .                  | .                  | . | . | . | .                  | . |
| .                  | .                  | .                  | . | . | . | .                  | . |
| Vv17g0715          | .                  | .                  | . | . | . | .                  | . |
| .                  | .                  | .                  | . | . | . | .                  | . |
| Vv17g0716          | .                  | .                  | . | . | . | .                  | . |
| .                  | .                  | .                  | . | . | . | .                  | . |
| Vv17g0717          | .                  | .                  | . | . | . | .                  | . |
| .                  | .                  | .                  | . | . | . | .                  | . |
| Vv17g0718          | .                  | .                  | . | . | . | .                  | . |
| .                  | .                  | .                  | . | . | . | .                  | . |
| Vv17g0719          | .                  | .                  | . | . | . | .                  | . |
| .                  | .                  | .                  | . | . | . | .                  | . |
| Vv17g0720          | .                  | .                  | . | . | . | .                  | . |
| .                  | .                  | .                  | . | . | . | .                  | . |
| Vv17g0721          | Tc03_g027750       | .                  | . | . | . | .                  | . |
| Gorai.006G177800.1 | .                  | .                  | . | . | . | .                  | . |
| .                  | .                  | .                  | . | . | . | .                  | . |
| Vv17g0722          | .                  | .                  | . | . | . | Gorai.008G179200.1 | . |
| .                  | Vv14g1680          | Tc04_g009620       | . | . | . | Gorai.             | . |
| 001G240900.1       | Gorai.007G038300.1 | .                  | . | . | . | Gorai.012G051800.1 | . |
| .                  | .                  | .                  | . | . | . | .                  | . |
| Vv17g0723          | .                  | .                  | . | . | . | Gorai.008G195000.1 | . |
| .                  | .                  | .                  | . | . | . | .                  | . |
| Vv17g0724          | Tc03_g010620       | Gorai.001G079100.1 | . | . | . | .                  | . |

|                    |              |                    |   |   |   |                    |   |
|--------------------|--------------|--------------------|---|---|---|--------------------|---|
| .                  | .            | .                  | . | . | . | .                  | . |
| .                  | .            | .                  | . | . | . | .                  | . |
| Vv17g0725          | Tc03_g010630 | .                  | . | . | . | .                  | . |
| .                  | .            | .                  | . | . | . | .                  | . |
| .                  | .            | .                  | . | . | . | .                  | . |
| Vv17g0726          | .            | Gorai.001G079000.1 | . | . | . | .                  | . |
| Gorai.008G195500.1 | .            | .                  | . | . | . | .                  | . |
| .                  | .            | .                  | . | . | . | .                  | . |
| .                  | .            | .                  | . | . | . | .                  | . |
| Vv17g0727          | .            | .                  | . | . | . | Gorai.             | . |
| 006G267200.1       | .            | .                  | . | . | . | .                  | . |
| .                  | .            | .                  | . | . | . | .                  | . |
| Vv17g0728          | .            | Gorai.001G078900.1 | . | . | . | .                  | . |
| Gorai.008G195600.1 | .            | .                  | . | . | . | .                  | . |
| .                  | .            | .                  | . | . | . | .                  | . |
| .                  | .            | .                  | . | . | . | .                  | . |
| Vv17g0729          | .            | .                  | . | . | . | .                  | . |
| .                  | .            | .                  | . | . | . | .                  | . |
| .                  | .            | .                  | . | . | . | .                  | . |
| Vv17g0730          | Tc03_g027590 | .                  | . | . | . | .                  | . |
| .                  | .            | .                  | . | . | . | .                  | . |
| .                  | .            | .                  | . | . | . | .                  | . |
| Vv17g0731          | .            | .                  | . | . | . | Gorai.008G195700.1 | . |
| .                  | .            | .                  | . | . | . | .                  | . |
| .                  | .            | .                  | . | . | . | .                  | . |
| Vv17g0732          | .            | Gorai.001G078800.1 | . | . | . | .                  | . |
| Gorai.008G178700.1 | .            | Gorai.006G267400.1 | . | . | . | .                  | . |
| .                  | .            | .                  | . | . | . | .                  | . |
| .                  | .            | .                  | . | . | . | .                  | . |
| Vv17g0733          | .            | .                  | . | . | . | .                  | . |
| .                  | .            | .                  | . | . | . | .                  | . |
| .                  | .            | .                  | . | . | . | .                  | . |
| Vv17g0734          | .            | .                  | . | . | . | .                  | . |
| .                  | .            | .                  | . | . | . | .                  | . |
| .                  | .            | .                  | . | . | . | .                  | . |
| Vv17g0735          | .            | .                  | . | . | . | .                  | . |
| .                  | .            | .                  | . | . | . | .                  | . |
| .                  | .            | .                  | . | . | . | .                  | . |
| Vv17g0736          | .            | .                  | . | . | . | .                  | . |
| .                  | .            | .                  | . | . | . | .                  | . |
| .                  | .            | .                  | . | . | . | .                  | . |
| Vv17g0737          | .            | .                  | . | . | . | .                  | . |
| .                  | .            | .                  | . | . | . | .                  | . |
| .                  | .            | .                  | . | . | . | .                  | . |
| Vv17g0738          | .            | .                  | . | . | . | .                  | . |
| .                  | .            | .                  | . | . | . | .                  | . |
| .                  | .            | .                  | . | . | . | .                  | . |
| Vv17g0739          | .            | Gorai.001G078700.1 | . | . | . | .                  | . |
| .                  | .            | .                  | . | . | . | .                  | . |
| .                  | .            | .                  | . | . | . | .                  | . |

|                    |                    |                    |   |   |                    |   |
|--------------------|--------------------|--------------------|---|---|--------------------|---|
| Vv17g0740          | Tc03_g011010       | .                  | . | . | .                  | . |
| .                  | .                  | .                  | . | . | .                  | . |
| Vv17g0741          | .                  | .                  | . | . | .                  | . |
| .                  | .                  | .                  | . | . | .                  | . |
| Vv17g0742          | .                  | .                  | . | . | .                  | . |
| .                  | .                  | .                  | . | . | .                  | . |
| Vv17g0743          | .                  | .                  | . | . | Gorai.008G196200.1 | . |
| .                  | .                  | .                  | . | . | .                  | . |
| Vv17g0744          | .                  | .                  | . | . | .                  | . |
| .                  | .                  | .                  | . | . | .                  | . |
| Vv17g0745          | .                  | .                  | . | . | .                  | . |
| .                  | .                  | .                  | . | . | .                  | . |
| Vv17g0746          | .                  | .                  | . | . | .                  | . |
| Vv14g1705          | Tc04_g010070       | .                  | . | . | Gorai.             | . |
| 006G012200.1       | Gorai.012G050300.1 | .                  | . | . | .                  | . |
| .                  | .                  | .                  | . | . | .                  | . |
| Vv17g0747          | .                  | .                  | . | . | Gorai.008G178000.1 | . |
| .                  | .                  | .                  | . | . | .                  | . |
| Vv17g0748          | .                  | .                  | . | . | .                  | . |
| .                  | .                  | .                  | . | . | .                  | . |
| Vv17g0749          | .                  | Gorai.001G078200.1 | . | . | .                  | . |
| .                  | Vv14g1717          | Tc04_g010180       | . | . | .                  | . |
| .                  | .                  | .                  | . | . | .                  | . |
| Vv17g0750          | .                  | .                  | . | . | .                  | . |
| .                  | .                  | .                  | . | . | .                  | . |
| Vv17g0751          | .                  | Gorai.001G078100.1 | . | . | .                  | . |
| Gorai.008G196700.1 | .                  | .                  | . | . | .                  | . |
| .                  | .                  | .                  | . | . | .                  | . |
| Vv17g0752          | .                  | .                  | . | . | .                  | . |
| .                  | .                  | .                  | . | . | .                  | . |
| Vv17g0753          | .                  | .                  | . | . | Gorai.             | . |
| 006G267500.1       | .                  | .                  | . | . | .                  | . |
| .                  | .                  | .                  | . | . | .                  | . |
| Vv17g0754          | Tc03_g011510       | .                  | . | . | .                  | . |
| .                  | .                  | .                  | . | . | .                  | . |
| Vv17g0755          | .                  | .                  | . | . | .                  | . |
| .                  | .                  | .                  | . | . | .                  | . |

|                    |                    |                    |   |   |   |        |   |
|--------------------|--------------------|--------------------|---|---|---|--------|---|
| Vv17g0756          | .                  | .                  | . | . | . | .      | . |
| .                  | .                  | .                  | . | . | . | .      | . |
| Vv17g0757          | .                  | .                  | . | . | . | .      | . |
| .                  | .                  | .                  | . | . | . | .      | . |
| Vv17g0758          | .                  | .                  | . | . | . | .      | . |
| .                  | .                  | .                  | . | . | . | .      | . |
| Vv17g0759          | .                  | .                  | . | . | . | .      | . |
| .                  | .                  | .                  | . | . | . | .      | . |
| Vv17g0760          | Tc03_g011590       | .                  | . | . | . | Gorai. | . |
| 008G197100.1       | Gorai.006G267600.1 | .                  | . | . | . | .      | . |
| .                  | .                  | .                  | . | . | . | .      | . |
| Vv17g0761          | .                  | .                  | . | . | . | .      | . |
| .                  | .                  | .                  | . | . | . | .      | . |
| Vv17g0762          | .                  | .                  | . | . | . | .      | . |
| .                  | .                  | .                  | . | . | . | .      | . |
| Vv17g0763          | Tc03_g011600       | .                  | . | . | . | Gorai. | . |
| 008G197200.1       | .                  | .                  | . | . | . | .      | . |
| .                  | .                  | .                  | . | . | . | .      | . |
| Vv17g0764          | Tc03_g011610       | Gorai.001G077900.1 | . | . | . | .      | . |
| Gorai.008G177900.1 | .                  | Vv14g1720          | . | . | . | .      | . |
| Tc04_g010210       | .                  | Gorai.007G081800.1 | . | . | . | .      | . |
| .                  | .                  | .                  | . | . | . | .      | . |
| Vv17g0765          | Tc03_g011640       | Gorai.001G077800.1 | . | . | . | .      | . |
| Gorai.008G197400.1 | .                  | .                  | . | . | . | .      | . |
| .                  | .                  | .                  | . | . | . | .      | . |
| .                  | .                  | .                  | . | . | . | .      | . |
| Vv17g0766          | Tc03_g011650       | .                  | . | . | . | .      | . |
| Gorai.006G267700.1 | .                  | .                  | . | . | . | .      | . |
| .                  | .                  | .                  | . | . | . | .      | . |
| Vv17g0767          | Tc03_g011700       | .                  | . | . | . | Gorai. | . |
| 008G197500.1       | Gorai.006G267800.1 | .                  | . | . | . | .      | . |
| .                  | .                  | .                  | . | . | . | .      | . |
| .                  | .                  | .                  | . | . | . | .      | . |
| Vv17g0768          | .                  | .                  | . | . | . | .      | . |
| .                  | .                  | .                  | . | . | . | .      | . |
| Vv17g0769          | .                  | .                  | . | . | . | .      | . |
| .                  | .                  | .                  | . | . | . | .      | . |
| .                  | .                  | .                  | . | . | . | .      | . |
| Vv17g0770          | .                  | .                  | . | . | . | .      | . |
| .                  | .                  | .                  | . | . | . | .      | . |
| .                  | .                  | .                  | . | . | . | .      | . |

|              |              |   |   |   |   |        |   |
|--------------|--------------|---|---|---|---|--------|---|
| Vv17g0771    | .            | . | . | . | . | .      | . |
| .            | .            | . | . | . | . | .      | . |
| .            | .            | . | . | . | . | .      | . |
| Vv17g0772    | Tc03_g011720 | . | . | . | . | Gorai. | . |
| 008G197700.1 | .            | . | . | . | . | .      | . |
| .            | .            | . | . | . | . | .      | . |
| Vv17g0773    | Tc03_g011770 | . | . | . | . | Gorai. | . |
| 008G197800.1 | .            | . | . | . | . | .      | . |
| .            | .            | . | . | . | . | .      | . |
| Vv17g0774    | .            | . | . | . | . | .      | . |
| .            | .            | . | . | . | . | .      | . |
| .            | .            | . | . | . | . | .      | . |
| Vv17g0775    | .            | . | . | . | . | .      | . |
| .            | .            | . | . | . | . | .      | . |
| .            | .            | . | . | . | . | .      | . |
| Vv17g0776    | .            | . | . | . | . | .      | . |
| .            | .            | . | . | . | . | .      | . |
| .            | .            | . | . | . | . | .      | . |
| Vv17g0777    | .            | . | . | . | . | .      | . |
| .            | .            | . | . | . | . | .      | . |
| .            | .            | . | . | . | . | .      | . |
| Vv17g0778    | .            | . | . | . | . | .      | . |
| .            | .            | . | . | . | . | .      | . |
| .            | .            | . | . | . | . | .      | . |
| Vv17g0779    | .            | . | . | . | . | .      | . |
| .            | .            | . | . | . | . | .      | . |
| .            | .            | . | . | . | . | .      | . |
| Vv17g0780    | .            | . | . | . | . | .      | . |
| .            | .            | . | . | . | . | .      | . |
| .            | .            | . | . | . | . | .      | . |
| Vv17g0781    | Tc03_g000570 | . | . | . | . | .      | . |
| .            | .            | . | . | . | . | .      | . |
| .            | .            | . | . | . | . | .      | . |
| Vv17g0782    | .            | . | . | . | . | .      | . |
| .            | .            | . | . | . | . | .      | . |
| .            | .            | . | . | . | . | .      | . |
| Vv17g0783    | .            | . | . | . | . | .      | . |
| .            | .            | . | . | . | . | .      | . |
| .            | .            | . | . | . | . | .      | . |
| Vv17g0784    | .            | . | . | . | . | .      | . |
| .            | .            | . | . | . | . | .      | . |
| .            | .            | . | . | . | . | .      | . |
| Vv17g0785    | .            | . | . | . | . | .      | . |
| .            | .            | . | . | . | . | .      | . |
| .            | .            | . | . | . | . | .      | . |
| Vv17g0786    | .            | . | . | . | . | .      | . |
| .            | .            | . | . | . | . | .      | . |
| .            | .            | . | . | . | . | .      | . |
| Vv17g0787    | .            | . | . | . | . | .      | . |
| .            | .            | . | . | . | . | .      | . |

|                    |              |                    |   |   |                    |
|--------------------|--------------|--------------------|---|---|--------------------|
| Vv17g0788          | Tc03_g011830 | .                  | . | . | Gorai.             |
| 008G197900.1       | .            | .                  | . | . | .                  |
| Vv17g0789          | Tc03_g011840 | .                  | . | . | Gorai.007G039200.1 |
| .                  | .            | .                  | . | . | .                  |
| Vv17g0790          | Tc03_g011850 | .                  | . | . | .                  |
| .                  | .            | .                  | . | . | .                  |
| Vv17g0791          | .            | .                  | . | . | .                  |
| .                  | .            | .                  | . | . | .                  |
| Vv17g0792          | .            | .                  | . | . | .                  |
| .                  | .            | .                  | . | . | .                  |
| Vv17g0793          | Tc03_g011860 | .                  | . | . | .                  |
| Gorai.006G268000.1 | .            | .                  | . | . | .                  |
| Vv17g0794          | .            | .                  | . | . | Gorai.008G198000.1 |
| .                  | .            | .                  | . | . | .                  |
| Vv17g0795          | .            | .                  | . | . | Gorai.008G198100.1 |
| .                  | .            | .                  | . | . | .                  |
| Vv17g0796          | .            | .                  | . | . | .                  |
| .                  | .            | .                  | . | . | .                  |
| Vv17g0797          | .            | .                  | . | . | .                  |
| .                  | .            | .                  | . | . | .                  |
| Vv17g0798          | .            | Gorai.001G077600.1 | . | . | .                  |
| .                  | Vv11g0846    | .                  | . | . | Gorai.             |
| 004G272800.1       | .            | .                  | . | . | .                  |
| Vv17g0799          | .            | .                  | . | . | .                  |
| .                  | .            | .                  | . | . | .                  |
| Vv17g0800          | Tc03_g011930 | .                  | . | . | Gorai.             |
| 008G198200.1       | .            | .                  | . | . | .                  |
| Vv17g0801          | .            | .                  | . | . | .                  |
| .                  | .            | .                  | . | . | .                  |
| Vv17g0802          | .            | .                  | . | . | .                  |
| .                  | .            | .                  | . | . | .                  |
| Vv17g0803          | .            | .                  | . | . | .                  |
| .                  | .            | .                  | . | . | .                  |
| .                  | .            | .                  | . | . | .                  |

|                    |                    |                    |                    |        |
|--------------------|--------------------|--------------------|--------------------|--------|
| Vv17g0804          | Tc03_g011980       | .                  | .                  | Gorai. |
| 008G198400.1       | Vv11g0853          | Tc09_g021760       | .                  | .      |
| .                  | .                  | .                  | .                  | .      |
| Vv17g0805          | .                  | .                  | .                  | .      |
| .                  | .                  | .                  | .                  | .      |
| Vv17g0806          | .                  | .                  | Gorai.008G177700.1 | .      |
| .                  | .                  | .                  | .                  | .      |
| Vv17g0807          | .                  | .                  | .                  | .      |
| .                  | .                  | .                  | .                  | .      |
| Vv17g0808          | .                  | .                  | .                  | .      |
| .                  | .                  | .                  | .                  | .      |
| Vv17g0809          | .                  | .                  | .                  | .      |
| .                  | .                  | .                  | .                  | .      |
| Vv17g0810          | .                  | .                  | .                  | .      |
| .                  | .                  | .                  | .                  | .      |
| Vv17g0811          | Tc03_g012060       | .                  | .                  | Gorai. |
| 008G175000.1       | .                  | .                  | .                  | .      |
| .                  | .                  | .                  | .                  | .      |
| Vv17g0812          | Tc03_g012080       | .                  | .                  | Gorai. |
| 008G198900.1       | .                  | .                  | .                  | .      |
| .                  | .                  | .                  | .                  | .      |
| Vv17g0813          | Tc03_g012100       | Gorai.001G077400.1 | .                  | .      |
| Gorai.008G199000.1 | .                  | .                  | .                  | .      |
| .                  | .                  | .                  | .                  | .      |
| Vv17g0814          | Tc03_g012130       | Gorai.001G077300.1 | .                  | .      |
| .                  | .                  | .                  | .                  | .      |
| Vv17g0815          | Tc03_g012140       | Gorai.001G077200.1 | .                  | .      |
| Gorai.008G199200.1 | .                  | .                  | .                  | .      |
| .                  | .                  | .                  | .                  | .      |
| Vv17g0816          | Tc03_g012150       | .                  | Gorai.007G039400.1 | .      |
| .                  | .                  | .                  | .                  | .      |
| Vv17g0817          | .                  | Gorai.001G077100.1 | .                  | .      |
| .                  | .                  | .                  | .                  | .      |
| Vv17g0818          | Tc03_g012160       | .                  | .                  | Gorai. |
| 008G199300.1       | Gorai.006G268100.1 | .                  | .                  | .      |
| .                  | .                  | .                  | .                  | .      |
| Vv17g0819          | .                  | .                  | .                  | .      |



|              |              |                    |                    |        |   |   |
|--------------|--------------|--------------------|--------------------|--------|---|---|
| .            | .            | .                  | .                  | .      | . | . |
| .            | .            | .                  | .                  | .      | . | . |
| Vv17g0820    | Tc03_g000280 | .                  | .                  | .      | . | . |
| Vv14g1467    | .            | .                  | .                  | .      | . | . |
| .            | .            | .                  | .                  | .      | . | . |
| Vv17g0821    | .            | .                  | .                  | .      | . | . |
| Vv14g1470    | .            | .                  | Gorai.001G259500.1 | .      | . | . |
| .            | .            | .                  | .                  | .      | . | . |
| Vv17g0822    | .            | .                  | .                  | .      | . | . |
| .            | .            | .                  | .                  | .      | . | . |
| .            | .            | .                  | .                  | .      | . | . |
| Vv17g0823    | .            | .                  | .                  | .      | . | . |
| Vv14g1472    | .            | .                  | .                  | .      | . | . |
| .            | .            | .                  | .                  | .      | . | . |
| Vv17g0824    | .            | .                  | .                  | .      | . | . |
| .            | .            | .                  | .                  | .      | . | . |
| .            | .            | .                  | .                  | .      | . | . |
| Vv17g0825    | .            | .                  | .                  | .      | . | . |
| Vv14g1471    | Tc04_g000350 | .                  | .                  | .      | . | . |
| .            | .            | .                  | .                  | .      | . | . |
| Vv17g0826    | .            | .                  | .                  | .      | . | . |
| .            | .            | .                  | .                  | .      | . | . |
| .            | .            | .                  | .                  | .      | . | . |
| Vv17g0827    | .            | .                  | .                  | .      | . | . |
| .            | .            | .                  | .                  | .      | . | . |
| .            | .            | .                  | .                  | .      | . | . |
| Vv17g0828    | .            | .                  | .                  | .      | . | . |
| Vv14g1470    | .            | .                  | Gorai.001G259500.1 | .      | . | . |
| .            | .            | .                  | .                  | .      | . | . |
| Vv17g0829    | .            | .                  | .                  | .      | . | . |
| .            | .            | .                  | .                  | .      | . | . |
| .            | .            | .                  | .                  | .      | . | . |
| Vv17g0830    | Tc03_g012200 | .                  | .                  | .      | . | . |
| .            | .            | .                  | .                  | .      | . | . |
| .            | .            | .                  | .                  | .      | . | . |
| Vv17g0831    | Tc03_g012210 | Gorai.001G076900.1 | .                  | .      | . | . |
| .            | .            | .                  | .                  | .      | . | . |
| .            | .            | .                  | .                  | .      | . | . |
| Vv17g0832    | Tc03_g000240 | .                  | .                  | .      | . | . |
| .            | .            | .                  | .                  | .      | . | . |
| Vv01g0885    | .            | Gorai.005G188000.1 | .                  | Gorai. | . | . |
| 009G345700.1 | .            | .                  | .                  | .      | . | . |
| Vv17g0833    | Tc03_g000230 | .                  | .                  | .      | . | . |
| .            | .            | .                  | .                  | .      | . | . |
| .            | .            | .                  | .                  | .      | . | . |
| Vv17g0834    | Tc03_g000220 | .                  | .                  | .      | . | . |
| .            | .            | .                  | .                  | .      | . | . |
| .            | .            | .                  | .                  | .      | . | . |
| Vv17g0835    | .            | .                  | .                  | .      | . | . |
| .            | .            | .                  | .                  | .      | . | . |

|                    |              |                    |   |   |   |           |   |
|--------------------|--------------|--------------------|---|---|---|-----------|---|
| Vv17g0836          | .            | .                  | . | . | . | .         | . |
| .                  | .            | .                  | . | . | . | .         | . |
| Vv17g0837          | .            | .                  | . | . | . | .         | . |
| .                  | .            | .                  | . | . | . | .         | . |
| Vv17g0838          | .            | Gorai.001G073900.1 | . | . | . | .         | . |
| .                  | .            | .                  | . | . | . | .         | . |
| Vv17g0839          | .            | .                  | . | . | . | .         | . |
| .                  | .            | .                  | . | . | . | Vv01g0883 | . |
| .                  | .            | Gorai.005G187800.1 | . | . | . | .         | . |
| Vv17g0840          | Tc03_g000270 | .                  | . | . | . | .         | . |
| Gorai.006G187300.1 | .            | .                  | . | . | . | .         | . |
| .                  | .            | .                  | . | . | . | .         | . |
| Vv17g0841          | Tc03_g000280 | .                  | . | . | . | .         | . |
| Vv14g1467          | .            | .                  | . | . | . | .         | . |
| .                  | .            | .                  | . | . | . | .         | . |
| Vv17g0842          | Tc03_g000300 | .                  | . | . | . | .         | . |
| .                  | .            | .                  | . | . | . | .         | . |
| Vv01g0876          | .            | Gorai.005G187300.1 | . | . | . | .         | . |
| .                  | .            | .                  | . | . | . | .         | . |
| Vv17g0843          | Tc03_g000310 | .                  | . | . | . | .         | . |
| Gorai.006G187400.1 | .            | .                  | . | . | . | .         | . |
| .                  | Vv01g0875    | .                  | . | . | . | .         | . |
| .                  | .            | .                  | . | . | . | .         | . |
| Vv17g0844          | .            | .                  | . | . | . | .         | . |
| .                  | .            | .                  | . | . | . | .         | . |
| .                  | .            | .                  | . | . | . | .         | . |
| Vv17g0845          | Tc03_g000320 | .                  | . | . | . | .         | . |
| .                  | .            | .                  | . | . | . | .         | . |
| .                  | .            | .                  | . | . | . | .         | . |
| Vv17g0846          | Tc03_g000330 | .                  | . | . | . | .         | . |
| .                  | .            | .                  | . | . | . | .         | . |
| .                  | .            | .                  | . | . | . | .         | . |
| Vv17g0847          | Tc03_g000350 | .                  | . | . | . | .         | . |
| .                  | .            | .                  | . | . | . | .         | . |
| .                  | .            | .                  | . | . | . | .         | . |
| Vv17g0848          | .            | .                  | . | . | . | .         | . |
| .                  | .            | .                  | . | . | . | .         | . |
| .                  | .            | .                  | . | . | . | .         | . |
| Vv17g0849          | .            | .                  | . | . | . | .         | . |
| .                  | .            | .                  | . | . | . | .         | . |
| .                  | .            | .                  | . | . | . | .         | . |
| Vv17g0850          | Tc03_g000360 | .                  | . | . | . | .         | . |
| .                  | .            | .                  | . | . | . | .         | . |
| .                  | .            | .                  | . | . | . | .         | . |
| Vv17g0851          | Tc03_g000370 | Gorai.001G071200.1 | . | . | . | .         | . |
| .                  | .            | .                  | . | . | . | .         | . |

|                    |              |           |   |                    |   |   |
|--------------------|--------------|-----------|---|--------------------|---|---|
| .                  | Vv01g0872    | .         | . | .                  | . | . |
| .                  | .            | .         | . | .                  | . | . |
| Vv17g0852          | Tc03_g000430 | .         | . | .                  | . | . |
| .                  | .            | .         | . | .                  | . | . |
| Vv17g0853          | .            | .         | . | .                  | . | . |
| .                  | .            | .         | . | .                  | . | . |
| Vv17g0854          | Tc03_g000470 | .         | . | .                  | . | . |
| .                  | .            | .         | . | .                  | . | . |
| Vv17g0855          | Tc03_g000480 | .         | . | .                  | . | . |
| .                  | .            | .         | . | .                  | . | . |
| Vv17g0856          | .            | .         | . | .                  | . | . |
| .                  | .            | .         | . | .                  | . | . |
| Vv17g0857          | .            | .         | . | Gorai.008G158300.1 | . | . |
| .                  | .            | .         | . | .                  | . | . |
| Vv01g0868          | .            | .         | . | .                  | . | . |
| Gorai.012G123100.1 | .            | .         | . | .                  | . | . |
| Vv17g0858          | Tc03_g000500 | .         | . | .                  | . | . |
| .                  | .            | .         | . | .                  | . | . |
| Vv17g0859          | Tc03_g000510 | .         | . | .                  | . | . |
| .                  | .            | .         | . | .                  | . | . |
| Vv17g0860          | Tc03_g000520 | .         | . | .                  | . | . |
| .                  | .            | .         | . | .                  | . | . |
| Vv17g0861          | Tc03_g000540 | .         | . | .                  | . | . |
| Gorai.006G187900.1 | .            | .         | . | .                  | . | . |
| .                  | .            | .         | . | .                  | . | . |
| Vv17g0862          | .            | .         | . | Gorai.             | . | . |
| 006G187800.1       | Vv14g1465    | .         | . | Gorai.001G259700.1 | . | . |
| .                  | .            | Vv01g0842 | . | .                  | . | . |
| .                  | .            | .         | . | .                  | . | . |
| Vv17g0863          | Tc03_g000550 | .         | . | Gorai.             | . | . |
| 008G201000.1       | .            | .         | . | .                  | . | . |
| .                  | .            | .         | . | .                  | . | . |
| Vv17g0864          | Tc03_g000570 | .         | . | .                  | . | . |
| .                  | .            | .         | . | .                  | . | . |
| Vv17g0865          | Tc03_g000580 | .         | . | .                  | . | . |
| .                  | .            | .         | . | .                  | . | . |
| Vv17g0866          | Tc03_g000590 | .         | . | .                  | . | . |
| .                  | .            | .         | . | .                  | . | . |
| Vv17g0867          | Tc03_g000600 | .         | . | .                  | . | . |

|                    |                    |                    |              |   |   |   |   |
|--------------------|--------------------|--------------------|--------------|---|---|---|---|
| .                  | .                  | .                  | .            | . | . | . | . |
| .                  | .                  | .                  | .            | . | . | . | . |
| Vv17g0868          | .                  | .                  | .            | . | . | . | . |
| .                  | .                  | .                  | .            | . | . | . | . |
| Vv17g0869          | .                  | .                  | .            | . | . | . | . |
| .                  | .                  | .                  | .            | . | . | . | . |
| Vv17g0870          | Tc03_g000610       | .                  | .            | . | . | . | . |
| .                  | .                  | .                  | .            | . | . | . | . |
| Vv17g0871          | Tc03_g000620       | .                  | .            | . | . | . | . |
| .                  | .                  | .                  | .            | . | . | . | . |
| Vv17g0872          | Tc03_g000640       | .                  | .            | . | . | . | . |
| .                  | .                  | .                  | .            | . | . | . | . |
| Vv17g0873          | Tc03_g000650       | .                  | .            | . | . | . | . |
| Gorai.006G187700.1 | Vv14g1455          | .                  | .            | . | . | . | . |
| .                  | Vv01g0824          | .                  | .            | . | . | . | . |
| .                  | .                  | .                  | .            | . | . | . | . |
| Vv17g0874          | Tc03_g000670       | .                  | .            | . | . | . | . |
| .                  | .                  | .                  | .            | . | . | . | . |
| Vv17g0875          | .                  | .                  | .            | . | . | . | . |
| .                  | .                  | .                  | .            | . | . | . | . |
| Vv17g0876          | Tc03_g000680       | Gorai.001G070400.1 | .            | . | . | . | . |
| .                  | Vv14g1448          | Tc04_g000500       | .            | . | . | . | . |
| .                  | Gorai.007G077100.1 | .                  | .            | . | . | . | . |
| .                  | .                  | .                  | .            | . | . | . | . |
| Vv17g0877          | Tc03_g000690       | .                  | .            | . | . | . | . |
| .                  | Vv14g1447          | Tc04_g000520       | .            | . | . | . | . |
| .                  | Gorai.012G059900.1 | Vv01g0821          | Tc02_g023300 | . | . | . | . |
| .                  | Gorai.005G184300.1 | .                  | .            | . | . | . | . |
| Vv17g0878          | .                  | .                  | .            | . | . | . | . |
| .                  | .                  | .                  | .            | . | . | . | . |
| .                  | .                  | .                  | .            | . | . | . | . |
| Vv17g0879          | Tc03_g000710       | .                  | .            | . | . | . | . |
| Gorai.006G188000.1 | Vv14g1446          | Tc04_g000550       | .            | . | . | . | . |
| .                  | Gorai.012G060000.1 | .                  | .            | . | . | . | . |
| .                  | .                  | .                  | .            | . | . | . | . |
| Vv17g0880          | .                  | .                  | .            | . | . | . | . |
| .                  | .                  | .                  | .            | . | . | . | . |
| .                  | .                  | .                  | .            | . | . | . | . |
| Vv17g0881          | .                  | .                  | .            | . | . | . | . |
| .                  | .                  | .                  | .            | . | . | . | . |
| .                  | .                  | .                  | .            | . | . | . | . |
| Vv17g0882          | Tc03_g000730       | .                  | .            | . | . | . | . |
| .                  | .                  | .                  | .            | . | . | . | . |

|                    |                    |                    |   |                    |   |        |   |
|--------------------|--------------------|--------------------|---|--------------------|---|--------|---|
| Vv01g0808          | .                  | .                  | . | .                  | . | .      | . |
| Vv17g0883          | .                  | .                  | . | .                  | . | .      | . |
| .                  | .                  | .                  | . | .                  | . | .      | . |
| .                  | .                  | .                  | . | .                  | . | .      | . |
| Vv17g0884          | .                  | .                  | . | .                  | . | .      | . |
| .                  | .                  | .                  | . | .                  | . | .      | . |
| .                  | .                  | .                  | . | .                  | . | .      | . |
| Vv17g0885          | Tc03_g000760       | Gorai.001G070300.1 | . | .                  | . | .      | . |
| .                  | Gorai.006G188200.1 | .                  | . | .                  | . | .      | . |
| .                  | .                  | .                  | . | .                  | . | .      | . |
| .                  | .                  | .                  | . | .                  | . | .      | . |
| Vv17g0886          | Tc03_g000770       | Gorai.001G070200.1 | . | .                  | . | .      | . |
| .                  | Gorai.006G188100.1 | .                  | . | .                  | . | .      | . |
| .                  | .                  | .                  | . | .                  | . | .      | . |
| .                  | .                  | .                  | . | .                  | . | .      | . |
| Vv17g0887          | Tc03_g000780       | .                  | . | .                  | . | .      | . |
| .                  | .                  | .                  | . | .                  | . | .      | . |
| .                  | .                  | .                  | . | .                  | . | .      | . |
| Vv17g0888          | Tc03_g000790       | .                  | . | .                  | . | .      | . |
| .                  | .                  | .                  | . | .                  | . | .      | . |
| .                  | .                  | .                  | . | .                  | . | .      | . |
| Vv17g0889          | Tc03_g000800       | .                  | . | .                  | . | .      | . |
| Vv14g1441          | Tc04_g000630       | .                  | . | .                  | . | Gorai. | . |
| 007G076900.1       | .                  | .                  | . | .                  | . | .      | . |
| .                  | .                  | .                  | . | .                  | . | .      | . |
| Vv17g0890          | .                  | .                  | . | .                  | . | .      | . |
| .                  | .                  | .                  | . | .                  | . | .      | . |
| .                  | .                  | .                  | . | .                  | . | .      | . |
| Vv17g0891          | Tc03_g000820       | .                  | . | .                  | . | .      | . |
| .                  | .                  | .                  | . | .                  | . | .      | . |
| Vv01g0807          | .                  | Gorai.005G183800.1 | . | .                  | . | .      | . |
| .                  | .                  | .                  | . | .                  | . | .      | . |
| Vv17g0892          | Tc03_g000830       | .                  | . | .                  | . | .      | . |
| .                  | .                  | .                  | . | .                  | . | .      | . |
| .                  | .                  | .                  | . | .                  | . | .      | . |
| Vv17g0893          | Tc03_g000880       | Gorai.001G068600.1 | . | .                  | . | .      | . |
| .                  | .                  | .                  | . | .                  | . | .      | . |
| .                  | Vv01g0802          | .                  | . | Gorai.005G183500.1 | . | .      | . |
| .                  | .                  | .                  | . | .                  | . | .      | . |
| Vv17g0894          | Tc03_g000890       | .                  | . | Gorai.007G002000.1 | . | .      | . |
| .                  | .                  | .                  | . | .                  | . | .      | . |
| .                  | .                  | .                  | . | .                  | . | .      | . |
| Vv17g0895          | .                  | .                  | . | .                  | . | Gorai. | . |
| 006G187100.1       | Vv14g1436          | Tc04_g000700       | . | .                  | . | .      | . |
| .                  | Gorai.012G060800.1 | .                  | . | .                  | . | .      | . |
| .                  | .                  | .                  | . | .                  | . | .      | . |
| Vv17g0896          | Tc03_g000920       | .                  | . | .                  | . | Gorai. | . |
| 008G158500.1       | Vv14g1435          | Tc04_g000710       | . | .                  | . | .      | . |
| Gorai.001G261100.1 | .                  | Vv01g0800          | . | .                  | . | .      | . |
| .                  | .                  | Gorai.008G155700.1 | . | .                  | . | .      | . |

|                    |              |                    |              |                    |        |   |
|--------------------|--------------|--------------------|--------------|--------------------|--------|---|
| Vv17g0897          | Tc03_g000930 | .                  | .            | .                  | .      | . |
| .                  | .            | .                  | .            | .                  | .      | . |
| Vv17g0898          | .            | .                  | .            | .                  | .      | . |
| Vv14g1433          | .            | .                  | .            | .                  | .      | . |
| .                  | .            | .                  | .            | .                  | .      | . |
| Vv17g0899          | .            | .                  | .            | .                  | Gorai. | . |
| 006G185400.1       | .            | .                  | .            | .                  | .      | . |
| .                  | .            | .                  | .            | .                  | .      | . |
| Vv17g0900          | .            | .                  | .            | .                  | .      | . |
| .                  | .            | .                  | .            | .                  | .      | . |
| .                  | .            | .                  | .            | .                  | .      | . |
| Vv17g0901          | Tc03_g000940 | .                  | .            | .                  | .      | . |
| Gorai.006G182700.1 | .            | .                  | .            | .                  | .      | . |
| .                  | .            | .                  | .            | .                  | .      | . |
| Vv17g0902          | .            | Gorai.001G068400.1 | .            | .                  | .      | . |
| .                  | .            | .                  | .            | .                  | .      | . |
| .                  | .            | .                  | .            | .                  | .      | . |
| Vv17g0903          | .            | .                  | .            | .                  | .      | . |
| .                  | .            | .                  | .            | .                  | .      | . |
| .                  | .            | .                  | .            | .                  | .      | . |
| Vv17g0904          | Tc03_g000950 | Gorai.001G068400.1 | .            | .                  | .      | . |
| .                  | .            | Vv14g1421          | Tc04_g000790 | .                  | .      | . |
| .                  | .            | Gorai.012G061200.1 | .            | .                  | .      | . |
| .                  | .            | .                  | .            | .                  | .      | . |
| Vv17g0905          | Tc03_g000960 | .                  | .            | .                  | .      | . |
| .                  | .            | .                  | .            | .                  | .      | . |
| .                  | .            | .                  | .            | .                  | .      | . |
| Vv17g0906          | Tc03_g000990 | .                  | .            | .                  | .      | . |
| .                  | .            | .                  | .            | .                  | .      | . |
| .                  | .            | .                  | .            | .                  | .      | . |
| Vv17g0907          | .            | .                  | .            | .                  | .      | . |
| .                  | .            | .                  | .            | .                  | .      | . |
| .                  | .            | .                  | .            | .                  | .      | . |
| Vv17g0908          | Tc03_g001010 | .                  | .            | .                  | .      | . |
| .                  | .            | .                  | .            | .                  | .      | . |
| Vv1rg0006          | .            | .                  | .            | .                  | .      | . |
| Vv17g0909          | .            | .                  | .            | .                  | .      | . |
| .                  | .            | .                  | .            | .                  | .      | . |
| .                  | .            | .                  | .            | .                  | .      | . |
| Vv17g0910          | .            | .                  | .            | .                  | .      | . |
| .                  | .            | .                  | .            | .                  | .      | . |
| .                  | .            | .                  | .            | .                  | .      | . |
| Vv17g0911          | .            | .                  | .            | .                  | .      | . |
| .                  | .            | .                  | .            | .                  | .      | . |
| .                  | .            | .                  | .            | .                  | .      | . |
| Vv17g0912          | .            | .                  | .            | .                  | .      | . |
| .                  | .            | .                  | .            | .                  | .      | . |
| .                  | .            | .                  | .            | .                  | .      | . |
| Vv17g0913          | Tc03_g001020 | .                  | .            | Gorai.007G001900.1 | .      | . |

|                    |                    |   |   |   |                    |        |   |
|--------------------|--------------------|---|---|---|--------------------|--------|---|
| .                  | .                  | . | . | . | .                  | .      | . |
| .                  | .                  | . | . | . | .                  | .      | . |
| Vv17g0914          | Tc03_g001030       | . | . | . | .                  | .      | . |
| .                  | .                  | . | . | . | .                  | .      | . |
| .                  | .                  | . | . | . | .                  | .      | . |
| Vv17g0915          | Tc03_g001040       | . | . | . | .                  | .      | . |
| .                  | .                  | . | . | . | .                  | .      | . |
| .                  | .                  | . | . | . | .                  | .      | . |
| Vv17g0916          | Tc03_g001050       | . | . | . | .                  | .      | . |
| Vv14g1410          | Tc04_g000880       | . | . | . | Gorai.001G261500.1 | .      | . |
| .                  | .                  | . | . | . | .                  | .      | . |
| .                  | .                  | . | . | . | .                  | .      | . |
| Vv17g0917          | .                  | . | . | . | .                  | .      | . |
| .                  | .                  | . | . | . | .                  | .      | . |
| .                  | .                  | . | . | . | .                  | .      | . |
| Vv17g0918          | Tc03_g001060       | . | . | . | .                  | .      | . |
| .                  | .                  | . | . | . | .                  | .      | . |
| .                  | .                  | . | . | . | .                  | .      | . |
| Vv17g0919          | .                  | . | . | . | .                  | .      | . |
| .                  | .                  | . | . | . | .                  | .      | . |
| .                  | .                  | . | . | . | .                  | .      | . |
| Vv17g0920          | .                  | . | . | . | .                  | .      | . |
| .                  | .                  | . | . | . | .                  | .      | . |
| .                  | .                  | . | . | . | .                  | .      | . |
| Vv17g0921          | .                  | . | . | . | .                  | .      | . |
| .                  | .                  | . | . | . | .                  | .      | . |
| .                  | .                  | . | . | . | .                  | .      | . |
| Vv17g0922          | Tc03_g001070       | . | . | . | .                  | .      | . |
| Vv14g1407          | Tc04_g000920       | . | . | . | .                  | .      | . |
| Gorai.006G030200.1 | Gorai.012G061500.1 | . | . | . | .                  | .      | . |
| .                  | .                  | . | . | . | .                  | .      | . |
| Vv17g0923          | Tc03_g001080       | . | . | . | .                  | .      | . |
| .                  | .                  | . | . | . | .                  | .      | . |
| .                  | .                  | . | . | . | .                  | .      | . |
| Vv17g0924          | .                  | . | . | . | .                  | .      | . |
| .                  | .                  | . | . | . | .                  | .      | . |
| .                  | .                  | . | . | . | .                  | .      | . |
| Vv17g0925          | .                  | . | . | . | .                  | .      | . |
| .                  | .                  | . | . | . | .                  | .      | . |
| .                  | .                  | . | . | . | .                  | .      | . |
| Vv17g0926          | .                  | . | . | . | .                  | .      | . |
| .                  | .                  | . | . | . | .                  | .      | . |
| .                  | .                  | . | . | . | .                  | .      | . |
| Vv17g0927          | .                  | . | . | . | .                  | .      | . |
| .                  | .                  | . | . | . | .                  | .      | . |
| .                  | .                  | . | . | . | .                  | .      | . |
| Vv17g0928          | .                  | . | . | . | .                  | .      | . |
| .                  | .                  | . | . | . | .                  | .      | . |
| .                  | .                  | . | . | . | .                  | .      | . |
| Vv17g0929          | .                  | . | . | . | .                  | Gorai. | . |

|              |                    |                    |   |   |   |        |   |
|--------------|--------------------|--------------------|---|---|---|--------|---|
| 006G189100.1 | .                  | .                  | . | . | . | .      | . |
| Vv17g0930    | Tc03_g029940       | .                  | . | . | . | Gorai. | . |
| 008G158900.1 | .                  | .                  | . | . | . | .      | . |
| Vv17g0931    | .                  | .                  | . | . | . | .      | . |
| Vv14g1397    | Tc04_g001000       | Gorai.011G095800.1 | . | . | . | Gorai. | . |
| 001G262600.1 | .                  | .                  | . | . | . | .      | . |
| Vv17g0932    | .                  | .                  | . | . | . | Gorai. | . |
| 006G189200.1 | .                  | .                  | . | . | . | .      | . |
| Vv17g0933    | .                  | .                  | . | . | . | .      | . |
| Vv17g0934    | Tc03_g030120       | .                  | . | . | . | .      | . |
| Vv17g0935    | .                  | .                  | . | . | . | .      | . |
| Vv17g0936    | .                  | .                  | . | . | . | .      | . |
| Vv17g0937    | Tc03_g001110       | .                  | . | . | . | .      | . |
| Vv1rg0021    | .                  | .                  | . | . | . | .      | . |
| Vv17g0938    | .                  | .                  | . | . | . | .      | . |
| Vv17g0939    | Tc03_g001120       | .                  | . | . | . | .      | . |
| Vv1rg0022    | .                  | .                  | . | . | . | .      | . |
| Vv17g0940    | Tc03_g001130       | .                  | . | . | . | .      | . |
| Vv17g0941    | .                  | .                  | . | . | . | .      | . |
| Vv17g0942    | .                  | .                  | . | . | . | .      | . |
| Vv17g0943    | Tc03_g001290       | .                  | . | . | . | .      | . |
| Vv14g1388    | Tc04_g001080       | Gorai.001G263100.1 | . | . | . | .      | . |
|              | Gorai.012G062600.1 | .                  | . | . | . | .      | . |
| Vv17g0944    | .                  | .                  | . | . | . | .      | . |
| Vv17g0945    | .                  | .                  | . | . | . | .      | . |



|              |                    |                    |                    |
|--------------|--------------------|--------------------|--------------------|
| Vv17g0946    | Tc03_g001300       |                    | Gorai.007G001600.1 |
| Vv17g0947    |                    |                    | Gorai.008G159500.1 |
| Vv17g0948    | Vv1rg0044          |                    |                    |
| Vv17g0949    |                    |                    |                    |
| Vv17g0950    | Tc03_g001330       |                    | Gorai.007G001500.1 |
| Vv17g0951    | Tc03_g001340       |                    |                    |
| Vv17g0952    | Tc03_g001350       |                    |                    |
| Vv17g0953    |                    | Gorai.001G071400.1 |                    |
| Vv17g0954    | Vv14g1375          |                    |                    |
| Vv17g0955    | Tc03_g001360       |                    |                    |
|              | Vv14g1374          | Tc04_g001310       |                    |
|              | Gorai.012G063100.1 |                    |                    |
| Vv17g0956    |                    |                    |                    |
| Vv17g0957    | Tc03_g001370       |                    | Gorai.             |
| 008G159600.1 | Vv1rg0062          |                    |                    |
| Vv17g0958    |                    |                    |                    |
| Vv17g0959    | Tc03_g001380       |                    |                    |
| Vv17g0960    | Tc03_g001390       |                    |                    |
|              | Vv14g1372          | Tc04_g001340       |                    |
|              | Vv1rg0067          |                    |                    |

|                    |              |                    |   |   |                    |           |   |
|--------------------|--------------|--------------------|---|---|--------------------|-----------|---|
| Vv17g0961          | .            | .                  | . | . | .                  | .         | . |
| .                  | .            | .                  | . | . | .                  | Vv1rg0068 | . |
| Vv17g0962          | Tc03_g001400 | .                  | . | . | .                  | .         | . |
| .                  | .            | .                  | . | . | .                  | .         | . |
| Vv17g0963          | Tc03_g001410 | .                  | . | . | .                  | .         | . |
| .                  | .            | .                  | . | . | .                  | .         | . |
| Vv17g0964          | Tc03_g001420 | .                  | . | . | .                  | .         | . |
| .                  | .            | .                  | . | . | .                  | .         | . |
| Vv17g0965          | Tc03_g001430 | Gorai.001G071500.1 | . | . | .                  | .         | . |
| .                  | .            | .                  | . | . | .                  | .         | . |
| Vv17g0966          | Tc03_g001440 | .                  | . | . | .                  | .         | . |
|                    | Vv14g1371    | .                  | . | . | .                  | .         | . |
| .                  | .            | .                  | . | . | .                  | .         | . |
| Vv17g0967          | Tc03_g001450 | .                  | . | . | .                  | .         | . |
|                    | Vv14g1370    | Tc04_g001350       | . | . | .                  | .         | . |
| Gorai.006G031800.1 | .            | .                  | . | . | .                  | .         | . |
| .                  | .            | .                  | . | . | .                  | .         | . |
| Vv17g0968          | Tc03_g001470 | .                  | . | . | .                  | .         | . |
| .                  | .            | .                  | . | . | .                  | .         | . |
| Vv17g0969          | Tc03_g001480 | .                  | . | . | .                  | .         | . |
| .                  | .            | .                  | . | . | .                  | .         | . |
| Vv17g0970          | .            | .                  | . | . | .                  | .         | . |
| .                  | .            | .                  | . | . | .                  | .         | . |
| Vv17g0971          | Tc03_g001490 | .                  | . | . | .                  | .         | . |
| .                  | .            | .                  | . | . | .                  | .         | . |
| Vv1rg0073          | .            | .                  | . | . | .                  | .         | . |
| Vv17g0972          | .            | .                  | . | . | .                  | .         | . |
| .                  | .            | .                  | . | . | .                  | .         | . |
| Vv17g0973          | Tc03_g001500 | .                  | . | . | Gorai.007G001400.1 | .         | . |
| .                  | .            | .                  | . | . | .                  | .         | . |
| Vv17g0974          | .            | .                  | . | . | .                  | .         | . |
| .                  | .            | .                  | . | . | .                  | .         | . |
| Vv17g0975          | Tc03_g001510 | .                  | . | . | .                  | .         | . |
| .                  | .            | .                  | . | . | .                  | .         | . |
| Vv17g0976          | .            | .                  | . | . | .                  | .         | . |
| .                  | .            | .                  | . | . | .                  | .         | . |
| Vv17g0977          | .            | .                  | . | . | .                  | .         | . |

|                    |              |   |   |   |                    |        |   |
|--------------------|--------------|---|---|---|--------------------|--------|---|
| .                  | .            | . | . | . | .                  | .      | . |
| .                  | .            | . | . | . | .                  | .      | . |
| Vv17g0978          | Tc03_g001550 | . | . | . | .                  | .      | . |
| Vv14g1361          | Tc04_g001420 | . | . | . | .                  | .      | . |
| .                  | .            | . | . | . | .                  | .      | . |
| Vv17g0979          | Tc03_g001650 | . | . | . | .                  | .      | . |
| .                  | .            | . | . | . | .                  | .      | . |
| Vv17g0980          | .            | . | . | . | .                  | .      | . |
| .                  | .            | . | . | . | .                  | .      | . |
| Vv17g0981          | Tc03_g001660 | . | . | . | .                  | .      | . |
| Gorai.006G190000.1 | .            | . | . | . | .                  | .      | . |
| .                  | .            | . | . | . | .                  | .      | . |
| Vv17g0982          | Tc03_g001680 | . | . | . | .                  | .      | . |
| .                  | .            | . | . | . | .                  | .      | . |
| Vv17g0983          | .            | . | . | . | .                  | .      | . |
| .                  | .            | . | . | . | .                  | .      | . |
| Vv17g0984          | Tc03_g001690 | . | . | . | .                  | Gorai. | . |
| 008G219700.1       | .            | . | . | . | .                  | .      | . |
| .                  | .            | . | . | . | .                  | .      | . |
| Vv17g0985          | Tc03_g001700 | . | . | . | .                  | .      | . |
| .                  | .            | . | . | . | .                  | .      | . |
| Vv1rg0088          | .            | . | . | . | .                  | .      | . |
| Vv17g0986          | .            | . | . | . | .                  | .      | . |
| .                  | .            | . | . | . | .                  | .      | . |
| Vv17g0987          | .            | . | . | . | .                  | .      | . |
| .                  | .            | . | . | . | .                  | .      | . |
| Vv17g0988          | .            | . | . | . | .                  | .      | . |
| .                  | .            | . | . | . | .                  | .      | . |
| Vv17g0989          | Tc03_g001710 | . | . | . | .                  | .      | . |
| .                  | .            | . | . | . | .                  | .      | . |
| Vv17g0990          | Tc03_g001720 | . | . | . | .                  | .      | . |
| .                  | .            | . | . | . | .                  | .      | . |
| Vv17g0991          | Tc03_g001730 | . | . | . | Gorai.007G001100.1 | .      | . |
| .                  | .            | . | . | . | .                  | .      | . |
| .                  | Vv1rg0091    | . | . | . | .                  | .      | . |
| .                  | .            | . | . | . | .                  | .      | . |
| Vv17g0992          | Tc03_g001740 | . | . | . | .                  | .      | . |
| .                  | .            | . | . | . | .                  | .      | . |
| Vv17g0993          | Tc03_g001750 | . | . | . | .                  | .      | . |
| .                  | .            | . | . | . | .                  | .      | . |

|                    |                    |                    |   |   |        |   |
|--------------------|--------------------|--------------------|---|---|--------|---|
| Vv17g0994          | Tc03_g009100       | .                  | . | . | .      | . |
| .                  | .                  | .                  | . | . | .      | . |
| Vv17g0995          | .                  | .                  | . | . | .      | . |
| .                  | .                  | .                  | . | . | .      | . |
| Vv17g0996          | .                  | .                  | . | . | .      | . |
| .                  | .                  | .                  | . | . | .      | . |
| Vv17g0997          | Gorai.001G072300.1 | .                  | . | . | .      | . |
| .                  | .                  | .                  | . | . | .      | . |
| Vv17g0998          | .                  | .                  | . | . | .      | . |
| .                  | .                  | .                  | . | . | .      | . |
| Vv17g0999          | .                  | .                  | . | . | .      | . |
| .                  | .                  | .                  | . | . | .      | . |
| Vv17g1000          | .                  | .                  | . | . | .      | . |
| .                  | .                  | .                  | . | . | .      | . |
| Vv17g1001          | .                  | .                  | . | . | .      | . |
| .                  | .                  | .                  | . | . | .      | . |
| Vv17g1002          | .                  | .                  | . | . | .      | . |
| .                  | .                  | .                  | . | . | .      | . |
| Vv17g1003          | .                  | .                  | . | . | .      | . |
| Vv14g1354          | Tc04_g001490       | .                  | . | . | .      | . |
| Gorai.012G063500.1 | .                  | .                  | . | . | .      | . |
| .                  | .                  | .                  | . | . | .      | . |
| Vv17g1004          | .                  | .                  | . | . | .      | . |
| .                  | .                  | .                  | . | . | .      | . |
| Vv17g1005          | Tc03_g008690       | .                  | . | . | .      | . |
| .                  | .                  | .                  | . | . | .      | . |
| Vv17g1006          | .                  | .                  | . | . | .      | . |
| .                  | .                  | .                  | . | . | .      | . |
| Vv17g1007          | Tc03_g001980       | .                  | . | . | .      | . |
| Vv14g1344          | Tc04_g001570       | .                  | . | . | Gorai. | . |
| 007G075700.1       | Gorai.006G033100.1 | Gorai.012G063800.1 | . | . | .      | . |
| .                  | .                  | .                  | . | . | .      | . |
| Vv17g1008          | .                  | .                  | . | . | .      | . |
| .                  | .                  | .                  | . | . | .      | . |
| Vv17g1009          | .                  | .                  | . | . | .      | . |
| .                  | .                  | .                  | . | . | .      | . |

|              |              |   |   |   |   |        |   |
|--------------|--------------|---|---|---|---|--------|---|
| Vv17g1010    | .            | . | . | . | . | .      | . |
| .            | .            | . | . | . | . | .      | . |
| Vv17g1011    | .            | . | . | . | . | .      | . |
| .            | .            | . | . | . | . | .      | . |
| Vv17g1012    | .            | . | . | . | . | .      | . |
| .            | .            | . | . | . | . | .      | . |
| Vv17g1013    | Tc03_g008530 | . | . | . | . | .      | . |
| .            | .            | . | . | . | . | .      | . |
| Vv17g1014    | .            | . | . | . | . | .      | . |
| .            | .            | . | . | . | . | .      | . |
| Vv17g1015    | .            | . | . | . | . | .      | . |
| .            | .            | . | . | . | . | .      | . |
| Vv17g1016    | .            | . | . | . | . | .      | . |
| .            | .            | . | . | . | . | .      | . |
| Vv17g1017    | .            | . | . | . | . | .      | . |
| Vv14g1333    | .            | . | . | . | . | .      | . |
| .            | .            | . | . | . | . | .      | . |
| Vv17g1018    | .            | . | . | . | . | .      | . |
| .            | .            | . | . | . | . | .      | . |
| Vv17g1019    | .            | . | . | . | . | .      | . |
| .            | .            | . | . | . | . | .      | . |
| Vv17g1020    | .            | . | . | . | . | .      | . |
| .            | .            | . | . | . | . | .      | . |
| Vv17g1021    | Tc03_g002130 | . | . | . | . | Gorai. | . |
| 008G199100.1 | .            | . | . | . | . | .      | . |
| .            | .            | . | . | . | . | .      | . |
| Vv17g1022    | .            | . | . | . | . | .      | . |
| .            | .            | . | . | . | . | .      | . |
| Vv17g1023    | .            | . | . | . | . | .      | . |
| .            | .            | . | . | . | . | .      | . |
| Vv17g1024    | Tc03_g002140 | . | . | . | . | .      | . |
| .            | .            | . | . | . | . | .      | . |
| Vv17g1025    | Tc03_g002150 | . | . | . | . | .      | . |
| .            | .            | . | . | . | . | .      | . |
| Vv17g1026    | .            | . | . | . | . | .      | . |

|              |              |   |   |   |        |   |
|--------------|--------------|---|---|---|--------|---|
| .            | .            | . | . | . | .      | . |
| .            | .            | . | . | . | .      | . |
| Vv17g1027    | Tc03_g002160 | . | . | . | Gorai. | . |
| 008G217300.1 | .            | . | . | . | .      | . |
| .            | .            | . | . | . | .      | . |
| Vv17g1028    | .            | . | . | . | .      | . |
| .            | .            | . | . | . | .      | . |
| .            | .            | . | . | . | .      | . |
| Vv17g1029    | Tc03_g002170 | . | . | . | Gorai. | . |
| 008G217200.1 | .            | . | . | . | .      | . |
| .            | .            | . | . | . | .      | . |
| Vv17g1030    | .            | . | . | . | .      | . |
| .            | .            | . | . | . | .      | . |
| .            | .            | . | . | . | .      | . |
| Vv17g1031    | Tc03_g002180 | . | . | . | Gorai. | . |
| 008G217100.1 | .            | . | . | . | .      | . |
| .            | .            | . | . | . | .      | . |
| Vv17g1032    | .            | . | . | . | .      | . |
| .            | .            | . | . | . | .      | . |
| Vv17g1033    | .            | . | . | . | .      | . |
| .            | .            | . | . | . | .      | . |
| .            | .            | . | . | . | .      | . |
| Vv17g1034    | Tc03_g002190 | . | . | . | .      | . |
| .            | .            | . | . | . | .      | . |
| Vv17g1035    | .            | . | . | . | .      | . |
| .            | .            | . | . | . | .      | . |
| Vv17g1036    | .            | . | . | . | .      | . |
| .            | .            | . | . | . | .      | . |
| Vv17g1037    | Tc03_g002220 | . | . | . | .      | . |
| .            | .            | . | . | . | .      | . |
| Vv17g1038    | Tc03_g002230 | . | . | . | .      | . |
| .            | .            | . | . | . | .      | . |
| Vv17g1039    | .            | . | . | . | .      | . |
| .            | .            | . | . | . | .      | . |
| Vv17g1040    | Tc03_g002260 | . | . | . | .      | . |
| .            | .            | . | . | . | .      | . |
| Vv17g1041    | Tc03_g002270 | . | . | . | .      | . |
| .            | .            | . | . | . | .      | . |
| Vv17g1042    | .            | . | . | . | .      | . |
| .            | .            | . | . | . | .      | . |
| .            | .            | . | . | . | .      | . |

|                    |                    |                    |              |   |        |   |
|--------------------|--------------------|--------------------|--------------|---|--------|---|
| Vv17g1043          | Tc03_g002290       | .                  | .            | . | .      | . |
|                    | Vv14g1298          | .                  | .            | . | .      | . |
| Vv17g1044          | .                  | .                  | .            | . | .      | . |
| .                  | .                  | .                  | .            | . | .      | . |
| Vv17g1045          | Tc03_g013540       | Gorai.001G064400.1 | .            | . | .      | . |
| .                  | .                  | .                  | .            | . | .      | . |
| Vv17g1046          | Tc03_g013550       | Gorai.001G064300.1 | .            | . | .      | . |
|                    | Gorai.008G201800.1 | .                  | .            | . | .      | . |
| .                  | .                  | .                  | .            | . | .      | . |
| Vv17g1047          | .                  | .                  | .            | . | .      | . |
| .                  | .                  | .                  | .            | . | .      | . |
| Vv17g1048          | Tc03_g013560       | Gorai.001G064200.1 | .            | . | .      | . |
|                    | Gorai.008G201900.1 | .                  | .            | . | .      | . |
| .                  | .                  | Vv01g0770          | Tc02_g025050 | . | .      | . |
|                    | Gorai.005G177200.1 | .                  | .            | . | .      | . |
| Vv17g1049          | Tc03_g013570       | .                  | .            | . | .      | . |
| .                  | .                  | .                  | .            | . | .      | . |
| Vv17g1050          | .                  | .                  | .            | . | .      | . |
| .                  | .                  | .                  | .            | . | .      | . |
| Vv17g1051          | .                  | .                  | .            | . | .      | . |
| .                  | .                  | .                  | .            | . | .      | . |
| Vv17g1052          | Tc03_g013580       | Gorai.001G064100.1 | .            | . | .      | . |
| .                  | .                  | .                  | .            | . | .      | . |
| Vv17g1053          | Tc03_g013590       | .                  | .            | . | Gorai. | . |
| 008G202100.1       | .                  | .                  | .            | . | .      | . |
| .                  | .                  | .                  | .            | . | .      | . |
| Vv17g1054          | .                  | .                  | .            | . | .      | . |
| .                  | .                  | .                  | .            | . | .      | . |
| Vv17g1055          | Tc03_g013600       | Gorai.001G064000.1 | .            | . | .      | . |
| .                  | .                  | .                  | .            | . | .      | . |
|                    | Vv01g0763          | Tc02_g025140       | .            | . | .      | . |
| Gorai.009G335400.1 | .                  | .                  | .            | . | .      | . |
| Vv17g1056          | Tc03_g013610       | .                  | .            | . | .      | . |
| .                  | .                  | .                  | .            | . | .      | . |
| Vv17g1057          | .                  | .                  | .            | . | .      | . |
| .                  | .                  | .                  | .            | . | .      | . |
| Vv17g1058          | Tc03_g013680       | Gorai.001G063800.1 | .            | . | .      | . |
| .                  | .                  | .                  | .            | . | .      | . |

|              |              |                    |   |   |        |   |
|--------------|--------------|--------------------|---|---|--------|---|
| .            | Vv01g0747    | .                  | . | . | .      | . |
| .            |              | .                  | . | . | .      | . |
| Vv17g1059    | .            | .                  | . | . | .      | . |
| .            | .            | .                  | . | . | .      | . |
| Vv17g1060    | .            | .                  | . | . | .      | . |
| .            | .            | .                  | . | . | .      | . |
| Vv17g1061    | Tc03_g013690 | Gorai.001G063600.1 | . | . | .      | . |
| .            | .            | .                  | . | . | .      | . |
| Vv17g1062    | .            | .                  | . | . | .      | . |
| .            | .            | .                  | . | . | .      | . |
| Vv17g1063    | .            | .                  | . | . | .      | . |
| .            | .            | .                  | . | . | .      | . |
| Vv17g1064    | .            | .                  | . | . | .      | . |
| .            | .            | .                  | . | . | .      | . |
| Vv17g1065    | .            | .                  | . | . | .      | . |
| .            | .            | .                  | . | . | .      | . |
| Vv17g1066    | .            | .                  | . | . | .      | . |
| .            | .            | .                  | . | . | .      | . |
| Vv17g1067    | Tc03_g013700 | .                  | . | . | Gorai. | . |
| 008G202400.1 | .            | .                  | . | . | .      | . |
| .            | .            | .                  | . | . | .      | . |
| Vv17g1068    | .            | .                  | . | . | Gorai. | . |
| 006G266700.1 | .            | .                  | . | . | .      | . |
| .            | .            | .                  | . | . | .      | . |
| Vv17g1069    | .            | .                  | . | . | .      | . |
| .            | .            | .                  | . | . | .      | . |
| Vv17g1070    | .            | .                  | . | . | .      | . |
| .            | .            | .                  | . | . | .      | . |
| Vv17g1071    | Tc03_g013710 | .                  | . | . | Gorai. | . |
| 008G202500.1 | .            | .                  | . | . | .      | . |
| .            | .            | .                  | . | . | .      | . |
| Vv17g1072    | Tc03_g013720 | .                  | . | . | Gorai. | . |
| 008G202600.1 | .            | .                  | . | . | .      | . |
| .            | .            | .                  | . | . | .      | . |
| Vv17g1073    | .            | .                  | . | . | .      | . |
| .            | .            | .                  | . | . | .      | . |
| Vv17g1074    | Tc03_g013740 | .                  | . | . | .      | . |
| .            | .            | .                  | . | . | .      | . |
| .            | .            | .                  | . | . | .      | . |



|                    |                    |                    |   |   |                    |        |   |
|--------------------|--------------------|--------------------|---|---|--------------------|--------|---|
| Vv17g1075          | .                  | .                  | . | . | .                  | .      | . |
| .                  | .                  | .                  | . | . | .                  | .      | . |
| Vv17g1076          | .                  | .                  | . | . | .                  | .      | . |
| .                  | .                  | .                  | . | . | .                  | .      | . |
| Vv17g1077          | Tc03_g013760       | .                  | . | . | .                  | Gorai. | . |
| 008G202700.1       | .                  | .                  | . | . | .                  | .      | . |
| .                  | Vv01g0737          | Tc02_g025310       | . | . | .                  | Gorai. | . |
| 005G175700.1       | Gorai.009G335200.1 | .                  | . | . | .                  | .      | . |
| Vv17g1078          | Tc03_g013770       | .                  | . | . | .                  | Gorai. | . |
| 008G202800.1       | .                  | .                  | . | . | .                  | .      | . |
| .                  | .                  | .                  | . | . | .                  | .      | . |
| Vv17g1079          | Tc03_g013810       | .                  | . | . | .                  | Gorai. | . |
| 008G203100.1       | .                  | .                  | . | . | .                  | .      | . |
| .                  | .                  | .                  | . | . | .                  | .      | . |
| Vv17g1080          | Tc03_g013820       | Gorai.001G063100.1 | . | . | .                  | .      | . |
| .                  | .                  | .                  | . | . | .                  | .      | . |
| .                  | .                  | .                  | . | . | .                  | .      | . |
| Vv17g1081          | Tc03_g013830       | Gorai.001G063000.1 | . | . | .                  | .      | . |
| Gorai.008G203200.1 | .                  | .                  | . | . | .                  | .      | . |
| .                  | .                  | .                  | . | . | .                  | .      | . |
| Vv17g1082          | .                  | .                  | . | . | .                  | .      | . |
| .                  | .                  | .                  | . | . | .                  | .      | . |
| Vv17g1083          | Tc03_g013840       | .                  | . | . | Gorai.007G041500.1 | .      | . |
| .                  | Vv14g1276          | .                  | . | . | Gorai.011G093700.1 | .      | . |
| .                  | .                  | Vv01g0731          | . | . | .                  | .      | . |
| Tc02_g025400       | Gorai.005G175200.1 | .                  | . | . | .                  | .      | . |
| Vv17g1084          | Tc03_g013850       | .                  | . | . | Gorai.             | .      | . |
| 008G203300.1       | .                  | .                  | . | . | .                  | .      | . |
| .                  | .                  | .                  | . | . | .                  | .      | . |
| Vv17g1085          | Tc03_g013860       | .                  | . | . | Gorai.             | .      | . |
| 008G203400.1       | Gorai.006G269700.1 | .                  | . | . | .                  | .      | . |
| .                  | .                  | .                  | . | . | .                  | .      | . |
| Vv17g1086          | Tc03_g013890       | .                  | . | . | .                  | .      | . |
| .                  | .                  | .                  | . | . | .                  | .      | . |
| .                  | .                  | .                  | . | . | .                  | .      | . |
| Vv17g1087          | Tc03_g013920       | Gorai.001G062700.1 | . | . | .                  | .      | . |
| .                  | Gorai.006G269800.1 | Vv14g1274          | . | . | .                  | .      | . |
| Tc04_g002220       | .                  | .                  | . | . | Gorai.012G066500.1 | .      | . |
| .                  | .                  | .                  | . | . | .                  | .      | . |
| Vv17g1088          | .                  | .                  | . | . | Gorai.008G203700.1 | .      | . |
| .                  | .                  | .                  | . | . | .                  | .      | . |
| .                  | .                  | .                  | . | . | .                  | .      | . |
| Vv17g1089          | Tc03_g013940       | .                  | . | . | .                  | .      | . |
| Gorai.006G269900.1 | .                  | .                  | . | . | .                  | .      | . |
| .                  | .                  | .                  | . | . | .                  | .      | . |

|                    |                    |                    |   |                    |   |        |   |
|--------------------|--------------------|--------------------|---|--------------------|---|--------|---|
| Vv17g1090          | .                  | .                  | . | .                  | . | .      | . |
| .                  | .                  | .                  | . | .                  | . | .      | . |
| Vv17g1091          | .                  | .                  | . | .                  | . | .      | . |
| .                  | .                  | .                  | . | .                  | . | .      | . |
| Vv17g1092          | .                  | .                  | . | .                  | . | .      | . |
| .                  | .                  | .                  | . | .                  | . | .      | . |
| Vv17g1093          | Tc03_g013960       | .                  | . | .                  | . | Gorai. | . |
| 008G203800.1       | .                  | .                  | . | .                  | . | .      | . |
| .                  | Vv01g0726          | Tc02_g025520       | . | .                  | . | .      | . |
| Gorai.008G161800.1 | .                  | .                  | . | .                  | . | .      | . |
| Vv17g1094          | Gorai.001G062600.1 | .                  | . | .                  | . | .      | . |
| .                  | .                  | .                  | . | .                  | . | .      | . |
| Vv17g1095          | Tc03_g013990       | Gorai.001G062300.1 | . | .                  | . | .      | . |
| Gorai.008G204000.1 | .                  | .                  | . | .                  | . | .      | . |
| .                  | .                  | .                  | . | .                  | . | .      | . |
| Vv17g1096          | .                  | .                  | . | .                  | . | .      | . |
| .                  | .                  | .                  | . | .                  | . | .      | . |
| Vv17g1097          | .                  | .                  | . | .                  | . | .      | . |
| Vv14g1268          | Tc04_g002320       | .                  | . | Gorai.001G267300.1 | . | .      | . |
| Gorai.006G036300.1 | .                  | .                  | . | Vv01g0714          | . | .      | . |
| Tc02_g025720       | Gorai.002G189900.1 | .                  | . | Gorai.005G174600.1 | . | .      | . |
| Gorai.008G162500.1 | .                  | .                  | . | .                  | . | .      | . |
| Vv17g1098          | .                  | .                  | . | .                  | . | .      | . |
| .                  | .                  | .                  | . | .                  | . | .      | . |
| Vv17g1099          | Tc03_g014000       | Gorai.001G062200.1 | . | .                  | . | .      | . |
| .                  | .                  | .                  | . | .                  | . | .      | . |
| Vv17g1100          | .                  | .                  | . | .                  | . | .      | . |
| .                  | .                  | .                  | . | .                  | . | .      | . |
| Vv17g1101          | Tc03_g014010       | .                  | . | .                  | . | .      | . |
| .                  | .                  | .                  | . | .                  | . | .      | . |
| Vv17g1102          | Tc03_g014030       | .                  | . | .                  | . | .      | . |
| .                  | .                  | .                  | . | .                  | . | .      | . |
| Vv17g1103          | .                  | .                  | . | .                  | . | .      | . |
| .                  | .                  | .                  | . | .                  | . | .      | . |
| Vv17g1104          | Tc03_g014040       | Gorai.001G062100.1 | . | .                  | . | .      | . |
| .                  | .                  | .                  | . | .                  | . | .      | . |
| Vv17g1105          | Tc03_g014050       | Gorai.001G062000.1 | . | .                  | . | .      | . |

|                    |                    |                    |   |   |   |           |   |
|--------------------|--------------------|--------------------|---|---|---|-----------|---|
| .                  | .                  | .                  | . | . | . | .         | . |
| .                  | .                  | .                  | . | . | . | .         | . |
| Vv17g1106          | .                  | .                  | . | . | . | .         | . |
| .                  | .                  | .                  | . | . | . | .         | . |
| .                  | .                  | .                  | . | . | . | .         | . |
| Vv17g1107          | Tc03_g014060       | .                  | . | . | . | Gorai.    | . |
| 008G204100.1       | .                  | .                  | . | . | . | .         | . |
| .                  | .                  | .                  | . | . | . | .         | . |
| Vv17g1108          | Tc03_g014070       | .                  | . | . | . | Gorai.    | . |
| 008G204200.1       | .                  | .                  | . | . | . | .         | . |
| .                  | Vv01g0709          | Tc02_g025770       | . | . | . | Gorai.    | . |
| 005G174300.1       | .                  | Gorai.012G173900.1 | . | . | . | .         | . |
| Vv17g1109          | Tc03_g014080       | .                  | . | . | . | .         | . |
| Gorai.006G270000.1 | .                  | .                  | . | . | . | .         | . |
| .                  | .                  | .                  | . | . | . | .         | . |
| Vv17g1110          | .                  | .                  | . | . | . | .         | . |
| .                  | .                  | .                  | . | . | . | .         | . |
| .                  | .                  | .                  | . | . | . | .         | . |
| Vv17g1111          | .                  | .                  | . | . | . | .         | . |
| .                  | .                  | .                  | . | . | . | .         | . |
| .                  | .                  | .                  | . | . | . | .         | . |
| Vv17g1112          | .                  | .                  | . | . | . | .         | . |
| .                  | .                  | .                  | . | . | . | .         | . |
| .                  | .                  | .                  | . | . | . | .         | . |
| Vv17g1113          | .                  | .                  | . | . | . | .         | . |
| .                  | .                  | .                  | . | . | . | .         | . |
| .                  | .                  | .                  | . | . | . | .         | . |
| Vv17g1114          | Tc03_g014090       | .                  | . | . | . | Gorai.    | . |
| 008G204300.1       | .                  | .                  | . | . | . | .         | . |
| .                  | .                  | .                  | . | . | . | .         | . |
| Vv17g1115          | .                  | .                  | . | . | . | .         | . |
| .                  | .                  | .                  | . | . | . | .         | . |
| .                  | .                  | .                  | . | . | . | .         | . |
| Vv17g1116          | Tc03_g014100       | Gorai.001G061900.1 | . | . | . | .         | . |
| .                  | Gorai.006G270100.1 | .                  | . | . | . | .         | . |
| .                  | .                  | .                  | . | . | . | .         | . |
| .                  | .                  | .                  | . | . | . | .         | . |
| Vv17g1117          | Tc03_g014110       | Gorai.001G061800.1 | . | . | . | .         | . |
| Gorai.007G041600.1 | Gorai.008G204400.1 | .                  | . | . | . | Vv14g1262 | . |
| .                  | .                  | Gorai.006G036900.1 | . | . | . | .         | . |
| .                  | .                  | .                  | . | . | . | .         | . |
| Vv17g1118          | Tc03_g014120       | .                  | . | . | . | Gorai.    | . |
| 008G204500.1       | Gorai.006G270200.1 | Vv14g1261          | . | . | . | .         | . |
| .                  | .                  | .                  | . | . | . | .         | . |
| .                  | .                  | .                  | . | . | . | .         | . |
| Vv17g1119          | .                  | .                  | . | . | . | .         | . |
| .                  | .                  | .                  | . | . | . | .         | . |
| .                  | .                  | .                  | . | . | . | .         | . |
| Vv17g1120          | .                  | .                  | . | . | . | .         | . |
| .                  | .                  | .                  | . | . | . | .         | . |

|              |                    |                    |   |   |   |           |   |
|--------------|--------------------|--------------------|---|---|---|-----------|---|
| Vv17g1121    | .                  | .                  | . | . | . | .         | . |
| .            | .                  | .                  | . | . | . | .         | . |
| Vv17g1122    | .                  | .                  | . | . | . | .         | . |
| .            | .                  | .                  | . | . | . | .         | . |
| Vv17g1123    | .                  | .                  | . | . | . | .         | . |
| .            | .                  | .                  | . | . | . | .         | . |
| Vv17g1124    | Tc03_g014130       | .                  | . | . | . | .         | . |
| .            | .                  | .                  | . | . | . | .         | . |
| Vv17g1125    | .                  | .                  | . | . | . | .         | . |
| .            | .                  | .                  | . | . | . | .         | . |
| Vv17g1126    | .                  | .                  | . | . | . | .         | . |
| .            | .                  | .                  | . | . | . | .         | . |
| Vv17g1127    | .                  | .                  | . | . | . | .         | . |
| .            | .                  | .                  | . | . | . | .         | . |
| Vv17g1128    | .                  | .                  | . | . | . | .         | . |
| .            | .                  | .                  | . | . | . | .         | . |
| Vv17g1129    | .                  | .                  | . | . | . | .         | . |
| .            | .                  | .                  | . | . | . | .         | . |
| Vv17g1130    | Tc03_g014140       | .                  | . | . | . | Gorai.    | . |
| 008G204600.1 | .                  | .                  | . | . | . | .         | . |
| Vv17g1131    | Tc03_g014150       | .                  | . | . | . | .         | . |
| .            | .                  | .                  | . | . | . | .         | . |
| Vv17g1132    | .                  | .                  | . | . | . | .         | . |
| .            | .                  | .                  | . | . | . | .         | . |
| Vv17g1133    | Tc03_g014160       | Gorai.001G061700.1 | . | . | . | .         | . |
| .            | .                  | .                  | . | . | . | .         | . |
| Vv17g1134    | .                  | .                  | . | . | . | .         | . |
| .            | .                  | .                  | . | . | . | .         | . |
| Vv17g1135    | .                  | .                  | . | . | . | .         | . |
| .            | .                  | .                  | . | . | . | .         | . |
| Vv17g1136    | .                  | .                  | . | . | . | .         | . |
| .            | .                  | .                  | . | . | . | .         | . |
| Tc02_g025980 | Gorai.002G169300.1 | .                  | . | . | . | Vv01g0697 | . |
| 009G329400.1 | .                  | .                  | . | . | . | Gorai.    | . |

|                    |                    |                    |   |   |   |        |   |
|--------------------|--------------------|--------------------|---|---|---|--------|---|
| Vv17g1137          | .                  | .                  | . | . | . | .      | . |
| .                  | .                  | .                  | . | . | . | .      | . |
| Vv17g1138          | .                  | .                  | . | . | . | .      | . |
| .                  | .                  | .                  | . | . | . | .      | . |
| Vv17g1139          | Tc03_g014180       | .                  | . | . | . | Gorai. | . |
| 008G204700.1       | .                  | .                  | . | . | . | .      | . |
| .                  | .                  | .                  | . | . | . | .      | . |
| Vv17g1140          | .                  | .                  | . | . | . | .      | . |
| .                  | .                  | .                  | . | . | . | .      | . |
| Vv17g1141          | Tc03_g014190       | Gorai.001G061600.1 | . | . | . | .      | . |
| .                  | .                  | Vv14g1250          | . | . | . | .      | . |
| .                  | Gorai.012G090700.1 | .                  | . | . | . | .      | . |
| .                  | .                  | .                  | . | . | . | .      | . |
| Vv17g1142          | Tc03_g014200       | .                  | . | . | . | .      | . |
| Gorai.006G270300.1 | .                  | .                  | . | . | . | .      | . |
| .                  | .                  | .                  | . | . | . | .      | . |
| Vv17g1143          | Tc03_g014210       | Gorai.001G061500.1 | . | . | . | .      | . |
| Gorai.007G041800.1 | .                  | .                  | . | . | . | .      | . |
| .                  | .                  | .                  | . | . | . | .      | . |
| Vv17g1144          | .                  | .                  | . | . | . | .      | . |
| .                  | .                  | .                  | . | . | . | .      | . |
| Vv17g1145          | .                  | .                  | . | . | . | .      | . |
| .                  | .                  | .                  | . | . | . | .      | . |
| Vv17g1146          | .                  | .                  | . | . | . | .      | . |
| .                  | .                  | .                  | . | . | . | .      | . |
| Vv17g1147          | Tc03_g014220       | Gorai.001G061400.1 | . | . | . | .      | . |
| .                  | .                  | .                  | . | . | . | .      | . |
| .                  | .                  | .                  | . | . | . | .      | . |
| Vv17g1148          | Tc03_g014240       | Gorai.001G059300.1 | . | . | . | .      | . |
| .                  | .                  | .                  | . | . | . | .      | . |
| .                  | .                  | .                  | . | . | . | .      | . |
| Vv17g1149          | Tc03_g014250       | .                  | . | . | . | Gorai. | . |
| 008G204800.1       | Gorai.006G270400.1 | .                  | . | . | . | .      | . |
| .                  | .                  | .                  | . | . | . | .      | . |
| .                  | .                  | .                  | . | . | . | .      | . |
| Vv17g1150          | Tc03_g014260       | Gorai.001G056300.1 | . | . | . | .      | . |
| .                  | Gorai.006G270500.1 | .                  | . | . | . | .      | . |
| .                  | .                  | .                  | . | . | . | .      | . |
| .                  | .                  | .                  | . | . | . | .      | . |
| Vv17g1151          | .                  | .                  | . | . | . | .      | . |
| .                  | .                  | .                  | . | . | . | .      | . |
| .                  | .                  | .                  | . | . | . | .      | . |
| Vv17g1152          | .                  | .                  | . | . | . | .      | . |

|                    |                    |   |   |   |                    |        |   |
|--------------------|--------------------|---|---|---|--------------------|--------|---|
| .                  | .                  | . | . | . | .                  | .      | . |
| .                  | .                  | . | . | . | .                  | .      | . |
| Vv17g1153          | Tc03_g014280       | . | . | . | .                  | .      | . |
| Gorai.006G270700.1 | .                  | . | . | . | .                  | .      | . |
| .                  | .                  | . | . | . | .                  | .      | . |
| Vv17g1154          | .                  | . | . | . | .                  | .      | . |
| .                  | .                  | . | . | . | .                  | .      | . |
| .                  | .                  | . | . | . | .                  | .      | . |
| Vv17g1155          | Tc03_g014290       | . | . | . | .                  | .      | . |
| .                  | .                  | . | . | . | .                  | .      | . |
| .                  | .                  | . | . | . | .                  | .      | . |
| Vv17g1156          | .                  | . | . | . | .                  | .      | . |
| .                  | .                  | . | . | . | .                  | .      | . |
| .                  | .                  | . | . | . | .                  | .      | . |
| Vv17g1157          | .                  | . | . | . | .                  | .      | . |
| .                  | .                  | . | . | . | .                  | .      | . |
| .                  | .                  | . | . | . | .                  | .      | . |
| Vv17g1158          | .                  | . | . | . | .                  | .      | . |
| .                  | .                  | . | . | . | .                  | .      | . |
| .                  | .                  | . | . | . | .                  | .      | . |
| Vv17g1159          | .                  | . | . | . | .                  | .      | . |
| .                  | .                  | . | . | . | .                  | .      | . |
| .                  | .                  | . | . | . | .                  | .      | . |
| Vv17g1160          | .                  | . | . | . | .                  | .      | . |
| .                  | .                  | . | . | . | .                  | .      | . |
| .                  | .                  | . | . | . | .                  | .      | . |
| Vv17g1161          | .                  | . | . | . | .                  | .      | . |
| .                  | .                  | . | . | . | .                  | .      | . |
| .                  | .                  | . | . | . | .                  | .      | . |
| Vv17g1162          | .                  | . | . | . | .                  | .      | . |
| Vv14g1238          | Tc04_g002690       | . | . | . | .                  | .      | . |
| .                  | .                  | . | . | . | .                  | .      | . |
| Vv17g1163          | .                  | . | . | . | .                  | .      | . |
| .                  | .                  | . | . | . | .                  | .      | . |
| .                  | .                  | . | . | . | .                  | .      | . |
| Vv17g1164          | Tc03_g014400       | . | . | . | Gorai.007G041900.1 | .      | . |
| .                  | Vv14g1237          | . | . | . | Tc04_g002700       | Gorai. | . |
| 011G088800.1       | Gorai.001G268500.1 | . | . | . | Gorai.007G074000.1 | .      | . |
| Gorai.006G038900.1 | Gorai.012G089500.1 | . | . | . | .                  | .      | . |
| .                  | .                  | . | . | . | .                  | .      | . |
| Vv17g1165          | .                  | . | . | . | .                  | .      | . |
| .                  | .                  | . | . | . | .                  | .      | . |
| .                  | .                  | . | . | . | .                  | .      | . |
| Vv17g1166          | .                  | . | . | . | .                  | .      | . |
| Vv01g0683          | Gorai.002G170400.1 | . | . | . | .                  | .      | . |
| Gorai.008G291400.1 | .                  | . | . | . | .                  | .      | . |
| .                  | .                  | . | . | . | .                  | .      | . |
| Vv17g1167          | .                  | . | . | . | .                  | .      | . |
| .                  | .                  | . | . | . | .                  | .      | . |
| .                  | .                  | . | . | . | .                  | .      | . |

|           |                    |                    |   |   |                    |   |   |
|-----------|--------------------|--------------------|---|---|--------------------|---|---|
| Vv17g1168 | .                  | .                  | . | . | .                  | . | . |
| .         | .                  | .                  | . | . | .                  | . | . |
| Vv18g0001 | .                  | .                  | . | . | Gorai.009G291700.1 | . | . |
| .         | .                  | .                  | . | . | .                  | . | . |
| Vv18g0002 | .                  | .                  | . | . | .                  | . | . |
| .         | .                  | .                  | . | . | .                  | . | . |
| Vv18g0003 | .                  | .                  | . | . | .                  | . | . |
| .         | .                  | .                  | . | . | .                  | . | . |
| Vv18g0004 | .                  | .                  | . | . | .                  | . | . |
| Vv03g0423 | Tc02_g006510       | Gorai.013G035100.1 | . | . | .                  | . | . |
|           | Gorai.008G030600.1 | Gorai.012G154900.1 | . | . | .                  | . | . |
| .         | .                  | .                  | . | . | .                  | . | . |
| Vv18g0005 | .                  | .                  | . | . | .                  | . | . |
| .         | .                  | .                  | . | . | .                  | . | . |
| Vv18g0006 | .                  | .                  | . | . | .                  | . | . |
| .         | .                  | .                  | . | . | .                  | . | . |
| Vv18g0007 | .                  | .                  | . | . | .                  | . | . |
| .         | .                  | .                  | . | . | .                  | . | . |
| Vv18g0008 | .                  | .                  | . | . | .                  | . | . |
| .         | .                  | .                  | . | . | .                  | . | . |
| Vv18g0009 | .                  | .                  | . | . | .                  | . | . |
| .         | .                  | .                  | . | . | .                  | . | . |
| Vv18g0010 | .                  | .                  | . | . | .                  | . | . |
| .         | .                  | .                  | . | . | .                  | . | . |
| Vv18g0011 | .                  | Gorai.002G111500.1 | . | . | .                  | . | . |
| .         | .                  | .                  | . | . | .                  | . | . |
| Vv18g0012 | .                  | Gorai.002G111600.1 | . | . | .                  | . | . |
| .         | .                  | .                  | . | . | .                  | . | . |
| Vv18g0013 | Tc08_g009970       | .                  | . | . | .                  | . | . |
| .         | .                  | .                  | . | . | .                  | . | . |
| Vv18g0014 | .                  | .                  | . | . | .                  | . | . |
| .         | .                  | .                  | . | . | .                  | . | . |
| Vv18g0015 | .                  | .                  | . | . | .                  | . | . |
| .         | .                  | .                  | . | . | .                  | . | . |
| Vv18g0016 | .                  | Gorai.002G111700.1 | . | . | .                  | . | . |

|              |              |                    |                    |  |        |  |
|--------------|--------------|--------------------|--------------------|--|--------|--|
| Vv18g0017    | Tc08_g010590 |                    |                    |  |        |  |
| Vv18g0018    |              |                    | Gorai.009G185700.1 |  |        |  |
| Vv18g0019    | Tc08_g009680 |                    |                    |  |        |  |
| Vv18g0020    |              | Gorai.002G112000.1 |                    |  |        |  |
| Vv18g0021    |              | Gorai.002G112100.1 |                    |  |        |  |
| Vv18g0022    |              |                    |                    |  |        |  |
| Vv18g0023    |              |                    |                    |  |        |  |
| Vv18g0024    |              |                    |                    |  |        |  |
| Vv18g0025    |              |                    |                    |  |        |  |
| Vv03g0395    | Tc02_g012710 |                    |                    |  | Gorai. |  |
| 008G012900.1 |              |                    |                    |  |        |  |
| Vv18g0026    |              |                    |                    |  |        |  |
| Vv18g0027    |              | Gorai.002G112200.1 |                    |  |        |  |
| Vv18g0028    |              |                    |                    |  |        |  |
| Vv18g0029    |              |                    |                    |  |        |  |
| Vv18g0030    |              |                    |                    |  |        |  |
| Vv18g0031    |              |                    |                    |  |        |  |
| Vv18g0032    |              |                    |                    |  |        |  |





|              |                    |                    |                    |   |                    |
|--------------|--------------------|--------------------|--------------------|---|--------------------|
| Vv18g0048    | .                  | .                  | .                  | . | Gorai.009G290900.1 |
| .            | .                  | .                  | .                  | . | .                  |
| Vv18g0049    | .                  | .                  | .                  | . | Gorai.009G288000.1 |
| .            | .                  | .                  | .                  | . | .                  |
| Vv18g0050    | .                  | .                  | .                  | . | .                  |
| .            | .                  | .                  | .                  | . | .                  |
| Vv18g0051    | .                  | Gorai.002G112500.1 | .                  | . | Gorai.005G117700.1 |
| .            | .                  | .                  | .                  | . | .                  |
| .            | .                  | .                  | .                  | . | .                  |
| Vv18g0052    | Tc08_g010960       | .                  | .                  | . | Gorai.009G185900.1 |
| .            | .                  | .                  | .                  | . | .                  |
| Vv18g0053    | .                  | .                  | .                  | . | .                  |
| .            | .                  | .                  | .                  | . | .                  |
| Vv18g0054    | .                  | Gorai.002G112700.1 | .                  | . | .                  |
| .            | .                  | .                  | .                  | . | .                  |
| Vv18g0055    | .                  | Gorai.002G112800.1 | .                  | . | .                  |
| .            | .                  | .                  | .                  | . | .                  |
| Vv18g0056    | .                  | .                  | .                  | . | .                  |
| .            | .                  | .                  | .                  | . | .                  |
| Vv18g0057    | .                  | Gorai.002G113200.1 | .                  | . | .                  |
| .            | .                  | .                  | .                  | . | .                  |
| Vv18g0058    | .                  | .                  | .                  | . | .                  |
| .            | .                  | .                  | .                  | . | .                  |
| Vv18g0059    | .                  | .                  | Gorai.005G115700.1 | . | .                  |
| .            | .                  | .                  | .                  | . | .                  |
| Vv18g0060    | .                  | .                  | .                  | . | .                  |
| Vv03g0376    | Tc02_g012530       | .                  | .                  | . | Gorai.             |
| 008G013500.1 | Gorai.012G138700.1 | .                  | .                  | . | .                  |
| .            | .                  | .                  | .                  | . | .                  |
| Vv18g0061    | .                  | .                  | .                  | . | .                  |
| .            | .                  | .                  | .                  | . | .                  |
| Vv18g0062    | Tc08_g011030       | .                  | .                  | . | .                  |
| .            | .                  | .                  | .                  | . | .                  |
| Vv18g0063    | Tc08_g005370       | .                  | .                  | . | .                  |
| .            | .                  | .                  | .                  | . | .                  |
| .            | .                  | .                  | .                  | . | .                  |



|                    |              |                    |                    |
|--------------------|--------------|--------------------|--------------------|
| .                  | Vv01g0579    | Tc02_g028070       | Gorai.002G174100.1 |
| Gorai.005G159100.1 | .            | .                  | .                  |
| Vv18g0080          | Tc08_g005230 | .                  | Gorai.009G186500.1 |
| .                  | Vv03g0369    | Tc02_g012440       | Gorai.             |
| 013G064100.1       | .            | Gorai.008G013900.1 | .                  |
| .                  | .            | .                  | .                  |
| Vv18g0081          | Tc08_g005220 | Gorai.002G114300.1 | Gorai.             |
| 005G114600.1       | .            | .                  | .                  |
| .                  | .            | .                  | .                  |
| .                  | .            | .                  | .                  |
| Vv18g0082          | Tc08_g005210 | Gorai.002G114400.1 | .                  |
| .                  | .            | .                  | .                  |
| .                  | .            | .                  | .                  |
| Vv18g0083          | Tc08_g005200 | Gorai.002G114500.1 | .                  |
| .                  | .            | .                  | .                  |
| .                  | .            | .                  | .                  |
| Vv18g0084          | Tc08_g005190 | Gorai.002G114600.1 | .                  |
| .                  | .            | .                  | .                  |
| .                  | Vv01g0551    | Tc02_g028440       | .                  |
| .                  | .            | .                  | .                  |
| Vv18g0085          | .            | .                  | .                  |
| .                  | .            | .                  | .                  |
| .                  | .            | .                  | .                  |
| Vv18g0086          | Tc08_g005180 | Gorai.002G114700.1 | .                  |
| .                  | .            | .                  | .                  |
| .                  | .            | .                  | .                  |
| Vv18g0087          | Tc08_g005170 | Gorai.002G114800.1 | .                  |
| .                  | Vv03g0365    | .                  | .                  |
| .                  | .            | .                  | .                  |
| .                  | .            | .                  | .                  |
| Vv18g0088          | .            | .                  | .                  |
| .                  | .            | .                  | .                  |
| .                  | .            | .                  | .                  |
| Vv18g0089          | Tc08_g005160 | .                  | Gorai.009G186600.1 |
| .                  | .            | .                  | .                  |
| .                  | .            | .                  | .                  |
| Vv18g0090          | Tc08_g005140 | .                  | Gorai.009G186700.1 |
| .                  | .            | .                  | .                  |
| .                  | .            | .                  | .                  |
| Vv18g0091          | Tc08_g005130 | .                  | .                  |
| .                  | .            | .                  | .                  |
| Vv01g0516          | Tc02_g027160 | .                  | Gorai.             |
| 008G289800.1       | .            | .                  | .                  |
| Vv18g0092          | Tc08_g005120 | .                  | .                  |
| .                  | .            | .                  | .                  |
| .                  | .            | .                  | .                  |
| Vv18g0093          | .            | Gorai.002G115000.1 | .                  |
| .                  | .            | .                  | .                  |
| .                  | .            | .                  | .                  |
| Vv18g0094          | Tc08_g005110 | Gorai.002G115100.1 | Gorai.             |

|                    |                    |                    |                    |                    |   |
|--------------------|--------------------|--------------------|--------------------|--------------------|---|
| 005G114500.1       | Gorai.009G186800.1 | .                  | .                  | .                  | . |
| .                  | .                  | .                  | .                  | .                  | . |
| Vv18g0095          | Tc08_g005100       | .                  | .                  | Gorai.009G186900.1 | . |
| .                  | .                  | .                  | .                  | .                  | . |
| Vv18g0096          | Tc08_g005090       | Gorai.002G115300.1 | .                  | .                  | . |
| .                  | .                  | Vv03g0362          | Tc02_g012360       | .                  | . |
| .                  | .                  | Gorai.012G139400.1 | .                  | .                  | . |
| .                  | .                  | .                  | .                  | .                  | . |
| Vv18g0097          | Tc08_g005080       | .                  | Gorai.005G114300.1 | .                  | . |
| Gorai.009G187000.1 | .                  | .                  | Vv03g0361          | .                  | . |
| .                  | .                  | Gorai.008G014100.1 | .                  | .                  | . |
| .                  | .                  | .                  | .                  | .                  | . |
| Vv18g0098          | Tc08_g005060       | Gorai.002G115500.1 | .                  | .                  | . |
| .                  | .                  | .                  | .                  | .                  | . |
| .                  | .                  | .                  | .                  | .                  | . |
| Vv18g0099          | Tc08_g005050       | Gorai.002G115600.1 | .                  | .                  | . |
| .                  | .                  | .                  | .                  | .                  | . |
| .                  | .                  | .                  | .                  | .                  | . |
| Vv18g0100          | .                  | .                  | .                  | .                  | . |
| .                  | .                  | .                  | .                  | .                  | . |
| .                  | .                  | .                  | .                  | .                  | . |
| Vv18g0101          | Tc08_g005030       | .                  | Gorai.005G114200.1 | .                  | . |
| .                  | .                  | .                  | .                  | .                  | . |
| .                  | .                  | .                  | .                  | .                  | . |
| Vv18g0102          | .                  | .                  | .                  | .                  | . |
| .                  | .                  | .                  | .                  | .                  | . |
| .                  | .                  | .                  | .                  | .                  | . |
| Vv18g0103          | Tc08_g005020       | Gorai.002G115700.1 | .                  | .                  | . |
| .                  | .                  | Vv03g0353          | Gorai.002G206800.1 | .                  | . |
| .                  | .                  | .                  | .                  | .                  | . |
| .                  | .                  | .                  | .                  | .                  | . |
| Vv18g0104          | Tc08_g005000       | .                  | .                  | .                  | . |
| .                  | Vv03g0351          | Tc02_g003500       | Gorai.002G206700.1 | .                  | . |
| Gorai.005G259100.1 | .                  | Gorai.008G041100.1 | .                  | .                  | . |
| .                  | .                  | .                  | .                  | .                  | . |
| Vv18g0105          | .                  | Gorai.002G115800.1 | .                  | Gorai.             | . |
| 009G187500.1       | .                  | .                  | .                  | .                  | . |
| .                  | .                  | .                  | .                  | .                  | . |
| .                  | .                  | .                  | .                  | .                  | . |
| Vv18g0106          | Tc08_g004990       | Gorai.002G115900.1 | .                  | .                  | . |
| Gorai.009G187600.1 | .                  | .                  | .                  | .                  | . |
| .                  | .                  | .                  | .                  | .                  | . |
| .                  | .                  | .                  | .                  | .                  | . |
| Vv18g0107          | Tc08_g004960       | .                  | .                  | Gorai.009G187700.1 | . |
| .                  | .                  | .                  | .                  | .                  | . |
| .                  | .                  | .                  | .                  | .                  | . |
| .                  | .                  | .                  | .                  | .                  | . |
| Vv18g0108          | Tc08_g004950       | Gorai.002G116800.1 | .                  | Gorai.             | . |
| 005G113900.1       | Gorai.009G187800.1 | .                  | .                  | Vv03g0341          | . |

|           |              |                    |  |                    |  |  |  |
|-----------|--------------|--------------------|--|--------------------|--|--|--|
| Vv18g0109 |              |                    |  |                    |  |  |  |
| Vv18g0110 |              |                    |  |                    |  |  |  |
| Vv18g0111 |              |                    |  |                    |  |  |  |
| Vv18g0112 |              | Gorai.002G117000.1 |  |                    |  |  |  |
| Vv18g0113 |              |                    |  |                    |  |  |  |
| Vv18g0114 |              |                    |  |                    |  |  |  |
| Vv18g0115 | Tc08_g004890 |                    |  |                    |  |  |  |
| Vv18g0116 |              |                    |  |                    |  |  |  |
| Vv18g0117 | Tc08_g007990 |                    |  |                    |  |  |  |
| Vv18g0118 |              |                    |  |                    |  |  |  |
| Vv18g0119 |              |                    |  |                    |  |  |  |
| Vv18g0120 |              |                    |  |                    |  |  |  |
| Vv18g0121 | Tc08_g007910 |                    |  |                    |  |  |  |
| Vv18g0122 |              |                    |  |                    |  |  |  |
| Vv18g0123 |              |                    |  |                    |  |  |  |
| Vv18g0124 |              |                    |  | Gorai.009G187900.1 |  |  |  |

|                    |              |   |                    |                    |        |
|--------------------|--------------|---|--------------------|--------------------|--------|
| Vv18g0125          | .            | . | Gorai.005G113700.1 | .                  | .      |
| .                  | .            | . | .                  | .                  | .      |
| Vv18g0126          | .            | . | .                  | .                  | .      |
| .                  | .            | . | .                  | .                  | .      |
| Vv18g0127          | Tc08_g004800 | . | Gorai.002G118000.1 | .                  | .      |
| .                  | .            | . | .                  | .                  | .      |
| Vv18g0128          | Tc08_g004790 | . | Gorai.002G118100.1 | .                  | .      |
| .                  | .            | . | .                  | .                  | .      |
| Vv18g0129          | Tc08_g004780 | . | Gorai.002G118200.1 | .                  | .      |
| .                  | .            | . | .                  | .                  | .      |
| .                  | Vv01g0514    | . | Tc02_g027180       | .                  | .      |
| .                  | .            | . | .                  | .                  | .      |
| Vv18g0130          | Tc08_g004770 | . | Gorai.002G118400.1 | .                  | .      |
| Gorai.009G188200.1 | .            | . | .                  | .                  | .      |
| .                  | .            | . | .                  | .                  | .      |
| .                  | .            | . | .                  | .                  | .      |
| Vv18g0131          | Tc08_g004760 | . | .                  | .                  | Gorai. |
| 009G267800.1       | .            | . | .                  | .                  | .      |
| .                  | .            | . | .                  | .                  | .      |
| Vv18g0132          | Tc08_g004750 | . | Gorai.002G118500.1 | .                  | .      |
| Gorai.009G188300.1 | .            | . | .                  | .                  | .      |
| .                  | .            | . | .                  | .                  | .      |
| .                  | .            | . | .                  | .                  | .      |
| Vv18g0133          | .            | . | .                  | .                  | .      |
| .                  | .            | . | .                  | .                  | .      |
| .                  | .            | . | .                  | .                  | .      |
| Vv18g0134          | .            | . | .                  | .                  | .      |
| .                  | .            | . | .                  | .                  | .      |
| .                  | .            | . | .                  | .                  | .      |
| Vv18g0135          | .            | . | .                  | .                  | .      |
| .                  | .            | . | .                  | .                  | .      |
| .                  | .            | . | .                  | .                  | .      |
| Vv18g0136          | Tc08_g004720 | . | .                  | Gorai.009G188600.1 | .      |
| .                  | .            | . | .                  | .                  | .      |
| .                  | .            | . | .                  | .                  | .      |
| Vv18g0137          | Tc08_g004710 | . | Gorai.002G118800.1 | .                  | .      |
| Gorai.009G188700.1 | .            | . | .                  | .                  | .      |
| .                  | .            | . | .                  | .                  | .      |
| .                  | .            | . | .                  | .                  | .      |
| Vv18g0138          | .            | . | .                  | .                  | .      |
| .                  | .            | . | .                  | .                  | .      |
| .                  | .            | . | .                  | .                  | .      |
| Vv18g0139          | Tc08_g004660 | . | Gorai.002G119100.1 | .                  | .      |
| Gorai.009G188900.1 | .            | . | Vv03g0311          | .                  | .      |
| .                  | .            | . | .                  | .                  | .      |
| .                  | .            | . | .                  | .                  | .      |

|                    |                    |                    |   |                    |   |           |   |
|--------------------|--------------------|--------------------|---|--------------------|---|-----------|---|
| Vv18g0140          | .                  | .                  | . | .                  | . | .         | . |
| .                  | .                  | .                  | . | .                  | . | .         | . |
| Vv18g0141          | .                  | .                  | . | .                  | . | .         | . |
| .                  | .                  | .                  | . | .                  | . | .         | . |
| Vv18g0142          | .                  | .                  | . | .                  | . | .         | . |
| .                  | .                  | .                  | . | .                  | . | .         | . |
| Vv18g0143          | Tc08_g004630       | .                  | . | Gorai.005G113500.1 | . | .         | . |
| .                  | .                  | .                  | . | .                  | . | .         | . |
| Vv18g0144          | Tc08_g004620       | Gorai.002G119500.1 | . | Gorai.             | . | .         | . |
| 005G113000.1       | .                  | .                  | . | .                  | . | .         | . |
| .                  | .                  | .                  | . | .                  | . | .         | . |
| Vv18g0145          | .                  | .                  | . | .                  | . | .         | . |
| .                  | .                  | .                  | . | .                  | . | .         | . |
| Vv18g0146          | Tc08_g004590       | .                  | . | .                  | . | .         | . |
| .                  | .                  | .                  | . | .                  | . | .         | . |
| Vv18g0147          | .                  | .                  | . | .                  | . | .         | . |
| .                  | .                  | .                  | . | .                  | . | .         | . |
| Vv18g0148          | Tc08_g004580       | .                  | . | .                  | . | .         | . |
| .                  | .                  | .                  | . | .                  | . | .         | . |
| Vv18g0149          | Tc08_g004560       | .                  | . | Gorai.005G112900.1 | . | .         | . |
| Gorai.009G189400.1 | Gorai.009G267900.1 | .                  | . | .                  | . | .         | . |
| .                  | .                  | .                  | . | .                  | . | .         | . |
| Vv18g0150          | .                  | .                  | . | .                  | . | .         | . |
| .                  | .                  | .                  | . | .                  | . | .         | . |
| Vv18g0151          | .                  | .                  | . | .                  | . | .         | . |
| .                  | .                  | .                  | . | .                  | . | .         | . |
| Vv18g0152          | Tc08_g004540       | .                  | . | Gorai.009G189600.1 | . | .         | . |
| .                  | .                  | .                  | . | .                  | . | .         | . |
| Vv18g0153          | Tc08_g004530       | Gorai.002G119700.1 | . | .                  | . | .         | . |
| .                  | .                  | .                  | . | .                  | . | .         | . |
| .                  | Vv04g1420          | Tc01_g010700       | . | .                  | . | .         | . |
| .                  | .                  | .                  | . | .                  | . | .         | . |
| Vv18g0154          | .                  | .                  | . | .                  | . | Vv04g1419 | . |
| .                  | .                  | .                  | . | .                  | . | .         | . |
| Vv18g0155          | .                  | .                  | . | .                  | . | .         | . |
| .                  | .                  | .                  | . | .                  | . | .         | . |



|                    |                    |                    |   |                    |
|--------------------|--------------------|--------------------|---|--------------------|
| Vv18g0156          | Tc08_g004510       | .                  | . | Gorai.009G189800.1 |
| .                  | .                  | .                  | . | .                  |
| Vv18g0157          | .                  | .                  | . | .                  |
| .                  | .                  | .                  | . | .                  |
| Vv18g0158          | Tc08_g004490       | Gorai.002G120000.1 | . | .                  |
| Gorai.009G189900.1 | Gorai.009G268100.1 | .                  | . | .                  |
| .                  | .                  | .                  | . | .                  |
| Vv18g0159          | Tc08_g004480       | .                  | . | Gorai.009G190000.1 |
| Gorai.009G268200.1 | .                  | .                  | . | .                  |
| .                  | .                  | .                  | . | .                  |
| Vv18g0160          | Tc08_g004470       | .                  | . | .                  |
| .                  | .                  | .                  | . | .                  |
| Vv18g0161          | .                  | .                  | . | Gorai.009G268300.1 |
| .                  | .                  | .                  | . | .                  |
| Vv18g0162          | Tc08_g004460       | .                  | . | Gorai.009G190100.1 |
| .                  | .                  | .                  | . | .                  |
| Vv18g0163          | Tc08_g004450       | Gorai.002G120100.1 | . | .                  |
| .                  | .                  | .                  | . | .                  |
| Vv18g0164          | Tc08_g004430       | .                  | . | Gorai.009G190200.1 |
| .                  | .                  | .                  | . | .                  |
| Vv18g0165          | Tc08_g004420       | .                  | . | Gorai.             |
| 009G268400.1       | Gorai.010G001000.1 | .                  | . | .                  |
| .                  | .                  | .                  | . | .                  |
| Vv18g0166          | .                  | .                  | . | .                  |
| .                  | .                  | .                  | . | .                  |
| Vv18g0167          | .                  | .                  | . | .                  |
| .                  | .                  | .                  | . | .                  |
| Vv18g0168          | Tc08_g004400       | Gorai.002G120400.1 | . | .                  |
| .                  | .                  | .                  | . | .                  |
| Vv18g0169          | Tc08_g004390       | Gorai.002G120500.1 | . | .                  |
| .                  | .                  | .                  | . | .                  |
| Vv18g0170          | Tc08_g004380       | Gorai.002G120600.1 | . | .                  |
| .                  | .                  | .                  | . | .                  |
| Vv18g0171          | Tc08_g004370       | .                  | . | Gorai.009G190400.1 |

|                    |                    |                    |   |                    |   |
|--------------------|--------------------|--------------------|---|--------------------|---|
| .                  | .                  | .                  | . | .                  | . |
| .                  | Vv04g1409          | Tc01_g000500       | . | .                  | . |
| Vv18g0172          | Tc08_g004350       | .                  | . | .                  | . |
| .                  | .                  | .                  | . | .                  | . |
| Vv18g0173          | Tc08_g004340       | .                  | . | .                  | . |
| .                  | .                  | .                  | . | .                  | . |
| Vv18g0174          | Tc08_g004330       | .                  | . | Gorai.009G190500.1 | . |
| .                  | Vv03g0272          | Tc02_g004330       | . | .                  | . |
| .                  | .                  | .                  | . | .                  | . |
| Vv18g0175          | .                  | .                  | . | .                  | . |
| .                  | .                  | .                  | . | .                  | . |
| Vv18g0176          | Tc08_g004310       | .                  | . | .                  | . |
| .                  | .                  | .                  | . | .                  | . |
| Vv18g0177          | Tc08_g004300       | Gorai.002G120700.1 | . | .                  | . |
| .                  | .                  | .                  | . | .                  | . |
| Vv18g0178          | .                  | .                  | . | .                  | . |
| .                  | .                  | .                  | . | .                  | . |
| Vv18g0179          | Tc08_g004290       | .                  | . | Gorai.009G190800.1 | . |
| .                  | .                  | .                  | . | .                  | . |
| Vv18g0180          | .                  | .                  | . | Gorai.009G268500.1 | . |
| .                  | .                  | .                  | . | .                  | . |
| Vv04g1378          | Tc01_g001040       | .                  | . | Gorai.008G061600.1 | . |
| .                  | .                  | .                  | . | .                  | . |
| Vv18g0181          | Tc08_g004280       | Gorai.002G120800.1 | . | .                  | . |
| .                  | .                  | .                  | . | .                  | . |
| .                  | Vv04g1376          | .                  | . | .                  | . |
| Gorai.003G005500.1 | .                  | .                  | . | .                  | . |
| Vv18g0182          | .                  | .                  | . | .                  | . |
| .                  | .                  | .                  | . | .                  | . |
| Vv18g0183          | Tc08_g004270       | Gorai.002G120900.1 | . | .                  | . |
| Gorai.009G190900.1 | .                  | .                  | . | Vv03g0260          | . |
| Tc02_g004390       | Gorai.002G200900.1 | Gorai.005G255500.1 | . | .                  | . |
| Gorai.008G037600.1 | .                  | .                  | . | .                  | . |
| .                  | .                  | .                  | . | .                  | . |
| Vv18g0184          | Tc08_g004260       | .                  | . | Gorai.009G191000.1 | . |
| Gorai.009G268600.1 | .                  | .                  | . | Vv03g0259          | . |
| .                  | .                  | .                  | . | .                  | . |
| .                  | .                  | .                  | . | .                  | . |
| Vv18g0185          | Tc08_g004250       | .                  | . | Gorai.009G191100.1 | . |
| .                  | .                  | .                  | . | .                  | . |

|                    |                    |                    |                    |                    |                    |           |   |
|--------------------|--------------------|--------------------|--------------------|--------------------|--------------------|-----------|---|
| Vv18g0186          | .                  | .                  | .                  | .                  | .                  | .         | . |
| .                  | .                  | .                  | .                  | .                  | .                  | .         | . |
| Vv18g0187          | Tc08_g004240       | .                  | .                  | .                  | Gorai.009G191200.1 | .         | . |
| Gorai.009G268900.1 | .                  | .                  | .                  | .                  | .                  | .         | . |
| .                  | .                  | .                  | .                  | .                  | .                  | .         | . |
| Vv18g0188          | .                  | .                  | .                  | .                  | .                  | .         | . |
| .                  | .                  | .                  | .                  | .                  | .                  | .         | . |
| Vv18g0189          | .                  | .                  | .                  | .                  | .                  | .         | . |
| .                  | .                  | .                  | .                  | .                  | .                  | .         | . |
| Vv18g0190          | .                  | .                  | .                  | .                  | .                  | .         | . |
| .                  | .                  | .                  | .                  | .                  | .                  | Vv04g1374 | . |
| .                  | .                  | .                  | Gorai.007G190500.1 | .                  | .                  | Gorai.    | . |
| 003G005700.1       | .                  | .                  | .                  | .                  | .                  | .         | . |
| Vv18g0191          | .                  | .                  | .                  | .                  | .                  | .         | . |
| .                  | .                  | .                  | .                  | .                  | .                  | Vv04g1373 | . |
| .                  | .                  | .                  | .                  | .                  | .                  | .         | . |
| Vv18g0192          | .                  | .                  | .                  | .                  | .                  | .         | . |
| .                  | .                  | .                  | .                  | .                  | .                  | .         | . |
| Vv18g0193          | Tc08_g004220       | .                  | .                  | .                  | Gorai.009G191300.1 | .         | . |
| .                  | .                  | .                  | .                  | .                  | .                  | .         | . |
| Vv18g0194          | Tc08_g004200       | .                  | .                  | .                  | .                  | .         | . |
| Vv03g0252          | Tc02_g004550       | Gorai.002G200500.1 | .                  | .                  | .                  | .         | . |
| Gorai.005G255100.1 | Gorai.002G002200.1 | .                  | .                  | .                  | .                  | .         | . |
| .                  | .                  | .                  | .                  | .                  | .                  | .         | . |
| Vv18g0195          | Tc08_g004190       | .                  | .                  | Gorai.005G112700.1 | .                  | .         | . |
| Gorai.009G191400.1 | Gorai.009G269000.1 | .                  | .                  | .                  | .                  | .         | . |
| .                  | .                  | .                  | .                  | .                  | Vv04g1371          | .         | . |
| Tc01_g001090       | Gorai.008G061800.1 | .                  | .                  | Gorai.007G190600.1 | .                  | .         | . |
| .                  | .                  | .                  | .                  | .                  | .                  | .         | . |
| Vv18g0196          | Tc08_g004180       | .                  | .                  | .                  | .                  | .         | . |
| .                  | .                  | .                  | .                  | .                  | .                  | .         | . |
| Vv18g0197          | .                  | .                  | .                  | .                  | .                  | .         | . |
| .                  | .                  | .                  | .                  | .                  | .                  | .         | . |
| Vv18g0198          | Tc08_g004170       | .                  | .                  | Gorai.009G191500.1 | .                  | .         | . |
| .                  | Gorai.010G001300.1 | .                  | .                  | .                  | .                  | .         | . |
| .                  | .                  | .                  | .                  | .                  | .                  | .         | . |
| Vv18g0199          | Tc08_g004150       | Gorai.002G121100.1 | .                  | .                  | .                  | .         | . |
| Gorai.009G269100.1 | .                  | Vv03g0245          | .                  | .                  | .                  | .         | . |
| .                  | .                  | .                  | .                  | .                  | .                  | .         | . |
| .                  | .                  | .                  | .                  | .                  | .                  | .         | . |

|                    |                    |                    |                    |
|--------------------|--------------------|--------------------|--------------------|
| Vv18g0200          | Tc08_g004140       | Gorai.002G121200.1 | Gorai.             |
| 005G109800.1       | Gorai.009G191800.1 | .                  | .                  |
| .                  | .                  | .                  | .                  |
| Vv18g0201          | Tc08_g008510       | .                  | .                  |
| Gorai.010G001500.1 | .                  | .                  | .                  |
| .                  | .                  | .                  | .                  |
| Vv18g0202          | .                  | Gorai.009G191900.1 | .                  |
| .                  | .                  | .                  | .                  |
| .                  | .                  | .                  | .                  |
| Vv18g0203          | Tc08_g004130       | .                  | .                  |
| .                  | .                  | .                  | .                  |
| .                  | .                  | .                  | .                  |
| Vv18g0204          | .                  | .                  | .                  |
| .                  | .                  | .                  | .                  |
| .                  | .                  | .                  | .                  |
| Vv18g0205          | Tc08_g004120       | .                  | .                  |
| Gorai.010G001700.1 | .                  | .                  | .                  |
| .                  | .                  | .                  | .                  |
| Vv18g0206          | Tc08_g004090       | Gorai.002G121600.1 | .                  |
| Gorai.009G192000.1 | .                  | .                  | .                  |
| .                  | .                  | Vv07g1282          | Gorai.             |
| 007G063100.1       | .                  | .                  | .                  |
| Vv18g0207          | .                  | .                  | .                  |
| .                  | .                  | .                  | .                  |
| .                  | .                  | .                  | .                  |
| Vv18g0208          | .                  | .                  | .                  |
| Vv03g0229          | Gorai.002G199300.1 | .                  | .                  |
| .                  | .                  | .                  | .                  |
| Vv18g0209          | Tc08_g004080       | .                  | .                  |
| Vv03g0228          | Tc02_g004740       | Gorai.002G199200.1 | .                  |
| .                  | Gorai.008G037000.1 | .                  | .                  |
| .                  | .                  | .                  | .                  |
| Vv18g0210          | Tc08_g004070       | .                  | Gorai.009G192100.1 |
| Gorai.009G269200.1 | .                  | Gorai.010G001800.1 | .                  |
| .                  | .                  | .                  | .                  |
| .                  | .                  | .                  | .                  |
| Vv18g0211          | Tc08_g004060       | .                  | Gorai.009G192200.1 |
| .                  | Gorai.010G001900.1 | .                  | .                  |
| .                  | .                  | .                  | .                  |
| .                  | .                  | .                  | .                  |
| Vv18g0212          | Tc08_g004030       | .                  | Gorai.009G192400.1 |
| .                  | .                  | .                  | .                  |
| .                  | .                  | .                  | .                  |
| Vv18g0213          | .                  | Gorai.009G250700.1 | .                  |
| .                  | .                  | .                  | .                  |
| .                  | .                  | .                  | .                  |
| Vv18g0214          | .                  | .                  | .                  |
| .                  | .                  | .                  | .                  |
| .                  | .                  | .                  | .                  |

|                    |              |   |   |                    |   |   |   |
|--------------------|--------------|---|---|--------------------|---|---|---|
| Vv18g0215          | .            | . | . | .                  | . | . | . |
| .                  | .            | . | . | .                  | . | . | . |
| Vv18g0216          | .            | . | . | .                  | . | . | . |
| .                  | .            | . | . | .                  | . | . | . |
| Vv18g0217          | .            | . | . | .                  | . | . | . |
| .                  | .            | . | . | .                  | . | . | . |
| Vv18g0218          | Tc08_g008900 | . | . | Gorai.005G086100.1 | . | . | . |
| Gorai.009G250600.1 | .            | . | . | .                  | . | . | . |
| .                  | .            | . | . | .                  | . | . | . |
| Vv18g0219          | .            | . | . | .                  | . | . | . |
| .                  | .            | . | . | .                  | . | . | . |
| Vv18g0220          | .            | . | . | .                  | . | . | . |
| .                  | .            | . | . | .                  | . | . | . |
| Vv18g0221          | .            | . | . | .                  | . | . | . |
| .                  | .            | . | . | .                  | . | . | . |
| Vv18g0222          | .            | . | . | .                  | . | . | . |
| .                  | .            | . | . | .                  | . | . | . |
| Vv18g0223          | .            | . | . | .                  | . | . | . |
| .                  | .            | . | . | .                  | . | . | . |
| Vv18g0224          | .            | . | . | .                  | . | . | . |
| .                  | .            | . | . | .                  | . | . | . |
| Vv18g0225          | .            | . | . | .                  | . | . | . |
| .                  | .            | . | . | .                  | . | . | . |
| Vv18g0226          | .            | . | . | .                  | . | . | . |
| .                  | .            | . | . | .                  | . | . | . |
| Vv18g0227          | .            | . | . | .                  | . | . | . |
| .                  | .            | . | . | .                  | . | . | . |
| Vv18g0228          | .            | . | . | .                  | . | . | . |
| .                  | .            | . | . | .                  | . | . | . |
| Vv18g0229          | Tc08_g011790 | . | . | .                  | . | . | . |
| .                  | .            | . | . | .                  | . | . | . |
| Vv18g0230          | .            | . | . | .                  | . | . | . |
| .                  | .            | . | . | .                  | . | . | . |
| Vv18g0231          | .            | . | . | .                  | . | . | . |

|                           |                                    |   |                    |                                 |
|---------------------------|------------------------------------|---|--------------------|---------------------------------|
| Vv18g0232                 | Tc08_g011440<br>Gorai.010G050100.1 | . | .                  | Gorai.009G249600.1<br>Vv07g1310 |
| Vv18g0233                 | .                                  | . | .                  | Gorai.009G249500.1              |
| Vv18g0234                 | .                                  | . | .                  | Gorai.009G249400.1              |
| Vv18g0235                 | .                                  | . | .                  | .                               |
| Vv18g0236<br>009G249300.1 | .                                  | . | Gorai.005G087000.1 | Gorai.                          |
| Vv18g0237<br>009G249200.1 | .                                  | . | Gorai.005G087100.1 | Gorai.                          |
| Vv18g0238                 | .                                  | . | Gorai.005G087200.1 | .                               |
| Vv18g0239                 | .                                  | . | .                  | .                               |
| Vv18g0240                 | .                                  | . | .                  | .                               |
| Vv18g0241                 | .                                  | . | Gorai.009G249000.1 | .                               |
| Vv18g0242                 | .                                  | . | .                  | .                               |
| Vv18g0243                 | .                                  | . | .                  | .                               |
| Vv18g0244<br>009G248900.1 | .                                  | . | Gorai.005G087500.1 | Gorai.                          |
| Vv18g0245                 | .                                  | . | .                  | .                               |
| Vv18g0246                 | Tc08_g002950<br>Gorai.009G271100.1 | . | Gorai.005G087600.1 | .                               |

|           |                    |              |                    |  |  |  |
|-----------|--------------------|--------------|--------------------|--|--|--|
| Vv18g0247 |                    |              |                    |  |  |  |
| Vv18g0248 |                    |              | Gorai.005G087700.1 |  |  |  |
| Vv18g0249 |                    |              | Gorai.005G087800.1 |  |  |  |
| Vv18g0250 |                    |              |                    |  |  |  |
| Vv18g0251 |                    |              | Gorai.009G248800.1 |  |  |  |
| Vv18g0252 |                    |              |                    |  |  |  |
| Vv18g0253 |                    |              |                    |  |  |  |
| Vv07g1318 |                    |              |                    |  |  |  |
| Vv18g0254 |                    |              |                    |  |  |  |
| Vv18g0255 | Tc08_g000320       |              | Gorai.005G088100.1 |  |  |  |
| Vv18g0256 |                    |              |                    |  |  |  |
| Vv18g0257 | Tc08_g000220       |              | Gorai.009G213700.1 |  |  |  |
|           | Gorai.009G276000.1 |              |                    |  |  |  |
| Vv18g0258 |                    |              |                    |  |  |  |
| Vv18g0259 |                    |              | Gorai.009G195000.1 |  |  |  |
| Vv18g0260 |                    |              |                    |  |  |  |
| Vv18g0261 |                    |              | Gorai.009G248600.1 |  |  |  |
|           | Vv07g1321          | Tc01_g012580 |                    |  |  |  |
| Vv18g0262 |                    |              | Gorai.009G248500.1 |  |  |  |

|                    |                    |              |                    |   |   |        |   |
|--------------------|--------------------|--------------|--------------------|---|---|--------|---|
| .                  | .                  | .            | .                  | . | . | .      | . |
| Vv18g0263          | .                  | .            | Gorai.005G088400.1 | . | . | .      | . |
| .                  | .                  | .            | .                  | . | . | .      | . |
| Vv18g0264          | .                  | .            | .                  | . | . | Gorai. | . |
| 010G053300.1       | .                  | .            | .                  | . | . | .      | . |
| .                  | .                  | .            | .                  | . | . | .      | . |
| Vv18g0265          | .                  | .            | Gorai.009G248300.1 | . | . | .      | . |
| Gorai.010G052900.1 | .                  | .            | .                  | . | . | .      | . |
| .                  | .                  | .            | .                  | . | . | .      | . |
| Vv18g0266          | Tc08_g011050       | .            | .                  | . | . | .      | . |
| Gorai.010G052800.1 | Vv04g1342          | Tc01_g001390 | .                  | . | . | .      | . |
| .                  | Gorai.011G098200.1 | .            | .                  | . | . | .      | . |
| .                  | .                  | .            | .                  | . | . | .      | . |
| Vv18g0267          | .                  | .            | Gorai.009G248100.1 | . | . | .      | . |
| .                  | .                  | .            | .                  | . | . | .      | . |
| Vv18g0268          | .                  | .            | .                  | . | . | Gorai. | . |
| 010G052500.1       | .                  | .            | .                  | . | . | .      | . |
| .                  | .                  | .            | .                  | . | . | .      | . |
| Vv18g0269          | .                  | .            | .                  | . | . | .      | . |
| .                  | .                  | .            | .                  | . | . | .      | . |
| Vv18g0270          | .                  | .            | .                  | . | . | .      | . |
| .                  | .                  | .            | .                  | . | . | .      | . |
| Vv18g0271          | .                  | .            | .                  | . | . | .      | . |
| .                  | .                  | .            | .                  | . | . | .      | . |
| Vv18g0272          | .                  | .            | Gorai.005G088500.1 | . | . | .      | . |
| Gorai.009G284000.1 | .                  | .            | .                  | . | . | .      | . |
| .                  | .                  | .            | .                  | . | . | .      | . |
| Vv18g0273          | .                  | .            | .                  | . | . | .      | . |
| .                  | .                  | .            | .                  | . | . | .      | . |
| Vv18g0274          | .                  | .            | Gorai.009G248000.1 | . | . | .      | . |
| .                  | .                  | .            | .                  | . | . | .      | . |
| Vv18g0275          | Tc08_g010990       | .            | .                  | . | . | .      | . |
| Gorai.010G052300.1 | Vv04g1350          | .            | .                  | . | . | .      | . |
| .                  | Vv07g1326          | Tc01_g012690 | .                  | . | . | .      | . |
| .                  | .                  | .            | .                  | . | . | .      | . |
| Vv18g0276          | Tc08_g010980       | .            | .                  | . | . | .      | . |
| Gorai.010G052200.1 | Vv04g1351          | .            | .                  | . | . | .      | . |
| .                  | Vv07g1337          | Tc01_g012700 | .                  | . | . | .      | . |
| .                  | .                  | .            | .                  | . | . | .      | . |
| Vv18g0277          | .                  | .            | Gorai.005G088700.1 | . | . | .      | . |



|                    |                    |                    |                    |   |   |
|--------------------|--------------------|--------------------|--------------------|---|---|
| Gorai.009G283900.1 |                    | Gorai.010G052100.1 | .                  | . | . |
| .                  | .                  | .                  | .                  | . | . |
| Vv18g0278          | .                  | .                  | .                  | . | . |
| .                  | .                  | .                  | .                  | . | . |
| Vv18g0279          | .                  | .                  | Gorai.009G247900.1 | . | . |
| .                  | .                  | .                  | .                  | . | . |
| Vv18g0280          | .                  | .                  | .                  | . | . |
| .                  | .                  | .                  | .                  | . | . |
| Vv18g0281          | Tc08_g000180       | .                  | .                  | . | . |
| .                  | .                  | .                  | .                  | . | . |
| Vv18g0282          | .                  | .                  | .                  | . | . |
| .                  | .                  | .                  | .                  | . | . |
| Vv18g0283          | .                  | .                  | Gorai.009G247700.1 | . | . |
| Gorai.010G051700.1 | .                  | .                  | .                  | . | . |
| .                  | .                  | .                  | .                  | . | . |
| Vv18g0284          | Tc08_g010880       | .                  | Gorai.009G247600.1 | . | . |
| .                  | .                  | .                  | .                  | . | . |
| Vv18g0285          | Tc08_g003030       | .                  | .                  | . | . |
| .                  | .                  | .                  | .                  | . | . |
| Vv18g0286          | .                  | Gorai.005G089000.1 | .                  | . | . |
| .                  | .                  | .                  | .                  | . | . |
| Vv07g1339          | Tc01_g012720       | .                  | .                  | . | . |
| .                  | .                  | .                  | .                  | . | . |
| Vv18g0287          | .                  | Gorai.005G089100.1 | Gorai.             | . | . |
| 009G247000.1       | .                  | Gorai.010G051500.1 | .                  | . | . |
| .                  | .                  | .                  | Vv07g1342          | . | . |
| Tc01_g012750       | .                  | .                  | .                  | . | . |
| Vv18g0288          | .                  | .                  | Gorai.009G246900.1 | . | . |
| Gorai.010G051400.1 | .                  | .                  | .                  | . | . |
| .                  | .                  | .                  | .                  | . | . |
| Vv18g0289          | .                  | .                  | Gorai.009G246800.1 | . | . |
| .                  | .                  | .                  | .                  | . | . |
| Vv07g1346          | Tc01_g012790       | .                  | .                  | . | . |
| .                  | .                  | .                  | .                  | . | . |
| Vv18g0290          | .                  | Gorai.005G089200.1 | Gorai.             | . | . |
| 009G246700.1       | Gorai.009G283800.1 | .                  | .                  | . | . |
| .                  | .                  | .                  | Vv07g1348          | . | . |
| .                  | .                  | .                  | .                  | . | . |
| Vv18g0291          | .                  | .                  | Gorai.009G246600.1 | . | . |
| Gorai.010G051300.1 | .                  | .                  | .                  | . | . |

|                    |              |   |   |                    |                    |        |   |
|--------------------|--------------|---|---|--------------------|--------------------|--------|---|
| .                  | .            | . | . | .                  | .                  | .      | . |
| .                  | .            | . | . | .                  | .                  | .      | . |
| Vv18g0292          | .            | . | . | .                  | .                  | .      | . |
| .                  | .            | . | . | .                  | .                  | .      | . |
| Vv18g0293          | .            | . | . | .                  | Gorai.009G246300.1 | .      | . |
| Gorai.010G051100.1 | .            | . | . | .                  | .                  | .      | . |
| .                  | .            | . | . | .                  | .                  | .      | . |
| .                  | .            | . | . | .                  | .                  | .      | . |
| Vv18g0294          | .            | . | . | .                  | .                  | .      | . |
| .                  | .            | . | . | .                  | .                  | .      | . |
| .                  | .            | . | . | .                  | .                  | .      | . |
| Vv18g0295          | .            | . | . | .                  | .                  | .      | . |
| .                  | .            | . | . | .                  | .                  | .      | . |
| .                  | .            | . | . | .                  | .                  | .      | . |
| Vv18g0296          | .            | . | . | .                  | .                  | Gorai. | . |
| 010G051000.1       | .            | . | . | .                  | .                  | .      | . |
| .                  | .            | . | . | .                  | .                  | .      | . |
| Vv18g0297          | .            | . | . | .                  | .                  | .      | . |
| .                  | .            | . | . | .                  | .                  | .      | . |
| .                  | .            | . | . | .                  | .                  | .      | . |
| Vv18g0298          | Tc08_g003070 | . | . | .                  | .                  | .      | . |
| .                  | .            | . | . | .                  | .                  | .      | . |
| .                  | .            | . | . | .                  | .                  | .      | . |
| Vv18g0299          | Tc08_g010510 | . | . | Gorai.005G089300.1 | .                  | .      | . |
| .                  | .            | . | . | .                  | .                  | .      | . |
| .                  | .            | . | . | .                  | .                  | .      | . |
| Vv18g0300          | .            | . | . | .                  | .                  | Gorai. | . |
| 010G050500.1       | .            | . | . | .                  | .                  | .      | . |
| .                  | .            | . | . | .                  | .                  | .      | . |
| Vv18g0301          | .            | . | . | Gorai.005G089400.1 | Gorai.             | .      | . |
| 009G246000.1       | .            | . | . | .                  | .                  | .      | . |
| .                  | .            | . | . | .                  | .                  | .      | . |
| .                  | .            | . | . | .                  | .                  | .      | . |
| Vv18g0302          | .            | . | . | .                  | Gorai.009G283400.1 | .      | . |
| .                  | .            | . | . | .                  | .                  | .      | . |
| .                  | .            | . | . | .                  | .                  | .      | . |
| Vv18g0303          | Tc08_g003390 | . | . | .                  | Gorai.009G245900.1 | .      | . |
| Gorai.009G280500.1 | .            | . | . | Gorai.010G050400.1 | .                  | .      | . |
| .                  | .            | . | . | .                  | Vv07g1355          | .      | . |
| Tc01_g012870       | .            | . | . | .                  | .                  | .      | . |
| Vv18g0304          | .            | . | . | .                  | Gorai.009G245800.1 | .      | . |
| .                  | .            | . | . | .                  | .                  | .      | . |
| .                  | .            | . | . | .                  | .                  | .      | . |
| Vv18g0305          | .            | . | . | .                  | .                  | Gorai. | . |
| 010G050300.1       | Vv04g1372    | . | . | Tc01_g001070       | .                  | .      | . |
| Gorai.003G005800.1 | .            | . | . | Vv07g1360          | .                  | .      | . |
| Tc01_g020690       | .            | . | . | .                  | .                  | .      | . |
| Vv18g0306          | .            | . | . | .                  | .                  | .      | . |
| .                  | .            | . | . | .                  | .                  | .      | . |

|                    |                    |   |   |                    |                    |           |   |
|--------------------|--------------------|---|---|--------------------|--------------------|-----------|---|
| Vv18g0307          | .                  | . | . | .                  | .                  | .         | . |
| .                  | .                  | . | . | .                  | .                  | .         | . |
| Vv18g0308          | .                  | . | . | .                  | .                  | .         | . |
| .                  | .                  | . | . | .                  | .                  | .         | . |
| Vv18g0309          | .                  | . | . | Gorai.005G089800.1 | .                  | Gorai.    | . |
| 009G245700.1       | .                  | . | . | .                  | .                  | .         | . |
| .                  | .                  | . | . | .                  | .                  | .         | . |
| Vv18g0310          | Tc08_g010480       | . | . | .                  | Gorai.009G245600.1 | .         | . |
| .                  | Gorai.010G050200.1 | . | . | .                  | .                  | .         | . |
| .                  | .                  | . | . | .                  | .                  | .         | . |
| Vv18g0311          | .                  | . | . | .                  | .                  | .         | . |
| .                  | .                  | . | . | .                  | .                  | .         | . |
| Vv18g0312          | .                  | . | . | .                  | .                  | .         | . |
| .                  | .                  | . | . | .                  | .                  | .         | . |
| Vv18g0313          | .                  | . | . | .                  | .                  | .         | . |
| .                  | .                  | . | . | .                  | .                  | .         | . |
| Vv18g0314          | .                  | . | . | .                  | .                  | .         | . |
| .                  | .                  | . | . | .                  | .                  | .         | . |
| Vv18g0315          | .                  | . | . | .                  | .                  | Gorai.    | . |
| 010G050000.1       | .                  | . | . | .                  | .                  | .         | . |
| .                  | .                  | . | . | .                  | .                  | .         | . |
| Vv18g0316          | .                  | . | . | Gorai.005G089900.1 | .                  | Gorai.    | . |
| 009G245400.1       | .                  | . | . | .                  | .                  | .         | . |
| .                  | .                  | . | . | .                  | .                  | .         | . |
| Vv18g0317          | .                  | . | . | Gorai.005G090000.1 | .                  | .         | . |
| Gorai.010G049900.1 | .                  | . | . | .                  | .                  | .         | . |
| .                  | .                  | . | . | .                  | .                  | .         | . |
| Vv18g0318          | .                  | . | . | .                  | .                  | Gorai.    | . |
| 010G049800.1       | .                  | . | . | .                  | .                  | .         | . |
| .                  | .                  | . | . | .                  | .                  | .         | . |
| Vv18g0319          | .                  | . | . | .                  | .                  | Gorai.    | . |
| 010G049700.1       | .                  | . | . | .                  | .                  | .         | . |
| .                  | .                  | . | . | .                  | .                  | .         | . |
| Vv18g0320          | .                  | . | . | .                  | .                  | .         | . |
| .                  | .                  | . | . | .                  | .                  | Vv07g1375 | . |
| Tc01_g013040       | .                  | . | . | .                  | .                  | .         | . |
| Vv18g0321          | .                  | . | . | .                  | .                  | .         | . |
| .                  | .                  | . | . | .                  | .                  | .         | . |
| .                  | .                  | . | . | .                  | .                  | .         | . |

|                    |              |   |                    |                    |        |
|--------------------|--------------|---|--------------------|--------------------|--------|
| Vv18g0322          | .            | . | .                  | Gorai.009G245300.1 | .      |
| .                  | .            | . | .                  | .                  | .      |
| Vv18g0323          | .            | . | .                  | .                  | .      |
| .                  | .            | . | .                  | .                  | .      |
| Vv18g0324          | .            | . | .                  | Gorai.009G245200.1 | .      |
| .                  | .            | . | .                  | .                  | .      |
| Vv18g0325          | .            | . | .                  | Gorai.009G245100.1 | .      |
| Gorai.010G049600.1 | .            | . | .                  | .                  | .      |
| .                  | .            | . | .                  | .                  | .      |
| Vv18g0326          | .            | . | .                  | .                  | Gorai. |
| 010G049400.1       | .            | . | .                  | .                  | .      |
| .                  | .            | . | .                  | .                  | .      |
| Vv18g0327          | .            | . | .                  | .                  | .      |
| .                  | .            | . | .                  | .                  | .      |
| Vv18g0328          | .            | . | .                  | .                  | .      |
| Vv04g1408          | .            | . | .                  | .                  | .      |
| .                  | .            | . | .                  | .                  | .      |
| Vv18g0329          | .            | . | .                  | .                  | .      |
| Vv04g1436          | Tc01_g010750 | . | .                  | .                  | .      |
| Vv1rg0413          | .            | . | .                  | .                  | .      |
| Vv18g0330          | .            | . | .                  | .                  | .      |
| Vv04g1441          | .            | . | .                  | .                  | .      |
| Vv1rg0409          | .            | . | .                  | .                  | .      |
| Vv18g0331          | .            | . | .                  | Gorai.009G244600.1 | .      |
| .                  | .            | . | .                  | .                  | .      |
| .                  | .            | . | .                  | .                  | .      |
| Vv18g0332          | .            | . | .                  | .                  | Gorai. |
| 010G049000.1       | .            | . | .                  | .                  | .      |
| .                  | .            | . | .                  | .                  | .      |
| Vv18g0333          | .            | . | .                  | .                  | .      |
| .                  | .            | . | .                  | .                  | .      |
| Vv18g0334          | .            | . | .                  | .                  | .      |
| .                  | .            | . | .                  | .                  | .      |
| Vv18g0335          | .            | . | .                  | .                  | .      |
| .                  | .            | . | .                  | .                  | .      |
| Vv18g0336          | .            | . | .                  | Gorai.009G244500.1 | .      |
| Gorai.010G048900.1 | .            | . | .                  | .                  | .      |
| .                  | .            | . | .                  | .                  | .      |
| .                  | .            | . | .                  | .                  | .      |
| Vv18g0337          | .            | . | Gorai.005G090400.1 | Gorai.             | .      |
| 009G244400.1       | .            | . | .                  | .                  | .      |
| .                  | .            | . | .                  | .                  | .      |

|                    |              |   |                    |   |   |
|--------------------|--------------|---|--------------------|---|---|
| Vv18g0338          | .            | . | Gorai.005G090500.1 | . | . |
| .                  | .            | . | .                  | . | . |
| Vv18g0339          | .            | . | .                  | . | . |
| .                  | .            | . | .                  | . | . |
| Vv18g0340          | .            | . | Gorai.009G244300.1 | . | . |
| Gorai.010G048700.1 | .            | . | .                  | . | . |
| .                  | .            | . | .                  | . | . |
| Vv18g0341          | .            | . | Gorai.005G090600.1 | . | . |
| .                  | .            | . | .                  | . | . |
| Vv18g0342          | Tc08_g010330 | . | .                  | . | . |
| Vv04g1469          | .            | . | .                  | . | . |
| .                  | .            | . | .                  | . | . |
| Vv18g0343          | Tc08_g010320 | . | Gorai.009G244100.1 | . | . |
| .                  | .            | . | .                  | . | . |
| Vv18g0344          | Tc08_g010300 | . | Gorai.009G244000.1 | . | . |
| .                  | .            | . | .                  | . | . |
| Vv18g0345          | Tc08_g010290 | . | .                  | . | . |
| .                  | .            | . | .                  | . | . |
| Vv18g0346          | .            | . | Gorai.009G243900.1 | . | . |
| .                  | .            | . | .                  | . | . |
| Vv18g0347          | Tc08_g010280 | . | Gorai.009G243800.1 | . | . |
| Gorai.010G048500.1 | .            | . | .                  | . | . |
| .                  | .            | . | .                  | . | . |
| Vv18g0348          | .            | . | .                  | . | . |
| .                  | .            | . | .                  | . | . |
| Vv18g0349          | .            | . | .                  | . | . |
| .                  | .            | . | .                  | . | . |
| Vv18g0350          | Tc08_g010270 | . | .                  | . | . |
| .                  | .            | . | .                  | . | . |
| Vv18g0351          | .            | . | .                  | . | . |
| .                  | .            | . | .                  | . | . |
| Vv18g0352          | .            | . | .                  | . | . |
| .                  | .            | . | .                  | . | . |
| Vv18g0353          | Tc08_g010260 | . | Gorai.005G090800.1 | . | . |
| Gorai.009G243700.1 | .            | . | .                  | . | . |

|                    |                    |   |   |   |                    |   |   |
|--------------------|--------------------|---|---|---|--------------------|---|---|
| .                  | .                  | . | . | . | .                  | . | . |
| .                  | .                  | . | . | . | .                  | . | . |
| Vv18g0354          | .                  | . | . | . | .                  | . | . |
| .                  | .                  | . | . | . | .                  | . | . |
| Vv18g0355          | .                  | . | . | . | .                  | . | . |
| .                  | .                  | . | . | . | .                  | . | . |
| Vv18g0356          | .                  | . | . | . | .                  | . | . |
| .                  | .                  | . | . | . | .                  | . | . |
| Vv18g0357          | Tc08_g010240       | . | . | . | Gorai.009G243600.1 | . | . |
| .                  | .                  | . | . | . | .                  | . | . |
| Vv18g0358          | .                  | . | . | . | .                  | . | . |
| .                  | .                  | . | . | . | .                  | . | . |
| Vv18g0359          | Tc08_g010230       | . | . | . | .                  | . | . |
| Gorai.010G048400.1 | .                  | . | . | . | .                  | . | . |
| .                  | .                  | . | . | . | .                  | . | . |
| Vv18g0360          | .                  | . | . | . | Gorai.009G243500.1 | . | . |
| Gorai.010G048300.1 | .                  | . | . | . | .                  | . | . |
| .                  | .                  | . | . | . | .                  | . | . |
| Vv18g0361          | Tc08_g010200       | . | . | . | .                  | . | . |
| Gorai.010G048200.1 | .                  | . | . | . | .                  | . | . |
| .                  | .                  | . | . | . | .                  | . | . |
| Vv18g0362          | Tc08_g010190       | . | . | . | Gorai.005G090900.1 | . | . |
| Gorai.009G243400.1 | .                  | . | . | . | .                  | . | . |
| .                  | .                  | . | . | . | .                  | . | . |
| Vv18g0363          | Tc08_g010180       | . | . | . | Gorai.005G091100.1 | . | . |
| Gorai.010G048100.1 | .                  | . | . | . | .                  | . | . |
| .                  | .                  | . | . | . | .                  | . | . |
| Vv18g0364          | Tc08_g010170       | . | . | . | Gorai.009G243300.1 | . | . |
| .                  | .                  | . | . | . | .                  | . | . |
| Vv18g0365          | .                  | . | . | . | .                  | . | . |
| .                  | .                  | . | . | . | .                  | . | . |
| Vv18g0366          | Tc08_g010160       | . | . | . | Gorai.009G243200.1 | . | . |
| Gorai.010G048000.1 | .                  | . | . | . | Vv02g0595          | . | . |
| Tc03_g025370       | Gorai.003G170100.1 | . | . | . | .                  | . | . |
| .                  | .                  | . | . | . | .                  | . | . |
| Vv18g0367          | Tc08_g010150       | . | . | . | .                  | . | . |
| .                  | .                  | . | . | . | .                  | . | . |
| Vv18g0368          | Tc08_g010090       | . | . | . | Gorai.009G243100.1 | . | . |
| Gorai.010G047900.1 | .                  | . | . | . | .                  | . | . |

|                    |                    |                    |
|--------------------|--------------------|--------------------|
| Vv18g0369          | Tc08_g010060       | Gorai.005G091200.1 |
|                    | Vv1rg0392          |                    |
| Vv18g0370          | Tc08_g010040       | Gorai.009G243000.1 |
| Vv18g0371          |                    |                    |
| Vv18g0372          | Tc08_g010030       | Gorai.005G091400.1 |
| Gorai.009G242900.1 | Gorai.009G283100.1 | Gorai.010G047800.1 |
| Vv02g0599          | Tc03_g025330       | Gorai.003G170200.1 |
| Vv18g0373          | Tc08_g010020       | Gorai.009G242800.1 |
|                    | Gorai.009G283000.1 |                    |
| Vv18g0374          | Tc08_g010010       |                    |
| Gorai.010G047700.1 |                    |                    |
| Vv18g0375          | Tc08_g010000       | Gorai.005G091500.1 |
|                    | Gorai.010G047600.1 |                    |
| Vv18g0376          |                    |                    |
| Vv18g0377          | Tc08_g009960       | Gorai.005G091600.1 |
| Vv18g0378          | Tc08_g009950       | Gorai.             |
| 009G282900.1       | Gorai.010G047400.1 |                    |
| Vv18g0379          | Tc08_g009940       | Gorai.009G242600.1 |
| Vv18g0380          |                    |                    |
| Vv18g0381          | Tc08_g009930       | Gorai.005G091900.1 |
| Gorai.009G282700.1 | Gorai.010G047200.1 |                    |
| Vv18g0382          | Tc08_g009890       | Gorai.005G092000.1 |
|                    | Gorai.010G047100.1 |                    |

|                    |                    |   |   |                    |
|--------------------|--------------------|---|---|--------------------|
| Vv18g0383          | Tc08_g009880       | . | . | .                  |
| Gorai.010G047000.1 | .                  | . | . | .                  |
| Vv18g0384          | Tc08_g009870       | . | . | Gorai.009G242400.1 |
| .                  | Gorai.010G046900.1 | . | . | .                  |
| .                  | .                  | . | . | .                  |
| Vv18g0385          | .                  | . | . | .                  |
| .                  | .                  | . | . | .                  |
| Vv18g0386          | Tc08_g009850       | . | . | Gorai.009G242200.1 |
| .                  | Gorai.010G046700.1 | . | . | .                  |
| .                  | .                  | . | . | .                  |
| Vv18g0387          | Tc08_g009840       | . | . | Gorai.009G242100.1 |
| .                  | Gorai.010G046600.1 | . | . | .                  |
| .                  | .                  | . | . | .                  |
| Vv18g0388          | Tc08_g009830       | . | . | Gorai.009G242000.1 |
| .                  | Gorai.010G046500.1 | . | . | .                  |
| .                  | .                  | . | . | .                  |
| Vv18g0389          | .                  | . | . | .                  |
| .                  | .                  | . | . | .                  |
| Vv18g0390          | Tc08_g009820       | . | . | Gorai.009G241900.1 |
| .                  | Gorai.010G046000.1 | . | . | .                  |
| .                  | .                  | . | . | .                  |
| Vv18g0391          | Tc08_g009810       | . | . | Gorai.009G241800.1 |
| .                  | .                  | . | . | .                  |
| .                  | .                  | . | . | .                  |
| Vv18g0392          | .                  | . | . | .                  |
| .                  | .                  | . | . | .                  |
| Vv18g0393          | .                  | . | . | .                  |
| .                  | .                  | . | . | .                  |
| Vv18g0394          | .                  | . | . | .                  |
| .                  | .                  | . | . | .                  |
| Vv18g0395          | .                  | . | . | .                  |
| .                  | .                  | . | . | .                  |
| Vv18g0396          | .                  | . | . | .                  |
| .                  | .                  | . | . | .                  |
| Vv18g0397          | Tc08_g009790       | . | . | Gorai.005G092100.1 |



|                    |                    |                    |                    |                    |           |   |
|--------------------|--------------------|--------------------|--------------------|--------------------|-----------|---|
| Gorai.009G241600.1 | .                  | .                  | .                  | .                  | .         | . |
| .                  | .                  | .                  | .                  | .                  | .         | . |
| Vv18g0398          | Tc08_g009780       | .                  | Gorai.005G092200.1 | .                  | .         | . |
| Gorai.009G241500.1 | .                  | Gorai.010G045900.1 | .                  | .                  | .         | . |
| .                  | .                  | .                  | .                  | .                  | .         | . |
| Vv18g0399          | Tc08_g009770       | .                  | .                  | .                  | .         | . |
| Gorai.010G045800.1 | .                  | .                  | .                  | .                  | .         | . |
| .                  | .                  | .                  | .                  | .                  | .         | . |
| Vv18g0400          | Tc08_g009760       | .                  | .                  | .                  | .         | . |
| .                  | .                  | .                  | .                  | .                  | .         | . |
| .                  | .                  | .                  | .                  | .                  | .         | . |
| Vv18g0401          | Tc08_g009750       | .                  | .                  | .                  | .         | . |
| Vv02g0628          | Tc03_g025050       | .                  | Gorai.003G171200.1 | .                  | .         | . |
| .                  | .                  | Vv1rg0375          | .                  | .                  | .         | . |
| .                  | .                  | .                  | .                  | .                  | .         | . |
| Vv18g0402          | Tc08_g009740       | .                  | Gorai.005G092400.1 | .                  | .         | . |
| .                  | Gorai.010G045700.1 | .                  | .                  | .                  | .         | . |
| .                  | .                  | .                  | .                  | .                  | .         | . |
| .                  | .                  | .                  | .                  | .                  | .         | . |
| Vv18g0403          | Tc08_g009730       | .                  | .                  | .                  | .         | . |
| Gorai.010G045600.1 | .                  | .                  | .                  | .                  | .         | . |
| .                  | Vv07g1202          | .                  | .                  | .                  | .         | . |
| .                  | .                  | .                  | .                  | .                  | .         | . |
| Vv18g0404          | .                  | .                  | .                  | .                  | Vv07g1201 | . |
| .                  | .                  | .                  | .                  | .                  | .         | . |
| Vv18g0405          | Tc08_g009710       | .                  | Gorai.005G092500.1 | .                  | .         | . |
| Gorai.009G282600.1 | .                  | .                  | .                  | .                  | .         | . |
| .                  | .                  | .                  | .                  | .                  | .         | . |
| .                  | .                  | .                  | .                  | .                  | .         | . |
| Vv18g0406          | Tc08_g009700       | .                  | .                  | Gorai.009G241300.1 | .         | . |
| .                  | .                  | .                  | .                  | .                  | .         | . |
| .                  | .                  | .                  | .                  | .                  | .         | . |
| Vv18g0407          | Tc08_g009690       | .                  | .                  | Gorai.009G241200.1 | .         | . |
| .                  | .                  | .                  | .                  | .                  | .         | . |
| .                  | .                  | .                  | .                  | .                  | .         | . |
| Vv18g0408          | Tc08_g009680       | .                  | .                  | Gorai.009G241100.1 | .         | . |
| .                  | .                  | .                  | .                  | .                  | .         | . |
| .                  | .                  | .                  | .                  | .                  | .         | . |
| Vv18g0409          | Tc08_g009660       | .                  | .                  | .                  | .         | . |
| Gorai.010G045400.1 | .                  | .                  | .                  | .                  | .         | . |
| .                  | .                  | .                  | .                  | .                  | .         | . |
| Vv18g0410          | Tc08_g009650       | .                  | .                  | Gorai.009G241000.1 | .         | . |
| .                  | .                  | .                  | .                  | .                  | .         | . |
| .                  | .                  | .                  | .                  | .                  | .         | . |
| Vv18g0411          | Tc08_g009620       | .                  | Gorai.005G092600.1 | .                  | .         | . |
| .                  | Gorai.010G045100.1 | .                  | .                  | .                  | .         | . |
| .                  | .                  | .                  | .                  | .                  | .         | . |

|                    |                    |   |                    |                    |
|--------------------|--------------------|---|--------------------|--------------------|
| Vv18g0412          | Tc08_g009610       | . | .                  | Gorai.009G240600.1 |
| .                  | Gorai.010G045000.1 | . | .                  | .                  |
| .                  | .                  | . | .                  | .                  |
| Vv18g0413          | .                  | . | .                  | Gorai.             |
| 010G044900.1       | .                  | . | .                  | .                  |
| Vv18g0414          | Tc08_g009590       | . | .                  | Gorai.009G240500.1 |
| Gorai.009G282400.1 | .                  | . | .                  | .                  |
| .                  | .                  | . | .                  | .                  |
| Vv18g0415          | .                  | . | Gorai.005G092700.1 | .                  |
| Gorai.010G044800.1 | .                  | . | .                  | .                  |
| .                  | .                  | . | .                  | .                  |
| Vv18g0416          | .                  | . | .                  | Vv07g1194          |
| .                  | .                  | . | .                  | .                  |
| .                  | Gorai.007G061800.1 | . | .                  | .                  |
| Vv18g0417          | .                  | . | .                  | Vv07g1193          |
| .                  | .                  | . | .                  | .                  |
| .                  | .                  | . | Gorai.003G045500.1 | .                  |
| Vv18g0418          | .                  | . | .                  | .                  |
| .                  | .                  | . | .                  | .                  |
| Vv18g0419          | Tc08_g009580       | . | .                  | .                  |
| .                  | .                  | . | .                  | .                  |
| Vv07g1188          | .                  | . | .                  | .                  |
| Vv18g0420          | Tc08_g009570       | . | .                  | Gorai.009G240400.1 |
| .                  | .                  | . | .                  | .                  |
| .                  | Vv07g1187          | . | .                  | .                  |
| Gorai.003G045300.1 | .                  | . | .                  | .                  |
| Vv18g0421          | Tc08_g009560       | . | Gorai.005G093000.1 | .                  |
| .                  | .                  | . | .                  | .                  |
| .                  | Vv07g1185          | . | .                  | .                  |
| .                  | .                  | . | .                  | .                  |
| Vv18g0422          | .                  | . | .                  | Vv07g1172          |
| .                  | .                  | . | .                  | .                  |
| .                  | .                  | . | .                  | .                  |
| Vv18g0423          | .                  | . | .                  | Vv07g1170          |
| .                  | .                  | . | .                  | .                  |
| .                  | .                  | . | .                  | .                  |
| Vv18g0424          | Tc08_g009520       | . | .                  | .                  |
| Gorai.010G044500.1 | .                  | . | .                  | .                  |
| .                  | .                  | . | .                  | .                  |
| Vv18g0425          | Tc08_g009510       | . | .                  | Gorai.009G240100.1 |
| .                  | .                  | . | .                  | .                  |
| .                  | Vv07g1168          | . | .                  | .                  |
| .                  | .                  | . | .                  | .                  |
| Vv18g0426          | Tc08_g009490       | . | .                  | Gorai.009G240000.1 |

|                    |                    |                    |                    |                    |   |
|--------------------|--------------------|--------------------|--------------------|--------------------|---|
| .                  | Gorai.010G044300.1 | .                  | .                  | .                  | . |
| .                  | .                  | .                  | .                  | .                  | . |
| .                  | .                  | .                  | .                  | .                  | . |
| Vv18g0427          | Tc08_g009470       | .                  | .                  | Gorai.009G239900.1 | . |
| .                  | Gorai.010G044200.1 | .                  | .                  | .                  | . |
| .                  | .                  | .                  | .                  | .                  | . |
| .                  | .                  | .                  | .                  | .                  | . |
| Vv18g0428          | Tc08_g009450       | .                  | .                  | Gorai.             | . |
| 009G282300.1       | .                  | .                  | .                  | .                  | . |
| .                  | Vv07g0162          | Tc01_g027840       | Gorai.007G137600.1 | .                  | . |
| .                  | .                  | Gorai.004G216500.1 | .                  | .                  | . |
| Vv18g0429          | .                  | .                  | .                  | .                  | . |
| .                  | .                  | .                  | .                  | Vv07g0123          | . |
| .                  | Tc01_g028230       | .                  | .                  | Gorai.004G077800.1 | . |
| .                  | .                  | .                  | .                  | .                  | . |
| Vv18g0430          | Tc08_g009430       | .                  | .                  | Gorai.009G239700.1 | . |
| .                  | Gorai.010G044000.1 | Vv02g0660          | .                  | .                  | . |
| Gorai.004G190400.1 | Gorai.003G179300.1 | .                  | .                  | .                  | . |
| Gorai.006G215200.1 | .                  | .                  | .                  | .                  | . |
| .                  | .                  | .                  | .                  | .                  | . |
| Vv18g0431          | Tc08_g009420       | .                  | .                  | Gorai.009G239600.1 | . |
| .                  | .                  | .                  | .                  | .                  | . |
| .                  | .                  | .                  | .                  | .                  | . |
| Vv18g0432          | .                  | Gorai.005G093100.1 | .                  | .                  | . |
| Gorai.009G282200.1 | .                  | .                  | .                  | .                  | . |
| .                  | .                  | .                  | .                  | .                  | . |
| .                  | .                  | .                  | .                  | .                  | . |
| Vv18g0433          | .                  | .                  | .                  | .                  | . |
| .                  | .                  | .                  | .                  | .                  | . |
| .                  | .                  | .                  | .                  | .                  | . |
| Vv18g0434          | .                  | .                  | .                  | .                  | . |
| .                  | .                  | .                  | .                  | .                  | . |
| .                  | .                  | .                  | .                  | .                  | . |
| Vv18g0435          | Tc08_g009400       | .                  | .                  | Gorai.009G239400.1 | . |
| .                  | Gorai.010G043600.1 | .                  | .                  | .                  | . |
| .                  | .                  | .                  | .                  | .                  | . |
| .                  | .                  | .                  | .                  | .                  | . |
| Vv18g0436          | Tc08_g009390       | .                  | .                  | Gorai.009G239300.1 | . |
| .                  | Gorai.010G043500.1 | .                  | .                  | .                  | . |
| .                  | .                  | .                  | .                  | .                  | . |
| .                  | .                  | .                  | .                  | .                  | . |
| Vv18g0437          | .                  | .                  | .                  | .                  | . |
| .                  | .                  | .                  | .                  | .                  | . |
| .                  | .                  | .                  | .                  | .                  | . |
| Vv18g0438          | Tc08_g009380       | .                  | .                  | Gorai.009G239200.1 | . |
| .                  | Gorai.009G282100.1 | Vv02g0681          | .                  | .                  | . |
| Gorai.004G189700.1 | Gorai.003G179500.1 | .                  | .                  | .                  | . |
| Gorai.006G215300.1 | .                  | .                  | .                  | .                  | . |
| .                  | .                  | .                  | .                  | .                  | . |
| Vv18g0439          | Tc08_g009370       | .                  | .                  | .                  | . |

|                    |                    |                    |   |                    |   |   |   |
|--------------------|--------------------|--------------------|---|--------------------|---|---|---|
| .                  | .                  | .                  | . | .                  | . | . | . |
| .                  | .                  | .                  | . | .                  | . | . | . |
| Vv18g0440          | Tc08_g009360       | .                  | . | Gorai.005G093200.1 | . | . | . |
| .                  | .                  | .                  | . | .                  | . | . | . |
| .                  | .                  | .                  | . | .                  | . | . | . |
| Vv18g0441          | Tc08_g009350       | .                  | . | Gorai.005G093300.1 | . | . | . |
| Gorai.009G239100.1 | Gorai.009G282000.1 | .                  | . | .                  | . | . | . |
| .                  | .                  | .                  | . | .                  | . | . | . |
| .                  | .                  | .                  | . | .                  | . | . | . |
| Vv18g0442          | .                  | .                  | . | .                  | . | . | . |
| .                  | .                  | .                  | . | .                  | . | . | . |
| .                  | .                  | .                  | . | .                  | . | . | . |
| Vv18g0443          | Tc08_g009320       | .                  | . | Gorai.009G238900.1 | . | . | . |
| .                  | Gorai.010G043300.1 | .                  | . | .                  | . | . | . |
| .                  | .                  | .                  | . | .                  | . | . | . |
| .                  | .                  | .                  | . | .                  | . | . | . |
| Vv18g0444          | Tc08_g009310       | .                  | . | Gorai.005G093500.1 | . | . | . |
| Gorai.009G238800.1 | .                  | Gorai.010G043200.1 | . | .                  | . | . | . |
| .                  | .                  | .                  | . | .                  | . | . | . |
| .                  | .                  | .                  | . | .                  | . | . | . |
| Vv18g0445          | Tc08_g009300       | .                  | . | Gorai.009G238700.1 | . | . | . |
| Gorai.009G281900.1 | .                  | .                  | . | .                  | . | . | . |
| .                  | .                  | .                  | . | .                  | . | . | . |
| .                  | .                  | .                  | . | .                  | . | . | . |
| Vv18g0446          | Tc08_g009290       | .                  | . | Gorai.009G238600.1 | . | . | . |
| .                  | Gorai.010G042600.1 | .                  | . | .                  | . | . | . |
| .                  | .                  | .                  | . | .                  | . | . | . |
| .                  | .                  | .                  | . | .                  | . | . | . |
| Vv18g0447          | Tc08_g009270       | .                  | . | .                  | . | . | . |
| Gorai.010G042500.1 | .                  | .                  | . | .                  | . | . | . |
| .                  | .                  | .                  | . | .                  | . | . | . |
| .                  | .                  | .                  | . | .                  | . | . | . |
| Vv18g0448          | Tc08_g009250       | .                  | . | Gorai.009G238400.1 | . | . | . |
| .                  | Gorai.010G042400.1 | .                  | . | .                  | . | . | . |
| .                  | .                  | .                  | . | .                  | . | . | . |
| .                  | .                  | .                  | . | .                  | . | . | . |
| Vv18g0449          | Tc08_g009240       | .                  | . | .                  | . | . | . |
| Gorai.010G042300.1 | .                  | .                  | . | .                  | . | . | . |
| .                  | .                  | .                  | . | .                  | . | . | . |
| .                  | .                  | .                  | . | .                  | . | . | . |
| Vv18g0450          | Tc08_g009230       | .                  | . | Gorai.009G238300.1 | . | . | . |
| Gorai.009G281800.1 | Gorai.010G042200.1 | .                  | . | .                  | . | . | . |
| .                  | .                  | .                  | . | .                  | . | . | . |
| .                  | .                  | .                  | . | .                  | . | . | . |
| Vv18g0451          | Tc08_g009220       | .                  | . | Gorai.009G238200.1 | . | . | . |
| .                  | .                  | .                  | . | .                  | . | . | . |
| .                  | .                  | .                  | . | .                  | . | . | . |
| Vv18g0452          | Tc08_g009210       | .                  | . | Gorai.             | . | . | . |
| 009G281700.1       | Vv02g0693          | Tc03_g022270       | . | .                  | . | . | . |
| .                  | Gorai.008G220500.1 | .                  | . | .                  | . | . | . |
| .                  | .                  | .                  | . | .                  | . | . | . |
| .                  | .                  | .                  | . | .                  | . | . | . |
| Vv18g0453          | .                  | .                  | . | .                  | . | . | . |

|                    |                    |                    |   |                    |   |   |
|--------------------|--------------------|--------------------|---|--------------------|---|---|
| .                  | .                  | .                  | . | .                  | . | . |
| .                  | .                  | .                  | . | .                  | . | . |
| Vv18g0454          | Tc08_g009200       | .                  | . | Gorai.009G238100.1 | . | . |
|                    | Gorai.009G281600.1 | Gorai.010G042000.1 | . | .                  | . | . |
| .                  | .                  | .                  | . | .                  | . | . |
| .                  | .                  | .                  | . | .                  | . | . |
| Vv18g0455          | Tc08_g009190       | .                  | . | Gorai.009G238000.1 | . | . |
| .                  | Gorai.010G041900.1 | .                  | . | .                  | . | . |
| .                  | .                  | .                  | . | .                  | . | . |
| .                  | .                  | .                  | . | .                  | . | . |
| Vv18g0456          | Tc08_g009180       | .                  | . | Gorai.009G237900.1 | . | . |
| .                  | .                  | .                  | . | .                  | . | . |
| .                  | .                  | .                  | . | .                  | . | . |
| Vv18g0457          | .                  | .                  | . | .                  | . | . |
| .                  | .                  | .                  | . | .                  | . | . |
| .                  | .                  | .                  | . | .                  | . | . |
| Vv18g0458          | Tc08_g009120       | .                  | . | Gorai.009G237600.1 | . | . |
| .                  | .                  | .                  | . | .                  | . | . |
| .                  | .                  | .                  | . | .                  | . | . |
| Vv18g0459          | Tc08_g009100       | .                  | . | Gorai.005G094000.1 | . | . |
| Gorai.009G237500.1 | .                  | .                  | . | .                  | . | . |
| .                  | .                  | .                  | . | .                  | . | . |
| .                  | .                  | .                  | . | .                  | . | . |
| Vv18g0460          | Tc08_g009090       | .                  | . | .                  | . | . |
| .                  | .                  | .                  | . | .                  | . | . |
| .                  | .                  | .                  | . | .                  | . | . |
| Vv18g0461          | Tc08_g009060       | .                  | . | Gorai.009G237200.1 | . | . |
| .                  | .                  | .                  | . | .                  | . | . |
| .                  | .                  | .                  | . | .                  | . | . |
| Vv18g0462          | Tc08_g009050       | .                  | . | Gorai.009G237100.1 | . | . |
| .                  | .                  | .                  | . | .                  | . | . |
| .                  | .                  | .                  | . | .                  | . | . |
| Vv18g0463          | Tc08_g009040       | .                  | . | Gorai.005G094100.1 | . | . |
| Gorai.009G237000.1 | .                  | Gorai.010G040300.1 | . | .                  | . | . |
| .                  | .                  | .                  | . | .                  | . | . |
| .                  | .                  | .                  | . | .                  | . | . |
| Vv18g0464          | Tc08_g009010       | .                  | . | Gorai.009G236900.1 | . | . |
|                    | Gorai.009G281000.1 | .                  | . | .                  | . | . |
| .                  | .                  | .                  | . | .                  | . | . |
| .                  | .                  | .                  | . | .                  | . | . |
| Vv18g0465          | Tc08_g009000       | .                  | . | Gorai.009G236700.1 | . | . |
|                    | Gorai.009G280900.1 | .                  | . | .                  | . | . |
| .                  | .                  | .                  | . | .                  | . | . |
| .                  | .                  | .                  | . | .                  | . | . |
| Vv18g0466          | Tc08_g008980       | .                  | . | Gorai.009G236500.1 | . | . |
| .                  | Gorai.010G040100.1 | Vv02g0733          | . | .                  | . | . |
| .                  | .                  | Vv07g0089          | . | .                  | . | . |
| Tc01_g028380       | .                  | Gorai.004G056100.1 | . | .                  | . | . |
| Vv18g0467          | Tc08_g008970       | .                  | . | Gorai.009G236400.1 | . | . |
| .                  | .                  | .                  | . | .                  | . | . |
| .                  | .                  | .                  | . | .                  | . | . |

|                    |                    |                    |        |                    |                    |   |   |
|--------------------|--------------------|--------------------|--------|--------------------|--------------------|---|---|
| Vv18g0468          | .                  | .                  | .      | .                  | .                  | . | . |
| .                  | .                  | .                  | .      | .                  | .                  | . | . |
| Vv18g0469          | Tc08_g008960       | .                  | .      | .                  | Gorai.009G236300.1 | . | . |
| .                  | Gorai.010G040000.1 | .                  | .      | .                  | .                  | . | . |
| .                  | .                  | .                  | .      | .                  | .                  | . | . |
| Vv18g0470          | Tc08_g008940       | .                  | .      | Gorai.005G094200.1 | .                  | . | . |
| .                  | Gorai.010G039900.1 | .                  | .      | .                  | .                  | . | . |
| .                  | .                  | .                  | .      | .                  | .                  | . | . |
| Vv18g0471          | .                  | .                  | .      | .                  | .                  | . | . |
| .                  | .                  | .                  | .      | .                  | .                  | . | . |
| Vv18g0472          | Tc08_g008930       | .                  | .      | .                  | .                  | . | . |
| .                  | .                  | .                  | .      | .                  | .                  | . | . |
| Vv18g0473          | Tc08_g008920       | .                  | .      | .                  | Gorai.009G236200.1 | . | . |
| .                  | .                  | .                  | .      | .                  | .                  | . | . |
| Vv18g0474          | .                  | .                  | .      | .                  | .                  | . | . |
| .                  | .                  | .                  | .      | .                  | .                  | . | . |
| Vv18g0475          | Tc08_g008900       | .                  | .      | .                  | Gorai.009G236100.1 | . | . |
| .                  | Gorai.009G280800.1 | Gorai.010G039800.1 | .      | .                  | .                  | . | . |
| .                  | .                  | .                  | .      | .                  | .                  | . | . |
| Vv18g0476          | .                  | .                  | .      | .                  | .                  | . | . |
| .                  | .                  | .                  | .      | .                  | .                  | . | . |
| Vv18g0477          | Tc08_g008870       | .                  | .      | .                  | .                  | . | . |
| Gorai.010G039600.1 | Vv07g0087          | Tc01_g028410       | Gorai. | .                  | .                  | . | . |
| 007G139800.1       | .                  | Gorai.004G076800.1 | .      | .                  | .                  | . | . |
| .                  | .                  | .                  | .      | .                  | .                  | . | . |
| Vv18g0478          | .                  | .                  | .      | .                  | .                  | . | . |
| .                  | .                  | .                  | .      | .                  | .                  | . | . |
| Vv18g0479          | .                  | .                  | .      | .                  | .                  | . | . |
| .                  | .                  | .                  | .      | .                  | .                  | . | . |
| Vv18g0480          | Tc08_g008850       | .                  | .      | .                  | Gorai.009G235700.1 | . | . |
| .                  | .                  | .                  | .      | .                  | .                  | . | . |
| Vv18g0481          | .                  | .                  | .      | .                  | .                  | . | . |
| .                  | .                  | .                  | .      | .                  | .                  | . | . |
| Vv18g0482          | .                  | .                  | .      | .                  | .                  | . | . |
| .                  | .                  | .                  | .      | .                  | .                  | . | . |
| .                  | .                  | .                  | .      | .                  | .                  | . | . |

|                    |              |   |   |                    |   |        |   |
|--------------------|--------------|---|---|--------------------|---|--------|---|
| Vv18g0483          | .            | . | . | .                  | . | .      | . |
| .                  | .            | . | . | .                  | . | .      | . |
| .                  | .            | . | . | .                  | . | .      | . |
| Vv18g0484          | Tc08_g008840 | . | . | Gorai.005G094300.1 | . | .      | . |
| Gorai.009G235600.1 | .            | . | . | .                  | . | .      | . |
| .                  | .            | . | . | .                  | . | .      | . |
| .                  | .            | . | . | .                  | . | .      | . |
| Vv18g0485          | Tc08_g008830 | . | . | .                  | . | .      | . |
| .                  | .            | . | . | .                  | . | .      | . |
| .                  | .            | . | . | .                  | . | .      | . |
| Vv18g0486          | .            | . | . | .                  | . | Gorai. | . |
| 010G039500.1       | .            | . | . | .                  | . | .      | . |
| .                  | .            | . | . | .                  | . | .      | . |
| Vv18g0487          | .            | . | . | .                  | . | .      | . |
| .                  | .            | . | . | .                  | . | .      | . |
| .                  | .            | . | . | .                  | . | .      | . |
| Vv18g0488          | .            | . | . | .                  | . | .      | . |
| .                  | .            | . | . | .                  | . | .      | . |
| .                  | .            | . | . | .                  | . | .      | . |
| Vv18g0489          | .            | . | . | .                  | . | .      | . |
| .                  | .            | . | . | .                  | . | .      | . |
| .                  | .            | . | . | .                  | . | .      | . |
| Vv18g0490          | .            | . | . | .                  | . | .      | . |
| .                  | .            | . | . | .                  | . | .      | . |
| .                  | .            | . | . | .                  | . | .      | . |
| Vv18g0491          | .            | . | . | .                  | . | .      | . |
| .                  | .            | . | . | .                  | . | .      | . |
| .                  | .            | . | . | .                  | . | .      | . |
| Vv18g0492          | .            | . | . | .                  | . | .      | . |
| .                  | .            | . | . | .                  | . | .      | . |
| .                  | .            | . | . | .                  | . | .      | . |
| Vv18g0493          | Tc08_g008820 | . | . | Gorai.005G094400.1 | . | .      | . |
| .                  | .            | . | . | .                  | . | .      | . |
| .                  | .            | . | . | .                  | . | .      | . |
| Vv18g0494          | .            | . | . | Gorai.009G235500.1 | . | .      | . |
| .                  | .            | . | . | .                  | . | .      | . |
| .                  | .            | . | . | .                  | . | .      | . |
| Vv18g0495          | .            | . | . | .                  | . | .      | . |
| .                  | .            | . | . | .                  | . | .      | . |
| .                  | .            | . | . | .                  | . | .      | . |
| Vv18g0496          | Tc08_g008810 | . | . | Gorai.009G235400.1 | . | .      | . |
| .                  | .            | . | . | .                  | . | .      | . |
| .                  | .            | . | . | .                  | . | .      | . |
| Vv18g0497          | .            | . | . | Gorai.009G235300.1 | . | .      | . |
| .                  | .            | . | . | .                  | . | .      | . |
| .                  | .            | . | . | .                  | . | .      | . |
| Vv18g0498          | .            | . | . | .                  | . | .      | . |
| .                  | .            | . | . | .                  | . | .      | . |
| .                  | .            | . | . | .                  | . | .      | . |
| Vv18g0499          | Tc08_g008800 | . | . | Gorai.009G235200.1 | . | .      | . |

|           |                                                 |   |                    |                    |
|-----------|-------------------------------------------------|---|--------------------|--------------------|
| Vv18g0500 | Tc08_g008790<br>Gorai.010G038800.1              | . | .                  | Gorai.009G235100.1 |
| Vv18g0501 | Tc08_g008780                                    | . | .                  | Gorai.009G235000.1 |
| Vv18g0502 | Tc08_g008770<br>Vv07g0086<br>Gorai.004G076600.1 | . | Tc01_g028430       | Gorai.009G234900.1 |
| Vv18g0503 |                                                 | . | .                  |                    |
| Vv18g0504 | Tc08_g008760<br>Gorai.010G038700.1              | . | .                  |                    |
| Vv18g0505 |                                                 | . | .                  |                    |
| Vv18g0506 | Tc08_g008750<br>Gorai.009G234800.1              | . | Gorai.005G094500.1 |                    |
| Vv18g0507 | Tc08_g008740                                    | . | .                  | Gorai.009G234700.1 |
| Vv18g0508 | Tc08_g008730<br>Gorai.009G280500.1              | . | Gorai.010G038600.1 | Gorai.009G234600.1 |
| Vv18g0509 |                                                 | . | .                  |                    |
| Vv18g0510 |                                                 | . | .                  |                    |
| Vv18g0511 | Tc08_g008710<br>Gorai.010G038400.1              | . | .                  |                    |
| Vv18g0512 | Tc08_g008660<br>Gorai.010G038200.1              | . | .                  |                    |
| Vv18g0513 | Tc08_g008650<br>009G280200.1                    | . | Gorai.             |                    |
| Vv18g0514 | Tc08_g008630                                    | . | .                  | Gorai.009G234000.1 |



|                    |                    |   |   |                    |   |
|--------------------|--------------------|---|---|--------------------|---|
| .                  | Gorai.010G037900.1 | . | . | .                  | . |
| .                  | .                  | . | . | .                  | . |
| .                  | .                  | . | . | .                  | . |
| Vv18g0515          | .                  | . | . | .                  | . |
| .                  | .                  | . | . | .                  | . |
| .                  | .                  | . | . | .                  | . |
| Vv18g0516          | Tc08_g008620       | . | . | Gorai.009G233900.1 | . |
| .                  | Gorai.010G037800.1 | . | . | .                  | . |
| .                  | .                  | . | . | .                  | . |
| .                  | .                  | . | . | .                  | . |
| Vv18g0517          | Tc08_g008610       | . | . | .                  | . |
| .                  | .                  | . | . | .                  | . |
| .                  | .                  | . | . | .                  | . |
| Vv18g0518          | .                  | . | . | .                  | . |
| .                  | .                  | . | . | .                  | . |
| .                  | .                  | . | . | .                  | . |
| Vv18g0519          | Tc08_g008600       | . | . | .                  | . |
| Gorai.010G037700.1 | .                  | . | . | .                  | . |
| .                  | .                  | . | . | .                  | . |
| Vv18g0520          | Tc08_g008590       | . | . | Gorai.009G233800.1 | . |
| .                  | Vv0Unrg4486        | . | . | .                  | . |
| .                  | .                  | . | . | .                  | . |
| .                  | .                  | . | . | .                  | . |
| Vv18g0521          | .                  | . | . | .                  | . |
| .                  | .                  | . | . | .                  | . |
| .                  | .                  | . | . | .                  | . |
| Vv18g0522          | .                  | . | . | .                  | . |
| .                  | .                  | . | . | .                  | . |
| .                  | .                  | . | . | .                  | . |
| Vv18g0523          | .                  | . | . | .                  | . |
| .                  | .                  | . | . | .                  | . |
| .                  | .                  | . | . | .                  | . |
| Vv18g0524          | .                  | . | . | .                  | . |
| .                  | .                  | . | . | .                  | . |
| .                  | .                  | . | . | .                  | . |
| Vv18g0525          | Tc08_g008550       | . | . | .                  | . |
| .                  | .                  | . | . | .                  | . |
| .                  | .                  | . | . | .                  | . |
| Vv18g0526          | Tc08_g008540       | . | . | Gorai.009G233400.1 | . |
| .                  | Gorai.010G037300.1 | . | . | .                  | . |
| .                  | .                  | . | . | .                  | . |
| .                  | .                  | . | . | .                  | . |
| Vv18g0527          | .                  | . | . | .                  | . |
| .                  | .                  | . | . | .                  | . |
| .                  | .                  | . | . | .                  | . |
| Vv18g0528          | .                  | . | . | .                  | . |
| .                  | .                  | . | . | .                  | . |
| .                  | .                  | . | . | .                  | . |
| Vv18g0529          | .                  | . | . | .                  | . |
| .                  | .                  | . | . | .                  | . |

|                    |              |   |                    |                    |   |
|--------------------|--------------|---|--------------------|--------------------|---|
| Vv18g0530          | Tc08_g008510 | . | .                  | Gorai.009G233100.1 | . |
| .                  | .            | . | .                  | .                  | . |
| Vv18g0531          | .            | . | Gorai.005G094800.1 | Gorai.             | . |
| 009G233000.1       | .            | . | Vv0Unrg4509        | .                  | . |
| .                  | .            | . | .                  | .                  | . |
| Vv18g0532          | .            | . | Gorai.005G095100.1 | .                  | . |
| .                  | .            | . | .                  | .                  | . |
| Vv18g0533          | .            | . | .                  | .                  | . |
| .                  | .            | . | .                  | .                  | . |
| Vv18g0534          | .            | . | Gorai.009G232900.1 | .                  | . |
| Gorai.010G037200.1 | .            | . | Vv0Unrg4515        | .                  | . |
| .                  | .            | . | .                  | .                  | . |
| Vv18g0535          | .            | . | .                  | .                  | . |
| .                  | .            | . | .                  | .                  | . |
| Vv18g0536          | .            | . | .                  | .                  | . |
| Vv0Unrg4516        | .            | . | .                  | .                  | . |
| .                  | .            | . | .                  | .                  | . |
| Vv18g0537          | .            | . | .                  | .                  | . |
| .                  | .            | . | .                  | .                  | . |
| Vv18g0538          | .            | . | .                  | .                  | . |
| .                  | .            | . | .                  | .                  | . |
| Vv18g0539          | .            | . | .                  | .                  | . |
| .                  | .            | . | .                  | .                  | . |
| Vv18g0540          | .            | . | .                  | .                  | . |
| .                  | .            | . | .                  | .                  | . |
| Vv18g0541          | .            | . | .                  | .                  | . |
| .                  | .            | . | .                  | .                  | . |
| Vv18g0542          | .            | . | Gorai.009G232600.1 | .                  | . |
| .                  | .            | . | .                  | .                  | . |
| Vv18g0543          | .            | . | Gorai.009G232500.1 | .                  | . |
| .                  | .            | . | .                  | .                  | . |
| Vv18g0544          | .            | . | Gorai.009G232400.1 | .                  | . |
| .                  | .            | . | .                  | .                  | . |
| Vv18g0545          | Tc08_g008120 | . | .                  | .                  | . |
| Gorai.010G036800.1 | .            | . | .                  | .                  | . |

|                    |                    |   |                    |                    |   |        |   |
|--------------------|--------------------|---|--------------------|--------------------|---|--------|---|
| Vv18g0546          | .                  | . | .                  | .                  | . | .      | . |
| .                  | .                  | . | .                  | .                  | . | .      | . |
| Vv18g0547          | .                  | . | .                  | Gorai.009G232300.1 | . | .      | . |
| .                  | .                  | . | .                  | .                  | . | .      | . |
| Vv18g0548          | .                  | . | .                  | Gorai.009G232200.1 | . | .      | . |
| .                  | .                  | . | .                  | .                  | . | .      | . |
| Vv18g0549          | Tc08_g000420       | . | .                  | .                  | . | .      | . |
| .                  | .                  | . | .                  | .                  | . | .      | . |
| Vv18g0550          | .                  | . | .                  | .                  | . | Gorai. | . |
| 010G036600.1       | Vv0Unrg4518        | . | .                  | .                  | . | .      | . |
| .                  | .                  | . | .                  | .                  | . | .      | . |
| Vv18g0551          | .                  | . | .                  | Gorai.009G279900.1 | . | .      | . |
| .                  | Vv0Unrg4520        | . | .                  | .                  | . | .      | . |
| .                  | .                  | . | .                  | .                  | . | .      | . |
| Vv18g0552          | .                  | . | .                  | Gorai.009G279800.1 | . | .      | . |
| .                  | .                  | . | .                  | .                  | . | .      | . |
| Vv18g0553          | .                  | . | .                  | Gorai.009G232000.1 | . | .      | . |
| Gorai.010G036400.1 | .                  | . | .                  | .                  | . | .      | . |
| .                  | .                  | . | .                  | .                  | . | .      | . |
| Vv18g0554          | .                  | . | .                  | .                  | . | .      | . |
| .                  | .                  | . | .                  | .                  | . | .      | . |
| Vv18g0555          | .                  | . | Gorai.005G095200.1 | Gorai.             | . | .      | . |
| 009G231900.1       | .                  | . | Vv0Unrg4521        | .                  | . | .      | . |
| .                  | .                  | . | .                  | .                  | . | .      | . |
| Vv18g0556          | Tc08_g002200       | . | .                  | Gorai.009G231800.1 | . | .      | . |
| .                  | Gorai.010G036300.1 | . | .                  | .                  | . | .      | . |
| .                  | .                  | . | .                  | .                  | . | .      | . |
| Vv18g0557          | .                  | . | .                  | .                  | . | .      | . |
| .                  | .                  | . | .                  | .                  | . | .      | . |
| Vv18g0558          | .                  | . | .                  | .                  | . | .      | . |
| .                  | .                  | . | .                  | .                  | . | .      | . |
| Vv18g0559          | .                  | . | .                  | .                  | . | .      | . |
| .                  | .                  | . | .                  | .                  | . | .      | . |
| Vv18g0560          | .                  | . | Gorai.005G095300.1 | Gorai.             | . | .      | . |
| 009G231700.1       | .                  | . | .                  | .                  | . | .      | . |
| .                  | .                  | . | .                  | .                  | . | .      | . |
| .                  | .                  | . | .                  | .                  | . | .      | . |

|                    |              |   |   |                    |                    |   |   |
|--------------------|--------------|---|---|--------------------|--------------------|---|---|
| Vv18g0561          | .            | . | . | .                  | .                  | . | . |
| .                  | .            | . | . | .                  | .                  | . | . |
| Vv18g0562          | .            | . | . | .                  | .                  | . | . |
| .                  | .            | . | . | .                  | .                  | . | . |
| Vv18g0563          | .            | . | . | .                  | Gorai.009G231600.1 | . | . |
| Gorai.010G036000.1 | .            | . | . | .                  | .                  | . | . |
| .                  | .            | . | . | .                  | .                  | . | . |
| Vv18g0564          | .            | . | . | .                  | .                  | . | . |
| .                  | .            | . | . | .                  | .                  | . | . |
| Vv18g0565          | Tc08_g007970 | . | . | .                  | Gorai.009G231300.1 | . | . |
| Gorai.010G035800.1 | .            | . | . | .                  | .                  | . | . |
| .                  | .            | . | . | .                  | .                  | . | . |
| Vv18g0566          | .            | . | . | .                  | Gorai.009G231100.1 | . | . |
| Gorai.010G035700.1 | .            | . | . | .                  | .                  | . | . |
| .                  | .            | . | . | .                  | .                  | . | . |
| Vv18g0567          | .            | . | . | Gorai.005G095400.1 | Gorai.             | . | . |
| 009G231000.1       | .            | . | . | .                  | .                  | . | . |
| .                  | .            | . | . | .                  | .                  | . | . |
| Vv18g0568          | .            | . | . | .                  | .                  | . | . |
| .                  | .            | . | . | .                  | .                  | . | . |
| Vv18g0569          | Tc08_g003700 | . | . | .                  | Gorai.005G095700.1 | . | . |
| .                  | .            | . | . | .                  | .                  | . | . |
| Vv18g0570          | .            | . | . | .                  | .                  | . | . |
| .                  | .            | . | . | .                  | .                  | . | . |
| Vv18g0571          | .            | . | . | .                  | .                  | . | . |
| .                  | .            | . | . | .                  | .                  | . | . |
| Vv18g0572          | Tc08_g001960 | . | . | .                  | Gorai.009G230800.1 | . | . |
| Gorai.010G035600.1 | .            | . | . | .                  | .                  | . | . |
| .                  | .            | . | . | .                  | .                  | . | . |
| Vv18g0573          | .            | . | . | .                  | Gorai.009G230700.1 | . | . |
| .                  | .            | . | . | .                  | .                  | . | . |
| Vv18g0574          | .            | . | . | .                  | Gorai.009G230600.1 | . | . |
| Gorai.009G279500.1 | .            | . | . | .                  | .                  | . | . |
| .                  | .            | . | . | .                  | .                  | . | . |
| Vv18g0575          | .            | . | . | Gorai.005G096000.1 | Gorai.             | . | . |
| 009G230500.1       | .            | . | . | .                  | .                  | . | . |

|                    |              |                    |                    |                    |  |  |
|--------------------|--------------|--------------------|--------------------|--------------------|--|--|
| Vv18g0576          |              |                    |                    |                    |  |  |
| Vv18g0577          |              |                    |                    |                    |  |  |
| Vv18g0578          |              |                    | Gorai.005G096300.1 |                    |  |  |
| Gorai.009G279400.1 |              |                    |                    |                    |  |  |
| Vv18g0579          |              |                    | Gorai.005G096500.1 | Gorai.             |  |  |
| 009G230400.1       |              |                    |                    |                    |  |  |
| Vv18g0580          |              |                    |                    | Gorai.             |  |  |
| 010G035500.1       | Vv05g0313    | Tc04_g001060       |                    |                    |  |  |
| Vv18g0581          |              |                    | Gorai.005G096600.1 |                    |  |  |
| Gorai.010G035400.1 |              |                    |                    |                    |  |  |
| Vv18g0582          |              |                    | Gorai.005G096700.1 | Gorai.             |  |  |
| 009G230300.1       |              | Gorai.010G035300.1 |                    |                    |  |  |
| Vv18g0583          |              |                    |                    |                    |  |  |
| Vv18g0584          |              |                    | Gorai.009G230100.1 |                    |  |  |
| Vv18g0585          | Tc08_g000200 |                    |                    | Gorai.009G230000.1 |  |  |
| Vv18g0586          |              |                    |                    |                    |  |  |
| Vv18g0587          |              |                    |                    |                    |  |  |
| Vv18g0588          |              |                    | Gorai.005G096800.1 | Gorai.             |  |  |
| 009G229800.1       |              | Gorai.010G035100.1 |                    |                    |  |  |
| Vv18g0589          |              |                    |                    | Gorai.             |  |  |
| 010G035000.1       | Vv05g0297    |                    |                    |                    |  |  |

|                    |              |   |   |   |   |                    |   |
|--------------------|--------------|---|---|---|---|--------------------|---|
| Vv18g0590          | .            | . | . | . | . | .                  | . |
| .                  | .            | . | . | . | . | .                  | . |
| Vv18g0591          | .            | . | . | . | . | .                  | . |
| .                  | .            | . | . | . | . | .                  | . |
| Vv18g0592          | .            | . | . | . | . | .                  | . |
| .                  | .            | . | . | . | . | .                  | . |
| Vv18g0593          | .            | . | . | . | . | Gorai.             | . |
| 010G034900.1       | .            | . | . | . | . | .                  | . |
| .                  | .            | . | . | . | . | .                  | . |
| Vv18g0594          | .            | . | . | . | . | .                  | . |
| Vv05g0261          | Tc04_g030360 | . | . | . | . | .                  | . |
| .                  | .            | . | . | . | . | .                  | . |
| Vv18g0595          | .            | . | . | . | . | Gorai.             | . |
| 010G034700.1       | .            | . | . | . | . | .                  | . |
| .                  | .            | . | . | . | . | .                  | . |
| Vv18g0596          | .            | . | . | . | . | .                  | . |
| .                  | .            | . | . | . | . | .                  | . |
| Vv18g0597          | .            | . | . | . | . | Gorai.             | . |
| 010G034600.1       | .            | . | . | . | . | .                  | . |
| .                  | .            | . | . | . | . | .                  | . |
| Vv18g0598          | .            | . | . | . | . | Gorai.009G279300.1 | . |
| Gorai.010G034500.1 | .            | . | . | . | . | .                  | . |
| .                  | .            | . | . | . | . | .                  | . |
| Vv18g0599          | .            | . | . | . | . | .                  | . |
| .                  | .            | . | . | . | . | .                  | . |
| Vv18g0600          | Tc08_g003720 | . | . | . | . | Gorai.009G229300.1 | . |
| .                  | .            | . | . | . | . | .                  | . |
| Vv18g0601          | .            | . | . | . | . | .                  | . |
| .                  | .            | . | . | . | . | .                  | . |
| Vv18g0602          | .            | . | . | . | . | .                  | . |
| .                  | .            | . | . | . | . | .                  | . |
| Vv18g0603          | .            | . | . | . | . | .                  | . |
| .                  | .            | . | . | . | . | .                  | . |
| Vv18g0604          | .            | . | . | . | . | .                  | . |
| .                  | .            | . | . | . | . | .                  | . |
| Vv18g0605          | .            | . | . | . | . | Gorai.009G229100.1 | . |
| Gorai.010G034400.1 | .            | . | . | . | . | .                  | . |
| .                  | .            | . | . | . | . | .                  | . |
| .                  | .            | . | . | . | . | .                  | . |

|                    |   |                    |   |                    |                    |        |   |
|--------------------|---|--------------------|---|--------------------|--------------------|--------|---|
| Vv18g0606          | . | .                  | . | .                  | .                  | Gorai. | . |
| 010G034200.1       | . | .                  | . | .                  | .                  | .      | . |
| .                  | . | .                  | . | .                  | .                  | .      | . |
| Vv18g0607          | . | .                  | . | .                  | .                  | .      | . |
| .                  | . | .                  | . | .                  | .                  | .      | . |
| Vv18g0608          | . | .                  | . | .                  | .                  | .      | . |
| .                  | . | .                  | . | .                  | .                  | .      | . |
| Vv18g0609          | . | .                  | . | Gorai.005G097000.1 | .                  | .      | . |
| Gorai.010G033800.1 | . | .                  | . | .                  | .                  | .      | . |
| .                  | . | .                  | . | .                  | .                  | .      | . |
| .                  | . | .                  | . | .                  | .                  | .      | . |
| Vv18g0610          | . | .                  | . | .                  | .                  | Gorai. | . |
| 010G033700.1       | . | .                  | . | .                  | .                  | .      | . |
| .                  | . | .                  | . | .                  | .                  | .      | . |
| Vv18g0611          | . | .                  | . | .                  | .                  | .      | . |
| .                  | . | .                  | . | .                  | .                  | .      | . |
| Vv18g0612          | . | .                  | . | .                  | .                  | .      | . |
| .                  | . | .                  | . | .                  | .                  | .      | . |
| Vv18g0613          | . | .                  | . | Gorai.005G097100.1 | .                  | .      | . |
| Gorai.009G279200.1 | . | Gorai.010G033400.1 | . | .                  | .                  | .      | . |
| .                  | . | .                  | . | .                  | .                  | .      | . |
| .                  | . | .                  | . | .                  | .                  | .      | . |
| Vv18g0614          | . | .                  | . | .                  | .                  | .      | . |
| .                  | . | .                  | . | .                  | .                  | .      | . |
| Vv18g0615          | . | .                  | . | .                  | .                  | .      | . |
| .                  | . | .                  | . | .                  | .                  | .      | . |
| Vv18g0616          | . | .                  | . | Gorai.009G228700.1 | .                  | .      | . |
| .                  | . | .                  | . | .                  | .                  | .      | . |
| .                  | . | .                  | . | .                  | .                  | .      | . |
| Vv18g0617          | . | .                  | . | .                  | Gorai.009G279000.1 | .      | . |
| .                  | . | .                  | . | .                  | .                  | .      | . |
| .                  | . | .                  | . | .                  | .                  | .      | . |
| Vv18g0618          | . | .                  | . | Gorai.009G228600.1 | .                  | .      | . |
| .                  | . | .                  | . | .                  | .                  | .      | . |
| .                  | . | .                  | . | .                  | .                  | .      | . |
| Vv18g0619          | . | .                  | . | Gorai.009G228500.1 | .                  | .      | . |
| .                  | . | .                  | . | .                  | .                  | .      | . |
| .                  | . | .                  | . | .                  | .                  | .      | . |
| Vv18g0620          | . | .                  | . | .                  | .                  | Gorai. | . |
| 010G033300.1       | . | .                  | . | .                  | .                  | .      | . |
| .                  | . | .                  | . | .                  | .                  | .      | . |
| Vv18g0621          | . | .                  | . | .                  | .                  | .      | . |
| .                  | . | .                  | . | .                  | .                  | .      | . |
| .                  | . | .                  | . | .                  | .                  | .      | . |

|                    |                    |   |   |                    |   |
|--------------------|--------------------|---|---|--------------------|---|
| Vv18g0622          | Tc08_g003800       | . | . | .                  | . |
| .                  | .                  | . | . | .                  | . |
| Vv18g0623          | .                  | . | . | Gorai.009G278900.1 | . |
| .                  | Vv05g0227          | . | . | Gorai.006G265700.1 | . |
| .                  | .                  | . | . | .                  | . |
| Vv18g0624          | .                  | . | . | Gorai.009G228200.1 | . |
| Gorai.010G033100.1 | .                  | . | . | .                  | . |
| .                  | .                  | . | . | .                  | . |
| Vv18g0625          | .                  | . | . | .                  | . |
| .                  | .                  | . | . | .                  | . |
| Vv18g0626          | .                  | . | . | Gorai.009G228000.1 | . |
| Gorai.009G278800.1 | .                  | . | . | .                  | . |
| .                  | .                  | . | . | .                  | . |
| Vv18g0627          | .                  | . | . | .                  | . |
| .                  | .                  | . | . | .                  | . |
| Vv18g0628          | .                  | . | . | Gorai.009G227800.1 | . |
| Gorai.010G033000.1 | .                  | . | . | .                  | . |
| .                  | .                  | . | . | .                  | . |
| Vv18g0629          | .                  | . | . | .                  | . |
| .                  | .                  | . | . | .                  | . |
| Vv18g0630          | .                  | . | . | .                  | . |
| .                  | .                  | . | . | .                  | . |
| Vv18g0631          | .                  | . | . | Gorai.009G227600.1 | . |
| Gorai.010G032800.1 | .                  | . | . | .                  | . |
| .                  | .                  | . | . | .                  | . |
| Vv18g0632          | Tc08_g002950       | . | . | .                  | . |
| Vv03g0892          | Tc02_g002320       | . | . | Gorai.005G263100.1 | . |
| .                  | Gorai.012G163200.1 | . | . | .                  | . |
| .                  | .                  | . | . | .                  | . |
| Vv18g0633          | .                  | . | . | .                  | . |
| .                  | .                  | . | . | .                  | . |
| Vv18g0634          | .                  | . | . | .                  | . |
| .                  | .                  | . | . | .                  | . |
| Vv18g0635          | .                  | . | . | Gorai.009G227200.1 | . |
| .                  | .                  | . | . | .                  | . |
| Vv18g0636          | .                  | . | . | Gorai.009G227100.1 | . |
| .                  | .                  | . | . | .                  | . |



|                    |              |   |   |   |                    |           |   |
|--------------------|--------------|---|---|---|--------------------|-----------|---|
| Vv18g0637          | .            | . | . | . | .                  | .         | . |
| .                  | .            | . | . | . | .                  | .         | . |
| Vv18g0638          | .            | . | . | . | Gorai.009G227000.1 | .         | . |
| .                  | .            | . | . | . | .                  | .         | . |
| Vv18g0639          | .            | . | . | . | Gorai.005G097200.1 | .         | . |
| .                  | .            | . | . | . | .                  | .         | . |
| Vv18g0640          | .            | . | . | . | .                  | .         | . |
| .                  | .            | . | . | . | .                  | .         | . |
| Vv18g0641          | Tc08_g004170 | . | . | . | .                  | .         | . |
| .                  | .            | . | . | . | .                  | .         | . |
| Vv18g0642          | .            | . | . | . | .                  | .         | . |
| .                  | .            | . | . | . | .                  | .         | . |
| Vv18g0643          | .            | . | . | . | Gorai.009G226800.1 | .         | . |
| Gorai.009G278600.1 | .            | . | . | . | .                  | .         | . |
| .                  | .            | . | . | . | .                  | .         | . |
| Vv18g0644          | .            | . | . | . | Gorai.009G226700.1 | .         | . |
| .                  | .            | . | . | . | .                  | .         | . |
| Vv18g0645          | .            | . | . | . | Gorai.009G226400.1 | .         | . |
| Gorai.010G031900.1 | .            | . | . | . | .                  | .         | . |
| .                  | .            | . | . | . | .                  | .         | . |
| Vv18g0646          | .            | . | . | . | .                  | .         | . |
| .                  | .            | . | . | . | .                  | .         | . |
| Vv18g0647          | .            | . | . | . | Gorai.009G226200.1 | .         | . |
| Gorai.010G031800.1 | .            | . | . | . | .                  | .         | . |
| .                  | .            | . | . | . | .                  | .         | . |
| Vv18g0648          | .            | . | . | . | .                  | .         | . |
| .                  | .            | . | . | . | .                  | .         | . |
| Vv18g0649          | .            | . | . | . | Gorai.009G226000.1 | .         | . |
| Gorai.010G031600.1 | .            | . | . | . | .                  | .         | . |
| .                  | .            | . | . | . | .                  | .         | . |
| Vv18g0650          | .            | . | . | . | .                  | .         | . |
| .                  | .            | . | . | . | .                  | .         | . |
| Tc01_g007370       | .            | . | . | . | .                  | Vv07g0889 | . |
| .                  | .            | . | . | . | Gorai.003G035600.1 | .         | . |
| Vv18g0651          | .            | . | . | . | .                  | .         | . |
| .                  | .            | . | . | . | .                  | .         | . |

|                    |              |           |                    |                    |   |
|--------------------|--------------|-----------|--------------------|--------------------|---|
| Vv18g0652          | .            | .         | .                  | Gorai.009G225900.1 | . |
| .                  | .            | .         | .                  | .                  | . |
| Vv18g0653          | .            | .         | .                  | Gorai.009G278400.1 | . |
| Gorai.010G031300.1 | .            | .         | .                  | .                  | . |
| .                  | .            | .         | .                  | .                  | . |
| Vv18g0654          | .            | .         | .                  | .                  | . |
| .                  | .            | .         | .                  | .                  | . |
| Vv18g0655          | .            | .         | .                  | Gorai.009G225700.1 | . |
| .                  | .            | .         | .                  | .                  | . |
| Vv18g0656          | .            | .         | Gorai.005G097300.1 | .                  | . |
| Gorai.010G031000.1 | .            | .         | .                  | .                  | . |
| .                  | .            | .         | .                  | .                  | . |
| Vv18g0657          | .            | .         | .                  | .                  | . |
| .                  | .            | .         | .                  | .                  | . |
| Vv18g0658          | Tc08_g014580 | .         | .                  | .                  | . |
| .                  | .            | .         | .                  | .                  | . |
| Vv18g0659          | .            | .         | .                  | .                  | . |
| .                  | .            | .         | .                  | .                  | . |
| Vv18g0660          | .            | .         | .                  | .                  | . |
| .                  | .            | .         | .                  | .                  | . |
| Vv18g0661          | .            | .         | .                  | .                  | . |
| .                  | .            | .         | .                  | .                  | . |
| Vv18g0662          | .            | .         | Gorai.009G225500.1 | .                  | . |
| Gorai.010G030700.1 | .            | .         | .                  | .                  | . |
| .                  | .            | .         | .                  | .                  | . |
| Vv18g0663          | .            | .         | .                  | .                  | . |
| .                  | .            | .         | .                  | .                  | . |
| Vv18g0664          | Tc08_g003050 | .         | .                  | .                  | . |
| .                  | .            | .         | .                  | .                  | . |
| Vv18g0665          | .            | .         | Gorai.005G097800.1 | Gorai.             | . |
| 009G224800.1       | .            | .         | .                  | .                  | . |
| .                  | .            | Vv07g0912 | Tc01_g007180       | .                  | . |
| Gorai.008G087400.1 | .            | .         | .                  | .                  | . |
| Vv18g0666          | .            | .         | Gorai.009G224700.1 | .                  | . |
| .                  | .            | .         | .                  | .                  | . |
| .                  | .            | .         | .                  | .                  | . |

|                    |                    |                    |                    |                    |                    |           |   |
|--------------------|--------------------|--------------------|--------------------|--------------------|--------------------|-----------|---|
| Vv18g0667          | .                  | .                  | .                  | .                  | .                  | .         | . |
| .                  | .                  | .                  | .                  | .                  | .                  | .         | . |
| Vv18g0668          | Tc08_g004570       | .                  | .                  | .                  | Gorai.009G224500.1 | .         | . |
|                    | Gorai.009G278100.1 | Gorai.010G029800.1 | .                  | .                  | .                  | .         | . |
| .                  | .                  | .                  | .                  | .                  | .                  | .         | . |
| Vv18g0669          | .                  | .                  | .                  | .                  | .                  | .         | . |
| .                  | .                  | .                  | .                  | .                  | .                  | .         | . |
| Vv18g0670          | .                  | .                  | .                  | .                  | .                  | Gorai.    | . |
| 010G029700.1       | .                  | .                  | .                  | .                  | .                  | .         | . |
| .                  | .                  | .                  | .                  | .                  | .                  | .         | . |
| Vv18g0671          | .                  | .                  | .                  | .                  | .                  | .         | . |
| .                  | .                  | .                  | .                  | .                  | .                  | .         | . |
| Vv18g0672          | .                  | .                  | .                  | .                  | .                  | .         | . |
| Vv03g0873          | .                  | .                  | .                  | .                  | Gorai.008G019300.1 | .         | . |
| .                  | .                  | .                  | .                  | .                  | .                  | .         | . |
| Vv18g0673          | .                  | .                  | .                  | .                  | Gorai.009G224300.1 | .         | . |
| Gorai.009G277900.1 | Gorai.010G029600.1 | .                  | .                  | .                  | .                  | .         | . |
| .                  | .                  | .                  | .                  | .                  | .                  | .         | . |
| Vv18g0674          | .                  | .                  | .                  | .                  | .                  | .         | . |
| .                  | .                  | .                  | .                  | .                  | .                  | .         | . |
| Vv18g0675          | .                  | .                  | .                  | .                  | Gorai.009G224000.1 | .         | . |
|                    | Gorai.010G029500.1 | .                  | .                  | .                  | .                  | .         | . |
| .                  | .                  | .                  | .                  | .                  | .                  | .         | . |
| Vv18g0676          | .                  | .                  | .                  | .                  | Gorai.009G223900.1 | .         | . |
|                    | Gorai.010G029400.1 | .                  | .                  | .                  | .                  | .         | . |
| .                  | .                  | .                  | .                  | .                  | .                  | .         | . |
| Vv18g0677          | .                  | .                  | .                  | .                  | .                  | .         | . |
| .                  | .                  | .                  | .                  | .                  | .                  | Vv07g0917 | . |
|                    | Tc01_g007120       | Gorai.007G057500.1 | Gorai.008G087000.1 | .                  | .                  | .         | . |
|                    | Gorai.007G228200.1 | Gorai.003G033800.1 | .                  | .                  | .                  | .         | . |
| Vv18g0678          | .                  | .                  | Gorai.005G098000.1 | Gorai.             | .                  | .         | . |
| 009G223700.1       | .                  | .                  | .                  | .                  | .                  | .         | . |
| .                  | .                  | .                  | .                  | .                  | .                  | .         | . |
| Vv18g0679          | .                  | .                  | .                  | Gorai.009G223500.1 | .                  | .         | . |
|                    | Gorai.010G029100.1 | .                  | .                  | .                  | .                  | .         | . |
| .                  | .                  | .                  | .                  | .                  | .                  | .         | . |
| Vv18g0680          | .                  | .                  | Gorai.005G098100.1 | Gorai.             | .                  | .         | . |
| 009G223200.1       | .                  | Gorai.010G029000.1 | .                  | .                  | .                  | .         | . |
| .                  | .                  | .                  | .                  | .                  | .                  | .         | . |
| .                  | .                  | .                  | .                  | .                  | .                  | .         | . |

|                    |                    |                    |                    |                    |                    |   |   |
|--------------------|--------------------|--------------------|--------------------|--------------------|--------------------|---|---|
| Vv18g0681          | .                  | .                  | .                  | .                  | .                  | . | . |
| .                  | .                  | .                  | .                  | .                  | .                  | . | . |
| Vv18g0682          | .                  | .                  | Gorai.005G098200.1 | .                  | Gorai.             | . | . |
| 009G223100.1       | .                  | .                  | .                  | .                  | .                  | . | . |
| .                  | .                  | .                  | .                  | .                  | .                  | . | . |
| Vv18g0683          | .                  | .                  | .                  | .                  | Gorai.009G277800.1 | . | . |
| .                  | .                  | .                  | .                  | .                  | .                  | . | . |
| Vv07g0924          | Tc01_g007050       | .                  | .                  | Gorai.008G086600.1 | .                  | . | . |
| Gorai.007G227600.1 | .                  | .                  | .                  | .                  | .                  | . | . |
| Vv18g0684          | .                  | .                  | .                  | .                  | .                  | . | . |
| .                  | .                  | .                  | .                  | .                  | .                  | . | . |
| Vv18g0685          | .                  | .                  | Gorai.005G098300.1 | .                  | Gorai.             | . | . |
| 009G223000.1       | .                  | Gorai.010G028900.1 | .                  | .                  | .                  | . | . |
| .                  | .                  | .                  | .                  | .                  | .                  | . | . |
| Vv18g0686          | .                  | .                  | .                  | .                  | .                  | . | . |
| .                  | .                  | .                  | .                  | .                  | .                  | . | . |
| Vv18g0687          | Tc08_g014670       | .                  | .                  | .                  | .                  | . | . |
| .                  | .                  | .                  | .                  | .                  | .                  | . | . |
| Vv18g0688          | .                  | .                  | .                  | .                  | .                  | . | . |
| .                  | .                  | .                  | .                  | .                  | .                  | . | . |
| Vv18g0689          | .                  | .                  | .                  | Gorai.009G222800.1 | .                  | . | . |
| Gorai.010G028700.1 | .                  | .                  | .                  | .                  | .                  | . | . |
| .                  | .                  | .                  | .                  | .                  | .                  | . | . |
| Vv18g0690          | .                  | .                  | .                  | .                  | .                  | . | . |
| .                  | .                  | .                  | .                  | .                  | .                  | . | . |
| Vv18g0691          | .                  | .                  | .                  | .                  | .                  | . | . |
| .                  | .                  | .                  | .                  | .                  | .                  | . | . |
| Vv18g0692          | .                  | .                  | .                  | Gorai.009G222700.1 | .                  | . | . |
| Gorai.009G277700.1 | .                  | .                  | .                  | .                  | .                  | . | . |
| .                  | .                  | .                  | .                  | .                  | .                  | . | . |
| Vv18g0693          | .                  | .                  | .                  | Gorai.009G222600.1 | .                  | . | . |
| .                  | .                  | .                  | .                  | .                  | .                  | . | . |
| Vv07g0926          | Tc01_g007010       | .                  | .                  | Gorai.             | .                  | . | . |
| 007G227300.1       | Gorai.003G032800.1 | .                  | .                  | .                  | .                  | . | . |
| Vv18g0694          | .                  | .                  | .                  | Gorai.009G222500.1 | .                  | . | . |
| Gorai.010G028600.1 | Vv03g0871          | .                  | .                  | .                  | .                  | . | . |
| .                  | .                  | .                  | .                  | .                  | .                  | . | . |
| Vv18g0695          | .                  | .                  | .                  | Gorai.009G222400.1 | .                  | . | . |

|                    |                    |           |                    |        |   |
|--------------------|--------------------|-----------|--------------------|--------|---|
|                    | Gorai.010G028500.1 | .         | .                  | .      | . |
|                    | .                  | Vv07g0933 | Tc01_g006960       | .      | . |
| Vv18g0696          | Gorai.007G226900.1 | .         | Gorai.003G032500.1 | .      | . |
| .                  | .                  | .         | Gorai.005G098400.1 | .      | . |
| .                  | .                  | .         | .                  | .      | . |
| Vv18g0697          | .                  | .         | Gorai.005G098500.1 | .      | . |
| .                  | Gorai.010G028400.1 | .         | .                  | .      | . |
| .                  | .                  | .         | .                  | .      | . |
| Vv18g0698          | .                  | .         | Gorai.005G098600.1 | Gorai. | . |
| 009G222300.1       | Gorai.009G277600.1 | .         | Gorai.010G028300.1 | .      | . |
| .                  | .                  | .         | .                  | .      | . |
| .                  | .                  | .         | .                  | .      | . |
| Vv18g0699          | Tc08_g015140       | .         | .                  | .      | . |
| Gorai.010G028200.1 | .                  | .         | .                  | .      | . |
| .                  | .                  | .         | .                  | .      | . |
| Vv18g0700          | .                  | .         | .                  | Gorai. | . |
| 010G028100.1       | .                  | .         | .                  | .      | . |
| .                  | .                  | .         | .                  | .      | . |
| Vv18g0701          | .                  | .         | .                  | .      | . |
| .                  | .                  | .         | .                  | .      | . |
| .                  | .                  | .         | .                  | .      | . |
| Vv18g0702          | .                  | .         | .                  | Gorai. | . |
| 010G028000.1       | .                  | .         | .                  | .      | . |
| .                  | .                  | .         | .                  | .      | . |
| Vv18g0703          | .                  | .         | .                  | Gorai. | . |
| 010G027900.1       | .                  | .         | .                  | .      | . |
| .                  | .                  | .         | .                  | .      | . |
| Vv18g0704          | .                  | .         | Gorai.005G098700.1 | Gorai. | . |
| 009G222200.1       | Gorai.009G277500.1 | .         | Gorai.010G027700.1 | .      | . |
| .                  | .                  | .         | .                  | .      | . |
| .                  | .                  | .         | .                  | .      | . |
| Vv18g0705          | .                  | .         | .                  | Gorai. | . |
| 010G027200.1       | .                  | .         | .                  | .      | . |
| .                  | .                  | .         | .                  | .      | . |
| Vv18g0706          | .                  | .         | .                  | .      | . |
| .                  | .                  | .         | .                  | .      | . |
| .                  | .                  | .         | .                  | .      | . |
| Vv18g0707          | .                  | .         | .                  | .      | . |
| .                  | .                  | .         | .                  | .      | . |
| .                  | .                  | .         | .                  | .      | . |
| Vv18g0708          | .                  | .         | .                  | .      | . |
| .                  | .                  | .         | .                  | .      | . |
| .                  | .                  | .         | .                  | .      | . |
| Vv18g0709          | .                  | .         | .                  | .      | . |
| .                  | .                  | .         | .                  | .      | . |
| .                  | .                  | .         | .                  | .      | . |
| Vv18g0710          | .                  | .         | Gorai.009G221700.1 | .      | . |
| .                  | Gorai.010G026900.1 | .         | .                  | .      | . |

|                    |   |                    |   |                    |                    |           |   |
|--------------------|---|--------------------|---|--------------------|--------------------|-----------|---|
| .                  | . | .                  | . | .                  | .                  | .         | . |
| .                  | . | .                  | . | .                  | .                  | .         | . |
| Vv18g0711          | . | .                  | . | .                  | .                  | .         | . |
| .                  | . | .                  | . | .                  | .                  | .         | . |
| .                  | . | .                  | . | .                  | .                  | .         | . |
| Vv18g0712          | . | .                  | . | .                  | .                  | .         | . |
| Vv03g0863          | . | .                  | . | .                  | .                  | .         | . |
| .                  | . | .                  | . | .                  | .                  | .         | . |
| Vv18g0713          | . | .                  | . | .                  | .                  | Gorai.    | . |
| 010G026600.1       | . | .                  | . | .                  | .                  | .         | . |
| Vv07g0939          |   | Tc01_g006800       | . | .                  | .                  | Gorai.    | . |
| 007G225900.1       | . | .                  | . | .                  | .                  | .         | . |
| Vv18g0714          | . | .                  | . | Gorai.009G221400.1 | .                  | .         | . |
| Gorai.010G026500.1 | . | .                  | . | .                  | .                  | .         | . |
| .                  | . | Vv07g0941          |   | Tc01_g006780       | .                  | .         | . |
| Gorai.007G225700.1 |   | Gorai.003G031700.1 | . | .                  | .                  | .         | . |
| Vv18g0715          | . | .                  | . | .                  | Gorai.009G277400.1 | .         | . |
| Gorai.010G026400.1 | . | .                  | . | .                  | .                  | .         | . |
| .                  | . | Vv07g0944          |   | Tc01_g006750       | .                  | .         | . |
| Gorai.008G084500.1 |   | Gorai.007G187800.1 | . | .                  | .                  | .         | . |
| Vv18g0716          | . | .                  | . | Gorai.009G221300.1 | .                  | .         | . |
| .                  | . | .                  | . | .                  | .                  | .         | . |
| .                  | . | .                  | . | .                  | .                  | .         | . |
| Vv18g0717          | . | .                  | . | .                  | .                  | .         | . |
| .                  | . | .                  | . | .                  | .                  | .         | . |
| .                  | . | .                  | . | .                  | .                  | .         | . |
| Vv18g0718          | . | .                  | . | .                  | .                  | .         | . |
| .                  | . | .                  | . | .                  | .                  | .         | . |
| .                  | . | .                  | . | .                  | .                  | .         | . |
| Vv18g0719          | . | .                  | . | .                  | .                  | .         | . |
| .                  | . | .                  | . | .                  | .                  | .         | . |
| .                  | . | .                  | . | .                  | .                  | .         | . |
| Vv18g0720          | . | .                  | . | Gorai.009G221100.1 | .                  | .         | . |
| .                  | . | .                  | . | .                  | .                  | .         | . |
| .                  | . | .                  | . | .                  | .                  | .         | . |
| Vv18g0721          | . | .                  | . | .                  | .                  | .         | . |
| Vv03g0827          | . | .                  | . | .                  | .                  | .         | . |
| .                  | . | .                  | . | .                  | .                  | .         | . |
| Vv18g0722          | . | .                  | . | Gorai.009G220900.1 | .                  | .         | . |
| .                  | . | .                  | . | .                  | .                  | .         | . |
| .                  | . | .                  | . | .                  | .                  | .         | . |
| Vv18g0723          | . | .                  | . | .                  | .                  | .         | . |
| .                  | . | .                  | . | .                  | .                  | .         | . |
| .                  | . | .                  | . | .                  | .                  | .         | . |
| Vv18g0724          | . | .                  | . | .                  | .                  | .         | . |
| .                  | . | .                  | . | .                  | .                  | .         | . |
| .                  | . | .                  | . | .                  | .                  | .         | . |
| Vv18g0725          | . | .                  | . | .                  | .                  | .         | . |
| .                  | . | .                  | . | .                  | .                  | Vv07g0949 | . |
| Tc01_g006690       |   | Gorai.007G056700.1 | . | .                  | .                  | Gorai.    | . |

|                    |                    |   |                    |                    |   |        |   |
|--------------------|--------------------|---|--------------------|--------------------|---|--------|---|
| 007G224700.1       | Gorai.003G031300.1 | . | .                  | .                  | . | .      | . |
| Vv18g0726          | .                  | . | .                  | .                  | . | .      | . |
| .                  | .                  | . | .                  | .                  | . | .      | . |
| Vv18g0727          | .                  | . | .                  | .                  | . | .      | . |
| Vv03g0814          | .                  | . | Gorai.005G230600.1 | .                  | . | .      | . |
| Gorai.008G019900.1 | .                  | . | .                  | .                  | . | .      | . |
| .                  | .                  | . | .                  | .                  | . | .      | . |
| Vv18g0728          | .                  | . | .                  | .                  | . | .      | . |
| .                  | .                  | . | .                  | .                  | . | .      | . |
| Vv18g0729          | .                  | . | .                  | .                  | . | .      | . |
| .                  | .                  | . | .                  | .                  | . | .      | . |
| Vv18g0730          | .                  | . | .                  | Gorai.009G220700.1 | . | .      | . |
| Gorai.010G026200.1 | .                  | . | .                  | .                  | . | .      | . |
| .                  | .                  | . | .                  | .                  | . | .      | . |
| Vv18g0731          | .                  | . | .                  | Gorai.009G220500.1 | . | .      | . |
| .                  | .                  | . | .                  | .                  | . | .      | . |
| Vv18g0732          | .                  | . | .                  | Gorai.009G220400.1 | . | .      | . |
| .                  | .                  | . | .                  | .                  | . | .      | . |
| Vv18g0733          | .                  | . | .                  | .                  | . | Gorai. | . |
| 010G026100.1       | Vv03g0810          | . | Tc02_g010330       | .                  | . | Gorai. | . |
| 005G230900.1       | .                  | . | Gorai.012G147400.1 | .                  | . | .      | . |
| .                  | .                  | . | .                  | .                  | . | .      | . |
| Vv18g0734          | .                  | . | .                  | .                  | . | Gorai. | . |
| 010G026000.1       | .                  | . | .                  | .                  | . | .      | . |
| .                  | .                  | . | .                  | .                  | . | .      | . |
| Vv18g0735          | .                  | . | .                  | Gorai.009G220300.1 | . | .      | . |
| .                  | .                  | . | .                  | .                  | . | .      | . |
| Vv18g0736          | .                  | . | .                  | .                  | . | .      | . |
| .                  | .                  | . | .                  | .                  | . | .      | . |
| Vv18g0737          | .                  | . | .                  | Gorai.005G099400.1 | . | Gorai. | . |
| 009G220100.1       | .                  | . | .                  | .                  | . | .      | . |
| .                  | .                  | . | .                  | .                  | . | .      | . |
| Vv18g0738          | .                  | . | .                  | Gorai.009G219900.1 | . | .      | . |
| .                  | .                  | . | .                  | .                  | . | .      | . |
| Vv18g0739          | .                  | . | .                  | Gorai.009G219800.1 | . | .      | . |
| Gorai.010G025800.1 | .                  | . | .                  | .                  | . | .      | . |
| .                  | .                  | . | .                  | .                  | . | .      | . |
| Vv18g0740          | .                  | . | .                  | Gorai.009G219600.1 | . | .      | . |
| Gorai.010G025700.1 | .                  | . | .                  | .                  | . | .      | . |

|              |                    |                    |                    |                    |        |        |   |
|--------------|--------------------|--------------------|--------------------|--------------------|--------|--------|---|
| .            | .                  | .                  | .                  | .                  | .      | .      | . |
| .            | .                  | .                  | .                  | .                  | .      | .      | . |
| Vv18g0741    | .                  | .                  | .                  | Gorai.009G219500.1 | .      | .      | . |
|              | Gorai.010G025600.1 | .                  | .                  | .                  | .      | .      | . |
| .            | .                  | .                  | .                  | .                  | .      | .      | . |
| .            | .                  | .                  | .                  | .                  | .      | .      | . |
| Vv18g0742    | .                  | .                  | .                  | .                  | .      | .      | . |
| .            | .                  | .                  | .                  | .                  | .      | .      | . |
| .            | .                  | .                  | .                  | .                  | .      | .      | . |
| Vv18g0743    | .                  | .                  | .                  | .                  | .      | Gorai. | . |
| 010G025500.1 | .                  | .                  | .                  | .                  | .      | .      | . |
| .            | .                  | .                  | .                  | .                  | .      | .      | . |
| Vv18g0744    | .                  | .                  | .                  | Gorai.009G219400.1 | .      | .      | . |
| .            | .                  | .                  | .                  | .                  | .      | .      | . |
|              | Vv07g0951          | Tc01_g006680       | .                  | .                  | Gorai. | .      | . |
| 007G224600.1 | Gorai.003G031200.1 | .                  | .                  | .                  | .      | .      | . |
| Vv18g0745    | .                  | .                  | Gorai.005G099600.1 | .                  | Gorai. | .      | . |
| 009G219300.1 | Gorai.009G277100.1 | .                  | .                  | Vv03g0790          | .      | .      | . |
| Tc02_g010210 | Gorai.013G050400.1 | .                  | .                  | .                  | .      | .      | . |
| .            | .                  | .                  | .                  | .                  | .      | .      | . |
| Vv18g0746    | .                  | .                  | .                  | .                  | .      | .      | . |
| .            | .                  | .                  | .                  | .                  | .      | .      | . |
| .            | .                  | .                  | .                  | .                  | .      | .      | . |
| Vv18g0747    | .                  | .                  | .                  | Gorai.009G219200.1 | .      | .      | . |
| .            | .                  | .                  | .                  | .                  | .      | .      | . |
| .            | .                  | .                  | .                  | .                  | .      | .      | . |
| Vv18g0748    | .                  | .                  | .                  | Gorai.009G219100.1 | .      | .      | . |
|              | Gorai.010G025400.1 | .                  | .                  | .                  | .      | .      | . |
| .            | .                  | .                  | .                  | .                  | .      | .      | . |
| .            | .                  | .                  | .                  | .                  | .      | .      | . |
| Vv18g0749    | .                  | .                  | .                  | Gorai.009G219000.1 | .      | .      | . |
|              | Gorai.010G025300.1 | .                  | .                  | .                  | .      | .      | . |
| .            | .                  | .                  | .                  | .                  | .      | .      | . |
| .            | .                  | .                  | .                  | .                  | .      | .      | . |
| Vv18g0750    | .                  | Gorai.002G132600.1 | .                  | Gorai.             | .      | .      | . |
| 009G218900.1 | .                  | Gorai.010G025200.1 | .                  | .                  | .      | .      | . |
| .            | .                  | .                  | .                  | .                  | .      | .      | . |
| .            | .                  | .                  | .                  | .                  | .      | .      | . |
| Vv18g0751    | .                  | .                  | .                  | Gorai.009G218800.1 | .      | .      | . |
|              | Gorai.010G025100.1 | Vv03g0778          | Tc02_g010100       | .                  | .      | .      | . |
|              | Gorai.005G232500.1 | .                  | Vv07g0982          | .                  | .      | .      | . |
|              | Tc01_g006300       | Gorai.007G056300.1 | Gorai.008G081100.1 | .                  | .      | .      | . |
|              | Gorai.007G222000.1 | .                  | .                  | .                  | .      | .      | . |
| Vv18g0752    | .                  | .                  | Gorai.005G099700.1 | .                  | Gorai. | .      | . |
| 009G218600.1 | .                  | Gorai.010G025000.1 | Vv03g0777          | .                  | .      | .      | . |
| Tc02_g010090 | Gorai.013G049900.1 | Gorai.005G232600.1 | .                  | .                  | .      | .      | . |
| .            | .                  | .                  | .                  | .                  | .      | .      | . |
| .            | .                  | .                  | .                  | .                  | .      | .      | . |
| Vv18g0753    | .                  | .                  | .                  | .                  | .      | .      | . |
| .            | .                  | .                  | .                  | .                  | .      | .      | . |



|                    |                    |                    |                    |                    |   |
|--------------------|--------------------|--------------------|--------------------|--------------------|---|
| Vv18g0754          | .                  | .                  | Gorai.005G099800.1 | .                  | . |
| .                  | .                  | .                  | .                  | .                  | . |
| Vv18g0755          | .                  | .                  | Gorai.009G218300.1 | .                  | . |
| .                  | Vv03g0771          | .                  | Tc02_g010000       | Gorai.013G049500.1 | . |
| .                  | .                  | .                  | .                  | .                  | . |
| Vv18g0756          | .                  | .                  | .                  | .                  | . |
| .                  | .                  | .                  | .                  | .                  | . |
| Vv18g0757          | .                  | Gorai.002G132700.1 | .                  | .                  | . |
| Gorai.009G277000.1 | .                  | .                  | .                  | .                  | . |
| .                  | .                  | .                  | .                  | .                  | . |
| Vv18g0758          | Tc08_g004170       | .                  | .                  | .                  | . |
| .                  | .                  | .                  | .                  | .                  | . |
| Vv18g0759          | .                  | .                  | Gorai.009G218200.1 | .                  | . |
| Gorai.009G274000.1 | .                  | Gorai.010G024800.1 | .                  | .                  | . |
| .                  | .                  | .                  | Vv07g0991          | .                  | . |
| Tc01_g006230       | .                  | Gorai.008G080400.1 | .                  | Gorai.             | . |
| 003G028800.1       | .                  | .                  | .                  | .                  | . |
| Vv18g0760          | .                  | .                  | .                  | Gorai.             | . |
| 010G024700.1       | .                  | .                  | .                  | .                  | . |
| .                  | Vv07g0992          | Tc01_g006220       | .                  | Gorai.008G080300.1 | . |
| .                  | Gorai.007G221500.1 | .                  | .                  | .                  | . |
| Vv18g0761          | Tc08_g004000       | .                  | .                  | .                  | . |
| .                  | .                  | .                  | .                  | .                  | . |
| Vv18g0762          | .                  | .                  | Gorai.009G217900.1 | .                  | . |
| .                  | .                  | .                  | .                  | .                  | . |
| Vv18g0763          | .                  | .                  | .                  | .                  | . |
| .                  | .                  | .                  | .                  | .                  | . |
| Vv18g0764          | .                  | .                  | Gorai.005G100000.1 | Gorai.             | . |
| 009G217800.1       | .                  | .                  | .                  | .                  | . |
| .                  | .                  | .                  | .                  | .                  | . |
| Vv18g0765          | .                  | .                  | .                  | .                  | . |
| Vv03g0759          | Tc02_g009910       | Gorai.013G049000.1 | Gorai.             | .                  | . |
| 005G233000.1       | .                  | .                  | Vv07g1000          | .                  | . |
| Tc01_g006140       | .                  | .                  | Gorai.007G190900.1 | .                  | . |
| Vv18g0766          | .                  | .                  | Gorai.005G100100.1 | Gorai.             | . |
| 009G217700.1       | .                  | .                  | .                  | .                  | . |
| .                  | .                  | .                  | .                  | .                  | . |
| Vv18g0767          | .                  | .                  | .                  | .                  | . |
| .                  | .                  | .                  | .                  | .                  | . |

|                    |                    |                    |                    |           |
|--------------------|--------------------|--------------------|--------------------|-----------|
| Vv18g0768          | .                  | .                  | Gorai.005G100200.1 | Gorai.    |
| 009G217600.1       | .                  | .                  | .                  | .         |
| .                  | .                  | .                  | .                  | .         |
| Vv18g0769          | .                  | .                  | .                  | .         |
| .                  | .                  | .                  | .                  | .         |
| Vv18g0770          | .                  | .                  | .                  | Gorai.    |
| 010G024500.1       | .                  | .                  | .                  | .         |
| Vv07g1003          | Tc01_g006100       | .                  | .                  | Gorai.    |
| 007G220600.1       | .                  | .                  | .                  | .         |
| Vv18g0771          | Gorai.002G132800.1 | .                  | .                  | .         |
| Gorai.010G024300.1 | .                  | .                  | .                  | .         |
| .                  | .                  | .                  | .                  | .         |
| Vv18g0772          | .                  | .                  | .                  | .         |
| .                  | .                  | .                  | .                  | .         |
| Vv18g0773          | Gorai.002G132900.1 | .                  | Gorai.             | .         |
| 009G217300.1       | .                  | .                  | .                  | .         |
| .                  | Vv07g1009          | Tc01_g006030       | Gorai.             | .         |
| 007G056000.1       | Gorai.007G191200.1 | Gorai.003G027900.1 | .                  | .         |
| .                  | .                  | .                  | .                  | .         |
| Vv18g0774          | Gorai.005G100300.1 | Gorai.             | .                  | .         |
| 009G217200.1       | .                  | .                  | .                  | .         |
| .                  | .                  | .                  | .                  | .         |
| Vv18g0775          | Gorai.009G217100.1 | .                  | .                  | .         |
| .                  | .                  | .                  | .                  | .         |
| Vv07g1011          | Tc01_g006010       | Gorai.008G079600.1 | .                  | .         |
| Gorai.007G219700.1 | Gorai.003G027800.1 | .                  | .                  | .         |
| Vv18g0776          | Tc08_g001370       | .                  | .                  | .         |
| .                  | .                  | .                  | .                  | .         |
| Vv18g0777          | Tc08_g001360       | .                  | .                  | .         |
| .                  | .                  | .                  | .                  | .         |
| Vv18g0778          | Tc08_g001340       | .                  | .                  | .         |
| .                  | .                  | .                  | .                  | .         |
| Vv18g0779          | Gorai.005G100500.1 | .                  | .                  | .         |
| .                  | .                  | .                  | .                  | .         |
| Vv07g1012          | Tc01_g006000       | .                  | .                  | .         |
| Gorai.003G027700.1 | .                  | .                  | .                  | .         |
| Vv18g0780          | .                  | .                  | .                  | .         |
| .                  | .                  | .                  | .                  | .         |
| Vv18g0781          | .                  | .                  | .                  | .         |
| .                  | .                  | .                  | .                  | Vv07g1013 |

|                    |                    |                    |                    |                    |   |
|--------------------|--------------------|--------------------|--------------------|--------------------|---|
|                    | Tc01_g005980       | .                  | .                  | Gorai.007G219600.1 | . |
| Vv18g0782          | .                  | .                  | Gorai.005G100600.1 | Gorai.             | . |
| 009G216900.1       | .                  | .                  | .                  | .                  | . |
| .                  | .                  | .                  | .                  | .                  | . |
| Vv18g0783          | .                  | .                  | .                  | .                  | . |
| .                  | .                  | .                  | .                  | .                  | . |
| Vv18g0784          | .                  | .                  | .                  | .                  | . |
| .                  | .                  | .                  | .                  | .                  | . |
| Vv18g0785          | .                  | .                  | .                  | .                  | . |
| .                  | .                  | .                  | .                  | .                  | . |
| Vv18g0786          | .                  | .                  | .                  | .                  | . |
| .                  | .                  | .                  | .                  | .                  | . |
| Vv18g0787          | .                  | .                  | .                  | .                  | . |
| .                  | .                  | .                  | .                  | .                  | . |
| Vv18g0788          | .                  | .                  | Gorai.009G216800.1 | .                  | . |
| Gorai.010G024100.1 | .                  | Vv03g0725          | Tc02_g009300       | .                  | . |
| Gorai.013G046400.1 | Gorai.005G235600.1 | .                  | .                  | .                  | . |
| Gorai.012G149300.1 | .                  | .                  | .                  | .                  | . |
| .                  | .                  | .                  | .                  | .                  | . |
| Vv18g0789          | .                  | Gorai.009G216700.1 | .                  | .                  | . |
| Gorai.010G024000.1 | .                  | .                  | .                  | .                  | . |
| .                  | .                  | .                  | .                  | .                  | . |
| Vv18g0790          | .                  | .                  | .                  | .                  | . |
| .                  | .                  | .                  | .                  | .                  | . |
| Vv18g0791          | .                  | .                  | .                  | .                  | . |
| .                  | .                  | .                  | .                  | .                  | . |
| Vv18g0792          | Tc08_g001300       | .                  | .                  | .                  | . |
| .                  | .                  | .                  | .                  | .                  | . |
| Vv18g0793          | .                  | .                  | .                  | .                  | . |
| .                  | .                  | .                  | .                  | .                  | . |
| Vv18g0794          | Tc08_g001290       | .                  | .                  | .                  | . |
| .                  | .                  | .                  | .                  | .                  | . |
| Vv18g0795          | .                  | .                  | .                  | .                  | . |
| .                  | .                  | .                  | .                  | .                  | . |
| Vv18g0796          | .                  | .                  | .                  | .                  | . |
| .                  | .                  | .                  | .                  | .                  | . |

|              |                    |   |   |   |                    |           |   |
|--------------|--------------------|---|---|---|--------------------|-----------|---|
| Vv18g0797    | .                  | . | . | . | .                  | .         | . |
|              | .                  | . | . | . | .                  | Vv07g1054 | . |
|              | Tc01_g005750       | . | . | . | .                  | .         | . |
| Vv18g0798    | .                  | . | . | . | .                  | .         | . |
|              | .                  | . | . | . | .                  | Vv07g1056 | . |
|              | Gorai.007G055700.1 | . | . | . | .                  | .         | . |
| Vv18g0799    | .                  | . | . | . | .                  | .         | . |
|              | .                  | . | . | . | .                  | .         | . |
| Vv18g0800    | .                  | . | . | . | .                  | .         | . |
|              | .                  | . | . | . | .                  | .         | . |
| Vv18g0801    | .                  | . | . | . | .                  | .         | . |
|              | .                  | . | . | . | .                  | .         | . |
| Vv18g0802    | .                  | . | . | . | .                  | .         | . |
|              | .                  | . | . | . | .                  | .         | . |
| Vv18g0803    | .                  | . | . | . | .                  | .         | . |
|              | .                  | . | . | . | .                  | .         | . |
| Vv18g0804    | .                  | . | . | . | .                  | .         | . |
|              | .                  | . | . | . | .                  | .         | . |
| Vv18g0805    | .                  | . | . | . | .                  | .         | . |
|              | .                  | . | . | . | .                  | .         | . |
| Vv18g0806    | .                  | . | . | . | .                  | .         | . |
|              | .                  | . | . | . | .                  | .         | . |
| Vv18g0807    | .                  | . | . | . | .                  | .         | . |
|              | .                  | . | . | . | .                  | .         | . |
| Vv18g0808    | .                  | . | . | . | .                  | .         | . |
|              | .                  | . | . | . | .                  | .         | . |
| Vv18g0809    | .                  | . | . | . | .                  | .         | . |
|              | .                  | . | . | . | .                  | .         | . |
| Vv18g0810    | Tc08_g001040       | . | . | . | .                  | Gorai.    | . |
| 009G275100.1 | .                  | . | . | . | .                  | .         | . |
|              | .                  | . | . | . | .                  | .         | . |
| Vv18g0811    | .                  | . | . | . | .                  | Gorai.    | . |
| 010G023400.1 | .                  | . | . | . | .                  | .         | . |
|              | .                  | . | . | . | .                  | .         | . |
| Vv18g0812    | .                  | . | . | . | Gorai.009G215800.1 | .         | . |
|              | Gorai.010G023300.1 | . | . | . | .                  | .         | . |
|              | .                  | . | . | . | .                  | .         | . |
|              | .                  | . | . | . | .                  | .         | . |

|                    |                    |                    |                    |                    |        |        |
|--------------------|--------------------|--------------------|--------------------|--------------------|--------|--------|
| Vv18g0813          | .                  | .                  | .                  | .                  | .      | Gorai. |
| 010G023200.1       | .                  | .                  | .                  | .                  | .      | .      |
| .                  | .                  | .                  | .                  | .                  | .      | .      |
| Vv18g0814          | .                  | .                  | .                  | .                  | .      | .      |
| .                  | .                  | .                  | .                  | .                  | .      | .      |
| Vv18g0815          | .                  | .                  | Gorai.005G101000.1 | .                  | Gorai. | .      |
| 009G215700.1       | .                  | Gorai.010G023000.1 | .                  | .                  | .      | .      |
| .                  | .                  | .                  | .                  | .                  | .      | .      |
| Vv18g0816          | .                  | Gorai.002G133500.1 | .                  | Gorai.005G101100.1 | .      | .      |
| Gorai.009G215600.1 | .                  | .                  | .                  | .                  | .      | .      |
| .                  | .                  | .                  | Vv07g1065          | .                  | .      | .      |
| Tc01_g005650       | .                  | .                  | Gorai.003G027100.1 | .                  | .      | .      |
| Gorai.011G106700.1 | .                  | .                  | .                  | .                  | .      | .      |
| Vv18g0817          | .                  | .                  | Gorai.005G101200.1 | .                  | Gorai. | .      |
| 009G215500.1       | .                  | .                  | .                  | .                  | .      | .      |
| .                  | .                  | .                  | .                  | .                  | .      | .      |
| Vv18g0818          | .                  | Gorai.002G133700.1 | .                  | Gorai.             | .      | .      |
| 009G215400.1       | .                  | Gorai.010G022900.1 | .                  | .                  | .      | .      |
| .                  | .                  | .                  | .                  | .                  | .      | .      |
| Vv18g0819          | .                  | .                  | Gorai.009G215300.1 | .                  | .      | .      |
| .                  | .                  | .                  | .                  | .                  | .      | .      |
| Vv18g0820          | .                  | .                  | Gorai.009G215200.1 | .                  | .      | .      |
| Gorai.010G022800.1 | .                  | Vv03g0724          | Tc02_g009280       | .                  | .      | .      |
| Gorai.013G046300.1 | .                  | Gorai.005G235700.1 | Gorai.002G008800.1 | .                  | .      | .      |
| .                  | .                  | .                  | .                  | .                  | .      | .      |
| Vv18g0821          | .                  | .                  | Gorai.009G215100.1 | .                  | .      | .      |
| .                  | .                  | .                  | .                  | .                  | .      | .      |
| Vv18g0822          | Tc08_g000020       | Gorai.002G133800.1 | .                  | .                  | .      | .      |
| Gorai.009G214900.1 | .                  | Gorai.010G022700.1 | Vv03g0722          | .                  | .      | .      |
| Tc02_g009260       | .                  | Gorai.005G235900.1 | .                  | .                  | .      | .      |
| .                  | Vv07g1072          | Tc01_g005600       | .                  | .                  | .      | .      |
| .                  | .                  | .                  | .                  | .                  | .      | .      |
| Vv18g0823          | .                  | .                  | .                  | .                  | .      | .      |
| .                  | .                  | .                  | .                  | .                  | .      | .      |
| Vv18g0824          | .                  | .                  | .                  | .                  | .      | .      |
| .                  | .                  | .                  | .                  | .                  | .      | .      |
| Vv18g0825          | Tc08_g000030       | .                  | Gorai.009G214800.1 | .                  | .      | .      |
| .                  | Gorai.010G022600.1 | Vv07g1076          | .                  | .                  | .      | .      |
| Tc01_g005580       | .                  | Gorai.007G216700.1 | Gorai.             | .                  | .      | .      |
| 003G026600.1       | .                  | .                  | .                  | .                  | .      | .      |
| .                  | .                  | .                  | .                  | .                  | .      | .      |

|                    |                    |                    |              |                    |                    |   |
|--------------------|--------------------|--------------------|--------------|--------------------|--------------------|---|
| Vv18g0826          | Tc08_g000050       | .                  | .            | .                  | .                  | . |
| .                  | .                  | .                  | .            | .                  | .                  | . |
| Vv18g0827          | Tc08_g000060       | .                  | .            | .                  | Gorai.009G214700.1 | . |
| .                  | .                  | .                  | .            | .                  | .                  | . |
| Vv18g0828          | Tc08_g000070       | .                  | .            | .                  | .                  | . |
| Gorai.010G022500.1 | .                  | .                  | .            | .                  | .                  | . |
| .                  | .                  | .                  | .            | .                  | .                  | . |
| Vv18g0829          | Tc08_g000080       | .                  | .            | .                  | Gorai.009G214600.1 | . |
| .                  | Gorai.010G022400.1 | .                  | Vv07g1081    | .                  | .                  | . |
| Tc01_g005510       | .                  | Gorai.007G216400.1 | .            | Gorai.             | .                  | . |
| 003G026200.1       | .                  | .                  | .            | .                  | .                  | . |
| .                  | .                  | .                  | .            | .                  | .                  | . |
| Vv18g0830          | .                  | .                  | .            | .                  | .                  | . |
| .                  | .                  | .                  | .            | .                  | .                  | . |
| .                  | .                  | .                  | .            | .                  | .                  | . |
| Vv18g0831          | Tc08_g000090       | .                  | .            | .                  | Gorai.009G214500.1 | . |
| .                  | Vv07g1082          | .                  | Tc01_g005500 | .                  | .                  | . |
| Gorai.007G216300.1 | .                  | .                  | .            | .                  | .                  | . |
| .                  | .                  | .                  | .            | .                  | .                  | . |
| Vv18g0832          | Tc08_g000100       | .                  | .            | .                  | .                  | . |
| Gorai.010G022300.1 | .                  | .                  | .            | .                  | .                  | . |
| .                  | .                  | .                  | .            | .                  | .                  | . |
| Vv18g0833          | Tc08_g000110       | .                  | .            | .                  | Gorai.009G214400.1 | . |
| .                  | Gorai.010G022200.1 | .                  | .            | .                  | .                  | . |
| .                  | .                  | .                  | .            | .                  | .                  | . |
| .                  | .                  | .                  | .            | .                  | .                  | . |
| Vv18g0834          | Tc08_g000130       | Gorai.002G134600.1 | .            | .                  | .                  | . |
| Gorai.009G214300.1 | .                  | Gorai.010G021900.1 | .            | .                  | .                  | . |
| .                  | .                  | .                  | .            | .                  | .                  | . |
| .                  | .                  | .                  | .            | .                  | .                  | . |
| Vv18g0835          | Tc08_g000140       | Gorai.002G134800.1 | .            | Gorai.             | .                  | . |
| 005G101400.1       | Gorai.009G214200.1 | .                  | .            | .                  | .                  | . |
| .                  | .                  | .                  | .            | .                  | .                  | . |
| .                  | .                  | .                  | .            | .                  | .                  | . |
| Vv18g0836          | Tc08_g000150       | .                  | .            | .                  | .                  | . |
| Gorai.010G021800.1 | .                  | .                  | .            | .                  | .                  | . |
| .                  | .                  | .                  | .            | .                  | .                  | . |
| .                  | .                  | .                  | .            | .                  | .                  | . |
| Vv18g0837          | Tc08_g000160       | .                  | .            | .                  | .                  | . |
| Gorai.010G021700.1 | Vv07g1097          | Tc01_g005380       | .            | .                  | .                  | . |
| Gorai.007G215600.1 | .                  | .                  | .            | .                  | .                  | . |
| .                  | .                  | .                  | .            | .                  | .                  | . |
| Vv18g0838          | .                  | Gorai.002G134900.1 | .            | Gorai.005G101600.1 | .                  | . |
| Gorai.009G214100.1 | .                  | .                  | .            | .                  | .                  | . |
| .                  | .                  | .                  | .            | .                  | .                  | . |
| .                  | .                  | .                  | .            | .                  | .                  | . |
| Vv18g0839          | .                  | .                  | .            | .                  | .                  | . |
| .                  | .                  | .                  | .            | .                  | .                  | . |
| .                  | .                  | .                  | .            | .                  | .                  | . |

|                    |              |                    |   |                    |
|--------------------|--------------|--------------------|---|--------------------|
| Vv18g0840          | Tc08_g000170 | .                  | . | .                  |
| Gorai.010G021400.1 | Vv07g1098    | Tc01_g005370       | . | .                  |
| Gorai.007G215500.1 | .            | .                  | . | .                  |
| .                  | .            | .                  | . | .                  |
| Vv18g0841          | .            | .                  | . | .                  |
| .                  | .            | .                  | . | .                  |
| .                  | .            | .                  | . | .                  |
| Vv18g0842          | .            | .                  | . | .                  |
| .                  | .            | .                  | . | .                  |
| .                  | .            | .                  | . | .                  |
| Vv18g0843          | .            | .                  | . | Gorai.             |
| 010G021300.1       | Vv07g1099    | .                  | . | Gorai.             |
| 007G215400.1       | .            | .                  | . | .                  |
| .                  | .            | .                  | . | .                  |
| Vv18g0844          | .            | .                  | . | Gorai.             |
| 010G021200.1       | Vv07g1101    | Tc01_g005330       | . | .                  |
| .                  | .            | .                  | . | .                  |
| .                  | .            | .                  | . | .                  |
| Vv18g0845          | Tc08_g000180 | .                  | . | Gorai.009G214000.1 |
| .                  | .            | .                  | . | .                  |
| .                  | .            | .                  | . | .                  |
| Vv18g0846          | Tc08_g000190 | .                  | . | Gorai.005G101700.1 |
| Gorai.009G213900.1 | .            | .                  | . | .                  |
| .                  | .            | .                  | . | .                  |
| .                  | .            | .                  | . | .                  |
| Vv18g0847          | Tc08_g000200 | .                  | . | Gorai.009G213800.1 |
| .                  | .            | .                  | . | .                  |
| .                  | .            | .                  | . | .                  |
| Vv18g0848          | .            | .                  | . | .                  |
| .                  | .            | .                  | . | .                  |
| .                  | .            | .                  | . | .                  |
| Vv18g0849          | Tc08_g000210 | Gorai.002G135000.1 | . | .                  |
| .                  | .            | .                  | . | .                  |
| .                  | .            | .                  | . | .                  |
| Vv18g0850          | Tc08_g000220 | .                  | . | Gorai.009G213700.1 |
| .                  | .            | .                  | . | .                  |
| .                  | .            | .                  | . | .                  |
| Vv18g0851          | Tc08_g000230 | .                  | . | Gorai.009G213600.1 |
| .                  | .            | .                  | . | .                  |
| .                  | .            | .                  | . | .                  |
| Vv18g0852          | Tc08_g000240 | .                  | . | .                  |
| Gorai.010G021100.1 | .            | .                  | . | .                  |
| .                  | .            | .                  | . | .                  |
| .                  | .            | .                  | . | .                  |
| Vv18g0853          | .            | .                  | . | .                  |
| .                  | .            | .                  | . | .                  |
| .                  | .            | .                  | . | .                  |
| Vv18g0854          | Tc08_g000250 | .                  | . | Gorai.009G213500.1 |
| .                  | .            | .                  | . | .                  |
| .                  | .            | .                  | . | .                  |
| Vv18g0855          | .            | .                  | . | .                  |

|                    |                    |                    |   |                    |                    |   |   |
|--------------------|--------------------|--------------------|---|--------------------|--------------------|---|---|
| .                  | .                  | .                  | . | .                  | .                  | . | . |
| .                  | .                  | .                  | . | .                  | .                  | . | . |
| Vv18g0856          | Tc08_g000260       | .                  | . | .                  | .                  | . | . |
| .                  | .                  | .                  | . | .                  | .                  | . | . |
| .                  | .                  | .                  | . | .                  | .                  | . | . |
| Vv18g0857          | Tc08_g000270       | .                  | . | .                  | Gorai.009G213400.1 | . | . |
| .                  | .                  | .                  | . | .                  | .                  | . | . |
| .                  | .                  | .                  | . | .                  | .                  | . | . |
| Vv18g0858          | .                  | .                  | . | Gorai.009G213300.1 | .                  | . | . |
| .                  | .                  | .                  | . | .                  | .                  | . | . |
| .                  | .                  | .                  | . | .                  | .                  | . | . |
| Vv18g0859          | Tc08_g000280       | .                  | . | Gorai.005G101900.1 | .                  | . | . |
| .                  | Gorai.010G020900.1 | .                  | . | Vv07g1120          | .                  | . | . |
| Tc01_g005200       | .                  | Gorai.008G077100.1 | . | Gorai.007G214000.1 | .                  | . | . |
| .                  | .                  | .                  | . | .                  | .                  | . | . |
| .                  | .                  | .                  | . | .                  | .                  | . | . |
| Vv18g0860          | Tc08_g000300       | .                  | . | Gorai.009G213200.1 | .                  | . | . |
| .                  | .                  | .                  | . | .                  | .                  | . | . |
| .                  | .                  | .                  | . | .                  | .                  | . | . |
| Vv18g0861          | Tc08_g000310       | Gorai.002G135200.1 | . | Gorai.             | .                  | . | . |
| 005G102000.1       | Gorai.009G213100.1 | .                  | . | Gorai.010G020700.1 | .                  | . | . |
| .                  | .                  | .                  | . | .                  | .                  | . | . |
| .                  | .                  | .                  | . | .                  | .                  | . | . |
| Vv18g0862          | Tc08_g000320       | .                  | . | .                  | .                  | . | . |
| Gorai.010G020600.1 | .                  | .                  | . | .                  | .                  | . | . |
| .                  | .                  | .                  | . | .                  | .                  | . | . |
| .                  | .                  | .                  | . | .                  | .                  | . | . |
| Vv18g0863          | Tc08_g000330       | .                  | . | Gorai.009G212900.1 | .                  | . | . |
| .                  | Gorai.010G020500.1 | .                  | . | .                  | .                  | . | . |
| .                  | .                  | .                  | . | .                  | .                  | . | . |
| .                  | .                  | .                  | . | .                  | .                  | . | . |
| Vv18g0864          | Tc08_g000340       | .                  | . | Gorai.005G102200.1 | .                  | . | . |
| .                  | Vv07g1127          | .                  | . | Tc01_g005120       | Gorai.             | . | . |
| 007G054400.1       | .                  | .                  | . | .                  | .                  | . | . |
| .                  | .                  | .                  | . | .                  | .                  | . | . |
| .                  | .                  | .                  | . | .                  | .                  | . | . |
| Vv18g0865          | Tc08_g000350       | .                  | . | Gorai.009G212800.1 | .                  | . | . |
| .                  | Gorai.010G020400.1 | .                  | . | Vv07g1130          | .                  | . | . |
| Tc01_g005070       | .                  | Gorai.008G076600.1 | . | .                  | .                  | . | . |
| .                  | .                  | .                  | . | .                  | .                  | . | . |
| .                  | .                  | .                  | . | .                  | .                  | . | . |
| Vv18g0866          | Tc08_g000360       | .                  | . | .                  | .                  | . | . |
| .                  | .                  | .                  | . | .                  | .                  | . | . |
| .                  | .                  | .                  | . | .                  | .                  | . | . |
| Vv18g0867          | .                  | .                  | . | .                  | Gorai.             | . | . |
| 010G020300.1       | .                  | .                  | . | .                  | .                  | . | . |
| .                  | .                  | .                  | . | .                  | .                  | . | . |
| .                  | .                  | .                  | . | .                  | .                  | . | . |
| Vv18g0868          | Tc08_g000380       | .                  | . | Gorai.009G212700.1 | .                  | . | . |
| .                  | .                  | .                  | . | .                  | .                  | . | . |
| .                  | .                  | .                  | . | .                  | .                  | . | . |
| Vv18g0869          | Tc08_g000390       | .                  | . | Gorai.005G102300.1 | .                  | . | . |
| Gorai.009G212600.1 | .                  | .                  | . | Vv03g0691          | .                  | . | . |
| Tc02_g008840       | Gorai.013G044500.1 | .                  | . | Gorai.005G237400.1 | .                  | . | . |



|                    |                    |                    |                    |                    |   |   |
|--------------------|--------------------|--------------------|--------------------|--------------------|---|---|
|                    | Gorai.008G024700.1 | .                  | .                  | .                  | . | . |
| Vv18g0870          | .                  | .                  | .                  | .                  | . | . |
| Vv18g0871          | .                  | .                  | .                  | .                  | . | . |
| Vv18g0872          | .                  | .                  | .                  | .                  | . | . |
| Vv18g0873          | Tc08_g000400       | .                  | Gorai.005G102400.1 | .                  | . | . |
|                    | Gorai.010G020200.1 | .                  | .                  | .                  | . | . |
|                    | .                  | Vv07g1135          | .                  | .                  | . | . |
| Vv18g0874          | Tc08_g000410       | .                  | .                  | Gorai.009G212500.1 | . | . |
| Vv18g0875          | Tc08_g000420       | .                  | .                  | Gorai.009G212400.1 | . | . |
|                    | Gorai.010G020100.1 | .                  | .                  | .                  | . | . |
| Vv18g0876          | Tc08_g000430       | Gorai.002G132500.1 | .                  | .                  | . | . |
| Gorai.009G212200.1 | .                  | Gorai.010G020000.1 | .                  | .                  | . | . |
| Vv18g0877          | Tc08_g000440       | .                  | .                  | Gorai.009G212100.1 | . | . |
|                    | Gorai.010G019900.1 | .                  | .                  | .                  | . | . |
| Vv18g0878          | .                  | .                  | .                  | .                  | . | . |
| Vv18g0879          | Tc08_g000450       | .                  | .                  | Gorai.009G211900.1 | . | . |
| Vv18g0880          | Tc08_g000460       | .                  | .                  | Gorai.009G211800.1 | . | . |
| Vv18g0881          | Tc08_g000470       | Gorai.002G132400.1 | .                  | .                  | . | . |
| Gorai.009G211700.1 | .                  | Gorai.010G019800.1 | .                  | .                  | . | . |
| Vv18g0882          | Tc08_g000510       | Gorai.002G132200.1 | .                  | .                  | . | . |
| Vv18g0883          | Tc08_g000520       | .                  | .                  | .                  | . | . |
| Gorai.010G019700.1 | Vv03g0675          | Tc02_g008750       | .                  | .                  | . | . |
| Gorai.005G238100.1 | Gorai.002G008100.1 | .                  | .                  | .                  | . | . |

|                    |                    |                    |                    |   |
|--------------------|--------------------|--------------------|--------------------|---|
| Vv18g0884          | Tc08_g000530       | Gorai.002G132100.1 | .                  | . |
| .                  | .                  | .                  | .                  | . |
| .                  | .                  | .                  | .                  | . |
| Vv18g0885          | Tc08_g000540       | Gorai.002G132000.1 | .                  | . |
| Gorai.009G211500.1 | .                  | Gorai.010G019600.1 | .                  | . |
| .                  | .                  | .                  | .                  | . |
| .                  | .                  | .                  | .                  | . |
| Vv18g0886          | Tc08_g000550       | .                  | Gorai.009G211400.1 | . |
| .                  | Gorai.010G019500.1 | .                  | .                  | . |
| .                  | .                  | .                  | .                  | . |
| .                  | .                  | .                  | .                  | . |
| Vv18g0887          | Tc08_g000560       | Gorai.002G131900.1 | .                  | . |
| .                  | .                  | .                  | .                  | . |
| .                  | .                  | .                  | .                  | . |
| Vv18g0888          | .                  | .                  | .                  | . |
| .                  | .                  | .                  | .                  | . |
| .                  | .                  | .                  | .                  | . |
| Vv18g0889          | .                  | .                  | .                  | . |
| .                  | .                  | .                  | .                  | . |
| .                  | .                  | .                  | .                  | . |
| Vv18g0890          | .                  | .                  | .                  | . |
| .                  | .                  | .                  | .                  | . |
| .                  | .                  | .                  | .                  | . |
| Vv18g0891          | .                  | .                  | .                  | . |
| .                  | .                  | .                  | .                  | . |
| .                  | .                  | .                  | .                  | . |
| Vv18g0892          | .                  | .                  | .                  | . |
| .                  | .                  | .                  | .                  | . |
| .                  | .                  | .                  | .                  | . |
| Vv18g0893          | .                  | .                  | .                  | . |
| .                  | .                  | .                  | .                  | . |
| .                  | .                  | .                  | .                  | . |
| Vv18g0894          | .                  | Gorai.005G103000.1 | .                  | . |
| .                  | .                  | .                  | .                  | . |
| .                  | .                  | .                  | .                  | . |
| Vv18g0895          | Tc08_g000690       | .                  | Gorai.009G211300.1 | . |
| .                  | Gorai.010G018400.1 | .                  | .                  | . |
| .                  | .                  | .                  | .                  | . |
| .                  | .                  | .                  | .                  | . |
| Vv18g0896          | Tc08_g000700       | Gorai.002G131700.1 | .                  | . |
| Gorai.009G211200.1 | .                  | Gorai.010G018300.1 | .                  | . |
| .                  | .                  | .                  | .                  | . |
| .                  | .                  | .                  | .                  | . |
| Vv18g0897          | Tc08_g000710       | .                  | Gorai.005G103200.1 | . |
| Gorai.009G211100.1 | .                  | Gorai.010G018200.1 | .                  | . |
| .                  | .                  | .                  | .                  | . |
| .                  | .                  | .                  | .                  | . |
| Vv18g0898          | Tc08_g000720       | Gorai.002G128700.1 | .                  | . |
| .                  | Vv03g0658          | .                  | Gorai.             | . |
| 005G238600.1       | Gorai.002G007600.1 | .                  | Vv07g1148          | . |

|                    |                    |   |   |                    |              |
|--------------------|--------------------|---|---|--------------------|--------------|
|                    | Tc01_g004850       | . | . | Gorai.007G212100.1 | .            |
| Vv18g0899          | Tc08_g000730       | . | . | Gorai.009G211000.1 | .            |
| .                  | .                  | . | . | .                  | .            |
| Vv18g0900          | Tc08_g000740       | . | . | Gorai.009G210900.1 | .            |
| .                  | Vv03g0656          | . | . | Gorai.             | .            |
| 005G238800.1       | Gorai.002G007500.1 | . | . | .                  | .            |
| Vv18g0901          | .                  | . | . | .                  | .            |
| .                  | .                  | . | . | .                  | .            |
| Vv18g0902          | Tc08_g000750       | . | . | .                  | .            |
| Gorai.010G018100.1 | .                  | . | . | .                  | .            |
| Vv18g0903          | Tc08_g000790       | . | . | .                  | .            |
| Gorai.010G017800.1 | .                  | . | . | .                  | .            |
| Vv18g0904          | .                  | . | . | .                  | .            |
| .                  | .                  | . | . | .                  | .            |
| Vv18g0905          | Tc08_g000810       | . | . | Gorai.005G103700.1 | .            |
| Gorai.009G210700.1 | .                  | . | . | Vv03g0649          | .            |
| Tc02_g008630       | Gorai.005G239100.1 | . | . | .                  | .            |
| Vv18g0906          | Tc08_g000820       | . | . | Gorai.005G103800.1 | .            |
| Gorai.009G210600.1 | .                  | . | . | Gorai.010G017700.1 | .            |
| .                  | .                  | . | . | .                  | .            |
| Vv18g0907          | .                  | . | . | .                  | .            |
| .                  | .                  | . | . | .                  | .            |
| Vv18g0908          | .                  | . | . | .                  | Gorai.       |
| 010G017600.1       | .                  | . | . | .                  | .            |
| Vv07g1153          | Tc01_g004810       | . | . | Gorai.007G051000.1 | .            |
| Gorai.007G211600.1 | .                  | . | . | Gorai.011G105000.1 | .            |
| Vv18g0909          | Tc08_g000830       | . | . | Gorai.005G103900.1 | .            |
| Gorai.009G210500.1 | .                  | . | . | .                  | .            |
| Gorai.007G053800.1 | .                  | . | . | Vv07g1156          | Tc01_g004780 |
| Gorai.011G102000.1 | .                  | . | . | Gorai.003G021700.1 | .            |
| Vv18g0910          | .                  | . | . | .                  | .            |
| .                  | .                  | . | . | .                  | .            |
| Vv18g0911          | .                  | . | . | .                  | .            |
| .                  | .                  | . | . | .                  | .            |
| Vv18g0912          | .                  | . | . | .                  | .            |
| .                  | .                  | . | . | .                  | .            |
| .                  | .                  | . | . | .                  | .            |

|              |              |   |                    |   |        |   |
|--------------|--------------|---|--------------------|---|--------|---|
| Vv18g0913    | Tc08_g000840 | . | .                  | . | .      | . |
| .            | .            | . | .                  | . | .      | . |
| Vv07g1158    | Tc01_g004630 | . | .                  | . | Gorai. | . |
| 003G018700.1 | .            | . | .                  | . | .      | . |
| Vv18g0914    | .            | . | Gorai.005G104200.1 | . | Gorai. | . |
| 009G210400.1 | .            | . | .                  | . | .      | . |
| .            | .            | . | .                  | . | .      | . |
| .            | .            | . | .                  | . | .      | . |
| Vv18g0915    | Tc08_g000850 | . | .                  | . | .      | . |
| .            | .            | . | .                  | . | .      | . |
| Vv07g1159    | Tc01_g004620 | . | .                  | . | .      | . |
| Vv18g0916    | .            | . | .                  | . | .      | . |
| .            | .            | . | .                  | . | .      | . |
| .            | .            | . | .                  | . | .      | . |
| Vv18g0917    | .            | . | Gorai.009G210300.1 | . | .      | . |
| .            | .            | . | .                  | . | .      | . |
| .            | .            | . | .                  | . | .      | . |
| Vv18g0918    | .            | . | .                  | . | .      | . |
| .            | .            | . | .                  | . | .      | . |
| .            | .            | . | .                  | . | .      | . |
| Vv18g0919    | .            | . | .                  | . | .      | . |
| .            | .            | . | .                  | . | .      | . |
| .            | .            | . | .                  | . | .      | . |
| Vv18g0920    | Tc08_g000860 | . | .                  | . | .      | . |
| .            | .            | . | .                  | . | .      | . |
| .            | .            | . | .                  | . | .      | . |
| Vv18g0921    | .            | . | Gorai.009G210000.1 | . | .      | . |
| .            | .            | . | .                  | . | .      | . |
| .            | .            | . | .                  | . | .      | . |
| Vv18g0922    | Tc08_g000870 | . | .                  | . | .      | . |
| .            | .            | . | .                  | . | .      | . |
| .            | .            | . | .                  | . | .      | . |
| Vv18g0923    | .            | . | .                  | . | .      | . |
| .            | .            | . | .                  | . | .      | . |
| .            | .            | . | .                  | . | .      | . |
| Vv18g0924    | Tc08_g000880 | . | .                  | . | .      | . |
| .            | .            | . | .                  | . | .      | . |
| .            | .            | . | .                  | . | .      | . |
| Vv18g0925    | .            | . | .                  | . | .      | . |
| .            | .            | . | .                  | . | .      | . |
| .            | .            | . | .                  | . | .      | . |
| Vv18g0926    | .            | . | .                  | . | .      | . |
| .            | .            | . | .                  | . | .      | . |
| .            | .            | . | .                  | . | .      | . |
| Vv18g0927    | .            | . | .                  | . | .      | . |
| .            | .            | . | .                  | . | .      | . |
| .            | .            | . | .                  | . | .      | . |
| Vv18g0928    | Tc08_g000890 | . | .                  | . | .      | . |
| .            | .            | . | .                  | . | .      | . |
| .            | .            | . | .                  | . | .      | . |

|                    |                    |                    |                    |                    |           |        |   |
|--------------------|--------------------|--------------------|--------------------|--------------------|-----------|--------|---|
| Vv18g0929          | .                  | .                  | .                  | .                  | .         | .      | . |
| .                  | .                  | .                  | .                  | .                  | .         | .      | . |
| Vv18g0930          | Tc08_g000900       | .                  | .                  | .                  | .         | .      | . |
| .                  | .                  | .                  | .                  | .                  | .         | .      | . |
| Vv18g0931          | Tc08_g000910       | .                  | .                  | .                  | .         | Gorai. | . |
| 009G275400.1       | .                  | .                  | .                  | .                  | .         | .      | . |
| Vv18g0932          | Tc08_g000920       | .                  | .                  | .                  | .         | .      | . |
| Vv03g0640          | Tc02_g008590       | Gorai.013G042400.1 | .                  | .                  | .         | .      | . |
| .                  | Gorai.008G025300.1 | Vv07g1160          | .                  | .                  | .         | .      | . |
| .                  | Gorai.007G210500.1 | .                  | .                  | .                  | .         | .      | . |
| Vv18g0933          | Tc08_g000930       | .                  | .                  | Gorai.009G209900.1 | .         | .      | . |
| .                  | Gorai.010G017500.1 | .                  | .                  | .                  | .         | .      | . |
| .                  | .                  | .                  | .                  | .                  | .         | .      | . |
| Vv18g0934          | Tc08_g000960       | .                  | .                  | Gorai.009G209600.1 | .         | .      | . |
| Gorai.009G275200.1 | Gorai.010G017300.1 | .                  | .                  | .                  | .         | .      | . |
| .                  | .                  | .                  | .                  | .                  | .         | .      | . |
| Vv18g0935          | .                  | .                  | .                  | .                  | .         | .      | . |
| .                  | .                  | .                  | .                  | .                  | .         | .      | . |
| Vv18g0936          | Tc08_g000970       | .                  | .                  | Gorai.009G209500.1 | .         | .      | . |
| .                  | .                  | .                  | .                  | .                  | .         | .      | . |
| Vv18g0937          | Tc08_g000990       | .                  | .                  | .                  | .         | .      | . |
| .                  | .                  | .                  | .                  | .                  | .         | .      | . |
| Vv18g0938          | Tc08_g001000       | .                  | .                  | Gorai.009G209300.1 | .         | .      | . |
| .                  | Gorai.010G017000.1 | .                  | .                  | .                  | .         | .      | . |
| .                  | .                  | .                  | .                  | .                  | .         | .      | . |
| Vv18g0939          | Tc08_g001010       | .                  | Gorai.005G104600.1 | .                  | .         | .      | . |
| Gorai.009G209200.1 | .                  | .                  | Vv03g0636          | .                  | .         | .      | . |
| Tc02_g008530       | Gorai.013G042200.1 | .                  | Gorai.002G007300.1 | .                  | .         | .      | . |
| Gorai.008G025600.1 | .                  | .                  | .                  | .                  | .         | .      | . |
| Vv18g0940          | .                  | .                  | .                  | .                  | .         | .      | . |
| Tc01_g031710       | .                  | Gorai.008G139300.1 | .                  | .                  | Vv07g0510 | .      | . |
| .                  | .                  | .                  | .                  | .                  | .         | .      | . |
| Vv18g0941          | Tc08_g001020       | .                  | .                  | .                  | .         | .      | . |
| Gorai.010G016900.1 | .                  | .                  | .                  | .                  | .         | .      | . |
| .                  | .                  | .                  | .                  | .                  | .         | .      | . |
| Vv18g0942          | Tc08_g001030       | .                  | Gorai.005G104800.1 | .                  | .         | .      | . |
| Gorai.009G209000.1 | .                  | .                  | .                  | .                  | .         | .      | . |
| .                  | .                  | .                  | .                  | .                  | .         | .      | . |
| .                  | .                  | .                  | .                  | .                  | .         | .      | . |

|                    |                    |                    |                    |                    |
|--------------------|--------------------|--------------------|--------------------|--------------------|
| Vv18g0943          | Tc08_g001040       | .                  | .                  | Gorai.009G208900.1 |
|                    | Gorai.009G275100.1 | Gorai.010G016800.1 | .                  | .                  |
| .                  | .                  | .                  | .                  | .                  |
| .                  | .                  | .                  | .                  | .                  |
| Vv18g0944          | Tc08_g001050       | .                  | .                  | .                  |
| Gorai.010G016700.1 | Vv03g0627          | Tc02_g008460       | Gorai.             | .                  |
| 013G041800.1       | .                  | .                  | .                  | .                  |
| .                  | .                  | .                  | .                  | .                  |
| Vv18g0945          | Tc08_g001060       | .                  | .                  | .                  |
| Gorai.010G016600.1 | .                  | .                  | .                  | .                  |
| .                  | .                  | .                  | .                  | .                  |
| Vv18g0946          | Tc08_g001080       | .                  | .                  | .                  |
| .                  | .                  | .                  | .                  | .                  |
| .                  | .                  | .                  | .                  | .                  |
| Vv18g0947          | .                  | .                  | .                  | .                  |
| .                  | .                  | .                  | .                  | .                  |
| .                  | .                  | .                  | .                  | .                  |
| Vv18g0948          | Tc08_g001100       | .                  | .                  | Gorai.009G208700.1 |
| .                  | .                  | .                  | .                  | .                  |
| .                  | .                  | .                  | .                  | .                  |
| Vv18g0949          | .                  | .                  | .                  | .                  |
| .                  | .                  | .                  | .                  | .                  |
| .                  | .                  | .                  | .                  | .                  |
| Vv18g0950          | Tc08_g001110       | .                  | .                  | Gorai.009G208600.1 |
| Gorai.009G275000.1 | .                  | .                  | .                  | .                  |
| .                  | .                  | .                  | .                  | .                  |
| .                  | .                  | .                  | .                  | .                  |
| Vv18g0951          | Tc08_g001120       | .                  | .                  | Gorai.009G208500.1 |
| .                  | Gorai.010G016200.1 | .                  | .                  | .                  |
| .                  | .                  | .                  | .                  | .                  |
| .                  | .                  | .                  | .                  | .                  |
| Vv18g0952          | Tc08_g001140       | .                  | .                  | Gorai.009G208400.1 |
| .                  | .                  | .                  | .                  | .                  |
| .                  | .                  | .                  | .                  | .                  |
| Vv18g0953          | Tc08_g001160       | .                  | .                  | Gorai.009G208200.1 |
| .                  | .                  | .                  | .                  | .                  |
| .                  | .                  | .                  | .                  | .                  |
| Vv18g0954          | Tc08_g001190       | .                  | .                  | Gorai.009G208000.1 |
| .                  | Gorai.010G016100.1 | .                  | .                  | .                  |
| .                  | .                  | .                  | .                  | .                  |
| .                  | .                  | .                  | .                  | .                  |
| Vv18g0955          | Tc08_g001200       | .                  | .                  | Gorai.009G207900.1 |
| .                  | Gorai.010G016000.1 | .                  | .                  | .                  |
| .                  | .                  | .                  | .                  | .                  |
| .                  | .                  | .                  | .                  | .                  |
| Vv18g0956          | Tc08_g001210       | .                  | Gorai.005G105200.1 | .                  |
| Gorai.009G207800.1 | .                  | Vv03g0587          | .                  | .                  |
| .                  | .                  | .                  | .                  | .                  |
| .                  | .                  | .                  | .                  | .                  |
| Vv18g0957          | Tc08_g001220       | .                  | .                  | Gorai.009G207500.1 |

|                    |                    |   |                    |   |   |
|--------------------|--------------------|---|--------------------|---|---|
| .                  | Gorai.010G015900.1 | . | .                  | . | . |
| .                  | .                  | . | .                  | . | . |
| .                  | .                  | . | .                  | . | . |
| Vv18g0958          | Tc08_g001230       | . | .                  | . | . |
| .                  | .                  | . | .                  | . | . |
| .                  | .                  | . | .                  | . | . |
| Vv18g0959          | Tc08_g001240       | . | .                  | . | . |
| Gorai.010G015800.1 | .                  | . | .                  | . | . |
| .                  | .                  | . | .                  | . | . |
| Vv18g0960          | .                  | . | .                  | . | . |
| .                  | .                  | . | .                  | . | . |
| .                  | .                  | . | .                  | . | . |
| Vv18g0961          | Tc08_g001250       | . | Gorai.005G105400.1 | . | . |
| Gorai.009G207400.1 | .                  | . | Vv03g0578          | . | . |
| Tc02_g008170       | .                  | . | .                  | . | . |
| .                  | .                  | . | .                  | . | . |
| Vv18g0962          | Tc08_g001260       | . | .                  | . | . |
| Gorai.010G015700.1 | Vv03g0574          | . | Gorai.002G214600.1 | . | . |
| Gorai.005G264100.1 | .                  | . | .                  | . | . |
| .                  | .                  | . | .                  | . | . |
| Vv18g0963          | Tc08_g001270       | . | Gorai.009G207300.1 | . | . |
| .                  | Gorai.010G015600.1 | . | .                  | . | . |
| .                  | .                  | . | .                  | . | . |
| .                  | .                  | . | .                  | . | . |
| Vv18g0964          | .                  | . | .                  | . | . |
| .                  | .                  | . | .                  | . | . |
| .                  | .                  | . | .                  | . | . |
| Vv18g0965          | Tc08_g001290       | . | .                  | . | . |
| Gorai.010G015400.1 | .                  | . | .                  | . | . |
| .                  | .                  | . | .                  | . | . |
| Vv18g0966          | Tc08_g001300       | . | .                  | . | . |
| .                  | .                  | . | .                  | . | . |
| .                  | .                  | . | .                  | . | . |
| Vv18g0967          | Tc08_g001310       | . | Gorai.009G207100.1 | . | . |
| .                  | Gorai.010G015200.1 | . | .                  | . | . |
| .                  | .                  | . | .                  | . | . |
| .                  | .                  | . | .                  | . | . |
| Vv18g0968          | Tc08_g001320       | . | .                  | . | . |
| Gorai.010G015000.1 | .                  | . | .                  | . | . |
| .                  | .                  | . | .                  | . | . |
| Vv18g0969          | Tc08_g001330       | . | Gorai.009G207000.1 | . | . |
| .                  | Gorai.010G014900.1 | . | .                  | . | . |
| .                  | .                  | . | .                  | . | . |
| .                  | .                  | . | .                  | . | . |
| Vv18g0970          | .                  | . | .                  | . | . |
| .                  | .                  | . | .                  | . | . |
| .                  | .                  | . | .                  | . | . |
| Vv18g0971          | .                  | . | .                  | . | . |
| .                  | .                  | . | .                  | . | . |
| .                  | .                  | . | .                  | . | . |

|                    |                    |   |   |                    |   |
|--------------------|--------------------|---|---|--------------------|---|
| Vv18g0972          | Tc08_g001340       | . | . | .                  | . |
| Gorai.010G014800.1 | .                  | . | . | .                  | . |
| .                  | .                  | . | . | .                  | . |
| Vv18g0973          | .                  | . | . | .                  | . |
| .                  | .                  | . | . | .                  | . |
| .                  | .                  | . | . | .                  | . |
| Vv18g0974          | Tc08_g001360       | . | . | .                  | . |
| Gorai.010G014600.1 | .                  | . | . | .                  | . |
| .                  | .                  | . | . | .                  | . |
| Vv18g0975          | Tc08_g001370       | . | . | Gorai.009G206700.1 | . |
| .                  | Gorai.010G014500.1 | . | . | .                  | . |
| .                  | .                  | . | . | .                  | . |
| .                  | .                  | . | . | .                  | . |
| Vv18g0976          | .                  | . | . | .                  | . |
| .                  | .                  | . | . | .                  | . |
| .                  | .                  | . | . | .                  | . |
| Vv18g0977          | Tc08_g001380       | . | . | .                  | . |
| Gorai.010G014400.1 | .                  | . | . | .                  | . |
| .                  | .                  | . | . | .                  | . |
| Vv18g0978          | Tc08_g001390       | . | . | Gorai.009G206600.1 | . |
| .                  | Gorai.010G014300.1 | . | . | .                  | . |
| .                  | .                  | . | . | .                  | . |
| .                  | .                  | . | . | .                  | . |
| Vv18g0979          | .                  | . | . | .                  | . |
| .                  | .                  | . | . | .                  | . |
| .                  | .                  | . | . | .                  | . |
| Vv18g0980          | Tc08_g001400       | . | . | .                  | . |
| Gorai.010G014200.1 | .                  | . | . | .                  | . |
| .                  | .                  | . | . | .                  | . |
| Vv18g0981          | Tc08_g001410       | . | . | Gorai.009G206500.1 | . |
| .                  | Gorai.009G274900.1 | . | . | .                  | . |
| .                  | .                  | . | . | .                  | . |
| .                  | .                  | . | . | .                  | . |
| Vv18g0982          | .                  | . | . | .                  | . |
| .                  | .                  | . | . | .                  | . |
| .                  | .                  | . | . | .                  | . |
| Vv18g0983          | Tc08_g001420       | . | . | .                  | . |
| Gorai.010G014100.1 | .                  | . | . | .                  | . |
| .                  | .                  | . | . | .                  | . |
| Vv18g0984          | Tc08_g001430       | . | . | Gorai.005G105700.1 | . |
| Gorai.009G206400.1 | Gorai.009G274800.1 | . | . | Gorai.010G014000.1 | . |
| .                  | .                  | . | . | .                  | . |
| .                  | .                  | . | . | .                  | . |
| Vv18g0985          | .                  | . | . | .                  | . |
| .                  | .                  | . | . | .                  | . |
| .                  | .                  | . | . | .                  | . |
| Vv18g0986          | Tc08_g001450       | . | . | Gorai.009G206300.1 | . |
| .                  | Gorai.010G013800.1 | . | . | .                  | . |
| .                  | .                  | . | . | .                  | . |
| .                  | .                  | . | . | .                  | . |



|                    |                    |                    |                    |   |
|--------------------|--------------------|--------------------|--------------------|---|
| Vv18g0987          | Tc08_g001460       | .                  | Gorai.005G105800.1 | . |
|                    | Gorai.009G274700.1 | Gorai.010G013600.1 | .                  | . |
| .                  | .                  | .                  | .                  | . |
| .                  | .                  | .                  | .                  | . |
| Vv18g0988          | .                  | .                  | .                  | . |
| .                  | .                  | .                  | .                  | . |
| .                  | .                  | .                  | .                  | . |
| Vv18g0989          | Tc08_g001470       | .                  | Gorai.009G206200.1 | . |
| .                  | Gorai.010G013500.1 | .                  | .                  | . |
| .                  | .                  | .                  | .                  | . |
| .                  | .                  | .                  | .                  | . |
| Vv18g0990          | .                  | .                  | .                  | . |
| .                  | .                  | .                  | .                  | . |
| .                  | .                  | .                  | .                  | . |
| Vv18g0991          | .                  | .                  | .                  | . |
| .                  | .                  | .                  | .                  | . |
| .                  | .                  | .                  | .                  | . |
| Vv18g0992          | .                  | .                  | .                  | . |
| .                  | .                  | .                  | .                  | . |
| .                  | .                  | .                  | .                  | . |
| Vv18g0993          | Tc08_g001490       | .                  | .                  | . |
| Gorai.010G013400.1 | .                  | .                  | .                  | . |
| .                  | .                  | .                  | .                  | . |
| .                  | .                  | .                  | .                  | . |
| Vv18g0994          | .                  | .                  | .                  | . |
| .                  | .                  | .                  | .                  | . |
| .                  | .                  | .                  | .                  | . |
| Vv18g0995          | Tc08_g001510       | .                  | Gorai.009G205900.1 | . |
|                    | Gorai.009G274500.1 | .                  | .                  | . |
| .                  | .                  | .                  | .                  | . |
| .                  | .                  | .                  | .                  | . |
| Vv18g0996          | .                  | .                  | .                  | . |
| .                  | .                  | .                  | .                  | . |
| .                  | .                  | .                  | .                  | . |
| Vv18g0997          | Tc08_g001530       | .                  | Gorai.009G205800.1 | . |
| .                  | Gorai.010G013300.1 | .                  | .                  | . |
| .                  | .                  | .                  | .                  | . |
| .                  | .                  | .                  | .                  | . |
| Vv18g0998          | Tc08_g001540       | .                  | .                  | . |
|                    | Vv03g0526          | Gorai.013G049300.1 | Gorai.             | . |
| 005G263200.1       | .                  | Gorai.012G163300.1 | .                  | . |
| .                  | .                  | .                  | .                  | . |
| .                  | .                  | .                  | .                  | . |
| Vv18g0999          | Tc08_g001550       | .                  | .                  | . |
| Gorai.010G013000.1 | .                  | .                  | .                  | . |
| .                  | .                  | .                  | .                  | . |
| .                  | .                  | .                  | .                  | . |
| Vv18g1000          | Tc08_g001560       | .                  | .                  | . |
| .                  | .                  | .                  | .                  | . |
| .                  | .                  | .                  | .                  | . |
| .                  | .                  | .                  | .                  | . |
| Vv18g1001          | Tc08_g001570       | .                  | Gorai.             | . |
| 009G274400.1       | .                  | .                  | .                  | . |
| .                  | .                  | .                  | .                  | . |
| .                  | .                  | .                  | .                  | . |

|                    |                    |                    |                    |                    |   |
|--------------------|--------------------|--------------------|--------------------|--------------------|---|
| Vv18g1002          | Tc08_g001580       | .                  | .                  | Gorai.009G205700.1 | . |
| .                  | Gorai.010G012900.1 | .                  | .                  | .                  | . |
| .                  | .                  | .                  | .                  | .                  | . |
| Vv18g1003          | .                  | .                  | .                  | .                  | . |
| .                  | .                  | .                  | .                  | .                  | . |
| .                  | .                  | .                  | .                  | .                  | . |
| Tc01_g003880       | .                  | Gorai.008G070800.1 | .                  | Vv04g1021          | . |
| 007G207200.1       | Gorai.003G018100.1 | .                  | .                  | Gorai.             | . |
| Vv18g1004          | .                  | .                  | .                  | .                  | . |
| .                  | .                  | .                  | .                  | .                  | . |
| .                  | .                  | .                  | .                  | .                  | . |
| Vv18g1005          | Tc08_g001590       | Gorai.002G129900.1 | .                  | .                  | . |
| Gorai.009G205600.1 | .                  | .                  | .                  | .                  | . |
| .                  | .                  | Vv04g1023          | .                  | .                  | . |
| Gorai.008G070600.1 | .                  | .                  | .                  | .                  | . |
| Vv18g1006          | Tc08_g001600       | .                  | .                  | Gorai.009G205500.1 | . |
| .                  | .                  | .                  | .                  | .                  | . |
| .                  | .                  | .                  | .                  | .                  | . |
| Vv18g1007          | Tc08_g001620       | .                  | .                  | Gorai.009G205400.1 | . |
| .                  | .                  | .                  | .                  | .                  | . |
| .                  | .                  | .                  | .                  | .                  | . |
| Vv18g1008          | Tc08_g001630       | Gorai.002G129800.1 | Gorai.             | .                  | . |
| 005G106100.1       | Gorai.009G205300.1 | Gorai.009G274300.1 | .                  | .                  | . |
| Gorai.010G012700.1 | .                  | .                  | .                  | .                  | . |
| .                  | Vv04g1035          | Tc01_g003810       | Gorai.             | .                  | . |
| 008G070000.1       | Gorai.007G207000.1 | Gorai.003G017900.1 | .                  | .                  | . |
| Vv18g1009          | .                  | .                  | .                  | .                  | . |
| .                  | .                  | .                  | .                  | .                  | . |
| .                  | .                  | .                  | .                  | .                  | . |
| Vv18g1010          | .                  | .                  | .                  | .                  | . |
| .                  | .                  | .                  | .                  | .                  | . |
| .                  | .                  | .                  | .                  | .                  | . |
| Vv18g1011          | .                  | .                  | .                  | .                  | . |
| .                  | .                  | .                  | .                  | .                  | . |
| .                  | .                  | .                  | .                  | .                  | . |
| Vv18g1012          | .                  | .                  | .                  | .                  | . |
| .                  | .                  | .                  | .                  | .                  | . |
| .                  | .                  | .                  | .                  | .                  | . |
| Vv18g1013          | Tc08_g001640       | Gorai.002G129700.1 | .                  | .                  | . |
| .                  | Gorai.010G012500.1 | .                  | .                  | .                  | . |
| .                  | .                  | .                  | .                  | .                  | . |
| .                  | .                  | .                  | .                  | .                  | . |
| Vv18g1014          | Tc08_g001650       | Gorai.005G106300.1 | .                  | .                  | . |
| .                  | Gorai.010G012400.1 | .                  | .                  | .                  | . |
| .                  | .                  | Vv04g1037          | Tc01_g003790       | .                  | . |
| .                  | Gorai.007G206900.1 | Gorai.003G017700.1 | .                  | .                  | . |
| Vv18g1015          | Tc08_g001660       | .                  | .                  | .                  | . |
| Gorai.010G012300.1 | Vv03g0519          | .                  | Gorai.013G052400.1 | .                  | . |
| .                  | .                  | .                  | .                  | .                  | . |
| .                  | .                  | .                  | .                  | .                  | . |

|                    |                    |                    |   |                    |   |           |   |
|--------------------|--------------------|--------------------|---|--------------------|---|-----------|---|
| Vv18g1016          | .                  | .                  | . | .                  | . | .         | . |
| .                  | .                  | .                  | . | .                  | . | .         | . |
| Vv18g1017          | Tc08_g001670       | .                  | . | Gorai.005G106400.1 | . | .         | . |
| Gorai.009G205200.1 | Gorai.009G274200.1 | .                  | . | .                  | . | .         | . |
| .                  | .                  | .                  | . | .                  | . | .         | . |
| Vv18g1018          | Tc08_g001680       | .                  | . | Gorai.009G205100.1 | . | .         | . |
| Gorai.009G274100.1 | Gorai.010G012200.1 | .                  | . | .                  | . | .         | . |
| .                  | .                  | .                  | . | .                  | . | .         | . |
| Vv18g1019          | Tc08_g001690       | .                  | . | Gorai.009G205000.1 | . | .         | . |
| .                  | .                  | .                  | . | .                  | . | .         | . |
| .                  | Vv04g1038          | Tc01_g003770       | . | .                  | . | .         | . |
| Gorai.007G206800.1 | Gorai.003G017600.1 | Gorai.011G103100.1 | . | .                  | . | .         | . |
| Vv18g1020          | Tc08_g001700       | .                  | . | Gorai.005G106500.1 | . | .         | . |
| Gorai.009G204900.1 | .                  | Gorai.010G012100.1 | . | .                  | . | .         | . |
| .                  | .                  | .                  | . | Vv04g1040          | . | .         | . |
| .                  | .                  | .                  | . | .                  | . | .         | . |
| Vv18g1021          | Tc08_g001710       | .                  | . | Gorai.009G204700.1 | . | .         | . |
| .                  | Gorai.010G012000.1 | .                  | . | .                  | . | .         | . |
| .                  | .                  | .                  | . | .                  | . | .         | . |
| Vv18g1022          | .                  | .                  | . | .                  | . | Gorai.    | . |
| 010G011900.1       | .                  | .                  | . | .                  | . | .         | . |
| .                  | .                  | .                  | . | .                  | . | .         | . |
| Vv18g1023          | .                  | .                  | . | .                  | . | .         | . |
| .                  | .                  | .                  | . | .                  | . | Vv04g1043 | . |
| .                  | Tc01_g003740       | Gorai.007G051300.1 | . | .                  | . | Gorai.    | . |
| 007G206700.1       | .                  | Gorai.011G102800.1 | . | .                  | . | .         | . |
| Vv18g1024          | Tc08_g001720       | .                  | . | .                  | . | .         | . |
| .                  | .                  | .                  | . | .                  | . | .         | . |
| .                  | .                  | .                  | . | .                  | . | .         | . |
| Vv18g1025          | Tc08_g001730       | .                  | . | Gorai.005G107000.1 | . | .         | . |
| Gorai.009G204600.1 | Gorai.009G274000.1 | .                  | . | .                  | . | .         | . |
| .                  | .                  | .                  | . | Vv04g1047          | . | .         | . |
| .                  | .                  | .                  | . | .                  | . | .         | . |
| Vv18g1026          | Tc08_g001740       | .                  | . | Gorai.009G204500.1 | . | .         | . |
| .                  | .                  | .                  | . | .                  | . | .         | . |
| .                  | .                  | .                  | . | .                  | . | .         | . |
| Vv18g1027          | Tc08_g012960       | .                  | . | .                  | . | .         | . |
| .                  | .                  | .                  | . | .                  | . | .         | . |
| .                  | .                  | .                  | . | .                  | . | .         | . |
| Vv18g1028          | Tc08_g001750       | .                  | . | .                  | . | .         | . |
| .                  | .                  | .                  | . | .                  | . | .         | . |
| .                  | .                  | .                  | . | .                  | . | .         | . |
| Vv18g1029          | .                  | .                  | . | .                  | . | .         | . |
| .                  | .                  | .                  | . | .                  | . | .         | . |
| .                  | .                  | .                  | . | .                  | . | .         | . |
| Vv18g1030          | .                  | .                  | . | .                  | . | .         | . |

|                    |                    |                    |              |                    |           |           |   |
|--------------------|--------------------|--------------------|--------------|--------------------|-----------|-----------|---|
| .                  | .                  | .                  | .            | .                  | .         | .         | . |
| .                  | .                  | .                  | .            | .                  | .         | .         | . |
| Vv18g1031          | .                  | .                  | .            | Gorai.009G204400.1 | .         | .         | . |
| .                  | .                  | .                  | .            | .                  | .         | .         | . |
| Vv18g1032          | .                  | .                  | .            | .                  | .         | .         | . |
| .                  | .                  | .                  | .            | .                  | .         | .         | . |
| Vv18g1033          | .                  | .                  | .            | .                  | .         | .         | . |
| .                  | .                  | .                  | .            | .                  | .         | .         | . |
| Vv18g1034          | .                  | .                  | .            | .                  | .         | .         | . |
| .                  | .                  | .                  | .            | .                  | .         | .         | . |
| Vv18g1035          | Tc08_g001760       | Gorai.002G129600.1 | .            | .                  | .         | .         | . |
|                    | Gorai.009G273900.1 | Gorai.010G011800.1 | .            | .                  | .         | .         | . |
| .                  | .                  | .                  | .            | .                  | .         | .         | . |
| .                  | .                  | .                  | .            | .                  | .         | .         | . |
| Vv18g1036          | Tc08_g001770       | Gorai.002G129500.1 | .            | .                  | .         | .         | . |
| Gorai.009G204300.1 | .                  | Gorai.010G011700.1 | .            | .                  | Vv03g0511 | .         | . |
| .                  | Gorai.013G052800.1 | .                  | .            | .                  | Gorai.    | .         | . |
| 008G018900.1       | .                  | .                  | .            | .                  | .         | .         | . |
| .                  | .                  | .                  | .            | .                  | .         | .         | . |
| Vv18g1037          | .                  | .                  | .            | .                  | .         | .         | . |
| .                  | .                  | .                  | .            | .                  | .         | .         | . |
| Vv18g1038          | .                  | .                  | .            | .                  | .         | .         | . |
| .                  | .                  | .                  | .            | .                  | .         | .         | . |
| Vv18g1039          | .                  | .                  | .            | .                  | .         | .         | . |
| .                  | .                  | .                  | .            | .                  | .         | .         | . |
| Vv18g1040          | .                  | .                  | .            | .                  | .         | .         | . |
| .                  | .                  | .                  | .            | .                  | .         | Vv04g1059 | . |
|                    | Tc01_g003580       | Gorai.008G068900.1 | .            | .                  | Gorai.    | .         | . |
| 007G205700.1       | .                  | .                  | .            | .                  | .         | .         | . |
| Vv18g1041          | Tc08_g001790       | .                  | .            | .                  | .         | .         | . |
| Gorai.010G011500.1 | Vv03g0510          | .                  | .            | .                  | .         | .         | . |
| .                  | Gorai.012G146400.1 | .                  | .            | .                  | .         | .         | . |
| .                  | .                  | .                  | .            | .                  | .         | .         | . |
| Vv18g1042          | Tc08_g001800       | Gorai.002G129300.1 | .            | .                  | .         | .         | . |
| Gorai.009G204100.1 | .                  | .                  | .            | .                  | .         | .         | . |
| .                  | .                  | Vv04g1063          | Tc01_g003540 | .                  | .         | .         | . |
| .                  | Gorai.003G016400.1 | .                  | .            | .                  | .         | .         | . |
| Vv18g1043          | .                  | .                  | .            | .                  | .         | .         | . |
| .                  | .                  | .                  | .            | .                  | .         | .         | . |
| Vv18g1044          | .                  | .                  | .            | .                  | .         | .         | . |
| .                  | .                  | .                  | .            | .                  | .         | .         | . |
| .                  | .                  | .                  | .            | .                  | .         | .         | . |



|                    |                    |                    |                    |   |
|--------------------|--------------------|--------------------|--------------------|---|
| Vv18g1061          | Tc08_g001890       | .                  | Gorai.005G107300.1 | . |
| Gorai.009G203500.1 | Gorai.009G273700.1 | .                  | Gorai.010G010900.1 | . |
| .                  | .                  | .                  | .                  | . |
| Vv18g1062          | Tc08_g001900       | .                  | Gorai.005G107400.1 | . |
| .                  | Gorai.010G010800.1 | .                  | .                  | . |
| .                  | .                  | .                  | .                  | . |
| Vv18g1063          | Tc08_g001910       | .                  | Gorai.009G203400.1 | . |
| Gorai.009G273600.1 | .                  | .                  | .                  | . |
| .                  | .                  | Vv04g1077          | Tc01_g003470       | . |
| .                  | Gorai.007G205100.1 | Gorai.003G016100.1 | .                  | . |
| Vv18g1064          | Tc08_g001920       | Gorai.002G128700.1 | .                  | . |
| Gorai.009G203300.1 | .                  | .                  | .                  | . |
| .                  | .                  | Vv04g1080          | Tc01_g003450       | . |
| Gorai.008G068600.1 | .                  | .                  | .                  | . |
| Vv18g1065          | .                  | .                  | .                  | . |
| .                  | .                  | .                  | .                  | . |
| .                  | .                  | .                  | .                  | . |
| Vv18g1066          | Tc08_g001930       | .                  | Gorai.009G203200.1 | . |
| .                  | Gorai.010G010700.1 | .                  | .                  | . |
| .                  | .                  | Vv04g1081          | Tc01_g003430       | . |
| .                  | Gorai.007G204600.1 | Gorai.003G015900.1 | .                  | . |
| Vv18g1067          | Tc08_g001940       | Gorai.002G128600.1 | .                  | . |
| .                  | .                  | .                  | .                  | . |
| .                  | .                  | .                  | .                  | . |
| Vv18g1068          | .                  | Gorai.002G128500.1 | .                  | . |
| .                  | .                  | .                  | .                  | . |
| .                  | .                  | .                  | .                  | . |
| Vv18g1069          | .                  | .                  | Gorai.009G203100.1 | . |
| .                  | .                  | .                  | .                  | . |
| .                  | .                  | .                  | .                  | . |
| Vv18g1070          | .                  | .                  | .                  | . |
| .                  | .                  | .                  | .                  | . |
| .                  | .                  | .                  | .                  | . |
| Vv18g1071          | .                  | .                  | .                  | . |
| .                  | .                  | .                  | .                  | . |
| .                  | .                  | .                  | .                  | . |
| Vv18g1072          | .                  | .                  | .                  | . |
| .                  | .                  | .                  | .                  | . |
| .                  | .                  | .                  | .                  | . |
| Vv18g1073          | Tc08_g001960       | Gorai.002G128400.1 | .                  | . |
| Gorai.009G203000.1 | .                  | .                  | .                  | . |
| .                  | .                  | .                  | .                  | . |
| .                  | .                  | .                  | .                  | . |
| Vv18g1074          | Tc08_g001970       | Gorai.002G128300.1 | .                  | . |
| Gorai.009G273500.1 | .                  | .                  | .                  | . |
| .                  | .                  | .                  | .                  | . |
| .                  | .                  | .                  | .                  | . |

|                    |                    |                    |                    |                    |
|--------------------|--------------------|--------------------|--------------------|--------------------|
| Vv18g1075          | Tc08_g001980       | .                  | .                  | Gorai.009G202900.1 |
| .                  | Vv03g0480          | .                  | Tc02_g007080       | .                  |
| Gorai.005G243100.1 | .                  | .                  | .                  | .                  |
| .                  | .                  | .                  | .                  | .                  |
| Vv18g1076          | Tc08_g001990       | .                  | Gorai.005G107800.1 | .                  |
| Gorai.009G202800.1 | .                  | Gorai.010G010600.1 | .                  | .                  |
| .                  | .                  | .                  | .                  | .                  |
| .                  | .                  | .                  | .                  | .                  |
| Vv18g1077          | .                  | .                  | .                  | .                  |
| .                  | .                  | .                  | .                  | .                  |
| .                  | .                  | .                  | .                  | .                  |
| Vv18g1078          | .                  | .                  | .                  | .                  |
| .                  | .                  | .                  | .                  | .                  |
| .                  | .                  | .                  | .                  | .                  |
| Vv18g1079          | Tc08_g002030       | .                  | Gorai.009G202400.1 | .                  |
| .                  | Vv03g0475          | .                  | Tc02_g007030       | Gorai.             |
| 013G037200.1       | .                  | .                  | .                  | .                  |
| .                  | .                  | .                  | .                  | .                  |
| Vv18g1080          | Tc08_g002050       | Gorai.002G128000.1 | .                  | .                  |
| Gorai.009G202100.1 | .                  | .                  | .                  | .                  |
| .                  | .                  | .                  | .                  | .                  |
| .                  | .                  | .                  | .                  | .                  |
| Vv18g1081          | Tc08_g002060       | .                  | Gorai.009G202000.1 | .                  |
| .                  | .                  | .                  | .                  | .                  |
| .                  | .                  | .                  | .                  | .                  |
| Vv18g1082          | Tc08_g002070       | .                  | Gorai.009G201900.1 | .                  |
| .                  | Gorai.010G010300.1 | .                  | .                  | .                  |
| .                  | .                  | .                  | .                  | .                  |
| .                  | .                  | .                  | .                  | .                  |
| Vv18g1083          | Tc08_g002080       | .                  | .                  | .                  |
| .                  | .                  | .                  | .                  | .                  |
| .                  | .                  | .                  | .                  | .                  |
| Vv18g1084          | Tc08_g002090       | Gorai.002G127900.1 | .                  | .                  |
| .                  | .                  | .                  | .                  | .                  |
| .                  | .                  | .                  | .                  | .                  |
| Vv18g1085          | Tc08_g002100       | .                  | Gorai.009G201800.1 | .                  |
| .                  | Gorai.010G010200.1 | .                  | .                  | .                  |
| .                  | .                  | .                  | .                  | .                  |
| .                  | .                  | .                  | .                  | .                  |
| Vv18g1086          | .                  | .                  | .                  | .                  |
| .                  | .                  | .                  | .                  | .                  |
| .                  | .                  | .                  | .                  | .                  |
| Vv18g1087          | Tc08_g002130       | Gorai.002G127700.1 | .                  | .                  |
| .                  | Gorai.010G010100.1 | .                  | .                  | .                  |
| .                  | .                  | .                  | .                  | .                  |
| .                  | .                  | .                  | .                  | .                  |
| Vv18g1088          | Tc08_g002140       | .                  | Gorai.009G201700.1 | .                  |
| Gorai.009G273300.1 | .                  | Gorai.010G010000.1 | .                  | .                  |
| .                  | .                  | .                  | .                  | .                  |
| .                  | .                  | .                  | .                  | .                  |

|                    |                    |                    |                    |                    |
|--------------------|--------------------|--------------------|--------------------|--------------------|
| Vv18g1089          | Tc08_g002150       | .                  | Gorai.005G107900.1 | .                  |
|                    | Gorai.009G273200.1 | .                  | .                  | .                  |
| .                  | .                  | .                  | Vv04g1117          | Tc01_g003180       |
| .                  | .                  | .                  | Gorai.003G014500.1 | .                  |
| Vv18g1090          | Tc08_g002160       | .                  | Gorai.005G108000.1 | .                  |
| Gorai.009G201600.1 | .                  | .                  | Vv03g0464          | .                  |
| Tc02_g006950       | .                  | Gorai.005G244100.1 | .                  | .                  |
| .                  | .                  | .                  | .                  | .                  |
| Vv18g1091          | .                  | .                  | .                  | .                  |
| .                  | .                  | .                  | .                  | .                  |
| .                  | .                  | .                  | .                  | .                  |
| Vv18g1092          | Tc08_g002170       | .                  | Gorai.005G108100.1 | .                  |
| .                  | Gorai.010G009900.1 | .                  | .                  | .                  |
| .                  | .                  | .                  | Vv04g1123          | Tc01_g003130       |
| Gorai.007G050600.1 | .                  | .                  | Gorai.007G202700.1 | .                  |
| Vv18g1093          | .                  | .                  | .                  | .                  |
| .                  | .                  | .                  | .                  | .                  |
| .                  | .                  | .                  | .                  | .                  |
| Vv18g1094          | Tc08_g002200       | .                  | Gorai.002G127500.1 | .                  |
| Gorai.009G201300.1 | .                  | .                  | .                  | .                  |
| .                  | .                  | .                  | Vv04g1125          | Tc01_g003110       |
| Gorai.007G050500.1 | .                  | .                  | Gorai.007G202500.1 | Gorai.             |
| 003G014100.1       | .                  | .                  | .                  | .                  |
| Vv18g1095          | Tc08_g002220       | .                  | Gorai.002G127300.1 | .                  |
| Gorai.009G201200.1 | .                  | Gorai.009G273000.1 | .                  | Vv03g0461          |
|                    | Tc02_g006880       | Gorai.013G036700.1 | .                  | .                  |
|                    | Gorai.012G155400.1 | .                  | .                  | .                  |
| .                  | .                  | .                  | .                  | .                  |
| Vv18g1096          | Tc08_g002230       | .                  | Gorai.002G127200.1 | .                  |
| .                  | .                  | .                  | .                  | .                  |
| .                  | .                  | .                  | .                  | .                  |
|                    | Vv04g1129          | Tc01_g003080       | .                  | .                  |
| Gorai.007G202100.1 | Gorai.003G014000.1 | Gorai.011G101500.1 | .                  | .                  |
| Vv18g1097          | Tc08_g002240       | .                  | .                  | .                  |
| Gorai.010G009700.1 | .                  | .                  | .                  | .                  |
| .                  | .                  | .                  | .                  | .                  |
| Vv18g1098          | Tc08_g002250       | .                  | .                  | .                  |
| Gorai.010G009600.1 | .                  | .                  | .                  | .                  |
| .                  | .                  | .                  | .                  | .                  |
| Vv18g1099          | Tc08_g002260       | .                  | Gorai.005G108300.1 | .                  |
| .                  | Gorai.010G009500.1 | .                  | .                  | .                  |
| .                  | .                  | .                  | .                  | .                  |
| .                  | .                  | .                  | .                  | .                  |
| Vv18g1100          | Tc08_g002270       | .                  | .                  | Gorai.009G201100.1 |
|                    | Gorai.009G272900.1 | Gorai.010G009400.1 | .                  | .                  |
| .                  | .                  | .                  | .                  | Vv04g1132          |
| Tc01_g003050       | Gorai.007G050300.1 | Gorai.008G067400.1 | .                  | .                  |
| .                  | Gorai.011G101400.1 | .                  | .                  | .                  |
| Vv18g1101          | Tc08_g002280       | .                  | .                  | Gorai.009G201000.1 |
|                    | Gorai.009G272700.1 | .                  | Vv03g0454          | .                  |
| Tc02_g006830       | .                  | Gorai.005G244300.1 | .                  | .                  |



|                    |                    |                    |                    |   |
|--------------------|--------------------|--------------------|--------------------|---|
| Vv18g1102          | Tc08_g002290       | Gorai.002G127100.1 | .                  | . |
| Gorai.009G200900.1 | Gorai.009G272400.1 | .                  | .                  | . |
| .                  | .                  | .                  | .                  | . |
| Vv18g1103          | Tc08_g002300       | Gorai.002G127000.1 | .                  | . |
| .                  | Vv03g0450          | .                  | .                  | . |
| .                  | .                  | .                  | .                  | . |
| Vv18g1104          | Tc08_g002320       | .                  | .                  | . |
| Gorai.010G009200.1 | Vv03g0441          | Tc02_g006720       | Gorai.             | . |
| 013G035900.1       | Gorai.005G244700.1 | .                  | Gorai.008G029700.1 | . |
| .                  | Vv04g1140          | Tc01_g002960       | .                  | . |
| Gorai.003G013600.1 | .                  | .                  | .                  | . |
| Vv18g1105          | Gorai.002G126800.1 | .                  | .                  | . |
| .                  | .                  | .                  | .                  | . |
| Vv18g1106          | Tc08_g002330       | .                  | .                  | . |
| .                  | .                  | .                  | .                  | . |
| Vv04g1142          | Tc01_g002940       | .                  | Gorai.007G201900.1 | . |
| Gorai.003G013500.1 | .                  | .                  | .                  | . |
| Vv18g1107          | Tc08_g002340       | .                  | Gorai.009G200800.1 | . |
| Gorai.009G272300.1 | .                  | .                  | .                  | . |
| .                  | .                  | .                  | .                  | . |
| Vv18g1108          | Tc08_g002350       | Gorai.002G126700.1 | .                  | . |
| Gorai.009G272200.1 | Gorai.010G009100.1 | .                  | .                  | . |
| .                  | .                  | .                  | .                  | . |
| Vv18g1109          | Tc08_g002360       | .                  | .                  | . |
| Gorai.010G009000.1 | .                  | .                  | .                  | . |
| .                  | Vv04g1144          | .                  | Gorai.             | . |
| 007G201800.1       | Gorai.003G013400.1 | .                  | .                  | . |
| Vv18g1110          | Tc08_g002370       | .                  | Gorai.009G200700.1 | . |
| .                  | .                  | .                  | .                  | . |
| Vv18g1111          | .                  | .                  | .                  | . |
| .                  | .                  | .                  | Vv04g1145          | . |
| .                  | .                  | .                  | .                  | . |
| Vv18g1112          | .                  | .                  | .                  | . |
| .                  | .                  | .                  | .                  | . |
| Vv18g1113          | Tc08_g002380       | .                  | Gorai.009G200600.1 | . |
| .                  | Gorai.010G008900.1 | .                  | .                  | . |
| .                  | .                  | .                  | .                  | . |
| Vv18g1114          | .                  | .                  | .                  | . |
| .                  | .                  | .                  | .                  | . |
| Vv18g1115          | Tc08_g002390       | .                  | .                  | . |

|                    |                    |                    |        |                    |           |   |
|--------------------|--------------------|--------------------|--------|--------------------|-----------|---|
| Gorai.010G008800.1 | .                  | .                  | .      | .                  | .         | . |
| Vv18g1116          | .                  | .                  | .      | .                  | .         | . |
| Vv18g1117          | Tc08_g002400       | .                  | .      | Gorai.009G200500.1 | .         | . |
| .                  | Vv04g1149          | Tc01_g002880       | .      | .                  | .         | . |
| Gorai.007G201600.1 | .                  | .                  | .      | .                  | .         | . |
| Vv18g1118          | Tc08_g002410       | .                  | .      | Gorai.009G200400.1 | .         | . |
| Tc02_g006690       | Gorai.010G008700.1 | Vv03g0436          | .      | .                  | .         | . |
| .                  | Gorai.013G035800.1 | Gorai.005G244900.1 | .      | .                  | .         | . |
| Vv18g1119          | Tc08_g002420       | .                  | .      | Gorai.009G200300.1 | .         | . |
| Vv18g1120          | Tc08_g002440       | .                  | .      | Gorai.             | .         | . |
| 009G272000.1       | .                  | .                  | .      | .                  | .         | . |
| Vv18g1121          | Tc08_g002450       | Gorai.002G126600.1 | Gorai. | .                  | .         | . |
| 005G109100.1       | Gorai.009G200200.1 | Gorai.009G271900.1 | .      | .                  | .         | . |
| Vv04g1152          | Tc01_g002860       | Gorai.008G066400.1 | .      | .                  | .         | . |
| Gorai.007G201500.1 | .                  | Gorai.011G100900.1 | .      | .                  | .         | . |
| Vv18g1122          | Tc08_g002460       | .                  | .      | .                  | .         | . |
| Vv18g1123          | .                  | .                  | .      | .                  | .         | . |
| Tc01_g002800       | .                  | Gorai.008G066300.1 | .      | .                  | Vv04g1154 | . |
| Vv18g1124          | Tc08_g002470       | .                  | .      | Gorai.009G200100.1 | .         | . |
| Tc02_g006610       | Gorai.010G008500.1 | Vv03g0433          | .      | .                  | .         | . |
| Vv04g1159          | Gorai.005G245200.1 | Gorai.008G066100.1 | .      | .                  | .         | . |
| Vv18g1125          | .                  | .                  | .      | .                  | Vv04g1161 | . |
| Vv18g1126          | Tc08_g002490       | .                  | .      | .                  | .         | . |
| Vv04g1163          | Tc01_g002770       | .                  | .      | .                  | .         | . |
| Vv18g1127          | .                  | .                  | .      | .                  | .         | . |
| Vv18g1128          | Tc08_g002500       | .                  | .      | Gorai.009G200000.1 | .         | . |
| .                  | Gorai.010G008400.1 | .                  | .      | .                  | .         | . |
| .                  | .                  | .                  | .      | .                  | .         | . |
| .                  | .                  | .                  | .      | .                  | .         | . |

|                    |                    |                    |                    |                    |   |           |
|--------------------|--------------------|--------------------|--------------------|--------------------|---|-----------|
| Vv18g1129          | .                  | .                  | .                  | .                  | . | .         |
| Vv03g0431          | Tc02_g006560       | .                  | .                  | Gorai.005G245400.1 | . | .         |
| .                  | .                  | .                  | .                  | .                  | . | .         |
| .                  | .                  | .                  | .                  | .                  | . | .         |
| Vv18g1130          | .                  | .                  | .                  | .                  | . | .         |
| Vv03g0430          | .                  | .                  | .                  | .                  | . | .         |
| .                  | .                  | .                  | .                  | .                  | . | .         |
| Vv18g1131          | Tc08_g002530       | .                  | .                  | Gorai.005G109200.1 | . | .         |
| Gorai.009G199800.1 | .                  | .                  | .                  | Vv03g0428          | . | .         |
| Tc02_g006540       | Gorai.013G035400.1 | .                  | .                  | Gorai.005G245500.1 | . | .         |
|                    | Gorai.008G030300.1 | .                  | .                  | Gorai.012G155100.1 | . | Vv04g1184 |
|                    | Tc01_g002610       | .                  | .                  | Gorai.007G200700.1 | . | .         |
| Gorai.003G013000.1 | Gorai.011G100700.1 | .                  | .                  | .                  | . | .         |
| Vv18g1132          | Tc08_g002540       | .                  | .                  | Gorai.005G109300.1 | . | .         |
| Gorai.009G199700.1 | .                  | .                  | .                  | Gorai.010G008300.1 | . | .         |
| .                  | .                  | .                  | .                  | .                  | . | .         |
| .                  | .                  | .                  | .                  | .                  | . | .         |
| Vv18g1133          | Tc08_g002550       | .                  | .                  | Gorai.009G199600.1 | . | .         |
| .                  | Gorai.010G008200.1 | .                  | .                  | .                  | . | .         |
| .                  | .                  | .                  | .                  | .                  | . | .         |
| .                  | .                  | .                  | .                  | .                  | . | .         |
| Vv18g1134          | Tc08_g002560       | .                  | .                  | Gorai.009G199500.1 | . | .         |
| .                  | .                  | .                  | .                  | .                  | . | .         |
| .                  | .                  | .                  | .                  | .                  | . | .         |
| .                  | .                  | .                  | .                  | .                  | . | .         |
| Vv18g1135          | Tc08_g002570       | .                  | .                  | .                  | . | .         |
| Gorai.010G008100.1 | .                  | .                  | .                  | .                  | . | .         |
| .                  | .                  | .                  | .                  | .                  | . | .         |
| .                  | .                  | .                  | .                  | .                  | . | .         |
| Vv18g1136          | .                  | .                  | .                  | .                  | . | .         |
| .                  | .                  | .                  | .                  | .                  | . | .         |
| .                  | .                  | .                  | .                  | .                  | . | .         |
| .                  | .                  | .                  | .                  | .                  | . | .         |
| Vv18g1137          | Tc08_g002580       | .                  | .                  | .                  | . | .         |
| .                  | .                  | .                  | .                  | .                  | . | .         |
| .                  | .                  | .                  | .                  | .                  | . | .         |
| .                  | .                  | .                  | .                  | .                  | . | .         |
| Vv18g1138          | Tc08_g002590       | .                  | .                  | Gorai.005G109500.1 | . | .         |
| Gorai.009G199400.1 | .                  | .                  | .                  | .                  | . | .         |
| .                  | .                  | .                  | .                  | .                  | . | .         |
| .                  | .                  | .                  | .                  | .                  | . | .         |
| Vv18g1139          | Tc08_g002600       | Gorai.002G126500.1 | Gorai.             | .                  | . | .         |
| 005G109600.1       | Gorai.009G199300.1 | .                  | Gorai.010G008000.1 | .                  | . | .         |
|                    | Vv03g0425          | Tc02_g006520       | Gorai.013G035200.1 | .                  | . | .         |
| Gorai.005G245700.1 | .                  | .                  | Gorai.012G155000.1 | .                  | . | .         |
| Vv04g1187          | Tc01_g002580       | .                  | Gorai.008G065300.1 | .                  | . | .         |
| Gorai.007G200600.1 | .                  | .                  | .                  | .                  | . | .         |
| Vv18g1140          | Tc08_g002610       | .                  | .                  | .                  | . | .         |
| Gorai.010G007900.1 | .                  | .                  | .                  | .                  | . | .         |
| .                  | .                  | .                  | .                  | .                  | . | .         |
| .                  | .                  | .                  | .                  | .                  | . | .         |
| Vv18g1141          | Tc08_g002620       | .                  | Gorai.005G109800.1 | .                  | . | .         |
| Gorai.009G199100.1 | .                  | .                  | Vv03g0421          | .                  | . | .         |
| Gorai.013G034900.1 | .                  | .                  | Gorai.008G030700.1 | .                  | . | .         |
| .                  | .                  | .                  | .                  | .                  | . | .         |

|                    |                    |                    |                    |                    |        |
|--------------------|--------------------|--------------------|--------------------|--------------------|--------|
| Vv18g1142          | Tc08_g002630       | .                  | .                  | .                  | Gorai. |
| 009G271700.1       | .                  | .                  | .                  | .                  | .      |
| Vv18g1143          | Tc08_g002650       | .                  | .                  | Gorai.009G199000.1 | .      |
| .                  | .                  | .                  | .                  | .                  | .      |
| Vv18g1144          | .                  | .                  | .                  | .                  | .      |
| .                  | .                  | .                  | .                  | .                  | .      |
| Vv18g1145          | Tc08_g002660       | .                  | Gorai.005G109900.1 | .                  | .      |
| Gorai.009G198900.1 | Gorai.009G271600.1 | .                  | .                  | .                  | .      |
| .                  | .                  | .                  | .                  | .                  | .      |
| Vv18g1146          | Tc08_g002670       | .                  | Gorai.009G198800.1 | .                  | .      |
| .                  | Vv04g1197          | Tc01_g002520       | .                  | .                  | .      |
| Gorai.007G199800.1 | Gorai.003G012600.1 | .                  | .                  | .                  | .      |
| .                  | .                  | .                  | .                  | .                  | .      |
| Vv18g1147          | Tc08_g002680       | .                  | Gorai.009G198700.1 | .                  | .      |
| .                  | .                  | .                  | .                  | .                  | .      |
| Vv18g1148          | .                  | .                  | .                  | .                  | .      |
| .                  | .                  | .                  | .                  | .                  | .      |
| Vv18g1149          | Tc08_g002690       | .                  | Gorai.009G198600.1 | .                  | .      |
| .                  | .                  | .                  | .                  | .                  | .      |
| Vv18g1150          | Tc08_g002700       | .                  | .                  | .                  | .      |
| Gorai.010G007800.1 | Vv03g0006          | Tc02_g007610       | Gorai.             | .                  | .      |
| 013G034600.1       | Gorai.005G246400.1 | .                  | Gorai.008G031100.1 | .                  | .      |
| .                  | .                  | .                  | .                  | .                  | .      |
| Vv18g1151          | Tc08_g002710       | .                  | Gorai.009G198500.1 | .                  | .      |
| .                  | Gorai.010G007700.1 | .                  | .                  | .                  | .      |
| .                  | .                  | .                  | .                  | .                  | .      |
| Vv18g1152          | .                  | .                  | .                  | .                  | .      |
| .                  | .                  | .                  | .                  | .                  | .      |
| Vv18g1153          | Tc08_g002730       | .                  | .                  | .                  | .      |
| Gorai.010G007600.1 | .                  | .                  | .                  | .                  | .      |
| .                  | .                  | .                  | .                  | .                  | .      |
| Vv18g1154          | Gorai.002G126400.1 | .                  | Gorai.             | .                  | .      |
| 009G198400.1       | .                  | .                  | .                  | .                  | .      |
| .                  | Vv04g1217          | .                  | .                  | .                  | .      |
| Gorai.003G012200.1 | .                  | .                  | .                  | .                  | .      |
| Vv18g1155          | .                  | .                  | .                  | .                  | .      |
| .                  | .                  | .                  | .                  | .                  | .      |
| Vv18g1156          | Tc08_g002740       | Gorai.002G126300.1 | .                  | .                  | .      |
| Gorai.009G198300.1 | .                  | Gorai.010G007500.1 | .                  | .                  | .      |
| .                  | .                  | .                  | .                  | .                  | .      |

|                    |                    |                    |                    |                    |
|--------------------|--------------------|--------------------|--------------------|--------------------|
| Vv18g1157          | Tc08_g002750       | .                  | .                  | Gorai.009G198200.1 |
| .                  | Gorai.010G007400.1 | .                  | .                  | .                  |
| .                  | .                  | .                  | .                  | .                  |
| Vv18g1158          | Tc08_g002760       | .                  | .                  | .                  |
| .                  | .                  | .                  | .                  | .                  |
| .                  | .                  | .                  | .                  | .                  |
| Vv18g1159          | Tc08_g002770       | .                  | .                  | Gorai.009G198100.1 |
| .                  | Gorai.010G007300.1 | .                  | .                  | .                  |
| .                  | .                  | .                  | .                  | .                  |
| Vv18g1160          | .                  | .                  | .                  | .                  |
| .                  | .                  | .                  | .                  | .                  |
| Vv18g1161          | .                  | .                  | .                  | .                  |
| .                  | .                  | .                  | .                  | .                  |
| Vv18g1162          | .                  | .                  | .                  | .                  |
| .                  | .                  | .                  | .                  | .                  |
| Vv18g1163          | .                  | .                  | .                  | .                  |
| .                  | .                  | .                  | .                  | .                  |
| Vv18g1164          | .                  | .                  | .                  | .                  |
| Vv03g0011          | Tc02_g007580       | .                  | Gorai.005G246600.1 | .                  |
| .                  | Vv04g1226          | .                  | Tc01_g002380       | .                  |
| Gorai.007G198900.1 | .                  | Gorai.003G011900.1 | .                  | .                  |
| Vv18g1165          | Tc08_g002780       | .                  | Gorai.002G126200.1 | Gorai.             |
| 005G110000.1       | .                  | .                  | .                  | .                  |
| .                  | .                  | Vv04g1227          | Tc01_g002370       | .                  |
| .                  | Gorai.007G198800.1 | .                  | Gorai.011G100200.1 | .                  |
| Vv18g1166          | Tc08_g002790       | .                  | Gorai.002G126100.1 | .                  |
| Gorai.009G198000.1 | .                  | Gorai.010G007200.1 | .                  | .                  |
| .                  | .                  | .                  | .                  | .                  |
| Vv18g1167          | Tc08_g002800       | .                  | .                  | Gorai.009G197900.1 |
| .                  | .                  | .                  | .                  | .                  |
| .                  | .                  | .                  | .                  | .                  |
| Vv18g1168          | Tc08_g002810       | .                  | Gorai.002G126000.1 | .                  |
| .                  | .                  | .                  | .                  | .                  |
| Vv18g1169          | .                  | .                  | .                  | .                  |
| .                  | .                  | .                  | .                  | .                  |
| Vv18g1170          | .                  | .                  | .                  | Gorai.009G271500.1 |
| .                  | .                  | .                  | .                  | .                  |
| Vv18g1171          | Tc08_g002820       | .                  | .                  | .                  |
| .                  | .                  | .                  | .                  | .                  |

|                    |                    |                    |        |                    |   |   |   |
|--------------------|--------------------|--------------------|--------|--------------------|---|---|---|
| Vv18g1172          | .                  | .                  | .      | .                  | . | . | . |
| .                  | .                  | .                  | .      | .                  | . | . | . |
| Vv18g1173          | Tc08_g002830       | .                  | .      | Gorai.005G110100.1 | . | . | . |
| Gorai.009G197800.1 | Gorai.009G271400.1 | .                  | .      | .                  | . | . | . |
| .                  | .                  | .                  | .      | .                  | . | . | . |
| Vv18g1174          | Tc08_g002840       | .                  | .      | Gorai.009G197700.1 | . | . | . |
| .                  | Vv03g0015          | .                  | .      | Gorai.013G034000.1 | . | . | . |
| Gorai.005G246800.1 | .                  | .                  | .      | .                  | . | . | . |
| .                  | .                  | .                  | .      | .                  | . | . | . |
| Vv18g1175          | Tc08_g002850       | .                  | .      | Gorai.009G197600.1 | . | . | . |
| .                  | Gorai.010G007100.1 | .                  | .      | Vv03g0016          | . | . | . |
| Tc02_g007550       | .                  | .                  | .      | .                  | . | . | . |
| .                  | .                  | .                  | .      | .                  | . | . | . |
| Vv18g1176          | .                  | .                  | .      | .                  | . | . | . |
| .                  | .                  | .                  | .      | .                  | . | . | . |
| .                  | .                  | .                  | .      | .                  | . | . | . |
| Vv18g1177          | .                  | .                  | .      | .                  | . | . | . |
| .                  | .                  | .                  | .      | .                  | . | . | . |
| .                  | .                  | .                  | .      | .                  | . | . | . |
| Vv18g1178          | Tc08_g002860       | .                  | .      | Gorai.             | . | . | . |
| 009G271300.1       | .                  | .                  | .      | .                  | . | . | . |
| .                  | .                  | .                  | .      | .                  | . | . | . |
| Vv18g1179          | Tc08_g002870       | Gorai.002G125900.1 | .      | .                  | . | . | . |
| Gorai.009G197500.1 | .                  | Gorai.010G006900.1 | .      | .                  | . | . | . |
| .                  | .                  | Vv04g1230          | .      | .                  | . | . | . |
| Tc01_g002360       | .                  | Gorai.007G198700.1 | .      | .                  | . | . | . |
| Gorai.011G100100.1 | .                  | .                  | .      | .                  | . | . | . |
| Vv18g1180          | Tc08_g002880       | Gorai.002G125800.1 | .      | .                  | . | . | . |
| Gorai.009G271200.1 | .                  | .                  | .      | .                  | . | . | . |
| .                  | .                  | .                  | .      | .                  | . | . | . |
| .                  | .                  | .                  | .      | .                  | . | . | . |
| Vv18g1181          | .                  | Gorai.005G110200.1 | Gorai. | .                  | . | . | . |
| 009G197400.1       | .                  | .                  | .      | .                  | . | . | . |
| .                  | .                  | .                  | .      | .                  | . | . | . |
| .                  | .                  | .                  | .      | .                  | . | . | . |
| Vv18g1182          | .                  | .                  | .      | .                  | . | . | . |
| .                  | .                  | .                  | .      | .                  | . | . | . |
| .                  | .                  | .                  | .      | .                  | . | . | . |
| Vv18g1183          | Tc08_g002890       | .                  | .      | .                  | . | . | . |
| .                  | .                  | .                  | .      | .                  | . | . | . |
| .                  | .                  | .                  | .      | .                  | . | . | . |
| Vv18g1184          | .                  | .                  | .      | .                  | . | . | . |
| .                  | .                  | .                  | .      | .                  | . | . | . |
| .                  | .                  | .                  | .      | .                  | . | . | . |
| Vv18g1185          | .                  | .                  | .      | .                  | . | . | . |
| Vv03g0020          | Tc02_g007540       | Gorai.013G033800.1 | Gorai. | .                  | . | . | . |
| 005G247000.1       | .                  | .                  | .      | .                  | . | . | . |

|                    |                    |                    |                    |        |
|--------------------|--------------------|--------------------|--------------------|--------|
| Vv18g1186          | Tc08_g002900       | Gorai.002G125700.1 | .                  | .      |
| .                  | .                  | Vv03g0021          | Tc02_g007530       | Gorai. |
| 013G033700.1       | .                  | Gorai.002G004800.1 | .                  | .      |
| .                  | .                  | .                  | .                  | .      |
| Vv18g1187          | .                  | .                  | .                  | .      |
| .                  | .                  | .                  | .                  | .      |
| .                  | .                  | .                  | .                  | .      |
| Vv18g1188          | Tc08_g002910       | Gorai.002G125600.1 | Gorai.             | .      |
| 005G110600.1       | Gorai.009G197300.1 | .                  | Gorai.010G006800.1 | .      |
| .                  | Vv03g0023          | Tc02_g007510       | Gorai.013G033500.1 | .      |
| Gorai.005G247100.1 | .                  | .                  | Vv04g1235          | .      |
| Tc01_g002320       | .                  | Gorai.007G198100.1 | Gorai.             | .      |
| 003G011800.1       | .                  | .                  | .                  | .      |
| Vv18g1189          | Tc08_g002920       | .                  | .                  | .      |
| .                  | .                  | .                  | .                  | .      |
| .                  | .                  | .                  | .                  | .      |
| Vv18g1190          | Tc08_g002940       | Gorai.002G125500.1 | .                  | .      |
| Gorai.009G197200.1 | .                  | .                  | .                  | .      |
| .                  | .                  | .                  | .                  | .      |
| .                  | .                  | .                  | .                  | .      |
| Vv18g1191          | Tc08_g002950       | .                  | .                  | Gorai. |
| 009G271100.1       | .                  | .                  | .                  | .      |
| .                  | Vv04g1240          | Tc01_g002250       | .                  | Gorai. |
| 008G064900.1       | .                  | Gorai.003G011500.1 | .                  | .      |
| Vv18g1192          | .                  | Gorai.002G125300.1 | .                  | .      |
| .                  | .                  | .                  | .                  | .      |
| .                  | Vv04g1241          | Tc01_g002240       | .                  | Gorai. |
| 007G198000.1       | .                  | .                  | .                  | .      |
| Vv18g1193          | Tc08_g002960       | .                  | .                  | .      |
| .                  | .                  | .                  | .                  | .      |
| .                  | .                  | .                  | .                  | .      |
| Vv18g1194          | Tc08_g002970       | .                  | .                  | .      |
| Gorai.010G006700.1 | .                  | .                  | .                  | .      |
| .                  | .                  | .                  | .                  | .      |
| Vv18g1195          | Tc08_g002980       | .                  | Gorai.005G110700.1 | .      |
| Gorai.009G197000.1 | .                  | Gorai.010G006600.1 | Vv03g0025          | .      |
| .                  | Tc02_g007440       | Gorai.013G033400.1 | Gorai.             | .      |
| 002G004700.1       | .                  | Gorai.012G154400.1 | Vv04g1263          | .      |
| Tc01_g002070       | .                  | Gorai.008G064100.1 | Gorai.007G196900.1 | .      |
| .                  | Gorai.003G011200.1 | Gorai.011G099600.1 | .                  | .      |
| Vv18g1196          | .                  | .                  | .                  | .      |
| Vv03g0034          | Tc02_g007310       | .                  | Gorai.005G247800.1 | .      |
| Gorai.002G004300.1 | .                  | .                  | .                  | .      |
| .                  | .                  | .                  | .                  | .      |
| Vv18g1197          | .                  | .                  | .                  | .      |
| .                  | .                  | .                  | .                  | .      |
| .                  | .                  | .                  | .                  | .      |
| Vv18g1198          | .                  | .                  | .                  | .      |
| .                  | .                  | .                  | .                  | .      |

|                    |                    |                    |                    |   |
|--------------------|--------------------|--------------------|--------------------|---|
| Vv18g1199          | Tc08_g003020       | Gorai.002G125100.1 | .                  | . |
| Gorai.009G196800.1 | .                  | .                  | .                  | . |
| .                  | .                  | .                  | .                  | . |
| Vv18g1200          | .                  | .                  | .                  | . |
| .                  | .                  | .                  | .                  | . |
| Vv18g1201          | .                  | .                  | .                  | . |
| Tc01_g002040       | .                  | Gorai.008G063800.1 | Vv04g1265          | . |
| 007G196800.1       | .                  | .                  | Gorai.             | . |
| Vv18g1202          | Tc08_g003030       | .                  | Gorai.009G196700.1 | . |
| .                  | Gorai.010G006400.1 | Vv03g0052          | .                  | . |
| Tc02_g006380       | Gorai.005G248400.1 | Gorai.002G004600.1 | .                  | . |
| .                  | Gorai.012G154300.1 | .                  | .                  | . |
| .                  | .                  | .                  | .                  | . |
| Vv18g1203          | Tc08_g003050       | .                  | Gorai.             | . |
| 009G271000.1       | Gorai.010G006200.1 | .                  | .                  | . |
| .                  | .                  | .                  | .                  | . |
| .                  | .                  | .                  | .                  | . |
| Vv18g1204          | Tc08_g003060       | .                  | Gorai.009G196500.1 | . |
| Gorai.009G270900.1 | .                  | .                  | .                  | . |
| .                  | .                  | .                  | .                  | . |
| .                  | .                  | .                  | .                  | . |
| Vv18g1205          | .                  | .                  | .                  | . |
| .                  | .                  | .                  | .                  | . |
| .                  | .                  | .                  | .                  | . |
| Vv18g1206          | Tc08_g003070       | .                  | .                  | . |
| Gorai.010G006100.1 | Vv03g0060          | Tc02_g006320       | .                  | . |
| Gorai.005G248800.1 | Gorai.002G004000.1 | .                  | Gorai.             | . |
| 012G154000.1       | .                  | .                  | .                  | . |
| Vv18g1207          | Tc08_g003080       | Gorai.005G110900.1 | .                  | . |
| .                  | .                  | .                  | .                  | . |
| .                  | .                  | .                  | .                  | . |
| Vv18g1208          | .                  | .                  | .                  | . |
| .                  | .                  | .                  | .                  | . |
| .                  | .                  | .                  | .                  | . |
| Vv18g1209          | Tc08_g003090       | .                  | .                  | . |
| Gorai.010G006000.1 | .                  | .                  | .                  | . |
| .                  | .                  | .                  | .                  | . |
| .                  | .                  | .                  | .                  | . |
| Vv18g1210          | Tc08_g003110       | Gorai.002G125000.1 | .                  | . |
| Gorai.009G196400.1 | Gorai.009G270800.1 | .                  | .                  | . |
| .                  | .                  | .                  | .                  | . |
| .                  | .                  | .                  | .                  | . |
| Vv18g1211          | .                  | .                  | .                  | . |
| .                  | .                  | .                  | .                  | . |
| .                  | .                  | .                  | .                  | . |
| Vv18g1212          | .                  | Gorai.005G111200.1 | .                  | . |
| .                  | .                  | .                  | .                  | . |



|              |                    |                    |   |                    |        |   |
|--------------|--------------------|--------------------|---|--------------------|--------|---|
|              | Vv04g1273          | Tc01_g001970       | . | .                  | .      | . |
| Vv18g1213    | Tc08_g003130       | .                  | . | .                  | .      | . |
| .            | .                  | .                  | . | .                  | .      | . |
| Vv18g1214    | Tc08_g003140       | Gorai.002G124900.1 | . | .                  | .      | . |
| .            | .                  | .                  | . | .                  | .      | . |
| Vv18g1215    | .                  | .                  | . | .                  | .      | . |
| .            | .                  | .                  | . | .                  | .      | . |
| Vv18g1216    | .                  | .                  | . | .                  | .      | . |
| .            | .                  | .                  | . | .                  | .      | . |
| Vv18g1217    | Tc08_g003160       | .                  | . | .                  | .      | . |
| Vv03g0064    | Tc02_g006270       | .                  | . | Gorai.005G248900.1 | .      | . |
| .            | .                  | .                  | . | .                  | .      | . |
| Vv18g1218    | Tc08_g003170       | .                  | . | .                  | Gorai. | . |
| 009G270600.1 | Gorai.010G005900.1 | .                  | . | .                  | .      | . |
| .            | .                  | .                  | . | .                  | .      | . |
| Vv18g1219    | .                  | .                  | . | .                  | .      | . |
| .            | .                  | .                  | . | .                  | .      | . |
| Vv18g1220    | Tc08_g003180       | .                  | . | .                  | .      | . |
| .            | .                  | .                  | . | .                  | .      | . |
| Vv18g1221    | Tc08_g003190       | .                  | . | .                  | .      | . |
| .            | .                  | .                  | . | .                  | .      | . |
| Vv18g1222    | Tc08_g003200       | .                  | . | .                  | .      | . |
| .            | .                  | .                  | . | .                  | .      | . |
| Vv18g1223    | Tc08_g003220       | .                  | . | .                  | .      | . |
| .            | .                  | .                  | . | .                  | .      | . |
| Vv18g1224    | Tc08_g003250       | .                  | . | .                  | .      | . |
| .            | .                  | .                  | . | .                  | .      | . |
| Vv18g1225    | Tc08_g003270       | .                  | . | .                  | .      | . |
| .            | .                  | .                  | . | .                  | .      | . |
| Vv18g1226    | .                  | .                  | . | .                  | .      | . |
| .            | .                  | .                  | . | .                  | .      | . |
| Vv18g1227    | .                  | .                  | . | .                  | .      | . |
| .            | .                  | .                  | . | .                  | .      | . |
| Vv18g1228    | Tc08_g003290       | .                  | . | Gorai.009G196300.1 | .      | . |

|                    |                    |                    |           |   |   |   |   |
|--------------------|--------------------|--------------------|-----------|---|---|---|---|
| .                  | .                  | .                  | .         | . | . | . | . |
| .                  | .                  | .                  | .         | . | . | . | . |
| Vv18g1229          | .                  | .                  | .         | . | . | . | . |
| .                  | .                  | .                  | .         | . | . | . | . |
| .                  | .                  | .                  | .         | . | . | . | . |
| Vv18g1230          | .                  | .                  | .         | . | . | . | . |
| .                  | .                  | .                  | .         | . | . | . | . |
| .                  | .                  | .                  | .         | . | . | . | . |
| Vv18g1231          | .                  | .                  | .         | . | . | . | . |
| .                  | .                  | .                  | .         | . | . | . | . |
| .                  | .                  | .                  | .         | . | . | . | . |
| Vv18g1232          | Tc08_g003310       | Gorai.002G124800.1 | .         | . | . | . | . |
| Gorai.009G196200.1 | .                  | Gorai.010G005800.1 | .         | . | . | . | . |
| .                  | .                  | .                  | .         | . | . | . | . |
| .                  | .                  | .                  | .         | . | . | . | . |
| Vv18g1233          | Tc08_g003320       | Gorai.002G124700.1 | Gorai.    | . | . | . | . |
| 005G111400.1       | .                  | Gorai.010G005700.1 | .         | . | . | . | . |
| .                  | .                  | .                  | Vv04g1281 | . | . | . | . |
| Tc01_g001920       | .                  | Gorai.007G196000.1 | .         | . | . | . | . |
| Vv18g1234          | Tc08_g003330       | Gorai.005G111500.1 | .         | . | . | . | . |
| .                  | .                  | .                  | .         | . | . | . | . |
| .                  | .                  | .                  | .         | . | . | . | . |
| Vv18g1235          | Tc08_g003340       | Gorai.002G124600.1 | .         | . | . | . | . |
| .                  | .                  | .                  | .         | . | . | . | . |
| .                  | .                  | .                  | .         | . | . | . | . |
| Vv18g1236          | .                  | .                  | .         | . | . | . | . |
| .                  | .                  | .                  | .         | . | . | . | . |
| .                  | .                  | .                  | .         | . | . | . | . |
| Vv18g1237          | Tc08_g003360       | Gorai.002G124500.1 | .         | . | . | . | . |
| .                  | Gorai.010G005600.1 | .                  | .         | . | . | . | . |
| .                  | .                  | .                  | .         | . | . | . | . |
| .                  | .                  | .                  | .         | . | . | . | . |
| Vv18g1238          | Tc08_g003370       | Gorai.002G124400.1 | .         | . | . | . | . |
| Gorai.009G196100.1 | .                  | .                  | .         | . | . | . | . |
| .                  | .                  | .                  | .         | . | . | . | . |
| .                  | .                  | .                  | .         | . | . | . | . |
| Vv18g1239          | .                  | .                  | .         | . | . | . | . |
| .                  | .                  | .                  | .         | . | . | . | . |
| .                  | .                  | .                  | .         | . | . | . | . |
| Vv18g1240          | Tc08_g003380       | Gorai.005G111600.1 | .         | . | . | . | . |
| .                  | .                  | .                  | .         | . | . | . | . |
| .                  | .                  | .                  | .         | . | . | . | . |
| Vv18g1241          | Gorai.002G124300.1 | Gorai.             | .         | . | . | . | . |
| 009G196000.1       | Gorai.009G270500.1 | Gorai.010G005500.1 | .         | . | . | . | . |
| .                  | .                  | .                  | .         | . | . | . | . |
| .                  | .                  | .                  | .         | . | . | . | . |
| Vv18g1242          | Tc08_g003390       | Gorai.002G124100.1 | .         | . | . | . | . |
| Gorai.009G195900.1 | .                  | Gorai.010G005400.1 | .         | . | . | . | . |
| .                  | .                  | .                  | .         | . | . | . | . |
| .                  | .                  | .                  | .         | . | . | . | . |
| Tc01_g001880       | Gorai.007G048300.1 | .                  | Vv04g1285 | . | . | . | . |

|                    |                    |                    |                    |                    |
|--------------------|--------------------|--------------------|--------------------|--------------------|
| Vv18g1243          | .                  | Gorai.002G124000.1 | .                  | Gorai.             |
| 009G195800.1       | Gorai.009G270400.1 |                    | Gorai.010G005300.1 | .                  |
| .                  | .                  | .                  | .                  | .                  |
| .                  | .                  | .                  | .                  | .                  |
| Vv18g1244          | .                  | .                  | .                  | .                  |
| .                  | .                  | .                  | .                  | .                  |
| .                  | .                  | .                  | .                  | .                  |
| Vv18g1245          | Tc08_g003400       | .                  | .                  | .                  |
| .                  | .                  | .                  | .                  | .                  |
| .                  | .                  | .                  | .                  | .                  |
| Vv18g1246          | Tc08_g003410       | .                  | .                  | Gorai.009G195700.1 |
| .                  | .                  | .                  | .                  | .                  |
| .                  | .                  | .                  | .                  | .                  |
| Vv18g1247          | .                  | .                  | .                  | .                  |
| .                  | .                  | .                  | .                  | .                  |
| .                  | .                  | .                  | .                  | .                  |
| Vv18g1248          | .                  | .                  | .                  | .                  |
| Vv03g0074          | .                  | .                  | .                  | .                  |
| .                  | .                  | .                  | .                  | .                  |
| Vv18g1249          | .                  | .                  | Gorai.009G195600.1 | .                  |
| Gorai.009G270300.1 | .                  | .                  | .                  | .                  |
| .                  | .                  | .                  | .                  | .                  |
| .                  | .                  | .                  | .                  | .                  |
| Vv18g1250          | Tc08_g003430       | Gorai.002G123800.1 | .                  | .                  |
| Gorai.009G195500.1 | .                  | .                  | .                  | .                  |
| .                  | .                  | .                  | .                  | .                  |
| .                  | .                  | .                  | .                  | .                  |
| Vv18g1251          | .                  | .                  | .                  | .                  |
| .                  | .                  | .                  | .                  | .                  |
| .                  | .                  | .                  | .                  | .                  |
| Vv18g1252          | Tc08_g003440       | Gorai.002G123700.1 | .                  | .                  |
| Gorai.009G195400.1 | .                  | Gorai.010G005200.1 | .                  | .                  |
| .                  | .                  | .                  | Vv04g1290          | .                  |
| .                  | Gorai.007G195700.1 | .                  | .                  | .                  |
| Vv18g1253          | .                  | .                  | .                  | .                  |
| .                  | .                  | .                  | .                  | .                  |
| .                  | .                  | .                  | .                  | .                  |
| Vv18g1254          | .                  | .                  | .                  | .                  |
| .                  | .                  | .                  | .                  | .                  |
| .                  | .                  | .                  | .                  | .                  |
| Vv18g1255          | .                  | .                  | .                  | .                  |
| .                  | .                  | .                  | .                  | .                  |
| .                  | .                  | .                  | .                  | .                  |
| Vv18g1256          | Tc08_g003470       | .                  | .                  | .                  |
| Vv03g0106          | .                  | .                  | .                  | .                  |
| .                  | .                  | .                  | .                  | .                  |
| Vv18g1257          | .                  | .                  | .                  | .                  |
| .                  | .                  | .                  | .                  | .                  |
| .                  | .                  | .                  | .                  | .                  |
| Vv18g1258          | .                  | .                  | .                  | .                  |

|                    |                    |                    |           |   |                    |   |   |
|--------------------|--------------------|--------------------|-----------|---|--------------------|---|---|
| .                  | .                  | .                  | .         | . | .                  | . | . |
| .                  | .                  | .                  | .         | . | .                  | . | . |
| Vv18g1259          | .                  | .                  | .         | . | .                  | . | . |
| .                  | .                  | .                  | .         | . | .                  | . | . |
| Vv18g1260          | .                  | .                  | .         | . | Gorai.009G195300.1 | . | . |
| Gorai.010G005100.1 | .                  | .                  | Vv03g0107 | . | .                  | . | . |
| .                  | .                  | .                  | .         | . | .                  | . | . |
| .                  | .                  | .                  | .         | . | .                  | . | . |
| Vv18g1261          | .                  | .                  | .         | . | .                  | . | . |
| .                  | .                  | .                  | .         | . | .                  | . | . |
| Vv18g1262          | .                  | .                  | .         | . | .                  | . | . |
| .                  | .                  | .                  | .         | . | .                  | . | . |
| Vv18g1263          | Tc08_g003490       | .                  | .         | . | Gorai.009G195100.1 | . | . |
| .                  | .                  | .                  | .         | . | .                  | . | . |
| .                  | .                  | .                  | .         | . | .                  | . | . |
| Vv18g1264          | Tc08_g003500       | Gorai.002G123600.1 | .         | . | .                  | . | . |
| Gorai.009G195000.1 | .                  | .                  | .         | . | .                  | . | . |
| .                  | .                  | .                  | .         | . | .                  | . | . |
| Vv18g1265          | .                  | .                  | .         | . | .                  | . | . |
| .                  | .                  | .                  | .         | . | .                  | . | . |
| Vv18g1266          | .                  | .                  | .         | . | .                  | . | . |
| .                  | .                  | .                  | .         | . | .                  | . | . |
| Vv18g1267          | .                  | .                  | .         | . | .                  | . | . |
| .                  | .                  | .                  | .         | . | .                  | . | . |
| Vv18g1268          | .                  | .                  | .         | . | .                  | . | . |
| .                  | .                  | .                  | .         | . | .                  | . | . |
| .                  | .                  | .                  | .         | . | .                  | . | . |
| Vv18g1269          | Tc08_g003520       | .                  | .         | . | Gorai.             | . | . |
| 009G270100.1       | Gorai.010G004800.1 | .                  | .         | . | .                  | . | . |
| .                  | .                  | Vv04g1298          | .         | . | Tc01_g001750       | . | . |
| .                  | Gorai.007G195200.1 | Gorai.003G009800.1 | .         | . | .                  | . | . |
| Vv18g1270          | Tc08_g003530       | .                  | .         | . | .                  | . | . |
| Gorai.010G004700.1 | .                  | .                  | .         | . | .                  | . | . |
| .                  | .                  | .                  | .         | . | .                  | . | . |
| Vv18g1271          | .                  | .                  | .         | . | .                  | . | . |
| .                  | .                  | .                  | .         | . | .                  | . | . |
| .                  | .                  | .                  | .         | . | .                  | . | . |
| Vv18g1272          | Tc08_g003540       | .                  | .         | . | .                  | . | . |
| Gorai.010G004600.1 | .                  | .                  | .         | . | .                  | . | . |
| .                  | Vv04g1299          | .                  | .         | . | .                  | . | . |
| .                  | .                  | .                  | .         | . | .                  | . | . |
| Vv18g1273          | .                  | .                  | .         | . | .                  | . | . |
| .                  | .                  | .                  | .         | . | .                  | . | . |

|                    |                    |                    |                    |                    |
|--------------------|--------------------|--------------------|--------------------|--------------------|
| Vv18g1274          | Tc08_g003570       | .                  | .                  | Gorai.009G194700.1 |
| .                  | Gorai.010G004400.1 | .                  | .                  | .                  |
| .                  | .                  | .                  | .                  | .                  |
| Vv18g1275          | Tc08_g003580       | .                  | .                  | .                  |
| Gorai.010G004300.1 | Vv03g0115          | Tc02_g005630       | Gorai.             | .                  |
| 002G192600.1       | Gorai.005G252000.1 | .                  | Gorai.008G033400.1 | .                  |
| .                  | .                  | .                  | .                  | .                  |
| Vv18g1276          | Tc08_g003590       | Gorai.002G123500.1 | .                  | .                  |
| .                  | Vv03g0116          | Tc02_g005620       | .                  | .                  |
| Gorai.005G252100.1 | .                  | .                  | .                  | .                  |
| .                  | .                  | .                  | .                  | .                  |
| Vv18g1277          | Tc08_g003600       | .                  | .                  | Gorai.009G194600.1 |
| Gorai.009G270000.1 | .                  | .                  | .                  | .                  |
| .                  | .                  | .                  | .                  | .                  |
| Vv18g1278          | .                  | .                  | .                  | .                  |
| .                  | .                  | .                  | .                  | .                  |
| .                  | .                  | .                  | .                  | .                  |
| Vv18g1279          | Tc08_g003610       | .                  | .                  | .                  |
| Gorai.010G004200.1 | .                  | .                  | .                  | .                  |
| .                  | .                  | .                  | .                  | .                  |
| Vv18g1280          | Tc08_g003620       | .                  | .                  | Gorai.             |
| 009G269900.1       | .                  | .                  | .                  | .                  |
| .                  | .                  | .                  | .                  | .                  |
| Vv18g1281          | .                  | .                  | .                  | .                  |
| .                  | .                  | .                  | .                  | .                  |
| .                  | .                  | .                  | .                  | .                  |
| Vv18g1282          | Tc08_g003640       | Gorai.002G123400.1 | .                  | .                  |
| Gorai.009G194500.1 | Gorai.009G269800.1 | Gorai.010G003800.1 | .                  | .                  |
| .                  | .                  | .                  | .                  | .                  |
| Vv18g1283          | Tc08_g003650       | Gorai.002G123300.1 | .                  | .                  |
| .                  | .                  | .                  | .                  | .                  |
| .                  | .                  | .                  | .                  | .                  |
| Vv18g1284          | .                  | .                  | .                  | .                  |
| .                  | .                  | .                  | .                  | .                  |
| .                  | .                  | .                  | .                  | .                  |
| Vv18g1285          | .                  | .                  | .                  | .                  |
| Vv03g0156          | Tc02_g005490       | Gorai.002G193600.1 | .                  | .                  |
| Gorai.002G003800.1 | Gorai.008G034100.1 | .                  | .                  | .                  |
| .                  | .                  | .                  | .                  | .                  |
| Vv18g1286          | .                  | .                  | .                  | .                  |
| .                  | .                  | .                  | .                  | .                  |
| .                  | .                  | .                  | .                  | .                  |
| Vv18g1287          | Tc08_g003660       | Gorai.005G111800.1 | .                  | .                  |
| Gorai.009G194400.1 | .                  | Gorai.010G003300.1 | .                  | .                  |
| .                  | .                  | .                  | .                  | .                  |
| .                  | .                  | .                  | .                  | .                  |

|                    |                    |                    |                    |        |
|--------------------|--------------------|--------------------|--------------------|--------|
| Vv18g1288          | Tc08_g003690       | Gorai.002G123200.1 | .                  | .      |
| .                  | .                  | .                  | .                  | .      |
| Vv18g1289          | .                  | .                  | .                  | .      |
| .                  | .                  | .                  | .                  | .      |
| Vv18g1290          | .                  | .                  | .                  | .      |
| .                  | .                  | .                  | .                  | .      |
| Vv18g1291          | .                  | Gorai.009G194200.1 | .                  | .      |
| .                  | Vv04g1312          | Tc01_g001610       | .                  | Gorai. |
| 008G062600.1       | Gorai.007G193800.1 | .                  | .                  | .      |
| .                  | .                  | .                  | .                  | .      |
| Vv18g1292          | Tc08_g003720       | Gorai.002G123100.1 | .                  | .      |
| .                  | .                  | .                  | .                  | .      |
| Vv18g1293          | .                  | .                  | .                  | .      |
| .                  | .                  | .                  | .                  | .      |
| Vv18g1294          | Tc08_g003730       | Gorai.002G122900.1 | Gorai.             | .      |
| 005G112000.1       | Gorai.009G194100.1 | .                  | Gorai.010G003100.1 | .      |
| .                  | Vv04g1314          | Tc01_g001590       | Gorai.007G048900.1 | .      |
| Gorai.008G062300.1 | Gorai.007G193600.1 | Gorai.003G009200.1 | .                  | .      |
| .                  | .                  | .                  | .                  | .      |
| Vv18g1295          | Tc08_g003740       | .                  | Gorai.009G194000.1 | .      |
| .                  | Vv04g1315          | Tc01_g001580       | .                  | .      |
| Gorai.007G193400.1 | .                  | .                  | .                  | .      |
| .                  | .                  | .                  | .                  | .      |
| Vv18g1296          | Tc08_g003750       | Gorai.002G122800.1 | .                  | .      |
| .                  | Gorai.010G003000.1 | .                  | .                  | .      |
| .                  | .                  | .                  | .                  | .      |
| Vv18g1297          | .                  | .                  | .                  | .      |
| .                  | .                  | .                  | .                  | .      |
| Vv18g1298          | .                  | .                  | .                  | .      |
| .                  | .                  | .                  | .                  | .      |
| Vv18g1299          | .                  | .                  | .                  | .      |
| .                  | .                  | .                  | .                  | .      |
| Vv18g1300          | .                  | .                  | .                  | .      |
| .                  | .                  | .                  | .                  | .      |
| Vv18g1301          | Tc08_g003770       | .                  | Gorai.009G193900.1 | .      |
| .                  | .                  | .                  | .                  | .      |
| Vv18g1302          | .                  | .                  | .                  | .      |
| .                  | .                  | .                  | .                  | .      |
| .                  | .                  | .                  | .                  | .      |

|                    |                    |                    |                    |                    |   |   |   |
|--------------------|--------------------|--------------------|--------------------|--------------------|---|---|---|
| Vv18g1303          | .                  | .                  | .                  | .                  | . | . | . |
| .                  | .                  | .                  | .                  | .                  | . | . | . |
| Vv18g1304          | Tc08_g003800       | .                  | .                  | Gorai.009G193700.1 | . | . | . |
| .                  | .                  | .                  | .                  | .                  | . | . | . |
| Vv18g1305          | .                  | .                  | Gorai.005G112200.1 | .                  | . | . | . |
| .                  | .                  | .                  | .                  | .                  | . | . | . |
| Vv18g1306          | .                  | .                  | .                  | .                  | . | . | . |
| .                  | .                  | .                  | .                  | .                  | . | . | . |
| Vv18g1307          | Tc08_g003840       | .                  | .                  | Gorai.009G193600.1 | . | . | . |
| Gorai.009G269700.1 | .                  | .                  | .                  | .                  | . | . | . |
| .                  | .                  | .                  | .                  | .                  | . | . | . |
| Vv18g1308          | .                  | .                  | .                  | .                  | . | . | . |
| .                  | .                  | .                  | .                  | .                  | . | . | . |
| Vv18g1309          | Tc08_g003850       | .                  | .                  | Gorai.009G193500.1 | . | . | . |
| .                  | .                  | .                  | .                  | .                  | . | . | . |
| Vv18g1310          | .                  | .                  | .                  | .                  | . | . | . |
| .                  | .                  | .                  | .                  | .                  | . | . | . |
| Vv18g1311          | Tc08_g003880       | .                  | .                  | .                  | . | . | . |
| Gorai.010G002700.1 | .                  | .                  | .                  | .                  | . | . | . |
| .                  | .                  | .                  | .                  | .                  | . | . | . |
| Vv18g1312          | Tc08_g003890       | .                  | Gorai.005G112500.1 | .                  | . | . | . |
| Gorai.009G193300.1 | Gorai.009G269600.1 | Gorai.010G002600.1 | .                  | .                  | . | . | . |
| Vv03g0204          | Tc02_g005020       | Gorai.002G197500.1 | .                  | .                  | . | . | . |
| .                  | Gorai.008G036100.1 | Vv04g1352          | .                  | .                  | . | . | . |
| Tc01_g001350       | .                  | Gorai.007G192300.1 | Gorai.             | .                  | . | . | . |
| 003G008000.1       | .                  | .                  | .                  | .                  | . | . | . |
| Vv18g1313          | Tc08_g003910       | Gorai.002G122600.1 | .                  | .                  | . | . | . |
| Gorai.009G193200.1 | .                  | .                  | .                  | .                  | . | . | . |
| .                  | .                  | Vv04g1353          | Tc01_g001330       | .                  | . | . | . |
| Gorai.007G049400.1 | .                  | .                  | .                  | .                  | . | . | . |
| Vv18g1314          | .                  | .                  | .                  | .                  | . | . | . |
| .                  | .                  | .                  | .                  | .                  | . | . | . |
| Vv18g1315          | Tc08_g003920       | Gorai.002G122500.1 | .                  | .                  | . | . | . |
| .                  | .                  | .                  | .                  | .                  | . | . | . |
| Vv18g1316          | .                  | .                  | .                  | .                  | . | . | . |
| .                  | .                  | .                  | .                  | .                  | . | . | . |
| Vv18g1317          | .                  | .                  | .                  | .                  | . | . | . |
| .                  | .                  | .                  | .                  | .                  | . | . | . |
| .                  | .                  | .                  | .                  | .                  | . | . | . |

|                    |                    |                    |                    |                    |
|--------------------|--------------------|--------------------|--------------------|--------------------|
| Vv18g1318          | Tc08_g003940       | .                  | .                  | Gorai.009G193000.1 |
| .                  | .                  | .                  | .                  | .                  |
| .                  | .                  | .                  | .                  | .                  |
| Vv18g1319          | Tc08_g003950       | Gorai.002G122300.1 | Gorai.             |                    |
| 005G112600.1       | Gorai.009G192800.1 | Gorai.009G269400.1 |                    |                    |
| Gorai.010G002400.1 | Vv03g0210          | Tc02_g004940       | Gorai.             |                    |
| 002G198200.1       | Gorai.005G254300.1 | Gorai.002G002800.1 | .                  |                    |
| .                  | .                  | .                  | .                  | .                  |
| Vv18g1320          | .                  | .                  | .                  | .                  |
| .                  | .                  | .                  | .                  | .                  |
| .                  | .                  | .                  | .                  | .                  |
| Vv18g1321          | .                  | .                  | .                  | .                  |
| .                  | .                  | .                  | .                  | .                  |
| .                  | .                  | .                  | .                  | .                  |
| Vv18g1322          | .                  | .                  | .                  | .                  |
| .                  | .                  | .                  | .                  | .                  |
| .                  | .                  | .                  | .                  | .                  |
| Vv18g1323          | .                  | .                  | .                  | .                  |
| .                  | .                  | .                  | .                  | .                  |
| .                  | .                  | .                  | .                  | .                  |
| Vv18g1324          | .                  | .                  | .                  | .                  |
| .                  | .                  | .                  | .                  | .                  |
| .                  | .                  | .                  | .                  | .                  |
| Vv18g1325          | .                  | .                  | .                  | .                  |
| .                  | .                  | .                  | .                  | .                  |
| .                  | .                  | .                  | .                  | .                  |
| Vv18g1326          | .                  | .                  | .                  | .                  |
| .                  | .                  | .                  | .                  | .                  |
| .                  | .                  | .                  | .                  | .                  |
| Vv18g1327          | .                  | .                  | .                  | .                  |
| .                  | .                  | .                  | .                  | .                  |
| .                  | .                  | .                  | .                  | .                  |
| Vv18g1328          | .                  | .                  | .                  | .                  |
| .                  | .                  | .                  | .                  | .                  |
| .                  | .                  | .                  | .                  | .                  |
| Vv18g1329          | .                  | .                  | .                  | .                  |
| .                  | .                  | .                  | .                  | .                  |
| .                  | .                  | .                  | .                  | .                  |
| Vv18g1330          | Tc08_g003980       | .                  | Gorai.009G192700.1 |                    |
| .                  | Gorai.010G002200.1 | .                  | .                  | .                  |
| .                  | .                  | .                  | .                  | .                  |
| .                  | .                  | .                  | .                  | .                  |
| Vv18g1331          | .                  | .                  | .                  | .                  |
| .                  | .                  | .                  | .                  | .                  |
| .                  | .                  | .                  | .                  | .                  |
| Vv18g1332          | .                  | .                  | .                  | .                  |
| Vv03g0212          | Gorai.002G198400.1 | .                  | .                  | .                  |
| .                  | .                  | .                  | .                  | .                  |
| Vv18g1333          | .                  | .                  | .                  | .                  |
| .                  | .                  | .                  | .                  | .                  |



|                    |                    |                    |              |                    |                    |   |   |
|--------------------|--------------------|--------------------|--------------|--------------------|--------------------|---|---|
| Vv18g1334          | .                  | .                  | .            | .                  | Gorai.009G266600.1 | . | . |
| .                  | .                  | .                  | .            | .                  | .                  | . | . |
| Vv18g1335          | Tc08_g003990       | .                  | .            | .                  | .                  | . | . |
| Gorai.010G002100.1 | Vv03g0214          | .                  | .            | .                  | .                  | . | . |
| .                  | .                  | .                  | .            | .                  | .                  | . | . |
| Vv18g1336          | Tc08_g004000       | .                  | .            | .                  | Gorai.009G192600.1 | . | . |
| .                  | Gorai.010G002000.1 | .                  | .            | .                  | .                  | . | . |
| .                  | .                  | .                  | .            | .                  | .                  | . | . |
| Vv18g1337          | .                  | .                  | .            | .                  | .                  | . | . |
| .                  | .                  | .                  | .            | .                  | .                  | . | . |
| Vv18g1338          | .                  | .                  | .            | .                  | .                  | . | . |
| .                  | .                  | .                  | .            | .                  | .                  | . | . |
| Vv18g1339          | Tc08_g004010       | Gorai.002G122200.1 | .            | .                  | .                  | . | . |
| Gorai.009G192500.1 | .                  | .                  | .            | .                  | .                  | . | . |
| .                  | .                  | Vv04g1359          | Tc01_g001240 | .                  | .                  | . | . |
| .                  | Gorai.007G191800.1 | Gorai.003G007000.1 | .            | .                  | .                  | . | . |
| Vv18g1340          | Tc08_g004020       | Gorai.002G121900.1 | .            | .                  | .                  | . | . |
| .                  | .                  | .                  | .            | .                  | .                  | . | . |
| .                  | Vv04g1360          | Tc01_g001230       | .            | .                  | .                  | . | . |
| Gorai.007G191700.1 | Gorai.003G006800.1 | .                  | .            | .                  | .                  | . | . |
| Vv18g1341          | Tc08_g004030       | .                  | .            | Gorai.009G192400.1 | .                  | . | . |
| .                  | .                  | .                  | .            | .                  | .                  | . | . |
| .                  | .                  | .                  | .            | .                  | .                  | . | . |
| Vv18g1342          | Tc08_g004040       | Gorai.002G121800.1 | .            | .                  | .                  | . | . |
| Gorai.009G192300.1 | .                  | .                  | .            | .                  | .                  | . | . |
| .                  | .                  | .                  | .            | .                  | .                  | . | . |
| Vv18g1343          | Tc08_g004050       | Gorai.002G121700.1 | .            | .                  | .                  | . | . |
| .                  | .                  | .                  | .            | .                  | .                  | . | . |
| .                  | .                  | .                  | .            | .                  | .                  | . | . |
| Vv18g1344          | Tc08_g004130       | .                  | .            | .                  | .                  | . | . |
| .                  | .                  | .                  | .            | .                  | .                  | . | . |
| .                  | .                  | .                  | .            | .                  | .                  | . | . |
| Vv18g1345          | .                  | Gorai.005G085300.1 | Gorai.       | .                  | .                  | . | . |
| 009G250800.1       | Gorai.009G250800.1 | .                  | .            | .                  | .                  | . | . |
| .                  | .                  | .                  | .            | .                  | .                  | . | . |
| Vv18g1346          | .                  | .                  | .            | .                  | .                  | . | . |
| .                  | .                  | .                  | .            | .                  | .                  | . | . |
| .                  | .                  | .                  | .            | .                  | .                  | . | . |
| Vv18g1347          | .                  | .                  | .            | .                  | .                  | . | . |
| .                  | .                  | .                  | .            | .                  | .                  | . | . |
| .                  | .                  | .                  | .            | .                  | .                  | . | . |
| Vv18g1348          | .                  | Gorai.005G085000.1 | Gorai.       | .                  | .                  | . | . |

|                    |                    |                    |                    |                    |   |
|--------------------|--------------------|--------------------|--------------------|--------------------|---|
| 009G251000.1       | Gorai.009G251000.1 | .                  | .                  | .                  | . |
| .                  | .                  | .                  | Vv04g1570          | .                  | . |
| Tc01_g012050       | .                  | .                  | .                  | .                  | . |
| Vv18g1349          | .                  | .                  | Gorai.005G084900.1 | .                  | . |
| .                  | .                  | .                  | .                  | .                  | . |
| Vv18g1350          | .                  | .                  | .                  | .                  | . |
| .                  | .                  | .                  | .                  | .                  | . |
| Vv18g1351          | Tc08_g001420       | .                  | .                  | .                  | . |
| .                  | .                  | .                  | .                  | .                  | . |
| Vv18g1352          | .                  | Gorai.002G119100.1 | .                  | Gorai.005G084700.1 | . |
| .                  | Gorai.009G251200.1 | Gorai.009G251200.1 | .                  | .                  | . |
| .                  | .                  | .                  | .                  | .                  | . |
| Vv18g1353          | .                  | .                  | .                  | .                  | . |
| .                  | .                  | .                  | .                  | .                  | . |
| Vv18g1354          | .                  | .                  | Gorai.005G084600.1 | Gorai.             | . |
| 009G251400.1       | Gorai.009G251400.1 | .                  | Gorai.010G000800.1 | .                  | . |
| .                  | .                  | .                  | .                  | .                  | . |
| Vv18g1355          | .                  | .                  | .                  | .                  | . |
| .                  | .                  | .                  | .                  | .                  | . |
| Vv18g1356          | Tc08_g005510       | .                  | .                  | .                  | . |
| .                  | .                  | .                  | .                  | .                  | . |
| Vv18g1357          | .                  | .                  | Gorai.005G084500.1 | .                  | . |
| .                  | .                  | .                  | .                  | .                  | . |
| Vv18g1358          | .                  | .                  | .                  | .                  | . |
| .                  | .                  | .                  | .                  | .                  | . |
| Vv18g1359          | Tc08_g005220       | .                  | .                  | .                  | . |
| .                  | Vv03g0234          | Tc02_g004640       | Gorai.002G199700.1 | .                  | . |
| Gorai.005G255000.1 | .                  | .                  | Gorai.008G037200.1 | Gorai.             | . |
| 012G156600.1       | .                  | .                  | .                  | .                  | . |
| Vv18g1360          | Tc08_g004870       | .                  | .                  | .                  | . |
| .                  | .                  | .                  | .                  | .                  | . |
| Vv18g1361          | .                  | .                  | .                  | .                  | . |
| .                  | .                  | .                  | .                  | .                  | . |
| Vv18g1362          | .                  | .                  | .                  | .                  | . |
| .                  | .                  | .                  | .                  | .                  | . |
| Vv18g1363          | .                  | .                  | .                  | .                  | . |
| .                  | .                  | .                  | .                  | .                  | . |

|                    |           |   |   |              |                    |   |   |
|--------------------|-----------|---|---|--------------|--------------------|---|---|
| Vv18g1364          | .         | . | . | .            | .                  | . | . |
| .                  | .         | . | . | .            | .                  | . | . |
| Vv18g1365          | .         | . | . | .            | .                  | . | . |
| .                  | .         | . | . | .            | .                  | . | . |
| Vv18g1366          | .         | . | . | .            | .                  | . | . |
| .                  | .         | . | . | .            | .                  | . | . |
| Vv18g1367          | .         | . | . | .            | .                  | . | . |
| .                  | .         | . | . | .            | .                  | . | . |
| Vv18g1368          | .         | . | . | .            | .                  | . | . |
| .                  | .         | . | . | .            | .                  | . | . |
| Vv18g1369          | .         | . | . | .            | Gorai.009G251500.1 | . | . |
| Gorai.009G251500.1 | .         | . | . | .            | .                  | . | . |
| .                  | .         | . | . | .            | .                  | . | . |
| Vv18g1370          | .         | . | . | .            | .                  | . | . |
| .                  | .         | . | . | .            | .                  | . | . |
| Vv18g1371          | .         | . | . | .            | .                  | . | . |
| .                  | .         | . | . | .            | .                  | . | . |
| Vv18g1372          | .         | . | . | .            | .                  | . | . |
| .                  | .         | . | . | .            | .                  | . | . |
| Vv18g1373          | .         | . | . | .            | .                  | . | . |
| .                  | .         | . | . | .            | .                  | . | . |
| Vv18g1374          | .         | . | . | .            | .                  | . | . |
| .                  | .         | . | . | .            | .                  | . | . |
| Vv18g1375          | .         | . | . | .            | .                  | . | . |
| .                  | .         | . | . | .            | .                  | . | . |
| Vv18g1376          | .         | . | . | .            | Gorai.005G084100.1 | . | . |
| .                  | Vv04g1564 | . | . | Tc01_g011950 | .                  | . | . |
| .                  | .         | . | . | .            | .                  | . | . |
| Vv18g1377          | .         | . | . | .            | Gorai.009G251600.1 | . | . |
| Gorai.009G251600.1 | .         | . | . | .            | .                  | . | . |
| .                  | .         | . | . | .            | .                  | . | . |
| Vv18g1378          | .         | . | . | .            | .                  | . | . |
| .                  | .         | . | . | .            | .                  | . | . |
| Vv18g1379          | .         | . | . | .            | .                  | . | . |

|              |                    |              |                    |                    |   |   |
|--------------|--------------------|--------------|--------------------|--------------------|---|---|
| .            | .                  | .            | .                  | .                  | . | . |
| .            | .                  | .            | .                  | .                  | . | . |
| Vv18g1380    | .                  | .            | Gorai.005G084000.1 | .                  | . | . |
| .            | .                  | .            | .                  | .                  | . | . |
| .            | .                  | .            | .                  | .                  | . | . |
| Vv18g1381    | Tc08_g001040       | .            | .                  | Gorai.009G251700.1 | . | . |
|              | Gorai.009G251700.1 | .            | .                  | .                  | . | . |
| .            | .                  | .            | .                  | .                  | . | . |
| .            | .                  | .            | .                  | .                  | . | . |
| Vv18g1382    | .                  | .            | .                  | .                  | . | . |
| Vv04g1556    | Tc01_g038130       | .            | .                  | .                  | . | . |
| .            | .                  | .            | .                  | .                  | . | . |
| Vv18g1383    | .                  | .            | Gorai.005G083600.1 | .                  | . | . |
| .            | .                  | .            | .                  | .                  | . | . |
| .            | .                  | .            | .                  | .                  | . | . |
| Vv18g1384    | .                  | .            | Gorai.005G083500.1 | .                  | . | . |
| .            | .                  | .            | .                  | .                  | . | . |
| .            | .                  | .            | .                  | .                  | . | . |
| Vv18g1385    | .                  | .            | Gorai.005G083300.1 | Gorai.             | . | . |
| 009G251900.1 | Gorai.009G251900.1 | .            | .                  | .                  | . | . |
| .            | .                  | .            | .                  | .                  | . | . |
| .            | .                  | .            | .                  | .                  | . | . |
| Vv18g1386    | .                  | .            | Gorai.005G083200.1 | .                  | . | . |
| .            | Vv04g1545          | Tc01_g011750 | Gorai.007G065800.1 | .                  | . | . |
| .            | .                  | .            | .                  | .                  | . | . |
| .            | .                  | .            | .                  | .                  | . | . |
| Vv18g1387    | Tc08_g014600       | .            | .                  | .                  | . | . |
| .            | .                  | .            | .                  | .                  | . | . |
| .            | .                  | .            | .                  | .                  | . | . |
| Vv18g1388    | .                  | .            | .                  | .                  | . | . |
| .            | .                  | .            | .                  | .                  | . | . |
| .            | .                  | .            | .                  | .                  | . | . |
| Vv18g1389    | .                  | .            | Gorai.005G082800.1 | .                  | . | . |
| .            | .                  | .            | .                  | .                  | . | . |
| .            | .                  | .            | .                  | .                  | . | . |
| Vv18g1390    | .                  | .            | Gorai.005G082700.1 | .                  | . | . |
| .            | .                  | .            | .                  | .                  | . | . |
| .            | .                  | .            | .                  | .                  | . | . |
| Vv18g1391    | .                  | .            | .                  | .                  | . | . |
| .            | .                  | .            | .                  | .                  | . | . |
| .            | .                  | .            | .                  | .                  | . | . |
| Vv18g1392    | Tc08_g004060       | .            | .                  | .                  | . | . |
| .            | .                  | .            | .                  | .                  | . | . |
| .            | .                  | .            | .                  | .                  | . | . |
| Vv18g1393    | .                  | .            | Gorai.005G082600.1 | Gorai.             | . | . |
| 009G252200.1 | Gorai.009G252200.1 | .            | .                  | .                  | . | . |
| .            | .                  | .            | .                  | .                  | . | . |
| .            | .                  | .            | .                  | .                  | . | . |
| Vv18g1394    | Tc08_g004030       | .            | .                  | .                  | . | . |
|              | Vv04g1525          | Tc01_g011540 | .                  | .                  | . | . |

|                    |                    |                    |                    |   |   |
|--------------------|--------------------|--------------------|--------------------|---|---|
| Vv18g1395          | .                  | .                  | Gorai.005G082500.1 | . | . |
| .                  | .                  | .                  | .                  | . | . |
| Vv18g1396          | .                  | .                  | .                  | . | . |
| .                  | .                  | .                  | .                  | . | . |
| Vv18g1397          | .                  | .                  | Gorai.005G082400.1 | . | . |
| .                  | Vv04g1523          | .                  | .                  | . | . |
| Vv18g1398          | .                  | .                  | .                  | . | . |
| .                  | .                  | .                  | .                  | . | . |
| Vv18g1399          | .                  | .                  | .                  | . | . |
| .                  | .                  | .                  | .                  | . | . |
| Vv18g1400          | .                  | .                  | .                  | . | . |
| .                  | .                  | .                  | .                  | . | . |
| Vv18g1401          | .                  | .                  | .                  | . | . |
| .                  | .                  | .                  | .                  | . | . |
| Vv18g1402          | .                  | .                  | .                  | . | . |
| Vv04g1520          | Tc01_g011470       | .                  | .                  | . | . |
| .                  | .                  | .                  | .                  | . | . |
| Vv18g1403          | .                  | .                  | .                  | . | . |
| .                  | .                  | .                  | .                  | . | . |
| Vv18g1404          | .                  | .                  | .                  | . | . |
| .                  | .                  | .                  | .                  | . | . |
| Vv18g1405          | .                  | .                  | .                  | . | . |
| .                  | .                  | .                  | .                  | . | . |
| Vv18g1406          | .                  | .                  | Gorai.009G252400.1 | . | . |
| Gorai.009G252400.1 | .                  | .                  | .                  | . | . |
| .                  | .                  | .                  | .                  | . | . |
| Vv18g1407          | .                  | .                  | .                  | . | . |
| .                  | .                  | .                  | .                  | . | . |
| Vv18g1408          | .                  | .                  | .                  | . | . |
| .                  | .                  | .                  | .                  | . | . |
| Vv18g1409          | .                  | .                  | .                  | . | . |
| Vv04g1513          | Tc01_g011420       | Gorai.007G064800.1 | .                  | . | . |
| .                  | Gorai.011G116600.1 | .                  | .                  | . | . |
| .                  | .                  | .                  | .                  | . | . |
| Vv18g1410          | Tc08_g014730       | .                  | .                  | . | . |
| .                  | .                  | .                  | .                  | . | . |

|                    |                    |   |                    |                    |   |   |   |
|--------------------|--------------------|---|--------------------|--------------------|---|---|---|
| Vv18g1411          | .                  | . | .                  | .                  | . | . | . |
| Vv04g1511          | Tc01_g011390       | . | .                  | .                  | . | . | . |
| Vv18g1412          | Tc08_g003840       | . | .                  | .                  | . | . | . |
| .                  | .                  | . | .                  | .                  | . | . | . |
| Vv18g1413          | .                  | . | .                  | .                  | . | . | . |
| .                  | .                  | . | .                  | .                  | . | . | . |
| Vv18g1414          | .                  | . | .                  | Gorai.009G252500.1 | . | . | . |
| Gorai.009G252500.1 | .                  | . | .                  | .                  | . | . | . |
| .                  | .                  | . | .                  | .                  | . | . | . |
| Vv18g1415          | .                  | . | .                  | .                  | . | . | . |
| .                  | .                  | . | .                  | .                  | . | . | . |
| Vv18g1416          | .                  | . | .                  | .                  | . | . | . |
| .                  | .                  | . | .                  | .                  | . | . | . |
| Vv18g1417          | .                  | . | Gorai.005G081400.1 | .                  | . | . | . |
| .                  | .                  | . | .                  | .                  | . | . | . |
| Vv18g1418          | .                  | . | Gorai.005G081300.1 | .                  | . | . | . |
| .                  | .                  | . | .                  | .                  | . | . | . |
| Vv18g1419          | .                  | . | .                  | .                  | . | . | . |
| .                  | .                  | . | .                  | .                  | . | . | . |
| Vv18g1420          | Tc08_g003440       | . | .                  | .                  | . | . | . |
| .                  | .                  | . | .                  | .                  | . | . | . |
| Vv18g1421          | .                  | . | .                  | Gorai.009G252600.1 | . | . | . |
| Gorai.009G252600.1 | .                  | . | .                  | .                  | . | . | . |
| .                  | .                  | . | .                  | .                  | . | . | . |
| Vv18g1422          | .                  | . | .                  | Gorai.009G252700.1 | . | . | . |
| Gorai.009G252700.1 | .                  | . | .                  | .                  | . | . | . |
| .                  | .                  | . | .                  | .                  | . | . | . |
| Vv18g1423          | Tc08_g003050       | . | .                  | .                  | . | . | . |
| .                  | .                  | . | .                  | .                  | . | . | . |
| Vv18g1424          | Tc08_g001210       | . | Gorai.005G081000.1 | .                  | . | . | . |
| Gorai.009G252800.1 | Gorai.009G252800.1 | . | .                  | .                  | . | . | . |
| .                  | .                  | . | .                  | .                  | . | . | . |
| Vv18g1425          | Tc08_g009130       | . | .                  | .                  | . | . | . |
| .                  | .                  | . | .                  | .                  | . | . | . |
| .                  | .                  | . | .                  | .                  | . | . | . |

|           |              |   |                    |   |   |
|-----------|--------------|---|--------------------|---|---|
| Vv18g1426 | .            | . | Gorai.005G080600.1 | . | . |
| .         | .            | . | .                  | . | . |
| Vv18g1427 | .            | . | .                  | . | . |
| .         | .            | . | .                  | . | . |
| Vv18g1428 | .            | . | .                  | . | . |
| .         | .            | . | .                  | . | . |
| Vv18g1429 | .            | . | .                  | . | . |
| .         | .            | . | .                  | . | . |
| Vv18g1430 | .            | . | .                  | . | . |
| .         | .            | . | .                  | . | . |
| Vv18g1431 | .            | . | .                  | . | . |
| .         | .            | . | .                  | . | . |
| Vv18g1432 | .            | . | .                  | . | . |
| .         | .            | . | .                  | . | . |
| Vv18g1433 | .            | . | .                  | . | . |
| .         | .            | . | .                  | . | . |
| Vv18g1434 | .            | . | .                  | . | . |
| .         | .            | . | .                  | . | . |
| Vv18g1435 | .            | . | .                  | . | . |
| .         | .            | . | .                  | . | . |
| Vv18g1436 | Tc08_g002980 | . | .                  | . | . |
| .         | .            | . | .                  | . | . |
| Vv18g1437 | Tc08_g014800 | . | .                  | . | . |
| .         | .            | . | .                  | . | . |
| Vv18g1438 | .            | . | .                  | . | . |
| .         | .            | . | .                  | . | . |
| Vv18g1439 | .            | . | .                  | . | . |
| .         | .            | . | .                  | . | . |
| Vv18g1440 | .            | . | .                  | . | . |
| .         | .            | . | .                  | . | . |
| Vv18g1441 | .            | . | .                  | . | . |
| .         | .            | . | .                  | . | . |
| Vv18g1442 | .            | . | .                  | . | . |
| .         | .            | . | .                  | . | . |

|           |              |   |   |   |                    |   |   |
|-----------|--------------|---|---|---|--------------------|---|---|
| Vv18g1443 | .            | . | . | . | .                  | . | . |
| .         | .            | . | . | . | .                  | . | . |
| Vv18g1444 | .            | . | . | . | .                  | . | . |
| .         | .            | . | . | . | .                  | . | . |
| Vv18g1445 | .            | . | . | . | .                  | . | . |
| .         | .            | . | . | . | .                  | . | . |
| Vv18g1446 | .            | . | . | . | .                  | . | . |
| .         | .            | . | . | . | .                  | . | . |
| Vv18g1447 | .            | . | . | . | .                  | . | . |
| .         | .            | . | . | . | .                  | . | . |
| Vv18g1448 | .            | . | . | . | .                  | . | . |
| .         | .            | . | . | . | .                  | . | . |
| Vv18g1449 | .            | . | . | . | .                  | . | . |
| .         | .            | . | . | . | .                  | . | . |
| Vv18g1450 | .            | . | . | . | .                  | . | . |
| .         | .            | . | . | . | .                  | . | . |
| Vv18g1451 | .            | . | . | . | .                  | . | . |
| .         | .            | . | . | . | .                  | . | . |
| Vv18g1452 | .            | . | . | . | .                  | . | . |
| .         | .            | . | . | . | .                  | . | . |
| Vv18g1453 | .            | . | . | . | .                  | . | . |
| .         | .            | . | . | . | .                  | . | . |
| Vv18g1454 | .            | . | . | . | .                  | . | . |
| .         | .            | . | . | . | .                  | . | . |
| Vv18g1455 | Tc08_g001450 | . | . | . | Gorai.009G206300.1 | . | . |
| .         | .            | . | . | . | .                  | . | . |
| Vv18g1456 | .            | . | . | . | .                  | . | . |
| .         | .            | . | . | . | .                  | . | . |
| Vv18g1457 | .            | . | . | . | .                  | . | . |
| .         | .            | . | . | . | .                  | . | . |
| Vv18g1458 | Tc08_g011030 | . | . | . | .                  | . | . |
| .         | .            | . | . | . | .                  | . | . |
| Vv18g1459 | .            | . | . | . | .                  | . | . |



|           |              |   |   |   |                    |   |
|-----------|--------------|---|---|---|--------------------|---|
| .         | .            | . | . | . | .                  | . |
| .         | .            | . | . | . | .                  | . |
| Vv18g1460 | .            | . | . | . | .                  | . |
| .         | .            | . | . | . | .                  | . |
| .         | .            | . | . | . | .                  | . |
| Vv18g1461 | Tc08_g009850 | . | . | . | Gorai.009G242200.1 | . |
| .         | .            | . | . | . | .                  | . |
| .         | .            | . | . | . | .                  | . |
| Vv18g1462 | .            | . | . | . | .                  | . |
| .         | .            | . | . | . | .                  | . |
| .         | .            | . | . | . | .                  | . |
| Vv18g1463 | Tc08_g009840 | . | . | . | .                  | . |
| .         | .            | . | . | . | .                  | . |
| .         | .            | . | . | . | .                  | . |
| Vv18g1464 | Tc08_g008790 | . | . | . | .                  | . |
| .         | .            | . | . | . | .                  | . |
| .         | .            | . | . | . | .                  | . |
| Vv18g1465 | Tc08_g015160 | . | . | . | .                  | . |
| .         | .            | . | . | . | .                  | . |
| .         | .            | . | . | . | .                  | . |
| Vv18g1466 | .            | . | . | . | .                  | . |
| .         | .            | . | . | . | .                  | . |
| .         | .            | . | . | . | .                  | . |
| Vv18g1467 | .            | . | . | . | .                  | . |
| .         | .            | . | . | . | .                  | . |
| .         | .            | . | . | . | .                  | . |
| Vv18g1468 | .            | . | . | . | .                  | . |
| .         | .            | . | . | . | .                  | . |
| .         | .            | . | . | . | .                  | . |
| Vv18g1469 | .            | . | . | . | .                  | . |
| .         | .            | . | . | . | .                  | . |
| .         | .            | . | . | . | .                  | . |
| Vv18g1470 | Tc08_g011400 | . | . | . | .                  | . |
| .         | .            | . | . | . | .                  | . |
| .         | .            | . | . | . | .                  | . |
| Vv18g1471 | .            | . | . | . | .                  | . |
| .         | .            | . | . | . | .                  | . |
| .         | .            | . | . | . | .                  | . |
| Vv18g1472 | Tc08_g008390 | . | . | . | .                  | . |
| .         | .            | . | . | . | .                  | . |
| .         | .            | . | . | . | .                  | . |
| Vv18g1473 | .            | . | . | . | .                  | . |
| .         | .            | . | . | . | .                  | . |
| .         | .            | . | . | . | .                  | . |
| Vv18g1474 | .            | . | . | . | .                  | . |
| .         | .            | . | . | . | .                  | . |
| .         | .            | . | . | . | .                  | . |
| Vv18g1475 | .            | . | . | . | .                  | . |
| .         | .            | . | . | . | .                  | . |
| .         | .            | . | . | . | .                  | . |

|           |              |                    |   |   |   |   |   |
|-----------|--------------|--------------------|---|---|---|---|---|
| Vv18g1476 | .            | .                  | . | . | . | . | . |
| .         | .            | .                  | . | . | . | . | . |
| Vv18g1477 | .            | .                  | . | . | . | . | . |
| .         | .            | .                  | . | . | . | . | . |
| Vv18g1478 | Tc08_g011700 | .                  | . | . | . | . | . |
| .         | .            | .                  | . | . | . | . | . |
| Vv18g1479 | .            | .                  | . | . | . | . | . |
| .         | .            | .                  | . | . | . | . | . |
| Vv18g1480 | .            | .                  | . | . | . | . | . |
| .         | .            | .                  | . | . | . | . | . |
| Vv18g1481 | .            | .                  | . | . | . | . | . |
| .         | .            | .                  | . | . | . | . | . |
| Vv18g1482 | .            | .                  | . | . | . | . | . |
| .         | .            | .                  | . | . | . | . | . |
| Vv18g1483 | .            | .                  | . | . | . | . | . |
| .         | .            | .                  | . | . | . | . | . |
| Vv18g1484 | Tc08_g001810 | Gorai.002G129200.1 | . | . | . | . | . |
| .         | .            | .                  | . | . | . | . | . |
| Vv18g1485 | Tc08_g015390 | .                  | . | . | . | . | . |
| .         | .            | .                  | . | . | . | . | . |
| Vv18g1486 | .            | .                  | . | . | . | . | . |
| .         | .            | .                  | . | . | . | . | . |
| Vv18g1487 | .            | .                  | . | . | . | . | . |
| .         | .            | .                  | . | . | . | . | . |
| Vv18g1488 | .            | .                  | . | . | . | . | . |
| .         | .            | .                  | . | . | . | . | . |
| Vv18g1489 | .            | .                  | . | . | . | . | . |
| .         | .            | .                  | . | . | . | . | . |
| Vv18g1490 | .            | .                  | . | . | . | . | . |
| .         | .            | .                  | . | . | . | . | . |
| Vv18g1491 | .            | .                  | . | . | . | . | . |
| .         | .            | .                  | . | . | . | . | . |
| Vv18g1492 | .            | .                  | . | . | . | . | . |
| .         | .            | .                  | . | . | . | . | . |

|           |   |   |   |   |   |   |   |
|-----------|---|---|---|---|---|---|---|
| Vv18g1493 | . | . | . | . | . | . | . |
| .         | . | . | . | . | . | . | . |
| Vv18g1494 | . | . | . | . | . | . | . |
| .         | . | . | . | . | . | . | . |
| Vv18g1495 | . | . | . | . | . | . | . |
| .         | . | . | . | . | . | . | . |
| Vv18g1496 | . | . | . | . | . | . | . |
| .         | . | . | . | . | . | . | . |
| Vv18g1497 | . | . | . | . | . | . | . |
| .         | . | . | . | . | . | . | . |
| Vv18g1498 | . | . | . | . | . | . | . |
| .         | . | . | . | . | . | . | . |
| Vv18g1499 | . | . | . | . | . | . | . |
| .         | . | . | . | . | . | . | . |
| Vv18g1500 | . | . | . | . | . | . | . |
| .         | . | . | . | . | . | . | . |
| Vv18g1501 | . | . | . | . | . | . | . |
| .         | . | . | . | . | . | . | . |
| Vv18g1502 | . | . | . | . | . | . | . |
| .         | . | . | . | . | . | . | . |
| Vv18g1503 | . | . | . | . | . | . | . |
| .         | . | . | . | . | . | . | . |
| Vv18g1504 | . | . | . | . | . | . | . |
| .         | . | . | . | . | . | . | . |
| Vv18g1505 | . | . | . | . | . | . | . |
| .         | . | . | . | . | . | . | . |
| Vv18g1506 | . | . | . | . | . | . | . |
| .         | . | . | . | . | . | . | . |
| Vv18g1507 | . | . | . | . | . | . | . |
| .         | . | . | . | . | . | . | . |
| Vv18g1508 | . | . | . | . | . | . | . |
| .         | . | . | . | . | . | . | . |
| Vv18g1509 | . | . | . | . | . | . | . |

|           |              |   |   |   |                    |   |   |
|-----------|--------------|---|---|---|--------------------|---|---|
| .         | .            | . | . | . | .                  | . | . |
| .         | .            | . | . | . | .                  | . | . |
| Vv18g1510 | .            | . | . | . | .                  | . | . |
| .         | .            | . | . | . | .                  | . | . |
| Vv18g1511 | .            | . | . | . | .                  | . | . |
| .         | .            | . | . | . | .                  | . | . |
| Vv18g1512 | .            | . | . | . | .                  | . | . |
| .         | .            | . | . | . | .                  | . | . |
| Vv18g1513 | .            | . | . | . | .                  | . | . |
| .         | .            | . | . | . | .                  | . | . |
| Vv18g1514 | .            | . | . | . | .                  | . | . |
| .         | .            | . | . | . | .                  | . | . |
| Vv18g1515 | .            | . | . | . | .                  | . | . |
| .         | .            | . | . | . | .                  | . | . |
| Vv18g1516 | .            | . | . | . | .                  | . | . |
| .         | .            | . | . | . | .                  | . | . |
| Vv18g1517 | .            | . | . | . | .                  | . | . |
| .         | .            | . | . | . | .                  | . | . |
| Vv18g1518 | .            | . | . | . | .                  | . | . |
| .         | .            | . | . | . | .                  | . | . |
| Vv18g1519 | Tc08_g014170 | . | . | . | .                  | . | . |
| .         | .            | . | . | . | .                  | . | . |
| Vv18g1520 | Tc08_g014160 | . | . | . | .                  | . | . |
| .         | .            | . | . | . | .                  | . | . |
| Vv18g1521 | .            | . | . | . | .                  | . | . |
| .         | .            | . | . | . | .                  | . | . |
| Vv18g1522 | Tc08_g006520 | . | . | . | .                  | . | . |
| .         | .            | . | . | . | .                  | . | . |
| Vv18g1523 | .            | . | . | . | .                  | . | . |
| .         | .            | . | . | . | .                  | . | . |
| Vv18g1524 | .            | . | . | . | .                  | . | . |
| .         | .            | . | . | . | .                  | . | . |
| Vv18g1525 | Tc08_g006540 | . | . | . | Gorai.009G225800.1 | . | . |
| .         | .            | . | . | . | .                  | . | . |
| .         | .            | . | . | . | .                  | . | . |

|           |              |   |   |   |   |   |   |
|-----------|--------------|---|---|---|---|---|---|
| Vv18g1526 | .            | . | . | . | . | . | . |
| .         | .            | . | . | . | . | . | . |
| Vv18g1527 | .            | . | . | . | . | . | . |
| .         | .            | . | . | . | . | . | . |
| Vv18g1528 | .            | . | . | . | . | . | . |
| .         | .            | . | . | . | . | . | . |
| Vv18g1529 | Tc08_g014120 | . | . | . | . | . | . |
| .         | .            | . | . | . | . | . | . |
| Vv18g1530 | .            | . | . | . | . | . | . |
| .         | .            | . | . | . | . | . | . |
| Vv18g1531 | .            | . | . | . | . | . | . |
| .         | .            | . | . | . | . | . | . |
| Vv18g1532 | Tc08_g014110 | . | . | . | . | . | . |
| .         | .            | . | . | . | . | . | . |
| Vv18g1533 | Tc08_g014100 | . | . | . | . | . | . |
| .         | .            | . | . | . | . | . | . |
| Vv18g1534 | .            | . | . | . | . | . | . |
| .         | .            | . | . | . | . | . | . |
| Vv18g1535 | .            | . | . | . | . | . | . |
| .         | .            | . | . | . | . | . | . |
| Vv18g1536 | .            | . | . | . | . | . | . |
| .         | .            | . | . | . | . | . | . |
| Vv18g1537 | .            | . | . | . | . | . | . |
| .         | .            | . | . | . | . | . | . |
| Vv18g1538 | .            | . | . | . | . | . | . |
| .         | .            | . | . | . | . | . | . |
| Vv18g1539 | .            | . | . | . | . | . | . |
| .         | .            | . | . | . | . | . | . |
| Vv18g1540 | .            | . | . | . | . | . | . |
| .         | .            | . | . | . | . | . | . |
| Vv18g1541 | Tc08_g006570 | . | . | . | . | . | . |
| .         | .            | . | . | . | . | . | . |
| Vv18g1542 | .            | . | . | . | . | . | . |
| .         | .            | . | . | . | . | . | . |

|           |              |                    |  |                    |  |  |
|-----------|--------------|--------------------|--|--------------------|--|--|
| Vv18g1543 |              |                    |  |                    |  |  |
| Vv18g1544 | Tc08_g006640 |                    |  | Gorai.009G225100.1 |  |  |
| Vv18g1545 |              |                    |  |                    |  |  |
| Vv18g1546 |              |                    |  |                    |  |  |
| Vv18g1547 |              |                    |  |                    |  |  |
| Vv18g1548 |              |                    |  |                    |  |  |
| Vv18g1549 |              |                    |  |                    |  |  |
| Vv18g1550 |              |                    |  |                    |  |  |
| Vv18g1551 |              |                    |  |                    |  |  |
| Vv18g1552 |              |                    |  |                    |  |  |
| Vv18g1553 | Tc08_g014050 |                    |  |                    |  |  |
| Vv18g1554 |              |                    |  |                    |  |  |
| Vv18g1555 |              |                    |  |                    |  |  |
| Vv18g1556 |              |                    |  |                    |  |  |
| Vv18g1557 |              |                    |  |                    |  |  |
| Vv18g1558 | Tc08_g014030 |                    |  |                    |  |  |
| Vv18g1559 | Tc08_g013980 | Gorai.013G133000.1 |  |                    |  |  |

|           |              |                    |  |                    |  |  |
|-----------|--------------|--------------------|--|--------------------|--|--|
| Vv18g1560 |              |                    |  |                    |  |  |
| Vv18g1561 |              |                    |  |                    |  |  |
| Vv18g1562 |              |                    |  |                    |  |  |
| Vv18g1563 |              |                    |  |                    |  |  |
| Vv18g1564 | Tc08_g013960 |                    |  |                    |  |  |
| Vv18g1565 | Tc08_g013950 |                    |  |                    |  |  |
| Vv18g1566 |              |                    |  |                    |  |  |
| Vv18g1567 | Tc08_g006540 |                    |  | Gorai.009G225800.1 |  |  |
| Vv18g1568 |              |                    |  |                    |  |  |
| Vv18g1569 |              |                    |  |                    |  |  |
| Vv18g1570 |              |                    |  |                    |  |  |
| Vv18g1571 |              |                    |  |                    |  |  |
| Vv18g1572 | Tc08_g013910 | Gorai.013G133200.1 |  |                    |  |  |
| Vv18g1573 |              |                    |  |                    |  |  |
| Vv18g1574 |              |                    |  |                    |  |  |
| Vv18g1575 |              |                    |  |                    |  |  |

|           |              |   |   |   |   |   |
|-----------|--------------|---|---|---|---|---|
| Vv18g1576 | Tc08_g006570 | . | . | . | . | . |
| .         | .            | . | . | . | . | . |
| Vv18g1577 | .            | . | . | . | . | . |
| .         | .            | . | . | . | . | . |
| Vv18g1578 | .            | . | . | . | . | . |
| .         | .            | . | . | . | . | . |
| Vv18g1579 | .            | . | . | . | . | . |
| .         | .            | . | . | . | . | . |
| Vv18g1580 | .            | . | . | . | . | . |
| .         | .            | . | . | . | . | . |
| Vv18g1581 | .            | . | . | . | . | . |
| .         | .            | . | . | . | . | . |
| Vv18g1582 | .            | . | . | . | . | . |
| .         | .            | . | . | . | . | . |
| Vv18g1583 | .            | . | . | . | . | . |
| .         | .            | . | . | . | . | . |
| Vv18g1584 | .            | . | . | . | . | . |
| .         | .            | . | . | . | . | . |
| Vv18g1585 | .            | . | . | . | . | . |
| .         | .            | . | . | . | . | . |
| Vv18g1586 | .            | . | . | . | . | . |
| .         | .            | . | . | . | . | . |
| Vv18g1587 | .            | . | . | . | . | . |
| .         | .            | . | . | . | . | . |
| Vv18g1588 | .            | . | . | . | . | . |
| .         | .            | . | . | . | . | . |
| Vv18g1589 | .            | . | . | . | . | . |
| .         | .            | . | . | . | . | . |
| Vv18g1590 | .            | . | . | . | . | . |
| .         | .            | . | . | . | . | . |
| Vv18g1591 | .            | . | . | . | . | . |
| .         | .            | . | . | . | . | . |
| Vv18g1592 | .            | . | . | . | . | . |
| .         | .            | . | . | . | . | . |



|           |   |   |   |   |   |   |   |
|-----------|---|---|---|---|---|---|---|
| Vv18g1593 | . | . | . | . | . | . | . |
| .         | . | . | . | . | . | . | . |
| Vv18g1594 | . | . | . | . | . | . | . |
| .         | . | . | . | . | . | . | . |
| Vv18g1595 | . | . | . | . | . | . | . |
| .         | . | . | . | . | . | . | . |
| Vv18g1596 | . | . | . | . | . | . | . |
| .         | . | . | . | . | . | . | . |
| Vv18g1597 | . | . | . | . | . | . | . |
| .         | . | . | . | . | . | . | . |
| Vv18g1598 | . | . | . | . | . | . | . |
| .         | . | . | . | . | . | . | . |
| Vv18g1599 | . | . | . | . | . | . | . |
| .         | . | . | . | . | . | . | . |
| Vv18g1600 | . | . | . | . | . | . | . |
| .         | . | . | . | . | . | . | . |
| Vv18g1601 | . | . | . | . | . | . | . |
| .         | . | . | . | . | . | . | . |
| Vv18g1602 | . | . | . | . | . | . | . |
| .         | . | . | . | . | . | . | . |
| Vv18g1603 | . | . | . | . | . | . | . |
| .         | . | . | . | . | . | . | . |
| Vv18g1604 | . | . | . | . | . | . | . |
| .         | . | . | . | . | . | . | . |
| Vv18g1605 | . | . | . | . | . | . | . |
| .         | . | . | . | . | . | . | . |
| Vv18g1606 | . | . | . | . | . | . | . |
| .         | . | . | . | . | . | . | . |
| Vv18g1607 | . | . | . | . | . | . | . |
| .         | . | . | . | . | . | . | . |
| Vv18g1608 | . | . | . | . | . | . | . |
| .         | . | . | . | . | . | . | . |
| Vv18g1609 | . | . | . | . | . | . | . |

|           |   |   |   |   |   |   |   |
|-----------|---|---|---|---|---|---|---|
| .         | . | . | . | . | . | . | . |
| Vv18g1610 | . | . | . | . | . | . | . |
| .         | . | . | . | . | . | . | . |
| Vv18g1611 | . | . | . | . | . | . | . |
| .         | . | . | . | . | . | . | . |
| Vv18g1612 | . | . | . | . | . | . | . |
| .         | . | . | . | . | . | . | . |
| Vv18g1613 | . | . | . | . | . | . | . |
| .         | . | . | . | . | . | . | . |
| Vv18g1614 | . | . | . | . | . | . | . |
| .         | . | . | . | . | . | . | . |
| Vv18g1615 | . | . | . | . | . | . | . |
| .         | . | . | . | . | . | . | . |
| Vv18g1616 | . | . | . | . | . | . | . |
| .         | . | . | . | . | . | . | . |
| Vv18g1617 | . | . | . | . | . | . | . |
| .         | . | . | . | . | . | . | . |
| Vv18g1618 | . | . | . | . | . | . | . |
| .         | . | . | . | . | . | . | . |
| Vv18g1619 | . | . | . | . | . | . | . |
| .         | . | . | . | . | . | . | . |
| Vv18g1620 | . | . | . | . | . | . | . |
| .         | . | . | . | . | . | . | . |
| Vv18g1621 | . | . | . | . | . | . | . |
| .         | . | . | . | . | . | . | . |
| Vv18g1622 | . | . | . | . | . | . | . |
| .         | . | . | . | . | . | . | . |
| Vv18g1623 | . | . | . | . | . | . | . |
| .         | . | . | . | . | . | . | . |
| Vv18g1624 | . | . | . | . | . | . | . |
| .         | . | . | . | . | . | . | . |
| Vv18g1625 | . | . | . | . | . | . | . |
| .         | . | . | . | . | . | . | . |
| .         | . | . | . | . | . | . | . |

|           |   |   |   |   |   |   |   |
|-----------|---|---|---|---|---|---|---|
| Vv18g1626 | . | . | . | . | . | . | . |
| .         | . | . | . | . | . | . | . |
| Vv18g1627 | . | . | . | . | . | . | . |
| .         | . | . | . | . | . | . | . |
| Vv18g1628 | . | . | . | . | . | . | . |
| .         | . | . | . | . | . | . | . |
| Vv18g1629 | . | . | . | . | . | . | . |
| .         | . | . | . | . | . | . | . |
| Vv18g1630 | . | . | . | . | . | . | . |
| .         | . | . | . | . | . | . | . |
| Vv18g1631 | . | . | . | . | . | . | . |
| .         | . | . | . | . | . | . | . |
| Vv18g1632 | . | . | . | . | . | . | . |
| .         | . | . | . | . | . | . | . |
| Vv18g1633 | . | . | . | . | . | . | . |
| .         | . | . | . | . | . | . | . |
| Vv18g1634 | . | . | . | . | . | . | . |
| .         | . | . | . | . | . | . | . |
| Vv18g1635 | . | . | . | . | . | . | . |
| .         | . | . | . | . | . | . | . |
| Vv18g1636 | . | . | . | . | . | . | . |
| .         | . | . | . | . | . | . | . |
| Vv18g1637 | . | . | . | . | . | . | . |
| .         | . | . | . | . | . | . | . |
| Vv18g1638 | . | . | . | . | . | . | . |
| .         | . | . | . | . | . | . | . |
| Vv18g1639 | . | . | . | . | . | . | . |
| .         | . | . | . | . | . | . | . |
| Vv18g1640 | . | . | . | . | . | . | . |
| .         | . | . | . | . | . | . | . |
| Vv18g1641 | . | . | . | . | . | . | . |
| .         | . | . | . | . | . | . | . |
| Vv18g1642 | . | . | . | . | . | . | . |
| .         | . | . | . | . | . | . | . |



|                    |              |                    |                    |   |
|--------------------|--------------|--------------------|--------------------|---|
| Vv18g1659          | Tc08_g013830 | Gorai.013G133800.1 | .                  | . |
| .                  | .            | .                  | .                  | . |
| Vv18g1660          | Tc08_g013790 | .                  | Gorai.             | . |
| 009G266900.1       | .            | .                  | .                  | . |
| .                  | .            | .                  | .                  | . |
| Vv18g1661          | Tc08_g013780 | Gorai.013G134100.1 | .                  | . |
| Gorai.009G266800.1 | .            | .                  | .                  | . |
| .                  | .            | .                  | .                  | . |
| .                  | .            | .                  | .                  | . |
| Vv18g1662          | .            | .                  | .                  | . |
| .                  | .            | .                  | .                  | . |
| .                  | .            | .                  | .                  | . |
| Vv18g1663          | .            | .                  | Gorai.009G266700.1 | . |
| .                  | .            | .                  | .                  | . |
| .                  | .            | .                  | .                  | . |
| Vv18g1664          | Tc08_g013940 | .                  | .                  | . |
| .                  | .            | .                  | .                  | . |
| .                  | .            | .                  | .                  | . |
| Vv18g1665          | .            | .                  | .                  | . |
| .                  | .            | .                  | .                  | . |
| .                  | .            | .                  | .                  | . |
| Vv18g1666          | .            | .                  | .                  | . |
| .                  | .            | .                  | .                  | . |
| .                  | .            | .                  | .                  | . |
| Vv18g1667          | .            | .                  | .                  | . |
| .                  | .            | .                  | .                  | . |
| .                  | .            | .                  | .                  | . |
| Vv18g1668          | .            | .                  | .                  | . |
| .                  | .            | .                  | .                  | . |
| .                  | .            | .                  | .                  | . |
| Vv18g1669          | .            | .                  | .                  | . |
| .                  | .            | .                  | .                  | . |
| .                  | .            | .                  | .                  | . |
| Vv18g1670          | .            | Gorai.013G134500.1 | .                  | . |
| .                  | .            | .                  | .                  | . |
| .                  | .            | .                  | .                  | . |
| Vv18g1671          | .            | Gorai.013G134600.1 | .                  | . |
| .                  | .            | .                  | .                  | . |
| .                  | .            | .                  | .                  | . |
| Vv18g1672          | .            | .                  | .                  | . |
| .                  | .            | .                  | .                  | . |
| .                  | .            | .                  | .                  | . |
| Vv18g1673          | .            | .                  | .                  | . |
| .                  | .            | .                  | .                  | . |
| .                  | .            | .                  | .                  | . |
| Vv18g1674          | .            | .                  | .                  | . |
| .                  | .            | .                  | .                  | . |
| .                  | .            | .                  | .                  | . |
| Vv18g1675          | .            | .                  | .                  | . |

|           |   |   |   |   |   |   |   |
|-----------|---|---|---|---|---|---|---|
| .         | . | . | . | . | . | . | . |
| Vv18g1676 | . | . | . | . | . | . | . |
| .         | . | . | . | . | . | . | . |
| Vv18g1677 | . | . | . | . | . | . | . |
| .         | . | . | . | . | . | . | . |
| Vv18g1678 | . | . | . | . | . | . | . |
| .         | . | . | . | . | . | . | . |
| Vv18g1679 | . | . | . | . | . | . | . |
| .         | . | . | . | . | . | . | . |
| Vv18g1680 | . | . | . | . | . | . | . |
| .         | . | . | . | . | . | . | . |
| Vv18g1681 | . | . | . | . | . | . | . |
| .         | . | . | . | . | . | . | . |
| Vv18g1682 | . | . | . | . | . | . | . |
| .         | . | . | . | . | . | . | . |
| Vv18g1683 | . | . | . | . | . | . | . |
| .         | . | . | . | . | . | . | . |
| Vv18g1684 | . | . | . | . | . | . | . |
| .         | . | . | . | . | . | . | . |
| Vv18g1685 | . | . | . | . | . | . | . |
| .         | . | . | . | . | . | . | . |
| Vv18g1686 | . | . | . | . | . | . | . |
| .         | . | . | . | . | . | . | . |
| Vv18g1687 | . | . | . | . | . | . | . |
| .         | . | . | . | . | . | . | . |
| Vv18g1688 | . | . | . | . | . | . | . |
| .         | . | . | . | . | . | . | . |
| Vv18g1689 | . | . | . | . | . | . | . |
| .         | . | . | . | . | . | . | . |
| Vv18g1690 | . | . | . | . | . | . | . |
| .         | . | . | . | . | . | . | . |
| Vv18g1691 | . | . | . | . | . | . | . |
| .         | . | . | . | . | . | . | . |
| .         | . | . | . | . | . | . | . |

|              |              |   |   |   |   |                    |   |
|--------------|--------------|---|---|---|---|--------------------|---|
| Vv18g1692    | .            | . | . | . | . | .                  | . |
| .            | .            | . | . | . | . | .                  | . |
| Vv18g1693    | .            | . | . | . | . | .                  | . |
| .            | .            | . | . | . | . | .                  | . |
| Vv18g1694    | .            | . | . | . | . | .                  | . |
| .            | .            | . | . | . | . | .                  | . |
| Vv18g1695    | .            | . | . | . | . | .                  | . |
| .            | .            | . | . | . | . | .                  | . |
| Vv18g1696    | .            | . | . | . | . | .                  | . |
| .            | .            | . | . | . | . | .                  | . |
| Vv18g1697    | .            | . | . | . | . | .                  | . |
| .            | .            | . | . | . | . | .                  | . |
| Vv18g1698    | .            | . | . | . | . | .                  | . |
| .            | .            | . | . | . | . | .                  | . |
| Vv18g1699    | .            | . | . | . | . | .                  | . |
| .            | .            | . | . | . | . | .                  | . |
| Vv18g1700    | .            | . | . | . | . | .                  | . |
| .            | .            | . | . | . | . | .                  | . |
| Vv18g1701    | .            | . | . | . | . | .                  | . |
| .            | .            | . | . | . | . | .                  | . |
| Vv18g1702    | .            | . | . | . | . | .                  | . |
| .            | .            | . | . | . | . | .                  | . |
| Vv18g1703    | .            | . | . | . | . | Gorai.009G266300.1 | . |
| .            | .            | . | . | . | . | .                  | . |
| Vv18g1704    | Tc08_g013700 | . | . | . | . | Gorai.             | . |
| 009G266200.1 | .            | . | . | . | . | .                  | . |
| Vv18g1705    | .            | . | . | . | . | .                  | . |
| .            | .            | . | . | . | . | .                  | . |
| Vv18g1706    | .            | . | . | . | . | .                  | . |
| .            | .            | . | . | . | . | .                  | . |
| Vv18g1707    | .            | . | . | . | . | .                  | . |
| .            | .            | . | . | . | . | .                  | . |
| Vv18g1708    | .            | . | . | . | . | .                  | . |
| .            | .            | . | . | . | . | .                  | . |

|              |              |                    |   |                    |   |
|--------------|--------------|--------------------|---|--------------------|---|
| Vv18g1709    | .            | Gorai.013G134900.1 | . | .                  | . |
| .            | .            | .                  | . | .                  | . |
| Vv18g1710    | .            | .                  | . | .                  | . |
| .            | .            | .                  | . | .                  | . |
| Vv18g1711    | .            | .                  | . | Gorai.009G265800.1 | . |
| .            | .            | .                  | . | .                  | . |
| Vv18g1712    | Tc08_g008610 | .                  | . | Gorai.             | . |
| 009G265700.1 | .            | .                  | . | .                  | . |
| .            | .            | .                  | . | .                  | . |
| Vv18g1713    | .            | .                  | . | .                  | . |
| .            | .            | .                  | . | .                  | . |
| Vv18g1714    | .            | .                  | . | .                  | . |
| .            | .            | .                  | . | .                  | . |
| Vv18g1715    | .            | .                  | . | .                  | . |
| .            | .            | .                  | . | .                  | . |
| Vv18g1716    | .            | .                  | . | .                  | . |
| .            | .            | .                  | . | .                  | . |
| Vv18g1717    | .            | .                  | . | .                  | . |
| .            | .            | .                  | . | .                  | . |
| Vv18g1718    | .            | .                  | . | .                  | . |
| .            | .            | .                  | . | .                  | . |
| Vv18g1719    | .            | .                  | . | .                  | . |
| .            | .            | .                  | . | .                  | . |
| Vv18g1720    | .            | .                  | . | .                  | . |
| .            | .            | .                  | . | .                  | . |
| Vv18g1721    | .            | .                  | . | .                  | . |
| .            | .            | .                  | . | .                  | . |
| Vv18g1722    | .            | .                  | . | .                  | . |
| .            | .            | .                  | . | .                  | . |
| Vv18g1723    | .            | .                  | . | .                  | . |
| .            | .            | .                  | . | .                  | . |
| Vv18g1724    | .            | .                  | . | .                  | . |
| .            | .            | .                  | . | .                  | . |
| Vv18g1725    | .            | .                  | . | .                  | . |



|           |   |   |   |   |   |   |   |
|-----------|---|---|---|---|---|---|---|
| .         | . | . | . | . | . | . | . |
| Vv18g1726 | . | . | . | . | . | . | . |
| .         | . | . | . | . | . | . | . |
| Vv18g1727 | . | . | . | . | . | . | . |
| .         | . | . | . | . | . | . | . |
| Vv18g1728 | . | . | . | . | . | . | . |
| .         | . | . | . | . | . | . | . |
| Vv18g1729 | . | . | . | . | . | . | . |
| .         | . | . | . | . | . | . | . |
| Vv18g1730 | . | . | . | . | . | . | . |
| .         | . | . | . | . | . | . | . |
| Vv18g1731 | . | . | . | . | . | . | . |
| .         | . | . | . | . | . | . | . |
| Vv18g1732 | . | . | . | . | . | . | . |
| .         | . | . | . | . | . | . | . |
| Vv18g1733 | . | . | . | . | . | . | . |
| .         | . | . | . | . | . | . | . |
| Vv18g1734 | . | . | . | . | . | . | . |
| .         | . | . | . | . | . | . | . |
| Vv18g1735 | . | . | . | . | . | . | . |
| .         | . | . | . | . | . | . | . |
| Vv18g1736 | . | . | . | . | . | . | . |
| .         | . | . | . | . | . | . | . |
| Vv18g1737 | . | . | . | . | . | . | . |
| .         | . | . | . | . | . | . | . |
| Vv18g1738 | . | . | . | . | . | . | . |
| .         | . | . | . | . | . | . | . |
| Vv18g1739 | . | . | . | . | . | . | . |
| .         | . | . | . | . | . | . | . |
| Vv18g1740 | . | . | . | . | . | . | . |
| .         | . | . | . | . | . | . | . |
| Vv18g1741 | . | . | . | . | . | . | . |
| .         | . | . | . | . | . | . | . |
| .         | . | . | . | . | . | . | . |

|                    |              |                    |   |   |   |                    |   |
|--------------------|--------------|--------------------|---|---|---|--------------------|---|
| Vv18g1742          | .            | .                  | . | . | . | .                  | . |
| .                  | .            | .                  | . | . | . | .                  | . |
| Vv18g1743          | .            | .                  | . | . | . | .                  | . |
| .                  | .            | .                  | . | . | . | .                  | . |
| Vv18g1744          | .            | .                  | . | . | . | .                  | . |
| .                  | .            | .                  | . | . | . | .                  | . |
| Vv18g1745          | .            | .                  | . | . | . | .                  | . |
| .                  | .            | .                  | . | . | . | .                  | . |
| Vv18g1746          | .            | .                  | . | . | . | Gorai.009G265500.1 | . |
| .                  | .            | .                  | . | . | . | .                  | . |
| Vv18g1747          | .            | .                  | . | . | . | .                  | . |
| .                  | .            | .                  | . | . | . | .                  | . |
| Vv18g1748          | .            | .                  | . | . | . | .                  | . |
| .                  | .            | .                  | . | . | . | .                  | . |
| Vv18g1749          | .            | .                  | . | . | . | .                  | . |
| .                  | .            | .                  | . | . | . | .                  | . |
| Vv18g1750          | .            | .                  | . | . | . | .                  | . |
| .                  | .            | .                  | . | . | . | .                  | . |
| Vv18g1751          | .            | .                  | . | . | . | .                  | . |
| .                  | .            | .                  | . | . | . | .                  | . |
| Vv18g1752          | Tc08_g008720 | .                  | . | . | . | Gorai.009G234500.1 | . |
| .                  | .            | .                  | . | . | . | .                  | . |
| Vv18g1753          | .            | .                  | . | . | . | .                  | . |
| .                  | .            | .                  | . | . | . | .                  | . |
| Vv18g1754          | .            | Gorai.013G135200.1 | . | . | . | .                  | . |
| Gorai.009G265100.1 | .            | .                  | . | . | . | .                  | . |
| .                  | .            | .                  | . | . | . | .                  | . |
| Vv18g1755          | .            | .                  | . | . | . | .                  | . |
| .                  | .            | .                  | . | . | . | .                  | . |
| Vv18g1756          | .            | .                  | . | . | . | .                  | . |
| .                  | .            | .                  | . | . | . | .                  | . |
| Vv18g1757          | .            | .                  | . | . | . | .                  | . |
| .                  | .            | .                  | . | . | . | .                  | . |
| Vv18g1758          | .            | .                  | . | . | . | Gorai.009G262100.1 | . |

|           |   |   |   |   |   |   |   |
|-----------|---|---|---|---|---|---|---|
| .         | . | . | . | . | . | . | . |
| Vv18g1759 | . | . | . | . | . | . | . |
| .         | . | . | . | . | . | . | . |
| Vv18g1760 | . | . | . | . | . | . | . |
| .         | . | . | . | . | . | . | . |
| Vv18g1761 | . | . | . | . | . | . | . |
| .         | . | . | . | . | . | . | . |
| Vv18g1762 | . | . | . | . | . | . | . |
| .         | . | . | . | . | . | . | . |
| Vv18g1763 | . | . | . | . | . | . | . |
| .         | . | . | . | . | . | . | . |
| Vv18g1764 | . | . | . | . | . | . | . |
| .         | . | . | . | . | . | . | . |
| Vv18g1765 | . | . | . | . | . | . | . |
| .         | . | . | . | . | . | . | . |
| Vv18g1766 | . | . | . | . | . | . | . |
| .         | . | . | . | . | . | . | . |
| Vv18g1767 | . | . | . | . | . | . | . |
| .         | . | . | . | . | . | . | . |
| Vv18g1768 | . | . | . | . | . | . | . |
| .         | . | . | . | . | . | . | . |
| Vv18g1769 | . | . | . | . | . | . | . |
| .         | . | . | . | . | . | . | . |
| Vv18g1770 | . | . | . | . | . | . | . |
| .         | . | . | . | . | . | . | . |
| Vv18g1771 | . | . | . | . | . | . | . |
| .         | . | . | . | . | . | . | . |
| Vv18g1772 | . | . | . | . | . | . | . |
| .         | . | . | . | . | . | . | . |
| Vv18g1773 | . | . | . | . | . | . | . |
| .         | . | . | . | . | . | . | . |
| Vv18g1774 | . | . | . | . | . | . | . |
| .         | . | . | . | . | . | . | . |
| .         | . | . | . | . | . | . | . |

|           |              |   |   |   |                    |   |   |
|-----------|--------------|---|---|---|--------------------|---|---|
| Vv18g1775 | .            | . | . | . | .                  | . | . |
| .         | .            | . | . | . | .                  | . | . |
| Vv18g1776 | .            | . | . | . | .                  | . | . |
| .         | .            | . | . | . | .                  | . | . |
| Vv18g1777 | .            | . | . | . | .                  | . | . |
| .         | .            | . | . | . | .                  | . | . |
| Vv18g1778 | .            | . | . | . | .                  | . | . |
| .         | .            | . | . | . | .                  | . | . |
| Vv18g1779 | .            | . | . | . | .                  | . | . |
| .         | .            | . | . | . | .                  | . | . |
| Vv18g1780 | Tc08_g006200 | . | . | . | Gorai.009G228400.1 | . | . |
| .         | .            | . | . | . | .                  | . | . |
| Vv18g1781 | .            | . | . | . | .                  | . | . |
| .         | .            | . | . | . | .                  | . | . |
| Vv18g1782 | .            | . | . | . | .                  | . | . |
| .         | .            | . | . | . | .                  | . | . |
| Vv18g1783 | .            | . | . | . | .                  | . | . |
| .         | .            | . | . | . | .                  | . | . |
| Vv18g1784 | .            | . | . | . | .                  | . | . |
| .         | .            | . | . | . | .                  | . | . |
| Vv18g1785 | Tc08_g006290 | . | . | . | Gorai.009G227500.1 | . | . |
| .         | .            | . | . | . | .                  | . | . |
| Vv18g1786 | .            | . | . | . | .                  | . | . |
| .         | .            | . | . | . | .                  | . | . |
| Vv18g1787 | .            | . | . | . | .                  | . | . |
| .         | .            | . | . | . | .                  | . | . |
| Vv18g1788 | .            | . | . | . | .                  | . | . |
| .         | .            | . | . | . | .                  | . | . |
| Vv18g1789 | .            | . | . | . | .                  | . | . |
| .         | .            | . | . | . | .                  | . | . |
| Vv18g1790 | .            | . | . | . | .                  | . | . |
| .         | .            | . | . | . | .                  | . | . |
| Vv18g1791 | .            | . | . | . | .                  | . | . |
| .         | .            | . | . | . | .                  | . | . |

|           |              |   |   |   |   |   |   |
|-----------|--------------|---|---|---|---|---|---|
| Vv18g1792 | .            | . | . | . | . | . | . |
| .         | .            | . | . | . | . | . | . |
| Vv18g1793 | .            | . | . | . | . | . | . |
| .         | .            | . | . | . | . | . | . |
| Vv18g1794 | .            | . | . | . | . | . | . |
| .         | .            | . | . | . | . | . | . |
| Vv18g1795 | .            | . | . | . | . | . | . |
| .         | .            | . | . | . | . | . | . |
| Vv18g1796 | .            | . | . | . | . | . | . |
| .         | .            | . | . | . | . | . | . |
| Vv18g1797 | Tc08_g002480 | . | . | . | . | . | . |
| .         | .            | . | . | . | . | . | . |
| Vv18g1798 | Tc08_g001360 | . | . | . | . | . | . |
| .         | .            | . | . | . | . | . | . |
| Vv18g1799 | .            | . | . | . | . | . | . |
| .         | .            | . | . | . | . | . | . |
| Vv18g1800 | .            | . | . | . | . | . | . |
| .         | .            | . | . | . | . | . | . |
| Vv18g1801 | .            | . | . | . | . | . | . |
| .         | .            | . | . | . | . | . | . |
| Vv18g1802 | .            | . | . | . | . | . | . |
| .         | .            | . | . | . | . | . | . |
| Vv18g1803 | .            | . | . | . | . | . | . |
| .         | .            | . | . | . | . | . | . |
| Vv18g1804 | .            | . | . | . | . | . | . |
| .         | .            | . | . | . | . | . | . |
| Vv18g1805 | .            | . | . | . | . | . | . |
| .         | .            | . | . | . | . | . | . |
| Vv18g1806 | .            | . | . | . | . | . | . |
| .         | .            | . | . | . | . | . | . |
| Vv18g1807 | .            | . | . | . | . | . | . |
| .         | .            | . | . | . | . | . | . |
| Vv18g1808 | .            | . | . | . | . | . | . |

|           |              |   |   |   |                    |   |   |
|-----------|--------------|---|---|---|--------------------|---|---|
| .         | .            | . | . | . | .                  | . | . |
| .         | .            | . | . | . | .                  | . | . |
| Vv18g1809 | .            | . | . | . | .                  | . | . |
| .         | .            | . | . | . | .                  | . | . |
| Vv18g1810 | .            | . | . | . | .                  | . | . |
| .         | .            | . | . | . | .                  | . | . |
| Vv18g1811 | .            | . | . | . | .                  | . | . |
| .         | .            | . | . | . | .                  | . | . |
| Vv18g1812 | .            | . | . | . | .                  | . | . |
| .         | .            | . | . | . | .                  | . | . |
| Vv18g1813 | .            | . | . | . | .                  | . | . |
| .         | .            | . | . | . | .                  | . | . |
| Vv18g1814 | .            | . | . | . | .                  | . | . |
| .         | .            | . | . | . | .                  | . | . |
| Vv18g1815 | .            | . | . | . | .                  | . | . |
| .         | .            | . | . | . | .                  | . | . |
| Vv18g1816 | .            | . | . | . | .                  | . | . |
| .         | .            | . | . | . | .                  | . | . |
| Vv18g1817 | .            | . | . | . | .                  | . | . |
| .         | .            | . | . | . | .                  | . | . |
| Vv18g1818 | .            | . | . | . | .                  | . | . |
| .         | .            | . | . | . | .                  | . | . |
| Vv18g1819 | Tc08_g006520 | . | . | . | .                  | . | . |
| .         | .            | . | . | . | .                  | . | . |
| Vv18g1820 | .            | . | . | . | .                  | . | . |
| .         | .            | . | . | . | .                  | . | . |
| Vv18g1821 | .            | . | . | . | .                  | . | . |
| .         | .            | . | . | . | .                  | . | . |
| Vv18g1822 | Tc08_g002460 | . | . | . | .                  | . | . |
| .         | .            | . | . | . | .                  | . | . |
| Vv18g1823 | .            | . | . | . | .                  | . | . |
| .         | .            | . | . | . | .                  | . | . |
| Vv18g1824 | Tc08_g006540 | . | . | . | Gorai.009G225800.1 | . | . |
| .         | .            | . | . | . | .                  | . | . |
| .         | .            | . | . | . | .                  | . | . |

|           |              |                    |   |   |   |   |   |
|-----------|--------------|--------------------|---|---|---|---|---|
| Vv18g1825 | .            | .                  | . | . | . | . | . |
| .         | .            | .                  | . | . | . | . | . |
| Vv18g1826 | .            | .                  | . | . | . | . | . |
| .         | .            | .                  | . | . | . | . | . |
| Vv18g1827 | .            | .                  | . | . | . | . | . |
| .         | .            | .                  | . | . | . | . | . |
| Vv18g1828 | Tc08_g001300 | .                  | . | . | . | . | . |
| .         | .            | .                  | . | . | . | . | . |
| Vv18g1829 | .            | .                  | . | . | . | . | . |
| .         | .            | .                  | . | . | . | . | . |
| Vv18g1830 | Tc08_g006570 | .                  | . | . | . | . | . |
| .         | .            | .                  | . | . | . | . | . |
| Vv18g1831 | Tc08_g001290 | .                  | . | . | . | . | . |
| .         | .            | .                  | . | . | . | . | . |
| Vv18g1832 | .            | .                  | . | . | . | . | . |
| .         | .            | .                  | . | . | . | . | . |
| Vv18g1833 | .            | .                  | . | . | . | . | . |
| .         | .            | .                  | . | . | . | . | . |
| Vv18g1834 | .            | .                  | . | . | . | . | . |
| .         | .            | .                  | . | . | . | . | . |
| Vv18g1835 | .            | .                  | . | . | . | . | . |
| .         | .            | .                  | . | . | . | . | . |
| Vv18g1836 | .            | .                  | . | . | . | . | . |
| .         | .            | .                  | . | . | . | . | . |
| Vv18g1837 | .            | .                  | . | . | . | . | . |
| .         | .            | .                  | . | . | . | . | . |
| Vv18g1838 | .            | .                  | . | . | . | . | . |
| .         | .            | .                  | . | . | . | . | . |
| Vv18g1839 | .            | .                  | . | . | . | . | . |
| .         | .            | .                  | . | . | . | . | . |
| Vv18g1840 | .            | .                  | . | . | . | . | . |
| .         | .            | .                  | . | . | . | . | . |
| Vv18g1841 | Tc08_g002130 | Gorai.002G127700.1 | . | . | . | . | . |
| .         | .            | .                  | . | . | . | . | . |

|           |              |   |   |   |                    |   |   |
|-----------|--------------|---|---|---|--------------------|---|---|
| Vv18g1842 | .            | . | . | . | .                  | . | . |
| .         | .            | . | . | . | .                  | . | . |
| Vv18g1843 | .            | . | . | . | .                  | . | . |
| .         | .            | . | . | . | .                  | . | . |
| Vv18g1844 | .            | . | . | . | .                  | . | . |
| .         | .            | . | . | . | .                  | . | . |
| Vv18g1845 | .            | . | . | . | .                  | . | . |
| .         | .            | . | . | . | .                  | . | . |
| Vv18g1846 | .            | . | . | . | .                  | . | . |
| .         | .            | . | . | . | .                  | . | . |
| Vv18g1847 | .            | . | . | . | .                  | . | . |
| .         | .            | . | . | . | .                  | . | . |
| Vv18g1848 | .            | . | . | . | .                  | . | . |
| .         | .            | . | . | . | .                  | . | . |
| Vv18g1849 | Tc08_g006640 | . | . | . | Gorai.009G225100.1 | . | . |
| .         | .            | . | . | . | .                  | . | . |
| Vv18g1850 | .            | . | . | . | .                  | . | . |
| .         | .            | . | . | . | .                  | . | . |
| Vv18g1851 | .            | . | . | . | .                  | . | . |
| .         | .            | . | . | . | .                  | . | . |
| Vv18g1852 | .            | . | . | . | .                  | . | . |
| .         | .            | . | . | . | .                  | . | . |
| Vv18g1853 | .            | . | . | . | .                  | . | . |
| .         | .            | . | . | . | .                  | . | . |
| Vv18g1854 | .            | . | . | . | .                  | . | . |
| .         | .            | . | . | . | .                  | . | . |
| Vv18g1855 | .            | . | . | . | .                  | . | . |
| .         | .            | . | . | . | .                  | . | . |
| Vv18g1856 | .            | . | . | . | .                  | . | . |
| .         | .            | . | . | . | .                  | . | . |
| Vv18g1857 | .            | . | . | . | .                  | . | . |
| .         | .            | . | . | . | .                  | . | . |
| Vv18g1858 | Tc08_g006680 | . | . | . | .                  | . | . |



|           |              |   |   |   |   |   |   |
|-----------|--------------|---|---|---|---|---|---|
| .         | .            | . | . | . | . | . | . |
| Vv18g1859 | .            | . | . | . | . | . | . |
| .         | .            | . | . | . | . | . | . |
| Vv18g1860 | .            | . | . | . | . | . | . |
| .         | .            | . | . | . | . | . | . |
| Vv18g1861 | .            | . | . | . | . | . | . |
| .         | .            | . | . | . | . | . | . |
| Vv18g1862 | .            | . | . | . | . | . | . |
| .         | .            | . | . | . | . | . | . |
| Vv18g1863 | .            | . | . | . | . | . | . |
| .         | .            | . | . | . | . | . | . |
| Vv18g1864 | .            | . | . | . | . | . | . |
| .         | .            | . | . | . | . | . | . |
| Vv18g1865 | .            | . | . | . | . | . | . |
| .         | .            | . | . | . | . | . | . |
| Vv18g1866 | .            | . | . | . | . | . | . |
| .         | .            | . | . | . | . | . | . |
| Vv18g1867 | .            | . | . | . | . | . | . |
| .         | .            | . | . | . | . | . | . |
| Vv18g1868 | .            | . | . | . | . | . | . |
| .         | .            | . | . | . | . | . | . |
| Vv18g1869 | .            | . | . | . | . | . | . |
| .         | .            | . | . | . | . | . | . |
| Vv18g1870 | .            | . | . | . | . | . | . |
| .         | .            | . | . | . | . | . | . |
| Vv18g1871 | .            | . | . | . | . | . | . |
| .         | .            | . | . | . | . | . | . |
| Vv18g1872 | .            | . | . | . | . | . | . |
| .         | .            | . | . | . | . | . | . |
| Vv18g1873 | .            | . | . | . | . | . | . |
| .         | .            | . | . | . | . | . | . |
| Vv18g1874 | Tc08_g002390 | . | . | . | . | . | . |
| .         | .            | . | . | . | . | . | . |
| .         | .            | . | . | . | . | . | . |

|           |   |   |   |   |   |   |   |
|-----------|---|---|---|---|---|---|---|
| Vv18g1875 | . | . | . | . | . | . | . |
| .         | . | . | . | . | . | . | . |
| Vv18g1876 | . | . | . | . | . | . | . |
| .         | . | . | . | . | . | . | . |
| Vv18g1877 | . | . | . | . | . | . | . |
| .         | . | . | . | . | . | . | . |
| Vv18g1878 | . | . | . | . | . | . | . |
| .         | . | . | . | . | . | . | . |
| Vv18g1879 | . | . | . | . | . | . | . |
| .         | . | . | . | . | . | . | . |
| Vv18g1880 | . | . | . | . | . | . | . |
| .         | . | . | . | . | . | . | . |
| Vv18g1881 | . | . | . | . | . | . | . |
| .         | . | . | . | . | . | . | . |
| Vv18g1882 | . | . | . | . | . | . | . |
| .         | . | . | . | . | . | . | . |
| Vv18g1883 | . | . | . | . | . | . | . |
| .         | . | . | . | . | . | . | . |
| Vv18g1884 | . | . | . | . | . | . | . |
| .         | . | . | . | . | . | . | . |
| Vv18g1885 | . | . | . | . | . | . | . |
| .         | . | . | . | . | . | . | . |
| Vv18g1886 | . | . | . | . | . | . | . |
| .         | . | . | . | . | . | . | . |
| Vv19g0001 | . | . | . | . | . | . | . |
| .         | . | . | . | . | . | . | . |
| Vv19g0002 | . | . | . | . | . | . | . |
| .         | . | . | . | . | . | . | . |
| Vv19g0003 | . | . | . | . | . | . | . |
| .         | . | . | . | . | . | . | . |
| Vv19g0004 | . | . | . | . | . | . | . |
| .         | . | . | . | . | . | . | . |
| Vv19g0005 | . | . | . | . | . | . | . |
| .         | . | . | . | . | . | . | . |

|                    |              |                    |                    |   |
|--------------------|--------------|--------------------|--------------------|---|
| Vv19g0006          | Tc07_g011860 | Gorai.013G176100.1 | .                  | . |
| .                  | .            | .                  | .                  | . |
| Vv19g0007          | .            | .                  | .                  | . |
| .                  | .            | .                  | .                  | . |
| Vv19g0008          | .            | .                  | .                  | . |
| .                  | .            | .                  | .                  | . |
| Vv19g0009          | Tc07_g011840 | .                  | Gorai.002G044300.1 | . |
| .                  | .            | .                  | .                  | . |
| Vv19g0010          | Tc07_g011830 | Gorai.013G176000.1 | .                  | . |
| .                  | .            | .                  | .                  | . |
| Vv19g0011          | Tc07_g011790 | .                  | Gorai.002G044400.1 | . |
| .                  | .            | .                  | .                  | . |
| Vv19g0012          | .            | .                  | .                  | . |
| .                  | .            | .                  | .                  | . |
| Vv19g0013          | .            | .                  | .                  | . |
| .                  | .            | .                  | .                  | . |
| Vv19g0014          | .            | .                  | .                  | . |
| .                  | .            | .                  | .                  | . |
| Vv19g0015          | .            | .                  | .                  | . |
| .                  | .            | .                  | .                  | . |
| Vv19g0016          | Tc07_g011670 | .                  | .                  | . |
| .                  | .            | .                  | .                  | . |
| Vv19g0017          | .            | Gorai.007G334500.1 | .                  | . |
| .                  | .            | .                  | .                  | . |
| Vv19g0018          | .            | .                  | .                  | . |
| .                  | .            | .                  | .                  | . |
| Vv19g0019          | Tc07_g012900 | .                  | .                  | . |
| Gorai.004G270500.1 | .            | .                  | .                  | . |
| .                  | .            | .                  | .                  | . |
| Vv19g0020          | Tc07_g012890 | .                  | .                  | . |
| .                  | .            | .                  | .                  | . |
| Vv19g0021          | .            | .                  | .                  | . |
| .                  | .            | .                  | .                  | . |
| Vv19g0022          | .            | .                  | .                  | . |

|              |   |                    |   |                    |                    |        |   |
|--------------|---|--------------------|---|--------------------|--------------------|--------|---|
| .            | . | .                  | . | .                  | .                  | .      | . |
| .            | . | .                  | . | .                  | .                  | .      | . |
| Vv19g0023    | . | .                  | . | .                  | .                  | .      | . |
| .            | . | .                  | . | .                  | .                  | .      | . |
| .            | . | .                  | . | .                  | .                  | .      | . |
| Vv19g0024    | . | .                  | . | .                  | .                  | Gorai. | . |
| 004G270900.1 | . | .                  | . | .                  | .                  | .      | . |
| .            | . | .                  | . | .                  | .                  | .      | . |
| Vv19g0025    | . | .                  | . | .                  | .                  | .      | . |
| .            | . | .                  | . | .                  | .                  | .      | . |
| .            | . | .                  | . | .                  | .                  | .      | . |
| Vv19g0026    | . | .                  | . | .                  | .                  | .      | . |
| .            | . | .                  | . | .                  | .                  | .      | . |
| .            | . | .                  | . | .                  | .                  | .      | . |
| Vv19g0027    | . | .                  | . | .                  | .                  | .      | . |
| .            | . | .                  | . | .                  | .                  | .      | . |
| .            | . | .                  | . | .                  | .                  | .      | . |
| Vv19g0028    | . | .                  | . | .                  | Gorai.002G045800.1 | .      | . |
| .            | . | .                  | . | .                  | .                  | .      | . |
| .            | . | .                  | . | .                  | .                  | .      | . |
| Vv19g0029    | . | .                  | . | .                  | .                  | .      | . |
| .            | . | .                  | . | .                  | .                  | .      | . |
| .            | . | .                  | . | .                  | .                  | .      | . |
| Vv19g0030    | . | .                  | . | .                  | Gorai.002G046000.1 | .      | . |
| .            | . | .                  | . | .                  | .                  | .      | . |
| .            | . | .                  | . | .                  | .                  | .      | . |
| Vv19g0031    | . | .                  | . | Gorai.007G332200.1 | .                  | .      | . |
| .            | . | .                  | . | .                  | .                  | .      | . |
| .            | . | .                  | . | .                  | .                  | .      | . |
| Vv19g0032    | . | .                  | . | Gorai.007G332100.1 | .                  | .      | . |
| .            | . | .                  | . | .                  | .                  | .      | . |
| .            | . | .                  | . | .                  | .                  | .      | . |
| Vv19g0033    | . | .                  | . | Gorai.007G332000.1 | .                  | Gorai. | . |
| 002G046200.1 | . | Gorai.004G271200.1 | . | .                  | .                  | .      | . |
| .            | . | .                  | . | .                  | .                  | .      | . |
| .            | . | .                  | . | .                  | .                  | .      | . |
| Vv19g0034    | . | .                  | . | Gorai.007G331700.1 | .                  | Gorai. | . |
| 002G046400.1 | . | .                  | . | .                  | .                  | .      | . |
| .            | . | .                  | . | .                  | .                  | .      | . |
| .            | . | .                  | . | .                  | .                  | .      | . |
| Vv19g0035    | . | .                  | . | .                  | .                  | .      | . |
| .            | . | .                  | . | .                  | .                  | .      | . |
| .            | . | .                  | . | .                  | .                  | .      | . |
| Vv19g0036    | . | .                  | . | .                  | .                  | Gorai. | . |
| 004G271300.1 | . | .                  | . | .                  | .                  | .      | . |
| .            | . | .                  | . | .                  | .                  | .      | . |
| .            | . | .                  | . | .                  | .                  | .      | . |
| Vv19g0037    | . | .                  | . | Gorai.002G047000.1 | .                  | .      | . |
| .            | . | .                  | . | .                  | .                  | .      | . |
| .            | . | .                  | . | .                  | .                  | .      | . |
| Vv19g0038    | . | .                  | . | Gorai.002G047100.1 | .                  | .      | . |

|                    |                    |   |   |                    |   |   |   |
|--------------------|--------------------|---|---|--------------------|---|---|---|
| .                  | .                  | . | . | .                  | . | . | . |
| .                  | .                  | . | . | .                  | . | . | . |
| Vv19g0039          | .                  | . | . | Gorai.002G047200.1 | . | . | . |
|                    | Gorai.004G271600.1 | . | . | .                  | . | . | . |
| .                  | .                  | . | . | .                  | . | . | . |
| Vv19g0040          | .                  | . | . | .                  | . | . | . |
| .                  | .                  | . | . | .                  | . | . | . |
| Vv19g0041          | .                  | . | . | .                  | . | . | . |
| .                  | .                  | . | . | .                  | . | . | . |
| Vv19g0042          | .                  | . | . | .                  | . | . | . |
| .                  | .                  | . | . | .                  | . | . | . |
| Vv19g0043          | .                  | . | . | .                  | . | . | . |
| .                  | .                  | . | . | .                  | . | . | . |
| Vv19g0044          | Tc07_g010830       | . | . | Gorai.013G175400.1 | . | . | . |
| Gorai.002G048000.1 | .                  | . | . | .                  | . | . | . |
| .                  | .                  | . | . | .                  | . | . | . |
| Vv19g0045          | Tc07_g010820       | . | . | .                  | . | . | . |
| .                  | .                  | . | . | .                  | . | . | . |
| Vv19g0046          | Tc07_g010800       | . | . | .                  | . | . | . |
| .                  | .                  | . | . | .                  | . | . | . |
| Vv19g0047          | .                  | . | . | .                  | . | . | . |
| .                  | .                  | . | . | .                  | . | . | . |
| Vv19g0048          | Tc07_g010790       | . | . | .                  | . | . | . |
| .                  | .                  | . | . | .                  | . | . | . |
| Vv19g0049          | Tc07_g010780       | . | . | Gorai.013G175200.1 | . | . | . |
| .                  | .                  | . | . | .                  | . | . | . |
| Vv19g0050          | .                  | . | . | .                  | . | . | . |
| .                  | .                  | . | . | .                  | . | . | . |
| Vv19g0051          | Tc07_g010770       | . | . | .                  | . | . | . |
| .                  | .                  | . | . | .                  | . | . | . |
| Vv19g0052          | .                  | . | . | .                  | . | . | . |
| .                  | .                  | . | . | .                  | . | . | . |
| Vv19g0053          | .                  | . | . | .                  | . | . | . |
| .                  | .                  | . | . | .                  | . | . | . |
| Vv19g0054          | .                  | . | . | .                  | . | . | . |

|           |              |   |   |   |   |   |   |
|-----------|--------------|---|---|---|---|---|---|
| .         | .            | . | . | . | . | . | . |
| .         | .            | . | . | . | . | . | . |
| Vv19g0055 | .            | . | . | . | . | . | . |
| .         | .            | . | . | . | . | . | . |
| Vv19g0056 | .            | . | . | . | . | . | . |
| .         | .            | . | . | . | . | . | . |
| Vv19g0057 | .            | . | . | . | . | . | . |
| .         | .            | . | . | . | . | . | . |
| Vv19g0058 | .            | . | . | . | . | . | . |
| .         | .            | . | . | . | . | . | . |
| Vv19g0059 | .            | . | . | . | . | . | . |
| .         | .            | . | . | . | . | . | . |
| Vv19g0060 | .            | . | . | . | . | . | . |
| .         | .            | . | . | . | . | . | . |
| Vv19g0061 | .            | . | . | . | . | . | . |
| .         | .            | . | . | . | . | . | . |
| Vv19g0062 | .            | . | . | . | . | . | . |
| .         | .            | . | . | . | . | . | . |
| Vv19g0063 | .            | . | . | . | . | . | . |
| .         | .            | . | . | . | . | . | . |
| Vv19g0064 | .            | . | . | . | . | . | . |
| .         | .            | . | . | . | . | . | . |
| Vv19g0065 | .            | . | . | . | . | . | . |
| .         | .            | . | . | . | . | . | . |
| Vv19g0066 | Tc07_g010730 | . | . | . | . | . | . |
| .         | .            | . | . | . | . | . | . |
| Vv19g0067 | .            | . | . | . | . | . | . |
| .         | .            | . | . | . | . | . | . |
| Vv19g0068 | Tc07_g010720 | . | . | . | . | . | . |
| .         | .            | . | . | . | . | . | . |
| Vv19g0069 | .            | . | . | . | . | . | . |
| .         | .            | . | . | . | . | . | . |
| Vv19g0070 | Tc07_g010700 | . | . | . | . | . | . |
| .         | .            | . | . | . | . | . | . |
| .         | .            | . | . | . | . | . | . |

|           |                    |                    |   |   |                    |   |
|-----------|--------------------|--------------------|---|---|--------------------|---|
| Vv19g0071 | Tc07_g010690       | .                  | . | . | .                  | . |
| .         | .                  | .                  | . | . | .                  | . |
| Vv19g0072 | .                  | .                  | . | . | .                  | . |
| .         | .                  | .                  | . | . | .                  | . |
| Vv19g0073 | .                  | .                  | . | . | .                  | . |
| .         | .                  | .                  | . | . | .                  | . |
| Vv19g0074 | .                  | .                  | . | . | .                  | . |
| .         | .                  | .                  | . | . | .                  | . |
| Vv19g0075 | Tc07_g010680       | .                  | . | . | .                  | . |
| .         | .                  | .                  | . | . | .                  | . |
| Vv19g0076 | .                  | .                  | . | . | .                  | . |
| .         | .                  | .                  | . | . | .                  | . |
| Vv19g0077 | Tc07_g010630       | .                  | . | . | .                  | . |
| .         | .                  | .                  | . | . | .                  | . |
| Vv19g0078 | .                  | .                  | . | . | .                  | . |
| .         | .                  | .                  | . | . | .                  | . |
| Vv19g0079 | .                  | .                  | . | . | .                  | . |
| .         | .                  | .                  | . | . | .                  | . |
| Vv19g0080 | .                  | .                  | . | . | .                  | . |
| .         | .                  | .                  | . | . | .                  | . |
| Vv19g0081 | Tc07_g010590       | .                  | . | . | .                  | . |
| .         | .                  | .                  | . | . | .                  | . |
| Vv19g0082 | .                  | .                  | . | . | .                  | . |
| .         | .                  | .                  | . | . | .                  | . |
| Vv19g0083 | .                  | .                  | . | . | .                  | . |
| .         | .                  | .                  | . | . | .                  | . |
| Vv19g0084 | .                  | .                  | . | . | .                  | . |
| .         | .                  | .                  | . | . | .                  | . |
| Vv19g0085 | .                  | .                  | . | . | .                  | . |
| .         | .                  | .                  | . | . | .                  | . |
| Vv19g0086 | .                  | .                  | . | . | .                  | . |
| Vv10g0199 | .                  | .                  | . | . | Gorai.011G035700.1 | . |
| .         | Gorai.010G240300.1 | .                  | . | . | .                  | . |
| Vv19g0087 | .                  | Gorai.013G174200.1 | . | . | Gorai.             | . |

|                    |                    |   |                    |                    |   |   |   |
|--------------------|--------------------|---|--------------------|--------------------|---|---|---|
| 002G053300.1       | .                  | . | .                  | .                  | . | . | . |
| .                  | .                  | . | .                  | .                  | . | . | . |
| .                  | .                  | . | .                  | .                  | . | . | . |
| Vv19g0088          | .                  | . | .                  | Gorai.002G052500.1 | . | . | . |
| .                  | Vv10g0195          | . | .                  | .                  | . | . | . |
| Gorai.011G036200.1 | Gorai.010G240600.1 | . | .                  | .                  | . | . | . |
| .                  | .                  | . | .                  | .                  | . | . | . |
| Vv19g0089          | .                  | . | .                  | Gorai.002G052400.1 | . | . | . |
| .                  | Vv10g0194          | . | .                  | .                  | . | . | . |
| Gorai.011G036300.1 | Gorai.010G240700.1 | . | .                  | .                  | . | . | . |
| .                  | .                  | . | .                  | .                  | . | . | . |
| Vv19g0090          | Tc07_g003420       | . | .                  | .                  | . | . | . |
| .                  | .                  | . | .                  | .                  | . | . | . |
| .                  | .                  | . | .                  | .                  | . | . | . |
| Vv19g0091          | .                  | . | .                  | .                  | . | . | . |
| .                  | .                  | . | .                  | .                  | . | . | . |
| .                  | .                  | . | .                  | .                  | . | . | . |
| Vv19g0092          | .                  | . | .                  | .                  | . | . | . |
| .                  | .                  | . | .                  | .                  | . | . | . |
| .                  | .                  | . | .                  | .                  | . | . | . |
| Vv19g0093          | .                  | . | .                  | .                  | . | . | . |
| .                  | .                  | . | .                  | .                  | . | . | . |
| .                  | .                  | . | .                  | .                  | . | . | . |
| Vv19g0094          | .                  | . | .                  | .                  | . | . | . |
| .                  | .                  | . | .                  | .                  | . | . | . |
| .                  | .                  | . | .                  | .                  | . | . | . |
| Vv19g0095          | .                  | . | .                  | .                  | . | . | . |
| .                  | .                  | . | .                  | .                  | . | . | . |
| .                  | .                  | . | .                  | .                  | . | . | . |
| Vv19g0096          | Tc07_g004180       | . | .                  | .                  | . | . | . |
| .                  | .                  | . | .                  | .                  | . | . | . |
| .                  | .                  | . | .                  | .                  | . | . | . |
| Vv19g0097          | Tc07_g004190       | . | .                  | .                  | . | . | . |
| .                  | .                  | . | .                  | .                  | . | . | . |
| .                  | .                  | . | .                  | .                  | . | . | . |
| Vv19g0098          | Tc07_g004200       | . | .                  | .                  | . | . | . |
| .                  | .                  | . | .                  | .                  | . | . | . |
| .                  | .                  | . | .                  | .                  | . | . | . |
| Vv19g0099          | Tc07_g004210       | . | .                  | .                  | . | . | . |
| .                  | .                  | . | .                  | .                  | . | . | . |
| .                  | .                  | . | .                  | .                  | . | . | . |
| Vv19g0100          | Tc07_g004300       | . | .                  | .                  | . | . | . |
| .                  | .                  | . | .                  | .                  | . | . | . |
| .                  | .                  | . | .                  | .                  | . | . | . |
| Vv19g0101          | .                  | . | Gorai.007G327100.1 | .                  | . | . | . |
| .                  | .                  | . | .                  | .                  | . | . | . |
| .                  | .                  | . | .                  | .                  | . | . | . |
| Vv19g0102          | .                  | . | .                  | .                  | . | . | . |
| .                  | .                  | . | .                  | .                  | . | . | . |
| .                  | .                  | . | .                  | .                  | . | . | . |



|              |                    |   |   |                    |
|--------------|--------------------|---|---|--------------------|
| Vv19g0103    | Tc07_g010250       | . | . | Gorai.002G051200.1 |
| .            | .                  | . | . | .                  |
| .            | .                  | . | . | .                  |
| Vv19g0104    | .                  | . | . | Gorai.002G051000.1 |
| .            | .                  | . | . | .                  |
| .            | .                  | . | . | .                  |
| Vv19g0105    | .                  | . | . | Gorai.002G050900.1 |
| .            | Vv10g0186          | . | . | Gorai.             |
| 009G160000.1 | Gorai.011G036700.1 | . | . | .                  |
| .            | .                  | . | . | .                  |
| Vv19g0106    | .                  | . | . | Gorai.009G366600.1 |
| .            | .                  | . | . | .                  |
| .            | .                  | . | . | .                  |
| Vv19g0107    | .                  | . | . | Gorai.002G050300.1 |
| .            | .                  | . | . | .                  |
| .            | .                  | . | . | .                  |
| Vv19g0108    | .                  | . | . | .                  |
| .            | .                  | . | . | .                  |
| .            | .                  | . | . | .                  |
| Vv19g0109    | .                  | . | . | Gorai.002G050200.1 |
| .            | Vv10g0184          | . | . | Gorai.             |
| 009G160300.1 | Gorai.011G036900.1 | . | . | Gorai.010G241100.1 |
| .            | .                  | . | . | .                  |
| Vv19g0110    | .                  | . | . | .                  |
| .            | .                  | . | . | .                  |
| .            | .                  | . | . | .                  |
| Vv19g0111    | Tc07_g016390       | . | . | .                  |
| .            | .                  | . | . | .                  |
| .            | .                  | . | . | .                  |
| Vv19g0112    | Tc07_g016360       | . | . | .                  |
| .            | .                  | . | . | .                  |
| .            | .                  | . | . | .                  |
| Vv19g0113    | .                  | . | . | .                  |
| .            | .                  | . | . | .                  |
| .            | .                  | . | . | .                  |
| Vv19g0114    | .                  | . | . | .                  |
| .            | .                  | . | . | .                  |
| .            | .                  | . | . | .                  |
| Vv19g0115    | .                  | . | . | .                  |
| .            | .                  | . | . | .                  |
| .            | .                  | . | . | .                  |
| Vv19g0116    | Tc07_g003310       | . | . | .                  |
| .            | .                  | . | . | .                  |
| .            | .                  | . | . | .                  |
| Vv19g0117    | .                  | . | . | .                  |
| .            | .                  | . | . | .                  |
| .            | .                  | . | . | .                  |
| Vv19g0118    | .                  | . | . | Gorai.002G047200.1 |
| .            | .                  | . | . | .                  |
| .            | .                  | . | . | .                  |

|              |              |   |   |   |   |                    |   |
|--------------|--------------|---|---|---|---|--------------------|---|
| Vv19g0119    | .            | . | . | . | . | .                  | . |
| .            | .            | . | . | . | . | .                  | . |
| Vv19g0120    | .            | . | . | . | . | .                  | . |
| .            | .            | . | . | . | . | .                  | . |
| Vv19g0121    | .            | . | . | . | . | .                  | . |
| .            | .            | . | . | . | . | .                  | . |
| Vv19g0122    | .            | . | . | . | . | .                  | . |
| .            | .            | . | . | . | . | .                  | . |
| Vv19g0123    | .            | . | . | . | . | .                  | . |
| .            | .            | . | . | . | . | .                  | . |
| Vv19g0124    | .            | . | . | . | . | .                  | . |
| .            | .            | . | . | . | . | .                  | . |
| Vv19g0125    | .            | . | . | . | . | .                  | . |
| .            | .            | . | . | . | . | .                  | . |
| Vv19g0126    | .            | . | . | . | . | .                  | . |
| Vv10g0154    | Tc06_g014210 | . | . | . | . | Gorai.             | . |
| 011G038900.1 | .            | . | . | . | . | .                  | . |
| .            | .            | . | . | . | . | .                  | . |
| Vv19g0127    | .            | . | . | . | . | .                  | . |
| .            | .            | . | . | . | . | .                  | . |
| Vv19g0128    | .            | . | . | . | . | .                  | . |
| .            | .            | . | . | . | . | .                  | . |
| Vv19g0129    | .            | . | . | . | . | Gorai.009G367200.1 | . |
| .            | .            | . | . | . | . | .                  | . |
| Vv19g0130    | .            | . | . | . | . | Gorai.009G367300.1 | . |
| .            | Vv12g0203    | . | . | . | . | .                  | . |
| Vv19g0131    | .            | . | . | . | . | .                  | . |
| .            | .            | . | . | . | . | .                  | . |
| Vv19g0132    | .            | . | . | . | . | .                  | . |
| .            | .            | . | . | . | . | .                  | . |
| Vv19g0133    | .            | . | . | . | . | .                  | . |
| .            | .            | . | . | . | . | .                  | . |
| Vv19g0134    | .            | . | . | . | . | .                  | . |
| .            | .            | . | . | . | . | .                  | . |
| Vv19g0135    | Tc07_g009780 | . | . | . | . | .                  | . |

|              |                    |                    |                    |                    |   |   |   |
|--------------|--------------------|--------------------|--------------------|--------------------|---|---|---|
| .            | .                  | .                  | .                  | .                  | . | . | . |
| .            | .                  | .                  | .                  | .                  | . | . | . |
| Vv19g0136    | .                  | .                  | .                  | .                  | . | . | . |
| .            | .                  | .                  | .                  | .                  | . | . | . |
| Vv19g0137    | .                  | Gorai.013G173800.1 | .                  | Gorai.007G326900.1 | . | . | . |
|              | Gorai.002G060900.1 | .                  | .                  | .                  | . | . | . |
| .            | .                  | .                  | .                  | .                  | . | . | . |
| Vv19g0138    | .                  | .                  | .                  | Gorai.009G367900.1 | . | . | . |
| .            | .                  | .                  | .                  | .                  | . | . | . |
| Vv19g0139    | .                  | .                  | .                  | .                  | . | . | . |
| .            | .                  | .                  | .                  | .                  | . | . | . |
| Vv19g0140    | .                  | .                  | .                  | .                  | . | . | . |
| .            | .                  | .                  | .                  | .                  | . | . | . |
| Vv19g0141    | .                  | .                  | .                  | .                  | . | . | . |
| .            | .                  | .                  | .                  | .                  | . | . | . |
| Vv19g0142    | .                  | .                  | .                  | .                  | . | . | . |
| .            | .                  | .                  | .                  | .                  | . | . | . |
| Vv19g0143    | .                  | Gorai.013G173500.1 | .                  | Gorai.             | . | . | . |
| 002G061400.1 | .                  | Vv12g0219          | .                  | .                  | . | . | . |
| .            | .                  | .                  | .                  | .                  | . | . | . |
| Vv19g0144    | .                  | .                  | .                  | .                  | . | . | . |
| .            | .                  | .                  | .                  | .                  | . | . | . |
| Vv19g0145    | .                  | Gorai.013G173400.1 | .                  | .                  | . | . | . |
| .            | .                  | .                  | .                  | .                  | . | . | . |
| Vv19g0146    | .                  | .                  | .                  | .                  | . | . | . |
|              | Tc06_g014420       | .                  | Gorai.009G162800.1 | Vv10g0134          | . | . | . |
| .            | .                  | .                  | .                  | .                  | . | . | . |
| Vv19g0147    | Tc07_g009540       | Gorai.013G173300.1 | .                  | .                  | . | . | . |
| .            | .                  | .                  | .                  | .                  | . | . | . |
| Vv19g0148    | .                  | .                  | .                  | .                  | . | . | . |
| .            | .                  | .                  | .                  | .                  | . | . | . |
| Vv19g0149    | .                  | .                  | .                  | .                  | . | . | . |
| .            | .                  | .                  | .                  | .                  | . | . | . |
| Vv19g0150    | .                  | Gorai.013G173200.1 | Gorai.007G326600.1 | .                  | . | . | . |
|              | Gorai.002G061700.1 | Gorai.009G368300.1 | .                  | .                  | . | . | . |
| Vv12g0224    | Tc01_g001340       | .                  | Gorai.007G192200.1 | .                  | . | . | . |

|                    |                    |                    |   |                    |   |   |   |
|--------------------|--------------------|--------------------|---|--------------------|---|---|---|
| .                  | .                  | .                  | . | .                  | . | . | . |
| .                  | .                  | .                  | . | .                  | . | . | . |
| Vv19g0151          | .                  | .                  | . | .                  | . | . | . |
| .                  | .                  | .                  | . | .                  | . | . | . |
| Vv19g0152          | .                  | .                  | . | Gorai.002G061800.1 | . | . | . |
| .                  | .                  | .                  | . | .                  | . | . | . |
| Vv19g0153          | .                  | .                  | . | .                  | . | . | . |
| .                  | .                  | .                  | . | .                  | . | . | . |
| Vv19g0154          | Tc07_g003130       | .                  | . | Gorai.002G062000.1 | . | . | . |
|                    | Gorai.009G368400.1 | .                  | . | .                  | . | . | . |
| .                  | .                  | .                  | . | .                  | . | . | . |
| Vv19g0155          | .                  | Gorai.013G173100.1 | . | Gorai.007G326300.1 | . | . | . |
| .                  | .                  | .                  | . | .                  | . | . | . |
| .                  | .                  | .                  | . | .                  | . | . | . |
| Vv19g0156          | .                  | .                  | . | Gorai.002G062300.1 | . | . | . |
| Gorai.009G368600.1 | .                  | .                  | . | .                  | . | . | . |
| .                  | .                  | .                  | . | .                  | . | . | . |
| Vv19g0157          | .                  | .                  | . | .                  | . | . | . |
| .                  | .                  | .                  | . | .                  | . | . | . |
| Vv19g0158          | .                  | .                  | . | .                  | . | . | . |
| .                  | .                  | .                  | . | .                  | . | . | . |
| Vv19g0159          | .                  | .                  | . | Gorai.002G062600.1 | . | . | . |
| Gorai.009G369000.1 | .                  | .                  | . | .                  | . | . | . |
| .                  | .                  | .                  | . | .                  | . | . | . |
| Vv19g0160          | .                  | Gorai.013G173000.1 | . | .                  | . | . | . |
| .                  | .                  | .                  | . | .                  | . | . | . |
| .                  | .                  | .                  | . | .                  | . | . | . |
| Vv19g0161          | Tc07_g009420       | .                  | . | Gorai.             | . | . | . |
| 009G371500.1       | .                  | .                  | . | .                  | . | . | . |
| .                  | .                  | .                  | . | .                  | . | . | . |
| Vv19g0162          | Tc07_g009410       | .                  | . | Gorai.007G325900.1 | . | . | . |
| .                  | .                  | .                  | . | .                  | . | . | . |
| Vv19g0163          | .                  | .                  | . | .                  | . | . | . |
| .                  | .                  | .                  | . | .                  | . | . | . |
| Vv19g0164          | Tc07_g009400       | .                  | . | .                  | . | . | . |
| Vv12g0246          | Tc01_g013490       | .                  | . | .                  | . | . | . |
| .                  | Vv10g0119          | Tc06_g014600       | . | Gorai.006G088800.1 | . | . | . |
| .                  | Gorai.011G033800.1 | .                  | . | Gorai.010G242200.1 | . | . | . |
| Vv19g0165          | .                  | .                  | . | .                  | . | . | . |

|                    |                    |                    |                    |   |   |                    |   |
|--------------------|--------------------|--------------------|--------------------|---|---|--------------------|---|
| .                  | .                  | .                  | .                  | . | . | .                  | . |
| .                  | .                  | .                  | .                  | . | . | .                  | . |
| Vv19g0166          | Tc07_g009390       | .                  | .                  | . | . | Gorai.             | . |
| 009G372500.1       | .                  | .                  | .                  | . | . | .                  | . |
| .                  | .                  | .                  | .                  | . | . | .                  | . |
| Vv19g0167          | Tc07_g009370       | .                  | .                  | . | . | Gorai.002G063300.1 | . |
| Gorai.009G372600.1 | .                  | Gorai.004G030200.1 | .                  | . | . | .                  | . |
| .                  | .                  | .                  | .                  | . | . | Vv10g0109          | . |
| Tc06_g014720       | .                  | .                  | .                  | . | . | .                  | . |
| Vv19g0168          | Tc07_g009360       | .                  | .                  | . | . | Gorai.002G063500.1 | . |
| Gorai.009G372700.1 | .                  | .                  | Vv12g0253          | . | . | .                  | . |
| .                  | .                  | .                  | .                  | . | . | .                  | . |
| .                  | .                  | .                  | .                  | . | . | .                  | . |
| Vv19g0169          | .                  | .                  | .                  | . | . | .                  | . |
| .                  | .                  | .                  | .                  | . | . | .                  | . |
| .                  | .                  | .                  | .                  | . | . | .                  | . |
| Vv19g0170          | Tc07_g009300       | .                  | .                  | . | . | Gorai.002G064400.1 | . |
| .                  | .                  | .                  | .                  | . | . | .                  | . |
| .                  | .                  | .                  | .                  | . | . | .                  | . |
| Vv19g0171          | Tc07_g009290       | Gorai.013G172800.1 | .                  | . | . | .                  | . |
| Gorai.002G064500.1 | Gorai.009G373000.1 | .                  | .                  | . | . | Vv12g0255          | . |
| .                  | .                  | .                  | .                  | . | . | Vv10g0090          | . |
| .                  | .                  | .                  | .                  | . | . | .                  | . |
| Vv19g0172          | Tc07_g009280       | .                  | .                  | . | . | Gorai.002G064600.1 | . |
| .                  | .                  | .                  | .                  | . | . | .                  | . |
| .                  | Vv10g0089          | Tc06_g014860       | .                  | . | . | .                  | . |
| Gorai.009G164700.1 | Gorai.011G032700.1 | .                  | .                  | . | . | .                  | . |
| Vv19g0173          | Tc07_g009270       | .                  | .                  | . | . | Gorai.002G064700.1 | . |
| .                  | Gorai.004G029900.1 | .                  | .                  | . | . | .                  | . |
| .                  | .                  | Vv10g0088          | .                  | . | . | .                  | . |
| .                  | .                  | .                  | .                  | . | . | .                  | . |
| Vv19g0174          | Tc07_g009260       | .                  | Gorai.007G325800.1 | . | . | .                  | . |
| .                  | Vv12g0258          | .                  | .                  | . | . | .                  | . |
| .                  | .                  | .                  | .                  | . | . | .                  | . |
| .                  | .                  | .                  | .                  | . | . | .                  | . |
| Vv19g0175          | Tc07_g009250       | .                  | .                  | . | . | Gorai.002G064800.1 | . |
| .                  | Vv12g0259          | .                  | .                  | . | . | .                  | . |
| .                  | Vv10g0087          | Tc06_g014890       | .                  | . | . | .                  | . |
| .                  | .                  | .                  | .                  | . | . | .                  | . |
| .                  | .                  | .                  | .                  | . | . | .                  | . |
| Vv19g0176          | Tc07_g009230       | .                  | .                  | . | . | .                  | . |
| .                  | .                  | .                  | .                  | . | . | .                  | . |
| Vv10g0085          | .                  | .                  | .                  | . | . | Gorai.011G032200.1 | . |
| .                  | .                  | .                  | .                  | . | . | .                  | . |
| Vv19g0177          | .                  | .                  | .                  | . | . | .                  | . |
| Vv12g0260          | .                  | .                  | .                  | . | . | .                  | . |
| .                  | .                  | .                  | .                  | . | . | .                  | . |
| Vv19g0178          | Tc07_g009220       | .                  | .                  | . | . | .                  | . |
| .                  | .                  | .                  | .                  | . | . | .                  | . |
| Vv10g0084          | Tc06_g014910       | .                  | .                  | . | . | .                  | . |
| Vv19g0179          | .                  | .                  | .                  | . | . | .                  | . |

|                    |                    |                    |                    |   |                    |           |
|--------------------|--------------------|--------------------|--------------------|---|--------------------|-----------|
| .                  | .                  | .                  | .                  | . | .                  | Vv10g0082 |
| .                  | .                  | .                  | .                  | . | Gorai.011G032000.1 | .         |
| Vv19g0180          | .                  | .                  | .                  | . | .                  | .         |
| .                  | .                  | .                  | .                  | . | .                  | .         |
| Vv19g0181          | .                  | .                  | .                  | . | .                  | .         |
| .                  | .                  | .                  | .                  | . | .                  | Vv10g0081 |
| Tc06_g014920       | .                  | .                  | .                  | . | Gorai.009G164900.1 | .         |
| Gorai.011G031900.1 | .                  | .                  | .                  | . | .                  | .         |
| Vv19g0182          | Tc07_g009200       | .                  | Gorai.013G172500.1 | . | Gorai.             | .         |
| 007G325700.1       | Gorai.002G064900.1 | .                  | .                  | . | Vv12g0265          | .         |
| .                  | .                  | .                  | .                  | . | .                  | .         |
| .                  | .                  | .                  | .                  | . | .                  | .         |
| Vv19g0183          | .                  | .                  | .                  | . | .                  | .         |
| Vv10g0076          | .                  | .                  | .                  | . | Gorai.011G031800.1 | .         |
| Gorai.010G242700.1 | .                  | .                  | .                  | . | .                  | .         |
| .                  | .                  | .                  | .                  | . | .                  | .         |
| Vv19g0184          | Tc07_g009190       | .                  | .                  | . | Gorai.002G065000.1 | .         |
| .                  | .                  | .                  | .                  | . | .                  | .         |
| .                  | .                  | .                  | .                  | . | .                  | .         |
| Vv19g0185          | Tc07_g009160       | .                  | .                  | . | Gorai.             | .         |
| 009G374700.1       | .                  | .                  | .                  | . | .                  | .         |
| .                  | .                  | .                  | .                  | . | .                  | .         |
| Vv19g0186          | Tc07_g009140       | .                  | .                  | . | Gorai.002G065100.1 | .         |
| .                  | .                  | .                  | .                  | . | .                  | .         |
| .                  | .                  | .                  | .                  | . | .                  | .         |
| Vv19g0187          | .                  | .                  | .                  | . | .                  | .         |
| .                  | .                  | .                  | .                  | . | .                  | .         |
| .                  | .                  | .                  | .                  | . | .                  | .         |
| Vv19g0188          | Tc07_g008990       | .                  | Gorai.013G172300.1 | . | Gorai.             | .         |
| 007G325600.1       | Gorai.002G065600.1 | .                  | .                  | . | .                  | .         |
| .                  | .                  | .                  | .                  | . | .                  | .         |
| .                  | .                  | .                  | .                  | . | .                  | .         |
| Vv19g0189          | Tc07_g008970       | .                  | Gorai.013G172100.1 | . | .                  | .         |
| .                  | .                  | .                  | .                  | . | .                  | .         |
| .                  | .                  | .                  | .                  | . | .                  | .         |
| Vv19g0190          | .                  | .                  | .                  | . | .                  | .         |
| .                  | .                  | .                  | .                  | . | .                  | .         |
| .                  | .                  | .                  | .                  | . | .                  | .         |
| Vv19g0191          | Tc07_g008960       | .                  | .                  | . | Gorai.002G065800.1 | .         |
| .                  | .                  | .                  | .                  | . | .                  | .         |
| .                  | .                  | .                  | .                  | . | .                  | .         |
| Vv19g0192          | Tc07_g008950       | .                  | .                  | . | Gorai.002G065900.1 | .         |
| .                  | .                  | .                  | .                  | . | .                  | .         |
| .                  | .                  | .                  | .                  | . | .                  | .         |
| Vv19g0193          | .                  | Gorai.013G172000.1 | .                  | . | Gorai.             | .         |
| 002G066000.1       | .                  | .                  | .                  | . | .                  | .         |
| .                  | .                  | .                  | .                  | . | .                  | .         |
| .                  | .                  | .                  | .                  | . | .                  | .         |
| Vv19g0194          | Tc07_g008940       | .                  | .                  | . | Gorai.002G066100.1 | .         |

|                    |                    |                    |              |   |   |   |   |
|--------------------|--------------------|--------------------|--------------|---|---|---|---|
| .                  | .                  | .                  | .            | . | . | . | . |
| .                  | .                  | .                  | .            | . | . | . | . |
| Vv19g0195          | .                  | .                  | .            | . | . | . | . |
| .                  | .                  | .                  | .            | . | . | . | . |
| Vv19g0196          | .                  | .                  | .            | . | . | . | . |
| .                  | .                  | .                  | .            | . | . | . | . |
| Vv19g0197          | .                  | .                  | .            | . | . | . | . |
| .                  | .                  | .                  | .            | . | . | . | . |
| Vv19g0198          | Tc07_g008930       | Gorai.013G171900.1 | .            | . | . | . | . |
| Gorai.002G066200.1 | .                  | Gorai.004G029800.1 | .            | . | . | . | . |
| .                  | .                  | .                  | .            | . | . | . | . |
| Vv19g0199          | Tc07_g008870       | Gorai.013G171700.1 | .            | . | . | . | . |
| .                  | .                  | Vv10g0049          | Tc06_g015180 | . | . | . | . |
| .                  | .                  | Gorai.010G243400.1 | .            | . | . | . | . |
| .                  | .                  | .                  | .            | . | . | . | . |
| Vv19g0200          | Tc07_g008850       | Gorai.007G325500.1 | .            | . | . | . | . |
| Gorai.002G066400.1 | .                  | .                  | .            | . | . | . | . |
| .                  | .                  | .                  | .            | . | . | . | . |
| Vv19g0201          | Tc07_g008840       | Gorai.002G066500.1 | .            | . | . | . | . |
| .                  | .                  | .                  | .            | . | . | . | . |
| Vv19g0202          | Tc07_g008830       | Gorai.002G066600.1 | .            | . | . | . | . |
| .                  | .                  | .                  | .            | . | . | . | . |
| Vv19g0203          | .                  | .                  | .            | . | . | . | . |
| .                  | .                  | .                  | .            | . | . | . | . |
| Vv19g0204          | .                  | .                  | .            | . | . | . | . |
| .                  | .                  | .                  | .            | . | . | . | . |
| Vv19g0205          | .                  | .                  | .            | . | . | . | . |
| .                  | .                  | .                  | .            | . | . | . | . |
| Vv19g0206          | .                  | .                  | .            | . | . | . | . |
| .                  | .                  | .                  | .            | . | . | . | . |
| Vv19g0207          | .                  | .                  | .            | . | . | . | . |
| .                  | .                  | .                  | .            | . | . | . | . |
| Vv19g0208          | .                  | .                  | .            | . | . | . | . |
| .                  | .                  | .                  | .            | . | . | . | . |
| Vv19g0209          | Tc07_g008810       | Gorai.002G066800.1 | .            | . | . | . | . |
| .                  | Gorai.004G029700.1 | .                  | .            | . | . | . | . |
| .                  | .                  | .                  | .            | . | . | . | . |

|                    |                    |                    |   |   |                    |   |   |
|--------------------|--------------------|--------------------|---|---|--------------------|---|---|
| Vv19g0210          | .                  | .                  | . | . | .                  | . | . |
| .                  | .                  | .                  | . | . | .                  | . | . |
| Vv19g0211          | Tc07_g008800       | .                  | . | . | Gorai.002G066900.1 | . | . |
| .                  | .                  | .                  | . | . | .                  | . | . |
| Vv19g0212          | Tc07_g008790       | .                  | . | . | Gorai.002G067000.1 | . | . |
| .                  | .                  | .                  | . | . | .                  | . | . |
| Vv19g0213          | Tc07_g008780       | .                  | . | . | Gorai.002G067100.1 | . | . |
| .                  | .                  | .                  | . | . | .                  | . | . |
| Vv19g0214          | .                  | .                  | . | . | .                  | . | . |
| .                  | .                  | .                  | . | . | .                  | . | . |
| Vv19g0215          | .                  | .                  | . | . | .                  | . | . |
| .                  | .                  | .                  | . | . | .                  | . | . |
| Vv19g0216          | .                  | .                  | . | . | .                  | . | . |
| Vv10g0027          | .                  | .                  | . | . | .                  | . | . |
| .                  | .                  | .                  | . | . | .                  | . | . |
| Vv19g0217          | .                  | .                  | . | . | .                  | . | . |
| .                  | .                  | .                  | . | . | .                  | . | . |
| Vv19g0218          | Tc07_g008680       | .                  | . | . | Gorai.             | . | . |
| 009G375000.1       | .                  | .                  | . | . | .                  | . | . |
| .                  | .                  | .                  | . | . | .                  | . | . |
| Vv19g0219          | Tc07_g008670       | Gorai.013G171600.1 | . | . | .                  | . | . |
| .                  | Vv12g0329          | .                  | . | . | .                  | . | . |
| .                  | .                  | .                  | . | . | .                  | . | . |
| Vv19g0220          | Tc07_g008660       | Gorai.013G171300.1 | . | . | .                  | . | . |
| Gorai.002G067300.1 | .                  | .                  | . | . | .                  | . | . |
| .                  | .                  | .                  | . | . | .                  | . | . |
| .                  | .                  | .                  | . | . | .                  | . | . |
| Vv19g0221          | Tc07_g008580       | .                  | . | . | Gorai.             | . | . |
| 009G375500.1       | .                  | .                  | . | . | .                  | . | . |
| .                  | .                  | .                  | . | . | .                  | . | . |
| Vv19g0222          | .                  | .                  | . | . | .                  | . | . |
| .                  | .                  | .                  | . | . | .                  | . | . |
| .                  | .                  | .                  | . | . | .                  | . | . |
| Vv19g0223          | Tc07_g008570       | .                  | . | . | Gorai.             | . | . |
| 009G375600.1       | .                  | .                  | . | . | .                  | . | . |
| .                  | .                  | .                  | . | . | .                  | . | . |
| Vv19g0224          | .                  | .                  | . | . | .                  | . | . |
| .                  | .                  | .                  | . | . | .                  | . | . |
| .                  | .                  | .                  | . | . | .                  | . | . |
| Vv19g0225          | Tc07_g008490       | Gorai.007G322500.1 | . | . | .                  | . | . |
| Gorai.002G067700.1 | Gorai.009G375800.1 | .                  | . | . | .                  | . | . |



|                    |                    |                    |   |   |   |                    |   |
|--------------------|--------------------|--------------------|---|---|---|--------------------|---|
| .                  | .                  | .                  | . | . | . | .                  | . |
| .                  | .                  | .                  | . | . | . | .                  | . |
| Vv19g0226          | .                  | .                  | . | . | . | .                  | . |
| .                  | .                  | .                  | . | . | . | .                  | . |
| .                  | .                  | .                  | . | . | . | .                  | . |
| Vv19g0227          | Tc07_g008470       | .                  | . | . | . | Gorai.             | . |
| 009G375900.1       | .                  | .                  | . | . | . | .                  | . |
| .                  | .                  | .                  | . | . | . | .                  | . |
| Vv19g0228          | Tc07_g008460       | .                  | . | . | . | Gorai.             | . |
| 009G376000.1       | .                  | .                  | . | . | . | .                  | . |
| .                  | .                  | .                  | . | . | . | .                  | . |
| Vv19g0229          | Tc07_g008450       | .                  | . | . | . | Gorai.002G067900.1 | . |
| .                  | .                  | .                  | . | . | . | .                  | . |
| .                  | .                  | .                  | . | . | . | .                  | . |
| Vv19g0230          | .                  | .                  | . | . | . | Gorai.002G068000.1 | . |
| Gorai.009G379000.1 | .                  | .                  | . | . | . | .                  | . |
| .                  | .                  | .                  | . | . | . | .                  | . |
| .                  | .                  | .                  | . | . | . | .                  | . |
| Vv19g0231          | Tc07_g008430       | .                  | . | . | . | Gorai.002G068100.1 | . |
| .                  | .                  | .                  | . | . | . | .                  | . |
| .                  | .                  | .                  | . | . | . | .                  | . |
| Vv19g0232          | .                  | .                  | . | . | . | .                  | . |
| .                  | .                  | .                  | . | . | . | .                  | . |
| .                  | .                  | .                  | . | . | . | .                  | . |
| Vv19g0233          | Tc07_g008420       | .                  | . | . | . | Gorai.002G068200.1 | . |
| .                  | Vv12g0335          | .                  | . | . | . | Tc01_g000370       | . |
| .                  | Gorai.003G001500.1 | .                  | . | . | . | .                  | . |
| .                  | .                  | .                  | . | . | . | .                  | . |
| Vv19g0234          | Tc07_g008410       | .                  | . | . | . | Gorai.002G068300.1 | . |
| .                  | Vv12g0338          | .                  | . | . | . | Tc01_g000650       | . |
| .                  | Gorai.003G003200.1 | .                  | . | . | . | Vv10g0014          | . |
| Tc06_g015550       | .                  | .                  | . | . | . | Gorai.011G029400.1 | . |
| Vv19g0235          | Tc07_g008390       | .                  | . | . | . | Gorai.002G068500.1 | . |
| .                  | .                  | .                  | . | . | . | .                  | . |
| .                  | .                  | .                  | . | . | . | .                  | . |
| Vv19g0236          | Tc07_g008380       | .                  | . | . | . | Gorai.002G068600.1 | . |
| .                  | .                  | .                  | . | . | . | .                  | . |
| .                  | .                  | .                  | . | . | . | .                  | . |
| Vv19g0237          | .                  | .                  | . | . | . | .                  | . |
| .                  | .                  | .                  | . | . | . | .                  | . |
| .                  | .                  | .                  | . | . | . | .                  | . |
| Vv19g0238          | .                  | .                  | . | . | . | .                  | . |
| .                  | .                  | .                  | . | . | . | .                  | . |
| .                  | .                  | .                  | . | . | . | .                  | . |
| Vv19g0239          | .                  | .                  | . | . | . | .                  | . |
| .                  | .                  | .                  | . | . | . | .                  | . |
| .                  | .                  | .                  | . | . | . | .                  | . |
| Vv19g0240          | Tc07_g008210       | Gorai.013G169900.1 | . | . | . | .                  | . |
| Gorai.002G068800.1 | Gorai.009G381600.1 | .                  | . | . | . | .                  | . |
| .                  | .                  | .                  | . | . | . | .                  | . |
| .                  | .                  | .                  | . | . | . | .                  | . |

|                    |                    |   |   |                    |        |   |
|--------------------|--------------------|---|---|--------------------|--------|---|
| Vv19g0241          | Tc07_g008140       | . | . | .                  | .      | . |
| .                  | .                  | . | . | .                  | .      | . |
| Vv19g0242          | Tc07_g008120       | . | . | .                  | .      | . |
| .                  | .                  | . | . | .                  | .      | . |
| Vv19g0243          | .                  | . | . | .                  | .      | . |
| .                  | .                  | . | . | .                  | .      | . |
| Vv19g0244          | .                  | . | . | .                  | .      | . |
| .                  | .                  | . | . | .                  | .      | . |
| Vv19g0245          | Gorai.013G169100.1 | . | . | .                  | Gorai. | . |
| 002G069300.1       | Vv12g0351          | . | . | .                  | .      | . |
| .                  | .                  | . | . | .                  | .      | . |
| Vv19g0246          | .                  | . | . | Gorai.002G069400.1 | .      | . |
| Gorai.009G384400.1 | .                  | . | . | .                  | .      | . |
| .                  | Vv10g0005          | . | . | Tc06_g015670       | .      | . |
| Gorai.010G154500.1 | Gorai.009G168800.1 | . | . | .                  | Gorai. | . |
| 010G154500.1       | .                  | . | . | .                  | .      | . |
| Vv19g0247          | .                  | . | . | Gorai.002G069500.1 | .      | . |
| Gorai.009G384500.1 | .                  | . | . | .                  | .      | . |
| .                  | .                  | . | . | .                  | .      | . |
| Vv19g0248          | .                  | . | . | .                  | .      | . |
| .                  | .                  | . | . | .                  | .      | . |
| Vv19g0249          | .                  | . | . | .                  | .      | . |
| .                  | .                  | . | . | .                  | .      | . |
| Vv19g0250          | .                  | . | . | .                  | .      | . |
| .                  | .                  | . | . | .                  | .      | . |
| Vv19g0251          | .                  | . | . | .                  | .      | . |
| .                  | .                  | . | . | .                  | .      | . |
| Vv19g0252          | .                  | . | . | .                  | .      | . |
| .                  | .                  | . | . | .                  | .      | . |
| Vv19g0253          | .                  | . | . | .                  | .      | . |
| .                  | .                  | . | . | .                  | .      | . |
| Vv19g0254          | .                  | . | . | .                  | .      | . |
| .                  | .                  | . | . | .                  | .      | . |
| Vv19g0255          | .                  | . | . | .                  | .      | . |
| .                  | .                  | . | . | .                  | .      | . |
| .                  | .                  | . | . | .                  | .      | . |

|                    |                    |                    |                    |                    |        |   |   |
|--------------------|--------------------|--------------------|--------------------|--------------------|--------|---|---|
| Vv19g0256          | .                  | .                  | .                  | .                  | .      | . | . |
| .                  | .                  | .                  | .                  | .                  | .      | . | . |
| Vv19g0257          | .                  | .                  | .                  | .                  | .      | . | . |
| .                  | .                  | .                  | .                  | .                  | .      | . | . |
| Vv19g0258          | .                  | .                  | .                  | .                  | .      | . | . |
| .                  | .                  | .                  | .                  | .                  | .      | . | . |
| Vv19g0259          | .                  | Gorai.013G169000.1 | .                  | .                  | .      | . | . |
| .                  | .                  | .                  | .                  | .                  | .      | . | . |
| Vv19g0260          | Tc07_g007520       | .                  | .                  | .                  | .      | . | . |
| .                  | .                  | .                  | .                  | .                  | .      | . | . |
| Vv19g0261          | .                  | .                  | .                  | .                  | .      | . | . |
| .                  | .                  | .                  | .                  | .                  | .      | . | . |
| Vv19g0262          | .                  | Gorai.013G168900.1 | .                  | .                  | Gorai. | . | . |
| 002G069700.1       | Gorai.009G386800.1 | .                  | .                  | .                  | .      | . | . |
| .                  | .                  | .                  | .                  | .                  | .      | . | . |
| Vv19g0263          | .                  | Gorai.013G168800.1 | .                  | .                  | Gorai. | . | . |
| 002G069800.1       | .                  | .                  | .                  | .                  | .      | . | . |
| .                  | .                  | .                  | .                  | .                  | .      | . | . |
| Vv19g0264          | .                  | .                  | .                  | .                  | .      | . | . |
| .                  | .                  | .                  | .                  | .                  | .      | . | . |
| Vv19g0265          | .                  | .                  | .                  | .                  | .      | . | . |
| .                  | .                  | .                  | .                  | .                  | .      | . | . |
| Vv19g0266          | .                  | .                  | .                  | .                  | .      | . | . |
| .                  | .                  | .                  | .                  | .                  | .      | . | . |
| Vv19g0267          | .                  | .                  | .                  | .                  | .      | . | . |
| .                  | .                  | .                  | .                  | .                  | .      | . | . |
| Vv19g0268          | Tc07_g001440       | .                  | .                  | .                  | .      | . | . |
| .                  | .                  | .                  | .                  | .                  | .      | . | . |
| Vv19g0269          | .                  | Gorai.013G168400.1 | .                  | .                  | Gorai. | . | . |
| 002G069900.1       | Gorai.009G387900.1 | .                  | .                  | .                  | .      | . | . |
| .                  | .                  | .                  | .                  | .                  | .      | . | . |
| Vv19g0270          | .                  | .                  | Gorai.002G070000.1 | .                  | .      | . | . |
| Gorai.009G388000.1 | .                  | Vv12g0362          | .                  | .                  | .      | . | . |
| .                  | .                  | .                  | .                  | .                  | .      | . | . |
| Vv19g0271          | .                  | .                  | .                  | Gorai.009G388100.1 | .      | . | . |

|                    |                    |  |  |  |                    |        |  |
|--------------------|--------------------|--|--|--|--------------------|--------|--|
| Vv19g0272          |                    |  |  |  |                    |        |  |
| Vv19g0273          |                    |  |  |  |                    |        |  |
| Vv19g0274          |                    |  |  |  |                    |        |  |
| Vv19g0275          |                    |  |  |  |                    |        |  |
| Vv19g0276          |                    |  |  |  |                    |        |  |
| Vv19g0277          |                    |  |  |  |                    |        |  |
| Vv19g0278          |                    |  |  |  |                    |        |  |
| Vv19g0279          |                    |  |  |  | Gorai.002G070200.1 |        |  |
|                    | Vv12g0366          |  |  |  |                    |        |  |
| Vv19g0280          |                    |  |  |  |                    |        |  |
| Vv19g0281          |                    |  |  |  | Gorai.002G070300.1 |        |  |
| Gorai.009G388500.1 |                    |  |  |  |                    |        |  |
| Vv19g0282          |                    |  |  |  |                    |        |  |
| Vv19g0283          |                    |  |  |  | Gorai.002G070400.1 |        |  |
| Gorai.009G388800.1 |                    |  |  |  |                    |        |  |
| Vv19g0284          |                    |  |  |  | Gorai.007G322400.1 | Gorai. |  |
| 002G070500.1       | Gorai.009G389200.1 |  |  |  |                    |        |  |
| Vv19g0285          |                    |  |  |  |                    |        |  |
| Vv19g0286          |                    |  |  |  |                    |        |  |

|           |              |                    |                    |                    |   |
|-----------|--------------|--------------------|--------------------|--------------------|---|
| Vv19g0287 | .            | .                  | .                  | Gorai.002G071000.1 | . |
| .         | .            | .                  | .                  | .                  | . |
| Vv19g0288 | .            | .                  | .                  | .                  | . |
| .         | .            | .                  | .                  | .                  | . |
| Vv19g0289 | .            | .                  | .                  | .                  | . |
| .         | .            | .                  | .                  | .                  | . |
| Vv19g0290 | .            | .                  | .                  | Gorai.009G389800.1 | . |
| .         | .            | .                  | .                  | .                  | . |
| Vv19g0291 | .            | .                  | Gorai.007G321600.1 | .                  | . |
| .         | .            | .                  | .                  | .                  | . |
| Vv19g0292 | .            | .                  | .                  | .                  | . |
| .         | .            | .                  | .                  | .                  | . |
| Vv19g0293 | .            | .                  | .                  | .                  | . |
| .         | .            | .                  | .                  | .                  | . |
| Vv19g0294 | .            | .                  | .                  | .                  | . |
| .         | .            | .                  | .                  | .                  | . |
| Vv19g0295 | .            | .                  | .                  | .                  | . |
| .         | .            | .                  | .                  | .                  | . |
| Vv19g0296 | .            | .                  | .                  | .                  | . |
| .         | .            | .                  | .                  | .                  | . |
| Vv19g0297 | .            | .                  | .                  | .                  | . |
| .         | .            | .                  | .                  | .                  | . |
| Vv19g0298 | .            | .                  | .                  | .                  | . |
| .         | .            | .                  | .                  | .                  | . |
| Vv19g0299 | .            | Gorai.013G168000.1 | .                  | .                  | . |
| .         | Vv12g0384    | .                  | .                  | .                  | . |
| Vv19g0300 | .            | .                  | .                  | .                  | . |
| .         | .            | .                  | .                  | .                  | . |
| Vv19g0301 | .            | .                  | .                  | Gorai.002G071600.1 | . |
| .         | .            | .                  | .                  | .                  | . |
| Vv19g0302 | Tc07_g001050 | .                  | .                  | Gorai.002G071700.1 | . |
| .         | .            | .                  | .                  | .                  | . |
| Vv19g0303 | .            | .                  | .                  | Gorai.009G390800.1 | . |
| .         | .            | .                  | .                  | .                  | . |

|                    |   |                    |                    |                    |                    |   |   |
|--------------------|---|--------------------|--------------------|--------------------|--------------------|---|---|
| Vv19g0304          | . | .                  | .                  | .                  | .                  | . | . |
| .                  | . | .                  | .                  | .                  | .                  | . | . |
| Vv19g0305          | . | .                  | .                  | .                  | .                  | . | . |
| 002G072200.1       | . | .                  | Gorai.007G321200.1 | .                  | Gorai.             | . | . |
| .                  | . | .                  | .                  | .                  | .                  | . | . |
| Vv19g0306          | . | .                  | .                  | .                  | .                  | . | . |
| .                  | . | .                  | .                  | .                  | .                  | . | . |
| Vv19g0307          | . | .                  | .                  | .                  | Gorai.002G072500.1 | . | . |
| Gorai.004G029300.1 | . | .                  | .                  | .                  | .                  | . | . |
| .                  | . | .                  | .                  | .                  | .                  | . | . |
| Vv19g0308          | . | .                  | .                  | .                  | Gorai.009G434700.1 | . | . |
| .                  | . | .                  | .                  | .                  | .                  | . | . |
| Vv19g0309          | . | Gorai.013G167800.1 | .                  | .                  | .                  | . | . |
| .                  | . | .                  | .                  | .                  | .                  | . | . |
| Vv19g0310          | . | .                  | .                  | .                  | .                  | . | . |
| .                  | . | .                  | .                  | .                  | .                  | . | . |
| Vv19g0311          | . | .                  | .                  | .                  | .                  | . | . |
| .                  | . | .                  | .                  | .                  | .                  | . | . |
| Vv19g0312          | . | .                  | .                  | .                  | .                  | . | . |
| .                  | . | .                  | .                  | .                  | .                  | . | . |
| Vv19g0313          | . | .                  | Gorai.007G319700.1 | .                  | .                  | . | . |
| .                  | . | .                  | .                  | .                  | .                  | . | . |
| Vv19g0314          | . | .                  | Gorai.007G316900.1 | .                  | .                  | . | . |
| Gorai.009G434600.1 | . | .                  | .                  | .                  | .                  | . | . |
| .                  | . | .                  | .                  | .                  | .                  | . | . |
| Vv19g0315          | . | .                  | .                  | Gorai.002G072600.1 | .                  | . | . |
| Gorai.009G434500.1 | . | .                  | .                  | .                  | .                  | . | . |
| .                  | . | .                  | .                  | .                  | .                  | . | . |
| Vv19g0316          | . | .                  | .                  | .                  | .                  | . | . |
| .                  | . | .                  | .                  | .                  | .                  | . | . |
| Vv19g0317          | . | .                  | .                  | .                  | .                  | . | . |
| .                  | . | .                  | .                  | .                  | .                  | . | . |
| Vv19g0318          | . | .                  | .                  | Gorai.002G072700.1 | .                  | . | . |
| .                  | . | .                  | .                  | .                  | .                  | . | . |
| .                  | . | .                  | .                  | .                  | .                  | . | . |

|                    |              |                    |                    |        |   |   |   |
|--------------------|--------------|--------------------|--------------------|--------|---|---|---|
| Vv19g0319          | .            | .                  | .                  | .      | . | . | . |
| .                  | .            | .                  | .                  | .      | . | . | . |
| .                  | .            | .                  | .                  | .      | . | . | . |
| Vv19g0320          | .            | Gorai.013G167700.1 | .                  | .      | . | . | . |
| Gorai.009G433900.1 | .            | .                  | .                  | .      | . | . | . |
| .                  | .            | .                  | .                  | .      | . | . | . |
| .                  | .            | .                  | .                  | .      | . | . | . |
| Vv19g0321          | .            | Gorai.013G167600.1 | .                  | Gorai. | . | . | . |
| 002G073100.1       | .            | .                  | .                  | .      | . | . | . |
| .                  | .            | .                  | .                  | .      | . | . | . |
| .                  | .            | .                  | .                  | .      | . | . | . |
| Vv19g0322          | Tc07_g013260 | .                  | .                  | .      | . | . | . |
| .                  | .            | .                  | .                  | .      | . | . | . |
| .                  | .            | .                  | .                  | .      | . | . | . |
| Vv19g0323          | .            | .                  | Gorai.002G073300.1 | .      | . | . | . |
| Gorai.009G433800.1 | .            | .                  | .                  | .      | . | . | . |
| .                  | .            | .                  | .                  | .      | . | . | . |
| .                  | .            | .                  | .                  | .      | . | . | . |
| Vv19g0324          | .            | Gorai.013G167500.1 | .                  | Gorai. | . | . | . |
| 002G073400.1       | .            | .                  | .                  | .      | . | . | . |
| .                  | .            | .                  | .                  | .      | . | . | . |
| .                  | .            | .                  | .                  | .      | . | . | . |
| Vv19g0325          | .            | .                  | .                  | .      | . | . | . |
| .                  | .            | .                  | .                  | .      | . | . | . |
| .                  | .            | .                  | .                  | .      | . | . | . |
| Vv19g0326          | .            | .                  | Gorai.002G073500.1 | .      | . | . | . |
| Gorai.009G433600.1 | .            | Gorai.004G029200.1 | .                  | .      | . | . | . |
| .                  | .            | .                  | .                  | .      | . | . | . |
| .                  | .            | .                  | .                  | .      | . | . | . |
| Vv19g0327          | .            | Gorai.013G167400.1 | .                  | .      | . | . | . |
| .                  | .            | .                  | .                  | .      | . | . | . |
| .                  | .            | .                  | .                  | .      | . | . | . |
| Vv19g0328          | .            | Gorai.013G164400.1 | .                  | .      | . | . | . |
| .                  | .            | .                  | .                  | .      | . | . | . |
| .                  | .            | .                  | .                  | .      | . | . | . |
| Vv19g0329          | .            | .                  | .                  | .      | . | . | . |
| .                  | .            | .                  | .                  | .      | . | . | . |
| .                  | .            | .                  | .                  | .      | . | . | . |
| Vv19g0330          | .            | .                  | .                  | .      | . | . | . |
| .                  | .            | .                  | .                  | .      | . | . | . |
| .                  | .            | .                  | .                  | .      | . | . | . |
| Vv19g0331          | .            | .                  | .                  | .      | . | . | . |
| .                  | .            | .                  | .                  | .      | . | . | . |
| .                  | .            | .                  | .                  | .      | . | . | . |
| Vv19g0332          | Tc07_g013130 | .                  | .                  | .      | . | . | . |
| .                  | .            | .                  | .                  | .      | . | . | . |
| .                  | .            | .                  | .                  | .      | . | . | . |
| Vv19g0333          | .            | .                  | .                  | .      | . | . | . |
| .                  | .            | .                  | .                  | .      | . | . | . |
| .                  | .            | .                  | .                  | .      | . | . | . |

|                    |   |   |   |   |                    |   |
|--------------------|---|---|---|---|--------------------|---|
| Vv19g0334          | . | . | . | . | Gorai.009G432500.1 | . |
| .                  | . | . | . | . | .                  | . |
| Vv19g0335          | . | . | . | . | .                  | . |
| .                  | . | . | . | . | .                  | . |
| Vv19g0336          | . | . | . | . | Gorai.002G074000.1 | . |
| .                  | . | . | . | . | .                  | . |
| Vv19g0337          | . | . | . | . | Gorai.002G074300.1 | . |
| Gorai.009G432300.1 | . | . | . | . | .                  | . |
| .                  | . | . | . | . | .                  | . |
| Vv19g0338          | . | . | . | . | Gorai.002G074400.1 | . |
| .                  | . | . | . | . | .                  | . |
| Vv19g0339          | . | . | . | . | Gorai.002G074500.1 | . |
| Gorai.009G432200.1 | . | . | . | . | .                  | . |
| .                  | . | . | . | . | .                  | . |
| Vv19g0340          | . | . | . | . | .                  | . |
| .                  | . | . | . | . | .                  | . |
| Vv19g0341          | . | . | . | . | Gorai.002G074800.1 | . |
| .                  | . | . | . | . | .                  | . |
| Vv19g0342          | . | . | . | . | .                  | . |
| .                  | . | . | . | . | .                  | . |
| Vv19g0343          | . | . | . | . | Gorai.002G074900.1 | . |
| Gorai.009G432000.1 | . | . | . | . | .                  | . |
| .                  | . | . | . | . | .                  | . |
| Vv19g0344          | . | . | . | . | .                  | . |
| .                  | . | . | . | . | .                  | . |
| Vv19g0345          | . | . | . | . | .                  | . |
| .                  | . | . | . | . | .                  | . |
| Vv19g0346          | . | . | . | . | .                  | . |
| .                  | . | . | . | . | .                  | . |
| Vv19g0347          | . | . | . | . | .                  | . |
| .                  | . | . | . | . | .                  | . |
| Vv19g0348          | . | . | . | . | .                  | . |
| .                  | . | . | . | . | .                  | . |
| Vv19g0349          | . | . | . | . | Gorai.002G075600.1 | . |
| .                  | . | . | . | . | .                  | . |





|                    |   |   |   |   |                    |   |
|--------------------|---|---|---|---|--------------------|---|
| Vv19g0366          | . | . | . | . | Gorai.002G076500.1 | . |
| Gorai.009G430700.1 | . | . | . | . | .                  | . |
| .                  | . | . | . | . | .                  | . |
| Vv19g0367          | . | . | . | . | Gorai.002G076600.1 | . |
| .                  | . | . | . | . | .                  | . |
| Vv19g0368          | . | . | . | . | .                  | . |
| .                  | . | . | . | . | .                  | . |
| Vv19g0369          | . | . | . | . | Gorai.009G430500.1 | . |
| .                  | . | . | . | . | .                  | . |
| Vv19g0370          | . | . | . | . | Gorai.009G430400.1 | . |
| Gorai.004G029100.1 | . | . | . | . | .                  | . |
| .                  | . | . | . | . | .                  | . |
| Vv19g0371          | . | . | . | . | .                  | . |
| .                  | . | . | . | . | .                  | . |
| Vv19g0372          | . | . | . | . | .                  | . |
| .                  | . | . | . | . | .                  | . |
| Vv19g0373          | . | . | . | . | .                  | . |
| .                  | . | . | . | . | .                  | . |
| Vv19g0374          | . | . | . | . | .                  | . |
| .                  | . | . | . | . | .                  | . |
| Vv19g0375          | . | . | . | . | .                  | . |
| .                  | . | . | . | . | .                  | . |
| Vv19g0376          | . | . | . | . | .                  | . |
| .                  | . | . | . | . | .                  | . |
| Vv19g0377          | . | . | . | . | .                  | . |
| .                  | . | . | . | . | .                  | . |
| Vv19g0378          | . | . | . | . | .                  | . |
| .                  | . | . | . | . | .                  | . |
| Vv19g0379          | . | . | . | . | .                  | . |
| .                  | . | . | . | . | .                  | . |
| Vv19g0380          | . | . | . | . | .                  | . |
| .                  | . | . | . | . | .                  | . |
| Vv19g0381          | . | . | . | . | .                  | . |
| .                  | . | . | . | . | .                  | . |

|                    |              |   |   |   |   |                    |
|--------------------|--------------|---|---|---|---|--------------------|
| Vv19g0382          | .            | . | . | . | . | Gorai.             |
| 004G028800.1       | .            | . | . | . | . | .                  |
| Vv19g0383          | .            | . | . | . | . | .                  |
| .                  | .            | . | . | . | . | .                  |
| Vv19g0384          | .            | . | . | . | . | .                  |
| .                  | .            | . | . | . | . | .                  |
| Vv19g0385          | .            | . | . | . | . | .                  |
| .                  | .            | . | . | . | . | .                  |
| Vv19g0386          | .            | . | . | . | . | Gorai.009G430000.1 |
| .                  | .            | . | . | . | . | .                  |
| Vv19g0387          | .            | . | . | . | . | Gorai.009G429900.1 |
| Gorai.004G028600.1 | .            | . | . | . | . | .                  |
| .                  | .            | . | . | . | . | .                  |
| Vv19g0388          | .            | . | . | . | . | .                  |
| .                  | .            | . | . | . | . | .                  |
| Vv19g0389          | .            | . | . | . | . | .                  |
| .                  | .            | . | . | . | . | .                  |
| Vv19g0390          | .            | . | . | . | . | .                  |
| .                  | .            | . | . | . | . | .                  |
| Vv19g0391          | .            | . | . | . | . | .                  |
| .                  | .            | . | . | . | . | .                  |
| Vv19g0392          | .            | . | . | . | . | Gorai.009G427300.1 |
| .                  | .            | . | . | . | . | .                  |
| Vv19g0393          | .            | . | . | . | . | .                  |
| .                  | .            | . | . | . | . | .                  |
| Vv19g0394          | .            | . | . | . | . | .                  |
| .                  | .            | . | . | . | . | .                  |
| Vv19g0395          | Tc07_g006400 | . | . | . | . | .                  |
| .                  | .            | . | . | . | . | .                  |
| Vv19g0396          | .            | . | . | . | . | .                  |
| .                  | .            | . | . | . | . | .                  |
| Vv19g0397          | .            | . | . | . | . | .                  |
| .                  | .            | . | . | . | . | .                  |
| .                  | .            | . | . | . | . | .                  |

|           |              |   |   |   |   |   |
|-----------|--------------|---|---|---|---|---|
| Vv19g0398 | Tc07_g006390 | . | . | . | . | . |
| .         | .            | . | . | . | . | . |
| Vv19g0399 | .            | . | . | . | . | . |
| .         | .            | . | . | . | . | . |
| Vv19g0400 | .            | . | . | . | . | . |
| .         | .            | . | . | . | . | . |
| Vv19g0401 | .            | . | . | . | . | . |
| .         | .            | . | . | . | . | . |
| Vv19g0402 | Tc07_g006370 | . | . | . | . | . |
| .         | .            | . | . | . | . | . |
| Vv19g0403 | .            | . | . | . | . | . |
| .         | .            | . | . | . | . | . |
| Vv19g0404 | Tc07_g006360 | . | . | . | . | . |
| .         | .            | . | . | . | . | . |
| Vv19g0405 | .            | . | . | . | . | . |
| .         | .            | . | . | . | . | . |
| Vv19g0406 | Tc07_g006350 | . | . | . | . | . |
| .         | .            | . | . | . | . | . |
| Vv19g0407 | .            | . | . | . | . | . |
| .         | .            | . | . | . | . | . |
| Vv19g0408 | Tc07_g006340 | . | . | . | . | . |
| .         | .            | . | . | . | . | . |
| Vv19g0409 | .            | . | . | . | . | . |
| .         | .            | . | . | . | . | . |
| Vv19g0410 | .            | . | . | . | . | . |
| .         | .            | . | . | . | . | . |
| Vv19g0411 | .            | . | . | . | . | . |
| .         | .            | . | . | . | . | . |
| Vv19g0412 | .            | . | . | . | . | . |
| .         | .            | . | . | . | . | . |
| Vv19g0413 | .            | . | . | . | . | . |
| .         | .            | . | . | . | . | . |
| Vv19g0414 | .            | . | . | . | . | . |
| .         | .            | . | . | . | . | . |

|           |              |   |   |   |   |   |   |
|-----------|--------------|---|---|---|---|---|---|
| Vv19g0415 | .            | . | . | . | . | . | . |
| .         | .            | . | . | . | . | . | . |
| Vv19g0416 | .            | . | . | . | . | . | . |
| .         | .            | . | . | . | . | . | . |
| Vv19g0417 | .            | . | . | . | . | . | . |
| .         | .            | . | . | . | . | . | . |
| Vv19g0418 | .            | . | . | . | . | . | . |
| .         | .            | . | . | . | . | . | . |
| Vv19g0419 | .            | . | . | . | . | . | . |
| .         | .            | . | . | . | . | . | . |
| Vv19g0420 | .            | . | . | . | . | . | . |
| .         | .            | . | . | . | . | . | . |
| Vv19g0421 | .            | . | . | . | . | . | . |
| .         | .            | . | . | . | . | . | . |
| Vv19g0422 | .            | . | . | . | . | . | . |
| .         | .            | . | . | . | . | . | . |
| Vv19g0423 | .            | . | . | . | . | . | . |
| .         | .            | . | . | . | . | . | . |
| Vv19g0424 | .            | . | . | . | . | . | . |
| .         | .            | . | . | . | . | . | . |
| Vv19g0425 | .            | . | . | . | . | . | . |
| .         | .            | . | . | . | . | . | . |
| Vv19g0426 | .            | . | . | . | . | . | . |
| .         | .            | . | . | . | . | . | . |
| Vv19g0427 | .            | . | . | . | . | . | . |
| .         | .            | . | . | . | . | . | . |
| Vv19g0428 | Tc07_g006030 | . | . | . | . | . | . |
| .         | .            | . | . | . | . | . | . |
| Vv19g0429 | .            | . | . | . | . | . | . |
| .         | .            | . | . | . | . | . | . |
| Vv19g0430 | .            | . | . | . | . | . | . |
| .         | .            | . | . | . | . | . | . |
| Vv19g0431 | .            | . | . | . | . | . | . |

|           |              |   |   |   |   |   |   |
|-----------|--------------|---|---|---|---|---|---|
| .         | .            | . | . | . | . | . | . |
| .         | .            | . | . | . | . | . | . |
| Vv19g0432 | .            | . | . | . | . | . | . |
| .         | .            | . | . | . | . | . | . |
| Vv19g0433 | .            | . | . | . | . | . | . |
| .         | .            | . | . | . | . | . | . |
| Vv19g0434 | .            | . | . | . | . | . | . |
| .         | .            | . | . | . | . | . | . |
| Vv19g0435 | .            | . | . | . | . | . | . |
| .         | .            | . | . | . | . | . | . |
| Vv19g0436 | .            | . | . | . | . | . | . |
| .         | .            | . | . | . | . | . | . |
| Vv19g0437 | .            | . | . | . | . | . | . |
| .         | .            | . | . | . | . | . | . |
| Vv19g0438 | .            | . | . | . | . | . | . |
| .         | .            | . | . | . | . | . | . |
| Vv19g0439 | .            | . | . | . | . | . | . |
| .         | .            | . | . | . | . | . | . |
| Vv19g0440 | .            | . | . | . | . | . | . |
| .         | .            | . | . | . | . | . | . |
| Vv19g0441 | Tc07_g005920 | . | . | . | . | . | . |
| .         | .            | . | . | . | . | . | . |
| Vv19g0442 | .            | . | . | . | . | . | . |
| .         | .            | . | . | . | . | . | . |
| Vv19g0443 | .            | . | . | . | . | . | . |
| .         | .            | . | . | . | . | . | . |
| Vv19g0444 | .            | . | . | . | . | . | . |
| .         | .            | . | . | . | . | . | . |
| Vv19g0445 | .            | . | . | . | . | . | . |
| .         | .            | . | . | . | . | . | . |
| Vv19g0446 | .            | . | . | . | . | . | . |
| .         | .            | . | . | . | . | . | . |
| Vv19g0447 | Tc07_g005770 | . | . | . | . | . | . |
| .         | .            | . | . | . | . | . | . |
| .         | .            | . | . | . | . | . | . |

|           |              |   |   |   |                    |   |   |
|-----------|--------------|---|---|---|--------------------|---|---|
| Vv19g0448 | .            | . | . | . | .                  | . | . |
| .         | .            | . | . | . | .                  | . | . |
| Vv19g0449 | Tc07_g005730 | . | . | . | Gorai.002G077900.1 | . | . |
| .         | .            | . | . | . | .                  | . | . |
| Vv19g0450 | Tc07_g005700 | . | . | . | .                  | . | . |
| .         | .            | . | . | . | .                  | . | . |
| Vv19g0451 | Tc07_g005690 | . | . | . | .                  | . | . |
| .         | .            | . | . | . | .                  | . | . |
| Vv19g0452 | Tc07_g005680 | . | . | . | .                  | . | . |
| .         | .            | . | . | . | .                  | . | . |
| Vv19g0453 | Tc07_g005670 | . | . | . | .                  | . | . |
| .         | .            | . | . | . | .                  | . | . |
| Vv19g0454 | Tc07_g005630 | . | . | . | .                  | . | . |
| .         | .            | . | . | . | .                  | . | . |
| Vv19g0455 | Tc07_g005620 | . | . | . | .                  | . | . |
| .         | .            | . | . | . | .                  | . | . |
| Vv19g0456 | Tc07_g005610 | . | . | . | .                  | . | . |
| .         | .            | . | . | . | .                  | . | . |
| Vv19g0457 | Tc07_g005590 | . | . | . | Gorai.002G078600.1 | . | . |
| .         | .            | . | . | . | .                  | . | . |
| Vv19g0458 | Tc07_g005580 | . | . | . | .                  | . | . |
| .         | .            | . | . | . | .                  | . | . |
| Vv19g0459 | Tc07_g005560 | . | . | . | .                  | . | . |
| .         | .            | . | . | . | .                  | . | . |
| Vv19g0460 | .            | . | . | . | .                  | . | . |
| .         | .            | . | . | . | .                  | . | . |
| Vv19g0461 | .            | . | . | . | .                  | . | . |
| .         | .            | . | . | . | .                  | . | . |
| Vv19g0462 | .            | . | . | . | .                  | . | . |
| .         | .            | . | . | . | .                  | . | . |
| Vv19g0463 | Tc07_g005550 | . | . | . | .                  | . | . |
| .         | .            | . | . | . | .                  | . | . |
| Vv19g0464 | .            | . | . | . | .                  | . | . |
| .         | .            | . | . | . | .                  | . | . |

|              |                    |   |   |                    |        |   |
|--------------|--------------------|---|---|--------------------|--------|---|
| Vv19g0465    | Tc07_g005520       | . | . | .                  | .      | . |
| .            | .                  | . | . | .                  | .      | . |
| Vv19g0466    | Tc07_g005510       | . | . | .                  | .      | . |
| .            | .                  | . | . | .                  | .      | . |
| Vv19g0467    | Tc07_g005490       | . | . | .                  | .      | . |
| .            | .                  | . | . | .                  | .      | . |
| Vv19g0468    | .                  | . | . | .                  | .      | . |
| .            | .                  | . | . | .                  | .      | . |
| Vv19g0469    | Tc07_g005480       | . | . | .                  | .      | . |
| .            | .                  | . | . | .                  | .      | . |
| Vv19g0470    | .                  | . | . | .                  | .      | . |
| .            | .                  | . | . | .                  | .      | . |
| Vv19g0471    | .                  | . | . | .                  | .      | . |
| .            | .                  | . | . | .                  | .      | . |
| Vv19g0472    | .                  | . | . | .                  | .      | . |
| .            | .                  | . | . | .                  | .      | . |
| Vv19g0473    | Tc07_g005460       | . | . | .                  | .      | . |
| .            | .                  | . | . | .                  | .      | . |
| Vv19g0474    | Tc07_g005450       | . | . | .                  | .      | . |
| .            | .                  | . | . | .                  | .      | . |
| Vv19g0475    | Tc07_g005440       | . | . | .                  | .      | . |
| .            | .                  | . | . | .                  | .      | . |
| Vv19g0476    | Tc07_g005400       | . | . | .                  | .      | . |
| .            | .                  | . | . | .                  | .      | . |
| Vv19g0477    | Gorai.013G165400.1 | . | . | .                  | Gorai. | . |
| 002G078700.1 | Vv12g0406          | . | . | .                  | .      | . |
| .            | Gorai.004G028700.1 | . | . | .                  | .      | . |
| .            | .                  | . | . | .                  | .      | . |
| Vv19g0478    | .                  | . | . | Gorai.002G079100.1 | .      | . |
| .            | .                  | . | . | .                  | .      | . |
| Vv19g0479    | .                  | . | . | Gorai.002G079200.1 | .      | . |
| .            | .                  | . | . | .                  | .      | . |
| Vv19g0480    | .                  | . | . | .                  | .      | . |
| .            | .                  | . | . | .                  | .      | . |
| .            | .                  | . | . | .                  | .      | . |



|              |                    |                    |              |                    |        |
|--------------|--------------------|--------------------|--------------|--------------------|--------|
| Vv19g0481    | .                  | .                  | .            | Gorai.002G079300.1 | .      |
| .            | .                  | .                  | .            | .                  | .      |
| Vv19g0482    | .                  | .                  | .            | Gorai.002G079500.1 | .      |
| .            | Vv12g0407          | .                  | Tc01_g030220 | .                  | .      |
| .            | Gorai.004G029600.1 | .                  | .            | .                  | .      |
| Vv19g0483    | .                  | .                  | .            | Gorai.007G317600.1 | .      |
| .            | .                  | .                  | .            | .                  | .      |
| Vv19g0484    | .                  | .                  | .            | Gorai.007G317500.1 | Gorai. |
| 002G079900.1 | .                  | .                  | .            | .                  | .      |
| .            | .                  | Vv010rg0180        | .            | .                  | .      |
| Vv19g0485    | .                  | Gorai.013G165300.1 | .            | Gorai.007G317300.1 | .      |
| .            | .                  | .                  | .            | .                  | .      |
| .            | .                  | .                  | .            | .                  | .      |
| Vv19g0486    | .                  | Gorai.013G165200.1 | .            | Gorai.             | .      |
| 002G080000.1 | .                  | .                  | .            | .                  | .      |
| .            | .                  | .                  | .            | .                  | .      |
| Vv19g0487    | .                  | Gorai.013G165100.1 | .            | .                  | .      |
| .            | .                  | .                  | .            | .                  | .      |
| Vv19g0488    | .                  | .                  | .            | .                  | .      |
| Vv12g0426    | .                  | .                  | .            | .                  | .      |
| Vv19g0489    | .                  | .                  | .            | Gorai.007G316900.1 | .      |
| .            | .                  | .                  | .            | .                  | .      |
| Vv19g0490    | .                  | .                  | .            | .                  | .      |
| .            | .                  | .                  | .            | .                  | .      |
| Vv19g0491    | .                  | Gorai.013G165000.1 | .            | Gorai.             | .      |
| 002G080200.1 | .                  | .                  | .            | .                  | .      |
| .            | .                  | .                  | .            | .                  | .      |
| Vv19g0492    | .                  | .                  | .            | .                  | .      |
| .            | .                  | .                  | .            | .                  | .      |
| Vv19g0493    | Tc07_g005360       | .                  | .            | .                  | .      |
| .            | .                  | .                  | .            | .                  | .      |
| Vv19g0494    | .                  | .                  | .            | .                  | .      |
| .            | .                  | .                  | .            | .                  | .      |
| Vv19g0495    | Tc07_g005350       | .                  | .            | .                  | .      |
| .            | .                  | .                  | .            | .                  | .      |
| .            | .                  | .                  | .            | .                  | .      |

|                    |              |                    |                    |   |   |   |   |
|--------------------|--------------|--------------------|--------------------|---|---|---|---|
| Vv19g0496          | .            | .                  | .                  | . | . | . | . |
| .                  | .            | .                  | .                  | . | . | . | . |
| Vv19g0497          | .            | .                  | .                  | . | . | . | . |
| .                  | .            | .                  | .                  | . | . | . | . |
| Vv19g0498          | Tc07_g005340 | .                  | Gorai.007G315800.1 | . | . | . | . |
| .                  | .            | .                  | .                  | . | . | . | . |
| Vv19g0499          | Tc07_g005330 | .                  | .                  | . | . | . | . |
| .                  | .            | .                  | .                  | . | . | . | . |
| Vv19g0500          | .            | .                  | .                  | . | . | . | . |
| .                  | .            | .                  | .                  | . | . | . | . |
| Vv19g0501          | .            | .                  | .                  | . | . | . | . |
| .                  | .            | .                  | .                  | . | . | . | . |
| Vv19g0502          | .            | .                  | .                  | . | . | . | . |
| .                  | .            | .                  | .                  | . | . | . | . |
| Vv19g0503          | Tc07_g005320 | Gorai.013G164900.1 | .                  | . | . | . | . |
| .                  | .            | .                  | .                  | . | . | . | . |
| Vv19g0504          | Tc07_g005310 | .                  | Gorai.002G080300.1 | . | . | . | . |
| .                  | .            | .                  | .                  | . | . | . | . |
| Vv19g0505          | Tc07_g005290 | Gorai.013G164800.1 | .                  | . | . | . | . |
| Gorai.002G080400.1 | .            | .                  | .                  | . | . | . | . |
| .                  | .            | .                  | .                  | . | . | . | . |
| Vv19g0506          | .            | .                  | .                  | . | . | . | . |
| .                  | .            | .                  | .                  | . | . | . | . |
| Vv19g0507          | Tc07_g005280 | Gorai.007G315400.1 | .                  | . | . | . | . |
| Gorai.002G080500.1 | .            | .                  | .                  | . | . | . | . |
| .                  | .            | .                  | .                  | . | . | . | . |
| Vv19g0508          | .            | .                  | .                  | . | . | . | . |
| .                  | .            | .                  | .                  | . | . | . | . |
| Vv19g0509          | Tc07_g005270 | Gorai.013G164700.1 | .                  | . | . | . | . |
| Gorai.002G080600.1 | .            | .                  | .                  | . | . | . | . |
| .                  | .            | .                  | .                  | . | . | . | . |
| Vv19g0510          | .            | .                  | .                  | . | . | . | . |
| Vv12g0435          | .            | .                  | .                  | . | . | . | . |
| .                  | .            | .                  | .                  | . | . | . | . |
| Vv19g0511          | Tc07_g005260 | Gorai.013G164600.1 | .                  | . | . | . | . |
| Gorai.002G080700.1 | .            | .                  | .                  | . | . | . | . |

|                    |                    |                    |           |                    |   |   |
|--------------------|--------------------|--------------------|-----------|--------------------|---|---|
| .                  | .                  | .                  | .         | .                  | . | . |
| .                  | .                  | .                  | .         | .                  | . | . |
| Vv19g0512          | Tc07_g005250       | .                  | .         | Gorai.002G080800.1 | . | . |
| .                  | .                  | .                  | .         | .                  | . | . |
| .                  | .                  | .                  | .         | .                  | . | . |
| Vv19g0513          | Tc07_g005240       | .                  | .         | Gorai.002G081300.1 | . | . |
| .                  | .                  | .                  | .         | .                  | . | . |
| .                  | .                  | .                  | .         | .                  | . | . |
| Vv19g0514          | Tc07_g005230       | .                  | .         | Gorai.002G081400.1 | . | . |
| .                  | .                  | .                  | .         | .                  | . | . |
| .                  | .                  | .                  | .         | .                  | . | . |
| Vv19g0515          | .                  | .                  | .         | .                  | . | . |
| Vv12g0438          | .                  | .                  | .         | .                  | . | . |
| .                  | .                  | .                  | .         | .                  | . | . |
| Vv19g0516          | Tc07_g005210       | Gorai.013G164500.1 | .         | .                  | . | . |
| .                  | .                  | .                  | .         | .                  | . | . |
| .                  | .                  | .                  | .         | .                  | . | . |
| Vv19g0517          | Tc07_g005200       | Gorai.013G164400.1 | .         | .                  | . | . |
| .                  | Vv12g0444          | .                  | .         | .                  | . | . |
| .                  | .                  | .                  | .         | .                  | . | . |
| .                  | .                  | .                  | .         | .                  | . | . |
| Vv19g0518          | Tc07_g005190       | Gorai.013G164300.1 | .         | .                  | . | . |
| Gorai.002G081600.1 | .                  | .                  | .         | .                  | . | . |
| .                  | .                  | .                  | .         | .                  | . | . |
| .                  | .                  | .                  | .         | .                  | . | . |
| Vv19g0519          | Tc07_g005180       | .                  | .         | Gorai.002G081700.1 | . | . |
| .                  | .                  | .                  | .         | .                  | . | . |
| .                  | Vv010rg0170        | .                  | .         | .                  | . | . |
| .                  | .                  | .                  | .         | .                  | . | . |
| Vv19g0520          | Tc07_g005170       | Gorai.013G164200.1 | .         | .                  | . | . |
| .                  | .                  | .                  | .         | .                  | . | . |
| .                  | .                  | .                  | .         | .                  | . | . |
| Vv19g0521          | Tc07_g005160       | .                  | .         | Gorai.002G081800.1 | . | . |
| .                  | .                  | .                  | .         | .                  | . | . |
| .                  | Vv010rg0162        | .                  | .         | .                  | . | . |
| .                  | .                  | .                  | .         | .                  | . | . |
| Vv19g0522          | Tc07_g005150       | Gorai.013G164100.1 | Gorai.    | .                  | . | . |
| 007G314800.1       | Gorai.002G081900.1 | .                  | Vv12g0449 | .                  | . | . |
| .                  | .                  | .                  | .         | .                  | . | . |
| .                  | .                  | .                  | .         | .                  | . | . |
| Vv19g0523          | .                  | .                  | .         | .                  | . | . |
| .                  | .                  | .                  | .         | .                  | . | . |
| .                  | .                  | .                  | .         | .                  | . | . |
| Vv19g0524          | .                  | .                  | .         | .                  | . | . |
| Vv12g0460          | Tc01_g029690       | .                  | .         | .                  | . | . |
| .                  | .                  | .                  | .         | .                  | . | . |
| Vv19g0525          | Tc07_g005130       | Gorai.013G164000.1 | .         | .                  | . | . |
| Gorai.002G082100.1 | .                  | .                  | .         | .                  | . | . |
| .                  | .                  | .                  | .         | .                  | . | . |
| .                  | .                  | .                  | .         | .                  | . | . |

|                    |              |                    |                    |   |   |   |   |
|--------------------|--------------|--------------------|--------------------|---|---|---|---|
| Vv19g0526          | .            | .                  | .                  | . | . | . | . |
| .                  | .            | .                  | .                  | . | . | . | . |
| Vv19g0527          | .            | .                  | .                  | . | . | . | . |
| .                  | .            | .                  | .                  | . | . | . | . |
| Vv19g0528          | .            | .                  | .                  | . | . | . | . |
| .                  | .            | .                  | .                  | . | . | . | . |
| Vv19g0529          | .            | .                  | .                  | . | . | . | . |
| .                  | .            | .                  | .                  | . | . | . | . |
| Vv19g0530          | Tc07_g005120 | .                  | .                  | . | . | . | . |
| .                  | .            | .                  | .                  | . | . | . | . |
| Vv19g0531          | .            | .                  | .                  | . | . | . | . |
| .                  | .            | .                  | .                  | . | . | . | . |
| Vv19g0532          | .            | .                  | .                  | . | . | . | . |
| .                  | .            | .                  | .                  | . | . | . | . |
| Vv19g0533          | .            | .                  | .                  | . | . | . | . |
| .                  | .            | .                  | .                  | . | . | . | . |
| Vv19g0534          | Tc07_g005110 | .                  | Gorai.007G314600.1 | . | . | . | . |
| Gorai.002G082200.1 | .            | .                  | .                  | . | . | . | . |
| .                  | .            | .                  | .                  | . | . | . | . |
| Vv19g0535          | .            | .                  | .                  | . | . | . | . |
| .                  | .            | .                  | .                  | . | . | . | . |
| Vv19g0536          | Tc07_g005080 | .                  | Gorai.002G082300.1 | . | . | . | . |
| .                  | .            | .                  | .                  | . | . | . | . |
| Vv19g0537          | Tc07_g004990 | Gorai.013G163900.1 | .                  | . | . | . | . |
| .                  | .            | .                  | .                  | . | . | . | . |
| Vv19g0538          | Tc07_g004980 | Gorai.013G163800.1 | .                  | . | . | . | . |
| .                  | .            | .                  | .                  | . | . | . | . |
| Vv19g0539          | Tc07_g004970 | .                  | .                  | . | . | . | . |
| .                  | .            | .                  | .                  | . | . | . | . |
| Vv19g0540          | .            | .                  | .                  | . | . | . | . |
| .                  | .            | .                  | .                  | . | . | . | . |
| Vv19g0541          | .            | .                  | .                  | . | . | . | . |
| .                  | .            | .                  | .                  | . | . | . | . |
| Vv19g0542          | .            | .                  | .                  | . | . | . | . |

|                    |              |                    |   |                    |   |   |   |
|--------------------|--------------|--------------------|---|--------------------|---|---|---|
| .                  | .            | .                  | . | .                  | . | . | . |
| .                  | .            | .                  | . | .                  | . | . | . |
| Vv19g0543          | .            | .                  | . | .                  | . | . | . |
| .                  | .            | .                  | . | .                  | . | . | . |
| Vv19g0544          | .            | .                  | . | .                  | . | . | . |
| .                  | .            | .                  | . | .                  | . | . | . |
| Vv19g0545          | .            | .                  | . | .                  | . | . | . |
| .                  | .            | .                  | . | .                  | . | . | . |
| Vv19g0546          | Tc07_g004960 | .                  | . | Gorai.002G082500.1 | . | . | . |
| .                  | .            | .                  | . | .                  | . | . | . |
| Vv19g0547          | .            | .                  | . | .                  | . | . | . |
| .                  | .            | .                  | . | .                  | . | . | . |
| Vv19g0548          | .            | .                  | . | .                  | . | . | . |
| .                  | .            | .                  | . | .                  | . | . | . |
| Vv19g0549          | .            | .                  | . | .                  | . | . | . |
| .                  | .            | .                  | . | .                  | . | . | . |
| Vv19g0550          | .            | .                  | . | .                  | . | . | . |
| .                  | .            | .                  | . | .                  | . | . | . |
| Vv19g0551          | .            | .                  | . | .                  | . | . | . |
| .                  | .            | .                  | . | .                  | . | . | . |
| Vv19g0552          | .            | .                  | . | .                  | . | . | . |
| .                  | .            | .                  | . | .                  | . | . | . |
| Vv19g0553          | Tc07_g004940 | Gorai.013G163700.1 | . | .                  | . | . | . |
| .                  | .            | .                  | . | .                  | . | . | . |
| Vv19g0554          | .            | .                  | . | .                  | . | . | . |
| .                  | .            | .                  | . | .                  | . | . | . |
| Vv19g0555          | .            | .                  | . | .                  | . | . | . |
| .                  | .            | .                  | . | .                  | . | . | . |
| Vv19g0556          | .            | .                  | . | .                  | . | . | . |
| .                  | .            | .                  | . | .                  | . | . | . |
| Vv19g0557          | .            | .                  | . | .                  | . | . | . |
| .                  | .            | .                  | . | .                  | . | . | . |
| Vv19g0558          | Tc07_g004910 | Gorai.013G163600.1 | . | .                  | . | . | . |
| Gorai.002G082700.1 | .            | Vv010rg0135        | . | .                  | . | . | . |
| .                  | .            | .                  | . | .                  | . | . | . |

|                    |                    |                    |                    |                    |   |   |   |
|--------------------|--------------------|--------------------|--------------------|--------------------|---|---|---|
| Vv19g0559          | .                  | .                  | .                  | .                  | . | . | . |
| .                  | .                  | .                  | .                  | .                  | . | . | . |
| Vv19g0560          | Tc07_g004900       | .                  | .                  | Gorai.002G082800.1 | . | . | . |
| .                  | .                  | .                  | .                  | .                  | . | . | . |
| Vv19g0561          | .                  | .                  | .                  | .                  | . | . | . |
| .                  | .                  | .                  | .                  | .                  | . | . | . |
| Vv19g0562          | .                  | .                  | .                  | .                  | . | . | . |
| .                  | .                  | .                  | .                  | .                  | . | . | . |
| Vv19g0563          | .                  | .                  | .                  | .                  | . | . | . |
| .                  | .                  | .                  | .                  | .                  | . | . | . |
| Vv19g0564          | .                  | .                  | .                  | .                  | . | . | . |
| .                  | .                  | .                  | .                  | .                  | . | . | . |
| Vv19g0565          | .                  | .                  | .                  | .                  | . | . | . |
| .                  | .                  | .                  | .                  | .                  | . | . | . |
| Vv19g0566          | .                  | .                  | .                  | .                  | . | . | . |
| .                  | .                  | .                  | .                  | .                  | . | . | . |
| Vv19g0567          | .                  | .                  | .                  | .                  | . | . | . |
| .                  | .                  | .                  | .                  | .                  | . | . | . |
| Vv19g0568          | .                  | .                  | .                  | .                  | . | . | . |
| .                  | .                  | .                  | .                  | .                  | . | . | . |
| Vv19g0569          | .                  | .                  | .                  | Gorai.002G083700.1 | . | . | . |
| .                  | Vv010rg0122        | .                  | .                  | .                  | . | . | . |
| .                  | .                  | .                  | .                  | .                  | . | . | . |
| Vv19g0570          | Tc07_g004810       | .                  | .                  | .                  | . | . | . |
| .                  | .                  | .                  | .                  | .                  | . | . | . |
| .                  | .                  | .                  | .                  | .                  | . | . | . |
| Vv19g0571          | Tc07_g004780       | Gorai.013G163300.1 | .                  | .                  | . | . | . |
| Gorai.002G083800.1 | .                  | .                  | Vv010rg0116        | .                  | . | . | . |
| .                  | .                  | .                  | .                  | .                  | . | . | . |
| .                  | .                  | .                  | .                  | .                  | . | . | . |
| Vv19g0572          | Tc07_g004770       | .                  | Gorai.007G313900.1 | .                  | . | . | . |
| Gorai.002G083900.1 | Gorai.009G426300.1 | Gorai.004G028200.1 | .                  | .                  | . | . | . |
| .                  | .                  | .                  | .                  | .                  | . | . | . |
| .                  | .                  | .                  | .                  | .                  | . | . | . |
| Vv19g0573          | .                  | .                  | .                  | .                  | . | . | . |
| .                  | .                  | .                  | .                  | .                  | . | . | . |
| .                  | .                  | .                  | .                  | .                  | . | . | . |
| Vv19g0574          | Tc07_g004760       | Gorai.013G163200.1 | .                  | .                  | . | . | . |
| Gorai.009G426200.1 | .                  | .                  | .                  | .                  | . | . | . |

|                    |                    |                    |                    |                    |   |
|--------------------|--------------------|--------------------|--------------------|--------------------|---|
| .                  | .                  | .                  | .                  | .                  | . |
| Vv19g0575          | Tc07_g004750       | Gorai.013G163100.1 | .                  | .                  | . |
|                    | Gorai.009G426100.1 | Gorai.004G028100.1 | .                  | .                  | . |
| .                  | .                  | .                  | .                  | .                  | . |
| Vv19g0576          | Tc07_g004500       | .                  | .                  | Gorai.002G084200.1 | . |
| .                  | .                  | .                  | .                  | .                  | . |
| Vv19g0577          | Tc07_g004490       | Gorai.013G163000.1 | .                  | .                  | . |
| Gorai.002G084300.1 | .                  | .                  | .                  | .                  | . |
| .                  | .                  | .                  | .                  | .                  | . |
| Vv19g0578          | Tc07_g004480       | .                  | .                  | Gorai.002G084500.1 | . |
| .                  | .                  | .                  | .                  | .                  | . |
| Vv19g0579          | .                  | .                  | Gorai.002G084700.1 | .                  | . |
| .                  | Vv010rg0114        | .                  | .                  | .                  | . |
| .                  | .                  | .                  | .                  | .                  | . |
| Vv19g0580          | Tc07_g004470       | .                  | .                  | Gorai.002G084800.1 | . |
| Gorai.009G425700.1 | .                  | .                  | .                  | .                  | . |
| .                  | .                  | .                  | .                  | .                  | . |
| Vv19g0581          | .                  | .                  | .                  | .                  | . |
| .                  | .                  | .                  | .                  | .                  | . |
| Vv19g0582          | .                  | .                  | .                  | .                  | . |
| .                  | .                  | .                  | .                  | .                  | . |
| Vv19g0583          | .                  | .                  | .                  | .                  | . |
| .                  | .                  | .                  | .                  | .                  | . |
| Vv19g0584          | Tc07_g004340       | Gorai.013G161500.1 | Gorai.             | .                  | . |
| 007G313700.1       | Gorai.002G085200.1 | Gorai.009G425600.1 | .                  | .                  | . |
| Vv010rg0110        | .                  | .                  | .                  | .                  | . |
| .                  | .                  | .                  | .                  | .                  | . |
| Vv19g0585          | Tc07_g004320       | Gorai.013G161300.1 | .                  | .                  | . |
| Gorai.009G425500.1 | .                  | .                  | .                  | .                  | . |
| .                  | .                  | .                  | .                  | .                  | . |
| Vv19g0586          | .                  | .                  | .                  | .                  | . |
| .                  | .                  | .                  | .                  | .                  | . |
| Vv19g0587          | Tc07_g004270       | .                  | .                  | Gorai.002G085600.1 | . |
| .                  | .                  | .                  | .                  | .                  | . |
| .                  | .                  | .                  | .                  | .                  | . |
| Vv19g0588          | .                  | .                  | Gorai.002G085700.1 | .                  | . |
| Gorai.009G422600.1 | .                  | .                  | .                  | .                  | . |
| .                  | .                  | .                  | .                  | .                  | . |
| .                  | .                  | .                  | .                  | .                  | . |

|                    |                    |                    |                    |                    |        |
|--------------------|--------------------|--------------------|--------------------|--------------------|--------|
| Vv19g0589          | Tc07_g004240       | .                  | .                  | .                  | Gorai. |
| 009G425200.1       | .                  | .                  | .                  | .                  | .      |
| .                  | .                  | .                  | .                  | .                  | .      |
| Vv19g0590          | .                  | .                  | .                  | .                  | .      |
| .                  | .                  | .                  | .                  | .                  | .      |
| Vv19g0591          | .                  | .                  | .                  | .                  | .      |
| .                  | .                  | .                  | .                  | .                  | .      |
| Vv19g0592          | .                  | .                  | .                  | .                  | .      |
| .                  | .                  | .                  | .                  | .                  | .      |
| Vv19g0593          | .                  | .                  | .                  | .                  | .      |
| .                  | .                  | .                  | .                  | .                  | .      |
| Vv19g0594          | Tc07_g004220       | Gorai.013G160800.1 | .                  | .                  | .      |
| Gorai.002G086800.1 | Gorai.009G434900.1 | .                  | .                  | .                  | .      |
| .                  | .                  | .                  | .                  | .                  | .      |
| Vv19g0595          | Tc07_g004200       | .                  | .                  | Gorai.002G087300.1 | .      |
| .                  | .                  | .                  | .                  | .                  | .      |
| Vv19g0596          | Tc07_g004170       | Gorai.013G160700.1 | Gorai.             | .                  | .      |
| 007G313400.1       | Gorai.002G087400.1 | .                  | Vv010rg0088        | .                  | .      |
| .                  | .                  | .                  | .                  | .                  | .      |
| Vv19g0597          | Tc07_g004130       | Gorai.013G160500.1 | .                  | .                  | .      |
| Gorai.002G087500.1 | .                  | .                  | .                  | .                  | .      |
| .                  | .                  | .                  | .                  | .                  | .      |
| Vv19g0598          | Tc07_g004120       | Gorai.013G160400.1 | .                  | .                  | .      |
| .                  | .                  | .                  | .                  | .                  | .      |
| Vv19g0599          | .                  | .                  | Gorai.002G087600.1 | .                  | .      |
| .                  | .                  | .                  | .                  | .                  | .      |
| Vv19g0600          | .                  | .                  | Gorai.002G087700.1 | .                  | .      |
| .                  | .                  | .                  | .                  | .                  | .      |
| Vv19g0601          | .                  | .                  | Gorai.002G087800.1 | .                  | .      |
| Gorai.009G435000.1 | .                  | .                  | .                  | .                  | .      |
| .                  | .                  | .                  | .                  | .                  | .      |
| Vv19g0602          | Tc07_g004110       | .                  | .                  | .                  | .      |
| .                  | .                  | .                  | .                  | .                  | .      |
| Vv19g0603          | Tc07_g004100       | .                  | .                  | .                  | .      |
| .                  | .                  | .                  | .                  | .                  | .      |
| Vv19g0604          | Tc07_g004090       | .                  | .                  | .                  | .      |



|                    |              |                    |   |   |                    |   |   |
|--------------------|--------------|--------------------|---|---|--------------------|---|---|
| .                  | .            | .                  | . | . | .                  | . | . |
| .                  | .            | .                  | . | . | .                  | . | . |
| Vv19g0605          | .            | .                  | . | . | .                  | . | . |
| .                  | .            | .                  | . | . | .                  | . | . |
| Vv19g0606          | .            | .                  | . | . | .                  | . | . |
| .                  | .            | .                  | . | . | .                  | . | . |
| Vv19g0607          | Tc07_g004080 | .                  | . | . | Gorai.002G087900.1 | . | . |
| .                  | .            | .                  | . | . | .                  | . | . |
| Vv19g0608          | .            | .                  | . | . | .                  | . | . |
| .                  | .            | .                  | . | . | .                  | . | . |
| Vv19g0609          | Tc07_g004070 | .                  | . | . | Gorai.002G088000.1 | . | . |
| Gorai.009G435100.1 | .            | .                  | . | . | .                  | . | . |
| .                  | .            | .                  | . | . | .                  | . | . |
| Vv19g0610          | Tc07_g004060 | .                  | . | . | Gorai.             | . | . |
| 009G435200.1       | .            | .                  | . | . | .                  | . | . |
| .                  | .            | .                  | . | . | .                  | . | . |
| Vv19g0611          | Tc07_g004050 | .                  | . | . | Gorai.             | . | . |
| 009G435300.1       | .            | .                  | . | . | .                  | . | . |
| .                  | .            | .                  | . | . | .                  | . | . |
| Vv19g0612          | Tc07_g004010 | Gorai.013G160300.1 | . | . | .                  | . | . |
| .                  | .            | .                  | . | . | .                  | . | . |
| Vv19g0613          | Tc07_g004000 | .                  | . | . | Gorai.             | . | . |
| 009G435900.1       | .            | .                  | . | . | .                  | . | . |
| .                  | .            | .                  | . | . | .                  | . | . |
| Vv19g0614          | .            | .                  | . | . | .                  | . | . |
| Vv010rg0027        | .            | .                  | . | . | .                  | . | . |
| .                  | .            | .                  | . | . | .                  | . | . |
| Vv19g0615          | .            | .                  | . | . | .                  | . | . |
| .                  | .            | .                  | . | . | .                  | . | . |
| Vv19g0616          | .            | .                  | . | . | .                  | . | . |
| .                  | .            | .                  | . | . | .                  | . | . |
| Vv19g0617          | Tc07_g003700 | Gorai.013G160200.1 | . | . | .                  | . | . |
| Gorai.002G088100.1 | .            | Gorai.004G028000.1 | . | . | .                  | . | . |
| .                  | .            | .                  | . | . | .                  | . | . |
| Vv19g0618          | Tc07_g003610 | .                  | . | . | Gorai.             | . | . |
| 009G437700.1       | .            | .                  | . | . | .                  | . | . |
| .                  | .            | .                  | . | . | .                  | . | . |
| Vv19g0619          | .            | .                  | . | . | .                  | . | . |
| .                  | .            | .                  | . | . | .                  | . | . |
| Vv19g0620          | Tc07_g003600 | .                  | . | . | Gorai.             | . | . |

|                    |                    |                    |        |                    |   |   |
|--------------------|--------------------|--------------------|--------|--------------------|---|---|
| 009G437800.1       | .                  | .                  | .      | .                  | . | . |
| Vv19g0621          | Tc07_g003590       | Gorai.013G160100.1 | .      | .                  | . | . |
| .                  | .                  | .                  | .      | .                  | . | . |
| Vv19g0622          | Tc07_g003570       | .                  | .      | Gorai.002G088200.1 | . | . |
| .                  | .                  | .                  | .      | .                  | . | . |
| Vv19g0623          | Tc07_g003510       | .                  | .      | .                  | . | . |
| Gorai.004G027900.1 | .                  | .                  | .      | .                  | . | . |
| .                  | .                  | .                  | .      | .                  | . | . |
| Vv19g0624          | Tc07_g003490       | .                  | .      | .                  | . | . |
| Gorai.004G027700.1 | .                  | .                  | .      | .                  | . | . |
| .                  | .                  | .                  | .      | .                  | . | . |
| Vv19g0625          | Tc07_g003440       | .                  | .      | Gorai.002G088300.1 | . | . |
| Gorai.009G438000.1 | .                  | .                  | .      | .                  | . | . |
| .                  | .                  | .                  | .      | .                  | . | . |
| .                  | .                  | .                  | .      | .                  | . | . |
| Vv19g0626          | Tc07_g003430       | Gorai.013G160000.1 | Gorai. | .                  | . | . |
| 007G313300.1       | Gorai.002G088400.1 | Gorai.009G438100.1 | .      | .                  | . | . |
| Vv010rg0033        | .                  | .                  | .      | .                  | . | . |
| .                  | .                  | .                  | .      | .                  | . | . |
| Vv19g0627          | Tc07_g003390       | .                  | .      | Gorai.002G088500.1 | . | . |
| .                  | .                  | .                  | .      | .                  | . | . |
| .                  | .                  | .                  | .      | .                  | . | . |
| Vv19g0628          | Tc07_g003380       | Gorai.013G159800.1 | .      | .                  | . | . |
| Gorai.002G088600.1 | .                  | .                  | .      | .                  | . | . |
| .                  | .                  | .                  | .      | .                  | . | . |
| .                  | .                  | .                  | .      | .                  | . | . |
| Vv19g0629          | Tc07_g003370       | Gorai.013G159600.1 | Gorai. | .                  | . | . |
| 007G310400.1       | Gorai.002G088700.1 | Gorai.009G438200.1 | .      | .                  | . | . |
| .                  | .                  | .                  | .      | .                  | . | . |
| .                  | .                  | .                  | .      | .                  | . | . |
| Vv19g0630          | .                  | .                  | .      | .                  | . | . |
| .                  | .                  | .                  | .      | .                  | . | . |
| .                  | .                  | .                  | .      | .                  | . | . |
| Vv19g0631          | Tc07_g003300       | .                  | .      | Gorai.002G088800.1 | . | . |
| Gorai.009G438300.1 | .                  | .                  | .      | .                  | . | . |
| .                  | .                  | .                  | .      | .                  | . | . |
| .                  | .                  | .                  | .      | .                  | . | . |
| Vv19g0632          | Tc07_g003290       | .                  | .      | Gorai.002G088900.1 | . | . |
| .                  | Gorai.004G024800.1 | .                  | .      | .                  | . | . |
| .                  | .                  | .                  | .      | .                  | . | . |
| .                  | .                  | .                  | .      | .                  | . | . |
| Vv19g0633          | .                  | .                  | .      | .                  | . | . |
| .                  | .                  | .                  | .      | .                  | . | . |
| .                  | .                  | .                  | .      | .                  | . | . |
| Vv19g0634          | Tc07_g003280       | .                  | .      | Gorai.             | . | . |
| 009G438500.1       | .                  | .                  | .      | .                  | . | . |
| .                  | .                  | .                  | .      | .                  | . | . |

|                    |              |                    |   |                    |
|--------------------|--------------|--------------------|---|--------------------|
| Vv19g0635          | Tc07_g003270 | .                  | . | Gorai.002G089000.1 |
| .                  | .            | .                  | . | .                  |
| .                  | .            | .                  | . | .                  |
| Vv19g0636          | Tc07_g003250 | .                  | . | Gorai.             |
| 009G439700.1       | .            | .                  | . | .                  |
| .                  | .            | .                  | . | .                  |
| Vv19g0637          | Tc07_g003240 | .                  | . | Gorai.002G089200.1 |
| .                  | .            | .                  | . | .                  |
| .                  | .            | .                  | . | .                  |
| Vv19g0638          | Tc07_g003230 | .                  | . | Gorai.002G089300.1 |
| .                  | Vv010rg0041  | .                  | . | .                  |
| .                  | .            | .                  | . | .                  |
| .                  | .            | .                  | . | .                  |
| Vv19g0639          | .            | .                  | . | .                  |
| .                  | .            | .                  | . | .                  |
| .                  | .            | .                  | . | .                  |
| Vv19g0640          | Tc07_g003170 | Gorai.013G159500.1 | . | .                  |
| Gorai.002G089500.1 | .            | Vv010rg0043        | . | .                  |
| .                  | .            | .                  | . | .                  |
| .                  | .            | .                  | . | .                  |
| Vv19g0641          | Tc07_g003160 | .                  | . | Gorai.002G089600.1 |
| Gorai.009G440100.1 | .            | .                  | . | .                  |
| .                  | .            | .                  | . | .                  |
| .                  | .            | .                  | . | .                  |
| Vv19g0642          | Tc07_g003130 | .                  | . | Gorai.002G089700.1 |
| Gorai.009G440200.1 | .            | Vv12g0650          | . | .                  |
| .                  | .            | Vv010rg0044        | . | .                  |
| .                  | .            | .                  | . | .                  |
| Vv19g0643          | .            | .                  | . | .                  |
| .                  | .            | .                  | . | .                  |
| .                  | .            | .                  | . | .                  |
| Vv19g0644          | Tc07_g003120 | .                  | . | Gorai.             |
| 009G440300.1       | .            | .                  | . | .                  |
| .                  | .            | .                  | . | .                  |
| .                  | .            | .                  | . | .                  |
| Vv19g0645          | .            | .                  | . | .                  |
| Vv12g0649          | .            | .                  | . | .                  |
| Vv010rg0046        | .            | .                  | . | .                  |
| Vv19g0646          | Tc07_g003060 | Gorai.013G159200.1 | . | .                  |
| Gorai.002G089900.1 | .            | Gorai.004G029000.1 | . | .                  |
| .                  | .            | .                  | . | .                  |
| .                  | .            | .                  | . | .                  |
| Vv19g0647          | Tc07_g003050 | .                  | . | Gorai.             |
| 009G440400.1       | .            | .                  | . | .                  |
| .                  | .            | .                  | . | .                  |
| .                  | .            | .                  | . | .                  |
| Vv19g0648          | Tc07_g003040 | .                  | . | Gorai.002G090100.1 |
| .                  | .            | .                  | . | .                  |
| .                  | .            | .                  | . | .                  |
| Vv19g0649          | Tc07_g003030 | .                  | . | .                  |
| .                  | .            | .                  | . | .                  |
| .                  | .            | .                  | . | .                  |
| Vv010rg0051        | .            | .                  | . | .                  |

|                    |                    |                    |   |   |   |                    |   |
|--------------------|--------------------|--------------------|---|---|---|--------------------|---|
| Vv19g0650          | .                  | .                  | . | . | . | .                  | . |
| .                  | .                  | .                  | . | . | . | .                  | . |
| .                  | .                  | .                  | . | . | . | .                  | . |
| Vv19g0651          | Tc07_g003020       | Gorai.013G158800.1 | . | . | . | .                  | . |
| Gorai.002G090200.1 | Gorai.009G440500.1 | .                  | . | . | . | .                  | . |
| .                  | .                  | .                  | . | . | . | .                  | . |
| .                  | .                  | .                  | . | . | . | .                  | . |
| Vv19g0652          | Tc07_g003010       | .                  | . | . | . | Gorai.             | . |
| 009G440700.1       | .                  | .                  | . | . | . | .                  | . |
| .                  | .                  | .                  | . | . | . | .                  | . |
| Vv19g0653          | .                  | .                  | . | . | . | .                  | . |
| .                  | .                  | .                  | . | . | . | .                  | . |
| .                  | .                  | .                  | . | . | . | .                  | . |
| Vv19g0654          | .                  | .                  | . | . | . | .                  | . |
| .                  | .                  | .                  | . | . | . | .                  | . |
| .                  | .                  | .                  | . | . | . | .                  | . |
| Vv19g0655          | .                  | .                  | . | . | . | .                  | . |
| .                  | .                  | .                  | . | . | . | .                  | . |
| .                  | .                  | .                  | . | . | . | .                  | . |
| Vv19g0656          | Tc07_g003000       | .                  | . | . | . | Gorai.002G090300.1 | . |
| Gorai.009G440800.1 | .                  | .                  | . | . | . | .                  | . |
| .                  | .                  | .                  | . | . | . | .                  | . |
| .                  | .                  | .                  | . | . | . | .                  | . |
| Vv19g0657          | Tc07_g002990       | .                  | . | . | . | Gorai.002G090400.1 | . |
| .                  | .                  | .                  | . | . | . | .                  | . |
| .                  | .                  | .                  | . | . | . | .                  | . |
| Vv19g0658          | .                  | .                  | . | . | . | .                  | . |
| .                  | .                  | .                  | . | . | . | .                  | . |
| .                  | .                  | .                  | . | . | . | .                  | . |
| Vv19g0659          | Tc07_g002970       | .                  | . | . | . | Gorai.             | . |
| 009G441000.1       | Gorai.004G031700.1 | .                  | . | . | . | .                  | . |
| .                  | .                  | Vv010rg0065        | . | . | . | .                  | . |
| .                  | .                  | .                  | . | . | . | .                  | . |
| Vv19g0660          | .                  | .                  | . | . | . | .                  | . |
| .                  | .                  | .                  | . | . | . | Vv010rg0068        | . |
| .                  | .                  | .                  | . | . | . | .                  | . |
| Vv19g0661          | .                  | Gorai.007G173400.1 | . | . | . | .                  | . |
| .                  | .                  | .                  | . | . | . | .                  | . |
| .                  | .                  | .                  | . | . | . | .                  | . |
| Vv19g0662          | Tc07_g002960       | .                  | . | . | . | .                  | . |
| .                  | .                  | .                  | . | . | . | .                  | . |
| Vv010rg0071        | .                  | .                  | . | . | . | .                  | . |
| Vv19g0663          | .                  | .                  | . | . | . | .                  | . |
| .                  | .                  | .                  | . | . | . | Vv010rg0073        | . |
| .                  | .                  | .                  | . | . | . | .                  | . |
| Vv19g0664          | .                  | .                  | . | . | . | .                  | . |
| .                  | .                  | .                  | . | . | . | .                  | . |
| .                  | .                  | .                  | . | . | . | .                  | . |
| Vv19g0665          | Tc07_g002940       | .                  | . | . | . | Gorai.002G091000.1 | . |
| .                  | .                  | .                  | . | . | . | .                  | . |

|                    |                    |                    |                    |                    |
|--------------------|--------------------|--------------------|--------------------|--------------------|
| Vv19g0666          | Tc07_g002930       | .                  | .                  | Gorai.002G091100.1 |
| .                  | Gorai.004G031800.1 | .                  | .                  | .                  |
| .                  | .                  | Vv010rg0079        | .                  | .                  |
| Vv19g0667          | Tc07_g002910       | .                  | Gorai.007G171900.1 | .                  |
| Gorai.002G091300.1 | .                  | .                  | Vv12g0629          | .                  |
| Tc01_g017430       | Gorai.007G171900.1 | .                  | Gorai.001G213700.1 | .                  |
| .                  | Gorai.001G094300.1 | .                  | Vv010rg0082        | .                  |
| Vv19g0668          | Tc07_g002900       | .                  | .                  | Gorai.             |
| 009G441100.1       | .                  | .                  | .                  | .                  |
| Vv19g0669          | Tc07_g002890       | .                  | .                  | .                  |
| .                  | .                  | .                  | .                  | .                  |
| Vv19g0670          | .                  | .                  | Gorai.002G091400.1 | .                  |
| .                  | .                  | .                  | .                  | .                  |
| Vv19g0671          | Tc07_g002870       | .                  | .                  | Gorai.002G091700.1 |
| .                  | .                  | .                  | .                  | .                  |
| Vv19g0672          | Tc07_g002840       | .                  | .                  | Gorai.             |
| 009G441700.1       | .                  | .                  | .                  | .                  |
| .                  | Vv010rg0089        | .                  | .                  | .                  |
| Vv19g0673          | Tc07_g002830       | .                  | .                  | Gorai.             |
| 009G441800.1       | .                  | .                  | .                  | .                  |
| Vv19g0674          | .                  | .                  | .                  | .                  |
| Vv12g0613          | .                  | Gorai.001G215000.1 | .                  | .                  |
| Vv19g0675          | Tc07_g002820       | .                  | Gorai.007G171400.1 | .                  |
| Gorai.009G441900.1 | .                  | Gorai.004G032000.1 | .                  | .                  |
| .                  | .                  | .                  | .                  | .                  |
| Vv19g0676          | Tc07_g002800       | .                  | .                  | Gorai.002G092100.1 |
| .                  | .                  | .                  | .                  | .                  |
| Vv19g0677          | Tc07_g002780       | .                  | .                  | .                  |
| Vv12g0608          | .                  | .                  | .                  | .                  |
| Gorai.001G094600.1 | .                  | .                  | .                  | .                  |
| Vv19g0678          | Tc07_g002770       | Gorai.013G158700.1 | .                  | .                  |
| .                  | Vv12g0607          | .                  | .                  | .                  |
| Gorai.001G197700.1 | .                  | .                  | .                  | .                  |
| Vv19g0679          | .                  | .                  | .                  | .                  |
| .                  | .                  | .                  | .                  | .                  |
| .                  | .                  | .                  | .                  | .                  |

|                    |                    |                    |                    |        |   |
|--------------------|--------------------|--------------------|--------------------|--------|---|
| Vv19g0680          | Tc07_g002760       | Gorai.013G158600.1 | .                  | .      | . |
| Gorai.002G092200.1 | Gorai.009G442000.1 | .                  | .                  | .      | . |
| .                  | .                  | .                  | .                  | .      | . |
| .                  | .                  | .                  | .                  | .      | . |
| Vv19g0681          | .                  | .                  | .                  | .      | . |
| .                  | .                  | .                  | .                  | .      | . |
| .                  | .                  | .                  | .                  | .      | . |
| Vv19g0682          | Tc07_g002720       | .                  | .                  | Gorai. | . |
| 009G442200.1       | .                  | .                  | .                  | .      | . |
| .                  | .                  | .                  | .                  | .      | . |
| Vv19g0683          | Tc07_g002680       | .                  | Gorai.007G170600.1 | .      | . |
| Gorai.002G092400.1 | .                  | .                  | Vv12g0589          | .      | . |
| Tc01_g030880       | Gorai.007G170600.1 | .                  | .                  | .      | . |
| Gorai.001G095700.1 | .                  | .                  | .                  | .      | . |
| .                  | .                  | .                  | .                  | .      | . |
| Vv19g0684          | .                  | .                  | .                  | .      | . |
| .                  | .                  | .                  | .                  | .      | . |
| .                  | .                  | .                  | .                  | .      | . |
| Vv19g0685          | Tc07_g002650       | .                  | Gorai.002G092600.1 | .      | . |
| Gorai.009G442700.1 | .                  | .                  | Vv12g0581          | .      | . |
| Tc01_g017650       | Gorai.001G216900.1 | .                  | .                  | .      | . |
| .                  | .                  | .                  | .                  | .      | . |
| .                  | .                  | .                  | .                  | .      | . |
| Vv19g0686          | .                  | .                  | .                  | .      | . |
| .                  | .                  | .                  | .                  | .      | . |
| .                  | .                  | .                  | .                  | .      | . |
| Vv19g0687          | Tc07_g002620       | Gorai.013G158300.1 | .                  | .      | . |
| Gorai.002G093000.1 | Gorai.009G443500.1 | .                  | .                  | .      | . |
| .                  | .                  | .                  | .                  | .      | . |
| .                  | .                  | .                  | .                  | .      | . |
| Vv19g0688          | Tc07_g002600       | .                  | Gorai.002G093200.1 | .      | . |
| .                  | .                  | .                  | .                  | .      | . |
| .                  | .                  | .                  | .                  | .      | . |
| Vv19g0689          | .                  | .                  | .                  | .      | . |
| .                  | .                  | .                  | .                  | .      | . |
| .                  | .                  | .                  | .                  | .      | . |
| Vv19g0690          | Tc07_g002570       | Gorai.013G157800.1 | .                  | .      | . |
| Gorai.002G093300.1 | .                  | .                  | .                  | .      | . |
| .                  | .                  | .                  | .                  | .      | . |
| .                  | .                  | .                  | .                  | .      | . |
| Vv19g0691          | Tc07_g002560       | .                  | .                  | .      | . |
| .                  | .                  | .                  | .                  | .      | . |
| .                  | .                  | .                  | .                  | .      | . |
| Vv19g0692          | .                  | .                  | .                  | .      | . |
| Vv12g0551          | Tc01_g017990       | .                  | .                  | .      | . |
| .                  | .                  | .                  | .                  | .      | . |
| Vv19g0693          | Tc07_g002550       | .                  | Gorai.002G093400.1 | .      | . |
| Gorai.009G443600.1 | .                  | .                  | .                  | .      | . |
| .                  | .                  | .                  | .                  | .      | . |
| .                  | .                  | .                  | .                  | .      | . |
| Vv19g0694          | .                  | .                  | .                  | .      | . |

|                    |                    |                    |   |   |                    |   |   |
|--------------------|--------------------|--------------------|---|---|--------------------|---|---|
| .                  | .                  | .                  | . | . | .                  | . | . |
| .                  | .                  | .                  | . | . | .                  | . | . |
| Vv19g0695          | Tc07_g002540       | .                  | . | . | Gorai.002G093500.1 | . | . |
| .                  | .                  | .                  | . | . | .                  | . | . |
| .                  | .                  | .                  | . | . | .                  | . | . |
| Vv19g0696          | Tc07_g002530       | .                  | . | . | Gorai.002G093600.1 | . | . |
| .                  | .                  | .                  | . | . | .                  | . | . |
| .                  | .                  | .                  | . | . | .                  | . | . |
| Vv19g0697          | Tc07_g002520       | .                  | . | . | Gorai.002G093700.1 | . | . |
| .                  | Gorai.004G032600.1 | .                  | . | . | .                  | . | . |
| .                  | .                  | .                  | . | . | .                  | . | . |
| .                  | .                  | .                  | . | . | .                  | . | . |
| Vv19g0698          | .                  | .                  | . | . | .                  | . | . |
| .                  | .                  | .                  | . | . | .                  | . | . |
| .                  | .                  | .                  | . | . | .                  | . | . |
| Vv19g0699          | Tc07_g002510       | .                  | . | . | Gorai.             | . | . |
| 009G443700.1       | .                  | .                  | . | . | .                  | . | . |
| .                  | .                  | .                  | . | . | .                  | . | . |
| .                  | .                  | .                  | . | . | .                  | . | . |
| Vv19g0700          | Gorai.013G157400.1 | .                  | . | . | Gorai.             | . | . |
| 002G093800.1       | .                  | .                  | . | . | .                  | . | . |
| .                  | .                  | .                  | . | . | .                  | . | . |
| .                  | .                  | .                  | . | . | .                  | . | . |
| Vv19g0701          | Tc07_g002500       | .                  | . | . | Gorai.002G093900.1 | . | . |
| Gorai.009G443800.1 | .                  | .                  | . | . | .                  | . | . |
| .                  | .                  | .                  | . | . | .                  | . | . |
| .                  | .                  | .                  | . | . | .                  | . | . |
| Vv19g0702          | Tc07_g002480       | .                  | . | . | Gorai.002G094100.1 | . | . |
| .                  | .                  | .                  | . | . | .                  | . | . |
| .                  | .                  | .                  | . | . | .                  | . | . |
| Vv19g0703          | Tc07_g002470       | .                  | . | . | .                  | . | . |
| Gorai.004G032700.1 | .                  | .                  | . | . | .                  | . | . |
| .                  | .                  | .                  | . | . | .                  | . | . |
| Vv19g0704          | Tc07_g002460       | Gorai.013G157300.1 | . | . | Gorai.             | . | . |
| 007G169100.1       | .                  | Vv12g0545          | . | . | .                  | . | . |
| Gorai.007G169100.1 | .                  | .                  | . | . | .                  | . | . |
| .                  | .                  | .                  | . | . | .                  | . | . |
| Vv19g0705          | Tc07_g002450       | .                  | . | . | Gorai.             | . | . |
| 009G443900.1       | .                  | .                  | . | . | .                  | . | . |
| .                  | .                  | .                  | . | . | .                  | . | . |
| Vv19g0706          | Gorai.013G157200.1 | .                  | . | . | .                  | . | . |
| .                  | .                  | .                  | . | . | .                  | . | . |
| .                  | .                  | .                  | . | . | .                  | . | . |
| Vv19g0707          | .                  | .                  | . | . | Gorai.009G444600.1 | . | . |
| .                  | .                  | .                  | . | . | .                  | . | . |
| .                  | .                  | .                  | . | . | .                  | . | . |
| Vv19g0708          | .                  | .                  | . | . | .                  | . | . |
| .                  | .                  | .                  | . | . | .                  | . | . |
| .                  | .                  | .                  | . | . | .                  | . | . |
| Vv19g0709          | Tc07_g002330       | .                  | . | . | .                  | . | . |
| .                  | .                  | .                  | . | . | .                  | . | . |

|                    |                    |   |                    |   |        |
|--------------------|--------------------|---|--------------------|---|--------|
| Vv19g0710          | .                  | . | Gorai.013G156900.1 | . | Gorai. |
| 002G094200.1       | .                  | . | .                  | . | .      |
| .                  | .                  | . | .                  | . | .      |
| Vv19g0711          | .                  | . | .                  | . | Gorai. |
| 004G032800.1       | .                  | . | .                  | . | .      |
| .                  | .                  | . | .                  | . | .      |
| Vv19g0712          | .                  | . | .                  | . | .      |
| .                  | .                  | . | .                  | . | .      |
| Vv19g0713          | .                  | . | .                  | . | .      |
| .                  | .                  | . | .                  | . | .      |
| Vv19g0714          | .                  | . | .                  | . | .      |
| .                  | .                  | . | .                  | . | .      |
| Vv19g0715          | .                  | . | .                  | . | .      |
| .                  | .                  | . | .                  | . | .      |
| Vv19g0716          | .                  | . | .                  | . | .      |
| .                  | .                  | . | .                  | . | .      |
| Vv19g0717          | .                  | . | .                  | . | .      |
| .                  | .                  | . | .                  | . | .      |
| Vv19g0718          | .                  | . | .                  | . | .      |
| .                  | .                  | . | .                  | . | .      |
| Vv19g0719          | .                  | . | .                  | . | .      |
| .                  | .                  | . | .                  | . | .      |
| Vv19g0720          | Tc07_g002270       | . | Gorai.013G156700.1 | . | .      |
| Gorai.002G094400.1 | Gorai.009G445100.1 | . | .                  | . | .      |
| .                  | .                  | . | .                  | . | .      |
| Vv19g0721          | Tc07_g002250       | . | Gorai.007G168700.1 | . | .      |
| Gorai.002G094500.1 | .                  | . | .                  | . | .      |
| .                  | .                  | . | .                  | . | .      |
| Vv19g0722          | Tc07_g002240       | . | Gorai.007G311700.1 | . | .      |
| Gorai.002G094600.1 | .                  | . | .                  | . | .      |
| .                  | .                  | . | .                  | . | .      |
| Vv19g0723          | .                  | . | .                  | . | .      |
| .                  | .                  | . | .                  | . | .      |
| Vv19g0724          | .                  | . | .                  | . | .      |
| .                  | .                  | . | .                  | . | .      |
| .                  | .                  | . | .                  | . | .      |



|                    |                    |                    |        |   |                    |   |   |
|--------------------|--------------------|--------------------|--------|---|--------------------|---|---|
| Vv19g0725          | .                  | .                  | .      | . | .                  | . | . |
| .                  | .                  | .                  | .      | . | .                  | . | . |
| Vv19g0726          | Tc07_g002220       | .                  | .      | . | Gorai.002G094800.1 | . | . |
| .                  | .                  | .                  | .      | . | .                  | . | . |
| Vv19g0727          | Tc07_g002210       | .                  | .      | . | Gorai.002G094900.1 | . | . |
| Gorai.009G445400.1 | .                  | .                  | .      | . | .                  | . | . |
| .                  | .                  | .                  | .      | . | .                  | . | . |
| Vv19g0728          | .                  | .                  | .      | . | .                  | . | . |
| .                  | .                  | .                  | .      | . | .                  | . | . |
| Vv19g0729          | .                  | .                  | .      | . | .                  | . | . |
| .                  | .                  | .                  | .      | . | .                  | . | . |
| Vv19g0730          | Tc07_g002200       | .                  | .      | . | .                  | . | . |
| Vv12g0860          | .                  | .                  | .      | . | .                  | . | . |
| .                  | .                  | .                  | .      | . | .                  | . | . |
| Vv19g0731          | Tc07_g002170       | .                  | .      | . | Gorai.002G095100.1 | . | . |
| Gorai.009G445500.1 | .                  | .                  | .      | . | .                  | . | . |
| .                  | .                  | .                  | .      | . | .                  | . | . |
| Vv19g0732          | .                  | .                  | .      | . | .                  | . | . |
| .                  | .                  | .                  | .      | . | .                  | . | . |
| Vv19g0733          | Tc07_g002160       | .                  | .      | . | Gorai.002G095200.1 | . | . |
| Gorai.009G445600.1 | .                  | .                  | .      | . | .                  | . | . |
| .                  | .                  | .                  | .      | . | .                  | . | . |
| Vv19g0734          | .                  | .                  | .      | . | .                  | . | . |
| Vv12g0854          | .                  | .                  | .      | . | .                  | . | . |
| .                  | .                  | .                  | .      | . | .                  | . | . |
| Vv19g0735          | .                  | .                  | .      | . | .                  | . | . |
| .                  | .                  | .                  | .      | . | .                  | . | . |
| Vv19g0736          | Tc07_g002140       | Gorai.013G156600.1 | Gorai. | . | .                  | . | . |
| 007G311600.1       | Gorai.002G095300.1 | Gorai.009G445800.1 | .      | . | .                  | . | . |
| Gorai.004G033000.1 | .                  | .                  | .      | . | .                  | . | . |
| .                  | .                  | .                  | .      | . | .                  | . | . |
| Vv19g0737          | .                  | .                  | .      | . | .                  | . | . |
| .                  | .                  | .                  | .      | . | .                  | . | . |
| Vv19g0738          | Tc07_g002130       | .                  | .      | . | Gorai.002G095400.1 | . | . |
| .                  | .                  | .                  | .      | . | .                  | . | . |
| Vv19g0739          | Tc07_g002100       | Gorai.013G156500.1 | Gorai. | . | .                  | . | . |
| 007G311300.1       | Gorai.002G095600.1 | .                  | .      | . | .                  | . | . |
| .                  | .                  | .                  | .      | . | .                  | . | . |
| .                  | .                  | .                  | .      | . | .                  | . | . |

|                    |                    |                    |                    |   |
|--------------------|--------------------|--------------------|--------------------|---|
| Vv19g0740          | Tc07_g002090       | Gorai.013G156400.1 | .                  | . |
| .                  | .                  | .                  | .                  | . |
| .                  | .                  | .                  | .                  | . |
| Vv19g0741          | Tc07_g002070       | Gorai.013G156200.1 | .                  | . |
| Gorai.002G095700.1 | Gorai.009G445900.1 | .                  | Vv12g0850          | . |
| .                  | .                  | .                  | .                  | . |
| .                  | .                  | .                  | .                  | . |
| Vv19g0742          | .                  | .                  | .                  | . |
| .                  | .                  | .                  | .                  | . |
| .                  | .                  | .                  | .                  | . |
| Vv19g0743          | Tc07_g002060       | .                  | Gorai.002G095800.1 | . |
| .                  | .                  | .                  | .                  | . |
| .                  | .                  | .                  | .                  | . |
| Vv19g0744          | .                  | Gorai.007G167500.1 | Gorai.             | . |
| 002G095900.1       | Gorai.009G446000.1 | .                  | .                  | . |
| .                  | .                  | .                  | .                  | . |
| .                  | .                  | .                  | .                  | . |
| Vv19g0745          | Tc07_g002050       | Gorai.013G156100.1 | .                  | . |
| Gorai.002G096000.1 | .                  | .                  | .                  | . |
| .                  | .                  | .                  | .                  | . |
| .                  | .                  | .                  | .                  | . |
| Vv19g0746          | Tc07_g002040       | Gorai.013G156000.1 | .                  | . |
| Gorai.002G096100.1 | .                  | .                  | .                  | . |
| .                  | .                  | .                  | .                  | . |
| .                  | .                  | .                  | .                  | . |
| Vv19g0747          | .                  | Gorai.013G155500.1 | Gorai.             | . |
| 002G096200.1       | .                  | Gorai.004G033200.1 | .                  | . |
| .                  | .                  | .                  | .                  | . |
| .                  | .                  | .                  | .                  | . |
| Vv19g0748          | Tc07_g002020       | .                  | .                  | . |
| .                  | .                  | .                  | .                  | . |
| .                  | .                  | .                  | .                  | . |
| Vv19g0749          | Tc07_g002000       | .                  | Gorai.002G096300.1 | . |
| Gorai.009G446100.1 | .                  | Vv12g0842          | .                  | . |
| Tc01_g018470       | Gorai.007G167000.1 | .                  | .                  | . |
| .                  | .                  | .                  | .                  | . |
| Vv19g0750          | .                  | Gorai.002G096500.1 | .                  | . |
| .                  | .                  | .                  | .                  | . |
| .                  | .                  | .                  | .                  | . |
| Vv19g0751          | .                  | .                  | .                  | . |
| .                  | .                  | .                  | .                  | . |
| .                  | .                  | .                  | .                  | . |
| Vv19g0752          | .                  | .                  | .                  | . |
| .                  | .                  | .                  | .                  | . |
| .                  | .                  | .                  | .                  | . |
| Vv19g0753          | .                  | .                  | .                  | . |
| .                  | .                  | .                  | .                  | . |
| .                  | .                  | .                  | .                  | . |
| Vv19g0754          | Tc07_g001990       | .                  | .                  | . |
| .                  | .                  | .                  | .                  | . |

|                    |                    |                    |                    |           |   |   |
|--------------------|--------------------|--------------------|--------------------|-----------|---|---|
| Vv19g0755          | .                  | .                  | Gorai.013G155100.1 | .         | . | . |
| .                  | .                  | .                  | .                  | .         | . | . |
| Vv19g0756          | .                  | .                  | .                  | .         | . | . |
| .                  | .                  | .                  | .                  | .         | . | . |
| Vv19g0757          | Tc07_g001980       | .                  | Gorai.007G166600.1 | .         | . | . |
| Gorai.002G096600.1 | Gorai.009G446200.1 | .                  | .                  | Vv12g0841 | . | . |
| .                  | .                  | .                  | .                  | .         | . | . |
| Vv19g0758          | Tc07_g001960       | .                  | Gorai.007G311000.1 | .         | . | . |
| .                  | .                  | .                  | .                  | .         | . | . |
| Vv19g0759          | Tc07_g001860       | Gorai.013G154900.1 | .                  | Gorai.    | . | . |
| 007G310900.1       | Gorai.002G097000.1 | .                  | .                  | .         | . | . |
| .                  | .                  | .                  | .                  | .         | . | . |
| Vv19g0760          | .                  | .                  | .                  | .         | . | . |
| .                  | .                  | .                  | .                  | .         | . | . |
| Vv19g0761          | .                  | .                  | .                  | .         | . | . |
| .                  | .                  | .                  | .                  | .         | . | . |
| Vv19g0762          | .                  | .                  | .                  | .         | . | . |
| .                  | .                  | .                  | .                  | .         | . | . |
| Vv19g0763          | Tc07_g001770       | .                  | .                  | .         | . | . |
| .                  | .                  | .                  | .                  | .         | . | . |
| Vv19g0764          | Tc07_g001760       | .                  | .                  | .         | . | . |
| .                  | .                  | .                  | .                  | .         | . | . |
| Vv19g0765          | Tc07_g001750       | .                  | Gorai.007G310700.1 | .         | . | . |
| .                  | .                  | .                  | .                  | .         | . | . |
| Vv19g0766          | .                  | .                  | .                  | .         | . | . |
| .                  | .                  | .                  | .                  | .         | . | . |
| Vv19g0767          | .                  | .                  | .                  | .         | . | . |
| .                  | .                  | .                  | .                  | .         | . | . |
| Vv19g0768          | .                  | .                  | .                  | .         | . | . |
| .                  | .                  | .                  | .                  | .         | . | . |
| Vv19g0769          | .                  | .                  | .                  | .         | . | . |
| .                  | .                  | .                  | .                  | .         | . | . |
| Vv19g0770          | Tc07_g001740       | .                  | .                  | .         | . | . |
| .                  | .                  | .                  | .                  | .         | . | . |

|                    |              |   |                    |                    |   |   |   |
|--------------------|--------------|---|--------------------|--------------------|---|---|---|
| Vv19g0771          | .            | . | .                  | .                  | . | . | . |
| .                  | .            | . | .                  | .                  | . | . | . |
| Vv19g0772          | .            | . | .                  | .                  | . | . | . |
| .                  | .            | . | .                  | .                  | . | . | . |
| Vv19g0773          | Tc07_g001700 | . | Gorai.013G154800.1 | .                  | . | . | . |
| .                  | .            | . | .                  | .                  | . | . | . |
| Vv19g0774          | .            | . | .                  | .                  | . | . | . |
| .                  | .            | . | .                  | .                  | . | . | . |
| Vv19g0775          | Tc07_g001660 | . | Gorai.013G154700.1 | .                  | . | . | . |
| .                  | .            | . | .                  | .                  | . | . | . |
| Vv19g0776          | Tc07_g001630 | . | .                  | Gorai.002G097100.1 | . | . | . |
| .                  | .            | . | .                  | .                  | . | . | . |
| Vv19g0777          | Tc07_g001620 | . | .                  | .                  | . | . | . |
| .                  | .            | . | .                  | .                  | . | . | . |
| Vv19g0778          | Tc07_g001590 | . | .                  | Gorai.002G097300.1 | . | . | . |
| .                  | .            | . | .                  | .                  | . | . | . |
| Vv19g0779          | Tc07_g001580 | . | .                  | Gorai.002G097400.1 | . | . | . |
| .                  | .            | . | .                  | .                  | . | . | . |
| Vv19g0780          | .            | . | .                  | .                  | . | . | . |
| .                  | .            | . | .                  | .                  | . | . | . |
| Vv19g0781          | Tc07_g001560 | . | .                  | Gorai.002G097500.1 | . | . | . |
| .                  | .            | . | .                  | .                  | . | . | . |
| Vv19g0782          | Tc07_g001550 | . | .                  | Gorai.002G097800.1 | . | . | . |
| .                  | .            | . | .                  | .                  | . | . | . |
| Vv19g0783          | Tc07_g001520 | . | Gorai.013G154200.1 | .                  | . | . | . |
| Gorai.002G098400.1 | .            | . | .                  | .                  | . | . | . |
| .                  | .            | . | .                  | .                  | . | . | . |
| Vv19g0784          | .            | . | .                  | .                  | . | . | . |
| .                  | .            | . | .                  | .                  | . | . | . |
| Vv19g0785          | Tc07_g001510 | . | Gorai.007G310400.1 | .                  | . | . | . |
| Gorai.002G098500.1 | .            | . | .                  | .                  | . | . | . |
| .                  | .            | . | .                  | .                  | . | . | . |
| Vv19g0786          | Tc07_g001500 | . | Gorai.013G154000.1 | .                  | . | . | . |
| Gorai.002G098600.1 | .            | . | .                  | .                  | . | . | . |

|                    |              |                    |   |                    |   |   |
|--------------------|--------------|--------------------|---|--------------------|---|---|
| .                  | .            | .                  | . | .                  | . | . |
| .                  | .            | .                  | . | .                  | . | . |
| Vv19g0787          | Tc07_g001490 | .                  | . | Gorai.002G098700.1 | . | . |
| .                  | .            | .                  | . | .                  | . | . |
| .                  | .            | .                  | . | .                  | . | . |
| Vv19g0788          | Tc07_g001480 | Gorai.013G153900.1 | . | .                  | . | . |
| .                  | .            | .                  | . | .                  | . | . |
| .                  | .            | .                  | . | .                  | . | . |
| Vv19g0789          | .            | .                  | . | .                  | . | . |
| .                  | .            | .                  | . | .                  | . | . |
| .                  | .            | .                  | . | .                  | . | . |
| Vv19g0790          | Tc07_g001470 | Gorai.013G153800.1 | . | .                  | . | . |
| Gorai.002G098800.1 | .            | .                  | . | .                  | . | . |
| .                  | .            | .                  | . | .                  | . | . |
| .                  | .            | .                  | . | .                  | . | . |
| Vv19g0791          | Tc07_g001460 | .                  | . | .                  | . | . |
| .                  | .            | .                  | . | .                  | . | . |
| .                  | .            | .                  | . | .                  | . | . |
| Vv19g0792          | .            | .                  | . | .                  | . | . |
| .                  | .            | .                  | . | .                  | . | . |
| .                  | .            | .                  | . | .                  | . | . |
| Vv19g0793          | .            | Gorai.013G153700.1 | . | Gorai.             | . | . |
| 002G098900.1       | .            | .                  | . | .                  | . | . |
| .                  | .            | .                  | . | .                  | . | . |
| .                  | .            | .                  | . | .                  | . | . |
| Vv19g0794          | Tc07_g001450 | .                  | . | .                  | . | . |
| .                  | .            | .                  | . | .                  | . | . |
| .                  | .            | .                  | . | .                  | . | . |
| Vv19g0795          | Tc07_g001440 | .                  | . | .                  | . | . |
| .                  | .            | .                  | . | .                  | . | . |
| .                  | .            | .                  | . | .                  | . | . |
| Vv19g0796          | .            | .                  | . | .                  | . | . |
| .                  | .            | .                  | . | .                  | . | . |
| .                  | .            | .                  | . | .                  | . | . |
| Vv19g0797          | Tc07_g001430 | .                  | . | Gorai.002G099000.1 | . | . |
| Gorai.009G448800.1 | .            | Gorai.004G033300.1 | . | Vv12g0809          | . | . |
| .                  | .            | .                  | . | .                  | . | . |
| .                  | .            | .                  | . | .                  | . | . |
| Vv19g0798          | Tc07_g001390 | .                  | . | Gorai.002G099100.1 | . | . |
| .                  | .            | .                  | . | .                  | . | . |
| .                  | .            | .                  | . | .                  | . | . |
| Vv19g0799          | Tc07_g001380 | Gorai.013G153400.1 | . | .                  | . | . |
| Gorai.002G099200.1 | .            | .                  | . | .                  | . | . |
| .                  | .            | .                  | . | .                  | . | . |
| .                  | .            | .                  | . | .                  | . | . |
| Vv19g0800          | Tc07_g001370 | .                  | . | Gorai.002G099300.1 | . | . |
| .                  | .            | .                  | . | .                  | . | . |
| .                  | .            | .                  | . | .                  | . | . |
| Vv19g0801          | Tc07_g001360 | .                  | . | Gorai.002G099400.1 | . | . |
| .                  | .            | .                  | . | .                  | . | . |



|                    |                    |                    |                    |
|--------------------|--------------------|--------------------|--------------------|
| Vv19g0817          | Tc07_g001240       | Gorai.013G152900.1 | Gorai.             |
| 007G165800.1       | Gorai.002G100100.1 | .                  | Vv12g0795          |
| Tc01_g019010       | Gorai.007G165800.1 | Gorai.001G222400.1 | .                  |
| .                  | .                  | .                  | .                  |
| .                  | .                  | .                  | .                  |
| Vv19g0818          | Tc07_g001220       | Gorai.013G152800.1 | Gorai.             |
| 007G165700.1       | Gorai.002G100400.1 | .                  | Vv12g0788          |
| .                  | .                  | .                  | .                  |
| .                  | .                  | .                  | .                  |
| Vv19g0819          | .                  | .                  | .                  |
| .                  | .                  | .                  | .                  |
| .                  | .                  | .                  | .                  |
| Vv19g0820          | .                  | .                  | .                  |
| .                  | .                  | .                  | .                  |
| .                  | .                  | .                  | .                  |
| Vv19g0821          | Tc07_g001190       | Gorai.013G152600.1 | .                  |
| .                  | .                  | .                  | .                  |
| .                  | .                  | .                  | .                  |
| Vv19g0822          | Tc07_g001180       | Gorai.013G152500.1 | .                  |
| .                  | Gorai.004G033600.1 | .                  | .                  |
| .                  | .                  | .                  | .                  |
| .                  | .                  | .                  | .                  |
| Vv19g0823          | Tc07_g001170       | .                  | .                  |
| Gorai.004G033700.1 | .                  | .                  | .                  |
| .                  | .                  | .                  | .                  |
| Vv19g0824          | .                  | .                  | .                  |
| .                  | .                  | .                  | .                  |
| .                  | .                  | .                  | .                  |
| Vv19g0825          | .                  | .                  | .                  |
| .                  | .                  | .                  | .                  |
| .                  | .                  | .                  | .                  |
| Vv19g0826          | Tc07_g001160       | Gorai.013G152400.1 | .                  |
| Gorai.002G100500.1 | .                  | .                  | .                  |
| .                  | .                  | .                  | .                  |
| .                  | .                  | .                  | .                  |
| Vv19g0827          | Tc07_g001150       | Gorai.013G152300.1 | .                  |
| Gorai.002G100600.1 | .                  | .                  | .                  |
| .                  | .                  | .                  | .                  |
| .                  | .                  | .                  | .                  |
| Vv19g0828          | Tc07_g001130       | Gorai.013G152100.1 | .                  |
| .                  | .                  | .                  | .                  |
| .                  | .                  | .                  | .                  |
| Vv19g0829          | Tc07_g001120       | .                  | Gorai.002G100700.1 |
| .                  | .                  | .                  | .                  |
| .                  | .                  | .                  | .                  |
| Vv19g0830          | Tc07_g001090       | .                  | Gorai.002G100800.1 |
| .                  | .                  | .                  | .                  |
| .                  | .                  | .                  | .                  |
| Vv19g0831          | Tc07_g001080       | Gorai.013G152000.1 | .                  |
| .                  | .                  | .                  | .                  |

|                    |                    |                    |                    |   |   |   |
|--------------------|--------------------|--------------------|--------------------|---|---|---|
| Vv19g0832          | Tc07_g001060       | .                  | .                  | . | . | . |
| .                  | .                  | .                  | .                  | . | . | . |
| Vv19g0833          | .                  | .                  | Gorai.002G100900.1 | . | . | . |
| .                  | .                  | .                  | .                  | . | . | . |
| Vv19g0834          | .                  | .                  | .                  | . | . | . |
| .                  | .                  | .                  | .                  | . | . | . |
| Vv19g0835          | Tc07_g001030       | Gorai.013G151900.1 | Gorai.             | . | . | . |
| 007G310200.1       | Gorai.002G101100.1 | .                  | Vv12g0775          | . | . | . |
| Tc01_g019140       | Gorai.007G165500.1 | .                  | .                  | . | . | . |
| .                  | .                  | .                  | .                  | . | . | . |
| Vv19g0836          | Tc07_g001020       | Gorai.013G151700.1 | .                  | . | . | . |
| Gorai.002G101200.1 | .                  | Vv12g0774          | .                  | . | . | . |
| Tc01_g019150       | Gorai.001G223000.1 | .                  | .                  | . | . | . |
| .                  | .                  | .                  | .                  | . | . | . |
| Vv19g0837          | Tc07_g001000       | .                  | .                  | . | . | . |
| .                  | .                  | .                  | .                  | . | . | . |
| Vv19g0838          | Tc07_g000990       | .                  | Gorai.002G101400.1 | . | . | . |
| .                  | .                  | .                  | .                  | . | . | . |
| Vv19g0839          | Tc07_g000940       | .                  | Gorai.007G309200.1 | . | . | . |
| Gorai.002G101600.1 | .                  | .                  | .                  | . | . | . |
| .                  | .                  | .                  | .                  | . | . | . |
| Vv19g0840          | .                  | .                  | .                  | . | . | . |
| .                  | .                  | .                  | .                  | . | . | . |
| Vv19g0841          | .                  | .                  | .                  | . | . | . |
| .                  | .                  | .                  | .                  | . | . | . |
| Vv19g0842          | Tc07_g000920       | Gorai.013G151600.1 | .                  | . | . | . |
| Gorai.002G101700.1 | .                  | .                  | .                  | . | . | . |
| .                  | .                  | .                  | .                  | . | . | . |
| Vv19g0843          | Tc07_g000910       | .                  | Gorai.002G101800.1 | . | . | . |
| .                  | .                  | .                  | .                  | . | . | . |
| Vv19g0844          | Tc07_g000900       | Gorai.013G151500.1 | .                  | . | . | . |
| Gorai.002G101900.1 | Gorai.009G451400.1 | .                  | .                  | . | . | . |
| .                  | .                  | .                  | .                  | . | . | . |
| Vv19g0845          | .                  | .                  | .                  | . | . | . |
| .                  | .                  | .                  | .                  | . | . | . |
| Vv19g0846          | Tc07_g000890       | Gorai.013G151400.1 | .                  | . | . | . |
| Gorai.002G102000.1 | Gorai.009G451500.1 | .                  | .                  | . | . | . |



|                    |              |                    |
|--------------------|--------------|--------------------|
| Vv19g0847          | Tc07_g000880 | Gorai.002G102100.1 |
| Vv19g0848          |              |                    |
| Vv19g0849          |              |                    |
| Vv19g0850          |              |                    |
| Vv19g0851          | Tc07_g000870 | Gorai.013G151300.1 |
| Gorai.002G102200.1 |              |                    |
| Vv19g0852          |              |                    |
| Vv19g0853          |              |                    |
| Vv19g0854          |              |                    |
| Vv19g0855          | Tc07_g000860 |                    |
| Vv19g0856          |              |                    |
| Vv19g0857          | Tc07_g000850 |                    |
| Vv19g0858          |              |                    |
| Vv19g0859          | Tc07_g000840 |                    |
| Vv19g0860          | Tc07_g000830 |                    |
| Vv19g0861          |              |                    |
| Vv19g0862          | Tc07_g000800 |                    |

|                    |                    |                    |                    |
|--------------------|--------------------|--------------------|--------------------|
| Vv19g0863          | Tc07_g000790       | Gorai.013G150900.1 | Gorai.             |
| 007G165200.1       | Gorai.002G102300.1 | .                  | Vv12g0767          |
|                    | Tc01_g019220       | Gorai.007G165200.1 | .                  |
|                    | Gorai.001G098400.1 | .                  | .                  |
| Vv19g0864          | Tc07_g000770       | .                  | Gorai.002G102400.1 |
| .                  | .                  | .                  | .                  |
| Vv19g0865          | Tc07_g000760       | Gorai.013G150800.1 | .                  |
| .                  | .                  | .                  | .                  |
| Vv19g0866          | Tc07_g000750       | .                  | .                  |
| .                  | .                  | .                  | .                  |
| Vv19g0867          | .                  | .                  | .                  |
| .                  | .                  | .                  | .                  |
| Vv19g0868          | Tc07_g000740       | .                  | Gorai.002G102500.1 |
| .                  | .                  | .                  | .                  |
| Vv19g0869          | Tc07_g000730       | Gorai.013G150700.1 | .                  |
| .                  | .                  | .                  | .                  |
| Vv19g0870          | Tc07_g000720       | Gorai.013G150600.1 | .                  |
| Gorai.002G102600.1 | .                  | .                  | .                  |
| .                  | .                  | .                  | .                  |
| Vv19g0871          | .                  | .                  | .                  |
| .                  | .                  | .                  | .                  |
| Vv19g0872          | Tc07_g000710       | .                  | Gorai.002G102700.1 |
| .                  | .                  | .                  | .                  |
| Vv19g0873          | .                  | .                  | .                  |
| .                  | .                  | .                  | .                  |
| Vv19g0874          | .                  | .                  | .                  |
| .                  | .                  | .                  | .                  |
| Vv19g0875          | .                  | .                  | .                  |
| .                  | .                  | .                  | .                  |
| Vv19g0876          | Tc07_g000690       | .                  | .                  |
| .                  | .                  | .                  | .                  |
| Vv19g0877          | .                  | .                  | .                  |
| .                  | .                  | .                  | .                  |
| Vv19g0878          | Tc07_g000680       | Gorai.013G150400.1 | .                  |

|                    |                    |                    |   |                    |   |   |
|--------------------|--------------------|--------------------|---|--------------------|---|---|
| Gorai.002G102900.1 | .                  | .                  | . | .                  | . | . |
| .                  | .                  | .                  | . | .                  | . | . |
| Vv19g0879          | Tc07_g000670       | Gorai.013G150300.1 | . | .                  | . | . |
| .                  | .                  | .                  | . | .                  | . | . |
| Vv19g0880          | .                  | Gorai.002G103000.1 | . | .                  | . | . |
| .                  | .                  | .                  | . | .                  | . | . |
| Vv19g0881          | Tc07_g000660       | .                  | . | Gorai.002G103100.1 | . | . |
| .                  | .                  | .                  | . | .                  | . | . |
| Vv19g0882          | Tc07_g000650       | .                  | . | Gorai.002G103200.1 | . | . |
| Gorai.009G451900.1 | .                  | Vv12g0758          | . | .                  | . | . |
| .                  | Gorai.001G189900.1 | .                  | . | .                  | . | . |
| .                  | .                  | .                  | . | .                  | . | . |
| Vv19g0883          | Tc07_g000640       | .                  | . | Gorai.002G103300.1 | . | . |
| Gorai.009G452000.1 | .                  | .                  | . | .                  | . | . |
| .                  | .                  | .                  | . | .                  | . | . |
| .                  | .                  | .                  | . | .                  | . | . |
| Vv19g0884          | Tc07_g000630       | .                  | . | Gorai.             | . | . |
| 009G452100.1       | Vv12g0757          | .                  | . | Gorai.             | . | . |
| 001G224000.1       | Gorai.001G189700.1 | Gorai.004G060700.1 | . | .                  | . | . |
| .                  | .                  | .                  | . | .                  | . | . |
| Vv19g0885          | Tc07_g000610       | .                  | . | Gorai.002G103500.1 | . | . |
| Gorai.009G452300.1 | .                  | .                  | . | .                  | . | . |
| .                  | .                  | .                  | . | .                  | . | . |
| .                  | .                  | .                  | . | .                  | . | . |
| Vv19g0886          | Gorai.013G148400.1 | .                  | . | .                  | . | . |
| .                  | .                  | .                  | . | .                  | . | . |
| .                  | .                  | .                  | . | .                  | . | . |
| Vv19g0887          | .                  | .                  | . | .                  | . | . |
| .                  | .                  | .                  | . | .                  | . | . |
| .                  | .                  | .                  | . | .                  | . | . |
| Vv19g0888          | .                  | .                  | . | .                  | . | . |
| .                  | .                  | .                  | . | .                  | . | . |
| .                  | .                  | .                  | . | .                  | . | . |
| Vv19g0889          | .                  | .                  | . | .                  | . | . |
| .                  | .                  | .                  | . | .                  | . | . |
| .                  | .                  | .                  | . | .                  | . | . |
| Vv19g0890          | .                  | .                  | . | .                  | . | . |
| .                  | .                  | .                  | . | .                  | . | . |
| .                  | .                  | .                  | . | .                  | . | . |
| Vv19g0891          | .                  | .                  | . | .                  | . | . |
| .                  | .                  | .                  | . | .                  | . | . |
| .                  | .                  | .                  | . | .                  | . | . |
| Vv19g0892          | .                  | .                  | . | .                  | . | . |
| .                  | .                  | .                  | . | .                  | . | . |
| .                  | .                  | .                  | . | .                  | . | . |
| Vv19g0893          | .                  | Gorai.002G104000.1 | . | .                  | . | . |

|           |   |   |                    |                    |   |   |   |
|-----------|---|---|--------------------|--------------------|---|---|---|
| .         | . | . | .                  | .                  | . | . | . |
| Vv19g0894 | . | . | .                  | .                  | . | . | . |
| .         | . | . | .                  | .                  | . | . | . |
| Vv19g0895 | . | . | .                  | .                  | . | . | . |
| .         | . | . | .                  | .                  | . | . | . |
| Vv19g0896 | . | . | .                  | Gorai.002G105300.1 | . | . | . |
| .         | . | . | .                  | .                  | . | . | . |
| Vv19g0897 | . | . | .                  | .                  | . | . | . |
| .         | . | . | .                  | .                  | . | . | . |
| Vv19g0898 | . | . | .                  | .                  | . | . | . |
| .         | . | . | .                  | .                  | . | . | . |
| Vv19g0899 | . | . | .                  | .                  | . | . | . |
| .         | . | . | .                  | .                  | . | . | . |
| Vv19g0900 | . | . | .                  | .                  | . | . | . |
| .         | . | . | .                  | .                  | . | . | . |
| Vv19g0901 | . | . | .                  | .                  | . | . | . |
| .         | . | . | .                  | .                  | . | . | . |
| Vv19g0902 | . | . | .                  | .                  | . | . | . |
| .         | . | . | .                  | .                  | . | . | . |
| Vv19g0903 | . | . | .                  | .                  | . | . | . |
| .         | . | . | .                  | .                  | . | . | . |
| Vv19g0904 | . | . | .                  | .                  | . | . | . |
| .         | . | . | .                  | .                  | . | . | . |
| Vv19g0905 | . | . | .                  | .                  | . | . | . |
| Vv12g0744 | . | . | .                  | .                  | . | . | . |
| .         | . | . | .                  | .                  | . | . | . |
| Vv19g0906 | . | . | .                  | .                  | . | . | . |
| .         | . | . | .                  | .                  | . | . | . |
| Vv19g0907 | . | . | .                  | .                  | . | . | . |
| .         | . | . | .                  | .                  | . | . | . |
| Vv19g0908 | . | . | Gorai.007G163800.1 | .                  | . | . | . |
| .         | . | . | .                  | .                  | . | . | . |
| Vv19g0909 | . | . | .                  | .                  | . | . | . |
| .         | . | . | .                  | .                  | . | . | . |
| .         | . | . | .                  | .                  | . | . | . |

|           |   |   |                    |   |   |                    |   |
|-----------|---|---|--------------------|---|---|--------------------|---|
| Vv19g0910 | . | . | .                  | . | . | .                  | . |
| .         | . | . | .                  | . | . | .                  | . |
| Vv19g0911 | . | . | .                  | . | . | .                  | . |
| .         | . | . | .                  | . | . | .                  | . |
| Vv19g0912 | . | . | .                  | . | . | .                  | . |
| .         | . | . | .                  | . | . | .                  | . |
| Vv19g0913 | . | . | .                  | . | . | .                  | . |
| .         | . | . | .                  | . | . | .                  | . |
| Vv19g0914 | . | . | .                  | . | . | .                  | . |
| .         | . | . | .                  | . | . | .                  | . |
| Vv19g0915 | . | . | .                  | . | . | .                  | . |
| .         | . | . | .                  | . | . | .                  | . |
| Vv19g0916 | . | . | .                  | . | . | .                  | . |
| .         | . | . | .                  | . | . | .                  | . |
| Vv19g0917 | . | . | .                  | . | . | .                  | . |
| .         | . | . | .                  | . | . | .                  | . |
| Vv19g0918 | . | . | .                  | . | . | .                  | . |
| .         | . | . | .                  | . | . | .                  | . |
| Vv19g0919 | . | . | .                  | . | . | .                  | . |
| .         | . | . | .                  | . | . | .                  | . |
| Vv19g0920 | . | . | .                  | . | . | .                  | . |
| .         | . | . | .                  | . | . | .                  | . |
| Vv19g0921 | . | . | .                  | . | . | Gorai.009G453000.1 | . |
| .         | . | . | .                  | . | . | .                  | . |
| Vv19g0922 | . | . | Gorai.013G145200.1 | . | . | Gorai.007G161600.1 | . |
| .         | . | . | .                  | . | . | .                  | . |
| Vv19g0923 | . | . | .                  | . | . | .                  | . |
| .         | . | . | .                  | . | . | .                  | . |
| Vv19g0924 | . | . | .                  | . | . | .                  | . |
| .         | . | . | .                  | . | . | .                  | . |
| Vv19g0925 | . | . | .                  | . | . | .                  | . |
| .         | . | . | .                  | . | . | .                  | . |
| Vv19g0926 | . | . | .                  | . | . | .                  | . |

|           |   |   |   |   |   |   |   |
|-----------|---|---|---|---|---|---|---|
| .         | . | . | . | . | . | . | . |
| Vv19g0927 | . | . | . | . | . | . | . |
| .         | . | . | . | . | . | . | . |
| Vv19g0928 | . | . | . | . | . | . | . |
| .         | . | . | . | . | . | . | . |
| Vv19g0929 | . | . | . | . | . | . | . |
| .         | . | . | . | . | . | . | . |
| Vv19g0930 | . | . | . | . | . | . | . |
| .         | . | . | . | . | . | . | . |
| Vv19g0931 | . | . | . | . | . | . | . |
| .         | . | . | . | . | . | . | . |
| Vv19g0932 | . | . | . | . | . | . | . |
| .         | . | . | . | . | . | . | . |
| Vv19g0933 | . | . | . | . | . | . | . |
| .         | . | . | . | . | . | . | . |
| Vv19g0934 | . | . | . | . | . | . | . |
| .         | . | . | . | . | . | . | . |
| Vv19g0935 | . | . | . | . | . | . | . |
| .         | . | . | . | . | . | . | . |
| Vv19g0936 | . | . | . | . | . | . | . |
| .         | . | . | . | . | . | . | . |
| Vv19g0937 | . | . | . | . | . | . | . |
| .         | . | . | . | . | . | . | . |
| Vv19g0938 | . | . | . | . | . | . | . |
| .         | . | . | . | . | . | . | . |
| Vv19g0939 | . | . | . | . | . | . | . |
| .         | . | . | . | . | . | . | . |
| Vv19g0940 | . | . | . | . | . | . | . |
| .         | . | . | . | . | . | . | . |
| Vv19g0941 | . | . | . | . | . | . | . |
| .         | . | . | . | . | . | . | . |
| Vv19g0942 | . | . | . | . | . | . | . |
| .         | . | . | . | . | . | . | . |
| .         | . | . | . | . | . | . | . |

|                    |              |   |   |   |                    |   |   |
|--------------------|--------------|---|---|---|--------------------|---|---|
| Vv19g0943          | .            | . | . | . | .                  | . | . |
| .                  | .            | . | . | . | .                  | . | . |
| Vv19g0944          | .            | . | . | . | .                  | . | . |
| .                  | .            | . | . | . | .                  | . | . |
| Vv19g0945          | .            | . | . | . | .                  | . | . |
| .                  | .            | . | . | . | .                  | . | . |
| Vv19g0946          | .            | . | . | . | .                  | . | . |
| .                  | .            | . | . | . | .                  | . | . |
| Vv19g0947          | .            | . | . | . | .                  | . | . |
| .                  | .            | . | . | . | .                  | . | . |
| Vv19g0948          | .            | . | . | . | Gorai.002G038700.1 | . | . |
| Gorai.009G359400.1 | .            | . | . | . | .                  | . | . |
| .                  | .            | . | . | . | .                  | . | . |
| Vv19g0949          | .            | . | . | . | .                  | . | . |
| .                  | .            | . | . | . | .                  | . | . |
| Vv19g0950          | .            | . | . | . | .                  | . | . |
| .                  | .            | . | . | . | .                  | . | . |
| Vv19g0951          | .            | . | . | . | .                  | . | . |
| .                  | .            | . | . | . | .                  | . | . |
| Vv19g0952          | Tc07_g012770 | . | . | . | Gorai.002G038300.1 | . | . |
| Gorai.009G358200.1 | .            | . | . | . | .                  | . | . |
| .                  | .            | . | . | . | .                  | . | . |
| Vv19g0953          | .            | . | . | . | .                  | . | . |
| .                  | .            | . | . | . | .                  | . | . |
| Vv19g0954          | .            | . | . | . | .                  | . | . |
| .                  | .            | . | . | . | .                  | . | . |
| Vv19g0955          | .            | . | . | . | Gorai.009G358000.1 | . | . |
| .                  | .            | . | . | . | .                  | . | . |
| Vv19g0956          | .            | . | . | . | .                  | . | . |
| .                  | .            | . | . | . | .                  | . | . |
| Vv19g0957          | Tc07_g012780 | . | . | . | Gorai.002G038100.1 | . | . |
| .                  | .            | . | . | . | .                  | . | . |
| Vv19g0958          | .            | . | . | . | .                  | . | . |
| .                  | .            | . | . | . | .                  | . | . |
| .                  | .            | . | . | . | .                  | . | . |

|           |              |   |   |   |                    |   |   |
|-----------|--------------|---|---|---|--------------------|---|---|
| Vv19g0959 | .            | . | . | . | .                  | . | . |
| .         | .            | . | . | . | .                  | . | . |
| Vv19g0960 | .            | . | . | . | .                  | . | . |
| .         | .            | . | . | . | .                  | . | . |
| Vv19g0961 | Tc07_g012790 | . | . | . | Gorai.002G038000.1 | . | . |
| .         | .            | . | . | . | .                  | . | . |
| Vv19g0962 | .            | . | . | . | .                  | . | . |
| .         | .            | . | . | . | .                  | . | . |
| Vv19g0963 | .            | . | . | . | .                  | . | . |
| .         | .            | . | . | . | .                  | . | . |
| Vv19g0964 | .            | . | . | . | .                  | . | . |
| .         | .            | . | . | . | .                  | . | . |
| Vv19g0965 | .            | . | . | . | .                  | . | . |
| .         | .            | . | . | . | .                  | . | . |
| Vv19g0966 | .            | . | . | . | .                  | . | . |
| .         | .            | . | . | . | .                  | . | . |
| Vv19g0967 | .            | . | . | . | .                  | . | . |
| .         | .            | . | . | . | .                  | . | . |
| Vv19g0968 | .            | . | . | . | .                  | . | . |
| .         | .            | . | . | . | .                  | . | . |
| Vv19g0969 | .            | . | . | . | .                  | . | . |
| .         | .            | . | . | . | .                  | . | . |
| Vv19g0970 | .            | . | . | . | .                  | . | . |
| .         | .            | . | . | . | .                  | . | . |
| Vv19g0971 | .            | . | . | . | .                  | . | . |
| .         | .            | . | . | . | .                  | . | . |
| Vv19g0972 | .            | . | . | . | .                  | . | . |
| .         | .            | . | . | . | .                  | . | . |
| Vv19g0973 | Tc07_g006250 | . | . | . | .                  | . | . |
| .         | .            | . | . | . | .                  | . | . |
| Vv19g0974 | .            | . | . | . | .                  | . | . |
| .         | .            | . | . | . | .                  | . | . |
| Vv19g0975 | .            | . | . | . | .                  | . | . |
| .         | .            | . | . | . | .                  | . | . |



|              |              |   |   |   |   |                    |   |
|--------------|--------------|---|---|---|---|--------------------|---|
| Vv19g0976    | .            | . | . | . | . | .                  | . |
| .            | .            | . | . | . | . | .                  | . |
| Vv19g0977    | .            | . | . | . | . | .                  | . |
| .            | .            | . | . | . | . | .                  | . |
| Vv19g0978    | Tc07_g012850 | . | . | . | . | Gorai.             | . |
| 009G357900.1 | .            | . | . | . | . | .                  | . |
| .            | .            | . | . | . | . | .                  | . |
| Vv19g0979    | Tc07_g012880 | . | . | . | . | Gorai.             | . |
| 009G357800.1 | .            | . | . | . | . | .                  | . |
| .            | .            | . | . | . | . | .                  | . |
| Vv19g0980    | .            | . | . | . | . | .                  | . |
| .            | .            | . | . | . | . | .                  | . |
| Vv19g0981    | .            | . | . | . | . | .                  | . |
| .            | .            | . | . | . | . | .                  | . |
| Vv19g0982    | .            | . | . | . | . | .                  | . |
| .            | .            | . | . | . | . | .                  | . |
| Vv19g0983    | .            | . | . | . | . | .                  | . |
| .            | .            | . | . | . | . | .                  | . |
| Vv19g0984    | .            | . | . | . | . | Gorai.009G355400.1 | . |
| .            | .            | . | . | . | . | .                  | . |
| Vv19g0985    | .            | . | . | . | . | .                  | . |
| .            | .            | . | . | . | . | .                  | . |
| Vv19g0986    | .            | . | . | . | . | .                  | . |
| .            | .            | . | . | . | . | .                  | . |
| Vv19g0987    | .            | . | . | . | . | .                  | . |
| .            | .            | . | . | . | . | .                  | . |
| Vv19g0988    | .            | . | . | . | . | .                  | . |
| .            | .            | . | . | . | . | .                  | . |
| Vv19g0989    | .            | . | . | . | . | .                  | . |
| .            | .            | . | . | . | . | .                  | . |
| Vv19g0990    | Tc07_g011680 | . | . | . | . | .                  | . |
| .            | .            | . | . | . | . | .                  | . |
| Vv19g0991    | .            | . | . | . | . | .                  | . |
| .            | .            | . | . | . | . | .                  | . |
| Vv19g0992    | .            | . | . | . | . | .                  | . |

|           |              |   |   |   |   |   |   |
|-----------|--------------|---|---|---|---|---|---|
| .         | .            | . | . | . | . | . | . |
| .         | .            | . | . | . | . | . | . |
| Vv19g0993 | .            | . | . | . | . | . | . |
| .         | .            | . | . | . | . | . | . |
| Vv19g0994 | .            | . | . | . | . | . | . |
| .         | .            | . | . | . | . | . | . |
| Vv19g0995 | Tc07_g011750 | . | . | . | . | . | . |
| .         | .            | . | . | . | . | . | . |
| Vv19g0996 | .            | . | . | . | . | . | . |
| .         | .            | . | . | . | . | . | . |
| Vv19g0997 | .            | . | . | . | . | . | . |
| .         | .            | . | . | . | . | . | . |
| Vv19g0998 | Tc07_g006270 | . | . | . | . | . | . |
| .         | .            | . | . | . | . | . | . |
| Vv19g0999 | .            | . | . | . | . | . | . |
| .         | .            | . | . | . | . | . | . |
| Vv19g1000 | .            | . | . | . | . | . | . |
| .         | .            | . | . | . | . | . | . |
| Vv19g1001 | .            | . | . | . | . | . | . |
| .         | .            | . | . | . | . | . | . |
| Vv19g1002 | .            | . | . | . | . | . | . |
| .         | .            | . | . | . | . | . | . |
| Vv19g1003 | .            | . | . | . | . | . | . |
| .         | .            | . | . | . | . | . | . |
| Vv19g1004 | .            | . | . | . | . | . | . |
| .         | .            | . | . | . | . | . | . |
| Vv19g1005 | .            | . | . | . | . | . | . |
| .         | .            | . | . | . | . | . | . |
| Vv19g1006 | .            | . | . | . | . | . | . |
| .         | .            | . | . | . | . | . | . |
| Vv19g1007 | .            | . | . | . | . | . | . |
| .         | .            | . | . | . | . | . | . |
| Vv19g1008 | .            | . | . | . | . | . | . |
| .         | .            | . | . | . | . | . | . |
| .         | .            | . | . | . | . | . | . |

|           |              |   |   |                    |
|-----------|--------------|---|---|--------------------|
| Vv19g1009 | Tc07_g012940 | . | . | Gorai.002G037400.1 |
| .         | .            | . | . | .                  |
| .         | .            | . | . | .                  |
| Vv19g1010 | Tc07_g013070 | . | . | Gorai.002G036800.1 |
| .         | .            | . | . | .                  |
| .         | .            | . | . | .                  |
| Vv19g1011 | .            | . | . | .                  |
| .         | .            | . | . | .                  |
| .         | .            | . | . | .                  |
| Vv19g1012 | Tc07_g011760 | . | . | .                  |
| .         | .            | . | . | .                  |
| .         | .            | . | . | .                  |
| Vv19g1013 | .            | . | . | .                  |
| .         | .            | . | . | .                  |
| .         | .            | . | . | .                  |
| Vv19g1014 | .            | . | . | .                  |
| .         | .            | . | . | .                  |
| .         | .            | . | . | .                  |
| Vv19g1015 | .            | . | . | .                  |
| .         | .            | . | . | .                  |
| .         | .            | . | . | .                  |
| Vv19g1016 | .            | . | . | .                  |
| .         | .            | . | . | .                  |
| .         | .            | . | . | .                  |
| Vv19g1017 | .            | . | . | .                  |
| .         | .            | . | . | .                  |
| .         | .            | . | . | .                  |
| Vv19g1018 | .            | . | . | .                  |
| .         | .            | . | . | .                  |
| .         | .            | . | . | .                  |
| Vv19g1019 | .            | . | . | .                  |
| .         | .            | . | . | .                  |
| .         | .            | . | . | .                  |
| Vv19g1020 | .            | . | . | .                  |
| .         | .            | . | . | .                  |
| .         | .            | . | . | .                  |
| Vv19g1021 | .            | . | . | .                  |
| .         | .            | . | . | .                  |
| .         | .            | . | . | .                  |
| Vv19g1022 | .            | . | . | .                  |
| .         | .            | . | . | .                  |
| .         | .            | . | . | .                  |
| Vv19g1023 | Tc07_g011770 | . | . | .                  |
| .         | .            | . | . | .                  |
| .         | .            | . | . | .                  |
| Vv19g1024 | .            | . | . | .                  |
| .         | .            | . | . | .                  |
| .         | .            | . | . | .                  |
| Vv19g1025 | Tc07_g011800 | . | . | .                  |
| .         | .            | . | . | .                  |

|           |              |   |   |                    |   |   |   |
|-----------|--------------|---|---|--------------------|---|---|---|
| Vv19g1026 | .            | . | . | .                  | . | . | . |
| .         | .            | . | . | .                  | . | . | . |
| Vv19g1027 | .            | . | . | .                  | . | . | . |
| .         | .            | . | . | .                  | . | . | . |
| Vv19g1028 | .            | . | . | .                  | . | . | . |
| .         | .            | . | . | .                  | . | . | . |
| Vv19g1029 | .            | . | . | .                  | . | . | . |
| .         | .            | . | . | .                  | . | . | . |
| Vv19g1030 | Tc07_g013100 | . | . | .                  | . | . | . |
| .         | .            | . | . | .                  | . | . | . |
| Vv19g1031 | .            | . | . | .                  | . | . | . |
| .         | .            | . | . | .                  | . | . | . |
| Vv19g1032 | .            | . | . | .                  | . | . | . |
| .         | .            | . | . | .                  | . | . | . |
| Vv19g1033 | .            | . | . | .                  | . | . | . |
| .         | .            | . | . | .                  | . | . | . |
| Vv19g1034 | Tc07_g013130 | . | . | Gorai.002G036700.1 | . | . | . |
| .         | .            | . | . | .                  | . | . | . |
| Vv19g1035 | .            | . | . | .                  | . | . | . |
| .         | .            | . | . | .                  | . | . | . |
| Vv19g1036 | .            | . | . | .                  | . | . | . |
| .         | .            | . | . | .                  | . | . | . |
| Vv19g1037 | .            | . | . | .                  | . | . | . |
| .         | .            | . | . | .                  | . | . | . |
| Vv19g1038 | .            | . | . | .                  | . | . | . |
| .         | .            | . | . | .                  | . | . | . |
| Vv19g1039 | .            | . | . | .                  | . | . | . |
| .         | .            | . | . | .                  | . | . | . |
| Vv19g1040 | .            | . | . | .                  | . | . | . |
| .         | .            | . | . | .                  | . | . | . |
| Vv19g1041 | .            | . | . | .                  | . | . | . |
| .         | .            | . | . | .                  | . | . | . |
| Vv19g1042 | .            | . | . | .                  | . | . | . |

|           |              |   |   |   |                    |   |   |
|-----------|--------------|---|---|---|--------------------|---|---|
| .         | .            | . | . | . | .                  | . | . |
| .         | .            | . | . | . | .                  | . | . |
| Vv19g1043 | .            | . | . | . | .                  | . | . |
| .         | .            | . | . | . | .                  | . | . |
| Vv19g1044 | .            | . | . | . | .                  | . | . |
| .         | .            | . | . | . | .                  | . | . |
| Vv19g1045 | .            | . | . | . | .                  | . | . |
| .         | .            | . | . | . | .                  | . | . |
| Vv19g1046 | Tc07_g013190 | . | . | . | .                  | . | . |
| .         | .            | . | . | . | .                  | . | . |
| Vv19g1047 | .            | . | . | . | .                  | . | . |
| .         | .            | . | . | . | .                  | . | . |
| Vv19g1048 | .            | . | . | . | .                  | . | . |
| .         | .            | . | . | . | .                  | . | . |
| Vv19g1049 | .            | . | . | . | .                  | . | . |
| .         | .            | . | . | . | .                  | . | . |
| Vv19g1050 | .            | . | . | . | .                  | . | . |
| .         | .            | . | . | . | .                  | . | . |
| Vv19g1051 | .            | . | . | . | .                  | . | . |
| .         | .            | . | . | . | .                  | . | . |
| Vv19g1052 | .            | . | . | . | .                  | . | . |
| .         | .            | . | . | . | .                  | . | . |
| Vv19g1053 | .            | . | . | . | .                  | . | . |
| .         | .            | . | . | . | .                  | . | . |
| Vv19g1054 | .            | . | . | . | .                  | . | . |
| .         | .            | . | . | . | .                  | . | . |
| Vv19g1055 | .            | . | . | . | .                  | . | . |
| .         | .            | . | . | . | .                  | . | . |
| Vv19g1056 | .            | . | . | . | .                  | . | . |
| .         | .            | . | . | . | .                  | . | . |
| Vv19g1057 | .            | . | . | . | .                  | . | . |
| .         | .            | . | . | . | .                  | . | . |
| Vv19g1058 | Tc07_g013200 | . | . | . | Gorai.002G036600.1 | . | . |
| .         | .            | . | . | . | .                  | . | . |
| .         | .            | . | . | . | .                  | . | . |

|           |              |   |   |   |                    |   |   |
|-----------|--------------|---|---|---|--------------------|---|---|
| Vv19g1059 | .            | . | . | . | .                  | . | . |
| .         | .            | . | . | . | .                  | . | . |
| Vv19g1060 | Tc07_g013260 | . | . | . | .                  | . | . |
| .         | .            | . | . | . | .                  | . | . |
| Vv19g1061 | Tc07_g013280 | . | . | . | Gorai.002G036500.1 | . | . |
| .         | .            | . | . | . | .                  | . | . |
| Vv19g1062 | .            | . | . | . | .                  | . | . |
| .         | .            | . | . | . | .                  | . | . |
| Vv19g1063 | .            | . | . | . | .                  | . | . |
| .         | .            | . | . | . | .                  | . | . |
| Vv19g1064 | .            | . | . | . | .                  | . | . |
| .         | .            | . | . | . | .                  | . | . |
| Vv19g1065 | .            | . | . | . | .                  | . | . |
| .         | .            | . | . | . | .                  | . | . |
| Vv19g1066 | .            | . | . | . | .                  | . | . |
| .         | .            | . | . | . | .                  | . | . |
| Vv19g1067 | .            | . | . | . | .                  | . | . |
| .         | .            | . | . | . | .                  | . | . |
| Vv19g1068 | .            | . | . | . | .                  | . | . |
| .         | .            | . | . | . | .                  | . | . |
| Vv19g1069 | .            | . | . | . | .                  | . | . |
| .         | .            | . | . | . | .                  | . | . |
| Vv19g1070 | .            | . | . | . | .                  | . | . |
| .         | .            | . | . | . | .                  | . | . |
| Vv19g1071 | .            | . | . | . | .                  | . | . |
| .         | .            | . | . | . | .                  | . | . |
| Vv19g1072 | .            | . | . | . | .                  | . | . |
| .         | .            | . | . | . | .                  | . | . |
| Vv19g1073 | .            | . | . | . | .                  | . | . |
| .         | .            | . | . | . | .                  | . | . |
| Vv19g1074 | .            | . | . | . | .                  | . | . |
| .         | .            | . | . | . | .                  | . | . |
| Vv19g1075 | .            | . | . | . | .                  | . | . |
| .         | .            | . | . | . | .                  | . | . |

|           |              |  |  |                    |  |  |
|-----------|--------------|--|--|--------------------|--|--|
| Vv19g1076 |              |  |  |                    |  |  |
| Vv19g1077 |              |  |  |                    |  |  |
| Vv19g1078 | Tc07_g013370 |  |  | Gorai.002G036400.1 |  |  |
| Vv19g1079 |              |  |  |                    |  |  |
| Vv19g1080 | Tc07_g013380 |  |  |                    |  |  |
| Vv19g1081 |              |  |  |                    |  |  |
| Vv19g1082 |              |  |  |                    |  |  |
| Vv19g1083 |              |  |  |                    |  |  |
| Vv19g1084 |              |  |  |                    |  |  |
| Vv19g1085 |              |  |  |                    |  |  |
| Vv19g1086 |              |  |  |                    |  |  |
| Vv19g1087 |              |  |  | Gorai.002G036300.1 |  |  |
| Vv19g1088 | Tc07_g013410 |  |  | Gorai.002G036000.1 |  |  |
| Vv19g1089 | Tc07_g013440 |  |  |                    |  |  |
| Vv19g1090 |              |  |  | Gorai.002G035700.1 |  |  |
| Vv19g1091 |              |  |  |                    |  |  |
| Vv19g1092 |              |  |  |                    |  |  |

|           |              |   |   |   |   |   |   |
|-----------|--------------|---|---|---|---|---|---|
| .         | .            | . | . | . | . | . | . |
| .         | .            | . | . | . | . | . | . |
| Vv19g1093 | .            | . | . | . | . | . | . |
| .         | .            | . | . | . | . | . | . |
| Vv19g1094 | .            | . | . | . | . | . | . |
| .         | .            | . | . | . | . | . | . |
| Vv19g1095 | .            | . | . | . | . | . | . |
| .         | .            | . | . | . | . | . | . |
| Vv19g1096 | .            | . | . | . | . | . | . |
| .         | .            | . | . | . | . | . | . |
| Vv19g1097 | .            | . | . | . | . | . | . |
| .         | .            | . | . | . | . | . | . |
| Vv19g1098 | .            | . | . | . | . | . | . |
| .         | .            | . | . | . | . | . | . |
| Vv19g1099 | .            | . | . | . | . | . | . |
| .         | .            | . | . | . | . | . | . |
| Vv19g1100 | .            | . | . | . | . | . | . |
| .         | .            | . | . | . | . | . | . |
| Vv19g1101 | .            | . | . | . | . | . | . |
| .         | .            | . | . | . | . | . | . |
| Vv19g1102 | Tc07_g014120 | . | . | . | . | . | . |
| .         | .            | . | . | . | . | . | . |
| Vv19g1103 | .            | . | . | . | . | . | . |
| .         | .            | . | . | . | . | . | . |
| Vv19g1104 | Tc07_g014310 | . | . | . | . | . | . |
| .         | .            | . | . | . | . | . | . |
| Vv19g1105 | .            | . | . | . | . | . | . |
| .         | .            | . | . | . | . | . | . |
| Vv19g1106 | .            | . | . | . | . | . | . |
| .         | .            | . | . | . | . | . | . |
| Vv19g1107 | Tc07_g014460 | . | . | . | . | . | . |
| .         | .            | . | . | . | . | . | . |
| Vv19g1108 | .            | . | . | . | . | . | . |
| .         | .            | . | . | . | . | . | . |
| .         | .            | . | . | . | . | . | . |



|           |              |   |   |   |                    |   |   |
|-----------|--------------|---|---|---|--------------------|---|---|
| Vv19g1109 | .            | . | . | . | .                  | . | . |
| .         | .            | . | . | . | .                  | . | . |
| Vv19g1110 | Tc07_g014720 | . | . | . | Gorai.002G035500.1 | . | . |
| .         | .            | . | . | . | .                  | . | . |
| Vv19g1111 | .            | . | . | . | .                  | . | . |
| .         | .            | . | . | . | .                  | . | . |
| Vv19g1112 | .            | . | . | . | .                  | . | . |
| .         | .            | . | . | . | .                  | . | . |
| Vv19g1113 | .            | . | . | . | .                  | . | . |
| .         | .            | . | . | . | .                  | . | . |
| Vv19g1114 | .            | . | . | . | .                  | . | . |
| .         | .            | . | . | . | .                  | . | . |
| Vv19g1115 | .            | . | . | . | .                  | . | . |
| .         | .            | . | . | . | .                  | . | . |
| Vv19g1116 | .            | . | . | . | .                  | . | . |
| .         | .            | . | . | . | .                  | . | . |
| Vv19g1117 | .            | . | . | . | .                  | . | . |
| .         | .            | . | . | . | .                  | . | . |
| Vv19g1118 | .            | . | . | . | .                  | . | . |
| .         | .            | . | . | . | .                  | . | . |
| Vv19g1119 | .            | . | . | . | .                  | . | . |
| .         | .            | . | . | . | .                  | . | . |
| Vv19g1120 | .            | . | . | . | .                  | . | . |
| .         | .            | . | . | . | .                  | . | . |
| Vv19g1121 | .            | . | . | . | Gorai.002G033000.1 | . | . |
| .         | .            | . | . | . | .                  | . | . |
| Vv19g1122 | .            | . | . | . | .                  | . | . |
| .         | .            | . | . | . | .                  | . | . |
| Vv19g1123 | .            | . | . | . | Gorai.002G032700.1 | . | . |
| .         | .            | . | . | . | .                  | . | . |
| Vv19g1124 | .            | . | . | . | .                  | . | . |
| .         | .            | . | . | . | .                  | . | . |
| Vv19g1125 | .            | . | . | . | .                  | . | . |
| .         | .            | . | . | . | .                  | . | . |

|           |              |   |   |   |   |   |   |
|-----------|--------------|---|---|---|---|---|---|
| Vv19g1126 | .            | . | . | . | . | . | . |
| .         | .            | . | . | . | . | . | . |
| Vv19g1127 | Tc07_g015240 | . | . | . | . | . | . |
| .         | .            | . | . | . | . | . | . |
| Vv19g1128 | .            | . | . | . | . | . | . |
| .         | .            | . | . | . | . | . | . |
| Vv19g1129 | .            | . | . | . | . | . | . |
| .         | .            | . | . | . | . | . | . |
| Vv19g1130 | .            | . | . | . | . | . | . |
| .         | .            | . | . | . | . | . | . |
| Vv19g1131 | .            | . | . | . | . | . | . |
| .         | .            | . | . | . | . | . | . |
| Vv19g1132 | .            | . | . | . | . | . | . |
| .         | .            | . | . | . | . | . | . |
| Vv19g1133 | .            | . | . | . | . | . | . |
| .         | .            | . | . | . | . | . | . |
| Vv19g1134 | .            | . | . | . | . | . | . |
| .         | .            | . | . | . | . | . | . |
| Vv19g1135 | .            | . | . | . | . | . | . |
| .         | .            | . | . | . | . | . | . |
| .         | .            | . | . | . | . | . | . |
